# Supplementary material for: APP Is a Context-Sensitive Regulator of the Hippocampal Presynaptic Active Zone
Source: PLoS Comput Biol. 2016 Apr 19;12(4):e1004832. doi: 10.1371/journal.pcbi.1004832 (PMC4836664; doi:10.1371/journal.pcbi.1004832)
Supplement: S1 Table — List of the hippocampal PAZ core proteome derived from APP-mutants, n = 12. Worksheet 1 “Overlap (APP)”: core constituents are sorted by the ratio APP-KO/wt in an ascending order. Worksheet 2 “Overlap (NexCre)”: core constituents are sorted by the ratio NexCre/wt in an ascending order). The graph displays the distribution of identified proteins according to their changes in abundance (APP/wt, and NexCre/wt). Proteins of the respective functional cluster (Fig 4; subcommunities structure) are listed and their assignment to either functional subnetwork of the synaptic vesicle cycle (Fig 6), functional subnetwork of the cytoskeletal organization (Fig 7), or functional subnetwork of the calcium-homeostasis (Fig 8) is highlighted by an asterisk. (XLSX) [file pcbi.1004832.s001.xlsx]

## Sheet: Overlap (APP)
No.	Name	UniProt. Acc.	Σ# Peptides APP-KO/wt	Σ# Peptides NexCre/wt	Σ Coverage APP-KO/wt	Σ Coverage NexCre/wt	APP-KO/wt	NexCre/wt	Variability [%] APP-KO/wt	Variability [%] NexCre/wt
1	Calmodulin OS=Mus musculus GN=Calm1 PE=1 SV=2 - [CALM_MOUSE]	P62204	6	6	75.17	60.4	0.309	0.542	17.8	14.3			Color-Code
2	Guanine nucleotide-binding protein G(I)/G(S)/G(O) subunit gamma-2 OS=Mus musculus GN=Gng2 PE=2 SV=2 - [GBG2_MOUSE]	P63213	2	5	32.39	49.3	0.37	0.536	5.8	11			APP-KO	APP-KO
3	ATP synthase-coupling factor 6, mitochondrial OS=Mus musculus GN=Atp5j PE=1 SV=1 - [ATP5J_MOUSE]	P97450	8	11	60.19	62.04	0.486	1.227	3	1.9			NexCre	NexCre
4	V-type proton ATPase subunit d 1 OS=Mus musculus GN=Atp6v0d1 PE=1 SV=2 - [VA0D1_MOUSE]	P51863	14	14	30.48	33.62	0.629	0.813	6.4	2.5
5	Guanine nucleotide-binding protein G(I)/G(S)/G(O) subunit gamma-3 OS=Mus musculus GN=Gng3 PE=1 SV=1 - [GBG3_MOUSE]	P63216	2	5	32	38.67	0.634	0.614	6.5	2.7
6	Cytochrome c oxidase subunit 6C OS=Mus musculus GN=Cox6c PE=1 SV=3 - [COX6C_MOUSE]	Q9CPQ1	5	5	36.84	31.58	0.635	0.92	8.2	1.9
7	Cytochrome c oxidase subunit 7C, mitochondrial OS=Mus musculus GN=Cox7c PE=1 SV=1 - [COX7C_MOUSE]	P17665	4	4	46.03	46.03	0.677	0.872	17.3	4.2
8	Cytochrome c oxidase subunit 7A2, mitochondrial OS=Mus musculus GN=Cox7a2 PE=1 SV=2 - [CX7A2_MOUSE]	P48771	4	3	59.04	38.55	0.692	1.003	9.4	2.9
9	Clathrin light chain A OS=Mus musculus GN=Clta PE=2 SV=2 - [CLCA_MOUSE]	O08585	8	11	26.81	31.06	0.699	0.893	11.4	3.6
10	SH3 domain-binding glutamic acid-rich-like protein 3 OS=Mus musculus GN=Sh3bgrl3 PE=1 SV=1 - [SH3L3_MOUSE]	Q91VW3	5	5	56.99	53.76	0.701	0.751	6.6	7.8
11	Mitochondrial fission 1 protein OS=Mus musculus GN=Fis1 PE=1 SV=1 - [FIS1_MOUSE]	Q9CQ92	2	3	15.79	24.34	0.706	0.974	2.5	1.1
12	Synaptogyrin-1 OS=Mus musculus GN=Syngr1 PE=1 SV=2 - [SNG1_MOUSE]	O55100	3	4	13.25	28.63	0.711	0.901	4.9	3.6
13	F-box only protein 41 OS=Mus musculus GN=Fbxo41 PE=1 SV=3 - [FBX41_MOUSE]	Q6NS60	5	6	4.12	4.93	0.735	1.08	6.6	3.8
14	Neurogranin OS=Mus musculus GN=Nrgn PE=1 SV=1 - [NEUG_MOUSE]	P60761	3	3	26.92	26.92	0.735	0.774	3.4	1.7
15	Cytochrome c oxidase subunit 5A, mitochondrial OS=Mus musculus GN=Cox5a PE=1 SV=2 - [COX5A_MOUSE]	P12787	10	9	63.7	59.59	0.746	1.047	1.3	2.4
16	Dynein light chain 2, cytoplasmic OS=Mus musculus GN=Dynll2 PE=1 SV=1 - [DYL2_MOUSE]	Q9D0M5	4	5	19.1	20.22	0.753	0.756	3.9	12.4
17	NEDD8 OS=Mus musculus GN=Nedd8 PE=1 SV=2 - [NEDD8_MOUSE]	P29595	4	7	45.68	79.01	0.755	0.833	10.3	5.2
18	Acyl-CoA-binding protein OS=Mus musculus GN=Dbi PE=1 SV=2 - [ACBP_MOUSE]	P31786	9	12	68.97	78.16	0.761	0.97	4.8	0.4
19	ATPase inhibitor, mitochondrial OS=Mus musculus GN=Atpif1 PE=2 SV=2 - [ATIF1_MOUSE]	O35143	10	13	48.11	50	0.763	1.074	1.2	1.5
20	Astrocytic phosphoprotein PEA-15 OS=Mus musculus GN=Pea15 PE=1 SV=1 - [PEA15_MOUSE]	Q62048	5	6	32.31	45.38	0.772	0.91	5.8	2.6
21	14-3-3 protein epsilon OS=Mus musculus GN=Ywhae PE=1 SV=1 - [1433E_MOUSE]	P62259	19	20	65.1	68.24	0.772	0.865	3.3	1.9
22	ATP synthase subunit e, mitochondrial OS=Mus musculus GN=Atp5i PE=1 SV=2 - [ATP5I_MOUSE]	Q06185	11	6	85.92	67.61	0.786	1.013	2.7	2.2
23	Neuromodulin OS=Mus musculus GN=Gap43 PE=1 SV=1 - [NEUM_MOUSE]	P06837	11	20	65.2	84.14	0.79	0.72	1	2.6
24	NADH dehydrogenase [ubiquinone] 1 beta subcomplex subunit 5, mitochondrial OS=Mus musculus GN=Ndufb5 PE=1 SV=1 - [NDUB5_MOUSE]	Q9CQH3	4	6	25.4	25.4	0.793	1.102	2.8	4
25	Superoxide dismutase [Cu-Zn] OS=Mus musculus GN=Sod1 PE=1 SV=2 - [SODC_MOUSE]	P08228	10	10	57.14	52.6	0.795	0.807	3.8	4.5
26	Annexin A5 OS=Mus musculus GN=Anxa5 PE=1 SV=1 - [ANXA5_MOUSE]	P48036	11	11	35.11	38.24	0.8	0.916	2.9	0.9
27	Phosphatidylethanolamine-binding protein 1 OS=Mus musculus GN=Pebp1 PE=1 SV=3 - [PEBP1_MOUSE]	P70296	5	8	44.92	52.41	0.8	0.825	3.4	1
28	Brain acid soluble protein 1 OS=Mus musculus GN=Basp1 PE=1 SV=3 - [BASP1_MOUSE]	Q91XV3	18	28	86.28	94.25	0.801	0.636	4.3	1.1
29	Glycolipid transfer protein OS=Mus musculus GN=Gltp PE=2 SV=3 - [GLTP_MOUSE]	Q9JL62	3	5	13.4	20.1	0.804	0.644	11.4	2.2
30	Clathrin light chain B OS=Mus musculus GN=Cltb PE=2 SV=1 - [CLCB_MOUSE]	Q6IRU5	10	11	38.43	38.43	0.804	0.81	2.3	1.4
31	S-phase kinase-associated protein 1 OS=Mus musculus GN=Skp1 PE=1 SV=3 - [SKP1_MOUSE]	Q9WTX5	3	6	16.56	26.99	0.805	0.81	6.5	2.2
32	Breast carcinoma-amplified sequence 1 homolog OS=Mus musculus GN=Bcas1 PE=2 SV=3 - [BCAS1_MOUSE]	Q80YN3	15	21	19.75	23.22	0.806	0.632	2.5	1.1
33	Tropomyosin alpha-1 chain OS=Mus musculus GN=Tpm1 PE=1 SV=1 - [TPM1_MOUSE]	P58771	13	22	33.45	50	0.806	0.867	2.5	2.8
34	14-3-3 protein eta OS=Mus musculus GN=Ywhah PE=1 SV=2 - [1433F_MOUSE]	P68510	18	20	57.32	62.2	0.807	0.87	3.4	3.5
35	ATP synthase protein 8 OS=Mus musculus GN=Mtatp8 PE=1 SV=1 - [ATP8_MOUSE]	P03930	3	4	32.84	35.82	0.809	1.019	9.6	9.6
36	14-3-3 protein beta/alpha OS=Mus musculus GN=Ywhab PE=1 SV=3 - [1433B_MOUSE]	Q9CQV8	20	20	65.85	65.85	0.81	0.873	3.4	2.6
37	14-3-3 protein zeta/delta OS=Mus musculus GN=Ywhaz PE=1 SV=1 - [1433Z_MOUSE]	P63101	26	25	72.65	73.47	0.813	0.804	2.5	1.7
38	Coactosin-like protein OS=Mus musculus GN=Cotl1 PE=1 SV=3 - [COTL1_MOUSE]	Q9CQI6	5	6	34.51	38.03	0.813	0.911	4.4	4.1
39	Charged multivesicular body protein 6 OS=Mus musculus GN=Chmp6 PE=2 SV=2 - [CHMP6_MOUSE]	P0C0A3	2	3	9.5	13	0.815	0.96	5.7	5.8
40	Hippocalcin-like protein 4 OS=Mus musculus GN=Hpcal4 PE=2 SV=3 - [HPCL4_MOUSE]	Q8BGZ1	8	8	38.22	41.36	0.818	0.788	1.8	0.7
41	CDP-diacylglycerol--inositol 3-phosphatidyltransferase OS=Mus musculus GN=Cdipt PE=1 SV=1 - [CDIPT_MOUSE]	Q8VDP6	2	3	11.27	15.96	0.82	0.945	12.9	9.3
42	Small VCP/p97-interacting protein OS=Mus musculus GN=Svip PE=2 SV=1 - [SVIP_MOUSE]	Q3UZP4	3	4	38.96	48.05	0.824	0.761	7.8	10.5
43	ATP synthase subunit epsilon, mitochondrial OS=Mus musculus GN=Atp5e PE=1 SV=2 - [ATP5E_MOUSE]	P56382	5	5	63.46	63.46	0.825	1.217	3.1	1.6
44	Paralemmin-1 OS=Mus musculus GN=Palm PE=1 SV=1 - [PALM_MOUSE]	Q9Z0P4	18	24	35.25	56.14	0.826	0.971	3	1.4
45	ATP synthase subunit g, mitochondrial OS=Mus musculus GN=Atp5l PE=1 SV=1 - [ATP5L_MOUSE]	Q9CPQ8	10	9	89.32	83.5	0.827	1.073	1.7	2.4
46	Glia maturation factor beta OS=Mus musculus GN=Gmfb PE=1 SV=3 - [GMFB_MOUSE]	Q9CQI3	3	3	16.9	30.28	0.83	0.838	10.9	2.3
47	Cofilin-1 OS=Mus musculus GN=Cfl1 PE=1 SV=3 - [COF1_MOUSE]	P18760	9	10	56.02	56.02	0.831	0.835	4.7	2.2
48	Cytochrome c oxidase subunit 6B1 OS=Mus musculus GN=Cox6b1 PE=1 SV=2 - [CX6B1_MOUSE]	P56391	4	6	34.88	34.88	0.832	1.275	5.5	2.7
49	Microtubule-associated protein tau OS=Mus musculus GN=Mapt PE=1 SV=3 - [TAU_MOUSE]	P10637	33	30	28.92	30.01	0.832	0.823	1	3.9
50	Destrin OS=Mus musculus GN=Dstn PE=1 SV=3 - [DEST_MOUSE]	Q9R0P5	4	4	24.85	29.09	0.833	0.972	4.9	6
51	Alpha-synuclein OS=Mus musculus GN=Snca PE=1 SV=2 - [SYUA_MOUSE]	O55042	14	12	62.14	62.14	0.836	0.528	4.2	3.7
52	2',3'-cyclic-nucleotide 3'-phosphodiesterase OS=Mus musculus GN=Cnp PE=1 SV=3 - [CN37_MOUSE]	P16330	45	42	68.57	68.57	0.837	0.839	1.7	2
53	Ras-related protein Rap-2b OS=Mus musculus GN=Rap2b PE=1 SV=1 - [RAP2B_MOUSE]	P61226	6	10	34.43	37.16	0.837	1.041	5.8	5.9
54	Oligodendrocyte-myelin glycoprotein OS=Mus musculus GN=Omg PE=1 SV=1 - [OMGP_MOUSE]	Q63912	8	9	15	16.36	0.84	0.921	5.6	2.2
55	Uncharacterized protein C1orf198 homolog OS=Mus musculus PE=2 SV=1 - [CA198_MOUSE]	Q8C3W1	3	3	9.63	12.42	0.842	0.994	11.5	3.8
56	Visinin-like protein 1 OS=Mus musculus GN=Vsnl1 PE=1 SV=2 - [VISL1_MOUSE]	P62761	10	14	48.69	69.63	0.842	0.85	2.2	1.3
57	Beta-synuclein OS=Mus musculus GN=Sncb PE=1 SV=1 - [SYUB_MOUSE]	Q91ZZ3	10	9	58.65	58.65	0.843	0.636	6.1	3.4
58	Ras-related protein Rab-35 OS=Mus musculus GN=Rab35 PE=1 SV=1 - [RAB35_MOUSE]	Q6PHN9	9	12	33.33	47.26	0.844	1.005	2.5	1.6
59	Ras-related protein Rab-6A OS=Mus musculus GN=Rab6a PE=1 SV=4 - [RAB6A_MOUSE]	P35279	12	14	49.52	63.46	0.845	0.95	5.2	1
60	Tubulin polymerization-promoting protein family member 3 OS=Mus musculus GN=Tppp3 PE=1 SV=1 - [TPPP3_MOUSE]	Q9CRB6	6	11	35.8	52.84	0.848	0.633	5.9	7.9
61	Alpha-endosulfine OS=Mus musculus GN=Ensa PE=1 SV=1 - [ENSA_MOUSE]	P60840	5	7	52.07	52.07	0.849	0.758	3.9	2.7
62	AP-2 complex subunit sigma OS=Mus musculus GN=Ap2s1 PE=1 SV=1 - [AP2S1_MOUSE]	P62743	4	5	21.13	35.92	0.849	0.911	19.1	5.6
63	Stathmin OS=Mus musculus GN=Stmn1 PE=1 SV=2 - [STMN1_MOUSE]	P54227	9	20	53.02	79.87	0.853	0.769	5.1	3.4
64	Peptidyl-prolyl cis-trans isomerase FKBP2 OS=Mus musculus GN=Fkbp2 PE=1 SV=1 - [FKBP2_MOUSE]	P45878	3	6	14.29	28.57	0.856	0.92	2.6	1
65	Ras-related protein Rab-1B OS=Mus musculus GN=Rab1b PE=1 SV=1 - [RAB1B_MOUSE]	Q9D1G1	12	12	54.73	53.23	0.856	1.007	7.4	4.5
66	Reticulocalbin-2 OS=Mus musculus GN=Rcn2 PE=2 SV=1 - [RCN2_MOUSE]	Q8BP92	9	10	37.19	31.56	0.856	1.082	8.9	3.6
67	Voltage-dependent calcium channel subunit alpha-2/delta-1 OS=Mus musculus GN=Cacna2d1 PE=1 SV=1 - [CA2D1_MOUSE]	O08532	11	21	9.97	23.39	0.857	0.988	1.8	1.1
68	Myelin proteolipid protein OS=Mus musculus GN=Plp1 PE=1 SV=2 - [MYPR_MOUSE]	P60202	5	6	14.8	20.22	0.859	0.636	1.2	3
69	Tubulin polymerization-promoting protein OS=Mus musculus GN=Tppp PE=1 SV=1 - [TPPP_MOUSE]	Q7TQD2	24	18	77.52	71.1	0.859	0.789	5	2
70	Tropomyosin alpha-3 chain OS=Mus musculus GN=Tpm3 PE=1 SV=3 - [TPM3_MOUSE]	P21107	14	26	35.44	55.44	0.859	0.875	5.1	3.6
71	ERC protein 2 OS=Mus musculus GN=Erc2 PE=2 SV=2 - [ERC2_MOUSE]	Q6PH08	19	33	16.61	29.47	0.859	1.053	2.4	0.9
72	Fatty acid-binding protein, heart OS=Mus musculus GN=Fabp3 PE=1 SV=5 - [FABPH_MOUSE]	P11404	6	9	30.83	54.14	0.859	0.77	3.2	1.4
73	NADH dehydrogenase [ubiquinone] iron-sulfur protein 5 OS=Mus musculus GN=Ndufs5 PE=1 SV=3 - [NDUS5_MOUSE]	Q99LY9	6	2	37.74	17.92	0.862	1.142	8	11.1
74	Sodium/potassium-transporting ATPase subunit beta-2 OS=Mus musculus GN=Atp1b2 PE=1 SV=2 - [AT1B2_MOUSE]	P14231	6	8	25.17	32.07	0.864	1.084	2.4	2.3
75	Gelsolin OS=Mus musculus GN=Gsn PE=1 SV=3 - [GELS_MOUSE]	P13020	2	5	1.54	7.18	0.864	0.95		2
76	60S ribosomal protein L6 OS=Mus musculus GN=Rpl6 PE=1 SV=3 - [RL6_MOUSE]	P47911	9	12	23.65	31.08	0.865	1.171	1.8	2.9
77	Syntaxin-1B OS=Mus musculus GN=Stx1b PE=1 SV=1 - [STX1B_MOUSE]	P61264	21	24	62.15	58.33	0.865	0.987	0.7	1.2
78	Limbic system-associated membrane protein OS=Mus musculus GN=Lsamp PE=1 SV=1 - [LSAMP_MOUSE]	Q8BLK3	14	12	35.19	32.26	0.865	1.042	3.2	0.4
79	14-3-3 protein gamma OS=Mus musculus GN=Ywhag PE=1 SV=2 - [1433G_MOUSE]	P61982	21	20	64.78	64.78	0.867	0.845	3.2	3.2
80	LIM zinc-binding domain-containing Nebulette OS=Mus musculus GN=Nebl PE=2 SV=1 - [LNEBL_MOUSE]	Q9DC07	4	6	15.56	23.7	0.87	0.866	3.7	2.4
81	Eukaryotic translation initiation factor 4H OS=Mus musculus GN=Eif4h PE=1 SV=3 - [IF4H_MOUSE]	Q9WUK2	5	7	22.58	29.44	0.87	0.862	2.9	4.9
82	Neuronal membrane glycoprotein M6-b OS=Mus musculus GN=Gpm6b PE=1 SV=2 - [GPM6B_MOUSE]	P35803	7	9	21.95	25.91	0.871	0.944	1.9	4.1
83	Leucine-rich repeat and immunoglobulin-like domain-containing nogo receptor-interacting protein 1 OS=Mus musculus GN=Lingo1 PE=1 SV=1 - [LIGO1_MOUSE]	Q9D1T0	6	12	9.93	19.54	0.874	1.037	2.2	1.6
84	Keratin, type II cytoskeletal 5 OS=Mus musculus GN=Krt5 PE=1 SV=1 - [K2C5_MOUSE]	Q922U2	4	10	5.69	12.24	0.874	0.421	4.5	13.9
85	Cytochrome c oxidase subunit 5B, mitochondrial OS=Mus musculus GN=Cox5b PE=1 SV=1 - [COX5B_MOUSE]	P19536	6	7	35.94	35.94	0.874	1.106	3.3	1
86	Glutamate receptor 3 OS=Mus musculus GN=Gria3 PE=1 SV=2 - [GRIA3_MOUSE]	Q9Z2W9	11	18	14.19	22.97	0.875	1.092	0.8	4.8
87	Sodium/potassium-transporting ATPase subunit beta-3 OS=Mus musculus GN=Atp1b3 PE=1 SV=1 - [AT1B3_MOUSE]	P97370	2	3	5.76	10.79	0.876	0.947	4.2	3.4
88	Complexin-1 OS=Mus musculus GN=Cplx1 PE=1 SV=1 - [CPLX1_MOUSE]	P63040	7	7	44.03	46.27	0.876	0.911	3.4	2.1
89	60S ribosomal protein L14 OS=Mus musculus GN=Rpl14 PE=2 SV=3 - [RL14_MOUSE]	Q9CR57	7	7	24.88	21.2	0.876	1.091	3.3	2.5
90	Peptidyl-prolyl cis-trans isomerase A OS=Mus musculus GN=Ppia PE=1 SV=2 - [PPIA_MOUSE]	P17742	16	13	57.93	54.27	0.876	0.849	0.7	0.9
91	NADH dehydrogenase [ubiquinone] iron-sulfur protein 6, mitochondrial OS=Mus musculus GN=Ndufs6 PE=1 SV=2 - [NDUS6_MOUSE]	P52503	5	6	41.38	41.38	0.876	1.07	9.6	1.8
92	Neuroplastin OS=Mus musculus GN=Nptn PE=1 SV=3 - [NPTN_MOUSE]	P97300	11	14	23.43	28.72	0.877	1.075	1.4	1.4
93	Calcineurin subunit B type 1 OS=Mus musculus GN=Ppp3r1 PE=1 SV=3 - [CANB1_MOUSE]	Q63810	5	6	54.12	61.18	0.877	0.893	4.2	2.1
94	Non-specific lipid-transfer protein OS=Mus musculus GN=Scp2 PE=1 SV=3 - [NLTP_MOUSE]	P32020	7	9	9.87	12.43	0.877	1.052	4.6	1.5
95	NADH dehydrogenase [ubiquinone] iron-sulfur protein 4, mitochondrial OS=Mus musculus GN=Ndufs4 PE=1 SV=3 - [NDUS4_MOUSE]	Q9CXZ1	9	9	38.29	39.43	0.877	1.106	5.2	2.3
96	Glutamate receptor ionotropic, NMDA 2B OS=Mus musculus GN=Grin2b PE=1 SV=3 - [NMDE2_MOUSE]	Q01097	12	14	7.49	8.5	0.877	1.114	2.8	3.5
97	Excitatory amino acid transporter 2 OS=Mus musculus GN=Slc1a2 PE=1 SV=1 - [EAA2_MOUSE]	P43006	22	23	39.34	40.38	0.877	1.051	1.7	0.9
98	CD166 antigen OS=Mus musculus GN=Alcam PE=1 SV=3 - [CD166_MOUSE]	Q61490	7	14	14.92	22.13	0.878	1.028	2.6	2.1
99	39S ribosomal protein L12, mitochondrial OS=Mus musculus GN=Mrpl12 PE=1 SV=2 - [RM12_MOUSE]	Q9DB15	4	3	20.9	24.88	0.878	1.009	1.8	4.6
100	EF-hand domain-containing protein D2 OS=Mus musculus GN=Efhd2 PE=1 SV=1 - [EFHD2_MOUSE]	Q9D8Y0	7	8	26.67	31.67	0.878	0.86	9	2.1
101	Cadherin-2 OS=Mus musculus GN=Cdh2 PE=1 SV=2 - [CADH2_MOUSE]	P15116	6	9	8.28	13.58	0.879	1.051	2.9	1.8
102	Actin-related protein 2/3 complex subunit 4 OS=Mus musculus GN=Arpc4 PE=1 SV=3 - [ARPC4_MOUSE]	P59999	8	8	36.9	49.4	0.879	0.871	3.1	0.4
103	Teneurin-3 OS=Mus musculus GN=Tenm3 PE=1 SV=1 - [TEN3_MOUSE]	Q9WTS6	3	3	0.7	0.7	0.88	0.999	3	2.9
104	Dynactin subunit 1 OS=Mus musculus GN=Dctn1 PE=1 SV=3 - [DCTN1_MOUSE]	O08788	6	13	4.76	12.1	0.88	1.023	25.9	1.7
105	Ras-related protein Rab-10 OS=Mus musculus GN=Rab10 PE=1 SV=1 - [RAB10_MOUSE]	P61027	12	14	46.5	53.5	0.881	0.979	1.2	1.5
106	NADH dehydrogenase [ubiquinone] iron-sulfur protein 8, mitochondrial OS=Mus musculus GN=Ndufs8 PE=1 SV=1 - [NDUS8_MOUSE]	Q8K3J1	9	6	29.72	26.42	0.881	1.156	2.7	1.9
107	Eukaryotic translation initiation factor 4B OS=Mus musculus GN=Eif4b PE=1 SV=1 - [IF4B_MOUSE]	Q8BGD9	7	4	15.06	8.18	0.881	0.736	5	3
108	V-type proton ATPase subunit F OS=Mus musculus GN=Atp6v1f PE=1 SV=2 - [VATF_MOUSE]	Q9D1K2	9	8	83.19	70.59	0.881	0.954	1.8	3.9
109	Contactin-associated protein-like 2 OS=Mus musculus GN=Cntnap2 PE=1 SV=2 - [CNTP2_MOUSE]	Q9CPW0	9	14	5.33	10.36	0.882	1.05	4.5	1.3
110	Protein FAM136A OS=Mus musculus GN=Fam136a PE=2 SV=1 - [F136A_MOUSE]	Q9CR98	3	4	18.12	22.46	0.882	1.057	6.6	6.2
111	ATP synthase subunit delta, mitochondrial OS=Mus musculus GN=Atp5d PE=1 SV=1 - [ATPD_MOUSE]	Q9D3D9	7	5	44.05	44.05	0.884	1.011	1.7	1.5
112	Neurocan core protein OS=Mus musculus GN=Ncan PE=2 SV=1 - [NCAN_MOUSE]	P55066	10	8	5.91	4.89	0.884	1.003	3.6	2
113	14-3-3 protein theta OS=Mus musculus GN=Ywhaq PE=1 SV=1 - [1433T_MOUSE]	P68254	14	17	46.12	51.84	0.886	0.831	11.3	1.7
114	UMP-CMP kinase OS=Mus musculus GN=Cmpk1 PE=1 SV=1 - [KCY_MOUSE]	Q9DBP5	4	5	19.39	24.49	0.887	0.884	8	2.1
115	Cytochrome c oxidase subunit 2 OS=Mus musculus GN=Mtco2 PE=1 SV=1 - [COX2_MOUSE]	P00405	7	7	30.84	30.84	0.887	1.094	1.6	2.1
116	Cell adhesion molecule 4 OS=Mus musculus GN=Cadm4 PE=1 SV=1 - [CADM4_MOUSE]	Q8R464	6	7	19.07	20.1	0.887	0.988	1.3	0.3
117	Cytochrome b-c1 complex subunit 8 OS=Mus musculus GN=Uqcrq PE=1 SV=3 - [QCR8_MOUSE]	Q9CQ69	10	9	87.8	86.59	0.888	1.05	3.8	1.6
118	40S ribosomal protein S23 OS=Mus musculus GN=Rps23 PE=2 SV=3 - [RS23_MOUSE]	P62267	5	4	23.08	20.98	0.888	1.07	2.1	1.8
119	Myelin-oligodendrocyte glycoprotein OS=Mus musculus GN=Mog PE=1 SV=1 - [MOG_MOUSE]	Q61885	14	15	38.21	38.62	0.893	0.805	0.5	2
120	Latrophilin-1 OS=Mus musculus GN=Lphn1 PE=1 SV=2 - [LPHN1_MOUSE]	Q80TR1	6	6	4.23	3.62	0.893	0.998	3.7	1.9
121	Disks large-associated protein 3 OS=Mus musculus GN=Dlgap3 PE=1 SV=1 - [DLGP3_MOUSE]	Q6PFD5	11	17	10.34	16.38	0.893	1.043	1.5	1.7
122	Voltage-dependent anion-selective channel protein 2 OS=Mus musculus GN=Vdac2 PE=1 SV=2 - [VDAC2_MOUSE]	Q60930	12	11	36.61	33.56	0.893	1.161	2.6	0.9
123	Myristoylated alanine-rich C-kinase substrate OS=Mus musculus GN=Marcks PE=1 SV=2 - [MARCS_MOUSE]	P26645	3	9	13.27	34.63	0.894	0.613	11.9	8
124	Rho-related GTP-binding protein RhoG OS=Mus musculus GN=Rhog PE=2 SV=1 - [RHOG_MOUSE]	P84096	5	8	35.08	42.41	0.895	0.955	7.2	2.8
125	Hsc70-interacting protein OS=Mus musculus GN=St13 PE=2 SV=1 - [F10A1_MOUSE]	Q99L47	8	12	15.63	27.76	0.895	0.827	2.7	4.2
126	Mitochondrial import inner membrane translocase subunit Tim10 OS=Mus musculus GN=Timm10 PE=1 SV=1 - [TIM10_MOUSE]	P62073	4	3	32.22	24.44	0.896	1.193	20.5	2.7
127	Cytochrome b-c1 complex subunit 7 OS=Mus musculus GN=Uqcrb PE=1 SV=3 - [QCR7_MOUSE]	Q9D855	11	10	61.26	72.97	0.896	1.189	2.7	2.5
128	Sodium- and chloride-dependent GABA transporter 3 OS=Mus musculus GN=Slc6a11 PE=1 SV=2 - [S6A11_MOUSE]	P31650	12	10	14.67	14.35	0.897	0.984	2.7	2
129	NADH dehydrogenase [ubiquinone] 1 alpha subcomplex subunit 3 OS=Mus musculus GN=Ndufa3 PE=1 SV=1 - [NDUA3_MOUSE]	Q9CQ91	3	3	57.14	57.14	0.897	1.136	1.9	3.2
130	Growth factor receptor-bound protein 2 OS=Mus musculus GN=Grb2 PE=1 SV=1 - [GRB2_MOUSE]	Q60631	2	8	10.6	34.1	0.898	0.84		6
131	Neurofascin OS=Mus musculus GN=Nfasc PE=1 SV=1 - [NFASC_MOUSE]	Q810U3	26	34	23.06	25.48	0.898	1.034	1.5	0.6
132	Ras-related protein Rab-6B OS=Mus musculus GN=Rab6b PE=1 SV=1 - [RAB6B_MOUSE]	P61294	11	11	50.96	58.17	0.899	0.991	5.8	5.7
133	A-kinase anchor protein 5 OS=Mus musculus GN=Akap5 PE=1 SV=2 - [AKAP5_MOUSE]	D3YVF0	6	7	16.64	24.03	0.899	0.916	3.9	3.4
134	Rho GTPase-activating protein 39 OS=Mus musculus GN=Arhgap39 PE=1 SV=2 - [RHG39_MOUSE]	P59281	5	6	4.07	5.15	0.901	1.006	2.1	3.6
135	Voltage-dependent calcium channel gamma-8 subunit OS=Mus musculus GN=Cacng8 PE=1 SV=1 - [CCG8_MOUSE]	Q8VHW2	9	9	29.31	29.31	0.901	1.075	3.2	0.5
136	Neuronal membrane glycoprotein M6-a OS=Mus musculus GN=Gpm6a PE=1 SV=1 - [GPM6A_MOUSE]	P35802	8	9	16.55	22.3	0.901	0.834	0.8	8.5
137	Protein EFR3 homolog B OS=Mus musculus GN=Efr3b PE=2 SV=2 - [EFR3B_MOUSE]	Q6ZQ18	5	5	6.24	6.36	0.902	1.012	5.8	3.4
138	Neutral amino acid transporter A OS=Mus musculus GN=Slc1a4 PE=1 SV=1 - [SATT_MOUSE]	O35874	3	2	5.08	3.57	0.902	0.878	1.3	5.1
139	Metabotropic glutamate receptor 2 OS=Mus musculus GN=Grm2 PE=1 SV=2 - [GRM2_MOUSE]	Q14BI2	6	7	6.54	7.57	0.902	1.139	3.1	3.4
140	Ras-related protein Rab-15 OS=Mus musculus GN=Rab15 PE=1 SV=1 - [RAB15_MOUSE]	Q8K386	4	4	21.23	21.23	0.902	0.999	2	1.1
141	Excitatory amino acid transporter 1 OS=Mus musculus GN=Slc1a3 PE=1 SV=2 - [EAA1_MOUSE]	P56564	17	18	33.15	30.76	0.902	1.075	2.3	7.1
142	Eukaryotic translation initiation factor 5A-1 OS=Mus musculus GN=Eif5a PE=1 SV=2 - [IF5A1_MOUSE]	P63242	5	5	21.43	24.03	0.902	0.856	2.2	4.7
143	Glucose-6-phosphate 1-dehydrogenase X OS=Mus musculus GN=G6pdx PE=1 SV=3 - [G6PD1_MOUSE]	Q00612	3	4	4.85	8.74	0.903	0.943	2.4	10
144	Solute carrier family 12 member 2 OS=Mus musculus GN=Slc12a2 PE=1 SV=2 - [S12A2_MOUSE]	P55012	10	16	11.12	14.85	0.904	0.96	1.3	2.6
145	Gamma-aminobutyric acid type B receptor subunit 1 OS=Mus musculus GN=Gabbr1 PE=1 SV=1 - [GABR1_MOUSE]	Q9WV18	5	6	4.9	4.69	0.904	1.01	2.1	4.6
146	Receptor-type tyrosine-protein phosphatase S OS=Mus musculus GN=Ptprs PE=1 SV=1 - [PTPRS_MOUSE]	B0V2N1	6	13	3.67	8.23	0.904	1.094	3	3.2
147	Glutamate receptor ionotropic, NMDA 1 OS=Mus musculus GN=Grin1 PE=1 SV=1 - [NMDZ1_MOUSE]	P35438	21	19	20.04	16.1	0.904	1.099	2.5	0.6
148	Actin-related protein 2/3 complex subunit 5 OS=Mus musculus GN=Arpc5 PE=2 SV=3 - [ARPC5_MOUSE]	Q9CPW4	6	7	43.71	52.32	0.905	0.861	5.2	1
149	Voltage-dependent anion-selective channel protein 1 OS=Mus musculus GN=Vdac1 PE=1 SV=3 - [VDAC1_MOUSE]	Q60932	21	20	73.99	71.96	0.905	1.148	1.3	0.3
150	Drebrin OS=Mus musculus GN=Dbn1 PE=1 SV=4 - [DREB_MOUSE]	Q9QXS6	2	6	3.4	9.63	0.905	1.005	11.9	3.4
151	Gamma-aminobutyric acid receptor subunit alpha-1 OS=Mus musculus GN=Gabra1 PE=1 SV=1 - [GBRA1_MOUSE]	P62812	9	13	19.78	23.74	0.906	1.111	1.3	2.1
152	Ran-specific GTPase-activating protein OS=Mus musculus GN=Ranbp1 PE=1 SV=2 - [RANG_MOUSE]	P34022	2	7	10.84	24.63	0.906	0.824	7.2	1.8
153	Transcription factor A, mitochondrial OS=Mus musculus GN=Tfam PE=1 SV=2 - [TFAM_MOUSE]	P40630	8	8	32.1	29.63	0.906	1.19	1.5	5.4
154	Secernin-1 OS=Mus musculus GN=Scrn1 PE=1 SV=1 - [SCRN1_MOUSE]	Q9CZC8	3	4	6.52	9.66	0.906	0.934	6.1	1.9
155	Sodium/potassium-transporting ATPase subunit alpha-3 OS=Mus musculus GN=Atp1a3 PE=1 SV=1 - [AT1A3_MOUSE]	Q6PIC6	62	59	50.84	50.94	0.907	0.972	1.5	0.7
156	4F2 cell-surface antigen heavy chain OS=Mus musculus GN=Slc3a2 PE=1 SV=1 - [4F2_MOUSE]	P10852	20	27	36.12	50	0.907	1.058	1.8	2
157	Syntaxin-1A OS=Mus musculus GN=Stx1a PE=1 SV=3 - [STX1A_MOUSE]	O35526	11	24	28.13	71.18	0.907	1.043	1.6	1.3
158	Oxidation resistance protein 1 OS=Mus musculus GN=Oxr1 PE=2 SV=3 - [OXR1_MOUSE]	Q4KMM3	11	25	15.13	32.91	0.908	1.011	2.3	1.4
159	60S ribosomal protein L26 OS=Mus musculus GN=Rpl26 PE=2 SV=1 - [RL26_MOUSE]	P61255	6	5	31.03	26.21	0.908	1.063	3.5	3.6
160	Calcineurin B homologous protein 1 OS=Mus musculus GN=Chp1 PE=1 SV=2 - [CHP1_MOUSE]	P61022	3	4	20	28.72	0.908	0.977	5.2	1.5
161	Na(+)/H(+) exchange regulatory cofactor NHE-RF1 OS=Mus musculus GN=Slc9a3r1 PE=1 SV=3 - [NHRF1_MOUSE]	P70441	14	19	45.63	58.03	0.909	0.834	1.7	0.9
162	Leukocyte elastase inhibitor A OS=Mus musculus GN=Serpinb1a PE=1 SV=1 - [ILEUA_MOUSE]	Q9D154	8	9	20.32	20.32	0.909	0.903	3	0.5
163	Disks large-associated protein 4 OS=Mus musculus GN=Dlgap4 PE=1 SV=1 - [DLGP4_MOUSE]	B1AZP2	7	7	4.64	5.65	0.909	1.089	5.8	4.9
164	Inositol monophosphatase 1 OS=Mus musculus GN=Impa1 PE=1 SV=1 - [IMPA1_MOUSE]	O55023	3	4	13.72	16.61	0.91	0.963	3.7	6.9
165	Potassium/sodium hyperpolarization-activated cyclic nucleotide-gated channel 1 OS=Mus musculus GN=Hcn1 PE=1 SV=1 - [HCN1_MOUSE]	O88704	4	8	4.29	7.91	0.91	1.027	0.7	1.5
166	G protein-regulated inducer of neurite outgrowth 1 OS=Mus musculus GN=Gprin1 PE=1 SV=2 - [GRIN1_MOUSE]	Q3UNH4	26	55	32.94	56.65	0.91	0.929	3.3	0.5
167	Glutamate receptor 2 OS=Mus musculus GN=Gria2 PE=1 SV=3 - [GRIA2_MOUSE]	P23819	24	35	28.77	44.62	0.911	1.129	0.6	0.8
168	Electrogenic sodium bicarbonate cotransporter 1 OS=Mus musculus GN=Slc4a4 PE=1 SV=2 - [S4A4_MOUSE]	O88343	20	20	21.59	23.35	0.911	1.038	3.1	1.4
169	Proline-rich transmembrane protein 2 OS=Mus musculus GN=Prrt2 PE=1 SV=1 - [PRRT2_MOUSE]	E9PUL5	7	11	23.7	41.62	0.912	0.981	2.2	0.7
170	Intercellular adhesion molecule 5 OS=Mus musculus GN=Icam5 PE=1 SV=2 - [ICAM5_MOUSE]	Q60625	13	11	10.8	8.72	0.913	1.061	3.4	8.3
171	Myelin-associated glycoprotein OS=Mus musculus GN=Mag PE=1 SV=2 - [MAG_MOUSE]	P20917	13	14	23	28.27	0.913	0.903	0.2	2.5
172	Dihydropteridine reductase OS=Mus musculus GN=Qdpr PE=1 SV=2 - [DHPR_MOUSE]	Q8BVI4	7	9	34.44	34.44	0.913	0.976	2	0.7
173	Disintegrin and metalloproteinase domain-containing protein 22 OS=Mus musculus GN=Adam22 PE=1 SV=2 - [ADA22_MOUSE]	Q9R1V6	8	9	9.73	9.18	0.913	0.983	3	1.9
174	Neural cell adhesion molecule 1 OS=Mus musculus GN=Ncam1 PE=1 SV=3 - [NCAM1_MOUSE]	P13595	38	51	34.89	43.95	0.914	0.987	0.7	1
175	Sodium/potassium-transporting ATPase subunit alpha-1 OS=Mus musculus GN=Atp1a1 PE=1 SV=1 - [AT1A1_MOUSE]	Q8VDN2	53	56	50.34	47.7	0.914	0.974	0.7	0.6
176	Endophilin-A2 OS=Mus musculus GN=Sh3gl1 PE=1 SV=1 - [SH3G1_MOUSE]	Q62419	8	8	16.85	18.48	0.914	0.858	2.8	14
177	Profilin-2 OS=Mus musculus GN=Pfn2 PE=1 SV=3 - [PROF2_MOUSE]	Q9JJV2	6	7	37.14	50.71	0.915	0.913	1.5	2.8
178	Band 4.1-like protein 2 OS=Mus musculus GN=Epb41l2 PE=1 SV=2 - [E41L2_MOUSE]	O70318	23	29	22.57	29.15	0.915	0.987	1.2	1.9
179	Elongation factor 1-alpha 1 OS=Mus musculus GN=Eef1a1 PE=1 SV=3 - [EF1A1_MOUSE]	P10126	20	23	35.28	38.1	0.916	0.973	3.9	1.6
180	Microtubule-associated protein 4 OS=Mus musculus GN=Map4 PE=1 SV=3 - [MAP4_MOUSE]	P27546	13	19	12.98	18.67	0.916	0.962	1.6	3.7
181	Neural cell adhesion molecule 2 OS=Mus musculus GN=Ncam2 PE=2 SV=1 - [NCAM2_MOUSE]	O35136	9	14	9.44	16.13	0.916	0.942	1.4	2.6
182	Reticulon-1 OS=Mus musculus GN=Rtn1 PE=1 SV=1 - [RTN1_MOUSE]	Q8K0T0	15	12	24.36	16.67	0.916	0.884	1	10.5
183	Synaptosomal-associated protein 25 OS=Mus musculus GN=Snap25 PE=1 SV=1 - [SNP25_MOUSE]	P60879	19	19	76.7	72.82	0.917	0.997	2.5	0.8
184	Actin-related protein 2/3 complex subunit 3 OS=Mus musculus GN=Arpc3 PE=1 SV=3 - [ARPC3_MOUSE]	Q9JM76	6	4	32.02	21.35	0.917	0.995	3.7	0.8
185	Protein DJ-1 OS=Mus musculus GN=Park7 PE=1 SV=1 - [PARK7_MOUSE]	Q99LX0	10	8	53.44	53.44	0.917	0.907	1	3.7
186	Sodium/potassium-transporting ATPase subunit beta-1 OS=Mus musculus GN=Atp1b1 PE=1 SV=1 - [AT1B1_MOUSE]	P14094	17	21	40.46	36.51	0.917	0.971	0.7	2.1
187	Ras-related protein Rab-18 OS=Mus musculus GN=Rab18 PE=2 SV=2 - [RAB18_MOUSE]	P35293	7	8	28.64	36.89	0.918	1.03	1.8	4.1
188	Stress-induced-phosphoprotein 1 OS=Mus musculus GN=Stip1 PE=1 SV=1 - [STIP1_MOUSE]	Q60864	7	23	14.92	36.1	0.918	0.826	5.4	1.4
189	Peptidyl-prolyl cis-trans isomerase FKBP1A OS=Mus musculus GN=Fkbp1a PE=1 SV=2 - [FKB1A_MOUSE]	P26883	3	3	28.7	29.63	0.919	0.895	1.2	4.9
190	Regulating synaptic membrane exocytosis protein 1 OS=Mus musculus GN=Rims1 PE=1 SV=2 - [RIMS1_MOUSE]	Q99NE5	9	13	4.51	10.32	0.919	0.996	1.7	4.2
191	Tubulin beta-5 chain OS=Mus musculus GN=Tubb5 PE=1 SV=1 - [TBB5_MOUSE]	P99024	23	22	54.28	61.71	0.92	1.067	1.8	1.8
192	Contactin-1 OS=Mus musculus GN=Cntn1 PE=1 SV=1 - [CNTN1_MOUSE]	P12960	45	48	46.37	49.9	0.92	1.078	1.8	0.6
193	Purkinje cell protein 4 OS=Mus musculus GN=Pcp4 PE=2 SV=2 - [PCP4_MOUSE]	P63054	2	7	43.55	75.81	0.92	0.79	9.5	8.2
194	Cell division control protein 42 homolog OS=Mus musculus GN=Cdc42 PE=1 SV=2 - [CDC42_MOUSE]	P60766	4	5	26.7	25.65	0.92	0.971	5.4	2.8
195	Protein kinase C beta type OS=Mus musculus GN=Prkcb PE=1 SV=4 - [KPCB_MOUSE]	P68404	14	15	18.63	20.72	0.921	1.048	2.6	1.1
196	10 kDa heat shock protein, mitochondrial OS=Mus musculus GN=Hspe1 PE=1 SV=2 - [CH10_MOUSE]	Q64433	17	13	93.14	86.27	0.921	1.085	1.5	0.6
197	Plexin-A4 OS=Mus musculus GN=Plxna4 PE=1 SV=3 - [PLXA4_MOUSE]	Q80UG2	10	20	4.81	10.72	0.922	0.997	5.5	3.5
198	Glypican-1 OS=Mus musculus GN=Gpc1 PE=1 SV=1 - [GPC1_MOUSE]	Q9QZF2	6	7	16.16	20.11	0.923	1.015	6.3	3.6
199	Coiled-coil-helix-coiled-coil-helix domain-containing protein 3, mitochondrial OS=Mus musculus GN=Chchd3 PE=1 SV=1 - [CHCH3_MOUSE]	Q9CRB9	12	11	33.92	35.68	0.923	1.165	2.9	2.2
200	Peroxiredoxin-2 OS=Mus musculus GN=Prdx2 PE=1 SV=3 - [PRDX2_MOUSE]	Q61171	11	8	43.43	40.91	0.923	0.9	0.8	2.5
201	Contactin-2 OS=Mus musculus GN=Cntn2 PE=1 SV=2 - [CNTN2_MOUSE]	Q61330	3	7	2.31	7.69	0.923	1		1
202	Secretory carrier-associated membrane protein 4 OS=Mus musculus GN=Scamp4 PE=2 SV=1 - [SCAM4_MOUSE]	Q9JKV5	2	2	8.26	8.26	0.923	0.967	5.2	0.7
203	Immunoglobulin superfamily member 8 OS=Mus musculus GN=Igsf8 PE=1 SV=2 - [IGSF8_MOUSE]	Q8R366	12	14	24.22	27	0.923	1.026	2.6	2.5
204	Sodium channel protein type 9 subunit alpha OS=Mus musculus GN=Scn9a PE=1 SV=2 - [SCN9A_MOUSE]	Q62205	6	8	1.92	3.98	0.924	0.993	13.6	2
205	Leukocyte surface antigen CD47 OS=Mus musculus GN=Cd47 PE=1 SV=2 - [CD47_MOUSE]	Q61735	3	6	10.89	18.48	0.924	1.016	7.5	2.3
206	Protein bassoon OS=Mus musculus GN=Bsn PE=1 SV=4 - [BSN_MOUSE]	O88737	82	89	27.35	28.06	0.924	1.057	1	0.6
207	Sodium/calcium exchanger 1 OS=Mus musculus GN=Slc8a1 PE=1 SV=1 - [NAC1_MOUSE]	P70414	14	18	10.93	13.61	0.925	1.01	4.5	0.7
208	Glutamate receptor 1 OS=Mus musculus GN=Gria1 PE=1 SV=1 - [GRIA1_MOUSE]	P23818	23	31	26.02	32.3	0.925	1.044	2.1	3.1
209	Charged multivesicular body protein 4b OS=Mus musculus GN=Chmp4b PE=2 SV=2 - [CHM4B_MOUSE]	Q9D8B3	9	10	34.38	40.63	0.925	0.878	2.7	0.4
210	NADH dehydrogenase [ubiquinone] 1 alpha subcomplex subunit 2 OS=Mus musculus GN=Ndufa2 PE=1 SV=3 - [NDUA2_MOUSE]	Q9CQ75	10	9	65.66	65.66	0.926	1.246	4.2	3.5
211	Rabphilin-3A OS=Mus musculus GN=Rph3a PE=1 SV=2 - [RP3A_MOUSE]	P47708	10	15	23.64	30.54	0.926	0.958	3.9	4
212	Protein kinase C gamma type OS=Mus musculus GN=Prkcg PE=1 SV=1 - [KPCG_MOUSE]	P63318	27	24	37.02	35.58	0.926	1.126	0.7	1.1
213	Synaptotagmin-12 OS=Mus musculus GN=Syt12 PE=2 SV=1 - [SYT12_MOUSE]	Q920N7	4	6	8.79	14.01	0.926	0.963	5.4	1.4
214	Dipeptidyl aminopeptidase-like protein 6 OS=Mus musculus GN=Dpp6 PE=1 SV=1 - [DPP6_MOUSE]	Q9Z218	26	29	32.71	36.44	0.927	1.035	1.8	0.7
215	NADH dehydrogenase [ubiquinone] 1 alpha subcomplex subunit 5 OS=Mus musculus GN=Ndufa5 PE=1 SV=3 - [NDUA5_MOUSE]	Q9CPP6	7	8	61.21	65.52	0.927	1.163	2.5	0.6
216	Sodium/potassium-transporting ATPase subunit alpha-2 OS=Mus musculus GN=Atp1a2 PE=1 SV=1 - [AT1A2_MOUSE]	Q6PIE5	68	66	51.86	56.37	0.927	1.049	1.8	1.9
217	Basigin OS=Mus musculus GN=Bsg PE=1 SV=2 - [BASI_MOUSE]	P18572	5	8	14.14	25.19	0.927	0.949	5.5	3.5
218	IQ motif and SEC7 domain-containing protein 1 OS=Mus musculus GN=Iqsec1 PE=1 SV=2 - [IQEC1_MOUSE]	Q8R0S2	13	22	15.5	22.79	0.927	1.088	4.8	0.3
219	Glutamate receptor ionotropic, NMDA 2A OS=Mus musculus GN=Grin2a PE=1 SV=2 - [NMDE1_MOUSE]	P35436	6	10	4.58	8.06	0.927	1.088	1.9	6.8
220	UPF0556 protein C19orf10 homolog OS=Mus musculus GN=D17Wsu104e PE=2 SV=1 - [CS010_MOUSE]	Q9CPT4	3	4	18.07	24.7	0.927	1.034	2.4	3.9
221	Ras-related protein Rab-8B OS=Mus musculus GN=Rab8b PE=1 SV=1 - [RAB8B_MOUSE]	P61028	9	11	35.75	42.03	0.927	1.005	0.7	2.9
222	Protein FAM131B OS=Mus musculus GN=Fam131b PE=1 SV=1 - [F131B_MOUSE]	Q3TY60	3	3	12.95	8.13	0.928	0.986	0.9	6.5
223	Calcium/calmodulin-dependent protein kinase type II subunit alpha OS=Mus musculus GN=Camk2a PE=1 SV=2 - [KCC2A_MOUSE]	P11798	38	39	56.9	62.55	0.928	1.09	3.2	1.2
224	Myelin-associated oligodendrocyte basic protein OS=Mus musculus GN=Mobp PE=1 SV=1 - [MOBP_MOUSE]	Q9D2P8	8	7	42.35	35.88	0.928	0.871	5.6	5.1
225	Vesicle-associated membrane protein 1 OS=Mus musculus GN=Vamp1 PE=1 SV=1 - [VAMP1_MOUSE]	Q62442	6	7	42.37	44.07	0.929	0.924	2.4	2
226	Neurotrimin OS=Mus musculus GN=Ntm PE=2 SV=2 - [NTRI_MOUSE]	Q99PJ0	9	9	20.35	24.42	0.929	1.079	7.3	1.7
227	Charged multivesicular body protein 1a OS=Mus musculus GN=Chmp1a PE=1 SV=1 - [CHM1A_MOUSE]	Q921W0	4	4	14.8	15.31	0.929	0.98	3.7	1.5
228	SRC kinase signaling inhibitor 1 OS=Mus musculus GN=Srcin1 PE=1 SV=2 - [SRCN1_MOUSE]	Q9QWI6	34	49	26.48	39.52	0.929	1.062	1	0.4
229	Leucine-rich repeat-containing protein 7 OS=Mus musculus GN=Lrrc7 PE=1 SV=2 - [LRRC7_MOUSE]	Q80TE7	14	25	8.66	19.33	0.929	1.075	9.2	2
230	Ephrin type-A receptor 4 OS=Mus musculus GN=Epha4 PE=1 SV=2 - [EPHA4_MOUSE]	Q03137	7	9	6.69	10.65	0.929	1.059	4.4	2.7
231	Transketolase OS=Mus musculus GN=Tkt PE=1 SV=1 - [TKT_MOUSE]	P40142	20	22	36.44	37.4	0.93	0.985	1.9	1.4
232	NAD-dependent protein deacetylase sirtuin-2 OS=Mus musculus GN=Sirt2 PE=1 SV=2 - [SIR2_MOUSE]	Q8VDQ8	17	19	32.39	37.02	0.93	0.866	2.3	1.4
233	Endophilin-B2 OS=Mus musculus GN=Sh3glb2 PE=2 SV=2 - [SHLB2_MOUSE]	Q8R3V5	5	9	9.25	20.75	0.93	0.966	1.1	4.4
234	Aldehyde dehydrogenase family 3 member B1 OS=Mus musculus GN=Aldh3b1 PE=2 SV=1 - [AL3B1_MOUSE]	Q80VQ0	2	5	4.91	11.54	0.931	0.952	1.8	4.8
235	Gamma-aminobutyric acid receptor subunit gamma-2 OS=Mus musculus GN=Gabrg2 PE=1 SV=3 - [GBRG2_MOUSE]	P22723	4	7	9.28	13.5	0.931	1.136	6.2	6.9
236	Serine/threonine-protein kinase DCLK1 OS=Mus musculus GN=Dclk1 PE=1 SV=1 - [DCLK1_MOUSE]	Q9JLM8	18	18	24.74	29.5	0.931	1.057	2.7	2
237	Gamma-aminobutyric acid type B receptor subunit 2 OS=Mus musculus GN=Gabbr2 PE=1 SV=2 - [GABR2_MOUSE]	Q80T41	3	9	2.98	9.15	0.932	0.999	5.8	5.1
238	Protein piccolo OS=Mus musculus GN=Pclo PE=1 SV=4 - [PCLO_MOUSE]	Q9QYX7	33	73	8.37	17.11	0.932	1.053	3.7	1.4
239	COP9 signalosome complex subunit 8 OS=Mus musculus GN=Cops8 PE=1 SV=1 - [CSN8_MOUSE]	Q8VBV7	3	2	20.1	12.92	0.932	0.846	3.5	6.3
240	ATP synthase F(0) complex subunit B1, mitochondrial OS=Mus musculus GN=Atp5f1 PE=1 SV=1 - [AT5F1_MOUSE]	Q9CQQ7	17	14	42.19	38.28	0.932	1.132	1.8	3.9
241	Adaptin ear-binding coat-associated protein 1 OS=Mus musculus GN=Necap1 PE=1 SV=2 - [NECP1_MOUSE]	Q9CR95	8	7	20.73	22.55	0.933	0.957	8.9	2.3
242	Glutathione S-transferase A4 OS=Mus musculus GN=Gsta4 PE=1 SV=3 - [GSTA4_MOUSE]	P24472	5	4	22.07	18.92	0.933	1.013	1.7	3.3
243	Myc box-dependent-interacting protein 1 OS=Mus musculus GN=Bin1 PE=1 SV=1 - [BIN1_MOUSE]	O08539	16	24	29.59	41.5	0.933	0.898	1.9	0.8
244	Plexin-A1 OS=Mus musculus GN=Plxna1 PE=1 SV=1 - [PLXA1_MOUSE]	P70206	8	13	4.28	5.65	0.933	1.055	1.2	1.1
245	Neural cell adhesion molecule L1 OS=Mus musculus GN=L1cam PE=1 SV=1 - [L1CAM_MOUSE]	P11627	8	13	5.48	10.48	0.933	1.14	3.6	3.1
246	60S ribosomal protein L18 OS=Mus musculus GN=Rpl18 PE=2 SV=3 - [RL18_MOUSE]	P35980	3	6	14.89	33.51	0.934	1.129	0.8	0.6
247	Guanine nucleotide-binding protein subunit alpha-11 OS=Mus musculus GN=Gna11 PE=1 SV=1 - [GNA11_MOUSE]	P21278	16	17	39	39.83	0.934	0.964	1.8	2.4
248	WAS/WASL-interacting protein family member 3 OS=Mus musculus GN=Wipf3 PE=1 SV=1 - [WIPF3_MOUSE]	P0C7L0	15	7	31.34	13.4	0.934	0.735	4.3	2.3
249	Ermin OS=Mus musculus GN=Ermn PE=1 SV=1 - [ERMIN_MOUSE]	Q5EBJ4	6	14	14.59	60.85	0.934	0.689	3.8	6.1
250	Ras-related protein Rab-1A OS=Mus musculus GN=Rab1A PE=1 SV=3 - [RAB1A_MOUSE]	P62821	14	15	60.49	68.78	0.934	1.016	1	3.3
251	Tubulin beta-2A chain OS=Mus musculus GN=Tubb2a PE=1 SV=1 - [TBB2A_MOUSE]	Q7TMM9	26	25	61.35	62.47	0.934	1.024	5.2	2.5
252	Thy-1 membrane glycoprotein OS=Mus musculus GN=Thy1 PE=1 SV=1 - [THY1_MOUSE]	P01831	5	8	27.16	31.48	0.935	0.914	3.6	2.9
253	60S ribosomal protein L3 OS=Mus musculus GN=Rpl3 PE=1 SV=3 - [RL3_MOUSE]	P27659	7	9	11.91	15.14	0.935	1.125	2.6	2.5
254	Syntaxin-binding protein 5-like OS=Mus musculus GN=Stxbp5l PE=2 SV=1 - [STB5L_MOUSE]	Q5DQR4	5	7	5.91	8.02	0.935	1.077	3.5	1.8
255	Vesicle-trafficking protein SEC22b OS=Mus musculus GN=Sec22b PE=1 SV=3 - [SC22B_MOUSE]	O08547	5	6	30.7	38.6	0.936	1.072	4.2	4.8
256	Secretory carrier-associated membrane protein 5 OS=Mus musculus GN=Scamp5 PE=2 SV=1 - [SCAM5_MOUSE]	Q9JKD3	3	3	11.91	11.91	0.936	1.016	0.4	2
257	Phosphoglycerate mutase 1 OS=Mus musculus GN=Pgam1 PE=1 SV=3 - [PGAM1_MOUSE]	Q9DBJ1	16	14	59.84	65.75	0.936	0.878	1.5	2.5
258	Flotillin-2 OS=Mus musculus GN=Flot2 PE=1 SV=2 - [FLOT2_MOUSE]	Q60634	10	17	22.43	39.02	0.936	1.072	2.1	0
259	Synaptotagmin-1 OS=Mus musculus GN=Syt1 PE=1 SV=1 - [SYT1_MOUSE]	P46096	33	33	57.24	63.18	0.936	1.078	0.9	0.3
260	Neural cell adhesion molecule L1-like protein OS=Mus musculus GN=Chl1 PE=1 SV=2 - [CHL1_MOUSE]	P70232	3	4	1.99	2.73	0.937	1.103	3.3
261	Ezrin OS=Mus musculus GN=Ezr PE=1 SV=3 - [EZRI_MOUSE]	P26040	15	20	19.11	26.79	0.937	0.95	1.7	2.3
262	Guanine nucleotide-binding protein G(o) subunit alpha OS=Mus musculus GN=Gnao1 PE=1 SV=3 - [GNAO_MOUSE]	P18872	24	21	49.15	49.72	0.937	1.022	0.8	0.8
263	Cell cycle exit and neuronal differentiation protein 1 OS=Mus musculus GN=Cend1 PE=1 SV=1 - [CEND_MOUSE]	Q9JKC6	7	11	55.7	66.44	0.937	1.029	1.2	2.5
264	Neurexin-1 OS=Mus musculus GN=Nrxn1 PE=1 SV=3 - [NRX1A_MOUSE]	Q9CS84	17	23	12.48	16.84	0.938	1.061	2.4	5.3
265	Neuronal cell adhesion molecule OS=Mus musculus GN=Nrcam PE=1 SV=2 - [NRCAM_MOUSE]	Q810U4	10	18	8.36	13.77	0.938	1.055	1.7	3.2
266	Myosin light polypeptide 6 OS=Mus musculus GN=Myl6 PE=1 SV=3 - [MYL6_MOUSE]	Q60605	10	8	62.91	59.6	0.938	0.877	2.8	3.2
267	MARCKS-related protein OS=Mus musculus GN=Marcksl1 PE=1 SV=2 - [MRP_MOUSE]	P28667	2	6	19	27	0.939	0.743	7.4	7.1
268	Proteasome subunit alpha type-3 OS=Mus musculus GN=Psma3 PE=1 SV=3 - [PSA3_MOUSE]	O70435	4	8	12.55	29.8	0.939	0.885	1.1	4.3
269	Isoaspartyl peptidase/L-asparaginase OS=Mus musculus GN=Asrgl1 PE=1 SV=1 - [ASGL1_MOUSE]	Q8C0M9	8	9	22.09	29.45	0.94	1.066	1.8	5.8
270	NADH dehydrogenase [ubiquinone] 1 alpha subcomplex subunit 4 OS=Mus musculus GN=Ndufa4 PE=1 SV=2 - [NDUA4_MOUSE]	Q62425	8	7	56.1	56.1	0.94	1.179	3.8	2.1
271	40S ribosomal protein S4, X isoform OS=Mus musculus GN=Rps4x PE=2 SV=2 - [RS4X_MOUSE]	P62702	9	11	28.14	33.46	0.941	1.13	7.7	1.4
272	SH3 and multiple ankyrin repeat domains protein 1 OS=Mus musculus GN=Shank1 PE=1 SV=1 - [SHAN1_MOUSE]	D3YZU1	16	19	8.72	9.55	0.941	1.049	0.6	1.6
273	TOM1-like protein 2 OS=Mus musculus GN=Tom1l2 PE=2 SV=1 - [TM1L2_MOUSE]	Q5SRX1	3	7	5.72	12.03	0.942	0.957	3.5	5
274	Transgelin-3 OS=Mus musculus GN=Tagln3 PE=1 SV=1 - [TAGL3_MOUSE]	Q9R1Q8	8	12	33.17	55.28	0.942	0.902	2.2	1.7
275	NADH dehydrogenase [ubiquinone] 1 beta subcomplex subunit 8, mitochondrial OS=Mus musculus GN=Ndufb8 PE=1 SV=1 - [NDUB8_MOUSE]	Q9D6J5	4	5	31.72	34.41	0.942	1.067	1.6	2.9
276	Plasma membrane calcium-transporting ATPase 2 OS=Mus musculus GN=Atp2b2 PE=1 SV=2 - [AT2B2_MOUSE]	Q9R0K7	44	55	34.06	38.81	0.942	1.025	1.5	1.4
277	D-3-phosphoglycerate dehydrogenase OS=Mus musculus GN=Phgdh PE=1 SV=3 - [SERA_MOUSE]	Q61753	8	10	16.89	18.76	0.942	1.028	3.6	0.2
278	NADH dehydrogenase [ubiquinone] 1 subunit C2 OS=Mus musculus GN=Ndufc2 PE=1 SV=1 - [NDUC2_MOUSE]	Q9CQ54	4	8	29.17	48.33	0.942	1.076	0.5	2.9
279	Annexin A11 OS=Mus musculus GN=Anxa11 PE=1 SV=2 - [ANX11_MOUSE]	P97384	5	7	12.33	15.31	0.943	0.905	3.5	9.9
280	Calcium/calmodulin-dependent protein kinase type II subunit gamma OS=Mus musculus GN=Camk2g PE=1 SV=1 - [KCC2G_MOUSE]	Q923T9	25	27	43.48	47.26	0.943	1.071	1.5	4.7
281	Guanine nucleotide-binding protein subunit alpha-13 OS=Mus musculus GN=Gna13 PE=1 SV=1 - [GNA13_MOUSE]	P27601	13	15	35.81	40.05	0.943	1.009	1.5	1.8
282	Alpha-2-macroglobulin receptor-associated protein OS=Mus musculus GN=Lrpap1 PE=1 SV=1 - [AMRP_MOUSE]	P55302	2	12	5	31.67	0.944	1.001	3.8	2.6
283	Vesicle-associated membrane protein 2 OS=Mus musculus GN=Vamp2 PE=1 SV=2 - [VAMP2_MOUSE]	P63044	7	8	43.1	45.69	0.944	0.853	4	2.1
284	Integrin alpha-V OS=Mus musculus GN=Itgav PE=1 SV=2 - [ITAV_MOUSE]	P43406	3	4	2.49	3.07	0.944	1.053	5	3.6
285	ProSAAS OS=Mus musculus GN=Pcsk1n PE=1 SV=2 - [PCSK1_MOUSE]	Q9QXV0	10	7	36.82	31.01	0.945	0.985	1	1
286	Disks large homolog 4 OS=Mus musculus GN=Dlg4 PE=1 SV=1 - [DLG4_MOUSE]	Q62108	27	33	41.16	48.9	0.945	1.082	2.1	1.3
287	V-type proton ATPase subunit G 2 OS=Mus musculus GN=Atp6v1g2 PE=2 SV=1 - [VATG2_MOUSE]	Q9WTT4	9	10	55.08	49.15	0.945	0.919	4.1	1.7
288	Proteasome subunit beta type-6 OS=Mus musculus GN=Psmb6 PE=1 SV=3 - [PSB6_MOUSE]	Q60692	2	3	8.82	13.03	0.945	0.96	5.2	2.4
289	DnaJ homolog subfamily C member 11 OS=Mus musculus GN=Dnajc11 PE=2 SV=2 - [DJC11_MOUSE]	Q5U458	6	8	11.99	9.3	0.945	1.229	9.6	10.6
290	60S ribosomal protein L31 OS=Mus musculus GN=Rpl31 PE=2 SV=1 - [RL31_MOUSE]	P62900	7	4	38.4	23.2	0.945	1.107	1.7	4.1
291	Cell adhesion molecule 2 OS=Mus musculus GN=Cadm2 PE=1 SV=2 - [CADM2_MOUSE]	Q8BLQ9	10	11	15.4	22.76	0.946	1.008	4.3	7.3
292	Complement component 1 Q subcomponent-binding protein, mitochondrial OS=Mus musculus GN=C1qbp PE=1 SV=1 - [C1QBP_MOUSE]	O35658	3	6	16.91	37.05	0.946	1.141	2.7	6.2
293	Neuronal proto-oncogene tyrosine-protein kinase Src OS=Mus musculus GN=Src PE=1 SV=4 - [SRC_MOUSE]	P05480	12	11	20.15	18.3	0.946	0.991	2.1	6.6
294	1-phosphatidylinositol 4,5-bisphosphate phosphodiesterase beta-1 OS=Mus musculus GN=Plcb1 PE=2 SV=2 - [PLCB1_MOUSE]	Q9Z1B3	12	22	8.72	16.69	0.946	0.989	4.1	4
295	Rho-related GTP-binding protein RhoB OS=Mus musculus GN=Rhob PE=1 SV=1 - [RHOB_MOUSE]	P62746	6	5	22.96	20.92	0.946	0.96	5	2.2
296	Glutaredoxin-related protein 5, mitochondrial OS=Mus musculus GN=Glrx5 PE=2 SV=2 - [GLRX5_MOUSE]	Q80Y14	3	3	21.05	21.71	0.947	1.079	4	6.2
297	Keratin, type II cytoskeletal 2 epidermal OS=Mus musculus GN=Krt2 PE=1 SV=1 - [K22E_MOUSE]	Q3TTY5	4	6	5.52	5.94	0.947	0.432	4.3	5.3
298	FERM, RhoGEF and pleckstrin domain-containing protein 1 OS=Mus musculus GN=Farp1 PE=1 SV=1 - [FARP1_MOUSE]	F8VPU2	6	9	5.53	8.21	0.947	1.007	9.9	2.1
299	Disintegrin and metalloproteinase domain-containing protein 23 OS=Mus musculus GN=Adam23 PE=1 SV=1 - [ADA23_MOUSE]	Q9R1V7	7	9	5.91	8.56	0.947	1.003	4.8	1.6
300	40S ribosomal protein S13 OS=Mus musculus GN=Rps13 PE=2 SV=2 - [RS13_MOUSE]	P62301	10	9	47.02	51.66	0.948	1.055	0.7	5.3
301	Vesicle-associated membrane protein-associated protein A OS=Mus musculus GN=Vapa PE=1 SV=2 - [VAPA_MOUSE]	Q9WV55	7	13	28.11	46.59	0.948	1.042	3.4	0.4
302	60S ribosomal protein L30 OS=Mus musculus GN=Rpl30 PE=2 SV=2 - [RL30_MOUSE]	P62889	2	3	18.26	23.48	0.948	1.064	4.4	2.5
303	Hydroxyacylglutathione hydrolase, mitochondrial OS=Mus musculus GN=Hagh PE=1 SV=2 - [GLO2_MOUSE]	Q99KB8	4	4	13.27	13.59	0.948	0.955	0.7	5.9
304	Dual specificity protein phosphatase 3 OS=Mus musculus GN=Dusp3 PE=1 SV=1 - [DUS3_MOUSE]	Q9D7X3	2	2	16.22	14.59	0.948	1.092	9.5	13.6
305	Beta-soluble NSF attachment protein OS=Mus musculus GN=Napb PE=1 SV=2 - [SNAB_MOUSE]	P28663	20	20	63.76	58.72	0.948	0.894	1.5	3.4
306	Cell adhesion molecule 1 OS=Mus musculus GN=Cadm1 PE=1 SV=2 - [CADM1_MOUSE]	Q8R5M8	4	6	10.09	13.38	0.949	0.99	1.5	5.4
307	Sodium- and chloride-dependent GABA transporter 1 OS=Mus musculus GN=Slc6a1 PE=1 SV=2 - [SC6A1_MOUSE]	P31648	7	7	16.03	15.36	0.949	0.96	5.3	8.5
308	Alcohol dehydrogenase class-3 OS=Mus musculus GN=Adh5 PE=1 SV=3 - [ADHX_MOUSE]	P28474	4	6	8.29	12.03	0.949	1.006	2	3.3
309	Serine/threonine-protein phosphatase 2A 56 kDa regulatory subunit epsilon isoform OS=Mus musculus GN=Ppp2r5e PE=2 SV=3 - [2A5E_MOUSE]	Q61151	4	9	8.57	19.7	0.949	0.989	17.5	6.6
310	Calpain-5 OS=Mus musculus GN=Capn5 PE=2 SV=1 - [CAN5_MOUSE]	O08688	6	5	11.09	8.13	0.949	1.057	0.4	4.4
311	Proteasome subunit beta type-4 OS=Mus musculus GN=Psmb4 PE=1 SV=1 - [PSB4_MOUSE]	P99026	2	4	7.2	18.56	0.95	0.891	3.8	2.3
312	Heat shock-related 70 kDa protein 2 OS=Mus musculus GN=Hspa2 PE=1 SV=2 - [HSP72_MOUSE]	P17156	20	23	25.75	36.49	0.95	1.012	1.9	11.2
313	GTPase HRas OS=Mus musculus GN=Hras PE=1 SV=2 - [RASH_MOUSE]	Q61411	6	8	35.98	51.32	0.951	0.979	5.3	5.9
314	Microtubule-associated protein RP/EB family member 2 OS=Mus musculus GN=Mapre2 PE=1 SV=1 - [MARE2_MOUSE]	Q8R001	6	9	20.55	27.3	0.952	1.068	5.3	3.2
315	Gamma-aminobutyric acid receptor subunit beta-3 OS=Mus musculus GN=Gabrb3 PE=2 SV=1 - [GBRB3_MOUSE]	P63080	6	10	14.38	22.62	0.952	0.976	3.3	15.3
316	Metabotropic glutamate receptor 3 OS=Mus musculus GN=Grm3 PE=2 SV=1 - [GRM3_MOUSE]	Q9QYS2	5	16	5.46	18.54	0.953	1.029	3.6	2.3
317	60S ribosomal protein L18a OS=Mus musculus GN=Rpl18a PE=2 SV=1 - [RL18A_MOUSE]	P62717	3	4	14.77	19.32	0.953	1.118	7.5	7.4
318	Lactoylglutathione lyase OS=Mus musculus GN=Glo1 PE=1 SV=3 - [LGUL_MOUSE]	Q9CPU0	6	8	17.93	32.61	0.953	0.97	1.9	3.4
319	Voltage-dependent L-type calcium channel subunit beta-4 OS=Mus musculus GN=Cacnb4 PE=1 SV=2 - [CACB4_MOUSE]	Q8R0S4	10	13	15.61	24.08	0.953	1.019	5.3	7.2
320	Kinesin-like protein KIF21A OS=Mus musculus GN=Kif21a PE=1 SV=2 - [KI21A_MOUSE]	Q9QXL2	5	6	1.91	2.33	0.953	0.72	4.1	17.3
321	Voltage-dependent anion-selective channel protein 3 OS=Mus musculus GN=Vdac3 PE=1 SV=1 - [VDAC3_MOUSE]	Q60931	14	13	44.88	39.58	0.953	1.146	2.2	0.7
322	Syntaxin-binding protein 5 OS=Mus musculus GN=Stxbp5 PE=1 SV=3 - [STXB5_MOUSE]	Q8K400	6	7	6.08	7.9	0.954	0.989	1	3
323	Ubiquitin-40S ribosomal protein S27a OS=Mus musculus GN=Rps27a PE=2 SV=2 - [RS27A_MOUSE]	P62983	12	10	55.13	48.72	0.954	0.904	4	3.4
324	Lipid phosphate phosphatase-related protein type 4 OS=Mus musculus GN=Lppr4 PE=2 SV=2 - [LPPR4_MOUSE]	Q7TME0	5	11	8.22	19.19	0.954	0.979	3.1	1.5
325	Neuroligin-3 OS=Mus musculus GN=Nlgn3 PE=1 SV=2 - [NLGN3_MOUSE]	Q8BYM5	5	6	5.58	8	0.955	0.917	6	4.2
326	IQ motif and SEC7 domain-containing protein 2 OS=Mus musculus GN=Iqsec2 PE=1 SV=3 - [IQEC2_MOUSE]	Q5DU25	10	20	6.36	14.75	0.955	1.051	5.3	1.8
327	Ras-related protein Ral-A OS=Mus musculus GN=Rala PE=1 SV=1 - [RALA_MOUSE]	P63321	9	13	39.32	54.85	0.955	0.925	5.4	3
328	Plakophilin-4 OS=Mus musculus GN=Pkp4 PE=1 SV=1 - [PKP4_MOUSE]	Q68FH0	10	14	8.24	13.95	0.955	1.101	3	2.5
329	Tyrosine-protein kinase Fyn OS=Mus musculus GN=Fyn PE=1 SV=4 - [FYN_MOUSE]	P39688	9	8	14.15	12.1	0.955	1.034	2.9	0.2
330	Tyrosine-protein phosphatase non-receptor type substrate 1 OS=Mus musculus GN=Sirpa PE=1 SV=1 - [SHPS1_MOUSE]	P97797	4	13	7.6	28.65	0.955	1.005	4.7	2.2
331	Synaptotagmin-7 OS=Mus musculus GN=Syt7 PE=1 SV=1 - [SYT7_MOUSE]	Q9R0N7	8	12	22.33	28.29	0.956	1.052	0.8	2.6
332	Protein FAM177A1 OS=Mus musculus GN=Fam177a1 PE=2 SV=1 - [F177A_MOUSE]	Q8BR63	2	3	10.63	13.53	0.956	1.03	1.7	5.3
333	Calretinin OS=Mus musculus GN=Calb2 PE=1 SV=3 - [CALB2_MOUSE]	Q08331	3	5	11.81	17.34	0.956	0.855	1.4	3.3
334	Profilin-1 OS=Mus musculus GN=Pfn1 PE=1 SV=2 - [PROF1_MOUSE]	P62962	5	6	41.43	59.29	0.956	0.945	2.6	2.6
335	Neudesin OS=Mus musculus GN=Nenf PE=1 SV=1 - [NENF_MOUSE]	Q9CQ45	3	6	22.22	32.75	0.956	0.977	3.1	0.4
336	V-type proton ATPase subunit E 1 OS=Mus musculus GN=Atp6v1e1 PE=1 SV=2 - [VATE1_MOUSE]	P50518	23	23	65.04	65.93	0.956	0.897	1.5	2.3
337	Ras-related protein Rab-3A OS=Mus musculus GN=Rab3a PE=1 SV=1 - [RAB3A_MOUSE]	P63011	17	15	78.64	73.18	0.956	0.989	0.8	1.9
338	Cell adhesion molecule 3 OS=Mus musculus GN=Cadm3 PE=1 SV=1 - [CADM3_MOUSE]	Q99N28	5	8	17.42	28.28	0.956	1.038	5.1	2.9
339	Puromycin-sensitive aminopeptidase OS=Mus musculus GN=Npepps PE=1 SV=2 - [PSA_MOUSE]	Q11011	17	17	18.59	17.39	0.957	0.947	1.7	1.6
340	SH3 and multiple ankyrin repeat domains protein 2 OS=Mus musculus GN=Shank2 PE=1 SV=2 - [SHAN2_MOUSE]	Q80Z38	12	23	8.2	17.75	0.957	1.047	1.6	0.9
341	Secretogranin-2 OS=Mus musculus GN=Scg2 PE=1 SV=1 - [SCG2_MOUSE]	Q03517	9	12	14.75	20.91	0.957	0.856	2.6	6.4
342	ATP-sensitive inward rectifier potassium channel 10 OS=Mus musculus GN=Kcnj10 PE=1 SV=1 - [IRK10_MOUSE]	Q9JM63	2	4	8.71	11.35	0.957	0.973	2.3	1.5
343	Hypoxia up-regulated protein 1 OS=Mus musculus GN=Hyou1 PE=1 SV=1 - [HYOU1_MOUSE]	Q9JKR6	6	10	5.81	9.41	0.957	1.077	9.4	7.1
344	Ubiquitin thioesterase OTUB1 OS=Mus musculus GN=Otub1 PE=1 SV=2 - [OTUB1_MOUSE]	Q7TQI3	5	10	21.4	52.4	0.957	0.96	4.6	1.2
345	GTP-binding protein Rheb OS=Mus musculus GN=Rheb PE=1 SV=1 - [RHEB_MOUSE]	Q921J2	3	5	16.3	25	0.958	0.961	3.7	0.7
346	Ras/Rap GTPase-activating protein SynGAP OS=Mus musculus GN=Syngap1 PE=1 SV=2 - [SYGP1_MOUSE]	F6SEU4	56	60	44.25	44.85	0.958	1.065	0.5	1
347	Hepatocyte cell adhesion molecule OS=Mus musculus GN=Hepacam PE=1 SV=2 - [HECAM_MOUSE]	Q640R3	7	13	18.66	34.69	0.958	1.001	4.6	4.6
348	Tetraspanin-7 OS=Mus musculus GN=Tspan7 PE=2 SV=2 - [TSN7_MOUSE]	Q62283	4	5	14.86	16.47	0.959	1.006	1.3	4.3
349	Casein kinase II subunit beta OS=Mus musculus GN=Csnk2b PE=1 SV=1 - [CSK2B_MOUSE]	P67871	4	4	13.02	13.02	0.959	0.945	4.5	6.4
350	Tubulin beta-4A chain OS=Mus musculus GN=Tubb4a PE=1 SV=3 - [TBB4A_MOUSE]	Q9D6F9	23	22	54.28	61.71	0.959	0.979	3.3	2.6
351	ADP-ribosylation factor GTPase-activating protein 1 OS=Mus musculus GN=Arfgap1 PE=1 SV=2 - [ARFG1_MOUSE]	Q9EPJ9	5	7	8.45	14.01	0.96	1.024	2.7	3.1
352	Ubiquitin-like modifier-activating enzyme 1 OS=Mus musculus GN=Uba1 PE=1 SV=1 - [UBA1_MOUSE]	Q02053	22	30	27.6	30.15	0.96	0.963	0.8	2.2
353	Myosin regulatory light chain 12B OS=Mus musculus GN=Myl12b PE=1 SV=2 - [ML12B_MOUSE]	Q3THE2	2	4	17.44	27.91	0.96	0.942	3.3	5.9
354	60S ribosomal protein L7a OS=Mus musculus GN=Rpl7a PE=2 SV=2 - [RL7A_MOUSE]	P12970	9	11	27.07	30.08	0.96	1.041	3.2	4.1
355	Coiled-coil-helix-coiled-coil-helix domain-containing protein 6, mitochondrial OS=Mus musculus GN=Chchd6 PE=2 SV=2 - [CHCH6_MOUSE]	Q91VN4	10	7	28.21	27.47	0.96	1.071	5.9	3.9
356	Serine/threonine-protein phosphatase 5 OS=Mus musculus GN=Ppp5c PE=1 SV=3 - [PPP5_MOUSE]	Q60676	2	5	4.01	12.02	0.96	0.998	5.2	3.1
357	Glucosidase 2 subunit beta OS=Mus musculus GN=Prkcsh PE=1 SV=1 - [GLU2B_MOUSE]	O08795	6	7	9.79	10.94	0.96	0.959	3.3	1.8
358	Proteasome subunit alpha type-5 OS=Mus musculus GN=Psma5 PE=1 SV=1 - [PSA5_MOUSE]	Q9Z2U1	4	5	17.43	22.41	0.961	0.881	2.8	5.4
359	Guanine nucleotide-binding protein G(z) subunit alpha OS=Mus musculus GN=Gnaz PE=2 SV=4 - [GNAZ_MOUSE]	O70443	11	13	31.55	36.34	0.961	0.994	2.7	0.8
360	Guanine nucleotide-binding protein G(i) subunit alpha-2 OS=Mus musculus GN=Gnai2 PE=1 SV=5 - [GNAI2_MOUSE]	P08752	16	18	40.28	47.89	0.961	0.994	1.8	4.5
361	Tubulin alpha-4A chain OS=Mus musculus GN=Tuba4a PE=1 SV=1 - [TBA4A_MOUSE]	P68368	22	21	52.23	44.87	0.962	1.03	1.1	4.1
362	60S ribosomal protein L13a OS=Mus musculus GN=Rpl13a PE=1 SV=4 - [RL13A_MOUSE]	P19253	3	8	10.84	26.11	0.962	1.12	1.9	0.8
363	Neurofilament medium polypeptide OS=Mus musculus GN=Nefm PE=1 SV=4 - [NFM_MOUSE]	P08553	24	38	22.76	37.74	0.962	0.805	3	2.4
364	SH3 and multiple ankyrin repeat domains protein 3 OS=Mus musculus GN=Shank3 PE=1 SV=3 - [SHAN3_MOUSE]	Q4ACU6	10	16	6.36	12.54	0.963	1.07	6.9	1.8
365	IST1 homolog OS=Mus musculus GN=Ist1 PE=2 SV=1 - [IST1_MOUSE]	Q9CX00	4	5	7.46	10.22	0.963	0.918	3.2	4.7
366	NADH dehydrogenase [ubiquinone] 1 beta subcomplex subunit 9 OS=Mus musculus GN=Ndufb9 PE=1 SV=3 - [NDUB9_MOUSE]	Q9CQJ8	4	6	32.96	36.31	0.963	1.078	2.2	6.4
367	Malate dehydrogenase, cytoplasmic OS=Mus musculus GN=Mdh1 PE=1 SV=3 - [MDHC_MOUSE]	P14152	18	17	44.61	47.31	0.963	0.929	2.6	1
368	Ras-related C3 botulinum toxin substrate 1 OS=Mus musculus GN=Rac1 PE=1 SV=1 - [RAC1_MOUSE]	P63001	6	6	19.27	19.27	0.965	0.951	2.6	1
369	Peroxiredoxin-1 OS=Mus musculus GN=Prdx1 PE=1 SV=1 - [PRDX1_MOUSE]	P35700	15	11	54.27	43.22	0.965	0.927	1.6	3.3
370	60S ribosomal protein L7 OS=Mus musculus GN=Rpl7 PE=2 SV=2 - [RL7_MOUSE]	P14148	9	14	28.52	41.85	0.965	1.095	3.4	3.6
371	Ras-related protein Rab-5C OS=Mus musculus GN=Rab5c PE=1 SV=2 - [RAB5C_MOUSE]	P35278	8	9	42.59	42.59	0.965	1.055	2.3	1.7
372	Gamma-soluble NSF attachment protein OS=Mus musculus GN=Napg PE=1 SV=1 - [SNAG_MOUSE]	Q9CWZ7	16	17	44.87	53.21	0.966	0.921	2.6	2.2
373	Prenylcysteine oxidase OS=Mus musculus GN=Pcyox1 PE=1 SV=1 - [PCYOX_MOUSE]	Q9CQF9	7	10	13.47	20	0.966	1.044	2.6	1.8
374	Myelin basic protein OS=Mus musculus GN=Mbp PE=1 SV=2 - [MBP_MOUSE]	P04370	17	20	38.4	51.6	0.966	0.626	0.2	0.7
375	Unconventional myosin-VI OS=Mus musculus GN=Myo6 PE=1 SV=1 - [MYO6_MOUSE]	Q64331	12	18	8.3	14.62	0.966	1.035	3.3	2.8
376	Mitochondrial carrier homolog 2 OS=Mus musculus GN=Mtch2 PE=1 SV=1 - [MTCH2_MOUSE]	Q791V5	6	8	19.14	29.7	0.967	1.082	2.6	8.1
377	Actin-related protein 2/3 complex subunit 5-like protein OS=Mus musculus GN=Arpc5l PE=1 SV=1 - [ARP5L_MOUSE]	Q9D898	4	6	28.76	41.83	0.967	0.944	5.5	2.8
378	Glutathione S-transferase P 1 OS=Mus musculus GN=Gstp1 PE=1 SV=2 - [GSTP1_MOUSE]	P19157	8	11	51.9	54.76	0.968	0.9	1.2	1.2
379	Ankyrin repeat and sterile alpha motif domain-containing protein 1B OS=Mus musculus GN=Anks1b PE=1 SV=3 - [ANS1B_MOUSE]	Q8BIZ1	14	15	10.09	9.29	0.968	1.07	1.7	0.9
380	Receptor-type tyrosine-protein phosphatase delta OS=Mus musculus GN=Ptprd PE=1 SV=3 - [PTPRD_MOUSE]	Q64487	9	22	5.49	13.86	0.969	1.032	0.3	1.8
381	Disks large-associated protein 1 OS=Mus musculus GN=Dlgap1 PE=1 SV=3 - [DLGP1_MOUSE]	Q9D415	9	12	6.85	11.29	0.969	1.108	5.4	2.2
382	Tubulin alpha-1A chain OS=Mus musculus GN=Tuba1a PE=1 SV=1 - [TBA1A_MOUSE]	P68369	25	23	56.1	49	0.97	1.026	1.3	2
383	Platelet-activating factor acetylhydrolase IB subunit alpha OS=Mus musculus GN=Pafah1b1 PE=1 SV=2 - [LIS1_MOUSE]	P63005	6	7	15.12	17.8	0.97	0.998	5.3	4.9
384	Alanine--tRNA ligase, cytoplasmic OS=Mus musculus GN=Aars PE=1 SV=1 - [SYAC_MOUSE]	Q8BGQ7	5	10	5.27	10.64	0.97	0.948	3.4	5.1
385	Proteasome subunit alpha type-6 OS=Mus musculus GN=Psma6 PE=1 SV=1 - [PSA6_MOUSE]	Q9QUM9	6	4	23.58	15.45	0.97	0.918	1.4	2.2
386	Serine/threonine-protein kinase BRSK1 OS=Mus musculus GN=Brsk1 PE=1 SV=1 - [BRSK1_MOUSE]	Q5RJI5	5	8	4.76	8.87	0.97	1.078	8.9	7.9
387	40S ribosomal protein S9 OS=Mus musculus GN=Rps9 PE=2 SV=3 - [RS9_MOUSE]	Q6ZWN5	6	12	22.68	45.36	0.97	1.11	7.3	3.7
388	Methylcrotonoyl-CoA carboxylase subunit alpha, mitochondrial OS=Mus musculus GN=Mccc1 PE=1 SV=2 - [MCCA_MOUSE]	Q99MR8	2	4	3.91	6.42	0.97	1.102	0.2	0.7
389	Septin-2 OS=Mus musculus GN=Sept2 PE=1 SV=2 - [SEPT2_MOUSE]	P42208	6	9	20.78	32.41	0.971	0.95	1.1	3.1
390	Claudin-11 OS=Mus musculus GN=Cldn11 PE=1 SV=1 - [CLD11_MOUSE]	Q60771	4	4	14.98	14.98	0.971	0.68	2.1	4.4
391	GTP-binding protein Di-Ras2 OS=Mus musculus GN=Diras2 PE=2 SV=1 - [DIRA2_MOUSE]	Q5PR73	6	7	29.15	35.18	0.971	1.001	2.5	1.8
392	Microtubule-associated protein 2 OS=Mus musculus GN=Map2 PE=1 SV=2 - [MTAP2_MOUSE]	P20357	30	41	15.75	25.55	0.971	0.958	3.4	0.6
393	Latexin OS=Mus musculus GN=Lxn PE=1 SV=2 - [LXN_MOUSE]	P70202	2	3	12.16	12.16	0.971	1.004	0.9	0.8
394	Up-regulated during skeletal muscle growth protein 5 OS=Mus musculus GN=Usmg5 PE=1 SV=1 - [USMG5_MOUSE]	Q78IK2	4	2	55.17	27.59	0.971	0.954	8.8	5.2
395	Septin-8 OS=Mus musculus GN=Sept8 PE=1 SV=4 - [SEPT8_MOUSE]	Q8CHH9	15	18	24.01	29.14	0.971	0.939	1.3	2.2
396	60S ribosomal protein L15 OS=Mus musculus GN=Rpl15 PE=2 SV=4 - [RL15_MOUSE]	Q9CZM2	6	7	27.45	34.31	0.972	1.132	9.5	2.6
397	Ribonuclease UK114 OS=Mus musculus GN=Hrsp12 PE=1 SV=3 - [UK114_MOUSE]	P52760	4	5	35.56	36.3	0.972	0.975	6.3	2.6
398	Fatty acid synthase OS=Mus musculus GN=Fasn PE=1 SV=2 - [FAS_MOUSE]	P19096	18	29	7.39	11.82	0.972	0.981	3.3	0.9
399	Metabotropic glutamate receptor 1 OS=Mus musculus GN=Grm1 PE=1 SV=2 - [GRM1_MOUSE]	P97772	3	5	2	3.75	0.972	1.026	3.4	3.2
400	Inactive dipeptidyl peptidase 10 OS=Mus musculus GN=Dpp10 PE=2 SV=1 - [DPP10_MOUSE]	Q6NXK7	10	17	10.16	19.07	0.973	0.986	1.4	1.5
401	Rab GDP dissociation inhibitor alpha OS=Mus musculus GN=Gdi1 PE=1 SV=3 - [GDIA_MOUSE]	P50396	23	22	55.03	49.89	0.973	0.928	1.5	2.5
402	6-phosphofructokinase type C OS=Mus musculus GN=Pfkp PE=1 SV=1 - [K6PP_MOUSE]	Q9WUA3	14	20	16.33	24.23	0.974	1.016	1.3	1.7
403	Protein FAM49B OS=Mus musculus GN=Fam49b PE=2 SV=1 - [FA49B_MOUSE]	Q921M7	6	13	19.75	44.14	0.974	0.968	1.9	4.9
404	NADH dehydrogenase [ubiquinone] 1 alpha subcomplex subunit 8 OS=Mus musculus GN=Ndufa8 PE=1 SV=3 - [NDUA8_MOUSE]	Q9DCJ5	5	6	28.49	43.6	0.974	1.236	5.9	6
405	Reticulon-4 OS=Mus musculus GN=Rtn4 PE=1 SV=2 - [RTN4_MOUSE]	Q99P72	18	23	17.99	24.18	0.974	0.95	4.8	2
406	Membrane-associated progesterone receptor component 1 OS=Mus musculus GN=Pgrmc1 PE=1 SV=4 - [PGRC1_MOUSE]	O55022	11	9	38.97	38.46	0.974	1.021	3.2	2.1
407	WW domain-binding protein 2 OS=Mus musculus GN=Wbp2 PE=1 SV=1 - [WBP2_MOUSE]	P97765	2	3	4.98	8.81	0.974	0.885	0.4	1.5
408	60S ribosomal protein L27a OS=Mus musculus GN=Rpl27a PE=2 SV=5 - [RL27A_MOUSE]	P14115	3	2	19.59	12.16	0.975	1.17	1.6	13.2
409	Protein rogdi homolog OS=Mus musculus GN=Rogdi PE=2 SV=2 - [ROGDI_MOUSE]	Q3TDK6	3	3	8.01	8.01	0.975	0.982	1.6	1.9
410	40S ribosomal protein S5 OS=Mus musculus GN=Rps5 PE=2 SV=3 - [RS5_MOUSE]	P97461	2	3	8.33	12.75	0.975	1.074	18.2	6.5
411	Protein CDV3 OS=Mus musculus GN=Cdv3 PE=1 SV=2 - [CDV3_MOUSE]	Q4VAA2	6	5	28.83	27.05	0.975	0.773	4.1	2.8
412	WD repeat-containing protein 37 OS=Mus musculus GN=Wdr37 PE=2 SV=1 - [WDR37_MOUSE]	Q8CBE3	7	10	13.51	16.94	0.976	1.002	3.8	3.4
413	Solute carrier family 12 member 5 OS=Mus musculus GN=Slc12a5 PE=1 SV=2 - [S12A5_MOUSE]	Q91V14	29	34	23.11	26.89	0.976	1.141	1.1	0.5
414	Unconventional myosin-Id OS=Mus musculus GN=Myo1d PE=1 SV=1 - [MYO1D_MOUSE]	Q5SYD0	8	27	6.06	28.93	0.976	0.918	3.5	2.4
415	Connector enhancer of kinase suppressor of ras 2 OS=Mus musculus GN=Cnksr2 PE=1 SV=1 - [CNKR2_MOUSE]	Q80YA9	11	17	11.43	17.73	0.976	1.038	3	3
416	Transmembrane protein 65 OS=Mus musculus GN=Tmem65 PE=2 SV=1 - [TMM65_MOUSE]	Q4VAE3	3	3	14.1	15.38	0.977	1.123	3.1	3.5
417	60S ribosomal protein L10 OS=Mus musculus GN=Rpl10 PE=2 SV=3 - [RL10_MOUSE]	Q6ZWV3	5	7	20.09	23.36	0.977	1.074	9.6	5
418	Glutamate decarboxylase 2 OS=Mus musculus GN=Gad2 PE=2 SV=1 - [DCE2_MOUSE]	P48320	6	7	9.4	5.98	0.977	0.911	2.8	1.6
419	Protein NDRG1 OS=Mus musculus GN=Ndrg1 PE=1 SV=1 - [NDRG1_MOUSE]	Q62433	5	5	14.21	21.57	0.977	0.966	2.3	2
420	Fascin OS=Mus musculus GN=Fscn1 PE=1 SV=4 - [FSCN1_MOUSE]	Q61553	8	11	18.86	18.05	0.977	0.925	0.6	1.8
421	Protein-L-isoaspartate(D-aspartate) O-methyltransferase OS=Mus musculus GN=Pcmt1 PE=1 SV=3 - [PIMT_MOUSE]	P23506	6	6	45.37	36.12	0.977	0.909	4	11
422	Phospholipid hydroperoxide glutathione peroxidase, mitochondrial OS=Mus musculus GN=Gpx4 PE=1 SV=4 - [GPX41_MOUSE]	O70325	3	6	13.71	24.87	0.978	1.067	2.7	5.7
423	Mitochondrial pyruvate carrier 2 OS=Mus musculus GN=Mpc2 PE=1 SV=1 - [MPC2_MOUSE]	Q9D023	5	6	29.92	37.8	0.978	1.101	1	6
424	Poly(rC)-binding protein 1 OS=Mus musculus GN=Pcbp1 PE=1 SV=1 - [PCBP1_MOUSE]	P60335	3	6	7.3	18.82	0.978	0.911	1	0.7
425	Triosephosphate isomerase OS=Mus musculus GN=Tpi1 PE=1 SV=4 - [TPIS_MOUSE]	P17751	14	17	50.17	51.51	0.978	0.919	1.5	0.6
426	Leucine-rich repeat-containing protein 57 OS=Mus musculus GN=Lrrc57 PE=2 SV=1 - [LRC57_MOUSE]	Q9D1G5	5	7	18.41	32.22	0.978	0.906	3.2	4.6
427	Tryptophan--tRNA ligase, cytoplasmic OS=Mus musculus GN=Wars PE=1 SV=2 - [SYWC_MOUSE]	P32921	2	3	3.95	7.07	0.978	0.938	1.5	5.2
428	UTP--glucose-1-phosphate uridylyltransferase OS=Mus musculus GN=Ugp2 PE=2 SV=3 - [UGPA_MOUSE]	Q91ZJ5	8	12	14.37	22.64	0.978	1.02	2.7	1
429	Neurexin-3 OS=Mus musculus GN=Nrxn3 PE=1 SV=2 - [NRX3A_MOUSE]	Q6P9K9	13	13	9.23	8.66	0.978	1.024	2.1	2.6
430	Adenylate cyclase type 9 OS=Mus musculus GN=Adcy9 PE=1 SV=1 - [ADCY9_MOUSE]	P51830	7	11	4.73	7.83	0.979	0.985	8.9	1.6
431	Synaptoporin OS=Mus musculus GN=Synpr PE=1 SV=1 - [SYNPR_MOUSE]	Q8BGN8	3	5	7.55	37.36	0.979	1.007	7.3	3.4
432	Unconventional myosin-Va OS=Mus musculus GN=Myo5a PE=1 SV=2 - [MYO5A_MOUSE]	Q99104	37	64	18.19	34.92	0.979	1.045	2.4	1.6
433	Vesicle-associated membrane protein-associated protein B OS=Mus musculus GN=Vapb PE=2 SV=3 - [VAPB_MOUSE]	Q9QY76	5	7	23.87	30.86	0.979	1.024	3.2	2.3
434	6.8 kDa mitochondrial proteolipid OS=Mus musculus GN=Mp68 PE=2 SV=1 - [68MP_MOUSE]	P56379	2	2	34.48	34.48	0.98	1.029	2.1	3.1
435	Ganglioside-induced differentiation-associated protein 1-like 1 OS=Mus musculus GN=Gdap1l1 PE=2 SV=1 - [GD1L1_MOUSE]	Q8VE33	3	3	9.46	9.46	0.98	0.909	3.3	4.7
436	Microtubule-associated protein 6 OS=Mus musculus GN=Map6 PE=1 SV=2 - [MAP6_MOUSE]	Q7TSJ2	31	46	39.07	56.4	0.98	0.989	1.3	1
437	Ferritin heavy chain OS=Mus musculus GN=Fth1 PE=1 SV=2 - [FRIH_MOUSE]	P09528	4	2	24.18	13.19	0.98	0.938	1.3	6.9
438	Ras-related protein Rap-1A OS=Mus musculus GN=Rap1a PE=2 SV=1 - [RAP1A_MOUSE]	P62835	13	13	64.13	51.09	0.98	0.909	0.8	5.2
439	Alpha-adducin OS=Mus musculus GN=Add1 PE=1 SV=2 - [ADDA_MOUSE]	Q9QYC0	14	21	20.68	29.25	0.981	1.013	2.7	0.6
440	LIM and SH3 domain protein 1 OS=Mus musculus GN=Lasp1 PE=1 SV=1 - [LASP1_MOUSE]	Q61792	8	10	30.42	28.14	0.981	0.933	3.6	1.6
441	Amphiphysin OS=Mus musculus GN=Amph PE=1 SV=1 - [AMPH_MOUSE]	Q7TQF7	24	23	30.17	33.38	0.981	0.929	3.5	2.5
442	Protein tweety homolog 1 OS=Mus musculus GN=Ttyh1 PE=1 SV=1 - [TTYH1_MOUSE]	Q9D3A9	7	7	15.56	15.78	0.982	1.066	5.3	3.9
443	Protein shisa-6 homolog OS=Mus musculus GN=Shisa6 PE=1 SV=1 - [SHSA6_MOUSE]	Q3UH99	6	7	13.33	14.67	0.982	1	2.5	2.2
444	NADH dehydrogenase [ubiquinone] 1 beta subcomplex subunit 4 OS=Mus musculus GN=Ndufb4 PE=1 SV=3 - [NDUB4_MOUSE]	Q9CQC7	8	8	58.14	55.04	0.982	1.049	1.5	7.5
445	Glyoxylate reductase/hydroxypyruvate reductase OS=Mus musculus GN=Grhpr PE=1 SV=1 - [GRHPR_MOUSE]	Q91Z53	3	3	9.76	8.84	0.982	0.997	4.5	2.1
446	Ras-related protein Rab-2A OS=Mus musculus GN=Rab2a PE=1 SV=1 - [RAB2A_MOUSE]	P53994	10	12	51.89	57.08	0.982	0.958	0.9	2.1
447	Neutral cholesterol ester hydrolase 1 OS=Mus musculus GN=Nceh1 PE=1 SV=1 - [NCEH1_MOUSE]	Q8BLF1	5	10	18.63	29.41	0.983	1.005	4.7	4.8
448	Heat shock protein 105 kDa OS=Mus musculus GN=Hsph1 PE=1 SV=2 - [HS105_MOUSE]	Q61699	10	14	11.19	14.1	0.983	0.929	7	3.2
449	Choline transporter-like protein 1 OS=Mus musculus GN=Slc44a1 PE=1 SV=3 - [CTL1_MOUSE]	Q6X893	3	7	5.21	12.4	0.983	0.966	8.3	4.8
450	Actin-binding LIM protein 1 OS=Mus musculus GN=Ablim1 PE=1 SV=1 - [ABLM1_MOUSE]	Q8K4G5	6	7	10.22	10.22	0.983	1.022	6.3	2.7
451	Neurofilament heavy polypeptide OS=Mus musculus GN=Nefh PE=1 SV=3 - [NFH_MOUSE]	P19246	8	15	7.98	20.73	0.983	0.856	2.5	5.6
452	Dihydropyrimidinase-related protein 5 OS=Mus musculus GN=Dpysl5 PE=1 SV=1 - [DPYL5_MOUSE]	Q9EQF6	10	12	18.79	21.1	0.984	1.005	0.4	2.8
453	Brain-enriched guanylate kinase-associated protein OS=Mus musculus GN=Begain PE=1 SV=2 - [BEGIN_MOUSE]	Q68EF6	4	4	9	7	0.984	1.071	7.9	7.2
454	NSFL1 cofactor p47 OS=Mus musculus GN=Nsfl1c PE=1 SV=1 - [NSF1C_MOUSE]	Q9CZ44	2	10	6.76	28.65	0.984	0.902	7.8	1.6
455	Cytochrome c oxidase subunit 4 isoform 1, mitochondrial OS=Mus musculus GN=Cox4i1 PE=1 SV=2 - [COX41_MOUSE]	P19783	13	14	63.91	63.31	0.984	1.078	1.5	2.1
456	Leucine-rich glioma-inactivated protein 1 OS=Mus musculus GN=Lgi1 PE=1 SV=1 - [LGI1_MOUSE]	Q9JIA1	15	14	26.57	24.6	0.984	0.977	2.4	2
457	Endonuclease domain-containing 1 protein OS=Mus musculus GN=Endod1 PE=1 SV=2 - [ENDD1_MOUSE]	Q8C522	5	4	10.18	7.98	0.985	1.018	1.1	5.8
458	Alpha-internexin OS=Mus musculus GN=Ina PE=1 SV=3 - [AINX_MOUSE]	P46660	34	35	57.29	61.08	0.985	0.845	2.5	0.4
459	40S ribosomal protein S19 OS=Mus musculus GN=Rps19 PE=1 SV=3 - [RS19_MOUSE]	Q9CZX8	7	6	42.76	36.55	0.985	1.029	0.2	2.1
460	Guanine nucleotide-binding protein G(q) subunit alpha OS=Mus musculus GN=Gnaq PE=1 SV=4 - [GNAQ_MOUSE]	P21279	23	25	52.37	52.37	0.985	0.997	1.9	2.1
461	Cystatin-C OS=Mus musculus GN=Cst3 PE=2 SV=2 - [CYTC_MOUSE]	P21460	2	5	16.43	31.43	0.985	0.9	1.8	4
462	Peroxiredoxin-6 OS=Mus musculus GN=Prdx6 PE=1 SV=3 - [PRDX6_MOUSE]	O08709	12	13	51.34	63.39	0.985	1.047	1.1	1
463	Synaptojanin-1 OS=Mus musculus GN=Synj1 PE=1 SV=3 - [SYNJ1_MOUSE]	Q8CHC4	28	41	20.27	30.81	0.985	0.987	1.2	0.8
464	Liprin-alpha-3 OS=Mus musculus GN=Ppfia3 PE=1 SV=1 - [LIPA3_MOUSE]	P60469	7	12	5.47	10.55	0.986	0.971	5.4	4.2
465	ARF GTPase-activating protein GIT1 OS=Mus musculus GN=Git1 PE=1 SV=1 - [GIT1_MOUSE]	Q68FF6	6	10	7.53	12.34	0.986	1.06	5.9	5.4
466	Glyceraldehyde-3-phosphate dehydrogenase OS=Mus musculus GN=Gapdh PE=1 SV=2 - [G3P_MOUSE]	P16858	31	28	72.67	73.87	0.986	0.965	0.8	1.3
467	Gamma-adducin OS=Mus musculus GN=Add3 PE=1 SV=2 - [ADDG_MOUSE]	Q9QYB5	6	13	8.36	18.41	0.986	1.041	5.2	1.5
468	Protein shisa-7 OS=Mus musculus GN=Shisa7 PE=1 SV=3 - [SHSA7_MOUSE]	Q8C3Q5	7	7	13.08	10.93	0.987	1.024	4.5	2
469	Homer protein homolog 3 OS=Mus musculus GN=Homer3 PE=1 SV=2 - [HOME3_MOUSE]	Q99JP6	3	6	10.11	16.85	0.987	0.95	8.1	4
470	Rab GDP dissociation inhibitor beta OS=Mus musculus GN=Gdi2 PE=1 SV=1 - [GDIB_MOUSE]	Q61598	17	19	43.82	49.89	0.987	0.94	2.3	2
471	OX-2 membrane glycoprotein OS=Mus musculus GN=Cd200 PE=1 SV=1 - [OX2G_MOUSE]	O54901	3	4	11.87	15.83	0.988	0.986	1.5	0.8
472	Mitochondrial fission regulator 1-like OS=Mus musculus GN=Mtfr1l PE=1 SV=1 - [MFR1L_MOUSE]	Q9CWE0	3	4	11.76	14.88	0.988	1.147	11.9	3.7
473	Glutamine synthetase OS=Mus musculus GN=Glul PE=1 SV=6 - [GLNA_MOUSE]	P15105	20	17	36.46	32.98	0.988	1.025	1.9	3.6
474	Dematin OS=Mus musculus GN=Dmtn PE=1 SV=1 - [DEMA_MOUSE]	Q9WV69	6	4	15.8	9.14	0.989	1.047	1.7	0.2
475	Endoplasmic reticulum resident protein 29 OS=Mus musculus GN=Erp29 PE=1 SV=2 - [ERP29_MOUSE]	P57759	8	5	29.01	15.65	0.989	0.994	0.9	3.7
476	Activator of 90 kDa heat shock protein ATPase homolog 1 OS=Mus musculus GN=Ahsa1 PE=2 SV=2 - [AHSA1_MOUSE]	Q8BK64	2	4	5.92	14.79	0.989	1.012	1.1	5
477	Endophilin-A1 OS=Mus musculus GN=Sh3gl2 PE=1 SV=2 - [SH3G2_MOUSE]	Q62420	15	17	38.35	51.99	0.989	0.903	3.6	1.7
478	Proteasome subunit alpha type-7 OS=Mus musculus GN=Psma7 PE=1 SV=1 - [PSA7_MOUSE]	Q9Z2U0	4	4	16.94	18.15	0.99	0.904	4.8	2
479	Ras-related protein Rab-3B OS=Mus musculus GN=Rab3b PE=1 SV=1 - [RAB3B_MOUSE]	Q9CZT8	10	9	60.27	36.99	0.99	1.058	2.8	3
480	Protein QIL1 OS=Mus musculus GN=Qil1 PE=2 SV=1 - [QIL1_MOUSE]	Q8R404	5	2	42.86	21.85	0.99	1.177	0.9	8
481	Histone H2B type 3-A OS=Mus musculus GN=Hist3h2ba PE=1 SV=3 - [H2B3A_MOUSE]	Q9D2U9	16	13	77.78	72.22	0.99	1.652	1.6	3.8
482	60S ribosomal protein L12 OS=Mus musculus GN=Rpl12 PE=1 SV=2 - [RL12_MOUSE]	P35979	7	5	40	30.91	0.99	1.042	5.3	0.9
483	60S ribosomal protein L24 OS=Mus musculus GN=Rpl24 PE=2 SV=2 - [RL24_MOUSE]	Q8BP67	6	6	24.84	29.3	0.99	1.148	6.5	4.6
484	Platelet-activating factor acetylhydrolase IB subunit beta OS=Mus musculus GN=Pafah1b2 PE=1 SV=2 - [PA1B2_MOUSE]	Q61206	3	2	8.73	6.55	0.99	0.903	3.8	1.6
485	Cyclin-Y OS=Mus musculus GN=Ccny PE=1 SV=1 - [CCNY_MOUSE]	Q8BGU5	3	4	9.38	13.78	0.99	1.029	6.4	2.9
486	Transcriptional activator protein Pur-alpha OS=Mus musculus GN=Pura PE=1 SV=1 - [PURA_MOUSE]	P42669	4	7	14.33	27.41	0.99	1.044	2.6	1.2
487	Ketimine reductase mu-crystallin OS=Mus musculus GN=Crym PE=1 SV=1 - [CRYM_MOUSE]	O54983	12	15	39.3	47.28	0.991	0.995	2.6	4
488	Ras-related protein Rab-21 OS=Mus musculus GN=Rab21 PE=1 SV=4 - [RAB21_MOUSE]	P35282	5	6	20.27	30.18	0.991	0.986	5.4	3
489	6-phosphogluconate dehydrogenase, decarboxylating OS=Mus musculus GN=Pgd PE=2 SV=3 - [6PGD_MOUSE]	Q9DCD0	4	7	9.11	12.22	0.991	0.972	1.9	0.9
490	T-complex protein 1 subunit epsilon OS=Mus musculus GN=Cct5 PE=1 SV=1 - [TCPE_MOUSE]	P80316	7	15	13.68	28.65	0.991	0.901	3.4	1.7
491	60S ribosomal protein L29 OS=Mus musculus GN=Rpl29 PE=2 SV=2 - [RL29_MOUSE]	P47915	9	8	41.88	32.5	0.991	1.057	4	3.6
492	ATP synthase subunit d, mitochondrial OS=Mus musculus GN=Atp5h PE=1 SV=3 - [ATP5H_MOUSE]	Q9DCX2	16	14	79.5	80.75	0.991	1.226	1.5	4.9
493	Prostamide/prostaglandin F synthase OS=Mus musculus GN=Fam213b PE=1 SV=1 - [PGFS_MOUSE]	Q9DB60	3	2	13.93	9.95	0.991	1.092	2.5	6.7
494	Prohibitin OS=Mus musculus GN=Phb PE=1 SV=1 - [PHB_MOUSE]	P67778	19	18	66.18	64.34	0.991	1.151	1.1	3.5
495	Protein unc-13 homolog A OS=Mus musculus GN=Unc13a PE=1 SV=3 - [UN13A_MOUSE]	Q4KUS2	7	7	3.86	4.5	0.991	1.156	7.9	8.2
496	CDGSH iron-sulfur domain-containing protein 1 OS=Mus musculus GN=Cisd1 PE=1 SV=1 - [CISD1_MOUSE]	Q91WS0	5	4	46.3	37.96	0.991	1.047	3.8	1.3
497	Ubiquitin carboxyl-terminal hydrolase isozyme L1 OS=Mus musculus GN=Uchl1 PE=1 SV=1 - [UCHL1_MOUSE]	Q9R0P9	9	11	35.87	50.22	0.991	0.795	1	7.8
498	Heat shock 70 kDa protein 12A OS=Mus musculus GN=Hspa12a PE=1 SV=1 - [HS12A_MOUSE]	Q8K0U4	20	26	30.81	38.52	0.992	1.025	0.6	1.7
499	Ectonucleotide pyrophosphatase/phosphodiesterase family member 6 OS=Mus musculus GN=Enpp6 PE=2 SV=1 - [ENPP6_MOUSE]	Q8BGN3	4	10	9.09	27.05	0.992	0.93	10.2	3.9
500	Sodium-driven chloride bicarbonate exchanger OS=Mus musculus GN=Slc4a10 PE=1 SV=2 - [S4A10_MOUSE]	Q5DTL9	12	20	10.38	19.5	0.992	1.076	6.7	2
501	Adenylyl cyclase-associated protein 2 OS=Mus musculus GN=Cap2 PE=1 SV=1 - [CAP2_MOUSE]	Q9CYT6	7	9	20.38	25.84	0.993	0.957	3.1	1.1
502	Aspartate aminotransferase, cytoplasmic OS=Mus musculus GN=Got1 PE=1 SV=3 - [AATC_MOUSE]	P05201	24	24	59.81	59.08	0.993	0.927	1.2	0.8
503	Serine racemase OS=Mus musculus GN=Srr PE=1 SV=1 - [SRR_MOUSE]	Q9QZX7	2	3	5.6	7.08	0.993	1.025	0.2	2.1
504	Kinesin-like protein KIF2A OS=Mus musculus GN=Kif2a PE=1 SV=2 - [KIF2A_MOUSE]	P28740	4	13	6.24	15.46	0.993	1.024	3.6	3.8
505	Cytochrome b5 type B OS=Mus musculus GN=Cyb5b PE=1 SV=1 - [CYB5B_MOUSE]	Q9CQX2	7	7	59.59	54.11	0.993	1.006	6.1	3.5
506	Dihydropyrimidinase-related protein 1 OS=Mus musculus GN=Crmp1 PE=1 SV=1 - [DPYL1_MOUSE]	P97427	23	25	46.15	45.28	0.993	1.006	0.7	3.3
507	Ras-related protein Rab-3C OS=Mus musculus GN=Rab3c PE=1 SV=1 - [RAB3C_MOUSE]	P62823	15	13	62.11	61.23	0.993	1.027	3.5	1.1
508	Arf-GAP with GTPase, ANK repeat and PH domain-containing protein 2 OS=Mus musculus GN=Agap2 PE=2 SV=1 - [AGAP2_MOUSE]	Q3UHD9	10	16	9.02	14.92	0.993	1.067	2.2	1.4
509	CLIP-associating protein 2 OS=Mus musculus GN=Clasp2 PE=1 SV=1 - [CLAP2_MOUSE]	Q8BRT1	11	16	8.09	13.92	0.993	1.055	10.1	1.2
510	78 kDa glucose-regulated protein OS=Mus musculus GN=Hspa5 PE=1 SV=3 - [GRP78_MOUSE]	P20029	32	38	45.65	56.18	0.993	1.103	2.3	2
511	6-phosphofructokinase, muscle type OS=Mus musculus GN=Pfkm PE=1 SV=3 - [K6PF_MOUSE]	P47857	29	27	37.05	34.23	0.993	1.019	2	1.5
512	Secretory carrier-associated membrane protein 1 OS=Mus musculus GN=Scamp1 PE=1 SV=1 - [SCAM1_MOUSE]	Q8K021	9	10	33.43	35.21	0.994	0.99	2.8	2.6
513	Neurofilament light polypeptide OS=Mus musculus GN=Nefl PE=1 SV=5 - [NFL_MOUSE]	P08551	27	32	42.17	52.12	0.994	0.743	0.5	2.1
514	Wiskott-Aldrich syndrome protein family member 1 OS=Mus musculus GN=Wasf1 PE=1 SV=2 - [WASF1_MOUSE]	Q8R5H6	4	11	8.41	18.07	0.994	0.874	4.2	0.3
515	C-1-tetrahydrofolate synthase, cytoplasmic OS=Mus musculus GN=Mthfd1 PE=1 SV=4 - [C1TC_MOUSE]	Q922D8	5	10	4.81	12.19	0.994	1.029	1.4	0.5
516	Ras-related protein Rab-14 OS=Mus musculus GN=Rab14 PE=1 SV=3 - [RAB14_MOUSE]	Q91V41	13	16	59.07	67.91	0.994	0.997	1.1	2.4
517	MAGUK p55 subfamily member 6 OS=Mus musculus GN=Mpp6 PE=1 SV=1 - [MPP6_MOUSE]	Q9JLB0	6	12	9.4	18.44	0.995	0.963	2.7	1
518	Paralemmin-2 OS=Mus musculus GN=Palm2 PE=1 SV=1 - [PALM2_MOUSE]	Q8BR92	4	8	9.57	20.48	0.995	1.021	7.6	2.4
519	Long-chain fatty acid transport protein 4 OS=Mus musculus GN=Slc27a4 PE=1 SV=1 - [S27A4_MOUSE]	Q91VE0	5	3	8.24	4.98	0.995	1.051	6.5	0.2
520	Adapter molecule crk OS=Mus musculus GN=Crk PE=1 SV=1 - [CRK_MOUSE]	Q64010	2	6	5.59	22.7	0.996	0.986	2.6	5.5
521	60S ribosomal protein L36a OS=Mus musculus GN=Rpl36a PE=3 SV=2 - [RL36A_MOUSE]	P83882	3	5	19.81	24.53	0.996	1.061	7.6	4.6
522	Peroxiredoxin-5, mitochondrial OS=Mus musculus GN=Prdx5 PE=1 SV=2 - [PRDX5_MOUSE]	P99029	12	9	53.33	36.19	0.997	1.106	1.3	0.6
523	Catenin delta-2 OS=Mus musculus GN=Ctnnd2 PE=1 SV=1 - [CTND2_MOUSE]	O35927	14	17	13.15	15	0.997	1.018	6.5	4.2
524	Estradiol 17-beta-dehydrogenase 12 OS=Mus musculus GN=Hsd17b12 PE=2 SV=1 - [DHB12_MOUSE]	O70503	5	4	17.63	13.78	0.997	0.91	4.6	10
525	Pyruvate kinase PKM OS=Mus musculus GN=Pkm PE=1 SV=4 - [KPYM_MOUSE]	P52480	41	36	64.03	53.86	0.997	0.928	0.9	1
526	ATP-dependent RNA helicase DDX3Y OS=Mus musculus GN=Ddx3y PE=1 SV=2 - [DDX3Y_MOUSE]	Q62095	2	4	3.5	6.69	0.997	1.127	48.4	2.1
527	Dynamin-3 OS=Mus musculus GN=Dnm3 PE=1 SV=1 - [DYN3_MOUSE]	Q8BZ98	29	36	27.58	27.93	0.997	0.887	2.9	3.7
528	Cysteine and glycine-rich protein 1 OS=Mus musculus GN=Csrp1 PE=1 SV=3 - [CSRP1_MOUSE]	P97315	6	7	36.27	42.49	0.997	0.882	2.1	3
529	60S ribosomal protein L13 OS=Mus musculus GN=Rpl13 PE=2 SV=3 - [RL13_MOUSE]	P47963	10	13	36.97	47.87	0.997	1.048	1.5	1.5
530	Synaptic vesicle glycoprotein 2A OS=Mus musculus GN=Sv2a PE=1 SV=1 - [SV2A_MOUSE]	Q9JIS5	19	25	20.49	27.63	0.997	1.001	2.2	2.1
531	Band 4.1-like protein 3 OS=Mus musculus GN=Epb41l3 PE=1 SV=1 - [E41L3_MOUSE]	Q9WV92	27	42	27.56	45.96	0.997	0.982	2.8	1.2
532	BTB/POZ domain-containing protein KCTD12 OS=Mus musculus GN=Kctd12 PE=1 SV=1 - [KCD12_MOUSE]	Q6WVG3	7	10	24.16	33.33	0.997	0.977	1.7	1.1
533	Dolichyl-diphosphooligosaccharide--protein glycosyltransferase 48 kDa subunit OS=Mus musculus GN=Ddost PE=1 SV=2 - [OST48_MOUSE]	O54734	5	8	8.84	16.33	0.998	1.039	4.5	4.8
534	Ryanodine receptor 2 OS=Mus musculus GN=Ryr2 PE=1 SV=1 - [RYR2_MOUSE]	E9Q401	6	13	1.23	2.78	0.998	1.027	8.7	5.9
535	Cadherin-13 OS=Mus musculus GN=Cdh13 PE=1 SV=2 - [CAD13_MOUSE]	Q9WTR5	2	7	3.64	14.85	0.998	0.927	5.4	3.8
536	Serine/threonine-protein phosphatase 2A 65 kDa regulatory subunit A alpha isoform OS=Mus musculus GN=Ppp2r1a PE=1 SV=3 - [2AAA_MOUSE]	Q76MZ3	24	25	41.6	39.73	0.998	0.93	1.6	3.8
537	Membrane-associated progesterone receptor component 2 OS=Mus musculus GN=Pgrmc2 PE=1 SV=2 - [PGRC2_MOUSE]	Q80UU9	4	4	16.59	16.59	0.998	0.973	1.8	4.7
538	Probable G-protein coupled receptor 158 OS=Mus musculus GN=Gpr158 PE=1 SV=2 - [GP158_MOUSE]	Q8C419	7	15	6	11.25	0.998	1.034	3	2.2
539	Alcohol dehydrogenase [NADP(+)] OS=Mus musculus GN=Akr1a1 PE=1 SV=3 - [AK1A1_MOUSE]	Q9JII6	7	14	23.69	41.54	0.998	0.969	3.1	3.4
540	40S ribosomal protein S8 OS=Mus musculus GN=Rps8 PE=2 SV=2 - [RS8_MOUSE]	P62242	2	5	13.46	25	0.998	1.119	0.1	4.2
541	40S ribosomal protein S15a OS=Mus musculus GN=Rps15a PE=2 SV=2 - [RS15A_MOUSE]	P62245	4	6	23.08	34.62	0.998	1.113	5.1	2.5
542	Neuron-specific calcium-binding protein hippocalcin OS=Mus musculus GN=Hpca PE=1 SV=2 - [HPCA_MOUSE]	P84075	11	12	57.51	51.81	0.999	0.903	5.6	4.8
543	Septin-7 OS=Mus musculus GN=Sept7 PE=1 SV=1 - [SEPT7_MOUSE]	O55131	31	34	52.75	56.65	0.999	0.952	3.1	1.5
544	V-type proton ATPase subunit H OS=Mus musculus GN=Atp6v1h PE=1 SV=1 - [VATH_MOUSE]	Q8BVE3	19	21	50.31	46.38	0.999	0.899	1.8	1.7
545	Programmed cell death 6-interacting protein OS=Mus musculus GN=Pdcd6ip PE=1 SV=3 - [PDC6I_MOUSE]	Q9WU78	2	7	2.07	8.06	0.999	0.936	2.2	1.9
546	Serine/threonine-protein phosphatase 2A 55 kDa regulatory subunit B alpha isoform OS=Mus musculus GN=Ppp2r2a PE=1 SV=1 - [2ABA_MOUSE]	Q6P1F6	6	8	14.54	22.6	0.999	0.967	1.8	5.1
547	Protein kinase C and casein kinase substrate in neurons protein 1 OS=Mus musculus GN=Pacsin1 PE=1 SV=1 - [PACN1_MOUSE]	Q61644	28	32	49.21	61.22	0.999	0.939	3.4	0.5
548	Receptor-type tyrosine-protein phosphatase zeta OS=Mus musculus GN=Ptprz1 PE=1 SV=1 - [PRPTZ_MOUSE]	B9EKR1	5	3	2.16	1.38	0.999	1.076	10	1.8
549	Heat shock cognate 71 kDa protein OS=Mus musculus GN=Hspa8 PE=1 SV=1 - [HSP7C_MOUSE]	P63017	37	40	47.83	57.74	0.999	1.005	1.4	1.2
550	ADP-ribosylation factor 6 OS=Mus musculus GN=Arf6 PE=1 SV=2 - [ARF6_MOUSE]	P62331	5	6	27.43	27.43	0.999	1.007	2.3	4.7
551	PEX5-related protein OS=Mus musculus GN=Pex5l PE=1 SV=2 - [PEX5R_MOUSE]	Q8C437	3	6	4.59	13.4	1	0.924	4.3	3.8
552	Coiled-coil domain-containing protein 177 OS=Mus musculus GN=Ccdc177 PE=1 SV=1 - [CC177_MOUSE]	Q3UHB8	9	7	12.32	9.21	1	0.991	5.3	3.4
553	Dihydropyrimidinase-related protein 4 OS=Mus musculus GN=Dpysl4 PE=1 SV=1 - [DPYL4_MOUSE]	O35098	16	15	38.64	36.36	1	0.991	1.1	1.4
554	Monoglyceride lipase OS=Mus musculus GN=Mgll PE=1 SV=1 - [MGLL_MOUSE]	O35678	4	10	18.48	42.24	1	0.993	5.5	1.9
555	Mitochondrial carrier homolog 1 OS=Mus musculus GN=Mtch1 PE=2 SV=1 - [MTCH1_MOUSE]	Q791T5	6	5	18.25	13.37	1	1.072	4.7	7.1
556	Microtubule-associated protein 1B OS=Mus musculus GN=Map1b PE=1 SV=2 - [MAP1B_MOUSE]	P14873	27	52	11	20.29	1.001	1.02	1.1	1.8
557	Methylglutaconyl-CoA hydratase, mitochondrial OS=Mus musculus GN=Auh PE=1 SV=1 - [AUHM_MOUSE]	Q9JLZ3	14	14	36.94	36.94	1.001	1.106	2.4	0.7
558	MAGUK p55 subfamily member 2 OS=Mus musculus GN=Mpp2 PE=1 SV=1 - [MPP2_MOUSE]	Q9WV34	16	22	30.25	40.94	1.001	0.964	1.7	1.7
559	Septin-4 OS=Mus musculus GN=Sept4 PE=1 SV=1 - [SEPT4_MOUSE]	P28661	12	17	24.27	36.61	1.001	0.916	1.9	1.4
560	Reticulon-3 OS=Mus musculus GN=Rtn3 PE=1 SV=2 - [RTN3_MOUSE]	Q9ES97	8	20	8.09	18.46	1.002	0.956	0.9	2.8
561	Phosphoserine aminotransferase OS=Mus musculus GN=Psat1 PE=1 SV=1 - [SERC_MOUSE]	Q99K85	10	11	26.49	29.46	1.002	0.98	3.1	3.5
562	Core histone macro-H2A.1 OS=Mus musculus GN=H2afy PE=1 SV=3 - [H2AY_MOUSE]	Q9QZQ8	11	6	38.71	20.16	1.002	1.366	5.7	5.1
563	Alpha-actinin-4 OS=Mus musculus GN=Actn4 PE=1 SV=1 - [ACTN4_MOUSE]	P57780	10	19	12.94	23.14	1.003	1.024	1	1.7
564	Acyl-protein thioesterase 2 OS=Mus musculus GN=Lypla2 PE=1 SV=1 - [LYPA2_MOUSE]	Q9WTL7	3	3	9.09	9.09	1.003	1.059	8.5	2.6
565	40S ribosomal protein S2 OS=Mus musculus GN=Rps2 PE=2 SV=3 - [RS2_MOUSE]	P25444	8	10	24.23	28.67	1.003	1.123	4	1.1
566	Ras-related protein M-Ras OS=Mus musculus GN=Mras PE=1 SV=1 - [RASM_MOUSE]	O08989	3	3	13.46	13.46	1.003	0.941	4.5	7.3
567	Glutaredoxin-1 OS=Mus musculus GN=Glrx PE=1 SV=3 - [GLRX1_MOUSE]	Q9QUH0	2	4	8.41	19.63	1.003	0.865	3	5.5
568	Tumor protein p63-regulated gene 1-like protein OS=Mus musculus GN=Tprg1l PE=1 SV=1 - [TPRGL_MOUSE]	Q9DBS2	6	8	37.97	44.36	1.003	0.98	5.2	2.2
569	Disks large homolog 3 OS=Mus musculus GN=Dlg3 PE=1 SV=1 - [DLG3_MOUSE]	P70175	7	20	6.95	24.03	1.004	0.971	4.9	3.3
570	Ras-related protein Rab-7a OS=Mus musculus GN=Rab7a PE=1 SV=2 - [RAB7A_MOUSE]	P51150	9	14	43.48	64.73	1.004	0.986	2.2	2.9
571	TBC1 domain family member 10B OS=Mus musculus GN=Tbc1d10b PE=1 SV=2 - [TB10B_MOUSE]	Q8BHL3	6	3	11.15	4.51	1.004	1.071	4.6	2.2
572	Synapsin-1 OS=Mus musculus GN=Syn1 PE=1 SV=2 - [SYN1_MOUSE]	O88935	35	34	63.74	63.17	1.004	0.946	1.5	0.8
573	Abhydrolase domain-containing protein 16A OS=Mus musculus GN=Abhd16a PE=1 SV=3 - [ABHGA_MOUSE]	Q9Z1Q2	3	3	6.27	6.45	1.004	1.002		1.4
574	Disintegrin and metalloproteinase domain-containing protein 11 OS=Mus musculus GN=Adam11 PE=1 SV=2 - [ADA11_MOUSE]	Q9R1V4	4	4	5.3	4.66	1.004	1.068	2.4	3.4
575	Cytosolic 10-formyltetrahydrofolate dehydrogenase OS=Mus musculus GN=Aldh1l1 PE=1 SV=1 - [AL1L1_MOUSE]	Q8R0Y6	8	10	9.31	10.75	1.004	1.103	1.8	6.7
576	Actin-related protein 2 OS=Mus musculus GN=Actr2 PE=1 SV=1 - [ARP2_MOUSE]	P61161	12	13	25.89	34.01	1.005	0.993	1.8	3
577	Elongation factor 1-alpha 2 OS=Mus musculus GN=Eef1a2 PE=1 SV=1 - [EF1A2_MOUSE]	P62631	15	17	31.1	33.05	1.005	0.984	1.8	4.5
578	Annexin A7 OS=Mus musculus GN=Anxa7 PE=2 SV=2 - [ANXA7_MOUSE]	Q07076	14	13	26.35	25.7	1.005	0.897	0.7	2.9
579	Glutathione S-transferase Mu 5 OS=Mus musculus GN=Gstm5 PE=1 SV=1 - [GSTM5_MOUSE]	P48774	7	11	32.14	42.41	1.005	0.96	1.8	1.7
580	Creatine kinase B-type OS=Mus musculus GN=Ckb PE=1 SV=1 - [KCRB_MOUSE]	Q04447	30	29	67.19	68.5	1.005	0.984	0.4	0.5
581	Cysteine-rich protein 2 OS=Mus musculus GN=Crip2 PE=1 SV=1 - [CRIP2_MOUSE]	Q9DCT8	3	6	31.73	38.46	1.006	0.785	2.1	1.8
582	Phosphoglucomutase-1 OS=Mus musculus GN=Pgm1 PE=1 SV=4 - [PGM1_MOUSE]	Q9D0F9	9	12	16.37	21.71	1.006	0.997	4.6	2.4
583	Catenin delta-1 OS=Mus musculus GN=Ctnnd1 PE=1 SV=2 - [CTND1_MOUSE]	P30999	2	4	2.99	4.58	1.006	0.942	7.9	10
584	Carnitine O-palmitoyltransferase 1, brain isoform OS=Mus musculus GN=Cpt1c PE=1 SV=1 - [CPT1C_MOUSE]	Q8BGD5	3	5	3.76	7.39	1.006	1.042	6.7	2.7
585	OCIA domain-containing protein 2 OS=Mus musculus GN=Ociad2 PE=1 SV=1 - [OCAD2_MOUSE]	Q9D8W7	5	3	29.87	20.78	1.006	0.965	7.3	6.8
586	Vacuolar protein sorting-associated protein 29 OS=Mus musculus GN=Vps29 PE=1 SV=1 - [VPS29_MOUSE]	Q9QZ88	3	5	17.03	28.02	1.006	1.016	5.9	7.9
587	Heat shock 70 kDa protein 4 OS=Mus musculus GN=Hspa4 PE=1 SV=1 - [HSP74_MOUSE]	Q61316	18	28	18.91	32.7	1.006	0.929	1.9	2.8
588	Metaxin-2 OS=Mus musculus GN=Mtx2 PE=1 SV=1 - [MTX2_MOUSE]	O88441	5	2	20.91	6.84	1.006	1.008	4.2	2.8
589	Contactin-associated protein 1 OS=Mus musculus GN=Cntnap1 PE=2 SV=2 - [CNTP1_MOUSE]	O54991	19	24	14.37	18.48	1.006	1.048	1.2	2.3
590	CB1 cannabinoid receptor-interacting protein 1 OS=Mus musculus GN=Cnrip1 PE=1 SV=1 - [CNRP1_MOUSE]	Q5M8N0	4	7	34.15	55.49	1.006	0.898	1.7	0.2
591	Ubiquitin-conjugating enzyme E2 variant 2 OS=Mus musculus GN=Ube2v2 PE=2 SV=4 - [UB2V2_MOUSE]	Q9D2M8	4	7	17.24	35.86	1.006	0.945	4.4	3.6
592	Guanine nucleotide-binding protein G(i) subunit alpha-1 OS=Mus musculus GN=Gnai1 PE=2 SV=1 - [GNAI1_MOUSE]	B2RSH2	15	18	42.09	47.74	1.006	0.98	1.4	2.5
593	Beta-centractin OS=Mus musculus GN=Actr1b PE=1 SV=1 - [ACTY_MOUSE]	Q8R5C5	7	8	16.49	31.12	1.006	0.964	4.4	0.2
594	60S ribosomal protein L8 OS=Mus musculus GN=Rpl8 PE=2 SV=2 - [RL8_MOUSE]	P62918	10	9	26.07	28.02	1.007	1.092	1.1	2.2
595	Ubiquitin-conjugating enzyme E2 N OS=Mus musculus GN=Ube2n PE=1 SV=1 - [UBE2N_MOUSE]	P61089	5	7	29.61	52.63	1.007	0.901	3	3.3
596	Disks large homolog 1 OS=Mus musculus GN=Dlg1 PE=1 SV=1 - [DLG1_MOUSE]	Q811D0	14	24	16.57	25.41	1.007	1.03	3.7	3.1
597	Ankyrin-3 OS=Mus musculus GN=Ank3 PE=1 SV=1 - [ANK3_MOUSE]	G5E8K5	31	38	14.99	18.51	1.007	0.961	1.3	2.8
598	Pyridoxal kinase OS=Mus musculus GN=Pdxk PE=1 SV=1 - [PDXK_MOUSE]	Q8K183	7	9	25	33.33	1.007	0.952	1	1.3
599	cAMP-dependent protein kinase type II-alpha regulatory subunit OS=Mus musculus GN=Prkar2a PE=1 SV=2 - [KAP2_MOUSE]	P12367	10	12	27.68	35.91	1.007	0.998	3.3	0.3
600	Tubulin beta-3 chain OS=Mus musculus GN=Tubb3 PE=1 SV=1 - [TBB3_MOUSE]	Q9ERD7	23	21	52.22	52.67	1.007	1.014	2.7	4.2
601	Ankyrin-2 OS=Mus musculus GN=Ank2 PE=1 SV=2 - [ANK2_MOUSE]	Q8C8R3	71	89	20.42	24.06	1.008	0.986	1.1	1.1
602	Alpha-soluble NSF attachment protein OS=Mus musculus GN=Napa PE=1 SV=1 - [SNAA_MOUSE]	Q9DB05	11	13	42.03	50.51	1.008	0.905	6.6	0.6
603	Rho GDP-dissociation inhibitor 1 OS=Mus musculus GN=Arhgdia PE=1 SV=3 - [GDIR1_MOUSE]	Q99PT1	9	11	45.59	46.57	1.008	0.875	2.8	3.7
604	Tenascin-R OS=Mus musculus GN=Tnr PE=1 SV=2 - [TENR_MOUSE]	Q8BYI9	13	17	12	16.35	1.008	1.055	2.9	1.2
605	40S ribosomal protein S3 OS=Mus musculus GN=Rps3 PE=1 SV=1 - [RS3_MOUSE]	P62908	7	7	34.57	31.69	1.008	1.017	3.2	1.6
606	WD repeat-containing protein 1 OS=Mus musculus GN=Wdr1 PE=1 SV=3 - [WDR1_MOUSE]	O88342	12	17	21.62	27.39	1.008	0.967	2.1	1.7
607	Ubiquitin carboxyl-terminal hydrolase 5 OS=Mus musculus GN=Usp5 PE=1 SV=1 - [UBP5_MOUSE]	P56399	11	14	12.24	18.41	1.009	1.009	1.2	6.3
608	Alpha-crystallin B chain OS=Mus musculus GN=Cryab PE=1 SV=2 - [CRYAB_MOUSE]	P23927	5	7	41.14	42.86	1.009	0.918	4.4	2.6
609	Dolichyl-diphosphooligosaccharide--protein glycosyltransferase subunit 1 OS=Mus musculus GN=Rpn1 PE=2 SV=1 - [RPN1_MOUSE]	Q91YQ5	9	13	15.63	19.08	1.009	1.148	3.2	3.1
610	Adenylyl cyclase-associated protein 1 OS=Mus musculus GN=Cap1 PE=1 SV=4 - [CAP1_MOUSE]	P40124	9	14	21.52	32.28	1.009	0.925	3	2.2
611	Calnexin OS=Mus musculus GN=Canx PE=1 SV=1 - [CALX_MOUSE]	P35564	17	18	25.72	30.63	1.009	1.094	1.4	2.4
612	Carbonic anhydrase 2 OS=Mus musculus GN=Ca2 PE=1 SV=4 - [CAH2_MOUSE]	P00920	12	14	60.38	65.38	1.009	0.894	0.7	0.4
613	Coronin-1A OS=Mus musculus GN=Coro1a PE=1 SV=5 - [COR1A_MOUSE]	O89053	10	12	20.61	26.9	1.009	1.018	6	3.2
614	Protein canopy homolog 2 OS=Mus musculus GN=Cnpy2 PE=1 SV=1 - [CNPY2_MOUSE]	Q9QXT0	2	4	15.38	25.27	1.009	1.018	2.1	2.7
615	Protein disulfide-isomerase A4 OS=Mus musculus GN=Pdia4 PE=1 SV=3 - [PDIA4_MOUSE]	P08003	16	13	20.85	19.91	1.009	1.074	3	4.9
616	Actin-related protein 2/3 complex subunit 2 OS=Mus musculus GN=Arpc2 PE=1 SV=3 - [ARPC2_MOUSE]	Q9CVB6	10	11	27.33	35.67	1.009	0.925	4.1	1.7
617	Voltage-dependent R-type calcium channel subunit alpha-1E OS=Mus musculus GN=Cacna1e PE=1 SV=1 - [CAC1E_MOUSE]	Q61290	7	8	2.73	2.86	1.009	1.051	6.9	1.8
618	Coronin-1B OS=Mus musculus GN=Coro1b PE=1 SV=1 - [COR1B_MOUSE]	Q9WUM3	3	5	3.72	6.4	1.01	0.956	1.6	0.4
619	Pyridoxal phosphate phosphatase OS=Mus musculus GN=Pdxp PE=1 SV=1 - [PLPP_MOUSE]	P60487	6	6	22.95	27.4	1.01	0.975	2.6	8.8
620	cAMP-dependent protein kinase type II-beta regulatory subunit OS=Mus musculus GN=Prkar2b PE=1 SV=3 - [KAP3_MOUSE]	P31324	14	15	37.74	37.74	1.01	0.915	3.3	0.7
621	Calcium uniporter protein, mitochondrial OS=Mus musculus GN=Mcu PE=1 SV=2 - [MCU_MOUSE]	Q3UMR5	8	11	21.71	29.14	1.01	1.166	3.4	3.7
622	EH domain-containing protein 3 OS=Mus musculus GN=Ehd3 PE=1 SV=2 - [EHD3_MOUSE]	Q9QXY6	14	14	34.21	29.16	1.011	0.948	3.1	1.2
623	Solute carrier family 2, facilitated glucose transporter member 3 OS=Mus musculus GN=Slc2a3 PE=1 SV=1 - [GTR3_MOUSE]	P32037	10	10	20.49	25.76	1.011	0.928	0.4	3.4
624	Tetraspanin-2 OS=Mus musculus GN=Tspan2 PE=1 SV=1 - [TSN2_MOUSE]	Q922J6	2	5	10.41	15.84	1.011	0.822	3.9	3.7
625	Hypoxanthine-guanine phosphoribosyltransferase OS=Mus musculus GN=Hprt1 PE=1 SV=3 - [HPRT_MOUSE]	P00493	3	5	15.6	23.39	1.011	0.891	4.2	5.1
626	26S proteasome non-ATPase regulatory subunit 3 OS=Mus musculus GN=Psmd3 PE=1 SV=3 - [PSMD3_MOUSE]	P14685	3	4	6.23	8.49	1.011	0.936	8.9	2.2
627	Keratin, type II cytoskeletal 1 OS=Mus musculus GN=Krt1 PE=1 SV=4 - [K2C1_MOUSE]	P04104	4	7	4.87	7.38	1.011	0.441	6.1	3.9
628	Proline-rich transmembrane protein 3 OS=Mus musculus GN=Prrt3 PE=1 SV=1 - [PRRT3_MOUSE]	Q6PE13	2	3	1.44	2.88	1.012	1.017		4.3
629	Metabotropic glutamate receptor 5 OS=Mus musculus GN=Grm5 PE=1 SV=2 - [GRM5_MOUSE]	Q3UVX5	9	13	6.23	10.06	1.012	1.076	1.2	0.8
630	Peptidyl-prolyl cis-trans isomerase F, mitochondrial OS=Mus musculus GN=Ppif PE=1 SV=1 - [PPIF_MOUSE]	Q99KR7	6	5	19.42	16.5	1.012	1.173	3.3	7.9
631	Microtubule-associated protein 1A OS=Mus musculus GN=Map1a PE=1 SV=2 - [MAP1A_MOUSE]	Q9QYR6	19	38	8.57	14.37	1.012	0.951	2.9	0.9
632	Prolow-density lipoprotein receptor-related protein 1 OS=Mus musculus GN=Lrp1 PE=1 SV=1 - [LRP1_MOUSE]	Q91ZX7	7	23	1.1	4.91	1.012	1.047	4.1	1.2
633	Mitochondrial import receptor subunit TOM40 homolog OS=Mus musculus GN=Tomm40 PE=1 SV=3 - [TOM40_MOUSE]	Q9QYA2	6	6	16.9	16.9	1.012	1.071	2.9	6.5
634	Receptor-type tyrosine-protein phosphatase alpha OS=Mus musculus GN=Ptpra PE=1 SV=3 - [PTPRA_MOUSE]	P18052	5	6	4.95	6.27	1.012	1.072	1.3	4
635	AP2-associated protein kinase 1 OS=Mus musculus GN=Aak1 PE=1 SV=2 - [AAK1_MOUSE]	Q3UHJ0	13	21	19.29	29.2	1.012	0.958	2	3.6
636	SH3-containing GRB2-like protein 3-interacting protein 1 OS=Mus musculus GN=Sgip1 PE=1 SV=1 - [SGIP1_MOUSE]	Q8VD37	7	14	9.68	21.46	1.013	0.972	3.6	1.3
637	Tropomodulin-2 OS=Mus musculus GN=Tmod2 PE=1 SV=2 - [TMOD2_MOUSE]	Q9JKK7	12	14	37.32	42.17	1.013	0.964	4	3.3
638	Probable cationic amino acid transporter OS=Mus musculus GN=Slc7a14 PE=2 SV=1 - [S7A14_MOUSE]	Q8BXR1	4	4	5.19	5.19	1.013	0.92	1.4	3
639	Gap junction alpha-1 protein OS=Mus musculus GN=Gja1 PE=1 SV=2 - [CXA1_MOUSE]	P23242	9	13	21.73	26.18	1.013	1.006	2.8	6.9
640	Protein KIAA1045 OS=Mus musculus GN=Kiaa1045 PE=2 SV=2 - [K1045_MOUSE]	Q80TL4	6	7	13	13.75	1.013	0.971	4.3	3.3
641	60S ribosomal protein L35 OS=Mus musculus GN=Rpl35 PE=2 SV=1 - [RL35_MOUSE]	Q6ZWV7	4	5	32.52	30.08	1.014	1.111	3.3	9.3
642	Disks large homolog 2 OS=Mus musculus GN=Dlg2 PE=1 SV=2 - [DLG2_MOUSE]	Q91XM9	17	29	21.48	38.03	1.014	1.039	4.9	2.1
643	Noelin OS=Mus musculus GN=Olfm1 PE=1 SV=1 - [NOE1_MOUSE]	O88998	6	8	9.48	15.88	1.014	1.001	4	6.1
644	Dynactin subunit 2 OS=Mus musculus GN=Dctn2 PE=1 SV=3 - [DCTN2_MOUSE]	Q99KJ8	14	17	30.35	37.06	1.014	0.953	1.1	3.7
645	Regulator of G-protein signaling 7 OS=Mus musculus GN=Rgs7 PE=1 SV=2 - [RGS7_MOUSE]	O54829	10	13	23.24	26.44	1.014	0.934	4.2	4
646	Zinc finger C2HC domain-containing protein 1A OS=Mus musculus GN=Zc2hc1a PE=2 SV=1 - [ZC21A_MOUSE]	Q8BJH1	5	5	16.36	14.81	1.015	0.996	4.9	3.6
647	60S ribosomal protein L17 OS=Mus musculus GN=Rpl17 PE=2 SV=3 - [RL17_MOUSE]	Q9CPR4	5	7	23.91	36.41	1.015	1.048	0.7	2
648	Aspartyl aminopeptidase OS=Mus musculus GN=Dnpep PE=2 SV=2 - [DNPEP_MOUSE]	Q9Z2W0	2	2	4.23	4.23	1.015	0.946	2.4	11.2
649	DmX-like protein 2 OS=Mus musculus GN=Dmxl2 PE=1 SV=3 - [DMXL2_MOUSE]	Q8BPN8	23	43	7.98	14.31	1.015	1.013	1.9	0.6
650	Proteasome subunit alpha type-1 OS=Mus musculus GN=Psma1 PE=1 SV=1 - [PSA1_MOUSE]	Q9R1P4	4	7	17.49	27.38	1.015	0.879	3.1	2.4
651	Glycogen phosphorylase, brain form OS=Mus musculus GN=Pygb PE=1 SV=3 - [PYGB_MOUSE]	Q8CI94	37	36	41.87	40.57	1.015	1.084	0.4	0.4
652	Adenylate kinase isoenzyme 1 OS=Mus musculus GN=Ak1 PE=1 SV=1 - [KAD1_MOUSE]	Q9R0Y5	9	8	42.78	41.75	1.015	0.967	5.8	1.4
653	Actin-related protein 2/3 complex subunit 1A OS=Mus musculus GN=Arpc1a PE=1 SV=1 - [ARC1A_MOUSE]	Q9R0Q6	9	12	20	24.86	1.016	0.928	2.4	4.5
654	Aquaporin-4 OS=Mus musculus GN=Aqp4 PE=2 SV=2 - [AQP4_MOUSE]	P55088	10	9	23.53	23.22	1.016	0.847	2.9	0.9
655	Mitogen-activated protein kinase 3 OS=Mus musculus GN=Mapk3 PE=1 SV=5 - [MK03_MOUSE]	Q63844	7	8	16.05	18.95	1.016	1.019	0.8	1.3
656	NADH dehydrogenase [ubiquinone] 1 beta subcomplex subunit 3 OS=Mus musculus GN=Ndufb3 PE=1 SV=1 - [NDUB3_MOUSE]	Q9CQZ6	5	4	25.96	25.96	1.016	1.196	6.7	3
657	Hyaluronan and proteoglycan link protein 1 OS=Mus musculus GN=Hapln1 PE=2 SV=1 - [HPLN1_MOUSE]	Q9QUP5	8	7	18.82	16.01	1.016	0.837	4.1	1.7
658	Serine/threonine-protein phosphatase 2A catalytic subunit alpha isoform OS=Mus musculus GN=Ppp2ca PE=1 SV=1 - [PP2AA_MOUSE]	P63330	9	7	30.1	25.89	1.016	0.959	2	4.5
659	3-hydroxyacyl-CoA dehydrogenase type-2 OS=Mus musculus GN=Hsd17b10 PE=1 SV=4 - [HCD2_MOUSE]	O08756	6	8	33.72	34.87	1.017	1.107	4.1	2.1
660	T-complex protein 1 subunit gamma OS=Mus musculus GN=Cct3 PE=1 SV=1 - [TCPG_MOUSE]	P80318	10	16	16.51	26.42	1.017	0.953	1.2	1.6
661	NADH dehydrogenase [ubiquinone] 1 alpha subcomplex subunit 6 OS=Mus musculus GN=Ndufa6 PE=1 SV=1 - [NDUA6_MOUSE]	Q9CQZ5	9	7	56.49	51.15	1.017	1.199	2.8	1.4
662	Nucleobindin-1 OS=Mus musculus GN=Nucb1 PE=1 SV=2 - [NUCB1_MOUSE]	Q02819	5	10	11.33	25.71	1.017	1.107	1.6	2.9
663	CaM kinase-like vesicle-associated protein OS=Mus musculus GN=Camkv PE=1 SV=2 - [CAMKV_MOUSE]	Q3UHL1	12	18	31.05	37.5	1.017	0.983	4.6	0.8
664	Serine/threonine-protein phosphatase 2B catalytic subunit beta isoform OS=Mus musculus GN=Ppp3cb PE=1 SV=2 - [PP2BB_MOUSE]	P48453	15	15	27.62	29.33	1.018	0.974	4.9	2
665	Lymphocyte antigen 6H OS=Mus musculus GN=Ly6h PE=2 SV=2 - [LY6H_MOUSE]	Q9WUC3	3	4	10.79	23.02	1.018	0.87	0.5	5.9
666	Plectin OS=Mus musculus GN=Plec PE=1 SV=2 - [PLEC_MOUSE]	Q9QXS1	42	83	9.53	18.14	1.018	0.997	1.6	0.5
667	Protein RUFY3 OS=Mus musculus GN=Rufy3 PE=1 SV=1 - [RUFY3_MOUSE]	Q9D394	9	15	18.55	30.28	1.018	1.056	7	2
668	Translocon-associated protein subunit delta OS=Mus musculus GN=Ssr4 PE=2 SV=1 - [SSRD_MOUSE]	Q62186	2	3	12.21	18.02	1.019	1.067	2.2	6.4
669	Glutathione S-transferase Mu 1 OS=Mus musculus GN=Gstm1 PE=1 SV=2 - [GSTM1_MOUSE]	P10649	22	19	79.36	66.06	1.019	1.081	1.2	1.6
670	NEDD8-conjugating enzyme Ubc12 OS=Mus musculus GN=Ube2m PE=2 SV=1 - [UBC12_MOUSE]	P61082	2	4	10.93	18.58	1.019	0.907		6.9
671	Aldose reductase OS=Mus musculus GN=Akr1b1 PE=1 SV=3 - [ALDR_MOUSE]	P45376	7	7	20.25	20.25	1.02	0.963	4.1	4.6
672	Serine/threonine-protein phosphatase 2B catalytic subunit alpha isoform OS=Mus musculus GN=Ppp3ca PE=1 SV=1 - [PP2BA_MOUSE]	P63328	26	22	38.58	42.8	1.02	0.945	1.1	2.7
673	Neurochondrin OS=Mus musculus GN=Ncdn PE=1 SV=1 - [NCDN_MOUSE]	Q9Z0E0	15	20	20.71	30.86	1.02	0.925	0.8	2.3
674	Calcium-dependent secretion activator 1 OS=Mus musculus GN=Cadps PE=1 SV=3 - [CAPS1_MOUSE]	Q80TJ1	27	32	22.36	25.31	1.02	0.988	2.4	1.5
675	Phytanoyl-CoA hydroxylase-interacting protein OS=Mus musculus GN=Phyhip PE=1 SV=1 - [PHYIP_MOUSE]	Q8K0S0	6	7	14.55	20	1.021	1.009	17.7	2.9
676	Mitogen-activated protein kinase 1 OS=Mus musculus GN=Mapk1 PE=1 SV=3 - [MK01_MOUSE]	P63085	11	13	30.45	31.01	1.021	0.966	2.2	5.3
677	Cytochrome b-c1 complex subunit Rieske, mitochondrial OS=Mus musculus GN=Uqcrfs1 PE=1 SV=1 - [UCRI_MOUSE]	Q9CR68	11	10	49.64	40.88	1.021	1.099	0.9	1.5
678	Long-chain-fatty-acid--CoA ligase 6 OS=Mus musculus GN=Acsl6 PE=2 SV=1 - [ACSL6_MOUSE]	Q91WC3	18	15	24.39	22.81	1.022	1.085	2.3	2.7
679	Probable phospholipid-transporting ATPase IA OS=Mus musculus GN=Atp8a1 PE=1 SV=1 - [AT8A1_MOUSE]	P70704	17	26	16.1	23.5	1.022	0.912	1.3	1.7
680	3-ketoacyl-CoA thiolase A, peroxisomal OS=Mus musculus GN=Acaa1a PE=1 SV=1 - [THIKA_MOUSE]	Q921H8	6	7	18.16	23.35	1.022	1.036	3.9	3.8
681	Cytochrome c oxidase subunit 6A1, mitochondrial OS=Mus musculus GN=Cox6a1 PE=1 SV=2 - [CX6A1_MOUSE]	P43024	2	3	45.05	59.46	1.022	1.13	2.9	3
682	Cytosolic acyl coenzyme A thioester hydrolase OS=Mus musculus GN=Acot7 PE=1 SV=2 - [BACH_MOUSE]	Q91V12	5	10	17.32	26.77	1.023	0.97	1.1	0.7
683	Serotransferrin OS=Mus musculus GN=Tf PE=1 SV=1 - [TRFE_MOUSE]	Q921I1	5	4	6.74	5.45	1.023	0.974	2.6	6.2
684	Calcium/calmodulin-dependent protein kinase type 1D OS=Mus musculus GN=Camk1d PE=1 SV=2 - [KCC1D_MOUSE]	Q8BW96	7	7	19.74	20.52	1.023	1.075	10.5	3
685	Ras-related protein Rab-4B OS=Mus musculus GN=Rab4b PE=2 SV=2 - [RAB4B_MOUSE]	Q91ZR1	5	5	27.23	24.41	1.023	1.04	2.2	2.4
686	60S ribosomal protein L4 OS=Mus musculus GN=Rpl4 PE=1 SV=3 - [RL4_MOUSE]	Q9D8E6	6	12	11.46	23.39	1.024	1.175	3.4	3.8
687	C-terminal-binding protein 1 OS=Mus musculus GN=Ctbp1 PE=1 SV=2 - [CTBP1_MOUSE]	O88712	8	8	17.46	16.1	1.024	0.979	2.7	2.6
688	Septin-6 OS=Mus musculus GN=Sept6 PE=1 SV=4 - [SEPT6_MOUSE]	Q9R1T4	14	20	23.27	36.41	1.024	1	2	2.4
689	Sarcoplasmic/endoplasmic reticulum calcium ATPase 2 OS=Mus musculus GN=Atp2a2 PE=1 SV=2 - [AT2A2_MOUSE]	O55143	31	35	27.68	31.13	1.024	1.05	2.2	0.8
690	Protein phosphatase 1 regulatory subunit 7 OS=Mus musculus GN=Ppp1r7 PE=1 SV=2 - [PP1R7_MOUSE]	Q3UM45	4	5	12.47	18.84	1.024	0.89	4.3	2.2
691	Isochorismatase domain-containing protein 2A, mitochondrial OS=Mus musculus GN=Isoc2a PE=1 SV=1 - [ISC2A_MOUSE]	P85094	4	2	23.79	12.14	1.024	1.054	5.4	1.7
692	Myosin-10 OS=Mus musculus GN=Myh10 PE=1 SV=2 - [MYH10_MOUSE]	Q61879	26	53	12.6	29.5	1.025	1.033	1.4	2.3
693	Protein FAM126B OS=Mus musculus GN=Fam126b PE=2 SV=1 - [F126B_MOUSE]	Q8C729	2	7	5.09	14.53	1.026	0.964	11.5	3.3
694	Saccharopine dehydrogenase-like oxidoreductase OS=Mus musculus GN=Sccpdh PE=2 SV=1 - [SCPDL_MOUSE]	Q8R127	5	4	19.11	8.86	1.026	0.993	3.2	1
695	Synaptobrevin homolog YKT6 OS=Mus musculus GN=Ykt6 PE=2 SV=1 - [YKT6_MOUSE]	Q9CQW1	3	6	13.64	29.8	1.026	0.964	1.5	2.9
696	Synaptic vesicle glycoprotein 2B OS=Mus musculus GN=Sv2b PE=1 SV=1 - [SV2B_MOUSE]	Q8BG39	12	16	14.93	23.87	1.026	0.971	3.9	1.6
697	Protein kinase C alpha type OS=Mus musculus GN=Prkca PE=1 SV=3 - [KPCA_MOUSE]	P20444	10	13	14.29	18.3	1.026	1.091	2	2.2
698	Neuronal growth regulator 1 OS=Mus musculus GN=Negr1 PE=1 SV=1 - [NEGR1_MOUSE]	Q80Z24	7	5	25.57	17.82	1.026	1.008	6.8	1
699	Clathrin coat assembly protein AP180 OS=Mus musculus GN=Snap91 PE=1 SV=1 - [AP180_MOUSE]	Q61548	17	20	23.53	27.19	1.026	0.936	4.3	0.5
700	Aflatoxin B1 aldehyde reductase member 2 OS=Mus musculus GN=Akr7a2 PE=1 SV=3 - [ARK72_MOUSE]	Q8CG76	2	3	5.45	9.54	1.026	1.001	10.7	0.6
701	Alpha-enolase OS=Mus musculus GN=Eno1 PE=1 SV=3 - [ENOA_MOUSE]	P17182	32	31	71.89	67.05	1.026	0.973	0.7	0.4
702	Septin-9 OS=Mus musculus GN=Sept9 PE=1 SV=1 - [SEPT9_MOUSE]	Q80UG5	12	16	17.5	22.64	1.026	0.979	1.8	0.9
703	Lamin-B1 OS=Mus musculus GN=Lmnb1 PE=1 SV=3 - [LMNB1_MOUSE]	P14733	9	9	13.78	15.82	1.027	1.321	1.4	9.6
704	ATPase family AAA domain-containing protein 3 OS=Mus musculus GN=Atad3 PE=1 SV=1 - [ATAD3_MOUSE]	Q925I1	6	13	11.68	21.49	1.027	1.138	3.4	1.9
705	60S ribosomal protein L27 OS=Mus musculus GN=Rpl27 PE=1 SV=2 - [RL27_MOUSE]	P61358	7	8	52.94	58.82	1.027	0.971	4.3	3.3
706	Guanine nucleotide-binding protein G(I)/G(S)/G(T) subunit beta-1 OS=Mus musculus GN=Gnb1 PE=1 SV=3 - [GBB1_MOUSE]	P62874	11	13	25.88	32.35	1.027	0.87	4.9	5.5
707	Heat shock 70 kDa protein 4L OS=Mus musculus GN=Hspa4l PE=1 SV=2 - [HS74L_MOUSE]	P48722	14	18	16.23	21	1.027	1.025	4.2	2.2
708	Amine oxidase [flavin-containing] B OS=Mus musculus GN=Maob PE=1 SV=4 - [AOFB_MOUSE]	Q8BW75	12	11	21.15	18.27	1.028	1.148	2.6	7.3
709	Syntaxin-binding protein 1 OS=Mus musculus GN=Stxbp1 PE=1 SV=2 - [STXB1_MOUSE]	O08599	46	54	71.89	79.8	1.028	0.901	0.3	1.8
710	28S ribosomal protein S36, mitochondrial OS=Mus musculus GN=Mrps36 PE=2 SV=1 - [RT36_MOUSE]	Q9CQX8	4	3	39.22	38.24	1.028	0.994	4.3	12
711	Vesicle-fusing ATPase OS=Mus musculus GN=Nsf PE=1 SV=2 - [NSF_MOUSE]	P46460	56	60	68.15	68.01	1.028	1.081	0.8	1.4
712	ATP-binding cassette sub-family D member 3 OS=Mus musculus GN=Abcd3 PE=1 SV=2 - [ABCD3_MOUSE]	P55096	4	5	5.01	6.53	1.028	0.981	1.1	7.1
713	Clathrin heavy chain 1 OS=Mus musculus GN=Cltc PE=1 SV=3 - [CLH1_MOUSE]	Q68FD5	75	81	46.99	49.61	1.028	0.994	0.9	0.5
714	Dihydropyrimidinase-related protein 2 OS=Mus musculus GN=Dpysl2 PE=1 SV=2 - [DPYL2_MOUSE]	O08553	38	35	69.58	69.76	1.028	0.973	0.4	0.7
715	Regulator of microtubule dynamics protein 3 OS=Mus musculus GN=Rmdn3 PE=1 SV=2 - [RMD3_MOUSE]	Q3UJU9	3	4	9.79	8.94	1.029	1.024	4.1	7.4
716	Cytoplasmic dynein 1 heavy chain 1 OS=Mus musculus GN=Dync1h1 PE=1 SV=2 - [DYHC1_MOUSE]	Q9JHU4	69	110	15.65	26.25	1.029	1.005	1.2	0.9
717	Serine/threonine-protein kinase PAK 1 OS=Mus musculus GN=Pak1 PE=1 SV=1 - [PAK1_MOUSE]	O88643	5	10	10.64	18.72	1.029	0.986	2.9	1.2
718	Protein NipSnap homolog 2 OS=Mus musculus GN=Gbas PE=2 SV=1 - [NIPS2_MOUSE]	O55126	13	10	40.21	37.01	1.029	1.169	0.7	5.9
719	L-lactate dehydrogenase B chain OS=Mus musculus GN=Ldhb PE=1 SV=2 - [LDHB_MOUSE]	P16125	15	15	45.51	41.32	1.03	0.991	3	0.4
720	Src substrate cortactin OS=Mus musculus GN=Cttn PE=1 SV=2 - [SRC8_MOUSE]	Q60598	7	15	14.65	25.64	1.03	0.874	0.3	4.4
721	Neurabin-2 OS=Mus musculus GN=Ppp1r9b PE=1 SV=1 - [NEB2_MOUSE]	Q6R891	9	15	13.71	19.34	1.03	1.101	5.9	6.3
722	LanC-like protein 1 OS=Mus musculus GN=Lancl1 PE=1 SV=1 - [LANC1_MOUSE]	O89112	7	6	16.54	12.53	1.03	0.856	3.3	5.6
723	Phosphoglycerate kinase 1 OS=Mus musculus GN=Pgk1 PE=1 SV=4 - [PGK1_MOUSE]	P09411	26	27	59.95	54.44	1.03	0.922	1.1	1
724	Misshapen-like kinase 1 OS=Mus musculus GN=Mink1 PE=1 SV=3 - [MINK1_MOUSE]	Q9JM52	10	15	6.65	11.09	1.03	0.995	5.4	3.4
725	Atlastin-1 OS=Mus musculus GN=Atl1 PE=1 SV=1 - [ATLA1_MOUSE]	Q8BH66	10	13	21.51	26.52	1.031	1.005	5.4	0.6
726	Methyl-CpG-binding protein 2 OS=Mus musculus GN=Mecp2 PE=1 SV=1 - [MECP2_MOUSE]	Q9Z2D6	15	5	35.54	14.67	1.031	1.384	2.4	6.5
727	Kalirin OS=Mus musculus GN=Kalrn PE=1 SV=1 - [KALRN_MOUSE]	A2CG49	8	10	2.43	3.04	1.031	1.066	3.9	3.4
728	Histone H2AX OS=Mus musculus GN=H2afx PE=1 SV=2 - [H2AX_MOUSE]	P27661	13	12	58.04	69.23	1.031	1.543	1.2	11.9
729	60S ribosomal protein L10a OS=Mus musculus GN=Rpl10a PE=1 SV=3 - [RL10A_MOUSE]	P53026	6	10	25.35	30.88	1.031	1.084	1.9	2.4
730	Argininosuccinate synthase OS=Mus musculus GN=Ass1 PE=1 SV=1 - [ASSY_MOUSE]	P16460	5	10	9.22	18.93	1.031	0.989	1.4	1.3
731	Transitional endoplasmic reticulum ATPase OS=Mus musculus GN=Vcp PE=1 SV=4 - [TERA_MOUSE]	Q01853	35	31	43.8	35.61	1.031	0.953	3.2	0.3
732	Actin-related protein 3 OS=Mus musculus GN=Actr3 PE=1 SV=3 - [ARP3_MOUSE]	Q99JY9	10	15	30.38	33.97	1.031	0.954	6.1	2.8
733	ATP-citrate synthase OS=Mus musculus GN=Acly PE=1 SV=1 - [ACLY_MOUSE]	Q91V92	11	15	10.08	12.56	1.031	0.978	0.2	2.5
734	AP-2 complex subunit mu OS=Mus musculus GN=Ap2m1 PE=1 SV=1 - [AP2M1_MOUSE]	P84091	27	24	47.82	45.75	1.032	1	3.4	0.4
735	Annexin A6 OS=Mus musculus GN=Anxa6 PE=1 SV=3 - [ANXA6_MOUSE]	P14824	21	24	35.22	33.73	1.032	0.889	1.3	2.5
736	Gamma-aminobutyric acid receptor subunit beta-2 OS=Mus musculus GN=Gabrb2 PE=1 SV=2 - [GBRB2_MOUSE]	P63137	4	8	6.64	17.19	1.032	1.085	3.2	2.2
737	Synapsin-2 OS=Mus musculus GN=Syn2 PE=1 SV=2 - [SYN2_MOUSE]	Q64332	26	29	55.12	55.97	1.032	0.941	0.9	0.7
738	Ubiquinone biosynthesis protein COQ9, mitochondrial OS=Mus musculus GN=Coq9 PE=1 SV=1 - [COQ9_MOUSE]	Q8K1Z0	5	7	18.53	26.2	1.033	1.245	2.1	4.4
739	Armadillo repeat-containing protein 10 OS=Mus musculus GN=Armc10 PE=1 SV=1 - [ARM10_MOUSE]	Q9D0L7	5	5	18.95	16.34	1.033	1.085	8.3	2
740	Dihydropyrimidinase-related protein 3 OS=Mus musculus GN=Dpysl3 PE=1 SV=1 - [DPYL3_MOUSE]	Q62188	15	20	31.93	36.67	1.033	0.985	1	6.5
741	Citrate lyase subunit beta-like protein, mitochondrial OS=Mus musculus GN=Clybl PE=1 SV=2 - [CLYBL_MOUSE]	Q8R4N0	4	7	11.83	20.71	1.033	1.1	3.5	3.1
742	Acyl-coenzyme A thioesterase 11 OS=Mus musculus GN=Acot11 PE=2 SV=1 - [ACO11_MOUSE]	Q8VHQ9	2	5	7.58	9.09	1.033	1.104	4.3	11
743	V-type proton ATPase subunit C 1 OS=Mus musculus GN=Atp6v1c1 PE=1 SV=4 - [VATC1_MOUSE]	Q9Z1G3	23	24	46.07	51.05	1.033	0.896	2	3.2
744	Methylcrotonoyl-CoA carboxylase beta chain, mitochondrial OS=Mus musculus GN=Mccc2 PE=1 SV=1 - [MCCB_MOUSE]	Q3ULD5	5	3	8.7	5.15	1.034	1.218	12.6	0.8
745	Microtubule-associated protein RP/EB family member 3 OS=Mus musculus GN=Mapre3 PE=1 SV=1 - [MARE3_MOUSE]	Q6PER3	8	12	25.62	30.96	1.034	1.014	3.4	4
746	Dynamin-1-like protein OS=Mus musculus GN=Dnm1l PE=1 SV=2 - [DNM1L_MOUSE]	Q8K1M6	23	21	30.05	32.08	1.034	0.954	2.2	0.2
747	Cytochrome c1, heme protein, mitochondrial OS=Mus musculus GN=Cyc1 PE=1 SV=1 - [CY1_MOUSE]	Q9D0M3	12	11	48	32.92	1.034	1.097	0.2	3
748	NADH dehydrogenase [ubiquinone] 1 beta subcomplex subunit 11, mitochondrial OS=Mus musculus GN=Ndufb11 PE=1 SV=2 - [NDUBB_MOUSE]	O09111	6	6	51.66	49.01	1.034	1.092	6.5	6.9
749	Cytoplasmic FMR1-interacting protein 1 OS=Mus musculus GN=Cyfip1 PE=1 SV=1 - [CYFP1_MOUSE]	Q7TMB8	17	24	12.05	18.28	1.034	0.981	0.7	3.6
750	Protein kinase C epsilon type OS=Mus musculus GN=Prkce PE=1 SV=1 - [KPCE_MOUSE]	P16054	4	8	4.75	8.55	1.035	1.03	2.5	3.3
751	Polyadenylate-binding protein 1 OS=Mus musculus GN=Pabpc1 PE=1 SV=2 - [PABP1_MOUSE]	P29341	5	3	8.33	4.4	1.035	0.988	3.1	3.3
752	60S ribosomal protein L23 OS=Mus musculus GN=Rpl23 PE=1 SV=1 - [RL23_MOUSE]	P62830	3	3	23.57	18.57	1.035	0.941	3.6	9.3
753	Erlin-2 OS=Mus musculus GN=Erlin2 PE=1 SV=1 - [ERLN2_MOUSE]	Q8BFZ9	9	9	22.35	22.35	1.035	1.067	1.2	2.1
754	Glucose-6-phosphate isomerase OS=Mus musculus GN=Gpi PE=1 SV=4 - [G6PI_MOUSE]	P06745	31	35	60.39	60.39	1.035	0.923	2.6	0.7
755	Succinyl-CoA ligase [ADP/GDP-forming] subunit alpha, mitochondrial OS=Mus musculus GN=Suclg1 PE=1 SV=4 - [SUCA_MOUSE]	Q9WUM5	13	10	32.37	24.57	1.036	1.14	1.9	3.4
756	Protein SOGA3 OS=Mus musculus GN=Soga3 PE=2 SV=2 - [SOGA3_MOUSE]	Q6NZL0	4	16	4.55	16.19	1.036	0.941	4.2	5.9
757	Retinol dehydrogenase 14 OS=Mus musculus GN=Rdh14 PE=2 SV=1 - [RDH14_MOUSE]	Q9ERI6	6	6	20.66	20.66	1.036	1.058	5.9	4.6
758	Synaptosomal-associated protein 47 OS=Mus musculus GN=Snap47 PE=1 SV=1 - [SNP47_MOUSE]	Q8R570	7	8	27.6	28.57	1.036	1.119	3.3	2
759	Glycerol-3-phosphate dehydrogenase 1-like protein OS=Mus musculus GN=Gpd1l PE=1 SV=2 - [GPD1L_MOUSE]	Q3ULJ0	8	10	18.52	33.9	1.037	0.942	3	1
760	Cytoplasmic FMR1-interacting protein 2 OS=Mus musculus GN=Cyfip2 PE=1 SV=2 - [CYFP2_MOUSE]	Q5SQX6	27	37	20.91	28.33	1.037	0.907	2.9	2.7
761	Gamma-enolase OS=Mus musculus GN=Eno2 PE=1 SV=2 - [ENOG_MOUSE]	P17183	24	21	59.22	57.14	1.037	0.926	2.6	2.8
762	T-complex protein 1 subunit eta OS=Mus musculus GN=Cct7 PE=1 SV=1 - [TCPH_MOUSE]	P80313	5	7	9.93	15.44	1.037	0.938	2.9	2.3
763	Peripheral plasma membrane protein CASK OS=Mus musculus GN=Cask PE=1 SV=2 - [CSKP_MOUSE]	O70589	4	7	4.43	5.18	1.038	1.062	0.7	2.2
764	Protein lin-7 homolog C OS=Mus musculus GN=Lin7c PE=1 SV=2 - [LIN7C_MOUSE]	O88952	9	7	31.98	26.4	1.038	0.97	9.8	4.5
765	V-type proton ATPase subunit D OS=Mus musculus GN=Atp6v1d PE=1 SV=1 - [VATD_MOUSE]	P57746	14	13	60.32	59.92	1.038	0.909	2.6	3.4
766	Isocitrate dehydrogenase [NADP] cytoplasmic OS=Mus musculus GN=Idh1 PE=1 SV=2 - [IDHC_MOUSE]	O88844	11	13	20.77	22.46	1.038	1.006	1.7	1.2
767	Glyoxalase domain-containing protein 4 OS=Mus musculus GN=Glod4 PE=2 SV=1 - [GLOD4_MOUSE]	Q9CPV4	8	9	35.23	32.89	1.038	0.98	5.6	3.8
768	cAMP-dependent protein kinase catalytic subunit alpha OS=Mus musculus GN=Prkaca PE=1 SV=3 - [KAPCA_MOUSE]	P05132	13	16	30.2	38.46	1.038	0.862	3.4	2.4
769	Electron transfer flavoprotein subunit beta OS=Mus musculus GN=Etfb PE=1 SV=3 - [ETFB_MOUSE]	Q9DCW4	9	10	34.51	34.9	1.039	1.187	5.4	5.1
770	Cysteine desulfurase, mitochondrial OS=Mus musculus GN=Nfs1 PE=2 SV=3 - [NFS1_MOUSE]	Q9Z1J3	4	4	10.02	8.28	1.039	1.073	5.4	1.4
771	Inactive hydroxysteroid dehydrogenase-like protein 1 OS=Mus musculus GN=Hsdl1 PE=2 SV=1 - [HSDL1_MOUSE]	Q8BTX9	3	2	9.09	8.18	1.039	1.166	2.4
772	60S ribosomal protein L9 OS=Mus musculus GN=Rpl9 PE=2 SV=2 - [RL9_MOUSE]	P51410	5	6	15.1	22.4	1.04	1.082	5	2.7
773	NADH dehydrogenase [ubiquinone] flavoprotein 2, mitochondrial OS=Mus musculus GN=Ndufv2 PE=1 SV=2 - [NDUV2_MOUSE]	Q9D6J6	13	12	45.56	47.98	1.04	1.075	1.1	1
774	Uncharacterized protein KIAA1671 OS=Mus musculus GN=Kiaa1671 PE=2 SV=1 - [K1671_MOUSE]	Q8BRV5	4	4	12.66	12.99	1.04	1.052	6.9	4.6
775	Transmembrane protein 35 OS=Mus musculus GN=Tmem35 PE=2 SV=1 - [TMM35_MOUSE]	Q9D328	3	3	17.96	15.57	1.04	1.053	3.4	4.3
776	cAMP-dependent protein kinase catalytic subunit beta OS=Mus musculus GN=Prkacb PE=1 SV=2 - [KAPCB_MOUSE]	P68181	13	16	31.34	39.32	1.04	0.933	1	2.6
777	T-complex protein 1 subunit zeta OS=Mus musculus GN=Cct6a PE=1 SV=3 - [TCPZ_MOUSE]	P80317	9	16	18.46	29.76	1.04	0.918	1.5	1.8
778	RNA binding motif protein, X-linked-like-1 OS=Mus musculus GN=Rbmxl1 PE=1 SV=1 - [RMXL1_MOUSE]	Q91VM5	8	4	20.1	9.79	1.041	1.204	6.8	5.1
779	Mitogen-activated protein kinase 10 OS=Mus musculus GN=Mapk10 PE=1 SV=2 - [MK10_MOUSE]	Q61831	4	5	6.25	9.05	1.041	1.015	17.5	3.2
780	Cytosol aminopeptidase OS=Mus musculus GN=Lap3 PE=1 SV=3 - [AMPL_MOUSE]	Q9CPY7	12	12	22.16	24.28	1.041	1.046	2.4	1.9
781	Protein lifeguard 2 OS=Mus musculus GN=Faim2 PE=2 SV=1 - [LFG2_MOUSE]	Q8K097	3	2	13.88	11.99	1.041	1.062	6.4	4.4
782	NADH dehydrogenase [ubiquinone] iron-sulfur protein 3, mitochondrial OS=Mus musculus GN=Ndufs3 PE=1 SV=2 - [NDUS3_MOUSE]	Q9DCT2	16	17	61.6	58.56	1.042	1.142	2.1	3.1
783	Fatty-acid amide hydrolase 1 OS=Mus musculus GN=Faah PE=2 SV=1 - [FAAH1_MOUSE]	O08914	4	6	7.6	12.44	1.042	1.127	1.4	9.7
784	Homer protein homolog 1 OS=Mus musculus GN=Homer1 PE=1 SV=2 - [HOME1_MOUSE]	Q9Z2Y3	11	20	28.14	51.09	1.042	1.005	3.4	1.4
785	OCIA domain-containing protein 1 OS=Mus musculus GN=Ociad1 PE=1 SV=1 - [OCAD1_MOUSE]	Q9CRD0	2	4	16.6	17.81	1.043	1.065	12.7	0.1
786	GTP:AMP phosphotransferase AK3, mitochondrial OS=Mus musculus GN=Ak3 PE=1 SV=3 - [KAD3_MOUSE]	Q9WTP7	9	12	37.44	51.98	1.043	1.194	4.9	4.1
787	Heterogeneous nuclear ribonucleoproteins A2/B1 OS=Mus musculus GN=Hnrnpa2b1 PE=1 SV=2 - [ROA2_MOUSE]	O88569	6	8	16.71	22.95	1.043	1.094	3.4	3.4
788	Catenin alpha-2 OS=Mus musculus GN=Ctnna2 PE=1 SV=3 - [CTNA2_MOUSE]	Q61301	31	39	31.16	44.49	1.043	0.993	2.6	1.3
789	Peroxisomal multifunctional enzyme type 2 OS=Mus musculus GN=Hsd17b4 PE=1 SV=3 - [DHB4_MOUSE]	P51660	12	17	17.69	22.72	1.043	1.031	1.4	0.7
790	ATP-binding cassette sub-family B member 7, mitochondrial OS=Mus musculus GN=Abcb7 PE=1 SV=3 - [ABCB7_MOUSE]	Q61102	7	3	9.18	3.72	1.043	0.992	1.3	7.4
791	Catenin beta-1 OS=Mus musculus GN=Ctnnb1 PE=1 SV=1 - [CTNB1_MOUSE]	Q02248	23	24	33.03	33.67	1.043	0.972	2.6	1.1
792	Actin, cytoplasmic 1 OS=Mus musculus GN=Actb PE=1 SV=1 - [ACTB_MOUSE]	P60710	32	26	73.33	65.33	1.043	1.007	0.4	1
793	6-phosphofructokinase, liver type OS=Mus musculus GN=Pfkl PE=1 SV=4 - [K6PL_MOUSE]	P12382	19	22	26.15	29.62	1.044	0.986	1.9	3.6
794	Phosphatidylinositide phosphatase SAC1 OS=Mus musculus GN=Sacm1l PE=2 SV=1 - [SAC1_MOUSE]	Q9EP69	4	8	6.13	13.63	1.044	1.049	1.5	4.4
795	Putative adenosylhomocysteinase 3 OS=Mus musculus GN=Ahcyl2 PE=1 SV=1 - [SAHH3_MOUSE]	Q68FL4	10	11	15.66	15.82	1.044	0.945	3.7	1.2
796	V-type proton ATPase catalytic subunit A OS=Mus musculus GN=Atp6v1a PE=1 SV=2 - [VATA_MOUSE]	P50516	39	41	64.83	58.83	1.044	0.941	1.1	1
797	Protein NDRG2 OS=Mus musculus GN=Ndrg2 PE=1 SV=1 - [NDRG2_MOUSE]	Q9QYG0	11	12	37.74	46.09	1.044	1.053	2.2	1.1
798	Sorting and assembly machinery component 50 homolog OS=Mus musculus GN=Samm50 PE=1 SV=1 - [SAM50_MOUSE]	Q8BGH2	13	10	25.16	20.47	1.044	1.129	2	7.3
799	Prohibitin-2 OS=Mus musculus GN=Phb2 PE=1 SV=1 - [PHB2_MOUSE]	O35129	26	25	79.93	77.26	1.044	1.143	1.5	1.5
800	Ras-related protein Rab-5A OS=Mus musculus GN=Rab5a PE=1 SV=1 - [RAB5A_MOUSE]	Q9CQD1	8	8	36.74	44.19	1.045	1.057	3.8	1
801	Guanine deaminase OS=Mus musculus GN=Gda PE=1 SV=1 - [GUAD_MOUSE]	Q9R111	11	13	26.65	31.5	1.045	0.918	2.8	0.5
802	Histidine triad nucleotide-binding protein 2, mitochondrial OS=Mus musculus GN=Hint2 PE=1 SV=1 - [HINT2_MOUSE]	Q9D0S9	5	6	39.26	39.26	1.045	1.141	7.9	1.7
803	Amine oxidase [flavin-containing] A OS=Mus musculus GN=Maoa PE=1 SV=3 - [AOFA_MOUSE]	Q64133	14	13	25.86	22.43	1.045	1.086	3.3	1.2
804	Neurocalcin-delta OS=Mus musculus GN=Ncald PE=1 SV=4 - [NCALD_MOUSE]	Q91X97	9	9	35.23	46.63	1.046	0.851	9.7	4.2
805	Transforming protein RhoA OS=Mus musculus GN=Rhoa PE=1 SV=1 - [RHOA_MOUSE]	Q9QUI0	6	5	27.46	25.39	1.046	0.967	4.3	6.6
806	Fatty aldehyde dehydrogenase OS=Mus musculus GN=Aldh3a2 PE=2 SV=2 - [AL3A2_MOUSE]	P47740	8	11	12.19	20.87	1.046	1.034	4.8	6
807	Peptidyl-prolyl cis-trans isomerase D OS=Mus musculus GN=Ppid PE=1 SV=3 - [PPID_MOUSE]	Q9CR16	6	11	14.05	25.95	1.046	0.912	1.7	2.1
808	Thiosulfate sulfurtransferase OS=Mus musculus GN=Tst PE=1 SV=3 - [THTR_MOUSE]	P52196	6	9	18.86	28.62	1.046	1.224	3.6	2.5
809	Band 4.1-like protein 1 OS=Mus musculus GN=Epb41l1 PE=1 SV=2 - [E41L1_MOUSE]	Q9Z2H5	15	20	16.38	21.84	1.046	0.98	1.9	4
810	NAD(P) transhydrogenase, mitochondrial OS=Mus musculus GN=Nnt PE=1 SV=2 - [NNTM_MOUSE]	Q61941	12	3	10.59	2.58	1.046	1.131	2.3	1.1
811	Mitochondrial import inner membrane translocase subunit TIM50 OS=Mus musculus GN=Timm50 PE=1 SV=1 - [TIM50_MOUSE]	Q9D880	6	5	17.56	15.58	1.046	1.091	10.1	5.6
812	Pyruvate dehydrogenase protein X component, mitochondrial OS=Mus musculus GN=Pdhx PE=2 SV=1 - [ODPX_MOUSE]	Q8BKZ9	17	13	29.34	24.15	1.047	1.165	0.2	2.3
813	Epimerase family protein SDR39U1 OS=Mus musculus GN=Sdr39u1 PE=2 SV=1 - [D39U1_MOUSE]	Q5M8N4	5	3	15.91	11.36	1.047	1.172	1.4	3.9
814	Flotillin-1 OS=Mus musculus GN=Flot1 PE=1 SV=1 - [FLOT1_MOUSE]	O08917	16	19	32.94	46.5	1.047	1.013	4.7	3.3
815	RasGAP-activating-like protein 1 OS=Mus musculus GN=Rasal1 PE=2 SV=2 - [RASL1_MOUSE]	Q9Z268	11	14	14.39	18.27	1.047	0.981	1.3	2
816	WD repeat-containing protein 7 OS=Mus musculus GN=Wdr7 PE=1 SV=3 - [WDR7_MOUSE]	Q920I9	11	19	6.45	13.1	1.047	1.016	3.5	0.9
817	Lamin-B2 OS=Mus musculus GN=Lmnb2 PE=1 SV=2 - [LMNB2_MOUSE]	P21619	14	13	23.15	20.64	1.047	1.178	1.7	4.2
818	MAP kinase-activating death domain protein OS=Mus musculus GN=Madd PE=1 SV=2 - [MADD_MOUSE]	Q80U28	5	6	3.23	4.5	1.047	1.029	7.1	6.6
819	Trifunctional enzyme subunit alpha, mitochondrial OS=Mus musculus GN=Hadha PE=1 SV=1 - [ECHA_MOUSE]	Q8BMS1	27	21	43.38	33.16	1.047	1.261	0.7	3.2
820	Centromere protein V OS=Mus musculus GN=Cenpv PE=2 SV=2 - [CENPV_MOUSE]	Q9CXS4	5	2	22.62	8.73	1.047	1.19	1.2	4.6
821	4-trimethylaminobutyraldehyde dehydrogenase OS=Mus musculus GN=Aldh9a1 PE=1 SV=1 - [AL9A1_MOUSE]	Q9JLJ2	2	5	4.66	10.53	1.047	1.096	6.9	3.9
822	Heat shock protein HSP 90-alpha OS=Mus musculus GN=Hsp90aa1 PE=1 SV=4 - [HS90A_MOUSE]	P07901	32	39	36.43	43.79	1.047	0.949	2.6	2.7
823	Ganglioside-induced differentiation-associated protein 1 OS=Mus musculus GN=Gdap1 PE=1 SV=1 - [GDAP1_MOUSE]	O88741	11	14	26.82	30.17	1.047	1.126	1.7	0.7
824	Talin-2 OS=Mus musculus GN=Tln2 PE=1 SV=3 - [TLN2_MOUSE]	Q71LX4	10	11	3.71	4.17	1.047	1.017	4.6	2.3
825	Importin subunit beta-1 OS=Mus musculus GN=Kpnb1 PE=1 SV=2 - [IMB1_MOUSE]	P70168	9	11	12.1	15.3	1.048	0.983	4.1	0.8
826	F-actin-capping protein subunit alpha-2 OS=Mus musculus GN=Capza2 PE=1 SV=3 - [CAZA2_MOUSE]	P47754	7	12	39.51	46.85	1.048	1.025	2.3	1
827	Peptidyl-prolyl cis-trans isomerase FKBP8 OS=Mus musculus GN=Fkbp8 PE=1 SV=2 - [FKBP8_MOUSE]	O35465	2	5	3.73	12.19	1.048	1.045	9.8	3.1
828	Elongation factor 2 OS=Mus musculus GN=Eef2 PE=1 SV=2 - [EF2_MOUSE]	P58252	10	16	13.29	23.08	1.048	0.995	1.8	3.4
829	Copine-6 OS=Mus musculus GN=Cpne6 PE=2 SV=1 - [CPNE6_MOUSE]	Q9Z140	16	19	28.19	30.52	1.048	0.976	0.8	2
830	Nck-associated protein 1 OS=Mus musculus GN=Nckap1 PE=1 SV=2 - [NCKP1_MOUSE]	P28660	24	24	21.63	21.1	1.048	0.937	1.1	1.3
831	Glycerol-3-phosphate dehydrogenase, mitochondrial OS=Mus musculus GN=Gpd2 PE=1 SV=2 - [GPDM_MOUSE]	Q64521	34	33	48.42	48.42	1.049	1.164	1.5	1.2
832	Protein SCAI OS=Mus musculus GN=Scai PE=1 SV=2 - [SCAI_MOUSE]	Q8C8N2	8	15	12.87	24.75	1.049	0.986	2.7	4.5
833	DnaJ homolog subfamily A member 2 OS=Mus musculus GN=Dnaja2 PE=1 SV=1 - [DNJA2_MOUSE]	Q9QYJ0	5	7	14.32	17.96	1.049	0.954	5.3	2.5
834	Putative adenosylhomocysteinase 2 OS=Mus musculus GN=Ahcyl1 PE=1 SV=1 - [SAHH2_MOUSE]	Q80SW1	12	20	21.7	30	1.05	1.006	5	0.5
835	NADP-dependent malic enzyme, mitochondrial OS=Mus musculus GN=Me3 PE=1 SV=2 - [MAON_MOUSE]	Q8BMF3	9	8	15.56	14.24	1.05	1.109	2.4	3.9
836	Dehydrogenase/reductase SDR family member 7B OS=Mus musculus GN=Dhrs7b PE=2 SV=1 - [DRS7B_MOUSE]	Q99J47	3	3	10.53	10.53	1.05	1.083	3.9	2.6
837	Intersectin-1 OS=Mus musculus GN=Itsn1 PE=1 SV=2 - [ITSN1_MOUSE]	Q9Z0R4	7	9	3.33	4.14	1.05	1.021		7
838	Acyl-CoA dehydrogenase family member 9, mitochondrial OS=Mus musculus GN=Acad9 PE=1 SV=2 - [ACAD9_MOUSE]	Q8JZN5	8	9	12.48	12.96	1.051	1.124	2.7	2.8
839	Glycerol-3-phosphate dehydrogenase [NAD(+)], cytoplasmic OS=Mus musculus GN=Gpd1 PE=1 SV=3 - [GPDA_MOUSE]	P13707	8	6	17.48	13.18	1.051	0.942	3.8	4.8
840	Cullin-associated NEDD8-dissociated protein 1 OS=Mus musculus GN=Cand1 PE=2 SV=2 - [CAND1_MOUSE]	Q6ZQ38	17	22	16.26	20.65	1.051	0.928	1.6	3.4
841	Heat shock protein 75 kDa, mitochondrial OS=Mus musculus GN=Trap1 PE=1 SV=1 - [TRAP1_MOUSE]	Q9CQN1	6	5	8.78	5.81	1.051	1.152	5.8	7.5
842	Proteasome subunit alpha type-2 OS=Mus musculus GN=Psma2 PE=1 SV=3 - [PSA2_MOUSE]	P49722	3	6	14.53	40.6	1.051	0.965	7	3.5
843	NADH dehydrogenase [ubiquinone] 1 alpha subcomplex subunit 13 OS=Mus musculus GN=Ndufa13 PE=1 SV=3 - [NDUAD_MOUSE]	Q9ERS2	10	7	52.08	50	1.052	1.164	0.5	1.3
844	Very-long-chain (3R)-3-hydroxyacyl-[acyl-carrier protein] dehydratase 3 OS=Mus musculus GN=ptplad1 PE=1 SV=2 - [HACD3_MOUSE]	Q8K2C9	5	6	19.06	19.34	1.052	0.909	2.9	6.8
845	Beta-adducin OS=Mus musculus GN=Add2 PE=1 SV=4 - [ADDB_MOUSE]	Q9QYB8	8	13	9.38	15.45	1.052	0.984	7.6	2.8
846	Phosphatidylinositol 4-phosphate 5-kinase type-1 gamma OS=Mus musculus GN=Pip5k1c PE=1 SV=2 - [PI51C_MOUSE]	O70161	12	16	24.21	23.45	1.053	0.945	4.8	3.1
847	Casein kinase II subunit alpha OS=Mus musculus GN=Csnk2a1 PE=1 SV=2 - [CSK21_MOUSE]	Q60737	10	9	40.92	35.55	1.053	1.008	1.9	5
848	Fructose-bisphosphate aldolase A OS=Mus musculus GN=Aldoa PE=1 SV=2 - [ALDOA_MOUSE]	P05064	30	30	58.24	69.51	1.053	0.875	0.7	1.6
849	T-complex protein 1 subunit beta OS=Mus musculus GN=Cct2 PE=1 SV=4 - [TCPB_MOUSE]	P80314	12	16	26.54	32.9	1.054	0.934	1.8	2
850	Transaldolase OS=Mus musculus GN=Taldo1 PE=1 SV=2 - [TALDO_MOUSE]	Q93092	4	4	11.28	9.79	1.054	0.866	1	6.2
851	T-complex protein 1 subunit theta OS=Mus musculus GN=Cct8 PE=1 SV=3 - [TCPQ_MOUSE]	P42932	12	21	21.9	39.42	1.054	0.89	2.5	0.9
852	Dolichyl-diphosphooligosaccharide--protein glycosyltransferase subunit 2 OS=Mus musculus GN=Rpn2 PE=2 SV=1 - [RPN2_MOUSE]	Q9DBG6	4	8	9.03	16.01	1.055	1.103	9	3.9
853	Apolipoprotein E OS=Mus musculus GN=Apoe PE=1 SV=2 - [APOE_MOUSE]	P08226	7	10	24.12	31.51	1.055	0.943	4	2.7
854	Rho GTPase-activating protein 1 OS=Mus musculus GN=Arhgap1 PE=1 SV=1 - [RHG01_MOUSE]	Q5FWK3	5	5	11.62	10.71	1.055	0.966	0.5	5.2
855	Synaptic vesicle membrane protein VAT-1 homolog OS=Mus musculus GN=Vat1 PE=1 SV=3 - [VAT1_MOUSE]	Q62465	5	6	15.76	20.2	1.055	0.928	4.1	1
856	Methylmalonate-semialdehyde dehydrogenase [acylating], mitochondrial OS=Mus musculus GN=Aldh6a1 PE=1 SV=1 - [MMSA_MOUSE]	Q9EQ20	18	17	32.52	35.33	1.055	1.219	1.3	3.5
857	Protein NipSnap homolog 1 OS=Mus musculus GN=Nipsnap1 PE=1 SV=1 - [NIPS1_MOUSE]	O55125	14	11	39.79	33.45	1.055	1.052	1.9	0.9
858	Voltage-gated potassium channel subunit beta-2 OS=Mus musculus GN=Kcnab2 PE=2 SV=1 - [KCAB2_MOUSE]	P62482	14	19	43.05	44.14	1.055	0.933	1.2	0.9
859	AP-3 complex subunit delta-1 OS=Mus musculus GN=Ap3d1 PE=1 SV=1 - [AP3D1_MOUSE]	O54774	3	2	3.17	3.09	1.056	1	5.8	2.6
860	Calcium-binding protein 39 OS=Mus musculus GN=Cab39 PE=1 SV=2 - [CAB39_MOUSE]	Q06138	4	6	9.68	14.08	1.056	0.94	4.3	7.9
861	Neutral alpha-glucosidase AB OS=Mus musculus GN=Ganab PE=1 SV=1 - [GANAB_MOUSE]	Q8BHN3	12	13	14.62	16	1.057	1.053	1.7	1.7
862	Histone H1.1 OS=Mus musculus GN=Hist1h1a PE=1 SV=2 - [H11_MOUSE]	P43275	12	11	36.62	39.91	1.057	1.492	5.5	7.2
863	Mitochondrial import inner membrane translocase subunit TIM44 OS=Mus musculus GN=Timm44 PE=2 SV=2 - [TIM44_MOUSE]	O35857	6	4	13.72	9.07	1.057	1.069	4.6	15.9
864	60S ribosomal protein L34 OS=Mus musculus GN=Rpl34 PE=3 SV=2 - [RL34_MOUSE]	Q9D1R9	3	4	18.8	26.5	1.057	0.999	0.7	0.6
865	NADH dehydrogenase [ubiquinone] 1 beta subcomplex subunit 6 OS=Mus musculus GN=Ndufb6 PE=1 SV=3 - [NDUB6_MOUSE]	Q3UIU2	4	4	36.72	32.81	1.057	1.011	2.6	2.1
866	ATP synthase subunit O, mitochondrial OS=Mus musculus GN=Atp5o PE=1 SV=1 - [ATPO_MOUSE]	Q9DB20	15	12	53.99	46.48	1.057	1.162	1.1	1
867	Endoplasmin OS=Mus musculus GN=Hsp90b1 PE=1 SV=2 - [ENPL_MOUSE]	P08113	23	27	22.57	29.43	1.057	1.06	4.1	0.4
868	NADH dehydrogenase [ubiquinone] 1 alpha subcomplex subunit 7 OS=Mus musculus GN=Ndufa7 PE=1 SV=3 - [NDUA7_MOUSE]	Q9Z1P6	11	11	61.95	74.34	1.058	1.134	1.6	3.3
869	PH and SEC7 domain-containing protein 3 OS=Mus musculus GN=Psd3 PE=1 SV=2 - [PSD3_MOUSE]	Q2PFD7	11	12	10.03	12.44	1.058	1.038	4.8	2.6
870	NADPH--cytochrome P450 reductase OS=Mus musculus GN=Por PE=1 SV=2 - [NCPR_MOUSE]	P37040	9	11	12.68	17.7	1.058	1.002	7.2	2.6
871	Probable ATP-dependent RNA helicase DDX5 OS=Mus musculus GN=Ddx5 PE=1 SV=2 - [DDX5_MOUSE]	Q61656	6	11	9.28	17.75	1.058	1.09	0.8	0.6
872	T-complex protein 1 subunit delta OS=Mus musculus GN=Cct4 PE=1 SV=3 - [TCPD_MOUSE]	P80315	8	13	14.84	28.39	1.058	0.963	4.1	2.1
873	ATP synthase subunit gamma, mitochondrial OS=Mus musculus GN=Atp5c1 PE=1 SV=1 - [ATPG_MOUSE]	Q91VR2	22	19	58.39	58.05	1.059	1.171	1.2	2.2
874	Microtubule-associated proteins 1A/1B light chain 3A OS=Mus musculus GN=Map1lc3a PE=1 SV=1 - [MLP3A_MOUSE]	Q91VR7	4	4	24.79	24.79	1.059	0.927	2.9	2.9
875	Major prion protein OS=Mus musculus GN=Prnp PE=1 SV=2 - [PRIO_MOUSE]	P04925	4	6	10.24	17.72	1.059	0.963	6.6	3.5
876	Carbonyl reductase [NADPH] 1 OS=Mus musculus GN=Cbr1 PE=1 SV=3 - [CBR1_MOUSE]	P48758	7	9	32.13	34.66	1.059	0.935	4.6	7.2
877	Neurobeachin OS=Mus musculus GN=Nbea PE=2 SV=1 - [NBEA_MOUSE]	Q9EPN1	5	5	1.4	1.23	1.059	0.952	2	0.6
878	V-type proton ATPase subunit B, brain isoform OS=Mus musculus GN=Atp6v1b2 PE=1 SV=1 - [VATB2_MOUSE]	P62814	28	30	60.47	61.45	1.06	0.95	1.2	0.8
879	Dynamin-like 120 kDa protein, mitochondrial OS=Mus musculus GN=Opa1 PE=1 SV=1 - [OPA1_MOUSE]	P58281	37	35	44.48	38.96	1.06	1.15	2.7	2.1
880	Calcium uptake protein 3, mitochondrial OS=Mus musculus GN=Micu3 PE=2 SV=2 - [MICU3_MOUSE]	Q9CTY5	5	5	8.41	9.56	1.06	1.136	4.2	4.7
881	Ferrochelatase, mitochondrial OS=Mus musculus GN=Fech PE=1 SV=2 - [HEMH_MOUSE]	P22315	11	6	24.29	15	1.061	1.085	1.2	2.8
882	Sideroflexin-1 OS=Mus musculus GN=Sfxn1 PE=1 SV=3 - [SFXN1_MOUSE]	Q99JR1	12	8	38.82	27.95	1.061	1.165	2.5	2.8
883	Calcium-binding mitochondrial carrier protein Aralar1 OS=Mus musculus GN=Slc25a12 PE=1 SV=1 - [CMC1_MOUSE]	Q8BH59	34	30	64.25	49.19	1.061	1.18	0.6	2
884	60S ribosomal protein L28 OS=Mus musculus GN=Rpl28 PE=1 SV=2 - [RL28_MOUSE]	P41105	6	12	33.58	55.47	1.062	1.033	1	4
885	Aldehyde dehydrogenase X, mitochondrial OS=Mus musculus GN=Aldh1b1 PE=1 SV=1 - [AL1B1_MOUSE]	Q9CZS1	10	9	14.84	12.33	1.062	1.166	3.9	9.9
886	Elongation factor 1-gamma OS=Mus musculus GN=Eef1g PE=1 SV=3 - [EF1G_MOUSE]	Q9D8N0	4	6	7.32	11.44	1.062	1.053	5.1	5.1
887	Calcium/calmodulin-dependent protein kinase type II subunit beta OS=Mus musculus GN=Camk2b PE=1 SV=2 - [KCC2B_MOUSE]	P28652	31	35	58.86	65.68	1.062	1.054	2.4	0
888	Spectrin beta chain, non-erythrocytic 1 OS=Mus musculus GN=Sptbn1 PE=1 SV=2 - [SPTB2_MOUSE]	Q62261	146	159	59.63	63.01	1.062	0.997	1.3	1
889	Dihydrolipoyl dehydrogenase, mitochondrial OS=Mus musculus GN=Dld PE=1 SV=2 - [DLDH_MOUSE]	O08749	25	25	41.26	43.61	1.062	1.193	2.4	1.8
890	T-complex protein 1 subunit alpha OS=Mus musculus GN=Tcp1 PE=1 SV=3 - [TCPA_MOUSE]	P11983	9	9	15.29	16.73	1.062	0.918	4.1	3.4
891	Monofunctional C1-tetrahydrofolate synthase, mitochondrial OS=Mus musculus GN=Mthfd1l PE=1 SV=2 - [C1TM_MOUSE]	Q3V3R1	8	6	8.8	6.96	1.062	1.132	5.5	4.6
892	Elongation factor Tu, mitochondrial OS=Mus musculus GN=Tufm PE=1 SV=1 - [EFTU_MOUSE]	Q8BFR5	20	21	46.68	51.99	1.063	1.172	1.6	1.6
893	Rap guanine nucleotide exchange factor 4 OS=Mus musculus GN=Rapgef4 PE=1 SV=1 - [RPGF4_MOUSE]	Q9EQZ6	15	12	15.92	10.29	1.064	1.012	1.6	3.4
894	Receptor-type tyrosine-protein phosphatase N2 OS=Mus musculus GN=Ptprn2 PE=1 SV=2 - [PTPR2_MOUSE]	P80560	4	5	3.7	5.99	1.064	0.97	4.3	7.4
895	NADH-cytochrome b5 reductase 1 OS=Mus musculus GN=Cyb5r1 PE=2 SV=1 - [NB5R1_MOUSE]	Q9DB73	8	7	25.25	24.92	1.064	1.044	3.8	2.8
896	Very long-chain specific acyl-CoA dehydrogenase, mitochondrial OS=Mus musculus GN=Acadvl PE=1 SV=3 - [ACADV_MOUSE]	P50544	5	3	9.76	4.88	1.064	1.227	1.8	7.3
897	Sideroflexin-5 OS=Mus musculus GN=Sfxn5 PE=1 SV=2 - [SFXN5_MOUSE]	Q925N0	11	10	30.7	22.51	1.064	1.193	2.3	3
898	Cytochrome b-c1 complex subunit 2, mitochondrial OS=Mus musculus GN=Uqcrc2 PE=1 SV=1 - [QCR2_MOUSE]	Q9DB77	26	27	64.24	64.46	1.065	1.128	0.9	0.9
899	60S acidic ribosomal protein P0 OS=Mus musculus GN=Rplp0 PE=1 SV=3 - [RLA0_MOUSE]	P14869	3	7	9.46	27.13	1.065	1.109	3.3	3.4
900	Sideroflexin-3 OS=Mus musculus GN=Sfxn3 PE=1 SV=1 - [SFXN3_MOUSE]	Q91V61	16	13	51.4	42.99	1.065	1.083	3.4	1.5
901	GTP-binding nuclear protein Ran OS=Mus musculus GN=Ran PE=1 SV=3 - [RAN_MOUSE]	P62827	5	6	24.54	26.39	1.065	0.998	3	3
902	Isovaleryl-CoA dehydrogenase, mitochondrial OS=Mus musculus GN=Ivd PE=1 SV=1 - [IVD_MOUSE]	Q9JHI5	12	6	29.95	12.26	1.065	1.423	1	3.6
903	Peptidyl-prolyl cis-trans isomerase B OS=Mus musculus GN=Ppib PE=2 SV=2 - [PPIB_MOUSE]	P24369	11	11	43.52	46.76	1.065	1.055	1.5	0.3
904	Acyl-coenzyme A thioesterase 13 OS=Mus musculus GN=Acot13 PE=1 SV=1 - [ACO13_MOUSE]	Q9CQR4	4	5	24.29	32.14	1.065	1.213	2.3	1.5
905	Iron-sulfur cluster assembly 2 homolog, mitochondrial OS=Mus musculus GN=Isca2 PE=2 SV=2 - [ISCA2_MOUSE]	Q9DCB8	2	2	20.78	20.78	1.065	1.045	7.4	2.5
906	Carboxypeptidase E OS=Mus musculus GN=Cpe PE=1 SV=2 - [CBPE_MOUSE]	Q00493	11	14	23.32	30.25	1.065	0.967	2.7	2
907	Glial fibrillary acidic protein OS=Mus musculus GN=Gfap PE=1 SV=4 - [GFAP_MOUSE]	P03995	22	29	49.3	59.3	1.065	0.818	1.6	1.8
908	FXYD domain-containing ion transport regulator 6 OS=Mus musculus GN=Fxyd6 PE=1 SV=2 - [FXYD6_MOUSE]	Q9D164	2	3	40.43	40.43	1.065	0.953	3.5	3.4
909	AP-2 complex subunit alpha-1 OS=Mus musculus GN=Ap2a1 PE=1 SV=1 - [AP2A1_MOUSE]	P17426	34	43	34.39	48.62	1.066	0.961	0.7	0.7
910	Propionyl-CoA carboxylase beta chain, mitochondrial OS=Mus musculus GN=Pccb PE=1 SV=2 - [PCCB_MOUSE]	Q99MN9	12	7	30.68	14.6	1.066	1.185	1.8	3.4
911	Obg-like ATPase 1 OS=Mus musculus GN=Ola1 PE=1 SV=1 - [OLA1_MOUSE]	Q9CZ30	3	5	7.32	13.13	1.066	0.946	5.4	1.9
912	Dynamin-1 OS=Mus musculus GN=Dnm1 PE=1 SV=2 - [DYN1_MOUSE]	P39053	65	74	65.63	66.44	1.066	0.98	0.8	0.4
913	Adenylate kinase 4, mitochondrial OS=Mus musculus GN=Ak4 PE=1 SV=1 - [KAD4_MOUSE]	Q9WUR9	9	7	40.81	29.15	1.066	1.215	2.7	4.5
914	DnaJ homolog subfamily A member 1 OS=Mus musculus GN=Dnaja1 PE=1 SV=1 - [DNJA1_MOUSE]	P63037	10	11	16.12	33	1.067	1.039	3.9	3.6
915	Apoptosis-inducing factor 1, mitochondrial OS=Mus musculus GN=Aifm1 PE=1 SV=1 - [AIFM1_MOUSE]	Q9Z0X1	13	8	23.86	12.58	1.067	1.111	1	6.6
916	Guanine nucleotide-binding protein subunit beta-5 OS=Mus musculus GN=Gnb5 PE=1 SV=1 - [GBB5_MOUSE]	P62881	4	7	10.13	15.7	1.067	0.922	5.1	4.8
917	Myotubularin-related protein 5 OS=Mus musculus GN=Sbf1 PE=1 SV=2 - [MTMR5_MOUSE]	Q6ZPE2	6	9	2.84	5.2	1.068	0.98	2.1	2.4
918	Alpha-1,3/1,6-mannosyltransferase ALG2 OS=Mus musculus GN=Alg2 PE=2 SV=2 - [ALG2_MOUSE]	Q9DBE8	6	6	16.14	16.39	1.068	1.07	7.5	2.4
919	Fructose-bisphosphate aldolase C OS=Mus musculus GN=Aldoc PE=1 SV=4 - [ALDOC_MOUSE]	P05063	21	26	46.56	58.68	1.069	1.068	2.7	0.5
920	Stress-70 protein, mitochondrial OS=Mus musculus GN=Hspa9 PE=1 SV=3 - [GRP75_MOUSE]	P38647	35	36	47.42	52.58	1.069	1.207	0.1	2.1
921	60S ribosomal protein L11 OS=Mus musculus GN=Rpl11 PE=1 SV=4 - [RL11_MOUSE]	Q9CXW4	4	5	17.98	23.03	1.069	1.146	2.7	2.4
922	Aspartoacylase OS=Mus musculus GN=Aspa PE=1 SV=2 - [ACY2_MOUSE]	Q8R3P0	3	3	9.94	9.94	1.069	0.938	9.6	4.1
923	LETM1 and EF-hand domain-containing protein 1, mitochondrial OS=Mus musculus GN=Letm1 PE=2 SV=1 - [LETM1_MOUSE]	Q9Z2I0	19	18	27.37	28.32	1.069	1.141	3	1.8
924	V-type proton ATPase 116 kDa subunit a isoform 1 OS=Mus musculus GN=Atp6v0a1 PE=1 SV=3 - [VPP1_MOUSE]	Q9Z1G4	32	33	30.39	33.13	1.069	1.027	0.4	0.9
925	3-ketoacyl-CoA thiolase, mitochondrial OS=Mus musculus GN=Acaa2 PE=1 SV=3 - [THIM_MOUSE]	Q8BWT1	10	8	27.2	21.16	1.069	1.123	1.5	11.5
926	ATP-dependent (S)-NAD(P)H-hydrate dehydratase OS=Mus musculus GN=Carkd PE=1 SV=1 - [NNRD_MOUSE]	Q9CZ42	3	3	5.54	10.79	1.069	1.125	2.7	2.9
927	Mitochondrial import receptor subunit TOM70 OS=Mus musculus GN=Tomm70a PE=1 SV=2 - [TOM70_MOUSE]	Q9CZW5	15	19	19.64	27.17	1.07	1.074	0.2	3.4
928	2-oxoglutarate dehydrogenase, mitochondrial OS=Mus musculus GN=Ogdh PE=1 SV=3 - [ODO1_MOUSE]	Q60597	23	31	23.26	30.5	1.07	1.223	2.3	2
929	N(G),N(G)-dimethylarginine dimethylaminohydrolase 1 OS=Mus musculus GN=Ddah1 PE=1 SV=3 - [DDAH1_MOUSE]	Q9CWS0	7	10	28.77	35.09	1.07	1.078	5	3.2
930	cGMP-dependent 3',5'-cyclic phosphodiesterase OS=Mus musculus GN=Pde2a PE=1 SV=3 - [PDE2A_MOUSE]	Q922S4	8	16	11.14	22.82	1.071	0.93	1.9	4.5
931	Solute carrier family 25 member 46 OS=Mus musculus GN=Slc25a46 PE=1 SV=1 - [S2546_MOUSE]	Q9CQS4	6	4	13.4	8.37	1.071	1.124	7	0.7
932	Tyrosine-protein phosphatase non-receptor type 9 OS=Mus musculus GN=Ptpn9 PE=1 SV=2 - [PTN9_MOUSE]	O35239	5	5	6.41	7.08	1.072	0.99	2.5	1
933	AP-2 complex subunit alpha-2 OS=Mus musculus GN=Ap2a2 PE=1 SV=2 - [AP2A2_MOUSE]	P17427	39	46	41.26	50.53	1.072	0.967	3.5	0.5
934	Mitochondrial inner membrane protein OS=Mus musculus GN=Immt PE=1 SV=1 - [IMMT_MOUSE]	Q8CAQ8	57	59	64.99	67.11	1.072	1.221	0.9	0.6
935	Heat shock protein HSP 90-beta OS=Mus musculus GN=Hsp90ab1 PE=1 SV=3 - [HS90B_MOUSE]	P11499	28	36	35.91	40.06	1.072	0.959	1.6	0.7
936	NAD(P)H-hydrate epimerase OS=Mus musculus GN=Apoa1bp PE=1 SV=1 - [NNRE_MOUSE]	Q8K4Z3	6	3	30.85	9.57	1.073	1.048	4.6	2.6
937	Neuronal-specific septin-3 OS=Mus musculus GN=Sept3 PE=1 SV=2 - [SEPT3_MOUSE]	Q9Z1S5	12	13	28	28.86	1.073	0.954	2.3	1.6
938	Caskin-1 OS=Mus musculus GN=Caskin1 PE=1 SV=2 - [CSKI1_MOUSE]	Q6P9K8	12	11	12.3	10.48	1.073	1.139	4	3.9
939	NADH dehydrogenase [ubiquinone] iron-sulfur protein 2, mitochondrial OS=Mus musculus GN=Ndufs2 PE=1 SV=1 - [NDUS2_MOUSE]	Q91WD5	24	26	60.26	66.52	1.074	1.105	1.9	0.7
940	Protein disulfide-isomerase OS=Mus musculus GN=P4hb PE=1 SV=2 - [PDIA1_MOUSE]	P09103	23	22	40.47	42.04	1.074	1.037	1.5	1.6
941	Long-chain-fatty-acid--CoA ligase ACSBG1 OS=Mus musculus GN=Acsbg1 PE=1 SV=1 - [ACBG1_MOUSE]	Q99PU5	7	14	12.34	20.11	1.074	1.057	0.7	1.1
942	Transferrin receptor protein 1 OS=Mus musculus GN=Tfrc PE=1 SV=1 - [TFR1_MOUSE]	Q62351	3	2	4.46	2.1	1.074	1.046	14.7	4.1
943	Myosin-14 OS=Mus musculus GN=Myh14 PE=1 SV=1 - [MYH14_MOUSE]	Q6URW6	12	20	4.9	8.2	1.075	1.043	6.3	2.3
944	Glycerol kinase OS=Mus musculus GN=Gk PE=2 SV=2 - [GLPK_MOUSE]	Q64516	11	8	20.93	13.6	1.075	1.163	0.5	4.5
945	Engulfment and cell motility protein 2 OS=Mus musculus GN=Elmo2 PE=1 SV=1 - [ELMO2_MOUSE]	Q8BHL5	12	13	15.16	18.03	1.076	1.019	3.3	1.5
946	Putative ATP-dependent Clp protease proteolytic subunit, mitochondrial OS=Mus musculus GN=Clpp PE=1 SV=1 - [CLPP_MOUSE]	O88696	3	3	13.6	13.97	1.077	1.199	3.1	2.4
947	AFG3-like protein 2 OS=Mus musculus GN=Afg3l2 PE=1 SV=1 - [AFG32_MOUSE]	Q8JZQ2	12	11	12.84	11.1	1.077	1.191	1.7	4.3
948	Dihydrolipoyllysine-residue succinyltransferase component of 2-oxoglutarate dehydrogenase complex, mitochondrial OS=Mus musculus GN=Dlst PE=1 SV=1 - [ODO2_MOUSE]	Q9D2G2	14	14	31.72	29.96	1.077	1.229	1.4	2.4
949	Ig gamma-2A chain C region secreted form OS=Mus musculus PE=1 SV=1 - [GCAB_MOUSE]	P01864	2	2	7.16	4.18	1.077	1.09	4.5
950	Vacuolar protein sorting-associated protein 45 OS=Mus musculus GN=Vps45 PE=1 SV=1 - [VPS45_MOUSE]	P97390	9	10	12.81	15.44	1.077	0.984	3.9	3.5
951	Protein disulfide-isomerase A3 OS=Mus musculus GN=Pdia3 PE=1 SV=2 - [PDIA3_MOUSE]	P27773	27	32	51.88	59.8	1.077	1.064	1.3	0.3
952	NADH dehydrogenase [ubiquinone] 1 beta subcomplex subunit 10 OS=Mus musculus GN=Ndufb10 PE=1 SV=3 - [NDUBA_MOUSE]	Q9DCS9	7	8	43.75	52.27	1.078	1.12	3.2	2.3
953	Gephyrin OS=Mus musculus GN=Gphn PE=1 SV=2 - [GEPH_MOUSE]	Q8BUV3	7	9	9.62	12.09	1.078	1.011	0.8	4
954	PC4 and SFRS1-interacting protein OS=Mus musculus GN=Psip1 PE=1 SV=1 - [PSIP1_MOUSE]	Q99JF8	4	7	8.14	13.45	1.079	1.471	4.9	6.1
955	Dual specificity mitogen-activated protein kinase kinase 1 OS=Mus musculus GN=Map2k1 PE=1 SV=2 - [MP2K1_MOUSE]	P31938	9	12	19.08	32.32	1.079	0.95	2.8	4.8
956	Phosphatidate cytidylyltransferase 2 OS=Mus musculus GN=Cds2 PE=1 SV=1 - [CDS2_MOUSE]	Q99L43	6	7	18.24	19.59	1.079	1.02	3.8	2.3
957	LanC-like protein 2 OS=Mus musculus GN=Lancl2 PE=1 SV=1 - [LANC2_MOUSE]	Q9JJK2	7	8	20.67	23.78	1.079	0.977	2.5	4.1
958	Succinyl-CoA ligase [ADP-forming] subunit beta, mitochondrial OS=Mus musculus GN=Sucla2 PE=1 SV=2 - [SUCB1_MOUSE]	Q9Z2I9	23	26	38.23	45.14	1.08	1.159	0.8	3.3
959	Pyruvate carboxylase, mitochondrial OS=Mus musculus GN=Pc PE=1 SV=1 - [PYC_MOUSE]	Q05920	34	29	30.98	25.3	1.08	1.139	2.6	3
960	Glutamate dehydrogenase 1, mitochondrial OS=Mus musculus GN=Glud1 PE=1 SV=1 - [DHE3_MOUSE]	P26443	27	27	48.21	45.88	1.08	1.301	1	0.9
961	NADH-cytochrome b5 reductase 3 OS=Mus musculus GN=Cyb5r3 PE=1 SV=3 - [NB5R3_MOUSE]	Q9DCN2	8	7	26.25	19.93	1.08	1.035	2.7	2
962	Enoyl-CoA hydratase, mitochondrial OS=Mus musculus GN=Echs1 PE=1 SV=1 - [ECHM_MOUSE]	Q8BH95	11	10	36.55	35.52	1.08	1.136	1	2.7
963	Spectrin alpha chain, non-erythrocytic 1 OS=Mus musculus GN=Sptan1 PE=1 SV=4 - [SPTN1_MOUSE]	P16546	181	217	65.53	75.49	1.081	0.996	0.2	0.3
964	Valacyclovir hydrolase OS=Mus musculus GN=Bphl PE=1 SV=1 - [BPHL_MOUSE]	Q8R164	10	9	35.05	28.52	1.082	1.13	2	5
965	Serine/threonine-protein phosphatase 2A 56 kDa regulatory subunit gamma isoform OS=Mus musculus GN=Ppp2r5c PE=1 SV=2 - [2A5G_MOUSE]	Q60996	6	7	9.35	12.6	1.082	0.969	5.6	2.5
966	Vesicular glutamate transporter 1 OS=Mus musculus GN=Slc17a7 PE=1 SV=2 - [VGLU1_MOUSE]	Q3TXX4	12	13	20.89	20.89	1.083	0.939	2.5	1.3
967	L-lactate dehydrogenase A chain OS=Mus musculus GN=Ldha PE=1 SV=3 - [LDHA_MOUSE]	P06151	15	16	43.98	45.18	1.083	0.876	1.3	2.2
968	Estradiol 17-beta-dehydrogenase 11 OS=Mus musculus GN=Hsd17b11 PE=2 SV=1 - [DHB11_MOUSE]	Q9EQ06	4	4	11.07	13.42	1.084	1.04	1.1	0
969	NADH-ubiquinone oxidoreductase 75 kDa subunit, mitochondrial OS=Mus musculus GN=Ndufs1 PE=1 SV=2 - [NDUS1_MOUSE]	Q91VD9	38	38	48.14	50.34	1.085	1.185	1	1.9
970	Monoacylglycerol lipase ABHD12 OS=Mus musculus GN=Abhd12 PE=1 SV=2 - [ABD12_MOUSE]	Q99LR1	12	10	37.19	29.4	1.085	0.953	4.9	3.6
971	[Pyruvate dehydrogenase (acetyl-transferring)] kinase isozyme 3, mitochondrial OS=Mus musculus GN=Pdk3 PE=2 SV=1 - [PDK3_MOUSE]	Q922H2	6	5	12.53	13.73	1.086	1.149	1.7	4.5
972	Isoleucine--tRNA ligase, mitochondrial OS=Mus musculus GN=Iars2 PE=1 SV=1 - [SYIM_MOUSE]	Q8BIJ6	9	10	10.08	11.17	1.086	1.201	5.1	1.3
973	Isocitrate dehydrogenase [NAD] subunit alpha, mitochondrial OS=Mus musculus GN=Idh3a PE=1 SV=1 - [IDH3A_MOUSE]	Q9D6R2	19	17	45.08	40.98	1.086	1.187	1.5	3.1
974	Mitochondrial fission factor OS=Mus musculus GN=Mff PE=1 SV=1 - [MFF_MOUSE]	Q6PCP5	2	2	16.15	13.06	1.086	1.184	3.8	3.9
975	F-actin-capping protein subunit beta OS=Mus musculus GN=Capzb PE=1 SV=3 - [CAPZB_MOUSE]	P47757	7	8	23.83	31.77	1.086	0.991	0.5	2.2
976	NADH dehydrogenase [ubiquinone] flavoprotein 1, mitochondrial OS=Mus musculus GN=Ndufv1 PE=1 SV=1 - [NDUV1_MOUSE]	Q91YT0	20	16	40.95	36.42	1.086	1.203	0.7	0.8
977	Pyruvate dehydrogenase E1 component subunit beta, mitochondrial OS=Mus musculus GN=Pdhb PE=1 SV=1 - [ODPB_MOUSE]	Q9D051	12	11	40.39	36.21	1.087	1.207	0.7	2
978	NADH dehydrogenase [ubiquinone] iron-sulfur protein 7, mitochondrial OS=Mus musculus GN=Ndufs7 PE=1 SV=1 - [NDUS7_MOUSE]	Q9DC70	8	8	26.79	29.46	1.087	1.183	2.2	2.3
979	Uncharacterized protein C19orf52 homolog OS=Mus musculus PE=2 SV=1 - [CS052_MOUSE]	Q8BGX2	6	6	18.42	18.42	1.087	1.091	5.4	2.7
980	Histone H1.5 OS=Mus musculus GN=Hist1h1b PE=1 SV=2 - [H15_MOUSE]	P43276	24	19	54.71	52.02	1.087	1.649	2.1	3.2
981	Heterochromatin protein 1-binding protein 3 OS=Mus musculus GN=Hp1bp3 PE=1 SV=1 - [HP1B3_MOUSE]	Q3TEA8	16	12	24.19	17.87	1.087	1.236	0.9	3.9
982	AP-1 complex subunit beta-1 OS=Mus musculus GN=Ap1b1 PE=1 SV=2 - [AP1B1_MOUSE]	O35643	26	29	26.94	31.18	1.088	0.978	0.2	2.2
983	Acylglycerol kinase, mitochondrial OS=Mus musculus GN=Agk PE=1 SV=1 - [AGK_MOUSE]	Q9ESW4	4	7	9.03	15.2	1.089	1.106	3.7	3.9
984	5'-nucleotidase domain-containing protein 3 OS=Mus musculus GN=Nt5dc3 PE=2 SV=1 - [NT5D3_MOUSE]	Q3UHB1	21	21	36.45	37.91	1.089	1.067	1.9	2.1
985	Dehydrogenase/reductase SDR family member 1 OS=Mus musculus GN=Dhrs1 PE=2 SV=1 - [DHRS1_MOUSE]	Q99L04	6	3	23.96	13.42	1.09	0.949	1.2	5.3
986	ATP synthase subunit beta, mitochondrial OS=Mus musculus GN=Atp5b PE=1 SV=2 - [ATPB_MOUSE]	P56480	38	34	85.07	82.99	1.09	1.193	0.7	0.8
987	Cytochrome b-c1 complex subunit 1, mitochondrial OS=Mus musculus GN=Uqcrc1 PE=1 SV=2 - [QCR1_MOUSE]	Q9CZ13	17	14	31.67	26.46	1.09	1.232	1.5	1.7
988	Synaptogyrin-3 OS=Mus musculus GN=Syngr3 PE=1 SV=1 - [SNG3_MOUSE]	Q8R191	7	7	31.44	31.44	1.09	0.962	0.3	4.4
989	Thioredoxin-dependent peroxide reductase, mitochondrial OS=Mus musculus GN=Prdx3 PE=1 SV=1 - [PRDX3_MOUSE]	P20108	10	9	33.85	29.57	1.091	1.118	4.1	1.9
990	Prelamin-A/C OS=Mus musculus GN=Lmna PE=1 SV=2 - [LMNA_MOUSE]	P48678	10	9	13.38	13.08	1.091	1.262	5.5	9.3
991	Coronin-1C OS=Mus musculus GN=Coro1c PE=1 SV=2 - [COR1C_MOUSE]	Q9WUM4	4	5	7.17	8.65	1.092	0.976	0.9	0.8
992	Long-chain-fatty-acid--CoA ligase 1 OS=Mus musculus GN=Acsl1 PE=1 SV=2 - [ACSL1_MOUSE]	P41216	6	9	8.15	14.45	1.092	1.04	10.5	1.3
993	Histone H1.0 OS=Mus musculus GN=H1f0 PE=2 SV=4 - [H10_MOUSE]	P10922	27	16	67.01	51.55	1.092	1.616	1.5	1.5
994	Electron transfer flavoprotein-ubiquinone oxidoreductase, mitochondrial OS=Mus musculus GN=Etfdh PE=1 SV=1 - [ETFD_MOUSE]	Q921G7	12	8	17.37	13.31	1.092	1.141	0.8	2
995	Epsin-1 OS=Mus musculus GN=Epn1 PE=1 SV=3 - [EPN1_MOUSE]	Q80VP1	3	5	8	14.96	1.093	0.954	1.6	4.6
996	Calcium uptake protein 1, mitochondrial OS=Mus musculus GN=Micu1 PE=1 SV=1 - [MICU1_MOUSE]	Q8VCX5	3	3	8.81	5.87	1.093	1.147	5.2	3.2
997	Phosphate carrier protein, mitochondrial OS=Mus musculus GN=Slc25a3 PE=1 SV=1 - [MPCP_MOUSE]	Q8VEM8	19	17	40.06	41.18	1.094	1.153	2.7	1.1
998	SLIT-ROBO Rho GTPase-activating protein 3 OS=Mus musculus GN=Srgap3 PE=1 SV=1 - [SRGP3_MOUSE]	Q812A2	5	9	3.64	7.64	1.095	1.043	8.9	2.4
999	Isocitrate dehydrogenase [NAD] subunit gamma 1, mitochondrial OS=Mus musculus GN=Idh3g PE=1 SV=1 - [IDHG1_MOUSE]	P70404	19	13	42.49	32.82	1.095	1.125	2	3.4
1000	Glutaminase kidney isoform, mitochondrial OS=Mus musculus GN=Gls PE=1 SV=1 - [GLSK_MOUSE]	D3Z7P3	35	26	54.6	43.18	1.095	1.134	2	1.1
1001	Cyclin-dependent kinase 5 OS=Mus musculus GN=Cdk5 PE=1 SV=1 - [CDK5_MOUSE]	P49615	6	6	24.66	23.97	1.095	1.014	3.2	0.9
1002	Lipoamide acyltransferase component of branched-chain alpha-keto acid dehydrogenase complex, mitochondrial OS=Mus musculus GN=Dbt PE=1 SV=2 - [ODB2_MOUSE]	P53395	2	4	4.98	8.09	1.095	1.181		2.8
1003	Heme oxygenase 2 OS=Mus musculus GN=Hmox2 PE=2 SV=1 - [HMOX2_MOUSE]	O70252	4	7	15.24	23.17	1.096	1.046	1.6	3.1
1004	Rho guanine nucleotide exchange factor 2 OS=Mus musculus GN=Arhgef2 PE=1 SV=4 - [ARHG2_MOUSE]	Q60875	7	10	9.34	11.88	1.096	1.026	9.2	6.1
1005	AP-2 complex subunit beta OS=Mus musculus GN=Ap2b1 PE=1 SV=1 - [AP2B1_MOUSE]	Q9DBG3	40	44	42.58	45.14	1.096	0.926	1.9	3.3
1006	Brain-specific angiogenesis inhibitor 1-associated protein 2 OS=Mus musculus GN=Baiap2 PE=1 SV=2 - [BAIP2_MOUSE]	Q8BKX1	21	29	37.57	57.94	1.096	0.891	2.2	1.2
1007	Septin-11 OS=Mus musculus GN=Sept11 PE=1 SV=4 - [SEP11_MOUSE]	Q8C1B7	17	24	32.48	42.46	1.096	0.964	2.4	4.2
1008	Stromal membrane-associated protein 1 OS=Mus musculus GN=Smap1 PE=1 SV=1 - [SMAP1_MOUSE]	Q91VZ6	3	4	8.18	10.23	1.097	1.012	2	3.1
1009	Very-long-chain enoyl-CoA reductase OS=Mus musculus GN=Tecr PE=2 SV=1 - [TECR_MOUSE]	Q9CY27	4	9	9.42	22.4	1.097	0.818	7.8	8.3
1010	Sorbin and SH3 domain-containing protein 2 OS=Mus musculus GN=Sorbs2 PE=1 SV=2 - [SRBS2_MOUSE]	Q3UTJ2	3	4	2.8	2.88	1.099	0.967	4.9	0.8
1011	Fumarylacetoacetate hydrolase domain-containing protein 2A OS=Mus musculus GN=Fahd2 PE=1 SV=1 - [FAHD2_MOUSE]	Q3TC72	4	3	15.34	12.14	1.099	1.104	4.3	3.7
1012	Enoyl-CoA delta isomerase 1, mitochondrial OS=Mus musculus GN=Eci1 PE=1 SV=2 - [ECI1_MOUSE]	P42125	8	3	30.8	11.07	1.1	1.22	3	5.6
1013	Protein disulfide-isomerase A6 OS=Mus musculus GN=Pdia6 PE=1 SV=3 - [PDIA6_MOUSE]	Q922R8	8	9	19.77	23.18	1.1	1.044	6.2	3.5
1014	Septin-5 OS=Mus musculus GN=Sept5 PE=1 SV=2 - [SEPT5_MOUSE]	Q9Z2Q6	21	23	43.63	47.43	1.1	0.912	0.5	0.9
1015	NADH dehydrogenase [ubiquinone] 1 alpha subcomplex subunit 9, mitochondrial OS=Mus musculus GN=Ndufa9 PE=1 SV=2 - [NDUA9_MOUSE]	Q9DC69	24	22	61.8	50.13	1.101	1.17	0.9	4.5
1016	Succinate dehydrogenase [ubiquinone] flavoprotein subunit, mitochondrial OS=Mus musculus GN=Sdha PE=1 SV=1 - [DHSA_MOUSE]	Q8K2B3	26	24	34.64	31.48	1.101	1.203	0.7	2.2
1017	Phosphoenolpyruvate carboxykinase [GTP], mitochondrial OS=Mus musculus GN=Pck2 PE=2 SV=1 - [PCKGM_MOUSE]	Q8BH04	10	7	18.59	11.72	1.101	1.177	6.5	7.5
1018	D-beta-hydroxybutyrate dehydrogenase, mitochondrial OS=Mus musculus GN=Bdh1 PE=1 SV=2 - [BDH_MOUSE]	Q80XN0	13	9	34.69	25.66	1.102	1.141	1.7	3.3
1019	Adenylate kinase isoenzyme 5 OS=Mus musculus GN=Ak5 PE=2 SV=2 - [KAD5_MOUSE]	Q920P5	3	7	6.05	12.63	1.102	1.137		3.4
1020	Nuclease EXOG, mitochondrial OS=Mus musculus GN=Exog PE=2 SV=1 - [EXOG_MOUSE]	Q8C163	5	6	13.86	20.92	1.103	1.074	8.6	3.3
1021	Apolipoprotein O OS=Mus musculus GN=Apoo PE=2 SV=1 - [APOO_MOUSE]	Q9DCZ4	5	6	23.11	25.94	1.103	1.081	0.8	3.3
1022	Protein NipSnap homolog 3B OS=Mus musculus GN=Nipsnap3b PE=2 SV=1 - [NPS3B_MOUSE]	Q9CQE1	4	4	12.96	15.38	1.104	1.132	1.7	2.6
1023	V-type proton ATPase 16 kDa proteolipid subunit OS=Mus musculus GN=Atp6v0c PE=2 SV=1 - [VATL_MOUSE]	P63082	2	3	31.61	53.55	1.104	0.683	4.5	3.1
1024	Long-chain specific acyl-CoA dehydrogenase, mitochondrial OS=Mus musculus GN=Acadl PE=1 SV=2 - [ACADL_MOUSE]	P51174	14	9	23.49	17.67	1.106	1.231	2.6	8.9
1025	ADP/ATP translocase 2 OS=Mus musculus GN=Slc25a5 PE=1 SV=3 - [ADT2_MOUSE]	P51881	21	19	54.03	48.32	1.107	1.139	2.3	1.5
1026	Succinate dehydrogenase [ubiquinone] iron-sulfur subunit, mitochondrial OS=Mus musculus GN=Sdhb PE=1 SV=1 - [DHSB_MOUSE]	Q9CQA3	16	17	47.87	43.62	1.109	1.162	1.3	0.6
1027	Mitochondrial glutamate carrier 1 OS=Mus musculus GN=Slc25a22 PE=1 SV=1 - [GHC1_MOUSE]	Q9D6M3	16	17	56.97	56.97	1.109	1.131	2	4.7
1028	Mitochondrial 2-oxoglutarate/malate carrier protein OS=Mus musculus GN=Slc25a11 PE=1 SV=3 - [M2OM_MOUSE]	Q9CR62	20	18	68.15	60.83	1.109	1.118	0.5	1.6
1029	Vacuolar protein sorting-associated protein 35 OS=Mus musculus GN=Vps35 PE=1 SV=1 - [VPS35_MOUSE]	Q9EQH3	6	11	8.92	14.07	1.11	0.932	2.6	2.2
1030	NAD kinase 2, mitochondrial OS=Mus musculus GN=Nadk2 PE=1 SV=2 - [NAKD2_MOUSE]	Q8C5H8	3	4	8.19	9.51	1.111	1.04	3.6	8.3
1031	Succinyl-CoA:3-ketoacid coenzyme A transferase 1, mitochondrial OS=Mus musculus GN=Oxct1 PE=1 SV=1 - [SCOT1_MOUSE]	Q9D0K2	15	14	39.04	39.62	1.111	1.23	1.2	0.5
1032	Leucine-rich PPR motif-containing protein, mitochondrial OS=Mus musculus GN=Lrpprc PE=1 SV=2 - [LPPRC_MOUSE]	Q6PB66	28	21	16.81	13.79	1.112	1.158	1.8	3.6
1033	Alpha-aminoadipic semialdehyde dehydrogenase OS=Mus musculus GN=Aldh7a1 PE=1 SV=4 - [AL7A1_MOUSE]	Q9DBF1	10	9	20.41	16.7	1.112	1.149	1.7	5
1034	Redox-regulatory protein FAM213A OS=Mus musculus GN=Fam213a PE=1 SV=2 - [F213A_MOUSE]	Q9CYH2	8	8	35.32	34.86	1.112	1.163	1.4	2.2
1035	Creatine kinase U-type, mitochondrial OS=Mus musculus GN=Ckmt1 PE=1 SV=1 - [KCRU_MOUSE]	P30275	21	23	48.8	52.87	1.113	1.118	2.2	1.5
1036	Hemoglobin subunit alpha OS=Mus musculus GN=Hba PE=1 SV=2 - [HBA_MOUSE]	P01942	5	5	26.76	21.13	1.114	0.907	5	5.7
1037	ATP synthase subunit alpha, mitochondrial OS=Mus musculus GN=Atp5a1 PE=1 SV=1 - [ATPA_MOUSE]	Q03265	52	46	72.33	69.8	1.114	1.245	0.1	0.9
1038	Propionyl-CoA carboxylase alpha chain, mitochondrial OS=Mus musculus GN=Pcca PE=1 SV=2 - [PCCA_MOUSE]	Q91ZA3	22	14	33.01	20.03	1.115	1.155	5.4	1.2
1039	Succinate-semialdehyde dehydrogenase, mitochondrial OS=Mus musculus GN=Aldh5a1 PE=1 SV=1 - [SSDH_MOUSE]	Q8BWF0	21	16	39.2	28.49	1.116	1.2	2.3	2.6
1040	Acetyl-CoA acetyltransferase, mitochondrial OS=Mus musculus GN=Acat1 PE=1 SV=1 - [THIL_MOUSE]	Q8QZT1	20	20	42.22	45.28	1.116	1.224	2.2	0.7
1041	2,4-dienoyl-CoA reductase, mitochondrial OS=Mus musculus GN=Decr1 PE=1 SV=1 - [DECR_MOUSE]	Q9CQ62	8	4	26.57	11.34	1.117	1.26	2.2	0.1
1042	60 kDa heat shock protein, mitochondrial OS=Mus musculus GN=Hspd1 PE=1 SV=1 - [CH60_MOUSE]	P63038	43	35	70.86	66.84	1.117	1.18	0.5	1.2
1043	Putative tyrosine-protein phosphatase auxilin OS=Mus musculus GN=Dnajc6 PE=2 SV=2 - [AUXI_MOUSE]	Q80TZ3	7	12	7.57	12.37	1.117	0.987	4.2	1.4
1044	Alpha-centractin OS=Mus musculus GN=Actr1a PE=2 SV=1 - [ACTZ_MOUSE]	P61164	8	11	23.14	43.62	1.117	0.99	4.4	6.7
1045	Ig gamma-1 chain C region secreted form OS=Mus musculus GN=Ighg1 PE=1 SV=1 - [IGHG1_MOUSE]	P01868	5	8	16.67	25.93	1.117	0.828	1.9	3.8
1046	Fumarate hydratase, mitochondrial OS=Mus musculus GN=Fh PE=1 SV=3 - [FUMH_MOUSE]	P97807	28	27	57.4	59.17	1.119	1.186	1.3	1.5
1047	Dihydrolipoyllysine-residue acetyltransferase component of pyruvate dehydrogenase complex, mitochondrial OS=Mus musculus GN=Dlat PE=1 SV=2 - [ODP2_MOUSE]	Q8BMF4	20	18	33.33	31.62	1.121	1.145	2.1	1.6
1048	Pyruvate dehydrogenase E1 component subunit alpha, somatic form, mitochondrial OS=Mus musculus GN=Pdha1 PE=1 SV=1 - [ODPA_MOUSE]	P35486	24	25	45.64	52.05	1.122	1.202	1.5	1.1
1049	MOSC domain-containing protein 2, mitochondrial OS=Mus musculus GN=Marc2 PE=1 SV=1 - [MOSC2_MOUSE]	Q922Q1	8	7	15.98	14.79	1.122	1.102	3.8	8.6
1050	Aldehyde dehydrogenase, mitochondrial OS=Mus musculus GN=Aldh2 PE=1 SV=1 - [ALDH2_MOUSE]	P47738	21	15	39.5	26.01	1.123	1.265	2.6	1.8
1051	Metaxin-1 OS=Mus musculus GN=Mtx1 PE=1 SV=1 - [MTX1_MOUSE]	P47802	2	6	7.89	23.34	1.123	1.149	8.9	0.7
1052	Solute carrier family 25 member 51 OS=Mus musculus GN=Slc25a51 PE=2 SV=1 - [S2551_MOUSE]	Q5HZI9	4	2	10.74	8.72	1.123	1.114	18.3	5.7
1053	ADP/ATP translocase 1 OS=Mus musculus GN=Slc25a4 PE=1 SV=4 - [ADT1_MOUSE]	P48962	22	22	61.07	61.74	1.124	1.14	1.3	2.5
1054	Cytochrome c, somatic OS=Mus musculus GN=Cycs PE=1 SV=2 - [CYC_MOUSE]	P62897	14	15	69.52	71.43	1.124	1.192	2.7	0.6
1055	Glycogen phosphorylase, muscle form OS=Mus musculus GN=Pygm PE=1 SV=3 - [PYGM_MOUSE]	Q9WUB3	18	19	21.38	23.87	1.124	1.082	10.4	2.5
1056	Coronin-2B OS=Mus musculus GN=Coro2b PE=2 SV=2 - [COR2B_MOUSE]	Q8BH44	7	9	8.75	13.54	1.125	0.992	3.9	3.9
1057	40S ribosomal protein S7 OS=Mus musculus GN=Rps7 PE=2 SV=1 - [RS7_MOUSE]	P62082	6	5	24.74	21.65	1.126	1.084	5.7	1.4
1058	40S ribosomal protein S25 OS=Mus musculus GN=Rps25 PE=2 SV=1 - [RS25_MOUSE]	P62852	3	3	20.8	22.4	1.128	0.993	3.7	1.1
1059	Ras-related protein Rab-5B OS=Mus musculus GN=Rab5b PE=1 SV=1 - [RAB5B_MOUSE]	P61021	10	9	48.84	50.23	1.128	1.032	10.7	2
1060	Lon protease homolog, mitochondrial OS=Mus musculus GN=Lonp1 PE=1 SV=2 - [LONM_MOUSE]	Q8CGK3	16	18	14.65	19.6	1.131	1.191	5.5	2.8
1061	Citrate synthase, mitochondrial OS=Mus musculus GN=Cs PE=1 SV=1 - [CISY_MOUSE]	Q9CZU6	23	23	52.8	48.92	1.131	1.175	1.2	2.1
1062	Calcium-binding mitochondrial carrier protein SCaMC-3 OS=Mus musculus GN=Slc25a23 PE=2 SV=1 - [SCMC3_MOUSE]	Q6GQS1	7	5	14.56	8.78	1.133	1.097	2.8	6.1
1063	High mobility group protein HMG-I/HMG-Y OS=Mus musculus GN=Hmga1 PE=1 SV=4 - [HMGA1_MOUSE]	P17095	4	3	23.36	29.91	1.134	1.909	6.8	18.3
1064	NADH dehydrogenase [ubiquinone] 1 alpha subcomplex subunit 12 OS=Mus musculus GN=Ndufa12 PE=2 SV=2 - [NDUAC_MOUSE]	Q7TMF3	5	8	41.38	62.76	1.134	1.11	4.1	1.4
1065	Trifunctional enzyme subunit beta, mitochondrial OS=Mus musculus GN=Hadhb PE=1 SV=1 - [ECHB_MOUSE]	Q99JY0	14	14	32.84	28.63	1.135	1.175	1.7	1.4
1066	Short/branched chain specific acyl-CoA dehydrogenase, mitochondrial OS=Mus musculus GN=Acadsb PE=1 SV=1 - [ACDSB_MOUSE]	Q9DBL1	2	3	6.48	6.71	1.137	1.067
1067	Aconitate hydratase, mitochondrial OS=Mus musculus GN=Aco2 PE=1 SV=1 - [ACON_MOUSE]	Q99KI0	45	44	52.95	54.62	1.138	1.231	0.5	0.7
1068	Histone H2A.Z OS=Mus musculus GN=H2afz PE=1 SV=2 - [H2AZ_MOUSE]	P0C0S6	8	5	65.63	35.16	1.138	1.461	5	2.8
1069	Vimentin OS=Mus musculus GN=Vim PE=1 SV=3 - [VIME_MOUSE]	P20152	14	16	28.11	33.48	1.139	0.935	2.6	1.4
1070	NADH dehydrogenase [ubiquinone] 1 alpha subcomplex subunit 10, mitochondrial OS=Mus musculus GN=Ndufa10 PE=1 SV=1 - [NDUAA_MOUSE]	Q99LC3	18	16	46.48	41.13	1.141	1.192	2.5	1
1071	Microsomal glutathione S-transferase 3 OS=Mus musculus GN=Mgst3 PE=1 SV=1 - [MGST3_MOUSE]	Q9CPU4	5	3	37.91	33.99	1.143	0.893	1.8	3.6
1072	Synaptojanin-2-binding protein OS=Mus musculus GN=Synj2bp PE=1 SV=1 - [SYJ2B_MOUSE]	Q9D6K5	3	3	27.59	26.21	1.143	1.044	2.4	4.8
1073	Histone H4 OS=Mus musculus GN=Hist1h4a PE=1 SV=2 - [H4_MOUSE]	P62806	14	10	72.82	64.08	1.144	1.605	2.1	3.7
1074	Carbonyl reductase family member 4 OS=Mus musculus GN=Cbr4 PE=1 SV=2 - [CBR4_MOUSE]	Q91VT4	2	2	11.02	11.02	1.144	1.17	10.9	12.3
1075	Electron transfer flavoprotein subunit alpha, mitochondrial OS=Mus musculus GN=Etfa PE=1 SV=2 - [ETFA_MOUSE]	Q99LC5	15	14	57.66	53.75	1.144	1.242	2.1	2
1076	Calcium/calmodulin-dependent protein kinase type II subunit delta OS=Mus musculus GN=Camk2d PE=1 SV=1 - [KCC2D_MOUSE]	Q6PHZ2	24	28	42.48	49.9	1.144	0.941	7.1	1.3
1077	Calreticulin OS=Mus musculus GN=Calr PE=1 SV=1 - [CALR_MOUSE]	P14211	18	20	50.48	53.85	1.145	1.028	0.9	2
1078	Delta-1-pyrroline-5-carboxylate dehydrogenase, mitochondrial OS=Mus musculus GN=Aldh4a1 PE=1 SV=3 - [AL4A1_MOUSE]	Q8CHT0	5	2	7.12	4.45	1.146	1.096	3.1	7.7
1079	ES1 protein homolog, mitochondrial OS=Mus musculus GN=D10Jhu81e PE=1 SV=1 - [ES1_MOUSE]	Q9D172	10	10	42.11	43.98	1.147	1.214	3.3	1.1
1080	Ornithine aminotransferase, mitochondrial OS=Mus musculus GN=Oat PE=1 SV=1 - [OAT_MOUSE]	P29758	9	7	25.06	14.35	1.147	1.004	2.8	13.7
1081	Alpha-actinin-1 OS=Mus musculus GN=Actn1 PE=1 SV=1 - [ACTN1_MOUSE]	Q7TPR4	15	18	17.6	19.39	1.147	0.952	3.7	3.9
1082	Malate dehydrogenase, mitochondrial OS=Mus musculus GN=Mdh2 PE=1 SV=3 - [MDHM_MOUSE]	P08249	24	19	61.54	60.65	1.148	1.195	0.9	1.5
1083	Tumor protein D54 OS=Mus musculus GN=Tpd52l2 PE=1 SV=1 - [TPD54_MOUSE]	Q9CYZ2	3	6	10.45	19.55	1.156	0.93		6.4
1084	Vesicular inhibitory amino acid transporter OS=Mus musculus GN=Slc32a1 PE=1 SV=3 - [VIAAT_MOUSE]	O35633	6	8	11.62	12.95	1.157	0.879	1.4	7.8
1085	Superoxide dismutase [Mn], mitochondrial OS=Mus musculus GN=Sod2 PE=1 SV=3 - [SODM_MOUSE]	P09671	10	10	44.59	41.89	1.161	1.232	3.1	1.3
1086	Myosin-9 OS=Mus musculus GN=Myh9 PE=1 SV=4 - [MYH9_MOUSE]	Q8VDD5	22	25	10.66	11.33	1.162	1.086	2.6	9.4
1087	Synaptopodin OS=Mus musculus GN=Synpo PE=1 SV=2 - [SYNPO_MOUSE]	Q8CC35	8	8	11.63	10.33	1.164	0.91	1.1	3.7
1088	4-aminobutyrate aminotransferase, mitochondrial OS=Mus musculus GN=Abat PE=1 SV=1 - [GABT_MOUSE]	P61922	22	22	54.8	48	1.169	1.205	2.6	1.3
1089	Actin, alpha cardiac muscle 1 OS=Mus musculus GN=Actc1 PE=1 SV=1 - [ACTC_MOUSE]	P68033	28	21	61.27	48.81	1.169	1.036	12	1.6
1090	Aspartate aminotransferase, mitochondrial OS=Mus musculus GN=Got2 PE=1 SV=1 - [AATM_MOUSE]	P05202	27	31	52.56	53.02	1.171	1.203	0.5	1.8
1091	Inorganic pyrophosphatase 2, mitochondrial OS=Mus musculus GN=Ppa2 PE=1 SV=1 - [IPYR2_MOUSE]	Q91VM9	4	3	14.85	13.33	1.172	1.137	7.6	4
1092	Casein kinase I isoform delta OS=Mus musculus GN=Csnk1d PE=1 SV=2 - [KC1D_MOUSE]	Q9DC28	4	4	9.64	9.88	1.183	0.892	8.4	2.3
1093	Hexokinase-1 OS=Mus musculus GN=Hk1 PE=1 SV=3 - [HXK1_MOUSE]	P17710	52	54	43.22	42.92	1.185	1.155	0.9	1.2
1094	Mitochondrial Rho GTPase 1 OS=Mus musculus GN=Rhot1 PE=2 SV=1 - [MIRO1_MOUSE]	Q8BG51	3	4	3.96	7.13	1.186	1.094	6.2	2.6
1095	Isocitrate dehydrogenase [NADP], mitochondrial OS=Mus musculus GN=Idh2 PE=1 SV=3 - [IDHP_MOUSE]	P54071	13	18	25.44	35.84	1.186	1.351	1	8.9
1096	Hydroxyacyl-coenzyme A dehydrogenase, mitochondrial OS=Mus musculus GN=Hadh PE=1 SV=2 - [HCDH_MOUSE]	Q61425	6	4	16.88	10.19	1.196	1.323	4.2	1.2
1097	Sodium-dependent neutral amino acid transporter SLC6A17 OS=Mus musculus GN=Slc6a17 PE=1 SV=1 - [S6A17_MOUSE]	Q8BJI1	6	9	9.49	13.76	1.204	0.917	5.3	5.9
1098	60S ribosomal protein L23a OS=Mus musculus GN=Rpl23a PE=1 SV=1 - [RL23A_MOUSE]	P62751	6	9	30.77	44.23	1.211	1.139	12.6	2.9
1099	Histone H1.4 OS=Mus musculus GN=Hist1h1e PE=1 SV=2 - [H14_MOUSE]	P43274	32	23	66.67	57.53	1.221	1.743	1.4	3.1
1100	Solute carrier family 2, facilitated glucose transporter member 1 OS=Mus musculus GN=Slc2a1 PE=1 SV=4 - [GTR1_MOUSE]	P17809	6	5	11.99	6.5	1.222	1.01	1.8	1.3
1101	Monoacylglycerol lipase ABHD6 OS=Mus musculus GN=Abhd6 PE=2 SV=1 - [ABHD6_MOUSE]	Q8R2Y0	4	5	13.1	18.45	1.226	1.1	16.2	0.8
1102	Histone H1.2 OS=Mus musculus GN=Hist1h1c PE=1 SV=2 - [H12_MOUSE]	P15864	30	24	66.51	60.38	1.23	1.656	2.4	0.7
1103	Protein sel-1 homolog 1 OS=Mus musculus GN=Sel1l PE=2 SV=2 - [SE1L1_MOUSE]	Q9Z2G6	3	2	3.04	2.15	1.238	1.026	22.9	4.2
1104	DNA damage-binding protein 1 OS=Mus musculus GN=Ddb1 PE=1 SV=2 - [DDB1_MOUSE]	Q3U1J4	2	3	1.4	2.28	1.243	1.005	24.1	2.4
1105	Synaptophysin OS=Mus musculus GN=Syp PE=1 SV=2 - [SYPH_MOUSE]	Q62277	13	11	53.82	50	1.247	0.923	2.5	2.5
1106	Phosphatidylinositol transfer protein alpha isoform OS=Mus musculus GN=Pitpna PE=1 SV=2 - [PIPNA_MOUSE]	P53810	2	6	7.38	23.62	1.271	1.173	0.9	16.6
1107	Epsin-2 OS=Mus musculus GN=Epn2 PE=1 SV=1 - [EPN2_MOUSE]	Q8CHU3	4	3	7.39	7.23	1.329	0.89	11.1	3

## Sheet: Overlap (NexCre)
No.	Name	UniProt. Acc.	Σ# Peptides APP-KO/wt	Σ# Peptides NexCre/wt	Σ Coverage APP-KO/wt	Σ Coverage NexCre/wt	APP-KO/wt	NexCre/wt	Variability [%] APP-KO/wt	Variability [%] NexCre/wt
1	Keratin, type II cytoskeletal 5 OS=Mus musculus GN=Krt5 PE=1 SV=1 - [K2C5_MOUSE]	Q922U2	4	10	5.69	12.24	0.874	0.421	4.5	13.9			Color-Code
2	Keratin, type II cytoskeletal 2 epidermal OS=Mus musculus GN=Krt2 PE=1 SV=1 - [K22E_MOUSE]	Q3TTY5	4	6	5.52	5.94	0.947	0.432	4.3	5.3			APP-KO	APP-KO
3	Keratin, type II cytoskeletal 1 OS=Mus musculus GN=Krt1 PE=1 SV=4 - [K2C1_MOUSE]	P04104	4	7	4.87	7.38	1.011	0.441	6.1	3.9			NexCre	NexCre
4	Alpha-synuclein OS=Mus musculus GN=Snca PE=1 SV=2 - [SYUA_MOUSE]	O55042	14	12	62.14	62.14	0.836	0.528	4.2	3.7
5	Guanine nucleotide-binding protein G(I)/G(S)/G(O) subunit gamma-2 OS=Mus musculus GN=Gng2 PE=2 SV=2 - [GBG2_MOUSE]	P63213	2	5	32.39	49.3	0.37	0.536	5.8	11
6	Calmodulin OS=Mus musculus GN=Calm1 PE=1 SV=2 - [CALM_MOUSE]	P62204	6	6	75.17	60.4	0.309	0.542	17.8	14.3
7	Myristoylated alanine-rich C-kinase substrate OS=Mus musculus GN=Marcks PE=1 SV=2 - [MARCS_MOUSE]	P26645	3	9	13.27	34.63	0.894	0.613	11.9	8
8	Guanine nucleotide-binding protein G(I)/G(S)/G(O) subunit gamma-3 OS=Mus musculus GN=Gng3 PE=1 SV=1 - [GBG3_MOUSE]	P63216	2	5	32	38.67	0.634	0.614	6.5	2.7
9	Myelin basic protein OS=Mus musculus GN=Mbp PE=1 SV=2 - [MBP_MOUSE]	P04370	17	20	38.4	51.6	0.966	0.626	0.2	0.7
10	Breast carcinoma-amplified sequence 1 homolog OS=Mus musculus GN=Bcas1 PE=2 SV=3 - [BCAS1_MOUSE]	Q80YN3	15	21	19.75	23.22	0.806	0.632	2.5	1.1
11	Tubulin polymerization-promoting protein family member 3 OS=Mus musculus GN=Tppp3 PE=1 SV=1 - [TPPP3_MOUSE]	Q9CRB6	6	11	35.8	52.84	0.848	0.633	5.9	7.9
12	Beta-synuclein OS=Mus musculus GN=Sncb PE=1 SV=1 - [SYUB_MOUSE]	Q91ZZ3	10	9	58.65	58.65	0.843	0.636	6.1	3.4
13	Myelin proteolipid protein OS=Mus musculus GN=Plp1 PE=1 SV=2 - [MYPR_MOUSE]	P60202	5	6	14.8	20.22	0.859	0.636	1.2	3
14	Brain acid soluble protein 1 OS=Mus musculus GN=Basp1 PE=1 SV=3 - [BASP1_MOUSE]	Q91XV3	18	28	86.28	94.25	0.801	0.636	4.3	1.1
15	Glycolipid transfer protein OS=Mus musculus GN=Gltp PE=2 SV=3 - [GLTP_MOUSE]	Q9JL62	3	5	13.4	20.1	0.804	0.644	11.4	2.2
16	Claudin-11 OS=Mus musculus GN=Cldn11 PE=1 SV=1 - [CLD11_MOUSE]	Q60771	4	4	14.98	14.98	0.971	0.68	2.1	4.4
17	V-type proton ATPase 16 kDa proteolipid subunit OS=Mus musculus GN=Atp6v0c PE=2 SV=1 - [VATL_MOUSE]	P63082	2	3	31.61	53.55	1.104	0.683	4.5	3.1
18	Ermin OS=Mus musculus GN=Ermn PE=1 SV=1 - [ERMIN_MOUSE]	Q5EBJ4	6	14	14.59	60.85	0.934	0.689	3.8	6.1
19	Neuromodulin OS=Mus musculus GN=Gap43 PE=1 SV=1 - [NEUM_MOUSE]	P06837	11	20	65.2	84.14	0.79	0.72	1	2.6
20	Kinesin-like protein KIF21A OS=Mus musculus GN=Kif21a PE=1 SV=2 - [KI21A_MOUSE]	Q9QXL2	5	6	1.91	2.33	0.953	0.72	4.1	17.3
21	WAS/WASL-interacting protein family member 3 OS=Mus musculus GN=Wipf3 PE=1 SV=1 - [WIPF3_MOUSE]	P0C7L0	15	7	31.34	13.4	0.934	0.735	4.3	2.3
22	Eukaryotic translation initiation factor 4B OS=Mus musculus GN=Eif4b PE=1 SV=1 - [IF4B_MOUSE]	Q8BGD9	7	4	15.06	8.18	0.881	0.736	5	3
23	MARCKS-related protein OS=Mus musculus GN=Marcksl1 PE=1 SV=2 - [MRP_MOUSE]	P28667	2	6	19	27	0.939	0.743	7.4	7.1
24	Neurofilament light polypeptide OS=Mus musculus GN=Nefl PE=1 SV=5 - [NFL_MOUSE]	P08551	27	32	42.17	52.12	0.994	0.743	0.5	2.1
25	SH3 domain-binding glutamic acid-rich-like protein 3 OS=Mus musculus GN=Sh3bgrl3 PE=1 SV=1 - [SH3L3_MOUSE]	Q91VW3	5	5	56.99	53.76	0.701	0.751	6.6	7.8
26	Dynein light chain 2, cytoplasmic OS=Mus musculus GN=Dynll2 PE=1 SV=1 - [DYL2_MOUSE]	Q9D0M5	4	5	19.1	20.22	0.753	0.756	3.9	12.4
27	Alpha-endosulfine OS=Mus musculus GN=Ensa PE=1 SV=1 - [ENSA_MOUSE]	P60840	5	7	52.07	52.07	0.849	0.758	3.9	2.7
28	Small VCP/p97-interacting protein OS=Mus musculus GN=Svip PE=2 SV=1 - [SVIP_MOUSE]	Q3UZP4	3	4	38.96	48.05	0.824	0.761	7.8	10.5
29	Stathmin OS=Mus musculus GN=Stmn1 PE=1 SV=2 - [STMN1_MOUSE]	P54227	9	20	53.02	79.87	0.853	0.769	5.1	3.4
30	Fatty acid-binding protein, heart OS=Mus musculus GN=Fabp3 PE=1 SV=5 - [FABPH_MOUSE]	P11404	6	9	30.83	54.14	0.859	0.77	3.2	1.4
31	Protein CDV3 OS=Mus musculus GN=Cdv3 PE=1 SV=2 - [CDV3_MOUSE]	Q4VAA2	6	5	28.83	27.05	0.975	0.773	4.1	2.8
32	Neurogranin OS=Mus musculus GN=Nrgn PE=1 SV=1 - [NEUG_MOUSE]	P60761	3	3	26.92	26.92	0.735	0.774	3.4	1.7
33	Cysteine-rich protein 2 OS=Mus musculus GN=Crip2 PE=1 SV=1 - [CRIP2_MOUSE]	Q9DCT8	3	6	31.73	38.46	1.006	0.785	2.1	1.8
34	Hippocalcin-like protein 4 OS=Mus musculus GN=Hpcal4 PE=2 SV=3 - [HPCL4_MOUSE]	Q8BGZ1	8	8	38.22	41.36	0.818	0.788	1.8	0.7
35	Tubulin polymerization-promoting protein OS=Mus musculus GN=Tppp PE=1 SV=1 - [TPPP_MOUSE]	Q7TQD2	24	18	77.52	71.1	0.859	0.789	5	2
36	Purkinje cell protein 4 OS=Mus musculus GN=Pcp4 PE=2 SV=2 - [PCP4_MOUSE]	P63054	2	7	43.55	75.81	0.92	0.79	9.5	8.2
37	Ubiquitin carboxyl-terminal hydrolase isozyme L1 OS=Mus musculus GN=Uchl1 PE=1 SV=1 - [UCHL1_MOUSE]	Q9R0P9	9	11	35.87	50.22	0.991	0.795	1	7.8
38	14-3-3 protein zeta/delta OS=Mus musculus GN=Ywhaz PE=1 SV=1 - [1433Z_MOUSE]	P63101	26	25	72.65	73.47	0.813	0.804	2.5	1.7
39	Myelin-oligodendrocyte glycoprotein OS=Mus musculus GN=Mog PE=1 SV=1 - [MOG_MOUSE]	Q61885	14	15	38.21	38.62	0.893	0.805	0.5	2
40	Neurofilament medium polypeptide OS=Mus musculus GN=Nefm PE=1 SV=4 - [NFM_MOUSE]	P08553	24	38	22.76	37.74	0.962	0.805	3	2.4
41	Superoxide dismutase [Cu-Zn] OS=Mus musculus GN=Sod1 PE=1 SV=2 - [SODC_MOUSE]	P08228	10	10	57.14	52.6	0.795	0.807	3.8	4.5
42	S-phase kinase-associated protein 1 OS=Mus musculus GN=Skp1 PE=1 SV=3 - [SKP1_MOUSE]	Q9WTX5	3	6	16.56	26.99	0.805	0.81	6.5	2.2
43	Clathrin light chain B OS=Mus musculus GN=Cltb PE=2 SV=1 - [CLCB_MOUSE]	Q6IRU5	10	11	38.43	38.43	0.804	0.81	2.3	1.4
44	V-type proton ATPase subunit d 1 OS=Mus musculus GN=Atp6v0d1 PE=1 SV=2 - [VA0D1_MOUSE]	P51863	14	14	30.48	33.62	0.629	0.813	6.4	2.5
45	Very-long-chain enoyl-CoA reductase OS=Mus musculus GN=Tecr PE=2 SV=1 - [TECR_MOUSE]	Q9CY27	4	9	9.42	22.4	1.097	0.818	7.8	8.3
46	Glial fibrillary acidic protein OS=Mus musculus GN=Gfap PE=1 SV=4 - [GFAP_MOUSE]	P03995	22	29	49.3	59.3	1.065	0.818	1.6	1.8
47	Tetraspanin-2 OS=Mus musculus GN=Tspan2 PE=1 SV=1 - [TSN2_MOUSE]	Q922J6	2	5	10.41	15.84	1.011	0.822	3.9	3.7
48	Microtubule-associated protein tau OS=Mus musculus GN=Mapt PE=1 SV=3 - [TAU_MOUSE]	P10637	33	30	28.92	30.01	0.832	0.823	1	3.9
49	Ran-specific GTPase-activating protein OS=Mus musculus GN=Ranbp1 PE=1 SV=2 - [RANG_MOUSE]	P34022	2	7	10.84	24.63	0.906	0.824	7.2	1.8
50	Phosphatidylethanolamine-binding protein 1 OS=Mus musculus GN=Pebp1 PE=1 SV=3 - [PEBP1_MOUSE]	P70296	5	8	44.92	52.41	0.8	0.825	3.4	1
51	Stress-induced-phosphoprotein 1 OS=Mus musculus GN=Stip1 PE=1 SV=1 - [STIP1_MOUSE]	Q60864	7	23	14.92	36.1	0.918	0.826	5.4	1.4
52	Hsc70-interacting protein OS=Mus musculus GN=St13 PE=2 SV=1 - [F10A1_MOUSE]	Q99L47	8	12	15.63	27.76	0.895	0.827	2.7	4.2
53	Ig gamma-1 chain C region secreted form OS=Mus musculus GN=Ighg1 PE=1 SV=1 - [IGHG1_MOUSE]	P01868	5	8	16.67	25.93	1.117	0.828	1.9	3.8
54	14-3-3 protein theta OS=Mus musculus GN=Ywhaq PE=1 SV=1 - [1433T_MOUSE]	P68254	14	17	46.12	51.84	0.886	0.831	11.3	1.7
55	NEDD8 OS=Mus musculus GN=Nedd8 PE=1 SV=2 - [NEDD8_MOUSE]	P29595	4	7	45.68	79.01	0.755	0.833	10.3	5.2
56	Na(+)/H(+) exchange regulatory cofactor NHE-RF1 OS=Mus musculus GN=Slc9a3r1 PE=1 SV=3 - [NHRF1_MOUSE]	P70441	14	19	45.63	58.03	0.909	0.834	1.7	0.9
57	Neuronal membrane glycoprotein M6-a OS=Mus musculus GN=Gpm6a PE=1 SV=1 - [GPM6A_MOUSE]	P35802	8	9	16.55	22.3	0.901	0.834	0.8	8.5
58	Cofilin-1 OS=Mus musculus GN=Cfl1 PE=1 SV=3 - [COF1_MOUSE]	P18760	9	10	56.02	56.02	0.831	0.835	4.7	2.2
59	Hyaluronan and proteoglycan link protein 1 OS=Mus musculus GN=Hapln1 PE=2 SV=1 - [HPLN1_MOUSE]	Q9QUP5	8	7	18.82	16.01	1.016	0.837	4.1	1.7
60	Glia maturation factor beta OS=Mus musculus GN=Gmfb PE=1 SV=3 - [GMFB_MOUSE]	Q9CQI3	3	3	16.9	30.28	0.83	0.838	10.9	2.3
61	2',3'-cyclic-nucleotide 3'-phosphodiesterase OS=Mus musculus GN=Cnp PE=1 SV=3 - [CN37_MOUSE]	P16330	45	42	68.57	68.57	0.837	0.839	1.7	2
62	Growth factor receptor-bound protein 2 OS=Mus musculus GN=Grb2 PE=1 SV=1 - [GRB2_MOUSE]	Q60631	2	8	10.6	34.1	0.898	0.84		6
63	14-3-3 protein gamma OS=Mus musculus GN=Ywhag PE=1 SV=2 - [1433G_MOUSE]	P61982	21	20	64.78	64.78	0.867	0.845	3.2	3.2
64	Alpha-internexin OS=Mus musculus GN=Ina PE=1 SV=3 - [AINX_MOUSE]	P46660	34	35	57.29	61.08	0.985	0.845	2.5	0.4
65	COP9 signalosome complex subunit 8 OS=Mus musculus GN=Cops8 PE=1 SV=1 - [CSN8_MOUSE]	Q8VBV7	3	2	20.1	12.92	0.932	0.846	3.5	6.3
66	Aquaporin-4 OS=Mus musculus GN=Aqp4 PE=2 SV=2 - [AQP4_MOUSE]	P55088	10	9	23.53	23.22	1.016	0.847	2.9	0.9
67	Peptidyl-prolyl cis-trans isomerase A OS=Mus musculus GN=Ppia PE=1 SV=2 - [PPIA_MOUSE]	P17742	16	13	57.93	54.27	0.876	0.849	0.7	0.9
68	Visinin-like protein 1 OS=Mus musculus GN=Vsnl1 PE=1 SV=2 - [VISL1_MOUSE]	P62761	10	14	48.69	69.63	0.842	0.85	2.2	1.3
69	Neurocalcin-delta OS=Mus musculus GN=Ncald PE=1 SV=4 - [NCALD_MOUSE]	Q91X97	9	9	35.23	46.63	1.046	0.851	9.7	4.2
70	Vesicle-associated membrane protein 2 OS=Mus musculus GN=Vamp2 PE=1 SV=2 - [VAMP2_MOUSE]	P63044	7	8	43.1	45.69	0.944	0.853	4	2.1
71	Calretinin OS=Mus musculus GN=Calb2 PE=1 SV=3 - [CALB2_MOUSE]	Q08331	3	5	11.81	17.34	0.956	0.855	1.4	3.3
72	Secretogranin-2 OS=Mus musculus GN=Scg2 PE=1 SV=1 - [SCG2_MOUSE]	Q03517	9	12	14.75	20.91	0.957	0.856	2.6	6.4
73	Eukaryotic translation initiation factor 5A-1 OS=Mus musculus GN=Eif5a PE=1 SV=2 - [IF5A1_MOUSE]	P63242	5	5	21.43	24.03	0.902	0.856	2.2	4.7
74	LanC-like protein 1 OS=Mus musculus GN=Lancl1 PE=1 SV=1 - [LANC1_MOUSE]	O89112	7	6	16.54	12.53	1.03	0.856	3.3	5.6
75	Neurofilament heavy polypeptide OS=Mus musculus GN=Nefh PE=1 SV=3 - [NFH_MOUSE]	P19246	8	15	7.98	20.73	0.983	0.856	2.5	5.6
76	Endophilin-A2 OS=Mus musculus GN=Sh3gl1 PE=1 SV=1 - [SH3G1_MOUSE]	Q62419	8	8	16.85	18.48	0.914	0.858	2.8	14
77	EF-hand domain-containing protein D2 OS=Mus musculus GN=Efhd2 PE=1 SV=1 - [EFHD2_MOUSE]	Q9D8Y0	7	8	26.67	31.67	0.878	0.86	9	2.1
78	Actin-related protein 2/3 complex subunit 5 OS=Mus musculus GN=Arpc5 PE=2 SV=3 - [ARPC5_MOUSE]	Q9CPW4	6	7	43.71	52.32	0.905	0.861	5.2	1
79	Eukaryotic translation initiation factor 4H OS=Mus musculus GN=Eif4h PE=1 SV=3 - [IF4H_MOUSE]	Q9WUK2	5	7	22.58	29.44	0.87	0.862	2.9	4.9
80	cAMP-dependent protein kinase catalytic subunit alpha OS=Mus musculus GN=Prkaca PE=1 SV=3 - [KAPCA_MOUSE]	P05132	13	16	30.2	38.46	1.038	0.862	3.4	2.4
81	Glutaredoxin-1 OS=Mus musculus GN=Glrx PE=1 SV=3 - [GLRX1_MOUSE]	Q9QUH0	2	4	8.41	19.63	1.003	0.865	3	5.5
82	14-3-3 protein epsilon OS=Mus musculus GN=Ywhae PE=1 SV=1 - [1433E_MOUSE]	P62259	19	20	65.1	68.24	0.772	0.865	3.3	1.9
83	LIM zinc-binding domain-containing Nebulette OS=Mus musculus GN=Nebl PE=2 SV=1 - [LNEBL_MOUSE]	Q9DC07	4	6	15.56	23.7	0.87	0.866	3.7	2.4
84	Transaldolase OS=Mus musculus GN=Taldo1 PE=1 SV=2 - [TALDO_MOUSE]	Q93092	4	4	11.28	9.79	1.054	0.866	1	6.2
85	NAD-dependent protein deacetylase sirtuin-2 OS=Mus musculus GN=Sirt2 PE=1 SV=2 - [SIR2_MOUSE]	Q8VDQ8	17	19	32.39	37.02	0.93	0.866	2.3	1.4
86	Tropomyosin alpha-1 chain OS=Mus musculus GN=Tpm1 PE=1 SV=1 - [TPM1_MOUSE]	P58771	13	22	33.45	50	0.806	0.867	2.5	2.8
87	14-3-3 protein eta OS=Mus musculus GN=Ywhah PE=1 SV=2 - [1433F_MOUSE]	P68510	18	20	57.32	62.2	0.807	0.87	3.4	3.5
88	Guanine nucleotide-binding protein G(I)/G(S)/G(T) subunit beta-1 OS=Mus musculus GN=Gnb1 PE=1 SV=3 - [GBB1_MOUSE]	P62874	11	13	25.88	32.35	1.027	0.87	4.9	5.5
89	Lymphocyte antigen 6H OS=Mus musculus GN=Ly6h PE=2 SV=2 - [LY6H_MOUSE]	Q9WUC3	3	4	10.79	23.02	1.018	0.87	0.5	5.9
90	Actin-related protein 2/3 complex subunit 4 OS=Mus musculus GN=Arpc4 PE=1 SV=3 - [ARPC4_MOUSE]	P59999	8	8	36.9	49.4	0.879	0.871	3.1	0.4
91	Myelin-associated oligodendrocyte basic protein OS=Mus musculus GN=Mobp PE=1 SV=1 - [MOBP_MOUSE]	Q9D2P8	8	7	42.35	35.88	0.928	0.871	5.6	5.1
92	Cytochrome c oxidase subunit 7C, mitochondrial OS=Mus musculus GN=Cox7c PE=1 SV=1 - [COX7C_MOUSE]	P17665	4	4	46.03	46.03	0.677	0.872	17.3	4.2
93	14-3-3 protein beta/alpha OS=Mus musculus GN=Ywhab PE=1 SV=3 - [1433B_MOUSE]	Q9CQV8	20	20	65.85	65.85	0.81	0.873	3.4	2.6
94	Src substrate cortactin OS=Mus musculus GN=Cttn PE=1 SV=2 - [SRC8_MOUSE]	Q60598	7	15	14.65	25.64	1.03	0.874	0.3	4.4
95	Wiskott-Aldrich syndrome protein family member 1 OS=Mus musculus GN=Wasf1 PE=1 SV=2 - [WASF1_MOUSE]	Q8R5H6	4	11	8.41	18.07	0.994	0.874	4.2	0.3
96	Tropomyosin alpha-3 chain OS=Mus musculus GN=Tpm3 PE=1 SV=3 - [TPM3_MOUSE]	P21107	14	26	35.44	55.44	0.859	0.875	5.1	3.6
97	Rho GDP-dissociation inhibitor 1 OS=Mus musculus GN=Arhgdia PE=1 SV=3 - [GDIR1_MOUSE]	Q99PT1	9	11	45.59	46.57	1.008	0.875	2.8	3.7
98	Fructose-bisphosphate aldolase A OS=Mus musculus GN=Aldoa PE=1 SV=2 - [ALDOA_MOUSE]	P05064	30	30	58.24	69.51	1.053	0.875	0.7	1.6
99	L-lactate dehydrogenase A chain OS=Mus musculus GN=Ldha PE=1 SV=3 - [LDHA_MOUSE]	P06151	15	16	43.98	45.18	1.083	0.876	1.3	2.2
100	Myosin light polypeptide 6 OS=Mus musculus GN=Myl6 PE=1 SV=3 - [MYL6_MOUSE]	Q60605	10	8	62.91	59.6	0.938	0.877	2.8	3.2
101	Neutral amino acid transporter A OS=Mus musculus GN=Slc1a4 PE=1 SV=1 - [SATT_MOUSE]	O35874	3	2	5.08	3.57	0.902	0.878	1.3	5.1
102	Charged multivesicular body protein 4b OS=Mus musculus GN=Chmp4b PE=2 SV=2 - [CHM4B_MOUSE]	Q9D8B3	9	10	34.38	40.63	0.925	0.878	2.7	0.4
103	Phosphoglycerate mutase 1 OS=Mus musculus GN=Pgam1 PE=1 SV=3 - [PGAM1_MOUSE]	Q9DBJ1	16	14	59.84	65.75	0.936	0.878	1.5	2.5
104	Vesicular inhibitory amino acid transporter OS=Mus musculus GN=Slc32a1 PE=1 SV=3 - [VIAAT_MOUSE]	O35633	6	8	11.62	12.95	1.157	0.879	1.4	7.8
105	Proteasome subunit alpha type-1 OS=Mus musculus GN=Psma1 PE=1 SV=1 - [PSA1_MOUSE]	Q9R1P4	4	7	17.49	27.38	1.015	0.879	3.1	2.4
106	Proteasome subunit alpha type-5 OS=Mus musculus GN=Psma5 PE=1 SV=1 - [PSA5_MOUSE]	Q9Z2U1	4	5	17.43	22.41	0.961	0.881	2.8	5.4
107	Cysteine and glycine-rich protein 1 OS=Mus musculus GN=Csrp1 PE=1 SV=3 - [CSRP1_MOUSE]	P97315	6	7	36.27	42.49	0.997	0.882	2.1	3
108	UMP-CMP kinase OS=Mus musculus GN=Cmpk1 PE=1 SV=1 - [KCY_MOUSE]	Q9DBP5	4	5	19.39	24.49	0.887	0.884	8	2.1
109	Reticulon-1 OS=Mus musculus GN=Rtn1 PE=1 SV=1 - [RTN1_MOUSE]	Q8K0T0	15	12	24.36	16.67	0.916	0.884	1	10.5
110	Proteasome subunit alpha type-3 OS=Mus musculus GN=Psma3 PE=1 SV=3 - [PSA3_MOUSE]	O70435	4	8	12.55	29.8	0.939	0.885	1.1	4.3
111	WW domain-binding protein 2 OS=Mus musculus GN=Wbp2 PE=1 SV=1 - [WBP2_MOUSE]	P97765	2	3	4.98	8.81	0.974	0.885	0.4	1.5
112	Dynamin-3 OS=Mus musculus GN=Dnm3 PE=1 SV=1 - [DYN3_MOUSE]	Q8BZ98	29	36	27.58	27.93	0.997	0.887	2.9	3.7
113	Annexin A6 OS=Mus musculus GN=Anxa6 PE=1 SV=3 - [ANXA6_MOUSE]	P14824	21	24	35.22	33.73	1.032	0.889	1.3	2.5
114	Protein phosphatase 1 regulatory subunit 7 OS=Mus musculus GN=Ppp1r7 PE=1 SV=2 - [PP1R7_MOUSE]	Q3UM45	4	5	12.47	18.84	1.024	0.89	4.3	2.2
115	Epsin-2 OS=Mus musculus GN=Epn2 PE=1 SV=1 - [EPN2_MOUSE]	Q8CHU3	4	3	7.39	7.23	1.329	0.89	11.1	3
116	T-complex protein 1 subunit theta OS=Mus musculus GN=Cct8 PE=1 SV=3 - [TCPQ_MOUSE]	P42932	12	21	21.9	39.42	1.054	0.89	2.5	0.9
117	Proteasome subunit beta type-4 OS=Mus musculus GN=Psmb4 PE=1 SV=1 - [PSB4_MOUSE]	P99026	2	4	7.2	18.56	0.95	0.891	3.8	2.3
118	Hypoxanthine-guanine phosphoribosyltransferase OS=Mus musculus GN=Hprt1 PE=1 SV=3 - [HPRT_MOUSE]	P00493	3	5	15.6	23.39	1.011	0.891	4.2	5.1
119	Brain-specific angiogenesis inhibitor 1-associated protein 2 OS=Mus musculus GN=Baiap2 PE=1 SV=2 - [BAIP2_MOUSE]	Q8BKX1	21	29	37.57	57.94	1.096	0.891	2.2	1.2
120	Casein kinase I isoform delta OS=Mus musculus GN=Csnk1d PE=1 SV=2 - [KC1D_MOUSE]	Q9DC28	4	4	9.64	9.88	1.183	0.892	8.4	2.3
121	Clathrin light chain A OS=Mus musculus GN=Clta PE=2 SV=2 - [CLCA_MOUSE]	O08585	8	11	26.81	31.06	0.699	0.893	11.4	3.6
122	Calcineurin subunit B type 1 OS=Mus musculus GN=Ppp3r1 PE=1 SV=3 - [CANB1_MOUSE]	Q63810	5	6	54.12	61.18	0.877	0.893	4.2	2.1
123	Microsomal glutathione S-transferase 3 OS=Mus musculus GN=Mgst3 PE=1 SV=1 - [MGST3_MOUSE]	Q9CPU4	5	3	37.91	33.99	1.143	0.893	1.8	3.6
124	Carbonic anhydrase 2 OS=Mus musculus GN=Ca2 PE=1 SV=4 - [CAH2_MOUSE]	P00920	12	14	60.38	65.38	1.009	0.894	0.7	0.4
125	Beta-soluble NSF attachment protein OS=Mus musculus GN=Napb PE=1 SV=2 - [SNAB_MOUSE]	P28663	20	20	63.76	58.72	0.948	0.894	1.5	3.4
126	Peptidyl-prolyl cis-trans isomerase FKBP1A OS=Mus musculus GN=Fkbp1a PE=1 SV=2 - [FKB1A_MOUSE]	P26883	3	3	28.7	29.63	0.919	0.895	1.2	4.9
127	V-type proton ATPase subunit C 1 OS=Mus musculus GN=Atp6v1c1 PE=1 SV=4 - [VATC1_MOUSE]	Q9Z1G3	23	24	46.07	51.05	1.033	0.896	2	3.2
128	V-type proton ATPase subunit E 1 OS=Mus musculus GN=Atp6v1e1 PE=1 SV=2 - [VATE1_MOUSE]	P50518	23	23	65.04	65.93	0.956	0.897	1.5	2.3
129	Annexin A7 OS=Mus musculus GN=Anxa7 PE=2 SV=2 - [ANXA7_MOUSE]	Q07076	14	13	26.35	25.7	1.005	0.897	0.7	2.9
130	Myc box-dependent-interacting protein 1 OS=Mus musculus GN=Bin1 PE=1 SV=1 - [BIN1_MOUSE]	O08539	16	24	29.59	41.5	0.933	0.898	1.9	0.8
131	CB1 cannabinoid receptor-interacting protein 1 OS=Mus musculus GN=Cnrip1 PE=1 SV=1 - [CNRP1_MOUSE]	Q5M8N0	4	7	34.15	55.49	1.006	0.898	1.7	0.2
132	V-type proton ATPase subunit H OS=Mus musculus GN=Atp6v1h PE=1 SV=1 - [VATH_MOUSE]	Q8BVE3	19	21	50.31	46.38	0.999	0.899	1.8	1.7
133	Peroxiredoxin-2 OS=Mus musculus GN=Prdx2 PE=1 SV=3 - [PRDX2_MOUSE]	Q61171	11	8	43.43	40.91	0.923	0.9	0.8	2.5
134	Glutathione S-transferase P 1 OS=Mus musculus GN=Gstp1 PE=1 SV=2 - [GSTP1_MOUSE]	P19157	8	11	51.9	54.76	0.968	0.9	1.2	1.2
135	Cystatin-C OS=Mus musculus GN=Cst3 PE=2 SV=2 - [CYTC_MOUSE]	P21460	2	5	16.43	31.43	0.985	0.9	1.8	4
136	Ubiquitin-conjugating enzyme E2 N OS=Mus musculus GN=Ube2n PE=1 SV=1 - [UBE2N_MOUSE]	P61089	5	7	29.61	52.63	1.007	0.901	3	3.3
137	T-complex protein 1 subunit epsilon OS=Mus musculus GN=Cct5 PE=1 SV=1 - [TCPE_MOUSE]	P80316	7	15	13.68	28.65	0.991	0.901	3.4	1.7
138	Synaptogyrin-1 OS=Mus musculus GN=Syngr1 PE=1 SV=2 - [SNG1_MOUSE]	O55100	3	4	13.25	28.63	0.711	0.901	4.9	3.6
139	Syntaxin-binding protein 1 OS=Mus musculus GN=Stxbp1 PE=1 SV=2 - [STXB1_MOUSE]	O08599	46	54	71.89	79.8	1.028	0.901	0.3	1.8
140	Transgelin-3 OS=Mus musculus GN=Tagln3 PE=1 SV=1 - [TAGL3_MOUSE]	Q9R1Q8	8	12	33.17	55.28	0.942	0.902	2.2	1.7
141	NSFL1 cofactor p47 OS=Mus musculus GN=Nsfl1c PE=1 SV=1 - [NSF1C_MOUSE]	Q9CZ44	2	10	6.76	28.65	0.984	0.902	7.8	1.6
142	Neuron-specific calcium-binding protein hippocalcin OS=Mus musculus GN=Hpca PE=1 SV=2 - [HPCA_MOUSE]	P84075	11	12	57.51	51.81	0.999	0.903	5.6	4.8
143	Myelin-associated glycoprotein OS=Mus musculus GN=Mag PE=1 SV=2 - [MAG_MOUSE]	P20917	13	14	23	28.27	0.913	0.903	0.2	2.5
144	Endophilin-A1 OS=Mus musculus GN=Sh3gl2 PE=1 SV=2 - [SH3G2_MOUSE]	Q62420	15	17	38.35	51.99	0.989	0.903	3.6	1.7
145	Leukocyte elastase inhibitor A OS=Mus musculus GN=Serpinb1a PE=1 SV=1 - [ILEUA_MOUSE]	Q9D154	8	9	20.32	20.32	0.909	0.903	3	0.5
146	Platelet-activating factor acetylhydrolase IB subunit beta OS=Mus musculus GN=Pafah1b2 PE=1 SV=2 - [PA1B2_MOUSE]	Q61206	3	2	8.73	6.55	0.99	0.903	3.8	1.6
147	Proteasome subunit alpha type-7 OS=Mus musculus GN=Psma7 PE=1 SV=1 - [PSA7_MOUSE]	Q9Z2U0	4	4	16.94	18.15	0.99	0.904	4.8	2
148	Ubiquitin-40S ribosomal protein S27a OS=Mus musculus GN=Rps27a PE=2 SV=2 - [RS27A_MOUSE]	P62983	12	10	55.13	48.72	0.954	0.904	4	3.4
149	Annexin A11 OS=Mus musculus GN=Anxa11 PE=1 SV=2 - [ANX11_MOUSE]	P97384	5	7	12.33	15.31	0.943	0.905	3.5	9.9
150	Alpha-soluble NSF attachment protein OS=Mus musculus GN=Napa PE=1 SV=1 - [SNAA_MOUSE]	Q9DB05	11	13	42.03	50.51	1.008	0.905	6.6	0.6
151	Leucine-rich repeat-containing protein 57 OS=Mus musculus GN=Lrrc57 PE=2 SV=1 - [LRC57_MOUSE]	Q9D1G5	5	7	18.41	32.22	0.978	0.906	3.2	4.6
152	Hemoglobin subunit alpha OS=Mus musculus GN=Hba PE=1 SV=2 - [HBA_MOUSE]	P01942	5	5	26.76	21.13	1.114	0.907	5	5.7
153	Protein DJ-1 OS=Mus musculus GN=Park7 PE=1 SV=1 - [PARK7_MOUSE]	Q99LX0	10	8	53.44	53.44	0.917	0.907	1	3.7
154	Cytoplasmic FMR1-interacting protein 2 OS=Mus musculus GN=Cyfip2 PE=1 SV=2 - [CYFP2_MOUSE]	Q5SQX6	27	37	20.91	28.33	1.037	0.907	2.9	2.7
155	NEDD8-conjugating enzyme Ubc12 OS=Mus musculus GN=Ube2m PE=2 SV=1 - [UBC12_MOUSE]	P61082	2	4	10.93	18.58	1.019	0.907		6.9
156	Ganglioside-induced differentiation-associated protein 1-like 1 OS=Mus musculus GN=Gdap1l1 PE=2 SV=1 - [GD1L1_MOUSE]	Q8VE33	3	3	9.46	9.46	0.98	0.909	3.3	4.7
157	V-type proton ATPase subunit D OS=Mus musculus GN=Atp6v1d PE=1 SV=1 - [VATD_MOUSE]	P57746	14	13	60.32	59.92	1.038	0.909	2.6	3.4
158	Protein-L-isoaspartate(D-aspartate) O-methyltransferase OS=Mus musculus GN=Pcmt1 PE=1 SV=3 - [PIMT_MOUSE]	P23506	6	6	45.37	36.12	0.977	0.909	4	11
159	Very-long-chain (3R)-3-hydroxyacyl-[acyl-carrier protein] dehydratase 3 OS=Mus musculus GN=ptplad1 PE=1 SV=2 - [HACD3_MOUSE]	Q8K2C9	5	6	19.06	19.34	1.052	0.909	2.9	6.8
160	Ras-related protein Rap-1A OS=Mus musculus GN=Rap1a PE=2 SV=1 - [RAP1A_MOUSE]	P62835	13	13	64.13	51.09	0.98	0.909	0.8	5.2
161	Estradiol 17-beta-dehydrogenase 12 OS=Mus musculus GN=Hsd17b12 PE=2 SV=1 - [DHB12_MOUSE]	O70503	5	4	17.63	13.78	0.997	0.91	4.6	10
162	Synaptopodin OS=Mus musculus GN=Synpo PE=1 SV=2 - [SYNPO_MOUSE]	Q8CC35	8	8	11.63	10.33	1.164	0.91	1.1	3.7
163	Astrocytic phosphoprotein PEA-15 OS=Mus musculus GN=Pea15 PE=1 SV=1 - [PEA15_MOUSE]	Q62048	5	6	32.31	45.38	0.772	0.91	5.8	2.6
164	Poly(rC)-binding protein 1 OS=Mus musculus GN=Pcbp1 PE=1 SV=1 - [PCBP1_MOUSE]	P60335	3	6	7.3	18.82	0.978	0.911	1	0.7
165	Complexin-1 OS=Mus musculus GN=Cplx1 PE=1 SV=1 - [CPLX1_MOUSE]	P63040	7	7	44.03	46.27	0.876	0.911	3.4	2.1
166	Glutamate decarboxylase 2 OS=Mus musculus GN=Gad2 PE=2 SV=1 - [DCE2_MOUSE]	P48320	6	7	9.4	5.98	0.977	0.911	2.8	1.6
167	Coactosin-like protein OS=Mus musculus GN=Cotl1 PE=1 SV=3 - [COTL1_MOUSE]	Q9CQI6	5	6	34.51	38.03	0.813	0.911	4.4	4.1
168	AP-2 complex subunit sigma OS=Mus musculus GN=Ap2s1 PE=1 SV=1 - [AP2S1_MOUSE]	P62743	4	5	21.13	35.92	0.849	0.911	19.1	5.6
169	Peptidyl-prolyl cis-trans isomerase D OS=Mus musculus GN=Ppid PE=1 SV=3 - [PPID_MOUSE]	Q9CR16	6	11	14.05	25.95	1.046	0.912	1.7	2.1
170	Probable phospholipid-transporting ATPase IA OS=Mus musculus GN=Atp8a1 PE=1 SV=1 - [AT8A1_MOUSE]	P70704	17	26	16.1	23.5	1.022	0.912	1.3	1.7
171	Septin-5 OS=Mus musculus GN=Sept5 PE=1 SV=2 - [SEPT5_MOUSE]	Q9Z2Q6	21	23	43.63	47.43	1.1	0.912	0.5	0.9
172	Profilin-2 OS=Mus musculus GN=Pfn2 PE=1 SV=3 - [PROF2_MOUSE]	Q9JJV2	6	7	37.14	50.71	0.915	0.913	1.5	2.8
173	Thy-1 membrane glycoprotein OS=Mus musculus GN=Thy1 PE=1 SV=1 - [THY1_MOUSE]	P01831	5	8	27.16	31.48	0.935	0.914	3.6	2.9
174	cAMP-dependent protein kinase type II-beta regulatory subunit OS=Mus musculus GN=Prkar2b PE=1 SV=3 - [KAP3_MOUSE]	P31324	14	15	37.74	37.74	1.01	0.915	3.3	0.7
175	Annexin A5 OS=Mus musculus GN=Anxa5 PE=1 SV=1 - [ANXA5_MOUSE]	P48036	11	11	35.11	38.24	0.8	0.916	2.9	0.9
176	A-kinase anchor protein 5 OS=Mus musculus GN=Akap5 PE=1 SV=2 - [AKAP5_MOUSE]	D3YVF0	6	7	16.64	24.03	0.899	0.916	3.9	3.4
177	Septin-4 OS=Mus musculus GN=Sept4 PE=1 SV=1 - [SEPT4_MOUSE]	P28661	12	17	24.27	36.61	1.001	0.916	1.9	1.4
178	Neuroligin-3 OS=Mus musculus GN=Nlgn3 PE=1 SV=2 - [NLGN3_MOUSE]	Q8BYM5	5	6	5.58	8	0.955	0.917	6	4.2
179	Sodium-dependent neutral amino acid transporter SLC6A17 OS=Mus musculus GN=Slc6a17 PE=1 SV=1 - [S6A17_MOUSE]	Q8BJI1	6	9	9.49	13.76	1.204	0.917	5.3	5.9
180	Alpha-crystallin B chain OS=Mus musculus GN=Cryab PE=1 SV=2 - [CRYAB_MOUSE]	P23927	5	7	41.14	42.86	1.009	0.918	4.4	2.6
181	Guanine deaminase OS=Mus musculus GN=Gda PE=1 SV=1 - [GUAD_MOUSE]	Q9R111	11	13	26.65	31.5	1.045	0.918	2.8	0.5
182	IST1 homolog OS=Mus musculus GN=Ist1 PE=2 SV=1 - [IST1_MOUSE]	Q9CX00	4	5	7.46	10.22	0.963	0.918	3.2	4.7
183	Proteasome subunit alpha type-6 OS=Mus musculus GN=Psma6 PE=1 SV=1 - [PSA6_MOUSE]	Q9QUM9	6	4	23.58	15.45	0.97	0.918	1.4	2.2
184	Unconventional myosin-Id OS=Mus musculus GN=Myo1d PE=1 SV=1 - [MYO1D_MOUSE]	Q5SYD0	8	27	6.06	28.93	0.976	0.918	3.5	2.4
185	T-complex protein 1 subunit alpha OS=Mus musculus GN=Tcp1 PE=1 SV=3 - [TCPA_MOUSE]	P11983	9	9	15.29	16.73	1.062	0.918	4.1	3.4
186	T-complex protein 1 subunit zeta OS=Mus musculus GN=Cct6a PE=1 SV=3 - [TCPZ_MOUSE]	P80317	9	16	18.46	29.76	1.04	0.918	1.5	1.8
187	V-type proton ATPase subunit G 2 OS=Mus musculus GN=Atp6v1g2 PE=2 SV=1 - [VATG2_MOUSE]	Q9WTT4	9	10	55.08	49.15	0.945	0.919	4.1	1.7
188	Triosephosphate isomerase OS=Mus musculus GN=Tpi1 PE=1 SV=4 - [TPIS_MOUSE]	P17751	14	17	50.17	51.51	0.978	0.919	1.5	0.6
189	Probable cationic amino acid transporter OS=Mus musculus GN=Slc7a14 PE=2 SV=1 - [S7A14_MOUSE]	Q8BXR1	4	4	5.19	5.19	1.013	0.92	1.4	3
190	Peptidyl-prolyl cis-trans isomerase FKBP2 OS=Mus musculus GN=Fkbp2 PE=1 SV=1 - [FKBP2_MOUSE]	P45878	3	6	14.29	28.57	0.856	0.92	2.6	1
191	Cytochrome c oxidase subunit 6C OS=Mus musculus GN=Cox6c PE=1 SV=3 - [COX6C_MOUSE]	Q9CPQ1	5	5	36.84	31.58	0.635	0.92	8.2	1.9
192	Oligodendrocyte-myelin glycoprotein OS=Mus musculus GN=Omg PE=1 SV=1 - [OMGP_MOUSE]	Q63912	8	9	15	16.36	0.84	0.921	5.6	2.2
193	Gamma-soluble NSF attachment protein OS=Mus musculus GN=Napg PE=1 SV=1 - [SNAG_MOUSE]	Q9CWZ7	16	17	44.87	53.21	0.966	0.921	2.6	2.2
194	Phosphoglycerate kinase 1 OS=Mus musculus GN=Pgk1 PE=1 SV=4 - [PGK1_MOUSE]	P09411	26	27	59.95	54.44	1.03	0.922	1.1	1
195	Guanine nucleotide-binding protein subunit beta-5 OS=Mus musculus GN=Gnb5 PE=1 SV=1 - [GBB5_MOUSE]	P62881	4	7	10.13	15.7	1.067	0.922	5.1	4.8
196	Synaptophysin OS=Mus musculus GN=Syp PE=1 SV=2 - [SYPH_MOUSE]	Q62277	13	11	53.82	50	1.247	0.923	2.5	2.5
197	Glucose-6-phosphate isomerase OS=Mus musculus GN=Gpi PE=1 SV=4 - [G6PI_MOUSE]	P06745	31	35	60.39	60.39	1.035	0.923	2.6	0.7
198	PEX5-related protein OS=Mus musculus GN=Pex5l PE=1 SV=2 - [PEX5R_MOUSE]	Q8C437	3	6	4.59	13.4	1	0.924	4.3	3.8
199	Vesicle-associated membrane protein 1 OS=Mus musculus GN=Vamp1 PE=1 SV=1 - [VAMP1_MOUSE]	Q62442	6	7	42.37	44.07	0.929	0.924	2.4	2
200	Adenylyl cyclase-associated protein 1 OS=Mus musculus GN=Cap1 PE=1 SV=4 - [CAP1_MOUSE]	P40124	9	14	21.52	32.28	1.009	0.925	3	2.2
201	Fascin OS=Mus musculus GN=Fscn1 PE=1 SV=4 - [FSCN1_MOUSE]	Q61553	8	11	18.86	18.05	0.977	0.925	0.6	1.8
202	Ras-related protein Ral-A OS=Mus musculus GN=Rala PE=1 SV=1 - [RALA_MOUSE]	P63321	9	13	39.32	54.85	0.955	0.925	5.4	3
203	Actin-related protein 2/3 complex subunit 2 OS=Mus musculus GN=Arpc2 PE=1 SV=3 - [ARPC2_MOUSE]	Q9CVB6	10	11	27.33	35.67	1.009	0.925	4.1	1.7
204	Neurochondrin OS=Mus musculus GN=Ncdn PE=1 SV=1 - [NCDN_MOUSE]	Q9Z0E0	15	20	20.71	30.86	1.02	0.925	0.8	2.3
205	AP-2 complex subunit beta OS=Mus musculus GN=Ap2b1 PE=1 SV=1 - [AP2B1_MOUSE]	Q9DBG3	40	44	42.58	45.14	1.096	0.926	1.9	3.3
206	Gamma-enolase OS=Mus musculus GN=Eno2 PE=1 SV=2 - [ENOG_MOUSE]	P17183	24	21	59.22	57.14	1.037	0.926	2.6	2.8
207	Aspartate aminotransferase, cytoplasmic OS=Mus musculus GN=Got1 PE=1 SV=3 - [AATC_MOUSE]	P05201	24	24	59.81	59.08	0.993	0.927	1.2	0.8
208	Peroxiredoxin-1 OS=Mus musculus GN=Prdx1 PE=1 SV=1 - [PRDX1_MOUSE]	P35700	15	11	54.27	43.22	0.965	0.927	1.6	3.3
209	Cadherin-13 OS=Mus musculus GN=Cdh13 PE=1 SV=2 - [CAD13_MOUSE]	Q9WTR5	2	7	3.64	14.85	0.998	0.927	5.4	3.8
210	Microtubule-associated proteins 1A/1B light chain 3A OS=Mus musculus GN=Map1lc3a PE=1 SV=1 - [MLP3A_MOUSE]	Q91VR7	4	4	24.79	24.79	1.059	0.927	2.9	2.9
211	Actin-related protein 2/3 complex subunit 1A OS=Mus musculus GN=Arpc1a PE=1 SV=1 - [ARC1A_MOUSE]	Q9R0Q6	9	12	20	24.86	1.016	0.928	2.4	4.5
212	Solute carrier family 2, facilitated glucose transporter member 3 OS=Mus musculus GN=Slc2a3 PE=1 SV=1 - [GTR3_MOUSE]	P32037	10	10	20.49	25.76	1.011	0.928	0.4	3.4
213	Rab GDP dissociation inhibitor alpha OS=Mus musculus GN=Gdi1 PE=1 SV=3 - [GDIA_MOUSE]	P50396	23	22	55.03	49.89	0.973	0.928	1.5	2.5
214	Pyruvate kinase PKM OS=Mus musculus GN=Pkm PE=1 SV=4 - [KPYM_MOUSE]	P52480	41	36	64.03	53.86	0.997	0.928	0.9	1
215	Cullin-associated NEDD8-dissociated protein 1 OS=Mus musculus GN=Cand1 PE=2 SV=2 - [CAND1_MOUSE]	Q6ZQ38	17	22	16.26	20.65	1.051	0.928	1.6	3.4
216	Synaptic vesicle membrane protein VAT-1 homolog OS=Mus musculus GN=Vat1 PE=1 SV=3 - [VAT1_MOUSE]	Q62465	5	6	15.76	20.2	1.055	0.928	4.1	1
217	Heat shock 70 kDa protein 4 OS=Mus musculus GN=Hspa4 PE=1 SV=1 - [HSP74_MOUSE]	Q61316	18	28	18.91	32.7	1.006	0.929	1.9	2.8
218	Heat shock protein 105 kDa OS=Mus musculus GN=Hsph1 PE=1 SV=2 - [HS105_MOUSE]	Q61699	10	14	11.19	14.1	0.983	0.929	7	3.2
219	Amphiphysin OS=Mus musculus GN=Amph PE=1 SV=1 - [AMPH_MOUSE]	Q7TQF7	24	23	30.17	33.38	0.981	0.929	3.5	2.5
220	Malate dehydrogenase, cytoplasmic OS=Mus musculus GN=Mdh1 PE=1 SV=3 - [MDHC_MOUSE]	P14152	18	17	44.61	47.31	0.963	0.929	2.6	1
221	G protein-regulated inducer of neurite outgrowth 1 OS=Mus musculus GN=Gprin1 PE=1 SV=2 - [GRIN1_MOUSE]	Q3UNH4	26	55	32.94	56.65	0.91	0.929	3.3	0.5
222	cGMP-dependent 3',5'-cyclic phosphodiesterase OS=Mus musculus GN=Pde2a PE=1 SV=3 - [PDE2A_MOUSE]	Q922S4	8	16	11.14	22.82	1.071	0.93	1.9	4.5
223	Tumor protein D54 OS=Mus musculus GN=Tpd52l2 PE=1 SV=1 - [TPD54_MOUSE]	Q9CYZ2	3	6	10.45	19.55	1.156	0.93		6.4
224	Ectonucleotide pyrophosphatase/phosphodiesterase family member 6 OS=Mus musculus GN=Enpp6 PE=2 SV=1 - [ENPP6_MOUSE]	Q8BGN3	4	10	9.09	27.05	0.992	0.93	10.2	3.9
225	Serine/threonine-protein phosphatase 2A 65 kDa regulatory subunit A alpha isoform OS=Mus musculus GN=Ppp2r1a PE=1 SV=3 - [2AAA_MOUSE]	Q76MZ3	24	25	41.6	39.73	0.998	0.93	1.6	3.8
226	Vacuolar protein sorting-associated protein 35 OS=Mus musculus GN=Vps35 PE=1 SV=1 - [VPS35_MOUSE]	Q9EQH3	6	11	8.92	14.07	1.11	0.932	2.6	2.2
227	LIM and SH3 domain protein 1 OS=Mus musculus GN=Lasp1 PE=1 SV=1 - [LASP1_MOUSE]	Q61792	8	10	30.42	28.14	0.981	0.933	3.6	1.6
228	cAMP-dependent protein kinase catalytic subunit beta OS=Mus musculus GN=Prkacb PE=1 SV=2 - [KAPCB_MOUSE]	P68181	13	16	31.34	39.32	1.04	0.933	1	2.6
229	Voltage-gated potassium channel subunit beta-2 OS=Mus musculus GN=Kcnab2 PE=2 SV=1 - [KCAB2_MOUSE]	P62482	14	19	43.05	44.14	1.055	0.933	1.2	0.9
230	T-complex protein 1 subunit beta OS=Mus musculus GN=Cct2 PE=1 SV=4 - [TCPB_MOUSE]	P80314	12	16	26.54	32.9	1.054	0.934	1.8	2
231	Secernin-1 OS=Mus musculus GN=Scrn1 PE=1 SV=1 - [SCRN1_MOUSE]	Q9CZC8	3	4	6.52	9.66	0.906	0.934	6.1	1.9
232	Regulator of G-protein signaling 7 OS=Mus musculus GN=Rgs7 PE=1 SV=2 - [RGS7_MOUSE]	O54829	10	13	23.24	26.44	1.014	0.934	4.2	4
233	Vimentin OS=Mus musculus GN=Vim PE=1 SV=3 - [VIME_MOUSE]	P20152	14	16	28.11	33.48	1.139	0.935	2.6	1.4
234	Carbonyl reductase [NADPH] 1 OS=Mus musculus GN=Cbr1 PE=1 SV=3 - [CBR1_MOUSE]	P48758	7	9	32.13	34.66	1.059	0.935	4.6	7.2
235	Programmed cell death 6-interacting protein OS=Mus musculus GN=Pdcd6ip PE=1 SV=3 - [PDC6I_MOUSE]	Q9WU78	2	7	2.07	8.06	0.999	0.936	2.2	1.9
236	Clathrin coat assembly protein AP180 OS=Mus musculus GN=Snap91 PE=1 SV=1 - [AP180_MOUSE]	Q61548	17	20	23.53	27.19	1.026	0.936	4.3	0.5
237	26S proteasome non-ATPase regulatory subunit 3 OS=Mus musculus GN=Psmd3 PE=1 SV=3 - [PSMD3_MOUSE]	P14685	3	4	6.23	8.49	1.011	0.936	8.9	2.2
238	Nck-associated protein 1 OS=Mus musculus GN=Nckap1 PE=1 SV=2 - [NCKP1_MOUSE]	P28660	24	24	21.63	21.1	1.048	0.937	1.1	1.3
239	Tryptophan--tRNA ligase, cytoplasmic OS=Mus musculus GN=Wars PE=1 SV=2 - [SYWC_MOUSE]	P32921	2	3	3.95	7.07	0.978	0.938	1.5	5.2
240	Aspartoacylase OS=Mus musculus GN=Aspa PE=1 SV=2 - [ACY2_MOUSE]	Q8R3P0	3	3	9.94	9.94	1.069	0.938	9.6	4.1
241	Ferritin heavy chain OS=Mus musculus GN=Fth1 PE=1 SV=2 - [FRIH_MOUSE]	P09528	4	2	24.18	13.19	0.98	0.938	1.3	6.9
242	T-complex protein 1 subunit eta OS=Mus musculus GN=Cct7 PE=1 SV=1 - [TCPH_MOUSE]	P80313	5	7	9.93	15.44	1.037	0.938	2.9	2.3
243	Protein kinase C and casein kinase substrate in neurons protein 1 OS=Mus musculus GN=Pacsin1 PE=1 SV=1 - [PACN1_MOUSE]	Q61644	28	32	49.21	61.22	0.999	0.939	3.4	0.5
244	Vesicular glutamate transporter 1 OS=Mus musculus GN=Slc17a7 PE=1 SV=2 - [VGLU1_MOUSE]	Q3TXX4	12	13	20.89	20.89	1.083	0.939	2.5	1.3
245	Septin-8 OS=Mus musculus GN=Sept8 PE=1 SV=4 - [SEPT8_MOUSE]	Q8CHH9	15	18	24.01	29.14	0.971	0.939	1.3	2.2
246	Calcium-binding protein 39 OS=Mus musculus GN=Cab39 PE=1 SV=2 - [CAB39_MOUSE]	Q06138	4	6	9.68	14.08	1.056	0.94	4.3	7.9
247	Rab GDP dissociation inhibitor beta OS=Mus musculus GN=Gdi2 PE=1 SV=1 - [GDIB_MOUSE]	Q61598	17	19	43.82	49.89	0.987	0.94	2.3	2
248	Protein SOGA3 OS=Mus musculus GN=Soga3 PE=2 SV=2 - [SOGA3_MOUSE]	Q6NZL0	4	16	4.55	16.19	1.036	0.941	4.2	5.9
249	V-type proton ATPase catalytic subunit A OS=Mus musculus GN=Atp6v1a PE=1 SV=2 - [VATA_MOUSE]	P50516	39	41	64.83	58.83	1.044	0.941	1.1	1
250	Ras-related protein M-Ras OS=Mus musculus GN=Mras PE=1 SV=1 - [RASM_MOUSE]	O08989	3	3	13.46	13.46	1.003	0.941	4.5	7.3
251	60S ribosomal protein L23 OS=Mus musculus GN=Rpl23 PE=1 SV=1 - [RL23_MOUSE]	P62830	3	3	23.57	18.57	1.035	0.941	3.6	9.3
252	Calcium/calmodulin-dependent protein kinase type II subunit delta OS=Mus musculus GN=Camk2d PE=1 SV=1 - [KCC2D_MOUSE]	Q6PHZ2	24	28	42.48	49.9	1.144	0.941	7.1	1.3
253	Synapsin-2 OS=Mus musculus GN=Syn2 PE=1 SV=2 - [SYN2_MOUSE]	Q64332	26	29	55.12	55.97	1.032	0.941	0.9	0.7
254	Catenin delta-1 OS=Mus musculus GN=Ctnnd1 PE=1 SV=2 - [CTND1_MOUSE]	P30999	2	4	2.99	4.58	1.006	0.942	7.9	10
255	Glycerol-3-phosphate dehydrogenase [NAD(+)], cytoplasmic OS=Mus musculus GN=Gpd1 PE=1 SV=3 - [GPDA_MOUSE]	P13707	8	6	17.48	13.18	1.051	0.942	3.8	4.8
256	Myosin regulatory light chain 12B OS=Mus musculus GN=Myl12b PE=1 SV=2 - [ML12B_MOUSE]	Q3THE2	2	4	17.44	27.91	0.96	0.942	3.3	5.9
257	Glycerol-3-phosphate dehydrogenase 1-like protein OS=Mus musculus GN=Gpd1l PE=1 SV=2 - [GPD1L_MOUSE]	Q3ULJ0	8	10	18.52	33.9	1.037	0.942	3	1
258	Neural cell adhesion molecule 2 OS=Mus musculus GN=Ncam2 PE=2 SV=1 - [NCAM2_MOUSE]	O35136	9	14	9.44	16.13	0.916	0.942	1.4	2.6
259	Glucose-6-phosphate 1-dehydrogenase X OS=Mus musculus GN=G6pdx PE=1 SV=3 - [G6PD1_MOUSE]	Q00612	3	4	4.85	8.74	0.903	0.943	2.4	10
260	Apolipoprotein E OS=Mus musculus GN=Apoe PE=1 SV=2 - [APOE_MOUSE]	P08226	7	10	24.12	31.51	1.055	0.943	4	2.7
261	Neuronal membrane glycoprotein M6-b OS=Mus musculus GN=Gpm6b PE=1 SV=2 - [GPM6B_MOUSE]	P35803	7	9	21.95	25.91	0.871	0.944	1.9	4.1
262	Actin-related protein 2/3 complex subunit 5-like protein OS=Mus musculus GN=Arpc5l PE=1 SV=1 - [ARP5L_MOUSE]	Q9D898	4	6	28.76	41.83	0.967	0.944	5.5	2.8
263	CDP-diacylglycerol--inositol 3-phosphatidyltransferase OS=Mus musculus GN=Cdipt PE=1 SV=1 - [CDIPT_MOUSE]	Q8VDP6	2	3	11.27	15.96	0.82	0.945	12.9	9.3
264	Casein kinase II subunit beta OS=Mus musculus GN=Csnk2b PE=1 SV=1 - [CSK2B_MOUSE]	P67871	4	4	13.02	13.02	0.959	0.945	4.5	6.4
265	Profilin-1 OS=Mus musculus GN=Pfn1 PE=1 SV=2 - [PROF1_MOUSE]	P62962	5	6	41.43	59.29	0.956	0.945	2.6	2.6
266	Phosphatidylinositol 4-phosphate 5-kinase type-1 gamma OS=Mus musculus GN=Pip5k1c PE=1 SV=2 - [PI51C_MOUSE]	O70161	12	16	24.21	23.45	1.053	0.945	4.8	3.1
267	Putative adenosylhomocysteinase 3 OS=Mus musculus GN=Ahcyl2 PE=1 SV=1 - [SAHH3_MOUSE]	Q68FL4	10	11	15.66	15.82	1.044	0.945	3.7	1.2
268	Serine/threonine-protein phosphatase 2B catalytic subunit alpha isoform OS=Mus musculus GN=Ppp3ca PE=1 SV=1 - [PP2BA_MOUSE]	P63328	26	22	38.58	42.8	1.02	0.945	1.1	2.7
269	Ubiquitin-conjugating enzyme E2 variant 2 OS=Mus musculus GN=Ube2v2 PE=2 SV=4 - [UB2V2_MOUSE]	Q9D2M8	4	7	17.24	35.86	1.006	0.945	4.4	3.6
270	Aspartyl aminopeptidase OS=Mus musculus GN=Dnpep PE=2 SV=2 - [DNPEP_MOUSE]	Q9Z2W0	2	2	4.23	4.23	1.015	0.946	2.4	11.2
271	Synapsin-1 OS=Mus musculus GN=Syn1 PE=1 SV=2 - [SYN1_MOUSE]	O88935	35	34	63.74	63.17	1.004	0.946	1.5	0.8
272	Obg-like ATPase 1 OS=Mus musculus GN=Ola1 PE=1 SV=1 - [OLA1_MOUSE]	Q9CZ30	3	5	7.32	13.13	1.066	0.946	5.4	1.9
273	Sodium/potassium-transporting ATPase subunit beta-3 OS=Mus musculus GN=Atp1b3 PE=1 SV=1 - [AT1B3_MOUSE]	P97370	2	3	5.76	10.79	0.876	0.947	4.2	3.4
274	Puromycin-sensitive aminopeptidase OS=Mus musculus GN=Npepps PE=1 SV=2 - [PSA_MOUSE]	Q11011	17	17	18.59	17.39	0.957	0.947	1.7	1.6
275	EH domain-containing protein 3 OS=Mus musculus GN=Ehd3 PE=1 SV=2 - [EHD3_MOUSE]	Q9QXY6	14	14	34.21	29.16	1.011	0.948	3.1	1.2
276	Alanine--tRNA ligase, cytoplasmic OS=Mus musculus GN=Aars PE=1 SV=1 - [SYAC_MOUSE]	Q8BGQ7	5	10	5.27	10.64	0.97	0.948	3.4	5.1
277	Dehydrogenase/reductase SDR family member 1 OS=Mus musculus GN=Dhrs1 PE=2 SV=1 - [DHRS1_MOUSE]	Q99L04	6	3	23.96	13.42	1.09	0.949	1.2	5.3
278	Basigin OS=Mus musculus GN=Bsg PE=1 SV=2 - [BASI_MOUSE]	P18572	5	8	14.14	25.19	0.927	0.949	5.5	3.5
279	Heat shock protein HSP 90-alpha OS=Mus musculus GN=Hsp90aa1 PE=1 SV=4 - [HS90A_MOUSE]	P07901	32	39	36.43	43.79	1.047	0.949	2.6	2.7
280	Septin-2 OS=Mus musculus GN=Sept2 PE=1 SV=2 - [SEPT2_MOUSE]	P42208	6	9	20.78	32.41	0.971	0.95	1.1	3.1
281	V-type proton ATPase subunit B, brain isoform OS=Mus musculus GN=Atp6v1b2 PE=1 SV=1 - [VATB2_MOUSE]	P62814	28	30	60.47	61.45	1.06	0.95	1.2	0.8
282	Ezrin OS=Mus musculus GN=Ezr PE=1 SV=3 - [EZRI_MOUSE]	P26040	15	20	19.11	26.79	0.937	0.95	1.7	2.3
283	Gelsolin OS=Mus musculus GN=Gsn PE=1 SV=3 - [GELS_MOUSE]	P13020	2	5	1.54	7.18	0.864	0.95		2
284	Dual specificity mitogen-activated protein kinase kinase 1 OS=Mus musculus GN=Map2k1 PE=1 SV=2 - [MP2K1_MOUSE]	P31938	9	12	19.08	32.32	1.079	0.95	2.8	4.8
285	Reticulon-4 OS=Mus musculus GN=Rtn4 PE=1 SV=2 - [RTN4_MOUSE]	Q99P72	18	23	17.99	24.18	0.974	0.95	4.8	2
286	Ras-related protein Rab-6A OS=Mus musculus GN=Rab6a PE=1 SV=4 - [RAB6A_MOUSE]	P35279	12	14	49.52	63.46	0.845	0.95	5.2	1
287	Homer protein homolog 3 OS=Mus musculus GN=Homer3 PE=1 SV=2 - [HOME3_MOUSE]	Q99JP6	3	6	10.11	16.85	0.987	0.95	8.1	4
288	Ras-related C3 botulinum toxin substrate 1 OS=Mus musculus GN=Rac1 PE=1 SV=1 - [RAC1_MOUSE]	P63001	6	6	19.27	19.27	0.965	0.951	2.6	1
289	Microtubule-associated protein 1A OS=Mus musculus GN=Map1a PE=1 SV=2 - [MAP1A_MOUSE]	Q9QYR6	19	38	8.57	14.37	1.012	0.951	2.9	0.9
290	Aldehyde dehydrogenase family 3 member B1 OS=Mus musculus GN=Aldh3b1 PE=2 SV=1 - [AL3B1_MOUSE]	Q80VQ0	2	5	4.91	11.54	0.931	0.952	1.8	4.8
291	Septin-7 OS=Mus musculus GN=Sept7 PE=1 SV=1 - [SEPT7_MOUSE]	O55131	31	34	52.75	56.65	0.999	0.952	3.1	1.5
292	Pyridoxal kinase OS=Mus musculus GN=Pdxk PE=1 SV=1 - [PDXK_MOUSE]	Q8K183	7	9	25	33.33	1.007	0.952	1	1.3
293	Alpha-actinin-1 OS=Mus musculus GN=Actn1 PE=1 SV=1 - [ACTN1_MOUSE]	Q7TPR4	15	18	17.6	19.39	1.147	0.952	3.7	3.9
294	Neurobeachin OS=Mus musculus GN=Nbea PE=2 SV=1 - [NBEA_MOUSE]	Q9EPN1	5	5	1.4	1.23	1.059	0.952	2	0.6
295	T-complex protein 1 subunit gamma OS=Mus musculus GN=Cct3 PE=1 SV=1 - [TCPG_MOUSE]	P80318	10	16	16.51	26.42	1.017	0.953	1.2	1.6
296	Transitional endoplasmic reticulum ATPase OS=Mus musculus GN=Vcp PE=1 SV=4 - [TERA_MOUSE]	Q01853	35	31	43.8	35.61	1.031	0.953	3.2	0.3
297	Dynactin subunit 2 OS=Mus musculus GN=Dctn2 PE=1 SV=3 - [DCTN2_MOUSE]	Q99KJ8	14	17	30.35	37.06	1.014	0.953	1.1	3.7
298	Monoacylglycerol lipase ABHD12 OS=Mus musculus GN=Abhd12 PE=1 SV=2 - [ABD12_MOUSE]	Q99LR1	12	10	37.19	29.4	1.085	0.953	4.9	3.6
299	FXYD domain-containing ion transport regulator 6 OS=Mus musculus GN=Fxyd6 PE=1 SV=2 - [FXYD6_MOUSE]	Q9D164	2	3	40.43	40.43	1.065	0.953	3.5	3.4
300	Neuronal-specific septin-3 OS=Mus musculus GN=Sept3 PE=1 SV=2 - [SEPT3_MOUSE]	Q9Z1S5	12	13	28	28.86	1.073	0.954	2.3	1.6
301	Epsin-1 OS=Mus musculus GN=Epn1 PE=1 SV=3 - [EPN1_MOUSE]	Q80VP1	3	5	8	14.96	1.093	0.954	1.6	4.6
302	Dynamin-1-like protein OS=Mus musculus GN=Dnm1l PE=1 SV=2 - [DNM1L_MOUSE]	Q8K1M6	23	21	30.05	32.08	1.034	0.954	2.2	0.2
303	Actin-related protein 3 OS=Mus musculus GN=Actr3 PE=1 SV=3 - [ARP3_MOUSE]	Q99JY9	10	15	30.38	33.97	1.031	0.954	6.1	2.8
304	DnaJ homolog subfamily A member 2 OS=Mus musculus GN=Dnaja2 PE=1 SV=1 - [DNJA2_MOUSE]	Q9QYJ0	5	7	14.32	17.96	1.049	0.954	5.3	2.5
305	Up-regulated during skeletal muscle growth protein 5 OS=Mus musculus GN=Usmg5 PE=1 SV=1 - [USMG5_MOUSE]	Q78IK2	4	2	55.17	27.59	0.971	0.954	8.8	5.2
306	V-type proton ATPase subunit F OS=Mus musculus GN=Atp6v1f PE=1 SV=2 - [VATF_MOUSE]	Q9D1K2	9	8	83.19	70.59	0.881	0.954	1.8	3.9
307	Rho-related GTP-binding protein RhoG OS=Mus musculus GN=Rhog PE=2 SV=1 - [RHOG_MOUSE]	P84096	5	8	35.08	42.41	0.895	0.955	7.2	2.8
308	Hydroxyacylglutathione hydrolase, mitochondrial OS=Mus musculus GN=Hagh PE=1 SV=2 - [GLO2_MOUSE]	Q99KB8	4	4	13.27	13.59	0.948	0.955	0.7	5.9
309	Coronin-1B OS=Mus musculus GN=Coro1b PE=1 SV=1 - [COR1B_MOUSE]	Q9WUM3	3	5	3.72	6.4	1.01	0.956	1.6	0.4
310	Reticulon-3 OS=Mus musculus GN=Rtn3 PE=1 SV=2 - [RTN3_MOUSE]	Q9ES97	8	20	8.09	18.46	1.002	0.956	0.9	2.8
311	Adenylyl cyclase-associated protein 2 OS=Mus musculus GN=Cap2 PE=1 SV=1 - [CAP2_MOUSE]	Q9CYT6	7	9	20.38	25.84	0.993	0.957	3.1	1.1
312	Adaptin ear-binding coat-associated protein 1 OS=Mus musculus GN=Necap1 PE=1 SV=2 - [NECP1_MOUSE]	Q9CR95	8	7	20.73	22.55	0.933	0.957	8.9	2.3
313	TOM1-like protein 2 OS=Mus musculus GN=Tom1l2 PE=2 SV=1 - [TM1L2_MOUSE]	Q5SRX1	3	7	5.72	12.03	0.942	0.957	3.5	5
314	Rabphilin-3A OS=Mus musculus GN=Rph3a PE=1 SV=2 - [RP3A_MOUSE]	P47708	10	15	23.64	30.54	0.926	0.958	3.9	4
315	Microtubule-associated protein 2 OS=Mus musculus GN=Map2 PE=1 SV=2 - [MTAP2_MOUSE]	P20357	30	41	15.75	25.55	0.971	0.958	3.4	0.6
316	AP2-associated protein kinase 1 OS=Mus musculus GN=Aak1 PE=1 SV=2 - [AAK1_MOUSE]	Q3UHJ0	13	21	19.29	29.2	1.012	0.958	2	3.6
317	Ras-related protein Rab-2A OS=Mus musculus GN=Rab2a PE=1 SV=1 - [RAB2A_MOUSE]	P53994	10	12	51.89	57.08	0.982	0.958	0.9	2.1
318	Serine/threonine-protein phosphatase 2A catalytic subunit alpha isoform OS=Mus musculus GN=Ppp2ca PE=1 SV=1 - [PP2AA_MOUSE]	P63330	9	7	30.1	25.89	1.016	0.959	2	4.5
319	Heat shock protein HSP 90-beta OS=Mus musculus GN=Hsp90ab1 PE=1 SV=3 - [HS90B_MOUSE]	P11499	28	36	35.91	40.06	1.072	0.959	1.6	0.7
320	Glucosidase 2 subunit beta OS=Mus musculus GN=Prkcsh PE=1 SV=1 - [GLU2B_MOUSE]	O08795	6	7	9.79	10.94	0.96	0.959	3.3	1.8
321	Solute carrier family 12 member 2 OS=Mus musculus GN=Slc12a2 PE=1 SV=2 - [S12A2_MOUSE]	P55012	10	16	11.12	14.85	0.904	0.96	1.3	2.6
322	Charged multivesicular body protein 6 OS=Mus musculus GN=Chmp6 PE=2 SV=2 - [CHMP6_MOUSE]	P0C0A3	2	3	9.5	13	0.815	0.96	5.7	5.8
323	Rho-related GTP-binding protein RhoB OS=Mus musculus GN=Rhob PE=1 SV=1 - [RHOB_MOUSE]	P62746	6	5	22.96	20.92	0.946	0.96	5	2.2
324	Proteasome subunit beta type-6 OS=Mus musculus GN=Psmb6 PE=1 SV=3 - [PSB6_MOUSE]	Q60692	2	3	8.82	13.03	0.945	0.96	5.2	2.4
325	Sodium- and chloride-dependent GABA transporter 1 OS=Mus musculus GN=Slc6a1 PE=1 SV=2 - [SC6A1_MOUSE]	P31648	7	7	16.03	15.36	0.949	0.96	5.3	8.5
326	Ubiquitin thioesterase OTUB1 OS=Mus musculus GN=Otub1 PE=1 SV=2 - [OTUB1_MOUSE]	Q7TQI3	5	10	21.4	52.4	0.957	0.96	4.6	1.2
327	Glutathione S-transferase Mu 5 OS=Mus musculus GN=Gstm5 PE=1 SV=1 - [GSTM5_MOUSE]	P48774	7	11	32.14	42.41	1.005	0.96	1.8	1.7
328	GTP-binding protein Rheb OS=Mus musculus GN=Rheb PE=1 SV=1 - [RHEB_MOUSE]	Q921J2	3	5	16.3	25	0.958	0.961	3.7	0.7
329	Ankyrin-3 OS=Mus musculus GN=Ank3 PE=1 SV=1 - [ANK3_MOUSE]	G5E8K5	31	38	14.99	18.51	1.007	0.961	1.3	2.8
330	AP-2 complex subunit alpha-1 OS=Mus musculus GN=Ap2a1 PE=1 SV=1 - [AP2A1_MOUSE]	P17426	34	43	34.39	48.62	1.066	0.961	0.7	0.7
331	Microtubule-associated protein 4 OS=Mus musculus GN=Map4 PE=1 SV=3 - [MAP4_MOUSE]	P27546	13	19	12.98	18.67	0.916	0.962	1.6	3.7
332	Synaptogyrin-3 OS=Mus musculus GN=Syngr3 PE=1 SV=1 - [SNG3_MOUSE]	Q8R191	7	7	31.44	31.44	1.09	0.962	0.3	4.4
333	Ubiquitin-like modifier-activating enzyme 1 OS=Mus musculus GN=Uba1 PE=1 SV=1 - [UBA1_MOUSE]	Q02053	22	30	27.6	30.15	0.96	0.963	0.8	2.2
334	MAGUK p55 subfamily member 6 OS=Mus musculus GN=Mpp6 PE=1 SV=1 - [MPP6_MOUSE]	Q9JLB0	6	12	9.4	18.44	0.995	0.963	2.7	1
335	Aldose reductase OS=Mus musculus GN=Akr1b1 PE=1 SV=3 - [ALDR_MOUSE]	P45376	7	7	20.25	20.25	1.02	0.963	4.1	4.6
336	Synaptotagmin-12 OS=Mus musculus GN=Syt12 PE=2 SV=1 - [SYT12_MOUSE]	Q920N7	4	6	8.79	14.01	0.926	0.963	5.4	1.4
337	Inositol monophosphatase 1 OS=Mus musculus GN=Impa1 PE=1 SV=1 - [IMPA1_MOUSE]	O55023	3	4	13.72	16.61	0.91	0.963	3.7	6.9
338	Major prion protein OS=Mus musculus GN=Prnp PE=1 SV=2 - [PRIO_MOUSE]	P04925	4	6	10.24	17.72	1.059	0.963	6.6	3.5
339	T-complex protein 1 subunit delta OS=Mus musculus GN=Cct4 PE=1 SV=3 - [TCPD_MOUSE]	P80315	8	13	14.84	28.39	1.058	0.963	4.1	2.1
340	Tropomodulin-2 OS=Mus musculus GN=Tmod2 PE=1 SV=2 - [TMOD2_MOUSE]	Q9JKK7	12	14	37.32	42.17	1.013	0.964	4	3.3
341	Protein FAM126B OS=Mus musculus GN=Fam126b PE=2 SV=1 - [F126B_MOUSE]	Q8C729	2	7	5.09	14.53	1.026	0.964	11.5	3.3
342	Guanine nucleotide-binding protein subunit alpha-11 OS=Mus musculus GN=Gna11 PE=1 SV=1 - [GNA11_MOUSE]	P21278	16	17	39	39.83	0.934	0.964	1.8	2.4
343	Synaptobrevin homolog YKT6 OS=Mus musculus GN=Ykt6 PE=2 SV=1 - [YKT6_MOUSE]	Q9CQW1	3	6	13.64	29.8	1.026	0.964	1.5	2.9
344	MAGUK p55 subfamily member 2 OS=Mus musculus GN=Mpp2 PE=1 SV=1 - [MPP2_MOUSE]	Q9WV34	16	22	30.25	40.94	1.001	0.964	1.7	1.7
345	Septin-11 OS=Mus musculus GN=Sept11 PE=1 SV=4 - [SEP11_MOUSE]	Q8C1B7	17	24	32.48	42.46	1.096	0.964	2.4	4.2
346	Beta-centractin OS=Mus musculus GN=Actr1b PE=1 SV=1 - [ACTY_MOUSE]	Q8R5C5	7	8	16.49	31.12	1.006	0.964	4.4	0.2
347	OCIA domain-containing protein 2 OS=Mus musculus GN=Ociad2 PE=1 SV=1 - [OCAD2_MOUSE]	Q9D8W7	5	3	29.87	20.78	1.006	0.965	7.3	6.8
348	Glyceraldehyde-3-phosphate dehydrogenase OS=Mus musculus GN=Gapdh PE=1 SV=2 - [G3P_MOUSE]	P16858	31	28	72.67	73.87	0.986	0.965	0.8	1.3
349	Proteasome subunit alpha type-2 OS=Mus musculus GN=Psma2 PE=1 SV=3 - [PSA2_MOUSE]	P49722	3	6	14.53	40.6	1.051	0.965	7	3.5
350	Protein NDRG1 OS=Mus musculus GN=Ndrg1 PE=1 SV=1 - [NDRG1_MOUSE]	Q62433	5	5	14.21	21.57	0.977	0.966	2.3	2
351	Rho GTPase-activating protein 1 OS=Mus musculus GN=Arhgap1 PE=1 SV=1 - [RHG01_MOUSE]	Q5FWK3	5	5	11.62	10.71	1.055	0.966	0.5	5.2
352	Choline transporter-like protein 1 OS=Mus musculus GN=Slc44a1 PE=1 SV=3 - [CTL1_MOUSE]	Q6X893	3	7	5.21	12.4	0.983	0.966	8.3	4.8
353	Mitogen-activated protein kinase 1 OS=Mus musculus GN=Mapk1 PE=1 SV=3 - [MK01_MOUSE]	P63085	11	13	30.45	31.01	1.021	0.966	2.2	5.3
354	Endophilin-B2 OS=Mus musculus GN=Sh3glb2 PE=2 SV=2 - [SHLB2_MOUSE]	Q8R3V5	5	9	9.25	20.75	0.93	0.966	1.1	4.4
355	Transforming protein RhoA OS=Mus musculus GN=Rhoa PE=1 SV=1 - [RHOA_MOUSE]	Q9QUI0	6	5	27.46	25.39	1.046	0.967	4.3	6.6
356	Serine/threonine-protein phosphatase 2A 55 kDa regulatory subunit B alpha isoform OS=Mus musculus GN=Ppp2r2a PE=1 SV=1 - [2ABA_MOUSE]	Q6P1F6	6	8	14.54	22.6	0.999	0.967	1.8	5.1
357	Sorbin and SH3 domain-containing protein 2 OS=Mus musculus GN=Sorbs2 PE=1 SV=2 - [SRBS2_MOUSE]	Q3UTJ2	3	4	2.8	2.88	1.099	0.967	4.9	0.8
358	AP-2 complex subunit alpha-2 OS=Mus musculus GN=Ap2a2 PE=1 SV=2 - [AP2A2_MOUSE]	P17427	39	46	41.26	50.53	1.072	0.967	3.5	0.5
359	WD repeat-containing protein 1 OS=Mus musculus GN=Wdr1 PE=1 SV=3 - [WDR1_MOUSE]	O88342	12	17	21.62	27.39	1.008	0.967	2.1	1.7
360	Carboxypeptidase E OS=Mus musculus GN=Cpe PE=1 SV=2 - [CBPE_MOUSE]	Q00493	11	14	23.32	30.25	1.065	0.967	2.7	2
361	Secretory carrier-associated membrane protein 4 OS=Mus musculus GN=Scamp4 PE=2 SV=1 - [SCAM4_MOUSE]	Q9JKV5	2	2	8.26	8.26	0.923	0.967	5.2	0.7
362	Adenylate kinase isoenzyme 1 OS=Mus musculus GN=Ak1 PE=1 SV=1 - [KAD1_MOUSE]	Q9R0Y5	9	8	42.78	41.75	1.015	0.967	5.8	1.4
363	Protein FAM49B OS=Mus musculus GN=Fam49b PE=2 SV=1 - [FA49B_MOUSE]	Q921M7	6	13	19.75	44.14	0.974	0.968	1.9	4.9
364	Alcohol dehydrogenase [NADP(+)] OS=Mus musculus GN=Akr1a1 PE=1 SV=3 - [AK1A1_MOUSE]	Q9JII6	7	14	23.69	41.54	0.998	0.969	3.1	3.4
365	Serine/threonine-protein phosphatase 2A 56 kDa regulatory subunit gamma isoform OS=Mus musculus GN=Ppp2r5c PE=1 SV=2 - [2A5G_MOUSE]	Q60996	6	7	9.35	12.6	1.082	0.969	5.6	2.5
366	Protein lin-7 homolog C OS=Mus musculus GN=Lin7c PE=1 SV=2 - [LIN7C_MOUSE]	O88952	9	7	31.98	26.4	1.038	0.97	9.8	4.5
367	Receptor-type tyrosine-protein phosphatase N2 OS=Mus musculus GN=Ptprn2 PE=1 SV=2 - [PTPR2_MOUSE]	P80560	4	5	3.7	5.99	1.064	0.97	4.3	7.4
368	Cytosolic acyl coenzyme A thioester hydrolase OS=Mus musculus GN=Acot7 PE=1 SV=2 - [BACH_MOUSE]	Q91V12	5	10	17.32	26.77	1.023	0.97	1.1	0.7
369	Lactoylglutathione lyase OS=Mus musculus GN=Glo1 PE=1 SV=3 - [LGUL_MOUSE]	Q9CPU0	6	8	17.93	32.61	0.953	0.97	1.9	3.4
370	Acyl-CoA-binding protein OS=Mus musculus GN=Dbi PE=1 SV=2 - [ACBP_MOUSE]	P31786	9	12	68.97	78.16	0.761	0.97	4.8	0.4
371	Disks large homolog 3 OS=Mus musculus GN=Dlg3 PE=1 SV=1 - [DLG3_MOUSE]	P70175	7	20	6.95	24.03	1.004	0.971	4.9	3.3
372	Paralemmin-1 OS=Mus musculus GN=Palm PE=1 SV=1 - [PALM_MOUSE]	Q9Z0P4	18	24	35.25	56.14	0.826	0.971	3	1.4
373	Liprin-alpha-3 OS=Mus musculus GN=Ppfia3 PE=1 SV=1 - [LIPA3_MOUSE]	P60469	7	12	5.47	10.55	0.986	0.971	5.4	4.2
374	60S ribosomal protein L27 OS=Mus musculus GN=Rpl27 PE=1 SV=2 - [RL27_MOUSE]	P61358	7	8	52.94	58.82	1.027	0.971	4.3	3.3
375	Synaptic vesicle glycoprotein 2B OS=Mus musculus GN=Sv2b PE=1 SV=1 - [SV2B_MOUSE]	Q8BG39	12	16	14.93	23.87	1.026	0.971	3.9	1.6
376	Cell division control protein 42 homolog OS=Mus musculus GN=Cdc42 PE=1 SV=2 - [CDC42_MOUSE]	P60766	4	5	26.7	25.65	0.92	0.971	5.4	2.8
377	Protein KIAA1045 OS=Mus musculus GN=Kiaa1045 PE=2 SV=2 - [K1045_MOUSE]	Q80TL4	6	7	13	13.75	1.013	0.971	4.3	3.3
378	Sodium/potassium-transporting ATPase subunit beta-1 OS=Mus musculus GN=Atp1b1 PE=1 SV=1 - [AT1B1_MOUSE]	P14094	17	21	40.46	36.51	0.917	0.971	0.7	2.1
379	SH3-containing GRB2-like protein 3-interacting protein 1 OS=Mus musculus GN=Sgip1 PE=1 SV=1 - [SGIP1_MOUSE]	Q8VD37	7	14	9.68	21.46	1.013	0.972	3.6	1.3
380	Sodium/potassium-transporting ATPase subunit alpha-3 OS=Mus musculus GN=Atp1a3 PE=1 SV=1 - [AT1A3_MOUSE]	Q6PIC6	62	59	50.84	50.94	0.907	0.972	1.5	0.7
381	6-phosphogluconate dehydrogenase, decarboxylating OS=Mus musculus GN=Pgd PE=2 SV=3 - [6PGD_MOUSE]	Q9DCD0	4	7	9.11	12.22	0.991	0.972	1.9	0.9
382	Destrin OS=Mus musculus GN=Dstn PE=1 SV=3 - [DEST_MOUSE]	Q9R0P5	4	4	24.85	29.09	0.833	0.972	4.9	6
383	Catenin beta-1 OS=Mus musculus GN=Ctnnb1 PE=1 SV=1 - [CTNB1_MOUSE]	Q02248	23	24	33.03	33.67	1.043	0.972	2.6	1.1
384	Elongation factor 1-alpha 1 OS=Mus musculus GN=Eef1a1 PE=1 SV=3 - [EF1A1_MOUSE]	P10126	20	23	35.28	38.1	0.916	0.973	3.9	1.6
385	Membrane-associated progesterone receptor component 2 OS=Mus musculus GN=Pgrmc2 PE=1 SV=2 - [PGRC2_MOUSE]	Q80UU9	4	4	16.59	16.59	0.998	0.973	1.8	4.7
386	ATP-sensitive inward rectifier potassium channel 10 OS=Mus musculus GN=Kcnj10 PE=1 SV=1 - [IRK10_MOUSE]	Q9JM63	2	4	8.71	11.35	0.957	0.973	2.3	1.5
387	Alpha-enolase OS=Mus musculus GN=Eno1 PE=1 SV=3 - [ENOA_MOUSE]	P17182	32	31	71.89	67.05	1.026	0.973	0.7	0.4
388	Dihydropyrimidinase-related protein 2 OS=Mus musculus GN=Dpysl2 PE=1 SV=2 - [DPYL2_MOUSE]	O08553	38	35	69.58	69.76	1.028	0.973	0.4	0.7
389	Serine/threonine-protein phosphatase 2B catalytic subunit beta isoform OS=Mus musculus GN=Ppp3cb PE=1 SV=2 - [PP2BB_MOUSE]	P48453	15	15	27.62	29.33	1.018	0.974	4.9	2
390	Mitochondrial fission 1 protein OS=Mus musculus GN=Fis1 PE=1 SV=1 - [FIS1_MOUSE]	Q9CQ92	2	3	15.79	24.34	0.706	0.974	2.5	1.1
391	Serotransferrin OS=Mus musculus GN=Tf PE=1 SV=1 - [TRFE_MOUSE]	Q921I1	5	4	6.74	5.45	1.023	0.974	2.6	6.2
392	Sodium/potassium-transporting ATPase subunit alpha-1 OS=Mus musculus GN=Atp1a1 PE=1 SV=1 - [AT1A1_MOUSE]	Q8VDN2	53	56	50.34	47.7	0.914	0.974	0.7	0.6
393	Pyridoxal phosphate phosphatase OS=Mus musculus GN=Pdxp PE=1 SV=1 - [PLPP_MOUSE]	P60487	6	6	22.95	27.4	1.01	0.975	2.6	8.8
394	Ribonuclease UK114 OS=Mus musculus GN=Hrsp12 PE=1 SV=3 - [UK114_MOUSE]	P52760	4	5	35.56	36.3	0.972	0.975	6.3	2.6
395	Coronin-1C OS=Mus musculus GN=Coro1c PE=1 SV=2 - [COR1C_MOUSE]	Q9WUM4	4	5	7.17	8.65	1.092	0.976	0.9	0.8
396	Dihydropteridine reductase OS=Mus musculus GN=Qdpr PE=1 SV=2 - [DHPR_MOUSE]	Q8BVI4	7	9	34.44	34.44	0.913	0.976	2	0.7
397	Gamma-aminobutyric acid receptor subunit beta-3 OS=Mus musculus GN=Gabrb3 PE=2 SV=1 - [GBRB3_MOUSE]	P63080	6	10	14.38	22.62	0.952	0.976	3.3	15.3
398	Copine-6 OS=Mus musculus GN=Cpne6 PE=2 SV=1 - [CPNE6_MOUSE]	Q9Z140	16	19	28.19	30.52	1.048	0.976	0.8	2
399	Neudesin OS=Mus musculus GN=Nenf PE=1 SV=1 - [NENF_MOUSE]	Q9CQ45	3	6	22.22	32.75	0.956	0.977	3.1	0.4
400	Calcineurin B homologous protein 1 OS=Mus musculus GN=Chp1 PE=1 SV=2 - [CHP1_MOUSE]	P61022	3	4	20	28.72	0.908	0.977	5.2	1.5
401	BTB/POZ domain-containing protein KCTD12 OS=Mus musculus GN=Kctd12 PE=1 SV=1 - [KCD12_MOUSE]	Q6WVG3	7	10	24.16	33.33	0.997	0.977	1.7	1.1
402	Leucine-rich glioma-inactivated protein 1 OS=Mus musculus GN=Lgi1 PE=1 SV=1 - [LGI1_MOUSE]	Q9JIA1	15	14	26.57	24.6	0.984	0.977	2.4	2
403	LanC-like protein 2 OS=Mus musculus GN=Lancl2 PE=1 SV=1 - [LANC2_MOUSE]	Q9JJK2	7	8	20.67	23.78	1.079	0.977	2.5	4.1
404	AP-1 complex subunit beta-1 OS=Mus musculus GN=Ap1b1 PE=1 SV=2 - [AP1B1_MOUSE]	O35643	26	29	26.94	31.18	1.088	0.978	0.2	2.2
405	ATP-citrate synthase OS=Mus musculus GN=Acly PE=1 SV=1 - [ACLY_MOUSE]	Q91V92	11	15	10.08	12.56	1.031	0.978	0.2	2.5
406	C-terminal-binding protein 1 OS=Mus musculus GN=Ctbp1 PE=1 SV=2 - [CTBP1_MOUSE]	O88712	8	8	17.46	16.1	1.024	0.979	2.7	2.6
407	GTPase HRas OS=Mus musculus GN=Hras PE=1 SV=2 - [RASH_MOUSE]	Q61411	6	8	35.98	51.32	0.951	0.979	5.3	5.9
408	Ras-related protein Rab-10 OS=Mus musculus GN=Rab10 PE=1 SV=1 - [RAB10_MOUSE]	P61027	12	14	46.5	53.5	0.881	0.979	1.2	1.5
409	Lipid phosphate phosphatase-related protein type 4 OS=Mus musculus GN=Lppr4 PE=2 SV=2 - [LPPR4_MOUSE]	Q7TME0	5	11	8.22	19.19	0.954	0.979	3.1	1.5
410	Tubulin beta-4A chain OS=Mus musculus GN=Tubb4a PE=1 SV=3 - [TBB4A_MOUSE]	Q9D6F9	23	22	54.28	61.71	0.959	0.979	3.3	2.6
411	Septin-9 OS=Mus musculus GN=Sept9 PE=1 SV=1 - [SEPT9_MOUSE]	Q80UG5	12	16	17.5	22.64	1.026	0.979	1.8	0.9
412	Charged multivesicular body protein 1a OS=Mus musculus GN=Chmp1a PE=1 SV=1 - [CHM1A_MOUSE]	Q921W0	4	4	14.8	15.31	0.929	0.98	3.7	1.5
413	Phosphoserine aminotransferase OS=Mus musculus GN=Psat1 PE=1 SV=1 - [SERC_MOUSE]	Q99K85	10	11	26.49	29.46	1.002	0.98	3.1	3.5
414	Myotubularin-related protein 5 OS=Mus musculus GN=Sbf1 PE=1 SV=2 - [MTMR5_MOUSE]	Q6ZPE2	6	9	2.84	5.2	1.068	0.98	2.1	2.4
415	Glyoxalase domain-containing protein 4 OS=Mus musculus GN=Glod4 PE=2 SV=1 - [GLOD4_MOUSE]	Q9CPV4	8	9	35.23	32.89	1.038	0.98	5.6	3.8
416	Band 4.1-like protein 1 OS=Mus musculus GN=Epb41l1 PE=1 SV=2 - [E41L1_MOUSE]	Q9Z2H5	15	20	16.38	21.84	1.046	0.98	1.9	4
417	Dynamin-1 OS=Mus musculus GN=Dnm1 PE=1 SV=2 - [DYN1_MOUSE]	P39053	65	74	65.63	66.44	1.066	0.98	0.8	0.4
418	Guanine nucleotide-binding protein G(i) subunit alpha-1 OS=Mus musculus GN=Gnai1 PE=2 SV=1 - [GNAI1_MOUSE]	B2RSH2	15	18	42.09	47.74	1.006	0.98	1.4	2.5
419	Tumor protein p63-regulated gene 1-like protein OS=Mus musculus GN=Tprg1l PE=1 SV=1 - [TPRGL_MOUSE]	Q9DBS2	6	8	37.97	44.36	1.003	0.98	5.2	2.2
420	RasGAP-activating-like protein 1 OS=Mus musculus GN=Rasal1 PE=2 SV=2 - [RASL1_MOUSE]	Q9Z268	11	14	14.39	18.27	1.047	0.981	1.3	2
421	Fatty acid synthase OS=Mus musculus GN=Fasn PE=1 SV=2 - [FAS_MOUSE]	P19096	18	29	7.39	11.82	0.972	0.981	3.3	0.9
422	Proline-rich transmembrane protein 2 OS=Mus musculus GN=Prrt2 PE=1 SV=1 - [PRRT2_MOUSE]	E9PUL5	7	11	23.7	41.62	0.912	0.981	2.2	0.7
423	ATP-binding cassette sub-family D member 3 OS=Mus musculus GN=Abcd3 PE=1 SV=2 - [ABCD3_MOUSE]	P55096	4	5	5.01	6.53	1.028	0.981	1.1	7.1
424	Cytoplasmic FMR1-interacting protein 1 OS=Mus musculus GN=Cyfip1 PE=1 SV=1 - [CYFP1_MOUSE]	Q7TMB8	17	24	12.05	18.28	1.034	0.981	0.7	3.6
425	Protein rogdi homolog OS=Mus musculus GN=Rogdi PE=2 SV=2 - [ROGDI_MOUSE]	Q3TDK6	3	3	8.01	8.01	0.975	0.982	1.6	1.9
426	Band 4.1-like protein 3 OS=Mus musculus GN=Epb41l3 PE=1 SV=1 - [E41L3_MOUSE]	Q9WV92	27	42	27.56	45.96	0.997	0.982	2.8	1.2
427	Importin subunit beta-1 OS=Mus musculus GN=Kpnb1 PE=1 SV=2 - [IMB1_MOUSE]	P70168	9	11	12.1	15.3	1.048	0.983	4.1	0.8
428	Disintegrin and metalloproteinase domain-containing protein 22 OS=Mus musculus GN=Adam22 PE=1 SV=2 - [ADA22_MOUSE]	Q9R1V6	8	9	9.73	9.18	0.913	0.983	3	1.9
429	CaM kinase-like vesicle-associated protein OS=Mus musculus GN=Camkv PE=1 SV=2 - [CAMKV_MOUSE]	Q3UHL1	12	18	31.05	37.5	1.017	0.983	4.6	0.8
430	Sodium- and chloride-dependent GABA transporter 3 OS=Mus musculus GN=Slc6a11 PE=1 SV=2 - [S6A11_MOUSE]	P31650	12	10	14.67	14.35	0.897	0.984	2.7	2
431	Elongation factor 1-alpha 2 OS=Mus musculus GN=Eef1a2 PE=1 SV=1 - [EF1A2_MOUSE]	P62631	15	17	31.1	33.05	1.005	0.984	1.8	4.5
432	Vacuolar protein sorting-associated protein 45 OS=Mus musculus GN=Vps45 PE=1 SV=1 - [VPS45_MOUSE]	P97390	9	10	12.81	15.44	1.077	0.984	3.9	3.5
433	Beta-adducin OS=Mus musculus GN=Add2 PE=1 SV=4 - [ADDB_MOUSE]	Q9QYB8	8	13	9.38	15.45	1.052	0.984	7.6	2.8
434	Creatine kinase B-type OS=Mus musculus GN=Ckb PE=1 SV=1 - [KCRB_MOUSE]	Q04447	30	29	67.19	68.5	1.005	0.984	0.4	0.5
435	ProSAAS OS=Mus musculus GN=Pcsk1n PE=1 SV=2 - [PCSK1_MOUSE]	Q9QXV0	10	7	36.82	31.01	0.945	0.985	1	1
436	Adenylate cyclase type 9 OS=Mus musculus GN=Adcy9 PE=1 SV=1 - [ADCY9_MOUSE]	P51830	7	11	4.73	7.83	0.979	0.985	8.9	1.6
437	Dihydropyrimidinase-related protein 3 OS=Mus musculus GN=Dpysl3 PE=1 SV=1 - [DPYL3_MOUSE]	Q62188	15	20	31.93	36.67	1.033	0.985	1	6.5
438	Transketolase OS=Mus musculus GN=Tkt PE=1 SV=1 - [TKT_MOUSE]	P40142	20	22	36.44	37.4	0.93	0.985	1.9	1.4
439	Protein FAM131B OS=Mus musculus GN=Fam131b PE=1 SV=1 - [F131B_MOUSE]	Q3TY60	3	3	12.95	8.13	0.928	0.986	0.9	6.5
440	6-phosphofructokinase, liver type OS=Mus musculus GN=Pfkl PE=1 SV=4 - [K6PL_MOUSE]	P12382	19	22	26.15	29.62	1.044	0.986	1.9	3.6
441	OX-2 membrane glycoprotein OS=Mus musculus GN=Cd200 PE=1 SV=1 - [OX2G_MOUSE]	O54901	3	4	11.87	15.83	0.988	0.986	1.5	0.8
442	Inactive dipeptidyl peptidase 10 OS=Mus musculus GN=Dpp10 PE=2 SV=1 - [DPP10_MOUSE]	Q6NXK7	10	17	10.16	19.07	0.973	0.986	1.4	1.5
443	Ras-related protein Rab-21 OS=Mus musculus GN=Rab21 PE=1 SV=4 - [RAB21_MOUSE]	P35282	5	6	20.27	30.18	0.991	0.986	5.4	3
444	Ankyrin-2 OS=Mus musculus GN=Ank2 PE=1 SV=2 - [ANK2_MOUSE]	Q8C8R3	71	89	20.42	24.06	1.008	0.986	1.1	1.1
445	Adapter molecule crk OS=Mus musculus GN=Crk PE=1 SV=1 - [CRK_MOUSE]	Q64010	2	6	5.59	22.7	0.996	0.986	2.6	5.5
446	Ras-related protein Rab-7a OS=Mus musculus GN=Rab7a PE=1 SV=2 - [RAB7A_MOUSE]	P51150	9	14	43.48	64.73	1.004	0.986	2.2	2.9
447	Protein SCAI OS=Mus musculus GN=Scai PE=1 SV=2 - [SCAI_MOUSE]	Q8C8N2	8	15	12.87	24.75	1.049	0.986	2.7	4.5
448	Serine/threonine-protein kinase PAK 1 OS=Mus musculus GN=Pak1 PE=1 SV=1 - [PAK1_MOUSE]	O88643	5	10	10.64	18.72	1.029	0.986	2.9	1.2
449	Neural cell adhesion molecule 1 OS=Mus musculus GN=Ncam1 PE=1 SV=3 - [NCAM1_MOUSE]	P13595	38	51	34.89	43.95	0.914	0.987	0.7	1
450	Syntaxin-1B OS=Mus musculus GN=Stx1b PE=1 SV=1 - [STX1B_MOUSE]	P61264	21	24	62.15	58.33	0.865	0.987	0.7	1.2
451	Putative tyrosine-protein phosphatase auxilin OS=Mus musculus GN=Dnajc6 PE=2 SV=2 - [AUXI_MOUSE]	Q80TZ3	7	12	7.57	12.37	1.117	0.987	4.2	1.4
452	Band 4.1-like protein 2 OS=Mus musculus GN=Epb41l2 PE=1 SV=2 - [E41L2_MOUSE]	O70318	23	29	22.57	29.15	0.915	0.987	1.2	1.9
453	Synaptojanin-1 OS=Mus musculus GN=Synj1 PE=1 SV=3 - [SYNJ1_MOUSE]	Q8CHC4	28	41	20.27	30.81	0.985	0.987	1.2	0.8
454	Voltage-dependent calcium channel subunit alpha-2/delta-1 OS=Mus musculus GN=Cacna2d1 PE=1 SV=1 - [CA2D1_MOUSE]	O08532	11	21	9.97	23.39	0.857	0.988	1.8	1.1
455	Polyadenylate-binding protein 1 OS=Mus musculus GN=Pabpc1 PE=1 SV=2 - [PABP1_MOUSE]	P29341	5	3	8.33	4.4	1.035	0.988	3.1	3.3
456	Cell adhesion molecule 4 OS=Mus musculus GN=Cadm4 PE=1 SV=1 - [CADM4_MOUSE]	Q8R464	6	7	19.07	20.1	0.887	0.988	1.3	0.3
457	Calcium-dependent secretion activator 1 OS=Mus musculus GN=Cadps PE=1 SV=3 - [CAPS1_MOUSE]	Q80TJ1	27	32	22.36	25.31	1.02	0.988	2.4	1.5
458	1-phosphatidylinositol 4,5-bisphosphate phosphodiesterase beta-1 OS=Mus musculus GN=Plcb1 PE=2 SV=2 - [PLCB1_MOUSE]	Q9Z1B3	12	22	8.72	16.69	0.946	0.989	4.1	4
459	Syntaxin-binding protein 5 OS=Mus musculus GN=Stxbp5 PE=1 SV=3 - [STXB5_MOUSE]	Q8K400	6	7	6.08	7.9	0.954	0.989	1	3
460	Microtubule-associated protein 6 OS=Mus musculus GN=Map6 PE=1 SV=2 - [MAP6_MOUSE]	Q7TSJ2	31	46	39.07	56.4	0.98	0.989	1.3	1
461	Argininosuccinate synthase OS=Mus musculus GN=Ass1 PE=1 SV=1 - [ASSY_MOUSE]	P16460	5	10	9.22	18.93	1.031	0.989	1.4	1.3
462	Ras-related protein Rab-3A OS=Mus musculus GN=Rab3a PE=1 SV=1 - [RAB3A_MOUSE]	P63011	17	15	78.64	73.18	0.956	0.989	0.8	1.9
463	Serine/threonine-protein phosphatase 2A 56 kDa regulatory subunit epsilon isoform OS=Mus musculus GN=Ppp2r5e PE=2 SV=3 - [2A5E_MOUSE]	Q61151	4	9	8.57	19.7	0.949	0.989	17.5	6.6
464	Secretory carrier-associated membrane protein 1 OS=Mus musculus GN=Scamp1 PE=1 SV=1 - [SCAM1_MOUSE]	Q8K021	9	10	33.43	35.21	0.994	0.99	2.8	2.6
465	Tyrosine-protein phosphatase non-receptor type 9 OS=Mus musculus GN=Ptpn9 PE=1 SV=2 - [PTN9_MOUSE]	O35239	5	5	6.41	7.08	1.072	0.99	2.5	1
466	Alpha-centractin OS=Mus musculus GN=Actr1a PE=2 SV=1 - [ACTZ_MOUSE]	P61164	8	11	23.14	43.62	1.117	0.99	4.4	6.7
467	Cell adhesion molecule 1 OS=Mus musculus GN=Cadm1 PE=1 SV=2 - [CADM1_MOUSE]	Q8R5M8	4	6	10.09	13.38	0.949	0.99	1.5	5.4
468	Neuronal proto-oncogene tyrosine-protein kinase Src OS=Mus musculus GN=Src PE=1 SV=4 - [SRC_MOUSE]	P05480	12	11	20.15	18.3	0.946	0.991	2.1	6.6
469	Ras-related protein Rab-6B OS=Mus musculus GN=Rab6b PE=1 SV=1 - [RAB6B_MOUSE]	P61294	11	11	50.96	58.17	0.899	0.991	5.8	5.7
470	L-lactate dehydrogenase B chain OS=Mus musculus GN=Ldhb PE=1 SV=2 - [LDHB_MOUSE]	P16125	15	15	45.51	41.32	1.03	0.991	3	0.4
471	Coiled-coil domain-containing protein 177 OS=Mus musculus GN=Ccdc177 PE=1 SV=1 - [CC177_MOUSE]	Q3UHB8	9	7	12.32	9.21	1	0.991	5.3	3.4
472	Dihydropyrimidinase-related protein 4 OS=Mus musculus GN=Dpysl4 PE=1 SV=1 - [DPYL4_MOUSE]	O35098	16	15	38.64	36.36	1	0.991	1.1	1.4
473	F-actin-capping protein subunit beta OS=Mus musculus GN=Capzb PE=1 SV=3 - [CAPZB_MOUSE]	P47757	7	8	23.83	31.77	1.086	0.991	0.5	2.2
474	Coronin-2B OS=Mus musculus GN=Coro2b PE=2 SV=2 - [COR2B_MOUSE]	Q8BH44	7	9	8.75	13.54	1.125	0.992	3.9	3.9
475	ATP-binding cassette sub-family B member 7, mitochondrial OS=Mus musculus GN=Abcb7 PE=1 SV=3 - [ABCB7_MOUSE]	Q61102	7	3	9.18	3.72	1.043	0.992	1.3	7.4
476	Saccharopine dehydrogenase-like oxidoreductase OS=Mus musculus GN=Sccpdh PE=2 SV=1 - [SCPDL_MOUSE]	Q8R127	5	4	19.11	8.86	1.026	0.993	3.2	1
477	Actin-related protein 2 OS=Mus musculus GN=Actr2 PE=1 SV=1 - [ARP2_MOUSE]	P61161	12	13	25.89	34.01	1.005	0.993	1.8	3
478	Sodium channel protein type 9 subunit alpha OS=Mus musculus GN=Scn9a PE=1 SV=2 - [SCN9A_MOUSE]	Q62205	6	8	1.92	3.98	0.924	0.993	13.6	2
479	40S ribosomal protein S25 OS=Mus musculus GN=Rps25 PE=2 SV=1 - [RS25_MOUSE]	P62852	3	3	20.8	22.4	1.128	0.993	3.7	1.1
480	Monoglyceride lipase OS=Mus musculus GN=Mgll PE=1 SV=1 - [MGLL_MOUSE]	O35678	4	10	18.48	42.24	1	0.993	5.5	1.9
481	Catenin alpha-2 OS=Mus musculus GN=Ctnna2 PE=1 SV=3 - [CTNA2_MOUSE]	Q61301	31	39	31.16	44.49	1.043	0.993	2.6	1.3
482	Endoplasmic reticulum resident protein 29 OS=Mus musculus GN=Erp29 PE=1 SV=2 - [ERP29_MOUSE]	P57759	8	5	29.01	15.65	0.989	0.994	0.9	3.7
483	Uncharacterized protein C1orf198 homolog OS=Mus musculus PE=2 SV=1 - [CA198_MOUSE]	Q8C3W1	3	3	9.63	12.42	0.842	0.994	11.5	3.8
484	28S ribosomal protein S36, mitochondrial OS=Mus musculus GN=Mrps36 PE=2 SV=1 - [RT36_MOUSE]	Q9CQX8	4	3	39.22	38.24	1.028	0.994	4.3	12
485	Clathrin heavy chain 1 OS=Mus musculus GN=Cltc PE=1 SV=3 - [CLH1_MOUSE]	Q68FD5	75	81	46.99	49.61	1.028	0.994	0.9	0.5
486	Guanine nucleotide-binding protein G(z) subunit alpha OS=Mus musculus GN=Gnaz PE=2 SV=4 - [GNAZ_MOUSE]	O70443	11	13	31.55	36.34	0.961	0.994	2.7	0.8
487	Guanine nucleotide-binding protein G(i) subunit alpha-2 OS=Mus musculus GN=Gnai2 PE=1 SV=5 - [GNAI2_MOUSE]	P08752	16	18	40.28	47.89	0.961	0.994	1.8	4.5
488	Ketimine reductase mu-crystallin OS=Mus musculus GN=Crym PE=1 SV=1 - [CRYM_MOUSE]	O54983	12	15	39.3	47.28	0.991	0.995	2.6	4
489	Actin-related protein 2/3 complex subunit 3 OS=Mus musculus GN=Arpc3 PE=1 SV=3 - [ARPC3_MOUSE]	Q9JM76	6	4	32.02	21.35	0.917	0.995	3.7	0.8
490	Elongation factor 2 OS=Mus musculus GN=Eef2 PE=1 SV=2 - [EF2_MOUSE]	P58252	10	16	13.29	23.08	1.048	0.995	1.8	3.4
491	Misshapen-like kinase 1 OS=Mus musculus GN=Mink1 PE=1 SV=3 - [MINK1_MOUSE]	Q9JM52	10	15	6.65	11.09	1.03	0.995	5.4	3.4
492	Zinc finger C2HC domain-containing protein 1A OS=Mus musculus GN=Zc2hc1a PE=2 SV=1 - [ZC21A_MOUSE]	Q8BJH1	5	5	16.36	14.81	1.015	0.996	4.9	3.6
493	Regulating synaptic membrane exocytosis protein 1 OS=Mus musculus GN=Rims1 PE=1 SV=2 - [RIMS1_MOUSE]	Q99NE5	9	13	4.51	10.32	0.919	0.996	1.7	4.2
494	Spectrin alpha chain, non-erythrocytic 1 OS=Mus musculus GN=Sptan1 PE=1 SV=4 - [SPTN1_MOUSE]	P16546	181	217	65.53	75.49	1.081	0.996	0.2	0.3
495	Phosphoglucomutase-1 OS=Mus musculus GN=Pgm1 PE=1 SV=4 - [PGM1_MOUSE]	Q9D0F9	9	12	16.37	21.71	1.006	0.997	4.6	2.4
496	Synaptosomal-associated protein 25 OS=Mus musculus GN=Snap25 PE=1 SV=1 - [SNP25_MOUSE]	P60879	19	19	76.7	72.82	0.917	0.997	2.5	0.8
497	Spectrin beta chain, non-erythrocytic 1 OS=Mus musculus GN=Sptbn1 PE=1 SV=2 - [SPTB2_MOUSE]	Q62261	146	159	59.63	63.01	1.062	0.997	1.3	1
498	Glyoxylate reductase/hydroxypyruvate reductase OS=Mus musculus GN=Grhpr PE=1 SV=1 - [GRHPR_MOUSE]	Q91Z53	3	3	9.76	8.84	0.982	0.997	4.5	2.1
499	Guanine nucleotide-binding protein G(q) subunit alpha OS=Mus musculus GN=Gnaq PE=1 SV=4 - [GNAQ_MOUSE]	P21279	23	25	52.37	52.37	0.985	0.997	1.9	2.1
500	Plectin OS=Mus musculus GN=Plec PE=1 SV=2 - [PLEC_MOUSE]	Q9QXS1	42	83	9.53	18.14	1.018	0.997	1.6	0.5
501	Plexin-A4 OS=Mus musculus GN=Plxna4 PE=1 SV=3 - [PLXA4_MOUSE]	Q80UG2	10	20	4.81	10.72	0.922	0.997	5.5	3.5
502	Ras-related protein Rab-14 OS=Mus musculus GN=Rab14 PE=1 SV=3 - [RAB14_MOUSE]	Q91V41	13	16	59.07	67.91	0.994	0.997	1.1	2.4
503	Platelet-activating factor acetylhydrolase IB subunit alpha OS=Mus musculus GN=Pafah1b1 PE=1 SV=2 - [LIS1_MOUSE]	P63005	6	7	15.12	17.8	0.97	0.998	5.3	4.9
504	Latrophilin-1 OS=Mus musculus GN=Lphn1 PE=1 SV=2 - [LPHN1_MOUSE]	Q80TR1	6	6	4.23	3.62	0.893	0.998	3.7	1.9
505	cAMP-dependent protein kinase type II-alpha regulatory subunit OS=Mus musculus GN=Prkar2a PE=1 SV=2 - [KAP2_MOUSE]	P12367	10	12	27.68	35.91	1.007	0.998	3.3	0.3
506	GTP-binding nuclear protein Ran OS=Mus musculus GN=Ran PE=1 SV=3 - [RAN_MOUSE]	P62827	5	6	24.54	26.39	1.065	0.998	3	3
507	Serine/threonine-protein phosphatase 5 OS=Mus musculus GN=Ppp5c PE=1 SV=3 - [PPP5_MOUSE]	Q60676	2	5	4.01	12.02	0.96	0.998	5.2	3.1
508	Teneurin-3 OS=Mus musculus GN=Tenm3 PE=1 SV=1 - [TEN3_MOUSE]	Q9WTS6	3	3	0.7	0.7	0.88	0.999	3	2.9
509	Gamma-aminobutyric acid type B receptor subunit 2 OS=Mus musculus GN=Gabbr2 PE=1 SV=2 - [GABR2_MOUSE]	Q80T41	3	9	2.98	9.15	0.932	0.999	5.8	5.1
510	Ras-related protein Rab-15 OS=Mus musculus GN=Rab15 PE=1 SV=1 - [RAB15_MOUSE]	Q8K386	4	4	21.23	21.23	0.902	0.999	2	1.1
511	60S ribosomal protein L34 OS=Mus musculus GN=Rpl34 PE=3 SV=2 - [RL34_MOUSE]	Q9D1R9	3	4	18.8	26.5	1.057	0.999	0.7	0.6
512	Protein shisa-6 homolog OS=Mus musculus GN=Shisa6 PE=1 SV=1 - [SHSA6_MOUSE]	Q3UH99	6	7	13.33	14.67	0.982	1	2.5	2.2
513	AP-2 complex subunit mu OS=Mus musculus GN=Ap2m1 PE=1 SV=1 - [AP2M1_MOUSE]	P84091	27	24	47.82	45.75	1.032	1	3.4	0.4
514	AP-3 complex subunit delta-1 OS=Mus musculus GN=Ap3d1 PE=1 SV=1 - [AP3D1_MOUSE]	O54774	3	2	3.17	3.09	1.056	1	5.8	2.6
515	Septin-6 OS=Mus musculus GN=Sept6 PE=1 SV=4 - [SEPT6_MOUSE]	Q9R1T4	14	20	23.27	36.41	1.024	1	2	2.4
516	Contactin-2 OS=Mus musculus GN=Cntn2 PE=1 SV=2 - [CNTN2_MOUSE]	Q61330	3	7	2.31	7.69	0.923	1		1
517	Alpha-2-macroglobulin receptor-associated protein OS=Mus musculus GN=Lrpap1 PE=1 SV=1 - [AMRP_MOUSE]	P55302	2	12	5	31.67	0.944	1.001	3.8	2.6
518	Noelin OS=Mus musculus GN=Olfm1 PE=1 SV=1 - [NOE1_MOUSE]	O88998	6	8	9.48	15.88	1.014	1.001	4	6.1
519	GTP-binding protein Di-Ras2 OS=Mus musculus GN=Diras2 PE=2 SV=1 - [DIRA2_MOUSE]	Q5PR73	6	7	29.15	35.18	0.971	1.001	2.5	1.8
520	Aflatoxin B1 aldehyde reductase member 2 OS=Mus musculus GN=Akr7a2 PE=1 SV=3 - [ARK72_MOUSE]	Q8CG76	2	3	5.45	9.54	1.026	1.001	10.7	0.6
521	Synaptic vesicle glycoprotein 2A OS=Mus musculus GN=Sv2a PE=1 SV=1 - [SV2A_MOUSE]	Q9JIS5	19	25	20.49	27.63	0.997	1.001	2.2	2.1
522	Hepatocyte cell adhesion molecule OS=Mus musculus GN=Hepacam PE=1 SV=2 - [HECAM_MOUSE]	Q640R3	7	13	18.66	34.69	0.958	1.001	4.6	4.6
523	WD repeat-containing protein 37 OS=Mus musculus GN=Wdr37 PE=2 SV=1 - [WDR37_MOUSE]	Q8CBE3	7	10	13.51	16.94	0.976	1.002	3.8	3.4
524	NADPH--cytochrome P450 reductase OS=Mus musculus GN=Por PE=1 SV=2 - [NCPR_MOUSE]	P37040	9	11	12.68	17.7	1.058	1.002	7.2	2.6
525	Abhydrolase domain-containing protein 16A OS=Mus musculus GN=Abhd16a PE=1 SV=3 - [ABHGA_MOUSE]	Q9Z1Q2	3	3	6.27	6.45	1.004	1.002		1.4
526	Neurocan core protein OS=Mus musculus GN=Ncan PE=2 SV=1 - [NCAN_MOUSE]	P55066	10	8	5.91	4.89	0.884	1.003	3.6	2
527	Cytochrome c oxidase subunit 7A2, mitochondrial OS=Mus musculus GN=Cox7a2 PE=1 SV=2 - [CX7A2_MOUSE]	P48771	4	3	59.04	38.55	0.692	1.003	9.4	2.9
528	Disintegrin and metalloproteinase domain-containing protein 23 OS=Mus musculus GN=Adam23 PE=1 SV=1 - [ADA23_MOUSE]	Q9R1V7	7	9	5.91	8.56	0.947	1.003	4.8	1.6
529	Ornithine aminotransferase, mitochondrial OS=Mus musculus GN=Oat PE=1 SV=1 - [OAT_MOUSE]	P29758	9	7	25.06	14.35	1.147	1.004	2.8	13.7
530	Latexin OS=Mus musculus GN=Lxn PE=1 SV=2 - [LXN_MOUSE]	P70202	2	3	12.16	12.16	0.971	1.004	0.9	0.8
531	Atlastin-1 OS=Mus musculus GN=Atl1 PE=1 SV=1 - [ATLA1_MOUSE]	Q8BH66	10	13	21.51	26.52	1.031	1.005	5.4	0.6
532	Ras-related protein Rab-35 OS=Mus musculus GN=Rab35 PE=1 SV=1 - [RAB35_MOUSE]	Q6PHN9	9	12	33.33	47.26	0.844	1.005	2.5	1.6
533	DNA damage-binding protein 1 OS=Mus musculus GN=Ddb1 PE=1 SV=2 - [DDB1_MOUSE]	Q3U1J4	2	3	1.4	2.28	1.243	1.005	24.1	2.4
534	Dihydropyrimidinase-related protein 5 OS=Mus musculus GN=Dpysl5 PE=1 SV=1 - [DPYL5_MOUSE]	Q9EQF6	10	12	18.79	21.1	0.984	1.005	0.4	2.8
535	Neutral cholesterol ester hydrolase 1 OS=Mus musculus GN=Nceh1 PE=1 SV=1 - [NCEH1_MOUSE]	Q8BLF1	5	10	18.63	29.41	0.983	1.005	4.7	4.8
536	Cytoplasmic dynein 1 heavy chain 1 OS=Mus musculus GN=Dync1h1 PE=1 SV=2 - [DYHC1_MOUSE]	Q9JHU4	69	110	15.65	26.25	1.029	1.005	1.2	0.9
537	Tyrosine-protein phosphatase non-receptor type substrate 1 OS=Mus musculus GN=Sirpa PE=1 SV=1 - [SHPS1_MOUSE]	P97797	4	13	7.6	28.65	0.955	1.005	4.7	2.2
538	Homer protein homolog 1 OS=Mus musculus GN=Homer1 PE=1 SV=2 - [HOME1_MOUSE]	Q9Z2Y3	11	20	28.14	51.09	1.042	1.005	3.4	1.4
539	Heat shock cognate 71 kDa protein OS=Mus musculus GN=Hspa8 PE=1 SV=1 - [HSP7C_MOUSE]	P63017	37	40	47.83	57.74	0.999	1.005	1.4	1.2
540	Drebrin OS=Mus musculus GN=Dbn1 PE=1 SV=4 - [DREB_MOUSE]	Q9QXS6	2	6	3.4	9.63	0.905	1.005	11.9	3.4
541	Ras-related protein Rab-8B OS=Mus musculus GN=Rab8b PE=1 SV=1 - [RAB8B_MOUSE]	P61028	9	11	35.75	42.03	0.927	1.005	0.7	2.9
542	Putative adenosylhomocysteinase 2 OS=Mus musculus GN=Ahcyl1 PE=1 SV=1 - [SAHH2_MOUSE]	Q80SW1	12	20	21.7	30	1.05	1.006	5	0.5
543	Rho GTPase-activating protein 39 OS=Mus musculus GN=Arhgap39 PE=1 SV=2 - [RHG39_MOUSE]	P59281	5	6	4.07	5.15	0.901	1.006	2.1	3.6
544	Tetraspanin-7 OS=Mus musculus GN=Tspan7 PE=2 SV=2 - [TSN7_MOUSE]	Q62283	4	5	14.86	16.47	0.959	1.006	1.3	4.3
545	Gap junction alpha-1 protein OS=Mus musculus GN=Gja1 PE=1 SV=2 - [CXA1_MOUSE]	P23242	9	13	21.73	26.18	1.013	1.006	2.8	6.9
546	Cytochrome b5 type B OS=Mus musculus GN=Cyb5b PE=1 SV=1 - [CYB5B_MOUSE]	Q9CQX2	7	7	59.59	54.11	0.993	1.006	6.1	3.5
547	Dihydropyrimidinase-related protein 1 OS=Mus musculus GN=Crmp1 PE=1 SV=1 - [DPYL1_MOUSE]	P97427	23	25	46.15	45.28	0.993	1.006	0.7	3.3
548	Isocitrate dehydrogenase [NADP] cytoplasmic OS=Mus musculus GN=Idh1 PE=1 SV=2 - [IDHC_MOUSE]	O88844	11	13	20.77	22.46	1.038	1.006	1.7	1.2
549	Alcohol dehydrogenase class-3 OS=Mus musculus GN=Adh5 PE=1 SV=3 - [ADHX_MOUSE]	P28474	4	6	8.29	12.03	0.949	1.006	2	3.3
550	Ras-related protein Rab-1B OS=Mus musculus GN=Rab1b PE=1 SV=1 - [RAB1B_MOUSE]	Q9D1G1	12	12	54.73	53.23	0.856	1.007	7.4	4.5
551	Synaptoporin OS=Mus musculus GN=Synpr PE=1 SV=1 - [SYNPR_MOUSE]	Q8BGN8	3	5	7.55	37.36	0.979	1.007	7.3	3.4
552	FERM, RhoGEF and pleckstrin domain-containing protein 1 OS=Mus musculus GN=Farp1 PE=1 SV=1 - [FARP1_MOUSE]	F8VPU2	6	9	5.53	8.21	0.947	1.007	9.9	2.1
553	ADP-ribosylation factor 6 OS=Mus musculus GN=Arf6 PE=1 SV=2 - [ARF6_MOUSE]	P62331	5	6	27.43	27.43	0.999	1.007	2.3	4.7
554	Actin, cytoplasmic 1 OS=Mus musculus GN=Actb PE=1 SV=1 - [ACTB_MOUSE]	P60710	32	26	73.33	65.33	1.043	1.007	0.4	1
555	Cell adhesion molecule 2 OS=Mus musculus GN=Cadm2 PE=1 SV=2 - [CADM2_MOUSE]	Q8BLQ9	10	11	15.4	22.76	0.946	1.008	4.3	7.3
556	Metaxin-2 OS=Mus musculus GN=Mtx2 PE=1 SV=1 - [MTX2_MOUSE]	O88441	5	2	20.91	6.84	1.006	1.008	4.2	2.8
557	Neuronal growth regulator 1 OS=Mus musculus GN=Negr1 PE=1 SV=1 - [NEGR1_MOUSE]	Q80Z24	7	5	25.57	17.82	1.026	1.008	6.8	1
558	Casein kinase II subunit alpha OS=Mus musculus GN=Csnk2a1 PE=1 SV=2 - [CSK21_MOUSE]	Q60737	10	9	40.92	35.55	1.053	1.008	1.9	5
559	Ubiquitin carboxyl-terminal hydrolase 5 OS=Mus musculus GN=Usp5 PE=1 SV=1 - [UBP5_MOUSE]	P56399	11	14	12.24	18.41	1.009	1.009	1.2	6.3
560	Phytanoyl-CoA hydroxylase-interacting protein OS=Mus musculus GN=Phyhip PE=1 SV=1 - [PHYIP_MOUSE]	Q8K0S0	6	7	14.55	20	1.021	1.009	17.7	2.9
561	39S ribosomal protein L12, mitochondrial OS=Mus musculus GN=Mrpl12 PE=1 SV=2 - [RM12_MOUSE]	Q9DB15	4	3	20.9	24.88	0.878	1.009	1.8	4.6
562	Guanine nucleotide-binding protein subunit alpha-13 OS=Mus musculus GN=Gna13 PE=1 SV=1 - [GNA13_MOUSE]	P27601	13	15	35.81	40.05	0.943	1.009	1.5	1.8
563	Sodium/calcium exchanger 1 OS=Mus musculus GN=Slc8a1 PE=1 SV=1 - [NAC1_MOUSE]	P70414	14	18	10.93	13.61	0.925	1.01	4.5	0.7
564	Solute carrier family 2, facilitated glucose transporter member 1 OS=Mus musculus GN=Slc2a1 PE=1 SV=4 - [GTR1_MOUSE]	P17809	6	5	11.99	6.5	1.222	1.01	1.8	1.3
565	Gamma-aminobutyric acid type B receptor subunit 1 OS=Mus musculus GN=Gabbr1 PE=1 SV=1 - [GABR1_MOUSE]	Q9WV18	5	6	4.9	4.69	0.904	1.01	2.1	4.6
566	ATP synthase subunit delta, mitochondrial OS=Mus musculus GN=Atp5d PE=1 SV=1 - [ATPD_MOUSE]	Q9D3D9	7	5	44.05	44.05	0.884	1.011	1.7	1.5
567	Oxidation resistance protein 1 OS=Mus musculus GN=Oxr1 PE=2 SV=3 - [OXR1_MOUSE]	Q4KMM3	11	25	15.13	32.91	0.908	1.011	2.3	1.4
568	Gephyrin OS=Mus musculus GN=Gphn PE=1 SV=2 - [GEPH_MOUSE]	Q8BUV3	7	9	9.62	12.09	1.078	1.011	0.8	4
569	NADH dehydrogenase [ubiquinone] 1 beta subcomplex subunit 6 OS=Mus musculus GN=Ndufb6 PE=1 SV=3 - [NDUB6_MOUSE]	Q3UIU2	4	4	36.72	32.81	1.057	1.011	2.6	2.1
570	Rap guanine nucleotide exchange factor 4 OS=Mus musculus GN=Rapgef4 PE=1 SV=1 - [RPGF4_MOUSE]	Q9EQZ6	15	12	15.92	10.29	1.064	1.012	1.6	3.4
571	Protein EFR3 homolog B OS=Mus musculus GN=Efr3b PE=2 SV=2 - [EFR3B_MOUSE]	Q6ZQ18	5	5	6.24	6.36	0.902	1.012	5.8	3.4
572	Heat shock-related 70 kDa protein 2 OS=Mus musculus GN=Hspa2 PE=1 SV=2 - [HSP72_MOUSE]	P17156	20	23	25.75	36.49	0.95	1.012	1.9	11.2
573	Activator of 90 kDa heat shock protein ATPase homolog 1 OS=Mus musculus GN=Ahsa1 PE=2 SV=2 - [AHSA1_MOUSE]	Q8BK64	2	4	5.92	14.79	0.989	1.012	1.1	5
574	Stromal membrane-associated protein 1 OS=Mus musculus GN=Smap1 PE=1 SV=1 - [SMAP1_MOUSE]	Q91VZ6	3	4	8.18	10.23	1.097	1.012	2	3.1
575	Flotillin-1 OS=Mus musculus GN=Flot1 PE=1 SV=1 - [FLOT1_MOUSE]	O08917	16	19	32.94	46.5	1.047	1.013	4.7	3.3
576	Alpha-adducin OS=Mus musculus GN=Add1 PE=1 SV=2 - [ADDA_MOUSE]	Q9QYC0	14	21	20.68	29.25	0.981	1.013	2.7	0.6
577	ATP synthase subunit e, mitochondrial OS=Mus musculus GN=Atp5i PE=1 SV=2 - [ATP5I_MOUSE]	Q06185	11	6	85.92	67.61	0.786	1.013	2.7	2.2
578	Glutathione S-transferase A4 OS=Mus musculus GN=Gsta4 PE=1 SV=3 - [GSTA4_MOUSE]	P24472	5	4	22.07	18.92	0.933	1.013	1.7	3.3
579	DmX-like protein 2 OS=Mus musculus GN=Dmxl2 PE=1 SV=3 - [DMXL2_MOUSE]	Q8BPN8	23	43	7.98	14.31	1.015	1.013	1.9	0.6
580	Microtubule-associated protein RP/EB family member 3 OS=Mus musculus GN=Mapre3 PE=1 SV=1 - [MARE3_MOUSE]	Q6PER3	8	12	25.62	30.96	1.034	1.014	3.4	4
581	Tubulin beta-3 chain OS=Mus musculus GN=Tubb3 PE=1 SV=1 - [TBB3_MOUSE]	Q9ERD7	23	21	52.22	52.67	1.007	1.014	2.7	4.2
582	Cyclin-dependent kinase 5 OS=Mus musculus GN=Cdk5 PE=1 SV=1 - [CDK5_MOUSE]	P49615	6	6	24.66	23.97	1.095	1.014	3.2	0.9
583	Glypican-1 OS=Mus musculus GN=Gpc1 PE=1 SV=1 - [GPC1_MOUSE]	Q9QZF2	6	7	16.16	20.11	0.923	1.015	6.3	3.6
584	Mitogen-activated protein kinase 10 OS=Mus musculus GN=Mapk10 PE=1 SV=2 - [MK10_MOUSE]	Q61831	4	5	6.25	9.05	1.041	1.015	17.5	3.2
585	6-phosphofructokinase type C OS=Mus musculus GN=Pfkp PE=1 SV=1 - [K6PP_MOUSE]	Q9WUA3	14	20	16.33	24.23	0.974	1.016	1.3	1.7
586	Vacuolar protein sorting-associated protein 29 OS=Mus musculus GN=Vps29 PE=1 SV=1 - [VPS29_MOUSE]	Q9QZ88	3	5	17.03	28.02	1.006	1.016	5.9	7.9
587	WD repeat-containing protein 7 OS=Mus musculus GN=Wdr7 PE=1 SV=3 - [WDR7_MOUSE]	Q920I9	11	19	6.45	13.1	1.047	1.016	3.5	0.9
588	Secretory carrier-associated membrane protein 5 OS=Mus musculus GN=Scamp5 PE=2 SV=1 - [SCAM5_MOUSE]	Q9JKD3	3	3	11.91	11.91	0.936	1.016	0.4	2
589	Leukocyte surface antigen CD47 OS=Mus musculus GN=Cd47 PE=1 SV=2 - [CD47_MOUSE]	Q61735	3	6	10.89	18.48	0.924	1.016	7.5	2.3
590	Ras-related protein Rab-1A OS=Mus musculus GN=Rab1A PE=1 SV=3 - [RAB1A_MOUSE]	P62821	14	15	60.49	68.78	0.934	1.016	1	3.3
591	Proline-rich transmembrane protein 3 OS=Mus musculus GN=Prrt3 PE=1 SV=1 - [PRRT3_MOUSE]	Q6PE13	2	3	1.44	2.88	1.012	1.017		4.3
592	40S ribosomal protein S3 OS=Mus musculus GN=Rps3 PE=1 SV=1 - [RS3_MOUSE]	P62908	7	7	34.57	31.69	1.008	1.017	3.2	1.6
593	Talin-2 OS=Mus musculus GN=Tln2 PE=1 SV=3 - [TLN2_MOUSE]	Q71LX4	10	11	3.71	4.17	1.047	1.017	4.6	2.3
594	Catenin delta-2 OS=Mus musculus GN=Ctnnd2 PE=1 SV=1 - [CTND2_MOUSE]	O35927	14	17	13.15	15	0.997	1.018	6.5	4.2
595	Coronin-1A OS=Mus musculus GN=Coro1a PE=1 SV=5 - [COR1A_MOUSE]	O89053	10	12	20.61	26.9	1.009	1.018	6	3.2
596	Protein canopy homolog 2 OS=Mus musculus GN=Cnpy2 PE=1 SV=1 - [CNPY2_MOUSE]	Q9QXT0	2	4	15.38	25.27	1.009	1.018	2.1	2.7
597	Endonuclease domain-containing 1 protein OS=Mus musculus GN=Endod1 PE=1 SV=2 - [ENDD1_MOUSE]	Q8C522	5	4	10.18	7.98	0.985	1.018	1.1	5.8
598	ATP synthase protein 8 OS=Mus musculus GN=Mtatp8 PE=1 SV=1 - [ATP8_MOUSE]	P03930	3	4	32.84	35.82	0.809	1.019	9.6	9.6
599	Mitogen-activated protein kinase 3 OS=Mus musculus GN=Mapk3 PE=1 SV=5 - [MK03_MOUSE]	Q63844	7	8	16.05	18.95	1.016	1.019	0.8	1.3
600	Engulfment and cell motility protein 2 OS=Mus musculus GN=Elmo2 PE=1 SV=1 - [ELMO2_MOUSE]	Q8BHL5	12	13	15.16	18.03	1.076	1.019	3.3	1.5
601	Voltage-dependent L-type calcium channel subunit beta-4 OS=Mus musculus GN=Cacnb4 PE=1 SV=2 - [CACB4_MOUSE]	Q8R0S4	10	13	15.61	24.08	0.953	1.019	5.3	7.2
602	6-phosphofructokinase, muscle type OS=Mus musculus GN=Pfkm PE=1 SV=3 - [K6PF_MOUSE]	P47857	29	27	37.05	34.23	0.993	1.019	2	1.5
603	Microtubule-associated protein 1B OS=Mus musculus GN=Map1b PE=1 SV=2 - [MAP1B_MOUSE]	P14873	27	52	11	20.29	1.001	1.02	1.1	1.8
604	UTP--glucose-1-phosphate uridylyltransferase OS=Mus musculus GN=Ugp2 PE=2 SV=3 - [UGPA_MOUSE]	Q91ZJ5	8	12	14.37	22.64	0.978	1.02	2.7	1
605	Phosphatidate cytidylyltransferase 2 OS=Mus musculus GN=Cds2 PE=1 SV=1 - [CDS2_MOUSE]	Q99L43	6	7	18.24	19.59	1.079	1.02	3.8	2.3
606	Paralemmin-2 OS=Mus musculus GN=Palm2 PE=1 SV=1 - [PALM2_MOUSE]	Q8BR92	4	8	9.57	20.48	0.995	1.021	7.6	2.4
607	Membrane-associated progesterone receptor component 1 OS=Mus musculus GN=Pgrmc1 PE=1 SV=4 - [PGRC1_MOUSE]	O55022	11	9	38.97	38.46	0.974	1.021	3.2	2.1
608	Intersectin-1 OS=Mus musculus GN=Itsn1 PE=1 SV=2 - [ITSN1_MOUSE]	Q9Z0R4	7	9	3.33	4.14	1.05	1.021		7
609	Guanine nucleotide-binding protein G(o) subunit alpha OS=Mus musculus GN=Gnao1 PE=1 SV=3 - [GNAO_MOUSE]	P18872	24	21	49.15	49.72	0.937	1.022	0.8	0.8
610	Actin-binding LIM protein 1 OS=Mus musculus GN=Ablim1 PE=1 SV=1 - [ABLM1_MOUSE]	Q8K4G5	6	7	10.22	10.22	0.983	1.022	6.3	2.7
611	Dynactin subunit 1 OS=Mus musculus GN=Dctn1 PE=1 SV=3 - [DCTN1_MOUSE]	O08788	6	13	4.76	12.1	0.88	1.023	25.9	1.7
612	Alpha-actinin-4 OS=Mus musculus GN=Actn4 PE=1 SV=1 - [ACTN4_MOUSE]	P57780	10	19	12.94	23.14	1.003	1.024	1	1.7
613	ADP-ribosylation factor GTPase-activating protein 1 OS=Mus musculus GN=Arfgap1 PE=1 SV=2 - [ARFG1_MOUSE]	Q9EPJ9	5	7	8.45	14.01	0.96	1.024	2.7	3.1
614	Protein shisa-7 OS=Mus musculus GN=Shisa7 PE=1 SV=3 - [SHSA7_MOUSE]	Q8C3Q5	7	7	13.08	10.93	0.987	1.024	4.5	2
615	Regulator of microtubule dynamics protein 3 OS=Mus musculus GN=Rmdn3 PE=1 SV=2 - [RMD3_MOUSE]	Q3UJU9	3	4	9.79	8.94	1.029	1.024	4.1	7.4
616	Kinesin-like protein KIF2A OS=Mus musculus GN=Kif2a PE=1 SV=2 - [KIF2A_MOUSE]	P28740	4	13	6.24	15.46	0.993	1.024	3.6	3.8
617	Neurexin-3 OS=Mus musculus GN=Nrxn3 PE=1 SV=2 - [NRX3A_MOUSE]	Q6P9K9	13	13	9.23	8.66	0.978	1.024	2.1	2.6
618	Vesicle-associated membrane protein-associated protein B OS=Mus musculus GN=Vapb PE=2 SV=3 - [VAPB_MOUSE]	Q9QY76	5	7	23.87	30.86	0.979	1.024	3.2	2.3
619	Tubulin beta-2A chain OS=Mus musculus GN=Tubb2a PE=1 SV=1 - [TBB2A_MOUSE]	Q7TMM9	26	25	61.35	62.47	0.934	1.024	5.2	2.5
620	Heat shock 70 kDa protein 12A OS=Mus musculus GN=Hspa12a PE=1 SV=1 - [HS12A_MOUSE]	Q8K0U4	20	26	30.81	38.52	0.992	1.025	0.6	1.7
621	Serine racemase OS=Mus musculus GN=Srr PE=1 SV=1 - [SRR_MOUSE]	Q9QZX7	2	3	5.6	7.08	0.993	1.025	0.2	2.1
622	F-actin-capping protein subunit alpha-2 OS=Mus musculus GN=Capza2 PE=1 SV=3 - [CAZA2_MOUSE]	P47754	7	12	39.51	46.85	1.048	1.025	2.3	1
623	Glutamine synthetase OS=Mus musculus GN=Glul PE=1 SV=6 - [GLNA_MOUSE]	P15105	20	17	36.46	32.98	0.988	1.025	1.9	3.6
624	Heat shock 70 kDa protein 4L OS=Mus musculus GN=Hspa4l PE=1 SV=2 - [HS74L_MOUSE]	P48722	14	18	16.23	21	1.027	1.025	4.2	2.2
625	Plasma membrane calcium-transporting ATPase 2 OS=Mus musculus GN=Atp2b2 PE=1 SV=2 - [AT2B2_MOUSE]	Q9R0K7	44	55	34.06	38.81	0.942	1.025	1.5	1.4
626	Tubulin alpha-1A chain OS=Mus musculus GN=Tuba1a PE=1 SV=1 - [TBA1A_MOUSE]	P68369	25	23	56.1	49	0.97	1.026	1.3	2
627	Protein sel-1 homolog 1 OS=Mus musculus GN=Sel1l PE=2 SV=2 - [SE1L1_MOUSE]	Q9Z2G6	3	2	3.04	2.15	1.238	1.026	22.9	4.2
628	Rho guanine nucleotide exchange factor 2 OS=Mus musculus GN=Arhgef2 PE=1 SV=4 - [ARHG2_MOUSE]	Q60875	7	10	9.34	11.88	1.096	1.026	9.2	6.1
629	Metabotropic glutamate receptor 1 OS=Mus musculus GN=Grm1 PE=1 SV=2 - [GRM1_MOUSE]	P97772	3	5	2	3.75	0.972	1.026	3.4	3.2
630	Immunoglobulin superfamily member 8 OS=Mus musculus GN=Igsf8 PE=1 SV=2 - [IGSF8_MOUSE]	Q8R366	12	14	24.22	27	0.923	1.026	2.6	2.5
631	Ryanodine receptor 2 OS=Mus musculus GN=Ryr2 PE=1 SV=1 - [RYR2_MOUSE]	E9Q401	6	13	1.23	2.78	0.998	1.027	8.7	5.9
632	Ras-related protein Rab-3C OS=Mus musculus GN=Rab3c PE=1 SV=1 - [RAB3C_MOUSE]	P62823	15	13	62.11	61.23	0.993	1.027	3.5	1.1
633	V-type proton ATPase 116 kDa subunit a isoform 1 OS=Mus musculus GN=Atp6v0a1 PE=1 SV=3 - [VPP1_MOUSE]	Q9Z1G4	32	33	30.39	33.13	1.069	1.027	0.4	0.9
634	Potassium/sodium hyperpolarization-activated cyclic nucleotide-gated channel 1 OS=Mus musculus GN=Hcn1 PE=1 SV=1 - [HCN1_MOUSE]	O88704	4	8	4.29	7.91	0.91	1.027	0.7	1.5
635	CD166 antigen OS=Mus musculus GN=Alcam PE=1 SV=3 - [CD166_MOUSE]	Q61490	7	14	14.92	22.13	0.878	1.028	2.6	2.1
636	Calreticulin OS=Mus musculus GN=Calr PE=1 SV=1 - [CALR_MOUSE]	P14211	18	20	50.48	53.85	1.145	1.028	0.9	2
637	D-3-phosphoglycerate dehydrogenase OS=Mus musculus GN=Phgdh PE=1 SV=3 - [SERA_MOUSE]	Q61753	8	10	16.89	18.76	0.942	1.028	3.6	0.2
638	Metabotropic glutamate receptor 3 OS=Mus musculus GN=Grm3 PE=2 SV=1 - [GRM3_MOUSE]	Q9QYS2	5	16	5.46	18.54	0.953	1.029	3.6	2.3
639	6.8 kDa mitochondrial proteolipid OS=Mus musculus GN=Mp68 PE=2 SV=1 - [68MP_MOUSE]	P56379	2	2	34.48	34.48	0.98	1.029	2.1	3.1
640	MAP kinase-activating death domain protein OS=Mus musculus GN=Madd PE=1 SV=2 - [MADD_MOUSE]	Q80U28	5	6	3.23	4.5	1.047	1.029	7.1	6.6
641	40S ribosomal protein S19 OS=Mus musculus GN=Rps19 PE=1 SV=3 - [RS19_MOUSE]	Q9CZX8	7	6	42.76	36.55	0.985	1.029	0.2	2.1
642	Cell cycle exit and neuronal differentiation protein 1 OS=Mus musculus GN=Cend1 PE=1 SV=1 - [CEND_MOUSE]	Q9JKC6	7	11	55.7	66.44	0.937	1.029	1.2	2.5
643	C-1-tetrahydrofolate synthase, cytoplasmic OS=Mus musculus GN=Mthfd1 PE=1 SV=4 - [C1TC_MOUSE]	Q922D8	5	10	4.81	12.19	0.994	1.029	1.4	0.5
644	Cyclin-Y OS=Mus musculus GN=Ccny PE=1 SV=1 - [CCNY_MOUSE]	Q8BGU5	3	4	9.38	13.78	0.99	1.029	6.4	2.9
645	Tubulin alpha-4A chain OS=Mus musculus GN=Tuba4a PE=1 SV=1 - [TBA4A_MOUSE]	P68368	22	21	52.23	44.87	0.962	1.03	1.1	4.1
646	Protein kinase C epsilon type OS=Mus musculus GN=Prkce PE=1 SV=1 - [KPCE_MOUSE]	P16054	4	8	4.75	8.55	1.035	1.03	2.5	3.3
647	Protein FAM177A1 OS=Mus musculus GN=Fam177a1 PE=2 SV=1 - [F177A_MOUSE]	Q8BR63	2	3	10.63	13.53	0.956	1.03	1.7	5.3
648	Disks large homolog 1 OS=Mus musculus GN=Dlg1 PE=1 SV=1 - [DLG1_MOUSE]	Q811D0	14	24	16.57	25.41	1.007	1.03	3.7	3.1
649	Ras-related protein Rab-18 OS=Mus musculus GN=Rab18 PE=2 SV=2 - [RAB18_MOUSE]	P35293	7	8	28.64	36.89	0.918	1.03	1.8	4.1
650	Peroxisomal multifunctional enzyme type 2 OS=Mus musculus GN=Hsd17b4 PE=1 SV=3 - [DHB4_MOUSE]	P51660	12	17	17.69	22.72	1.043	1.031	1.4	0.7
651	Receptor-type tyrosine-protein phosphatase delta OS=Mus musculus GN=Ptprd PE=1 SV=3 - [PTPRD_MOUSE]	Q64487	9	22	5.49	13.86	0.969	1.032	0.3	1.8
652	Ras-related protein Rab-5B OS=Mus musculus GN=Rab5b PE=1 SV=1 - [RAB5B_MOUSE]	P61021	10	9	48.84	50.23	1.128	1.032	10.7	2
653	60S ribosomal protein L28 OS=Mus musculus GN=Rpl28 PE=1 SV=2 - [RL28_MOUSE]	P41105	6	12	33.58	55.47	1.062	1.033	1	4
654	Myosin-10 OS=Mus musculus GN=Myh10 PE=1 SV=2 - [MYH10_MOUSE]	Q61879	26	53	12.6	29.5	1.025	1.033	1.4	2.3
655	Fatty aldehyde dehydrogenase OS=Mus musculus GN=Aldh3a2 PE=2 SV=2 - [AL3A2_MOUSE]	P47740	8	11	12.19	20.87	1.046	1.034	4.8	6
656	Neurofascin OS=Mus musculus GN=Nfasc PE=1 SV=1 - [NFASC_MOUSE]	Q810U3	26	34	23.06	25.48	0.898	1.034	1.5	0.6
657	Tyrosine-protein kinase Fyn OS=Mus musculus GN=Fyn PE=1 SV=4 - [FYN_MOUSE]	P39688	9	8	14.15	12.1	0.955	1.034	2.9	0.2
658	Probable G-protein coupled receptor 158 OS=Mus musculus GN=Gpr158 PE=1 SV=2 - [GP158_MOUSE]	Q8C419	7	15	6	11.25	0.998	1.034	3	2.2
659	UPF0556 protein C19orf10 homolog OS=Mus musculus GN=D17Wsu104e PE=2 SV=1 - [CS010_MOUSE]	Q9CPT4	3	4	18.07	24.7	0.927	1.034	2.4	3.9
660	Dipeptidyl aminopeptidase-like protein 6 OS=Mus musculus GN=Dpp6 PE=1 SV=1 - [DPP6_MOUSE]	Q9Z218	26	29	32.71	36.44	0.927	1.035	1.8	0.7
661	NADH-cytochrome b5 reductase 3 OS=Mus musculus GN=Cyb5r3 PE=1 SV=3 - [NB5R3_MOUSE]	Q9DCN2	8	7	26.25	19.93	1.08	1.035	2.7	2
662	Unconventional myosin-VI OS=Mus musculus GN=Myo6 PE=1 SV=1 - [MYO6_MOUSE]	Q64331	12	18	8.3	14.62	0.966	1.035	3.3	2.8
663	3-ketoacyl-CoA thiolase A, peroxisomal OS=Mus musculus GN=Acaa1a PE=1 SV=1 - [THIKA_MOUSE]	Q921H8	6	7	18.16	23.35	1.022	1.036	3.9	3.8
664	Actin, alpha cardiac muscle 1 OS=Mus musculus GN=Actc1 PE=1 SV=1 - [ACTC_MOUSE]	P68033	28	21	61.27	48.81	1.169	1.036	12	1.6
665	Leucine-rich repeat and immunoglobulin-like domain-containing nogo receptor-interacting protein 1 OS=Mus musculus GN=Lingo1 PE=1 SV=1 - [LIGO1_MOUSE]	Q9D1T0	6	12	9.93	19.54	0.874	1.037	2.2	1.6
666	Protein disulfide-isomerase OS=Mus musculus GN=P4hb PE=1 SV=2 - [PDIA1_MOUSE]	P09103	23	22	40.47	42.04	1.074	1.037	1.5	1.6
667	PH and SEC7 domain-containing protein 3 OS=Mus musculus GN=Psd3 PE=1 SV=2 - [PSD3_MOUSE]	Q2PFD7	11	12	10.03	12.44	1.058	1.038	4.8	2.6
668	Connector enhancer of kinase suppressor of ras 2 OS=Mus musculus GN=Cnksr2 PE=1 SV=1 - [CNKR2_MOUSE]	Q80YA9	11	17	11.43	17.73	0.976	1.038	3	3
669	Electrogenic sodium bicarbonate cotransporter 1 OS=Mus musculus GN=Slc4a4 PE=1 SV=2 - [S4A4_MOUSE]	O88343	20	20	21.59	23.35	0.911	1.038	3.1	1.4
670	Cell adhesion molecule 3 OS=Mus musculus GN=Cadm3 PE=1 SV=1 - [CADM3_MOUSE]	Q99N28	5	8	17.42	28.28	0.956	1.038	5.1	2.9
671	Dolichyl-diphosphooligosaccharide--protein glycosyltransferase 48 kDa subunit OS=Mus musculus GN=Ddost PE=1 SV=2 - [OST48_MOUSE]	O54734	5	8	8.84	16.33	0.998	1.039	4.5	4.8
672	DnaJ homolog subfamily A member 1 OS=Mus musculus GN=Dnaja1 PE=1 SV=1 - [DNJA1_MOUSE]	P63037	10	11	16.12	33	1.067	1.039	3.9	3.6
673	Disks large homolog 2 OS=Mus musculus GN=Dlg2 PE=1 SV=2 - [DLG2_MOUSE]	Q91XM9	17	29	21.48	38.03	1.014	1.039	4.9	2.1
674	Estradiol 17-beta-dehydrogenase 11 OS=Mus musculus GN=Hsd17b11 PE=2 SV=1 - [DHB11_MOUSE]	Q9EQ06	4	4	11.07	13.42	1.084	1.04	1.1	0
675	Long-chain-fatty-acid--CoA ligase 1 OS=Mus musculus GN=Acsl1 PE=1 SV=2 - [ACSL1_MOUSE]	P41216	6	9	8.15	14.45	1.092	1.04	10.5	1.3
676	NAD kinase 2, mitochondrial OS=Mus musculus GN=Nadk2 PE=1 SV=2 - [NAKD2_MOUSE]	Q8C5H8	3	4	8.19	9.51	1.111	1.04	3.6	8.3
677	Ras-related protein Rab-4B OS=Mus musculus GN=Rab4b PE=2 SV=2 - [RAB4B_MOUSE]	Q91ZR1	5	5	27.23	24.41	1.023	1.04	2.2	2.4
678	60S ribosomal protein L7a OS=Mus musculus GN=Rpl7a PE=2 SV=2 - [RL7A_MOUSE]	P12970	9	11	27.07	30.08	0.96	1.041	3.2	4.1
679	Ras-related protein Rap-2b OS=Mus musculus GN=Rap2b PE=1 SV=1 - [RAP2B_MOUSE]	P61226	6	10	34.43	37.16	0.837	1.041	5.8	5.9
680	Gamma-adducin OS=Mus musculus GN=Add3 PE=1 SV=2 - [ADDG_MOUSE]	Q9QYB5	6	13	8.36	18.41	0.986	1.041	5.2	1.5
681	Carnitine O-palmitoyltransferase 1, brain isoform OS=Mus musculus GN=Cpt1c PE=1 SV=1 - [CPT1C_MOUSE]	Q8BGD5	3	5	3.76	7.39	1.006	1.042	6.7	2.7
682	Vesicle-associated membrane protein-associated protein A OS=Mus musculus GN=Vapa PE=1 SV=2 - [VAPA_MOUSE]	Q9WV55	7	13	28.11	46.59	0.948	1.042	3.4	0.4
683	60S ribosomal protein L12 OS=Mus musculus GN=Rpl12 PE=1 SV=2 - [RL12_MOUSE]	P35979	7	5	40	30.91	0.99	1.042	5.3	0.9
684	Limbic system-associated membrane protein OS=Mus musculus GN=Lsamp PE=1 SV=1 - [LSAMP_MOUSE]	Q8BLK3	14	12	35.19	32.26	0.865	1.042	3.2	0.4
685	SLIT-ROBO Rho GTPase-activating protein 3 OS=Mus musculus GN=Srgap3 PE=1 SV=1 - [SRGP3_MOUSE]	Q812A2	5	9	3.64	7.64	1.095	1.043	8.9	2.4
686	Disks large-associated protein 3 OS=Mus musculus GN=Dlgap3 PE=1 SV=1 - [DLGP3_MOUSE]	Q6PFD5	11	17	10.34	16.38	0.893	1.043	1.5	1.7
687	Myosin-14 OS=Mus musculus GN=Myh14 PE=1 SV=1 - [MYH14_MOUSE]	Q6URW6	12	20	4.9	8.2	1.075	1.043	6.3	2.3
688	Syntaxin-1A OS=Mus musculus GN=Stx1a PE=1 SV=3 - [STX1A_MOUSE]	O35526	11	24	28.13	71.18	0.907	1.043	1.6	1.3
689	Glutamate receptor 1 OS=Mus musculus GN=Gria1 PE=1 SV=1 - [GRIA1_MOUSE]	P23818	23	31	26.02	32.3	0.925	1.044	2.1	3.1
690	Prenylcysteine oxidase OS=Mus musculus GN=Pcyox1 PE=1 SV=1 - [PCYOX_MOUSE]	Q9CQF9	7	10	13.47	20	0.966	1.044	2.6	1.8
691	Synaptojanin-2-binding protein OS=Mus musculus GN=Synj2bp PE=1 SV=1 - [SYJ2B_MOUSE]	Q9D6K5	3	3	27.59	26.21	1.143	1.044	2.4	4.8
692	Protein disulfide-isomerase A6 OS=Mus musculus GN=Pdia6 PE=1 SV=3 - [PDIA6_MOUSE]	Q922R8	8	9	19.77	23.18	1.1	1.044	6.2	3.5
693	NADH-cytochrome b5 reductase 1 OS=Mus musculus GN=Cyb5r1 PE=2 SV=1 - [NB5R1_MOUSE]	Q9DB73	8	7	25.25	24.92	1.064	1.044	3.8	2.8
694	Transcriptional activator protein Pur-alpha OS=Mus musculus GN=Pura PE=1 SV=1 - [PURA_MOUSE]	P42669	4	7	14.33	27.41	0.99	1.044	2.6	1.2
695	Peptidyl-prolyl cis-trans isomerase FKBP8 OS=Mus musculus GN=Fkbp8 PE=1 SV=2 - [FKBP8_MOUSE]	O35465	2	5	3.73	12.19	1.048	1.045	9.8	3.1
696	Unconventional myosin-Va OS=Mus musculus GN=Myo5a PE=1 SV=2 - [MYO5A_MOUSE]	Q99104	37	64	18.19	34.92	0.979	1.045	2.4	1.6
697	Iron-sulfur cluster assembly 2 homolog, mitochondrial OS=Mus musculus GN=Isca2 PE=2 SV=2 - [ISCA2_MOUSE]	Q9DCB8	2	2	20.78	20.78	1.065	1.045	7.4	2.5
698	Heme oxygenase 2 OS=Mus musculus GN=Hmox2 PE=2 SV=1 - [HMOX2_MOUSE]	O70252	4	7	15.24	23.17	1.096	1.046	1.6	3.1
699	Cytosol aminopeptidase OS=Mus musculus GN=Lap3 PE=1 SV=3 - [AMPL_MOUSE]	Q9CPY7	12	12	22.16	24.28	1.041	1.046	2.4	1.9
700	Transferrin receptor protein 1 OS=Mus musculus GN=Tfrc PE=1 SV=1 - [TFR1_MOUSE]	Q62351	3	2	4.46	2.1	1.074	1.046	14.7	4.1
701	Dematin OS=Mus musculus GN=Dmtn PE=1 SV=1 - [DEMA_MOUSE]	Q9WV69	6	4	15.8	9.14	0.989	1.047	1.7	0.2
702	SH3 and multiple ankyrin repeat domains protein 2 OS=Mus musculus GN=Shank2 PE=1 SV=2 - [SHAN2_MOUSE]	Q80Z38	12	23	8.2	17.75	0.957	1.047	1.6	0.9
703	Cytochrome c oxidase subunit 5A, mitochondrial OS=Mus musculus GN=Cox5a PE=1 SV=2 - [COX5A_MOUSE]	P12787	10	9	63.7	59.59	0.746	1.047	1.3	2.4
704	Prolow-density lipoprotein receptor-related protein 1 OS=Mus musculus GN=Lrp1 PE=1 SV=1 - [LRP1_MOUSE]	Q91ZX7	7	23	1.1	4.91	1.012	1.047	4.1	1.2
705	CDGSH iron-sulfur domain-containing protein 1 OS=Mus musculus GN=Cisd1 PE=1 SV=1 - [CISD1_MOUSE]	Q91WS0	5	4	46.3	37.96	0.991	1.047	3.8	1.3
706	Peroxiredoxin-6 OS=Mus musculus GN=Prdx6 PE=1 SV=3 - [PRDX6_MOUSE]	O08709	12	13	51.34	63.39	0.985	1.047	1.1	1
707	NAD(P)H-hydrate epimerase OS=Mus musculus GN=Apoa1bp PE=1 SV=1 - [NNRE_MOUSE]	Q8K4Z3	6	3	30.85	9.57	1.073	1.048	4.6	2.6
708	60S ribosomal protein L17 OS=Mus musculus GN=Rpl17 PE=2 SV=3 - [RL17_MOUSE]	Q9CPR4	5	7	23.91	36.41	1.015	1.048	0.7	2
709	60S ribosomal protein L13 OS=Mus musculus GN=Rpl13 PE=2 SV=3 - [RL13_MOUSE]	P47963	10	13	36.97	47.87	0.997	1.048	1.5	1.5
710	Protein kinase C beta type OS=Mus musculus GN=Prkcb PE=1 SV=4 - [KPCB_MOUSE]	P68404	14	15	18.63	20.72	0.921	1.048	2.6	1.1
711	Contactin-associated protein 1 OS=Mus musculus GN=Cntnap1 PE=2 SV=2 - [CNTP1_MOUSE]	O54991	19	24	14.37	18.48	1.006	1.048	1.2	2.3
712	Phosphatidylinositide phosphatase SAC1 OS=Mus musculus GN=Sacm1l PE=2 SV=1 - [SAC1_MOUSE]	Q9EP69	4	8	6.13	13.63	1.044	1.049	1.5	4.4
713	Sodium/potassium-transporting ATPase subunit alpha-2 OS=Mus musculus GN=Atp1a2 PE=1 SV=1 - [AT1A2_MOUSE]	Q6PIE5	68	66	51.86	56.37	0.927	1.049	1.8	1.9
714	NADH dehydrogenase [ubiquinone] 1 beta subcomplex subunit 4 OS=Mus musculus GN=Ndufb4 PE=1 SV=3 - [NDUB4_MOUSE]	Q9CQC7	8	8	58.14	55.04	0.982	1.049	1.5	7.5
715	SH3 and multiple ankyrin repeat domains protein 1 OS=Mus musculus GN=Shank1 PE=1 SV=1 - [SHAN1_MOUSE]	D3YZU1	16	19	8.72	9.55	0.941	1.049	0.6	1.6
716	Contactin-associated protein-like 2 OS=Mus musculus GN=Cntnap2 PE=1 SV=2 - [CNTP2_MOUSE]	Q9CPW0	9	14	5.33	10.36	0.882	1.05	4.5	1.3
717	Cytochrome b-c1 complex subunit 8 OS=Mus musculus GN=Uqcrq PE=1 SV=3 - [QCR8_MOUSE]	Q9CQ69	10	9	87.8	86.59	0.888	1.05	3.8	1.6
718	Sarcoplasmic/endoplasmic reticulum calcium ATPase 2 OS=Mus musculus GN=Atp2a2 PE=1 SV=2 - [AT2A2_MOUSE]	O55143	31	35	27.68	31.13	1.024	1.05	2.2	0.8
719	IQ motif and SEC7 domain-containing protein 2 OS=Mus musculus GN=Iqsec2 PE=1 SV=3 - [IQEC2_MOUSE]	Q5DU25	10	20	6.36	14.75	0.955	1.051	5.3	1.8
720	Cadherin-2 OS=Mus musculus GN=Cdh2 PE=1 SV=2 - [CADH2_MOUSE]	P15116	6	9	8.28	13.58	0.879	1.051	2.9	1.8
721	Long-chain fatty acid transport protein 4 OS=Mus musculus GN=Slc27a4 PE=1 SV=1 - [S27A4_MOUSE]	Q91VE0	5	3	8.24	4.98	0.995	1.051	6.5	0.2
722	Voltage-dependent R-type calcium channel subunit alpha-1E OS=Mus musculus GN=Cacna1e PE=1 SV=1 - [CAC1E_MOUSE]	Q61290	7	8	2.73	2.86	1.009	1.051	6.9	1.8
723	Excitatory amino acid transporter 2 OS=Mus musculus GN=Slc1a2 PE=1 SV=1 - [EAA2_MOUSE]	P43006	22	23	39.34	40.38	0.877	1.051	1.7	0.9
724	Synaptotagmin-7 OS=Mus musculus GN=Syt7 PE=1 SV=1 - [SYT7_MOUSE]	Q9R0N7	8	12	22.33	28.29	0.956	1.052	0.8	2.6
725	Uncharacterized protein KIAA1671 OS=Mus musculus GN=Kiaa1671 PE=2 SV=1 - [K1671_MOUSE]	Q8BRV5	4	4	12.66	12.99	1.04	1.052	6.9	4.6
726	Non-specific lipid-transfer protein OS=Mus musculus GN=Scp2 PE=1 SV=3 - [NLTP_MOUSE]	P32020	7	9	9.87	12.43	0.877	1.052	4.6	1.5
727	Protein NipSnap homolog 1 OS=Mus musculus GN=Nipsnap1 PE=1 SV=1 - [NIPS1_MOUSE]	O55125	14	11	39.79	33.45	1.055	1.052	1.9	0.9
728	Neutral alpha-glucosidase AB OS=Mus musculus GN=Ganab PE=1 SV=1 - [GANAB_MOUSE]	Q8BHN3	12	13	14.62	16	1.057	1.053	1.7	1.7
729	Integrin alpha-V OS=Mus musculus GN=Itgav PE=1 SV=2 - [ITAV_MOUSE]	P43406	3	4	2.49	3.07	0.944	1.053	5	3.6
730	Transmembrane protein 35 OS=Mus musculus GN=Tmem35 PE=2 SV=1 - [TMM35_MOUSE]	Q9D328	3	3	17.96	15.57	1.04	1.053	3.4	4.3
731	Protein NDRG2 OS=Mus musculus GN=Ndrg2 PE=1 SV=1 - [NDRG2_MOUSE]	Q9QYG0	11	12	37.74	46.09	1.044	1.053	2.2	1.1
732	ERC protein 2 OS=Mus musculus GN=Erc2 PE=2 SV=2 - [ERC2_MOUSE]	Q6PH08	19	33	16.61	29.47	0.859	1.053	2.4	0.9
733	Protein piccolo OS=Mus musculus GN=Pclo PE=1 SV=4 - [PCLO_MOUSE]	Q9QYX7	33	73	8.37	17.11	0.932	1.053	3.7	1.4
734	Elongation factor 1-gamma OS=Mus musculus GN=Eef1g PE=1 SV=3 - [EF1G_MOUSE]	Q9D8N0	4	6	7.32	11.44	1.062	1.053	5.1	5.1
735	Calcium/calmodulin-dependent protein kinase type II subunit beta OS=Mus musculus GN=Camk2b PE=1 SV=2 - [KCC2B_MOUSE]	P28652	31	35	58.86	65.68	1.062	1.054	2.4	0
736	Isochorismatase domain-containing protein 2A, mitochondrial OS=Mus musculus GN=Isoc2a PE=1 SV=1 - [ISC2A_MOUSE]	P85094	4	2	23.79	12.14	1.024	1.054	5.4	1.7
737	40S ribosomal protein S13 OS=Mus musculus GN=Rps13 PE=2 SV=2 - [RS13_MOUSE]	P62301	10	9	47.02	51.66	0.948	1.055	0.7	5.3
738	Neuronal cell adhesion molecule OS=Mus musculus GN=Nrcam PE=1 SV=2 - [NRCAM_MOUSE]	Q810U4	10	18	8.36	13.77	0.938	1.055	1.7	3.2
739	Plexin-A1 OS=Mus musculus GN=Plxna1 PE=1 SV=1 - [PLXA1_MOUSE]	P70206	8	13	4.28	5.65	0.933	1.055	1.2	1.1
740	Tenascin-R OS=Mus musculus GN=Tnr PE=1 SV=2 - [TENR_MOUSE]	Q8BYI9	13	17	12	16.35	1.008	1.055	2.9	1.2
741	CLIP-associating protein 2 OS=Mus musculus GN=Clasp2 PE=1 SV=1 - [CLAP2_MOUSE]	Q8BRT1	11	16	8.09	13.92	0.993	1.055	10.1	1.2
742	Peptidyl-prolyl cis-trans isomerase B OS=Mus musculus GN=Ppib PE=2 SV=2 - [PPIB_MOUSE]	P24369	11	11	43.52	46.76	1.065	1.055	1.5	0.3
743	Ras-related protein Rab-5C OS=Mus musculus GN=Rab5c PE=1 SV=2 - [RAB5C_MOUSE]	P35278	8	9	42.59	42.59	0.965	1.055	2.3	1.7
744	Protein RUFY3 OS=Mus musculus GN=Rufy3 PE=1 SV=1 - [RUFY3_MOUSE]	Q9D394	9	15	18.55	30.28	1.018	1.056	7	2
745	Protein FAM136A OS=Mus musculus GN=Fam136a PE=2 SV=1 - [F136A_MOUSE]	Q9CR98	3	4	18.12	22.46	0.882	1.057	6.6	6.2
746	Ras-related protein Rab-5A OS=Mus musculus GN=Rab5a PE=1 SV=1 - [RAB5A_MOUSE]	Q9CQD1	8	8	36.74	44.19	1.045	1.057	3.8	1
747	60S ribosomal protein L29 OS=Mus musculus GN=Rpl29 PE=2 SV=2 - [RL29_MOUSE]	P47915	9	8	41.88	32.5	0.991	1.057	4	3.6
748	Serine/threonine-protein kinase DCLK1 OS=Mus musculus GN=Dclk1 PE=1 SV=1 - [DCLK1_MOUSE]	Q9JLM8	18	18	24.74	29.5	0.931	1.057	2.7	2
749	Long-chain-fatty-acid--CoA ligase ACSBG1 OS=Mus musculus GN=Acsbg1 PE=1 SV=1 - [ACBG1_MOUSE]	Q99PU5	7	14	12.34	20.11	1.074	1.057	0.7	1.1
750	Protein bassoon OS=Mus musculus GN=Bsn PE=1 SV=4 - [BSN_MOUSE]	O88737	82	89	27.35	28.06	0.924	1.057	1	0.6
751	Calpain-5 OS=Mus musculus GN=Capn5 PE=2 SV=1 - [CAN5_MOUSE]	O08688	6	5	11.09	8.13	0.949	1.057	0.4	4.4
752	Retinol dehydrogenase 14 OS=Mus musculus GN=Rdh14 PE=2 SV=1 - [RDH14_MOUSE]	Q9ERI6	6	6	20.66	20.66	1.036	1.058	5.9	4.6
753	Ras-related protein Rab-3B OS=Mus musculus GN=Rab3b PE=1 SV=1 - [RAB3B_MOUSE]	Q9CZT8	10	9	60.27	36.99	0.99	1.058	2.8	3
754	4F2 cell-surface antigen heavy chain OS=Mus musculus GN=Slc3a2 PE=1 SV=1 - [4F2_MOUSE]	P10852	20	27	36.12	50	0.907	1.058	1.8	2
755	Acyl-protein thioesterase 2 OS=Mus musculus GN=Lypla2 PE=1 SV=1 - [LYPA2_MOUSE]	Q9WTL7	3	3	9.09	9.09	1.003	1.059	8.5	2.6
756	Ephrin type-A receptor 4 OS=Mus musculus GN=Epha4 PE=1 SV=2 - [EPHA4_MOUSE]	Q03137	7	9	6.69	10.65	0.929	1.059	4.4	2.7
757	ARF GTPase-activating protein GIT1 OS=Mus musculus GN=Git1 PE=1 SV=1 - [GIT1_MOUSE]	Q68FF6	6	10	7.53	12.34	0.986	1.06	5.9	5.4
758	Endoplasmin OS=Mus musculus GN=Hsp90b1 PE=1 SV=2 - [ENPL_MOUSE]	P08113	23	27	22.57	29.43	1.057	1.06	4.1	0.4
759	Intercellular adhesion molecule 5 OS=Mus musculus GN=Icam5 PE=1 SV=2 - [ICAM5_MOUSE]	Q60625	13	11	10.8	8.72	0.913	1.061	3.4	8.3
760	Neurexin-1 OS=Mus musculus GN=Nrxn1 PE=1 SV=3 - [NRX1A_MOUSE]	Q9CS84	17	23	12.48	16.84	0.938	1.061	2.4	5.3
761	60S ribosomal protein L36a OS=Mus musculus GN=Rpl36a PE=3 SV=2 - [RL36A_MOUSE]	P83882	3	5	19.81	24.53	0.996	1.061	7.6	4.6
762	Peripheral plasma membrane protein CASK OS=Mus musculus GN=Cask PE=1 SV=2 - [CSKP_MOUSE]	O70589	4	7	4.43	5.18	1.038	1.062	0.7	2.2
763	SRC kinase signaling inhibitor 1 OS=Mus musculus GN=Srcin1 PE=1 SV=2 - [SRCN1_MOUSE]	Q9QWI6	34	49	26.48	39.52	0.929	1.062	1	0.4
764	Protein lifeguard 2 OS=Mus musculus GN=Faim2 PE=2 SV=1 - [LFG2_MOUSE]	Q8K097	3	2	13.88	11.99	1.041	1.062	6.4	4.4
765	60S ribosomal protein L26 OS=Mus musculus GN=Rpl26 PE=2 SV=1 - [RL26_MOUSE]	P61255	6	5	31.03	26.21	0.908	1.063	3.5	3.6
766	60S ribosomal protein L30 OS=Mus musculus GN=Rpl30 PE=2 SV=2 - [RL30_MOUSE]	P62889	2	3	18.26	23.48	0.948	1.064	4.4	2.5
767	Protein disulfide-isomerase A3 OS=Mus musculus GN=Pdia3 PE=1 SV=2 - [PDIA3_MOUSE]	P27773	27	32	51.88	59.8	1.077	1.064	1.3	0.3
768	OCIA domain-containing protein 1 OS=Mus musculus GN=Ociad1 PE=1 SV=1 - [OCAD1_MOUSE]	Q9CRD0	2	4	16.6	17.81	1.043	1.065	12.7	0.1
769	Ras/Rap GTPase-activating protein SynGAP OS=Mus musculus GN=Syngap1 PE=1 SV=2 - [SYGP1_MOUSE]	F6SEU4	56	60	44.25	44.85	0.958	1.065	0.5	1
770	Protein tweety homolog 1 OS=Mus musculus GN=Ttyh1 PE=1 SV=1 - [TTYH1_MOUSE]	Q9D3A9	7	7	15.56	15.78	0.982	1.066	5.3	3.9
771	Kalirin OS=Mus musculus GN=Kalrn PE=1 SV=1 - [KALRN_MOUSE]	A2CG49	8	10	2.43	3.04	1.031	1.066	3.9	3.4
772	Isoaspartyl peptidase/L-asparaginase OS=Mus musculus GN=Asrgl1 PE=1 SV=1 - [ASGL1_MOUSE]	Q8C0M9	8	9	22.09	29.45	0.94	1.066	1.8	5.8
773	Tubulin beta-5 chain OS=Mus musculus GN=Tubb5 PE=1 SV=1 - [TBB5_MOUSE]	P99024	23	22	54.28	61.71	0.92	1.067	1.8	1.8
774	Phospholipid hydroperoxide glutathione peroxidase, mitochondrial OS=Mus musculus GN=Gpx4 PE=1 SV=4 - [GPX41_MOUSE]	O70325	3	6	13.71	24.87	0.978	1.067	2.7	5.7
775	Translocon-associated protein subunit delta OS=Mus musculus GN=Ssr4 PE=2 SV=1 - [SSRD_MOUSE]	Q62186	2	3	12.21	18.02	1.019	1.067	2.2	6.4
776	5'-nucleotidase domain-containing protein 3 OS=Mus musculus GN=Nt5dc3 PE=2 SV=1 - [NT5D3_MOUSE]	Q3UHB1	21	21	36.45	37.91	1.089	1.067	1.9	2.1
777	NADH dehydrogenase [ubiquinone] 1 beta subcomplex subunit 8, mitochondrial OS=Mus musculus GN=Ndufb8 PE=1 SV=1 - [NDUB8_MOUSE]	Q9D6J5	4	5	31.72	34.41	0.942	1.067	1.6	2.9
778	Arf-GAP with GTPase, ANK repeat and PH domain-containing protein 2 OS=Mus musculus GN=Agap2 PE=2 SV=1 - [AGAP2_MOUSE]	Q3UHD9	10	16	9.02	14.92	0.993	1.067	2.2	1.4
779	Erlin-2 OS=Mus musculus GN=Erlin2 PE=1 SV=1 - [ERLN2_MOUSE]	Q8BFZ9	9	9	22.35	22.35	1.035	1.067	1.2	2.1
780	Short/branched chain specific acyl-CoA dehydrogenase, mitochondrial OS=Mus musculus GN=Acadsb PE=1 SV=1 - [ACDSB_MOUSE]	Q9DBL1	2	3	6.48	6.71	1.137	1.067
781	Fructose-bisphosphate aldolase C OS=Mus musculus GN=Aldoc PE=1 SV=4 - [ALDOC_MOUSE]	P05063	21	26	46.56	58.68	1.069	1.068	2.7	0.5
782	Microtubule-associated protein RP/EB family member 2 OS=Mus musculus GN=Mapre2 PE=1 SV=1 - [MARE2_MOUSE]	Q8R001	6	9	20.55	27.3	0.952	1.068	5.3	3.2
783	Disintegrin and metalloproteinase domain-containing protein 11 OS=Mus musculus GN=Adam11 PE=1 SV=2 - [ADA11_MOUSE]	Q9R1V4	4	4	5.3	4.66	1.004	1.068	2.4	3.4
784	Mitochondrial import inner membrane translocase subunit TIM44 OS=Mus musculus GN=Timm44 PE=2 SV=2 - [TIM44_MOUSE]	O35857	6	4	13.72	9.07	1.057	1.069	4.6	15.9
785	40S ribosomal protein S23 OS=Mus musculus GN=Rps23 PE=2 SV=3 - [RS23_MOUSE]	P62267	5	4	23.08	20.98	0.888	1.07	2.1	1.8
786	SH3 and multiple ankyrin repeat domains protein 3 OS=Mus musculus GN=Shank3 PE=1 SV=3 - [SHAN3_MOUSE]	Q4ACU6	10	16	6.36	12.54	0.963	1.07	6.9	1.8
787	Ankyrin repeat and sterile alpha motif domain-containing protein 1B OS=Mus musculus GN=Anks1b PE=1 SV=3 - [ANS1B_MOUSE]	Q8BIZ1	14	15	10.09	9.29	0.968	1.07	1.7	0.9
788	NADH dehydrogenase [ubiquinone] iron-sulfur protein 6, mitochondrial OS=Mus musculus GN=Ndufs6 PE=1 SV=2 - [NDUS6_MOUSE]	P52503	5	6	41.38	41.38	0.876	1.07	9.6	1.8
789	Alpha-1,3/1,6-mannosyltransferase ALG2 OS=Mus musculus GN=Alg2 PE=2 SV=2 - [ALG2_MOUSE]	Q9DBE8	6	6	16.14	16.39	1.068	1.07	7.5	2.4
790	Coiled-coil-helix-coiled-coil-helix domain-containing protein 6, mitochondrial OS=Mus musculus GN=Chchd6 PE=2 SV=2 - [CHCH6_MOUSE]	Q91VN4	10	7	28.21	27.47	0.96	1.071	5.9	3.9
791	Brain-enriched guanylate kinase-associated protein OS=Mus musculus GN=Begain PE=1 SV=2 - [BEGIN_MOUSE]	Q68EF6	4	4	9	7	0.984	1.071	7.9	7.2
792	TBC1 domain family member 10B OS=Mus musculus GN=Tbc1d10b PE=1 SV=2 - [TB10B_MOUSE]	Q8BHL3	6	3	11.15	4.51	1.004	1.071	4.6	2.2
793	Mitochondrial import receptor subunit TOM40 homolog OS=Mus musculus GN=Tomm40 PE=1 SV=3 - [TOM40_MOUSE]	Q9QYA2	6	6	16.9	16.9	1.012	1.071	2.9	6.5
794	Calcium/calmodulin-dependent protein kinase type II subunit gamma OS=Mus musculus GN=Camk2g PE=1 SV=1 - [KCC2G_MOUSE]	Q923T9	25	27	43.48	47.26	0.943	1.071	1.5	4.7
795	Vesicle-trafficking protein SEC22b OS=Mus musculus GN=Sec22b PE=1 SV=3 - [SC22B_MOUSE]	O08547	5	6	30.7	38.6	0.936	1.072	4.2	4.8
796	Receptor-type tyrosine-protein phosphatase alpha OS=Mus musculus GN=Ptpra PE=1 SV=3 - [PTPRA_MOUSE]	P18052	5	6	4.95	6.27	1.012	1.072	1.3	4
797	Flotillin-2 OS=Mus musculus GN=Flot2 PE=1 SV=2 - [FLOT2_MOUSE]	Q60634	10	17	22.43	39.02	0.936	1.072	2.1	0
798	Mitochondrial carrier homolog 1 OS=Mus musculus GN=Mtch1 PE=2 SV=1 - [MTCH1_MOUSE]	Q791T5	6	5	18.25	13.37	1	1.072	4.7	7.1
799	Cysteine desulfurase, mitochondrial OS=Mus musculus GN=Nfs1 PE=2 SV=3 - [NFS1_MOUSE]	Q9Z1J3	4	4	10.02	8.28	1.039	1.073	5.4	1.4
800	ATP synthase subunit g, mitochondrial OS=Mus musculus GN=Atp5l PE=1 SV=1 - [ATP5L_MOUSE]	Q9CPQ8	10	9	89.32	83.5	0.827	1.073	1.7	2.4
801	60S ribosomal protein L10 OS=Mus musculus GN=Rpl10 PE=2 SV=3 - [RL10_MOUSE]	Q6ZWV3	5	7	20.09	23.36	0.977	1.074	9.6	5
802	Nuclease EXOG, mitochondrial OS=Mus musculus GN=Exog PE=2 SV=1 - [EXOG_MOUSE]	Q8C163	5	6	13.86	20.92	1.103	1.074	8.6	3.3
803	Mitochondrial import receptor subunit TOM70 OS=Mus musculus GN=Tomm70a PE=1 SV=2 - [TOM70_MOUSE]	Q9CZW5	15	19	19.64	27.17	1.07	1.074	0.2	3.4
804	Protein disulfide-isomerase A4 OS=Mus musculus GN=Pdia4 PE=1 SV=3 - [PDIA4_MOUSE]	P08003	16	13	20.85	19.91	1.009	1.074	3	4.9
805	ATPase inhibitor, mitochondrial OS=Mus musculus GN=Atpif1 PE=2 SV=2 - [ATIF1_MOUSE]	O35143	10	13	48.11	50	0.763	1.074	1.2	1.5
806	40S ribosomal protein S5 OS=Mus musculus GN=Rps5 PE=2 SV=3 - [RS5_MOUSE]	P97461	2	3	8.33	12.75	0.975	1.074	18.2	6.5
807	Voltage-dependent calcium channel gamma-8 subunit OS=Mus musculus GN=Cacng8 PE=1 SV=1 - [CCG8_MOUSE]	Q8VHW2	9	9	29.31	29.31	0.901	1.075	3.2	0.5
808	NADH dehydrogenase [ubiquinone] flavoprotein 2, mitochondrial OS=Mus musculus GN=Ndufv2 PE=1 SV=2 - [NDUV2_MOUSE]	Q9D6J6	13	12	45.56	47.98	1.04	1.075	1.1	1
809	Neuroplastin OS=Mus musculus GN=Nptn PE=1 SV=3 - [NPTN_MOUSE]	P97300	11	14	23.43	28.72	0.877	1.075	1.4	1.4
810	Leucine-rich repeat-containing protein 7 OS=Mus musculus GN=Lrrc7 PE=1 SV=2 - [LRRC7_MOUSE]	Q80TE7	14	25	8.66	19.33	0.929	1.075	9.2	2
811	Calcium/calmodulin-dependent protein kinase type 1D OS=Mus musculus GN=Camk1d PE=1 SV=2 - [KCC1D_MOUSE]	Q8BW96	7	7	19.74	20.52	1.023	1.075	10.5	3
812	Excitatory amino acid transporter 1 OS=Mus musculus GN=Slc1a3 PE=1 SV=2 - [EAA1_MOUSE]	P56564	17	18	33.15	30.76	0.902	1.075	2.3	7.1
813	Metabotropic glutamate receptor 5 OS=Mus musculus GN=Grm5 PE=1 SV=2 - [GRM5_MOUSE]	Q3UVX5	9	13	6.23	10.06	1.012	1.076	1.2	0.8
814	Receptor-type tyrosine-protein phosphatase zeta OS=Mus musculus GN=Ptprz1 PE=1 SV=1 - [PRPTZ_MOUSE]	B9EKR1	5	3	2.16	1.38	0.999	1.076	10	1.8
815	Sodium-driven chloride bicarbonate exchanger OS=Mus musculus GN=Slc4a10 PE=1 SV=2 - [S4A10_MOUSE]	Q5DTL9	12	20	10.38	19.5	0.992	1.076	6.7	2
816	NADH dehydrogenase [ubiquinone] 1 subunit C2 OS=Mus musculus GN=Ndufc2 PE=1 SV=1 - [NDUC2_MOUSE]	Q9CQ54	4	8	29.17	48.33	0.942	1.076	0.5	2.9
817	Hypoxia up-regulated protein 1 OS=Mus musculus GN=Hyou1 PE=1 SV=1 - [HYOU1_MOUSE]	Q9JKR6	6	10	5.81	9.41	0.957	1.077	9.4	7.1
818	Syntaxin-binding protein 5-like OS=Mus musculus GN=Stxbp5l PE=2 SV=1 - [STB5L_MOUSE]	Q5DQR4	5	7	5.91	8.02	0.935	1.077	3.5	1.8
819	Contactin-1 OS=Mus musculus GN=Cntn1 PE=1 SV=1 - [CNTN1_MOUSE]	P12960	45	48	46.37	49.9	0.92	1.078	1.8	0.6
820	NADH dehydrogenase [ubiquinone] 1 beta subcomplex subunit 9 OS=Mus musculus GN=Ndufb9 PE=1 SV=3 - [NDUB9_MOUSE]	Q9CQJ8	4	6	32.96	36.31	0.963	1.078	2.2	6.4
821	Serine/threonine-protein kinase BRSK1 OS=Mus musculus GN=Brsk1 PE=1 SV=1 - [BRSK1_MOUSE]	Q5RJI5	5	8	4.76	8.87	0.97	1.078	8.9	7.9
822	Cytochrome c oxidase subunit 4 isoform 1, mitochondrial OS=Mus musculus GN=Cox4i1 PE=1 SV=2 - [COX41_MOUSE]	P19783	13	14	63.91	63.31	0.984	1.078	1.5	2.1
823	Synaptotagmin-1 OS=Mus musculus GN=Syt1 PE=1 SV=1 - [SYT1_MOUSE]	P46096	33	33	57.24	63.18	0.936	1.078	0.9	0.3
824	N(G),N(G)-dimethylarginine dimethylaminohydrolase 1 OS=Mus musculus GN=Ddah1 PE=1 SV=3 - [DDAH1_MOUSE]	Q9CWS0	7	10	28.77	35.09	1.07	1.078	5	3.2
825	Glutaredoxin-related protein 5, mitochondrial OS=Mus musculus GN=Glrx5 PE=2 SV=2 - [GLRX5_MOUSE]	Q80Y14	3	3	21.05	21.71	0.947	1.079	4	6.2
826	Neurotrimin OS=Mus musculus GN=Ntm PE=2 SV=2 - [NTRI_MOUSE]	Q99PJ0	9	9	20.35	24.42	0.929	1.079	7.3	1.7
827	F-box only protein 41 OS=Mus musculus GN=Fbxo41 PE=1 SV=3 - [FBX41_MOUSE]	Q6NS60	5	6	4.12	4.93	0.735	1.08	6.6	3.8
828	Vesicle-fusing ATPase OS=Mus musculus GN=Nsf PE=1 SV=2 - [NSF_MOUSE]	P46460	56	60	68.15	68.01	1.028	1.081	0.8	1.4
829	Glutathione S-transferase Mu 1 OS=Mus musculus GN=Gstm1 PE=1 SV=2 - [GSTM1_MOUSE]	P10649	22	19	79.36	66.06	1.019	1.081	1.2	1.6
830	Apolipoprotein O OS=Mus musculus GN=Apoo PE=2 SV=1 - [APOO_MOUSE]	Q9DCZ4	5	6	23.11	25.94	1.103	1.081	0.8	3.3
831	60S ribosomal protein L9 OS=Mus musculus GN=Rpl9 PE=2 SV=2 - [RL9_MOUSE]	P51410	5	6	15.1	22.4	1.04	1.082	5	2.7
832	Disks large homolog 4 OS=Mus musculus GN=Dlg4 PE=1 SV=1 - [DLG4_MOUSE]	Q62108	27	33	41.16	48.9	0.945	1.082	2.1	1.3
833	Mitochondrial carrier homolog 2 OS=Mus musculus GN=Mtch2 PE=1 SV=1 - [MTCH2_MOUSE]	Q791V5	6	8	19.14	29.7	0.967	1.082	2.6	8.1
834	Glycogen phosphorylase, muscle form OS=Mus musculus GN=Pygm PE=1 SV=3 - [PYGM_MOUSE]	Q9WUB3	18	19	21.38	23.87	1.124	1.082	10.4	2.5
835	Reticulocalbin-2 OS=Mus musculus GN=Rcn2 PE=2 SV=1 - [RCN2_MOUSE]	Q8BP92	9	10	37.19	31.56	0.856	1.082	8.9	3.6
836	Sideroflexin-3 OS=Mus musculus GN=Sfxn3 PE=1 SV=1 - [SFXN3_MOUSE]	Q91V61	16	13	51.4	42.99	1.065	1.083	3.4	1.5
837	Dehydrogenase/reductase SDR family member 7B OS=Mus musculus GN=Dhrs7b PE=2 SV=1 - [DRS7B_MOUSE]	Q99J47	3	3	10.53	10.53	1.05	1.083	3.9	2.6
838	Sodium/potassium-transporting ATPase subunit beta-2 OS=Mus musculus GN=Atp1b2 PE=1 SV=2 - [AT1B2_MOUSE]	P14231	6	8	25.17	32.07	0.864	1.084	2.4	2.3
839	60S ribosomal protein L10a OS=Mus musculus GN=Rpl10a PE=1 SV=3 - [RL10A_MOUSE]	P53026	6	10	25.35	30.88	1.031	1.084	1.9	2.4
840	40S ribosomal protein S7 OS=Mus musculus GN=Rps7 PE=2 SV=1 - [RS7_MOUSE]	P62082	6	5	24.74	21.65	1.126	1.084	5.7	1.4
841	Glycogen phosphorylase, brain form OS=Mus musculus GN=Pygb PE=1 SV=3 - [PYGB_MOUSE]	Q8CI94	37	36	41.87	40.57	1.015	1.084	0.4	0.4
842	Armadillo repeat-containing protein 10 OS=Mus musculus GN=Armc10 PE=1 SV=1 - [ARM10_MOUSE]	Q9D0L7	5	5	18.95	16.34	1.033	1.085	8.3	2
843	Long-chain-fatty-acid--CoA ligase 6 OS=Mus musculus GN=Acsl6 PE=2 SV=1 - [ACSL6_MOUSE]	Q91WC3	18	15	24.39	22.81	1.022	1.085	2.3	2.7
844	Ferrochelatase, mitochondrial OS=Mus musculus GN=Fech PE=1 SV=2 - [HEMH_MOUSE]	P22315	11	6	24.29	15	1.061	1.085	1.2	2.8
845	Gamma-aminobutyric acid receptor subunit beta-2 OS=Mus musculus GN=Gabrb2 PE=1 SV=2 - [GBRB2_MOUSE]	P63137	4	8	6.64	17.19	1.032	1.085	3.2	2.2
846	10 kDa heat shock protein, mitochondrial OS=Mus musculus GN=Hspe1 PE=1 SV=2 - [CH10_MOUSE]	Q64433	17	13	93.14	86.27	0.921	1.085	1.5	0.6
847	Myosin-9 OS=Mus musculus GN=Myh9 PE=1 SV=4 - [MYH9_MOUSE]	Q8VDD5	22	25	10.66	11.33	1.162	1.086	2.6	9.4
848	Amine oxidase [flavin-containing] A OS=Mus musculus GN=Maoa PE=1 SV=3 - [AOFA_MOUSE]	Q64133	14	13	25.86	22.43	1.045	1.086	3.3	1.2
849	IQ motif and SEC7 domain-containing protein 1 OS=Mus musculus GN=Iqsec1 PE=1 SV=2 - [IQEC1_MOUSE]	Q8R0S2	13	22	15.5	22.79	0.927	1.088	4.8	0.3
850	Glutamate receptor ionotropic, NMDA 2A OS=Mus musculus GN=Grin2a PE=1 SV=2 - [NMDE1_MOUSE]	P35436	6	10	4.58	8.06	0.927	1.088	1.9	6.8
851	Disks large-associated protein 4 OS=Mus musculus GN=Dlgap4 PE=1 SV=1 - [DLGP4_MOUSE]	B1AZP2	7	7	4.64	5.65	0.909	1.089	5.8	4.9
852	Calcium/calmodulin-dependent protein kinase type II subunit alpha OS=Mus musculus GN=Camk2a PE=1 SV=2 - [KCC2A_MOUSE]	P11798	38	39	56.9	62.55	0.928	1.09	3.2	1.2
853	Ig gamma-2A chain C region secreted form OS=Mus musculus PE=1 SV=1 - [GCAB_MOUSE]	P01864	2	2	7.16	4.18	1.077	1.09	4.5
854	Probable ATP-dependent RNA helicase DDX5 OS=Mus musculus GN=Ddx5 PE=1 SV=2 - [DDX5_MOUSE]	Q61656	6	11	9.28	17.75	1.058	1.09	0.8	0.6
855	60S ribosomal protein L14 OS=Mus musculus GN=Rpl14 PE=2 SV=3 - [RL14_MOUSE]	Q9CR57	7	7	24.88	21.2	0.876	1.091	3.3	2.5
856	Uncharacterized protein C19orf52 homolog OS=Mus musculus PE=2 SV=1 - [CS052_MOUSE]	Q8BGX2	6	6	18.42	18.42	1.087	1.091	5.4	2.7
857	Protein kinase C alpha type OS=Mus musculus GN=Prkca PE=1 SV=3 - [KPCA_MOUSE]	P20444	10	13	14.29	18.3	1.026	1.091	2	2.2
858	Mitochondrial import inner membrane translocase subunit TIM50 OS=Mus musculus GN=Timm50 PE=1 SV=1 - [TIM50_MOUSE]	Q9D880	6	5	17.56	15.58	1.046	1.091	10.1	5.6
859	60S ribosomal protein L8 OS=Mus musculus GN=Rpl8 PE=2 SV=2 - [RL8_MOUSE]	P62918	10	9	26.07	28.02	1.007	1.092	1.1	2.2
860	Prostamide/prostaglandin F synthase OS=Mus musculus GN=Fam213b PE=1 SV=1 - [PGFS_MOUSE]	Q9DB60	3	2	13.93	9.95	0.991	1.092	2.5	6.7
861	NADH dehydrogenase [ubiquinone] 1 beta subcomplex subunit 11, mitochondrial OS=Mus musculus GN=Ndufb11 PE=1 SV=2 - [NDUBB_MOUSE]	O09111	6	6	51.66	49.01	1.034	1.092	6.5	6.9
862	Dual specificity protein phosphatase 3 OS=Mus musculus GN=Dusp3 PE=1 SV=1 - [DUS3_MOUSE]	Q9D7X3	2	2	16.22	14.59	0.948	1.092	9.5	13.6
863	Glutamate receptor 3 OS=Mus musculus GN=Gria3 PE=1 SV=2 - [GRIA3_MOUSE]	Q9Z2W9	11	18	14.19	22.97	0.875	1.092	0.8	4.8
864	Calnexin OS=Mus musculus GN=Canx PE=1 SV=1 - [CALX_MOUSE]	P35564	17	18	25.72	30.63	1.009	1.094	1.4	2.4
865	Cytochrome c oxidase subunit 2 OS=Mus musculus GN=Mtco2 PE=1 SV=1 - [COX2_MOUSE]	P00405	7	7	30.84	30.84	0.887	1.094	1.6	2.1
866	Receptor-type tyrosine-protein phosphatase S OS=Mus musculus GN=Ptprs PE=1 SV=1 - [PTPRS_MOUSE]	B0V2N1	6	13	3.67	8.23	0.904	1.094	3	3.2
867	Heterogeneous nuclear ribonucleoproteins A2/B1 OS=Mus musculus GN=Hnrnpa2b1 PE=1 SV=2 - [ROA2_MOUSE]	O88569	6	8	16.71	22.95	1.043	1.094	3.4	3.4
868	Mitochondrial Rho GTPase 1 OS=Mus musculus GN=Rhot1 PE=2 SV=1 - [MIRO1_MOUSE]	Q8BG51	3	4	3.96	7.13	1.186	1.094	6.2	2.6
869	60S ribosomal protein L7 OS=Mus musculus GN=Rpl7 PE=2 SV=2 - [RL7_MOUSE]	P14148	9	14	28.52	41.85	0.965	1.095	3.4	3.6
870	4-trimethylaminobutyraldehyde dehydrogenase OS=Mus musculus GN=Aldh9a1 PE=1 SV=1 - [AL9A1_MOUSE]	Q9JLJ2	2	5	4.66	10.53	1.047	1.096	6.9	3.9
871	Delta-1-pyrroline-5-carboxylate dehydrogenase, mitochondrial OS=Mus musculus GN=Aldh4a1 PE=1 SV=3 - [AL4A1_MOUSE]	Q8CHT0	5	2	7.12	4.45	1.146	1.096	3.1	7.7
872	Calcium-binding mitochondrial carrier protein SCaMC-3 OS=Mus musculus GN=Slc25a23 PE=2 SV=1 - [SCMC3_MOUSE]	Q6GQS1	7	5	14.56	8.78	1.133	1.097	2.8	6.1
873	Cytochrome c1, heme protein, mitochondrial OS=Mus musculus GN=Cyc1 PE=1 SV=1 - [CY1_MOUSE]	Q9D0M3	12	11	48	32.92	1.034	1.097	0.2	3
874	Glutamate receptor ionotropic, NMDA 1 OS=Mus musculus GN=Grin1 PE=1 SV=1 - [NMDZ1_MOUSE]	P35438	21	19	20.04	16.1	0.904	1.099	2.5	0.6
875	Cytochrome b-c1 complex subunit Rieske, mitochondrial OS=Mus musculus GN=Uqcrfs1 PE=1 SV=1 - [UCRI_MOUSE]	Q9CR68	11	10	49.64	40.88	1.021	1.099	0.9	1.5
876	Monoacylglycerol lipase ABHD6 OS=Mus musculus GN=Abhd6 PE=2 SV=1 - [ABHD6_MOUSE]	Q8R2Y0	4	5	13.1	18.45	1.226	1.1	16.2	0.8
877	Citrate lyase subunit beta-like protein, mitochondrial OS=Mus musculus GN=Clybl PE=1 SV=2 - [CLYBL_MOUSE]	Q8R4N0	4	7	11.83	20.71	1.033	1.1	3.5	3.1
878	Mitochondrial pyruvate carrier 2 OS=Mus musculus GN=Mpc2 PE=1 SV=1 - [MPC2_MOUSE]	Q9D023	5	6	29.92	37.8	0.978	1.101	1	6
879	Plakophilin-4 OS=Mus musculus GN=Pkp4 PE=1 SV=1 - [PKP4_MOUSE]	Q68FH0	10	14	8.24	13.95	0.955	1.101	3	2.5
880	Neurabin-2 OS=Mus musculus GN=Ppp1r9b PE=1 SV=1 - [NEB2_MOUSE]	Q6R891	9	15	13.71	19.34	1.03	1.101	5.9	6.3
881	NADH dehydrogenase [ubiquinone] 1 beta subcomplex subunit 5, mitochondrial OS=Mus musculus GN=Ndufb5 PE=1 SV=1 - [NDUB5_MOUSE]	Q9CQH3	4	6	25.4	25.4	0.793	1.102	2.8	4
882	MOSC domain-containing protein 2, mitochondrial OS=Mus musculus GN=Marc2 PE=1 SV=1 - [MOSC2_MOUSE]	Q922Q1	8	7	15.98	14.79	1.122	1.102	3.8	8.6
883	Methylcrotonoyl-CoA carboxylase subunit alpha, mitochondrial OS=Mus musculus GN=Mccc1 PE=1 SV=2 - [MCCA_MOUSE]	Q99MR8	2	4	3.91	6.42	0.97	1.102	0.2	0.7
884	Dolichyl-diphosphooligosaccharide--protein glycosyltransferase subunit 2 OS=Mus musculus GN=Rpn2 PE=2 SV=1 - [RPN2_MOUSE]	Q9DBG6	4	8	9.03	16.01	1.055	1.103	9	3.9
885	Neural cell adhesion molecule L1-like protein OS=Mus musculus GN=Chl1 PE=1 SV=2 - [CHL1_MOUSE]	P70232	3	4	1.99	2.73	0.937	1.103	3.3
886	78 kDa glucose-regulated protein OS=Mus musculus GN=Hspa5 PE=1 SV=3 - [GRP78_MOUSE]	P20029	32	38	45.65	56.18	0.993	1.103	2.3	2
887	Cytosolic 10-formyltetrahydrofolate dehydrogenase OS=Mus musculus GN=Aldh1l1 PE=1 SV=1 - [AL1L1_MOUSE]	Q8R0Y6	8	10	9.31	10.75	1.004	1.103	1.8	6.7
888	Acyl-coenzyme A thioesterase 11 OS=Mus musculus GN=Acot11 PE=2 SV=1 - [ACO11_MOUSE]	Q8VHQ9	2	5	7.58	9.09	1.033	1.104	4.3	11
889	Fumarylacetoacetate hydrolase domain-containing protein 2A OS=Mus musculus GN=Fahd2 PE=1 SV=1 - [FAHD2_MOUSE]	Q3TC72	4	3	15.34	12.14	1.099	1.104	4.3	3.7
890	NADH dehydrogenase [ubiquinone] iron-sulfur protein 2, mitochondrial OS=Mus musculus GN=Ndufs2 PE=1 SV=1 - [NDUS2_MOUSE]	Q91WD5	24	26	60.26	66.52	1.074	1.105	1.9	0.7
891	Peroxiredoxin-5, mitochondrial OS=Mus musculus GN=Prdx5 PE=1 SV=2 - [PRDX5_MOUSE]	P99029	12	9	53.33	36.19	0.997	1.106	1.3	0.6
892	Acylglycerol kinase, mitochondrial OS=Mus musculus GN=Agk PE=1 SV=1 - [AGK_MOUSE]	Q9ESW4	4	7	9.03	15.2	1.089	1.106	3.7	3.9
893	Methylglutaconyl-CoA hydratase, mitochondrial OS=Mus musculus GN=Auh PE=1 SV=1 - [AUHM_MOUSE]	Q9JLZ3	14	14	36.94	36.94	1.001	1.106	2.4	0.7
894	Cytochrome c oxidase subunit 5B, mitochondrial OS=Mus musculus GN=Cox5b PE=1 SV=1 - [COX5B_MOUSE]	P19536	6	7	35.94	35.94	0.874	1.106	3.3	1
895	NADH dehydrogenase [ubiquinone] iron-sulfur protein 4, mitochondrial OS=Mus musculus GN=Ndufs4 PE=1 SV=3 - [NDUS4_MOUSE]	Q9CXZ1	9	9	38.29	39.43	0.877	1.106	5.2	2.3
896	3-hydroxyacyl-CoA dehydrogenase type-2 OS=Mus musculus GN=Hsd17b10 PE=1 SV=4 - [HCD2_MOUSE]	O08756	6	8	33.72	34.87	1.017	1.107	4.1	2.1
897	Nucleobindin-1 OS=Mus musculus GN=Nucb1 PE=1 SV=2 - [NUCB1_MOUSE]	Q02819	5	10	11.33	25.71	1.017	1.107	1.6	2.9
898	60S ribosomal protein L31 OS=Mus musculus GN=Rpl31 PE=2 SV=1 - [RL31_MOUSE]	P62900	7	4	38.4	23.2	0.945	1.107	1.7	4.1
899	Disks large-associated protein 1 OS=Mus musculus GN=Dlgap1 PE=1 SV=3 - [DLGP1_MOUSE]	Q9D415	9	12	6.85	11.29	0.969	1.108	5.4	2.2
900	NADP-dependent malic enzyme, mitochondrial OS=Mus musculus GN=Me3 PE=1 SV=2 - [MAON_MOUSE]	Q8BMF3	9	8	15.56	14.24	1.05	1.109	2.4	3.9
901	60S acidic ribosomal protein P0 OS=Mus musculus GN=Rplp0 PE=1 SV=3 - [RLA0_MOUSE]	P14869	3	7	9.46	27.13	1.065	1.109	3.3	3.4
902	40S ribosomal protein S9 OS=Mus musculus GN=Rps9 PE=2 SV=3 - [RS9_MOUSE]	Q6ZWN5	6	12	22.68	45.36	0.97	1.11	7.3	3.7
903	NADH dehydrogenase [ubiquinone] 1 alpha subcomplex subunit 12 OS=Mus musculus GN=Ndufa12 PE=2 SV=2 - [NDUAC_MOUSE]	Q7TMF3	5	8	41.38	62.76	1.134	1.11	4.1	1.4
904	60S ribosomal protein L35 OS=Mus musculus GN=Rpl35 PE=2 SV=1 - [RL35_MOUSE]	Q6ZWV7	4	5	32.52	30.08	1.014	1.111	3.3	9.3
905	Gamma-aminobutyric acid receptor subunit alpha-1 OS=Mus musculus GN=Gabra1 PE=1 SV=1 - [GBRA1_MOUSE]	P62812	9	13	19.78	23.74	0.906	1.111	1.3	2.1
906	Apoptosis-inducing factor 1, mitochondrial OS=Mus musculus GN=Aifm1 PE=1 SV=1 - [AIFM1_MOUSE]	Q9Z0X1	13	8	23.86	12.58	1.067	1.111	1	6.6
907	40S ribosomal protein S15a OS=Mus musculus GN=Rps15a PE=2 SV=2 - [RS15A_MOUSE]	P62245	4	6	23.08	34.62	0.998	1.113	5.1	2.5
908	Glutamate receptor ionotropic, NMDA 2B OS=Mus musculus GN=Grin2b PE=1 SV=3 - [NMDE2_MOUSE]	Q01097	12	14	7.49	8.5	0.877	1.114	2.8	3.5
909	Solute carrier family 25 member 51 OS=Mus musculus GN=Slc25a51 PE=2 SV=1 - [S2551_MOUSE]	Q5HZI9	4	2	10.74	8.72	1.123	1.114	18.3	5.7
910	Thioredoxin-dependent peroxide reductase, mitochondrial OS=Mus musculus GN=Prdx3 PE=1 SV=1 - [PRDX3_MOUSE]	P20108	10	9	33.85	29.57	1.091	1.118	4.1	1.9
911	60S ribosomal protein L18a OS=Mus musculus GN=Rpl18a PE=2 SV=1 - [RL18A_MOUSE]	P62717	3	4	14.77	19.32	0.953	1.118	7.5	7.4
912	Mitochondrial 2-oxoglutarate/malate carrier protein OS=Mus musculus GN=Slc25a11 PE=1 SV=3 - [M2OM_MOUSE]	Q9CR62	20	18	68.15	60.83	1.109	1.118	0.5	1.6
913	Creatine kinase U-type, mitochondrial OS=Mus musculus GN=Ckmt1 PE=1 SV=1 - [KCRU_MOUSE]	P30275	21	23	48.8	52.87	1.113	1.118	2.2	1.5
914	Synaptosomal-associated protein 47 OS=Mus musculus GN=Snap47 PE=1 SV=1 - [SNP47_MOUSE]	Q8R570	7	8	27.6	28.57	1.036	1.119	3.3	2
915	40S ribosomal protein S8 OS=Mus musculus GN=Rps8 PE=2 SV=2 - [RS8_MOUSE]	P62242	2	5	13.46	25	0.998	1.119	0.1	4.2
916	60S ribosomal protein L13a OS=Mus musculus GN=Rpl13a PE=1 SV=4 - [RL13A_MOUSE]	P19253	3	8	10.84	26.11	0.962	1.12	1.9	0.8
917	NADH dehydrogenase [ubiquinone] 1 beta subcomplex subunit 10 OS=Mus musculus GN=Ndufb10 PE=1 SV=3 - [NDUBA_MOUSE]	Q9DCS9	7	8	43.75	52.27	1.078	1.12	3.2	2.3
918	Transmembrane protein 65 OS=Mus musculus GN=Tmem65 PE=2 SV=1 - [TMM65_MOUSE]	Q4VAE3	3	3	14.1	15.38	0.977	1.123	3.1	3.5
919	40S ribosomal protein S2 OS=Mus musculus GN=Rps2 PE=2 SV=3 - [RS2_MOUSE]	P25444	8	10	24.23	28.67	1.003	1.123	4	1.1
920	3-ketoacyl-CoA thiolase, mitochondrial OS=Mus musculus GN=Acaa2 PE=1 SV=3 - [THIM_MOUSE]	Q8BWT1	10	8	27.2	21.16	1.069	1.123	1.5	11.5
921	Acyl-CoA dehydrogenase family member 9, mitochondrial OS=Mus musculus GN=Acad9 PE=1 SV=2 - [ACAD9_MOUSE]	Q8JZN5	8	9	12.48	12.96	1.051	1.124	2.7	2.8
922	Solute carrier family 25 member 46 OS=Mus musculus GN=Slc25a46 PE=1 SV=1 - [S2546_MOUSE]	Q9CQS4	6	4	13.4	8.37	1.071	1.124	7	0.7
923	60S ribosomal protein L3 OS=Mus musculus GN=Rpl3 PE=1 SV=3 - [RL3_MOUSE]	P27659	7	9	11.91	15.14	0.935	1.125	2.6	2.5
924	Isocitrate dehydrogenase [NAD] subunit gamma 1, mitochondrial OS=Mus musculus GN=Idh3g PE=1 SV=1 - [IDHG1_MOUSE]	P70404	19	13	42.49	32.82	1.095	1.125	2	3.4
925	ATP-dependent (S)-NAD(P)H-hydrate dehydratase OS=Mus musculus GN=Carkd PE=1 SV=1 - [NNRD_MOUSE]	Q9CZ42	3	3	5.54	10.79	1.069	1.125	2.7	2.9
926	Protein kinase C gamma type OS=Mus musculus GN=Prkcg PE=1 SV=1 - [KPCG_MOUSE]	P63318	27	24	37.02	35.58	0.926	1.126	0.7	1.1
927	Ganglioside-induced differentiation-associated protein 1 OS=Mus musculus GN=Gdap1 PE=1 SV=1 - [GDAP1_MOUSE]	O88741	11	14	26.82	30.17	1.047	1.126	1.7	0.7
928	Fatty-acid amide hydrolase 1 OS=Mus musculus GN=Faah PE=2 SV=1 - [FAAH1_MOUSE]	O08914	4	6	7.6	12.44	1.042	1.127	1.4	9.7
929	ATP-dependent RNA helicase DDX3Y OS=Mus musculus GN=Ddx3y PE=1 SV=2 - [DDX3Y_MOUSE]	Q62095	2	4	3.5	6.69	0.997	1.127	48.4	2.1
930	Cytochrome b-c1 complex subunit 2, mitochondrial OS=Mus musculus GN=Uqcrc2 PE=1 SV=1 - [QCR2_MOUSE]	Q9DB77	26	27	64.24	64.46	1.065	1.128	0.9	0.9
931	60S ribosomal protein L18 OS=Mus musculus GN=Rpl18 PE=2 SV=3 - [RL18_MOUSE]	P35980	3	6	14.89	33.51	0.934	1.129	0.8	0.6
932	Glutamate receptor 2 OS=Mus musculus GN=Gria2 PE=1 SV=3 - [GRIA2_MOUSE]	P23819	24	35	28.77	44.62	0.911	1.129	0.6	0.8
933	Sorting and assembly machinery component 50 homolog OS=Mus musculus GN=Samm50 PE=1 SV=1 - [SAM50_MOUSE]	Q8BGH2	13	10	25.16	20.47	1.044	1.129	2	7.3
934	40S ribosomal protein S4, X isoform OS=Mus musculus GN=Rps4x PE=2 SV=2 - [RS4X_MOUSE]	P62702	9	11	28.14	33.46	0.941	1.13	7.7	1.4
935	Valacyclovir hydrolase OS=Mus musculus GN=Bphl PE=1 SV=1 - [BPHL_MOUSE]	Q8R164	10	9	35.05	28.52	1.082	1.13	2	5
936	Cytochrome c oxidase subunit 6A1, mitochondrial OS=Mus musculus GN=Cox6a1 PE=1 SV=2 - [CX6A1_MOUSE]	P43024	2	3	45.05	59.46	1.022	1.13	2.9	3
937	Mitochondrial glutamate carrier 1 OS=Mus musculus GN=Slc25a22 PE=1 SV=1 - [GHC1_MOUSE]	Q9D6M3	16	17	56.97	56.97	1.109	1.131	2	4.7
938	NAD(P) transhydrogenase, mitochondrial OS=Mus musculus GN=Nnt PE=1 SV=2 - [NNTM_MOUSE]	Q61941	12	3	10.59	2.58	1.046	1.131	2.3	1.1
939	60S ribosomal protein L15 OS=Mus musculus GN=Rpl15 PE=2 SV=4 - [RL15_MOUSE]	Q9CZM2	6	7	27.45	34.31	0.972	1.132	9.5	2.6
940	Protein NipSnap homolog 3B OS=Mus musculus GN=Nipsnap3b PE=2 SV=1 - [NPS3B_MOUSE]	Q9CQE1	4	4	12.96	15.38	1.104	1.132	1.7	2.6
941	ATP synthase F(0) complex subunit B1, mitochondrial OS=Mus musculus GN=Atp5f1 PE=1 SV=1 - [AT5F1_MOUSE]	Q9CQQ7	17	14	42.19	38.28	0.932	1.132	1.8	3.9
942	Monofunctional C1-tetrahydrofolate synthase, mitochondrial OS=Mus musculus GN=Mthfd1l PE=1 SV=2 - [C1TM_MOUSE]	Q3V3R1	8	6	8.8	6.96	1.062	1.132	5.5	4.6
943	NADH dehydrogenase [ubiquinone] 1 alpha subcomplex subunit 7 OS=Mus musculus GN=Ndufa7 PE=1 SV=3 - [NDUA7_MOUSE]	Q9Z1P6	11	11	61.95	74.34	1.058	1.134	1.6	3.3
944	Glutaminase kidney isoform, mitochondrial OS=Mus musculus GN=Gls PE=1 SV=1 - [GLSK_MOUSE]	D3Z7P3	35	26	54.6	43.18	1.095	1.134	2	1.1
945	Gamma-aminobutyric acid receptor subunit gamma-2 OS=Mus musculus GN=Gabrg2 PE=1 SV=3 - [GBRG2_MOUSE]	P22723	4	7	9.28	13.5	0.931	1.136	6.2	6.9
946	Calcium uptake protein 3, mitochondrial OS=Mus musculus GN=Micu3 PE=2 SV=2 - [MICU3_MOUSE]	Q9CTY5	5	5	8.41	9.56	1.06	1.136	4.2	4.7
947	NADH dehydrogenase [ubiquinone] 1 alpha subcomplex subunit 3 OS=Mus musculus GN=Ndufa3 PE=1 SV=1 - [NDUA3_MOUSE]	Q9CQ91	3	3	57.14	57.14	0.897	1.136	1.9	3.2
948	Enoyl-CoA hydratase, mitochondrial OS=Mus musculus GN=Echs1 PE=1 SV=1 - [ECHM_MOUSE]	Q8BH95	11	10	36.55	35.52	1.08	1.136	1	2.7
949	Inorganic pyrophosphatase 2, mitochondrial OS=Mus musculus GN=Ppa2 PE=1 SV=1 - [IPYR2_MOUSE]	Q91VM9	4	3	14.85	13.33	1.172	1.137	7.6	4
950	Adenylate kinase isoenzyme 5 OS=Mus musculus GN=Ak5 PE=2 SV=2 - [KAD5_MOUSE]	Q920P5	3	7	6.05	12.63	1.102	1.137		3.4
951	ATPase family AAA domain-containing protein 3 OS=Mus musculus GN=Atad3 PE=1 SV=1 - [ATAD3_MOUSE]	Q925I1	6	13	11.68	21.49	1.027	1.138	3.4	1.9
952	60S ribosomal protein L23a OS=Mus musculus GN=Rpl23a PE=1 SV=1 - [RL23A_MOUSE]	P62751	6	9	30.77	44.23	1.211	1.139	12.6	2.9
953	Pyruvate carboxylase, mitochondrial OS=Mus musculus GN=Pc PE=1 SV=1 - [PYC_MOUSE]	Q05920	34	29	30.98	25.3	1.08	1.139	2.6	3
954	Metabotropic glutamate receptor 2 OS=Mus musculus GN=Grm2 PE=1 SV=2 - [GRM2_MOUSE]	Q14BI2	6	7	6.54	7.57	0.902	1.139	3.1	3.4
955	ADP/ATP translocase 2 OS=Mus musculus GN=Slc25a5 PE=1 SV=3 - [ADT2_MOUSE]	P51881	21	19	54.03	48.32	1.107	1.139	2.3	1.5
956	Caskin-1 OS=Mus musculus GN=Caskin1 PE=1 SV=2 - [CSKI1_MOUSE]	Q6P9K8	12	11	12.3	10.48	1.073	1.139	4	3.9
957	Succinyl-CoA ligase [ADP/GDP-forming] subunit alpha, mitochondrial OS=Mus musculus GN=Suclg1 PE=1 SV=4 - [SUCA_MOUSE]	Q9WUM5	13	10	32.37	24.57	1.036	1.14	1.9	3.4
958	ADP/ATP translocase 1 OS=Mus musculus GN=Slc25a4 PE=1 SV=4 - [ADT1_MOUSE]	P48962	22	22	61.07	61.74	1.124	1.14	1.3	2.5
959	Neural cell adhesion molecule L1 OS=Mus musculus GN=L1cam PE=1 SV=1 - [L1CAM_MOUSE]	P11627	8	13	5.48	10.48	0.933	1.14	3.6	3.1
960	Complement component 1 Q subcomponent-binding protein, mitochondrial OS=Mus musculus GN=C1qbp PE=1 SV=1 - [C1QBP_MOUSE]	O35658	3	6	16.91	37.05	0.946	1.141	2.7	6.2
961	D-beta-hydroxybutyrate dehydrogenase, mitochondrial OS=Mus musculus GN=Bdh1 PE=1 SV=2 - [BDH_MOUSE]	Q80XN0	13	9	34.69	25.66	1.102	1.141	1.7	3.3
962	Histidine triad nucleotide-binding protein 2, mitochondrial OS=Mus musculus GN=Hint2 PE=1 SV=1 - [HINT2_MOUSE]	Q9D0S9	5	6	39.26	39.26	1.045	1.141	7.9	1.7
963	Solute carrier family 12 member 5 OS=Mus musculus GN=Slc12a5 PE=1 SV=2 - [S12A5_MOUSE]	Q91V14	29	34	23.11	26.89	0.976	1.141	1.1	0.5
964	LETM1 and EF-hand domain-containing protein 1, mitochondrial OS=Mus musculus GN=Letm1 PE=2 SV=1 - [LETM1_MOUSE]	Q9Z2I0	19	18	27.37	28.32	1.069	1.141	3	1.8
965	Electron transfer flavoprotein-ubiquinone oxidoreductase, mitochondrial OS=Mus musculus GN=Etfdh PE=1 SV=1 - [ETFD_MOUSE]	Q921G7	12	8	17.37	13.31	1.092	1.141	0.8	2
966	NADH dehydrogenase [ubiquinone] iron-sulfur protein 3, mitochondrial OS=Mus musculus GN=Ndufs3 PE=1 SV=2 - [NDUS3_MOUSE]	Q9DCT2	16	17	61.6	58.56	1.042	1.142	2.1	3.1
967	NADH dehydrogenase [ubiquinone] iron-sulfur protein 5 OS=Mus musculus GN=Ndufs5 PE=1 SV=3 - [NDUS5_MOUSE]	Q99LY9	6	2	37.74	17.92	0.862	1.142	8	11.1
968	Prohibitin-2 OS=Mus musculus GN=Phb2 PE=1 SV=1 - [PHB2_MOUSE]	O35129	26	25	79.93	77.26	1.044	1.143	1.5	1.5
969	Dihydrolipoyllysine-residue acetyltransferase component of pyruvate dehydrogenase complex, mitochondrial OS=Mus musculus GN=Dlat PE=1 SV=2 - [ODP2_MOUSE]	Q8BMF4	20	18	33.33	31.62	1.121	1.145	2.1	1.6
970	60S ribosomal protein L11 OS=Mus musculus GN=Rpl11 PE=1 SV=4 - [RL11_MOUSE]	Q9CXW4	4	5	17.98	23.03	1.069	1.146	2.7	2.4
971	Voltage-dependent anion-selective channel protein 3 OS=Mus musculus GN=Vdac3 PE=1 SV=1 - [VDAC3_MOUSE]	Q60931	14	13	44.88	39.58	0.953	1.146	2.2	0.7
972	Mitochondrial fission regulator 1-like OS=Mus musculus GN=Mtfr1l PE=1 SV=1 - [MFR1L_MOUSE]	Q9CWE0	3	4	11.76	14.88	0.988	1.147	11.9	3.7
973	Calcium uptake protein 1, mitochondrial OS=Mus musculus GN=Micu1 PE=1 SV=1 - [MICU1_MOUSE]	Q8VCX5	3	3	8.81	5.87	1.093	1.147	5.2	3.2
974	Dolichyl-diphosphooligosaccharide--protein glycosyltransferase subunit 1 OS=Mus musculus GN=Rpn1 PE=2 SV=1 - [RPN1_MOUSE]	Q91YQ5	9	13	15.63	19.08	1.009	1.148	3.2	3.1
975	Amine oxidase [flavin-containing] B OS=Mus musculus GN=Maob PE=1 SV=4 - [AOFB_MOUSE]	Q8BW75	12	11	21.15	18.27	1.028	1.148	2.6	7.3
976	Voltage-dependent anion-selective channel protein 1 OS=Mus musculus GN=Vdac1 PE=1 SV=3 - [VDAC1_MOUSE]	Q60932	21	20	73.99	71.96	0.905	1.148	1.3	0.3
977	60S ribosomal protein L24 OS=Mus musculus GN=Rpl24 PE=2 SV=2 - [RL24_MOUSE]	Q8BP67	6	6	24.84	29.3	0.99	1.148	6.5	4.6
978	[Pyruvate dehydrogenase (acetyl-transferring)] kinase isozyme 3, mitochondrial OS=Mus musculus GN=Pdk3 PE=2 SV=1 - [PDK3_MOUSE]	Q922H2	6	5	12.53	13.73	1.086	1.149	1.7	4.5
979	Alpha-aminoadipic semialdehyde dehydrogenase OS=Mus musculus GN=Aldh7a1 PE=1 SV=4 - [AL7A1_MOUSE]	Q9DBF1	10	9	20.41	16.7	1.112	1.149	1.7	5
980	Metaxin-1 OS=Mus musculus GN=Mtx1 PE=1 SV=1 - [MTX1_MOUSE]	P47802	2	6	7.89	23.34	1.123	1.149	8.9	0.7
981	Dynamin-like 120 kDa protein, mitochondrial OS=Mus musculus GN=Opa1 PE=1 SV=1 - [OPA1_MOUSE]	P58281	37	35	44.48	38.96	1.06	1.15	2.7	2.1
982	Prohibitin OS=Mus musculus GN=Phb PE=1 SV=1 - [PHB_MOUSE]	P67778	19	18	66.18	64.34	0.991	1.151	1.1	3.5
983	Heat shock protein 75 kDa, mitochondrial OS=Mus musculus GN=Trap1 PE=1 SV=1 - [TRAP1_MOUSE]	Q9CQN1	6	5	8.78	5.81	1.051	1.152	5.8	7.5
984	Phosphate carrier protein, mitochondrial OS=Mus musculus GN=Slc25a3 PE=1 SV=1 - [MPCP_MOUSE]	Q8VEM8	19	17	40.06	41.18	1.094	1.153	2.7	1.1
985	Propionyl-CoA carboxylase alpha chain, mitochondrial OS=Mus musculus GN=Pcca PE=1 SV=2 - [PCCA_MOUSE]	Q91ZA3	22	14	33.01	20.03	1.115	1.155	5.4	1.2
986	Hexokinase-1 OS=Mus musculus GN=Hk1 PE=1 SV=3 - [HXK1_MOUSE]	P17710	52	54	43.22	42.92	1.185	1.155	0.9	1.2
987	NADH dehydrogenase [ubiquinone] iron-sulfur protein 8, mitochondrial OS=Mus musculus GN=Ndufs8 PE=1 SV=1 - [NDUS8_MOUSE]	Q8K3J1	9	6	29.72	26.42	0.881	1.156	2.7	1.9
988	Protein unc-13 homolog A OS=Mus musculus GN=Unc13a PE=1 SV=3 - [UN13A_MOUSE]	Q4KUS2	7	7	3.86	4.5	0.991	1.156	7.9	8.2
989	Leucine-rich PPR motif-containing protein, mitochondrial OS=Mus musculus GN=Lrpprc PE=1 SV=2 - [LPPRC_MOUSE]	Q6PB66	28	21	16.81	13.79	1.112	1.158	1.8	3.6
990	Succinyl-CoA ligase [ADP-forming] subunit beta, mitochondrial OS=Mus musculus GN=Sucla2 PE=1 SV=2 - [SUCB1_MOUSE]	Q9Z2I9	23	26	38.23	45.14	1.08	1.159	0.8	3.3
991	Voltage-dependent anion-selective channel protein 2 OS=Mus musculus GN=Vdac2 PE=1 SV=2 - [VDAC2_MOUSE]	Q60930	12	11	36.61	33.56	0.893	1.161	2.6	0.9
992	Succinate dehydrogenase [ubiquinone] iron-sulfur subunit, mitochondrial OS=Mus musculus GN=Sdhb PE=1 SV=1 - [DHSB_MOUSE]	Q9CQA3	16	17	47.87	43.62	1.109	1.162	1.3	0.6
993	ATP synthase subunit O, mitochondrial OS=Mus musculus GN=Atp5o PE=1 SV=1 - [ATPO_MOUSE]	Q9DB20	15	12	53.99	46.48	1.057	1.162	1.1	1
994	NADH dehydrogenase [ubiquinone] 1 alpha subcomplex subunit 5 OS=Mus musculus GN=Ndufa5 PE=1 SV=3 - [NDUA5_MOUSE]	Q9CPP6	7	8	61.21	65.52	0.927	1.163	2.5	0.6
995	Redox-regulatory protein FAM213A OS=Mus musculus GN=Fam213a PE=1 SV=2 - [F213A_MOUSE]	Q9CYH2	8	8	35.32	34.86	1.112	1.163	1.4	2.2
996	Glycerol kinase OS=Mus musculus GN=Gk PE=2 SV=2 - [GLPK_MOUSE]	Q64516	11	8	20.93	13.6	1.075	1.163	0.5	4.5
997	Glycerol-3-phosphate dehydrogenase, mitochondrial OS=Mus musculus GN=Gpd2 PE=1 SV=2 - [GPDM_MOUSE]	Q64521	34	33	48.42	48.42	1.049	1.164	1.5	1.2
998	NADH dehydrogenase [ubiquinone] 1 alpha subcomplex subunit 13 OS=Mus musculus GN=Ndufa13 PE=1 SV=3 - [NDUAD_MOUSE]	Q9ERS2	10	7	52.08	50	1.052	1.164	0.5	1.3
999	Pyruvate dehydrogenase protein X component, mitochondrial OS=Mus musculus GN=Pdhx PE=2 SV=1 - [ODPX_MOUSE]	Q8BKZ9	17	13	29.34	24.15	1.047	1.165	0.2	2.3
1000	Sideroflexin-1 OS=Mus musculus GN=Sfxn1 PE=1 SV=3 - [SFXN1_MOUSE]	Q99JR1	12	8	38.82	27.95	1.061	1.165	2.5	2.8
1001	Coiled-coil-helix-coiled-coil-helix domain-containing protein 3, mitochondrial OS=Mus musculus GN=Chchd3 PE=1 SV=1 - [CHCH3_MOUSE]	Q9CRB9	12	11	33.92	35.68	0.923	1.165	2.9	2.2
1002	Aldehyde dehydrogenase X, mitochondrial OS=Mus musculus GN=Aldh1b1 PE=1 SV=1 - [AL1B1_MOUSE]	Q9CZS1	10	9	14.84	12.33	1.062	1.166	3.9	9.9
1003	Inactive hydroxysteroid dehydrogenase-like protein 1 OS=Mus musculus GN=Hsdl1 PE=2 SV=1 - [HSDL1_MOUSE]	Q8BTX9	3	2	9.09	8.18	1.039	1.166	2.4
1004	Calcium uniporter protein, mitochondrial OS=Mus musculus GN=Mcu PE=1 SV=2 - [MCU_MOUSE]	Q3UMR5	8	11	21.71	29.14	1.01	1.166	3.4	3.7
1005	Protein NipSnap homolog 2 OS=Mus musculus GN=Gbas PE=2 SV=1 - [NIPS2_MOUSE]	O55126	13	10	40.21	37.01	1.029	1.169	0.7	5.9
1006	60S ribosomal protein L27a OS=Mus musculus GN=Rpl27a PE=2 SV=5 - [RL27A_MOUSE]	P14115	3	2	19.59	12.16	0.975	1.17	1.6	13.2
1007	Carbonyl reductase family member 4 OS=Mus musculus GN=Cbr4 PE=1 SV=2 - [CBR4_MOUSE]	Q91VT4	2	2	11.02	11.02	1.144	1.17	10.9	12.3
1008	NADH dehydrogenase [ubiquinone] 1 alpha subcomplex subunit 9, mitochondrial OS=Mus musculus GN=Ndufa9 PE=1 SV=2 - [NDUA9_MOUSE]	Q9DC69	24	22	61.8	50.13	1.101	1.17	0.9	4.5
1009	60S ribosomal protein L6 OS=Mus musculus GN=Rpl6 PE=1 SV=3 - [RL6_MOUSE]	P47911	9	12	23.65	31.08	0.865	1.171	1.8	2.9
1010	ATP synthase subunit gamma, mitochondrial OS=Mus musculus GN=Atp5c1 PE=1 SV=1 - [ATPG_MOUSE]	Q91VR2	22	19	58.39	58.05	1.059	1.171	1.2	2.2
1011	Epimerase family protein SDR39U1 OS=Mus musculus GN=Sdr39u1 PE=2 SV=1 - [D39U1_MOUSE]	Q5M8N4	5	3	15.91	11.36	1.047	1.172	1.4	3.9
1012	Elongation factor Tu, mitochondrial OS=Mus musculus GN=Tufm PE=1 SV=1 - [EFTU_MOUSE]	Q8BFR5	20	21	46.68	51.99	1.063	1.172	1.6	1.6
1013	Peptidyl-prolyl cis-trans isomerase F, mitochondrial OS=Mus musculus GN=Ppif PE=1 SV=1 - [PPIF_MOUSE]	Q99KR7	6	5	19.42	16.5	1.012	1.173	3.3	7.9
1014	Phosphatidylinositol transfer protein alpha isoform OS=Mus musculus GN=Pitpna PE=1 SV=2 - [PIPNA_MOUSE]	P53810	2	6	7.38	23.62	1.271	1.173	0.9	16.6
1015	60S ribosomal protein L4 OS=Mus musculus GN=Rpl4 PE=1 SV=3 - [RL4_MOUSE]	Q9D8E6	6	12	11.46	23.39	1.024	1.175	3.4	3.8
1016	Trifunctional enzyme subunit beta, mitochondrial OS=Mus musculus GN=Hadhb PE=1 SV=1 - [ECHB_MOUSE]	Q99JY0	14	14	32.84	28.63	1.135	1.175	1.7	1.4
1017	Citrate synthase, mitochondrial OS=Mus musculus GN=Cs PE=1 SV=1 - [CISY_MOUSE]	Q9CZU6	23	23	52.8	48.92	1.131	1.175	1.2	2.1
1018	Protein QIL1 OS=Mus musculus GN=Qil1 PE=2 SV=1 - [QIL1_MOUSE]	Q8R404	5	2	42.86	21.85	0.99	1.177	0.9	8
1019	Phosphoenolpyruvate carboxykinase [GTP], mitochondrial OS=Mus musculus GN=Pck2 PE=2 SV=1 - [PCKGM_MOUSE]	Q8BH04	10	7	18.59	11.72	1.101	1.177	6.5	7.5
1020	Lamin-B2 OS=Mus musculus GN=Lmnb2 PE=1 SV=2 - [LMNB2_MOUSE]	P21619	14	13	23.15	20.64	1.047	1.178	1.7	4.2
1021	NADH dehydrogenase [ubiquinone] 1 alpha subcomplex subunit 4 OS=Mus musculus GN=Ndufa4 PE=1 SV=2 - [NDUA4_MOUSE]	Q62425	8	7	56.1	56.1	0.94	1.179	3.8	2.1
1022	60 kDa heat shock protein, mitochondrial OS=Mus musculus GN=Hspd1 PE=1 SV=1 - [CH60_MOUSE]	P63038	43	35	70.86	66.84	1.117	1.18	0.5	1.2
1023	Calcium-binding mitochondrial carrier protein Aralar1 OS=Mus musculus GN=Slc25a12 PE=1 SV=1 - [CMC1_MOUSE]	Q8BH59	34	30	64.25	49.19	1.061	1.18	0.6	2
1024	Lipoamide acyltransferase component of branched-chain alpha-keto acid dehydrogenase complex, mitochondrial OS=Mus musculus GN=Dbt PE=1 SV=2 - [ODB2_MOUSE]	P53395	2	4	4.98	8.09	1.095	1.181		2.8
1025	NADH dehydrogenase [ubiquinone] iron-sulfur protein 7, mitochondrial OS=Mus musculus GN=Ndufs7 PE=1 SV=1 - [NDUS7_MOUSE]	Q9DC70	8	8	26.79	29.46	1.087	1.183	2.2	2.3
1026	Mitochondrial fission factor OS=Mus musculus GN=Mff PE=1 SV=1 - [MFF_MOUSE]	Q6PCP5	2	2	16.15	13.06	1.086	1.184	3.8	3.9
1027	NADH-ubiquinone oxidoreductase 75 kDa subunit, mitochondrial OS=Mus musculus GN=Ndufs1 PE=1 SV=2 - [NDUS1_MOUSE]	Q91VD9	38	38	48.14	50.34	1.085	1.185	1	1.9
1028	Propionyl-CoA carboxylase beta chain, mitochondrial OS=Mus musculus GN=Pccb PE=1 SV=2 - [PCCB_MOUSE]	Q99MN9	12	7	30.68	14.6	1.066	1.185	1.8	3.4
1029	Fumarate hydratase, mitochondrial OS=Mus musculus GN=Fh PE=1 SV=3 - [FUMH_MOUSE]	P97807	28	27	57.4	59.17	1.119	1.186	1.3	1.5
1030	Electron transfer flavoprotein subunit beta OS=Mus musculus GN=Etfb PE=1 SV=3 - [ETFB_MOUSE]	Q9DCW4	9	10	34.51	34.9	1.039	1.187	5.4	5.1
1031	Isocitrate dehydrogenase [NAD] subunit alpha, mitochondrial OS=Mus musculus GN=Idh3a PE=1 SV=1 - [IDH3A_MOUSE]	Q9D6R2	19	17	45.08	40.98	1.086	1.187	1.5	3.1
1032	Cytochrome b-c1 complex subunit 7 OS=Mus musculus GN=Uqcrb PE=1 SV=3 - [QCR7_MOUSE]	Q9D855	11	10	61.26	72.97	0.896	1.189	2.7	2.5
1033	Transcription factor A, mitochondrial OS=Mus musculus GN=Tfam PE=1 SV=2 - [TFAM_MOUSE]	P40630	8	8	32.1	29.63	0.906	1.19	1.5	5.4
1034	Centromere protein V OS=Mus musculus GN=Cenpv PE=2 SV=2 - [CENPV_MOUSE]	Q9CXS4	5	2	22.62	8.73	1.047	1.19	1.2	4.6
1035	AFG3-like protein 2 OS=Mus musculus GN=Afg3l2 PE=1 SV=1 - [AFG32_MOUSE]	Q8JZQ2	12	11	12.84	11.1	1.077	1.191	1.7	4.3
1036	Lon protease homolog, mitochondrial OS=Mus musculus GN=Lonp1 PE=1 SV=2 - [LONM_MOUSE]	Q8CGK3	16	18	14.65	19.6	1.131	1.191	5.5	2.8
1037	Cytochrome c, somatic OS=Mus musculus GN=Cycs PE=1 SV=2 - [CYC_MOUSE]	P62897	14	15	69.52	71.43	1.124	1.192	2.7	0.6
1038	NADH dehydrogenase [ubiquinone] 1 alpha subcomplex subunit 10, mitochondrial OS=Mus musculus GN=Ndufa10 PE=1 SV=1 - [NDUAA_MOUSE]	Q99LC3	18	16	46.48	41.13	1.141	1.192	2.5	1
1039	Mitochondrial import inner membrane translocase subunit Tim10 OS=Mus musculus GN=Timm10 PE=1 SV=1 - [TIM10_MOUSE]	P62073	4	3	32.22	24.44	0.896	1.193	20.5	2.7
1040	ATP synthase subunit beta, mitochondrial OS=Mus musculus GN=Atp5b PE=1 SV=2 - [ATPB_MOUSE]	P56480	38	34	85.07	82.99	1.09	1.193	0.7	0.8
1041	Dihydrolipoyl dehydrogenase, mitochondrial OS=Mus musculus GN=Dld PE=1 SV=2 - [DLDH_MOUSE]	O08749	25	25	41.26	43.61	1.062	1.193	2.4	1.8
1042	Sideroflexin-5 OS=Mus musculus GN=Sfxn5 PE=1 SV=2 - [SFXN5_MOUSE]	Q925N0	11	10	30.7	22.51	1.064	1.193	2.3	3
1043	GTP:AMP phosphotransferase AK3, mitochondrial OS=Mus musculus GN=Ak3 PE=1 SV=3 - [KAD3_MOUSE]	Q9WTP7	9	12	37.44	51.98	1.043	1.194	4.9	4.1
1044	Malate dehydrogenase, mitochondrial OS=Mus musculus GN=Mdh2 PE=1 SV=3 - [MDHM_MOUSE]	P08249	24	19	61.54	60.65	1.148	1.195	0.9	1.5
1045	NADH dehydrogenase [ubiquinone] 1 beta subcomplex subunit 3 OS=Mus musculus GN=Ndufb3 PE=1 SV=1 - [NDUB3_MOUSE]	Q9CQZ6	5	4	25.96	25.96	1.016	1.196	6.7	3
1046	Putative ATP-dependent Clp protease proteolytic subunit, mitochondrial OS=Mus musculus GN=Clpp PE=1 SV=1 - [CLPP_MOUSE]	O88696	3	3	13.6	13.97	1.077	1.199	3.1	2.4
1047	NADH dehydrogenase [ubiquinone] 1 alpha subcomplex subunit 6 OS=Mus musculus GN=Ndufa6 PE=1 SV=1 - [NDUA6_MOUSE]	Q9CQZ5	9	7	56.49	51.15	1.017	1.199	2.8	1.4
1048	Succinate-semialdehyde dehydrogenase, mitochondrial OS=Mus musculus GN=Aldh5a1 PE=1 SV=1 - [SSDH_MOUSE]	Q8BWF0	21	16	39.2	28.49	1.116	1.2	2.3	2.6
1049	Isoleucine--tRNA ligase, mitochondrial OS=Mus musculus GN=Iars2 PE=1 SV=1 - [SYIM_MOUSE]	Q8BIJ6	9	10	10.08	11.17	1.086	1.201	5.1	1.3
1050	Pyruvate dehydrogenase E1 component subunit alpha, somatic form, mitochondrial OS=Mus musculus GN=Pdha1 PE=1 SV=1 - [ODPA_MOUSE]	P35486	24	25	45.64	52.05	1.122	1.202	1.5	1.1
1051	Aspartate aminotransferase, mitochondrial OS=Mus musculus GN=Got2 PE=1 SV=1 - [AATM_MOUSE]	P05202	27	31	52.56	53.02	1.171	1.203	0.5	1.8
1052	Succinate dehydrogenase [ubiquinone] flavoprotein subunit, mitochondrial OS=Mus musculus GN=Sdha PE=1 SV=1 - [DHSA_MOUSE]	Q8K2B3	26	24	34.64	31.48	1.101	1.203	0.7	2.2
1053	NADH dehydrogenase [ubiquinone] flavoprotein 1, mitochondrial OS=Mus musculus GN=Ndufv1 PE=1 SV=1 - [NDUV1_MOUSE]	Q91YT0	20	16	40.95	36.42	1.086	1.203	0.7	0.8
1054	RNA binding motif protein, X-linked-like-1 OS=Mus musculus GN=Rbmxl1 PE=1 SV=1 - [RMXL1_MOUSE]	Q91VM5	8	4	20.1	9.79	1.041	1.204	6.8	5.1
1055	4-aminobutyrate aminotransferase, mitochondrial OS=Mus musculus GN=Abat PE=1 SV=1 - [GABT_MOUSE]	P61922	22	22	54.8	48	1.169	1.205	2.6	1.3
1056	Pyruvate dehydrogenase E1 component subunit beta, mitochondrial OS=Mus musculus GN=Pdhb PE=1 SV=1 - [ODPB_MOUSE]	Q9D051	12	11	40.39	36.21	1.087	1.207	0.7	2
1057	Stress-70 protein, mitochondrial OS=Mus musculus GN=Hspa9 PE=1 SV=3 - [GRP75_MOUSE]	P38647	35	36	47.42	52.58	1.069	1.207	0.1	2.1
1058	Acyl-coenzyme A thioesterase 13 OS=Mus musculus GN=Acot13 PE=1 SV=1 - [ACO13_MOUSE]	Q9CQR4	4	5	24.29	32.14	1.065	1.213	2.3	1.5
1059	ES1 protein homolog, mitochondrial OS=Mus musculus GN=D10Jhu81e PE=1 SV=1 - [ES1_MOUSE]	Q9D172	10	10	42.11	43.98	1.147	1.214	3.3	1.1
1060	Adenylate kinase 4, mitochondrial OS=Mus musculus GN=Ak4 PE=1 SV=1 - [KAD4_MOUSE]	Q9WUR9	9	7	40.81	29.15	1.066	1.215	2.7	4.5
1061	ATP synthase subunit epsilon, mitochondrial OS=Mus musculus GN=Atp5e PE=1 SV=2 - [ATP5E_MOUSE]	P56382	5	5	63.46	63.46	0.825	1.217	3.1	1.6
1062	Methylcrotonoyl-CoA carboxylase beta chain, mitochondrial OS=Mus musculus GN=Mccc2 PE=1 SV=1 - [MCCB_MOUSE]	Q3ULD5	5	3	8.7	5.15	1.034	1.218	12.6	0.8
1063	Methylmalonate-semialdehyde dehydrogenase [acylating], mitochondrial OS=Mus musculus GN=Aldh6a1 PE=1 SV=1 - [MMSA_MOUSE]	Q9EQ20	18	17	32.52	35.33	1.055	1.219	1.3	3.5
1064	Enoyl-CoA delta isomerase 1, mitochondrial OS=Mus musculus GN=Eci1 PE=1 SV=2 - [ECI1_MOUSE]	P42125	8	3	30.8	11.07	1.1	1.22	3	5.6
1065	Mitochondrial inner membrane protein OS=Mus musculus GN=Immt PE=1 SV=1 - [IMMT_MOUSE]	Q8CAQ8	57	59	64.99	67.11	1.072	1.221	0.9	0.6
1066	2-oxoglutarate dehydrogenase, mitochondrial OS=Mus musculus GN=Ogdh PE=1 SV=3 - [ODO1_MOUSE]	Q60597	23	31	23.26	30.5	1.07	1.223	2.3	2
1067	Thiosulfate sulfurtransferase OS=Mus musculus GN=Tst PE=1 SV=3 - [THTR_MOUSE]	P52196	6	9	18.86	28.62	1.046	1.224	3.6	2.5
1068	Acetyl-CoA acetyltransferase, mitochondrial OS=Mus musculus GN=Acat1 PE=1 SV=1 - [THIL_MOUSE]	Q8QZT1	20	20	42.22	45.28	1.116	1.224	2.2	0.7
1069	ATP synthase subunit d, mitochondrial OS=Mus musculus GN=Atp5h PE=1 SV=3 - [ATP5H_MOUSE]	Q9DCX2	16	14	79.5	80.75	0.991	1.226	1.5	4.9
1070	ATP synthase-coupling factor 6, mitochondrial OS=Mus musculus GN=Atp5j PE=1 SV=1 - [ATP5J_MOUSE]	P97450	8	11	60.19	62.04	0.486	1.227	3	1.9
1071	Very long-chain specific acyl-CoA dehydrogenase, mitochondrial OS=Mus musculus GN=Acadvl PE=1 SV=3 - [ACADV_MOUSE]	P50544	5	3	9.76	4.88	1.064	1.227	1.8	7.3
1072	Dihydrolipoyllysine-residue succinyltransferase component of 2-oxoglutarate dehydrogenase complex, mitochondrial OS=Mus musculus GN=Dlst PE=1 SV=1 - [ODO2_MOUSE]	Q9D2G2	14	14	31.72	29.96	1.077	1.229	1.4	2.4
1073	DnaJ homolog subfamily C member 11 OS=Mus musculus GN=Dnajc11 PE=2 SV=2 - [DJC11_MOUSE]	Q5U458	6	8	11.99	9.3	0.945	1.229	9.6	10.6
1074	Succinyl-CoA:3-ketoacid coenzyme A transferase 1, mitochondrial OS=Mus musculus GN=Oxct1 PE=1 SV=1 - [SCOT1_MOUSE]	Q9D0K2	15	14	39.04	39.62	1.111	1.23	1.2	0.5
1075	Long-chain specific acyl-CoA dehydrogenase, mitochondrial OS=Mus musculus GN=Acadl PE=1 SV=2 - [ACADL_MOUSE]	P51174	14	9	23.49	17.67	1.106	1.231	2.6	8.9
1076	Aconitate hydratase, mitochondrial OS=Mus musculus GN=Aco2 PE=1 SV=1 - [ACON_MOUSE]	Q99KI0	45	44	52.95	54.62	1.138	1.231	0.5	0.7
1077	Superoxide dismutase [Mn], mitochondrial OS=Mus musculus GN=Sod2 PE=1 SV=3 - [SODM_MOUSE]	P09671	10	10	44.59	41.89	1.161	1.232	3.1	1.3
1078	Cytochrome b-c1 complex subunit 1, mitochondrial OS=Mus musculus GN=Uqcrc1 PE=1 SV=2 - [QCR1_MOUSE]	Q9CZ13	17	14	31.67	26.46	1.09	1.232	1.5	1.7
1079	NADH dehydrogenase [ubiquinone] 1 alpha subcomplex subunit 8 OS=Mus musculus GN=Ndufa8 PE=1 SV=3 - [NDUA8_MOUSE]	Q9DCJ5	5	6	28.49	43.6	0.974	1.236	5.9	6
1080	Heterochromatin protein 1-binding protein 3 OS=Mus musculus GN=Hp1bp3 PE=1 SV=1 - [HP1B3_MOUSE]	Q3TEA8	16	12	24.19	17.87	1.087	1.236	0.9	3.9
1081	Electron transfer flavoprotein subunit alpha, mitochondrial OS=Mus musculus GN=Etfa PE=1 SV=2 - [ETFA_MOUSE]	Q99LC5	15	14	57.66	53.75	1.144	1.242	2.1	2
1082	Ubiquinone biosynthesis protein COQ9, mitochondrial OS=Mus musculus GN=Coq9 PE=1 SV=1 - [COQ9_MOUSE]	Q8K1Z0	5	7	18.53	26.2	1.033	1.245	2.1	4.4
1083	ATP synthase subunit alpha, mitochondrial OS=Mus musculus GN=Atp5a1 PE=1 SV=1 - [ATPA_MOUSE]	Q03265	52	46	72.33	69.8	1.114	1.245	0.1	0.9
1084	NADH dehydrogenase [ubiquinone] 1 alpha subcomplex subunit 2 OS=Mus musculus GN=Ndufa2 PE=1 SV=3 - [NDUA2_MOUSE]	Q9CQ75	10	9	65.66	65.66	0.926	1.246	4.2	3.5
1085	2,4-dienoyl-CoA reductase, mitochondrial OS=Mus musculus GN=Decr1 PE=1 SV=1 - [DECR_MOUSE]	Q9CQ62	8	4	26.57	11.34	1.117	1.26	2.2	0.1
1086	Trifunctional enzyme subunit alpha, mitochondrial OS=Mus musculus GN=Hadha PE=1 SV=1 - [ECHA_MOUSE]	Q8BMS1	27	21	43.38	33.16	1.047	1.261	0.7	3.2
1087	Prelamin-A/C OS=Mus musculus GN=Lmna PE=1 SV=2 - [LMNA_MOUSE]	P48678	10	9	13.38	13.08	1.091	1.262	5.5	9.3
1088	Aldehyde dehydrogenase, mitochondrial OS=Mus musculus GN=Aldh2 PE=1 SV=1 - [ALDH2_MOUSE]	P47738	21	15	39.5	26.01	1.123	1.265	2.6	1.8
1089	Cytochrome c oxidase subunit 6B1 OS=Mus musculus GN=Cox6b1 PE=1 SV=2 - [CX6B1_MOUSE]	P56391	4	6	34.88	34.88	0.832	1.275	5.5	2.7
1090	Glutamate dehydrogenase 1, mitochondrial OS=Mus musculus GN=Glud1 PE=1 SV=1 - [DHE3_MOUSE]	P26443	27	27	48.21	45.88	1.08	1.301	1	0.9
1091	Lamin-B1 OS=Mus musculus GN=Lmnb1 PE=1 SV=3 - [LMNB1_MOUSE]	P14733	9	9	13.78	15.82	1.027	1.321	1.4	9.6
1092	Hydroxyacyl-coenzyme A dehydrogenase, mitochondrial OS=Mus musculus GN=Hadh PE=1 SV=2 - [HCDH_MOUSE]	Q61425	6	4	16.88	10.19	1.196	1.323	4.2	1.2
1093	Isocitrate dehydrogenase [NADP], mitochondrial OS=Mus musculus GN=Idh2 PE=1 SV=3 - [IDHP_MOUSE]	P54071	13	18	25.44	35.84	1.186	1.351	1	8.9
1094	Core histone macro-H2A.1 OS=Mus musculus GN=H2afy PE=1 SV=3 - [H2AY_MOUSE]	Q9QZQ8	11	6	38.71	20.16	1.002	1.366	5.7	5.1
1095	Methyl-CpG-binding protein 2 OS=Mus musculus GN=Mecp2 PE=1 SV=1 - [MECP2_MOUSE]	Q9Z2D6	15	5	35.54	14.67	1.031	1.384	2.4	6.5
1096	Isovaleryl-CoA dehydrogenase, mitochondrial OS=Mus musculus GN=Ivd PE=1 SV=1 - [IVD_MOUSE]	Q9JHI5	12	6	29.95	12.26	1.065	1.423	1	3.6
1097	Histone H2A.Z OS=Mus musculus GN=H2afz PE=1 SV=2 - [H2AZ_MOUSE]	P0C0S6	8	5	65.63	35.16	1.138	1.461	5	2.8
1098	PC4 and SFRS1-interacting protein OS=Mus musculus GN=Psip1 PE=1 SV=1 - [PSIP1_MOUSE]	Q99JF8	4	7	8.14	13.45	1.079	1.471	4.9	6.1
1099	Histone H1.1 OS=Mus musculus GN=Hist1h1a PE=1 SV=2 - [H11_MOUSE]	P43275	12	11	36.62	39.91	1.057	1.492	5.5	7.2
1100	Histone H2AX OS=Mus musculus GN=H2afx PE=1 SV=2 - [H2AX_MOUSE]	P27661	13	12	58.04	69.23	1.031	1.543	1.2	11.9
1101	Histone H4 OS=Mus musculus GN=Hist1h4a PE=1 SV=2 - [H4_MOUSE]	P62806	14	10	72.82	64.08	1.144	1.605	2.1	3.7
1102	Histone H1.0 OS=Mus musculus GN=H1f0 PE=2 SV=4 - [H10_MOUSE]	P10922	27	16	67.01	51.55	1.092	1.616	1.5	1.5
1103	Histone H1.5 OS=Mus musculus GN=Hist1h1b PE=1 SV=2 - [H15_MOUSE]	P43276	24	19	54.71	52.02	1.087	1.649	2.1	3.2
1104	Histone H2B type 3-A OS=Mus musculus GN=Hist3h2ba PE=1 SV=3 - [H2B3A_MOUSE]	Q9D2U9	16	13	77.78	72.22	0.99	1.652	1.6	3.8
1105	Histone H1.2 OS=Mus musculus GN=Hist1h1c PE=1 SV=2 - [H12_MOUSE]	P15864	30	24	66.51	60.38	1.23	1.656	2.4	0.7
1106	Histone H1.4 OS=Mus musculus GN=Hist1h1e PE=1 SV=2 - [H14_MOUSE]	P43274	32	23	66.67	57.53	1.221	1.743	1.4	3.1
1107	High mobility group protein HMG-I/HMG-Y OS=Mus musculus GN=Hmga1 PE=1 SV=4 - [HMGA1_MOUSE]	P17095	4	3	23.36	29.91	1.134	1.909	6.8	18.3

## Sheet: SubCom - SubNet
			1.1 - Calcium Signaling		4.1 - Cellular Respiration
			1.2 - Presynaptic Membrane		4.2 - Glycolysis
			1.3 - Exocytosis		4.3 - Guanine Metabolism
			1.4 - Cytoskeleton Organization		4.4 - Glycerol Metabolism
			1.5 - Membrane Assembly		4.5 - Mitochondrial Metabolism
			1.6 - G-Protein Signaling		4.6 - Mitochondrial Assembly
			1.7 - Organelle Transport
			1.8 - Actin Organization		5.1 - Fatty Acid Catabolism
			1.9 - Synapse Assembly		5.2 - Neurotransmitter Metabolism
			1.10 - Membrane Regulation		5.3 - Amino Acid Catabolism
			1.11 - Inhibitory Regulation		5.4 - Metabolism
			1.12 - Vesicle Priming		5.5 - Fatty Acid Metabolism
					5.6 - Mitochondrial Targeting
			2.1 - Membrane Trafficking
			2.2 - Vesicle Budding		6.1 - Mitochondrial Protein Trafficking
			2.3 - Endocytosis		6.2 - Heatshock Response
			2.4 - Proton Transport		6.3 - Neuronal Regulation
			2.5 - Phospholipid Metabolism		6.4 - Protein Folding
			2.6 - Vesicle Organization
			2.7 - Membrane Organization		7 - Functional Dynamics
			3.1 - Electron Transport Chain
			3.2 - Energy Metabolism
			3.3 - Stress Defense
						Subnetwork assignment
No.	Subcommunity	Name	UniProt Acc.	APP-KO/wt	NexCre/wt	Synaptic Vesicle Cycle	Calcium	Cytoskeleton
1	1. 1	Kalirin (EC 2.7.11.1) (Protein Duo) (Serine/threonine-protein kinase with Dbl- and pleckstrin homology domain)	A2CG49	1.031	1.066
2	1. 1	A-kinase anchor protein 5 (AKAP-5) (A-kinase anchor protein 150 kDa) (AKAP 150) (P150) (cAMP-dependent protein kinase regulatory subunit II high affinity-binding protein)	D3YVF0	0.899	0.916		*
3	1. 1	Ras/Rap GTPase-activating protein SynGAP (Neuronal RasGAP) (Synaptic Ras GTPase-activating protein 1) (Synaptic Ras-GAP 1)	F6SEU4	0.958	1.065
4	1. 1	Synaptogyrin-1	O55100	0.711	0.901
5	1. 1	cAMP-dependent protein kinase catalytic subunit alpha (PKA C-alpha) (EC 2.7.11.11)	P05132	1.038	0.862
6	1. 1	Neuromodulin (Axonal membrane protein GAP-43) (Calmodulin-binding protein P-57) (Growth-associated protein 43)	P06837	0.79	0.72		*
7	1. 1	Calcium/calmodulin-dependent protein kinase type II subunit alpha (CaM kinase II subunit alpha) (CaMK-II subunit alpha) (EC 2.7.11.17)	P11798	0.928	1.09		*
8	1. 1	cAMP-dependent protein kinase type II-alpha regulatory subunit	P12367	1.007	0.998
9	1. 1	Microtubule-associated protein 2 (MAP-2)	P20357	0.971	0.958		*	*
10	1. 1	Glutamate receptor 1 (GluR-1) (AMPA-selective glutamate receptor 1) (GluR-A) (GluR-K1) (Glutamate receptor ionotropic, AMPA 1) (GluA1)	P23818	0.925	1.044		*
11	1. 1	Myristoylated alanine-rich C-kinase substrate (MARCKS)	P26645	0.894	0.613		*
12	1. 1	Calcium/calmodulin-dependent protein kinase type II subunit beta (CaM kinase II subunit beta) (CaMK-II subunit beta) (EC 2.7.11.17)	P28652	1.062	1.054		*
13	1. 1	cAMP-dependent protein kinase type II-beta regulatory subunit	P31324	1.01	0.915
14	1. 1	Dual specificity mitogen-activated protein kinase kinase 1 (MAP kinase kinase 1) (MAPKK 1) (EC 2.7.12.2) (ERK activator kinase 1) (MAPK/ERK kinase 1) (MEK 1)	P31938	1.079	0.95			*
15	1. 1	Glutamate receptor ionotropic, NMDA 2A (GluN2A) (Glutamate [NMDA] receptor subunit epsilon-1) (N-methyl D-aspartate receptor subtype 2A) (NMDAR2A) (NR2A)	P35436	0.927	1.088
16	1. 1	Glutamate receptor ionotropic, NMDA 1 (GluN1) (Glutamate [NMDA] receptor subunit zeta-1) (N-methyl-D-aspartate receptor subunit NR1) (NMD-R1)	P35438	0.904	1.099
17	1. 1	Calmodulin (CaM)	P62204	0.309	0.542		*
18	1. 1	Ras-related protein Rap-1A (Ras-related protein Krev-1)	P62835	0.98	0.909
19	1. 1	Mitogen-activated protein kinase 1 (MAP kinase 1) (MAPK 1) (EC 2.7.11.24) (ERT1) (Extracellular signal-regulated kinase 2) (ERK-2) (MAP kinase isoform p42) (p42-MAPK) (Mitogen-activated protein kinase 2) (MAP kinase 2) (MAPK 2)	P63085	1.021	0.966			*
20	1. 1	Protein kinase C gamma type (PKC-gamma) (EC 2.7.11.13)	P63318	0.926	1.126		*
21	1. 1	Ras-related protein Ral-A	P63321	0.955	0.925
22	1. 1	Actin, alpha cardiac muscle 1 (Alpha-cardiac actin)	P68033	1.169	1.036
23	1. 1	cAMP-dependent protein kinase catalytic subunit beta (PKA C-beta) (EC 2.7.11.11)	P68181	1.04	0.933
24	1. 1	Protein kinase C beta type (PKC-B) (PKC-beta) (EC 2.7.11.13)	P68404	0.921	1.048		*
25	1. 1	Metabotropic glutamate receptor 1 (mGluR1)	P97772	0.972	1.026
26	1. 1	Glutamate receptor ionotropic, NMDA 2B (GluN2B) (Glutamate [NMDA] receptor subunit epsilon-2) (N-methyl D-aspartate receptor subtype 2B) (NMDAR2B) (NR2B)	Q01097	0.877	1.114
27	1. 1	Metabotropic glutamate receptor 5 (mGluR5)	Q3UVX5	1.012	1.076		*
28	1. 1	Myosin light polypeptide 6 (17 kDa myosin light chain) (LC17) (Myosin light chain 3) (MLC-3) (Myosin light chain alkali 3) (Myosin light chain A3) (Smooth muscle and nonmuscle myosin light chain alkali 6)	Q60605	0.938	0.877
29	1. 1	Serine/threonine-protein phosphatase 5 (PP5) (EC 3.1.3.16) (Protein phosphatase T) (PPT)	Q60676	0.96	0.998
30	1. 1	GTPase HRas (H-Ras-1) (Transforming protein p21) (c-H-ras) (p21ras) [Cleaved into: GTPase HRas, N-terminally processed]	Q61411	0.951	0.979
31	1. 1	Mitogen-activated protein kinase 10 (MAP kinase 10) (MAPK 10) (EC 2.7.11.24) (MAP kinase p49 3F12) (Stress-activated protein kinase JNK3) (c-Jun N-terminal kinase 3)	Q61831	1.041	1.015
32	1. 1	Myosin-10 (Cellular myosin heavy chain, type B) (Myosin heavy chain 10) (Myosin heavy chain, non-muscle IIb) (Non-muscle myosin heavy chain B) (NMMHC-B) (Non-muscle myosin heavy chain IIb) (NMMHC II-b) (NMMHC-IIB)	Q61879	1.025	1.033
33	1. 1	Astrocytic phosphoprotein PEA-15 (15 kDa phosphoprotein enriched in astrocytes)	Q62048	0.772	0.91
34	1. 1	Calcium/calmodulin-dependent protein kinase type II subunit delta (CaM kinase II subunit delta) (CaMK-II subunit delta) (EC 2.7.11.17)	Q6PHZ2	1.144	0.941		*
35	1. 1	Sodium/potassium-transporting ATPase subunit alpha-3 (Na(+)/K(+) ATPase alpha-3 subunit) (EC 3.6.3.9) (Na(+)/K(+) ATPase alpha(III) subunit) (Sodium pump subunit alpha-3)	Q6PIC6	0.907	0.972
36	1. 1	Myosin-14 (Myosin heavy chain 14) (Myosin heavy chain, non-muscle IIc) (Non-muscle myosin heavy chain IIc) (NMHC II-C)	Q6URW6	1.075	1.043
37	1. 1	SH3 and multiple ankyrin repeat domains protein 2 (Shank2) (Cortactin-binding protein 1) (CortBP1)	Q80Z38	0.957	1.047
38	1. 1	Calcium-binding mitochondrial carrier protein Aralar1 (Mitochondrial aspartate glutamate carrier 1) (Solute carrier family 25 member 12)	Q8BH59	1.061	1.18
39	1. 1	Paralemmin-2	Q8BR92	0.995	1.021
40	1. 1	Myosin-9 (Cellular myosin heavy chain, type A) (Myosin heavy chain 9) (Myosin heavy chain, non-muscle IIa) (Non-muscle myosin heavy chain A) (NMMHC-A) (Non-muscle myosin heavy chain IIa) (NMMHC II-a) (NMMHC-IIA)	Q8VDD5	1.162	1.086
41	1. 1	Brain acid soluble protein 1 (22 kDa neuronal tissue-enriched acidic protein) (Neuronal axonal membrane protein NAP-22)	Q91XV3	0.801	0.636		*
42	1. 1	Calcium/calmodulin-dependent protein kinase type II subunit gamma (CaM kinase II subunit gamma) (CaMK-II subunit gamma) (EC 2.7.11.17)	Q923T9	0.943	1.071
43	1. 1	Mitochondrial glutamate carrier 1 (GC-1) (Glutamate/H(+) symporter 1) (Solute carrier family 25 member 22)	Q9D6M3	1.109	1.131
44	1. 1	Leucine-rich glioma-inactivated protein 1	Q9JIA1	0.984	0.977
45	1. 1	Disintegrin and metalloproteinase domain-containing protein 11 (ADAM 11) (Metalloproteinase-like, disintegrin-like, and cysteine-rich protein) (MDC)	Q9R1V4	1.004	1.068
46	1. 1	Disintegrin and metalloproteinase domain-containing protein 22 (ADAM 22)	Q9R1V6	0.913	0.983
47	1. 1	MAGUK p55 subfamily member 2 (Discs large homolog 2) (Protein MPP2)	Q9WV34	1.001	0.964
48	1. 2	Neural cell adhesion molecule 2 (N-CAM-2) (NCAM-2) (Neural cell adhesion molecule RB-8) (R4B12)	O35136	0.916	0.942
49	1. 2	Major prion protein (PrP) (PrP27-30) (PrP33-35C) (CD antigen CD230)	P04925	1.059	0.963
50	1. 2	Apolipoprotein E (Apo-E)	P08226	1.055	0.943		*
51	1. 2	Protein disulfide-isomerase (PDI) (EC 5.3.4.1) (Cellular thyroid hormone-binding protein) (Endoplasmic reticulum resident protein 59) (ER protein 59) (ERp59) (Prolyl 4-hydroxylase subunit beta) (p55)	P09103	1.074	1.037
52	1. 2	Microtubule-associated protein tau (Neurofibrillary tangle protein) (Paired helical filament-tau) (PHF-tau)	P10637	0.832	0.823
53	1. 2	Neural cell adhesion molecule L1 (N-CAM-L1) (NCAM-L1) (CD antigen CD171)	P11627	0.933	1.14		*
54	1. 2	Amyloid beta A4 protein (ABPP) (APP) (Alzheimer disease amyloid A4 protein homolog) (Amyloidogenic glycoprotein) (AG) [Cleaved into: N-APP; Soluble APP-alpha (S-APP-alpha); Soluble APP-beta (S-APP-beta); C99 (APP-C99); Beta-amyloid protein 42 (Beta-APP42); Beta-amyloid protein 40 (Beta-APP40); C83; P3(42); P3(40); C80; Gamma-secretase C-terminal fragment 59 (APP-C59) (Amyloid intracellular domain…	P12023	1	1	*	*	*
55	1. 2	Contactin-1 (Neural cell surface protein F3)	P12960	0.92	1.078
56	1. 2	Neural cell adhesion molecule 1 (N-CAM-1) (NCAM-1) (CD antigen CD56)	P13595	0.914	0.987		*
57	1. 2	Spectrin alpha chain, non-erythrocytic 1 (Alpha-II spectrin) (Fodrin alpha chain)	P16546	1.081	0.996		*	*
58	1. 2	Calnexin	P35564	1.009	1.094		*
59	1. 2	Alpha-2-macroglobulin receptor-associated protein (Alpha-2-MRAP) (Heparin-binding protein 44) (HBP-44) (Low density lipoprotein receptor-related protein-associated protein 1) (RAP)	P55302	0.944	1.001
60	1. 2	Alpha-actinin-4 (Non-muscle alpha-actinin 4)	P57780	1.003	1.024			*
61	1. 2	Ras-related protein Rab-3C	P62823	0.993	1.027
62	1. 2	14-3-3 protein theta (14-3-3 protein tau)	P68254	0.886	0.831
63	1. 2	Carboxypeptidase E (CPE) (EC 3.4.17.10) (Carboxypeptidase H) (CPH) (Enkephalin convertase) (Prohormone-processing carboxypeptidase)	Q00493	1.065	0.967
64	1. 2	Amyloid-like protein 1 (APLP) (APLP-1) [Cleaved into: C30]	Q03157	1	1	*	*	*
65	1. 2	Amyloid-like protein 2 (APLP-2) (CDEI box-binding protein) (CDEBP)	Q06335	1	1	*	*	*
66	1. 2	Spectrin beta chain, non-erythrocytic 1 (Beta-II spectrin) (Embryonic liver fodrin) (Fodrin beta chain)	Q62261	1.062	0.997			*
67	1. 2	Gamma-aminobutyric acid type B receptor subunit 2 (GABA-B receptor 2) (GABA-B-R2) (GABA-BR2) (GABABR2) (Gb2) (G-protein coupled receptor 51)	Q80T41	0.932	0.999
68	1. 2	Neurofascin	Q810U3	0.898	1.034
69	1. 2	Neuronal cell adhesion molecule (Nr-CAM) (Neuronal surface protein Bravo) (mBravo) (NgCAM-related cell adhesion molecule) (Ng-CAM-related)	Q810U4	0.938	1.055
70	1. 2	Limbic system-associated membrane protein (LSAMP)	Q8BLK3	0.865	1.042
71	1. 2	Ankyrin-2 (ANK-2) (Brain ankyrin)	Q8C8R3	1.008	0.986		*	*
72	1. 2	Immunoglobulin superfamily member 8 (IgSF8) (CD81 partner 3) (Glu-Trp-Ile EWI motif-containing protein 2) (EWI-2) (Keratinocyte-associated transmembrane protein 4) (KCT-4) (Prostaglandin regulatory-like protein) (PGRL) (CD antigen CD316)	Q8R366	0.923	1.026
73	1. 2	Prolow-density lipoprotein receptor-related protein 1 (LRP-1) (Alpha-2-macroglobulin receptor) (A2MR) (CD antigen CD91) [Cleaved into: Low-density lipoprotein receptor-related protein 1 85 kDa subunit (LRP-85); Low-density lipoprotein receptor-related protein 1 515 kDa subunit (LRP-515); Low-density lipoprotein receptor-related protein 1 intracellular domain (LRPICD)]	Q91ZX7	1.012	1.047
74	1. 2	Beta-Synuclein	Q91ZZ3	0.843	0.636
75	1. 2	Protein disulfide-isomerase A6 (EC 5.3.4.1) (Thioredoxin domain-containing protein 7)	Q922R8	1.1	1.044
76	1. 2	Neurotrimin	Q99PJ0	0.929	1.079
77	1. 2	14-3-3 protein beta/alpha (Protein kinase C inhibitor protein 1) (KCIP-1) [Cleaved into: 14-3-3 protein beta/alpha, N-terminally processed]	Q9CQV8	0.81	0.873
78	1. 2	Ras-related protein Rab-3B	Q9CZT8	0.99	1.058
79	1. 2	EF-hand domain-containing protein D2 (Swiprosin-1)	Q9D8Y0	0.878	0.86
80	1. 2	Amyloid beta A4 precursor protein-binding family B member 1 (Protein Fe65)	Q9QXJ1	1	1
81	1. 2	Glypican-1 [Cleaved into: Secreted glypican-1]	Q9QZF2	0.923	1.015
82	1. 2	Plasma membrane calcium-transporting ATPase 2 (PMCA2) (EC 3.6.3.8) (Plasma membrane calcium ATPase isoform 2) (Plasma membrane calcium pump isoform 2)	Q9R0K7	0.942	1.025		*
83	1. 2	Disintegrin and metalloproteinase domain-containing protein 23 (ADAM 23) (Metalloproteinase-like, disintegrin-like, and cysteine-rich protein 3) (MDC-3)	Q9R1V7	0.947	1.003
84	1. 2	Gamma-aminobutyric acid type B receptor subunit 1 (GABA-B receptor 1) (GABA-B-R1) (GABA-BR1) (GABABR1) (Gb1)	Q9WV18	0.904	1.01
85	1. 2	Dipeptidyl aminopeptidase-like protein 6 (DPPX) (Dipeptidyl aminopeptidase-related protein) (Dipeptidyl peptidase 6) (Dipeptidyl peptidase IV-like protein) (Dipeptidyl peptidase VI) (DPP VI)	Q9Z218	0.927	1.035
86	1. 2	RasGAP-activating-like protein 1	Q9Z268	1.047	0.981
87	1. 3	Syntaxin-binding protein 1 (Protein unc-18 homolog 1) (Unc18-1) (Protein unc-18 homolog A) (Unc-18A)	O08599	1.028	0.901	*	*
88	1. 3	Tyrosine-protein phosphatase non-receptor type 9 (EC 3.1.3.48) (Protein-tyrosine phosphatase MEG2) (PTPase MEG2)	O35239	1.072	0.99
89	1. 3	Syntaxin-1A (Neuron-specific antigen HPC-1)	O35526	0.907	1.043	*	*
90	1. 3	Alpha-synuclein (Non-A beta component of AD amyloid) (Non-A4 component of amyloid precursor) (NACP)	O55042	0.836	0.528	*	*
91	1. 3	Guanine nucleotide-binding protein G(o) subunit alpha	P18872	0.937	1.022	*	*
92	1. 3	Glutamate receptor 2 (GluR-2) (AMPA-selective glutamate receptor 2) (GluR-B) (GluR-K2) (Glutamate receptor ionotropic, AMPA 2) (GluA2)	P23819	0.911	1.129
93	1. 3	Microtubule-associated protein 4 (MAP-4)	P27546	0.916	0.962			*
94	1. 3	Beta-soluble NSF attachment protein (SNAP-beta) (Brain protein I47) (N-ethylmaleimide-sensitive factor attachment protein beta)	P28663	0.948	0.894	*
95	1. 3	Neuronal membrane glycoprotein M6-a (M6a)	P35802	0.901	0.834		*
96	1. 3	Synaptotagmin-1 (Synaptotagmin I) (SytI) (p65)	P46096	0.936	1.078	*	*
97	1. 3	Vesicle-fusing ATPase (EC 3.6.4.6) (N-ethylmaleimide-sensitive fusion protein) (NEM-sensitive fusion protein) (Suppressor of K(+) transport growth defect 2) (Protein SKD2) (Vesicular-fusion protein NSF)	P46460	1.028	1.081	*
98	1. 3	Synaptosomal-associated protein 25 (SNAP-25) (Super protein) (SUP) (Synaptosomal-associated 25 kDa protein)	P60879	0.917	0.997	*	*
99	1. 3	Syntaxin-1B	P61264	0.865	0.987	*
100	1. 3	Guanine nucleotide-binding protein G(I)/G(S)/G(T) subunit beta-1 (Transducin beta chain 1)	P62874	1.027	0.87	*	*
101	1. 3	Complexin-1 (921-S) (Complexin I) (CPX I) (Synaphin-2)	P63040	0.876	0.911
102	1. 3	Vesicle-associated membrane protein 2 (VAMP-2) (Synaptobrevin-2)	P63044	0.944	0.853	*	*
103	1. 3	Guanine nucleotide-binding protein G(I)/G(S)/G(O) subunit gamma-2 (G gamma-I)	P63213	0.37	0.536	*	*
104	1. 3	Tubulin alpha-1A chain (Alpha-tubulin 1) (Alpha-tubulin isotype M-alpha-1) (Tubulin alpha-1 chain)	P68369	0.97	1.026			*
105	1. 3	Sodium/calcium exchanger 1 (Na(+)/Ca(2+)-exchange protein 1) (Solute carrier family 8 member 1)	P70414	0.925	1.01
106	1. 3	Tubulin beta-5 chain	P99024	0.92	1.067			*
107	1. 3	Vesicle-associated membrane protein 1 (VAMP-1) (Synaptobrevin-1)	Q62442	0.929	0.924	*
108	1. 3	Sodium/potassium-transporting ATPase subunit alpha-2 (Na(+)/K(+) ATPase alpha-2 subunit) (EC 3.6.3.9) (Na(+)/K(+) ATPase alpha(+) subunit) (Sodium pump subunit alpha-2)	Q6PIE5	0.927	1.049
109	1. 3	Tubulin beta-2A chain	Q7TMM9	0.934	1.024
110	1. 3	Microtubule-associated protein 6 (MAP-6) (Stable tubule-only polypeptide) (STOP)	Q7TSJ2	0.98	0.989
111	1. 3	Syntaxin-binding protein 5 (Lethal(2) giant larvae protein homolog 3) (Tomosyn-1)	Q8K400	0.954	0.989	*
112	1. 3	Sodium/potassium-transporting ATPase subunit alpha-1 (Na(+)/K(+) ATPase alpha-1 subunit) (EC 3.6.3.9) (Sodium pump subunit alpha-1)	Q8VDN2	0.914	0.974
113	1. 3	Voltage-dependent calcium channel gamma-8 subunit (Neuronal voltage-gated calcium channel gamma-8 subunit) (Transmembrane AMPAR regulatory protein gamma-8) (TARP gamma-8)	Q8VHW2	0.901	1.075
114	1. 3	Gamma-soluble NSF attachment protein (SNAP-gamma) (N-ethylmaleimide-sensitive factor attachment protein gamma)	Q9CWZ7	0.966	0.921	*
115	1. 3	Alpha-soluble NSF attachment protein (SNAP-alpha) (N-ethylmaleimide-sensitive factor attachment protein alpha)	Q9DB05	1.008	0.905	*
116	1. 3	Vesicle-associated membrane protein-associated protein B (VAMP-B) (VAMP-associated protein B) (VAP-B) (VAMP-associated protein 33b)	Q9QY76	0.979	1.024		*
117	1. 3	Synaptotagmin-7 (Synaptotagmin VII) (SytVII)	Q9R0N7	0.956	1.052
118	1. 3	Ubiquitin carboxyl-terminal hydrolase isozyme L1 (UCH-L1) (EC 3.4.19.12) (EC 6.-.-.-) (Neuron cytoplasmic protein 9.5) (PGP 9.5) (PGP9.5) (Ubiquitin thioesterase L1)	Q9R0P9	0.991	0.795
119	1. 3	Vesicle-associated membrane protein-associated protein A (VAMP-A) (VAMP-associated protein A) (VAP-A) (33 kDa VAMP-associated protein) (VAP-33)	Q9WV55	0.948	1.042
120	1. 3	Paralemmin-1 (Paralemmin)	Q9Z0P4	0.826	0.971
121	1. 3	Glutamate receptor 3 (GluR-3) (AMPA-selective glutamate receptor 3) (GluR-C) (GluR-K3) (Glutamate receptor ionotropic, AMPA 3) (GluA3)	Q9Z2W9	0.875	1.092
122	1. 4	Synapsin-1 (Synapsin I)	O88935	1.004	0.946			*
123	1. 4	Glial fibrillary acidic protein (GFAP)	P03995	1.065	0.818
124	1. 4	Neurofilament light polypeptide (NF-L) (68 kDa neurofilament protein) (Neurofilament triplet L protein)	P08551	0.994	0.743			*
125	1. 4	Neurofilament medium polypeptide (NF-M) (160 kDa neurofilament protein) (Neurofilament 3) (Neurofilament triplet M protein)	P08553	0.962	0.805			*
126	1. 4	Gelsolin (Actin-depolymerizing factor) (ADF) (Brevin)	P13020	0.864	0.95
127	1. 4	Neurofilament heavy polypeptide (NF-H) (200 kDa neurofilament protein) (Neurofilament triplet H protein)	P19246	0.983	0.856			*
128	1. 4	Alpha-internexin (Alpha-Inx) (66 kDa neurofilament protein) (NF-66) (Neurofilament-66)	P46660	0.985	0.845			*
129	1. 4	Carbonyl reductase [NADPH] 1 (EC 1.1.1.184) (15-hydroxyprostaglandin dehydrogenase [NADP(+)]) (EC 1.1.1.197) (NADPH-dependent carbonyl reductase 1) (Prostaglandin 9-ketoreductase) (Prostaglandin-E(2) 9-reductase) (EC 1.1.1.189)	P48758	1.059	0.935
130	1. 4	Neurogranin (Ng) (RC3) [Cleaved into: NEUG(55-78)]	P60761	0.735	0.774
131	1. 4	14-3-3 protein gamma [Cleaved into: 14-3-3 protein gamma, N-terminally processed]	P61982	0.867	0.845
132	1. 4	14-3-3 protein epsilon (14-3-3E)	P62259	0.772	0.865
133	1. 4	Voltage-gated potassium channel subunit beta-2 (K(+) channel subunit beta-2) (Kv-beta-2) (Neuroimmune protein F5)	P62482	1.055	0.933
134	1. 4	14-3-3 protein zeta/delta (Protein kinase C inhibitor protein 1) (KCIP-1) (SEZ-2)	P63101	0.813	0.804
135	1. 4	CaM kinase-like vesicle-associated protein	Q3UHL1	1.017	0.983
136	1. 4	Serine/threonine-protein kinase BRSK1 (EC 2.7.11.1) (EC 2.7.11.26) (Brain-specific serine/threonine-protein kinase 1) (BR serine/threonine-protein kinase 1) (Serine/threonine-protein kinase SAD-B)	Q5RJI5	0.97	1.078
137	1. 4	Heat shock 70 kDa protein 4 (Heat shock 70-related protein APG-2)	Q61316	1.006	0.929
138	1. 4	Synaptic vesicle membrane protein VAT-1 homolog (EC 1.-.-.-)	Q62465	1.055	0.928
139	1. 4	Adapter molecule crk (Proto-oncogene c-Crk) (p38)	Q64010	0.996	0.986			*
140	1. 4	Synapsin-2 (Synapsin II)	Q64332	1.032	0.941	*		*
141	1. 4	ARF GTPase-activating protein GIT1 (ARF GAP GIT1) (G protein-coupled receptor kinase-interactor 1) (GRK-interacting protein 1)	Q68FF6	0.986	1.06			*
142	1. 4	SLIT-ROBO Rho GTPase-activating protein 3 (srGAP3) (Rho GTPase-activating protein 14) (WAVE-associated Rac GTPase-activating protein) (WRP)	Q812A2	1.095	1.043			*
143	1. 4	Microtubule-associated protein RP/EB family member 2 (APC-binding protein EB2) (End-binding protein 2) (EB2)	Q8R001	0.952	1.068
144	1. 4	Adenylate kinase isoenzyme 5 (AK 5) (EC 2.7.4.3) (EC 2.7.4.6) (ATP-AMP transphosphorylase 5)	Q920P5	1.102	1.137
145	1. 4	GTP-binding protein Rheb (Ras homolog enriched in brain)	Q921J2	0.958	0.961
146	1. 4	Unconventional myosin-Va (Dilute myosin heavy chain, non-muscle)	Q99104	0.979	1.045			*
147	1. 4	Synaptic vesicle glycoprotein 2A (Synaptic vesicle protein 2) (Synaptic vesicle protein 2A) (Calcium regulator SV2A)	Q9JIS5	0.997	1.001	*	*	*
148	1. 4	Profilin-2 (Profilin II)	Q9JJV2	0.915	0.913			*
149	1. 4	SRC kinase signaling inhibitor 1 (SNAP-25-interacting protein) (SNIP) (p130Cas-associated protein) (p140Cap)	Q9QWI6	0.929	1.062
150	1. 4	Plectin (PCN) (PLTN) (Plectin-1) (Plectin-6)	Q9QXS1	1.018	0.997
151	1. 4	Drebrin (Developmentally-regulated brain protein)	Q9QXS6	0.905	1.005			*
152	1. 5	Coronin-1A (Coronin-like protein A) (Clipin-A) (Coronin-like protein p57) (Tryptophan aspartate-containing coat protein) (TACO)	O89053	1.009	1.018			*
153	1. 5	Neuronal proto-oncogene tyrosine-protein kinase Src (EC 2.7.10.2) (Proto-oncogene c-Src) (pp60c-src) (p60-Src)	P05480	0.946	0.991
154	1. 5	Cadherin-2 (Neural cadherin) (N-cadherin) (CD antigen CD325)	P15116	0.879	1.051			*
155	1. 5	Protein kinase C epsilon type (EC 2.7.11.13) (nPKC-epsilon)	P16054	1.035	1.03			*
156	1. 5	Receptor-type tyrosine-protein phosphatase alpha (Protein-tyrosine phosphatase alpha) (R-PTP-alpha) (EC 3.1.3.48) (LCA-related phosphatase) (PTPTY-28)	P18052	1.012	1.072
157	1. 5	Vimentin	P20152	1.139	0.935			*
158	1. 5	Gap junction alpha-1 protein (Connexin-43) (Cx43) (Gap junction 43 kDa heart protein)	P23242	1.013	1.006			*
159	1. 5	Alpha-crystallin B chain (Alpha(B)-crystallin) (P23)	P23927	1.009	0.918			*
160	1. 5	Catenin delta-1 (Cadherin-associated Src substrate) (CAS) (p120 catenin) (p120(ctn)) (p120(cas))	P30999	1.006	0.942			*
161	1. 5	Tyrosine-protein kinase Fyn (EC 2.7.10.2) (Proto-oncogene c-Fyn) (p59-Fyn)	P39688	0.955	1.034
162	1. 5	F-actin-capping protein subunit alpha-2 (CapZ alpha-2)	P47754	1.048	1.025			*
163	1. 5	F-actin-capping protein subunit beta (CapZ beta)	P47757	1.086	0.991			*
164	1. 5	ADP/ATP translocase 1 (ADP,ATP carrier protein 1) (ADP,ATP carrier protein, heart/skeletal muscle isoform T1) (Adenine nucleotide translocator 1) (ANT 1) (Solute carrier family 25 member 4) (mANC1)	P48962	1.124	1.14
165	1. 5	Cyclin-dependent-like kinase 5 (EC 2.7.11.1) (CR6 protein kinase) (CRK6) (Cell division protein kinase 5) (Serine/threonine-protein kinase PSSALRE) (Tau protein kinase II catalytic subunit) (TPKII catalytic subunit)	P49615	1.095	1.014			*
166	1. 5	ADP/ATP translocase 2 (ADP,ATP carrier protein 2) (Adenine nucleotide translocator 2) (ANT 2) (Solute carrier family 25 member 5) [Cleaved into: ADP/ATP translocase 2, N-terminally processed]	P51881	1.107	1.139
167	1. 5	Tropomyosin alpha-1 chain (Alpha-tropomyosin) (Tropomyosin-1)	P58771	0.806	0.867			*
168	1. 5	Neural cell adhesion molecule L1-like protein (Cell adhesion molecule with homology to L1CAM) (Chl1-like protein) (Close homolog of L1) [Cleaved into: Processed neural cell adhesion molecule L1-like protein]	P70232	0.937	1.103
169	1. 5	Receptor-type tyrosine-protein phosphatase N2 (R-PTP-N2) (EC 3.1.3.48) (PTP IA-2beta) (Protein tyrosine phosphatase-NP) (PTP-NP)	P80560	1.064	0.97
170	1. 5	Catenin beta-1 (Beta-catenin)	Q02248	1.043	0.972			*
171	1. 5	Ephrin type-A receptor 4 (EC 2.7.10.1) (Tyrosine-protein kinase receptor MPK-3) (Tyrosine-protein kinase receptor SEK-1)	Q03137	0.929	1.059
172	1. 5	Voltage-dependent anion-selective channel protein 1 (VDAC-1) (mVDAC1) (Outer mitochondrial membrane protein porin 1) (Plasmalemmal porin) (Voltage-dependent anion-selective channel protein 5) (VDAC-5) (mVDAC5)	Q60932	0.905	1.148
173	1. 5	Catenin alpha-2 (Alpha N-catenin)	Q61301	1.043	0.993			*
174	1. 5	Plakophilin-4 (Armadillo-related protein)	Q68FH0	0.955	1.101			*
175	1. 5	Tubulin beta-3 chain	Q9ERD7	1.007	1.014			*
176	1. 6	Serine/threonine-protein kinase PAK 1 (EC 2.7.11.1) (Alpha-PAK) (CDC42/RAC effector kinase PAK-A) (p21-activated kinase 1) (PAK-1) (p65-PAK)	O88643	1.029	0.986			*
177	1. 6	Ezrin (Cytovillin) (Villin-2) (p81)	P26040	0.937	0.95
178	1. 6	Ras-related protein Rab-6A (Rab-6)	P35279	0.845	0.95
179	1. 6	Rabphilin-3A (Exophilin-1)	P47708	0.926	0.958	*	*
180	1. 6	Rab GDP dissociation inhibitor alpha (Rab GDI alpha) (Guanosine diphosphate dissociation inhibitor 1) (GDI-1)	P50396	0.973	0.928
181	1. 6	Ras-related protein Rab-2A	P53994	0.982	0.958
182	1. 6	Cell division control protein 42 homolog (G25K GTP-binding protein)	P60766	0.92	0.971
183	1. 6	Ras-related protein Rab-10	P61027	0.881	0.979
184	1. 6	Rho-related GTP-binding protein RhoB	P62746	0.946	0.96			*
185	1. 6	Ras-related protein Rab-1A (YPT1-related protein)	P62821	0.934	1.016
186	1. 6	Ras-related C3 botulinum toxin substrate 1 (p21-Rac1)	P63001	0.965	0.951			*
187	1. 6	Ras-related protein Rab-3A	P63011	0.956	0.989	*
188	1. 6	Na(+)/H(+) exchange regulatory cofactor NHE-RF1 (NHERF-1) (Ezrin-radixin-moesin-binding phosphoprotein 50) (EBP50) (Regulatory cofactor of Na(+)/H(+) exchanger) (Sodium-hydrogen exchanger regulatory factor 1) (Solute carrier family 9 isoform A3 regulatory factor 1)	P70441	0.909	0.834
189	1. 6	Rho-related GTP-binding protein RhoG (Sid 10750)	P84096	0.895	0.955
190	1. 6	Tyrosine-protein phosphatase non-receptor type substrate 1 (SHP substrate 1) (SHPS-1) (Brain Ig-like molecule with tyrosine-based activation motifs) (Bit) (CD172 antigen-like family member A) (Inhibitory receptor SHPS-1) (MyD-1 antigen) (Signal-regulatory protein alpha-1) (Sirp-alpha-1) (mSIRP-alpha1) (p84) (CD antigen CD172a)	P97797	0.955	1.005
191	1. 6	Rho GTPase-activating protein 1 (Rho-type GTPase-activating protein 1)	Q5FWK3	1.055	0.966
192	1. 6	Rho guanine nucleotide exchange factor 2 (Guanine nucleotide exchange factor H1) (GEF-H1) (LBC'S first cousin) (Lymphoid blast crisis-like 1) (Oncogene LFC) (Rhobin)	Q60875	1.096	1.026
193	1. 6	Rab GDP dissociation inhibitor beta (Rab GDI beta) (GDI-3) (Guanosine diphosphate dissociation inhibitor 2) (GDI-2)	Q61598	0.987	0.94
194	1. 6	Leukocyte surface antigen CD47 (Integrin-associated protein) (IAP) (CD antigen CD47)	Q61735	0.924	1.016
195	1. 6	Neurabin-2 (Neurabin-II) (Protein phosphatase 1 regulatory subunit 9B) (Spinophilin)	Q6R891	1.03	1.101
196	1. 6	Mitochondrial Rho GTPase 1 (MIRO-1) (EC 3.6.5.-) (Ras homolog gene family member T1)	Q8BG51	1.186	1.094
197	1. 6	Rho GDP-dissociation inhibitor 1 (Rho GDI 1) (GDI-1) (Rho-GDI alpha)	Q99PT1	1.008	0.875
198	1. 6	Transforming protein RhoA	Q9QUI0	1.046	0.967			*
199	1. 7	Dynactin subunit 1 (150 kDa dynein-associated polypeptide) (DAP-150) (DP-150) (p150-glued)	O08788	0.88	1.023			*
200	1. 7	Peptidyl-prolyl cis-trans isomerase FKBP8 (PPIase FKBP8) (EC 5.2.1.8) (38 kDa FK506-binding protein) (38 kDa FKBP) (FKBP-38) (mFKBP38) (FK506-binding protein 8) (FKBP-8) (FKBPR38) (Rotamase)	O35465	1.048	1.045
201	1. 7	Microtubule-associated protein 1B (MAP-1B) (MAP1(X)) (MAP1.2) [Cleaved into: MAP1B heavy chain; MAP1 light chain LC1]	P14873	1.001	1.02			*
202	1. 7	Basigin (Basic immunoglobulin superfamily) (HT7 antigen) (Membrane glycoprotein gp42) (CD antigen CD147)	P18572	0.927	0.949
203	1. 7	MARCKS-related protein (Brain protein F52) (MARCKS-like protein 1) (Macrophage myristoylated alanine-rich C kinase substrate) (Mac-MARCKS) (MacMARCKS)	P28667	0.939	0.743			*
204	1. 7	Platelet-activating factor acetylhydrolase IB subunit alpha (Lissencephaly-1 protein) (LIS-1) (PAF acetylhydrolase 45 kDa subunit) (PAF-AH 45 kDa subunit) (PAF-AH alpha) (PAFAH alpha)	P63005	0.97	0.998
205	1. 7	Serine/threonine-protein phosphatase 2A catalytic subunit alpha isoform (PP2A-alpha) (EC 3.1.3.16)	P63330	1.016	0.959			*
206	1. 7	Serine/threonine-protein phosphatase 2A 56 kDa regulatory subunit gamma isoform (PP2A B subunit isoform B'-alpha-3) (PP2A B subunit isoform B'-gamma) (PP2A B subunit isoform B56-gamma) (PP2A B subunit isoform PR61-gamma) (PP2A B subunit isoform R5-gamma)	Q60996	1.082	0.969			*
207	1. 7	Serine/threonine-protein phosphatase 2A 56 kDa regulatory subunit epsilon isoform (PP2A B subunit isoform B'-epsilon) (PP2A B subunit isoform B56-epsilon) (PP2A B subunit isoform PR61-epsilon) (PP2A B subunit isoform R5-epsilon)	Q61151	0.949	0.989			*
208	1. 7	Platelet-activating factor acetylhydrolase IB subunit beta (EC 3.1.1.47) (PAF acetylhydrolase 30 kDa subunit) (PAF-AH 30 kDa subunit) (PAF-AH subunit beta) (PAFAH subunit beta)	Q61206	0.99	0.903
209	1. 7	Serine/threonine-protein phosphatase 2A 55 kDa regulatory subunit B alpha isoform (PP2A subunit B isoform B55-alpha) (PP2A subunit B isoform PR55-alpha) (PP2A subunit B isoform R2-alpha) (PP2A subunit B isoform alpha)	Q6P1F6	0.999	0.967			*
210	1. 7	Microtubule-associated protein RP/EB family member 3 (EB1 protein family member 3) (EBF3) (End-binding protein 3) (EB3) (RP3)	Q6PER3	1.034	1.014			*
211	1. 7	Serine/threonine-protein phosphatase 2A 65 kDa regulatory subunit A alpha isoform (PP2A subunit A isoform PR65-alpha) (PP2A subunit A isoform R1-alpha)	Q76MZ3	0.998	0.93			*
212	1. 7	Pyridoxal kinase (EC 2.7.1.35) (Pyridoxine kinase)	Q8K183	1.007	0.952
213	1. 7	Microtubule-associated proteins 1A/1B light chain 3A (Autophagy-related protein LC3 A) (Autophagy-related ubiquitin-like modifier LC3 A) (MAP1 light chain 3-like protein 1) (MAP1A/MAP1B light chain 3 A) (MAP1A/MAP1B LC3 A) (Microtubule-associated protein 1 light chain 3 alpha)	Q91VR7	1.059	0.927			*
214	1. 7	Dynactin subunit 2 (50 kDa dynein-associated polypeptide) (Dynactin complex 50 kDa subunit) (DCTN-50) (Growth cone membrane protein 23-48K) (GMP23-48K) (p50 dynamitin)	Q99KJ8	1.014	0.953			*
215	1. 7	Casein kinase I isoform delta (CKI-delta) (CKId) (EC 2.7.11.1) (Tau-protein kinase CSNK1D) (EC 2.7.11.26)	Q9DC28	1.183	0.892
216	1. 7	Cytoplasmic dynein 1 heavy chain 1 (Cytoplasmic dynein heavy chain 1) (Dynein heavy chain, cytosolic)	Q9JHU4	1.029	1.005			*
217	1. 7	Microtubule-associated protein 1A (MAP-1A) [Cleaved into: MAP1A heavy chain; MAP1 light chain LC2]	Q9QYR6	1.012	0.951			*
218	1. 8	WD repeat-containing protein 1 (Actin-interacting protein 1) (AIP1)	O88342	1.008	0.967			*
219	1. 8	Sodium/potassium-transporting ATPase subunit beta-1 (Sodium/potassium-dependent ATPase subunit beta-1)	P14094	0.917	0.971
220	1. 8	Cofilin-1 (Cofilin, non-muscle isoform)	P18760	0.831	0.835			*
221	1. 8	Adenylyl cyclase-associated protein 1 (CAP 1)	P40124	1.009	0.925			*
222	1. 8	Actin-related protein 2/3 complex subunit 4 (Arp2/3 complex 20 kDa subunit) (p20-ARC)	P59999	0.879	0.871			*
223	1. 8	Actin, cytoplasmic 1 (Beta-actin) [Cleaved into: Actin, cytoplasmic 1, N-terminally processed]	P60710	1.043	1.007			*
224	1. 8	Actin-related protein 2 (Actin-like protein 2)	P61161	1.005	0.993			*
225	1. 8	Profilin-1 (Profilin I)	P62962	0.956	0.945			*
226	1. 8	Src substrate cortactin	Q60598	1.03	0.874			*
227	1. 8	Actin-related protein 3 (Actin-like protein 3)	Q99JY9	1.031	0.954			*
228	1. 8	Actin-related protein 2/3 complex subunit 5 (Arp2/3 complex 16 kDa subunit) (p16-ARC)	Q9CPW4	0.905	0.861			*
229	1. 8	Coactosin-like protein	Q9CQI6	0.813	0.911			*
230	1. 8	Actin-related protein 2/3 complex subunit 2 (Arp2/3 complex 34 kDa subunit) (p34-ARC)	Q9CVB6	1.009	0.925			*
231	1. 8	Adenylyl cyclase-associated protein 2 (CAP 2)	Q9CYT6	0.993	0.957			*
232	1. 8	Actin-related protein 2/3 complex subunit 5-like protein (Arp2/3 complex 16 kDa subunit 2) (ARC16-2)	Q9D898	0.967	0.944			*
233	1. 8	Actin-related protein 2/3 complex subunit 3 (Arp2/3 complex 21 kDa subunit) (p21-ARC)	Q9JM76	0.917	0.995			*
234	1. 8	Actin-related protein 2/3 complex subunit 1A (SOP2-like protein) (Sid 329)	Q9R0Q6	1.016	0.928			*
235	1. 9	Band 4.1-like protein 2 (Generally expressed protein 4.1) (4.1G)	O70318	0.915	0.987			*
236	1. 9	Peripheral plasma membrane protein CASK (EC 2.7.11.1) (Calcium/calmodulin-dependent serine protein kinase)	O70589	1.038	1.062		*
237	1. 9	Protein lin-7 homolog C (Lin-7C) (mLin7C) (Mammalian lin-seven protein 3) (MALS-3) (Vertebrate lin-7 homolog 3) (Veli-3)	O88952	1.038	0.97
238	1. 9	2',3'-cyclic-nucleotide 3'-phosphodiesterase (CNP) (CNPase) (EC 3.1.4.37)	P16330	0.837	0.839
239	1. 9	Liprin-alpha-3 (Protein tyrosine phosphatase receptor type f polypeptide-interacting protein alpha-3) (PTPRF-interacting protein alpha-3)	P60469	0.986	0.971
240	1. 9	Arf-GAP with GTPase, ANK repeat and PH domain-containing protein 2 (AGAP-2) (Centaurin-gamma-1) (Cnt-g1) (Phosphatidylinositol 3-kinase enhancer) (PIKE)	Q3UHD9	0.993	1.067			*
241	1. 9	Caskin-1 (CASK-interacting protein 1)	Q6P9K8	1.073	1.139
242	1. 9	Neurexin-3 (Neurexin III-alpha) (Neurexin-3-alpha)	Q6P9K9	0.978	1.024		*
243	1. 9	Neuroligin-3 (Gliotactin homolog)	Q8BYM5	0.955	0.917
244	1. 9	Cell adhesion molecule 1 (Immunoglobulin superfamily member 4) (IgSF4) (Nectin-like protein 2) (NECL-2) (Spermatogenic immunoglobulin superfamily) (SgIgSF) (Synaptic cell adhesion molecule) (SynCAM) (Tumor suppressor in lung cancer 1) (TSLC-1)	Q8R5M8	0.949	0.99		*	*
245	1. 9	Cell adhesion molecule 3 (Immunoglobulin superfamily member 4B) (IgSF4B) (Nectin-like protein 1) (NECL-1) (Synaptic cell adhesion molecule 3) (TSLC1-like protein 1)	Q99N28	0.956	1.038			*
246	1. 9	Neurexin-1 (Neurexin I-alpha) (Neurexin-1-alpha)	Q9CS84	0.938	1.061		*
247	1. 9	MAGUK p55 subfamily member 6 (Dlgh4 protein) (P55T protein) (Protein associated with Lin-7 2)	Q9JLB0	0.995	0.963			*
248	1. 9	Band 4.1-like protein 3 (4.1B) (Differentially expressed in adenocarcinoma of the lung protein 1) (DAL-1) (DAL1P) (mDAL-1) [Cleaved into: Band 4.1-like protein 3, N-terminally processed]	Q9WV92	0.997	0.982			*
249	1. 9	Band 4.1-like protein 1 (Neuronal protein 4.1) (4.1N)	Q9Z2H5	1.046	0.98			*
250	1. 10	Annexin A5 (Anchorin CII) (Annexin V) (Annexin-5) (Calphobindin I) (CBP-I) (Endonexin II) (Lipocortin V) (Placental anticoagulant protein 4) (PP4) (Placental anticoagulant protein I) (PAP-I) (Thromboplastin inhibitor) (Vascular anticoagulant-alpha) (VAC-alpha)	P48036	0.8	0.916
251	1. 10	Alpha-centractin (Centractin) (ARP1) (Actin-RPV) (Centrosome-associated actin homolog)	P61164	1.117	0.99
252	1. 10	Casein kinase II subunit beta (CK II beta) (Phosvitin)	P67871	0.959	0.945			*
253	1. 10	Tubulin alpha-4A chain (Alpha-tubulin 4) (Alpha-tubulin isotype M-alpha-4) (Tubulin alpha-4 chain)	P68368	0.962	1.03			*
254	1. 10	14-3-3 protein eta	P68510	0.807	0.87
255	1. 10	Myosin regulatory light chain 12B (Myosin regulatory light chain 2-B, smooth muscle isoform) (Myosin regulatory light chain 20 kDa) (MLC20) (Myosin regulatory light chain MRLC2)	Q3THE2	0.96	0.942
256	1. 10	Casein kinase II subunit alpha (CK II alpha) (EC 2.7.11.1)	Q60737	1.053	1.008			*
257	1. 10	Voltage-dependent anion-selective channel protein 2 (VDAC-2) (mVDAC2) (Outer mitochondrial membrane protein porin 2) (Voltage-dependent anion-selective channel protein 6) (VDAC-6) (mVDAC6)	Q60930	0.893	1.161
258	1. 10	Fascin (Singed-like protein)	Q61553	0.977	0.925
259	1. 10	Ubiquitin thioesterase OTUB1 (EC 3.4.19.12) (Deubiquitinating enzyme OTUB1) (OTU domain-containing ubiquitin aldehyde-binding protein 1) (Otubain-1) (Ubiquitin-specific-processing protease OTUB1)	Q7TQI3	0.957	0.96
260	1. 10	Membrane-associated progesterone receptor component 2	Q80UU9	0.998	0.973
261	1. 10	COP9 signalosome complex subunit 8 (SGN8) (Signalosome subunit 8) (COP9 homolog) (JAB1-containing signalosome subunit 8)	Q8VBV7	0.932	0.846
262	1. 10	Protein FAM49B	Q921M7	0.974	0.968
263	1. 10	Synaptobrevin homolog YKT6 (EC 2.3.1.-)	Q9CQW1	1.026	0.964	*
264	1. 10	N(G),N(G)-dimethylarginine dimethylaminohydrolase 1 (DDAH-1) (Dimethylarginine dimethylaminohydrolase 1) (EC 3.5.3.18) (DDAHI) (Dimethylargininase-1)	Q9CWS0	1.07	1.078
265	1. 11	Gamma-aminobutyric acid receptor subunit gamma-2 (GABA(A) receptor subunit gamma-2)	P22723	0.931	1.136
266	1. 11	Serine/threonine-protein phosphatase 2B catalytic subunit beta isoform (EC 3.1.3.16) (CAM-PRP catalytic subunit) (Calmodulin-dependent calcineurin A subunit beta isoform)	P48453	1.018	0.974		*
267	1. 11	Gamma-aminobutyric acid receptor subunit alpha-1 (GABA(A) receptor subunit alpha-1)	P62812	0.906	1.111
268	1. 11	Gamma-aminobutyric acid receptor subunit beta-2 (GABA(A) receptor subunit beta-2)	P63137	1.032	1.085
269	1. 11	Serine/threonine-protein phosphatase 2B catalytic subunit alpha isoform (EC 3.1.3.16) (CAM-PRP catalytic subunit) (Calmodulin-dependent calcineurin A subunit alpha isoform)	P63328	1.02	0.945		*
270	1. 11	Calcineurin subunit B type 1 (Protein phosphatase 2B regulatory subunit 1) (Protein phosphatase 3 regulatory subunit B alpha isoform 1)	Q63810	0.877	0.893		*
271	1. 12	Protein bassoon	O88737	0.924	1.057	*	*	*
272	1. 12	ERC protein 2 (CAZ-associated structural protein 1) (CAST1)	Q6PH08	0.859	1.053	*	*	*
273	1. 12	Regulating synaptic membrane exocytosis protein 1 (Rab-3-interacting molecule 1) (RIM 1) (Rab-3-interacting protein 1)	Q99NE5	0.919	0.996	*	*
274	1. 12	Rap guanine nucleotide exchange factor 4 (Exchange factor directly activated by cAMP 2) (Exchange protein directly activated by cAMP 2) (EPAC 2) (cAMP-dependent Rap1 guanine-nucleotide exchange factor) (cAMP-regulated guanine nucleotide exchange factor II) (cAMP-GEFII)	Q9EQZ6	1.064	1.012	*	*
275	1. 12	Protein piccolo (Aczonin) (Brain-derived HLMN protein) (Multidomain presynaptic cytomatrix protein)	Q9QYX7	0.932	1.053	*	*
276	2. 1	Ketimine reductase mu-crystallin (EC 1.5.1.25) (NADP-regulated thyroid-hormone-binding protein)	O54983	0.991	0.995
277	2. 1	Nck-associated protein 1 (NAP 1) (Brain protein H19) (MH19) (Membrane-associated protein HEM-2) (p125Nap1)	P28660	1.048	0.937			*
278	2. 1	V-type proton ATPase catalytic subunit A (V-ATPase subunit A) (EC 3.6.3.14) (V-ATPase 69 kDa subunit) (Vacuolar proton pump subunit alpha)	P50516	1.044	0.941	*
279	2. 1	Aquaporin-4 (AQP-4) (Mercurial-insensitive water channel) (MIWC) (WCH4)	P55088	1.016	0.847
280	2. 1	Calcium uniporter protein, mitochondrial (Coiled-coil domain-containing protein 109A)	Q3UMR5	1.01	1.166
281	2. 1	Oxidation resistance protein 1 (Protein C7)	Q4KMM3	0.908	1.011
282	2. 1	Syntaxin-binding protein 5-like (Lethal(2) giant larvae protein homolog 4) (Tomosyn-2)	Q5DQR4	0.935	1.077
283	2. 1	Cytoplasmic FMR1-interacting protein 2 (p53-inducible protein 121)	Q5SQX6	1.037	0.907
284	2. 1	Voltage-dependent R-type calcium channel subunit alpha-1E (Brain calcium channel II) (BII) (Calcium channel, L type, alpha-1 polypeptide, isoform 6) (Voltage-gated calcium channel subunit alpha Cav2.3)	Q61290	1.009	1.051
285	2. 1	Cytoplasmic FMR1-interacting protein 1 (Specifically Rac1-associated protein 1) (Sra-1)	Q7TMB8	1.034	0.981			*
286	2. 1	D-beta-hydroxybutyrate dehydrogenase, mitochondrial (BDH) (EC 1.1.1.30) (3-hydroxybutyrate dehydrogenase)	Q80XN0	1.102	1.141
287	2. 1	Brain-specific angiogenesis inhibitor 1-associated protein 2 (BAI-associated protein 2) (BAI1-associated protein 2) (Insulin receptor substrate protein of 53 kDa) (IRSp53) (Insulin receptor substrate p53) (Insulin receptor tyrosine kinase 53 kDa substrate)	Q8BKX1	1.096	0.891			*
288	2. 1	DmX-like protein 2 (Rabconnectin-3)	Q8BPN8	1.015	1.013
289	2. 1	Septin-8	Q8CHH9	0.971	0.939
290	2. 1	Voltage-dependent L-type calcium channel subunit beta-4 (CAB4) (Calcium channel voltage-dependent subunit beta 4)	Q8R0S4	0.953	1.019
291	2. 1	Beta-centractin (Actin-related protein 1B) (ARP1B)	Q8R5C5	1.006	0.964
292	2. 1	SH3-containing GRB2-like protein 3-interacting protein 1 (Endophilin-3-interacting protein)	Q8VD37	1.013	0.972
293	2. 1	NAD-dependent protein deacetylase sirtuin-2 (EC 3.5.1.-) (Regulatory protein SIR2 homolog 2) (SIR2-like protein 2) (mSIR2L2)	Q8VDQ8	0.93	0.866
294	2. 1	WD repeat-containing protein 7 (TGF-beta resistance-associated protein TRAG)	Q920I9	1.047	1.016
295	2. 1	Tubulin beta-4A chain (Tubulin beta-4 chain)	Q9D6F9	0.959	0.979			*
296	2. 1	Serine/threonine-protein kinase DCLK1 (EC 2.7.11.1) (Doublecortin-like and CAM kinase-like 1) (Doublecortin-like kinase 1)	Q9JLM8	0.931	1.057
297	2. 1	Neurochondrin (M-Sema F-associating protein of 75 kDa) (Norbin)	Q9Z0E0	1.02	0.925
298	2. 1	LETM1 and EF-hand domain-containing protein 1, mitochondrial (Leucine zipper-EF-hand-containing transmembrane protein 1)	Q9Z2I0	1.069	1.141
299	2. 2	Myc box-dependent-interacting protein 1 (Amphiphysin II) (Amphiphysin-like protein) (Bridging integrator 1) (SH3 domain-containing protein 9)	O08539	0.933	0.898
300	2. 2	Charged multivesicular body protein 6 (Chromatin-modifying protein 6)	P0C0A3	0.815	0.96
301	2. 2	Protein kinase C alpha type (PKC-A) (PKC-alpha) (EC 2.7.11.13)	P20444	1.026	1.091		*
302	2. 2	Kinesin-like protein KIF2A (Kinesin-2)	P28740	0.993	1.024
303	2. 2	Dynamin-1 (EC 3.6.5.5)	P39053	1.066	0.98	*
304	2. 2	SH3 and multiple ankyrin repeat domains protein 3 (Shank3) (Proline-rich synapse-associated protein 2) (ProSAP2) (SPANK-2)	Q4ACU6	0.963	1.07
305	2. 2	Growth factor receptor-bound protein 2 (Adapter protein GRB2) (SH2/SH3 adapter GRB2)	Q60631	0.898	0.84
306	2. 2	Protein kinase C and casein kinase substrate in neurons protein 1 (Syndapin-1)	Q61644	0.999	0.939
307	2. 2	Endophilin-A2 (Endophilin-2) (SH3 domain protein 2B) (SH3 domain-containing GRB2-like protein 1) (SH3p8)	Q62419	0.914	0.858
308	2. 2	Endophilin-A1 (Endophilin-1) (SH3 domain protein 2A) (SH3 domain-containing GRB2-like protein 2) (SH3p4)	Q62420	0.989	0.903
309	2. 2	Mitochondrial fission factor	Q6PCP5	1.086	1.184
310	2. 2	Amphiphysin	Q7TQF7	0.981	0.929
311	2. 2	Engulfment and cell motility protein 2 (Protein ced-12 homolog A)	Q8BHL5	1.076	1.019
312	2. 2	CLIP-associating protein 2 (Cytoplasmic linker-associated protein 2)	Q8BRT1	0.993	1.055
313	2. 2	Dynamin-3 (EC 3.6.5.5)	Q8BZ98	0.997	0.887
314	2. 2	Synaptojanin-1 (EC 3.1.3.36) (Synaptic inositol 1,4,5-trisphosphate 5-phosphatase 1)	Q8CHC4	0.985	0.987
315	2. 2	Endophilin-B2 (SH3 domain-containing GRB2-like protein B2)	Q8R3V5	0.93	0.966
316	2. 2	Mitochondrial fission 1 protein (FIS1 homolog) (Tetratricopeptide repeat protein 11) (TPR repeat protein 11)	Q9CQ92	0.706	0.974
317	2. 2	Synaptojanin-2-binding protein (Activin receptor-interacting protein 2) (Activin receptor-interacting protein 4) (Mitochondrial outer membrane protein 25)	Q9D6K5	1.143	1.044
318	2. 2	Charged multivesicular body protein 4b (Chromatin-modifying protein 4b) (CHMP4b)	Q9D8B3	0.925	0.878
319	2. 2	Phosphatidylinositide phosphatase SAC1 (EC 3.1.3.-) (Suppressor of actin mutations 1-like protein)	Q9EP69	1.044	1.049
320	2. 2	Programmed cell death 6-interacting protein (ALG-2-interacting protein 1) (ALG-2-interacting protein X) (E2F1-inducible protein) (Eig2)	Q9WU78	0.999	0.936
321	2. 3	Clathrin light chain A (Lca)	O08585	0.699	0.893	*
322	2. 3	AP-1 complex subunit beta-1 (Adaptor protein complex AP-1 subunit beta-1) (Adaptor-related protein complex 1 subunit beta-1) (Beta-1-adaptin) (Beta-adaptin 1) (Clathrin assembly protein complex 1 beta large chain) (Golgi adaptor HA1/AP1 adaptin beta subunit)	O35643	1.088	0.978	*
323	2. 3	AP-3 complex subunit delta-1 (AP-3 complex subunit delta) (Adaptor-related protein complex 3 subunit delta-1) (Delta-adaptin) (mBLVR1)	O54774	1.056	1	*
324	2. 3	AP-2 complex subunit alpha-1 (100 kDa coated vesicle protein A) (Adaptor protein complex AP-2 subunit alpha-1) (Adaptor-related protein complex 2 subunit alpha-1) (Alpha-adaptin A) (Alpha1-adaptin) (Clathrin assembly protein complex 2 alpha-A large chain) (Plasma membrane adaptor HA2/AP2 adaptin alpha A subunit)	P17426	1.066	0.961	*
325	2. 3	AP-2 complex subunit alpha-2 (100 kDa coated vesicle protein C) (Adaptor protein complex AP-2 subunit alpha-2) (Adaptor-related protein complex 2 subunit alpha-2) (Alpha-adaptin C) (Alpha2-adaptin) (Clathrin assembly protein complex 2 alpha-C large chain) (Plasma membrane adaptor HA2/AP2 adaptin alpha C subunit)	P17427	1.072	0.967	*
326	2. 3	AP-2 complex subunit sigma (Adaptor protein complex AP-2 subunit sigma) (Adaptor-related protein complex 2 subunit sigma) (Clathrin assembly protein 2 sigma small chain) (Clathrin coat assembly protein AP17) (Clathrin coat-associated protein AP17) (Plasma membrane adaptor AP-2 17 kDa protein) (Sigma-adaptin 3b) (Sigma2-adaptin)	P62743	0.849	0.911	*
327	2. 3	AP-2 complex subunit mu (AP-2 mu chain) (Adaptor protein complex AP-2 subunit mu) (Adaptor-related protein complex 2 subunit mu) (Clathrin assembly protein complex 2 mu medium chain) (Clathrin coat assembly protein AP50) (Clathrin coat-associated protein AP50) (Mu2-adaptin) (Plasma membrane adaptor AP-2 50 kDa protein)	P84091	1.032	1	*
328	2. 3	Clathrin coat assembly protein AP180 (91 kDa synaptosomal-associated protein) (Clathrin coat-associated protein AP180) (Phosphoprotein F1-20)	Q61548	1.026	0.936
329	2. 3	Transferrin receptor protein 1 (TR) (TfR) (TfR1) (Trfr) (CD antigen CD71)	Q62351	1.074	1.046
330	2. 3	Clathrin heavy chain 1	Q68FD5	1.028	0.994	*
331	2. 3	Clathrin light chain B (Lcb)	Q6IRU5	0.804	0.81	*
332	2. 3	Putative tyrosine-protein phosphatase auxilin (EC 3.1.3.48) (DnaJ homolog subfamily C member 6)	Q80TZ3	1.117	0.987	*
333	2. 3	Epsin-1 (EPS-15-interacting protein 1) (Intersectin-EH-binding protein 1) (Ibp1)	Q80VP1	1.093	0.954
334	2. 3	Epsin-2 (EPS-15-interacting protein 2) (Intersectin-EH-binding protein 2) (Ibp2)	Q8CHU3	1.329	0.89
335	2. 3	Stromal membrane-associated protein 1	Q91VZ6	1.097	1.012
336	2. 3	Adaptin ear-binding coat-associated protein 1 (NECAP endocytosis-associated protein 1) (NECAP-1)	Q9CR95	0.933	0.957
337	2. 3	AP-2 complex subunit beta (AP105B) (Adaptor protein complex AP-2 subunit beta) (Adaptor-related protein complex 2 subunit beta) (Beta-2-adaptin) (Beta-adaptin) (Clathrin assembly protein complex 2 beta large chain) (Plasma membrane adaptor HA2/AP2 adaptin beta subunit)	Q9DBG3	1.096	0.926	*
338	2. 3	Intersectin-1 (EH and SH3 domains protein 1)	Q9Z0R4	1.05	1.021
339	2. 4	Protein-L-isoaspartate(D-aspartate) O-methyltransferase (PIMT) (EC 2.1.1.77) (L-isoaspartyl protein carboxyl methyltransferase) (Protein L-isoaspartyl/D-aspartyl methyltransferase) (Protein-beta-aspartate methyltransferase)	P23506	0.977	0.909
340	2. 4	Peptidyl-prolyl cis-trans isomerase FKBP2 (PPIase FKBP2) (EC 5.2.1.8) (13 kDa FK506-binding protein) (13 kDa FKBP) (FKBP-13) (FK506-binding protein 2) (FKBP-2) (Immunophilin FKBP13) (Rotamase)	P45878	0.856	0.92
341	2. 4	V-type proton ATPase subunit E 1 (V-ATPase subunit E 1) (V-ATPase 31 kDa subunit) (p31) (Vacuolar proton pump subunit E 1)	P50518	0.956	0.897	*
342	2. 4	V-type proton ATPase subunit d 1 (V-ATPase subunit d 1) (P39) (Physophilin) (V-ATPase 40 kDa accessory protein) (V-ATPase AC39 subunit) (Vacuolar proton pump subunit d 1)	P51863	0.629	0.813	*
343	2. 4	V-type proton ATPase subunit D (V-ATPase subunit D) (V-ATPase 28 kDa accessory protein) (Vacuolar proton pump subunit D)	P57746	1.038	0.909	*
344	2. 4	V-type proton ATPase subunit B, brain isoform (V-ATPase subunit B 2) (Endomembrane proton pump 58 kDa subunit) (Vacuolar proton pump subunit B 2)	P62814	1.06	0.95	*
345	2. 4	V-type proton ATPase 16 kDa proteolipid subunit (V-ATPase 16 kDa proteolipid subunit) (PL16) (Vacuolar proton pump 16 kDa proteolipid subunit)	P63082	1.104	0.683	*
346	2. 4	V-type proton ATPase subunit H (V-ATPase subunit H) (Vacuolar proton pump subunit H)	Q8BVE3	0.999	0.899	*
347	2. 4	Inorganic pyrophosphatase 2, mitochondrial (EC 3.6.1.1) (Pyrophosphate phospho-hydrolase 2) (PPase 2)	Q91VM9	1.172	1.137
348	2. 4	V-type proton ATPase subunit F (V-ATPase subunit F) (V-ATPase 14 kDa subunit) (Vacuolar proton pump subunit F)	Q9D1K2	0.881	0.954	*
349	2. 4	V-type proton ATPase subunit G 2 (V-ATPase subunit G 2) (V-ATPase 13 kDa subunit 2) (Vacuolar proton pump subunit G 2)	Q9WTT4	0.945	0.919	*
350	2. 4	V-type proton ATPase subunit C 1 (V-ATPase subunit C 1) (Vacuolar proton pump subunit C 1)	Q9Z1G3	1.033	0.896	*
351	2. 4	V-type proton ATPase 116 kDa subunit a isoform 1 (V-ATPase 116 kDa isoform a1) (Clathrin-coated vesicle/synaptic vesicle proton pump 116 kDa subunit) (Vacuolar adenosine triphosphatase subunit Ac116) (Vacuolar proton pump subunit 1) (Vacuolar proton translocating ATPase 116 kDa subunit a isoform 1)	Q9Z1G4	1.069	1.027	*
352	2. 5	Inositol monophosphatase 1 (IMP 1) (IMPase 1) (EC 3.1.3.25) (D-galactose 1-phosphate phosphatase) (EC 3.1.3.94) (Inositol-1(or 4)-monophosphatase 1) (Lithium-sensitive myo-inositol monophosphatase A1)	O55023	0.91	0.963
353	2. 5	Phosphatidylinositol 4-phosphate 5-kinase type-1 gamma (PIP5K1-gamma) (PtdIns(4)P-5-kinase 1 gamma) (EC 2.7.1.68) (Phosphatidylinositol 4-phosphate 5-kinase type I gamma) (PIP5KIgamma)	O70161	1.053	0.945
354	2. 5	Integrin alpha-V (Vitronectin receptor subunit alpha) (CD antigen CD51) [Cleaved into: Integrin alpha-V heavy chain; Integrin alpha-V light chain]	P43406	0.944	1.053
355	2. 5	ADP-ribosylation factor 6	P62331	0.999	1.007
356	2. 5	Talin-2	Q71LX4	1.047	1.017
357	2. 5	CDP-diacylglycerol--inositol 3-phosphatidyltransferase (EC 2.7.8.11) (Phosphatidylinositol synthase) (PI synthase) (PtdIns synthase)	Q8VDP6	0.82	0.945
358	2. 5	Phosphatidate cytidylyltransferase 2 (EC 2.7.7.41) (CDP-DAG synthase 2) (CDP-DG synthase 2) (CDP-diacylglycerol synthase 2) (CDS 2) (CDP-diglyceride pyrophosphorylase 2) (CDP-diglyceride synthase 2) (CTP:phosphatidate cytidylyltransferase 2)	Q99L43	1.079	1.02
359	2. 5	ADP-ribosylation factor GTPase-activating protein 1 (ARF GAP 1) (ADP-ribosylation factor 1 GTPase-activating protein) (ARF1 GAP) (ARF1-directed GTPase-activating protein)	Q9EPJ9	0.96	1.024
360	2. 5	1-phosphatidylinositol 4,5-bisphosphate phosphodiesterase beta-1 (EC 3.1.4.11) (PLC-154) (Phosphoinositide phospholipase C-beta-1) (Phospholipase C-beta-1) (PLC-beta-1)	Q9Z1B3	0.946	0.989
361	2. 6	Thy-1 membrane glycoprotein (Thy-1 antigen) (CD antigen CD90)	P01831	0.935	0.914	*	*	*
362	2. 6	Excitatory amino acid transporter 2 (GLT-1) (Sodium-dependent glutamate/aspartate transporter 2) (Solute carrier family 1 member 2)	P43006	0.877	1.051
363	2. 6	CD166 antigen (Activated leukocyte cell adhesion molecule) (Protein DM-GRASP) (CD antigen CD166)	Q61490	0.878	1.028
364	2. 6	Synaptophysin (BM89 antigen) (Major synaptic vesicle protein p38)	Q62277	1.247	0.923	*
365	2. 6	Secretory carrier-associated membrane protein 1 (Secretory carrier membrane protein 1)	Q8K021	0.994	0.99
366	2. 6	Synaptogyrin-3	Q8R191	1.09	0.962
367	2. 7	Flotillin-1	O08917	1.047	1.013
368	2. 7	PH and SEC7 domain-containing protein 3 (Exchange factor for ADP-ribosylation factor guanine nucleotide factor 6) (Pleckstrin homology and SEC7 domain-containing protein 3)	Q2PFD7	1.058	1.038
369	2. 7	Sorbin and SH3 domain-containing protein 2 (Arg/Abl-interacting protein 2) (ArgBP2)	Q3UTJ2	1.099	0.967
370	2. 7	Flotillin-2 (Epidermal surface antigen) (ESA) (Membrane component chromosome 17 surface marker 1 homolog)	Q60634	0.936	1.072
371	2. 7	Alpha-actinin-1 (Alpha-actinin cytoskeletal isoform) (F-actin cross-linking protein) (Non-muscle alpha-actinin-1)	Q7TPR4	1.147	0.952
372	3. 1	NADH dehydrogenase [ubiquinone] 1 beta subcomplex subunit 11, mitochondrial (Complex I-ESSS) (CI-ESSS) (NADH-ubiquinone oxidoreductase ESSS subunit) (Neuronal protein 15.6) (Np15.6) (p15.6)	O09111	1.034	1.092
373	3. 1	NADH dehydrogenase [ubiquinone] 1 beta subcomplex subunit 6 (Complex I-B17) (CI-B17) (NADH-ubiquinone oxidoreductase B17 subunit)	Q3UIU2	1.057	1.011
374	3. 1	Cytochrome c oxidase subunit NDUFA4	Q62425	0.94	1.179
375	3. 1	NADH dehydrogenase [ubiquinone] 1 alpha subcomplex subunit 12 (Complex I-B17.2) (CI-B17.2) (CIB17.2) (NADH-ubiquinone oxidoreductase subunit B17.2)	Q7TMF3	1.134	1.11
376	3. 1	Ubiquinone biosynthesis protein COQ9, mitochondrial	Q8K1Z0	1.033	1.245
377	3. 1	NADH dehydrogenase [ubiquinone] iron-sulfur protein 8, mitochondrial (EC 1.6.5.3) (EC 1.6.99.3) (Complex I-23kD) (CI-23kD) (NADH-ubiquinone oxidoreductase 23 kDa subunit)	Q8K3J1	0.881	1.156
378	3. 1	NADH-ubiquinone oxidoreductase 75 kDa subunit, mitochondrial (EC 1.6.5.3) (EC 1.6.99.3) (Complex I-75kD) (CI-75kD)	Q91VD9	1.085	1.185
379	3. 1	NADH dehydrogenase [ubiquinone] iron-sulfur protein 2, mitochondrial (EC 1.6.5.3) (EC 1.6.99.3) (Complex I-49kD) (CI-49kD) (NADH-ubiquinone oxidoreductase 49 kDa subunit)	Q91WD5	1.074	1.105
380	3. 1	CDGSH iron-sulfur domain-containing protein 1 (MitoNEET)	Q91WS0	0.991	1.047
381	3. 1	NADH dehydrogenase [ubiquinone] flavoprotein 1, mitochondrial (EC 1.6.5.3) (EC 1.6.99.3) (Complex I-51kD) (CI-51kD) (NADH-ubiquinone oxidoreductase 51 kDa subunit)	Q91YT0	1.086	1.203
382	3. 1	NADH dehydrogenase [ubiquinone] 1 alpha subcomplex subunit 10, mitochondrial (Complex I-42kD) (CI-42kD) (NADH-ubiquinone oxidoreductase 42 kDa subunit)	Q99LC3	1.141	1.192
383	3. 1	NADH dehydrogenase [ubiquinone] iron-sulfur protein 5 (Complex I-15 kDa) (CI-15 kDa) (NADH-ubiquinone oxidoreductase 15 kDa subunit) [Cleaved into: NADH dehydrogenase [ubiquinone] iron-sulfur protein 5, N-terminally processed]	Q99LY9	0.862	1.142
384	3. 1	NADH dehydrogenase [ubiquinone] 1 alpha subcomplex subunit 5 (Complex I subunit B13) (Complex I-13kD-B) (CI-13kD-B) (NADH-ubiquinone oxidoreductase 13 kDa-B subunit)	Q9CPP6	0.927	1.163
385	3. 1	ATP synthase subunit g, mitochondrial (ATPase subunit g)	Q9CPQ8	0.827	1.073
386	3. 1	NADH dehydrogenase [ubiquinone] 1 subunit C2 (Complex I-B14.5b) (CI-B14.5b) (NADH-ubiquinone oxidoreductase subunit B14.5b)	Q9CQ54	0.942	1.076
387	3. 1	Cytochrome b-c1 complex subunit 8 (Complex III subunit 8) (Complex III subunit VIII) (Ubiquinol-cytochrome c reductase complex 9.5 kDa protein) (Ubiquinol-cytochrome c reductase complex ubiquinone-binding protein QP-C)	Q9CQ69	0.888	1.05
388	3. 1	NADH dehydrogenase [ubiquinone] 1 alpha subcomplex subunit 2 (Complex I-B8) (CI-B8) (NADH-ubiquinone oxidoreductase B8 subunit)	Q9CQ75	0.926	1.246
389	3. 1	NADH dehydrogenase [ubiquinone] 1 beta subcomplex subunit 4 (Complex I-B15) (CI-B15) (NADH-ubiquinone oxidoreductase B15 subunit)	Q9CQC7	0.982	1.049
390	3. 1	NADH dehydrogenase [ubiquinone] 1 beta subcomplex subunit 5, mitochondrial (Complex I-SGDH) (CI-SGDH) (NADH-ubiquinone oxidoreductase SGDH subunit)	Q9CQH3	0.793	1.102
391	3. 1	NADH dehydrogenase [ubiquinone] 1 beta subcomplex subunit 9 (Complex I-B22) (CI-B22) (NADH-ubiquinone oxidoreductase B22 subunit)	Q9CQJ8	0.963	1.078
392	3. 1	Acyl-coenzyme A thioesterase 13 (Acyl-CoA thioesterase 13) (EC 3.1.2.-) (Thioesterase superfamily member 2) [Cleaved into: Acyl-coenzyme A thioesterase 13, N-terminally processed]	Q9CQR4	1.065	1.213
393	3. 1	NADH dehydrogenase [ubiquinone] 1 alpha subcomplex subunit 6 (Complex I-B14) (CI-B14) (NADH-ubiquinone oxidoreductase B14 subunit)	Q9CQZ5	1.017	1.199
394	3. 1	NADH dehydrogenase [ubiquinone] 1 beta subcomplex subunit 3 (Complex I-B12) (CI-B12) (NADH-ubiquinone oxidoreductase B12 subunit)	Q9CQZ6	1.016	1.196
395	3. 1	NADH dehydrogenase [ubiquinone] iron-sulfur protein 4, mitochondrial (Complex I-18 kDa) (CI-18 kDa) (Complex I-AQDQ) (CI-AQDQ) (NADH-ubiquinone oxidoreductase 18 kDa subunit)	Q9CXZ1	0.877	1.106
396	3. 1	Mitochondrial pyruvate carrier 2 (Brain protein 44)	Q9D023	0.978	1.101
397	3. 1	ES1 protein homolog, mitochondrial	Q9D172	1.147	1.214
398	3. 1	NADH dehydrogenase [ubiquinone] 1 beta subcomplex subunit 8, mitochondrial (Complex I-ASHI) (CI-ASHI) (NADH-ubiquinone oxidoreductase ASHI subunit)	Q9D6J5	0.942	1.067
399	3. 1	NADH dehydrogenase [ubiquinone] flavoprotein 2, mitochondrial (EC 1.6.5.3) (EC 1.6.99.3) (NADH-ubiquinone oxidoreductase 24 kDa subunit)	Q9D6J6	1.04	1.075
400	3. 1	NADH dehydrogenase [ubiquinone] iron-sulfur protein 7, mitochondrial (EC 1.6.5.3) (EC 1.6.99.3) (Complex I-20kD) (CI-20kD) (NADH-ubiquinone oxidoreductase 20 kDa subunit)	Q9DC70	1.087	1.183
401	3. 1	NADH dehydrogenase [ubiquinone] 1 alpha subcomplex subunit 8 (Complex I-19kD) (CI-19kD) (Complex I-PGIV) (CI-PGIV) (NADH-ubiquinone oxidoreductase 19 kDa subunit)	Q9DCJ5	0.974	1.236
402	3. 1	NADH dehydrogenase [ubiquinone] 1 beta subcomplex subunit 10 (Complex I-PDSW) (CI-PDSW) (NADH-ubiquinone oxidoreductase PDSW subunit)	Q9DCS9	1.078	1.12
403	3. 1	NADH dehydrogenase [ubiquinone] 1 alpha subcomplex subunit 13 (Cell death regulatory protein GRIM-19) (Complex I-B16.6) (CI-B16.6) (Gene associated with retinoic and interferon-induced mortality 19 protein) (GRIM-19) (Gene associated with retinoic and IFN-induced mortality 19 protein) (NADH-ubiquinone oxidoreductase B16.6 subunit)	Q9ERS2	1.052	1.164
404	3. 1	NADH dehydrogenase [ubiquinone] 1 alpha subcomplex subunit 7 (Complex I-B14.5a) (CI-B14.5a) (NADH-ubiquinone oxidoreductase subunit B14.5a)	Q9Z1P6	1.058	1.134
405	3. 2	ATPase inhibitor, mitochondrial (Inhibitor of F(1)F(o)-ATPase) (IF(1)) (IF1)	O35143	0.763	1.074
406	3. 2	Complement component 1 Q subcomponent-binding protein, mitochondrial (GC1q-R protein) (Glycoprotein gC1qBP) (C1qBP)	O35658	0.946	1.141
407	3. 2	Cytochrome c oxidase subunit 2 (Cytochrome c oxidase polypeptide II)	P00405	0.887	1.094
408	3. 2	ATP synthase protein 8 (A6L) (F-ATPase subunit 8)	P03930	0.809	1.019
409	3. 2	Cytochrome c oxidase subunit 5A, mitochondrial (Cytochrome c oxidase polypeptide Va)	P12787	0.746	1.047
410	3. 2	Cytochrome c oxidase subunit 7C, mitochondrial (Cytochrome c oxidase polypeptide VIIc)	P17665	0.677	0.872
411	3. 2	Cytochrome c oxidase subunit 5B, mitochondrial (Cytochrome c oxidase polypeptide Vb)	P19536	0.874	1.106
412	3. 2	Cytochrome c oxidase subunit 4 isoform 1, mitochondrial (Cytochrome c oxidase polypeptide IV) (Cytochrome c oxidase subunit IV isoform 1) (COX IV-1)	P19783	0.984	1.078
413	3. 2	Transcription factor A, mitochondrial (mtTFA) (Testis-specific high mobility group protein) (TS-HMG)	P40630	0.906	1.19
414	3. 2	Cytochrome c oxidase subunit 6A1, mitochondrial (Cytochrome c oxidase polypeptide VIa-liver)	P43024	1.022	1.13
415	3. 2	ATP synthase subunit epsilon, mitochondrial (ATPase subunit epsilon)	P56382	0.825	1.217
416	3. 2	Cytochrome c oxidase subunit 6B1 (Cytochrome c oxidase subunit VIb isoform 1) (COX VIb-1)	P56391	0.832	1.275
417	3. 2	ATP synthase subunit beta, mitochondrial (EC 3.6.3.14)	P56480	1.09	1.193
418	3. 2	Cytochrome c, somatic	P62897	1.124	1.192
419	3. 2	ATP synthase-coupling factor 6, mitochondrial (ATPase subunit F6)	P97450	0.486	1.227
420	3. 2	ATP synthase subunit alpha, mitochondrial	Q03265	1.114	1.245
421	3. 2	ATP synthase subunit e, mitochondrial (ATPase subunit e)	Q06185	0.786	1.013
422	3. 2	Phosphate carrier protein, mitochondrial (Phosphate transport protein) (PTP) (Solute carrier family 25 member 3)	Q8VEM8	1.094	1.153
423	3. 2	ATP synthase subunit gamma, mitochondrial (F-ATPase gamma subunit)	Q91VR2	1.059	1.171
424	3. 2	Peptidyl-prolyl cis-trans isomerase F, mitochondrial (PPIase F) (EC 5.2.1.8) (Cyclophilin D) (CyP-D) (CypD) (Cyclophilin F) (Rotamase F)	Q99KR7	1.012	1.173
425	3. 2	Cytochrome c oxidase subunit 6C (Cytochrome c oxidase polypeptide VIc)	Q9CPQ1	0.635	0.92
426	3. 2	Succinate dehydrogenase [ubiquinone] iron-sulfur subunit, mitochondrial (EC 1.3.5.1) (Iron-sulfur subunit of complex II) (Ip)	Q9CQA3	1.109	1.162
427	3. 2	ATP synthase F(0) complex subunit B1, mitochondrial (ATP synthase subunit b) (ATPase subunit b)	Q9CQQ7	0.932	1.132
428	3. 2	Cytochrome b-c1 complex subunit Rieske, mitochondrial (EC 1.10.2.2) (Complex III subunit 5) (Cytochrome b-c1 complex subunit 5) (Rieske iron-sulfur protein) (RISP) (Ubiquinol-cytochrome c reductase iron-sulfur subunit) [Cleaved into: Cytochrome b-c1 complex subunit 11 (Complex III subunit IX) (Ubiquinol-cytochrome c reductase 8 kDa protein)]	Q9CR68	1.021	1.099
429	3. 2	Cytochrome c1, heme protein, mitochondrial (Complex III subunit 4) (Complex III subunit IV) (Cytochrome b-c1 complex subunit 4) (Ubiquinol-cytochrome-c reductase complex cytochrome c1 subunit) (Cytochrome c-1)	Q9D0M3	1.034	1.097
430	3. 2	ATP synthase subunit delta, mitochondrial (F-ATPase delta subunit)	Q9D3D9	0.884	1.011
431	3. 2	Cytochrome b-c1 complex subunit 7 (Complex III subunit 7) (Complex III subunit VII) (Ubiquinol-cytochrome c reductase complex 14 kDa protein)	Q9D855	0.896	1.189
432	3. 2	NADH-cytochrome b5 reductase 1 (b5R.1) (EC 1.6.2.2) (NAD(P)H:quinone oxidoreductase type 3 polypeptide A2)	Q9DB73	1.064	1.044
433	3. 2	Cytochrome b-c1 complex subunit 2, mitochondrial (Complex III subunit 2) (Core protein II) (Ubiquinol-cytochrome-c reductase complex core protein 2)	Q9DB77	1.065	1.128
434	3. 2	ATP synthase subunit d, mitochondrial (ATPase subunit d)	Q9DCX2	0.991	1.226
435	3. 3	Prohibitin-2 (B-cell receptor-associated protein BAP37) (Repressor of estrogen receptor activity)	O35129	1.044	1.143
436	3. 3	Phospholipid hydroperoxide glutathione peroxidase, mitochondrial (PHGPx) (EC 1.11.1.12) (Glutathione peroxidase 4) (GPx-4) (GSHPx-4)	O70325	0.978	1.067
437	3. 3	ATP-dependent Clp protease proteolytic subunit, mitochondrial (EC 3.4.21.92) (Endopeptidase Clp)	O88696	1.077	1.199
438	3. 3	Superoxide dismutase [Mn], mitochondrial (EC 1.15.1.1)	P09671	1.161	1.232
439	3. 3	Thioredoxin-dependent peroxide reductase, mitochondrial (EC 1.11.1.15) (Antioxidant protein 1) (AOP-1) (PRX III) (Perioredoxin-3) (Protein MER5)	P20108	1.091	1.118
440	3. 3	Cytochrome c oxidase subunit 7A2, mitochondrial (Cytochrome c oxidase subunit VIIa-liver/heart) (Cytochrome c oxidase subunit VIIa-L)	P48771	0.692	1.003
441	3. 3	NADH dehydrogenase [ubiquinone] iron-sulfur protein 6, mitochondrial (Complex I-13kD-A) (CI-13kD-A) (NADH-ubiquinone oxidoreductase 13 kDa-A subunit)	P52503	0.876	1.07
442	3. 3	6.8 kDa mitochondrial proteolipid	P56379	0.98	1.029
443	3. 3	Mitochondrial import inner membrane translocase subunit Tim10	P62073	0.896	1.193
444	3. 3	Prohibitin (B-cell receptor-associated protein 32) (BAP 32)	P67778	0.991	1.151
445	3. 3	Peroxiredoxin-5, mitochondrial (EC 1.11.1.15) (Antioxidant enzyme B166) (AOEB166) (Liver tissue 2D-page spot 2D-0014IV) (PLP) (Peroxiredoxin V) (Prx-V) (Peroxisomal antioxidant enzyme) (Thioredoxin peroxidase PMP20) (Thioredoxin reductase)	P99029	0.997	1.106
446	3. 3	Up-regulated during skeletal muscle growth protein 5 (Diabetes-associated protein in insulin-sensitive tissues)	Q78IK2	0.971	0.954
447	3. 3	Protein DJ-1 (EC 3.4.-.-) (Parkinson disease protein 7 homolog)	Q99LX0	0.917	0.907
448	3. 3	Mitochondrial 2-oxoglutarate/malate carrier protein (OGCP) (Solute carrier family 25 member 11)	Q9CR62	1.109	1.118
449	3. 3	Cytochrome b-c1 complex subunit 1, mitochondrial (Complex III subunit 1) (Core protein I) (Ubiquinol-cytochrome-c reductase complex core protein 1)	Q9CZ13	1.09	1.232
450	3. 3	ATP synthase subunit O, mitochondrial (Oligomycin sensitivity conferral protein) (OSCP)	Q9DB20	1.057	1.162
451	3. 3	NADH dehydrogenase [ubiquinone] 1 alpha subcomplex subunit 9, mitochondrial (Complex I-39kD) (CI-39kD) (NADH-ubiquinone oxidoreductase 39 kDa subunit)	Q9DC69	1.101	1.17
452	3. 3	NADH dehydrogenase [ubiquinone] iron-sulfur protein 3, mitochondrial (EC 1.6.5.3) (EC 1.6.99.3) (Complex I-30kD) (CI-30kD) (NADH-ubiquinone oxidoreductase 30 kDa subunit)	Q9DCT2	1.042	1.142
453	3. 3	Glutaredoxin-1 (Thioltransferase-1) (TTase-1)	Q9QUH0	1.003	0.865
454	4. 1	Dihydrolipoyl dehydrogenase, mitochondrial (EC 1.8.1.4) (Dihydrolipoamide dehydrogenase)	O08749	1.062	1.193
455	4. 1	Aspartate aminotransferase, mitochondrial (mAspAT) (EC 2.6.1.1) (EC 2.6.1.7) (Fatty acid-binding protein) (FABP-1) (Glutamate oxaloacetate transaminase 2) (Kynurenine aminotransferase 4) (Kynurenine aminotransferase IV) (Kynurenine--oxoglutarate transaminase 4) (Kynurenine--oxoglutarate transaminase IV) (Plasma membrane-associated fatty acid-binding protein) (FABPpm) (Transaminase A)	P05202	1.171	1.203
456	4. 1	Malate dehydrogenase, mitochondrial (EC 1.1.1.37)	P08249	1.148	1.195
457	4. 1	Glutamate dehydrogenase 1, mitochondrial (GDH 1) (EC 1.4.1.3)	P26443	1.08	1.301
458	4. 1	Pyruvate dehydrogenase E1 component subunit alpha, somatic form, mitochondrial (EC 1.2.4.1) (PDHE1-A type I)	P35486	1.122	1.202
459	4. 1	Lipoamide acyltransferase component of branched-chain alpha-keto acid dehydrogenase complex, mitochondrial (EC 2.3.1.168) (Branched-chain alpha-keto acid dehydrogenase complex component E2) (BCKAD-E2) (BCKADE2) (Dihydrolipoamide acetyltransferase component of branched-chain alpha-keto acid dehydrogenase complex) (Dihydrolipoamide branched chain transacylase) (Dihydrolipoyllysine-residue (2-methyl…	P53395	1.095	1.181
460	4. 1	Isocitrate dehydrogenase [NADP], mitochondrial (IDH) (EC 1.1.1.42) (ICD-M) (IDP) (NADP(+)-specific ICDH) (Oxalosuccinate decarboxylase)	P54071	1.186	1.351
461	4. 1	Isocitrate dehydrogenase [NAD] subunit gamma 1, mitochondrial (EC 1.1.1.41) (Isocitric dehydrogenase subunit gamma) (NAD(+)-specific ICDH subunit gamma)	P70404	1.095	1.125
462	4. 1	Fumarate hydratase, mitochondrial (Fumarase) (EC 4.2.1.2) (EF-3)	P97807	1.119	1.186
463	4. 1	Pyruvate carboxylase, mitochondrial (EC 6.4.1.1) (Pyruvic carboxylase) (PCB)	Q05920	1.08	1.139
464	4. 1	2-oxoglutarate dehydrogenase, mitochondrial (EC 1.2.4.2) (2-oxoglutarate dehydrogenase complex component E1) (OGDC-E1) (Alpha-ketoglutarate dehydrogenase)	Q60597	1.07	1.223
465	4. 1	Voltage-dependent anion-selective channel protein 3 (VDAC-3) (mVDAC3) (Outer mitochondrial membrane protein porin 3)	Q60931	0.953	1.146
466	4. 1	Phosphoenolpyruvate carboxykinase [GTP], mitochondrial (PEPCK-M) (EC 4.1.1.32)	Q8BH04	1.101	1.177
467	4. 1	Pyruvate dehydrogenase protein X component, mitochondrial (Dihydrolipoamide dehydrogenase-binding protein of pyruvate dehydrogenase complex) (Lipoyl-containing pyruvate dehydrogenase complex component X)	Q8BKZ9	1.047	1.165
468	4. 1	NADP-dependent malic enzyme, mitochondrial (NADP-ME) (EC 1.1.1.40) (Malic enzyme 3)	Q8BMF3	1.05	1.109
469	4. 1	Dihydrolipoyllysine-residue acetyltransferase component of pyruvate dehydrogenase complex, mitochondrial (EC 2.3.1.12) (Dihydrolipoamide acetyltransferase component of pyruvate dehydrogenase complex) (Pyruvate dehydrogenase complex component E2) (PDC-E2) (PDCE2)	Q8BMF4	1.121	1.145
470	4. 1	Succinate-semialdehyde dehydrogenase, mitochondrial (EC 1.2.1.24) (Aldehyde dehydrogenase family 5 member A1) (NAD(+)-dependent succinic semialdehyde dehydrogenase)	Q8BWF0	1.116	1.2
471	4. 1	Succinate dehydrogenase [ubiquinone] flavoprotein subunit, mitochondrial (EC 1.3.5.1) (Flavoprotein subunit of complex II) (Fp)	Q8K2B3	1.101	1.203
472	4. 1	[Pyruvate dehydrogenase (acetyl-transferring)] kinase isozyme 3, mitochondrial (EC 2.7.11.2) (Pyruvate dehydrogenase kinase isoform 3)	Q922H2	1.086	1.149
473	4. 1	Aconitate hydratase, mitochondrial (Aconitase) (EC 4.2.1.3) (Citrate hydro-lyase)	Q99KI0	1.138	1.231
474	4. 1	Citrate synthase, mitochondrial (EC 2.3.3.1) (Citrate (Si)-synthase)	Q9CZU6	1.131	1.175
475	4. 1	Pyruvate dehydrogenase E1 component subunit beta, mitochondrial (PDHE1-B) (EC 1.2.4.1)	Q9D051	1.087	1.207
476	4. 1	Dihydrolipoyllysine-residue succinyltransferase component of 2-oxoglutarate dehydrogenase complex, mitochondrial (EC 2.3.1.61) (2-oxoglutarate dehydrogenase complex component E2) (OGDC-E2) (Dihydrolipoamide succinyltransferase component of 2-oxoglutarate dehydrogenase complex) (E2K)	Q9D2G2	1.077	1.229
477	4. 1	Isocitrate dehydrogenase [NAD] subunit alpha, mitochondrial (EC 1.1.1.41) (Isocitric dehydrogenase subunit alpha) (NAD(+)-specific ICDH subunit alpha)	Q9D6R2	1.086	1.187
478	4. 1	Succinyl-CoA ligase [ADP/GDP-forming] subunit alpha, mitochondrial (EC 6.2.1.4) (EC 6.2.1.5) (Succinyl-CoA synthetase subunit alpha) (SCS-alpha)	Q9WUM5	1.036	1.14
479	4. 1	Succinyl-CoA ligase [ADP-forming] subunit beta, mitochondrial (EC 6.2.1.5) (ATP-specific succinyl-CoA synthetase subunit beta) (Succinyl-CoA synthetase beta-A chain) (SCS-betaA)	Q9Z2I9	1.08	1.159
480	4. 2	Fructose-bisphosphate aldolase C (EC 4.1.2.13) (Aldolase 3) (Brain-type aldolase) (Scrapie-responsive protein 2) (Zebrin II)	P05063	1.069	1.068	*
481	4. 2	Fructose-bisphosphate aldolase A (EC 4.1.2.13) (Aldolase 1) (Muscle-type aldolase)	P05064	1.053	0.875	*
482	4. 2	Glucose-6-phosphate isomerase (GPI) (EC 5.3.1.9) (Autocrine motility factor) (AMF) (Neuroleukin) (NLK) (Phosphoglucose isomerase) (PGI) (Phosphohexose isomerase) (PHI)	P06745	1.035	0.923	*
483	4. 2	Phosphoglycerate kinase 1 (EC 2.7.2.3)	P09411	1.03	0.922	*
484	4. 2	ATP-dependent 6-phosphofructokinase, liver type (ATP-PFK) (PFK-L) (EC 2.7.1.11) (6-phosphofructokinase type B) (Phosphofructo-1-kinase isozyme B) (PFK-B) (Phosphohexokinase)	P12382	1.044	0.986
485	4. 2	Glyceraldehyde-3-phosphate dehydrogenase (GAPDH) (EC 1.2.1.12) (Peptidyl-cysteine S-nitrosylase GAPDH) (EC 2.6.99.-)	P16858	0.986	0.965	*
486	4. 2	Alpha-enolase (EC 4.2.1.11) (2-phospho-D-glycerate hydro-lyase) (Enolase 1) (Non-neural enolase) (NNE)	P17182	1.026	0.973	*
487	4. 2	Gamma-enolase (EC 4.2.1.11) (2-phospho-D-glycerate hydro-lyase) (Enolase 2) (Neural enolase) (Neuron-specific enolase) (NSE)	P17183	1.037	0.926	*
488	4. 2	Hexokinase-1 (EC 2.7.1.1) (Hexokinase type I) (HK I) (Hexokinase, tumor isozyme)	P17710	1.185	1.155
489	4. 2	Triosephosphate isomerase (TIM) (EC 5.3.1.1) (Triose-phosphate isomerase)	P17751	0.978	0.919	*
490	4. 2	Transketolase (TK) (EC 2.2.1.1) (P68)	P40142	0.93	0.985
491	4. 2	ATP-dependent 6-phosphofructokinase, muscle type (ATP-PFK) (PFK-M) (EC 2.7.1.11) (6-phosphofructokinase type A) (Phosphofructo-1-kinase isozyme A) (PFK-A) (Phosphohexokinase)	P47857	0.993	1.019	*
492	4. 2	Pyruvate kinase PKM (EC 2.7.1.40) (Pyruvate kinase muscle isozyme)	P52480	0.997	0.928	*
493	4. 2	Phosphatidylethanolamine-binding protein 1 (PEBP-1) (HCNPpp) [Cleaved into: Hippocampal cholinergic neurostimulating peptide (HCNP)]	P70296	0.8	0.825
494	4. 2	Glucose-6-phosphate 1-dehydrogenase X (G6PD) (EC 1.1.1.49)	Q00612	0.903	0.943
495	4. 2	Glycogen phosphorylase, brain form (EC 2.4.1.1)	Q8CI94	1.015	1.084
496	4. 2	UTP--glucose-1-phosphate uridylyltransferase (EC 2.7.7.9) (UDP-glucose pyrophosphorylase) (UDPGP) (UGPase)	Q91ZJ5	0.978	1.02
497	4. 2	Transaldolase (EC 2.2.1.2)	Q93092	1.054	0.866
498	4. 2	Phosphoglucomutase-1 (PGM 1) (EC 5.4.2.2) (Glucose phosphomutase 1) (Phosphoglucomutase-2)	Q9D0F9	1.006	0.997
499	4. 2	Phosphoglycerate mutase 1 (EC 3.1.3.13) (EC 5.4.2.11) (EC 5.4.2.4) (BPG-dependent PGAM 1) (Phosphoglycerate mutase isozyme B) (PGAM-B)	Q9DBJ1	0.936	0.878	*
500	4. 2	6-phosphogluconate dehydrogenase, decarboxylating (EC 1.1.1.44)	Q9DCD0	0.991	0.972
501	4. 2	Destrin (Actin-depolymerizing factor) (ADF) (Sid 23)	Q9R0P5	0.833	0.972
502	4. 2	Adenylate kinase isoenzyme 1 (AK 1) (EC 2.7.4.3) (EC 2.7.4.6) (ATP-AMP transphosphorylase 1) (ATP:AMP phosphotransferase) (Adenylate monophosphate kinase) (Myokinase)	Q9R0Y5	1.015	0.967
503	4. 2	ATP-dependent 6-phosphofructokinase, platelet type (ATP-PFK) (PFK-P) (EC 2.7.1.11) (6-phosphofructokinase type C) (Phosphofructo-1-kinase isozyme C) (PFK-C) (Phosphohexokinase)	Q9WUA3	0.974	1.016	*
504	4. 2	Glycogen phosphorylase, muscle form (EC 2.4.1.1) (Myophosphorylase)	Q9WUB3	1.124	1.082
505	4. 3	Hypoxanthine-guanine phosphoribosyltransferase (HGPRT) (HGPRTase) (EC 2.4.2.8) (HPRT B)	P00493	1.011	0.891
506	4. 3	L-lactate dehydrogenase A chain (LDH-A) (EC 1.1.1.27) (LDH muscle subunit) (LDH-M)	P06151	1.083	0.876	*
507	4. 3	Peptidyl-prolyl cis-trans isomerase A (PPIase A) (EC 5.2.1.8) (Cyclophilin A) (Cyclosporin A-binding protein) (Rotamase A) (SP18) [Cleaved into: Peptidyl-prolyl cis-trans isomerase A, N-terminally processed]	P17742	0.876	0.849
508	4. 3	Dynamin-like 120 kDa protein, mitochondrial (EC 3.6.5.5) (Large GTP-binding protein) (LargeG) (Optic atrophy protein 1 homolog) [Cleaved into: Dynamin-like 120 kDa protein, form S1]	P58281	1.06	1.15
509	4. 3	Dynamin-1-like protein (EC 3.6.5.5) (Dynamin family member proline-rich carboxyl-terminal domain less) (Dymple) (Dynamin-related protein 1)	Q8K1M6	1.034	0.954
510	4. 3	Guanine deaminase (Guanase) (Guanine aminase) (EC 3.5.4.3) (Guanine aminohydrolase) (GAH)	Q9R111	1.045	0.918
511	4. 3	Apoptosis-inducing factor 1, mitochondrial (EC 1.1.1.-) (Programmed cell death protein 8)	Q9Z0X1	1.067	1.111
512	4. 4	Glycerol-3-phosphate dehydrogenase [NAD(+)], cytoplasmic (GPD-C) (GPDH-C) (EC 1.1.1.8)	P13707	1.051	0.942
513	4. 4	Fatty acid synthase (EC 2.3.1.85) [Includes: [Acyl-carrier-protein] S-acetyltransferase (EC 2.3.1.38); [Acyl-carrier-protein] S-malonyltransferase (EC 2.3.1.39); 3-oxoacyl-[acyl-carrier-protein] synthase (EC 2.3.1.41); 3-oxoacyl-[acyl-carrier-protein] reductase (EC 1.1.1.100); 3-hydroxyacyl-[acyl-carrier-protein] dehydratase (EC 4.2.1.59); Enoyl-[acyl-carrier-protein] reductase (EC 1.3.1.39); Ole…	P19096	0.972	0.981
514	4. 4	Glycerol-3-phosphate dehydrogenase 1-like protein (EC 1.1.1.8)	Q3ULJ0	1.037	0.942
515	4. 4	Glycerol kinase (GK) (Glycerokinase) (EC 2.7.1.30) (ATP:glycerol 3-phosphotransferase)	Q64516	1.075	1.163
516	4. 4	Glycerol-3-phosphate dehydrogenase, mitochondrial (GPD-M) (GPDH-M) (EC 1.1.5.3) (Protein TISP38)	Q64521	1.049	1.164
517	4. 5	Glutaredoxin-related protein 5, mitochondrial (Monothiol glutaredoxin-5)	Q80Y14	0.947	1.079
518	4. 5	Hydroxyacylglutathione hydrolase, mitochondrial (EC 3.1.2.6) (Glyoxalase II) (Glx II)	Q99KB8	0.948	0.955
519	4. 5	Iron-sulfur cluster assembly 2 homolog, mitochondrial (HESB-like domain-containing protein 1)	Q9DCB8	1.065	1.045
520	4. 5	Cysteine desulfurase, mitochondrial (m-Nfs1) (EC 2.8.1.7)	Q9Z1J3	1.039	1.073
521	4. 6	Sorting and assembly machinery component 50 homolog	Q8BGH2	1.044	1.129
522	4. 6	MICOS complex subunit Mic60 (Mitochondrial inner membrane protein) (Mitofilin)	Q8CAQ8	1.072	1.221
523	4. 6	MICOS complex subunit Mic19 (Coiled-coil-helix-coiled-coil-helix domain-containing protein 3)	Q9CRB9	0.923	1.165
524	4. 6	Mitochondrial import receptor subunit TOM40 homolog (Mitochondrial outer membrane protein of 35 kDa) (MOM35) (Protein Haymaker) (Translocase of outer membrane 40 kDa subunit homolog)	Q9QYA2	1.012	1.071
525	5. 1	3-hydroxyacyl-CoA dehydrogenase type-2 (EC 1.1.1.35) (17-beta-hydroxysteroid dehydrogenase 10) (17-beta-HSD 10) (EC 1.1.1.51) (3-hydroxy-2-methylbutyryl-CoA dehydrogenase) (EC 1.1.1.178) (3-hydroxyacyl-CoA dehydrogenase type II) (Endoplasmic reticulum-associated amyloid beta-peptide-binding protein) (Mitochondrial ribonuclease P protein 2) (Mitochondrial RNase P protein 2) (Type II HADH)	O08756	1.017	1.107
526	5. 1	Enoyl-CoA delta isomerase 1, mitochondrial (EC 5.3.3.8) (3,2-trans-enoyl-CoA isomerase) (Delta(3),Delta(2)-enoyl-CoA isomerase) (D3,D2-enoyl-CoA isomerase) (Dodecenoyl-CoA isomerase)	P42125	1.1	1.22
527	5. 1	Calretinin (CR)	Q08331	0.956	0.855
528	5. 1	Hydroxyacyl-coenzyme A dehydrogenase, mitochondrial (HCDH) (EC 1.1.1.35) (Medium and short-chain L-3-hydroxyacyl-coenzyme A dehydrogenase) (Short-chain 3-hydroxyacyl-CoA dehydrogenase)	Q61425	1.196	1.323
529	5. 1	MAP kinase-activating death domain protein (Rab3 GDP/GTP exchange factor)	Q80U28	1.047	1.029
530	5. 1	Trifunctional enzyme subunit alpha, mitochondrial (TP-alpha) [Includes: Long-chain enoyl-CoA hydratase (EC 4.2.1.17); Long chain 3-hydroxyacyl-CoA dehydrogenase (EC 1.1.1.211)]	Q8BMS1	1.047	1.261
531	5. 1	3-ketoacyl-CoA thiolase, mitochondrial (EC 2.3.1.16) (Acetyl-CoA acyltransferase) (Beta-ketothiolase) (Mitochondrial 3-oxoacyl-CoA thiolase)	Q8BWT1	1.069	1.123
532	5. 1	Acyl-CoA dehydrogenase family member 9, mitochondrial (ACAD-9) (EC 1.3.99.-)	Q8JZN5	1.051	1.124
533	5. 1	Acetyl-CoA acetyltransferase, mitochondrial (EC 2.3.1.9) (Acetoacetyl-CoA thiolase)	Q8QZT1	1.116	1.224
534	5. 1	Carbonyl reductase family member 4 (EC 1.-.-.-) (3-oxoacyl-[acyl-carrier-protein] reductase) (EC 1.1.1.-) (Quinone reductase CBR4)	Q91VT4	1.144	1.17
535	5. 1	Electron transfer flavoprotein-ubiquinone oxidoreductase, mitochondrial (ETF-QO) (ETF-ubiquinone oxidoreductase) (EC 1.5.5.1) (Electron-transferring-flavoprotein dehydrogenase) (ETF dehydrogenase)	Q921G7	1.092	1.141
536	5. 1	Trifunctional enzyme subunit beta, mitochondrial (TP-beta) [Includes: 3-ketoacyl-CoA thiolase (EC 2.3.1.16) (Acetyl-CoA acyltransferase) (Beta-ketothiolase)]	Q99JY0	1.135	1.175
537	5. 1	Electron transfer flavoprotein subunit alpha, mitochondrial (Alpha-ETF)	Q99LC5	1.144	1.242
538	5. 1	2,4-dienoyl-CoA reductase, mitochondrial (EC 1.3.1.34) (2,4-dienoyl-CoA reductase [NADPH]) (4-enoyl-CoA reductase [NADPH])	Q9CQ62	1.117	1.26
539	5. 1	Succinyl-CoA:3-ketoacid coenzyme A transferase 1, mitochondrial (EC 2.8.3.5) (3-oxoacid CoA-transferase 1) (Somatic-type succinyl-CoA:3-oxoacid CoA-transferase) (SCOT-s)	Q9D0K2	1.111	1.23
540	5. 1	Short/branched chain specific acyl-CoA dehydrogenase, mitochondrial (SBCAD) (EC 1.3.8.5) (2-methyl branched chain acyl-CoA dehydrogenase) (2-MEBCAD) (2-methylbutyryl-coenzyme A dehydrogenase) (2-methylbutyryl-CoA dehydrogenase)	Q9DBL1	1.137	1.067
541	5. 1	Electron transfer flavoprotein subunit beta (Beta-ETF)	Q9DCW4	1.039	1.187
542	5. 2	Glutamine synthetase (GS) (EC 6.3.1.2) (Glutamate decarboxylase) (EC 4.1.1.15) (Glutamate--ammonia ligase)	P15105	0.988	1.025
543	5. 2	Ornithine aminotransferase, mitochondrial (EC 2.6.1.13) (Ornithine--oxo-acid aminotransferase)	P29758	1.147	1.004
544	5. 2	Aldehyde dehydrogenase, mitochondrial (EC 1.2.1.3) (AHD-M1) (ALDH class 2) (ALDH-E2) (ALDHI)	P47738	1.123	1.265
545	5. 2	Glutamate decarboxylase 2 (EC 4.1.1.15) (65 kDa glutamic acid decarboxylase) (GAD-65) (Glutamate decarboxylase 65 kDa isoform)	P48320	0.977	0.911
546	5. 2	4-aminobutyrate aminotransferase, mitochondrial (EC 2.6.1.19) ((S)-3-amino-2-methylpropionate transaminase) (EC 2.6.1.22) (GABA aminotransferase) (GABA-AT) (Gamma-amino-N-butyrate transaminase) (GABA transaminase) (GABA-T) (L-AIBAT)	P61922	1.169	1.205
547	5. 2	Amine oxidase [flavin-containing] A (EC 1.4.3.4) (Monoamine oxidase type A) (MAO-A)	Q64133	1.045	1.086
548	5. 2	Amine oxidase [flavin-containing] B (EC 1.4.3.4) (Monoamine oxidase type B) (MAO-B)	Q8BW75	1.028	1.148
549	5. 2	Delta-1-pyrroline-5-carboxylate dehydrogenase, mitochondrial (P5C dehydrogenase) (EC 1.2.1.88) (Aldehyde dehydrogenase family 4 member A1) (L-glutamate gamma-semialdehyde dehydrogenase)	Q8CHT0	1.146	1.096
550	5. 2	NAD(P)H-hydrate epimerase (EC 5.1.99.6) (Apolipoprotein A-I-binding protein) (AI-BP) (NAD(P)HX epimerase)	Q8K4Z3	1.073	1.048
551	5. 2	ATP-dependent (S)-NAD(P)H-hydrate dehydratase (EC 4.2.1.93) (ATP-dependent NAD(P)HX dehydratase) (Carbohydrate kinase domain-containing protein)	Q9CZ42	1.069	1.125
552	5. 2	Aldehyde dehydrogenase X, mitochondrial (EC 1.2.1.3) (Aldehyde dehydrogenase family 1 member B1)	Q9CZS1	1.062	1.166
553	5. 2	Alpha-aminoadipic semialdehyde dehydrogenase (Alpha-AASA dehydrogenase) (EC 1.2.1.31) (Aldehyde dehydrogenase family 7 member A1) (EC 1.2.1.3) (Antiquitin-1) (Betaine aldehyde dehydrogenase) (EC 1.2.1.8) (Delta1-piperideine-6-carboxylate dehydrogenase) (P6c dehydrogenase)	Q9DBF1	1.112	1.149
554	5. 2	Methylmalonate-semialdehyde dehydrogenase [acylating], mitochondrial (MMSDH) (Malonate-semialdehyde dehydrogenase [acylating]) (EC 1.2.1.18) (EC 1.2.1.27) (Aldehyde dehydrogenase family 6 member A1)	Q9EQ20	1.055	1.219
555	5. 2	4-trimethylaminobutyraldehyde dehydrogenase (TMABADH) (EC 1.2.1.47) (Aldehyde dehydrogenase family 9 member A1) (EC 1.2.1.3)	Q9JLJ2	1.047	1.096
556	5. 3	Methylcrotonoyl-CoA carboxylase beta chain, mitochondrial (MCCase subunit beta) (EC 6.4.1.4) (3-methylcrotonyl-CoA carboxylase 2) (3-methylcrotonyl-CoA carboxylase non-biotin-containing subunit) (3-methylcrotonyl-CoA:carbon dioxide ligase subunit beta)	Q3ULD5	1.034	1.218
557	5. 3	Enoyl-CoA hydratase, mitochondrial (EC 4.2.1.17) (Enoyl-CoA hydratase 1) (Short-chain enoyl-CoA hydratase) (SCEH)	Q8BH95	1.08	1.136
558	5. 3	Citrate lyase subunit beta-like protein, mitochondrial (Citrate lyase beta-like) (EC 4.1.-.-)	Q8R4N0	1.033	1.1
559	5. 3	Propionyl-CoA carboxylase alpha chain, mitochondrial (PCCase subunit alpha) (EC 6.4.1.3) (Propanoyl-CoA:carbon dioxide ligase subunit alpha)	Q91ZA3	1.115	1.155
560	5. 3	Propionyl-CoA carboxylase beta chain, mitochondrial (PCCase subunit beta) (EC 6.4.1.3) (Propanoyl-CoA:carbon dioxide ligase subunit beta)	Q99MN9	1.066	1.185
561	5. 3	Methylcrotonoyl-CoA carboxylase subunit alpha, mitochondrial (MCCase subunit alpha) (EC 6.4.1.4) (3-methylcrotonyl-CoA carboxylase 1) (3-methylcrotonyl-CoA carboxylase biotin-containing subunit) (3-methylcrotonyl-CoA:carbon dioxide ligase subunit alpha)	Q99MR8	0.97	1.102
562	5. 3	Isovaleryl-CoA dehydrogenase, mitochondrial (IVD) (EC 1.3.8.4)	Q9JHI5	1.065	1.423
563	5. 3	Methylglutaconyl-CoA hydratase, mitochondrial (EC 4.2.1.18) (AU-specific RNA-binding enoyl-CoA hydratase) (AU-binding enoyl-CoA hydratase) (muAUH)	Q9JLZ3	1.001	1.106
564	5. 4	C-terminal-binding protein 1 (CtBP1) (EC 1.1.1.-)	O88712	1.024	0.979
565	5. 4	Aldose reductase (AR) (EC 1.1.1.21) (Aldehyde reductase)	P45376	1.02	0.963
566	5. 4	Glyoxylate reductase/hydroxypyruvate reductase (EC 1.1.1.79) (EC 1.1.1.81)	Q91Z53	0.982	0.997
567	5. 4	Phosphoserine aminotransferase (PSAT) (EC 2.6.1.52) (Endometrial progesterone-induced protein) (EPIP) (Phosphohydroxythreonine aminotransferase)	Q99K85	1.002	0.98
568	5. 4	Histidine triad nucleotide-binding protein 2, mitochondrial (HINT-2) (EC 3.-.-.-) (HINT-3)	Q9D0S9	1.045	1.141
569	5. 5	Long-chain-fatty-acid--CoA ligase 1 (EC 6.2.1.3) (Long-chain acyl-CoA synthetase 1) (LACS 1)	P41216	1.092	1.04
570	5. 5	Very long-chain specific acyl-CoA dehydrogenase, mitochondrial (EC 1.3.8.9) (MVLCAD) (VLCAD)	P50544	1.064	1.227
571	5. 5	Long-chain specific acyl-CoA dehydrogenase, mitochondrial (LCAD) (EC 1.3.8.8)	P51174	1.106	1.231
572	5. 5	Carnitine O-palmitoyltransferase 1, brain isoform (CPT1-B) (EC 2.3.1.21) (CPT IC) (Carnitine O-palmitoyltransferase I, brain isoform) (CPTI-B) (Carnitine palmitoyltransferase 1C)	Q8BGD5	1.006	1.042
573	5. 5	Long-chain-fatty-acid--CoA ligase 6 (EC 6.2.1.3) (Long-chain acyl-CoA synthetase 6) (LACS 6)	Q91WC3	1.022	1.085
574	5. 6	Metaxin-2 (Mitochondrial outer membrane import complex protein 2)	O88441	1.006	1.008
575	5. 6	Metaxin-1 (Mitochondrial outer membrane import complex protein 1)	P47802	1.123	1.149
576	6. 1	Ferrochelatase, mitochondrial (EC 4.99.1.1) (Heme synthase) (Protoheme ferro-lyase)	P22315	1.061	1.085
577	6. 1	Thiosulfate sulfurtransferase (EC 2.8.1.1) (Rhodanese)	P52196	1.046	1.224
578	6. 1	60 kDa heat shock protein, mitochondrial (60 kDa chaperonin) (Chaperonin 60) (CPN60) (HSP-65) (Heat shock protein 60) (HSP-60) (Hsp60) (Mitochondrial matrix protein P1)	P63038	1.117	1.18
579	6. 1	ATP-binding cassette sub-family B member 7, mitochondrial (ATP-binding cassette transporter 7) (ABC transporter 7 protein)	Q61102	1.043	0.992
580	6. 1	Leucine-rich PPR motif-containing protein, mitochondrial (130 kDa leucine-rich protein) (LRP 130) (mLRP130)	Q6PB66	1.112	1.158
581	6. 1	Isoleucine--tRNA ligase, mitochondrial (EC 6.1.1.5) (Isoleucyl-tRNA synthetase) (IleRS)	Q8BIJ6	1.086	1.201
582	6. 1	Lon protease homolog, mitochondrial (EC 3.4.21.-) (Lon protease-like protein) (LONP) (Mitochondrial ATP-dependent protease Lon) (Serine protease 15)	Q8CGK3	1.131	1.191
583	6. 1	ATPase family AAA domain-containing protein 3 (AAA-ATPase TOB3)	Q925I1	1.027	1.138
584	6. 1	Hsc70-interacting protein (Hip) (Protein FAM10A1) (Protein ST13 homolog)	Q99L47	0.895	0.827
585	6. 1	Heat shock protein 75 kDa, mitochondrial (HSP 75) (TNFR-associated protein 1) (Tumor necrosis factor type 1 receptor-associated protein) (TRAP-1)	Q9CQN1	1.051	1.152
586	6. 1	Mitochondrial import receptor subunit TOM70 (Mitochondrial precursor proteins import receptor) (Translocase of outer membrane 70 kDa subunit)	Q9CZW5	1.07	1.074
587	6. 2	Heat shock protein HSP 90-alpha (Heat shock 86 kDa) (HSP 86) (HSP86) (Tumor-specific transplantation 86 kDa antigen) (TSTA)	P07901	1.047	0.949
588	6. 2	Heat shock protein HSP 90-beta (Heat shock 84 kDa) (HSP 84) (HSP84) (Tumor-specific transplantation 84 kDa antigen) (TSTA)	P11499	1.072	0.959
589	6. 2	Heat shock cognate 71 kDa protein (Heat shock 70 kDa protein 8)	P63017	0.999	1.005	*
590	6. 2	DnaJ homolog subfamily A member 1 (DnaJ protein homolog 2) (Heat shock 40 kDa protein 4) (Heat shock protein J2) (HSJ-2)	P63037	1.067	1.039	*
591	6. 2	Creatine kinase B-type (EC 2.7.3.2) (B-CK) (Creatine kinase B chain)	Q04447	1.005	0.984
592	6. 2	Stress-induced-phosphoprotein 1 (STI1) (mSTI1) (Hsc70/Hsp90-organizing protein) (Hop)	Q60864	0.918	0.826
593	6. 2	Heat shock protein 105 kDa (42 degrees C-HSP) (Heat shock 110 kDa protein) (Heat shock-related 100 kDa protein E7I) (HSP-E7I)	Q61699	0.983	0.929
594	6. 2	Activator of 90 kDa heat shock protein ATPase homolog 1 (AHA1)	Q8BK64	0.989	1.012
595	6. 2	Peptidyl-prolyl cis-trans isomerase D (PPIase D) (EC 5.2.1.8) (40 kDa peptidyl-prolyl cis-trans isomerase) (Cyclophilin-40) (CYP-40) (Rotamase D)	Q9CR16	1.046	0.912
596	6. 3	Receptor-type tyrosine-protein phosphatase zeta (R-PTP-zeta) (EC 3.1.3.48)	B9EKR1	0.999	1.076
597	6. 3	Contactin-associated protein 1 (Caspr) (Caspr1) (MHDNIV) (NCP1) (Neurexin IV) (Neurexin-4) (Paranodin)	O54991	1.006	1.048			*
598	6. 3	Heat shock 70 kDa protein 4L (Heat shock 70-related protein APG-1) (Osmotic stress protein 94)	P48722	1.027	1.025
599	6. 3	Neuroplastin (Stromal cell-derived receptor 1) (SDR-1)	P97300	0.877	1.075		*
600	6. 3	Contactin-2 (Axonal glycoprotein TAG-1) (Axonin-1) (Transient axonal glycoprotein 1) (TAX-1)	Q61330	0.923	1
601	6. 3	Reticulon-1 (Neuroendocrine-specific protein)	Q8K0T0	0.916	0.884
602	6. 3	Reticulon-4 (Neurite outgrowth inhibitor) (Nogo protein)	Q99P72	0.974	0.95
603	6. 3	Leucine-rich repeat and immunoglobulin-like domain-containing nogo receptor-interacting protein 1 (Leucine-rich repeat neuronal protein 1) (Leucine-rich repeat neuronal protein 6A)	Q9D1T0	0.874	1.037
604	6. 3	Reticulon-3	Q9ES97	1.002	0.956
605	6. 4	Mitochondrial import inner membrane translocase subunit TIM44	O35857	1.057	1.069
606	6. 4	Heat shock-related 70 kDa protein 2 (Heat shock protein 70.2)	P17156	0.95	1.012
607	6. 4	Stress-70 protein, mitochondrial (75 kDa glucose-regulated protein) (GRP-75) (Heat shock 70 kDa protein 9) (Mortalin) (Peptide-binding protein 74) (PBP74) (p66 MOT)	P38647	1.069	1.207
608	6. 4	AFG3-like protein 2 (EC 3.4.24.-)	Q8JZQ2	1.077	1.191
609	6. 4	Mitochondrial import inner membrane translocase subunit TIM50	Q9D880	1.046	1.091
610	6. 4	DnaJ homolog subfamily A member 2 (mDj3)	Q9QYJ0	1.049	0.954	*
611	7	Septin-7 (CDC10 protein homolog)	O55131	0.999	0.952
612	7	Septin-4 (Brain protein H5) (Peanut-like protein 2)	P28661	1.001	0.916
613	7	Septin-2 (Neural precursor cell expressed developmentally down-regulated protein 5) (NEDD-5)	P42208	0.971	0.95
614	7	Excitatory amino acid transporter 1 (Glial high affinity glutamate transporter) (High-affinity neuronal glutamate transporter) (Sodium-dependent glutamate/aspartate transporter 1) (GLAST-1) (Solute carrier family 1 member 3)	P56564	0.902	1.075
615	7	Septin-5 (Cell division control-related protein 1) (CDCrel-1) (Peanut-like protein 1)	Q9Z2Q6	1.1	0.912
