# Supplementary material for: APP Is a Context-Sensitive Regulator of the Hippocampal Presynaptic Active Zone
Source: PLOS journal article supplement (doi:10.1371/journal.pcbi.1004832), 2016-04-19
Supplement: S6 (10.1371/journal.pcbi.1004832.s006) [file journal.pcbi.1004832.s006.cys]

Archive with 135 entries (135 files):
- CytoscapeSession-2016_01_22-10_07/3.0.0.version
- CytoscapeSession-2016_01_22-10_07/networks/12178-Core+Network+Localization.xgmml
- CytoscapeSession-2016_01_22-10_07/networks/8147-Core+Network+Communities.xgmml
- CytoscapeSession-2016_01_22-10_07/networks/36-Basic+Network.xgmml
- CytoscapeSession-2016_01_22-10_07/networks/4116-Core+Network+Subcommunities.xgmml
- CytoscapeSession-2016_01_22-10_07/views/62-28547-Core+Network+PAZ.xgmml
- CytoscapeSession-2016_01_22-10_07/views/12194-20533-Localization.xgmml
- CytoscapeSession-2016_01_22-10_07/views/8163-24540-Communities.xgmml
- CytoscapeSession-2016_01_22-10_07/views/4132-16293-Subcommunities.xgmml
- CytoscapeSession-2016_01_22-10_07/tables/12178-Core+Network+Localization/SHARED_ATTRS-org.cytoscape.model.CyEdge-12178+shared+edge.cytable
- CytoscapeSession-2016_01_22-10_07/tables/12194-Localization/LOCAL_ATTRS-org.cytoscape.model.CyNetwork-Localization+default+network.cytable
- CytoscapeSession-2016_01_22-10_07/tables/36-Basic+Network/LOCAL_ATTRS-org.cytoscape.model.CyEdge-36+default+edge.cytable
- CytoscapeSession-2016_01_22-10_07/tables/4116-Core+Network+Subcommunities/HIDDEN-org.cytoscape.model.CyEdge-4116+hidden+edge.cytable
- CytoscapeSession-2016_01_22-10_07/tables/12194-Localization/HIDDEN-org.cytoscape.model.CyNetwork-12194+hidden+network.cytable
- CytoscapeSession-2016_01_22-10_07/tables/8163-Communities/HIDDEN-org.cytoscape.model.CyNode-8163+hidden+node.cytable
- CytoscapeSession-2016_01_22-10_07/tables/36-Basic+Network/HIDDEN-org.cytoscape.model.CyNetwork-36+hidden+network.cytable
- CytoscapeSession-2016_01_22-10_07/tables/8147-Core+Network+Communities/SHARED_ATTRS-org.cytoscape.model.CyNetwork-8147+shared+network.cytable
- CytoscapeSession-2016_01_22-10_07/tables/4077-Cytoskeleton+Subnetwork/LOCAL_ATTRS-org.cytoscape.model.CyNode-Cytoskeleton+Subnetwork+default+node.cytable
- CytoscapeSession-2016_01_22-10_07/tables/12178-Core+Network+Localization/LOCAL_ATTRS-org.cytoscape.model.CyNetwork-12178+default+network.cytable
- CytoscapeSession-2016_01_22-10_07/tables/52-52/HIDDEN-org.cytoscape.model.CyEdge-52+hidden+edge.cytable
- CytoscapeSession-2016_01_22-10_07/tables/36-Basic+Network/HIDDEN-org.cytoscape.model.CyEdge-36+hidden+edge.cytable
- CytoscapeSession-2016_01_22-10_07/tables/4105-Calcium+Homeostasis+Subnetwork/LOCAL_ATTRS-org.cytoscape.model.CyEdge-Calcium+Homeostasis+Subnetwork+default+edge.cytable
- CytoscapeSession-2016_01_22-10_07/tables/12178-Core+Network+Localization/SHARED_ATTRS-org.cytoscape.model.CyNode-12178+shared+node.cytable
- CytoscapeSession-2016_01_22-10_07/tables/12194-Localization/LOCAL_ATTRS-org.cytoscape.model.CyNode-Localization+default+node.cytable
- CytoscapeSession-2016_01_22-10_07/tables/8163-Communities/LOCAL_ATTRS-org.cytoscape.model.CyEdge-Communities+default+edge.cytable
- CytoscapeSession-2016_01_22-10_07/tables/36-Basic+Network/SHARED_ATTRS-org.cytoscape.model.CyEdge-36+shared+edge.cytable
- CytoscapeSession-2016_01_22-10_07/tables/4105-Calcium+Homeostasis+Subnetwork/HIDDEN-org.cytoscape.model.CyNetwork-4105+hidden+network.cytable
- CytoscapeSession-2016_01_22-10_07/tables/52-52/LOCAL_ATTRS-org.cytoscape.model.CyNetwork-52+default+network.cytable
- CytoscapeSession-2016_01_22-10_07/tables/36-Basic+Network/SHARED_ATTRS-org.cytoscape.model.CyNode-36+shared+node.cytable
- CytoscapeSession-2016_01_22-10_07/tables/8163-Communities/LOCAL_ATTRS-org.cytoscape.model.CyNode-Communities+default+node.cytable
- CytoscapeSession-2016_01_22-10_07/tables/62-Core+Network+PAZ/LOCAL_ATTRS-org.cytoscape.model.CyNetwork-Core+Network+PAZ+default+network.cytable
- CytoscapeSession-2016_01_22-10_07/tables/8147-Core+Network+Communities/LOCAL_ATTRS-org.cytoscape.model.CyNode-8147+default+node.cytable
- CytoscapeSession-2016_01_22-10_07/tables/4077-Cytoskeleton+Subnetwork/LOCAL_ATTRS-org.cytoscape.model.CyEdge-Cytoskeleton+Subnetwork+default+edge.cytable
- CytoscapeSession-2016_01_22-10_07/tables/4095-Synaptic+Vesicle+Cycle+Subnetwork/LOCAL_ATTRS-org.cytoscape.model.CyNode-Synaptic+Vesicle+Cycle+Subnetwork+default+node.cytable
- CytoscapeSession-2016_01_22-10_07/tables/12178-Core+Network+Localization/HIDDEN-org.cytoscape.model.CyEdge-12178+hidden+edge.cytable
- CytoscapeSession-2016_01_22-10_07/tables/62-Core+Network+PAZ/HIDDEN-org.cytoscape.model.CyNetwork-62+hidden+network.cytable
- CytoscapeSession-2016_01_22-10_07/tables/8147-Core+Network+Communities/LOCAL_ATTRS-org.cytoscape.model.CyEdge-8147+default+edge.cytable
- CytoscapeSession-2016_01_22-10_07/tables/4116-Core+Network+Subcommunities/SHARED_ATTRS-org.cytoscape.model.CyNode-4116+shared+node.cytable
- CytoscapeSession-2016_01_22-10_07/tables/8147-Core+Network+Communities/HIDDEN-org.cytoscape.model.CyEdge-8147+hidden+edge.cytable
- CytoscapeSession-2016_01_22-10_07/tables/52-52/HIDDEN-org.cytoscape.model.CyNode-52+hidden+node.cytable
- CytoscapeSession-2016_01_22-10_07/tables/4116-Core+Network+Subcommunities/LOCAL_ATTRS-org.cytoscape.model.CyNetwork-4116+default+network.cytable
- CytoscapeSession-2016_01_22-10_07/tables/4116-Core+Network+Subcommunities/SHARED_ATTRS-org.cytoscape.model.CyEdge-4116+shared+edge.cytable
- CytoscapeSession-2016_01_22-10_07/tables/4077-Cytoskeleton+Subnetwork/HIDDEN-org.cytoscape.model.CyNetwork-4077+hidden+network.cytable
- CytoscapeSession-2016_01_22-10_07/tables/4105-Calcium+Homeostasis+Subnetwork/LOCAL_ATTRS-org.cytoscape.model.CyNetwork-Calcium+Homeostasis+Subnetwork+default+network.cytable
- CytoscapeSession-2016_01_22-10_07/tables/4105-Calcium+Homeostasis+Subnetwork/LOCAL_ATTRS-org.cytoscape.model.CyNode-Calcium+Homeostasis+Subnetwork+default+node.cytable
- CytoscapeSession-2016_01_22-10_07/tables/12178-Core+Network+Localization/HIDDEN-org.cytoscape.model.CyNetwork-12178+hidden+network.cytable
- CytoscapeSession-2016_01_22-10_07/tables/4105-Calcium+Homeostasis+Subnetwork/HIDDEN-org.cytoscape.model.CyNode-4105+hidden+node.cytable
- CytoscapeSession-2016_01_22-10_07/tables/4095-Synaptic+Vesicle+Cycle+Subnetwork/LOCAL_ATTRS-org.cytoscape.model.CyNetwork-Synaptic+Vesicle+Cycle+Subnetwork+default+network.cytable
- CytoscapeSession-2016_01_22-10_07/tables/52-52/LOCAL_ATTRS-org.cytoscape.model.CyEdge-52+default+edge.cytable
- CytoscapeSession-2016_01_22-10_07/tables/4116-Core+Network+Subcommunities/LOCAL_ATTRS-org.cytoscape.model.CyNode-4116+default+node.cytable
- CytoscapeSession-2016_01_22-10_07/tables/52-52/LOCAL_ATTRS-org.cytoscape.model.CyNode-52+default+node.cytable
- CytoscapeSession-2016_01_22-10_07/tables/8147-Core+Network+Communities/LOCAL_ATTRS-org.cytoscape.model.CyNetwork-8147+default+network.cytable
- CytoscapeSession-2016_01_22-10_07/tables/4116-Core+Network+Subcommunities/LOCAL_ATTRS-org.cytoscape.model.CyEdge-4116+default+edge.cytable
- CytoscapeSession-2016_01_22-10_07/tables/62-Core+Network+PAZ/LOCAL_ATTRS-org.cytoscape.model.CyEdge-Core+Network+PAZ+default+edge.cytable
- CytoscapeSession-2016_01_22-10_07/tables/8147-Core+Network+Communities/SHARED_ATTRS-org.cytoscape.model.CyNode-8147+shared+node.cytable
- CytoscapeSession-2016_01_22-10_07/tables/4077-Cytoskeleton+Subnetwork/HIDDEN-org.cytoscape.model.CyEdge-4077+hidden+edge.cytable
- CytoscapeSession-2016_01_22-10_07/tables/4095-Synaptic+Vesicle+Cycle+Subnetwork/HIDDEN-org.cytoscape.model.CyEdge-4095+hidden+edge.cytable
- CytoscapeSession-2016_01_22-10_07/tables/62-Core+Network+PAZ/HIDDEN-org.cytoscape.model.CyEdge-62+hidden+edge.cytable
- CytoscapeSession-2016_01_22-10_07/tables/36-Basic+Network/LOCAL_ATTRS-org.cytoscape.model.CyNetwork-36+default+network.cytable
- CytoscapeSession-2016_01_22-10_07/tables/4095-Synaptic+Vesicle+Cycle+Subnetwork/HIDDEN-org.cytoscape.model.CyNode-4095+hidden+node.cytable
- CytoscapeSession-2016_01_22-10_07/tables/4095-Synaptic+Vesicle+Cycle+Subnetwork/LOCAL_ATTRS-org.cytoscape.model.CyEdge-Synaptic+Vesicle+Cycle+Subnetwork+default+edge.cytable
- CytoscapeSession-2016_01_22-10_07/tables/12194-Localization/HIDDEN-org.cytoscape.model.CyEdge-12194+hidden+edge.cytable
- CytoscapeSession-2016_01_22-10_07/tables/4132-Subcommunities/LOCAL_ATTRS-org.cytoscape.model.CyEdge-Subcommunities+default+edge.cytable
- CytoscapeSession-2016_01_22-10_07/tables/4132-Subcommunities/LOCAL_ATTRS-org.cytoscape.model.CyNetwork-Subcommunities+default+network.cytable
- CytoscapeSession-2016_01_22-10_07/tables/4132-Subcommunities/LOCAL_ATTRS-org.cytoscape.model.CyNode-Subcommunities+default+node.cytable
- CytoscapeSession-2016_01_22-10_07/tables/36-Basic+Network/LOCAL_ATTRS-org.cytoscape.model.CyNode-36+default+node.cytable
- CytoscapeSession-2016_01_22-10_07/tables/12178-Core+Network+Localization/SHARED_ATTRS-org.cytoscape.model.CyNetwork-12178+shared+network.cytable
- CytoscapeSession-2016_01_22-10_07/tables/12194-Localization/HIDDEN-org.cytoscape.model.CyNode-12194+hidden+node.cytable
- CytoscapeSession-2016_01_22-10_07/tables/12194-Localization/LOCAL_ATTRS-org.cytoscape.model.CyEdge-Localization+default+edge.cytable
- CytoscapeSession-2016_01_22-10_07/tables/8163-Communities/LOCAL_ATTRS-org.cytoscape.model.CyNetwork-Communities+default+network.cytable
- CytoscapeSession-2016_01_22-10_07/tables/8163-Communities/HIDDEN-org.cytoscape.model.CyEdge-8163+hidden+edge.cytable
- CytoscapeSession-2016_01_22-10_07/tables/4132-Subcommunities/HIDDEN-org.cytoscape.model.CyEdge-4132+hidden+edge.cytable
- CytoscapeSession-2016_01_22-10_07/tables/4116-Core+Network+Subcommunities/HIDDEN-org.cytoscape.model.CyNode-4116+hidden+node.cytable
- CytoscapeSession-2016_01_22-10_07/tables/4077-Cytoskeleton+Subnetwork/LOCAL_ATTRS-org.cytoscape.model.CyNetwork-Cytoskeleton+Subnetwork+default+network.cytable
- CytoscapeSession-2016_01_22-10_07/tables/4116-Core+Network+Subcommunities/SHARED_ATTRS-org.cytoscape.model.CyNetwork-4116+shared+network.cytable
- CytoscapeSession-2016_01_22-10_07/tables/52-52/HIDDEN-org.cytoscape.model.CyNetwork-52+hidden+network.cytable
- CytoscapeSession-2016_01_22-10_07/tables/12178-Core+Network+Localization/HIDDEN-org.cytoscape.model.CyNode-12178+hidden+node.cytable
- CytoscapeSession-2016_01_22-10_07/tables/4116-Core+Network+Subcommunities/HIDDEN-org.cytoscape.model.CyNetwork-4116+hidden+network.cytable
- CytoscapeSession-2016_01_22-10_07/tables/4132-Subcommunities/HIDDEN-org.cytoscape.model.CyNode-4132+hidden+node.cytable
- CytoscapeSession-2016_01_22-10_07/tables/36-Basic+Network/HIDDEN-org.cytoscape.model.CyNode-36+hidden+node.cytable
- CytoscapeSession-2016_01_22-10_07/tables/4105-Calcium+Homeostasis+Subnetwork/HIDDEN-org.cytoscape.model.CyEdge-4105+hidden+edge.cytable
- CytoscapeSession-2016_01_22-10_07/tables/62-Core+Network+PAZ/LOCAL_ATTRS-org.cytoscape.model.CyNode-Core+Network+PAZ+default+node.cytable
- CytoscapeSession-2016_01_22-10_07/tables/12178-Core+Network+Localization/LOCAL_ATTRS-org.cytoscape.model.CyEdge-12178+default+edge.cytable
- CytoscapeSession-2016_01_22-10_07/tables/8147-Core+Network+Communities/HIDDEN-org.cytoscape.model.CyNode-8147+hidden+node.cytable
- CytoscapeSession-2016_01_22-10_07/tables/36-Basic+Network/SHARED_ATTRS-org.cytoscape.model.CyNetwork-36+shared+network.cytable
- CytoscapeSession-2016_01_22-10_07/tables/8147-Core+Network+Communities/HIDDEN-org.cytoscape.model.CyNetwork-8147+hidden+network.cytable
- CytoscapeSession-2016_01_22-10_07/tables/8147-Core+Network+Communities/SHARED_ATTRS-org.cytoscape.model.CyEdge-8147+shared+edge.cytable
- CytoscapeSession-2016_01_22-10_07/tables/62-Core+Network+PAZ/HIDDEN-org.cytoscape.model.CyNode-62+hidden+node.cytable
- CytoscapeSession-2016_01_22-10_07/tables/4132-Subcommunities/HIDDEN-org.cytoscape.model.CyNetwork-4132+hidden+network.cytable
- CytoscapeSession-2016_01_22-10_07/tables/4077-Cytoskeleton+Subnetwork/HIDDEN-org.cytoscape.model.CyNode-4077+hidden+node.cytable
- CytoscapeSession-2016_01_22-10_07/tables/4095-Synaptic+Vesicle+Cycle+Subnetwork/HIDDEN-org.cytoscape.model.CyNetwork-4095+hidden+network.cytable
- CytoscapeSession-2016_01_22-10_07/tables/12178-Core+Network+Localization/LOCAL_ATTRS-org.cytoscape.model.CyNode-12178+default+node.cytable
- CytoscapeSession-2016_01_22-10_07/tables/8163-Communities/HIDDEN-org.cytoscape.model.CyNetwork-8163+hidden+network.cytable
- CytoscapeSession-2016_01_22-10_07/tables/cytables.xml
- CytoscapeSession-2016_01_22-10_07/session_vizmap.xml
- CytoscapeSession-2016_01_22-10_07/properties/session_bookmarks.xml
- CytoscapeSession-2016_01_22-10_07/apps/org.cytoscape.ding.customgraphicsmgr/1.png
- CytoscapeSession-2016_01_22-10_07/apps/org.cytoscape.ding.customgraphicsmgr/10.png
- CytoscapeSession-2016_01_22-10_07/apps/org.cytoscape.ding.customgraphicsmgr/11.png
- CytoscapeSession-2016_01_22-10_07/apps/org.cytoscape.ding.customgraphicsmgr/12.png
- CytoscapeSession-2016_01_22-10_07/apps/org.cytoscape.ding.customgraphicsmgr/13.png
- CytoscapeSession-2016_01_22-10_07/apps/org.cytoscape.ding.customgraphicsmgr/14.png
- CytoscapeSession-2016_01_22-10_07/apps/org.cytoscape.ding.customgraphicsmgr/15.png
- CytoscapeSession-2016_01_22-10_07/apps/org.cytoscape.ding.customgraphicsmgr/16.png
- CytoscapeSession-2016_01_22-10_07/apps/org.cytoscape.ding.customgraphicsmgr/17.png
- CytoscapeSession-2016_01_22-10_07/apps/org.cytoscape.ding.customgraphicsmgr/18.png
- CytoscapeSession-2016_01_22-10_07/apps/org.cytoscape.ding.customgraphicsmgr/19.png
- CytoscapeSession-2016_01_22-10_07/apps/org.cytoscape.ding.customgraphicsmgr/2.png
- CytoscapeSession-2016_01_22-10_07/apps/org.cytoscape.ding.customgraphicsmgr/20.png
- CytoscapeSession-2016_01_22-10_07/apps/org.cytoscape.ding.customgraphicsmgr/21.png
- CytoscapeSession-2016_01_22-10_07/apps/org.cytoscape.ding.customgraphicsmgr/22.png
- CytoscapeSession-2016_01_22-10_07/apps/org.cytoscape.ding.customgraphicsmgr/23.png
- CytoscapeSession-2016_01_22-10_07/apps/org.cytoscape.ding.customgraphicsmgr/24.png
- CytoscapeSession-2016_01_22-10_07/apps/org.cytoscape.ding.customgraphicsmgr/29.png
- CytoscapeSession-2016_01_22-10_07/apps/org.cytoscape.ding.customgraphicsmgr/3.png
- CytoscapeSession-2016_01_22-10_07/apps/org.cytoscape.ding.customgraphicsmgr/30.png
- CytoscapeSession-2016_01_22-10_07/apps/org.cytoscape.ding.customgraphicsmgr/31.png
- CytoscapeSession-2016_01_22-10_07/apps/org.cytoscape.ding.customgraphicsmgr/4.png
- CytoscapeSession-2016_01_22-10_07/apps/org.cytoscape.ding.customgraphicsmgr/42.png
- CytoscapeSession-2016_01_22-10_07/apps/org.cytoscape.ding.customgraphicsmgr/43.png
- CytoscapeSession-2016_01_22-10_07/apps/org.cytoscape.ding.customgraphicsmgr/5.png
- CytoscapeSession-2016_01_22-10_07/apps/org.cytoscape.ding.customgraphicsmgr/6.png
- CytoscapeSession-2016_01_22-10_07/apps/org.cytoscape.ding.customgraphicsmgr/7.png
- CytoscapeSession-2016_01_22-10_07/apps/org.cytoscape.ding.customgraphicsmgr/8.png
- CytoscapeSession-2016_01_22-10_07/apps/org.cytoscape.ding.customgraphicsmgr/9.png
- CytoscapeSession-2016_01_22-10_07/apps/org.cytoscape.ding.customgraphicsmgr/image_metadata.props
- CytoscapeSession-2016_01_22-10_07/apps/org.genemania/app.properties
- CytoscapeSession-2016_01_22-10_07/apps/org.cytoscape.swing-application/session_state.xml
- CytoscapeSession-2016_01_22-10_07/apps/org.cytoscape.swing-application/network_list.xml
- CytoscapeSession-2016_01_22-10_07/apps/org.cytoscape.filter/filters.json
- CytoscapeSession-2016_01_22-10_07/apps/org.cytoscape.filter/filterChains.json
- CytoscapeSession-2016_01_22-10_07/apps/org.cytoscape.browser/NodeTable.props
- CytoscapeSession-2016_01_22-10_07/apps/org.cytoscape.browser/NetworkTable.props
- CytoscapeSession-2016_01_22-10_07/apps/org.cytoscape.browser/EdgeTable.props
- CytoscapeSession-2016_01_22-10_07/apps/org.cytoscape.browser/UnassignedTables.props
