# Supplementary material for: APP Is a Context-Sensitive Regulator of the Hippocampal Presynaptic Active Zone
Source: PLOS journal article supplement (doi:10.1371/journal.pcbi.1004832), 2016-04-19
Supplement: S6 (10.1371/journal.pcbi.1004832.s006) [file journal.pcbi.1004832.s006.cys › CytoscapeSession-2016_01_22-10_07/apps/org.cytoscape.browser/EdgeTable.props]

Synaptic Vesicle Cycle Subnetwork default edge	0	SUID	false
Synaptic Vesicle Cycle Subnetwork default edge	1	selected	false
Synaptic Vesicle Cycle Subnetwork default edge	2	shared name	true
Synaptic Vesicle Cycle Subnetwork default edge	3	shared interaction	true
Synaptic Vesicle Cycle Subnetwork default edge	4	name	true
Synaptic Vesicle Cycle Subnetwork default edge	5	interaction	true
Calcium Homeostasis Subnetwork default edge	0	SUID	false
Calcium Homeostasis Subnetwork default edge	1	selected	false
Calcium Homeostasis Subnetwork default edge	2	shared name	true
Calcium Homeostasis Subnetwork default edge	3	shared interaction	true
Calcium Homeostasis Subnetwork default edge	4	name	true
Calcium Homeostasis Subnetwork default edge	5	interaction	true
Communities default edge	0	SUID	false
Communities default edge	1	selected	false
Communities default edge	2	shared name	true
Communities default edge	3	shared interaction	true
Communities default edge	4	name	true
Communities default edge	5	interaction	true
Core Network PAZ default edge	0	SUID	false
Core Network PAZ default edge	1	selected	false
Core Network PAZ default edge	2	shared name	true
Core Network PAZ default edge	3	shared interaction	true
Core Network PAZ default edge	4	name	true
Core Network PAZ default edge	5	interaction	true
Cytoskeleton Subnetwork default edge	0	SUID	false
Cytoskeleton Subnetwork default edge	1	selected	false
Cytoskeleton Subnetwork default edge	2	shared name	true
Cytoskeleton Subnetwork default edge	3	shared interaction	true
Cytoskeleton Subnetwork default edge	4	name	true
Cytoskeleton Subnetwork default edge	5	interaction	true
Localization default edge	0	SUID	false
Localization default edge	1	selected	false
Localization default edge	2	shared name	true
Localization default edge	3	shared interaction	true
Localization default edge	4	name	true
Localization default edge	5	interaction	true
Localization default edge	6	BEND_MAP_ID	true
Subcommunities default edge	0	SUID	false
Subcommunities default edge	1	selected	false
Subcommunities default edge	2	shared name	true
Subcommunities default edge	3	shared interaction	true
Subcommunities default edge	4	name	true
Subcommunities default edge	5	interaction	true
