# Supplementary material for: APP Is a Context-Sensitive Regulator of the Hippocampal Presynaptic Active Zone
Source: PLOS journal article supplement (doi:10.1371/journal.pcbi.1004832), 2016-04-19
Supplement: S6 (10.1371/journal.pcbi.1004832.s006) [file journal.pcbi.1004832.s006.cys › CytoscapeSession-2016_01_22-10_07/apps/org.cytoscape.browser/NetworkTable.props]

Localization default network	0	SUID	false
Localization default network	1	selected	false
Localization default network	2	shared name	true
Localization default network	3	name	true
Localization default network	4	__Annotations	true
Synaptic Vesicle Cycle Subnetwork default network	0	SUID	false
Synaptic Vesicle Cycle Subnetwork default network	1	selected	false
Synaptic Vesicle Cycle Subnetwork default network	2	shared name	true
Synaptic Vesicle Cycle Subnetwork default network	3	name	true
Synaptic Vesicle Cycle Subnetwork default network	4	__Annotations	true
Communities default network	0	SUID	false
Communities default network	1	selected	false
Communities default network	2	shared name	true
Communities default network	3	name	true
Communities default network	4	__Annotations	true
Cytoskeleton Subnetwork default network	0	SUID	false
Cytoskeleton Subnetwork default network	1	selected	false
Cytoskeleton Subnetwork default network	2	shared name	true
Cytoskeleton Subnetwork default network	3	name	true
Cytoskeleton Subnetwork default network	4	__Annotations	true
Subcommunities default network	0	SUID	false
Subcommunities default network	1	selected	false
Subcommunities default network	2	shared name	true
Subcommunities default network	3	name	true
Subcommunities default network	4	__Annotations	true
Calcium Homeostasis Subnetwork default network	0	SUID	false
Calcium Homeostasis Subnetwork default network	1	selected	false
Calcium Homeostasis Subnetwork default network	2	shared name	true
Calcium Homeostasis Subnetwork default network	3	name	true
Calcium Homeostasis Subnetwork default network	4	__Annotations	true
Core Network PAZ default network	0	SUID	false
Core Network PAZ default network	1	selected	false
Core Network PAZ default network	2	shared name	true
Core Network PAZ default network	3	name	true
Core Network PAZ default network	4	__Annotations	true
