# Supplementary material for: APP Is a Context-Sensitive Regulator of the Hippocampal Presynaptic Active Zone
Source: PLOS journal article supplement (doi:10.1371/journal.pcbi.1004832), 2016-04-19
Supplement: S6 (10.1371/journal.pcbi.1004832.s006) [file journal.pcbi.1004832.s006.cys › CytoscapeSession-2016_01_22-10_07/apps/org.cytoscape.browser/NodeTable.props]

Cytoskeleton Subnetwork default node	0	SUID	false
Cytoskeleton Subnetwork default node	1	selected	false
Cytoskeleton Subnetwork default node	2	shared name	true
Cytoskeleton Subnetwork default node	3	name	true
Cytoskeleton Subnetwork default node	4	1_Localization	true
Cytoskeleton Subnetwork default node	5	APP-KO/wt	true
Cytoskeleton Subnetwork default node	6	Community	true
Cytoskeleton Subnetwork default node	7	Gene names	true
Cytoskeleton Subnetwork default node	8	Gene names (primary )	true
Cytoskeleton Subnetwork default node	9	NexCre/wt	true
Cytoskeleton Subnetwork default node	10	Organism	true
Cytoskeleton Subnetwork default node	11	Organism ID	true
Cytoskeleton Subnetwork default node	12	Protein names	true
Cytoskeleton Subnetwork default node	13	Status	true
Cytoskeleton Subnetwork default node	14	Subcommunities	true
Calcium Homeostasis Subnetwork default node	0	SUID	false
Calcium Homeostasis Subnetwork default node	1	selected	false
Calcium Homeostasis Subnetwork default node	2	shared name	true
Calcium Homeostasis Subnetwork default node	3	name	true
Calcium Homeostasis Subnetwork default node	4	1_Localization	true
Calcium Homeostasis Subnetwork default node	5	APP-KO/wt	true
Calcium Homeostasis Subnetwork default node	6	Community	true
Calcium Homeostasis Subnetwork default node	7	Gene names	true
Calcium Homeostasis Subnetwork default node	8	Gene names (primary )	true
Calcium Homeostasis Subnetwork default node	9	NexCre/wt	true
Calcium Homeostasis Subnetwork default node	10	Organism	true
Calcium Homeostasis Subnetwork default node	11	Organism ID	true
Calcium Homeostasis Subnetwork default node	12	Protein names	true
Calcium Homeostasis Subnetwork default node	13	Status	true
Calcium Homeostasis Subnetwork default node	14	Subcommunities	true
Communities default node	0	SUID	false
Communities default node	1	selected	false
Communities default node	2	shared name	true
Communities default node	3	name	true
Communities default node	4	1_Localization	true
Communities default node	5	APP-KO/wt	true
Communities default node	6	Community	true
Communities default node	7	Gene names	true
Communities default node	8	Gene names (primary )	true
Communities default node	9	NexCre/wt	true
Communities default node	10	Organism	true
Communities default node	11	Organism ID	true
Communities default node	12	Protein names	true
Communities default node	13	Status	true
Communities default node	14	Subcommunities	true
Localization default node	0	SUID	false
Localization default node	1	selected	false
Localization default node	2	shared name	true
Localization default node	3	name	true
Localization default node	4	1_Localization	true
Localization default node	5	APP-KO/wt	true
Localization default node	6	Community	true
Localization default node	7	Gene names	true
Localization default node	8	Gene names (primary )	true
Localization default node	9	NexCre/wt	true
Localization default node	10	Organism	true
Localization default node	11	Organism ID	true
Localization default node	12	Protein names	true
Localization default node	13	Status	true
Localization default node	14	Subcommunities	true
Core Network PAZ default node	0	SUID	false
Core Network PAZ default node	1	selected	false
Core Network PAZ default node	2	shared name	true
Core Network PAZ default node	3	name	true
Core Network PAZ default node	4	1_Localization	true
Core Network PAZ default node	5	APP-KO/wt	true
Core Network PAZ default node	6	Community	true
Core Network PAZ default node	7	Gene names	true
Core Network PAZ default node	8	Gene names (primary )	true
Core Network PAZ default node	9	NexCre/wt	true
Core Network PAZ default node	10	Organism	true
Core Network PAZ default node	11	Organism ID	true
Core Network PAZ default node	12	Protein names	true
Core Network PAZ default node	13	Status	true
Core Network PAZ default node	14	Subcommunities	true
Synaptic Vesicle Cycle Subnetwork default node	0	SUID	false
Synaptic Vesicle Cycle Subnetwork default node	1	selected	false
Synaptic Vesicle Cycle Subnetwork default node	2	shared name	true
Synaptic Vesicle Cycle Subnetwork default node	3	name	true
Synaptic Vesicle Cycle Subnetwork default node	4	1_Localization	true
Synaptic Vesicle Cycle Subnetwork default node	5	APP-KO/wt	true
Synaptic Vesicle Cycle Subnetwork default node	6	Community	true
Synaptic Vesicle Cycle Subnetwork default node	7	Gene names	true
Synaptic Vesicle Cycle Subnetwork default node	8	Gene names (primary )	true
Synaptic Vesicle Cycle Subnetwork default node	9	NexCre/wt	true
Synaptic Vesicle Cycle Subnetwork default node	10	Organism	true
Synaptic Vesicle Cycle Subnetwork default node	11	Organism ID	true
Synaptic Vesicle Cycle Subnetwork default node	12	Protein names	true
Synaptic Vesicle Cycle Subnetwork default node	13	Status	true
Synaptic Vesicle Cycle Subnetwork default node	14	Subcommunities	true
Subcommunities default node	0	SUID	false
Subcommunities default node	1	selected	false
Subcommunities default node	2	shared name	true
Subcommunities default node	3	name	true
Subcommunities default node	4	1_Localization	true
Subcommunities default node	5	APP-KO/wt	true
Subcommunities default node	6	Community	true
Subcommunities default node	7	Gene names	true
Subcommunities default node	8	Gene names (primary )	true
Subcommunities default node	9	NexCre/wt	true
Subcommunities default node	10	Organism	true
Subcommunities default node	11	Organism ID	true
Subcommunities default node	12	Protein names	true
Subcommunities default node	13	Status	true
Subcommunities default node	14	Subcommunities	true
