# Supplementary material for: APP Is a Context-Sensitive Regulator of the Hippocampal Presynaptic Active Zone
Source: PLOS journal article supplement (doi:10.1371/journal.pcbi.1004832), 2016-04-19
Supplement: S6 (10.1371/journal.pcbi.1004832.s006) [file journal.pcbi.1004832.s006.cys › CytoscapeSession-2016_01_22-10_07/apps/org.cytoscape.filter/filters.json]

[ {
  "name" : "Default filter",
  "transformers" : [ {
    "id" : "org.cytoscape.CompositeFilter",
    "parameters" : {
      "type" : "ALL"
    },
    "transformers" : [ ]
  } ]
} ]
