# Supplementary material for: APP Is a Context-Sensitive Regulator of the Hippocampal Presynaptic Active Zone
Source: PLOS journal article supplement (doi:10.1371/journal.pcbi.1004832), 2016-04-19
Supplement: S6 (10.1371/journal.pcbi.1004832.s006) [file journal.pcbi.1004832.s006.cys › CytoscapeSession-2016_01_22-10_07/apps/org.cytoscape.swing-application/network_list.xml]

<?xml version="1.0" encoding="UTF-8" standalone="yes"?>
<networkList>
    <network order="5" id="12178"/>
    <network order="6" id="12194"/>
    <network order="8" id="8163"/>
    <network order="7" id="8147"/>
    <network order="10" id="4132"/>
    <network order="0" id="36"/>
    <network order="9" id="4116"/>
    <network order="4" id="4105"/>
    <network order="2" id="4077"/>
    <network order="1" id="62"/>
    <network order="3" id="4095"/>
</networkList>
