# Supplementary material for: APP Is a Context-Sensitive Regulator of the Hippocampal Presynaptic Active Zone
Source: PLOS journal article supplement (doi:10.1371/journal.pcbi.1004832), 2016-04-19
Supplement: S6 (10.1371/journal.pcbi.1004832.s006) [file journal.pcbi.1004832.s006.cys › CytoscapeSession-2016_01_22-10_07/apps/org.cytoscape.swing-application/session_state.xml]

<?xml version="1.0" encoding="UTF-8" standalone="yes"?>
<sessionState>
    <networkFrames>
        <networkFrame y="0" x="0" networkViewID="16293"/>
        <networkFrame y="0" x="0" networkViewID="24540"/>
        <networkFrame y="0" x="0" networkViewID="20533"/>
        <networkFrame y="0" x="0" networkViewID="28547"/>
    </networkFrames>
    <cytopanels>
        <cytopanel id="CytoPanel1">
            <panelState>DOCK</panelState>
            <selectedPanel>0</selectedPanel>
        </cytopanel>
        <cytopanel id="CytoPanel2">
            <panelState>DOCK</panelState>
            <selectedPanel>0</selectedPanel>
        </cytopanel>
        <cytopanel id="CytoPanel3">
            <panelState>HIDE</panelState>
            <selectedPanel>-1</selectedPanel>
        </cytopanel>
    </cytopanels>
</sessionState>
