# Supplementary material for: APP Is a Context-Sensitive Regulator of the Hippocampal Presynaptic Active Zone
Source: PLOS journal article supplement (doi:10.1371/journal.pcbi.1004832), 2016-04-19
Supplement: S6 (10.1371/journal.pcbi.1004832.s006) [file journal.pcbi.1004832.s006.cys › CytoscapeSession-2016_01_22-10_07/apps/org.genemania/app.properties]

#
#Fri Jan 22 10:07:51 CET 2016
genemania.datasource=C\:\\Users\\PVancura\\Documents\\genemania_plugin\\gmdata-2014-08-12
