# Supplementary material for: APP Is a Context-Sensitive Regulator of the Hippocampal Presynaptic Active Zone
Source: PLOS journal article supplement (doi:10.1371/journal.pcbi.1004832), 2016-04-19
Supplement: S6 (10.1371/journal.pcbi.1004832.s006) [file journal.pcbi.1004832.s006.cys › CytoscapeSession-2016_01_22-10_07/networks/36-Basic+Network.xgmml]

<?xml version="1.0" encoding="UTF-8" standalone="yes"?>
<graph id="36" label="Basic Network" cy:view="0" cy:registered="0" cy:documentVersion="3.0" xmlns:dc="http://purl.org/dc/elements/1.1/" xmlns:xlink="http://www.w3.org/1999/xlink" xmlns:rdf="http://www.w3.org/1999/02/22-rdf-syntax-ns#" xmlns:cy="http://www.cytoscape.org" xmlns="http://www.cs.rpi.edu/XGMML">
  <att>
    <graph id="52" label="52" cy:registered="0">
    </graph>
  </att>
  <att>
    <graph id="62" label="Core Network PAZ" cy:registered="1">
      <node id="686" label="Q01097"/>
      <node id="685" label="Q80Z38"/>
      <node id="684" label="Q9CQZ5"/>
      <node id="683" label="Q9D6J6"/>
      <node id="682" label="O08749"/>
      <node id="681" label="Q9D051"/>
      <node id="680" label="Q9D3D9"/>
      <node id="679" label="O09111"/>
      <node id="678" label="Q03265"/>
      <node id="677" label="P68510"/>
      <node id="676" label="P12382"/>
      <node id="675" label="P35438"/>
      <node id="674" label="P05202"/>
      <node id="673" label="Q9QUI0"/>
      <node id="672" label="Q06335"/>
      <node id="671" label="P23819"/>
      <node id="670" label="P35436"/>
      <node id="669" label="Q9CZU6"/>
      <node id="668" label="Q9DCD0"/>
      <node id="667" label="P51863"/>
      <node id="666" label="Q9Z1G3"/>
      <node id="665" label="P62259"/>
      <node id="664" label="P47757"/>
      <node id="663" label="Q8C8R3"/>
      <node id="662" label="P16546"/>
      <node id="661" label="P63330"/>
      <node id="660" label="Q76MZ3"/>
      <node id="659" label="Q9CQZ6"/>
      <node id="658" label="Q9CQ54"/>
      <node id="657" label="Q9DCT2"/>
      <node id="656" label="Q9CQ69"/>
      <node id="655" label="P08249"/>
      <node id="654" label="Q9D6R2"/>
      <node id="653" label="P54071"/>
      <node id="652" label="P06151"/>
      <node id="651" label="Q9DB20"/>
      <node id="650" label="Q9CQH3"/>
      <node id="649" label="Q3UHD9"/>
      <node id="648" label="Q9Z2H5"/>
      <node id="647" label="Q6P9K8"/>
      <node id="646" label="O88952"/>
      <node id="645" label="P19783"/>
      <node id="644" label="Q8BK64"/>
      <node id="643" label="P63038"/>
      <node id="642" label="Q8BH95"/>
      <node id="641" label="Q9CZ13"/>
      <node id="640" label="Q9D0M3"/>
      <node id="639" label="Q99LC3"/>
      <node id="638" label="Q99LY9"/>
      <node id="637" label="Q8BMF4"/>
      <node id="636" label="Q05920"/>
      <node id="635" label="P63085"/>
      <node id="634" label="P61027"/>
      <node id="633" label="Q61598"/>
      <node id="632" label="P56480"/>
      <node id="631" label="P17742"/>
      <node id="630" label="P68404"/>
      <node id="629" label="P67778"/>
      <node id="628" label="Q9JLJ2"/>
      <node id="627" label="Q91VR2"/>
      <node id="626" label="Q9CPQ8"/>
      <node id="625" label="Q91VD9"/>
      <node id="624" label="Q9DCS9"/>
      <node id="623" label="Q9CR68"/>
      <node id="622" label="P52196"/>
      <node id="621" label="P05132"/>
      <node id="620" label="Q9CQJ8"/>
      <node id="619" label="Q06185"/>
      <node id="618" label="Q9DC70"/>
      <node id="617" label="Q9D0S9"/>
      <node id="616" label="Q9D1K2"/>
      <node id="615" label="Q9Z1G4"/>
      <node id="614" label="Q9WUM5"/>
      <node id="613" label="Q9D0K2"/>
      <node id="612" label="Q9CQN1"/>
      <node id="611" label="P63037"/>
      <node id="610" label="Q9DCW4"/>
      <node id="609" label="Q9CPP6"/>
      <node id="608" label="P15105"/>
      <node id="607" label="P46460"/>
      <node id="606" label="Q08331"/>
      <node id="605" label="Q9CQ62"/>
      <node id="604" label="P62897"/>
      <node id="603" label="Q9D2G2"/>
      <node id="602" label="Q3UIU2"/>
      <node id="601" label="P31938"/>
      <node id="600" label="P17427"/>
      <node id="599" label="P17426"/>
      <node id="598" label="P57746"/>
      <node id="597" label="P50516"/>
      <node id="596" label="P70404"/>
      <node id="595" label="O88441"/>
      <node id="594" label="Q7TQI3"/>
      <node id="593" label="P17751"/>
      <node id="592" label="P09411"/>
      <node id="591" label="Q9Z1P6"/>
      <node id="590" label="P63137"/>
      <node id="589" label="P62812"/>
      <node id="588" label="O70325"/>
      <node id="587" label="P48771"/>
      <node id="586" label="Q64133"/>
      <node id="585" label="P47738"/>
      <node id="584" label="P63005"/>
      <node id="583" label="Q6PER3"/>
      <node id="582" label="O70161"/>
      <node id="581" label="Q9Z1B3"/>
      <node id="580" label="Q921G7"/>
      <node id="579" label="Q8BWT1"/>
      <node id="578" label="Q9CQA3"/>
      <node id="577" label="P12787"/>
      <node id="576" label="Q61425"/>
      <node id="575" label="Q99LC5"/>
      <node id="574" label="Q8BGH2"/>
      <node id="573" label="Q99LX0"/>
      <node id="572" label="P62331"/>
      <node id="571" label="Q8K1Z0"/>
      <node id="570" label="P11499"/>
      <node id="569" label="P05064"/>
      <node id="568" label="P17710"/>
      <node id="567" label="P48320"/>
      <node id="566" label="P61922"/>
      <node id="565" label="P12023"/>
      <node id="564" label="P62814"/>
      <node id="563" label="Q9WV92"/>
      <node id="562" label="Q8R5M8"/>
      <node id="561" label="O35526"/>
      <node id="560" label="Q9WV18"/>
      <node id="559" label="P56391"/>
      <node id="558" label="Q9D172"/>
      <node id="557" label="Q62442"/>
      <node id="556" label="P26443"/>
      <node id="555" label="Q91Z53"/>
      <node id="554" label="Q99KJ8"/>
      <node id="553" label="O08788"/>
      <node id="552" label="Q99KI0"/>
      <node id="551" label="Q9ERS2"/>
      <node id="550" label="P97807"/>
      <node id="549" label="Q6PHZ2"/>
      <node id="548" label="P60710"/>
      <node id="547" label="Q02248"/>
      <node id="546" label="P05480"/>
      <node id="545" label="P51881"/>
      <node id="544" label="Q91WD5"/>
      <node id="543" label="Q8K2B3"/>
      <node id="542" label="P68369"/>
      <node id="541" label="Q8VEM8"/>
      <node id="540" label="Q3ULD5"/>
      <node id="539" label="Q8R4N0"/>
      <node id="538" label="P52503"/>
      <node id="537" label="Q60631"/>
      <node id="536" label="Q62277"/>
      <node id="535" label="P62073"/>
      <node id="534" label="P99029"/>
      <node id="533" label="Q9CQV8"/>
      <node id="532" label="Q9CQR4"/>
      <node id="531" label="P40142"/>
      <node id="530" label="P63213"/>
      <node id="529" label="P62874"/>
      <node id="528" label="Q9EQ20"/>
      <node id="527" label="Q99KR7"/>
      <node id="526" label="O35658"/>
      <node id="525" label="Q7TMF3"/>
      <node id="524" label="Q9DCX2"/>
      <node id="523" label="Q61735"/>
      <node id="522" label="P97797"/>
      <node id="521" label="P50518"/>
      <node id="520" label="Q8BVE3"/>
      <node id="519" label="Q9JLB0"/>
      <node id="518" label="Q99N28"/>
      <node id="517" label="P19536"/>
      <node id="516" label="Q60864"/>
      <node id="515" label="Q9QYJ0"/>
      <node id="514" label="Q68FD5"/>
      <node id="513" label="Q9R0Q6"/>
      <node id="512" label="Q9JM76"/>
      <node id="511" label="Q91YT0"/>
      <node id="510" label="Q9DCJ5"/>
      <node id="509" label="P60879"/>
      <node id="508" label="P28660"/>
      <node id="507" label="O08756"/>
      <node id="506" label="Q99JY0"/>
      <node id="505" label="P04925"/>
      <node id="504" label="P39688"/>
      <node id="503" label="P49615"/>
      <node id="502" label="P03930"/>
      <node id="501" label="Q9CQ75"/>
      <node id="500" label="P18872"/>
      <node id="499" label="Q8VDD5"/>
      <node id="498" label="P51174"/>
      <node id="497" label="Q8JZQ2"/>
      <node id="496" label="Q8JZN5"/>
      <node id="495" label="Q60676"/>
      <node id="494" label="Q9CXZ1"/>
      <node id="493" label="Q8BG51"/>
      <node id="492" label="P63001"/>
      <node id="491" label="Q62351"/>
      <node id="490" label="P63044"/>
      <node id="489" label="P46660"/>
      <node id="488" label="Q9JHU4"/>
      <node id="487" label="Q9D855"/>
      <node id="486" label="Q8K3J1"/>
      <node id="485" label="Q9DB77"/>
      <node id="484" label="Q91VM9"/>
      <node id="483" label="Q9DC69"/>
      <node id="482" label="Q9JJV2"/>
      <node id="481" label="Q9CQQ7"/>
      <node id="480" label="O88696"/>
      <node id="479" label="O35129"/>
      <node id="478" label="Q9CZS1"/>
      <node id="477" label="P70232"/>
      <node id="476" label="P18052"/>
      <node id="475" label="P56379"/>
      <node id="474" label="Q9D023"/>
      <node id="473" label="P12367"/>
      <node id="472" label="Q61548"/>
      <node id="471" label="P45878"/>
      <node id="470" label="P63017"/>
      <node id="469" label="Q9D898"/>
      <node id="468" label="Q80T41"/>
      <node id="467" label="Q9R0K7"/>
      <node id="466" label="P13707"/>
      <node id="465" label="Q64521"/>
      <node id="464" label="Q9QUH0"/>
      <node id="463" label="P20108"/>
      <node id="462" label="Q9JLM8"/>
      <node id="461" label="Q64010"/>
      <node id="460" label="P97450"/>
      <node id="459" label="O88935"/>
      <node id="458" label="P62823"/>
      <node id="457" label="Q99PT1"/>
      <node id="456" label="Q99MN9"/>
      <node id="455" label="Q99JY9"/>
      <node id="454" label="P14094"/>
      <node id="453" label="P47754"/>
      <node id="452" label="Q9CZT8"/>
      <node id="451" label="P35486"/>
      <node id="450" label="P22315"/>
      <node id="449" label="Q61102"/>
      <node id="448" label="P62962"/>
      <node id="447" label="P16054"/>
      <node id="446" label="P09671"/>
      <node id="445" label="P18572"/>
      <node id="444" label="O35465"/>
      <node id="443" label="Q8BPN8"/>
      <node id="442" label="P63082"/>
      <node id="441" label="Q9CQ92"/>
      <node id="440" label="Q8K1M6"/>
      <node id="439" label="Q9DBL1"/>
      <node id="438" label="P53395"/>
      <node id="437" label="Q9JHI5"/>
      <node id="436" label="Q93092"/>
      <node id="435" label="P52480"/>
      <node id="434" label="Q9DB05"/>
      <node id="433" label="Q61301"/>
      <node id="432" label="Q9Z2I9"/>
      <node id="431" label="P50544"/>
      <node id="430" label="Q61831"/>
      <node id="429" label="P63040"/>
      <node id="428" label="Q923T9"/>
      <node id="427" label="Q920I9"/>
      <node id="426" label="P06745"/>
      <node id="425" label="Q3UTJ2"/>
      <node id="424" label="Q7TPR4"/>
      <node id="423" label="P61264"/>
      <node id="422" label="P70441"/>
      <node id="421" label="P26040"/>
      <node id="420" label="Q9EP69"/>
      <node id="419" label="Q62420"/>
      <node id="418" label="P43024"/>
      <node id="417" label="P14873"/>
      <node id="416" label="P09103"/>
      <node id="415" label="P56382"/>
      <node id="414" label="Q3UMR5"/>
      <node id="413" label="Q91ZA3"/>
      <node id="412" label="Q61879"/>
      <node id="411" label="P63101"/>
      <node id="410" label="Q9QWI6"/>
      <node id="409" label="Q8R001"/>
      <node id="408" label="Q9DBF1"/>
      <node id="407" label="Q64516"/>
      <node id="406" label="Q8VDN2"/>
      <node id="405" label="Q6PCP5"/>
      <node id="404" label="P23506"/>
      <node id="403" label="Q9D6J5"/>
      <node id="402" label="Q00612"/>
      <node id="401" label="Q9WTT4"/>
      <node id="400" label="Q5FWK3"/>
      <node id="399" label="Q8CHU3"/>
      <node id="398" label="P59999"/>
      <node id="397" label="Q9CVB6"/>
      <node id="396" label="Q9CQC7"/>
      <node id="395" label="O88737"/>
      <node id="394" label="Q6PH08"/>
      <node id="393" label="P39053"/>
      <node id="392" label="Q6PB66"/>
      <node id="391" label="P31324"/>
      <node id="390" label="Q8BR92"/>
      <node id="389" label="P97772"/>
      <node id="388" label="Q8CHT0"/>
      <node id="387" label="P29758"/>
      <node id="386" label="Q99L47"/>
      <node id="385" label="Q7TQF7"/>
      <node id="384" label="P15116"/>
      <node id="383" label="P06837"/>
      <node id="382" label="P07901"/>
      <node id="381" label="P61982"/>
      <node id="380" label="Q9WUA3"/>
      <node id="379" label="Q60597"/>
      <node id="378" label="P05063"/>
      <node id="377" label="Q8BKZ9"/>
      <node id="376" label="Q9CPW4"/>
      <node id="375" label="P17182"/>
      <node id="374" label="Q8BMS1"/>
      <node id="373" label="Q9Z268"/>
      <node id="372" label="Q8BGD5"/>
      <node id="371" label="P42125"/>
      <node id="370" label="Q61290"/>
      <node id="369" label="Q8R0S4"/>
      <node id="368" label="P08226"/>
      <node id="367" label="Q91ZX7"/>
      <node id="366" label="Q8BLK3"/>
      <node id="365" label="P62835"/>
      <node id="364" label="Q6R891"/>
      <node id="363" label="P60766"/>
      <node id="362" label="Q99104"/>
      <node id="361" label="Q62048"/>
      <node id="360" label="Q9D6M3"/>
      <node id="359" label="P47857"/>
      <node id="358" label="P68368"/>
      <node id="357" label="Q922R8"/>
      <node id="356" label="P10637"/>
      <node id="355" label="P55088"/>
      <node id="354" label="Q9DBG3"/>
      <node id="353" label="Q6IRU5"/>
      <node id="352" label="P17183"/>
      <node id="351" label="Q9QXS6"/>
      <node id="350" label="Q8BHL5"/>
      <node id="349" label="O88712"/>
      <node id="348" label="Q9DCB8"/>
      <node id="347" label="Q9Z1J3"/>
      <node id="346" label="Q8BMF3"/>
      <node id="345" label="Q62425"/>
      <node id="344" label="P38647"/>
      <node id="343" label="P63011"/>
      <node id="342" label="Q60598"/>
      <node id="341" label="P61161"/>
      <node id="340" label="Q9Z0X1"/>
      <node id="339" label="Q8VDP6"/>
      <node id="338" label="Q99L43"/>
      <node id="337" label="Q8CAQ8"/>
      <node id="336" label="Q9JLZ3"/>
      <node id="335" label="P17665"/>
      <node id="334" label="Q60931"/>
      <node id="333" label="Q8QZT1"/>
      <node id="332" label="Q8VD37"/>
      <node id="331" label="P16858"/>
      <node id="330" label="P62746"/>
      <node id="329" label="P11627"/>
      <node id="328" label="P13595"/>
      <node id="327" label="Q8BKX1"/>
      <node id="326" label="O70589"/>
      <node id="325" label="P16330"/>
      <node id="324" label="P03995"/>
      <node id="323" label="P99024"/>
      <node id="322" label="Q9Z218"/>
      <node id="321" label="P84091"/>
      <node id="320" label="Q9QXJ1"/>
      <node id="319" label="P68033"/>
      <node id="318" label="Q9R0Y5"/>
      <node id="317" label="P47802"/>
      <node id="316" label="Q6PIE5"/>
      <node id="315" label="P70414"/>
      <node id="314" label="P28652"/>
      <node id="313" label="Q99K85"/>
      <node id="312" label="P17156"/>
      <node id="311" label="P62204"/>
      <node id="310" label="P68254"/>
      <node id="309" label="Q9DBJ1"/>
      <node id="308" label="P23818"/>
      <node id="307" label="Q68FF6"/>
      <node id="306" label="P30999"/>
      <node id="305" label="P62482"/>
      <node id="304" label="Q60996"/>
      <node id="303" label="Q9R0N7"/>
      <node id="302" label="Q62261"/>
      <node id="301" label="Q925I1"/>
      <node id="300" label="P48453"/>
      <node id="299" label="Q4ACU6"/>
      <node id="298" label="Q8BYM5"/>
      <node id="297" label="Q9JIS5"/>
      <node id="296" label="P40630"/>
      <node id="295" label="Q9CS84"/>
      <node id="294" label="O08539"/>
      <node id="293" label="O70318"/>
      <node id="292" label="Q64332"/>
      <node id="291" label="P60761"/>
      <node id="290" label="P00493"/>
      <node id="289" label="Q9Z0R4"/>
      <node id="288" label="Q80Y14"/>
      <node id="287" label="Q5SQX6"/>
      <node id="286" label="Q9CPQ1"/>
      <node id="285" label="Q3UHL1"/>
      <node id="284" label="Q60932"/>
      <node id="283" label="O08585"/>
      <node id="282" label="Q9QYR6"/>
      <node id="281" label="B9EKR1"/>
      <node id="280" label="O54991"/>
      <node id="279" label="P45376"/>
      <node id="278" label="Q62419"/>
      <node id="277" label="P60469"/>
      <node id="276" label="Q91ZJ5"/>
      <node id="275" label="P63328"/>
      <node id="274" label="O55042"/>
      <node id="273" label="P28667"/>
      <node id="272" label="Q9D8B3"/>
      <node id="271" label="P01831"/>
      <node id="270" label="P20357"/>
      <node id="269" label="Q3UVX5"/>
      <node id="268" label="Q91WC3"/>
      <node id="267" label="Q8BWF0"/>
      <node id="266" label="Q8BH04"/>
      <node id="265" label="Q99MR8"/>
      <node id="264" label="Q99PJ0"/>
      <node id="263" label="Q9D6F9"/>
      <node id="262" label="P41216"/>
      <node id="261" label="Q6P1F6"/>
      <node id="260" label="P28663"/>
      <node id="259" label="P68181"/>
      <node id="258" label="Q80VP1"/>
      <node id="257" label="Q6PIC6"/>
      <node id="256" label="Q9R111"/>
      <node id="255" label="Q9D0F9"/>
      <node id="254" label="Q62465"/>
      <node id="253" label="Q9WUB3"/>
      <node id="252" label="Q91VZ6"/>
      <node id="251" label="Q8CHC4"/>
      <node id="250" label="Q61411"/>
      <node id="249" label="Q60875"/>
      <node id="248" label="O55023"/>
      <node id="247" label="Q80UU9"/>
      <node id="246" label="Q9R0P9"/>
      <node id="245" label="P0C0A3"/>
      <node id="244" label="Q9WU78"/>
      <node id="243" label="P50396"/>
      <node id="242" label="P62821"/>
      <node id="241" label="Q9CQI6"/>
      <node id="240" label="Q9CRB9"/>
      <node id="239" label="P35279"/>
      <node id="238" label="Q9DC28"/>
      <node id="237" label="Q8VBV7"/>
      <node id="236" label="P47708"/>
      <node id="235" label="Q60605"/>
      <node id="234" label="P22723"/>
      <node id="233" label="P62743"/>
      <node id="232" label="P19246"/>
      <node id="231" label="Q80U28"/>
      <node id="230" label="Q61553"/>
      <node id="229" label="Q810U3"/>
      <node id="228" label="P67871"/>
      <node id="227" label="Q8R3V5"/>
      <node id="226" label="P58281"/>
      <node id="225" label="P27546"/>
      <node id="224" label="P63318"/>
      <node id="223" label="P70296"/>
      <node id="222" label="P56564"/>
      <node id="221" label="P00405"/>
      <node id="220" label="Q9EPJ9"/>
      <node id="219" label="Q5DQR4"/>
      <node id="218" label="O35239"/>
      <node id="217" label="Q8BW75"/>
      <node id="216" label="O08599"/>
      <node id="215" label="Q9QXS1"/>
      <node id="214" label="P20444"/>
      <node id="213" label="Q60930"/>
      <node id="212" label="Q99P72"/>
      <node id="211" label="O35643"/>
      <node id="210" label="Q8R191"/>
      <node id="209" label="P61164"/>
      <node id="208" label="O55100"/>
      <node id="207" label="Q5RJI5"/>
      <node id="206" label="Q8BZ98"/>
      <node id="205" label="Q61644"/>
      <node id="204" label="P19096"/>
      <node id="203" label="P35564"/>
      <node id="202" label="Q9CZ42"/>
      <node id="201" label="Q61490"/>
      <node id="200" label="P46096"/>
      <node id="199" label="Q922H2"/>
      <node id="198" label="P28740"/>
      <node id="197" label="Q9CWZ7"/>
      <node id="196" label="O35857"/>
      <node id="195" label="Q9D880"/>
      <node id="194" label="P43406"/>
      <node id="193" label="Q71LX4"/>
      <node id="192" label="P48962"/>
      <node id="191" label="Q8CI94"/>
      <node id="190" label="Q8K021"/>
      <node id="189" label="P63321"/>
      <node id="188" label="P48722"/>
      <node id="187" label="O35143"/>
      <node id="186" label="P84096"/>
      <node id="185" label="P26645"/>
      <node id="184" label="P28661"/>
      <node id="183" label="P42208"/>
      <node id="182" label="Q9WV34"/>
      <node id="181" label="Q9Z2Q6"/>
      <node id="180" label="Q9Z2I0"/>
      <node id="179" label="P18760"/>
      <node id="178" label="P40124"/>
      <node id="177" label="O54983"/>
      <node id="176" label="Q8VDQ8"/>
      <node id="175" label="P08551"/>
      <node id="174" label="Q8K4Z3"/>
      <node id="173" label="P08553"/>
      <node id="172" label="Q61699"/>
      <node id="171" label="P12960"/>
      <node id="170" label="Q7TSJ2"/>
      <node id="169" label="O35136"/>
      <node id="168" label="O55131"/>
      <node id="167" label="Q9WV55"/>
      <node id="166" label="Q7TMB8"/>
      <node id="165" label="Q80TZ3"/>
      <node id="164" label="O88643"/>
      <node id="163" label="Q8BIJ6"/>
      <node id="162" label="P55302"/>
      <node id="161" label="Q91XV3"/>
      <node id="160" label="P48758"/>
      <node id="159" label="Q9R1V6"/>
      <node id="158" label="P23242"/>
      <node id="157" label="Q9QY76"/>
      <node id="156" label="P57780"/>
      <node id="155" label="Q9CR16"/>
      <node id="154" label="Q99NE5"/>
      <node id="153" label="Q8K183"/>
      <node id="152" label="P11798"/>
      <node id="151" label="P48036"/>
      <node id="150" label="Q9D1T0"/>
      <node id="149" label="Q61316"/>
      <node id="148" label="O08917"/>
      <node id="147" label="Q60634"/>
      <node id="146" label="P97300"/>
      <node id="145" label="Q8CHH9"/>
      <node id="144" label="Q9CR62"/>
      <node id="143" label="Q91VR7"/>
      <node id="142" label="Q68FH0"/>
      <node id="141" label="Q7TMM9"/>
      <node id="140" label="Q2PFD7"/>
      <node id="139" label="Q920P5"/>
      <node id="138" label="Q3THE2"/>
      <node id="137" label="Q61151"/>
      <node id="136" label="Q91VT4"/>
      <node id="135" label="Q78IK2"/>
      <node id="134" label="Q8R5C5"/>
      <node id="133" label="Q03157"/>
      <node id="132" label="Q8CGK3"/>
      <node id="131" label="Q3ULJ0"/>
      <node id="130" label="Q61206"/>
      <node id="129" label="Q9QYA2"/>
      <node id="128" label="Q8R366"/>
      <node id="127" label="F6SEU4"/>
      <node id="126" label="Q921M7"/>
      <node id="125" label="Q8BH59"/>
      <node id="124" label="Q8BRT1"/>
      <node id="123" label="P20152"/>
      <node id="122" label="Q9CZW5"/>
      <node id="121" label="Q6P9K9"/>
      <node id="120" label="Q9CQW1"/>
      <node id="119" label="Q921J2"/>
      <node id="118" label="Q9ERD7"/>
      <node id="117" label="P43006"/>
      <node id="116" label="Q80XN0"/>
      <node id="115" label="Q9CWS0"/>
      <node id="114" label="Q8K0T0"/>
      <node id="113" label="P13020"/>
      <node id="112" label="Q61330"/>
      <node id="111" label="Q63810"/>
      <node id="110" label="Q9Z2W9"/>
      <node id="109" label="Q04447"/>
      <node id="108" label="Q9Z0P4"/>
      <node id="107" label="Q9D8Y0"/>
      <node id="106" label="Q9CYT6"/>
      <node id="105" label="Q99KB8"/>
      <node id="104" label="Q9D6K5"/>
      <node id="103" label="Q6URW6"/>
      <node id="102" label="Q9R1V7"/>
      <node id="101" label="Q9ES97"/>
      <node id="100" label="D3YVF0"/>
      <node id="99" label="Q810U4"/>
      <node id="98" label="A2CG49"/>
      <node id="97" label="P53994"/>
      <node id="96" label="O89053"/>
      <node id="95" label="Q9JIA1"/>
      <node id="94" label="Q91WS0"/>
      <node id="93" label="Q8K400"/>
      <node id="92" label="Q91ZZ3"/>
      <node id="91" label="Q9QZF2"/>
      <node id="90" label="Q812A2"/>
      <node id="89" label="Q9Z0E0"/>
      <node id="88" label="Q4KMM3"/>
      <node id="87" label="Q9CR95"/>
      <node id="86" label="Q60737"/>
      <node id="85" label="P80560"/>
      <node id="84" label="P35802"/>
      <node id="83" label="Q9EQZ6"/>
      <node id="82" label="P23927"/>
      <node id="81" label="Q9QYX7"/>
      <node id="80" label="Q03137"/>
      <node id="79" label="P58771"/>
      <node id="78" label="Q8VHW2"/>
      <node id="77" label="O54774"/>
      <node id="76" label="Q9DB73"/>
      <node id="75" label="O88342"/>
      <node id="74" label="Q9R0P5"/>
      <node id="73" label="Q9R1V4"/>
      <node id="72" label="Q00493"/>
      <edge id="4076" label="Q01097 (pp) Q80Z38" source="686" target="685" cy:directed="1"/>
      <edge id="4075" label="Q01097 (pp) P05132" source="686" target="621" cy:directed="1"/>
      <edge id="4074" label="Q01097 (pp) P15105" source="686" target="608" cy:directed="1"/>
      <edge id="4073" label="Q01097 (pp) O35526" source="686" target="561" cy:directed="1"/>
      <edge id="4072" label="Q01097 (pp) P51881" source="686" target="545" cy:directed="1"/>
      <edge id="4071" label="Q01097 (pp) P68510" source="686" target="677" cy:directed="1"/>
      <edge id="4070" label="Q01097 (pp) Q60676" source="686" target="495" cy:directed="1"/>
      <edge id="4069" label="Q01097 (pp) P12367" source="686" target="473" cy:directed="1"/>
      <edge id="4068" label="Q01097 (pp) P63085" source="686" target="635" cy:directed="1"/>
      <edge id="4067" label="Q01097 (pp) P47754" source="686" target="453" cy:directed="1"/>
      <edge id="4066" label="Q01097 (pp) Q03265" source="686" target="678" cy:directed="1"/>
      <edge id="4065" label="Q01097 (pp) P62835" source="686" target="365" cy:directed="1"/>
      <edge id="4064" label="Q01097 (pp) Q6PHZ2" source="686" target="549" cy:directed="1"/>
      <edge id="4063" label="Q01097 (pp) Q9D6M3" source="686" target="360" cy:directed="1"/>
      <edge id="4062" label="Q01097 (pp) P63101" source="686" target="411" cy:directed="1"/>
      <edge id="4061" label="Q01097 (pp) P17426" source="686" target="599" cy:directed="1"/>
      <edge id="4060" label="Q01097 (pp) P68033" source="686" target="319" cy:directed="1"/>
      <edge id="4059" label="Q01097 (pp) P68369" source="686" target="542" cy:directed="1"/>
      <edge id="4058" label="Q01097 (pp) P47757" source="686" target="664" cy:directed="1"/>
      <edge id="4057" label="Q01097 (pp) P05063" source="686" target="378" cy:directed="1"/>
      <edge id="4056" label="Q01097 (pp) P20357" source="686" target="270" cy:directed="1"/>
      <edge id="4055" label="Q01097 (pp) P31938" source="686" target="601" cy:directed="1"/>
      <edge id="4054" label="Q01097 (pp) P16054" source="686" target="447" cy:directed="1"/>
      <edge id="4053" label="Q01097 (pp) P51863" source="686" target="667" cy:directed="1"/>
      <edge id="4052" label="Q01097 (pp) P16858" source="686" target="331" cy:directed="1"/>
      <edge id="4051" label="Q01097 (pp) P06151" source="686" target="652" cy:directed="1"/>
      <edge id="4050" label="Q01097 (pp) P60879" source="686" target="509" cy:directed="1"/>
      <edge id="4049" label="Q01097 (pp) O88952" source="686" target="646" cy:directed="1"/>
      <edge id="4048" label="Q01097 (pp) P05480" source="686" target="546" cy:directed="1"/>
      <edge id="4047" label="Q01097 (pp) P50516" source="686" target="597" cy:directed="1"/>
      <edge id="4046" label="Q01097 (pp) P63318" source="686" target="224" cy:directed="1"/>
      <edge id="4045" label="Q01097 (pp) P97772" source="686" target="389" cy:directed="1"/>
      <edge id="4044" label="Q01097 (pp) P68404" source="686" target="630" cy:directed="1"/>
      <edge id="4043" label="Q01097 (pp) O55100" source="686" target="208" cy:directed="1"/>
      <edge id="4042" label="Q01097 (pp) Q91VR2" source="686" target="627" cy:directed="1"/>
      <edge id="4041" label="Q01097 (pp) P35279" source="686" target="239" cy:directed="1"/>
      <edge id="4040" label="Q01097 (pp) P63321" source="686" target="189" cy:directed="1"/>
      <edge id="4039" label="Q01097 (pp) P61982" source="686" target="381" cy:directed="1"/>
      <edge id="4038" label="Q01097 (pp) P60710" source="686" target="548" cy:directed="1"/>
      <edge id="4037" label="Q01097 (pp) P08553" source="686" target="173" cy:directed="1"/>
      <edge id="4036" label="Q01097 (pp) P62204" source="686" target="311" cy:directed="1"/>
      <edge id="4035" label="Q01097 (pp) Q61411" source="686" target="250" cy:directed="1"/>
      <edge id="4034" label="Q01097 (pp) P62259" source="686" target="665" cy:directed="1"/>
      <edge id="4033" label="Q01097 (pp) P48962" source="686" target="192" cy:directed="1"/>
      <edge id="4032" label="Q01097 (pp) O08599" source="686" target="216" cy:directed="1"/>
      <edge id="4031" label="Q01097 (pp) Q923T9" source="686" target="428" cy:directed="1"/>
      <edge id="4030" label="Q01097 (pp) Q9JM76" source="686" target="512" cy:directed="1"/>
      <edge id="4029" label="Q01097 (pp) P46096" source="686" target="200" cy:directed="1"/>
      <edge id="4028" label="Q01097 (pp) P63328" source="686" target="275" cy:directed="1"/>
      <edge id="4027" label="Q01097 (pp) P63001" source="686" target="492" cy:directed="1"/>
      <edge id="4026" label="Q01097 (pp) P59999" source="686" target="398" cy:directed="1"/>
      <edge id="4025" label="Q01097 (pp) F6SEU4" source="686" target="127" cy:directed="1"/>
      <edge id="4024" label="Q01097 (pp) P63011" source="686" target="343" cy:directed="1"/>
      <edge id="4023" label="Q01097 (pp) Q8BH59" source="686" target="125" cy:directed="1"/>
      <edge id="4022" label="Q01097 (pp) P17751" source="686" target="593" cy:directed="1"/>
      <edge id="4021" label="Q01097 (pp) O88737" source="686" target="395" cy:directed="1"/>
      <edge id="4020" label="Q01097 (pp) P06837" source="686" target="383" cy:directed="1"/>
      <edge id="4019" label="Q01097 (pp) P43006" source="686" target="117" cy:directed="1"/>
      <edge id="4018" label="Q01097 (pp) Q9CVB6" source="686" target="397" cy:directed="1"/>
      <edge id="4017" label="Q01097 (pp) P08551" source="686" target="175" cy:directed="1"/>
      <edge id="4016" label="Q01097 (pp) P11627" source="686" target="329" cy:directed="1"/>
      <edge id="4015" label="Q01097 (pp) P13020" source="686" target="113" cy:directed="1"/>
      <edge id="4014" label="Q01097 (pp) P05202" source="686" target="674" cy:directed="1"/>
      <edge id="4013" label="Q01097 (pp) P62874" source="686" target="529" cy:directed="1"/>
      <edge id="4012" label="Q01097 (pp) P35438" source="686" target="675" cy:directed="1"/>
      <edge id="4011" label="Q01097 (pp) P30999" source="686" target="306" cy:directed="1"/>
      <edge id="4010" label="Q01097 (pp) D3YVF0" source="686" target="100" cy:directed="1"/>
      <edge id="4009" label="Q01097 (pp) Q9QXS6" source="686" target="351" cy:directed="1"/>
      <edge id="4008" label="Q01097 (pp) P39053" source="686" target="393" cy:directed="1"/>
      <edge id="4007" label="Q01097 (pp) P63330" source="686" target="661" cy:directed="1"/>
      <edge id="4006" label="Q01097 (pp) P46660" source="686" target="489" cy:directed="1"/>
      <edge id="4005" label="Q01097 (pp) P53994" source="686" target="97" cy:directed="1"/>
      <edge id="4004" label="Q01097 (pp) P35436" source="686" target="670" cy:directed="1"/>
      <edge id="4003" label="Q01097 (pp) O35129" source="686" target="479" cy:directed="1"/>
      <edge id="4002" label="Q01097 (pp) P68181" source="686" target="259" cy:directed="1"/>
      <edge id="4001" label="Q01097 (pp) Q61879" source="686" target="412" cy:directed="1"/>
      <edge id="4000" label="Q01097 (pp) P31324" source="686" target="391" cy:directed="1"/>
      <edge id="3999" label="Q01097 (pp) P57780" source="686" target="156" cy:directed="1"/>
      <edge id="3998" label="Q01097 (pp) P15116" source="686" target="384" cy:directed="1"/>
      <edge id="3997" label="Q01097 (pp) A2CG49" source="686" target="98" cy:directed="1"/>
      <edge id="3996" label="Q01097 (pp) P12382" source="686" target="676" cy:directed="1"/>
      <edge id="3995" label="Q80Z38 (pp) Q8BYM5" source="685" target="298" cy:directed="1"/>
      <edge id="3994" label="Q80Z38 (pp) P35438" source="685" target="675" cy:directed="1"/>
      <edge id="3993" label="Q9CQZ5 (pp) Q9D6J6" source="684" target="683" cy:directed="1"/>
      <edge id="3992" label="Q9CQZ5 (pp) P48771" source="684" target="587" cy:directed="1"/>
      <edge id="3991" label="Q9CQZ5 (pp) Q91VR2" source="684" target="627" cy:directed="1"/>
      <edge id="3990" label="Q9CQZ5 (pp) Q91VD9" source="684" target="625" cy:directed="1"/>
      <edge id="3989" label="Q9CQZ5 (pp) Q9CPP6" source="684" target="609" cy:directed="1"/>
      <edge id="3988" label="Q9CQZ5 (pp) Q9CQZ6" source="684" target="659" cy:directed="1"/>
      <edge id="3987" label="Q9CQZ5 (pp) P19536" source="684" target="517" cy:directed="1"/>
      <edge id="3986" label="Q9CQZ5 (pp) O09111" source="684" target="679" cy:directed="1"/>
      <edge id="3985" label="Q9CQZ5 (pp) P97450" source="684" target="460" cy:directed="1"/>
      <edge id="3984" label="Q9CQZ5 (pp) Q91YT0" source="684" target="511" cy:directed="1"/>
      <edge id="3983" label="Q9CQZ5 (pp) Q9CQ69" source="684" target="656" cy:directed="1"/>
      <edge id="3982" label="Q9CQZ5 (pp) Q99LC5" source="684" target="575" cy:directed="1"/>
      <edge id="3981" label="Q9CQZ5 (pp) P99029" source="684" target="534" cy:directed="1"/>
      <edge id="3980" label="Q9CQZ5 (pp) Q9CPQ8" source="684" target="626" cy:directed="1"/>
      <edge id="3979" label="Q9CQZ5 (pp) Q9CQC7" source="684" target="396" cy:directed="1"/>
      <edge id="3978" label="Q9CQZ5 (pp) Q3UIU2" source="684" target="602" cy:directed="1"/>
      <edge id="3977" label="Q9CQZ5 (pp) Q9CQQ7" source="684" target="481" cy:directed="1"/>
      <edge id="3976" label="Q9CQZ5 (pp) Q62425" source="684" target="345" cy:directed="1"/>
      <edge id="3975" label="Q9CQZ5 (pp) Q9CR68" source="684" target="623" cy:directed="1"/>
      <edge id="3974" label="Q9CQZ5 (pp) Q9CZ13" source="684" target="641" cy:directed="1"/>
      <edge id="3973" label="Q9CQZ5 (pp) Q9DC69" source="684" target="483" cy:directed="1"/>
      <edge id="3972" label="Q9CQZ5 (pp) Q9D0S9" source="684" target="617" cy:directed="1"/>
      <edge id="3971" label="Q9CQZ5 (pp) Q99LC3" source="684" target="639" cy:directed="1"/>
      <edge id="3970" label="Q9CQZ5 (pp) Q9D6J5" source="684" target="403" cy:directed="1"/>
      <edge id="3969" label="Q9CQZ5 (pp) Q9DCS9" source="684" target="624" cy:directed="1"/>
      <edge id="3968" label="Q9CQZ5 (pp) Q06185" source="684" target="619" cy:directed="1"/>
      <edge id="3967" label="Q9CQZ5 (pp) Q9DCX2" source="684" target="524" cy:directed="1"/>
      <edge id="3966" label="Q9CQZ5 (pp) Q9DB20" source="684" target="651" cy:directed="1"/>
      <edge id="3965" label="Q9CQZ5 (pp) Q9CQ54" source="684" target="658" cy:directed="1"/>
      <edge id="3964" label="Q9CQZ5 (pp) Q9D3D9" source="684" target="680" cy:directed="1"/>
      <edge id="3963" label="Q9CQZ5 (pp) Q9ERS2" source="684" target="551" cy:directed="1"/>
      <edge id="3962" label="Q9CQZ5 (pp) Q9WUM5" source="684" target="614" cy:directed="1"/>
      <edge id="3961" label="Q9CQZ5 (pp) Q9DCJ5" source="684" target="510" cy:directed="1"/>
      <edge id="3960" label="Q9CQZ5 (pp) Q8K3J1" source="684" target="486" cy:directed="1"/>
      <edge id="3959" label="Q9CQZ5 (pp) Q9D0M3" source="684" target="640" cy:directed="1"/>
      <edge id="3958" label="Q9CQZ5 (pp) Q99LX0" source="684" target="573" cy:directed="1"/>
      <edge id="3957" label="Q9CQZ5 (pp) Q9CQH3" source="684" target="650" cy:directed="1"/>
      <edge id="3956" label="Q9CQZ5 (pp) Q9DB77" source="684" target="485" cy:directed="1"/>
      <edge id="3955" label="Q9CQZ5 (pp) Q9Z1P6" source="684" target="591" cy:directed="1"/>
      <edge id="3954" label="Q9D6J6 (pp) Q01097" source="683" target="686" cy:directed="1"/>
      <edge id="3953" label="O08749 (pp) Q9D051" source="682" target="681" cy:directed="1"/>
      <edge id="3952" label="O08749 (pp) P97807" source="682" target="550" cy:directed="1"/>
      <edge id="3951" label="O08749 (pp) Q91YT0" source="682" target="511" cy:directed="1"/>
      <edge id="3950" label="O08749 (pp) Q03265" source="682" target="678" cy:directed="1"/>
      <edge id="3949" label="O08749 (pp) Q99LC5" source="682" target="575" cy:directed="1"/>
      <edge id="3948" label="O08749 (pp) Q6PB66" source="682" target="392" cy:directed="1"/>
      <edge id="3947" label="O08749 (pp) Q60931" source="682" target="334" cy:directed="1"/>
      <edge id="3946" label="O08749 (pp) Q99KI0" source="682" target="552" cy:directed="1"/>
      <edge id="3945" label="O08749 (pp) Q9Z2I9" source="682" target="432" cy:directed="1"/>
      <edge id="3944" label="O08749 (pp) Q9WUM5" source="682" target="614" cy:directed="1"/>
      <edge id="3943" label="O08749 (pp) Q60597" source="682" target="379" cy:directed="1"/>
      <edge id="3942" label="O08749 (pp) Q9D6J6" source="682" target="683" cy:directed="1"/>
      <edge id="3941" label="O08749 (pp) Q8BKZ9" source="682" target="377" cy:directed="1"/>
      <edge id="3940" label="O08749 (pp) Q8BMF4" source="682" target="637" cy:directed="1"/>
      <edge id="3939" label="O08749 (pp) P63038" source="682" target="643" cy:directed="1"/>
      <edge id="3938" label="O08749 (pp) P99029" source="682" target="534" cy:directed="1"/>
      <edge id="3937" label="O08749 (pp) O88441" source="682" target="595" cy:directed="1"/>
      <edge id="3936" label="O08749 (pp) Q91VD9" source="682" target="625" cy:directed="1"/>
      <edge id="3935" label="O08749 (pp) Q9CQH3" source="682" target="650" cy:directed="1"/>
      <edge id="3934" label="O08749 (pp) P09671" source="682" target="446" cy:directed="1"/>
      <edge id="3933" label="O08749 (pp) Q91VR2" source="682" target="627" cy:directed="1"/>
      <edge id="3932" label="O08749 (pp) Q8K2B3" source="682" target="543" cy:directed="1"/>
      <edge id="3931" label="O08749 (pp) Q9CZU6" source="682" target="669" cy:directed="1"/>
      <edge id="3930" label="O08749 (pp) Q9CQA3" source="682" target="578" cy:directed="1"/>
      <edge id="3929" label="O08749 (pp) P52480" source="682" target="435" cy:directed="1"/>
      <edge id="3928" label="O08749 (pp) Q9DB77" source="682" target="485" cy:directed="1"/>
      <edge id="3927" label="O08749 (pp) P08249" source="682" target="655" cy:directed="1"/>
      <edge id="3926" label="O08749 (pp) Q9D2G2" source="682" target="603" cy:directed="1"/>
      <edge id="3925" label="O08749 (pp) Q9D6R2" source="682" target="654" cy:directed="1"/>
      <edge id="3924" label="O08749 (pp) P35486" source="682" target="451" cy:directed="1"/>
      <edge id="3923" label="O08749 (pp) Q91ZJ5" source="682" target="276" cy:directed="1"/>
      <edge id="3922" label="O08749 (pp) Q9DC69" source="682" target="483" cy:directed="1"/>
      <edge id="3921" label="O08749 (pp) P56480" source="682" target="632" cy:directed="1"/>
      <edge id="3920" label="Q9D051 (pp) Q03265" source="681" target="678" cy:directed="1"/>
      <edge id="3919" label="Q9D051 (pp) Q91VD9" source="681" target="625" cy:directed="1"/>
      <edge id="3918" label="Q9D051 (pp) Q8BMF4" source="681" target="637" cy:directed="1"/>
      <edge id="3917" label="Q9D051 (pp) Q9DB77" source="681" target="485" cy:directed="1"/>
      <edge id="3916" label="Q9D051 (pp) P63101" source="681" target="411" cy:directed="1"/>
      <edge id="3915" label="Q9D051 (pp) Q9CQQ7" source="681" target="481" cy:directed="1"/>
      <edge id="3914" label="Q9D051 (pp) P52480" source="681" target="435" cy:directed="1"/>
      <edge id="3913" label="Q9D051 (pp) Q9D6R2" source="681" target="654" cy:directed="1"/>
      <edge id="3912" label="Q9D051 (pp) P40142" source="681" target="531" cy:directed="1"/>
      <edge id="3911" label="Q9D051 (pp) P16054" source="681" target="447" cy:directed="1"/>
      <edge id="3910" label="Q9D051 (pp) P06151" source="681" target="652" cy:directed="1"/>
      <edge id="3909" label="Q9D051 (pp) P97450" source="681" target="460" cy:directed="1"/>
      <edge id="3908" label="Q9D051 (pp) Q8BMF3" source="681" target="346" cy:directed="1"/>
      <edge id="3907" label="Q9D051 (pp) P97807" source="681" target="550" cy:directed="1"/>
      <edge id="3906" label="Q9D051 (pp) Q9CQH3" source="681" target="650" cy:directed="1"/>
      <edge id="3905" label="Q9D051 (pp) Q9D0M3" source="681" target="640" cy:directed="1"/>
      <edge id="3904" label="Q9D051 (pp) Q9D2G2" source="681" target="603" cy:directed="1"/>
      <edge id="3903" label="Q9D051 (pp) Q9CR68" source="681" target="623" cy:directed="1"/>
      <edge id="3902" label="Q9D051 (pp) Q05920" source="681" target="636" cy:directed="1"/>
      <edge id="3901" label="Q9D051 (pp) Q9DCJ5" source="681" target="510" cy:directed="1"/>
      <edge id="3900" label="Q9D051 (pp) Q99LC5" source="681" target="575" cy:directed="1"/>
      <edge id="3899" label="Q9D051 (pp) P35486" source="681" target="451" cy:directed="1"/>
      <edge id="3898" label="Q9D051 (pp) Q93092" source="681" target="436" cy:directed="1"/>
      <edge id="3897" label="Q9D051 (pp) P06745" source="681" target="426" cy:directed="1"/>
      <edge id="3896" label="Q9D3D9 (pp) O09111" source="680" target="679" cy:directed="1"/>
      <edge id="3895" label="Q9D3D9 (pp) Q9ERS2" source="680" target="551" cy:directed="1"/>
      <edge id="3894" label="Q9D3D9 (pp) Q9CQH3" source="680" target="650" cy:directed="1"/>
      <edge id="3893" label="Q9D3D9 (pp) Q91VR2" source="680" target="627" cy:directed="1"/>
      <edge id="3892" label="Q9D3D9 (pp) Q99LY9" source="680" target="638" cy:directed="1"/>
      <edge id="3891" label="Q9D3D9 (pp) Q9D6J6" source="680" target="683" cy:directed="1"/>
      <edge id="3890" label="O09111 (pp) Q9CQH3" source="679" target="650" cy:directed="1"/>
      <edge id="3889" label="O09111 (pp) Q9D6J6" source="679" target="683" cy:directed="1"/>
      <edge id="3888" label="Q03265 (pp) P68510" source="678" target="677" cy:directed="1"/>
      <edge id="3887" label="Q03265 (pp) Q91VM9" source="678" target="484" cy:directed="1"/>
      <edge id="3886" label="Q03265 (pp) Q9DC69" source="678" target="483" cy:directed="1"/>
      <edge id="3885" label="Q03265 (pp) Q9CR68" source="678" target="623" cy:directed="1"/>
      <edge id="3884" label="Q03265 (pp) Q9DCX2" source="678" target="524" cy:directed="1"/>
      <edge id="3883" label="Q03265 (pp) Q91VD9" source="678" target="625" cy:directed="1"/>
      <edge id="3882" label="Q03265 (pp) Q9CZ13" source="678" target="641" cy:directed="1"/>
      <edge id="3881" label="Q03265 (pp) P97807" source="678" target="550" cy:directed="1"/>
      <edge id="3880" label="Q03265 (pp) P16054" source="678" target="447" cy:directed="1"/>
      <edge id="3879" label="Q03265 (pp) P09411" source="678" target="592" cy:directed="1"/>
      <edge id="3878" label="Q03265 (pp) Q8K3J1" source="678" target="486" cy:directed="1"/>
      <edge id="3877" label="Q03265 (pp) Q99LC5" source="678" target="575" cy:directed="1"/>
      <edge id="3876" label="Q03265 (pp) Q9R0Y5" source="678" target="318" cy:directed="1"/>
      <edge id="3875" label="Q03265 (pp) Q91VR2" source="678" target="627" cy:directed="1"/>
      <edge id="3874" label="Q03265 (pp) Q91YT0" source="678" target="511" cy:directed="1"/>
      <edge id="3873" label="Q03265 (pp) Q9WUM5" source="678" target="614" cy:directed="1"/>
      <edge id="3872" label="Q03265 (pp) Q06185" source="678" target="619" cy:directed="1"/>
      <edge id="3871" label="Q03265 (pp) Q9DB77" source="678" target="485" cy:directed="1"/>
      <edge id="3870" label="Q03265 (pp) P63038" source="678" target="643" cy:directed="1"/>
      <edge id="3869" label="Q03265 (pp) Q60931" source="678" target="334" cy:directed="1"/>
      <edge id="3868" label="Q03265 (pp) Q8VEM8" source="678" target="541" cy:directed="1"/>
      <edge id="3867" label="Q03265 (pp) Q9D2G2" source="678" target="603" cy:directed="1"/>
      <edge id="3866" label="Q03265 (pp) Q9D3D9" source="678" target="680" cy:directed="1"/>
      <edge id="3865" label="Q03265 (pp) P48962" source="678" target="192" cy:directed="1"/>
      <edge id="3864" label="Q03265 (pp) P19536" source="678" target="517" cy:directed="1"/>
      <edge id="3863" label="Q03265 (pp) P03930" source="678" target="502" cy:directed="1"/>
      <edge id="3862" label="Q03265 (pp) Q9CQQ7" source="678" target="481" cy:directed="1"/>
      <edge id="3861" label="Q03265 (pp) O35143" source="678" target="187" cy:directed="1"/>
      <edge id="3860" label="Q03265 (pp) Q9D6J6" source="678" target="683" cy:directed="1"/>
      <edge id="3859" label="Q03265 (pp) Q9CQH3" source="678" target="650" cy:directed="1"/>
      <edge id="3858" label="Q03265 (pp) P43024" source="678" target="418" cy:directed="1"/>
      <edge id="3857" label="P68510 (pp) P05202" source="677" target="674" cy:directed="1"/>
      <edge id="3856" label="P68510 (pp) P17751" source="677" target="593" cy:directed="1"/>
      <edge id="3855" label="P68510 (pp) Q99PT1" source="677" target="457" cy:directed="1"/>
      <edge id="3854" label="P68510 (pp) P68368" source="677" target="358" cy:directed="1"/>
      <edge id="3853" label="P68510 (pp) Q9D8B3" source="677" target="272" cy:directed="1"/>
      <edge id="3852" label="P68510 (pp) Q9CQ92" source="677" target="441" cy:directed="1"/>
      <edge id="3851" label="P68510 (pp) Q91VZ6" source="677" target="252" cy:directed="1"/>
      <edge id="3850" label="P68510 (pp) Q8VBV7" source="677" target="237" cy:directed="1"/>
      <edge id="3849" label="P68510 (pp) P08249" source="677" target="655" cy:directed="1"/>
      <edge id="3848" label="P68510 (pp) Q61553" source="677" target="230" cy:directed="1"/>
      <edge id="3847" label="P68510 (pp) P67871" source="677" target="228" cy:directed="1"/>
      <edge id="3846" label="P68510 (pp) O55042" source="677" target="274" cy:directed="1"/>
      <edge id="3845" label="P68510 (pp) P10637" source="677" target="356" cy:directed="1"/>
      <edge id="3844" label="P68510 (pp) P61164" source="677" target="209" cy:directed="1"/>
      <edge id="3843" label="P68510 (pp) Q9R0Q6" source="677" target="513" cy:directed="1"/>
      <edge id="3842" label="P68510 (pp) P63101" source="677" target="411" cy:directed="1"/>
      <edge id="3841" label="P68510 (pp) P48036" source="677" target="151" cy:directed="1"/>
      <edge id="3840" label="P68510 (pp) P50518" source="677" target="521" cy:directed="1"/>
      <edge id="3839" label="P68510 (pp) P12787" source="677" target="577" cy:directed="1"/>
      <edge id="3838" label="P68510 (pp) Q9CWS0" source="677" target="115" cy:directed="1"/>
      <edge id="3837" label="P68510 (pp) Q68FD5" source="677" target="514" cy:directed="1"/>
      <edge id="3836" label="P68510 (pp) P54071" source="677" target="653" cy:directed="1"/>
      <edge id="3835" label="P68510 (pp) Q9ERS2" source="677" target="551" cy:directed="1"/>
      <edge id="3834" label="P68510 (pp) P42208" source="677" target="183" cy:directed="1"/>
      <edge id="3833" label="P68510 (pp) P46460" source="677" target="607" cy:directed="1"/>
      <edge id="3832" label="P68510 (pp) Q60930" source="677" target="213" cy:directed="1"/>
      <edge id="3831" label="P68510 (pp) Q9DCW4" source="677" target="610" cy:directed="1"/>
      <edge id="3830" label="P68510 (pp) Q9WV55" source="677" target="167" cy:directed="1"/>
      <edge id="3829" label="P68510 (pp) P11499" source="677" target="570" cy:directed="1"/>
      <edge id="3828" label="P68510 (pp) Q9D051" source="677" target="681" cy:directed="1"/>
      <edge id="3827" label="P68510 (pp) P56480" source="677" target="632" cy:directed="1"/>
      <edge id="3826" label="P68510 (pp) Q9CQW1" source="677" target="120" cy:directed="1"/>
      <edge id="3825" label="P68510 (pp) Q9DCJ5" source="677" target="510" cy:directed="1"/>
      <edge id="3824" label="P68510 (pp) P62259" source="677" target="665" cy:directed="1"/>
      <edge id="3823" label="P12382 (pp) P35438" source="676" target="675" cy:directed="1"/>
      <edge id="3822" label="P12382 (pp) P17710" source="676" target="568" cy:directed="1"/>
      <edge id="3821" label="P12382 (pp) P05063" source="676" target="378" cy:directed="1"/>
      <edge id="3820" label="P12382 (pp) P05064" source="676" target="569" cy:directed="1"/>
      <edge id="3819" label="P12382 (pp) Q93092" source="676" target="436" cy:directed="1"/>
      <edge id="3818" label="P12382 (pp) P63101" source="676" target="411" cy:directed="1"/>
      <edge id="3817" label="P12382 (pp) P06745" source="676" target="426" cy:directed="1"/>
      <edge id="3816" label="P12382 (pp) P52480" source="676" target="435" cy:directed="1"/>
      <edge id="3815" label="P12382 (pp) P47857" source="676" target="359" cy:directed="1"/>
      <edge id="3814" label="P12382 (pp) P17751" source="676" target="593" cy:directed="1"/>
      <edge id="3813" label="P35438 (pp) P28652" source="675" target="314" cy:directed="1"/>
      <edge id="3812" label="P35438 (pp) Q6PIC6" source="675" target="257" cy:directed="1"/>
      <edge id="3811" label="P35438 (pp) Q60631" source="675" target="537" cy:directed="1"/>
      <edge id="3810" label="P35438 (pp) P68033" source="675" target="319" cy:directed="1"/>
      <edge id="3809" label="P35438 (pp) P06837" source="675" target="383" cy:directed="1"/>
      <edge id="3808" label="P35438 (pp) P68368" source="675" target="358" cy:directed="1"/>
      <edge id="3807" label="P35438 (pp) P62259" source="675" target="665" cy:directed="1"/>
      <edge id="3806" label="P35438 (pp) O55100" source="675" target="208" cy:directed="1"/>
      <edge id="3805" label="P35438 (pp) P57780" source="675" target="156" cy:directed="1"/>
      <edge id="3804" label="P35438 (pp) Q8BMF4" source="675" target="637" cy:directed="1"/>
      <edge id="3803" label="P35438 (pp) Q6URW6" source="675" target="103" cy:directed="1"/>
      <edge id="3802" label="P35438 (pp) O88737" source="675" target="395" cy:directed="1"/>
      <edge id="3801" label="P35438 (pp) A2CG49" source="675" target="98" cy:directed="1"/>
      <edge id="3800" label="P35438 (pp) P63017" source="675" target="470" cy:directed="1"/>
      <edge id="3799" label="P35438 (pp) P12367" source="675" target="473" cy:directed="1"/>
      <edge id="3798" label="P35438 (pp) O35526" source="675" target="561" cy:directed="1"/>
      <edge id="3797" label="P35438 (pp) F6SEU4" source="675" target="127" cy:directed="1"/>
      <edge id="3796" label="P35438 (pp) P11627" source="675" target="329" cy:directed="1"/>
      <edge id="3795" label="P05202 (pp) P54071" source="674" target="653" cy:directed="1"/>
      <edge id="3794" label="P05202 (pp) Q9D6R2" source="674" target="654" cy:directed="1"/>
      <edge id="3793" label="P05202 (pp) Q60597" source="674" target="379" cy:directed="1"/>
      <edge id="3792" label="P05202 (pp) Q05920" source="674" target="636" cy:directed="1"/>
      <edge id="3791" label="P05202 (pp) Q8BH04" source="674" target="266" cy:directed="1"/>
      <edge id="3790" label="P05202 (pp) P06151" source="674" target="652" cy:directed="1"/>
      <edge id="3789" label="P05202 (pp) P70404" source="674" target="596" cy:directed="1"/>
      <edge id="3788" label="Q9QUI0 (pp) Q06335" source="673" target="672" cy:directed="1"/>
      <edge id="3787" label="Q9QUI0 (pp) Q99PT1" source="673" target="457" cy:directed="1"/>
      <edge id="3786" label="Q9QUI0 (pp) P30999" source="673" target="306" cy:directed="1"/>
      <edge id="3785" label="Q9QUI0 (pp) P63001" source="673" target="492" cy:directed="1"/>
      <edge id="3784" label="Q9QUI0 (pp) O88643" source="673" target="164" cy:directed="1"/>
      <edge id="3783" label="Q06335 (pp) Q9QXJ1" source="672" target="320" cy:directed="1"/>
      <edge id="3782" label="Q06335 (pp) P63330" source="672" target="661" cy:directed="1"/>
      <edge id="3781" label="Q06335 (pp) P04925" source="672" target="505" cy:directed="1"/>
      <edge id="3780" label="Q06335 (pp) P12023" source="672" target="565" cy:directed="1"/>
      <edge id="3779" label="Q06335 (pp) P63001" source="672" target="492" cy:directed="1"/>
      <edge id="3778" label="Q06335 (pp) Q03157" source="672" target="133" cy:directed="1"/>
      <edge id="3777" label="P23819 (pp) P35436" source="671" target="670" cy:directed="1"/>
      <edge id="3776" label="P23819 (pp) P68369" source="671" target="542" cy:directed="1"/>
      <edge id="3775" label="P23819 (pp) P99024" source="671" target="323" cy:directed="1"/>
      <edge id="3774" label="P23819 (pp) O08599" source="671" target="216" cy:directed="1"/>
      <edge id="3773" label="P23819 (pp) P38647" source="671" target="344" cy:directed="1"/>
      <edge id="3772" label="P23819 (pp) P16330" source="671" target="325" cy:directed="1"/>
      <edge id="3771" label="P35436 (pp) P35438" source="670" target="675" cy:directed="1"/>
      <edge id="3770" label="Q9CZU6 (pp) Q9DCD0" source="669" target="668" cy:directed="1"/>
      <edge id="3769" label="Q9CZU6 (pp) Q91VD9" source="669" target="625" cy:directed="1"/>
      <edge id="3768" label="Q9CZU6 (pp) P05202" source="669" target="674" cy:directed="1"/>
      <edge id="3767" label="Q9CZU6 (pp) Q8BKZ9" source="669" target="377" cy:directed="1"/>
      <edge id="3766" label="Q9CZU6 (pp) Q8BMF3" source="669" target="346" cy:directed="1"/>
      <edge id="3765" label="Q9CZU6 (pp) P26443" source="669" target="556" cy:directed="1"/>
      <edge id="3764" label="Q9CZU6 (pp) P08249" source="669" target="655" cy:directed="1"/>
      <edge id="3763" label="Q9CZU6 (pp) Q91VR2" source="669" target="627" cy:directed="1"/>
      <edge id="3762" label="Q9CZU6 (pp) P97807" source="669" target="550" cy:directed="1"/>
      <edge id="3761" label="Q9CZU6 (pp) P06151" source="669" target="652" cy:directed="1"/>
      <edge id="3760" label="Q9CZU6 (pp) Q8K2B3" source="669" target="543" cy:directed="1"/>
      <edge id="3759" label="Q9CZU6 (pp) Q99KI0" source="669" target="552" cy:directed="1"/>
      <edge id="3758" label="Q9CZU6 (pp) Q8BWT1" source="669" target="579" cy:directed="1"/>
      <edge id="3757" label="Q9CZU6 (pp) Q91WD5" source="669" target="544" cy:directed="1"/>
      <edge id="3756" label="Q9CZU6 (pp) Q91YT0" source="669" target="511" cy:directed="1"/>
      <edge id="3755" label="Q9CZU6 (pp) Q03265" source="669" target="678" cy:directed="1"/>
      <edge id="3754" label="Q9CZU6 (pp) P52480" source="669" target="435" cy:directed="1"/>
      <edge id="3753" label="Q9CZU6 (pp) P09671" source="669" target="446" cy:directed="1"/>
      <edge id="3752" label="Q9CZU6 (pp) Q9D0M3" source="669" target="640" cy:directed="1"/>
      <edge id="3751" label="Q9CZU6 (pp) Q9CQA3" source="669" target="578" cy:directed="1"/>
      <edge id="3750" label="Q9CZU6 (pp) Q99JY0" source="669" target="506" cy:directed="1"/>
      <edge id="3749" label="Q9CZU6 (pp) Q8BMF4" source="669" target="637" cy:directed="1"/>
      <edge id="3748" label="Q9CZU6 (pp) Q8BH04" source="669" target="266" cy:directed="1"/>
      <edge id="3747" label="Q9CZU6 (pp) P35486" source="669" target="451" cy:directed="1"/>
      <edge id="3746" label="Q9CZU6 (pp) Q8BGH2" source="669" target="574" cy:directed="1"/>
      <edge id="3745" label="Q9CZU6 (pp) Q60597" source="669" target="379" cy:directed="1"/>
      <edge id="3744" label="Q9CZU6 (pp) Q9DB20" source="669" target="651" cy:directed="1"/>
      <edge id="3743" label="Q9CZU6 (pp) Q9D6R2" source="669" target="654" cy:directed="1"/>
      <edge id="3742" label="Q9CZU6 (pp) P70404" source="669" target="596" cy:directed="1"/>
      <edge id="3741" label="Q9CZU6 (pp) Q9WUM5" source="669" target="614" cy:directed="1"/>
      <edge id="3740" label="Q9CZU6 (pp) Q8QZT1" source="669" target="333" cy:directed="1"/>
      <edge id="3739" label="Q9CZU6 (pp) P56480" source="669" target="632" cy:directed="1"/>
      <edge id="3738" label="Q9CZU6 (pp) Q9D2G2" source="669" target="603" cy:directed="1"/>
      <edge id="3737" label="Q9CZU6 (pp) Q05920" source="669" target="636" cy:directed="1"/>
      <edge id="3736" label="Q9CZU6 (pp) Q9D6J6" source="669" target="683" cy:directed="1"/>
      <edge id="3735" label="Q9CZU6 (pp) Q9CZ13" source="669" target="641" cy:directed="1"/>
      <edge id="3734" label="Q9CZU6 (pp) Q9CR68" source="669" target="623" cy:directed="1"/>
      <edge id="3733" label="Q9CZU6 (pp) P19096" source="669" target="204" cy:directed="1"/>
      <edge id="3732" label="Q9DCD0 (pp) Q9D0F9" source="668" target="255" cy:directed="1"/>
      <edge id="3731" label="Q9DCD0 (pp) Q8BMS1" source="668" target="374" cy:directed="1"/>
      <edge id="3730" label="Q9DCD0 (pp) Q91ZJ5" source="668" target="276" cy:directed="1"/>
      <edge id="3729" label="Q9DCD0 (pp) P06151" source="668" target="652" cy:directed="1"/>
      <edge id="3728" label="Q9DCD0 (pp) Q8CAQ8" source="668" target="337" cy:directed="1"/>
      <edge id="3727" label="P51863 (pp) Q9Z1G3" source="667" target="666" cy:directed="1"/>
      <edge id="3726" label="P51863 (pp) P63082" source="667" target="442" cy:directed="1"/>
      <edge id="3725" label="P51863 (pp) Q8BVE3" source="667" target="520" cy:directed="1"/>
      <edge id="3724" label="P51863 (pp) P50516" source="667" target="597" cy:directed="1"/>
      <edge id="3723" label="P51863 (pp) P57746" source="667" target="598" cy:directed="1"/>
      <edge id="3722" label="P51863 (pp) Q9Z1G4" source="667" target="615" cy:directed="1"/>
      <edge id="3721" label="P51863 (pp) Q9EPJ9" source="667" target="220" cy:directed="1"/>
      <edge id="3720" label="P51863 (pp) P50518" source="667" target="521" cy:directed="1"/>
      <edge id="3719" label="P51863 (pp) Q9WTT4" source="667" target="401" cy:directed="1"/>
      <edge id="3718" label="Q9Z1G3 (pp) P62331" source="666" target="572" cy:directed="1"/>
      <edge id="3717" label="Q9Z1G3 (pp) Q9WTT4" source="666" target="401" cy:directed="1"/>
      <edge id="3716" label="Q9Z1G3 (pp) Q9Z1G4" source="666" target="615" cy:directed="1"/>
      <edge id="3715" label="Q9Z1G3 (pp) P50516" source="666" target="597" cy:directed="1"/>
      <edge id="3714" label="Q9Z1G3 (pp) Q91VM9" source="666" target="484" cy:directed="1"/>
      <edge id="3713" label="Q9Z1G3 (pp) Q8BVE3" source="666" target="520" cy:directed="1"/>
      <edge id="3712" label="Q9Z1G3 (pp) P63082" source="666" target="442" cy:directed="1"/>
      <edge id="3711" label="Q9Z1G3 (pp) P23506" source="666" target="404" cy:directed="1"/>
      <edge id="3710" label="P62259 (pp) P47757" source="665" target="664" cy:directed="1"/>
      <edge id="3709" label="P62259 (pp) P46660" source="665" target="489" cy:directed="1"/>
      <edge id="3708" label="P62259 (pp) Q9JLM8" source="665" target="462" cy:directed="1"/>
      <edge id="3707" label="P62259 (pp) O88935" source="665" target="459" cy:directed="1"/>
      <edge id="3706" label="P62259 (pp) P10637" source="665" target="356" cy:directed="1"/>
      <edge id="3705" label="P62259 (pp) P63101" source="665" target="411" cy:directed="1"/>
      <edge id="3704" label="P62259 (pp) Q9QWI6" source="665" target="410" cy:directed="1"/>
      <edge id="3703" label="P62259 (pp) P16858" source="665" target="331" cy:directed="1"/>
      <edge id="3702" label="P62259 (pp) Q9DC28" source="665" target="238" cy:directed="1"/>
      <edge id="3701" label="P62259 (pp) Q03265" source="665" target="678" cy:directed="1"/>
      <edge id="3700" label="P62259 (pp) P30999" source="665" target="306" cy:directed="1"/>
      <edge id="3699" label="P62259 (pp) Q61316" source="665" target="149" cy:directed="1"/>
      <edge id="3698" label="P62259 (pp) Q68FF6" source="665" target="307" cy:directed="1"/>
      <edge id="3697" label="P62259 (pp) Q3UTJ2" source="665" target="425" cy:directed="1"/>
      <edge id="3696" label="P62259 (pp) Q812A2" source="665" target="90" cy:directed="1"/>
      <edge id="3695" label="P47757 (pp) O89053" source="664" target="96" cy:directed="1"/>
      <edge id="3694" label="Q8C8R3 (pp) P16546" source="663" target="662" cy:directed="1"/>
      <edge id="3693" label="Q8C8R3 (pp) P11627" source="663" target="329" cy:directed="1"/>
      <edge id="3692" label="P16546 (pp) Q9CQV8" source="662" target="533" cy:directed="1"/>
      <edge id="3691" label="P16546 (pp) O08788" source="662" target="553" cy:directed="1"/>
      <edge id="3690" label="P63330 (pp) Q76MZ3" source="661" target="660" cy:directed="1"/>
      <edge id="3689" label="P63330 (pp) Q60996" source="661" target="304" cy:directed="1"/>
      <edge id="3688" label="P63330 (pp) Q61151" source="661" target="137" cy:directed="1"/>
      <edge id="3687" label="P63330 (pp) P35438" source="661" target="675" cy:directed="1"/>
      <edge id="3686" label="P63330 (pp) Q6P1F6" source="661" target="261" cy:directed="1"/>
      <edge id="3685" label="Q76MZ3 (pp) Q6P1F6" source="660" target="261" cy:directed="1"/>
      <edge id="3684" label="Q76MZ3 (pp) O08788" source="660" target="553" cy:directed="1"/>
      <edge id="3683" label="Q76MZ3 (pp) P63101" source="660" target="411" cy:directed="1"/>
      <edge id="3682" label="Q76MZ3 (pp) P35438" source="660" target="675" cy:directed="1"/>
      <edge id="3681" label="Q76MZ3 (pp) Q99KJ8" source="660" target="554" cy:directed="1"/>
      <edge id="3680" label="Q76MZ3 (pp) Q60996" source="660" target="304" cy:directed="1"/>
      <edge id="3679" label="Q76MZ3 (pp) P50396" source="660" target="243" cy:directed="1"/>
      <edge id="3678" label="Q76MZ3 (pp) P62259" source="660" target="665" cy:directed="1"/>
      <edge id="3677" label="Q76MZ3 (pp) P61982" source="660" target="381" cy:directed="1"/>
      <edge id="3676" label="Q76MZ3 (pp) P18052" source="660" target="476" cy:directed="1"/>
      <edge id="3675" label="Q76MZ3 (pp) Q61151" source="660" target="137" cy:directed="1"/>
      <edge id="3674" label="Q76MZ3 (pp) Q9DC28" source="660" target="238" cy:directed="1"/>
      <edge id="3673" label="Q9CQZ6 (pp) Q9CQ54" source="659" target="658" cy:directed="1"/>
      <edge id="3672" label="Q9CQZ6 (pp) Q99LC3" source="659" target="639" cy:directed="1"/>
      <edge id="3671" label="Q9CQZ6 (pp) Q3UIU2" source="659" target="602" cy:directed="1"/>
      <edge id="3670" label="Q9CQZ6 (pp) Q9CQH3" source="659" target="650" cy:directed="1"/>
      <edge id="3669" label="Q9CQZ6 (pp) Q9CR68" source="659" target="623" cy:directed="1"/>
      <edge id="3668" label="Q9CQZ6 (pp) Q9DCS9" source="659" target="624" cy:directed="1"/>
      <edge id="3667" label="Q9CQZ6 (pp) Q06185" source="659" target="619" cy:directed="1"/>
      <edge id="3666" label="Q9CQZ6 (pp) Q9D6J6" source="659" target="683" cy:directed="1"/>
      <edge id="3665" label="Q9CQZ6 (pp) Q9WUM5" source="659" target="614" cy:directed="1"/>
      <edge id="3664" label="Q9CQZ6 (pp) Q62425" source="659" target="345" cy:directed="1"/>
      <edge id="3663" label="Q9CQZ6 (pp) Q9ERS2" source="659" target="551" cy:directed="1"/>
      <edge id="3662" label="Q9CQZ6 (pp) Q8K3J1" source="659" target="486" cy:directed="1"/>
      <edge id="3661" label="Q9CQZ6 (pp) Q91YT0" source="659" target="511" cy:directed="1"/>
      <edge id="3660" label="Q9CQZ6 (pp) Q91VR2" source="659" target="627" cy:directed="1"/>
      <edge id="3659" label="Q9CQZ6 (pp) Q99LY9" source="659" target="638" cy:directed="1"/>
      <edge id="3658" label="Q9CQZ6 (pp) Q9DCX2" source="659" target="524" cy:directed="1"/>
      <edge id="3657" label="Q9CQZ6 (pp) Q9DB77" source="659" target="485" cy:directed="1"/>
      <edge id="3656" label="Q9CQZ6 (pp) P56391" source="659" target="559" cy:directed="1"/>
      <edge id="3655" label="Q9CQZ6 (pp) Q9DC69" source="659" target="483" cy:directed="1"/>
      <edge id="3654" label="Q9CQZ6 (pp) Q9Z1P6" source="659" target="591" cy:directed="1"/>
      <edge id="3653" label="Q9CQZ6 (pp) Q9CPQ8" source="659" target="626" cy:directed="1"/>
      <edge id="3652" label="Q9CQZ6 (pp) Q99LC5" source="659" target="575" cy:directed="1"/>
      <edge id="3651" label="Q9CQZ6 (pp) Q9DCJ5" source="659" target="510" cy:directed="1"/>
      <edge id="3650" label="Q9CQZ6 (pp) P48771" source="659" target="587" cy:directed="1"/>
      <edge id="3649" label="Q9CQZ6 (pp) Q9CQQ7" source="659" target="481" cy:directed="1"/>
      <edge id="3648" label="Q9CQZ6 (pp) Q99LX0" source="659" target="573" cy:directed="1"/>
      <edge id="3647" label="Q9CQZ6 (pp) Q9CQ69" source="659" target="656" cy:directed="1"/>
      <edge id="3646" label="Q9CQ54 (pp) Q91YT0" source="658" target="511" cy:directed="1"/>
      <edge id="3645" label="Q9CQ54 (pp) O09111" source="658" target="679" cy:directed="1"/>
      <edge id="3644" label="Q9CQ54 (pp) Q9DC69" source="658" target="483" cy:directed="1"/>
      <edge id="3643" label="Q9CQ54 (pp) Q9CQQ7" source="658" target="481" cy:directed="1"/>
      <edge id="3642" label="Q9CQ54 (pp) Q9DCJ5" source="658" target="510" cy:directed="1"/>
      <edge id="3641" label="Q9CQ54 (pp) Q06185" source="658" target="619" cy:directed="1"/>
      <edge id="3640" label="Q9CQ54 (pp) Q8K3J1" source="658" target="486" cy:directed="1"/>
      <edge id="3639" label="Q9CQ54 (pp) Q9CQ69" source="658" target="656" cy:directed="1"/>
      <edge id="3638" label="Q9CQ54 (pp) Q9D6J6" source="658" target="683" cy:directed="1"/>
      <edge id="3637" label="Q9CQ54 (pp) Q9DCS9" source="658" target="624" cy:directed="1"/>
      <edge id="3636" label="Q9CQ54 (pp) Q99LY9" source="658" target="638" cy:directed="1"/>
      <edge id="3635" label="Q9CQ54 (pp) Q9CQH3" source="658" target="650" cy:directed="1"/>
      <edge id="3634" label="Q9CQ54 (pp) Q9Z1P6" source="658" target="591" cy:directed="1"/>
      <edge id="3633" label="Q9CQ54 (pp) Q3UIU2" source="658" target="602" cy:directed="1"/>
      <edge id="3632" label="Q9DCT2 (pp) Q9CQ69" source="657" target="656" cy:directed="1"/>
      <edge id="3631" label="Q9DCT2 (pp) P19783" source="657" target="645" cy:directed="1"/>
      <edge id="3630" label="Q9DCT2 (pp) Q99LC3" source="657" target="639" cy:directed="1"/>
      <edge id="3629" label="Q9DCT2 (pp) O70325" source="657" target="588" cy:directed="1"/>
      <edge id="3628" label="Q9DCT2 (pp) Q9CQA3" source="657" target="578" cy:directed="1"/>
      <edge id="3627" label="Q9DCT2 (pp) Q8K1Z0" source="657" target="571" cy:directed="1"/>
      <edge id="3626" label="Q9DCT2 (pp) P19536" source="657" target="517" cy:directed="1"/>
      <edge id="3625" label="Q9DCT2 (pp) Q9DC70" source="657" target="618" cy:directed="1"/>
      <edge id="3624" label="Q9DCT2 (pp) Q3UIU2" source="657" target="602" cy:directed="1"/>
      <edge id="3623" label="Q9DCT2 (pp) Q9DB77" source="657" target="485" cy:directed="1"/>
      <edge id="3622" label="Q9DCT2 (pp) Q9CQQ7" source="657" target="481" cy:directed="1"/>
      <edge id="3621" label="Q9DCT2 (pp) Q9D6J6" source="657" target="683" cy:directed="1"/>
      <edge id="3620" label="Q9DCT2 (pp) Q9DCS9" source="657" target="624" cy:directed="1"/>
      <edge id="3619" label="Q9DCT2 (pp) Q9D3D9" source="657" target="680" cy:directed="1"/>
      <edge id="3618" label="Q9DCT2 (pp) P48771" source="657" target="587" cy:directed="1"/>
      <edge id="3617" label="Q9DCT2 (pp) P17751" source="657" target="593" cy:directed="1"/>
      <edge id="3616" label="Q9DCT2 (pp) Q8K3J1" source="657" target="486" cy:directed="1"/>
      <edge id="3615" label="Q9DCT2 (pp) Q91WD5" source="657" target="544" cy:directed="1"/>
      <edge id="3614" label="Q9DCT2 (pp) Q9D6J5" source="657" target="403" cy:directed="1"/>
      <edge id="3613" label="Q9DCT2 (pp) P56391" source="657" target="559" cy:directed="1"/>
      <edge id="3612" label="Q9DCT2 (pp) Q9ERS2" source="657" target="551" cy:directed="1"/>
      <edge id="3611" label="Q9DCT2 (pp) Q03265" source="657" target="678" cy:directed="1"/>
      <edge id="3610" label="Q9DCT2 (pp) Q8BGH2" source="657" target="574" cy:directed="1"/>
      <edge id="3609" label="Q9DCT2 (pp) Q9CQC7" source="657" target="396" cy:directed="1"/>
      <edge id="3608" label="Q9DCT2 (pp) Q9WUM5" source="657" target="614" cy:directed="1"/>
      <edge id="3607" label="Q9DCT2 (pp) Q9CQJ8" source="657" target="620" cy:directed="1"/>
      <edge id="3606" label="Q9DCT2 (pp) Q9CXZ1" source="657" target="494" cy:directed="1"/>
      <edge id="3605" label="Q9DCT2 (pp) Q99LC5" source="657" target="575" cy:directed="1"/>
      <edge id="3604" label="Q9DCT2 (pp) Q99LY9" source="657" target="638" cy:directed="1"/>
      <edge id="3603" label="Q9DCT2 (pp) Q7TMF3" source="657" target="525" cy:directed="1"/>
      <edge id="3602" label="Q9DCT2 (pp) Q9CR68" source="657" target="623" cy:directed="1"/>
      <edge id="3601" label="Q9DCT2 (pp) P42125" source="657" target="371" cy:directed="1"/>
      <edge id="3600" label="Q9DCT2 (pp) Q9CQZ6" source="657" target="659" cy:directed="1"/>
      <edge id="3599" label="Q9DCT2 (pp) P99029" source="657" target="534" cy:directed="1"/>
      <edge id="3598" label="Q9DCT2 (pp) Q9D051" source="657" target="681" cy:directed="1"/>
      <edge id="3597" label="Q9DCT2 (pp) Q9DC69" source="657" target="483" cy:directed="1"/>
      <edge id="3596" label="Q9DCT2 (pp) Q9D855" source="657" target="487" cy:directed="1"/>
      <edge id="3595" label="Q9DCT2 (pp) Q9DCX2" source="657" target="524" cy:directed="1"/>
      <edge id="3594" label="Q9DCT2 (pp) Q9CQR4" source="657" target="532" cy:directed="1"/>
      <edge id="3593" label="Q9DCT2 (pp) Q9DCJ5" source="657" target="510" cy:directed="1"/>
      <edge id="3592" label="Q9DCT2 (pp) P09671" source="657" target="446" cy:directed="1"/>
      <edge id="3591" label="Q9DCT2 (pp) P56480" source="657" target="632" cy:directed="1"/>
      <edge id="3590" label="Q9DCT2 (pp) Q8K2B3" source="657" target="543" cy:directed="1"/>
      <edge id="3589" label="Q9DCT2 (pp) Q9CQ75" source="657" target="501" cy:directed="1"/>
      <edge id="3588" label="Q9DCT2 (pp) P52503" source="657" target="538" cy:directed="1"/>
      <edge id="3587" label="Q9DCT2 (pp) Q91VD9" source="657" target="625" cy:directed="1"/>
      <edge id="3586" label="Q9DCT2 (pp) Q8BH95" source="657" target="642" cy:directed="1"/>
      <edge id="3585" label="Q9DCT2 (pp) Q91YT0" source="657" target="511" cy:directed="1"/>
      <edge id="3584" label="Q9DCT2 (pp) P56379" source="657" target="475" cy:directed="1"/>
      <edge id="3583" label="Q9DCT2 (pp) Q9CZ13" source="657" target="641" cy:directed="1"/>
      <edge id="3582" label="Q9DCT2 (pp) Q9DB20" source="657" target="651" cy:directed="1"/>
      <edge id="3581" label="Q9DCT2 (pp) Q8VEM8" source="657" target="541" cy:directed="1"/>
      <edge id="3580" label="Q9DCT2 (pp) Q9CPP6" source="657" target="609" cy:directed="1"/>
      <edge id="3579" label="Q9DCT2 (pp) Q9CQ54" source="657" target="658" cy:directed="1"/>
      <edge id="3578" label="Q9DCT2 (pp) Q9D0M3" source="657" target="640" cy:directed="1"/>
      <edge id="3577" label="Q9DCT2 (pp) Q99KI0" source="657" target="552" cy:directed="1"/>
      <edge id="3576" label="Q9DCT2 (pp) Q91VR2" source="657" target="627" cy:directed="1"/>
      <edge id="3575" label="Q9DCT2 (pp) O88441" source="657" target="595" cy:directed="1"/>
      <edge id="3574" label="Q9DCT2 (pp) Q9CQH3" source="657" target="650" cy:directed="1"/>
      <edge id="3573" label="Q9DCT2 (pp) Q62425" source="657" target="345" cy:directed="1"/>
      <edge id="3572" label="Q9DCT2 (pp) O09111" source="657" target="679" cy:directed="1"/>
      <edge id="3571" label="Q9DCT2 (pp) P68510" source="657" target="677" cy:directed="1"/>
      <edge id="3570" label="Q9DCT2 (pp) P62073" source="657" target="535" cy:directed="1"/>
      <edge id="3569" label="Q9DCT2 (pp) P08249" source="657" target="655" cy:directed="1"/>
      <edge id="3568" label="Q9DCT2 (pp) Q9CPQ1" source="657" target="286" cy:directed="1"/>
      <edge id="3567" label="Q9DCT2 (pp) Q9D0S9" source="657" target="617" cy:directed="1"/>
      <edge id="3566" label="Q9DCT2 (pp) P50516" source="657" target="597" cy:directed="1"/>
      <edge id="3565" label="Q9DCT2 (pp) P97807" source="657" target="550" cy:directed="1"/>
      <edge id="3564" label="Q9DCT2 (pp) Q9Z1P6" source="657" target="591" cy:directed="1"/>
      <edge id="3563" label="Q9DCT2 (pp) Q9CR62" source="657" target="144" cy:directed="1"/>
      <edge id="3562" label="Q9DCT2 (pp) Q9CZU6" source="657" target="669" cy:directed="1"/>
      <edge id="3561" label="Q9DCT2 (pp) Q80Y14" source="657" target="288" cy:directed="1"/>
      <edge id="3560" label="Q9DCT2 (pp) Q9CQZ5" source="657" target="684" cy:directed="1"/>
      <edge id="3559" label="Q9DCT2 (pp) P70404" source="657" target="596" cy:directed="1"/>
      <edge id="3558" label="Q9DCT2 (pp) Q06185" source="657" target="619" cy:directed="1"/>
      <edge id="3557" label="Q9DCT2 (pp) Q99LX0" source="657" target="573" cy:directed="1"/>
      <edge id="3556" label="Q9DCT2 (pp) P97450" source="657" target="460" cy:directed="1"/>
      <edge id="3555" label="Q9CQ69 (pp) P56391" source="656" target="559" cy:directed="1"/>
      <edge id="3554" label="Q9CQ69 (pp) Q8K3J1" source="656" target="486" cy:directed="1"/>
      <edge id="3553" label="Q9CQ69 (pp) Q99LY9" source="656" target="638" cy:directed="1"/>
      <edge id="3552" label="Q9CQ69 (pp) Q9D6J6" source="656" target="683" cy:directed="1"/>
      <edge id="3551" label="Q9CQ69 (pp) Q9DCJ5" source="656" target="510" cy:directed="1"/>
      <edge id="3550" label="Q9CQ69 (pp) Q9CQH3" source="656" target="650" cy:directed="1"/>
      <edge id="3549" label="Q9CQ69 (pp) Q9DC69" source="656" target="483" cy:directed="1"/>
      <edge id="3548" label="Q9CQ69 (pp) Q9ERS2" source="656" target="551" cy:directed="1"/>
      <edge id="3547" label="Q9CQ69 (pp) Q9D3D9" source="656" target="680" cy:directed="1"/>
      <edge id="3546" label="Q9CQ69 (pp) P00405" source="656" target="221" cy:directed="1"/>
      <edge id="3545" label="Q9CQ69 (pp) Q91VR2" source="656" target="627" cy:directed="1"/>
      <edge id="3544" label="Q9CQ69 (pp) Q3UIU2" source="656" target="602" cy:directed="1"/>
      <edge id="3543" label="Q9CQ69 (pp) P17665" source="656" target="335" cy:directed="1"/>
      <edge id="3542" label="Q9CQ69 (pp) O09111" source="656" target="679" cy:directed="1"/>
      <edge id="3541" label="Q9CQ69 (pp) Q9CQQ7" source="656" target="481" cy:directed="1"/>
      <edge id="3540" label="Q9CQ69 (pp) Q99LX0" source="656" target="573" cy:directed="1"/>
      <edge id="3539" label="P08249 (pp) Q9D6R2" source="655" target="654" cy:directed="1"/>
      <edge id="3538" label="P08249 (pp) Q06185" source="655" target="619" cy:directed="1"/>
      <edge id="3537" label="P08249 (pp) Q91VR2" source="655" target="627" cy:directed="1"/>
      <edge id="3536" label="P08249 (pp) P70404" source="655" target="596" cy:directed="1"/>
      <edge id="3535" label="P08249 (pp) O35658" source="655" target="526" cy:directed="1"/>
      <edge id="3534" label="P08249 (pp) P17751" source="655" target="593" cy:directed="1"/>
      <edge id="3533" label="P08249 (pp) Q9DCD0" source="655" target="668" cy:directed="1"/>
      <edge id="3532" label="P08249 (pp) P56480" source="655" target="632" cy:directed="1"/>
      <edge id="3531" label="P08249 (pp) Q9D3D9" source="655" target="680" cy:directed="1"/>
      <edge id="3530" label="P08249 (pp) P97807" source="655" target="550" cy:directed="1"/>
      <edge id="3529" label="P08249 (pp) Q64521" source="655" target="465" cy:directed="1"/>
      <edge id="3528" label="P08249 (pp) Q60931" source="655" target="334" cy:directed="1"/>
      <edge id="3527" label="P08249 (pp) Q8BGH2" source="655" target="574" cy:directed="1"/>
      <edge id="3526" label="P08249 (pp) Q9D051" source="655" target="681" cy:directed="1"/>
      <edge id="3525" label="P08249 (pp) Q9D855" source="655" target="487" cy:directed="1"/>
      <edge id="3524" label="P08249 (pp) Q8K2B3" source="655" target="543" cy:directed="1"/>
      <edge id="3523" label="P08249 (pp) P05202" source="655" target="674" cy:directed="1"/>
      <edge id="3522" label="P08249 (pp) Q9DC70" source="655" target="618" cy:directed="1"/>
      <edge id="3521" label="P08249 (pp) Q8BH04" source="655" target="266" cy:directed="1"/>
      <edge id="3520" label="P08249 (pp) P63038" source="655" target="643" cy:directed="1"/>
      <edge id="3519" label="P08249 (pp) Q9D6J6" source="655" target="683" cy:directed="1"/>
      <edge id="3518" label="P08249 (pp) Q9CQC7" source="655" target="396" cy:directed="1"/>
      <edge id="3517" label="P08249 (pp) Q9CR68" source="655" target="623" cy:directed="1"/>
      <edge id="3516" label="P08249 (pp) Q9DB77" source="655" target="485" cy:directed="1"/>
      <edge id="3515" label="P08249 (pp) P09411" source="655" target="592" cy:directed="1"/>
      <edge id="3514" label="P08249 (pp) Q9DC69" source="655" target="483" cy:directed="1"/>
      <edge id="3513" label="P08249 (pp) Q8K3J1" source="655" target="486" cy:directed="1"/>
      <edge id="3512" label="P08249 (pp) Q8BMF3" source="655" target="346" cy:directed="1"/>
      <edge id="3511" label="P08249 (pp) Q8BMF4" source="655" target="637" cy:directed="1"/>
      <edge id="3510" label="P08249 (pp) Q9CQJ8" source="655" target="620" cy:directed="1"/>
      <edge id="3509" label="P08249 (pp) Q8VEM8" source="655" target="541" cy:directed="1"/>
      <edge id="3508" label="P08249 (pp) Q99KI0" source="655" target="552" cy:directed="1"/>
      <edge id="3507" label="P08249 (pp) O09111" source="655" target="679" cy:directed="1"/>
      <edge id="3506" label="P08249 (pp) Q99LX0" source="655" target="573" cy:directed="1"/>
      <edge id="3505" label="P08249 (pp) Q9DCX2" source="655" target="524" cy:directed="1"/>
      <edge id="3504" label="P08249 (pp) Q05920" source="655" target="636" cy:directed="1"/>
      <edge id="3503" label="P08249 (pp) Q91YT0" source="655" target="511" cy:directed="1"/>
      <edge id="3502" label="P08249 (pp) Q9Z2I9" source="655" target="432" cy:directed="1"/>
      <edge id="3501" label="P08249 (pp) P19783" source="655" target="645" cy:directed="1"/>
      <edge id="3500" label="P08249 (pp) Q91VD9" source="655" target="625" cy:directed="1"/>
      <edge id="3499" label="P08249 (pp) Q9DB20" source="655" target="651" cy:directed="1"/>
      <edge id="3498" label="P08249 (pp) P54071" source="655" target="653" cy:directed="1"/>
      <edge id="3497" label="P08249 (pp) P52480" source="655" target="435" cy:directed="1"/>
      <edge id="3496" label="P08249 (pp) Q9D2G2" source="655" target="603" cy:directed="1"/>
      <edge id="3495" label="P08249 (pp) Q9DCJ5" source="655" target="510" cy:directed="1"/>
      <edge id="3494" label="P08249 (pp) P97450" source="655" target="460" cy:directed="1"/>
      <edge id="3493" label="P08249 (pp) Q9WUM5" source="655" target="614" cy:directed="1"/>
      <edge id="3492" label="P08249 (pp) P26443" source="655" target="556" cy:directed="1"/>
      <edge id="3491" label="P08249 (pp) Q9CQZ5" source="655" target="684" cy:directed="1"/>
      <edge id="3490" label="P08249 (pp) Q9CZ13" source="655" target="641" cy:directed="1"/>
      <edge id="3489" label="P08249 (pp) Q9D0M3" source="655" target="640" cy:directed="1"/>
      <edge id="3488" label="P08249 (pp) P06745" source="655" target="426" cy:directed="1"/>
      <edge id="3487" label="P08249 (pp) P48962" source="655" target="192" cy:directed="1"/>
      <edge id="3486" label="P08249 (pp) Q03265" source="655" target="678" cy:directed="1"/>
      <edge id="3485" label="P08249 (pp) Q9CQH3" source="655" target="650" cy:directed="1"/>
      <edge id="3484" label="P08249 (pp) Q9CQQ7" source="655" target="481" cy:directed="1"/>
      <edge id="3483" label="P08249 (pp) Q9DCS9" source="655" target="624" cy:directed="1"/>
      <edge id="3482" label="Q9D6R2 (pp) P70404" source="654" target="596" cy:directed="1"/>
      <edge id="3481" label="Q9D6R2 (pp) P16054" source="654" target="447" cy:directed="1"/>
      <edge id="3480" label="Q9D6R2 (pp) Q8BWF0" source="654" target="267" cy:directed="1"/>
      <edge id="3479" label="Q9D6R2 (pp) Q91VR2" source="654" target="627" cy:directed="1"/>
      <edge id="3478" label="Q9D6R2 (pp) Q8K3J1" source="654" target="486" cy:directed="1"/>
      <edge id="3477" label="Q9D6R2 (pp) Q60597" source="654" target="379" cy:directed="1"/>
      <edge id="3476" label="Q9D6R2 (pp) P54071" source="654" target="653" cy:directed="1"/>
      <edge id="3475" label="Q9D6R2 (pp) Q9D2G2" source="654" target="603" cy:directed="1"/>
      <edge id="3474" label="Q9D6R2 (pp) Q9WUM5" source="654" target="614" cy:directed="1"/>
      <edge id="3473" label="P54071 (pp) P06151" source="653" target="652" cy:directed="1"/>
      <edge id="3472" label="P54071 (pp) Q60597" source="653" target="379" cy:directed="1"/>
      <edge id="3471" label="P54071 (pp) P70404" source="653" target="596" cy:directed="1"/>
      <edge id="3470" label="Q9DB20 (pp) Q9CQH3" source="651" target="650" cy:directed="1"/>
      <edge id="3469" label="Q9DB20 (pp) P67778" source="651" target="629" cy:directed="1"/>
      <edge id="3468" label="Q9DB20 (pp) Q9DCX2" source="651" target="524" cy:directed="1"/>
      <edge id="3467" label="Q9DB20 (pp) O09111" source="651" target="679" cy:directed="1"/>
      <edge id="3466" label="Q9DB20 (pp) Q9D6J5" source="651" target="403" cy:directed="1"/>
      <edge id="3465" label="Q9DB20 (pp) Q99LX0" source="651" target="573" cy:directed="1"/>
      <edge id="3464" label="Q9DB20 (pp) Q9DCJ5" source="651" target="510" cy:directed="1"/>
      <edge id="3463" label="Q9DB20 (pp) Q9CPP6" source="651" target="609" cy:directed="1"/>
      <edge id="3462" label="Q9DB20 (pp) P99029" source="651" target="534" cy:directed="1"/>
      <edge id="3461" label="Q9DB20 (pp) Q9CQ69" source="651" target="656" cy:directed="1"/>
      <edge id="3460" label="Q9DB20 (pp) Q9CR68" source="651" target="623" cy:directed="1"/>
      <edge id="3459" label="Q9DB20 (pp) P97807" source="651" target="550" cy:directed="1"/>
      <edge id="3458" label="Q9DB20 (pp) Q9CZ13" source="651" target="641" cy:directed="1"/>
      <edge id="3457" label="Q9DB20 (pp) Q9D6J6" source="651" target="683" cy:directed="1"/>
      <edge id="3456" label="Q9DB20 (pp) P19783" source="651" target="645" cy:directed="1"/>
      <edge id="3455" label="Q9DB20 (pp) P56391" source="651" target="559" cy:directed="1"/>
      <edge id="3454" label="Q9DB20 (pp) Q3UIU2" source="651" target="602" cy:directed="1"/>
      <edge id="3453" label="Q9DB20 (pp) Q9DC69" source="651" target="483" cy:directed="1"/>
      <edge id="3452" label="Q9DB20 (pp) Q9CQQ7" source="651" target="481" cy:directed="1"/>
      <edge id="3451" label="Q9DB20 (pp) P62073" source="651" target="535" cy:directed="1"/>
      <edge id="3450" label="Q9DB20 (pp) Q9ERS2" source="651" target="551" cy:directed="1"/>
      <edge id="3449" label="Q9DB20 (pp) Q9D3D9" source="651" target="680" cy:directed="1"/>
      <edge id="3448" label="Q9DB20 (pp) Q91YT0" source="651" target="511" cy:directed="1"/>
      <edge id="3447" label="Q9DB20 (pp) Q9WUM5" source="651" target="614" cy:directed="1"/>
      <edge id="3446" label="Q9DB20 (pp) P17751" source="651" target="593" cy:directed="1"/>
      <edge id="3445" label="Q9DB20 (pp) Q78IK2" source="651" target="135" cy:directed="1"/>
      <edge id="3444" label="Q9DB20 (pp) Q8K3J1" source="651" target="486" cy:directed="1"/>
      <edge id="3443" label="Q9DB20 (pp) Q06185" source="651" target="619" cy:directed="1"/>
      <edge id="3442" label="Q9DB20 (pp) Q91VM9" source="651" target="484" cy:directed="1"/>
      <edge id="3441" label="Q9DB20 (pp) Q9DCS9" source="651" target="624" cy:directed="1"/>
      <edge id="3440" label="Q9DB20 (pp) P43024" source="651" target="418" cy:directed="1"/>
      <edge id="3439" label="Q9DB20 (pp) P56480" source="651" target="632" cy:directed="1"/>
      <edge id="3438" label="Q9DB20 (pp) Q03265" source="651" target="678" cy:directed="1"/>
      <edge id="3437" label="Q9DB20 (pp) Q9Z1P6" source="651" target="591" cy:directed="1"/>
      <edge id="3436" label="Q9DB20 (pp) Q9CPQ8" source="651" target="626" cy:directed="1"/>
      <edge id="3435" label="Q9DB20 (pp) Q91VR2" source="651" target="627" cy:directed="1"/>
      <edge id="3434" label="Q9DB20 (pp) Q9DB77" source="651" target="485" cy:directed="1"/>
      <edge id="3433" label="Q9CQH3 (pp) Q9D6J6" source="650" target="683" cy:directed="1"/>
      <edge id="3432" label="Q3UHD9 (pp) Q9Z2H5" source="649" target="648" cy:directed="1"/>
      <edge id="3431" label="Q9Z2H5 (pp) Q99N28" source="648" target="518" cy:directed="1"/>
      <edge id="3430" label="Q6P9K8 (pp) O88952" source="647" target="646" cy:directed="1"/>
      <edge id="3429" label="Q6P9K8 (pp) O70589" source="647" target="326" cy:directed="1"/>
      <edge id="3428" label="O88952 (pp) P60469" source="646" target="277" cy:directed="1"/>
      <edge id="3427" label="O88952 (pp) O70589" source="646" target="326" cy:directed="1"/>
      <edge id="3426" label="P19783 (pp) Q9CQH3" source="645" target="650" cy:directed="1"/>
      <edge id="3425" label="P19783 (pp) Q9CQ69" source="645" target="656" cy:directed="1"/>
      <edge id="3424" label="P19783 (pp) Q9CR68" source="645" target="623" cy:directed="1"/>
      <edge id="3423" label="P19783 (pp) P19536" source="645" target="517" cy:directed="1"/>
      <edge id="3422" label="P19783 (pp) Q9D3D9" source="645" target="680" cy:directed="1"/>
      <edge id="3421" label="P19783 (pp) Q91YT0" source="645" target="511" cy:directed="1"/>
      <edge id="3420" label="P19783 (pp) Q06185" source="645" target="619" cy:directed="1"/>
      <edge id="3419" label="P19783 (pp) Q91VR2" source="645" target="627" cy:directed="1"/>
      <edge id="3418" label="P19783 (pp) Q9ERS2" source="645" target="551" cy:directed="1"/>
      <edge id="3417" label="P19783 (pp) P17665" source="645" target="335" cy:directed="1"/>
      <edge id="3416" label="P19783 (pp) Q9DCX2" source="645" target="524" cy:directed="1"/>
      <edge id="3415" label="P19783 (pp) Q99LX0" source="645" target="573" cy:directed="1"/>
      <edge id="3414" label="P19783 (pp) Q9CQQ7" source="645" target="481" cy:directed="1"/>
      <edge id="3413" label="P19783 (pp) P56391" source="645" target="559" cy:directed="1"/>
      <edge id="3412" label="P19783 (pp) P43024" source="645" target="418" cy:directed="1"/>
      <edge id="3411" label="P19783 (pp) P00405" source="645" target="221" cy:directed="1"/>
      <edge id="3410" label="P19783 (pp) Q9DCJ5" source="645" target="510" cy:directed="1"/>
      <edge id="3409" label="P19783 (pp) P48771" source="645" target="587" cy:directed="1"/>
      <edge id="3408" label="P19783 (pp) Q9DC69" source="645" target="483" cy:directed="1"/>
      <edge id="3407" label="Q8BK64 (pp) P63038" source="644" target="643" cy:directed="1"/>
      <edge id="3406" label="Q8BK64 (pp) Q60864" source="644" target="516" cy:directed="1"/>
      <edge id="3405" label="Q8BK64 (pp) P07901" source="644" target="382" cy:directed="1"/>
      <edge id="3404" label="Q8BK64 (pp) Q61699" source="644" target="172" cy:directed="1"/>
      <edge id="3403" label="Q8BK64 (pp) P11499" source="644" target="570" cy:directed="1"/>
      <edge id="3402" label="P63038 (pp) P52196" source="643" target="622" cy:directed="1"/>
      <edge id="3401" label="P63038 (pp) P09411" source="643" target="592" cy:directed="1"/>
      <edge id="3400" label="P63038 (pp) Q99LC5" source="643" target="575" cy:directed="1"/>
      <edge id="3399" label="P63038 (pp) P52480" source="643" target="435" cy:directed="1"/>
      <edge id="3398" label="P63038 (pp) P15105" source="643" target="608" cy:directed="1"/>
      <edge id="3397" label="P63038 (pp) Q9WUM5" source="643" target="614" cy:directed="1"/>
      <edge id="3396" label="P63038 (pp) Q9Z0X1" source="643" target="340" cy:directed="1"/>
      <edge id="3395" label="P63038 (pp) Q6PB66" source="643" target="392" cy:directed="1"/>
      <edge id="3394" label="P63038 (pp) Q8BIJ6" source="643" target="163" cy:directed="1"/>
      <edge id="3393" label="P63038 (pp) P63037" source="643" target="611" cy:directed="1"/>
      <edge id="3392" label="P63038 (pp) Q925I1" source="643" target="301" cy:directed="1"/>
      <edge id="3391" label="P63038 (pp) Q8CGK3" source="643" target="132" cy:directed="1"/>
      <edge id="3390" label="P63038 (pp) Q921G7" source="643" target="580" cy:directed="1"/>
      <edge id="3389" label="P63038 (pp) Q91VR2" source="643" target="627" cy:directed="1"/>
      <edge id="3388" label="P63038 (pp) Q61699" source="643" target="172" cy:directed="1"/>
      <edge id="3387" label="P63038 (pp) P17156" source="643" target="312" cy:directed="1"/>
      <edge id="3386" label="P63038 (pp) O35658" source="643" target="526" cy:directed="1"/>
      <edge id="3385" label="P63038 (pp) P67778" source="643" target="629" cy:directed="1"/>
      <edge id="3384" label="P63038 (pp) P97807" source="643" target="550" cy:directed="1"/>
      <edge id="3383" label="Q8BH95 (pp) Q9CZ13" source="642" target="641" cy:directed="1"/>
      <edge id="3382" label="Q8BH95 (pp) Q8BWT1" source="642" target="579" cy:directed="1"/>
      <edge id="3381" label="Q8BH95 (pp) Q8QZT1" source="642" target="333" cy:directed="1"/>
      <edge id="3380" label="Q8BH95 (pp) P51174" source="642" target="498" cy:directed="1"/>
      <edge id="3379" label="Q8BH95 (pp) P50544" source="642" target="431" cy:directed="1"/>
      <edge id="3378" label="Q8BH95 (pp) Q9JHI5" source="642" target="437" cy:directed="1"/>
      <edge id="3377" label="Q8BH95 (pp) Q8BMS1" source="642" target="374" cy:directed="1"/>
      <edge id="3376" label="Q8BH95 (pp) Q99MN9" source="642" target="456" cy:directed="1"/>
      <edge id="3375" label="Q8BH95 (pp) O08756" source="642" target="507" cy:directed="1"/>
      <edge id="3374" label="Q8BH95 (pp) Q61425" source="642" target="576" cy:directed="1"/>
      <edge id="3373" label="Q8BH95 (pp) Q99JY0" source="642" target="506" cy:directed="1"/>
      <edge id="3372" label="Q8BH95 (pp) Q99MR8" source="642" target="265" cy:directed="1"/>
      <edge id="3371" label="Q8BH95 (pp) Q9DCJ5" source="642" target="510" cy:directed="1"/>
      <edge id="3370" label="Q8BH95 (pp) Q9WUM5" source="642" target="614" cy:directed="1"/>
      <edge id="3369" label="Q8BH95 (pp) Q9CQ62" source="642" target="605" cy:directed="1"/>
      <edge id="3368" label="Q8BH95 (pp) Q99LC5" source="642" target="575" cy:directed="1"/>
      <edge id="3367" label="Q8BH95 (pp) Q9DC69" source="642" target="483" cy:directed="1"/>
      <edge id="3366" label="Q8BH95 (pp) Q9DBL1" source="642" target="439" cy:directed="1"/>
      <edge id="3365" label="Q9CZ13 (pp) Q9ERS2" source="641" target="551" cy:directed="1"/>
      <edge id="3364" label="Q9CZ13 (pp) Q9DCS9" source="641" target="624" cy:directed="1"/>
      <edge id="3363" label="Q9CZ13 (pp) P97807" source="641" target="550" cy:directed="1"/>
      <edge id="3362" label="Q9CZ13 (pp) P67778" source="641" target="629" cy:directed="1"/>
      <edge id="3361" label="Q9CZ13 (pp) Q91VD9" source="641" target="625" cy:directed="1"/>
      <edge id="3360" label="Q9CZ13 (pp) Q9D3D9" source="641" target="680" cy:directed="1"/>
      <edge id="3359" label="Q9CZ13 (pp) Q91YT0" source="641" target="511" cy:directed="1"/>
      <edge id="3358" label="Q9CZ13 (pp) O09111" source="641" target="679" cy:directed="1"/>
      <edge id="3357" label="Q9CZ13 (pp) Q8K1Z0" source="641" target="571" cy:directed="1"/>
      <edge id="3356" label="Q9CZ13 (pp) Q60597" source="641" target="379" cy:directed="1"/>
      <edge id="3355" label="Q9CZ13 (pp) Q9CQ69" source="641" target="656" cy:directed="1"/>
      <edge id="3354" label="Q9CZ13 (pp) Q9DCJ5" source="641" target="510" cy:directed="1"/>
      <edge id="3353" label="Q9CZ13 (pp) Q9Z1P6" source="641" target="591" cy:directed="1"/>
      <edge id="3352" label="Q9CZ13 (pp) Q9WUM5" source="641" target="614" cy:directed="1"/>
      <edge id="3351" label="Q9CZ13 (pp) P19783" source="641" target="645" cy:directed="1"/>
      <edge id="3350" label="Q9CZ13 (pp) Q9D6J6" source="641" target="683" cy:directed="1"/>
      <edge id="3349" label="Q9CZ13 (pp) Q91VR2" source="641" target="627" cy:directed="1"/>
      <edge id="3348" label="Q9CZ13 (pp) Q8K3J1" source="641" target="486" cy:directed="1"/>
      <edge id="3347" label="Q9CZ13 (pp) Q9CQH3" source="641" target="650" cy:directed="1"/>
      <edge id="3346" label="Q9CZ13 (pp) Q99P72" source="641" target="212" cy:directed="1"/>
      <edge id="3345" label="Q9CZ13 (pp) Q9DC69" source="641" target="483" cy:directed="1"/>
      <edge id="3344" label="Q9CZ13 (pp) Q9DB77" source="641" target="485" cy:directed="1"/>
      <edge id="3343" label="Q9CZ13 (pp) Q9CR68" source="641" target="623" cy:directed="1"/>
      <edge id="3342" label="Q9CZ13 (pp) Q99LY9" source="641" target="638" cy:directed="1"/>
      <edge id="3341" label="Q9D0M3 (pp) Q9DB20" source="640" target="651" cy:directed="1"/>
      <edge id="3340" label="Q9D0M3 (pp) P62897" source="640" target="604" cy:directed="1"/>
      <edge id="3339" label="Q9D0M3 (pp) P70404" source="640" target="596" cy:directed="1"/>
      <edge id="3338" label="Q9D0M3 (pp) O09111" source="640" target="679" cy:directed="1"/>
      <edge id="3337" label="Q9D0M3 (pp) P97807" source="640" target="550" cy:directed="1"/>
      <edge id="3336" label="Q9D0M3 (pp) Q9D3D9" source="640" target="680" cy:directed="1"/>
      <edge id="3335" label="Q9D0M3 (pp) Q9ERS2" source="640" target="551" cy:directed="1"/>
      <edge id="3334" label="Q9D0M3 (pp) Q9CQZ6" source="640" target="659" cy:directed="1"/>
      <edge id="3333" label="Q9D0M3 (pp) Q9CQ69" source="640" target="656" cy:directed="1"/>
      <edge id="3332" label="Q9D0M3 (pp) P97450" source="640" target="460" cy:directed="1"/>
      <edge id="3331" label="Q9D0M3 (pp) Q06185" source="640" target="619" cy:directed="1"/>
      <edge id="3330" label="Q9D0M3 (pp) Q9WUM5" source="640" target="614" cy:directed="1"/>
      <edge id="3329" label="Q9D0M3 (pp) Q91VD9" source="640" target="625" cy:directed="1"/>
      <edge id="3328" label="Q9D0M3 (pp) P17751" source="640" target="593" cy:directed="1"/>
      <edge id="3327" label="Q9D0M3 (pp) Q9DB77" source="640" target="485" cy:directed="1"/>
      <edge id="3326" label="Q9D0M3 (pp) P19536" source="640" target="517" cy:directed="1"/>
      <edge id="3325" label="Q9D0M3 (pp) Q91VR2" source="640" target="627" cy:directed="1"/>
      <edge id="3324" label="Q9D0M3 (pp) P50516" source="640" target="597" cy:directed="1"/>
      <edge id="3323" label="Q9D0M3 (pp) Q9DCX2" source="640" target="524" cy:directed="1"/>
      <edge id="3322" label="Q9D0M3 (pp) Q9CR68" source="640" target="623" cy:directed="1"/>
      <edge id="3321" label="Q9D0M3 (pp) Q91YT0" source="640" target="511" cy:directed="1"/>
      <edge id="3320" label="Q9D0M3 (pp) Q9D6J6" source="640" target="683" cy:directed="1"/>
      <edge id="3319" label="Q9D0M3 (pp) P62073" source="640" target="535" cy:directed="1"/>
      <edge id="3318" label="Q9D0M3 (pp) Q8K3J1" source="640" target="486" cy:directed="1"/>
      <edge id="3317" label="Q9D0M3 (pp) Q64521" source="640" target="465" cy:directed="1"/>
      <edge id="3316" label="Q9D0M3 (pp) P56391" source="640" target="559" cy:directed="1"/>
      <edge id="3315" label="Q9D0M3 (pp) Q8VEM8" source="640" target="541" cy:directed="1"/>
      <edge id="3314" label="Q9D0M3 (pp) P42125" source="640" target="371" cy:directed="1"/>
      <edge id="3313" label="Q9D0M3 (pp) Q99LC3" source="640" target="639" cy:directed="1"/>
      <edge id="3312" label="Q9D0M3 (pp) Q99LX0" source="640" target="573" cy:directed="1"/>
      <edge id="3311" label="Q9D0M3 (pp) P43024" source="640" target="418" cy:directed="1"/>
      <edge id="3310" label="Q9D0M3 (pp) Q9DC69" source="640" target="483" cy:directed="1"/>
      <edge id="3309" label="Q9D0M3 (pp) Q9CQQ7" source="640" target="481" cy:directed="1"/>
      <edge id="3308" label="Q9D0M3 (pp) Q9D2G2" source="640" target="603" cy:directed="1"/>
      <edge id="3307" label="Q9D0M3 (pp) Q9DCJ5" source="640" target="510" cy:directed="1"/>
      <edge id="3306" label="Q9D0M3 (pp) P48771" source="640" target="587" cy:directed="1"/>
      <edge id="3305" label="Q9D0M3 (pp) Q9CZ13" source="640" target="641" cy:directed="1"/>
      <edge id="3304" label="Q9D0M3 (pp) Q9CQH3" source="640" target="650" cy:directed="1"/>
      <edge id="3303" label="Q9D0M3 (pp) Q9Z1P6" source="640" target="591" cy:directed="1"/>
      <edge id="3302" label="Q9D0M3 (pp) P00405" source="640" target="221" cy:directed="1"/>
      <edge id="3301" label="Q9D0M3 (pp) P19783" source="640" target="645" cy:directed="1"/>
      <edge id="3300" label="Q9D0M3 (pp) Q9CPP6" source="640" target="609" cy:directed="1"/>
      <edge id="3299" label="Q9D0M3 (pp) Q03265" source="640" target="678" cy:directed="1"/>
      <edge id="3298" label="Q9D0M3 (pp) O35658" source="640" target="526" cy:directed="1"/>
      <edge id="3297" label="Q9D0M3 (pp) P56480" source="640" target="632" cy:directed="1"/>
      <edge id="3296" label="Q99LC3 (pp) Q99LY9" source="639" target="638" cy:directed="1"/>
      <edge id="3295" label="Q99LC3 (pp) Q9Z1P6" source="639" target="591" cy:directed="1"/>
      <edge id="3294" label="Q99LC3 (pp) Q9DCJ5" source="639" target="510" cy:directed="1"/>
      <edge id="3293" label="Q99LC3 (pp) P50516" source="639" target="597" cy:directed="1"/>
      <edge id="3292" label="Q99LC3 (pp) O09111" source="639" target="679" cy:directed="1"/>
      <edge id="3291" label="Q99LC3 (pp) Q9D6J6" source="639" target="683" cy:directed="1"/>
      <edge id="3290" label="Q99LC3 (pp) Q9CQH3" source="639" target="650" cy:directed="1"/>
      <edge id="3289" label="Q99LC3 (pp) Q9DB77" source="639" target="485" cy:directed="1"/>
      <edge id="3288" label="Q99LC3 (pp) Q91YT0" source="639" target="511" cy:directed="1"/>
      <edge id="3287" label="Q99LC3 (pp) Q9CQ54" source="639" target="658" cy:directed="1"/>
      <edge id="3286" label="Q99LC3 (pp) Q9DCS9" source="639" target="624" cy:directed="1"/>
      <edge id="3285" label="Q99LC3 (pp) Q9CQ69" source="639" target="656" cy:directed="1"/>
      <edge id="3284" label="Q99LC3 (pp) Q9DC69" source="639" target="483" cy:directed="1"/>
      <edge id="3283" label="Q99LC3 (pp) Q9D3D9" source="639" target="680" cy:directed="1"/>
      <edge id="3282" label="Q99LC3 (pp) Q8K3J1" source="639" target="486" cy:directed="1"/>
      <edge id="3281" label="Q99LY9 (pp) Q9ERS2" source="638" target="551" cy:directed="1"/>
      <edge id="3280" label="Q99LY9 (pp) Q9CQH3" source="638" target="650" cy:directed="1"/>
      <edge id="3279" label="Q99LY9 (pp) Q9D6J6" source="638" target="683" cy:directed="1"/>
      <edge id="3278" label="Q8BMF4 (pp) Q05920" source="637" target="636" cy:directed="1"/>
      <edge id="3277" label="Q8BMF4 (pp) Q8BWT1" source="637" target="579" cy:directed="1"/>
      <edge id="3276" label="Q8BMF4 (pp) Q9D2G2" source="637" target="603" cy:directed="1"/>
      <edge id="3275" label="Q8BMF4 (pp) P63101" source="637" target="411" cy:directed="1"/>
      <edge id="3274" label="Q8BMF4 (pp) Q9WUM5" source="637" target="614" cy:directed="1"/>
      <edge id="3273" label="Q8BMF4 (pp) Q99JY0" source="637" target="506" cy:directed="1"/>
      <edge id="3272" label="Q8BMF4 (pp) Q922H2" source="637" target="199" cy:directed="1"/>
      <edge id="3271" label="Q05920 (pp) P06151" source="636" target="652" cy:directed="1"/>
      <edge id="3270" label="Q05920 (pp) P15105" source="636" target="608" cy:directed="1"/>
      <edge id="3269" label="P63085 (pp) P35438" source="635" target="675" cy:directed="1"/>
      <edge id="3268" label="P63085 (pp) Q64010" source="635" target="461" cy:directed="1"/>
      <edge id="3267" label="P63085 (pp) P07901" source="635" target="382" cy:directed="1"/>
      <edge id="3266" label="P61027 (pp) Q61598" source="634" target="633" cy:directed="1"/>
      <edge id="3265" label="Q61598 (pp) Q91VR2" source="633" target="627" cy:directed="1"/>
      <edge id="3264" label="Q61598 (pp) P63011" source="633" target="343" cy:directed="1"/>
      <edge id="3263" label="Q61598 (pp) Q99PT1" source="633" target="457" cy:directed="1"/>
      <edge id="3262" label="Q61598 (pp) P62821" source="633" target="242" cy:directed="1"/>
      <edge id="3261" label="P56480 (pp) P17742" source="632" target="631" cy:directed="1"/>
      <edge id="3260" label="P56480 (pp) Q9D2G2" source="632" target="603" cy:directed="1"/>
      <edge id="3259" label="P56480 (pp) P63038" source="632" target="643" cy:directed="1"/>
      <edge id="3258" label="P56480 (pp) P50516" source="632" target="597" cy:directed="1"/>
      <edge id="3257" label="P56480 (pp) P09103" source="632" target="416" cy:directed="1"/>
      <edge id="3256" label="P56480 (pp) Q9D3D9" source="632" target="680" cy:directed="1"/>
      <edge id="3255" label="P56480 (pp) Q60864" source="632" target="516" cy:directed="1"/>
      <edge id="3254" label="P56480 (pp) P03930" source="632" target="502" cy:directed="1"/>
      <edge id="3253" label="P56480 (pp) Q06185" source="632" target="619" cy:directed="1"/>
      <edge id="3252" label="P56480 (pp) Q99LX0" source="632" target="573" cy:directed="1"/>
      <edge id="3251" label="P56480 (pp) Q9WUM5" source="632" target="614" cy:directed="1"/>
      <edge id="3250" label="P56480 (pp) P17156" source="632" target="312" cy:directed="1"/>
      <edge id="3249" label="P56480 (pp) Q9CZ13" source="632" target="641" cy:directed="1"/>
      <edge id="3248" label="P56480 (pp) P19783" source="632" target="645" cy:directed="1"/>
      <edge id="3247" label="P56480 (pp) P62259" source="632" target="665" cy:directed="1"/>
      <edge id="3246" label="P56480 (pp) P00405" source="632" target="221" cy:directed="1"/>
      <edge id="3245" label="P56480 (pp) P56391" source="632" target="559" cy:directed="1"/>
      <edge id="3244" label="P56480 (pp) P15105" source="632" target="608" cy:directed="1"/>
      <edge id="3243" label="P56480 (pp) O35143" source="632" target="187" cy:directed="1"/>
      <edge id="3242" label="P56480 (pp) Q99LC3" source="632" target="639" cy:directed="1"/>
      <edge id="3241" label="P56480 (pp) Q8K3J1" source="632" target="486" cy:directed="1"/>
      <edge id="3240" label="P56480 (pp) P17182" source="632" target="375" cy:directed="1"/>
      <edge id="3239" label="P56480 (pp) Q9DCX2" source="632" target="524" cy:directed="1"/>
      <edge id="3238" label="P56480 (pp) Q8VEM8" source="632" target="541" cy:directed="1"/>
      <edge id="3237" label="P56480 (pp) Q91VR2" source="632" target="627" cy:directed="1"/>
      <edge id="3236" label="P56480 (pp) P16054" source="632" target="447" cy:directed="1"/>
      <edge id="3235" label="P56480 (pp) Q91VD9" source="632" target="625" cy:directed="1"/>
      <edge id="3234" label="P56480 (pp) Q9D6J6" source="632" target="683" cy:directed="1"/>
      <edge id="3233" label="P56480 (pp) Q9CQQ7" source="632" target="481" cy:directed="1"/>
      <edge id="3232" label="P56480 (pp) Q91YT0" source="632" target="511" cy:directed="1"/>
      <edge id="3231" label="P56480 (pp) Q9CR68" source="632" target="623" cy:directed="1"/>
      <edge id="3230" label="P56480 (pp) P97807" source="632" target="550" cy:directed="1"/>
      <edge id="3229" label="P56480 (pp) Q03265" source="632" target="678" cy:directed="1"/>
      <edge id="3228" label="P68404 (pp) P35438" source="630" target="675" cy:directed="1"/>
      <edge id="3227" label="P68404 (pp) P26645" source="630" target="185" cy:directed="1"/>
      <edge id="3226" label="P67778 (pp) P50516" source="629" target="597" cy:directed="1"/>
      <edge id="3225" label="Q9JLJ2 (pp) Q91VR2" source="628" target="627" cy:directed="1"/>
      <edge id="3224" label="Q9JLJ2 (pp) Q9EQ20" source="628" target="528" cy:directed="1"/>
      <edge id="3223" label="Q9JLJ2 (pp) Q61425" source="628" target="576" cy:directed="1"/>
      <edge id="3222" label="Q9JLJ2 (pp) Q8CHT0" source="628" target="388" cy:directed="1"/>
      <edge id="3221" label="Q9JLJ2 (pp) Q8BW75" source="628" target="217" cy:directed="1"/>
      <edge id="3220" label="Q9JLJ2 (pp) P61922" source="628" target="566" cy:directed="1"/>
      <edge id="3219" label="Q91VR2 (pp) O09111" source="627" target="679" cy:directed="1"/>
      <edge id="3218" label="Q91VR2 (pp) Q9CQH3" source="627" target="650" cy:directed="1"/>
      <edge id="3217" label="Q91VR2 (pp) Q9D6J6" source="627" target="683" cy:directed="1"/>
      <edge id="3216" label="Q9CPQ8 (pp) Q9CQH3" source="626" target="650" cy:directed="1"/>
      <edge id="3215" label="Q9CPQ8 (pp) Q9D6J6" source="626" target="683" cy:directed="1"/>
      <edge id="3214" label="Q91VD9 (pp) Q9ERS2" source="625" target="551" cy:directed="1"/>
      <edge id="3213" label="Q91VD9 (pp) Q9DC69" source="625" target="483" cy:directed="1"/>
      <edge id="3212" label="Q91VD9 (pp) Q91YT0" source="625" target="511" cy:directed="1"/>
      <edge id="3211" label="Q91VD9 (pp) Q99LY9" source="625" target="638" cy:directed="1"/>
      <edge id="3210" label="Q91VD9 (pp) Q3UIU2" source="625" target="602" cy:directed="1"/>
      <edge id="3209" label="Q91VD9 (pp) Q99LC5" source="625" target="575" cy:directed="1"/>
      <edge id="3208" label="Q91VD9 (pp) Q8K3J1" source="625" target="486" cy:directed="1"/>
      <edge id="3207" label="Q91VD9 (pp) Q9Z1P6" source="625" target="591" cy:directed="1"/>
      <edge id="3206" label="Q91VD9 (pp) Q8BMF4" source="625" target="637" cy:directed="1"/>
      <edge id="3205" label="Q91VD9 (pp) Q9DCJ5" source="625" target="510" cy:directed="1"/>
      <edge id="3204" label="Q91VD9 (pp) Q9CQ54" source="625" target="658" cy:directed="1"/>
      <edge id="3203" label="Q91VD9 (pp) Q9CQQ7" source="625" target="481" cy:directed="1"/>
      <edge id="3202" label="Q91VD9 (pp) P97807" source="625" target="550" cy:directed="1"/>
      <edge id="3201" label="Q91VD9 (pp) Q9DB77" source="625" target="485" cy:directed="1"/>
      <edge id="3200" label="Q91VD9 (pp) Q99LC3" source="625" target="639" cy:directed="1"/>
      <edge id="3199" label="Q91VD9 (pp) Q6PB66" source="625" target="392" cy:directed="1"/>
      <edge id="3198" label="Q91VD9 (pp) Q9DCS9" source="625" target="624" cy:directed="1"/>
      <edge id="3197" label="Q91VD9 (pp) Q9WUM5" source="625" target="614" cy:directed="1"/>
      <edge id="3196" label="Q91VD9 (pp) Q9CR68" source="625" target="623" cy:directed="1"/>
      <edge id="3195" label="Q91VD9 (pp) Q9CQH3" source="625" target="650" cy:directed="1"/>
      <edge id="3194" label="Q91VD9 (pp) Q91VR2" source="625" target="627" cy:directed="1"/>
      <edge id="3193" label="Q91VD9 (pp) Q9CQ69" source="625" target="656" cy:directed="1"/>
      <edge id="3192" label="Q91VD9 (pp) O09111" source="625" target="679" cy:directed="1"/>
      <edge id="3191" label="Q91VD9 (pp) Q9D2G2" source="625" target="603" cy:directed="1"/>
      <edge id="3190" label="Q91VD9 (pp) Q9CQZ6" source="625" target="659" cy:directed="1"/>
      <edge id="3189" label="Q91VD9 (pp) Q9D6J6" source="625" target="683" cy:directed="1"/>
      <edge id="3188" label="Q9DCS9 (pp) Q9CR68" source="624" target="623" cy:directed="1"/>
      <edge id="3187" label="Q9DCS9 (pp) Q9DC69" source="624" target="483" cy:directed="1"/>
      <edge id="3186" label="Q9DCS9 (pp) Q9CQQ7" source="624" target="481" cy:directed="1"/>
      <edge id="3185" label="Q9DCS9 (pp) Q06185" source="624" target="619" cy:directed="1"/>
      <edge id="3184" label="Q9DCS9 (pp) Q9CPQ8" source="624" target="626" cy:directed="1"/>
      <edge id="3183" label="Q9DCS9 (pp) Q9D3D9" source="624" target="680" cy:directed="1"/>
      <edge id="3182" label="Q9DCS9 (pp) Q9DCX2" source="624" target="524" cy:directed="1"/>
      <edge id="3181" label="Q9DCS9 (pp) Q9D6J6" source="624" target="683" cy:directed="1"/>
      <edge id="3180" label="Q9DCS9 (pp) Q9ERS2" source="624" target="551" cy:directed="1"/>
      <edge id="3179" label="Q9DCS9 (pp) Q9CQ69" source="624" target="656" cy:directed="1"/>
      <edge id="3178" label="Q9DCS9 (pp) Q8K3J1" source="624" target="486" cy:directed="1"/>
      <edge id="3177" label="Q9DCS9 (pp) Q9DCJ5" source="624" target="510" cy:directed="1"/>
      <edge id="3176" label="Q9DCS9 (pp) Q9CQH3" source="624" target="650" cy:directed="1"/>
      <edge id="3175" label="Q9DCS9 (pp) O09111" source="624" target="679" cy:directed="1"/>
      <edge id="3174" label="Q9CR68 (pp) P43024" source="623" target="418" cy:directed="1"/>
      <edge id="3173" label="Q9CR68 (pp) Q9D2G2" source="623" target="603" cy:directed="1"/>
      <edge id="3172" label="Q9CR68 (pp) Q06185" source="623" target="619" cy:directed="1"/>
      <edge id="3171" label="Q9CR68 (pp) Q9CQQ7" source="623" target="481" cy:directed="1"/>
      <edge id="3170" label="Q9CR68 (pp) Q8K3J1" source="623" target="486" cy:directed="1"/>
      <edge id="3169" label="Q9CR68 (pp) Q9DCJ5" source="623" target="510" cy:directed="1"/>
      <edge id="3168" label="Q9CR68 (pp) Q9WUM5" source="623" target="614" cy:directed="1"/>
      <edge id="3167" label="Q9CR68 (pp) Q9ERS2" source="623" target="551" cy:directed="1"/>
      <edge id="3166" label="Q9CR68 (pp) Q9D3D9" source="623" target="680" cy:directed="1"/>
      <edge id="3165" label="Q9CR68 (pp) P00405" source="623" target="221" cy:directed="1"/>
      <edge id="3164" label="Q9CR68 (pp) P56391" source="623" target="559" cy:directed="1"/>
      <edge id="3163" label="Q9CR68 (pp) Q9CQ69" source="623" target="656" cy:directed="1"/>
      <edge id="3162" label="Q9CR68 (pp) O88441" source="623" target="595" cy:directed="1"/>
      <edge id="3161" label="Q9CR68 (pp) P62897" source="623" target="604" cy:directed="1"/>
      <edge id="3160" label="Q9CR68 (pp) Q9D6J6" source="623" target="683" cy:directed="1"/>
      <edge id="3159" label="Q9CR68 (pp) Q9DC69" source="623" target="483" cy:directed="1"/>
      <edge id="3158" label="Q9CR68 (pp) O09111" source="623" target="679" cy:directed="1"/>
      <edge id="3157" label="Q9CR68 (pp) Q9DCX2" source="623" target="524" cy:directed="1"/>
      <edge id="3156" label="Q9CR68 (pp) Q8VEM8" source="623" target="541" cy:directed="1"/>
      <edge id="3155" label="Q9CR68 (pp) Q91VR2" source="623" target="627" cy:directed="1"/>
      <edge id="3154" label="Q9CR68 (pp) Q9CQH3" source="623" target="650" cy:directed="1"/>
      <edge id="3153" label="Q9CR68 (pp) O35658" source="623" target="526" cy:directed="1"/>
      <edge id="3152" label="P05132 (pp) P12367" source="621" target="473" cy:directed="1"/>
      <edge id="3151" label="P05132 (pp) P31324" source="621" target="391" cy:directed="1"/>
      <edge id="3150" label="P05132 (pp) P35438" source="621" target="675" cy:directed="1"/>
      <edge id="3149" label="Q9CQJ8 (pp) Q06185" source="620" target="619" cy:directed="1"/>
      <edge id="3148" label="Q9CQJ8 (pp) P19783" source="620" target="645" cy:directed="1"/>
      <edge id="3147" label="Q9CQJ8 (pp) Q9DB77" source="620" target="485" cy:directed="1"/>
      <edge id="3146" label="Q9CQJ8 (pp) Q9Z1P6" source="620" target="591" cy:directed="1"/>
      <edge id="3145" label="Q9CQJ8 (pp) Q9DC69" source="620" target="483" cy:directed="1"/>
      <edge id="3144" label="Q9CQJ8 (pp) O09111" source="620" target="679" cy:directed="1"/>
      <edge id="3143" label="Q9CQJ8 (pp) Q9DB20" source="620" target="651" cy:directed="1"/>
      <edge id="3142" label="Q9CQJ8 (pp) Q9CQ69" source="620" target="656" cy:directed="1"/>
      <edge id="3141" label="Q9CQJ8 (pp) Q9DCJ5" source="620" target="510" cy:directed="1"/>
      <edge id="3140" label="Q9CQJ8 (pp) P48771" source="620" target="587" cy:directed="1"/>
      <edge id="3139" label="Q9CQJ8 (pp) Q9D0M3" source="620" target="640" cy:directed="1"/>
      <edge id="3138" label="Q9CQJ8 (pp) Q9D6J6" source="620" target="683" cy:directed="1"/>
      <edge id="3137" label="Q9CQJ8 (pp) Q9CQ54" source="620" target="658" cy:directed="1"/>
      <edge id="3136" label="Q9CQJ8 (pp) P97450" source="620" target="460" cy:directed="1"/>
      <edge id="3135" label="Q9CQJ8 (pp) Q9CZ13" source="620" target="641" cy:directed="1"/>
      <edge id="3134" label="Q9CQJ8 (pp) P97807" source="620" target="550" cy:directed="1"/>
      <edge id="3133" label="Q9CQJ8 (pp) Q9D023" source="620" target="474" cy:directed="1"/>
      <edge id="3132" label="Q9CQJ8 (pp) Q9CQZ6" source="620" target="659" cy:directed="1"/>
      <edge id="3131" label="Q9CQJ8 (pp) Q9ERS2" source="620" target="551" cy:directed="1"/>
      <edge id="3130" label="Q9CQJ8 (pp) Q99KI0" source="620" target="552" cy:directed="1"/>
      <edge id="3129" label="Q9CQJ8 (pp) Q91YT0" source="620" target="511" cy:directed="1"/>
      <edge id="3128" label="Q9CQJ8 (pp) Q99LC3" source="620" target="639" cy:directed="1"/>
      <edge id="3127" label="Q9CQJ8 (pp) Q9CPP6" source="620" target="609" cy:directed="1"/>
      <edge id="3126" label="Q9CQJ8 (pp) Q9CPQ8" source="620" target="626" cy:directed="1"/>
      <edge id="3125" label="Q9CQJ8 (pp) P43024" source="620" target="418" cy:directed="1"/>
      <edge id="3124" label="Q9CQJ8 (pp) Q9CQC7" source="620" target="396" cy:directed="1"/>
      <edge id="3123" label="Q9CQJ8 (pp) Q8K1Z0" source="620" target="571" cy:directed="1"/>
      <edge id="3122" label="Q9CQJ8 (pp) Q9CQZ5" source="620" target="684" cy:directed="1"/>
      <edge id="3121" label="Q9CQJ8 (pp) Q99LC5" source="620" target="575" cy:directed="1"/>
      <edge id="3120" label="Q9CQJ8 (pp) Q8VEM8" source="620" target="541" cy:directed="1"/>
      <edge id="3119" label="Q9CQJ8 (pp) Q03265" source="620" target="678" cy:directed="1"/>
      <edge id="3118" label="Q9CQJ8 (pp) Q62425" source="620" target="345" cy:directed="1"/>
      <edge id="3117" label="Q9CQJ8 (pp) Q9CR68" source="620" target="623" cy:directed="1"/>
      <edge id="3116" label="Q9CQJ8 (pp) Q9CQH3" source="620" target="650" cy:directed="1"/>
      <edge id="3115" label="Q9CQJ8 (pp) Q99LY9" source="620" target="638" cy:directed="1"/>
      <edge id="3114" label="Q9CQJ8 (pp) Q8K3J1" source="620" target="486" cy:directed="1"/>
      <edge id="3113" label="Q9CQJ8 (pp) Q9DCX2" source="620" target="524" cy:directed="1"/>
      <edge id="3112" label="Q9CQJ8 (pp) Q91VR2" source="620" target="627" cy:directed="1"/>
      <edge id="3111" label="Q9CQJ8 (pp) Q9D6J5" source="620" target="403" cy:directed="1"/>
      <edge id="3110" label="Q9CQJ8 (pp) Q91VD9" source="620" target="625" cy:directed="1"/>
      <edge id="3109" label="Q9CQJ8 (pp) Q9D3D9" source="620" target="680" cy:directed="1"/>
      <edge id="3108" label="Q9CQJ8 (pp) P99029" source="620" target="534" cy:directed="1"/>
      <edge id="3107" label="Q9CQJ8 (pp) P62073" source="620" target="535" cy:directed="1"/>
      <edge id="3106" label="Q9CQJ8 (pp) Q9DCS9" source="620" target="624" cy:directed="1"/>
      <edge id="3105" label="Q9CQJ8 (pp) Q9CQQ7" source="620" target="481" cy:directed="1"/>
      <edge id="3104" label="Q06185 (pp) Q99LY9" source="619" target="638" cy:directed="1"/>
      <edge id="3103" label="Q06185 (pp) Q9D6J6" source="619" target="683" cy:directed="1"/>
      <edge id="3102" label="Q06185 (pp) Q9CQH3" source="619" target="650" cy:directed="1"/>
      <edge id="3101" label="Q06185 (pp) P56391" source="619" target="559" cy:directed="1"/>
      <edge id="3100" label="Q06185 (pp) Q9DCJ5" source="619" target="510" cy:directed="1"/>
      <edge id="3099" label="Q06185 (pp) Q9CQ69" source="619" target="656" cy:directed="1"/>
      <edge id="3098" label="Q06185 (pp) O09111" source="619" target="679" cy:directed="1"/>
      <edge id="3097" label="Q06185 (pp) Q8K3J1" source="619" target="486" cy:directed="1"/>
      <edge id="3096" label="Q06185 (pp) Q91VR2" source="619" target="627" cy:directed="1"/>
      <edge id="3095" label="Q06185 (pp) Q9D3D9" source="619" target="680" cy:directed="1"/>
      <edge id="3094" label="Q06185 (pp) Q9ERS2" source="619" target="551" cy:directed="1"/>
      <edge id="3093" label="Q06185 (pp) Q9CQQ7" source="619" target="481" cy:directed="1"/>
      <edge id="3092" label="Q06185 (pp) Q9DCX2" source="619" target="524" cy:directed="1"/>
      <edge id="3091" label="Q06185 (pp) P03930" source="619" target="502" cy:directed="1"/>
      <edge id="3090" label="Q9DC70 (pp) Q9D0S9" source="618" target="617" cy:directed="1"/>
      <edge id="3089" label="Q9DC70 (pp) Q03265" source="618" target="678" cy:directed="1"/>
      <edge id="3088" label="Q9DC70 (pp) Q9CQZ5" source="618" target="684" cy:directed="1"/>
      <edge id="3087" label="Q9DC70 (pp) Q8K2B3" source="618" target="543" cy:directed="1"/>
      <edge id="3086" label="Q9DC70 (pp) P62073" source="618" target="535" cy:directed="1"/>
      <edge id="3085" label="Q9DC70 (pp) Q9Z1P6" source="618" target="591" cy:directed="1"/>
      <edge id="3084" label="Q9DC70 (pp) P42125" source="618" target="371" cy:directed="1"/>
      <edge id="3083" label="Q9DC70 (pp) Q9CQH3" source="618" target="650" cy:directed="1"/>
      <edge id="3082" label="Q9DC70 (pp) P56391" source="618" target="559" cy:directed="1"/>
      <edge id="3081" label="Q9DC70 (pp) P52503" source="618" target="538" cy:directed="1"/>
      <edge id="3080" label="Q9DC70 (pp) P97450" source="618" target="460" cy:directed="1"/>
      <edge id="3079" label="Q9DC70 (pp) Q99LC3" source="618" target="639" cy:directed="1"/>
      <edge id="3078" label="Q9DC70 (pp) Q99KI0" source="618" target="552" cy:directed="1"/>
      <edge id="3077" label="Q9DC70 (pp) P17751" source="618" target="593" cy:directed="1"/>
      <edge id="3076" label="Q9DC70 (pp) Q9D0M3" source="618" target="640" cy:directed="1"/>
      <edge id="3075" label="Q9DC70 (pp) Q9DCJ5" source="618" target="510" cy:directed="1"/>
      <edge id="3074" label="Q9DC70 (pp) Q9DCX2" source="618" target="524" cy:directed="1"/>
      <edge id="3073" label="Q9DC70 (pp) Q9D855" source="618" target="487" cy:directed="1"/>
      <edge id="3072" label="Q9DC70 (pp) Q9DB20" source="618" target="651" cy:directed="1"/>
      <edge id="3071" label="Q9DC70 (pp) Q3UIU2" source="618" target="602" cy:directed="1"/>
      <edge id="3070" label="Q9DC70 (pp) Q9CR68" source="618" target="623" cy:directed="1"/>
      <edge id="3069" label="Q9DC70 (pp) Q91YT0" source="618" target="511" cy:directed="1"/>
      <edge id="3068" label="Q9DC70 (pp) Q9CPP6" source="618" target="609" cy:directed="1"/>
      <edge id="3067" label="Q9DC70 (pp) P56480" source="618" target="632" cy:directed="1"/>
      <edge id="3066" label="Q9DC70 (pp) P70404" source="618" target="596" cy:directed="1"/>
      <edge id="3065" label="Q9DC70 (pp) Q9ERS2" source="618" target="551" cy:directed="1"/>
      <edge id="3064" label="Q9DC70 (pp) Q9CQJ8" source="618" target="620" cy:directed="1"/>
      <edge id="3063" label="Q9DC70 (pp) Q8K3J1" source="618" target="486" cy:directed="1"/>
      <edge id="3062" label="Q9DC70 (pp) Q9CQ69" source="618" target="656" cy:directed="1"/>
      <edge id="3061" label="Q9DC70 (pp) O09111" source="618" target="679" cy:directed="1"/>
      <edge id="3060" label="Q9DC70 (pp) O08756" source="618" target="507" cy:directed="1"/>
      <edge id="3059" label="Q9DC70 (pp) Q9D3D9" source="618" target="680" cy:directed="1"/>
      <edge id="3058" label="Q9DC70 (pp) Q9DCS9" source="618" target="624" cy:directed="1"/>
      <edge id="3057" label="Q9DC70 (pp) Q91VR2" source="618" target="627" cy:directed="1"/>
      <edge id="3056" label="Q9DC70 (pp) Q91Z53" source="618" target="555" cy:directed="1"/>
      <edge id="3055" label="Q9DC70 (pp) P19783" source="618" target="645" cy:directed="1"/>
      <edge id="3054" label="Q9DC70 (pp) Q91VD9" source="618" target="625" cy:directed="1"/>
      <edge id="3053" label="Q9DC70 (pp) Q91VT4" source="618" target="136" cy:directed="1"/>
      <edge id="3052" label="Q9DC70 (pp) Q9CZ13" source="618" target="641" cy:directed="1"/>
      <edge id="3051" label="Q9DC70 (pp) Q9D6J6" source="618" target="683" cy:directed="1"/>
      <edge id="3050" label="Q9DC70 (pp) Q06185" source="618" target="619" cy:directed="1"/>
      <edge id="3049" label="Q9DC70 (pp) Q9CXZ1" source="618" target="494" cy:directed="1"/>
      <edge id="3048" label="Q9DC70 (pp) Q9DC69" source="618" target="483" cy:directed="1"/>
      <edge id="3047" label="Q9D0S9 (pp) Q91Z53" source="617" target="555" cy:directed="1"/>
      <edge id="3046" label="Q9D0S9 (pp) O08756" source="617" target="507" cy:directed="1"/>
      <edge id="3045" label="Q9D1K2 (pp) Q9Z1G4" source="616" target="615" cy:directed="1"/>
      <edge id="3044" label="Q9D1K2 (pp) P62814" source="616" target="564" cy:directed="1"/>
      <edge id="3043" label="Q9D1K2 (pp) P63082" source="616" target="442" cy:directed="1"/>
      <edge id="3042" label="Q9D1K2 (pp) Q8K3J1" source="616" target="486" cy:directed="1"/>
      <edge id="3041" label="Q9D1K2 (pp) Q9Z1G3" source="616" target="666" cy:directed="1"/>
      <edge id="3040" label="Q9D1K2 (pp) Q9WTT4" source="616" target="401" cy:directed="1"/>
      <edge id="3039" label="Q9D1K2 (pp) Q9CQZ5" source="616" target="684" cy:directed="1"/>
      <edge id="3038" label="Q9D1K2 (pp) P51863" source="616" target="667" cy:directed="1"/>
      <edge id="3037" label="Q9D1K2 (pp) Q9CQ75" source="616" target="501" cy:directed="1"/>
      <edge id="3036" label="Q9D1K2 (pp) P50516" source="616" target="597" cy:directed="1"/>
      <edge id="3035" label="Q9D1K2 (pp) Q91VM9" source="616" target="484" cy:directed="1"/>
      <edge id="3034" label="Q9D1K2 (pp) Q9Z1P6" source="616" target="591" cy:directed="1"/>
      <edge id="3033" label="Q9D1K2 (pp) Q8BVE3" source="616" target="520" cy:directed="1"/>
      <edge id="3032" label="Q9D1K2 (pp) P57746" source="616" target="598" cy:directed="1"/>
      <edge id="3031" label="Q9D1K2 (pp) P50518" source="616" target="521" cy:directed="1"/>
      <edge id="3030" label="Q9Z1G4 (pp) P50516" source="615" target="597" cy:directed="1"/>
      <edge id="3029" label="Q9Z1G4 (pp) Q9WTT4" source="615" target="401" cy:directed="1"/>
      <edge id="3028" label="Q9Z1G4 (pp) P63082" source="615" target="442" cy:directed="1"/>
      <edge id="3027" label="Q9Z1G4 (pp) Q62277" source="615" target="536" cy:directed="1"/>
      <edge id="3026" label="Q9WUM5 (pp) Q9D0K2" source="614" target="613" cy:directed="1"/>
      <edge id="3025" label="Q9WUM5 (pp) Q9DC69" source="614" target="483" cy:directed="1"/>
      <edge id="3024" label="Q9WUM5 (pp) Q9CQQ7" source="614" target="481" cy:directed="1"/>
      <edge id="3023" label="Q9WUM5 (pp) Q9DCJ5" source="614" target="510" cy:directed="1"/>
      <edge id="3022" label="Q9WUM5 (pp) P06151" source="614" target="652" cy:directed="1"/>
      <edge id="3021" label="Q9WUM5 (pp) Q9D6J6" source="614" target="683" cy:directed="1"/>
      <edge id="3020" label="Q9WUM5 (pp) Q91VR2" source="614" target="627" cy:directed="1"/>
      <edge id="3019" label="Q9WUM5 (pp) Q99JY0" source="614" target="506" cy:directed="1"/>
      <edge id="3018" label="Q9WUM5 (pp) Q60597" source="614" target="379" cy:directed="1"/>
      <edge id="3017" label="Q9WUM5 (pp) Q99LX0" source="614" target="573" cy:directed="1"/>
      <edge id="3016" label="Q9WUM5 (pp) Q9ERS2" source="614" target="551" cy:directed="1"/>
      <edge id="3015" label="Q9WUM5 (pp) Q9CQH3" source="614" target="650" cy:directed="1"/>
      <edge id="3014" label="Q9WUM5 (pp) Q60931" source="614" target="334" cy:directed="1"/>
      <edge id="3013" label="Q9WUM5 (pp) Q8VEM8" source="614" target="541" cy:directed="1"/>
      <edge id="3012" label="Q9CQN1 (pp) P63037" source="612" target="611" cy:directed="1"/>
      <edge id="3011" label="Q9CQN1 (pp) Q8K3J1" source="612" target="486" cy:directed="1"/>
      <edge id="3010" label="Q9CQN1 (pp) Q91YT0" source="612" target="511" cy:directed="1"/>
      <edge id="3009" label="Q9CQN1 (pp) P63038" source="612" target="643" cy:directed="1"/>
      <edge id="3008" label="P63037 (pp) Q91VR2" source="611" target="627" cy:directed="1"/>
      <edge id="3007" label="P63037 (pp) Q61699" source="611" target="172" cy:directed="1"/>
      <edge id="3006" label="Q9DCW4 (pp) Q9CPP6" source="610" target="609" cy:directed="1"/>
      <edge id="3005" label="Q9DCW4 (pp) Q9DCJ5" source="610" target="510" cy:directed="1"/>
      <edge id="3004" label="Q9DCW4 (pp) P56391" source="610" target="559" cy:directed="1"/>
      <edge id="3003" label="Q9DCW4 (pp) P51174" source="610" target="498" cy:directed="1"/>
      <edge id="3002" label="Q9DCW4 (pp) Q9DB20" source="610" target="651" cy:directed="1"/>
      <edge id="3001" label="Q9DCW4 (pp) Q9D3D9" source="610" target="680" cy:directed="1"/>
      <edge id="3000" label="Q9DCW4 (pp) Q8JZN5" source="610" target="496" cy:directed="1"/>
      <edge id="2999" label="Q9DCW4 (pp) Q9CQA3" source="610" target="578" cy:directed="1"/>
      <edge id="2998" label="Q9DCW4 (pp) Q9Z2I9" source="610" target="432" cy:directed="1"/>
      <edge id="2997" label="Q9DCW4 (pp) Q06185" source="610" target="619" cy:directed="1"/>
      <edge id="2996" label="Q9DCW4 (pp) O09111" source="610" target="679" cy:directed="1"/>
      <edge id="2995" label="Q9DCW4 (pp) Q9D6J5" source="610" target="403" cy:directed="1"/>
      <edge id="2994" label="Q9DCW4 (pp) Q91YT0" source="610" target="511" cy:directed="1"/>
      <edge id="2993" label="Q9DCW4 (pp) Q9ERS2" source="610" target="551" cy:directed="1"/>
      <edge id="2992" label="Q9DCW4 (pp) Q8BMS1" source="610" target="374" cy:directed="1"/>
      <edge id="2991" label="Q9DCW4 (pp) Q8K3J1" source="610" target="486" cy:directed="1"/>
      <edge id="2990" label="Q9DCW4 (pp) P08249" source="610" target="655" cy:directed="1"/>
      <edge id="2989" label="Q9DCW4 (pp) P17751" source="610" target="593" cy:directed="1"/>
      <edge id="2988" label="Q9DCW4 (pp) Q91Z53" source="610" target="555" cy:directed="1"/>
      <edge id="2987" label="Q9DCW4 (pp) Q9WUM5" source="610" target="614" cy:directed="1"/>
      <edge id="2986" label="Q9DCW4 (pp) P42125" source="610" target="371" cy:directed="1"/>
      <edge id="2985" label="Q9DCW4 (pp) Q9DBL1" source="610" target="439" cy:directed="1"/>
      <edge id="2984" label="Q9DCW4 (pp) Q921G7" source="610" target="580" cy:directed="1"/>
      <edge id="2983" label="Q9DCW4 (pp) Q99LC3" source="610" target="639" cy:directed="1"/>
      <edge id="2982" label="Q9DCW4 (pp) Q80U28" source="610" target="231" cy:directed="1"/>
      <edge id="2981" label="Q9DCW4 (pp) P19783" source="610" target="645" cy:directed="1"/>
      <edge id="2980" label="Q9DCW4 (pp) Q9DC69" source="610" target="483" cy:directed="1"/>
      <edge id="2979" label="Q9DCW4 (pp) Q99LC5" source="610" target="575" cy:directed="1"/>
      <edge id="2978" label="Q9DCW4 (pp) P52503" source="610" target="538" cy:directed="1"/>
      <edge id="2977" label="Q9DCW4 (pp) Q9CQJ8" source="610" target="620" cy:directed="1"/>
      <edge id="2976" label="Q9DCW4 (pp) Q8BH95" source="610" target="642" cy:directed="1"/>
      <edge id="2975" label="Q9DCW4 (pp) Q9DCT2" source="610" target="657" cy:directed="1"/>
      <edge id="2974" label="Q9DCW4 (pp) Q9JHI5" source="610" target="437" cy:directed="1"/>
      <edge id="2973" label="Q9DCW4 (pp) O08756" source="610" target="507" cy:directed="1"/>
      <edge id="2972" label="Q9DCW4 (pp) Q8BWT1" source="610" target="579" cy:directed="1"/>
      <edge id="2971" label="Q9DCW4 (pp) Q9DCS9" source="610" target="624" cy:directed="1"/>
      <edge id="2970" label="Q9DCW4 (pp) Q61425" source="610" target="576" cy:directed="1"/>
      <edge id="2969" label="Q9DCW4 (pp) Q9Z1P6" source="610" target="591" cy:directed="1"/>
      <edge id="2968" label="Q9DCW4 (pp) Q9D6J6" source="610" target="683" cy:directed="1"/>
      <edge id="2967" label="Q9DCW4 (pp) Q9D0S9" source="610" target="617" cy:directed="1"/>
      <edge id="2966" label="Q9DCW4 (pp) Q8QZT1" source="610" target="333" cy:directed="1"/>
      <edge id="2965" label="Q9DCW4 (pp) Q9DC70" source="610" target="618" cy:directed="1"/>
      <edge id="2964" label="Q9DCW4 (pp) Q8R4N0" source="610" target="539" cy:directed="1"/>
      <edge id="2963" label="Q9DCW4 (pp) P50544" source="610" target="431" cy:directed="1"/>
      <edge id="2962" label="Q9CPP6 (pp) Q9D6J6" source="609" target="683" cy:directed="1"/>
      <edge id="2961" label="Q9CPP6 (pp) Q9DB77" source="609" target="485" cy:directed="1"/>
      <edge id="2960" label="Q9CPP6 (pp) Q9DCX2" source="609" target="524" cy:directed="1"/>
      <edge id="2959" label="Q9CPP6 (pp) P48771" source="609" target="587" cy:directed="1"/>
      <edge id="2958" label="Q9CPP6 (pp) Q9DCJ5" source="609" target="510" cy:directed="1"/>
      <edge id="2957" label="Q9CPP6 (pp) Q99LY9" source="609" target="638" cy:directed="1"/>
      <edge id="2956" label="Q9CPP6 (pp) Q9ERS2" source="609" target="551" cy:directed="1"/>
      <edge id="2955" label="Q9CPP6 (pp) Q9CQZ6" source="609" target="659" cy:directed="1"/>
      <edge id="2954" label="Q9CPP6 (pp) Q91VD9" source="609" target="625" cy:directed="1"/>
      <edge id="2953" label="Q9CPP6 (pp) Q8K3J1" source="609" target="486" cy:directed="1"/>
      <edge id="2952" label="Q9CPP6 (pp) Q9CQ69" source="609" target="656" cy:directed="1"/>
      <edge id="2951" label="Q9CPP6 (pp) Q99LC5" source="609" target="575" cy:directed="1"/>
      <edge id="2950" label="Q9CPP6 (pp) Q9D6J5" source="609" target="403" cy:directed="1"/>
      <edge id="2949" label="Q9CPP6 (pp) Q9CQH3" source="609" target="650" cy:directed="1"/>
      <edge id="2948" label="Q9CPP6 (pp) Q9WUM5" source="609" target="614" cy:directed="1"/>
      <edge id="2947" label="Q9CPP6 (pp) Q9Z1P6" source="609" target="591" cy:directed="1"/>
      <edge id="2946" label="Q9CPP6 (pp) P56391" source="609" target="559" cy:directed="1"/>
      <edge id="2945" label="Q9CPP6 (pp) P43024" source="609" target="418" cy:directed="1"/>
      <edge id="2944" label="Q9CPP6 (pp) Q91YT0" source="609" target="511" cy:directed="1"/>
      <edge id="2943" label="P46460 (pp) Q01097" source="607" target="686" cy:directed="1"/>
      <edge id="2942" label="P46460 (pp) Q9CWZ7" source="607" target="197" cy:directed="1"/>
      <edge id="2941" label="P46460 (pp) Q62442" source="607" target="557" cy:directed="1"/>
      <edge id="2940" label="P46460 (pp) O08599" source="607" target="216" cy:directed="1"/>
      <edge id="2939" label="P46460 (pp) O35526" source="607" target="561" cy:directed="1"/>
      <edge id="2938" label="P46460 (pp) P35438" source="607" target="675" cy:directed="1"/>
      <edge id="2937" label="P46460 (pp) P23819" source="607" target="671" cy:directed="1"/>
      <edge id="2936" label="P46460 (pp) P63101" source="607" target="411" cy:directed="1"/>
      <edge id="2935" label="Q08331 (pp) Q9CQ62" source="606" target="605" cy:directed="1"/>
      <edge id="2934" label="Q08331 (pp) Q01097" source="606" target="686" cy:directed="1"/>
      <edge id="2933" label="Q9CQ62 (pp) Q99JY0" source="605" target="506" cy:directed="1"/>
      <edge id="2932" label="Q9CQ62 (pp) Q8BWT1" source="605" target="579" cy:directed="1"/>
      <edge id="2931" label="Q9CQ62 (pp) Q99LC5" source="605" target="575" cy:directed="1"/>
      <edge id="2930" label="Q9CQ62 (pp) P19096" source="605" target="204" cy:directed="1"/>
      <edge id="2929" label="Q9CQ62 (pp) P41216" source="605" target="262" cy:directed="1"/>
      <edge id="2928" label="Q9D2G2 (pp) Q91VR2" source="603" target="627" cy:directed="1"/>
      <edge id="2927" label="Q9D2G2 (pp) Q9WUM5" source="603" target="614" cy:directed="1"/>
      <edge id="2926" label="Q9D2G2 (pp) Q60597" source="603" target="379" cy:directed="1"/>
      <edge id="2925" label="Q9D2G2 (pp) Q9D3D9" source="603" target="680" cy:directed="1"/>
      <edge id="2924" label="Q3UIU2 (pp) Q9D6J6" source="602" target="683" cy:directed="1"/>
      <edge id="2923" label="Q3UIU2 (pp) Q9CQH3" source="602" target="650" cy:directed="1"/>
      <edge id="2922" label="P31938 (pp) P63085" source="601" target="635" cy:directed="1"/>
      <edge id="2921" label="P31938 (pp) P35438" source="601" target="675" cy:directed="1"/>
      <edge id="2920" label="P31938 (pp) P16054" source="601" target="447" cy:directed="1"/>
      <edge id="2919" label="P17427 (pp) P17426" source="600" target="599" cy:directed="1"/>
      <edge id="2918" label="P17427 (pp) Q68FD5" source="600" target="514" cy:directed="1"/>
      <edge id="2917" label="P17427 (pp) O08585" source="600" target="283" cy:directed="1"/>
      <edge id="2916" label="P17427 (pp) Q80VP1" source="600" target="258" cy:directed="1"/>
      <edge id="2915" label="P17427 (pp) P62743" source="600" target="233" cy:directed="1"/>
      <edge id="2914" label="P17427 (pp) P39053" source="600" target="393" cy:directed="1"/>
      <edge id="2913" label="P17427 (pp) Q8CHC4" source="600" target="251" cy:directed="1"/>
      <edge id="2912" label="P17427 (pp) Q6IRU5" source="600" target="353" cy:directed="1"/>
      <edge id="2911" label="P17427 (pp) P84091" source="600" target="321" cy:directed="1"/>
      <edge id="2910" label="P17427 (pp) Q9DBG3" source="600" target="354" cy:directed="1"/>
      <edge id="2909" label="P17426 (pp) P62743" source="599" target="233" cy:directed="1"/>
      <edge id="2908" label="P17426 (pp) O08585" source="599" target="283" cy:directed="1"/>
      <edge id="2907" label="P17426 (pp) Q80VP1" source="599" target="258" cy:directed="1"/>
      <edge id="2906" label="P17426 (pp) Q8CHC4" source="599" target="251" cy:directed="1"/>
      <edge id="2905" label="P57746 (pp) P50516" source="598" target="597" cy:directed="1"/>
      <edge id="2904" label="P57746 (pp) Q8BVE3" source="598" target="520" cy:directed="1"/>
      <edge id="2903" label="P57746 (pp) Q9Z1G4" source="598" target="615" cy:directed="1"/>
      <edge id="2902" label="P57746 (pp) Q9CQZ6" source="598" target="659" cy:directed="1"/>
      <edge id="2901" label="P57746 (pp) P97450" source="598" target="460" cy:directed="1"/>
      <edge id="2900" label="P57746 (pp) Q9Z1G3" source="598" target="666" cy:directed="1"/>
      <edge id="2899" label="P57746 (pp) Q9WTT4" source="598" target="401" cy:directed="1"/>
      <edge id="2898" label="P57746 (pp) P23506" source="598" target="404" cy:directed="1"/>
      <edge id="2897" label="P57746 (pp) P63082" source="598" target="442" cy:directed="1"/>
      <edge id="2896" label="P57746 (pp) Q9CQH3" source="598" target="650" cy:directed="1"/>
      <edge id="2895" label="P50516 (pp) Q9JHU4" source="597" target="488" cy:directed="1"/>
      <edge id="2894" label="P50516 (pp) Q9R0K7" source="597" target="467" cy:directed="1"/>
      <edge id="2893" label="P50516 (pp) Q8BPN8" source="597" target="443" cy:directed="1"/>
      <edge id="2892" label="P50516 (pp) P60710" source="597" target="548" cy:directed="1"/>
      <edge id="2891" label="P50516 (pp) Q7TPR4" source="597" target="424" cy:directed="1"/>
      <edge id="2890" label="P50516 (pp) P39053" source="597" target="393" cy:directed="1"/>
      <edge id="2889" label="P50516 (pp) Q7TQF7" source="597" target="385" cy:directed="1"/>
      <edge id="2888" label="P50516 (pp) P53395" source="597" target="438" cy:directed="1"/>
      <edge id="2887" label="P50516 (pp) P55088" source="597" target="355" cy:directed="1"/>
      <edge id="2886" label="P50516 (pp) Q9D6J6" source="597" target="683" cy:directed="1"/>
      <edge id="2885" label="P50516 (pp) P46460" source="597" target="607" cy:directed="1"/>
      <edge id="2884" label="P50516 (pp) P46660" source="597" target="489" cy:directed="1"/>
      <edge id="2883" label="P50516 (pp) Q9QYR6" source="597" target="282" cy:directed="1"/>
      <edge id="2882" label="P50516 (pp) P01831" source="597" target="271" cy:directed="1"/>
      <edge id="2881" label="P50516 (pp) P28660" source="597" target="508" cy:directed="1"/>
      <edge id="2880" label="P50516 (pp) Q9D6R2" source="597" target="654" cy:directed="1"/>
      <edge id="2879" label="P50516 (pp) P47754" source="597" target="453" cy:directed="1"/>
      <edge id="2878" label="P50516 (pp) Q5SQX6" source="597" target="287" cy:directed="1"/>
      <edge id="2877" label="P50516 (pp) Q5DQR4" source="597" target="219" cy:directed="1"/>
      <edge id="2876" label="P50516 (pp) O35643" source="597" target="211" cy:directed="1"/>
      <edge id="2875" label="P50516 (pp) Q9Z2I0" source="597" target="180" cy:directed="1"/>
      <edge id="2874" label="P50516 (pp) Q62425" source="597" target="345" cy:directed="1"/>
      <edge id="2873" label="P50516 (pp) P63082" source="597" target="442" cy:directed="1"/>
      <edge id="2872" label="P50516 (pp) O08539" source="597" target="294" cy:directed="1"/>
      <edge id="2871" label="P50516 (pp) Q9JLM8" source="597" target="462" cy:directed="1"/>
      <edge id="2870" label="P50516 (pp) Q8VD37" source="597" target="332" cy:directed="1"/>
      <edge id="2869" label="P50516 (pp) P17427" source="597" target="600" cy:directed="1"/>
      <edge id="2868" label="P50516 (pp) Q99LX0" source="597" target="573" cy:directed="1"/>
      <edge id="2867" label="P50516 (pp) Q80XN0" source="597" target="116" cy:directed="1"/>
      <edge id="2866" label="P50516 (pp) O54983" source="597" target="177" cy:directed="1"/>
      <edge id="2865" label="P50516 (pp) P17426" source="597" target="599" cy:directed="1"/>
      <edge id="2864" label="P50516 (pp) Q9Z0E0" source="597" target="89" cy:directed="1"/>
      <edge id="2863" label="P50516 (pp) Q9Z1J3" source="597" target="347" cy:directed="1"/>
      <edge id="2862" label="P50516 (pp) Q3UHL1" source="597" target="285" cy:directed="1"/>
      <edge id="2861" label="P50516 (pp) Q91VR2" source="597" target="627" cy:directed="1"/>
      <edge id="2860" label="P50516 (pp) P12382" source="597" target="676" cy:directed="1"/>
      <edge id="2859" label="P50516 (pp) P08553" source="597" target="173" cy:directed="1"/>
      <edge id="2858" label="P70404 (pp) Q91VR2" source="596" target="627" cy:directed="1"/>
      <edge id="2857" label="P70404 (pp) Q9WUM5" source="596" target="614" cy:directed="1"/>
      <edge id="2856" label="P70404 (pp) Q9DC69" source="596" target="483" cy:directed="1"/>
      <edge id="2855" label="P70404 (pp) Q60597" source="596" target="379" cy:directed="1"/>
      <edge id="2854" label="P70404 (pp) Q9D2G2" source="596" target="603" cy:directed="1"/>
      <edge id="2853" label="O88441 (pp) Q9D6J6" source="595" target="683" cy:directed="1"/>
      <edge id="2852" label="O88441 (pp) Q9CQH3" source="595" target="650" cy:directed="1"/>
      <edge id="2851" label="O88441 (pp) Q6PB66" source="595" target="392" cy:directed="1"/>
      <edge id="2850" label="Q7TQI3 (pp) P68510" source="594" target="677" cy:directed="1"/>
      <edge id="2849" label="P17751 (pp) P06745" source="593" target="426" cy:directed="1"/>
      <edge id="2848" label="P17751 (pp) P05063" source="593" target="378" cy:directed="1"/>
      <edge id="2847" label="P17751 (pp) P17182" source="593" target="375" cy:directed="1"/>
      <edge id="2846" label="P17751 (pp) Q99LX0" source="593" target="573" cy:directed="1"/>
      <edge id="2845" label="P17751 (pp) P09411" source="593" target="592" cy:directed="1"/>
      <edge id="2844" label="P17751 (pp) Q93092" source="593" target="436" cy:directed="1"/>
      <edge id="2843" label="P17751 (pp) Q9CZ13" source="593" target="641" cy:directed="1"/>
      <edge id="2842" label="P17751 (pp) Q9D6J6" source="593" target="683" cy:directed="1"/>
      <edge id="2841" label="P17751 (pp) P56480" source="593" target="632" cy:directed="1"/>
      <edge id="2840" label="P17751 (pp) Q91VD9" source="593" target="625" cy:directed="1"/>
      <edge id="2839" label="P17751 (pp) P70296" source="593" target="223" cy:directed="1"/>
      <edge id="2838" label="P17751 (pp) Q9D2G2" source="593" target="603" cy:directed="1"/>
      <edge id="2837" label="P17751 (pp) Q64521" source="593" target="465" cy:directed="1"/>
      <edge id="2836" label="P17751 (pp) P47857" source="593" target="359" cy:directed="1"/>
      <edge id="2835" label="P17751 (pp) P16858" source="593" target="331" cy:directed="1"/>
      <edge id="2834" label="P17751 (pp) Q9WUM5" source="593" target="614" cy:directed="1"/>
      <edge id="2833" label="P17751 (pp) P23506" source="593" target="404" cy:directed="1"/>
      <edge id="2832" label="P17751 (pp) P99029" source="593" target="534" cy:directed="1"/>
      <edge id="2831" label="P17751 (pp) Q8K3J1" source="593" target="486" cy:directed="1"/>
      <edge id="2830" label="P17751 (pp) P97807" source="593" target="550" cy:directed="1"/>
      <edge id="2829" label="P17751 (pp) Q03265" source="593" target="678" cy:directed="1"/>
      <edge id="2828" label="P17751 (pp) P05064" source="593" target="569" cy:directed="1"/>
      <edge id="2827" label="P17751 (pp) Q9CR68" source="593" target="623" cy:directed="1"/>
      <edge id="2826" label="P17751 (pp) Q9WUA3" source="593" target="380" cy:directed="1"/>
      <edge id="2825" label="P17751 (pp) Q91VR2" source="593" target="627" cy:directed="1"/>
      <edge id="2824" label="P17751 (pp) P63101" source="593" target="411" cy:directed="1"/>
      <edge id="2823" label="P17751 (pp) P52480" source="593" target="435" cy:directed="1"/>
      <edge id="2822" label="P17751 (pp) P06151" source="593" target="652" cy:directed="1"/>
      <edge id="2821" label="P17751 (pp) Q9R0P5" source="593" target="74" cy:directed="1"/>
      <edge id="2820" label="P17751 (pp) Q91YT0" source="593" target="511" cy:directed="1"/>
      <edge id="2819" label="P09411 (pp) Q9DCD0" source="592" target="668" cy:directed="1"/>
      <edge id="2818" label="P09411 (pp) P17182" source="592" target="375" cy:directed="1"/>
      <edge id="2817" label="P09411 (pp) P17742" source="592" target="631" cy:directed="1"/>
      <edge id="2816" label="P09411 (pp) P16858" source="592" target="331" cy:directed="1"/>
      <edge id="2815" label="P09411 (pp) P06151" source="592" target="652" cy:directed="1"/>
      <edge id="2814" label="Q9Z1P6 (pp) Q9D6J6" source="591" target="683" cy:directed="1"/>
      <edge id="2813" label="Q9Z1P6 (pp) Q9ERS2" source="591" target="551" cy:directed="1"/>
      <edge id="2812" label="Q9Z1P6 (pp) P56391" source="591" target="559" cy:directed="1"/>
      <edge id="2811" label="Q9Z1P6 (pp) Q3UIU2" source="591" target="602" cy:directed="1"/>
      <edge id="2810" label="Q9Z1P6 (pp) Q9D3D9" source="591" target="680" cy:directed="1"/>
      <edge id="2809" label="Q9Z1P6 (pp) Q9DC69" source="591" target="483" cy:directed="1"/>
      <edge id="2808" label="Q9Z1P6 (pp) Q9CPQ8" source="591" target="626" cy:directed="1"/>
      <edge id="2807" label="Q9Z1P6 (pp) Q99LX0" source="591" target="573" cy:directed="1"/>
      <edge id="2806" label="Q9Z1P6 (pp) Q9CQ69" source="591" target="656" cy:directed="1"/>
      <edge id="2805" label="Q9Z1P6 (pp) Q9CQH3" source="591" target="650" cy:directed="1"/>
      <edge id="2804" label="Q9Z1P6 (pp) Q9DCJ5" source="591" target="510" cy:directed="1"/>
      <edge id="2803" label="Q9Z1P6 (pp) Q8K3J1" source="591" target="486" cy:directed="1"/>
      <edge id="2802" label="Q9Z1P6 (pp) Q06185" source="591" target="619" cy:directed="1"/>
      <edge id="2801" label="Q9Z1P6 (pp) O08756" source="591" target="507" cy:directed="1"/>
      <edge id="2800" label="Q9Z1P6 (pp) Q9DCS9" source="591" target="624" cy:directed="1"/>
      <edge id="2799" label="Q9Z1P6 (pp) Q91YT0" source="591" target="511" cy:directed="1"/>
      <edge id="2798" label="Q9Z1P6 (pp) Q9DCX2" source="591" target="524" cy:directed="1"/>
      <edge id="2797" label="Q9Z1P6 (pp) O09111" source="591" target="679" cy:directed="1"/>
      <edge id="2796" label="P63137 (pp) P62812" source="590" target="589" cy:directed="1"/>
      <edge id="2795" label="P62812 (pp) P63328" source="589" target="275" cy:directed="1"/>
      <edge id="2794" label="P62812 (pp) P22723" source="589" target="234" cy:directed="1"/>
      <edge id="2793" label="O70325 (pp) Q99LX0" source="588" target="573" cy:directed="1"/>
      <edge id="2792" label="O70325 (pp) Q9D3D9" source="588" target="680" cy:directed="1"/>
      <edge id="2791" label="O70325 (pp) Q9ERS2" source="588" target="551" cy:directed="1"/>
      <edge id="2790" label="O70325 (pp) P99029" source="588" target="534" cy:directed="1"/>
      <edge id="2789" label="P48771 (pp) Q9DC69" source="587" target="483" cy:directed="1"/>
      <edge id="2788" label="P48771 (pp) Q91VR2" source="587" target="627" cy:directed="1"/>
      <edge id="2787" label="P48771 (pp) P56391" source="587" target="559" cy:directed="1"/>
      <edge id="2786" label="P48771 (pp) Q99LX0" source="587" target="573" cy:directed="1"/>
      <edge id="2785" label="P48771 (pp) Q06185" source="587" target="619" cy:directed="1"/>
      <edge id="2784" label="P48771 (pp) Q9D6J6" source="587" target="683" cy:directed="1"/>
      <edge id="2783" label="P48771 (pp) Q9CQH3" source="587" target="650" cy:directed="1"/>
      <edge id="2782" label="P48771 (pp) Q9CQ69" source="587" target="656" cy:directed="1"/>
      <edge id="2781" label="P48771 (pp) P43024" source="587" target="418" cy:directed="1"/>
      <edge id="2780" label="Q64133 (pp) P47738" source="586" target="585" cy:directed="1"/>
      <edge id="2779" label="Q64133 (pp) Q9JLJ2" source="586" target="628" cy:directed="1"/>
      <edge id="2778" label="Q64133 (pp) Q9CZS1" source="586" target="478" cy:directed="1"/>
      <edge id="2777" label="Q64133 (pp) Q9DBF1" source="586" target="408" cy:directed="1"/>
      <edge id="2776" label="P47738 (pp) P61922" source="585" target="566" cy:directed="1"/>
      <edge id="2775" label="P47738 (pp) Q8CHT0" source="585" target="388" cy:directed="1"/>
      <edge id="2774" label="P47738 (pp) Q9EQ20" source="585" target="528" cy:directed="1"/>
      <edge id="2773" label="P47738 (pp) Q8BW75" source="585" target="217" cy:directed="1"/>
      <edge id="2772" label="P63005 (pp) Q6PER3" source="584" target="583" cy:directed="1"/>
      <edge id="2771" label="P63005 (pp) O08788" source="584" target="553" cy:directed="1"/>
      <edge id="2770" label="P63005 (pp) Q99KJ8" source="584" target="554" cy:directed="1"/>
      <edge id="2769" label="P63005 (pp) P20357" source="584" target="270" cy:directed="1"/>
      <edge id="2768" label="Q6PER3 (pp) O08788" source="583" target="553" cy:directed="1"/>
      <edge id="2767" label="O70161 (pp) Q9Z1B3" source="582" target="581" cy:directed="1"/>
      <edge id="2766" label="O70161 (pp) P17426" source="582" target="599" cy:directed="1"/>
      <edge id="2765" label="O70161 (pp) Q71LX4" source="582" target="193" cy:directed="1"/>
      <edge id="2764" label="Q9Z1B3 (pp) Q01097" source="581" target="686" cy:directed="1"/>
      <edge id="2763" label="Q9Z1B3 (pp) P35438" source="581" target="675" cy:directed="1"/>
      <edge id="2762" label="Q921G7 (pp) Q8BWT1" source="580" target="579" cy:directed="1"/>
      <edge id="2761" label="Q921G7 (pp) Q61425" source="580" target="576" cy:directed="1"/>
      <edge id="2760" label="Q921G7 (pp) Q8BMS1" source="580" target="374" cy:directed="1"/>
      <edge id="2759" label="Q921G7 (pp) Q9D6J6" source="580" target="683" cy:directed="1"/>
      <edge id="2758" label="Q921G7 (pp) Q99JY0" source="580" target="506" cy:directed="1"/>
      <edge id="2757" label="Q921G7 (pp) Q9WUM5" source="580" target="614" cy:directed="1"/>
      <edge id="2756" label="Q921G7 (pp) Q80U28" source="580" target="231" cy:directed="1"/>
      <edge id="2755" label="Q921G7 (pp) Q9CQ62" source="580" target="605" cy:directed="1"/>
      <edge id="2754" label="Q921G7 (pp) Q99LC5" source="580" target="575" cy:directed="1"/>
      <edge id="2753" label="Q8BWT1 (pp) Q9D0K2" source="579" target="613" cy:directed="1"/>
      <edge id="2752" label="Q8BWT1 (pp) Q9DBL1" source="579" target="439" cy:directed="1"/>
      <edge id="2751" label="Q8BWT1 (pp) Q9EQ20" source="579" target="528" cy:directed="1"/>
      <edge id="2750" label="Q8BWT1 (pp) Q99JY0" source="579" target="506" cy:directed="1"/>
      <edge id="2749" label="Q8BWT1 (pp) Q8BMS1" source="579" target="374" cy:directed="1"/>
      <edge id="2748" label="Q8BWT1 (pp) Q9WUM5" source="579" target="614" cy:directed="1"/>
      <edge id="2747" label="Q8BWT1 (pp) O08756" source="579" target="507" cy:directed="1"/>
      <edge id="2746" label="Q8BWT1 (pp) Q91ZA3" source="579" target="413" cy:directed="1"/>
      <edge id="2745" label="Q9CQA3 (pp) Q9D0M3" source="578" target="640" cy:directed="1"/>
      <edge id="2744" label="Q9CQA3 (pp) Q9CZ13" source="578" target="641" cy:directed="1"/>
      <edge id="2743" label="Q9CQA3 (pp) Q06185" source="578" target="619" cy:directed="1"/>
      <edge id="2742" label="Q9CQA3 (pp) Q8K3J1" source="578" target="486" cy:directed="1"/>
      <edge id="2741" label="Q9CQA3 (pp) Q9Z2I9" source="578" target="432" cy:directed="1"/>
      <edge id="2740" label="Q9CQA3 (pp) Q9Z1P6" source="578" target="591" cy:directed="1"/>
      <edge id="2739" label="Q9CQA3 (pp) Q9DCS9" source="578" target="624" cy:directed="1"/>
      <edge id="2738" label="Q9CQA3 (pp) Q9CQZ6" source="578" target="659" cy:directed="1"/>
      <edge id="2737" label="Q9CQA3 (pp) Q9D2G2" source="578" target="603" cy:directed="1"/>
      <edge id="2736" label="Q9CQA3 (pp) Q9DCJ5" source="578" target="510" cy:directed="1"/>
      <edge id="2735" label="Q9CQA3 (pp) P54071" source="578" target="653" cy:directed="1"/>
      <edge id="2734" label="Q9CQA3 (pp) Q99KI0" source="578" target="552" cy:directed="1"/>
      <edge id="2733" label="Q9CQA3 (pp) Q9CQ62" source="578" target="605" cy:directed="1"/>
      <edge id="2732" label="Q9CQA3 (pp) Q9DB20" source="578" target="651" cy:directed="1"/>
      <edge id="2731" label="Q9CQA3 (pp) Q9D855" source="578" target="487" cy:directed="1"/>
      <edge id="2730" label="Q9CQA3 (pp) P97807" source="578" target="550" cy:directed="1"/>
      <edge id="2729" label="Q9CQA3 (pp) P70404" source="578" target="596" cy:directed="1"/>
      <edge id="2728" label="Q9CQA3 (pp) Q9CPQ1" source="578" target="286" cy:directed="1"/>
      <edge id="2727" label="Q9CQA3 (pp) Q9CQH3" source="578" target="650" cy:directed="1"/>
      <edge id="2726" label="Q9CQA3 (pp) P52503" source="578" target="538" cy:directed="1"/>
      <edge id="2725" label="Q9CQA3 (pp) Q9DC69" source="578" target="483" cy:directed="1"/>
      <edge id="2724" label="Q9CQA3 (pp) Q9WUM5" source="578" target="614" cy:directed="1"/>
      <edge id="2723" label="Q9CQA3 (pp) Q9D6J5" source="578" target="403" cy:directed="1"/>
      <edge id="2722" label="Q9CQA3 (pp) P56391" source="578" target="559" cy:directed="1"/>
      <edge id="2721" label="Q9CQA3 (pp) Q9DB77" source="578" target="485" cy:directed="1"/>
      <edge id="2720" label="Q9CQA3 (pp) Q9CQ75" source="578" target="501" cy:directed="1"/>
      <edge id="2719" label="Q9CQA3 (pp) Q8K2B3" source="578" target="543" cy:directed="1"/>
      <edge id="2718" label="Q9CQA3 (pp) Q9CR68" source="578" target="623" cy:directed="1"/>
      <edge id="2717" label="Q9CQA3 (pp) Q91VD9" source="578" target="625" cy:directed="1"/>
      <edge id="2716" label="Q9CQA3 (pp) Q9D6J6" source="578" target="683" cy:directed="1"/>
      <edge id="2715" label="Q9CQA3 (pp) P20108" source="578" target="463" cy:directed="1"/>
      <edge id="2714" label="Q9CQA3 (pp) Q9CQZ5" source="578" target="684" cy:directed="1"/>
      <edge id="2713" label="Q9CQA3 (pp) Q99LC5" source="578" target="575" cy:directed="1"/>
      <edge id="2712" label="Q9CQA3 (pp) Q9CQQ7" source="578" target="481" cy:directed="1"/>
      <edge id="2711" label="Q9CQA3 (pp) Q7TMF3" source="578" target="525" cy:directed="1"/>
      <edge id="2710" label="Q9CQA3 (pp) Q03265" source="578" target="678" cy:directed="1"/>
      <edge id="2709" label="Q9CQA3 (pp) Q91VR2" source="578" target="627" cy:directed="1"/>
      <edge id="2708" label="Q9CQA3 (pp) Q61425" source="578" target="576" cy:directed="1"/>
      <edge id="2707" label="Q9CQA3 (pp) Q64521" source="578" target="465" cy:directed="1"/>
      <edge id="2706" label="Q9CQA3 (pp) Q8VEM8" source="578" target="541" cy:directed="1"/>
      <edge id="2705" label="Q9CQA3 (pp) Q91YT0" source="578" target="511" cy:directed="1"/>
      <edge id="2704" label="Q9CQA3 (pp) Q9DCX2" source="578" target="524" cy:directed="1"/>
      <edge id="2703" label="Q9CQA3 (pp) P56480" source="578" target="632" cy:directed="1"/>
      <edge id="2702" label="Q9CQA3 (pp) P97450" source="578" target="460" cy:directed="1"/>
      <edge id="2701" label="Q9CQA3 (pp) Q9DCD0" source="578" target="668" cy:directed="1"/>
      <edge id="2700" label="Q9CQA3 (pp) Q9CPP6" source="578" target="609" cy:directed="1"/>
      <edge id="2699" label="Q9CQA3 (pp) Q91WD5" source="578" target="544" cy:directed="1"/>
      <edge id="2698" label="Q9CQA3 (pp) P19783" source="578" target="645" cy:directed="1"/>
      <edge id="2697" label="Q9CQA3 (pp) Q9D6R2" source="578" target="654" cy:directed="1"/>
      <edge id="2696" label="Q9CQA3 (pp) Q9DC70" source="578" target="618" cy:directed="1"/>
      <edge id="2695" label="Q9CQA3 (pp) Q9CQ69" source="578" target="656" cy:directed="1"/>
      <edge id="2694" label="Q9CQA3 (pp) P17751" source="578" target="593" cy:directed="1"/>
      <edge id="2693" label="Q9CQA3 (pp) P43024" source="578" target="418" cy:directed="1"/>
      <edge id="2692" label="Q9CQA3 (pp) O09111" source="578" target="679" cy:directed="1"/>
      <edge id="2691" label="Q9CQA3 (pp) Q9D3D9" source="578" target="680" cy:directed="1"/>
      <edge id="2690" label="Q9CQA3 (pp) Q99LX0" source="578" target="573" cy:directed="1"/>
      <edge id="2689" label="Q9CQA3 (pp) P19536" source="578" target="517" cy:directed="1"/>
      <edge id="2688" label="Q9CQA3 (pp) P99029" source="578" target="534" cy:directed="1"/>
      <edge id="2687" label="Q9CQA3 (pp) Q9ERS2" source="578" target="551" cy:directed="1"/>
      <edge id="2686" label="Q9CQA3 (pp) Q9CQJ8" source="578" target="620" cy:directed="1"/>
      <edge id="2685" label="Q9CQA3 (pp) P08249" source="578" target="655" cy:directed="1"/>
      <edge id="2684" label="Q9CQA3 (pp) Q60597" source="578" target="379" cy:directed="1"/>
      <edge id="2683" label="P12787 (pp) Q9CR68" source="577" target="623" cy:directed="1"/>
      <edge id="2682" label="P12787 (pp) P52503" source="577" target="538" cy:directed="1"/>
      <edge id="2681" label="P12787 (pp) Q9D6R2" source="577" target="654" cy:directed="1"/>
      <edge id="2680" label="P12787 (pp) Q9DCS9" source="577" target="624" cy:directed="1"/>
      <edge id="2679" label="P12787 (pp) Q99LC5" source="577" target="575" cy:directed="1"/>
      <edge id="2678" label="P12787 (pp) Q9D3D9" source="577" target="680" cy:directed="1"/>
      <edge id="2677" label="P12787 (pp) Q8K3J1" source="577" target="486" cy:directed="1"/>
      <edge id="2676" label="P12787 (pp) Q7TMF3" source="577" target="525" cy:directed="1"/>
      <edge id="2675" label="P12787 (pp) Q8VEM8" source="577" target="541" cy:directed="1"/>
      <edge id="2674" label="P12787 (pp) P17665" source="577" target="335" cy:directed="1"/>
      <edge id="2673" label="P12787 (pp) Q9DC69" source="577" target="483" cy:directed="1"/>
      <edge id="2672" label="P12787 (pp) Q9DCW4" source="577" target="610" cy:directed="1"/>
      <edge id="2671" label="P12787 (pp) P97450" source="577" target="460" cy:directed="1"/>
      <edge id="2670" label="P12787 (pp) Q9DCT2" source="577" target="657" cy:directed="1"/>
      <edge id="2669" label="P12787 (pp) P56391" source="577" target="559" cy:directed="1"/>
      <edge id="2668" label="P12787 (pp) Q9ERS2" source="577" target="551" cy:directed="1"/>
      <edge id="2667" label="P12787 (pp) P19783" source="577" target="645" cy:directed="1"/>
      <edge id="2666" label="P12787 (pp) Q9CQQ7" source="577" target="481" cy:directed="1"/>
      <edge id="2665" label="P12787 (pp) Q9D6J6" source="577" target="683" cy:directed="1"/>
      <edge id="2664" label="P12787 (pp) Q9DB20" source="577" target="651" cy:directed="1"/>
      <edge id="2663" label="P12787 (pp) P00405" source="577" target="221" cy:directed="1"/>
      <edge id="2662" label="P12787 (pp) Q9CQZ5" source="577" target="684" cy:directed="1"/>
      <edge id="2661" label="P12787 (pp) Q9DCJ5" source="577" target="510" cy:directed="1"/>
      <edge id="2660" label="P12787 (pp) Q9D0M3" source="577" target="640" cy:directed="1"/>
      <edge id="2659" label="P12787 (pp) Q9D6J5" source="577" target="403" cy:directed="1"/>
      <edge id="2658" label="P12787 (pp) Q9CQ69" source="577" target="656" cy:directed="1"/>
      <edge id="2657" label="P12787 (pp) Q9CQJ8" source="577" target="620" cy:directed="1"/>
      <edge id="2656" label="P12787 (pp) Q9CPQ1" source="577" target="286" cy:directed="1"/>
      <edge id="2655" label="P12787 (pp) Q9DC70" source="577" target="618" cy:directed="1"/>
      <edge id="2654" label="P12787 (pp) Q9CQ54" source="577" target="658" cy:directed="1"/>
      <edge id="2653" label="P12787 (pp) Q91VR2" source="577" target="627" cy:directed="1"/>
      <edge id="2652" label="P12787 (pp) Q99LC3" source="577" target="639" cy:directed="1"/>
      <edge id="2651" label="P12787 (pp) Q9DCX2" source="577" target="524" cy:directed="1"/>
      <edge id="2650" label="P12787 (pp) Q9CQH3" source="577" target="650" cy:directed="1"/>
      <edge id="2649" label="P12787 (pp) P09671" source="577" target="446" cy:directed="1"/>
      <edge id="2648" label="P12787 (pp) Q03265" source="577" target="678" cy:directed="1"/>
      <edge id="2647" label="P12787 (pp) Q9D855" source="577" target="487" cy:directed="1"/>
      <edge id="2646" label="P12787 (pp) Q9CQA3" source="577" target="578" cy:directed="1"/>
      <edge id="2645" label="P12787 (pp) Q9DB77" source="577" target="485" cy:directed="1"/>
      <edge id="2644" label="P12787 (pp) P43024" source="577" target="418" cy:directed="1"/>
      <edge id="2643" label="P12787 (pp) P19536" source="577" target="517" cy:directed="1"/>
      <edge id="2642" label="P12787 (pp) Q9CQZ6" source="577" target="659" cy:directed="1"/>
      <edge id="2641" label="P12787 (pp) Q9CXZ1" source="577" target="494" cy:directed="1"/>
      <edge id="2640" label="P12787 (pp) Q06185" source="577" target="619" cy:directed="1"/>
      <edge id="2639" label="P12787 (pp) P56480" source="577" target="632" cy:directed="1"/>
      <edge id="2638" label="Q61425 (pp) Q99LC5" source="576" target="575" cy:directed="1"/>
      <edge id="2637" label="Q61425 (pp) Q9WUM5" source="576" target="614" cy:directed="1"/>
      <edge id="2636" label="Q61425 (pp) Q9DBL1" source="576" target="439" cy:directed="1"/>
      <edge id="2635" label="Q61425 (pp) Q9D0K2" source="576" target="613" cy:directed="1"/>
      <edge id="2634" label="Q61425 (pp) Q9CZS1" source="576" target="478" cy:directed="1"/>
      <edge id="2633" label="Q61425 (pp) Q8BMS1" source="576" target="374" cy:directed="1"/>
      <edge id="2632" label="Q61425 (pp) Q9CQ62" source="576" target="605" cy:directed="1"/>
      <edge id="2631" label="Q61425 (pp) Q8BWT1" source="576" target="579" cy:directed="1"/>
      <edge id="2630" label="Q61425 (pp) Q99JY0" source="576" target="506" cy:directed="1"/>
      <edge id="2629" label="Q61425 (pp) O08756" source="576" target="507" cy:directed="1"/>
      <edge id="2628" label="Q61425 (pp) P47738" source="576" target="585" cy:directed="1"/>
      <edge id="2627" label="Q61425 (pp) Q8QZT1" source="576" target="333" cy:directed="1"/>
      <edge id="2626" label="Q61425 (pp) Q9EQ20" source="576" target="528" cy:directed="1"/>
      <edge id="2625" label="Q99LC5 (pp) O09111" source="575" target="679" cy:directed="1"/>
      <edge id="2624" label="Q99LC5 (pp) P50544" source="575" target="431" cy:directed="1"/>
      <edge id="2623" label="Q99LC5 (pp) Q9D6J6" source="575" target="683" cy:directed="1"/>
      <edge id="2622" label="Q99LC5 (pp) Q9DCJ5" source="575" target="510" cy:directed="1"/>
      <edge id="2621" label="Q99LC5 (pp) Q6PB66" source="575" target="392" cy:directed="1"/>
      <edge id="2620" label="Q99LC5 (pp) Q91ZJ5" source="575" target="276" cy:directed="1"/>
      <edge id="2619" label="Q99LC5 (pp) Q9CQH3" source="575" target="650" cy:directed="1"/>
      <edge id="2618" label="Q99LC5 (pp) Q80U28" source="575" target="231" cy:directed="1"/>
      <edge id="2617" label="Q99LC5 (pp) Q91VR2" source="575" target="627" cy:directed="1"/>
      <edge id="2616" label="Q99LC5 (pp) Q9DBL1" source="575" target="439" cy:directed="1"/>
      <edge id="2615" label="Q99LC5 (pp) Q99JY0" source="575" target="506" cy:directed="1"/>
      <edge id="2614" label="Q99LC5 (pp) O08756" source="575" target="507" cy:directed="1"/>
      <edge id="2613" label="Q99LC5 (pp) Q91YT0" source="575" target="511" cy:directed="1"/>
      <edge id="2612" label="Q99LC5 (pp) Q9Z0X1" source="575" target="340" cy:directed="1"/>
      <edge id="2611" label="Q99LC5 (pp) Q8BWT1" source="575" target="579" cy:directed="1"/>
      <edge id="2610" label="Q99LC5 (pp) Q9WUM5" source="575" target="614" cy:directed="1"/>
      <edge id="2609" label="Q99LC5 (pp) Q9CR68" source="575" target="623" cy:directed="1"/>
      <edge id="2608" label="Q99LC5 (pp) O88441" source="575" target="595" cy:directed="1"/>
      <edge id="2607" label="Q99LC5 (pp) Q9DC69" source="575" target="483" cy:directed="1"/>
      <edge id="2606" label="Q8BGH2 (pp) Q99LX0" source="574" target="573" cy:directed="1"/>
      <edge id="2605" label="Q8BGH2 (pp) Q8BH95" source="574" target="642" cy:directed="1"/>
      <edge id="2604" label="Q8BGH2 (pp) Q8CAQ8" source="574" target="337" cy:directed="1"/>
      <edge id="2603" label="Q8BGH2 (pp) Q9CZ13" source="574" target="641" cy:directed="1"/>
      <edge id="2602" label="Q8BGH2 (pp) Q9DC69" source="574" target="483" cy:directed="1"/>
      <edge id="2601" label="Q8BGH2 (pp) Q9QYA2" source="574" target="129" cy:directed="1"/>
      <edge id="2600" label="Q8BGH2 (pp) O88441" source="574" target="595" cy:directed="1"/>
      <edge id="2599" label="Q8BGH2 (pp) P97807" source="574" target="550" cy:directed="1"/>
      <edge id="2598" label="Q8BGH2 (pp) Q9CRB9" source="574" target="240" cy:directed="1"/>
      <edge id="2597" label="Q8BGH2 (pp) Q9DCJ5" source="574" target="510" cy:directed="1"/>
      <edge id="2596" label="Q8BGH2 (pp) Q9WUM5" source="574" target="614" cy:directed="1"/>
      <edge id="2595" label="Q8BGH2 (pp) Q91YT0" source="574" target="511" cy:directed="1"/>
      <edge id="2594" label="Q99LX0 (pp) Q62277" source="573" target="536" cy:directed="1"/>
      <edge id="2593" label="Q99LX0 (pp) O09111" source="573" target="679" cy:directed="1"/>
      <edge id="2592" label="Q99LX0 (pp) Q9D6J6" source="573" target="683" cy:directed="1"/>
      <edge id="2591" label="Q99LX0 (pp) O55042" source="573" target="274" cy:directed="1"/>
      <edge id="2590" label="Q99LX0 (pp) O08756" source="573" target="507" cy:directed="1"/>
      <edge id="2589" label="Q99LX0 (pp) Q91VR2" source="573" target="627" cy:directed="1"/>
      <edge id="2588" label="Q99LX0 (pp) Q9CQH3" source="573" target="650" cy:directed="1"/>
      <edge id="2587" label="P62331 (pp) O70161" source="572" target="582" cy:directed="1"/>
      <edge id="2586" label="Q8K1Z0 (pp) Q9DCJ5" source="571" target="510" cy:directed="1"/>
      <edge id="2585" label="Q8K1Z0 (pp) Q9WUM5" source="571" target="614" cy:directed="1"/>
      <edge id="2584" label="Q8K1Z0 (pp) Q9D6J6" source="571" target="683" cy:directed="1"/>
      <edge id="2583" label="Q8K1Z0 (pp) Q9ERS2" source="571" target="551" cy:directed="1"/>
      <edge id="2582" label="P11499 (pp) P62259" source="570" target="665" cy:directed="1"/>
      <edge id="2581" label="P11499 (pp) Q60864" source="570" target="516" cy:directed="1"/>
      <edge id="2580" label="P11499 (pp) P63038" source="570" target="643" cy:directed="1"/>
      <edge id="2579" label="P11499 (pp) P63037" source="570" target="611" cy:directed="1"/>
      <edge id="2578" label="P11499 (pp) P60710" source="570" target="548" cy:directed="1"/>
      <edge id="2577" label="P11499 (pp) Q9CR16" source="570" target="155" cy:directed="1"/>
      <edge id="2576" label="P05064 (pp) P17710" source="569" target="568" cy:directed="1"/>
      <edge id="2575" label="P05064 (pp) Q9WUA3" source="569" target="380" cy:directed="1"/>
      <edge id="2574" label="P05064 (pp) P17182" source="569" target="375" cy:directed="1"/>
      <edge id="2573" label="P05064 (pp) Q61735" source="569" target="523" cy:directed="1"/>
      <edge id="2572" label="P05064 (pp) P05063" source="569" target="378" cy:directed="1"/>
      <edge id="2571" label="P17710 (pp) Q9WUA3" source="568" target="380" cy:directed="1"/>
      <edge id="2570" label="P48320 (pp) P61922" source="567" target="566" cy:directed="1"/>
      <edge id="2569" label="P48320 (pp) P15105" source="567" target="608" cy:directed="1"/>
      <edge id="2568" label="P61922 (pp) Q9DBF1" source="566" target="408" cy:directed="1"/>
      <edge id="2567" label="P61922 (pp) P15105" source="566" target="608" cy:directed="1"/>
      <edge id="2566" label="P61922 (pp) Q9EQ20" source="566" target="528" cy:directed="1"/>
      <edge id="2565" label="P12023 (pp) P46460" source="565" target="607" cy:directed="1"/>
      <edge id="2564" label="P12023 (pp) Q9WV18" source="565" target="560" cy:directed="1"/>
      <edge id="2563" label="P12023 (pp) P04925" source="565" target="505" cy:directed="1"/>
      <edge id="2562" label="P12023 (pp) P63044" source="565" target="490" cy:directed="1"/>
      <edge id="2561" label="P12023 (pp) P62823" source="565" target="458" cy:directed="1"/>
      <edge id="2560" label="P12023 (pp) Q9CZT8" source="565" target="452" cy:directed="1"/>
      <edge id="2559" label="P12023 (pp) P06837" source="565" target="383" cy:directed="1"/>
      <edge id="2558" label="P12023 (pp) P63011" source="565" target="343" cy:directed="1"/>
      <edge id="2557" label="P12023 (pp) O35526" source="565" target="561" cy:directed="1"/>
      <edge id="2556" label="P12023 (pp) O08756" source="565" target="507" cy:directed="1"/>
      <edge id="2555" label="P12023 (pp) P68254" source="565" target="310" cy:directed="1"/>
      <edge id="2554" label="P12023 (pp) Q8VDN2" source="565" target="406" cy:directed="1"/>
      <edge id="2553" label="P12023 (pp) Q9JHU4" source="565" target="488" cy:directed="1"/>
      <edge id="2552" label="P12023 (pp) Q62277" source="565" target="536" cy:directed="1"/>
      <edge id="2551" label="P12023 (pp) Q9Z1G3" source="565" target="666" cy:directed="1"/>
      <edge id="2550" label="P12023 (pp) Q810U3" source="565" target="229" cy:directed="1"/>
      <edge id="2549" label="P12023 (pp) P62259" source="565" target="665" cy:directed="1"/>
      <edge id="2548" label="P12023 (pp) Q9D6F9" source="565" target="263" cy:directed="1"/>
      <edge id="2547" label="P12023 (pp) Q61548" source="565" target="472" cy:directed="1"/>
      <edge id="2546" label="P12023 (pp) Q60932" source="565" target="284" cy:directed="1"/>
      <edge id="2545" label="P12023 (pp) P35564" source="565" target="203" cy:directed="1"/>
      <edge id="2544" label="P12023 (pp) P56564" source="565" target="222" cy:directed="1"/>
      <edge id="2543" label="P12023 (pp) Q64332" source="565" target="292" cy:directed="1"/>
      <edge id="2542" label="P12023 (pp) O88935" source="565" target="459" cy:directed="1"/>
      <edge id="2541" label="P12023 (pp) P07901" source="565" target="382" cy:directed="1"/>
      <edge id="2540" label="P12023 (pp) P61982" source="565" target="381" cy:directed="1"/>
      <edge id="2539" label="P12023 (pp) O88737" source="565" target="395" cy:directed="1"/>
      <edge id="2538" label="P12023 (pp) P13595" source="565" target="328" cy:directed="1"/>
      <edge id="2537" label="P12023 (pp) Q9JIS5" source="565" target="297" cy:directed="1"/>
      <edge id="2536" label="P12023 (pp) P63101" source="565" target="411" cy:directed="1"/>
      <edge id="2535" label="P12023 (pp) P60710" source="565" target="548" cy:directed="1"/>
      <edge id="2534" label="P12023 (pp) P68510" source="565" target="677" cy:directed="1"/>
      <edge id="2533" label="P12023 (pp) O08599" source="565" target="216" cy:directed="1"/>
      <edge id="2532" label="P12023 (pp) P39053" source="565" target="393" cy:directed="1"/>
      <edge id="2531" label="P12023 (pp) P12960" source="565" target="171" cy:directed="1"/>
      <edge id="2530" label="P12023 (pp) P08551" source="565" target="175" cy:directed="1"/>
      <edge id="2529" label="P12023 (pp) P62821" source="565" target="242" cy:directed="1"/>
      <edge id="2528" label="P12023 (pp) P46096" source="565" target="200" cy:directed="1"/>
      <edge id="2527" label="P12023 (pp) P57780" source="565" target="156" cy:directed="1"/>
      <edge id="2526" label="P12023 (pp) Q91ZZ3" source="565" target="92" cy:directed="1"/>
      <edge id="2525" label="P12023 (pp) P28652" source="565" target="314" cy:directed="1"/>
      <edge id="2524" label="P12023 (pp) O54991" source="565" target="280" cy:directed="1"/>
      <edge id="2523" label="P12023 (pp) Q812A2" source="565" target="90" cy:directed="1"/>
      <edge id="2522" label="P12023 (pp) P46660" source="565" target="489" cy:directed="1"/>
      <edge id="2521" label="P12023 (pp) P60879" source="565" target="509" cy:directed="1"/>
      <edge id="2520" label="P12023 (pp) O55042" source="565" target="274" cy:directed="1"/>
      <edge id="2519" label="P12023 (pp) P97300" source="565" target="146" cy:directed="1"/>
      <edge id="2518" label="P12023 (pp) Q62420" source="565" target="419" cy:directed="1"/>
      <edge id="2517" label="P12023 (pp) P01831" source="565" target="271" cy:directed="1"/>
      <edge id="2516" label="P12023 (pp) Q68FD5" source="565" target="514" cy:directed="1"/>
      <edge id="2515" label="P12023 (pp) Q9Z1G4" source="565" target="615" cy:directed="1"/>
      <edge id="2514" label="P12023 (pp) Q9CQV8" source="565" target="533" cy:directed="1"/>
      <edge id="2513" label="P12023 (pp) Q61316" source="565" target="149" cy:directed="1"/>
      <edge id="2512" label="P12023 (pp) P11627" source="565" target="329" cy:directed="1"/>
      <edge id="2511" label="P12023 (pp) P63017" source="565" target="470" cy:directed="1"/>
      <edge id="2510" label="P12023 (pp) P61264" source="565" target="423" cy:directed="1"/>
      <edge id="2509" label="P62814 (pp) P51863" source="564" target="667" cy:directed="1"/>
      <edge id="2508" label="P62814 (pp) P50516" source="564" target="597" cy:directed="1"/>
      <edge id="2507" label="P62814 (pp) Q8BVE3" source="564" target="520" cy:directed="1"/>
      <edge id="2506" label="P62814 (pp) P57746" source="564" target="598" cy:directed="1"/>
      <edge id="2505" label="P62814 (pp) Q9DC69" source="564" target="483" cy:directed="1"/>
      <edge id="2504" label="P62814 (pp) Q9Z1G3" source="564" target="666" cy:directed="1"/>
      <edge id="2503" label="P62814 (pp) P63082" source="564" target="442" cy:directed="1"/>
      <edge id="2502" label="P62814 (pp) Q91VM9" source="564" target="484" cy:directed="1"/>
      <edge id="2501" label="P62814 (pp) P50518" source="564" target="521" cy:directed="1"/>
      <edge id="2500" label="P62814 (pp) Q9WTT4" source="564" target="401" cy:directed="1"/>
      <edge id="2499" label="P62814 (pp) Q9Z1G4" source="564" target="615" cy:directed="1"/>
      <edge id="2498" label="Q9WV92 (pp) Q8R5M8" source="563" target="562" cy:directed="1"/>
      <edge id="2497" label="Q9WV92 (pp) P12023" source="563" target="565" cy:directed="1"/>
      <edge id="2496" label="Q8R5M8 (pp) O70589" source="562" target="326" cy:directed="1"/>
      <edge id="2495" label="O35526 (pp) Q62442" source="561" target="557" cy:directed="1"/>
      <edge id="2494" label="O35526 (pp) P63040" source="561" target="429" cy:directed="1"/>
      <edge id="2493" label="O35526 (pp) P60879" source="561" target="509" cy:directed="1"/>
      <edge id="2492" label="O35526 (pp) O08599" source="561" target="216" cy:directed="1"/>
      <edge id="2491" label="Q9WV18 (pp) Q80T41" source="560" target="468" cy:directed="1"/>
      <edge id="2490" label="P56391 (pp) O09111" source="559" target="679" cy:directed="1"/>
      <edge id="2489" label="P56391 (pp) Q9D3D9" source="559" target="680" cy:directed="1"/>
      <edge id="2488" label="P56391 (pp) Q9ERS2" source="559" target="551" cy:directed="1"/>
      <edge id="2487" label="P56391 (pp) P00405" source="559" target="221" cy:directed="1"/>
      <edge id="2486" label="P56391 (pp) P17665" source="559" target="335" cy:directed="1"/>
      <edge id="2485" label="P56391 (pp) Q9DCX2" source="559" target="524" cy:directed="1"/>
      <edge id="2484" label="Q9D172 (pp) Q9CQH3" source="558" target="650" cy:directed="1"/>
      <edge id="2483" label="Q9D172 (pp) P97807" source="558" target="550" cy:directed="1"/>
      <edge id="2482" label="Q9D172 (pp) Q91YT0" source="558" target="511" cy:directed="1"/>
      <edge id="2481" label="Q9D172 (pp) Q9CQZ5" source="558" target="684" cy:directed="1"/>
      <edge id="2480" label="Q9D172 (pp) Q9DCT2" source="558" target="657" cy:directed="1"/>
      <edge id="2479" label="Q9D172 (pp) Q9CZ13" source="558" target="641" cy:directed="1"/>
      <edge id="2478" label="Q9D172 (pp) Q91WD5" source="558" target="544" cy:directed="1"/>
      <edge id="2477" label="Q9D172 (pp) Q8BH95" source="558" target="642" cy:directed="1"/>
      <edge id="2476" label="Q9D172 (pp) Q9DCJ5" source="558" target="510" cy:directed="1"/>
      <edge id="2475" label="Q9D172 (pp) P42125" source="558" target="371" cy:directed="1"/>
      <edge id="2474" label="Q9D172 (pp) Q9DC70" source="558" target="618" cy:directed="1"/>
      <edge id="2473" label="Q62442 (pp) P61264" source="557" target="423" cy:directed="1"/>
      <edge id="2472" label="P26443 (pp) Q91Z53" source="556" target="555" cy:directed="1"/>
      <edge id="2471" label="P26443 (pp) Q61425" source="556" target="576" cy:directed="1"/>
      <edge id="2470" label="P26443 (pp) P97807" source="556" target="550" cy:directed="1"/>
      <edge id="2469" label="P26443 (pp) P05202" source="556" target="674" cy:directed="1"/>
      <edge id="2468" label="P26443 (pp) P15105" source="556" target="608" cy:directed="1"/>
      <edge id="2467" label="P26443 (pp) Q9D6R2" source="556" target="654" cy:directed="1"/>
      <edge id="2466" label="P26443 (pp) Q8BH04" source="556" target="266" cy:directed="1"/>
      <edge id="2465" label="P26443 (pp) Q8CHT0" source="556" target="388" cy:directed="1"/>
      <edge id="2464" label="P26443 (pp) P29758" source="556" target="387" cy:directed="1"/>
      <edge id="2463" label="P26443 (pp) P05063" source="556" target="378" cy:directed="1"/>
      <edge id="2462" label="P26443 (pp) Q05920" source="556" target="636" cy:directed="1"/>
      <edge id="2461" label="P26443 (pp) P61922" source="556" target="566" cy:directed="1"/>
      <edge id="2460" label="P26443 (pp) P17751" source="556" target="593" cy:directed="1"/>
      <edge id="2459" label="P26443 (pp) Q60597" source="556" target="379" cy:directed="1"/>
      <edge id="2458" label="P26443 (pp) P70404" source="556" target="596" cy:directed="1"/>
      <edge id="2457" label="P26443 (pp) P56480" source="556" target="632" cy:directed="1"/>
      <edge id="2456" label="P26443 (pp) P63038" source="556" target="643" cy:directed="1"/>
      <edge id="2455" label="P26443 (pp) Q99KI0" source="556" target="552" cy:directed="1"/>
      <edge id="2454" label="P26443 (pp) P48320" source="556" target="567" cy:directed="1"/>
      <edge id="2453" label="P26443 (pp) P54071" source="556" target="653" cy:directed="1"/>
      <edge id="2452" label="P26443 (pp) Q9DCD0" source="556" target="668" cy:directed="1"/>
      <edge id="2451" label="Q91Z53 (pp) P45376" source="555" target="279" cy:directed="1"/>
      <edge id="2450" label="Q99KJ8 (pp) O08788" source="554" target="553" cy:directed="1"/>
      <edge id="2449" label="Q99KJ8 (pp) P28667" source="554" target="273" cy:directed="1"/>
      <edge id="2448" label="O08788 (pp) O35465" source="553" target="444" cy:directed="1"/>
      <edge id="2447" label="Q99KI0 (pp) Q9D2G2" source="552" target="603" cy:directed="1"/>
      <edge id="2446" label="Q99KI0 (pp) Q62351" source="552" target="491" cy:directed="1"/>
      <edge id="2445" label="Q99KI0 (pp) Q91VR2" source="552" target="627" cy:directed="1"/>
      <edge id="2444" label="Q99KI0 (pp) Q9CQH3" source="552" target="650" cy:directed="1"/>
      <edge id="2443" label="Q99KI0 (pp) P17751" source="552" target="593" cy:directed="1"/>
      <edge id="2442" label="Q99KI0 (pp) Q9DC69" source="552" target="483" cy:directed="1"/>
      <edge id="2441" label="Q99KI0 (pp) Q9DB77" source="552" target="485" cy:directed="1"/>
      <edge id="2440" label="Q99KI0 (pp) Q9CZ13" source="552" target="641" cy:directed="1"/>
      <edge id="2439" label="Q99KI0 (pp) P63038" source="552" target="643" cy:directed="1"/>
      <edge id="2438" label="Q99KI0 (pp) P54071" source="552" target="653" cy:directed="1"/>
      <edge id="2437" label="Q99KI0 (pp) P47857" source="552" target="359" cy:directed="1"/>
      <edge id="2436" label="Q99KI0 (pp) P52480" source="552" target="435" cy:directed="1"/>
      <edge id="2435" label="Q99KI0 (pp) Q05920" source="552" target="636" cy:directed="1"/>
      <edge id="2434" label="Q99KI0 (pp) Q9D3D9" source="552" target="680" cy:directed="1"/>
      <edge id="2433" label="Q99KI0 (pp) P70404" source="552" target="596" cy:directed="1"/>
      <edge id="2432" label="Q99KI0 (pp) O09111" source="552" target="679" cy:directed="1"/>
      <edge id="2431" label="Q99KI0 (pp) Q9D6R2" source="552" target="654" cy:directed="1"/>
      <edge id="2430" label="Q99KI0 (pp) Q9ERS2" source="552" target="551" cy:directed="1"/>
      <edge id="2429" label="Q99KI0 (pp) Q91YT0" source="552" target="511" cy:directed="1"/>
      <edge id="2428" label="Q99KI0 (pp) Q9CR68" source="552" target="623" cy:directed="1"/>
      <edge id="2427" label="Q99KI0 (pp) P06745" source="552" target="426" cy:directed="1"/>
      <edge id="2426" label="Q99KI0 (pp) Q9DB20" source="552" target="651" cy:directed="1"/>
      <edge id="2425" label="Q99KI0 (pp) Q9DCJ5" source="552" target="510" cy:directed="1"/>
      <edge id="2424" label="Q99KI0 (pp) Q9D0M3" source="552" target="640" cy:directed="1"/>
      <edge id="2423" label="Q99KI0 (pp) Q9CPP6" source="552" target="609" cy:directed="1"/>
      <edge id="2422" label="Q99KI0 (pp) Q8K1M6" source="552" target="440" cy:directed="1"/>
      <edge id="2421" label="Q99KI0 (pp) P68510" source="552" target="677" cy:directed="1"/>
      <edge id="2420" label="Q99KI0 (pp) Q9WUM5" source="552" target="614" cy:directed="1"/>
      <edge id="2419" label="Q99KI0 (pp) Q60597" source="552" target="379" cy:directed="1"/>
      <edge id="2418" label="Q99KI0 (pp) Q99LX0" source="552" target="573" cy:directed="1"/>
      <edge id="2417" label="Q99KI0 (pp) P35486" source="552" target="451" cy:directed="1"/>
      <edge id="2416" label="Q99KI0 (pp) Q9Z1J3" source="552" target="347" cy:directed="1"/>
      <edge id="2415" label="Q99KI0 (pp) Q03265" source="552" target="678" cy:directed="1"/>
      <edge id="2414" label="Q99KI0 (pp) Q01097" source="552" target="686" cy:directed="1"/>
      <edge id="2413" label="Q99KI0 (pp) P97807" source="552" target="550" cy:directed="1"/>
      <edge id="2412" label="Q99KI0 (pp) P56480" source="552" target="632" cy:directed="1"/>
      <edge id="2411" label="Q99KI0 (pp) P05064" source="552" target="569" cy:directed="1"/>
      <edge id="2410" label="Q99KI0 (pp) Q9D6J6" source="552" target="683" cy:directed="1"/>
      <edge id="2409" label="Q9ERS2 (pp) P50516" source="551" target="597" cy:directed="1"/>
      <edge id="2408" label="Q9ERS2 (pp) Q91VR2" source="551" target="627" cy:directed="1"/>
      <edge id="2407" label="Q9ERS2 (pp) O09111" source="551" target="679" cy:directed="1"/>
      <edge id="2406" label="Q9ERS2 (pp) Q9D6J6" source="551" target="683" cy:directed="1"/>
      <edge id="2405" label="Q9ERS2 (pp) Q9CQH3" source="551" target="650" cy:directed="1"/>
      <edge id="2404" label="P97807 (pp) Q06185" source="550" target="619" cy:directed="1"/>
      <edge id="2403" label="P97807 (pp) P54071" source="550" target="653" cy:directed="1"/>
      <edge id="2402" label="P97807 (pp) Q99LX0" source="550" target="573" cy:directed="1"/>
      <edge id="2401" label="P97807 (pp) Q9D2G2" source="550" target="603" cy:directed="1"/>
      <edge id="2400" label="P97807 (pp) Q9D6R2" source="550" target="654" cy:directed="1"/>
      <edge id="2399" label="P97807 (pp) Q9CQQ7" source="550" target="481" cy:directed="1"/>
      <edge id="2398" label="P97807 (pp) P48771" source="550" target="587" cy:directed="1"/>
      <edge id="2397" label="P97807 (pp) O08756" source="550" target="507" cy:directed="1"/>
      <edge id="2396" label="P97807 (pp) Q9DCD0" source="550" target="668" cy:directed="1"/>
      <edge id="2395" label="P97807 (pp) Q9DCJ5" source="550" target="510" cy:directed="1"/>
      <edge id="2394" label="P97807 (pp) Q9DCS9" source="550" target="624" cy:directed="1"/>
      <edge id="2393" label="P97807 (pp) Q99LC5" source="550" target="575" cy:directed="1"/>
      <edge id="2392" label="P97807 (pp) Q9DC69" source="550" target="483" cy:directed="1"/>
      <edge id="2391" label="P97807 (pp) Q60597" source="550" target="379" cy:directed="1"/>
      <edge id="2390" label="P97807 (pp) Q05920" source="550" target="636" cy:directed="1"/>
      <edge id="2389" label="P97807 (pp) Q91VR2" source="550" target="627" cy:directed="1"/>
      <edge id="2388" label="P97807 (pp) Q91YT0" source="550" target="511" cy:directed="1"/>
      <edge id="2387" label="P97807 (pp) Q8K3J1" source="550" target="486" cy:directed="1"/>
      <edge id="2386" label="P97807 (pp) P06151" source="550" target="652" cy:directed="1"/>
      <edge id="2385" label="P97807 (pp) Q9WUM5" source="550" target="614" cy:directed="1"/>
      <edge id="2384" label="P97807 (pp) Q9D6J6" source="550" target="683" cy:directed="1"/>
      <edge id="2383" label="P97807 (pp) P06745" source="550" target="426" cy:directed="1"/>
      <edge id="2382" label="P97807 (pp) Q8BMF4" source="550" target="637" cy:directed="1"/>
      <edge id="2381" label="P97807 (pp) Q61425" source="550" target="576" cy:directed="1"/>
      <edge id="2380" label="P97807 (pp) Q9CR68" source="550" target="623" cy:directed="1"/>
      <edge id="2379" label="P97807 (pp) Q921G7" source="550" target="580" cy:directed="1"/>
      <edge id="2378" label="P97807 (pp) Q9CQH3" source="550" target="650" cy:directed="1"/>
      <edge id="2377" label="P97807 (pp) Q60931" source="550" target="334" cy:directed="1"/>
      <edge id="2376" label="P97807 (pp) P05202" source="550" target="674" cy:directed="1"/>
      <edge id="2375" label="Q6PHZ2 (pp) P60710" source="549" target="548" cy:directed="1"/>
      <edge id="2374" label="Q6PHZ2 (pp) P99024" source="549" target="323" cy:directed="1"/>
      <edge id="2373" label="Q6PHZ2 (pp) P35436" source="549" target="670" cy:directed="1"/>
      <edge id="2372" label="Q6PHZ2 (pp) P63101" source="549" target="411" cy:directed="1"/>
      <edge id="2371" label="Q6PHZ2 (pp) P68369" source="549" target="542" cy:directed="1"/>
      <edge id="2370" label="P60710 (pp) Q9R0Q6" source="548" target="513" cy:directed="1"/>
      <edge id="2369" label="P60710 (pp) P59999" source="548" target="398" cy:directed="1"/>
      <edge id="2368" label="P60710 (pp) Q9D898" source="548" target="469" cy:directed="1"/>
      <edge id="2367" label="P60710 (pp) P35438" source="548" target="675" cy:directed="1"/>
      <edge id="2366" label="P60710 (pp) P16054" source="548" target="447" cy:directed="1"/>
      <edge id="2365" label="P60710 (pp) Q9CPW4" source="548" target="376" cy:directed="1"/>
      <edge id="2364" label="P60710 (pp) Q9JM76" source="548" target="512" cy:directed="1"/>
      <edge id="2363" label="P60710 (pp) O70589" source="548" target="326" cy:directed="1"/>
      <edge id="2362" label="Q02248 (pp) P05480" source="547" target="546" cy:directed="1"/>
      <edge id="2361" label="Q02248 (pp) Q61301" source="547" target="433" cy:directed="1"/>
      <edge id="2360" label="Q02248 (pp) P35438" source="547" target="675" cy:directed="1"/>
      <edge id="2359" label="Q02248 (pp) P39688" source="547" target="504" cy:directed="1"/>
      <edge id="2358" label="Q02248 (pp) P68510" source="547" target="677" cy:directed="1"/>
      <edge id="2357" label="Q02248 (pp) Q68FH0" source="547" target="142" cy:directed="1"/>
      <edge id="2356" label="Q02248 (pp) O88712" source="547" target="349" cy:directed="1"/>
      <edge id="2355" label="Q02248 (pp) Q01097" source="547" target="686" cy:directed="1"/>
      <edge id="2354" label="Q02248 (pp) P63001" source="547" target="492" cy:directed="1"/>
      <edge id="2353" label="P05480 (pp) P35436" source="546" target="670" cy:directed="1"/>
      <edge id="2352" label="P05480 (pp) P35438" source="546" target="675" cy:directed="1"/>
      <edge id="2351" label="P05480 (pp) P39053" source="546" target="393" cy:directed="1"/>
      <edge id="2350" label="P05480 (pp) P30999" source="546" target="306" cy:directed="1"/>
      <edge id="2349" label="P05480 (pp) P23242" source="546" target="158" cy:directed="1"/>
      <edge id="2348" label="P51881 (pp) P62259" source="545" target="665" cy:directed="1"/>
      <edge id="2347" label="P51881 (pp) P16054" source="545" target="447" cy:directed="1"/>
      <edge id="2346" label="Q91WD5 (pp) Q8K2B3" source="544" target="543" cy:directed="1"/>
      <edge id="2345" label="Q91WD5 (pp) Q9CQZ6" source="544" target="659" cy:directed="1"/>
      <edge id="2344" label="Q91WD5 (pp) Q99MN9" source="544" target="456" cy:directed="1"/>
      <edge id="2343" label="Q91WD5 (pp) Q9DCJ5" source="544" target="510" cy:directed="1"/>
      <edge id="2342" label="Q91WD5 (pp) P08249" source="544" target="655" cy:directed="1"/>
      <edge id="2341" label="Q91WD5 (pp) P70404" source="544" target="596" cy:directed="1"/>
      <edge id="2340" label="Q91WD5 (pp) Q8VEM8" source="544" target="541" cy:directed="1"/>
      <edge id="2339" label="Q91WD5 (pp) Q9D0M3" source="544" target="640" cy:directed="1"/>
      <edge id="2338" label="Q91WD5 (pp) Q99KI0" source="544" target="552" cy:directed="1"/>
      <edge id="2337" label="Q91WD5 (pp) Q99JY0" source="544" target="506" cy:directed="1"/>
      <edge id="2336" label="Q91WD5 (pp) Q91VR2" source="544" target="627" cy:directed="1"/>
      <edge id="2335" label="Q91WD5 (pp) Q9CQ69" source="544" target="656" cy:directed="1"/>
      <edge id="2334" label="Q91WD5 (pp) Q9D855" source="544" target="487" cy:directed="1"/>
      <edge id="2333" label="Q91WD5 (pp) Q9CQH3" source="544" target="650" cy:directed="1"/>
      <edge id="2332" label="Q91WD5 (pp) Q9DC70" source="544" target="618" cy:directed="1"/>
      <edge id="2331" label="Q91WD5 (pp) P97807" source="544" target="550" cy:directed="1"/>
      <edge id="2330" label="Q91WD5 (pp) Q9CQQ7" source="544" target="481" cy:directed="1"/>
      <edge id="2329" label="Q91WD5 (pp) Q99LX0" source="544" target="573" cy:directed="1"/>
      <edge id="2328" label="Q91WD5 (pp) Q99LC3" source="544" target="639" cy:directed="1"/>
      <edge id="2327" label="Q91WD5 (pp) Q9CQZ5" source="544" target="684" cy:directed="1"/>
      <edge id="2326" label="Q91WD5 (pp) P97450" source="544" target="460" cy:directed="1"/>
      <edge id="2325" label="Q91WD5 (pp) Q9CQC7" source="544" target="396" cy:directed="1"/>
      <edge id="2324" label="Q91WD5 (pp) Q9CQJ8" source="544" target="620" cy:directed="1"/>
      <edge id="2323" label="Q91WD5 (pp) Q9DB77" source="544" target="485" cy:directed="1"/>
      <edge id="2322" label="Q91WD5 (pp) Q9CXZ1" source="544" target="494" cy:directed="1"/>
      <edge id="2321" label="Q91WD5 (pp) Q9D6J6" source="544" target="683" cy:directed="1"/>
      <edge id="2320" label="Q91WD5 (pp) Q9DCS9" source="544" target="624" cy:directed="1"/>
      <edge id="2319" label="Q91WD5 (pp) Q9CR68" source="544" target="623" cy:directed="1"/>
      <edge id="2318" label="Q91WD5 (pp) Q3ULD5" source="544" target="540" cy:directed="1"/>
      <edge id="2317" label="Q91WD5 (pp) P20108" source="544" target="463" cy:directed="1"/>
      <edge id="2316" label="Q91WD5 (pp) Q8BGH2" source="544" target="574" cy:directed="1"/>
      <edge id="2315" label="Q91WD5 (pp) Q03265" source="544" target="678" cy:directed="1"/>
      <edge id="2314" label="Q91WD5 (pp) Q7TMF3" source="544" target="525" cy:directed="1"/>
      <edge id="2313" label="Q91WD5 (pp) Q8CAQ8" source="544" target="337" cy:directed="1"/>
      <edge id="2312" label="Q91WD5 (pp) Q6PB66" source="544" target="392" cy:directed="1"/>
      <edge id="2311" label="Q91WD5 (pp) P56480" source="544" target="632" cy:directed="1"/>
      <edge id="2310" label="Q91WD5 (pp) Q8K3J1" source="544" target="486" cy:directed="1"/>
      <edge id="2309" label="Q91WD5 (pp) Q9D6J5" source="544" target="403" cy:directed="1"/>
      <edge id="2308" label="Q91WD5 (pp) Q9CQ75" source="544" target="501" cy:directed="1"/>
      <edge id="2307" label="Q91WD5 (pp) Q9ERS2" source="544" target="551" cy:directed="1"/>
      <edge id="2306" label="Q91WD5 (pp) Q8K1Z0" source="544" target="571" cy:directed="1"/>
      <edge id="2305" label="Q91WD5 (pp) P52503" source="544" target="538" cy:directed="1"/>
      <edge id="2304" label="Q91WD5 (pp) P17751" source="544" target="593" cy:directed="1"/>
      <edge id="2303" label="Q91WD5 (pp) Q8BH95" source="544" target="642" cy:directed="1"/>
      <edge id="2302" label="Q91WD5 (pp) Q99LC5" source="544" target="575" cy:directed="1"/>
      <edge id="2301" label="Q91WD5 (pp) Q9CZ13" source="544" target="641" cy:directed="1"/>
      <edge id="2300" label="Q91WD5 (pp) Q9DB20" source="544" target="651" cy:directed="1"/>
      <edge id="2299" label="Q91WD5 (pp) P09411" source="544" target="592" cy:directed="1"/>
      <edge id="2298" label="Q91WD5 (pp) Q91VD9" source="544" target="625" cy:directed="1"/>
      <edge id="2297" label="Q91WD5 (pp) P35486" source="544" target="451" cy:directed="1"/>
      <edge id="2296" label="Q91WD5 (pp) Q9WUM5" source="544" target="614" cy:directed="1"/>
      <edge id="2295" label="Q91WD5 (pp) Q9DC69" source="544" target="483" cy:directed="1"/>
      <edge id="2294" label="Q91WD5 (pp) Q91YT0" source="544" target="511" cy:directed="1"/>
      <edge id="2293" label="Q91WD5 (pp) Q99LY9" source="544" target="638" cy:directed="1"/>
      <edge id="2292" label="Q91WD5 (pp) Q9CPP6" source="544" target="609" cy:directed="1"/>
      <edge id="2291" label="Q8K2B3 (pp) P97807" source="543" target="550" cy:directed="1"/>
      <edge id="2290" label="Q8K2B3 (pp) Q8JZQ2" source="543" target="497" cy:directed="1"/>
      <edge id="2289" label="Q8K2B3 (pp) Q8VEM8" source="543" target="541" cy:directed="1"/>
      <edge id="2288" label="Q8K2B3 (pp) Q9D0M3" source="543" target="640" cy:directed="1"/>
      <edge id="2287" label="Q8K2B3 (pp) Q91VR2" source="543" target="627" cy:directed="1"/>
      <edge id="2286" label="Q8K2B3 (pp) Q9D2G2" source="543" target="603" cy:directed="1"/>
      <edge id="2285" label="Q8K2B3 (pp) Q9Z0X1" source="543" target="340" cy:directed="1"/>
      <edge id="2284" label="Q8K2B3 (pp) Q9D051" source="543" target="681" cy:directed="1"/>
      <edge id="2283" label="Q8K2B3 (pp) Q03265" source="543" target="678" cy:directed="1"/>
      <edge id="2282" label="Q8K2B3 (pp) P52196" source="543" target="622" cy:directed="1"/>
      <edge id="2281" label="Q8K2B3 (pp) Q9CPP6" source="543" target="609" cy:directed="1"/>
      <edge id="2280" label="Q8K2B3 (pp) Q9CQQ7" source="543" target="481" cy:directed="1"/>
      <edge id="2279" label="Q8K2B3 (pp) Q99KI0" source="543" target="552" cy:directed="1"/>
      <edge id="2278" label="Q8K2B3 (pp) P09411" source="543" target="592" cy:directed="1"/>
      <edge id="2277" label="Q8K2B3 (pp) Q91YT0" source="543" target="511" cy:directed="1"/>
      <edge id="2276" label="Q8K2B3 (pp) Q9Z2I9" source="543" target="432" cy:directed="1"/>
      <edge id="2275" label="Q8K2B3 (pp) P00493" source="543" target="290" cy:directed="1"/>
      <edge id="2274" label="Q8K2B3 (pp) Q60597" source="543" target="379" cy:directed="1"/>
      <edge id="2273" label="Q8K2B3 (pp) P56480" source="543" target="632" cy:directed="1"/>
      <edge id="2272" label="Q8K2B3 (pp) Q9WUM5" source="543" target="614" cy:directed="1"/>
      <edge id="2271" label="Q8K2B3 (pp) Q99LC5" source="543" target="575" cy:directed="1"/>
      <edge id="2270" label="Q8K2B3 (pp) Q9CR68" source="543" target="623" cy:directed="1"/>
      <edge id="2269" label="Q8K2B3 (pp) Q9CZ13" source="543" target="641" cy:directed="1"/>
      <edge id="2268" label="Q8K2B3 (pp) Q9DC69" source="543" target="483" cy:directed="1"/>
      <edge id="2267" label="Q8K2B3 (pp) Q9D6J6" source="543" target="683" cy:directed="1"/>
      <edge id="2266" label="Q8K2B3 (pp) Q9DB77" source="543" target="485" cy:directed="1"/>
      <edge id="2265" label="Q8K2B3 (pp) P35486" source="543" target="451" cy:directed="1"/>
      <edge id="2264" label="Q8K2B3 (pp) Q8K3J1" source="543" target="486" cy:directed="1"/>
      <edge id="2263" label="Q8K2B3 (pp) P63038" source="543" target="643" cy:directed="1"/>
      <edge id="2262" label="Q8K2B3 (pp) Q9D6R2" source="543" target="654" cy:directed="1"/>
      <edge id="2261" label="Q8K2B3 (pp) Q91VD9" source="543" target="625" cy:directed="1"/>
      <edge id="2260" label="Q8K2B3 (pp) P17751" source="543" target="593" cy:directed="1"/>
      <edge id="2259" label="Q8K2B3 (pp) P58281" source="543" target="226" cy:directed="1"/>
      <edge id="2258" label="Q8K2B3 (pp) Q99JY0" source="543" target="506" cy:directed="1"/>
      <edge id="2257" label="P68369 (pp) P39053" source="542" target="393" cy:directed="1"/>
      <edge id="2256" label="P68369 (pp) P27546" source="542" target="225" cy:directed="1"/>
      <edge id="2255" label="P68369 (pp) P63101" source="542" target="411" cy:directed="1"/>
      <edge id="2254" label="P68369 (pp) P35438" source="542" target="675" cy:directed="1"/>
      <edge id="2253" label="P68369 (pp) P60879" source="542" target="509" cy:directed="1"/>
      <edge id="2252" label="Q8VEM8 (pp) Q9D6J6" source="541" target="683" cy:directed="1"/>
      <edge id="2251" label="Q8VEM8 (pp) Q9CQH3" source="541" target="650" cy:directed="1"/>
      <edge id="2250" label="Q8VEM8 (pp) Q9CQQ7" source="541" target="481" cy:directed="1"/>
      <edge id="2249" label="Q8VEM8 (pp) Q9D3D9" source="541" target="680" cy:directed="1"/>
      <edge id="2248" label="Q3ULD5 (pp) Q8R4N0" source="540" target="539" cy:directed="1"/>
      <edge id="2247" label="Q3ULD5 (pp) Q99MN9" source="540" target="456" cy:directed="1"/>
      <edge id="2246" label="Q3ULD5 (pp) Q9JHI5" source="540" target="437" cy:directed="1"/>
      <edge id="2245" label="Q3ULD5 (pp) Q921G7" source="540" target="580" cy:directed="1"/>
      <edge id="2244" label="Q3ULD5 (pp) Q8BMS1" source="540" target="374" cy:directed="1"/>
      <edge id="2243" label="Q3ULD5 (pp) Q8BH95" source="540" target="642" cy:directed="1"/>
      <edge id="2242" label="Q3ULD5 (pp) Q91ZA3" source="540" target="413" cy:directed="1"/>
      <edge id="2241" label="Q3ULD5 (pp) Q99MR8" source="540" target="265" cy:directed="1"/>
      <edge id="2240" label="Q3ULD5 (pp) Q9D0K2" source="540" target="613" cy:directed="1"/>
      <edge id="2239" label="Q3ULD5 (pp) Q05920" source="540" target="636" cy:directed="1"/>
      <edge id="2238" label="Q8R4N0 (pp) Q91ZA3" source="539" target="413" cy:directed="1"/>
      <edge id="2237" label="Q8R4N0 (pp) Q99MR8" source="539" target="265" cy:directed="1"/>
      <edge id="2236" label="Q8R4N0 (pp) P05480" source="539" target="546" cy:directed="1"/>
      <edge id="2235" label="Q8R4N0 (pp) Q9WUM5" source="539" target="614" cy:directed="1"/>
      <edge id="2234" label="Q8R4N0 (pp) Q99LC5" source="539" target="575" cy:directed="1"/>
      <edge id="2233" label="P52503 (pp) Q9D6J6" source="538" target="683" cy:directed="1"/>
      <edge id="2232" label="P52503 (pp) P48771" source="538" target="587" cy:directed="1"/>
      <edge id="2231" label="P52503 (pp) Q9CQZ6" source="538" target="659" cy:directed="1"/>
      <edge id="2230" label="P52503 (pp) Q91YT0" source="538" target="511" cy:directed="1"/>
      <edge id="2229" label="P52503 (pp) Q9CZ13" source="538" target="641" cy:directed="1"/>
      <edge id="2228" label="P52503 (pp) Q91VD9" source="538" target="625" cy:directed="1"/>
      <edge id="2227" label="P52503 (pp) Q9CQZ5" source="538" target="684" cy:directed="1"/>
      <edge id="2226" label="P52503 (pp) P42125" source="538" target="371" cy:directed="1"/>
      <edge id="2225" label="P52503 (pp) P43024" source="538" target="418" cy:directed="1"/>
      <edge id="2224" label="P52503 (pp) P62073" source="538" target="535" cy:directed="1"/>
      <edge id="2223" label="P52503 (pp) Q9DC69" source="538" target="483" cy:directed="1"/>
      <edge id="2222" label="P52503 (pp) Q8K3J1" source="538" target="486" cy:directed="1"/>
      <edge id="2221" label="P52503 (pp) Q9CQQ7" source="538" target="481" cy:directed="1"/>
      <edge id="2220" label="P52503 (pp) Q9CQJ8" source="538" target="620" cy:directed="1"/>
      <edge id="2219" label="P52503 (pp) Q9CQH3" source="538" target="650" cy:directed="1"/>
      <edge id="2218" label="P52503 (pp) Q9CR68" source="538" target="623" cy:directed="1"/>
      <edge id="2217" label="P52503 (pp) P56391" source="538" target="559" cy:directed="1"/>
      <edge id="2216" label="P52503 (pp) Q9DB20" source="538" target="651" cy:directed="1"/>
      <edge id="2215" label="P52503 (pp) Q99LC3" source="538" target="639" cy:directed="1"/>
      <edge id="2214" label="P52503 (pp) P97450" source="538" target="460" cy:directed="1"/>
      <edge id="2213" label="P52503 (pp) Q99LX0" source="538" target="573" cy:directed="1"/>
      <edge id="2212" label="P52503 (pp) Q9DCJ5" source="538" target="510" cy:directed="1"/>
      <edge id="2211" label="P52503 (pp) Q9CXZ1" source="538" target="494" cy:directed="1"/>
      <edge id="2210" label="P52503 (pp) Q9D0M3" source="538" target="640" cy:directed="1"/>
      <edge id="2209" label="P52503 (pp) Q9CQC7" source="538" target="396" cy:directed="1"/>
      <edge id="2208" label="P52503 (pp) Q9D6J5" source="538" target="403" cy:directed="1"/>
      <edge id="2207" label="P52503 (pp) P99029" source="538" target="534" cy:directed="1"/>
      <edge id="2206" label="P52503 (pp) Q9ERS2" source="538" target="551" cy:directed="1"/>
      <edge id="2205" label="P52503 (pp) Q06185" source="538" target="619" cy:directed="1"/>
      <edge id="2204" label="P52503 (pp) Q9CQ54" source="538" target="658" cy:directed="1"/>
      <edge id="2203" label="P52503 (pp) P17665" source="538" target="335" cy:directed="1"/>
      <edge id="2202" label="P52503 (pp) Q9CPP6" source="538" target="609" cy:directed="1"/>
      <edge id="2201" label="P52503 (pp) Q99LY9" source="538" target="638" cy:directed="1"/>
      <edge id="2200" label="P52503 (pp) Q9DCS9" source="538" target="624" cy:directed="1"/>
      <edge id="2199" label="P52503 (pp) Q9D3D9" source="538" target="680" cy:directed="1"/>
      <edge id="2198" label="P52503 (pp) O08756" source="538" target="507" cy:directed="1"/>
      <edge id="2197" label="P52503 (pp) O09111" source="538" target="679" cy:directed="1"/>
      <edge id="2196" label="P52503 (pp) Q9CQ69" source="538" target="656" cy:directed="1"/>
      <edge id="2195" label="P52503 (pp) Q9Z1P6" source="538" target="591" cy:directed="1"/>
      <edge id="2194" label="Q60631 (pp) Q62277" source="537" target="536" cy:directed="1"/>
      <edge id="2193" label="Q60631 (pp) Q62420" source="537" target="419" cy:directed="1"/>
      <edge id="2192" label="Q60631 (pp) P18052" source="537" target="476" cy:directed="1"/>
      <edge id="2191" label="Q60631 (pp) P04925" source="537" target="505" cy:directed="1"/>
      <edge id="2190" label="Q60631 (pp) P20444" source="537" target="214" cy:directed="1"/>
      <edge id="2189" label="Q60631 (pp) P12023" source="537" target="565" cy:directed="1"/>
      <edge id="2188" label="Q60631 (pp) O08585" source="537" target="283" cy:directed="1"/>
      <edge id="2187" label="Q60631 (pp) P05480" source="537" target="546" cy:directed="1"/>
      <edge id="2186" label="Q60631 (pp) Q8CHC4" source="537" target="251" cy:directed="1"/>
      <edge id="2185" label="Q60631 (pp) P39053" source="537" target="393" cy:directed="1"/>
      <edge id="2184" label="Q60631 (pp) Q68FD5" source="537" target="514" cy:directed="1"/>
      <edge id="2183" label="Q62277 (pp) P60879" source="536" target="509" cy:directed="1"/>
      <edge id="2182" label="Q62277 (pp) P62204" source="536" target="311" cy:directed="1"/>
      <edge id="2181" label="Q62277 (pp) P46096" source="536" target="200" cy:directed="1"/>
      <edge id="2180" label="Q62277 (pp) P63044" source="536" target="490" cy:directed="1"/>
      <edge id="2179" label="Q62277 (pp) P01831" source="536" target="271" cy:directed="1"/>
      <edge id="2178" label="Q62277 (pp) P43006" source="536" target="117" cy:directed="1"/>
      <edge id="2177" label="P62073 (pp) P99029" source="535" target="534" cy:directed="1"/>
      <edge id="2176" label="P62073 (pp) O08756" source="535" target="507" cy:directed="1"/>
      <edge id="2175" label="P62073 (pp) Q9ERS2" source="535" target="551" cy:directed="1"/>
      <edge id="2174" label="P62073 (pp) Q925I1" source="535" target="301" cy:directed="1"/>
      <edge id="2173" label="P62073 (pp) Q9DCJ5" source="535" target="510" cy:directed="1"/>
      <edge id="2172" label="P62073 (pp) P56391" source="535" target="559" cy:directed="1"/>
      <edge id="2171" label="P62073 (pp) O35658" source="535" target="526" cy:directed="1"/>
      <edge id="2170" label="P62073 (pp) Q9CR68" source="535" target="623" cy:directed="1"/>
      <edge id="2169" label="P62073 (pp) Q9D3D9" source="535" target="680" cy:directed="1"/>
      <edge id="2168" label="P62073 (pp) Q9DCS9" source="535" target="624" cy:directed="1"/>
      <edge id="2167" label="P62073 (pp) P67778" source="535" target="629" cy:directed="1"/>
      <edge id="2166" label="P62073 (pp) Q9D6J6" source="535" target="683" cy:directed="1"/>
      <edge id="2165" label="P62073 (pp) Q9CQH3" source="535" target="650" cy:directed="1"/>
      <edge id="2164" label="P99029 (pp) Q9D6J6" source="534" target="683" cy:directed="1"/>
      <edge id="2163" label="Q9CQV8 (pp) P62259" source="533" target="665" cy:directed="1"/>
      <edge id="2162" label="Q9CQV8 (pp) P63101" source="533" target="411" cy:directed="1"/>
      <edge id="2161" label="Q9CQV8 (pp) P16054" source="533" target="447" cy:directed="1"/>
      <edge id="2160" label="Q9CQV8 (pp) Q64010" source="533" target="461" cy:directed="1"/>
      <edge id="2159" label="Q9CQV8 (pp) P10637" source="533" target="356" cy:directed="1"/>
      <edge id="2158" label="Q9CQR4 (pp) Q9CQH3" source="532" target="650" cy:directed="1"/>
      <edge id="2157" label="Q9CQR4 (pp) P97450" source="532" target="460" cy:directed="1"/>
      <edge id="2156" label="Q9CQR4 (pp) Q9D6J6" source="532" target="683" cy:directed="1"/>
      <edge id="2155" label="Q9CQR4 (pp) Q9DCD0" source="532" target="668" cy:directed="1"/>
      <edge id="2154" label="Q9CQR4 (pp) Q9CQZ6" source="532" target="659" cy:directed="1"/>
      <edge id="2153" label="Q9CQR4 (pp) Q9CQZ5" source="532" target="684" cy:directed="1"/>
      <edge id="2152" label="Q9CQR4 (pp) Q9DCJ5" source="532" target="510" cy:directed="1"/>
      <edge id="2151" label="Q9CQR4 (pp) Q99LC5" source="532" target="575" cy:directed="1"/>
      <edge id="2150" label="Q9CQR4 (pp) Q61425" source="532" target="576" cy:directed="1"/>
      <edge id="2149" label="P40142 (pp) P09411" source="531" target="592" cy:directed="1"/>
      <edge id="2148" label="P40142 (pp) Q9DCD0" source="531" target="668" cy:directed="1"/>
      <edge id="2147" label="P40142 (pp) P06745" source="531" target="426" cy:directed="1"/>
      <edge id="2146" label="P40142 (pp) Q93092" source="531" target="436" cy:directed="1"/>
      <edge id="2145" label="P40142 (pp) P16858" source="531" target="331" cy:directed="1"/>
      <edge id="2144" label="P40142 (pp) Q60597" source="531" target="379" cy:directed="1"/>
      <edge id="2143" label="P40142 (pp) P52480" source="531" target="435" cy:directed="1"/>
      <edge id="2142" label="P40142 (pp) P17751" source="531" target="593" cy:directed="1"/>
      <edge id="2141" label="P40142 (pp) P05064" source="531" target="569" cy:directed="1"/>
      <edge id="2140" label="P40142 (pp) P06151" source="531" target="652" cy:directed="1"/>
      <edge id="2139" label="P40142 (pp) P17182" source="531" target="375" cy:directed="1"/>
      <edge id="2138" label="P40142 (pp) P35486" source="531" target="451" cy:directed="1"/>
      <edge id="2137" label="P40142 (pp) Q9D0F9" source="531" target="255" cy:directed="1"/>
      <edge id="2136" label="P40142 (pp) P05063" source="531" target="378" cy:directed="1"/>
      <edge id="2135" label="P63213 (pp) P62874" source="530" target="529" cy:directed="1"/>
      <edge id="2134" label="P63213 (pp) P18872" source="530" target="500" cy:directed="1"/>
      <edge id="2133" label="P62874 (pp) P04925" source="529" target="505" cy:directed="1"/>
      <edge id="2132" label="Q99KR7 (pp) O35658" source="527" target="526" cy:directed="1"/>
      <edge id="2131" label="Q99KR7 (pp) P56480" source="527" target="632" cy:directed="1"/>
      <edge id="2130" label="O35658 (pp) P40630" source="526" target="296" cy:directed="1"/>
      <edge id="2129" label="O35658 (pp) Q9CQQ7" source="526" target="481" cy:directed="1"/>
      <edge id="2128" label="Q7TMF3 (pp) Q9DCX2" source="525" target="524" cy:directed="1"/>
      <edge id="2127" label="Q7TMF3 (pp) Q9CXZ1" source="525" target="494" cy:directed="1"/>
      <edge id="2126" label="Q7TMF3 (pp) O09111" source="525" target="679" cy:directed="1"/>
      <edge id="2125" label="Q7TMF3 (pp) Q9CR68" source="525" target="623" cy:directed="1"/>
      <edge id="2124" label="Q7TMF3 (pp) Q9CQ54" source="525" target="658" cy:directed="1"/>
      <edge id="2123" label="Q7TMF3 (pp) Q9DC69" source="525" target="483" cy:directed="1"/>
      <edge id="2122" label="Q7TMF3 (pp) Q62425" source="525" target="345" cy:directed="1"/>
      <edge id="2121" label="Q7TMF3 (pp) Q9D0M3" source="525" target="640" cy:directed="1"/>
      <edge id="2120" label="Q7TMF3 (pp) P97450" source="525" target="460" cy:directed="1"/>
      <edge id="2119" label="Q7TMF3 (pp) P52503" source="525" target="538" cy:directed="1"/>
      <edge id="2118" label="Q7TMF3 (pp) Q9D855" source="525" target="487" cy:directed="1"/>
      <edge id="2117" label="Q7TMF3 (pp) Q9DC70" source="525" target="618" cy:directed="1"/>
      <edge id="2116" label="Q7TMF3 (pp) Q9DCS9" source="525" target="624" cy:directed="1"/>
      <edge id="2115" label="Q7TMF3 (pp) Q9CQZ5" source="525" target="684" cy:directed="1"/>
      <edge id="2114" label="Q7TMF3 (pp) Q9CQQ7" source="525" target="481" cy:directed="1"/>
      <edge id="2113" label="Q7TMF3 (pp) Q9Z1P6" source="525" target="591" cy:directed="1"/>
      <edge id="2112" label="Q7TMF3 (pp) Q9DCJ5" source="525" target="510" cy:directed="1"/>
      <edge id="2111" label="Q7TMF3 (pp) Q9CQZ6" source="525" target="659" cy:directed="1"/>
      <edge id="2110" label="Q7TMF3 (pp) Q3UIU2" source="525" target="602" cy:directed="1"/>
      <edge id="2109" label="Q7TMF3 (pp) Q9ERS2" source="525" target="551" cy:directed="1"/>
      <edge id="2108" label="Q7TMF3 (pp) Q9CQJ8" source="525" target="620" cy:directed="1"/>
      <edge id="2107" label="Q7TMF3 (pp) Q9D6J5" source="525" target="403" cy:directed="1"/>
      <edge id="2106" label="Q7TMF3 (pp) Q99LY9" source="525" target="638" cy:directed="1"/>
      <edge id="2105" label="Q7TMF3 (pp) Q8K3J1" source="525" target="486" cy:directed="1"/>
      <edge id="2104" label="Q7TMF3 (pp) Q9CQC7" source="525" target="396" cy:directed="1"/>
      <edge id="2103" label="Q7TMF3 (pp) Q9CQH3" source="525" target="650" cy:directed="1"/>
      <edge id="2102" label="Q7TMF3 (pp) Q9D3D9" source="525" target="680" cy:directed="1"/>
      <edge id="2101" label="Q7TMF3 (pp) Q9D6J6" source="525" target="683" cy:directed="1"/>
      <edge id="2100" label="Q7TMF3 (pp) Q9CQ69" source="525" target="656" cy:directed="1"/>
      <edge id="2099" label="Q7TMF3 (pp) Q91YT0" source="525" target="511" cy:directed="1"/>
      <edge id="2098" label="Q7TMF3 (pp) Q91VD9" source="525" target="625" cy:directed="1"/>
      <edge id="2097" label="Q7TMF3 (pp) Q99LC3" source="525" target="639" cy:directed="1"/>
      <edge id="2096" label="Q9DCX2 (pp) Q9ERS2" source="524" target="551" cy:directed="1"/>
      <edge id="2095" label="Q9DCX2 (pp) Q99LX0" source="524" target="573" cy:directed="1"/>
      <edge id="2094" label="Q9DCX2 (pp) Q91VR2" source="524" target="627" cy:directed="1"/>
      <edge id="2093" label="Q9DCX2 (pp) Q9CQQ7" source="524" target="481" cy:directed="1"/>
      <edge id="2092" label="Q9DCX2 (pp) Q9D6J6" source="524" target="683" cy:directed="1"/>
      <edge id="2091" label="Q9DCX2 (pp) Q9CQH3" source="524" target="650" cy:directed="1"/>
      <edge id="2090" label="Q9DCX2 (pp) Q9D3D9" source="524" target="680" cy:directed="1"/>
      <edge id="2089" label="Q9DCX2 (pp) Q99LY9" source="524" target="638" cy:directed="1"/>
      <edge id="2088" label="Q61735 (pp) P97797" source="523" target="522" cy:directed="1"/>
      <edge id="2087" label="P50518 (pp) Q8BVE3" source="521" target="520" cy:directed="1"/>
      <edge id="2086" label="P50518 (pp) Q9Z1G4" source="521" target="615" cy:directed="1"/>
      <edge id="2085" label="P50518 (pp) P63082" source="521" target="442" cy:directed="1"/>
      <edge id="2084" label="P50518 (pp) P57746" source="521" target="598" cy:directed="1"/>
      <edge id="2083" label="P50518 (pp) Q9WTT4" source="521" target="401" cy:directed="1"/>
      <edge id="2082" label="P50518 (pp) Q9Z1G3" source="521" target="666" cy:directed="1"/>
      <edge id="2081" label="P50518 (pp) P50516" source="521" target="597" cy:directed="1"/>
      <edge id="2080" label="Q8BVE3 (pp) P45878" source="520" target="471" cy:directed="1"/>
      <edge id="2079" label="Q8BVE3 (pp) Q9Z1G4" source="520" target="615" cy:directed="1"/>
      <edge id="2078" label="Q8BVE3 (pp) P63082" source="520" target="442" cy:directed="1"/>
      <edge id="2077" label="Q8BVE3 (pp) P50516" source="520" target="597" cy:directed="1"/>
      <edge id="2076" label="Q8BVE3 (pp) Q9DC69" source="520" target="483" cy:directed="1"/>
      <edge id="2075" label="Q9JLB0 (pp) Q99N28" source="519" target="518" cy:directed="1"/>
      <edge id="2074" label="Q9JLB0 (pp) Q8R5M8" source="519" target="562" cy:directed="1"/>
      <edge id="2073" label="Q9JLB0 (pp) O70318" source="519" target="293" cy:directed="1"/>
      <edge id="2072" label="P19536 (pp) Q9CR68" source="517" target="623" cy:directed="1"/>
      <edge id="2071" label="P19536 (pp) Q9D3D9" source="517" target="680" cy:directed="1"/>
      <edge id="2070" label="P19536 (pp) P56391" source="517" target="559" cy:directed="1"/>
      <edge id="2069" label="P19536 (pp) Q9CQ69" source="517" target="656" cy:directed="1"/>
      <edge id="2068" label="P19536 (pp) Q9CQH3" source="517" target="650" cy:directed="1"/>
      <edge id="2067" label="P19536 (pp) Q91VR2" source="517" target="627" cy:directed="1"/>
      <edge id="2066" label="P19536 (pp) P00405" source="517" target="221" cy:directed="1"/>
      <edge id="2065" label="Q60864 (pp) Q9QYJ0" source="516" target="515" cy:directed="1"/>
      <edge id="2064" label="Q60864 (pp) P17156" source="516" target="312" cy:directed="1"/>
      <edge id="2063" label="Q60864 (pp) P63037" source="516" target="611" cy:directed="1"/>
      <edge id="2062" label="Q60864 (pp) Q61699" source="516" target="172" cy:directed="1"/>
      <edge id="2061" label="Q60864 (pp) P48722" source="516" target="188" cy:directed="1"/>
      <edge id="2060" label="Q60864 (pp) Q9CR16" source="516" target="155" cy:directed="1"/>
      <edge id="2059" label="Q60864 (pp) P04925" source="516" target="505" cy:directed="1"/>
      <edge id="2058" label="Q60864 (pp) P63038" source="516" target="643" cy:directed="1"/>
      <edge id="2057" label="Q68FD5 (pp) P62259" source="514" target="665" cy:directed="1"/>
      <edge id="2056" label="Q68FD5 (pp) Q61548" source="514" target="472" cy:directed="1"/>
      <edge id="2055" label="Q68FD5 (pp) Q8CHU3" source="514" target="399" cy:directed="1"/>
      <edge id="2054" label="Q68FD5 (pp) Q01097" source="514" target="686" cy:directed="1"/>
      <edge id="2053" label="Q68FD5 (pp) Q8CHC4" source="514" target="251" cy:directed="1"/>
      <edge id="2052" label="Q68FD5 (pp) P62743" source="514" target="233" cy:directed="1"/>
      <edge id="2051" label="Q68FD5 (pp) O08585" source="514" target="283" cy:directed="1"/>
      <edge id="2050" label="Q68FD5 (pp) O70589" source="514" target="326" cy:directed="1"/>
      <edge id="2049" label="Q68FD5 (pp) Q9Z0R4" source="514" target="289" cy:directed="1"/>
      <edge id="2048" label="Q68FD5 (pp) Q80TZ3" source="514" target="165" cy:directed="1"/>
      <edge id="2047" label="Q68FD5 (pp) O35643" source="514" target="211" cy:directed="1"/>
      <edge id="2046" label="Q68FD5 (pp) Q80VP1" source="514" target="258" cy:directed="1"/>
      <edge id="2045" label="Q68FD5 (pp) P63101" source="514" target="411" cy:directed="1"/>
      <edge id="2044" label="Q68FD5 (pp) Q6IRU5" source="514" target="353" cy:directed="1"/>
      <edge id="2043" label="Q68FD5 (pp) P35438" source="514" target="675" cy:directed="1"/>
      <edge id="2042" label="Q68FD5 (pp) P62962" source="514" target="448" cy:directed="1"/>
      <edge id="2041" label="Q68FD5 (pp) Q62420" source="514" target="419" cy:directed="1"/>
      <edge id="2040" label="Q68FD5 (pp) P17426" source="514" target="599" cy:directed="1"/>
      <edge id="2039" label="Q9R0Q6 (pp) Q9JM76" source="513" target="512" cy:directed="1"/>
      <edge id="2038" label="Q9R0Q6 (pp) P59999" source="513" target="398" cy:directed="1"/>
      <edge id="2037" label="Q9R0Q6 (pp) Q9CPW4" source="513" target="376" cy:directed="1"/>
      <edge id="2036" label="Q9JM76 (pp) Q9D898" source="512" target="469" cy:directed="1"/>
      <edge id="2035" label="Q9JM76 (pp) P68510" source="512" target="677" cy:directed="1"/>
      <edge id="2034" label="Q9JM76 (pp) P59999" source="512" target="398" cy:directed="1"/>
      <edge id="2033" label="Q91YT0 (pp) Q06185" source="511" target="619" cy:directed="1"/>
      <edge id="2032" label="Q91YT0 (pp) Q9CQH3" source="511" target="650" cy:directed="1"/>
      <edge id="2031" label="Q91YT0 (pp) Q9D6J6" source="511" target="683" cy:directed="1"/>
      <edge id="2030" label="Q91YT0 (pp) P70404" source="511" target="596" cy:directed="1"/>
      <edge id="2029" label="Q91YT0 (pp) Q9DC69" source="511" target="483" cy:directed="1"/>
      <edge id="2028" label="Q91YT0 (pp) Q9DCX2" source="511" target="524" cy:directed="1"/>
      <edge id="2027" label="Q91YT0 (pp) Q9CQQ7" source="511" target="481" cy:directed="1"/>
      <edge id="2026" label="Q91YT0 (pp) Q9CR68" source="511" target="623" cy:directed="1"/>
      <edge id="2025" label="Q91YT0 (pp) Q60597" source="511" target="379" cy:directed="1"/>
      <edge id="2024" label="Q91YT0 (pp) Q9ERS2" source="511" target="551" cy:directed="1"/>
      <edge id="2023" label="Q91YT0 (pp) Q9D3D9" source="511" target="680" cy:directed="1"/>
      <edge id="2022" label="Q91YT0 (pp) Q9DCS9" source="511" target="624" cy:directed="1"/>
      <edge id="2021" label="Q91YT0 (pp) Q9D2G2" source="511" target="603" cy:directed="1"/>
      <edge id="2020" label="Q91YT0 (pp) Q3UIU2" source="511" target="602" cy:directed="1"/>
      <edge id="2019" label="Q91YT0 (pp) Q91VR2" source="511" target="627" cy:directed="1"/>
      <edge id="2018" label="Q91YT0 (pp) Q8K3J1" source="511" target="486" cy:directed="1"/>
      <edge id="2017" label="Q91YT0 (pp) O09111" source="511" target="679" cy:directed="1"/>
      <edge id="2016" label="Q91YT0 (pp) Q9CQ69" source="511" target="656" cy:directed="1"/>
      <edge id="2015" label="Q91YT0 (pp) Q99LX0" source="511" target="573" cy:directed="1"/>
      <edge id="2014" label="Q91YT0 (pp) Q9DCJ5" source="511" target="510" cy:directed="1"/>
      <edge id="2013" label="Q91YT0 (pp) Q8CAQ8" source="511" target="337" cy:directed="1"/>
      <edge id="2012" label="Q91YT0 (pp) Q9WUM5" source="511" target="614" cy:directed="1"/>
      <edge id="2011" label="Q9DCJ5 (pp) P50516" source="510" target="597" cy:directed="1"/>
      <edge id="2010" label="Q9DCJ5 (pp) Q8K3J1" source="510" target="486" cy:directed="1"/>
      <edge id="2009" label="Q9DCJ5 (pp) Q3UIU2" source="510" target="602" cy:directed="1"/>
      <edge id="2008" label="Q9DCJ5 (pp) Q9D3D9" source="510" target="680" cy:directed="1"/>
      <edge id="2007" label="Q9DCJ5 (pp) Q9DC69" source="510" target="483" cy:directed="1"/>
      <edge id="2006" label="Q9DCJ5 (pp) Q9CQQ7" source="510" target="481" cy:directed="1"/>
      <edge id="2005" label="Q9DCJ5 (pp) Q9ERS2" source="510" target="551" cy:directed="1"/>
      <edge id="2004" label="Q9DCJ5 (pp) Q9CPQ8" source="510" target="626" cy:directed="1"/>
      <edge id="2003" label="Q9DCJ5 (pp) Q9CQH3" source="510" target="650" cy:directed="1"/>
      <edge id="2002" label="Q9DCJ5 (pp) Q9DCX2" source="510" target="524" cy:directed="1"/>
      <edge id="2001" label="Q9DCJ5 (pp) P67778" source="510" target="629" cy:directed="1"/>
      <edge id="2000" label="Q9DCJ5 (pp) Q99LX0" source="510" target="573" cy:directed="1"/>
      <edge id="1999" label="Q9DCJ5 (pp) O08756" source="510" target="507" cy:directed="1"/>
      <edge id="1998" label="Q9DCJ5 (pp) P99029" source="510" target="534" cy:directed="1"/>
      <edge id="1997" label="Q9DCJ5 (pp) Q9D6J6" source="510" target="683" cy:directed="1"/>
      <edge id="1996" label="Q9DCJ5 (pp) Q91VR2" source="510" target="627" cy:directed="1"/>
      <edge id="1995" label="Q9DCJ5 (pp) Q99LY9" source="510" target="638" cy:directed="1"/>
      <edge id="1994" label="Q9DCJ5 (pp) P56391" source="510" target="559" cy:directed="1"/>
      <edge id="1993" label="Q9DCJ5 (pp) O09111" source="510" target="679" cy:directed="1"/>
      <edge id="1992" label="P60879 (pp) P28660" source="509" target="508" cy:directed="1"/>
      <edge id="1991" label="P60879 (pp) P06837" source="509" target="383" cy:directed="1"/>
      <edge id="1990" label="P60879 (pp) P51863" source="509" target="667" cy:directed="1"/>
      <edge id="1989" label="P60879 (pp) P63044" source="509" target="490" cy:directed="1"/>
      <edge id="1988" label="P60879 (pp) P47708" source="509" target="236" cy:directed="1"/>
      <edge id="1987" label="P60879 (pp) Q62442" source="509" target="557" cy:directed="1"/>
      <edge id="1986" label="P60879 (pp) P17426" source="509" target="599" cy:directed="1"/>
      <edge id="1985" label="P60879 (pp) P46096" source="509" target="200" cy:directed="1"/>
      <edge id="1984" label="P60879 (pp) Q9QWI6" source="509" target="410" cy:directed="1"/>
      <edge id="1983" label="P60879 (pp) P16858" source="509" target="331" cy:directed="1"/>
      <edge id="1982" label="P60879 (pp) P68368" source="509" target="358" cy:directed="1"/>
      <edge id="1981" label="P60879 (pp) Q7TSJ2" source="509" target="170" cy:directed="1"/>
      <edge id="1980" label="P60879 (pp) O08599" source="509" target="216" cy:directed="1"/>
      <edge id="1979" label="P60879 (pp) P61264" source="509" target="423" cy:directed="1"/>
      <edge id="1978" label="P60879 (pp) P63040" source="509" target="429" cy:directed="1"/>
      <edge id="1977" label="P60879 (pp) Q8K400" source="509" target="93" cy:directed="1"/>
      <edge id="1976" label="P60879 (pp) O55042" source="509" target="274" cy:directed="1"/>
      <edge id="1975" label="P60879 (pp) P63017" source="509" target="470" cy:directed="1"/>
      <edge id="1974" label="P28660 (pp) Q9JJV2" source="508" target="482" cy:directed="1"/>
      <edge id="1973" label="O08756 (pp) Q99JY0" source="507" target="506" cy:directed="1"/>
      <edge id="1972" label="O08756 (pp) O09111" source="507" target="679" cy:directed="1"/>
      <edge id="1971" label="O08756 (pp) Q9CQH3" source="507" target="650" cy:directed="1"/>
      <edge id="1970" label="O08756 (pp) Q8BMS1" source="507" target="374" cy:directed="1"/>
      <edge id="1969" label="Q99JY0 (pp) Q9DBL1" source="506" target="439" cy:directed="1"/>
      <edge id="1968" label="Q99JY0 (pp) Q8BMS1" source="506" target="374" cy:directed="1"/>
      <edge id="1967" label="P04925 (pp) Q8VDN2" source="505" target="406" cy:directed="1"/>
      <edge id="1966" label="P04925 (pp) Q9Z218" source="505" target="322" cy:directed="1"/>
      <edge id="1965" label="P04925 (pp) Q99N28" source="505" target="518" cy:directed="1"/>
      <edge id="1964" label="P04925 (pp) Q99PJ0" source="505" target="264" cy:directed="1"/>
      <edge id="1963" label="P04925 (pp) O88935" source="505" target="459" cy:directed="1"/>
      <edge id="1962" label="P04925 (pp) P63101" source="505" target="411" cy:directed="1"/>
      <edge id="1961" label="P04925 (pp) O08599" source="505" target="216" cy:directed="1"/>
      <edge id="1960" label="P04925 (pp) P11627" source="505" target="329" cy:directed="1"/>
      <edge id="1959" label="P04925 (pp) O35136" source="505" target="169" cy:directed="1"/>
      <edge id="1958" label="P04925 (pp) P62259" source="505" target="665" cy:directed="1"/>
      <edge id="1957" label="P39688 (pp) P49615" source="504" target="503" cy:directed="1"/>
      <edge id="1956" label="P39688 (pp) P18052" source="504" target="476" cy:directed="1"/>
      <edge id="1955" label="P39688 (pp) P30999" source="504" target="306" cy:directed="1"/>
      <edge id="1954" label="P39688 (pp) Q60631" source="504" target="537" cy:directed="1"/>
      <edge id="1953" label="P49615 (pp) P19246" source="503" target="232" cy:directed="1"/>
      <edge id="1952" label="P03930 (pp) Q9D3D9" source="502" target="680" cy:directed="1"/>
      <edge id="1951" label="P03930 (pp) Q91VR2" source="502" target="627" cy:directed="1"/>
      <edge id="1950" label="P03930 (pp) Q9CQQ7" source="502" target="481" cy:directed="1"/>
      <edge id="1949" label="Q9CQ75 (pp) Q9DC70" source="501" target="618" cy:directed="1"/>
      <edge id="1948" label="Q9CQ75 (pp) P52503" source="501" target="538" cy:directed="1"/>
      <edge id="1947" label="Q9CQ75 (pp) Q91YT0" source="501" target="511" cy:directed="1"/>
      <edge id="1946" label="Q9CQ75 (pp) Q9DB20" source="501" target="651" cy:directed="1"/>
      <edge id="1945" label="Q9CQ75 (pp) Q9D855" source="501" target="487" cy:directed="1"/>
      <edge id="1944" label="Q9CQ75 (pp) P97450" source="501" target="460" cy:directed="1"/>
      <edge id="1943" label="Q9CQ75 (pp) Q9DCS9" source="501" target="624" cy:directed="1"/>
      <edge id="1942" label="Q9CQ75 (pp) O09111" source="501" target="679" cy:directed="1"/>
      <edge id="1941" label="Q9CQ75 (pp) Q9CQC7" source="501" target="396" cy:directed="1"/>
      <edge id="1940" label="Q9CQ75 (pp) Q9CQ54" source="501" target="658" cy:directed="1"/>
      <edge id="1939" label="Q9CQ75 (pp) Q9DCJ5" source="501" target="510" cy:directed="1"/>
      <edge id="1938" label="Q9CQ75 (pp) Q99LY9" source="501" target="638" cy:directed="1"/>
      <edge id="1937" label="Q9CQ75 (pp) Q9CQZ6" source="501" target="659" cy:directed="1"/>
      <edge id="1936" label="Q9CQ75 (pp) Q9DCX2" source="501" target="524" cy:directed="1"/>
      <edge id="1935" label="Q9CQ75 (pp) Q9CQ69" source="501" target="656" cy:directed="1"/>
      <edge id="1934" label="Q9CQ75 (pp) P56391" source="501" target="559" cy:directed="1"/>
      <edge id="1933" label="Q9CQ75 (pp) Q9Z1P6" source="501" target="591" cy:directed="1"/>
      <edge id="1932" label="Q9CQ75 (pp) Q9D0M3" source="501" target="640" cy:directed="1"/>
      <edge id="1931" label="Q9CQ75 (pp) Q9CQH3" source="501" target="650" cy:directed="1"/>
      <edge id="1930" label="Q9CQ75 (pp) Q62425" source="501" target="345" cy:directed="1"/>
      <edge id="1929" label="Q9CQ75 (pp) P43024" source="501" target="418" cy:directed="1"/>
      <edge id="1928" label="Q9CQ75 (pp) Q9ERS2" source="501" target="551" cy:directed="1"/>
      <edge id="1927" label="Q9CQ75 (pp) Q9CR68" source="501" target="623" cy:directed="1"/>
      <edge id="1926" label="Q9CQ75 (pp) Q3UIU2" source="501" target="602" cy:directed="1"/>
      <edge id="1925" label="Q9CQ75 (pp) Q99LC3" source="501" target="639" cy:directed="1"/>
      <edge id="1924" label="Q9CQ75 (pp) Q9D6J5" source="501" target="403" cy:directed="1"/>
      <edge id="1923" label="Q9CQ75 (pp) Q7TMF3" source="501" target="525" cy:directed="1"/>
      <edge id="1922" label="Q9CQ75 (pp) Q9CXZ1" source="501" target="494" cy:directed="1"/>
      <edge id="1921" label="Q9CQ75 (pp) Q9D6J6" source="501" target="683" cy:directed="1"/>
      <edge id="1920" label="Q9CQ75 (pp) Q9D3D9" source="501" target="680" cy:directed="1"/>
      <edge id="1919" label="Q9CQ75 (pp) Q9CPQ1" source="501" target="286" cy:directed="1"/>
      <edge id="1918" label="Q9CQ75 (pp) Q9DC69" source="501" target="483" cy:directed="1"/>
      <edge id="1917" label="Q9CQ75 (pp) Q9CQZ5" source="501" target="684" cy:directed="1"/>
      <edge id="1916" label="Q9CQ75 (pp) Q8K3J1" source="501" target="486" cy:directed="1"/>
      <edge id="1915" label="Q9CQ75 (pp) Q9CQJ8" source="501" target="620" cy:directed="1"/>
      <edge id="1914" label="Q9CQ75 (pp) Q91VD9" source="501" target="625" cy:directed="1"/>
      <edge id="1913" label="Q9CQ75 (pp) Q9CPP6" source="501" target="609" cy:directed="1"/>
      <edge id="1912" label="P18872 (pp) P06151" source="500" target="652" cy:directed="1"/>
      <edge id="1911" label="P18872 (pp) P62874" source="500" target="529" cy:directed="1"/>
      <edge id="1910" label="P18872 (pp) P12023" source="500" target="565" cy:directed="1"/>
      <edge id="1909" label="Q8VDD5 (pp) Q01097" source="499" target="686" cy:directed="1"/>
      <edge id="1908" label="Q8VDD5 (pp) P63101" source="499" target="411" cy:directed="1"/>
      <edge id="1907" label="Q8VDD5 (pp) P35438" source="499" target="675" cy:directed="1"/>
      <edge id="1906" label="P51174 (pp) Q99JY0" source="498" target="506" cy:directed="1"/>
      <edge id="1905" label="P51174 (pp) Q8BGD5" source="498" target="372" cy:directed="1"/>
      <edge id="1904" label="P51174 (pp) Q61425" source="498" target="576" cy:directed="1"/>
      <edge id="1903" label="P51174 (pp) P41216" source="498" target="262" cy:directed="1"/>
      <edge id="1902" label="P51174 (pp) Q921G7" source="498" target="580" cy:directed="1"/>
      <edge id="1901" label="P51174 (pp) Q8BWT1" source="498" target="579" cy:directed="1"/>
      <edge id="1900" label="P51174 (pp) Q91WC3" source="498" target="268" cy:directed="1"/>
      <edge id="1899" label="P51174 (pp) Q8BMS1" source="498" target="374" cy:directed="1"/>
      <edge id="1898" label="P51174 (pp) Q99LC5" source="498" target="575" cy:directed="1"/>
      <edge id="1897" label="Q8JZQ2 (pp) Q68FF6" source="497" target="307" cy:directed="1"/>
      <edge id="1896" label="Q8JZQ2 (pp) P00493" source="497" target="290" cy:directed="1"/>
      <edge id="1895" label="Q8JZQ2 (pp) P63038" source="497" target="643" cy:directed="1"/>
      <edge id="1894" label="Q8JZN5 (pp) Q99LC5" source="496" target="575" cy:directed="1"/>
      <edge id="1893" label="Q8JZN5 (pp) Q8BMS1" source="496" target="374" cy:directed="1"/>
      <edge id="1892" label="Q8JZN5 (pp) Q61425" source="496" target="576" cy:directed="1"/>
      <edge id="1891" label="Q60676 (pp) P63330" source="495" target="661" cy:directed="1"/>
      <edge id="1890" label="Q60676 (pp) P35438" source="495" target="675" cy:directed="1"/>
      <edge id="1889" label="Q9CXZ1 (pp) Q9CPP6" source="494" target="609" cy:directed="1"/>
      <edge id="1888" label="Q9CXZ1 (pp) Q9CQZ5" source="494" target="684" cy:directed="1"/>
      <edge id="1887" label="Q9CXZ1 (pp) Q9CQC7" source="494" target="396" cy:directed="1"/>
      <edge id="1886" label="Q9CXZ1 (pp) Q99LC3" source="494" target="639" cy:directed="1"/>
      <edge id="1885" label="Q9CXZ1 (pp) Q9CQ54" source="494" target="658" cy:directed="1"/>
      <edge id="1884" label="Q9CXZ1 (pp) Q9CQZ6" source="494" target="659" cy:directed="1"/>
      <edge id="1883" label="Q9CXZ1 (pp) Q9DB77" source="494" target="485" cy:directed="1"/>
      <edge id="1882" label="Q9CXZ1 (pp) P97450" source="494" target="460" cy:directed="1"/>
      <edge id="1881" label="Q9CXZ1 (pp) Q9D6J5" source="494" target="403" cy:directed="1"/>
      <edge id="1880" label="Q9CXZ1 (pp) Q9CQH3" source="494" target="650" cy:directed="1"/>
      <edge id="1879" label="Q9CXZ1 (pp) Q9CQQ7" source="494" target="481" cy:directed="1"/>
      <edge id="1878" label="Q9CXZ1 (pp) Q9DCJ5" source="494" target="510" cy:directed="1"/>
      <edge id="1877" label="Q9CXZ1 (pp) Q99LY9" source="494" target="638" cy:directed="1"/>
      <edge id="1876" label="Q9CXZ1 (pp) Q9CR68" source="494" target="623" cy:directed="1"/>
      <edge id="1875" label="Q9CXZ1 (pp) Q91YT0" source="494" target="511" cy:directed="1"/>
      <edge id="1874" label="Q9CXZ1 (pp) Q62425" source="494" target="345" cy:directed="1"/>
      <edge id="1873" label="Q9CXZ1 (pp) Q9CQJ8" source="494" target="620" cy:directed="1"/>
      <edge id="1872" label="Q9CXZ1 (pp) Q9Z1P6" source="494" target="591" cy:directed="1"/>
      <edge id="1871" label="Q9CXZ1 (pp) Q9D0M3" source="494" target="640" cy:directed="1"/>
      <edge id="1870" label="Q9CXZ1 (pp) O09111" source="494" target="679" cy:directed="1"/>
      <edge id="1869" label="Q9CXZ1 (pp) Q3UIU2" source="494" target="602" cy:directed="1"/>
      <edge id="1868" label="Q9CXZ1 (pp) Q9ERS2" source="494" target="551" cy:directed="1"/>
      <edge id="1867" label="Q9CXZ1 (pp) Q8K3J1" source="494" target="486" cy:directed="1"/>
      <edge id="1866" label="Q9CXZ1 (pp) Q9CQ69" source="494" target="656" cy:directed="1"/>
      <edge id="1865" label="Q9CXZ1 (pp) Q9DCS9" source="494" target="624" cy:directed="1"/>
      <edge id="1864" label="Q9CXZ1 (pp) Q9DC69" source="494" target="483" cy:directed="1"/>
      <edge id="1863" label="Q9CXZ1 (pp) Q91VD9" source="494" target="625" cy:directed="1"/>
      <edge id="1862" label="Q9CXZ1 (pp) Q9D6J6" source="494" target="683" cy:directed="1"/>
      <edge id="1861" label="Q8BG51 (pp) P63001" source="493" target="492" cy:directed="1"/>
      <edge id="1860" label="Q8BG51 (pp) Q5FWK3" source="493" target="400" cy:directed="1"/>
      <edge id="1859" label="Q8BG51 (pp) P84096" source="493" target="186" cy:directed="1"/>
      <edge id="1858" label="P63001 (pp) Q5FWK3" source="492" target="400" cy:directed="1"/>
      <edge id="1857" label="P63001 (pp) P60766" source="492" target="363" cy:directed="1"/>
      <edge id="1856" label="P63001 (pp) P35438" source="492" target="675" cy:directed="1"/>
      <edge id="1855" label="Q62351 (pp) Q91VZ6" source="491" target="252" cy:directed="1"/>
      <edge id="1854" label="Q62351 (pp) Q68FD5" source="491" target="514" cy:directed="1"/>
      <edge id="1853" label="P63044 (pp) P60766" source="490" target="363" cy:directed="1"/>
      <edge id="1852" label="P63044 (pp) O55042" source="490" target="274" cy:directed="1"/>
      <edge id="1851" label="P63044 (pp) P28663" source="490" target="260" cy:directed="1"/>
      <edge id="1850" label="P63044 (pp) Q6PIC6" source="490" target="257" cy:directed="1"/>
      <edge id="1849" label="P63044 (pp) P39053" source="490" target="393" cy:directed="1"/>
      <edge id="1848" label="P63044 (pp) Q99LX0" source="490" target="573" cy:directed="1"/>
      <edge id="1847" label="P63044 (pp) P62874" source="490" target="529" cy:directed="1"/>
      <edge id="1846" label="P63044 (pp) O35526" source="490" target="561" cy:directed="1"/>
      <edge id="1845" label="P63044 (pp) Q6PIE5" source="490" target="316" cy:directed="1"/>
      <edge id="1844" label="P63044 (pp) P18872" source="490" target="500" cy:directed="1"/>
      <edge id="1843" label="P63044 (pp) P51863" source="490" target="667" cy:directed="1"/>
      <edge id="1842" label="P63044 (pp) P35802" source="490" target="84" cy:directed="1"/>
      <edge id="1841" label="P46660 (pp) P35438" source="489" target="675" cy:directed="1"/>
      <edge id="1840" label="P46660 (pp) P19246" source="489" target="232" cy:directed="1"/>
      <edge id="1839" label="Q9JHU4 (pp) Q60996" source="488" target="304" cy:directed="1"/>
      <edge id="1838" label="Q9JHU4 (pp) Q99KJ8" source="488" target="554" cy:directed="1"/>
      <edge id="1837" label="Q9JHU4 (pp) Q9DC28" source="488" target="238" cy:directed="1"/>
      <edge id="1836" label="Q9JHU4 (pp) P68368" source="488" target="358" cy:directed="1"/>
      <edge id="1835" label="Q9JHU4 (pp) P63101" source="488" target="411" cy:directed="1"/>
      <edge id="1834" label="Q9JHU4 (pp) P68369" source="488" target="542" cy:directed="1"/>
      <edge id="1833" label="Q9JHU4 (pp) O08788" source="488" target="553" cy:directed="1"/>
      <edge id="1832" label="Q9JHU4 (pp) P07901" source="488" target="382" cy:directed="1"/>
      <edge id="1831" label="Q9JHU4 (pp) P63005" source="488" target="584" cy:directed="1"/>
      <edge id="1830" label="Q9JHU4 (pp) Q8BPN8" source="488" target="443" cy:directed="1"/>
      <edge id="1829" label="Q9D855 (pp) Q8K3J1" source="487" target="486" cy:directed="1"/>
      <edge id="1828" label="Q9D855 (pp) Q9DCX2" source="487" target="524" cy:directed="1"/>
      <edge id="1827" label="Q9D855 (pp) Q91VR2" source="487" target="627" cy:directed="1"/>
      <edge id="1826" label="Q9D855 (pp) Q9CQZ5" source="487" target="684" cy:directed="1"/>
      <edge id="1825" label="Q9D855 (pp) Q9D3D9" source="487" target="680" cy:directed="1"/>
      <edge id="1824" label="Q9D855 (pp) Q9CQJ8" source="487" target="620" cy:directed="1"/>
      <edge id="1823" label="Q9D855 (pp) Q9D6J6" source="487" target="683" cy:directed="1"/>
      <edge id="1822" label="Q9D855 (pp) Q9CQ69" source="487" target="656" cy:directed="1"/>
      <edge id="1821" label="Q9D855 (pp) Q3UIU2" source="487" target="602" cy:directed="1"/>
      <edge id="1820" label="Q9D855 (pp) P52503" source="487" target="538" cy:directed="1"/>
      <edge id="1819" label="Q9D855 (pp) P97807" source="487" target="550" cy:directed="1"/>
      <edge id="1818" label="Q9D855 (pp) Q9DCS9" source="487" target="624" cy:directed="1"/>
      <edge id="1817" label="Q9D855 (pp) Q9D023" source="487" target="474" cy:directed="1"/>
      <edge id="1816" label="Q9D855 (pp) Q9CQZ6" source="487" target="659" cy:directed="1"/>
      <edge id="1815" label="Q9D855 (pp) Q06185" source="487" target="619" cy:directed="1"/>
      <edge id="1814" label="Q9D855 (pp) P56391" source="487" target="559" cy:directed="1"/>
      <edge id="1813" label="Q9D855 (pp) Q9CPP6" source="487" target="609" cy:directed="1"/>
      <edge id="1812" label="Q9D855 (pp) Q9DB77" source="487" target="485" cy:directed="1"/>
      <edge id="1811" label="Q9D855 (pp) Q9DC69" source="487" target="483" cy:directed="1"/>
      <edge id="1810" label="Q9D855 (pp) Q9DB20" source="487" target="651" cy:directed="1"/>
      <edge id="1809" label="Q9D855 (pp) Q9CR68" source="487" target="623" cy:directed="1"/>
      <edge id="1808" label="Q9D855 (pp) Q99LY9" source="487" target="638" cy:directed="1"/>
      <edge id="1807" label="Q9D855 (pp) Q9DCJ5" source="487" target="510" cy:directed="1"/>
      <edge id="1806" label="Q9D855 (pp) Q91VD9" source="487" target="625" cy:directed="1"/>
      <edge id="1805" label="Q9D855 (pp) Q9D0M3" source="487" target="640" cy:directed="1"/>
      <edge id="1804" label="Q9D855 (pp) P97450" source="487" target="460" cy:directed="1"/>
      <edge id="1803" label="Q9D855 (pp) Q9CZ13" source="487" target="641" cy:directed="1"/>
      <edge id="1802" label="Q9D855 (pp) Q9CQQ7" source="487" target="481" cy:directed="1"/>
      <edge id="1801" label="Q9D855 (pp) Q9ERS2" source="487" target="551" cy:directed="1"/>
      <edge id="1800" label="Q9D855 (pp) Q8K2B3" source="487" target="543" cy:directed="1"/>
      <edge id="1799" label="Q9D855 (pp) Q91YT0" source="487" target="511" cy:directed="1"/>
      <edge id="1798" label="Q9D855 (pp) P43024" source="487" target="418" cy:directed="1"/>
      <edge id="1797" label="Q9D855 (pp) Q03265" source="487" target="678" cy:directed="1"/>
      <edge id="1796" label="Q9D855 (pp) Q9CQH3" source="487" target="650" cy:directed="1"/>
      <edge id="1795" label="Q8K3J1 (pp) Q3UIU2" source="486" target="602" cy:directed="1"/>
      <edge id="1794" label="Q8K3J1 (pp) Q99LX0" source="486" target="573" cy:directed="1"/>
      <edge id="1793" label="Q8K3J1 (pp) O09111" source="486" target="679" cy:directed="1"/>
      <edge id="1792" label="Q8K3J1 (pp) Q9D3D9" source="486" target="680" cy:directed="1"/>
      <edge id="1791" label="Q8K3J1 (pp) Q9ERS2" source="486" target="551" cy:directed="1"/>
      <edge id="1790" label="Q8K3J1 (pp) Q9CQQ7" source="486" target="481" cy:directed="1"/>
      <edge id="1789" label="Q8K3J1 (pp) Q9CQH3" source="486" target="650" cy:directed="1"/>
      <edge id="1788" label="Q8K3J1 (pp) Q9DCX2" source="486" target="524" cy:directed="1"/>
      <edge id="1787" label="Q8K3J1 (pp) P56391" source="486" target="559" cy:directed="1"/>
      <edge id="1786" label="Q8K3J1 (pp) Q9DC69" source="486" target="483" cy:directed="1"/>
      <edge id="1785" label="Q8K3J1 (pp) Q9D6J6" source="486" target="683" cy:directed="1"/>
      <edge id="1784" label="Q8K3J1 (pp) Q91VR2" source="486" target="627" cy:directed="1"/>
      <edge id="1783" label="Q9DB77 (pp) Q9CQH3" source="485" target="650" cy:directed="1"/>
      <edge id="1782" label="Q9DB77 (pp) Q91YT0" source="485" target="511" cy:directed="1"/>
      <edge id="1781" label="Q9DB77 (pp) Q9DC69" source="485" target="483" cy:directed="1"/>
      <edge id="1780" label="Q9DB77 (pp) Q9WUM5" source="485" target="614" cy:directed="1"/>
      <edge id="1779" label="Q9DB77 (pp) Q9CQ69" source="485" target="656" cy:directed="1"/>
      <edge id="1778" label="Q9DB77 (pp) P68510" source="485" target="677" cy:directed="1"/>
      <edge id="1777" label="Q9DB77 (pp) P19783" source="485" target="645" cy:directed="1"/>
      <edge id="1776" label="Q9DB77 (pp) Q99LC5" source="485" target="575" cy:directed="1"/>
      <edge id="1775" label="Q9DB77 (pp) Q91VR2" source="485" target="627" cy:directed="1"/>
      <edge id="1774" label="Q9DB77 (pp) Q99JY0" source="485" target="506" cy:directed="1"/>
      <edge id="1773" label="Q9DB77 (pp) Q3UIU2" source="485" target="602" cy:directed="1"/>
      <edge id="1772" label="Q9DB77 (pp) Q99P72" source="485" target="212" cy:directed="1"/>
      <edge id="1771" label="Q9DB77 (pp) O09111" source="485" target="679" cy:directed="1"/>
      <edge id="1770" label="Q9DB77 (pp) Q9CR68" source="485" target="623" cy:directed="1"/>
      <edge id="1769" label="Q9DB77 (pp) Q9DCJ5" source="485" target="510" cy:directed="1"/>
      <edge id="1768" label="Q9DB77 (pp) Q9DCS9" source="485" target="624" cy:directed="1"/>
      <edge id="1767" label="Q9DB77 (pp) Q9CQQ7" source="485" target="481" cy:directed="1"/>
      <edge id="1766" label="Q9DB77 (pp) Q9DCX2" source="485" target="524" cy:directed="1"/>
      <edge id="1765" label="Q9DB77 (pp) Q99LY9" source="485" target="638" cy:directed="1"/>
      <edge id="1764" label="Q9DB77 (pp) Q9ERS2" source="485" target="551" cy:directed="1"/>
      <edge id="1763" label="Q9DB77 (pp) Q9D6J6" source="485" target="683" cy:directed="1"/>
      <edge id="1762" label="Q9DB77 (pp) Q8VEM8" source="485" target="541" cy:directed="1"/>
      <edge id="1761" label="Q9DB77 (pp) P00405" source="485" target="221" cy:directed="1"/>
      <edge id="1760" label="Q91VM9 (pp) Q9CQQ7" source="484" target="481" cy:directed="1"/>
      <edge id="1759" label="Q91VM9 (pp) P63082" source="484" target="442" cy:directed="1"/>
      <edge id="1758" label="Q91VM9 (pp) Q99LC5" source="484" target="575" cy:directed="1"/>
      <edge id="1757" label="Q9DC69 (pp) Q91VR2" source="483" target="627" cy:directed="1"/>
      <edge id="1756" label="Q9DC69 (pp) O09111" source="483" target="679" cy:directed="1"/>
      <edge id="1755" label="Q9DC69 (pp) Q9CQQ7" source="483" target="481" cy:directed="1"/>
      <edge id="1754" label="Q9DC69 (pp) Q9D3D9" source="483" target="680" cy:directed="1"/>
      <edge id="1753" label="Q9DC69 (pp) P99029" source="483" target="534" cy:directed="1"/>
      <edge id="1752" label="Q9DC69 (pp) Q9D6J6" source="483" target="683" cy:directed="1"/>
      <edge id="1751" label="Q9DC69 (pp) Q9DCX2" source="483" target="524" cy:directed="1"/>
      <edge id="1750" label="Q9DC69 (pp) Q9CQH3" source="483" target="650" cy:directed="1"/>
      <edge id="1749" label="Q9DC69 (pp) Q99LX0" source="483" target="573" cy:directed="1"/>
      <edge id="1748" label="Q9DC69 (pp) Q9ERS2" source="483" target="551" cy:directed="1"/>
      <edge id="1747" label="Q9JJV2 (pp) P60710" source="482" target="548" cy:directed="1"/>
      <edge id="1746" label="Q9JJV2 (pp) Q9QXS6" source="482" target="351" cy:directed="1"/>
      <edge id="1745" label="Q9JJV2 (pp) P39053" source="482" target="393" cy:directed="1"/>
      <edge id="1744" label="Q9JJV2 (pp) O88935" source="482" target="459" cy:directed="1"/>
      <edge id="1743" label="Q9CQQ7 (pp) Q9CQH3" source="481" target="650" cy:directed="1"/>
      <edge id="1742" label="Q9CQQ7 (pp) Q99LY9" source="481" target="638" cy:directed="1"/>
      <edge id="1741" label="Q9CQQ7 (pp) Q91VR2" source="481" target="627" cy:directed="1"/>
      <edge id="1740" label="Q9CQQ7 (pp) Q3UIU2" source="481" target="602" cy:directed="1"/>
      <edge id="1739" label="Q9CQQ7 (pp) Q9D6J6" source="481" target="683" cy:directed="1"/>
      <edge id="1738" label="Q9CQQ7 (pp) Q9ERS2" source="481" target="551" cy:directed="1"/>
      <edge id="1737" label="Q9CQQ7 (pp) Q9D3D9" source="481" target="680" cy:directed="1"/>
      <edge id="1736" label="O88696 (pp) O35129" source="480" target="479" cy:directed="1"/>
      <edge id="1735" label="O88696 (pp) Q9D0M3" source="480" target="640" cy:directed="1"/>
      <edge id="1734" label="O88696 (pp) Q9DB20" source="480" target="651" cy:directed="1"/>
      <edge id="1733" label="O88696 (pp) P63038" source="480" target="643" cy:directed="1"/>
      <edge id="1732" label="O88696 (pp) Q9D6J6" source="480" target="683" cy:directed="1"/>
      <edge id="1731" label="O88696 (pp) Q9D3D9" source="480" target="680" cy:directed="1"/>
      <edge id="1730" label="O88696 (pp) Q9DC70" source="480" target="618" cy:directed="1"/>
      <edge id="1729" label="O88696 (pp) Q8BGH2" source="480" target="574" cy:directed="1"/>
      <edge id="1728" label="O88696 (pp) P42125" source="480" target="371" cy:directed="1"/>
      <edge id="1727" label="O88696 (pp) Q91YT0" source="480" target="511" cy:directed="1"/>
      <edge id="1726" label="O88696 (pp) O08756" source="480" target="507" cy:directed="1"/>
      <edge id="1725" label="O88696 (pp) P52503" source="480" target="538" cy:directed="1"/>
      <edge id="1724" label="O88696 (pp) Q91Z53" source="480" target="555" cy:directed="1"/>
      <edge id="1723" label="O88696 (pp) P17751" source="480" target="593" cy:directed="1"/>
      <edge id="1722" label="O88696 (pp) Q8CGK3" source="480" target="132" cy:directed="1"/>
      <edge id="1721" label="O88696 (pp) Q9DCT2" source="480" target="657" cy:directed="1"/>
      <edge id="1720" label="O88696 (pp) P67778" source="480" target="629" cy:directed="1"/>
      <edge id="1719" label="O88696 (pp) Q9Z1P6" source="480" target="591" cy:directed="1"/>
      <edge id="1718" label="O88696 (pp) Q99LX0" source="480" target="573" cy:directed="1"/>
      <edge id="1717" label="O88696 (pp) Q9CZ13" source="480" target="641" cy:directed="1"/>
      <edge id="1716" label="O88696 (pp) P56480" source="480" target="632" cy:directed="1"/>
      <edge id="1715" label="O88696 (pp) P97807" source="480" target="550" cy:directed="1"/>
      <edge id="1714" label="O88696 (pp) Q8K3J1" source="480" target="486" cy:directed="1"/>
      <edge id="1713" label="O88696 (pp) Q9CQA3" source="480" target="578" cy:directed="1"/>
      <edge id="1712" label="O35129 (pp) P62073" source="479" target="535" cy:directed="1"/>
      <edge id="1711" label="O35129 (pp) Q8BGH2" source="479" target="574" cy:directed="1"/>
      <edge id="1710" label="O35129 (pp) Q9CZ13" source="479" target="641" cy:directed="1"/>
      <edge id="1709" label="O35129 (pp) Q9DCT2" source="479" target="657" cy:directed="1"/>
      <edge id="1708" label="O35129 (pp) P67778" source="479" target="629" cy:directed="1"/>
      <edge id="1707" label="O35129 (pp) Q99LX0" source="479" target="573" cy:directed="1"/>
      <edge id="1706" label="O35129 (pp) Q9D0M3" source="479" target="640" cy:directed="1"/>
      <edge id="1705" label="O35129 (pp) P63038" source="479" target="643" cy:directed="1"/>
      <edge id="1704" label="O35129 (pp) O35658" source="479" target="526" cy:directed="1"/>
      <edge id="1703" label="Q9CZS1 (pp) Q9EQ20" source="478" target="528" cy:directed="1"/>
      <edge id="1702" label="Q9CZS1 (pp) Q8CHT0" source="478" target="388" cy:directed="1"/>
      <edge id="1701" label="Q9CZS1 (pp) P61922" source="478" target="566" cy:directed="1"/>
      <edge id="1700" label="P70232 (pp) P18052" source="477" target="476" cy:directed="1"/>
      <edge id="1699" label="P18052 (pp) P43406" source="476" target="194" cy:directed="1"/>
      <edge id="1698" label="P18052 (pp) P05480" source="476" target="546" cy:directed="1"/>
      <edge id="1697" label="P56379 (pp) Q9CQH3" source="475" target="650" cy:directed="1"/>
      <edge id="1696" label="P56379 (pp) Q06185" source="475" target="619" cy:directed="1"/>
      <edge id="1695" label="P56379 (pp) Q9Z1P6" source="475" target="591" cy:directed="1"/>
      <edge id="1694" label="P56379 (pp) Q9CQ69" source="475" target="656" cy:directed="1"/>
      <edge id="1693" label="P56379 (pp) P48771" source="475" target="587" cy:directed="1"/>
      <edge id="1692" label="P56379 (pp) Q9CQZ5" source="475" target="684" cy:directed="1"/>
      <edge id="1691" label="P56379 (pp) P52503" source="475" target="538" cy:directed="1"/>
      <edge id="1690" label="P56379 (pp) Q9D855" source="475" target="487" cy:directed="1"/>
      <edge id="1689" label="P56379 (pp) P97450" source="475" target="460" cy:directed="1"/>
      <edge id="1688" label="P56379 (pp) Q9CQZ6" source="475" target="659" cy:directed="1"/>
      <edge id="1687" label="P56379 (pp) Q9CPQ8" source="475" target="626" cy:directed="1"/>
      <edge id="1686" label="P56379 (pp) Q9DB20" source="475" target="651" cy:directed="1"/>
      <edge id="1685" label="Q9D023 (pp) Q99LC5" source="474" target="575" cy:directed="1"/>
      <edge id="1684" label="Q9D023 (pp) Q9D6J6" source="474" target="683" cy:directed="1"/>
      <edge id="1683" label="Q9D023 (pp) Q9CQH3" source="474" target="650" cy:directed="1"/>
      <edge id="1682" label="P12367 (pp) Q8BR92" source="473" target="390" cy:directed="1"/>
      <edge id="1681" label="P12367 (pp) D3YVF0" source="473" target="100" cy:directed="1"/>
      <edge id="1680" label="Q61548 (pp) P17427" source="472" target="600" cy:directed="1"/>
      <edge id="1679" label="P63017 (pp) P63037" source="470" target="611" cy:directed="1"/>
      <edge id="1678" label="P63017 (pp) Q60864" source="470" target="516" cy:directed="1"/>
      <edge id="1677" label="P63017 (pp) P63038" source="470" target="643" cy:directed="1"/>
      <edge id="1676" label="P63017 (pp) P11499" source="470" target="570" cy:directed="1"/>
      <edge id="1675" label="P63017 (pp) P62259" source="470" target="665" cy:directed="1"/>
      <edge id="1674" label="P63017 (pp) P07901" source="470" target="382" cy:directed="1"/>
      <edge id="1673" label="P63017 (pp) P10637" source="470" target="356" cy:directed="1"/>
      <edge id="1672" label="P63017 (pp) Q9QYJ0" source="470" target="515" cy:directed="1"/>
      <edge id="1671" label="P63017 (pp) Q61699" source="470" target="172" cy:directed="1"/>
      <edge id="1670" label="Q9D898 (pp) P59999" source="469" target="398" cy:directed="1"/>
      <edge id="1669" label="Q9R0K7 (pp) P12023" source="467" target="565" cy:directed="1"/>
      <edge id="1668" label="Q9R0K7 (pp) P04925" source="467" target="505" cy:directed="1"/>
      <edge id="1667" label="P13707 (pp) Q64521" source="466" target="465" cy:directed="1"/>
      <edge id="1666" label="P13707 (pp) Q64516" source="466" target="407" cy:directed="1"/>
      <edge id="1665" label="P13707 (pp) P17751" source="466" target="593" cy:directed="1"/>
      <edge id="1664" label="Q64521 (pp) Q64516" source="465" target="407" cy:directed="1"/>
      <edge id="1663" label="Q64521 (pp) Q3ULJ0" source="465" target="131" cy:directed="1"/>
      <edge id="1662" label="Q9QUH0 (pp) P20108" source="464" target="463" cy:directed="1"/>
      <edge id="1661" label="Q9QUH0 (pp) P99029" source="464" target="534" cy:directed="1"/>
      <edge id="1660" label="Q9QUH0 (pp) O70325" source="464" target="588" cy:directed="1"/>
      <edge id="1659" label="P20108 (pp) Q9DB77" source="463" target="485" cy:directed="1"/>
      <edge id="1658" label="P20108 (pp) Q99LC5" source="463" target="575" cy:directed="1"/>
      <edge id="1657" label="P20108 (pp) Q9WUM5" source="463" target="614" cy:directed="1"/>
      <edge id="1656" label="P20108 (pp) P63038" source="463" target="643" cy:directed="1"/>
      <edge id="1655" label="Q64010 (pp) P05480" source="461" target="546" cy:directed="1"/>
      <edge id="1654" label="Q64010 (pp) P63101" source="461" target="411" cy:directed="1"/>
      <edge id="1653" label="Q64010 (pp) P62259" source="461" target="665" cy:directed="1"/>
      <edge id="1652" label="Q64010 (pp) P61982" source="461" target="381" cy:directed="1"/>
      <edge id="1651" label="Q64010 (pp) P68254" source="461" target="310" cy:directed="1"/>
      <edge id="1650" label="Q64010 (pp) P68510" source="461" target="677" cy:directed="1"/>
      <edge id="1649" label="P97450 (pp) Q91VM9" source="460" target="484" cy:directed="1"/>
      <edge id="1648" label="P97450 (pp) Q9DCS9" source="460" target="624" cy:directed="1"/>
      <edge id="1647" label="P97450 (pp) Q99LY9" source="460" target="638" cy:directed="1"/>
      <edge id="1646" label="P97450 (pp) Q03265" source="460" target="678" cy:directed="1"/>
      <edge id="1645" label="P97450 (pp) Q9CQZ6" source="460" target="659" cy:directed="1"/>
      <edge id="1644" label="P97450 (pp) P03930" source="460" target="502" cy:directed="1"/>
      <edge id="1643" label="P97450 (pp) Q9ERS2" source="460" target="551" cy:directed="1"/>
      <edge id="1642" label="P97450 (pp) Q9DB77" source="460" target="485" cy:directed="1"/>
      <edge id="1641" label="P97450 (pp) Q06185" source="460" target="619" cy:directed="1"/>
      <edge id="1640" label="P97450 (pp) Q9DCX2" source="460" target="524" cy:directed="1"/>
      <edge id="1639" label="P97450 (pp) Q91VR2" source="460" target="627" cy:directed="1"/>
      <edge id="1638" label="P97450 (pp) O35658" source="460" target="526" cy:directed="1"/>
      <edge id="1637" label="P97450 (pp) Q9D6J6" source="460" target="683" cy:directed="1"/>
      <edge id="1636" label="P97450 (pp) Q60931" source="460" target="334" cy:directed="1"/>
      <edge id="1635" label="P97450 (pp) Q9D3D9" source="460" target="680" cy:directed="1"/>
      <edge id="1634" label="P97450 (pp) Q9WUM5" source="460" target="614" cy:directed="1"/>
      <edge id="1633" label="P97450 (pp) O88441" source="460" target="595" cy:directed="1"/>
      <edge id="1632" label="P97450 (pp) Q99LC5" source="460" target="575" cy:directed="1"/>
      <edge id="1631" label="P97450 (pp) Q9D6J5" source="460" target="403" cy:directed="1"/>
      <edge id="1630" label="P97450 (pp) Q3UIU2" source="460" target="602" cy:directed="1"/>
      <edge id="1629" label="P97450 (pp) Q91YT0" source="460" target="511" cy:directed="1"/>
      <edge id="1628" label="P97450 (pp) Q9CR68" source="460" target="623" cy:directed="1"/>
      <edge id="1627" label="P97450 (pp) Q9CPQ8" source="460" target="626" cy:directed="1"/>
      <edge id="1626" label="P97450 (pp) Q8VEM8" source="460" target="541" cy:directed="1"/>
      <edge id="1625" label="P97450 (pp) P19536" source="460" target="517" cy:directed="1"/>
      <edge id="1624" label="P97450 (pp) Q9CQH3" source="460" target="650" cy:directed="1"/>
      <edge id="1623" label="P97450 (pp) Q9CQ69" source="460" target="656" cy:directed="1"/>
      <edge id="1622" label="P97450 (pp) O09111" source="460" target="679" cy:directed="1"/>
      <edge id="1621" label="P97450 (pp) Q9CQ54" source="460" target="658" cy:directed="1"/>
      <edge id="1620" label="P97450 (pp) Q9CPP6" source="460" target="609" cy:directed="1"/>
      <edge id="1619" label="P97450 (pp) P56480" source="460" target="632" cy:directed="1"/>
      <edge id="1618" label="P97450 (pp) Q91VD9" source="460" target="625" cy:directed="1"/>
      <edge id="1617" label="P97450 (pp) Q9D023" source="460" target="474" cy:directed="1"/>
      <edge id="1616" label="P97450 (pp) Q9DCJ5" source="460" target="510" cy:directed="1"/>
      <edge id="1615" label="P97450 (pp) P56391" source="460" target="559" cy:directed="1"/>
      <edge id="1614" label="P97450 (pp) Q9DB20" source="460" target="651" cy:directed="1"/>
      <edge id="1613" label="P97450 (pp) Q9DC69" source="460" target="483" cy:directed="1"/>
      <edge id="1612" label="P97450 (pp) Q99LX0" source="460" target="573" cy:directed="1"/>
      <edge id="1611" label="P97450 (pp) Q9CQQ7" source="460" target="481" cy:directed="1"/>
      <edge id="1610" label="P97450 (pp) Q8K3J1" source="460" target="486" cy:directed="1"/>
      <edge id="1609" label="P97450 (pp) P19783" source="460" target="645" cy:directed="1"/>
      <edge id="1608" label="P97450 (pp) P48771" source="460" target="587" cy:directed="1"/>
      <edge id="1607" label="P97450 (pp) Q9Z1P6" source="460" target="591" cy:directed="1"/>
      <edge id="1606" label="O88935 (pp) P39053" source="459" target="393" cy:directed="1"/>
      <edge id="1605" label="Q99PT1 (pp) P56480" source="457" target="632" cy:directed="1"/>
      <edge id="1604" label="Q99PT1 (pp) O35465" source="457" target="444" cy:directed="1"/>
      <edge id="1603" label="Q99PT1 (pp) P63001" source="457" target="492" cy:directed="1"/>
      <edge id="1602" label="Q99PT1 (pp) P62746" source="457" target="330" cy:directed="1"/>
      <edge id="1601" label="Q99PT1 (pp) P26040" source="457" target="421" cy:directed="1"/>
      <edge id="1600" label="Q99PT1 (pp) P84096" source="457" target="186" cy:directed="1"/>
      <edge id="1599" label="Q99MN9 (pp) Q9EQ20" source="456" target="528" cy:directed="1"/>
      <edge id="1598" label="Q99MN9 (pp) Q91ZA3" source="456" target="413" cy:directed="1"/>
      <edge id="1597" label="Q99MN9 (pp) Q9WUM5" source="456" target="614" cy:directed="1"/>
      <edge id="1596" label="Q99MN9 (pp) Q8BWT1" source="456" target="579" cy:directed="1"/>
      <edge id="1595" label="Q99MN9 (pp) Q99JY0" source="456" target="506" cy:directed="1"/>
      <edge id="1594" label="Q99MN9 (pp) Q05920" source="456" target="636" cy:directed="1"/>
      <edge id="1593" label="Q99JY9 (pp) P14094" source="455" target="454" cy:directed="1"/>
      <edge id="1592" label="Q99JY9 (pp) Q8VDN2" source="455" target="406" cy:directed="1"/>
      <edge id="1591" label="Q99JY9 (pp) Q60598" source="455" target="342" cy:directed="1"/>
      <edge id="1590" label="Q99JY9 (pp) P59999" source="455" target="398" cy:directed="1"/>
      <edge id="1589" label="Q99JY9 (pp) Q9JM76" source="455" target="512" cy:directed="1"/>
      <edge id="1588" label="P14094 (pp) P04925" source="454" target="505" cy:directed="1"/>
      <edge id="1587" label="P47754 (pp) P16054" source="453" target="447" cy:directed="1"/>
      <edge id="1586" label="P47754 (pp) P63101" source="453" target="411" cy:directed="1"/>
      <edge id="1585" label="P47754 (pp) P47757" source="453" target="664" cy:directed="1"/>
      <edge id="1584" label="P47754 (pp) P62259" source="453" target="665" cy:directed="1"/>
      <edge id="1583" label="P35486 (pp) Q9WUM5" source="451" target="614" cy:directed="1"/>
      <edge id="1582" label="P35486 (pp) P06745" source="451" target="426" cy:directed="1"/>
      <edge id="1581" label="P35486 (pp) P52480" source="451" target="435" cy:directed="1"/>
      <edge id="1580" label="P35486 (pp) Q9DC69" source="451" target="483" cy:directed="1"/>
      <edge id="1579" label="P35486 (pp) Q922H2" source="451" target="199" cy:directed="1"/>
      <edge id="1578" label="P35486 (pp) Q9D2G2" source="451" target="603" cy:directed="1"/>
      <edge id="1577" label="P35486 (pp) P09411" source="451" target="592" cy:directed="1"/>
      <edge id="1576" label="P35486 (pp) P06151" source="451" target="652" cy:directed="1"/>
      <edge id="1575" label="P35486 (pp) Q05920" source="451" target="636" cy:directed="1"/>
      <edge id="1574" label="P35486 (pp) Q8BMF4" source="451" target="637" cy:directed="1"/>
      <edge id="1573" label="P22315 (pp) Q61102" source="450" target="449" cy:directed="1"/>
      <edge id="1572" label="P22315 (pp) P63038" source="450" target="643" cy:directed="1"/>
      <edge id="1571" label="P22315 (pp) Q9Z1J3" source="450" target="347" cy:directed="1"/>
      <edge id="1570" label="P62962 (pp) Q9JJV2" source="448" target="482" cy:directed="1"/>
      <edge id="1569" label="P62962 (pp) P59999" source="448" target="398" cy:directed="1"/>
      <edge id="1568" label="P62962 (pp) P39053" source="448" target="393" cy:directed="1"/>
      <edge id="1567" label="P62962 (pp) P99024" source="448" target="323" cy:directed="1"/>
      <edge id="1566" label="P62962 (pp) P60710" source="448" target="548" cy:directed="1"/>
      <edge id="1565" label="P16054 (pp) P47757" source="447" target="664" cy:directed="1"/>
      <edge id="1564" label="P16054 (pp) P16858" source="447" target="331" cy:directed="1"/>
      <edge id="1563" label="P16054 (pp) Q8BMS1" source="447" target="374" cy:directed="1"/>
      <edge id="1562" label="P16054 (pp) O35643" source="447" target="211" cy:directed="1"/>
      <edge id="1561" label="P16054 (pp) P48962" source="447" target="192" cy:directed="1"/>
      <edge id="1560" label="P16054 (pp) P63038" source="447" target="643" cy:directed="1"/>
      <edge id="1559" label="P16054 (pp) P23242" source="447" target="158" cy:directed="1"/>
      <edge id="1558" label="P16054 (pp) Q9CR62" source="447" target="144" cy:directed="1"/>
      <edge id="1557" label="P16054 (pp) Q99JY0" source="447" target="506" cy:directed="1"/>
      <edge id="1556" label="P16054 (pp) P35438" source="447" target="675" cy:directed="1"/>
      <edge id="1555" label="P16054 (pp) Q9CQR4" source="447" target="532" cy:directed="1"/>
      <edge id="1554" label="P16054 (pp) Q9CQ62" source="447" target="605" cy:directed="1"/>
      <edge id="1553" label="P16054 (pp) Q9CQA3" source="447" target="578" cy:directed="1"/>
      <edge id="1552" label="P16054 (pp) P17182" source="447" target="375" cy:directed="1"/>
      <edge id="1551" label="P16054 (pp) P67778" source="447" target="629" cy:directed="1"/>
      <edge id="1550" label="P16054 (pp) P05480" source="447" target="546" cy:directed="1"/>
      <edge id="1549" label="P09671 (pp) Q9CQH3" source="446" target="650" cy:directed="1"/>
      <edge id="1548" label="P09671 (pp) P09411" source="446" target="592" cy:directed="1"/>
      <edge id="1547" label="P09671 (pp) Q91VD9" source="446" target="625" cy:directed="1"/>
      <edge id="1546" label="P09671 (pp) Q9D6J6" source="446" target="683" cy:directed="1"/>
      <edge id="1545" label="P09671 (pp) Q9CPP6" source="446" target="609" cy:directed="1"/>
      <edge id="1544" label="P09671 (pp) Q9D2G2" source="446" target="603" cy:directed="1"/>
      <edge id="1543" label="P09671 (pp) P06745" source="446" target="426" cy:directed="1"/>
      <edge id="1542" label="P09671 (pp) P99029" source="446" target="534" cy:directed="1"/>
      <edge id="1541" label="P09671 (pp) Q9CQQ7" source="446" target="481" cy:directed="1"/>
      <edge id="1540" label="P09671 (pp) O70325" source="446" target="588" cy:directed="1"/>
      <edge id="1539" label="P09671 (pp) Q9CXZ1" source="446" target="494" cy:directed="1"/>
      <edge id="1538" label="P09671 (pp) P63038" source="446" target="643" cy:directed="1"/>
      <edge id="1537" label="P09671 (pp) Q9DC70" source="446" target="618" cy:directed="1"/>
      <edge id="1536" label="P09671 (pp) P08249" source="446" target="655" cy:directed="1"/>
      <edge id="1535" label="P09671 (pp) Q9DC69" source="446" target="483" cy:directed="1"/>
      <edge id="1534" label="P09671 (pp) Q9DCD0" source="446" target="668" cy:directed="1"/>
      <edge id="1533" label="P09671 (pp) Q91YT0" source="446" target="511" cy:directed="1"/>
      <edge id="1532" label="P09671 (pp) P52503" source="446" target="538" cy:directed="1"/>
      <edge id="1531" label="P09671 (pp) Q99LX0" source="446" target="573" cy:directed="1"/>
      <edge id="1530" label="P09671 (pp) Q9D0M3" source="446" target="640" cy:directed="1"/>
      <edge id="1529" label="P09671 (pp) Q64521" source="446" target="465" cy:directed="1"/>
      <edge id="1528" label="P09671 (pp) Q80Y14" source="446" target="288" cy:directed="1"/>
      <edge id="1527" label="P09671 (pp) Q9D6J5" source="446" target="403" cy:directed="1"/>
      <edge id="1526" label="P09671 (pp) P17751" source="446" target="593" cy:directed="1"/>
      <edge id="1525" label="P09671 (pp) Q8K3J1" source="446" target="486" cy:directed="1"/>
      <edge id="1524" label="P09671 (pp) P97807" source="446" target="550" cy:directed="1"/>
      <edge id="1523" label="P09671 (pp) Q9DCJ5" source="446" target="510" cy:directed="1"/>
      <edge id="1522" label="P09671 (pp) P20108" source="446" target="463" cy:directed="1"/>
      <edge id="1521" label="P09671 (pp) Q9CR68" source="446" target="623" cy:directed="1"/>
      <edge id="1520" label="P09671 (pp) Q9CQA3" source="446" target="578" cy:directed="1"/>
      <edge id="1519" label="P09671 (pp) Q9QUH0" source="446" target="464" cy:directed="1"/>
      <edge id="1518" label="P09671 (pp) Q03265" source="446" target="678" cy:directed="1"/>
      <edge id="1517" label="P09671 (pp) Q9WUM5" source="446" target="614" cy:directed="1"/>
      <edge id="1516" label="P09671 (pp) Q99KI0" source="446" target="552" cy:directed="1"/>
      <edge id="1515" label="P18572 (pp) O35465" source="445" target="444" cy:directed="1"/>
      <edge id="1514" label="Q8BPN8 (pp) P70404" source="443" target="596" cy:directed="1"/>
      <edge id="1513" label="Q8BPN8 (pp) P28660" source="443" target="508" cy:directed="1"/>
      <edge id="1512" label="Q8BPN8 (pp) Q9WUA3" source="443" target="380" cy:directed="1"/>
      <edge id="1511" label="Q8BPN8 (pp) P63318" source="443" target="224" cy:directed="1"/>
      <edge id="1510" label="Q8BPN8 (pp) Q9Z1G3" source="443" target="666" cy:directed="1"/>
      <edge id="1509" label="Q8BPN8 (pp) P12382" source="443" target="676" cy:directed="1"/>
      <edge id="1508" label="Q8BPN8 (pp) Q5SQX6" source="443" target="287" cy:directed="1"/>
      <edge id="1507" label="Q9CQ92 (pp) Q8K1M6" source="441" target="440" cy:directed="1"/>
      <edge id="1506" label="Q9CQ92 (pp) Q6PCP5" source="441" target="405" cy:directed="1"/>
      <edge id="1505" label="Q9CQ92 (pp) Q8BZ98" source="441" target="206" cy:directed="1"/>
      <edge id="1504" label="Q9DBL1 (pp) Q8BMS1" source="439" target="374" cy:directed="1"/>
      <edge id="1503" label="P53395 (pp) Q9JHI5" source="438" target="437" cy:directed="1"/>
      <edge id="1502" label="P53395 (pp) O08749" source="438" target="682" cy:directed="1"/>
      <edge id="1501" label="P53395 (pp) Q9WUM5" source="438" target="614" cy:directed="1"/>
      <edge id="1500" label="P53395 (pp) P35486" source="438" target="451" cy:directed="1"/>
      <edge id="1499" label="P53395 (pp) Q8K2B3" source="438" target="543" cy:directed="1"/>
      <edge id="1498" label="P53395 (pp) Q60597" source="438" target="379" cy:directed="1"/>
      <edge id="1497" label="P53395 (pp) Q99MN9" source="438" target="456" cy:directed="1"/>
      <edge id="1496" label="P53395 (pp) Q9D051" source="438" target="681" cy:directed="1"/>
      <edge id="1495" label="P53395 (pp) Q3ULD5" source="438" target="540" cy:directed="1"/>
      <edge id="1494" label="P53395 (pp) Q9DBL1" source="438" target="439" cy:directed="1"/>
      <edge id="1493" label="Q9JHI5 (pp) Q8BMS1" source="437" target="374" cy:directed="1"/>
      <edge id="1492" label="Q9JHI5 (pp) Q99MR8" source="437" target="265" cy:directed="1"/>
      <edge id="1491" label="Q9JHI5 (pp) Q61425" source="437" target="576" cy:directed="1"/>
      <edge id="1490" label="Q9JHI5 (pp) Q99LC5" source="437" target="575" cy:directed="1"/>
      <edge id="1489" label="Q93092 (pp) P52480" source="436" target="435" cy:directed="1"/>
      <edge id="1488" label="Q93092 (pp) P47857" source="436" target="359" cy:directed="1"/>
      <edge id="1487" label="Q93092 (pp) P06151" source="436" target="652" cy:directed="1"/>
      <edge id="1486" label="Q93092 (pp) Q9DCD0" source="436" target="668" cy:directed="1"/>
      <edge id="1485" label="Q93092 (pp) P17182" source="436" target="375" cy:directed="1"/>
      <edge id="1484" label="Q93092 (pp) Q9WUA3" source="436" target="380" cy:directed="1"/>
      <edge id="1483" label="Q93092 (pp) P17710" source="436" target="568" cy:directed="1"/>
      <edge id="1482" label="Q93092 (pp) Q9D0F9" source="436" target="255" cy:directed="1"/>
      <edge id="1481" label="Q93092 (pp) P06745" source="436" target="426" cy:directed="1"/>
      <edge id="1480" label="Q93092 (pp) P05064" source="436" target="569" cy:directed="1"/>
      <edge id="1479" label="Q93092 (pp) P05063" source="436" target="378" cy:directed="1"/>
      <edge id="1478" label="Q93092 (pp) P97807" source="436" target="550" cy:directed="1"/>
      <edge id="1477" label="P52480 (pp) P54071" source="435" target="653" cy:directed="1"/>
      <edge id="1476" label="P52480 (pp) P17182" source="435" target="375" cy:directed="1"/>
      <edge id="1475" label="P52480 (pp) Q9R0Y5" source="435" target="318" cy:directed="1"/>
      <edge id="1474" label="P52480 (pp) P47857" source="435" target="359" cy:directed="1"/>
      <edge id="1473" label="P52480 (pp) Q9WUA3" source="435" target="380" cy:directed="1"/>
      <edge id="1472" label="P52480 (pp) Q8BH04" source="435" target="266" cy:directed="1"/>
      <edge id="1471" label="P52480 (pp) P05063" source="435" target="378" cy:directed="1"/>
      <edge id="1470" label="P52480 (pp) P09411" source="435" target="592" cy:directed="1"/>
      <edge id="1469" label="P52480 (pp) Q9DCD0" source="435" target="668" cy:directed="1"/>
      <edge id="1468" label="P52480 (pp) P06151" source="435" target="652" cy:directed="1"/>
      <edge id="1467" label="P52480 (pp) Q9WUB3" source="435" target="253" cy:directed="1"/>
      <edge id="1466" label="P52480 (pp) Q05920" source="435" target="636" cy:directed="1"/>
      <edge id="1465" label="P52480 (pp) P05064" source="435" target="569" cy:directed="1"/>
      <edge id="1464" label="P52480 (pp) P06745" source="435" target="426" cy:directed="1"/>
      <edge id="1463" label="P52480 (pp) P17710" source="435" target="568" cy:directed="1"/>
      <edge id="1462" label="Q9DB05 (pp) P46460" source="434" target="607" cy:directed="1"/>
      <edge id="1461" label="Q61301 (pp) P15116" source="433" target="384" cy:directed="1"/>
      <edge id="1460" label="Q9Z2I9 (pp) Q60597" source="432" target="379" cy:directed="1"/>
      <edge id="1459" label="Q9Z2I9 (pp) Q9WUM5" source="432" target="614" cy:directed="1"/>
      <edge id="1458" label="Q9Z2I9 (pp) P23506" source="432" target="404" cy:directed="1"/>
      <edge id="1457" label="Q9Z2I9 (pp) Q91VD9" source="432" target="625" cy:directed="1"/>
      <edge id="1456" label="Q9Z2I9 (pp) Q8CAQ8" source="432" target="337" cy:directed="1"/>
      <edge id="1455" label="Q9Z2I9 (pp) Q03265" source="432" target="678" cy:directed="1"/>
      <edge id="1454" label="Q9Z2I9 (pp) Q8R4N0" source="432" target="539" cy:directed="1"/>
      <edge id="1453" label="Q9Z2I9 (pp) P50516" source="432" target="597" cy:directed="1"/>
      <edge id="1452" label="Q9Z2I9 (pp) Q9D2G2" source="432" target="603" cy:directed="1"/>
      <edge id="1451" label="Q9Z2I9 (pp) Q9D023" source="432" target="474" cy:directed="1"/>
      <edge id="1450" label="Q9Z2I9 (pp) P97807" source="432" target="550" cy:directed="1"/>
      <edge id="1449" label="Q9Z2I9 (pp) Q99LC5" source="432" target="575" cy:directed="1"/>
      <edge id="1448" label="P50544 (pp) P41216" source="431" target="262" cy:directed="1"/>
      <edge id="1447" label="P50544 (pp) Q91WC3" source="431" target="268" cy:directed="1"/>
      <edge id="1446" label="P50544 (pp) Q8BMS1" source="431" target="374" cy:directed="1"/>
      <edge id="1445" label="Q61831 (pp) P35438" source="430" target="675" cy:directed="1"/>
      <edge id="1444" label="Q61831 (pp) Q01097" source="430" target="686" cy:directed="1"/>
      <edge id="1443" label="P63040 (pp) P63044" source="429" target="490" cy:directed="1"/>
      <edge id="1442" label="Q923T9 (pp) P35436" source="428" target="670" cy:directed="1"/>
      <edge id="1441" label="Q923T9 (pp) P63101" source="428" target="411" cy:directed="1"/>
      <edge id="1440" label="Q920I9 (pp) Q8BPN8" source="427" target="443" cy:directed="1"/>
      <edge id="1439" label="P06745 (pp) P05064" source="426" target="569" cy:directed="1"/>
      <edge id="1438" label="P06745 (pp) Q9WUA3" source="426" target="380" cy:directed="1"/>
      <edge id="1437" label="P06745 (pp) Q9WUM5" source="426" target="614" cy:directed="1"/>
      <edge id="1436" label="P06745 (pp) Q05920" source="426" target="636" cy:directed="1"/>
      <edge id="1435" label="P06745 (pp) P47857" source="426" target="359" cy:directed="1"/>
      <edge id="1434" label="P06745 (pp) O55023" source="426" target="248" cy:directed="1"/>
      <edge id="1433" label="P06745 (pp) P17182" source="426" target="375" cy:directed="1"/>
      <edge id="1432" label="P06745 (pp) Q9DCD0" source="426" target="668" cy:directed="1"/>
      <edge id="1431" label="P06745 (pp) Q9D0F9" source="426" target="255" cy:directed="1"/>
      <edge id="1430" label="P06745 (pp) P06151" source="426" target="652" cy:directed="1"/>
      <edge id="1429" label="P06745 (pp) P16858" source="426" target="331" cy:directed="1"/>
      <edge id="1428" label="P06745 (pp) P09411" source="426" target="592" cy:directed="1"/>
      <edge id="1427" label="P06745 (pp) P05063" source="426" target="378" cy:directed="1"/>
      <edge id="1426" label="P06745 (pp) P17710" source="426" target="568" cy:directed="1"/>
      <edge id="1425" label="Q3UTJ2 (pp) Q7TPR4" source="425" target="424" cy:directed="1"/>
      <edge id="1424" label="Q3UTJ2 (pp) O08917" source="425" target="148" cy:directed="1"/>
      <edge id="1423" label="Q7TPR4 (pp) Q2PFD7" source="424" target="140" cy:directed="1"/>
      <edge id="1422" label="P61264 (pp) P63044" source="423" target="490" cy:directed="1"/>
      <edge id="1421" label="P70441 (pp) P26040" source="422" target="421" cy:directed="1"/>
      <edge id="1420" label="P26040 (pp) P11627" source="421" target="329" cy:directed="1"/>
      <edge id="1419" label="Q9EP69 (pp) Q62420" source="420" target="419" cy:directed="1"/>
      <edge id="1418" label="Q9EP69 (pp) Q68FD5" source="420" target="514" cy:directed="1"/>
      <edge id="1417" label="Q9EP69 (pp) Q8CHC4" source="420" target="251" cy:directed="1"/>
      <edge id="1416" label="Q62420 (pp) O08585" source="419" target="283" cy:directed="1"/>
      <edge id="1415" label="Q62420 (pp) P39053" source="419" target="393" cy:directed="1"/>
      <edge id="1414" label="P43024 (pp) Q9CQ69" source="418" target="656" cy:directed="1"/>
      <edge id="1413" label="P43024 (pp) Q91VR2" source="418" target="627" cy:directed="1"/>
      <edge id="1412" label="P43024 (pp) P00405" source="418" target="221" cy:directed="1"/>
      <edge id="1411" label="P43024 (pp) Q9D3D9" source="418" target="680" cy:directed="1"/>
      <edge id="1410" label="P43024 (pp) Q9DCX2" source="418" target="524" cy:directed="1"/>
      <edge id="1409" label="P43024 (pp) P56391" source="418" target="559" cy:directed="1"/>
      <edge id="1408" label="P43024 (pp) Q9ERS2" source="418" target="551" cy:directed="1"/>
      <edge id="1407" label="P14873 (pp) P62259" source="417" target="665" cy:directed="1"/>
      <edge id="1406" label="P14873 (pp) P63005" source="417" target="584" cy:directed="1"/>
      <edge id="1405" label="P14873 (pp) Q9QYR6" source="417" target="282" cy:directed="1"/>
      <edge id="1404" label="P09103 (pp) P63038" source="416" target="643" cy:directed="1"/>
      <edge id="1403" label="P09103 (pp) P04925" source="416" target="505" cy:directed="1"/>
      <edge id="1402" label="P09103 (pp) Q922R8" source="416" target="357" cy:directed="1"/>
      <edge id="1401" label="P56382 (pp) P97450" source="415" target="460" cy:directed="1"/>
      <edge id="1400" label="P56382 (pp) Q06185" source="415" target="619" cy:directed="1"/>
      <edge id="1399" label="P56382 (pp) Q9DCX2" source="415" target="524" cy:directed="1"/>
      <edge id="1398" label="P56382 (pp) Q99LX0" source="415" target="573" cy:directed="1"/>
      <edge id="1397" label="P56382 (pp) Q9DB20" source="415" target="651" cy:directed="1"/>
      <edge id="1396" label="P56382 (pp) Q9CQQ7" source="415" target="481" cy:directed="1"/>
      <edge id="1395" label="P56382 (pp) P03930" source="415" target="502" cy:directed="1"/>
      <edge id="1394" label="P56382 (pp) Q9CQZ5" source="415" target="684" cy:directed="1"/>
      <edge id="1393" label="P56382 (pp) Q9D3D9" source="415" target="680" cy:directed="1"/>
      <edge id="1392" label="P56382 (pp) P56480" source="415" target="632" cy:directed="1"/>
      <edge id="1391" label="P56382 (pp) Q91VR2" source="415" target="627" cy:directed="1"/>
      <edge id="1390" label="P56382 (pp) Q91VM9" source="415" target="484" cy:directed="1"/>
      <edge id="1389" label="P56382 (pp) Q03265" source="415" target="678" cy:directed="1"/>
      <edge id="1388" label="Q3UMR5 (pp) P50516" source="414" target="597" cy:directed="1"/>
      <edge id="1387" label="Q91ZA3 (pp) Q9EQ20" source="413" target="528" cy:directed="1"/>
      <edge id="1386" label="Q91ZA3 (pp) Q99JY0" source="413" target="506" cy:directed="1"/>
      <edge id="1385" label="Q61879 (pp) P63101" source="412" target="411" cy:directed="1"/>
      <edge id="1384" label="Q61879 (pp) P35438" source="412" target="675" cy:directed="1"/>
      <edge id="1383" label="P63101 (pp) P62482" source="411" target="305" cy:directed="1"/>
      <edge id="1382" label="P63101 (pp) P63328" source="411" target="275" cy:directed="1"/>
      <edge id="1381" label="P63101 (pp) Q62465" source="411" target="254" cy:directed="1"/>
      <edge id="1380" label="P63101 (pp) O88935" source="411" target="459" cy:directed="1"/>
      <edge id="1379" label="P63101 (pp) P46660" source="411" target="489" cy:directed="1"/>
      <edge id="1378" label="P63101 (pp) P28740" source="411" target="198" cy:directed="1"/>
      <edge id="1377" label="P63101 (pp) Q925I1" source="411" target="301" cy:directed="1"/>
      <edge id="1376" label="P63101 (pp) Q7TSJ2" source="411" target="170" cy:directed="1"/>
      <edge id="1375" label="P63101 (pp) P28652" source="411" target="314" cy:directed="1"/>
      <edge id="1374" label="P63101 (pp) P16330" source="411" target="325" cy:directed="1"/>
      <edge id="1373" label="P63101 (pp) P12367" source="411" target="473" cy:directed="1"/>
      <edge id="1372" label="P63101 (pp) P60469" source="411" target="277" cy:directed="1"/>
      <edge id="1371" label="P63101 (pp) P30999" source="411" target="306" cy:directed="1"/>
      <edge id="1370" label="P63101 (pp) Q9R0K7" source="411" target="467" cy:directed="1"/>
      <edge id="1369" label="P63101 (pp) Q920I9" source="411" target="427" cy:directed="1"/>
      <edge id="1368" label="P63101 (pp) Q60875" source="411" target="249" cy:directed="1"/>
      <edge id="1367" label="P63101 (pp) F6SEU4" source="411" target="127" cy:directed="1"/>
      <edge id="1366" label="P63101 (pp) P13020" source="411" target="113" cy:directed="1"/>
      <edge id="1365" label="P63101 (pp) P16546" source="411" target="662" cy:directed="1"/>
      <edge id="1364" label="P63101 (pp) Q8BPN8" source="411" target="443" cy:directed="1"/>
      <edge id="1363" label="P63101 (pp) P47757" source="411" target="664" cy:directed="1"/>
      <edge id="1362" label="P63101 (pp) P17156" source="411" target="312" cy:directed="1"/>
      <edge id="1361" label="P63101 (pp) Q80U28" source="411" target="231" cy:directed="1"/>
      <edge id="1360" label="P63101 (pp) P08553" source="411" target="173" cy:directed="1"/>
      <edge id="1359" label="P63101 (pp) P20357" source="411" target="270" cy:directed="1"/>
      <edge id="1358" label="P63101 (pp) P10637" source="411" target="356" cy:directed="1"/>
      <edge id="1357" label="P63101 (pp) Q64332" source="411" target="292" cy:directed="1"/>
      <edge id="1356" label="Q9QWI6 (pp) Q8R001" source="410" target="409" cy:directed="1"/>
      <edge id="1355" label="Q9QWI6 (pp) P05480" source="410" target="546" cy:directed="1"/>
      <edge id="1354" label="Q9QWI6 (pp) Q68FF6" source="410" target="307" cy:directed="1"/>
      <edge id="1353" label="Q8VDN2 (pp) P23819" source="406" target="671" cy:directed="1"/>
      <edge id="1352" label="Q8VDN2 (pp) P60879" source="406" target="509" cy:directed="1"/>
      <edge id="1351" label="Q8VDN2 (pp) P70414" source="406" target="315" cy:directed="1"/>
      <edge id="1350" label="Q8VDN2 (pp) P63044" source="406" target="490" cy:directed="1"/>
      <edge id="1349" label="Q8VDN2 (pp) Q01097" source="406" target="686" cy:directed="1"/>
      <edge id="1348" label="Q8VDN2 (pp) P14094" source="406" target="454" cy:directed="1"/>
      <edge id="1347" label="Q8VDN2 (pp) P35438" source="406" target="675" cy:directed="1"/>
      <edge id="1346" label="Q6PCP5 (pp) P23506" source="405" target="404" cy:directed="1"/>
      <edge id="1345" label="P23506 (pp) Q9CQH3" source="404" target="650" cy:directed="1"/>
      <edge id="1344" label="Q9D6J5 (pp) Q91VR2" source="403" target="627" cy:directed="1"/>
      <edge id="1343" label="Q9D6J5 (pp) Q91VD9" source="403" target="625" cy:directed="1"/>
      <edge id="1342" label="Q9D6J5 (pp) Q9CQ54" source="403" target="658" cy:directed="1"/>
      <edge id="1341" label="Q9D6J5 (pp) Q9Z1P6" source="403" target="591" cy:directed="1"/>
      <edge id="1340" label="Q9D6J5 (pp) Q9CQH3" source="403" target="650" cy:directed="1"/>
      <edge id="1339" label="Q9D6J5 (pp) Q99LX0" source="403" target="573" cy:directed="1"/>
      <edge id="1338" label="Q9D6J5 (pp) Q8K3J1" source="403" target="486" cy:directed="1"/>
      <edge id="1337" label="Q9D6J5 (pp) Q9D6J6" source="403" target="683" cy:directed="1"/>
      <edge id="1336" label="Q9D6J5 (pp) Q9CZ13" source="403" target="641" cy:directed="1"/>
      <edge id="1335" label="Q9D6J5 (pp) Q06185" source="403" target="619" cy:directed="1"/>
      <edge id="1334" label="Q9D6J5 (pp) Q3UIU2" source="403" target="602" cy:directed="1"/>
      <edge id="1333" label="Q9D6J5 (pp) Q9DCS9" source="403" target="624" cy:directed="1"/>
      <edge id="1332" label="Q9D6J5 (pp) Q99LC3" source="403" target="639" cy:directed="1"/>
      <edge id="1331" label="Q9D6J5 (pp) Q9DB77" source="403" target="485" cy:directed="1"/>
      <edge id="1330" label="Q9D6J5 (pp) Q9CQ69" source="403" target="656" cy:directed="1"/>
      <edge id="1329" label="Q9D6J5 (pp) Q9DCJ5" source="403" target="510" cy:directed="1"/>
      <edge id="1328" label="Q9D6J5 (pp) Q9ERS2" source="403" target="551" cy:directed="1"/>
      <edge id="1327" label="Q9D6J5 (pp) O09111" source="403" target="679" cy:directed="1"/>
      <edge id="1326" label="Q9D6J5 (pp) Q9CQZ6" source="403" target="659" cy:directed="1"/>
      <edge id="1325" label="Q9D6J5 (pp) Q9CQQ7" source="403" target="481" cy:directed="1"/>
      <edge id="1324" label="Q9D6J5 (pp) Q9D3D9" source="403" target="680" cy:directed="1"/>
      <edge id="1323" label="Q9D6J5 (pp) Q9DC69" source="403" target="483" cy:directed="1"/>
      <edge id="1322" label="Q9D6J5 (pp) Q91YT0" source="403" target="511" cy:directed="1"/>
      <edge id="1321" label="Q9D6J5 (pp) Q9CPQ8" source="403" target="626" cy:directed="1"/>
      <edge id="1320" label="Q00612 (pp) Q93092" source="402" target="436" cy:directed="1"/>
      <edge id="1319" label="Q00612 (pp) P40142" source="402" target="531" cy:directed="1"/>
      <edge id="1318" label="Q00612 (pp) P09671" source="402" target="446" cy:directed="1"/>
      <edge id="1317" label="Q00612 (pp) P97807" source="402" target="550" cy:directed="1"/>
      <edge id="1316" label="Q00612 (pp) P17751" source="402" target="593" cy:directed="1"/>
      <edge id="1315" label="Q00612 (pp) Q9DCD0" source="402" target="668" cy:directed="1"/>
      <edge id="1314" label="Q00612 (pp) P06745" source="402" target="426" cy:directed="1"/>
      <edge id="1313" label="Q9WTT4 (pp) P50516" source="401" target="597" cy:directed="1"/>
      <edge id="1312" label="Q9WTT4 (pp) P63082" source="401" target="442" cy:directed="1"/>
      <edge id="1311" label="Q5FWK3 (pp) P63005" source="400" target="584" cy:directed="1"/>
      <edge id="1310" label="Q5FWK3 (pp) Q9QUI0" source="400" target="673" cy:directed="1"/>
      <edge id="1309" label="Q9CVB6 (pp) Q9JM76" source="397" target="512" cy:directed="1"/>
      <edge id="1308" label="Q9CVB6 (pp) Q9CPW4" source="397" target="376" cy:directed="1"/>
      <edge id="1307" label="Q9CVB6 (pp) P67871" source="397" target="228" cy:directed="1"/>
      <edge id="1306" label="Q9CVB6 (pp) Q9R0Q6" source="397" target="513" cy:directed="1"/>
      <edge id="1305" label="Q9CVB6 (pp) P60710" source="397" target="548" cy:directed="1"/>
      <edge id="1304" label="Q9CVB6 (pp) Q99JY9" source="397" target="455" cy:directed="1"/>
      <edge id="1303" label="Q9CVB6 (pp) Q9D898" source="397" target="469" cy:directed="1"/>
      <edge id="1302" label="Q9CVB6 (pp) P47757" source="397" target="664" cy:directed="1"/>
      <edge id="1301" label="Q9CVB6 (pp) P59999" source="397" target="398" cy:directed="1"/>
      <edge id="1300" label="Q9CQC7 (pp) Q9CQ54" source="396" target="658" cy:directed="1"/>
      <edge id="1299" label="Q9CQC7 (pp) Q06185" source="396" target="619" cy:directed="1"/>
      <edge id="1298" label="Q9CQC7 (pp) Q9Z1P6" source="396" target="591" cy:directed="1"/>
      <edge id="1297" label="Q9CQC7 (pp) Q9DC69" source="396" target="483" cy:directed="1"/>
      <edge id="1296" label="Q9CQC7 (pp) Q9CQZ6" source="396" target="659" cy:directed="1"/>
      <edge id="1295" label="Q9CQC7 (pp) Q9DCJ5" source="396" target="510" cy:directed="1"/>
      <edge id="1294" label="Q9CQC7 (pp) Q9CQH3" source="396" target="650" cy:directed="1"/>
      <edge id="1293" label="Q9CQC7 (pp) Q8K3J1" source="396" target="486" cy:directed="1"/>
      <edge id="1292" label="Q9CQC7 (pp) Q9D6J5" source="396" target="403" cy:directed="1"/>
      <edge id="1291" label="Q9CQC7 (pp) Q99LY9" source="396" target="638" cy:directed="1"/>
      <edge id="1290" label="Q9CQC7 (pp) Q62425" source="396" target="345" cy:directed="1"/>
      <edge id="1289" label="Q9CQC7 (pp) Q99LC3" source="396" target="639" cy:directed="1"/>
      <edge id="1288" label="Q9CQC7 (pp) Q3UIU2" source="396" target="602" cy:directed="1"/>
      <edge id="1287" label="Q9CQC7 (pp) Q9DCS9" source="396" target="624" cy:directed="1"/>
      <edge id="1286" label="Q9CQC7 (pp) Q91YT0" source="396" target="511" cy:directed="1"/>
      <edge id="1285" label="Q9CQC7 (pp) Q9CQQ7" source="396" target="481" cy:directed="1"/>
      <edge id="1284" label="Q9CQC7 (pp) Q9D6J6" source="396" target="683" cy:directed="1"/>
      <edge id="1283" label="O88737 (pp) Q6PH08" source="395" target="394" cy:directed="1"/>
      <edge id="1282" label="O88737 (pp) Q99NE5" source="395" target="154" cy:directed="1"/>
      <edge id="1281" label="Q6PH08 (pp) P62259" source="394" target="665" cy:directed="1"/>
      <edge id="1280" label="Q6PH08 (pp) Q99NE5" source="394" target="154" cy:directed="1"/>
      <edge id="1279" label="P39053 (pp) P04925" source="393" target="505" cy:directed="1"/>
      <edge id="1278" label="P39053 (pp) Q68FD5" source="393" target="514" cy:directed="1"/>
      <edge id="1277" label="P39053 (pp) P17426" source="393" target="599" cy:directed="1"/>
      <edge id="1276" label="P39053 (pp) P28740" source="393" target="198" cy:directed="1"/>
      <edge id="1275" label="P39053 (pp) P35438" source="393" target="675" cy:directed="1"/>
      <edge id="1274" label="P39053 (pp) O08539" source="393" target="294" cy:directed="1"/>
      <edge id="1273" label="P39053 (pp) Q9CQ92" source="393" target="441" cy:directed="1"/>
      <edge id="1272" label="P39053 (pp) Q8CHC4" source="393" target="251" cy:directed="1"/>
      <edge id="1271" label="Q6PB66 (pp) P68510" source="392" target="677" cy:directed="1"/>
      <edge id="1270" label="P31324 (pp) Q8BR92" source="391" target="390" cy:directed="1"/>
      <edge id="1269" label="P31324 (pp) P12367" source="391" target="473" cy:directed="1"/>
      <edge id="1268" label="P31324 (pp) P20357" source="391" target="270" cy:directed="1"/>
      <edge id="1267" label="P31324 (pp) P63101" source="391" target="411" cy:directed="1"/>
      <edge id="1266" label="P31324 (pp) P35438" source="391" target="675" cy:directed="1"/>
      <edge id="1265" label="P31324 (pp) P68181" source="391" target="259" cy:directed="1"/>
      <edge id="1264" label="P97772 (pp) Q3UHD9" source="389" target="649" cy:directed="1"/>
      <edge id="1263" label="P97772 (pp) P35438" source="389" target="675" cy:directed="1"/>
      <edge id="1262" label="Q8CHT0 (pp) P29758" source="388" target="387" cy:directed="1"/>
      <edge id="1261" label="Q8CHT0 (pp) Q9DBF1" source="388" target="408" cy:directed="1"/>
      <edge id="1260" label="Q8CHT0 (pp) P15105" source="388" target="608" cy:directed="1"/>
      <edge id="1259" label="P29758 (pp) P12023" source="387" target="565" cy:directed="1"/>
      <edge id="1258" label="P29758 (pp) P15105" source="387" target="608" cy:directed="1"/>
      <edge id="1257" label="Q99L47 (pp) P63038" source="386" target="643" cy:directed="1"/>
      <edge id="1256" label="Q7TQF7 (pp) P17427" source="385" target="600" cy:directed="1"/>
      <edge id="1255" label="Q7TQF7 (pp) Q68FD5" source="385" target="514" cy:directed="1"/>
      <edge id="1254" label="Q7TQF7 (pp) Q9EP69" source="385" target="420" cy:directed="1"/>
      <edge id="1253" label="Q7TQF7 (pp) Q8CHC4" source="385" target="251" cy:directed="1"/>
      <edge id="1252" label="Q7TQF7 (pp) P39053" source="385" target="393" cy:directed="1"/>
      <edge id="1251" label="Q7TQF7 (pp) Q9DBG3" source="385" target="354" cy:directed="1"/>
      <edge id="1250" label="Q7TQF7 (pp) Q8BZ98" source="385" target="206" cy:directed="1"/>
      <edge id="1249" label="Q7TQF7 (pp) Q62420" source="385" target="419" cy:directed="1"/>
      <edge id="1248" label="P15116 (pp) Q02248" source="384" target="547" cy:directed="1"/>
      <edge id="1247" label="P15116 (pp) P35438" source="384" target="675" cy:directed="1"/>
      <edge id="1246" label="P15116 (pp) P23242" source="384" target="158" cy:directed="1"/>
      <edge id="1245" label="P15116 (pp) P30999" source="384" target="306" cy:directed="1"/>
      <edge id="1244" label="P06837 (pp) P62204" source="383" target="311" cy:directed="1"/>
      <edge id="1243" label="P07901 (pp) P61982" source="382" target="381" cy:directed="1"/>
      <edge id="1242" label="P07901 (pp) P11499" source="382" target="570" cy:directed="1"/>
      <edge id="1241" label="P07901 (pp) P63037" source="382" target="611" cy:directed="1"/>
      <edge id="1240" label="P07901 (pp) P62259" source="382" target="665" cy:directed="1"/>
      <edge id="1239" label="P07901 (pp) Q9CR16" source="382" target="155" cy:directed="1"/>
      <edge id="1238" label="P07901 (pp) P63038" source="382" target="643" cy:directed="1"/>
      <edge id="1237" label="P07901 (pp) Q99KJ8" source="382" target="554" cy:directed="1"/>
      <edge id="1236" label="P07901 (pp) Q9DC28" source="382" target="238" cy:directed="1"/>
      <edge id="1235" label="P07901 (pp) Q60864" source="382" target="516" cy:directed="1"/>
      <edge id="1234" label="P07901 (pp) Q61699" source="382" target="172" cy:directed="1"/>
      <edge id="1233" label="P61982 (pp) P63101" source="381" target="411" cy:directed="1"/>
      <edge id="1232" label="P61982 (pp) P62259" source="381" target="665" cy:directed="1"/>
      <edge id="1231" label="P61982 (pp) Q9DC28" source="381" target="238" cy:directed="1"/>
      <edge id="1230" label="P61982 (pp) P10637" source="381" target="356" cy:directed="1"/>
      <edge id="1229" label="P61982 (pp) P35438" source="381" target="675" cy:directed="1"/>
      <edge id="1228" label="Q9WUA3 (pp) P63101" source="380" target="411" cy:directed="1"/>
      <edge id="1227" label="P05063 (pp) Q9WUA3" source="378" target="380" cy:directed="1"/>
      <edge id="1226" label="P05063 (pp) P17710" source="378" target="568" cy:directed="1"/>
      <edge id="1225" label="P05063 (pp) Q91VR2" source="378" target="627" cy:directed="1"/>
      <edge id="1224" label="P05063 (pp) P17182" source="378" target="375" cy:directed="1"/>
      <edge id="1223" label="Q8BKZ9 (pp) Q8BMF4" source="377" target="637" cy:directed="1"/>
      <edge id="1222" label="Q8BKZ9 (pp) P35486" source="377" target="451" cy:directed="1"/>
      <edge id="1221" label="Q8BKZ9 (pp) Q922H2" source="377" target="199" cy:directed="1"/>
      <edge id="1220" label="Q8BKZ9 (pp) Q9D051" source="377" target="681" cy:directed="1"/>
      <edge id="1219" label="Q8BKZ9 (pp) Q60597" source="377" target="379" cy:directed="1"/>
      <edge id="1218" label="Q8BKZ9 (pp) P97807" source="377" target="550" cy:directed="1"/>
      <edge id="1217" label="Q9CPW4 (pp) P59999" source="376" target="398" cy:directed="1"/>
      <edge id="1216" label="Q9CPW4 (pp) Q9JM76" source="376" target="512" cy:directed="1"/>
      <edge id="1215" label="P17182 (pp) P63101" source="375" target="411" cy:directed="1"/>
      <edge id="1214" label="P17182 (pp) Q9WUA3" source="375" target="380" cy:directed="1"/>
      <edge id="1213" label="P17182 (pp) Q9DCD0" source="375" target="668" cy:directed="1"/>
      <edge id="1212" label="Q9Z268 (pp) Q06335" source="373" target="672" cy:directed="1"/>
      <edge id="1211" label="Q8BGD5 (pp) P50544" source="372" target="431" cy:directed="1"/>
      <edge id="1210" label="P42125 (pp) Q9Z1P6" source="371" target="591" cy:directed="1"/>
      <edge id="1209" label="P42125 (pp) Q9JHI5" source="371" target="437" cy:directed="1"/>
      <edge id="1208" label="P42125 (pp) Q8BMS1" source="371" target="374" cy:directed="1"/>
      <edge id="1207" label="P42125 (pp) O09111" source="371" target="679" cy:directed="1"/>
      <edge id="1206" label="P42125 (pp) Q61425" source="371" target="576" cy:directed="1"/>
      <edge id="1205" label="P42125 (pp) P51174" source="371" target="498" cy:directed="1"/>
      <edge id="1204" label="P42125 (pp) Q99LC5" source="371" target="575" cy:directed="1"/>
      <edge id="1203" label="P42125 (pp) Q9DCJ5" source="371" target="510" cy:directed="1"/>
      <edge id="1202" label="P42125 (pp) O08756" source="371" target="507" cy:directed="1"/>
      <edge id="1201" label="P42125 (pp) Q9CQ62" source="371" target="605" cy:directed="1"/>
      <edge id="1200" label="P42125 (pp) Q91YT0" source="371" target="511" cy:directed="1"/>
      <edge id="1199" label="P42125 (pp) Q8BH95" source="371" target="642" cy:directed="1"/>
      <edge id="1198" label="P42125 (pp) Q8K1Z0" source="371" target="571" cy:directed="1"/>
      <edge id="1197" label="P42125 (pp) Q99JY0" source="371" target="506" cy:directed="1"/>
      <edge id="1196" label="Q61290 (pp) Q8R0S4" source="370" target="369" cy:directed="1"/>
      <edge id="1195" label="Q8R0S4 (pp) Q9D6F9" source="369" target="263" cy:directed="1"/>
      <edge id="1194" label="P08226 (pp) Q91ZX7" source="368" target="367" cy:directed="1"/>
      <edge id="1193" label="P08226 (pp) P04925" source="368" target="505" cy:directed="1"/>
      <edge id="1192" label="P08226 (pp) P12023" source="368" target="565" cy:directed="1"/>
      <edge id="1191" label="P08226 (pp) P10637" source="368" target="356" cy:directed="1"/>
      <edge id="1190" label="P08226 (pp) P20357" source="368" target="270" cy:directed="1"/>
      <edge id="1189" label="Q91ZX7 (pp) P12023" source="367" target="565" cy:directed="1"/>
      <edge id="1188" label="Q91ZX7 (pp) Q9D6K5" source="367" target="104" cy:directed="1"/>
      <edge id="1187" label="Q8BLK3 (pp) P04925" source="366" target="505" cy:directed="1"/>
      <edge id="1186" label="P62835 (pp) P35438" source="365" target="675" cy:directed="1"/>
      <edge id="1185" label="Q6R891 (pp) Q62277" source="364" target="536" cy:directed="1"/>
      <edge id="1184" label="Q6R891 (pp) Q60875" source="364" target="249" cy:directed="1"/>
      <edge id="1183" label="Q6R891 (pp) P63101" source="364" target="411" cy:directed="1"/>
      <edge id="1182" label="P60766 (pp) P63005" source="363" target="584" cy:directed="1"/>
      <edge id="1181" label="P60766 (pp) Q99PT1" source="363" target="457" cy:directed="1"/>
      <edge id="1180" label="P60766 (pp) Q5FWK3" source="363" target="400" cy:directed="1"/>
      <edge id="1179" label="P60766 (pp) Q8BG51" source="363" target="493" cy:directed="1"/>
      <edge id="1178" label="Q99104 (pp) Q01097" source="362" target="686" cy:directed="1"/>
      <edge id="1177" label="Q99104 (pp) P03995" source="362" target="324" cy:directed="1"/>
      <edge id="1176" label="Q99104 (pp) P08551" source="362" target="175" cy:directed="1"/>
      <edge id="1175" label="Q99104 (pp) P63101" source="362" target="411" cy:directed="1"/>
      <edge id="1174" label="Q99104 (pp) P35438" source="362" target="675" cy:directed="1"/>
      <edge id="1173" label="Q62048 (pp) P63085" source="361" target="635" cy:directed="1"/>
      <edge id="1172" label="P47857 (pp) P63101" source="359" target="411" cy:directed="1"/>
      <edge id="1171" label="P47857 (pp) P05064" source="359" target="569" cy:directed="1"/>
      <edge id="1170" label="P47857 (pp) P05063" source="359" target="378" cy:directed="1"/>
      <edge id="1169" label="P47857 (pp) Q9R0Y5" source="359" target="318" cy:directed="1"/>
      <edge id="1168" label="Q922R8 (pp) P12023" source="357" target="565" cy:directed="1"/>
      <edge id="1167" label="P10637 (pp) P12023" source="356" target="565" cy:directed="1"/>
      <edge id="1166" label="P10637 (pp) P04925" source="356" target="505" cy:directed="1"/>
      <edge id="1165" label="P10637 (pp) O55042" source="356" target="274" cy:directed="1"/>
      <edge id="1164" label="P10637 (pp) Q9QXJ1" source="356" target="320" cy:directed="1"/>
      <edge id="1163" label="P10637 (pp) Q9D8Y0" source="356" target="107" cy:directed="1"/>
      <edge id="1162" label="P10637 (pp) Q99LX0" source="356" target="573" cy:directed="1"/>
      <edge id="1161" label="Q9DBG3 (pp) Q6IRU5" source="354" target="353" cy:directed="1"/>
      <edge id="1160" label="Q9DBG3 (pp) O08585" source="354" target="283" cy:directed="1"/>
      <edge id="1159" label="Q9DBG3 (pp) O70161" source="354" target="582" cy:directed="1"/>
      <edge id="1158" label="Q9DBG3 (pp) Q68FD5" source="354" target="514" cy:directed="1"/>
      <edge id="1157" label="Q9DBG3 (pp) P17426" source="354" target="599" cy:directed="1"/>
      <edge id="1156" label="Q9DBG3 (pp) P63101" source="354" target="411" cy:directed="1"/>
      <edge id="1155" label="Q9DBG3 (pp) P62743" source="354" target="233" cy:directed="1"/>
      <edge id="1154" label="Q9DBG3 (pp) P60879" source="354" target="509" cy:directed="1"/>
      <edge id="1153" label="Q9DBG3 (pp) Q80VP1" source="354" target="258" cy:directed="1"/>
      <edge id="1152" label="Q6IRU5 (pp) P62743" source="353" target="233" cy:directed="1"/>
      <edge id="1151" label="Q6IRU5 (pp) P17426" source="353" target="599" cy:directed="1"/>
      <edge id="1150" label="Q6IRU5 (pp) Q61548" source="353" target="472" cy:directed="1"/>
      <edge id="1149" label="P17183 (pp) P40142" source="352" target="531" cy:directed="1"/>
      <edge id="1148" label="P17183 (pp) P05064" source="352" target="569" cy:directed="1"/>
      <edge id="1147" label="P17183 (pp) Q9DBJ1" source="352" target="309" cy:directed="1"/>
      <edge id="1146" label="P17183 (pp) P05063" source="352" target="378" cy:directed="1"/>
      <edge id="1145" label="P17183 (pp) P17751" source="352" target="593" cy:directed="1"/>
      <edge id="1144" label="P17183 (pp) Q8BH04" source="352" target="266" cy:directed="1"/>
      <edge id="1143" label="P17183 (pp) P09411" source="352" target="592" cy:directed="1"/>
      <edge id="1142" label="P17183 (pp) P52480" source="352" target="435" cy:directed="1"/>
      <edge id="1141" label="P17183 (pp) Q93092" source="352" target="436" cy:directed="1"/>
      <edge id="1140" label="P17183 (pp) P56480" source="352" target="632" cy:directed="1"/>
      <edge id="1139" label="P17183 (pp) P06745" source="352" target="426" cy:directed="1"/>
      <edge id="1138" label="Q9QXS6 (pp) P62259" source="351" target="665" cy:directed="1"/>
      <edge id="1137" label="Q8BHL5 (pp) Q60631" source="350" target="537" cy:directed="1"/>
      <edge id="1136" label="O88712 (pp) Q62420" source="349" target="419" cy:directed="1"/>
      <edge id="1135" label="Q9DCB8 (pp) Q9Z1J3" source="348" target="347" cy:directed="1"/>
      <edge id="1134" label="Q9DCB8 (pp) Q99KI0" source="348" target="552" cy:directed="1"/>
      <edge id="1133" label="Q9DCB8 (pp) Q9D6J6" source="348" target="683" cy:directed="1"/>
      <edge id="1132" label="Q8BMF3 (pp) P06151" source="346" target="652" cy:directed="1"/>
      <edge id="1131" label="Q8BMF3 (pp) P52480" source="346" target="435" cy:directed="1"/>
      <edge id="1130" label="Q8BMF3 (pp) Q05920" source="346" target="636" cy:directed="1"/>
      <edge id="1129" label="Q62425 (pp) Q9DCS9" source="345" target="624" cy:directed="1"/>
      <edge id="1128" label="Q62425 (pp) Q9CQ54" source="345" target="658" cy:directed="1"/>
      <edge id="1127" label="Q62425 (pp) Q9DCJ5" source="345" target="510" cy:directed="1"/>
      <edge id="1126" label="Q62425 (pp) Q9Z1P6" source="345" target="591" cy:directed="1"/>
      <edge id="1125" label="Q62425 (pp) O09111" source="345" target="679" cy:directed="1"/>
      <edge id="1124" label="Q62425 (pp) P16054" source="345" target="447" cy:directed="1"/>
      <edge id="1123" label="Q62425 (pp) Q3UIU2" source="345" target="602" cy:directed="1"/>
      <edge id="1122" label="Q62425 (pp) P68510" source="345" target="677" cy:directed="1"/>
      <edge id="1121" label="Q62425 (pp) Q9CQ69" source="345" target="656" cy:directed="1"/>
      <edge id="1120" label="Q62425 (pp) Q99LX0" source="345" target="573" cy:directed="1"/>
      <edge id="1119" label="Q62425 (pp) Q9CQH3" source="345" target="650" cy:directed="1"/>
      <edge id="1118" label="P38647 (pp) P63101" source="344" target="411" cy:directed="1"/>
      <edge id="1117" label="P38647 (pp) Q9QYJ0" source="344" target="515" cy:directed="1"/>
      <edge id="1116" label="P38647 (pp) P63038" source="344" target="643" cy:directed="1"/>
      <edge id="1115" label="P38647 (pp) Q8JZQ2" source="344" target="497" cy:directed="1"/>
      <edge id="1114" label="P38647 (pp) Q60864" source="344" target="516" cy:directed="1"/>
      <edge id="1113" label="P63011 (pp) Q99NE5" source="343" target="154" cy:directed="1"/>
      <edge id="1112" label="P63011 (pp) P35438" source="343" target="675" cy:directed="1"/>
      <edge id="1111" label="P63011 (pp) P47708" source="343" target="236" cy:directed="1"/>
      <edge id="1110" label="Q60598 (pp) P61161" source="342" target="341" cy:directed="1"/>
      <edge id="1109" label="Q60598 (pp) P05480" source="342" target="546" cy:directed="1"/>
      <edge id="1108" label="Q60598 (pp) Q80Z38" source="342" target="685" cy:directed="1"/>
      <edge id="1107" label="Q60598 (pp) Q9CVB6" source="342" target="397" cy:directed="1"/>
      <edge id="1106" label="Q60598 (pp) P35438" source="342" target="675" cy:directed="1"/>
      <edge id="1105" label="Q60598 (pp) Q01097" source="342" target="686" cy:directed="1"/>
      <edge id="1104" label="Q60598 (pp) P63085" source="342" target="635" cy:directed="1"/>
      <edge id="1103" label="Q60598 (pp) P59999" source="342" target="398" cy:directed="1"/>
      <edge id="1102" label="Q60598 (pp) P23819" source="342" target="671" cy:directed="1"/>
      <edge id="1101" label="Q60598 (pp) Q5FWK3" source="342" target="400" cy:directed="1"/>
      <edge id="1100" label="Q60598 (pp) Q9JM76" source="342" target="512" cy:directed="1"/>
      <edge id="1099" label="Q9Z0X1 (pp) Q8K1M6" source="340" target="440" cy:directed="1"/>
      <edge id="1098" label="Q9Z0X1 (pp) P17742" source="340" target="631" cy:directed="1"/>
      <edge id="1097" label="Q8VDP6 (pp) Q99L43" source="339" target="338" cy:directed="1"/>
      <edge id="1096" label="Q8VDP6 (pp) Q9Z1B3" source="339" target="581" cy:directed="1"/>
      <edge id="1095" label="Q8VDP6 (pp) P63082" source="339" target="442" cy:directed="1"/>
      <edge id="1094" label="Q8VDP6 (pp) O55023" source="339" target="248" cy:directed="1"/>
      <edge id="1093" label="Q9JLZ3 (pp) Q3ULD5" source="336" target="540" cy:directed="1"/>
      <edge id="1092" label="Q9JLZ3 (pp) Q61425" source="336" target="576" cy:directed="1"/>
      <edge id="1091" label="Q9JLZ3 (pp) Q9JLJ2" source="336" target="628" cy:directed="1"/>
      <edge id="1090" label="Q9JLZ3 (pp) Q8BH95" source="336" target="642" cy:directed="1"/>
      <edge id="1089" label="Q9JLZ3 (pp) Q99MR8" source="336" target="265" cy:directed="1"/>
      <edge id="1088" label="Q60931 (pp) Q9D6J6" source="334" target="683" cy:directed="1"/>
      <edge id="1087" label="Q60931 (pp) Q9CQH3" source="334" target="650" cy:directed="1"/>
      <edge id="1086" label="Q8QZT1 (pp) Q8BMS1" source="333" target="374" cy:directed="1"/>
      <edge id="1085" label="Q8QZT1 (pp) Q9D2G2" source="333" target="603" cy:directed="1"/>
      <edge id="1084" label="Q8QZT1 (pp) Q9WUM5" source="333" target="614" cy:directed="1"/>
      <edge id="1083" label="Q8QZT1 (pp) Q99JY0" source="333" target="506" cy:directed="1"/>
      <edge id="1082" label="Q8QZT1 (pp) O08756" source="333" target="507" cy:directed="1"/>
      <edge id="1081" label="Q8QZT1 (pp) Q9D0K2" source="333" target="613" cy:directed="1"/>
      <edge id="1080" label="Q8QZT1 (pp) Q9DBL1" source="333" target="439" cy:directed="1"/>
      <edge id="1079" label="Q8QZT1 (pp) Q8BWT1" source="333" target="579" cy:directed="1"/>
      <edge id="1078" label="Q8QZT1 (pp) Q8BMF4" source="333" target="637" cy:directed="1"/>
      <edge id="1077" label="Q8QZT1 (pp) Q99LC5" source="333" target="575" cy:directed="1"/>
      <edge id="1076" label="Q8VD37 (pp) Q62420" source="332" target="419" cy:directed="1"/>
      <edge id="1075" label="Q8VD37 (pp) P35564" source="332" target="203" cy:directed="1"/>
      <edge id="1074" label="Q8VD37 (pp) P17426" source="332" target="599" cy:directed="1"/>
      <edge id="1073" label="P62746 (pp) Q8BG51" source="330" target="493" cy:directed="1"/>
      <edge id="1072" label="P62746 (pp) Q5FWK3" source="330" target="400" cy:directed="1"/>
      <edge id="1071" label="P62746 (pp) P63330" source="330" target="661" cy:directed="1"/>
      <edge id="1070" label="P11627 (pp) P13595" source="329" target="328" cy:directed="1"/>
      <edge id="1069" label="P13595 (pp) Q9CQV8" source="328" target="533" cy:directed="1"/>
      <edge id="1068" label="P13595 (pp) P04925" source="328" target="505" cy:directed="1"/>
      <edge id="1067" label="P13595 (pp) P16546" source="328" target="662" cy:directed="1"/>
      <edge id="1066" label="Q8BKX1 (pp) P62259" source="327" target="665" cy:directed="1"/>
      <edge id="1065" label="Q8BKX1 (pp) P28660" source="327" target="508" cy:directed="1"/>
      <edge id="1064" label="O70589 (pp) P16330" source="326" target="325" cy:directed="1"/>
      <edge id="1063" label="O70589 (pp) P60469" source="326" target="277" cy:directed="1"/>
      <edge id="1062" label="O70589 (pp) O08599" source="326" target="216" cy:directed="1"/>
      <edge id="1061" label="O70589 (pp) O88935" source="326" target="459" cy:directed="1"/>
      <edge id="1060" label="P03995 (pp) Q9QXS1" source="324" target="215" cy:directed="1"/>
      <edge id="1059" label="P03995 (pp) P63101" source="324" target="411" cy:directed="1"/>
      <edge id="1058" label="P99024 (pp) O70589" source="323" target="326" cy:directed="1"/>
      <edge id="1057" label="P99024 (pp) Q6PER3" source="323" target="583" cy:directed="1"/>
      <edge id="1056" label="P99024 (pp) P60879" source="323" target="509" cy:directed="1"/>
      <edge id="1055" label="P84091 (pp) P17426" source="321" target="599" cy:directed="1"/>
      <edge id="1054" label="P84091 (pp) P50516" source="321" target="597" cy:directed="1"/>
      <edge id="1053" label="P84091 (pp) Q68FD5" source="321" target="514" cy:directed="1"/>
      <edge id="1052" label="P84091 (pp) O08585" source="321" target="283" cy:directed="1"/>
      <edge id="1051" label="P84091 (pp) Q80VP1" source="321" target="258" cy:directed="1"/>
      <edge id="1050" label="P84091 (pp) P62743" source="321" target="233" cy:directed="1"/>
      <edge id="1049" label="P84091 (pp) Q6IRU5" source="321" target="353" cy:directed="1"/>
      <edge id="1048" label="P84091 (pp) Q9DBG3" source="321" target="354" cy:directed="1"/>
      <edge id="1047" label="Q9QXJ1 (pp) P04925" source="320" target="505" cy:directed="1"/>
      <edge id="1046" label="Q9QXJ1 (pp) P12023" source="320" target="565" cy:directed="1"/>
      <edge id="1045" label="Q9R0Y5 (pp) Q9DCD0" source="318" target="668" cy:directed="1"/>
      <edge id="1044" label="P47802 (pp) O88441" source="317" target="595" cy:directed="1"/>
      <edge id="1043" label="Q6PIE5 (pp) P70414" source="316" target="315" cy:directed="1"/>
      <edge id="1042" label="P28652 (pp) P23819" source="314" target="671" cy:directed="1"/>
      <edge id="1041" label="P28652 (pp) P35436" source="314" target="670" cy:directed="1"/>
      <edge id="1040" label="P28652 (pp) Q6PHZ2" source="314" target="549" cy:directed="1"/>
      <edge id="1039" label="P28652 (pp) Q01097" source="314" target="686" cy:directed="1"/>
      <edge id="1038" label="Q99K85 (pp) Q91Z53" source="313" target="555" cy:directed="1"/>
      <edge id="1037" label="Q99K85 (pp) O88712" source="313" target="349" cy:directed="1"/>
      <edge id="1036" label="P62204 (pp) P35438" source="311" target="675" cy:directed="1"/>
      <edge id="1035" label="P62204 (pp) P63328" source="311" target="275" cy:directed="1"/>
      <edge id="1034" label="P62204 (pp) O70589" source="311" target="326" cy:directed="1"/>
      <edge id="1033" label="P62204 (pp) P63101" source="311" target="411" cy:directed="1"/>
      <edge id="1032" label="P68254 (pp) P10637" source="310" target="356" cy:directed="1"/>
      <edge id="1031" label="Q9DBJ1 (pp) Q93092" source="309" target="436" cy:directed="1"/>
      <edge id="1030" label="Q9DBJ1 (pp) P09411" source="309" target="592" cy:directed="1"/>
      <edge id="1029" label="Q9DBJ1 (pp) P06745" source="309" target="426" cy:directed="1"/>
      <edge id="1028" label="Q9DBJ1 (pp) Q99K85" source="309" target="313" cy:directed="1"/>
      <edge id="1027" label="Q9DBJ1 (pp) P17751" source="309" target="593" cy:directed="1"/>
      <edge id="1026" label="Q9DBJ1 (pp) P17182" source="309" target="375" cy:directed="1"/>
      <edge id="1025" label="Q9DBJ1 (pp) P52480" source="309" target="435" cy:directed="1"/>
      <edge id="1024" label="P23818 (pp) P35436" source="308" target="670" cy:directed="1"/>
      <edge id="1023" label="P23818 (pp) P35438" source="308" target="675" cy:directed="1"/>
      <edge id="1022" label="P23818 (pp) Q3UVX5" source="308" target="269" cy:directed="1"/>
      <edge id="1021" label="P23818 (pp) P23819" source="308" target="671" cy:directed="1"/>
      <edge id="1020" label="Q68FF6 (pp) P63101" source="307" target="411" cy:directed="1"/>
      <edge id="1019" label="Q68FF6 (pp) B9EKR1" source="307" target="281" cy:directed="1"/>
      <edge id="1018" label="Q68FF6 (pp) P62204" source="307" target="311" cy:directed="1"/>
      <edge id="1017" label="P30999 (pp) Q02248" source="306" target="547" cy:directed="1"/>
      <edge id="1016" label="P30999 (pp) P35438" source="306" target="675" cy:directed="1"/>
      <edge id="1015" label="P30999 (pp) Q60598" source="306" target="342" cy:directed="1"/>
      <edge id="1014" label="Q9R0N7 (pp) P60879" source="303" target="509" cy:directed="1"/>
      <edge id="1013" label="Q9R0N7 (pp) Q9Z0P4" source="303" target="108" cy:directed="1"/>
      <edge id="1012" label="Q62261 (pp) P63101" source="302" target="411" cy:directed="1"/>
      <edge id="1011" label="Q62261 (pp) P35438" source="302" target="675" cy:directed="1"/>
      <edge id="1010" label="Q62261 (pp) Q01097" source="302" target="686" cy:directed="1"/>
      <edge id="1009" label="Q62261 (pp) P16546" source="302" target="662" cy:directed="1"/>
      <edge id="1008" label="Q62261 (pp) Q810U4" source="302" target="99" cy:directed="1"/>
      <edge id="1007" label="Q62261 (pp) P13595" source="302" target="328" cy:directed="1"/>
      <edge id="1006" label="Q925I1 (pp) O35658" source="301" target="526" cy:directed="1"/>
      <edge id="1005" label="P48453 (pp) P63101" source="300" target="411" cy:directed="1"/>
      <edge id="1004" label="P48453 (pp) P62204" source="300" target="311" cy:directed="1"/>
      <edge id="1003" label="P48453 (pp) P63328" source="300" target="275" cy:directed="1"/>
      <edge id="1002" label="Q4ACU6 (pp) Q8BYM5" source="299" target="298" cy:directed="1"/>
      <edge id="1001" label="Q4ACU6 (pp) Q60631" source="299" target="537" cy:directed="1"/>
      <edge id="1000" label="Q9JIS5 (pp) Q68FF6" source="297" target="307" cy:directed="1"/>
      <edge id="999" label="Q9CS84 (pp) Q8BYM5" source="295" target="298" cy:directed="1"/>
      <edge id="998" label="Q9CS84 (pp) O88952" source="295" target="646" cy:directed="1"/>
      <edge id="997" label="Q9CS84 (pp) O70589" source="295" target="326" cy:directed="1"/>
      <edge id="996" label="O08539 (pp) P10637" source="294" target="356" cy:directed="1"/>
      <edge id="995" label="O08539 (pp) Q8R3V5" source="294" target="227" cy:directed="1"/>
      <edge id="994" label="O08539 (pp) Q8BZ98" source="294" target="206" cy:directed="1"/>
      <edge id="993" label="O70318 (pp) P63001" source="293" target="492" cy:directed="1"/>
      <edge id="992" label="O70318 (pp) O70589" source="293" target="326" cy:directed="1"/>
      <edge id="991" label="Q64332 (pp) P60761" source="292" target="291" cy:directed="1"/>
      <edge id="990" label="Q64332 (pp) P62259" source="292" target="665" cy:directed="1"/>
      <edge id="989" label="Q64332 (pp) Q9JJV2" source="292" target="482" cy:directed="1"/>
      <edge id="988" label="Q64332 (pp) P46460" source="292" target="607" cy:directed="1"/>
      <edge id="987" label="P60761 (pp) P06837" source="291" target="383" cy:directed="1"/>
      <edge id="986" label="P00493 (pp) Q99LC5" source="290" target="575" cy:directed="1"/>
      <edge id="985" label="P00493 (pp) Q9R111" source="290" target="256" cy:directed="1"/>
      <edge id="984" label="P00493 (pp) P52480" source="290" target="435" cy:directed="1"/>
      <edge id="983" label="P00493 (pp) P17742" source="290" target="631" cy:directed="1"/>
      <edge id="982" label="P00493 (pp) P06151" source="290" target="652" cy:directed="1"/>
      <edge id="981" label="P00493 (pp) Q9R0Y5" source="290" target="318" cy:directed="1"/>
      <edge id="980" label="P00493 (pp) P04925" source="290" target="505" cy:directed="1"/>
      <edge id="979" label="Q9Z0R4 (pp) P39053" source="289" target="393" cy:directed="1"/>
      <edge id="978" label="Q9Z0R4 (pp) P50516" source="289" target="597" cy:directed="1"/>
      <edge id="977" label="Q80Y14 (pp) P99029" source="288" target="534" cy:directed="1"/>
      <edge id="976" label="Q80Y14 (pp) Q9DCB8" source="288" target="348" cy:directed="1"/>
      <edge id="975" label="Q80Y14 (pp) Q99KB8" source="288" target="105" cy:directed="1"/>
      <edge id="974" label="Q80Y14 (pp) Q99KI0" source="288" target="552" cy:directed="1"/>
      <edge id="973" label="Q5SQX6 (pp) P28660" source="287" target="508" cy:directed="1"/>
      <edge id="972" label="Q9CPQ1 (pp) Q9ERS2" source="286" target="551" cy:directed="1"/>
      <edge id="971" label="Q9CPQ1 (pp) Q91VR2" source="286" target="627" cy:directed="1"/>
      <edge id="970" label="Q9CPQ1 (pp) Q06185" source="286" target="619" cy:directed="1"/>
      <edge id="969" label="Q9CPQ1 (pp) P19783" source="286" target="645" cy:directed="1"/>
      <edge id="968" label="Q9CPQ1 (pp) Q03265" source="286" target="678" cy:directed="1"/>
      <edge id="967" label="Q9CPQ1 (pp) Q9D6J6" source="286" target="683" cy:directed="1"/>
      <edge id="966" label="Q9CPQ1 (pp) Q9DCX2" source="286" target="524" cy:directed="1"/>
      <edge id="965" label="Q9CPQ1 (pp) Q9CQ69" source="286" target="656" cy:directed="1"/>
      <edge id="964" label="Q9CPQ1 (pp) Q9CPP6" source="286" target="609" cy:directed="1"/>
      <edge id="963" label="Q9CPQ1 (pp) P48771" source="286" target="587" cy:directed="1"/>
      <edge id="962" label="Q9CPQ1 (pp) P17665" source="286" target="335" cy:directed="1"/>
      <edge id="961" label="Q9CPQ1 (pp) Q9DB77" source="286" target="485" cy:directed="1"/>
      <edge id="960" label="Q9CPQ1 (pp) Q9CQJ8" source="286" target="620" cy:directed="1"/>
      <edge id="959" label="Q9CPQ1 (pp) P97450" source="286" target="460" cy:directed="1"/>
      <edge id="958" label="Q9CPQ1 (pp) Q99LY9" source="286" target="638" cy:directed="1"/>
      <edge id="957" label="Q9CPQ1 (pp) Q9D3D9" source="286" target="680" cy:directed="1"/>
      <edge id="956" label="Q9CPQ1 (pp) Q9CQZ6" source="286" target="659" cy:directed="1"/>
      <edge id="955" label="Q9CPQ1 (pp) Q9CQQ7" source="286" target="481" cy:directed="1"/>
      <edge id="954" label="Q9CPQ1 (pp) Q9CQH3" source="286" target="650" cy:directed="1"/>
      <edge id="953" label="Q9CPQ1 (pp) P56379" source="286" target="475" cy:directed="1"/>
      <edge id="952" label="Q9CPQ1 (pp) P43024" source="286" target="418" cy:directed="1"/>
      <edge id="951" label="Q9CPQ1 (pp) Q9CQZ5" source="286" target="684" cy:directed="1"/>
      <edge id="950" label="Q9CPQ1 (pp) Q9DB20" source="286" target="651" cy:directed="1"/>
      <edge id="949" label="Q9CPQ1 (pp) Q9D855" source="286" target="487" cy:directed="1"/>
      <edge id="948" label="Q9CPQ1 (pp) P00405" source="286" target="221" cy:directed="1"/>
      <edge id="947" label="Q9CPQ1 (pp) P56391" source="286" target="559" cy:directed="1"/>
      <edge id="946" label="Q3UHL1 (pp) P63101" source="285" target="411" cy:directed="1"/>
      <edge id="945" label="Q3UHL1 (pp) P60761" source="285" target="291" cy:directed="1"/>
      <edge id="944" label="Q60932 (pp) Q99LX0" source="284" target="573" cy:directed="1"/>
      <edge id="943" label="Q60932 (pp) P17710" source="284" target="568" cy:directed="1"/>
      <edge id="942" label="Q60932 (pp) P16054" source="284" target="447" cy:directed="1"/>
      <edge id="941" label="Q60932 (pp) Q01097" source="284" target="686" cy:directed="1"/>
      <edge id="940" label="Q60932 (pp) P48962" source="284" target="192" cy:directed="1"/>
      <edge id="939" label="O08585 (pp) Q91VR2" source="283" target="627" cy:directed="1"/>
      <edge id="938" label="O08585 (pp) Q80VP1" source="283" target="258" cy:directed="1"/>
      <edge id="937" label="Q9QYR6 (pp) Q91VR7" source="282" target="143" cy:directed="1"/>
      <edge id="936" label="B9EKR1 (pp) O54991" source="281" target="280" cy:directed="1"/>
      <edge id="935" label="O54991 (pp) Q99P72" source="280" target="212" cy:directed="1"/>
      <edge id="934" label="P45376 (pp) P16054" source="279" target="447" cy:directed="1"/>
      <edge id="933" label="Q62419 (pp) Q7TQF7" source="278" target="385" cy:directed="1"/>
      <edge id="932" label="Q62419 (pp) P39053" source="278" target="393" cy:directed="1"/>
      <edge id="931" label="Q62419 (pp) Q9D8B3" source="278" target="272" cy:directed="1"/>
      <edge id="930" label="P63328 (pp) P22723" source="275" target="234" cy:directed="1"/>
      <edge id="929" label="P63328 (pp) P35438" source="275" target="675" cy:directed="1"/>
      <edge id="928" label="P63328 (pp) O35465" source="275" target="444" cy:directed="1"/>
      <edge id="927" label="P63328 (pp) Q63810" source="275" target="111" cy:directed="1"/>
      <edge id="926" label="P63328 (pp) P63137" source="275" target="590" cy:directed="1"/>
      <edge id="925" label="O55042 (pp) O35526" source="274" target="561" cy:directed="1"/>
      <edge id="924" label="Q9D8B3 (pp) Q9WU78" source="272" target="244" cy:directed="1"/>
      <edge id="923" label="P20357 (pp) P35438" source="270" target="675" cy:directed="1"/>
      <edge id="922" label="P20357 (pp) Q6PHZ2" source="270" target="549" cy:directed="1"/>
      <edge id="921" label="P20357 (pp) P11798" source="270" target="152" cy:directed="1"/>
      <edge id="920" label="P20357 (pp) Q9ERD7" source="270" target="118" cy:directed="1"/>
      <edge id="919" label="P20357 (pp) O88935" source="270" target="459" cy:directed="1"/>
      <edge id="918" label="P20357 (pp) P12367" source="270" target="473" cy:directed="1"/>
      <edge id="917" label="P20357 (pp) P14873" source="270" target="417" cy:directed="1"/>
      <edge id="916" label="Q3UVX5 (pp) P04925" source="269" target="505" cy:directed="1"/>
      <edge id="915" label="Q3UVX5 (pp) P62204" source="269" target="311" cy:directed="1"/>
      <edge id="914" label="Q3UVX5 (pp) P35438" source="269" target="675" cy:directed="1"/>
      <edge id="913" label="Q91WC3 (pp) P50516" source="268" target="597" cy:directed="1"/>
      <edge id="912" label="Q8BWF0 (pp) Q60597" source="267" target="379" cy:directed="1"/>
      <edge id="911" label="Q8BWF0 (pp) P70404" source="267" target="596" cy:directed="1"/>
      <edge id="910" label="Q8BWF0 (pp) P61922" source="267" target="566" cy:directed="1"/>
      <edge id="909" label="Q8BWF0 (pp) Q05920" source="267" target="636" cy:directed="1"/>
      <edge id="908" label="Q8BH04 (pp) Q05920" source="266" target="636" cy:directed="1"/>
      <edge id="907" label="Q8BH04 (pp) P17182" source="266" target="375" cy:directed="1"/>
      <edge id="906" label="Q99MR8 (pp) Q99MN9" source="265" target="456" cy:directed="1"/>
      <edge id="905" label="Q9D6F9 (pp) P50516" source="263" target="597" cy:directed="1"/>
      <edge id="904" label="P41216 (pp) Q99JY0" source="262" target="506" cy:directed="1"/>
      <edge id="903" label="P28663 (pp) P46460" source="260" target="607" cy:directed="1"/>
      <edge id="902" label="P68181 (pp) P12367" source="259" target="473" cy:directed="1"/>
      <edge id="901" label="P68181 (pp) P35438" source="259" target="675" cy:directed="1"/>
      <edge id="900" label="P68181 (pp) P63101" source="259" target="411" cy:directed="1"/>
      <edge id="899" label="Q80VP1 (pp) Q9Z0R4" source="258" target="289" cy:directed="1"/>
      <edge id="898" label="Q6PIC6 (pp) Q01097" source="257" target="686" cy:directed="1"/>
      <edge id="897" label="Q6PIC6 (pp) P04925" source="257" target="505" cy:directed="1"/>
      <edge id="896" label="Q9D0F9 (pp) P17710" source="255" target="568" cy:directed="1"/>
      <edge id="895" label="Q9D0F9 (pp) Q91ZJ5" source="255" target="276" cy:directed="1"/>
      <edge id="894" label="Q9WUB3 (pp) Q91ZJ5" source="253" target="276" cy:directed="1"/>
      <edge id="893" label="Q9WUB3 (pp) Q9D0F9" source="253" target="255" cy:directed="1"/>
      <edge id="892" label="Q9WUB3 (pp) P47857" source="253" target="359" cy:directed="1"/>
      <edge id="891" label="Q91VZ6 (pp) Q68FD5" source="252" target="514" cy:directed="1"/>
      <edge id="890" label="Q8CHC4 (pp) Q62420" source="251" target="419" cy:directed="1"/>
      <edge id="889" label="Q8CHC4 (pp) P50516" source="251" target="597" cy:directed="1"/>
      <edge id="888" label="Q61411 (pp) P35438" source="250" target="675" cy:directed="1"/>
      <edge id="887" label="Q61411 (pp) P63038" source="250" target="643" cy:directed="1"/>
      <edge id="886" label="Q60875 (pp) Q8BG51" source="249" target="493" cy:directed="1"/>
      <edge id="885" label="Q60875 (pp) P84096" source="249" target="186" cy:directed="1"/>
      <edge id="884" label="Q80UU9 (pp) P68510" source="247" target="677" cy:directed="1"/>
      <edge id="883" label="Q9R0P9 (pp) P68369" source="246" target="542" cy:directed="1"/>
      <edge id="882" label="Q9R0P9 (pp) Q99LX0" source="246" target="573" cy:directed="1"/>
      <edge id="881" label="Q9R0P9 (pp) O55042" source="246" target="274" cy:directed="1"/>
      <edge id="880" label="P0C0A3 (pp) Q9WU78" source="245" target="244" cy:directed="1"/>
      <edge id="879" label="P0C0A3 (pp) Q9D8B3" source="245" target="272" cy:directed="1"/>
      <edge id="878" label="Q9WU78 (pp) Q62420" source="244" target="419" cy:directed="1"/>
      <edge id="877" label="Q9WU78 (pp) P05480" source="244" target="546" cy:directed="1"/>
      <edge id="876" label="Q9WU78 (pp) Q60631" source="244" target="537" cy:directed="1"/>
      <edge id="875" label="Q9WU78 (pp) Q62419" source="244" target="278" cy:directed="1"/>
      <edge id="874" label="P50396 (pp) P62821" source="243" target="242" cy:directed="1"/>
      <edge id="873" label="P50396 (pp) P07901" source="243" target="382" cy:directed="1"/>
      <edge id="872" label="P50396 (pp) Q99PT1" source="243" target="457" cy:directed="1"/>
      <edge id="871" label="P50396 (pp) P63011" source="243" target="343" cy:directed="1"/>
      <edge id="870" label="Q9CQI6 (pp) P60710" source="241" target="548" cy:directed="1"/>
      <edge id="869" label="Q9CRB9 (pp) P16054" source="240" target="447" cy:directed="1"/>
      <edge id="868" label="P35279 (pp) Q61598" source="239" target="633" cy:directed="1"/>
      <edge id="867" label="Q60605 (pp) Q01097" source="235" target="686" cy:directed="1"/>
      <edge id="866" label="P62743 (pp) O08585" source="233" target="283" cy:directed="1"/>
      <edge id="865" label="Q810U3 (pp) Q8C8R3" source="229" target="663" cy:directed="1"/>
      <edge id="864" label="P67871 (pp) Q60737" source="228" target="86" cy:directed="1"/>
      <edge id="863" label="Q8R3V5 (pp) Q8CHC4" source="227" target="251" cy:directed="1"/>
      <edge id="862" label="P58281 (pp) Q8K1M6" source="226" target="440" cy:directed="1"/>
      <edge id="861" label="P63318 (pp) P35438" source="224" target="675" cy:directed="1"/>
      <edge id="860" label="P56564 (pp) P63101" source="222" target="411" cy:directed="1"/>
      <edge id="859" label="P56564 (pp) P28661" source="222" target="184" cy:directed="1"/>
      <edge id="858" label="P00405 (pp) P03930" source="221" target="502" cy:directed="1"/>
      <edge id="857" label="P00405 (pp) Q6PB66" source="221" target="392" cy:directed="1"/>
      <edge id="856" label="Q9EPJ9 (pp) P62331" source="220" target="572" cy:directed="1"/>
      <edge id="855" label="O35239 (pp) P46460" source="218" target="607" cy:directed="1"/>
      <edge id="854" label="Q8BW75 (pp) Q9DBF1" source="217" target="408" cy:directed="1"/>
      <edge id="853" label="Q8BW75 (pp) Q9CZS1" source="217" target="478" cy:directed="1"/>
      <edge id="852" label="O08599 (pp) P61264" source="216" target="423" cy:directed="1"/>
      <edge id="851" label="O08599 (pp) P16546" source="216" target="662" cy:directed="1"/>
      <edge id="850" label="Q9QXS1 (pp) Q64010" source="215" target="461" cy:directed="1"/>
      <edge id="849" label="Q9QXS1 (pp) P63101" source="215" target="411" cy:directed="1"/>
      <edge id="848" label="P20444 (pp) P26645" source="214" target="185" cy:directed="1"/>
      <edge id="847" label="Q60930 (pp) Q9CR68" source="213" target="623" cy:directed="1"/>
      <edge id="846" label="Q60930 (pp) Q01097" source="213" target="686" cy:directed="1"/>
      <edge id="845" label="Q60930 (pp) Q9WUM5" source="213" target="614" cy:directed="1"/>
      <edge id="844" label="Q60930 (pp) P48962" source="213" target="192" cy:directed="1"/>
      <edge id="843" label="Q99P72 (pp) P48722" source="212" target="188" cy:directed="1"/>
      <edge id="842" label="Q99P72 (pp) Q9D1T0" source="212" target="150" cy:directed="1"/>
      <edge id="841" label="O35643 (pp) Q60631" source="211" target="537" cy:directed="1"/>
      <edge id="840" label="O35643 (pp) Q80TZ3" source="211" target="165" cy:directed="1"/>
      <edge id="839" label="O35643 (pp) O08585" source="211" target="283" cy:directed="1"/>
      <edge id="838" label="Q8R191 (pp) P50516" source="210" target="597" cy:directed="1"/>
      <edge id="837" label="Q8R191 (pp) Q62277" source="210" target="536" cy:directed="1"/>
      <edge id="836" label="P61164 (pp) P62259" source="209" target="665" cy:directed="1"/>
      <edge id="835" label="Q5RJI5 (pp) P62259" source="207" target="665" cy:directed="1"/>
      <edge id="834" label="Q8BZ98 (pp) Q61644" source="206" target="205" cy:directed="1"/>
      <edge id="833" label="Q8BZ98 (pp) Q60598" source="206" target="342" cy:directed="1"/>
      <edge id="832" label="Q8BZ98 (pp) Q60631" source="206" target="537" cy:directed="1"/>
      <edge id="831" label="Q61644 (pp) P10637" source="205" target="356" cy:directed="1"/>
      <edge id="830" label="Q61644 (pp) Q8CHC4" source="205" target="251" cy:directed="1"/>
      <edge id="829" label="Q61644 (pp) P39053" source="205" target="393" cy:directed="1"/>
      <edge id="828" label="P19096 (pp) Q05920" source="204" target="636" cy:directed="1"/>
      <edge id="827" label="P19096 (pp) Q64521" source="204" target="465" cy:directed="1"/>
      <edge id="826" label="P19096 (pp) Q9DCD0" source="204" target="668" cy:directed="1"/>
      <edge id="825" label="P35564 (pp) P09103" source="203" target="416" cy:directed="1"/>
      <edge id="824" label="Q9CZ42 (pp) P61922" source="202" target="566" cy:directed="1"/>
      <edge id="823" label="Q61490 (pp) P01831" source="201" target="271" cy:directed="1"/>
      <edge id="822" label="O35857 (pp) Q9D880" source="196" target="195" cy:directed="1"/>
      <edge id="821" label="O35857 (pp) P38647" source="196" target="344" cy:directed="1"/>
      <edge id="820" label="O35857 (pp) O35129" source="196" target="479" cy:directed="1"/>
      <edge id="819" label="O35857 (pp) P62073" source="196" target="535" cy:directed="1"/>
      <edge id="818" label="O35857 (pp) P17156" source="196" target="312" cy:directed="1"/>
      <edge id="817" label="P43406 (pp) Q71LX4" source="194" target="193" cy:directed="1"/>
      <edge id="816" label="P48962 (pp) Q60931" source="192" target="334" cy:directed="1"/>
      <edge id="815" label="Q8CI94 (pp) P50516" source="191" target="597" cy:directed="1"/>
      <edge id="814" label="Q8CI94 (pp) Q91ZJ5" source="191" target="276" cy:directed="1"/>
      <edge id="813" label="Q8CI94 (pp) Q9D0F9" source="191" target="255" cy:directed="1"/>
      <edge id="812" label="Q8K021 (pp) Q62277" source="190" target="536" cy:directed="1"/>
      <edge id="811" label="P63321 (pp) P35438" source="189" target="675" cy:directed="1"/>
      <edge id="810" label="O35143 (pp) Q9D3D9" source="187" target="680" cy:directed="1"/>
      <edge id="809" label="O35143 (pp) Q91VR2" source="187" target="627" cy:directed="1"/>
      <edge id="808" label="P84096 (pp) Q5FWK3" source="186" target="400" cy:directed="1"/>
      <edge id="807" label="P26645 (pp) P63318" source="185" target="224" cy:directed="1"/>
      <edge id="806" label="P28661 (pp) P42208" source="184" target="183" cy:directed="1"/>
      <edge id="805" label="Q9WV34 (pp) Q01097" source="182" target="686" cy:directed="1"/>
      <edge id="804" label="Q9Z2Q6 (pp) P42208" source="181" target="183" cy:directed="1"/>
      <edge id="803" label="Q9Z2Q6 (pp) O55131" source="181" target="168" cy:directed="1"/>
      <edge id="802" label="P18760 (pp) P40124" source="179" target="178" cy:directed="1"/>
      <edge id="801" label="O54983 (pp) Q8VDQ8" source="177" target="176" cy:directed="1"/>
      <edge id="800" label="Q8VDQ8 (pp) Q9DC69" source="176" target="483" cy:directed="1"/>
      <edge id="799" label="P08551 (pp) P63101" source="175" target="411" cy:directed="1"/>
      <edge id="798" label="P08551 (pp) P19246" source="175" target="232" cy:directed="1"/>
      <edge id="797" label="Q8K4Z3 (pp) Q9Z1P6" source="174" target="591" cy:directed="1"/>
      <edge id="796" label="Q8K4Z3 (pp) Q9CZ42" source="174" target="202" cy:directed="1"/>
      <edge id="795" label="P08553 (pp) P19246" source="173" target="232" cy:directed="1"/>
      <edge id="794" label="P08553 (pp) P46660" source="173" target="489" cy:directed="1"/>
      <edge id="793" label="Q61699 (pp) P68369" source="172" target="542" cy:directed="1"/>
      <edge id="792" label="P12960 (pp) B9EKR1" source="171" target="281" cy:directed="1"/>
      <edge id="791" label="P12960 (pp) P11627" source="171" target="329" cy:directed="1"/>
      <edge id="790" label="P12960 (pp) P04925" source="171" target="505" cy:directed="1"/>
      <edge id="789" label="O35136 (pp) P11627" source="169" target="329" cy:directed="1"/>
      <edge id="788" label="O55131 (pp) P42208" source="168" target="183" cy:directed="1"/>
      <edge id="787" label="Q9WV55 (pp) P63044" source="167" target="490" cy:directed="1"/>
      <edge id="786" label="Q9WV55 (pp) P60879" source="167" target="509" cy:directed="1"/>
      <edge id="785" label="Q9WV55 (pp) Q9QY76" source="167" target="157" cy:directed="1"/>
      <edge id="784" label="Q9WV55 (pp) Q62442" source="167" target="557" cy:directed="1"/>
      <edge id="783" label="Q7TMB8 (pp) P28660" source="166" target="508" cy:directed="1"/>
      <edge id="782" label="Q7TMB8 (pp) Q9JJV2" source="166" target="482" cy:directed="1"/>
      <edge id="781" label="Q80TZ3 (pp) O08585" source="165" target="283" cy:directed="1"/>
      <edge id="780" label="Q80TZ3 (pp) P50516" source="165" target="597" cy:directed="1"/>
      <edge id="779" label="O88643 (pp) P63001" source="164" target="492" cy:directed="1"/>
      <edge id="778" label="O88643 (pp) Q61735" source="164" target="523" cy:directed="1"/>
      <edge id="777" label="O88643 (pp) Q68FF6" source="164" target="307" cy:directed="1"/>
      <edge id="776" label="O88643 (pp) P60766" source="164" target="363" cy:directed="1"/>
      <edge id="775" label="P55302 (pp) Q91ZX7" source="162" target="367" cy:directed="1"/>
      <edge id="774" label="Q91XV3 (pp) P68510" source="161" target="677" cy:directed="1"/>
      <edge id="773" label="Q91XV3 (pp) P26645" source="161" target="185" cy:directed="1"/>
      <edge id="772" label="Q91XV3 (pp) P60761" source="161" target="291" cy:directed="1"/>
      <edge id="771" label="Q91XV3 (pp) P06837" source="161" target="383" cy:directed="1"/>
      <edge id="770" label="P48758 (pp) P62259" source="160" target="665" cy:directed="1"/>
      <edge id="769" label="Q9R1V6 (pp) Q01097" source="159" target="686" cy:directed="1"/>
      <edge id="768" label="Q9R1V6 (pp) Q9JIA1" source="159" target="95" cy:directed="1"/>
      <edge id="767" label="Q9QY76 (pp) P61264" source="157" target="423" cy:directed="1"/>
      <edge id="766" label="Q9QY76 (pp) O08788" source="157" target="553" cy:directed="1"/>
      <edge id="765" label="Q9QY76 (pp) O35526" source="157" target="561" cy:directed="1"/>
      <edge id="764" label="P57780 (pp) P50516" source="156" target="597" cy:directed="1"/>
      <edge id="763" label="P57780 (pp) P09103" source="156" target="416" cy:directed="1"/>
      <edge id="762" label="Q99NE5 (pp) Q9EQZ6" source="154" target="83" cy:directed="1"/>
      <edge id="761" label="Q8K183 (pp) P63330" source="153" target="661" cy:directed="1"/>
      <edge id="760" label="P11798 (pp) Q9WU78" source="152" target="244" cy:directed="1"/>
      <edge id="759" label="P11798 (pp) O88935" source="152" target="459" cy:directed="1"/>
      <edge id="758" label="P11798 (pp) P28652" source="152" target="314" cy:directed="1"/>
      <edge id="757" label="P11798 (pp) P35436" source="152" target="670" cy:directed="1"/>
      <edge id="756" label="P11798 (pp) Q01097" source="152" target="686" cy:directed="1"/>
      <edge id="755" label="P11798 (pp) P63101" source="152" target="411" cy:directed="1"/>
      <edge id="754" label="P11798 (pp) P35438" source="152" target="675" cy:directed="1"/>
      <edge id="753" label="Q9D1T0 (pp) P12023" source="150" target="565" cy:directed="1"/>
      <edge id="752" label="Q61316 (pp) Q60864" source="149" target="516" cy:directed="1"/>
      <edge id="751" label="O08917 (pp) Q60634" source="148" target="147" cy:directed="1"/>
      <edge id="750" label="P97300 (pp) Q99P72" source="146" target="212" cy:directed="1"/>
      <edge id="749" label="Q8CHH9 (pp) P50516" source="145" target="597" cy:directed="1"/>
      <edge id="748" label="Q9CR62 (pp) Q9CZ13" source="144" target="641" cy:directed="1"/>
      <edge id="747" label="Q9CR62 (pp) Q9DC69" source="144" target="483" cy:directed="1"/>
      <edge id="746" label="Q91VR7 (pp) P14873" source="143" target="417" cy:directed="1"/>
      <edge id="745" label="Q7TMM9 (pp) P63101" source="141" target="411" cy:directed="1"/>
      <edge id="744" label="Q7TMM9 (pp) P60879" source="141" target="509" cy:directed="1"/>
      <edge id="743" label="Q2PFD7 (pp) P63101" source="140" target="411" cy:directed="1"/>
      <edge id="742" label="Q920P5 (pp) P63101" source="139" target="411" cy:directed="1"/>
      <edge id="741" label="Q3THE2 (pp) P68510" source="138" target="677" cy:directed="1"/>
      <edge id="740" label="Q3THE2 (pp) Q01097" source="138" target="686" cy:directed="1"/>
      <edge id="739" label="Q91VT4 (pp) Q99LC5" source="136" target="575" cy:directed="1"/>
      <edge id="738" label="Q91VT4 (pp) Q9CR68" source="136" target="623" cy:directed="1"/>
      <edge id="737" label="Q91VT4 (pp) Q8QZT1" source="136" target="333" cy:directed="1"/>
      <edge id="736" label="Q8R5C5 (pp) P50516" source="134" target="597" cy:directed="1"/>
      <edge id="735" label="Q03157 (pp) P04925" source="133" target="505" cy:directed="1"/>
      <edge id="734" label="Q03157 (pp) Q9QXJ1" source="133" target="320" cy:directed="1"/>
      <edge id="733" label="Q03157 (pp) Q9Z268" source="133" target="373" cy:directed="1"/>
      <edge id="732" label="Q03157 (pp) P12023" source="133" target="565" cy:directed="1"/>
      <edge id="731" label="Q61206 (pp) P63005" source="130" target="584" cy:directed="1"/>
      <edge id="730" label="Q8R366 (pp) P04925" source="128" target="505" cy:directed="1"/>
      <edge id="729" label="Q921M7 (pp) P68510" source="126" target="677" cy:directed="1"/>
      <edge id="728" label="Q8BRT1 (pp) P28740" source="124" target="198" cy:directed="1"/>
      <edge id="727" label="P20152 (pp) P16054" source="123" target="447" cy:directed="1"/>
      <edge id="726" label="Q9CZW5 (pp) Q6PB66" source="122" target="392" cy:directed="1"/>
      <edge id="725" label="Q9CZW5 (pp) P63038" source="122" target="643" cy:directed="1"/>
      <edge id="724" label="Q6P9K9 (pp) O70589" source="121" target="326" cy:directed="1"/>
      <edge id="723" label="Q6P9K9 (pp) Q8BYM5" source="121" target="298" cy:directed="1"/>
      <edge id="722" label="Q9CQW1 (pp) P46460" source="120" target="607" cy:directed="1"/>
      <edge id="721" label="Q921J2 (pp) P63101" source="119" target="411" cy:directed="1"/>
      <edge id="720" label="Q9ERD7 (pp) P47757" source="118" target="664" cy:directed="1"/>
      <edge id="719" label="Q8K0T0 (pp) Q01097" source="114" target="686" cy:directed="1"/>
      <edge id="718" label="Q8K0T0 (pp) P50516" source="114" target="597" cy:directed="1"/>
      <edge id="717" label="Q61330 (pp) B9EKR1" source="112" target="281" cy:directed="1"/>
      <edge id="716" label="Q63810 (pp) P48453" source="111" target="300" cy:directed="1"/>
      <edge id="715" label="Q9Z2W9 (pp) P23819" source="110" target="671" cy:directed="1"/>
      <edge id="714" label="Q04447 (pp) P63017" source="109" target="470" cy:directed="1"/>
      <edge id="713" label="Q9CYT6 (pp) P40124" source="106" target="178" cy:directed="1"/>
      <edge id="712" label="Q9D6K5 (pp) Q8CHC4" source="104" target="251" cy:directed="1"/>
      <edge id="711" label="Q9R1V7 (pp) P04925" source="102" target="505" cy:directed="1"/>
      <edge id="710" label="Q9R1V7 (pp) Q9JIA1" source="102" target="95" cy:directed="1"/>
      <edge id="709" label="Q9ES97 (pp) Q8K0T0" source="101" target="114" cy:directed="1"/>
      <edge id="708" label="Q9ES97 (pp) Q99P72" source="101" target="212" cy:directed="1"/>
      <edge id="707" label="D3YVF0 (pp) P35438" source="100" target="675" cy:directed="1"/>
      <edge id="706" label="D3YVF0 (pp) P48453" source="100" target="300" cy:directed="1"/>
      <edge id="705" label="P53994 (pp) Q61598" source="97" target="633" cy:directed="1"/>
      <edge id="704" label="Q9JIA1 (pp) Q01097" source="95" target="686" cy:directed="1"/>
      <edge id="703" label="Q91WS0 (pp) Q9CQH3" source="94" target="650" cy:directed="1"/>
      <edge id="702" label="Q9QZF2 (pp) P12023" source="91" target="565" cy:directed="1"/>
      <edge id="701" label="Q4KMM3 (pp) P50516" source="88" target="597" cy:directed="1"/>
      <edge id="700" label="Q9CR95 (pp) P17427" source="87" target="600" cy:directed="1"/>
      <edge id="699" label="P80560 (pp) P18052" source="85" target="476" cy:directed="1"/>
      <edge id="698" label="P23927 (pp) P16054" source="82" target="447" cy:directed="1"/>
      <edge id="697" label="Q9QYX7 (pp) Q9EQZ6" source="81" target="83" cy:directed="1"/>
      <edge id="696" label="Q03137 (pp) P39688" source="80" target="504" cy:directed="1"/>
      <edge id="695" label="P58771 (pp) P16054" source="79" target="447" cy:directed="1"/>
      <edge id="694" label="Q8VHW2 (pp) P23819" source="78" target="671" cy:directed="1"/>
      <edge id="693" label="O54774 (pp) Q68FD5" source="77" target="514" cy:directed="1"/>
      <edge id="692" label="Q9DB73 (pp) Q91VR2" source="76" target="627" cy:directed="1"/>
      <edge id="691" label="O88342 (pp) Q9CVB6" source="75" target="397" cy:directed="1"/>
      <edge id="690" label="O88342 (pp) P47757" source="75" target="664" cy:directed="1"/>
      <edge id="689" label="O88342 (pp) P18760" source="75" target="179" cy:directed="1"/>
      <edge id="688" label="Q9R1V4 (pp) Q9JIA1" source="73" target="95" cy:directed="1"/>
      <edge id="687" label="Q00493 (pp) P12023" source="72" target="565" cy:directed="1"/>
    </graph>
  </att>
  <att>
    <graph id="4077" label="Cytoskeleton Subnetwork" cy:registered="1">
      <node id="32562" label="P68369"/>
      <node xlink:href="#492"/>
      <node xlink:href="#107"/>
      <node xlink:href="#362"/>
      <node xlink:href="#106"/>
      <node xlink:href="#489"/>
      <node xlink:href="#488"/>
      <node xlink:href="#232"/>
      <node xlink:href="#358"/>
      <node xlink:href="#356"/>
      <node xlink:href="#482"/>
      <node xlink:href="#225"/>
      <node xlink:href="#96"/>
      <node xlink:href="#351"/>
      <node xlink:href="#476"/>
      <node xlink:href="#90"/>
      <node xlink:href="#601"/>
      <node xlink:href="#469"/>
      <node xlink:href="#341"/>
      <node xlink:href="#82"/>
      <node xlink:href="#79"/>
      <node xlink:href="#461"/>
      <node xlink:href="#205"/>
      <node xlink:href="#75"/>
      <node xlink:href="#330"/>
      <node xlink:href="#583"/>
      <node xlink:href="#455"/>
      <node xlink:href="#453"/>
      <node xlink:href="#323"/>
      <node xlink:href="#448"/>
      <node xlink:href="#447"/>
      <node xlink:href="#565"/>
      <node xlink:href="#563"/>
      <node xlink:href="#307"/>
      <node xlink:href="#179"/>
      <node xlink:href="#562"/>
      <node xlink:href="#306"/>
      <node xlink:href="#178"/>
      <node xlink:href="#304"/>
      <node xlink:href="#175"/>
      <node xlink:href="#302"/>
      <node xlink:href="#173"/>
      <node xlink:href="#554"/>
      <node xlink:href="#170"/>
      <node xlink:href="#553"/>
      <node xlink:href="#297"/>
      <node xlink:href="#166"/>
      <node xlink:href="#293"/>
      <node xlink:href="#548"/>
      <node xlink:href="#292"/>
      <node xlink:href="#164"/>
      <node xlink:href="#547"/>
      <node xlink:href="#673"/>
      <node xlink:href="#417"/>
      <node xlink:href="#672"/>
      <node xlink:href="#158"/>
      <node xlink:href="#156"/>
      <node xlink:href="#409"/>
      <node xlink:href="#664"/>
      <node xlink:href="#280"/>
      <node xlink:href="#663"/>
      <node xlink:href="#662"/>
      <node xlink:href="#661"/>
      <node xlink:href="#660"/>
      <node xlink:href="#274"/>
      <node xlink:href="#273"/>
      <node xlink:href="#271"/>
      <node xlink:href="#143"/>
      <node xlink:href="#398"/>
      <node xlink:href="#270"/>
      <node xlink:href="#397"/>
      <node xlink:href="#395"/>
      <node xlink:href="#394"/>
      <node xlink:href="#649"/>
      <node xlink:href="#137"/>
      <node xlink:href="#648"/>
      <node xlink:href="#519"/>
      <node xlink:href="#263"/>
      <node xlink:href="#518"/>
      <node xlink:href="#261"/>
      <node xlink:href="#133"/>
      <node xlink:href="#513"/>
      <node xlink:href="#512"/>
      <node xlink:href="#384"/>
      <node xlink:href="#509"/>
      <node xlink:href="#508"/>
      <node xlink:href="#635"/>
      <node xlink:href="#123"/>
      <node xlink:href="#376"/>
      <node xlink:href="#503"/>
      <node xlink:href="#118"/>
      <node xlink:href="#241"/>
      <node id="4087" label="Q60598"/>
      <edge id="32574" label="P68369 (undirected) P27546" source="32562" target="225" cy:directed="0"/>
      <edge id="32572" label="P68369 (undirected) Q9JHU4" source="32562" target="488" cy:directed="0"/>
      <edge xlink:href="#1176"/>
      <edge xlink:href="#713"/>
      <edge xlink:href="#1840"/>
      <edge xlink:href="#1833"/>
      <edge xlink:href="#1836"/>
      <edge xlink:href="#1838"/>
      <edge xlink:href="#1839"/>
      <edge xlink:href="#1163"/>
      <edge xlink:href="#1165"/>
      <edge xlink:href="#1167"/>
      <edge xlink:href="#1746"/>
      <edge xlink:href="#1747"/>
      <edge xlink:href="#2920"/>
      <edge xlink:href="#2922"/>
      <edge xlink:href="#1670"/>
      <edge xlink:href="#698"/>
      <edge xlink:href="#695"/>
      <edge xlink:href="#831"/>
      <edge xlink:href="#689"/>
      <edge xlink:href="#690"/>
      <edge xlink:href="#691"/>
      <edge xlink:href="#1071"/>
      <edge xlink:href="#2768"/>
      <edge xlink:href="#1589"/>
      <edge xlink:href="#1590"/>
      <edge xlink:href="#1585"/>
      <edge xlink:href="#1587"/>
      <edge xlink:href="#1056"/>
      <edge xlink:href="#1057"/>
      <edge xlink:href="#1566"/>
      <edge xlink:href="#1567"/>
      <edge xlink:href="#1569"/>
      <edge xlink:href="#1570"/>
      <edge xlink:href="#1559"/>
      <edge xlink:href="#1565"/>
      <edge xlink:href="#2517"/>
      <edge xlink:href="#2520"/>
      <edge xlink:href="#2521"/>
      <edge xlink:href="#2522"/>
      <edge xlink:href="#2523"/>
      <edge xlink:href="#2524"/>
      <edge xlink:href="#2527"/>
      <edge xlink:href="#2530"/>
      <edge xlink:href="#2535"/>
      <edge xlink:href="#2537"/>
      <edge xlink:href="#2539"/>
      <edge xlink:href="#2543"/>
      <edge xlink:href="#2548"/>
      <edge xlink:href="#2553"/>
      <edge xlink:href="#2497"/>
      <edge xlink:href="#2498"/>
      <edge xlink:href="#802"/>
      <edge xlink:href="#1017"/>
      <edge id="4094" label="P30999 (undirected) Node 1" source="306" target="4087" cy:directed="0"/>
      <edge xlink:href="#798"/>
      <edge xlink:href="#1009"/>
      <edge xlink:href="#794"/>
      <edge xlink:href="#795"/>
      <edge xlink:href="#2449"/>
      <edge xlink:href="#2450"/>
      <edge xlink:href="#1000"/>
      <edge xlink:href="#782"/>
      <edge xlink:href="#783"/>
      <edge xlink:href="#993"/>
      <edge xlink:href="#2364"/>
      <edge xlink:href="#2365"/>
      <edge xlink:href="#2366"/>
      <edge xlink:href="#2368"/>
      <edge xlink:href="#2369"/>
      <edge xlink:href="#2370"/>
      <edge xlink:href="#989"/>
      <edge xlink:href="#777"/>
      <edge xlink:href="#779"/>
      <edge xlink:href="#2354"/>
      <edge xlink:href="#3784"/>
      <edge xlink:href="#3785"/>
      <edge xlink:href="#3786"/>
      <edge xlink:href="#3788"/>
      <edge xlink:href="#3778"/>
      <edge xlink:href="#3779"/>
      <edge xlink:href="#3780"/>
      <edge xlink:href="#3782"/>
      <edge xlink:href="#3695"/>
      <edge xlink:href="#3694"/>
      <edge xlink:href="#3691"/>
      <edge xlink:href="#3686"/>
      <edge xlink:href="#3688"/>
      <edge xlink:href="#3689"/>
      <edge xlink:href="#3690"/>
      <edge xlink:href="#3675"/>
      <edge xlink:href="#3676"/>
      <edge xlink:href="#3680"/>
      <edge xlink:href="#3681"/>
      <edge xlink:href="#3684"/>
      <edge xlink:href="#3685"/>
      <edge xlink:href="#746"/>
      <edge xlink:href="#917"/>
      <edge xlink:href="#920"/>
      <edge xlink:href="#1301"/>
      <edge xlink:href="#1302"/>
      <edge xlink:href="#1303"/>
      <edge xlink:href="#1304"/>
      <edge xlink:href="#1305"/>
      <edge xlink:href="#1306"/>
      <edge xlink:href="#1308"/>
      <edge xlink:href="#1309"/>
      <edge xlink:href="#1283"/>
      <edge xlink:href="#3432"/>
      <edge xlink:href="#3431"/>
      <edge xlink:href="#2073"/>
      <edge xlink:href="#2074"/>
      <edge xlink:href="#2075"/>
      <edge xlink:href="#732"/>
      <edge xlink:href="#2037"/>
      <edge xlink:href="#2038"/>
      <edge xlink:href="#2039"/>
      <edge xlink:href="#2034"/>
      <edge xlink:href="#2036"/>
      <edge xlink:href="#1245"/>
      <edge xlink:href="#1246"/>
      <edge xlink:href="#1248"/>
      <edge xlink:href="#1976"/>
      <edge xlink:href="#1981"/>
      <edge xlink:href="#1982"/>
      <edge xlink:href="#1992"/>
      <edge xlink:href="#1974"/>
      <edge xlink:href="#3268"/>
      <edge xlink:href="#727"/>
      <edge xlink:href="#1216"/>
      <edge xlink:href="#1217"/>
      <edge xlink:href="#1953"/>
      <edge xlink:href="#720"/>
      <edge xlink:href="#870"/>
      <edge id="4093" label="Node 1 (undirected) P61161" source="4087" target="341" cy:directed="0"/>
      <edge id="4092" label="Node 1 (undirected) P63085" source="4087" target="635" cy:directed="0"/>
      <edge id="4091" label="Node 1 (undirected) Q99JY9" source="4087" target="455" cy:directed="0"/>
      <edge id="4090" label="Node 1 (undirected) Q9CVB6" source="4087" target="397" cy:directed="0"/>
      <edge id="4089" label="Node 1 (undirected) Q9JM76" source="4087" target="512" cy:directed="0"/>
      <edge id="4088" label="Node 1 (undirected) P59999" source="4087" target="398" cy:directed="0"/>
    </graph>
  </att>
  <att>
    <graph id="4095" label="Synaptic Vesicle Cycle Subnetwork" cy:registered="1">
      <node xlink:href="#236"/>
      <node xlink:href="#490"/>
      <node xlink:href="#233"/>
      <node xlink:href="#616"/>
      <node xlink:href="#615"/>
      <node xlink:href="#359"/>
      <node xlink:href="#611"/>
      <node xlink:href="#354"/>
      <node xlink:href="#353"/>
      <node xlink:href="#352"/>
      <node xlink:href="#607"/>
      <node xlink:href="#93"/>
      <node xlink:href="#600"/>
      <node xlink:href="#216"/>
      <node xlink:href="#599"/>
      <node xlink:href="#343"/>
      <node xlink:href="#598"/>
      <node xlink:href="#470"/>
      <node xlink:href="#597"/>
      <node xlink:href="#211"/>
      <node xlink:href="#83"/>
      <node xlink:href="#593"/>
      <node xlink:href="#81"/>
      <node xlink:href="#592"/>
      <node xlink:href="#77"/>
      <node xlink:href="#331"/>
      <node xlink:href="#200"/>
      <node xlink:href="#197"/>
      <node xlink:href="#321"/>
      <node xlink:href="#442"/>
      <node xlink:href="#569"/>
      <node xlink:href="#565"/>
      <node xlink:href="#309"/>
      <node xlink:href="#564"/>
      <node xlink:href="#435"/>
      <node xlink:href="#434"/>
      <node xlink:href="#561"/>
      <node xlink:href="#557"/>
      <node xlink:href="#426"/>
      <node xlink:href="#297"/>
      <node xlink:href="#423"/>
      <node xlink:href="#165"/>
      <node xlink:href="#672"/>
      <node xlink:href="#667"/>
      <node xlink:href="#283"/>
      <node xlink:href="#666"/>
      <node xlink:href="#154"/>
      <node xlink:href="#536"/>
      <node xlink:href="#530"/>
      <node xlink:href="#274"/>
      <node xlink:href="#529"/>
      <node xlink:href="#401"/>
      <node xlink:href="#271"/>
      <node xlink:href="#652"/>
      <node xlink:href="#395"/>
      <node xlink:href="#394"/>
      <node xlink:href="#521"/>
      <node xlink:href="#393"/>
      <node xlink:href="#520"/>
      <node xlink:href="#133"/>
      <node xlink:href="#260"/>
      <node xlink:href="#515"/>
      <node xlink:href="#514"/>
      <node xlink:href="#509"/>
      <node xlink:href="#380"/>
      <node xlink:href="#378"/>
      <node xlink:href="#120"/>
      <node xlink:href="#375"/>
      <node xlink:href="#500"/>
      <edge xlink:href="#1843"/>
      <edge xlink:href="#1844"/>
      <edge xlink:href="#1846"/>
      <edge xlink:href="#1847"/>
      <edge xlink:href="#1849"/>
      <edge xlink:href="#1851"/>
      <edge xlink:href="#1852"/>
      <edge xlink:href="#866"/>
      <edge xlink:href="#3031"/>
      <edge xlink:href="#3032"/>
      <edge xlink:href="#3033"/>
      <edge xlink:href="#3036"/>
      <edge xlink:href="#3038"/>
      <edge xlink:href="#3040"/>
      <edge xlink:href="#3041"/>
      <edge xlink:href="#3043"/>
      <edge xlink:href="#3044"/>
      <edge xlink:href="#3045"/>
      <edge xlink:href="#3027"/>
      <edge xlink:href="#3028"/>
      <edge xlink:href="#3029"/>
      <edge xlink:href="#3030"/>
      <edge xlink:href="#1170"/>
      <edge xlink:href="#1171"/>
      <edge xlink:href="#1154"/>
      <edge xlink:href="#1155"/>
      <edge xlink:href="#1157"/>
      <edge xlink:href="#1158"/>
      <edge xlink:href="#1160"/>
      <edge xlink:href="#1161"/>
      <edge xlink:href="#1151"/>
      <edge xlink:href="#1152"/>
      <edge xlink:href="#1139"/>
      <edge xlink:href="#1142"/>
      <edge xlink:href="#1143"/>
      <edge xlink:href="#1145"/>
      <edge xlink:href="#1146"/>
      <edge xlink:href="#1147"/>
      <edge xlink:href="#1148"/>
      <edge xlink:href="#2939"/>
      <edge xlink:href="#2940"/>
      <edge xlink:href="#2941"/>
      <edge xlink:href="#2942"/>
      <edge xlink:href="#2910"/>
      <edge xlink:href="#2911"/>
      <edge xlink:href="#2912"/>
      <edge xlink:href="#2914"/>
      <edge xlink:href="#2915"/>
      <edge xlink:href="#2917"/>
      <edge xlink:href="#2918"/>
      <edge xlink:href="#2919"/>
      <edge xlink:href="#852"/>
      <edge xlink:href="#2908"/>
      <edge xlink:href="#2909"/>
      <edge xlink:href="#1111"/>
      <edge xlink:href="#1113"/>
      <edge xlink:href="#2897"/>
      <edge xlink:href="#2899"/>
      <edge xlink:href="#2900"/>
      <edge xlink:href="#2903"/>
      <edge xlink:href="#2904"/>
      <edge xlink:href="#2905"/>
      <edge xlink:href="#1672"/>
      <edge xlink:href="#1679"/>
      <edge xlink:href="#2865"/>
      <edge xlink:href="#2869"/>
      <edge xlink:href="#2873"/>
      <edge xlink:href="#2876"/>
      <edge xlink:href="#2882"/>
      <edge xlink:href="#2885"/>
      <edge xlink:href="#2890"/>
      <edge xlink:href="#839"/>
      <edge xlink:href="#840"/>
      <edge xlink:href="#2822"/>
      <edge xlink:href="#2823"/>
      <edge xlink:href="#2826"/>
      <edge xlink:href="#2828"/>
      <edge xlink:href="#2835"/>
      <edge xlink:href="#2836"/>
      <edge xlink:href="#2845"/>
      <edge xlink:href="#2847"/>
      <edge xlink:href="#2848"/>
      <edge xlink:href="#2849"/>
      <edge xlink:href="#697"/>
      <edge xlink:href="#2815"/>
      <edge xlink:href="#2816"/>
      <edge xlink:href="#2818"/>
      <edge xlink:href="#693"/>
      <edge xlink:href="#1048"/>
      <edge xlink:href="#1049"/>
      <edge xlink:href="#1050"/>
      <edge xlink:href="#1052"/>
      <edge xlink:href="#1053"/>
      <edge xlink:href="#1054"/>
      <edge xlink:href="#1055"/>
      <edge xlink:href="#2572"/>
      <edge xlink:href="#2574"/>
      <edge xlink:href="#2575"/>
      <edge xlink:href="#2510"/>
      <edge xlink:href="#2511"/>
      <edge xlink:href="#2515"/>
      <edge xlink:href="#2516"/>
      <edge xlink:href="#2517"/>
      <edge xlink:href="#2520"/>
      <edge xlink:href="#2521"/>
      <edge xlink:href="#2528"/>
      <edge xlink:href="#2532"/>
      <edge xlink:href="#2533"/>
      <edge xlink:href="#2537"/>
      <edge xlink:href="#2539"/>
      <edge xlink:href="#2551"/>
      <edge xlink:href="#2552"/>
      <edge xlink:href="#2557"/>
      <edge xlink:href="#2558"/>
      <edge xlink:href="#2562"/>
      <edge xlink:href="#2565"/>
      <edge xlink:href="#1025"/>
      <edge xlink:href="#1026"/>
      <edge xlink:href="#1027"/>
      <edge xlink:href="#1029"/>
      <edge xlink:href="#1030"/>
      <edge xlink:href="#2499"/>
      <edge xlink:href="#2500"/>
      <edge xlink:href="#2501"/>
      <edge xlink:href="#2503"/>
      <edge xlink:href="#2504"/>
      <edge xlink:href="#2506"/>
      <edge xlink:href="#2507"/>
      <edge xlink:href="#2508"/>
      <edge xlink:href="#2509"/>
      <edge xlink:href="#1464"/>
      <edge xlink:href="#1465"/>
      <edge xlink:href="#1468"/>
      <edge xlink:href="#1470"/>
      <edge xlink:href="#1471"/>
      <edge xlink:href="#1473"/>
      <edge xlink:href="#1474"/>
      <edge xlink:href="#1476"/>
      <edge xlink:href="#1462"/>
      <edge xlink:href="#2492"/>
      <edge xlink:href="#2493"/>
      <edge xlink:href="#2495"/>
      <edge xlink:href="#2473"/>
      <edge xlink:href="#1427"/>
      <edge xlink:href="#1428"/>
      <edge xlink:href="#1429"/>
      <edge xlink:href="#1430"/>
      <edge xlink:href="#1433"/>
      <edge xlink:href="#1435"/>
      <edge xlink:href="#1438"/>
      <edge xlink:href="#1439"/>
      <edge xlink:href="#1422"/>
      <edge xlink:href="#780"/>
      <edge xlink:href="#781"/>
      <edge xlink:href="#3778"/>
      <edge xlink:href="#3780"/>
      <edge xlink:href="#3719"/>
      <edge xlink:href="#3720"/>
      <edge xlink:href="#3722"/>
      <edge xlink:href="#3723"/>
      <edge xlink:href="#3724"/>
      <edge xlink:href="#3725"/>
      <edge xlink:href="#3726"/>
      <edge xlink:href="#3727"/>
      <edge xlink:href="#3712"/>
      <edge xlink:href="#3713"/>
      <edge xlink:href="#3715"/>
      <edge xlink:href="#3716"/>
      <edge xlink:href="#3717"/>
      <edge xlink:href="#762"/>
      <edge xlink:href="#2179"/>
      <edge xlink:href="#2180"/>
      <edge xlink:href="#2181"/>
      <edge xlink:href="#2183"/>
      <edge xlink:href="#2134"/>
      <edge xlink:href="#2135"/>
      <edge xlink:href="#925"/>
      <edge xlink:href="#1312"/>
      <edge xlink:href="#1313"/>
      <edge xlink:href="#1282"/>
      <edge xlink:href="#1283"/>
      <edge xlink:href="#1280"/>
      <edge xlink:href="#2081"/>
      <edge xlink:href="#2082"/>
      <edge xlink:href="#2083"/>
      <edge xlink:href="#2084"/>
      <edge xlink:href="#2085"/>
      <edge xlink:href="#2086"/>
      <edge xlink:href="#2087"/>
      <edge xlink:href="#1277"/>
      <edge xlink:href="#1278"/>
      <edge xlink:href="#2077"/>
      <edge xlink:href="#2078"/>
      <edge xlink:href="#2079"/>
      <edge xlink:href="#732"/>
      <edge xlink:href="#903"/>
      <edge xlink:href="#2040"/>
      <edge xlink:href="#2044"/>
      <edge xlink:href="#2047"/>
      <edge xlink:href="#2048"/>
      <edge xlink:href="#2051"/>
      <edge xlink:href="#2052"/>
      <edge xlink:href="#1975"/>
      <edge xlink:href="#1976"/>
      <edge xlink:href="#1977"/>
      <edge xlink:href="#1979"/>
      <edge xlink:href="#1980"/>
      <edge xlink:href="#1983"/>
      <edge xlink:href="#1985"/>
      <edge xlink:href="#1986"/>
      <edge xlink:href="#1987"/>
      <edge xlink:href="#1988"/>
      <edge xlink:href="#1989"/>
      <edge xlink:href="#1990"/>
      <edge xlink:href="#1224"/>
      <edge xlink:href="#1227"/>
      <edge xlink:href="#722"/>
      <edge xlink:href="#1214"/>
      <edge xlink:href="#1910"/>
      <edge xlink:href="#1911"/>
      <edge xlink:href="#1912"/>
    </graph>
  </att>
  <att>
    <graph id="4105" label="Calcium Homeostasis Subnetwork" cy:registered="1">
      <node xlink:href="#236"/>
      <node xlink:href="#490"/>
      <node xlink:href="#100"/>
      <node xlink:href="#224"/>
      <node xlink:href="#216"/>
      <node xlink:href="#214"/>
      <node xlink:href="#84"/>
      <node xlink:href="#467"/>
      <node xlink:href="#83"/>
      <node xlink:href="#81"/>
      <node xlink:href="#203"/>
      <node xlink:href="#329"/>
      <node xlink:href="#328"/>
      <node xlink:href="#200"/>
      <node xlink:href="#326"/>
      <node xlink:href="#314"/>
      <node xlink:href="#185"/>
      <node xlink:href="#311"/>
      <node xlink:href="#565"/>
      <node xlink:href="#308"/>
      <node xlink:href="#562"/>
      <node xlink:href="#561"/>
      <node xlink:href="#300"/>
      <node xlink:href="#297"/>
      <node xlink:href="#295"/>
      <node xlink:href="#549"/>
      <node xlink:href="#161"/>
      <node xlink:href="#672"/>
      <node xlink:href="#157"/>
      <node xlink:href="#154"/>
      <node xlink:href="#152"/>
      <node xlink:href="#663"/>
      <node xlink:href="#662"/>
      <node xlink:href="#275"/>
      <node xlink:href="#530"/>
      <node xlink:href="#274"/>
      <node xlink:href="#146"/>
      <node xlink:href="#529"/>
      <node xlink:href="#271"/>
      <node xlink:href="#270"/>
      <node xlink:href="#269"/>
      <node xlink:href="#395"/>
      <node xlink:href="#394"/>
      <node xlink:href="#133"/>
      <node xlink:href="#383"/>
      <node xlink:href="#509"/>
      <node xlink:href="#121"/>
      <node xlink:href="#630"/>
      <node xlink:href="#500"/>
      <node xlink:href="#368"/>
      <node xlink:href="#111"/>
      <edge xlink:href="#1842"/>
      <edge xlink:href="#1844"/>
      <edge xlink:href="#1846"/>
      <edge xlink:href="#1847"/>
      <edge xlink:href="#1852"/>
      <edge xlink:href="#706"/>
      <edge xlink:href="#851"/>
      <edge xlink:href="#848"/>
      <edge xlink:href="#1669"/>
      <edge xlink:href="#697"/>
      <edge xlink:href="#1070"/>
      <edge xlink:href="#1067"/>
      <edge xlink:href="#1062"/>
      <edge xlink:href="#1040"/>
      <edge xlink:href="#807"/>
      <edge xlink:href="#1034"/>
      <edge xlink:href="#1035"/>
      <edge xlink:href="#2525"/>
      <edge xlink:href="#2528"/>
      <edge xlink:href="#2533"/>
      <edge xlink:href="#2537"/>
      <edge xlink:href="#2538"/>
      <edge xlink:href="#2539"/>
      <edge xlink:href="#2545"/>
      <edge xlink:href="#2557"/>
      <edge xlink:href="#2559"/>
      <edge xlink:href="#2562"/>
      <edge xlink:href="#2512"/>
      <edge xlink:href="#2517"/>
      <edge xlink:href="#2519"/>
      <edge xlink:href="#2520"/>
      <edge xlink:href="#2521"/>
      <edge xlink:href="#1022"/>
      <edge xlink:href="#2496"/>
      <edge xlink:href="#2492"/>
      <edge xlink:href="#2493"/>
      <edge xlink:href="#1003"/>
      <edge xlink:href="#1004"/>
      <edge xlink:href="#997"/>
      <edge xlink:href="#771"/>
      <edge xlink:href="#773"/>
      <edge xlink:href="#3778"/>
      <edge xlink:href="#3780"/>
      <edge xlink:href="#765"/>
      <edge xlink:href="#762"/>
      <edge xlink:href="#758"/>
      <edge xlink:href="#3693"/>
      <edge xlink:href="#3694"/>
      <edge xlink:href="#927"/>
      <edge xlink:href="#2134"/>
      <edge xlink:href="#2135"/>
      <edge xlink:href="#925"/>
      <edge xlink:href="#921"/>
      <edge xlink:href="#922"/>
      <edge xlink:href="#915"/>
      <edge xlink:href="#1282"/>
      <edge xlink:href="#1283"/>
      <edge xlink:href="#1280"/>
      <edge xlink:href="#732"/>
      <edge xlink:href="#1244"/>
      <edge xlink:href="#1976"/>
      <edge xlink:href="#1980"/>
      <edge xlink:href="#1985"/>
      <edge xlink:href="#1988"/>
      <edge xlink:href="#1989"/>
      <edge xlink:href="#1991"/>
      <edge xlink:href="#724"/>
      <edge xlink:href="#3227"/>
      <edge xlink:href="#1910"/>
      <edge xlink:href="#1911"/>
      <edge xlink:href="#1190"/>
      <edge xlink:href="#1192"/>
      <edge xlink:href="#716"/>
    </graph>
  </att>
  <node id="4115" label="4115"/>
</graph>
