# Supplementary material for: APP Is a Context-Sensitive Regulator of the Hippocampal Presynaptic Active Zone
Source: PLOS journal article supplement (doi:10.1371/journal.pcbi.1004832), 2016-04-19
Supplement: S6 (10.1371/journal.pcbi.1004832.s006) [file journal.pcbi.1004832.s006.cys › CytoscapeSession-2016_01_22-10_07/networks/4116-Core+Network+Subcommunities.xgmml]

<?xml version="1.0" encoding="UTF-8" standalone="yes"?>
<graph id="4116" label="Core Network Subcommunities" cy:view="0" cy:registered="0" cy:documentVersion="3.0" xmlns:dc="http://purl.org/dc/elements/1.1/" xmlns:xlink="http://www.w3.org/1999/xlink" xmlns:rdf="http://www.w3.org/1999/02/22-rdf-syntax-ns#" xmlns:cy="http://www.cytoscape.org" xmlns="http://www.cs.rpi.edu/XGMML">
  <att>
    <graph id="4132" label="Subcommunities" cy:registered="1">
      <node id="4756" label="Q00493"/>
      <node id="4755" label="Q9R1V4"/>
      <node id="4754" label="Q9R0P5"/>
      <node id="4753" label="O88342"/>
      <node id="4752" label="Q9DB73"/>
      <node id="4751" label="O54774"/>
      <node id="4750" label="Q8VHW2"/>
      <node id="4749" label="P58771"/>
      <node id="4748" label="Q03137"/>
      <node id="4747" label="Q9QYX7"/>
      <node id="4746" label="P23927"/>
      <node id="4745" label="Q9EQZ6"/>
      <node id="4744" label="P35802"/>
      <node id="4743" label="P80560"/>
      <node id="4742" label="Q60737"/>
      <node id="4741" label="Q9CR95"/>
      <node id="4740" label="Q4KMM3"/>
      <node id="4739" label="Q9Z0E0"/>
      <node id="4738" label="Q812A2"/>
      <node id="4737" label="Q9QZF2"/>
      <node id="4736" label="Q91ZZ3"/>
      <node id="4735" label="Q8K400"/>
      <node id="4734" label="Q91WS0"/>
      <node id="4733" label="Q9JIA1"/>
      <node id="4732" label="O89053"/>
      <node id="4731" label="P53994"/>
      <node id="4730" label="A2CG49"/>
      <node id="4729" label="Q810U4"/>
      <node id="4728" label="D3YVF0"/>
      <node id="4727" label="Q9ES97"/>
      <node id="4726" label="Q9R1V7"/>
      <node id="4725" label="Q6URW6"/>
      <node id="4724" label="Q9D6K5"/>
      <node id="4723" label="Q99KB8"/>
      <node id="4722" label="Q9CYT6"/>
      <node id="4721" label="Q9D8Y0"/>
      <node id="4720" label="Q9Z0P4"/>
      <node id="4719" label="Q04447"/>
      <node id="4718" label="Q9Z2W9"/>
      <node id="4717" label="Q63810"/>
      <node id="4716" label="Q61330"/>
      <node id="4715" label="P13020"/>
      <node id="4714" label="Q8K0T0"/>
      <node id="4713" label="Q9CWS0"/>
      <node id="4712" label="Q80XN0"/>
      <node id="4711" label="P43006"/>
      <node id="4710" label="Q9ERD7"/>
      <node id="4709" label="Q921J2"/>
      <node id="4708" label="Q9CQW1"/>
      <node id="4707" label="Q6P9K9"/>
      <node id="4706" label="Q9CZW5"/>
      <node id="4705" label="P20152"/>
      <node id="4704" label="Q8BRT1"/>
      <node id="4703" label="Q8BH59"/>
      <node id="4702" label="Q921M7"/>
      <node id="4701" label="F6SEU4"/>
      <node id="4700" label="Q8R366"/>
      <node id="4699" label="Q9QYA2"/>
      <node id="4698" label="Q61206"/>
      <node id="4697" label="Q3ULJ0"/>
      <node id="4696" label="Q8CGK3"/>
      <node id="4695" label="Q03157"/>
      <node id="4694" label="Q8R5C5"/>
      <node id="4693" label="Q78IK2"/>
      <node id="4692" label="Q91VT4"/>
      <node id="4691" label="Q61151"/>
      <node id="4690" label="Q3THE2"/>
      <node id="4689" label="Q920P5"/>
      <node id="4688" label="Q2PFD7"/>
      <node id="4687" label="Q7TMM9"/>
      <node id="4686" label="Q68FH0"/>
      <node id="4685" label="Q91VR7"/>
      <node id="4684" label="Q9CR62"/>
      <node id="4683" label="Q8CHH9"/>
      <node id="4682" label="P97300"/>
      <node id="4681" label="Q60634"/>
      <node id="4680" label="O08917"/>
      <node id="4679" label="Q61316"/>
      <node id="4678" label="Q9D1T0"/>
      <node id="4677" label="P48036"/>
      <node id="4676" label="P11798"/>
      <node id="4675" label="Q8K183"/>
      <node id="4674" label="Q99NE5"/>
      <node id="4673" label="Q9CR16"/>
      <node id="4672" label="P57780"/>
      <node id="4671" label="Q9QY76"/>
      <node id="4670" label="P23242"/>
      <node id="4669" label="Q9R1V6"/>
      <node id="4668" label="P48758"/>
      <node id="4667" label="Q91XV3"/>
      <node id="4666" label="P55302"/>
      <node id="4665" label="Q8BIJ6"/>
      <node id="4664" label="O88643"/>
      <node id="4663" label="Q80TZ3"/>
      <node id="4662" label="Q7TMB8"/>
      <node id="4661" label="Q9WV55"/>
      <node id="4660" label="O55131"/>
      <node id="4659" label="O35136"/>
      <node id="4658" label="Q7TSJ2"/>
      <node id="4657" label="P12960"/>
      <node id="4656" label="Q61699"/>
      <node id="4655" label="P08553"/>
      <node id="4654" label="Q8K4Z3"/>
      <node id="4653" label="P08551"/>
      <node id="4652" label="Q8VDQ8"/>
      <node id="4651" label="O54983"/>
      <node id="4650" label="P40124"/>
      <node id="4649" label="P18760"/>
      <node id="4648" label="Q9Z2I0"/>
      <node id="4647" label="Q9Z2Q6"/>
      <node id="4646" label="Q9WV34"/>
      <node id="4645" label="P42208"/>
      <node id="4644" label="P28661"/>
      <node id="4643" label="P26645"/>
      <node id="4642" label="P84096"/>
      <node id="4641" label="O35143"/>
      <node id="4640" label="P48722"/>
      <node id="4639" label="P63321"/>
      <node id="4638" label="Q8K021"/>
      <node id="4637" label="Q8CI94"/>
      <node id="4636" label="P48962"/>
      <node id="4635" label="Q71LX4"/>
      <node id="4634" label="P43406"/>
      <node id="4633" label="Q9D880"/>
      <node id="4632" label="O35857"/>
      <node id="4631" label="Q9CWZ7"/>
      <node id="4630" label="P28740"/>
      <node id="4629" label="Q922H2"/>
      <node id="4628" label="P46096"/>
      <node id="4627" label="Q61490"/>
      <node id="4626" label="Q9CZ42"/>
      <node id="4625" label="P35564"/>
      <node id="4624" label="P19096"/>
      <node id="4623" label="Q61644"/>
      <node id="4622" label="Q8BZ98"/>
      <node id="4621" label="Q5RJI5"/>
      <node id="4620" label="O55100"/>
      <node id="4619" label="P61164"/>
      <node id="4618" label="Q8R191"/>
      <node id="4617" label="O35643"/>
      <node id="4616" label="Q99P72"/>
      <node id="4615" label="Q60930"/>
      <node id="4614" label="P20444"/>
      <node id="4613" label="Q9QXS1"/>
      <node id="4612" label="O08599"/>
      <node id="4611" label="Q8BW75"/>
      <node id="4610" label="O35239"/>
      <node id="4609" label="Q5DQR4"/>
      <node id="4608" label="Q9EPJ9"/>
      <node id="4607" label="P00405"/>
      <node id="4606" label="P56564"/>
      <node id="4605" label="P70296"/>
      <node id="4604" label="P63318"/>
      <node id="4603" label="P27546"/>
      <node id="4602" label="P58281"/>
      <node id="4601" label="Q8R3V5"/>
      <node id="4600" label="P67871"/>
      <node id="4599" label="Q810U3"/>
      <node id="4598" label="Q61553"/>
      <node id="4597" label="Q80U28"/>
      <node id="4596" label="P19246"/>
      <node id="4595" label="P62743"/>
      <node id="4594" label="P22723"/>
      <node id="4593" label="Q60605"/>
      <node id="4592" label="P47708"/>
      <node id="4591" label="Q8VBV7"/>
      <node id="4590" label="Q9DC28"/>
      <node id="4589" label="P35279"/>
      <node id="4588" label="Q9CRB9"/>
      <node id="4587" label="Q9CQI6"/>
      <node id="4586" label="P62821"/>
      <node id="4585" label="P50396"/>
      <node id="4584" label="Q9WU78"/>
      <node id="4583" label="P0C0A3"/>
      <node id="4582" label="Q9R0P9"/>
      <node id="4581" label="Q80UU9"/>
      <node id="4580" label="O55023"/>
      <node id="4579" label="Q60875"/>
      <node id="4578" label="Q61411"/>
      <node id="4577" label="Q8CHC4"/>
      <node id="4576" label="Q91VZ6"/>
      <node id="4575" label="Q9WUB3"/>
      <node id="4574" label="Q62465"/>
      <node id="4573" label="Q9D0F9"/>
      <node id="4572" label="Q9R111"/>
      <node id="4571" label="Q6PIC6"/>
      <node id="4570" label="Q80VP1"/>
      <node id="4569" label="P68181"/>
      <node id="4568" label="P28663"/>
      <node id="4567" label="Q6P1F6"/>
      <node id="4566" label="P41216"/>
      <node id="4565" label="Q9D6F9"/>
      <node id="4564" label="Q99PJ0"/>
      <node id="4563" label="Q99MR8"/>
      <node id="4562" label="Q8BH04"/>
      <node id="4561" label="Q8BWF0"/>
      <node id="4560" label="Q91WC3"/>
      <node id="4559" label="Q3UVX5"/>
      <node id="4558" label="P20357"/>
      <node id="4557" label="P01831"/>
      <node id="4556" label="Q9D8B3"/>
      <node id="4555" label="P28667"/>
      <node id="4554" label="O55042"/>
      <node id="4553" label="P63328"/>
      <node id="4552" label="Q91ZJ5"/>
      <node id="4551" label="P60469"/>
      <node id="4550" label="Q62419"/>
      <node id="4549" label="P45376"/>
      <node id="4548" label="O54991"/>
      <node id="4547" label="B9EKR1"/>
      <node id="4546" label="Q9QYR6"/>
      <node id="4545" label="O08585"/>
      <node id="4544" label="Q60932"/>
      <node id="4543" label="Q3UHL1"/>
      <node id="4542" label="Q9CPQ1"/>
      <node id="4541" label="Q5SQX6"/>
      <node id="4540" label="Q80Y14"/>
      <node id="4539" label="Q9Z0R4"/>
      <node id="4538" label="P00493"/>
      <node id="4537" label="P60761"/>
      <node id="4536" label="Q64332"/>
      <node id="4535" label="O70318"/>
      <node id="4534" label="O08539"/>
      <node id="4533" label="Q9CS84"/>
      <node id="4532" label="P40630"/>
      <node id="4531" label="Q9JIS5"/>
      <node id="4530" label="Q8BYM5"/>
      <node id="4529" label="Q4ACU6"/>
      <node id="4528" label="P48453"/>
      <node id="4527" label="Q925I1"/>
      <node id="4526" label="Q62261"/>
      <node id="4525" label="Q9R0N7"/>
      <node id="4524" label="Q60996"/>
      <node id="4523" label="P62482"/>
      <node id="4522" label="P30999"/>
      <node id="4521" label="Q68FF6"/>
      <node id="4520" label="P23818"/>
      <node id="4519" label="Q9DBJ1"/>
      <node id="4518" label="P68254"/>
      <node id="4517" label="P62204"/>
      <node id="4516" label="P17156"/>
      <node id="4515" label="Q99K85"/>
      <node id="4514" label="P28652"/>
      <node id="4513" label="P70414"/>
      <node id="4512" label="Q6PIE5"/>
      <node id="4511" label="P47802"/>
      <node id="4510" label="Q9R0Y5"/>
      <node id="4509" label="P68033"/>
      <node id="4508" label="Q9QXJ1"/>
      <node id="4507" label="P84091"/>
      <node id="4506" label="Q9Z218"/>
      <node id="4505" label="P99024"/>
      <node id="4504" label="P03995"/>
      <node id="4503" label="P16330"/>
      <node id="4502" label="O70589"/>
      <node id="4501" label="Q8BKX1"/>
      <node id="4500" label="P13595"/>
      <node id="4499" label="P11627"/>
      <node id="4498" label="P62746"/>
      <node id="4497" label="P16858"/>
      <node id="4496" label="Q8VD37"/>
      <node id="4495" label="Q8QZT1"/>
      <node id="4494" label="Q60931"/>
      <node id="4493" label="P17665"/>
      <node id="4492" label="Q9JLZ3"/>
      <node id="4491" label="Q8CAQ8"/>
      <node id="4490" label="Q99L43"/>
      <node id="4489" label="Q8VDP6"/>
      <node id="4488" label="Q9Z0X1"/>
      <node id="4487" label="P61161"/>
      <node id="4486" label="Q60598"/>
      <node id="4485" label="P63011"/>
      <node id="4484" label="P38647"/>
      <node id="4483" label="Q62425"/>
      <node id="4482" label="Q8BMF3"/>
      <node id="4481" label="Q9Z1J3"/>
      <node id="4480" label="Q9DCB8"/>
      <node id="4479" label="O88712"/>
      <node id="4478" label="Q8BHL5"/>
      <node id="4477" label="Q9QXS6"/>
      <node id="4476" label="P17183"/>
      <node id="4475" label="Q6IRU5"/>
      <node id="4474" label="Q9DBG3"/>
      <node id="4473" label="P55088"/>
      <node id="4472" label="P10637"/>
      <node id="4471" label="Q922R8"/>
      <node id="4470" label="P68368"/>
      <node id="4469" label="P47857"/>
      <node id="4468" label="Q9D6M3"/>
      <node id="4467" label="Q62048"/>
      <node id="4466" label="Q99104"/>
      <node id="4465" label="P60766"/>
      <node id="4464" label="Q6R891"/>
      <node id="4463" label="P62835"/>
      <node id="4462" label="Q8BLK3"/>
      <node id="4461" label="Q91ZX7"/>
      <node id="4460" label="P08226"/>
      <node id="4459" label="Q8R0S4"/>
      <node id="4458" label="Q61290"/>
      <node id="4457" label="P42125"/>
      <node id="4456" label="Q8BGD5"/>
      <node id="4455" label="Q9Z268"/>
      <node id="4454" label="Q8BMS1"/>
      <node id="4453" label="P17182"/>
      <node id="4452" label="Q9CPW4"/>
      <node id="4451" label="Q8BKZ9"/>
      <node id="4450" label="P05063"/>
      <node id="4449" label="Q60597"/>
      <node id="4448" label="Q9WUA3"/>
      <node id="4447" label="P61982"/>
      <node id="4446" label="P07901"/>
      <node id="4445" label="P06837"/>
      <node id="4444" label="P15116"/>
      <node id="4443" label="Q7TQF7"/>
      <node id="4442" label="Q99L47"/>
      <node id="4441" label="P29758"/>
      <node id="4440" label="Q8CHT0"/>
      <node id="4439" label="P97772"/>
      <node id="4438" label="Q8BR92"/>
      <node id="4437" label="P31324"/>
      <node id="4436" label="Q6PB66"/>
      <node id="4435" label="P39053"/>
      <node id="4434" label="Q6PH08"/>
      <node id="4433" label="O88737"/>
      <node id="4432" label="Q9CQC7"/>
      <node id="4431" label="Q9CVB6"/>
      <node id="4430" label="P59999"/>
      <node id="4429" label="Q8CHU3"/>
      <node id="4428" label="Q5FWK3"/>
      <node id="4427" label="Q9WTT4"/>
      <node id="4426" label="Q00612"/>
      <node id="4425" label="Q9D6J5"/>
      <node id="4424" label="P23506"/>
      <node id="4423" label="Q6PCP5"/>
      <node id="4422" label="Q8VDN2"/>
      <node id="4421" label="Q64516"/>
      <node id="4420" label="Q9DBF1"/>
      <node id="4419" label="Q8R001"/>
      <node id="4418" label="Q9QWI6"/>
      <node id="4417" label="P63101"/>
      <node id="4416" label="Q61879"/>
      <node id="4415" label="Q91ZA3"/>
      <node id="4414" label="Q3UMR5"/>
      <node id="4413" label="P56382"/>
      <node id="4412" label="P09103"/>
      <node id="4411" label="P14873"/>
      <node id="4410" label="P43024"/>
      <node id="4409" label="Q62420"/>
      <node id="4408" label="Q9EP69"/>
      <node id="4407" label="P26040"/>
      <node id="4406" label="P70441"/>
      <node id="4405" label="P61264"/>
      <node id="4404" label="Q7TPR4"/>
      <node id="4403" label="Q3UTJ2"/>
      <node id="4402" label="P06745"/>
      <node id="4401" label="Q920I9"/>
      <node id="4400" label="Q923T9"/>
      <node id="4399" label="P63040"/>
      <node id="4398" label="Q61831"/>
      <node id="4397" label="P50544"/>
      <node id="4396" label="Q9Z2I9"/>
      <node id="4395" label="Q61301"/>
      <node id="4394" label="Q9DB05"/>
      <node id="4393" label="P52480"/>
      <node id="4392" label="Q93092"/>
      <node id="4391" label="Q9JHI5"/>
      <node id="4390" label="P53395"/>
      <node id="4389" label="Q9DBL1"/>
      <node id="4388" label="Q8K1M6"/>
      <node id="4387" label="Q9CQ92"/>
      <node id="4386" label="P63082"/>
      <node id="4385" label="Q8BPN8"/>
      <node id="4384" label="O35465"/>
      <node id="4383" label="P18572"/>
      <node id="4382" label="P09671"/>
      <node id="4381" label="P16054"/>
      <node id="4380" label="P62962"/>
      <node id="4379" label="Q61102"/>
      <node id="4378" label="P22315"/>
      <node id="4377" label="P35486"/>
      <node id="4376" label="Q9CZT8"/>
      <node id="4375" label="P47754"/>
      <node id="4374" label="P14094"/>
      <node id="4373" label="Q99JY9"/>
      <node id="4372" label="Q99MN9"/>
      <node id="4371" label="Q99PT1"/>
      <node id="4370" label="P62823"/>
      <node id="4369" label="O88935"/>
      <node id="4368" label="P97450"/>
      <node id="4367" label="Q64010"/>
      <node id="4366" label="Q9JLM8"/>
      <node id="4365" label="P20108"/>
      <node id="4364" label="Q9QUH0"/>
      <node id="4363" label="Q64521"/>
      <node id="4362" label="P13707"/>
      <node id="4361" label="Q9R0K7"/>
      <node id="4360" label="Q80T41"/>
      <node id="4359" label="Q9D898"/>
      <node id="4358" label="P63017"/>
      <node id="4357" label="P45878"/>
      <node id="4356" label="Q61548"/>
      <node id="4355" label="P12367"/>
      <node id="4354" label="Q9D023"/>
      <node id="4353" label="P56379"/>
      <node id="4352" label="P18052"/>
      <node id="4351" label="P70232"/>
      <node id="4350" label="Q9CZS1"/>
      <node id="4349" label="O35129"/>
      <node id="4348" label="O88696"/>
      <node id="4347" label="Q9CQQ7"/>
      <node id="4346" label="Q9JJV2"/>
      <node id="4345" label="Q9DC69"/>
      <node id="4344" label="Q91VM9"/>
      <node id="4343" label="Q9DB77"/>
      <node id="4342" label="Q8K3J1"/>
      <node id="4341" label="Q9D855"/>
      <node id="4340" label="Q9JHU4"/>
      <node id="4339" label="P46660"/>
      <node id="4338" label="P63044"/>
      <node id="4337" label="Q62351"/>
      <node id="4336" label="P63001"/>
      <node id="4335" label="Q8BG51"/>
      <node id="4334" label="Q9CXZ1"/>
      <node id="4333" label="Q60676"/>
      <node id="4332" label="Q8JZN5"/>
      <node id="4331" label="Q8JZQ2"/>
      <node id="4330" label="P51174"/>
      <node id="4329" label="Q8VDD5"/>
      <node id="4328" label="P18872"/>
      <node id="4327" label="Q9CQ75"/>
      <node id="4326" label="P03930"/>
      <node id="4325" label="P49615"/>
      <node id="4324" label="P39688"/>
      <node id="4323" label="P04925"/>
      <node id="4322" label="Q99JY0"/>
      <node id="4321" label="O08756"/>
      <node id="4320" label="P28660"/>
      <node id="4319" label="P60879"/>
      <node id="4318" label="Q9DCJ5"/>
      <node id="4317" label="Q91YT0"/>
      <node id="4316" label="Q9JM76"/>
      <node id="4315" label="Q9R0Q6"/>
      <node id="4314" label="Q68FD5"/>
      <node id="4313" label="Q9QYJ0"/>
      <node id="4312" label="Q60864"/>
      <node id="4311" label="P19536"/>
      <node id="4310" label="Q99N28"/>
      <node id="4309" label="Q9JLB0"/>
      <node id="4308" label="Q8BVE3"/>
      <node id="4307" label="P50518"/>
      <node id="4306" label="P97797"/>
      <node id="4305" label="Q61735"/>
      <node id="4304" label="Q9DCX2"/>
      <node id="4303" label="Q7TMF3"/>
      <node id="4302" label="O35658"/>
      <node id="4301" label="Q99KR7"/>
      <node id="4300" label="Q9EQ20"/>
      <node id="4299" label="P62874"/>
      <node id="4298" label="P63213"/>
      <node id="4297" label="P40142"/>
      <node id="4296" label="Q9CQR4"/>
      <node id="4295" label="Q9CQV8"/>
      <node id="4294" label="P99029"/>
      <node id="4293" label="P62073"/>
      <node id="4292" label="Q62277"/>
      <node id="4291" label="Q60631"/>
      <node id="4290" label="P52503"/>
      <node id="4289" label="Q8R4N0"/>
      <node id="4288" label="Q3ULD5"/>
      <node id="4287" label="Q8VEM8"/>
      <node id="4286" label="P68369"/>
      <node id="4285" label="Q8K2B3"/>
      <node id="4284" label="Q91WD5"/>
      <node id="4283" label="P51881"/>
      <node id="4282" label="P05480"/>
      <node id="4281" label="Q02248"/>
      <node id="4280" label="P60710"/>
      <node id="4279" label="Q6PHZ2"/>
      <node id="4278" label="P97807"/>
      <node id="4277" label="Q9ERS2"/>
      <node id="4276" label="Q99KI0"/>
      <node id="4275" label="O08788"/>
      <node id="4274" label="Q99KJ8"/>
      <node id="4273" label="Q91Z53"/>
      <node id="4272" label="P26443"/>
      <node id="4271" label="Q62442"/>
      <node id="4270" label="Q9D172"/>
      <node id="4269" label="P56391"/>
      <node id="4268" label="Q9WV18"/>
      <node id="4267" label="O35526"/>
      <node id="4266" label="Q8R5M8"/>
      <node id="4265" label="Q9WV92"/>
      <node id="4264" label="P62814"/>
      <node id="4263" label="P12023"/>
      <node id="4262" label="P61922"/>
      <node id="4261" label="P48320"/>
      <node id="4260" label="P17710"/>
      <node id="4259" label="P05064"/>
      <node id="4258" label="P11499"/>
      <node id="4257" label="Q8K1Z0"/>
      <node id="4256" label="P62331"/>
      <node id="4255" label="Q99LX0"/>
      <node id="4254" label="Q8BGH2"/>
      <node id="4253" label="Q99LC5"/>
      <node id="4252" label="Q61425"/>
      <node id="4251" label="P12787"/>
      <node id="4250" label="Q9CQA3"/>
      <node id="4249" label="Q8BWT1"/>
      <node id="4248" label="Q921G7"/>
      <node id="4247" label="Q9Z1B3"/>
      <node id="4246" label="O70161"/>
      <node id="4245" label="Q6PER3"/>
      <node id="4244" label="P63005"/>
      <node id="4243" label="P47738"/>
      <node id="4242" label="Q64133"/>
      <node id="4241" label="P48771"/>
      <node id="4240" label="O70325"/>
      <node id="4239" label="P62812"/>
      <node id="4238" label="P63137"/>
      <node id="4237" label="Q9Z1P6"/>
      <node id="4236" label="P09411"/>
      <node id="4235" label="P17751"/>
      <node id="4234" label="Q7TQI3"/>
      <node id="4233" label="O88441"/>
      <node id="4232" label="P70404"/>
      <node id="4231" label="P50516"/>
      <node id="4230" label="P57746"/>
      <node id="4229" label="P17426"/>
      <node id="4228" label="P17427"/>
      <node id="4227" label="P31938"/>
      <node id="4226" label="Q3UIU2"/>
      <node id="4225" label="Q9D2G2"/>
      <node id="4224" label="P62897"/>
      <node id="4223" label="Q9CQ62"/>
      <node id="4222" label="Q08331"/>
      <node id="4221" label="P46460"/>
      <node id="4220" label="P15105"/>
      <node id="4219" label="Q9CPP6"/>
      <node id="4218" label="Q9DCW4"/>
      <node id="4217" label="P63037"/>
      <node id="4216" label="Q9CQN1"/>
      <node id="4215" label="Q9D0K2"/>
      <node id="4214" label="Q9WUM5"/>
      <node id="4213" label="Q9Z1G4"/>
      <node id="4212" label="Q9D1K2"/>
      <node id="4211" label="Q9D0S9"/>
      <node id="4210" label="Q9DC70"/>
      <node id="4209" label="Q06185"/>
      <node id="4208" label="Q9CQJ8"/>
      <node id="4207" label="P05132"/>
      <node id="4206" label="P52196"/>
      <node id="4205" label="Q9CR68"/>
      <node id="4204" label="Q9DCS9"/>
      <node id="4203" label="Q91VD9"/>
      <node id="4202" label="Q9CPQ8"/>
      <node id="4201" label="Q91VR2"/>
      <node id="4200" label="Q9JLJ2"/>
      <node id="4199" label="P67778"/>
      <node id="4198" label="P68404"/>
      <node id="4197" label="P17742"/>
      <node id="4196" label="P56480"/>
      <node id="4195" label="Q61598"/>
      <node id="4194" label="P61027"/>
      <node id="4193" label="P63085"/>
      <node id="4192" label="Q05920"/>
      <node id="4191" label="Q8BMF4"/>
      <node id="4190" label="Q99LY9"/>
      <node id="4189" label="Q99LC3"/>
      <node id="4188" label="Q9D0M3"/>
      <node id="4187" label="Q9CZ13"/>
      <node id="4186" label="Q8BH95"/>
      <node id="4185" label="P63038"/>
      <node id="4184" label="Q8BK64"/>
      <node id="4183" label="P19783"/>
      <node id="4182" label="O88952"/>
      <node id="4181" label="Q6P9K8"/>
      <node id="4180" label="Q9Z2H5"/>
      <node id="4179" label="Q3UHD9"/>
      <node id="4178" label="Q9CQH3"/>
      <node id="4177" label="Q9DB20"/>
      <node id="4176" label="P06151"/>
      <node id="4175" label="P54071"/>
      <node id="4174" label="Q9D6R2"/>
      <node id="4173" label="P08249"/>
      <node id="4172" label="Q9CQ69"/>
      <node id="4171" label="Q9DCT2"/>
      <node id="4170" label="Q9CQ54"/>
      <node id="4169" label="Q9CQZ6"/>
      <node id="4168" label="Q76MZ3"/>
      <node id="4167" label="P63330"/>
      <node id="4166" label="P16546"/>
      <node id="4165" label="Q8C8R3"/>
      <node id="4164" label="P47757"/>
      <node id="4163" label="P62259"/>
      <node id="4162" label="Q9Z1G3"/>
      <node id="4161" label="P51863"/>
      <node id="4160" label="Q9DCD0"/>
      <node id="4159" label="Q9CZU6"/>
      <node id="4158" label="P35436"/>
      <node id="4157" label="P23819"/>
      <node id="4156" label="Q06335"/>
      <node id="4155" label="Q9QUI0"/>
      <node id="4154" label="P05202"/>
      <node id="4153" label="P35438"/>
      <node id="4152" label="P12382"/>
      <node id="4151" label="P68510"/>
      <node id="4150" label="Q03265"/>
      <node id="4149" label="O09111"/>
      <node id="4148" label="Q9D3D9"/>
      <node id="4147" label="Q9D051"/>
      <node id="4146" label="O08749"/>
      <node id="4145" label="Q9D6J6"/>
      <node id="4144" label="Q9CQZ5"/>
      <node id="4143" label="Q80Z38"/>
      <node id="4142" label="Q01097"/>
      <edge id="8146" label="Q00493 (pp) P12023" source="4756" target="4263" cy:directed="1"/>
      <edge id="8145" label="Q9R1V4 (pp) Q9JIA1" source="4755" target="4733" cy:directed="1"/>
      <edge id="8144" label="O88342 (pp) P18760" source="4753" target="4649" cy:directed="1"/>
      <edge id="8143" label="O88342 (pp) P47757" source="4753" target="4164" cy:directed="1"/>
      <edge id="8142" label="O88342 (pp) Q9CVB6" source="4753" target="4431" cy:directed="1"/>
      <edge id="8141" label="Q9DB73 (pp) Q91VR2" source="4752" target="4201" cy:directed="1"/>
      <edge id="8140" label="O54774 (pp) Q68FD5" source="4751" target="4314" cy:directed="1"/>
      <edge id="8139" label="Q8VHW2 (pp) P23819" source="4750" target="4157" cy:directed="1"/>
      <edge id="8138" label="P58771 (pp) P16054" source="4749" target="4381" cy:directed="1"/>
      <edge id="8137" label="Q03137 (pp) P39688" source="4748" target="4324" cy:directed="1"/>
      <edge id="8136" label="Q9QYX7 (pp) Q9EQZ6" source="4747" target="4745" cy:directed="1"/>
      <edge id="8135" label="P23927 (pp) P16054" source="4746" target="4381" cy:directed="1"/>
      <edge id="8134" label="P80560 (pp) P18052" source="4743" target="4352" cy:directed="1"/>
      <edge id="8133" label="Q9CR95 (pp) P17427" source="4741" target="4228" cy:directed="1"/>
      <edge id="8132" label="Q4KMM3 (pp) P50516" source="4740" target="4231" cy:directed="1"/>
      <edge id="8131" label="Q9QZF2 (pp) P12023" source="4737" target="4263" cy:directed="1"/>
      <edge id="8130" label="Q91WS0 (pp) Q9CQH3" source="4734" target="4178" cy:directed="1"/>
      <edge id="8129" label="Q9JIA1 (pp) Q01097" source="4733" target="4142" cy:directed="1"/>
      <edge id="8128" label="P53994 (pp) Q61598" source="4731" target="4195" cy:directed="1"/>
      <edge id="8127" label="D3YVF0 (pp) P48453" source="4728" target="4528" cy:directed="1"/>
      <edge id="8126" label="D3YVF0 (pp) P35438" source="4728" target="4153" cy:directed="1"/>
      <edge id="8125" label="Q9ES97 (pp) Q99P72" source="4727" target="4616" cy:directed="1"/>
      <edge id="8124" label="Q9ES97 (pp) Q8K0T0" source="4727" target="4714" cy:directed="1"/>
      <edge id="8123" label="Q9R1V7 (pp) Q9JIA1" source="4726" target="4733" cy:directed="1"/>
      <edge id="8122" label="Q9R1V7 (pp) P04925" source="4726" target="4323" cy:directed="1"/>
      <edge id="8121" label="Q9D6K5 (pp) Q8CHC4" source="4724" target="4577" cy:directed="1"/>
      <edge id="8120" label="Q9CYT6 (pp) P40124" source="4722" target="4650" cy:directed="1"/>
      <edge id="8119" label="Q04447 (pp) P63017" source="4719" target="4358" cy:directed="1"/>
      <edge id="8118" label="Q9Z2W9 (pp) P23819" source="4718" target="4157" cy:directed="1"/>
      <edge id="8117" label="Q63810 (pp) P48453" source="4717" target="4528" cy:directed="1"/>
      <edge id="8116" label="Q61330 (pp) B9EKR1" source="4716" target="4547" cy:directed="1"/>
      <edge id="8115" label="Q8K0T0 (pp) P50516" source="4714" target="4231" cy:directed="1"/>
      <edge id="8114" label="Q8K0T0 (pp) Q01097" source="4714" target="4142" cy:directed="1"/>
      <edge id="8113" label="Q9ERD7 (pp) P47757" source="4710" target="4164" cy:directed="1"/>
      <edge id="8112" label="Q921J2 (pp) P63101" source="4709" target="4417" cy:directed="1"/>
      <edge id="8111" label="Q9CQW1 (pp) P46460" source="4708" target="4221" cy:directed="1"/>
      <edge id="8110" label="Q6P9K9 (pp) Q8BYM5" source="4707" target="4530" cy:directed="1"/>
      <edge id="8109" label="Q6P9K9 (pp) O70589" source="4707" target="4502" cy:directed="1"/>
      <edge id="8108" label="Q9CZW5 (pp) P63038" source="4706" target="4185" cy:directed="1"/>
      <edge id="8107" label="Q9CZW5 (pp) Q6PB66" source="4706" target="4436" cy:directed="1"/>
      <edge id="8106" label="P20152 (pp) P16054" source="4705" target="4381" cy:directed="1"/>
      <edge id="8105" label="Q8BRT1 (pp) P28740" source="4704" target="4630" cy:directed="1"/>
      <edge id="8104" label="Q921M7 (pp) P68510" source="4702" target="4151" cy:directed="1"/>
      <edge id="8103" label="Q8R366 (pp) P04925" source="4700" target="4323" cy:directed="1"/>
      <edge id="8102" label="Q61206 (pp) P63005" source="4698" target="4244" cy:directed="1"/>
      <edge id="8101" label="Q03157 (pp) P12023" source="4695" target="4263" cy:directed="1"/>
      <edge id="8100" label="Q03157 (pp) Q9Z268" source="4695" target="4455" cy:directed="1"/>
      <edge id="8099" label="Q03157 (pp) Q9QXJ1" source="4695" target="4508" cy:directed="1"/>
      <edge id="8098" label="Q03157 (pp) P04925" source="4695" target="4323" cy:directed="1"/>
      <edge id="8097" label="Q8R5C5 (pp) P50516" source="4694" target="4231" cy:directed="1"/>
      <edge id="8096" label="Q91VT4 (pp) Q8QZT1" source="4692" target="4495" cy:directed="1"/>
      <edge id="8095" label="Q91VT4 (pp) Q9CR68" source="4692" target="4205" cy:directed="1"/>
      <edge id="8094" label="Q91VT4 (pp) Q99LC5" source="4692" target="4253" cy:directed="1"/>
      <edge id="8093" label="Q3THE2 (pp) Q01097" source="4690" target="4142" cy:directed="1"/>
      <edge id="8092" label="Q3THE2 (pp) P68510" source="4690" target="4151" cy:directed="1"/>
      <edge id="8091" label="Q920P5 (pp) P63101" source="4689" target="4417" cy:directed="1"/>
      <edge id="8090" label="Q2PFD7 (pp) P63101" source="4688" target="4417" cy:directed="1"/>
      <edge id="8089" label="Q7TMM9 (pp) P60879" source="4687" target="4319" cy:directed="1"/>
      <edge id="8088" label="Q7TMM9 (pp) P63101" source="4687" target="4417" cy:directed="1"/>
      <edge id="8087" label="Q91VR7 (pp) P14873" source="4685" target="4411" cy:directed="1"/>
      <edge id="8086" label="Q9CR62 (pp) Q9DC69" source="4684" target="4345" cy:directed="1"/>
      <edge id="8085" label="Q9CR62 (pp) Q9CZ13" source="4684" target="4187" cy:directed="1"/>
      <edge id="8084" label="Q8CHH9 (pp) P50516" source="4683" target="4231" cy:directed="1"/>
      <edge id="8083" label="P97300 (pp) Q99P72" source="4682" target="4616" cy:directed="1"/>
      <edge id="8082" label="O08917 (pp) Q60634" source="4680" target="4681" cy:directed="1"/>
      <edge id="8081" label="Q61316 (pp) Q60864" source="4679" target="4312" cy:directed="1"/>
      <edge id="8080" label="Q9D1T0 (pp) P12023" source="4678" target="4263" cy:directed="1"/>
      <edge id="8079" label="P11798 (pp) P35438" source="4676" target="4153" cy:directed="1"/>
      <edge id="8078" label="P11798 (pp) P63101" source="4676" target="4417" cy:directed="1"/>
      <edge id="8077" label="P11798 (pp) Q01097" source="4676" target="4142" cy:directed="1"/>
      <edge id="8076" label="P11798 (pp) P35436" source="4676" target="4158" cy:directed="1"/>
      <edge id="8075" label="P11798 (pp) P28652" source="4676" target="4514" cy:directed="1"/>
      <edge id="8074" label="P11798 (pp) O88935" source="4676" target="4369" cy:directed="1"/>
      <edge id="8073" label="P11798 (pp) Q9WU78" source="4676" target="4584" cy:directed="1"/>
      <edge id="8072" label="Q8K183 (pp) P63330" source="4675" target="4167" cy:directed="1"/>
      <edge id="8071" label="Q99NE5 (pp) Q9EQZ6" source="4674" target="4745" cy:directed="1"/>
      <edge id="8070" label="P57780 (pp) P09103" source="4672" target="4412" cy:directed="1"/>
      <edge id="8069" label="P57780 (pp) P50516" source="4672" target="4231" cy:directed="1"/>
      <edge id="8068" label="Q9QY76 (pp) O35526" source="4671" target="4267" cy:directed="1"/>
      <edge id="8067" label="Q9QY76 (pp) O08788" source="4671" target="4275" cy:directed="1"/>
      <edge id="8066" label="Q9QY76 (pp) P61264" source="4671" target="4405" cy:directed="1"/>
      <edge id="8065" label="Q9R1V6 (pp) Q9JIA1" source="4669" target="4733" cy:directed="1"/>
      <edge id="8064" label="Q9R1V6 (pp) Q01097" source="4669" target="4142" cy:directed="1"/>
      <edge id="8063" label="P48758 (pp) P62259" source="4668" target="4163" cy:directed="1"/>
      <edge id="8062" label="Q91XV3 (pp) P06837" source="4667" target="4445" cy:directed="1"/>
      <edge id="8061" label="Q91XV3 (pp) P60761" source="4667" target="4537" cy:directed="1"/>
      <edge id="8060" label="Q91XV3 (pp) P26645" source="4667" target="4643" cy:directed="1"/>
      <edge id="8059" label="Q91XV3 (pp) P68510" source="4667" target="4151" cy:directed="1"/>
      <edge id="8058" label="P55302 (pp) Q91ZX7" source="4666" target="4461" cy:directed="1"/>
      <edge id="8057" label="O88643 (pp) P60766" source="4664" target="4465" cy:directed="1"/>
      <edge id="8056" label="O88643 (pp) Q68FF6" source="4664" target="4521" cy:directed="1"/>
      <edge id="8055" label="O88643 (pp) Q61735" source="4664" target="4305" cy:directed="1"/>
      <edge id="8054" label="O88643 (pp) P63001" source="4664" target="4336" cy:directed="1"/>
      <edge id="8053" label="Q80TZ3 (pp) P50516" source="4663" target="4231" cy:directed="1"/>
      <edge id="8052" label="Q80TZ3 (pp) O08585" source="4663" target="4545" cy:directed="1"/>
      <edge id="8051" label="Q7TMB8 (pp) Q9JJV2" source="4662" target="4346" cy:directed="1"/>
      <edge id="8050" label="Q7TMB8 (pp) P28660" source="4662" target="4320" cy:directed="1"/>
      <edge id="8049" label="Q9WV55 (pp) Q62442" source="4661" target="4271" cy:directed="1"/>
      <edge id="8048" label="Q9WV55 (pp) Q9QY76" source="4661" target="4671" cy:directed="1"/>
      <edge id="8047" label="Q9WV55 (pp) P60879" source="4661" target="4319" cy:directed="1"/>
      <edge id="8046" label="Q9WV55 (pp) P63044" source="4661" target="4338" cy:directed="1"/>
      <edge id="8045" label="O55131 (pp) P42208" source="4660" target="4645" cy:directed="1"/>
      <edge id="8044" label="O35136 (pp) P11627" source="4659" target="4499" cy:directed="1"/>
      <edge id="8043" label="P12960 (pp) P04925" source="4657" target="4323" cy:directed="1"/>
      <edge id="8042" label="P12960 (pp) P11627" source="4657" target="4499" cy:directed="1"/>
      <edge id="8041" label="P12960 (pp) B9EKR1" source="4657" target="4547" cy:directed="1"/>
      <edge id="8040" label="Q61699 (pp) P68369" source="4656" target="4286" cy:directed="1"/>
      <edge id="8039" label="P08553 (pp) P46660" source="4655" target="4339" cy:directed="1"/>
      <edge id="8038" label="P08553 (pp) P19246" source="4655" target="4596" cy:directed="1"/>
      <edge id="8037" label="Q8K4Z3 (pp) Q9CZ42" source="4654" target="4626" cy:directed="1"/>
      <edge id="8036" label="Q8K4Z3 (pp) Q9Z1P6" source="4654" target="4237" cy:directed="1"/>
      <edge id="8035" label="P08551 (pp) P19246" source="4653" target="4596" cy:directed="1"/>
      <edge id="8034" label="P08551 (pp) P63101" source="4653" target="4417" cy:directed="1"/>
      <edge id="8033" label="Q8VDQ8 (pp) Q9DC69" source="4652" target="4345" cy:directed="1"/>
      <edge id="8032" label="O54983 (pp) Q8VDQ8" source="4651" target="4652" cy:directed="1"/>
      <edge id="8031" label="P18760 (pp) P40124" source="4649" target="4650" cy:directed="1"/>
      <edge id="8030" label="Q9Z2Q6 (pp) O55131" source="4647" target="4660" cy:directed="1"/>
      <edge id="8029" label="Q9Z2Q6 (pp) P42208" source="4647" target="4645" cy:directed="1"/>
      <edge id="8028" label="Q9WV34 (pp) Q01097" source="4646" target="4142" cy:directed="1"/>
      <edge id="8027" label="P28661 (pp) P42208" source="4644" target="4645" cy:directed="1"/>
      <edge id="8026" label="P26645 (pp) P63318" source="4643" target="4604" cy:directed="1"/>
      <edge id="8025" label="P84096 (pp) Q5FWK3" source="4642" target="4428" cy:directed="1"/>
      <edge id="8024" label="O35143 (pp) Q91VR2" source="4641" target="4201" cy:directed="1"/>
      <edge id="8023" label="O35143 (pp) Q9D3D9" source="4641" target="4148" cy:directed="1"/>
      <edge id="8022" label="P63321 (pp) P35438" source="4639" target="4153" cy:directed="1"/>
      <edge id="8021" label="Q8K021 (pp) Q62277" source="4638" target="4292" cy:directed="1"/>
      <edge id="8020" label="Q8CI94 (pp) Q9D0F9" source="4637" target="4573" cy:directed="1"/>
      <edge id="8019" label="Q8CI94 (pp) Q91ZJ5" source="4637" target="4552" cy:directed="1"/>
      <edge id="8018" label="Q8CI94 (pp) P50516" source="4637" target="4231" cy:directed="1"/>
      <edge id="8017" label="P48962 (pp) Q60931" source="4636" target="4494" cy:directed="1"/>
      <edge id="8016" label="P43406 (pp) Q71LX4" source="4634" target="4635" cy:directed="1"/>
      <edge id="8015" label="O35857 (pp) P17156" source="4632" target="4516" cy:directed="1"/>
      <edge id="8014" label="O35857 (pp) P62073" source="4632" target="4293" cy:directed="1"/>
      <edge id="8013" label="O35857 (pp) O35129" source="4632" target="4349" cy:directed="1"/>
      <edge id="8012" label="O35857 (pp) P38647" source="4632" target="4484" cy:directed="1"/>
      <edge id="8011" label="O35857 (pp) Q9D880" source="4632" target="4633" cy:directed="1"/>
      <edge id="8010" label="Q61490 (pp) P01831" source="4627" target="4557" cy:directed="1"/>
      <edge id="8009" label="Q9CZ42 (pp) P61922" source="4626" target="4262" cy:directed="1"/>
      <edge id="8008" label="P35564 (pp) P09103" source="4625" target="4412" cy:directed="1"/>
      <edge id="8007" label="P19096 (pp) Q9DCD0" source="4624" target="4160" cy:directed="1"/>
      <edge id="8006" label="P19096 (pp) Q64521" source="4624" target="4363" cy:directed="1"/>
      <edge id="8005" label="P19096 (pp) Q05920" source="4624" target="4192" cy:directed="1"/>
      <edge id="8004" label="Q61644 (pp) P39053" source="4623" target="4435" cy:directed="1"/>
      <edge id="8003" label="Q61644 (pp) Q8CHC4" source="4623" target="4577" cy:directed="1"/>
      <edge id="8002" label="Q61644 (pp) P10637" source="4623" target="4472" cy:directed="1"/>
      <edge id="8001" label="Q8BZ98 (pp) Q60631" source="4622" target="4291" cy:directed="1"/>
      <edge id="8000" label="Q8BZ98 (pp) Q60598" source="4622" target="4486" cy:directed="1"/>
      <edge id="7999" label="Q8BZ98 (pp) Q61644" source="4622" target="4623" cy:directed="1"/>
      <edge id="7998" label="Q5RJI5 (pp) P62259" source="4621" target="4163" cy:directed="1"/>
      <edge id="7997" label="P61164 (pp) P62259" source="4619" target="4163" cy:directed="1"/>
      <edge id="7996" label="Q8R191 (pp) Q62277" source="4618" target="4292" cy:directed="1"/>
      <edge id="7995" label="Q8R191 (pp) P50516" source="4618" target="4231" cy:directed="1"/>
      <edge id="7994" label="O35643 (pp) O08585" source="4617" target="4545" cy:directed="1"/>
      <edge id="7993" label="O35643 (pp) Q80TZ3" source="4617" target="4663" cy:directed="1"/>
      <edge id="7992" label="O35643 (pp) Q60631" source="4617" target="4291" cy:directed="1"/>
      <edge id="7991" label="Q99P72 (pp) Q9D1T0" source="4616" target="4678" cy:directed="1"/>
      <edge id="7990" label="Q99P72 (pp) P48722" source="4616" target="4640" cy:directed="1"/>
      <edge id="7989" label="Q60930 (pp) P48962" source="4615" target="4636" cy:directed="1"/>
      <edge id="7988" label="Q60930 (pp) Q9WUM5" source="4615" target="4214" cy:directed="1"/>
      <edge id="7987" label="Q60930 (pp) Q01097" source="4615" target="4142" cy:directed="1"/>
      <edge id="7986" label="Q60930 (pp) Q9CR68" source="4615" target="4205" cy:directed="1"/>
      <edge id="7985" label="P20444 (pp) P26645" source="4614" target="4643" cy:directed="1"/>
      <edge id="7984" label="Q9QXS1 (pp) P63101" source="4613" target="4417" cy:directed="1"/>
      <edge id="7983" label="Q9QXS1 (pp) Q64010" source="4613" target="4367" cy:directed="1"/>
      <edge id="7982" label="O08599 (pp) P16546" source="4612" target="4166" cy:directed="1"/>
      <edge id="7981" label="O08599 (pp) P61264" source="4612" target="4405" cy:directed="1"/>
      <edge id="7980" label="Q8BW75 (pp) Q9CZS1" source="4611" target="4350" cy:directed="1"/>
      <edge id="7979" label="Q8BW75 (pp) Q9DBF1" source="4611" target="4420" cy:directed="1"/>
      <edge id="7978" label="O35239 (pp) P46460" source="4610" target="4221" cy:directed="1"/>
      <edge id="7977" label="Q9EPJ9 (pp) P62331" source="4608" target="4256" cy:directed="1"/>
      <edge id="7976" label="P00405 (pp) Q6PB66" source="4607" target="4436" cy:directed="1"/>
      <edge id="7975" label="P00405 (pp) P03930" source="4607" target="4326" cy:directed="1"/>
      <edge id="7974" label="P56564 (pp) P28661" source="4606" target="4644" cy:directed="1"/>
      <edge id="7973" label="P56564 (pp) P63101" source="4606" target="4417" cy:directed="1"/>
      <edge id="7972" label="P63318 (pp) P35438" source="4604" target="4153" cy:directed="1"/>
      <edge id="7971" label="P58281 (pp) Q8K1M6" source="4602" target="4388" cy:directed="1"/>
      <edge id="7970" label="Q8R3V5 (pp) Q8CHC4" source="4601" target="4577" cy:directed="1"/>
      <edge id="7969" label="P67871 (pp) Q60737" source="4600" target="4742" cy:directed="1"/>
      <edge id="7968" label="Q810U3 (pp) Q8C8R3" source="4599" target="4165" cy:directed="1"/>
      <edge id="7967" label="P62743 (pp) O08585" source="4595" target="4545" cy:directed="1"/>
      <edge id="7966" label="Q60605 (pp) Q01097" source="4593" target="4142" cy:directed="1"/>
      <edge id="7965" label="P35279 (pp) Q61598" source="4589" target="4195" cy:directed="1"/>
      <edge id="7964" label="Q9CRB9 (pp) P16054" source="4588" target="4381" cy:directed="1"/>
      <edge id="7963" label="Q9CQI6 (pp) P60710" source="4587" target="4280" cy:directed="1"/>
      <edge id="7962" label="P50396 (pp) P63011" source="4585" target="4485" cy:directed="1"/>
      <edge id="7961" label="P50396 (pp) Q99PT1" source="4585" target="4371" cy:directed="1"/>
      <edge id="7960" label="P50396 (pp) P07901" source="4585" target="4446" cy:directed="1"/>
      <edge id="7959" label="P50396 (pp) P62821" source="4585" target="4586" cy:directed="1"/>
      <edge id="7958" label="Q9WU78 (pp) Q62419" source="4584" target="4550" cy:directed="1"/>
      <edge id="7957" label="Q9WU78 (pp) Q60631" source="4584" target="4291" cy:directed="1"/>
      <edge id="7956" label="Q9WU78 (pp) P05480" source="4584" target="4282" cy:directed="1"/>
      <edge id="7955" label="Q9WU78 (pp) Q62420" source="4584" target="4409" cy:directed="1"/>
      <edge id="7954" label="P0C0A3 (pp) Q9D8B3" source="4583" target="4556" cy:directed="1"/>
      <edge id="7953" label="P0C0A3 (pp) Q9WU78" source="4583" target="4584" cy:directed="1"/>
      <edge id="7952" label="Q9R0P9 (pp) O55042" source="4582" target="4554" cy:directed="1"/>
      <edge id="7951" label="Q9R0P9 (pp) Q99LX0" source="4582" target="4255" cy:directed="1"/>
      <edge id="7950" label="Q9R0P9 (pp) P68369" source="4582" target="4286" cy:directed="1"/>
      <edge id="7949" label="Q80UU9 (pp) P68510" source="4581" target="4151" cy:directed="1"/>
      <edge id="7948" label="Q60875 (pp) P84096" source="4579" target="4642" cy:directed="1"/>
      <edge id="7947" label="Q60875 (pp) Q8BG51" source="4579" target="4335" cy:directed="1"/>
      <edge id="7946" label="Q61411 (pp) P63038" source="4578" target="4185" cy:directed="1"/>
      <edge id="7945" label="Q61411 (pp) P35438" source="4578" target="4153" cy:directed="1"/>
      <edge id="7944" label="Q8CHC4 (pp) P50516" source="4577" target="4231" cy:directed="1"/>
      <edge id="7943" label="Q8CHC4 (pp) Q62420" source="4577" target="4409" cy:directed="1"/>
      <edge id="7942" label="Q91VZ6 (pp) Q68FD5" source="4576" target="4314" cy:directed="1"/>
      <edge id="7941" label="Q9WUB3 (pp) P47857" source="4575" target="4469" cy:directed="1"/>
      <edge id="7940" label="Q9WUB3 (pp) Q9D0F9" source="4575" target="4573" cy:directed="1"/>
      <edge id="7939" label="Q9WUB3 (pp) Q91ZJ5" source="4575" target="4552" cy:directed="1"/>
      <edge id="7938" label="Q9D0F9 (pp) Q91ZJ5" source="4573" target="4552" cy:directed="1"/>
      <edge id="7937" label="Q9D0F9 (pp) P17710" source="4573" target="4260" cy:directed="1"/>
      <edge id="7936" label="Q6PIC6 (pp) P04925" source="4571" target="4323" cy:directed="1"/>
      <edge id="7935" label="Q6PIC6 (pp) Q01097" source="4571" target="4142" cy:directed="1"/>
      <edge id="7934" label="Q80VP1 (pp) Q9Z0R4" source="4570" target="4539" cy:directed="1"/>
      <edge id="7933" label="P68181 (pp) P63101" source="4569" target="4417" cy:directed="1"/>
      <edge id="7932" label="P68181 (pp) P35438" source="4569" target="4153" cy:directed="1"/>
      <edge id="7931" label="P68181 (pp) P12367" source="4569" target="4355" cy:directed="1"/>
      <edge id="7930" label="P28663 (pp) P46460" source="4568" target="4221" cy:directed="1"/>
      <edge id="7929" label="P41216 (pp) Q99JY0" source="4566" target="4322" cy:directed="1"/>
      <edge id="7928" label="Q9D6F9 (pp) P50516" source="4565" target="4231" cy:directed="1"/>
      <edge id="7927" label="Q99MR8 (pp) Q99MN9" source="4563" target="4372" cy:directed="1"/>
      <edge id="7926" label="Q8BH04 (pp) P17182" source="4562" target="4453" cy:directed="1"/>
      <edge id="7925" label="Q8BH04 (pp) Q05920" source="4562" target="4192" cy:directed="1"/>
      <edge id="7924" label="Q8BWF0 (pp) Q05920" source="4561" target="4192" cy:directed="1"/>
      <edge id="7923" label="Q8BWF0 (pp) P61922" source="4561" target="4262" cy:directed="1"/>
      <edge id="7922" label="Q8BWF0 (pp) P70404" source="4561" target="4232" cy:directed="1"/>
      <edge id="7921" label="Q8BWF0 (pp) Q60597" source="4561" target="4449" cy:directed="1"/>
      <edge id="7920" label="Q91WC3 (pp) P50516" source="4560" target="4231" cy:directed="1"/>
      <edge id="7919" label="Q3UVX5 (pp) P35438" source="4559" target="4153" cy:directed="1"/>
      <edge id="7918" label="Q3UVX5 (pp) P62204" source="4559" target="4517" cy:directed="1"/>
      <edge id="7917" label="Q3UVX5 (pp) P04925" source="4559" target="4323" cy:directed="1"/>
      <edge id="7916" label="P20357 (pp) P14873" source="4558" target="4411" cy:directed="1"/>
      <edge id="7915" label="P20357 (pp) P12367" source="4558" target="4355" cy:directed="1"/>
      <edge id="7914" label="P20357 (pp) O88935" source="4558" target="4369" cy:directed="1"/>
      <edge id="7913" label="P20357 (pp) Q9ERD7" source="4558" target="4710" cy:directed="1"/>
      <edge id="7912" label="P20357 (pp) P11798" source="4558" target="4676" cy:directed="1"/>
      <edge id="7911" label="P20357 (pp) Q6PHZ2" source="4558" target="4279" cy:directed="1"/>
      <edge id="7910" label="P20357 (pp) P35438" source="4558" target="4153" cy:directed="1"/>
      <edge id="7909" label="Q9D8B3 (pp) Q9WU78" source="4556" target="4584" cy:directed="1"/>
      <edge id="7908" label="O55042 (pp) O35526" source="4554" target="4267" cy:directed="1"/>
      <edge id="7907" label="P63328 (pp) P63137" source="4553" target="4238" cy:directed="1"/>
      <edge id="7906" label="P63328 (pp) Q63810" source="4553" target="4717" cy:directed="1"/>
      <edge id="7905" label="P63328 (pp) O35465" source="4553" target="4384" cy:directed="1"/>
      <edge id="7904" label="P63328 (pp) P35438" source="4553" target="4153" cy:directed="1"/>
      <edge id="7903" label="P63328 (pp) P22723" source="4553" target="4594" cy:directed="1"/>
      <edge id="7902" label="Q62419 (pp) Q9D8B3" source="4550" target="4556" cy:directed="1"/>
      <edge id="7901" label="Q62419 (pp) P39053" source="4550" target="4435" cy:directed="1"/>
      <edge id="7900" label="Q62419 (pp) Q7TQF7" source="4550" target="4443" cy:directed="1"/>
      <edge id="7899" label="P45376 (pp) P16054" source="4549" target="4381" cy:directed="1"/>
      <edge id="7898" label="O54991 (pp) Q99P72" source="4548" target="4616" cy:directed="1"/>
      <edge id="7897" label="B9EKR1 (pp) O54991" source="4547" target="4548" cy:directed="1"/>
      <edge id="7896" label="Q9QYR6 (pp) Q91VR7" source="4546" target="4685" cy:directed="1"/>
      <edge id="7895" label="O08585 (pp) Q80VP1" source="4545" target="4570" cy:directed="1"/>
      <edge id="7894" label="O08585 (pp) Q91VR2" source="4545" target="4201" cy:directed="1"/>
      <edge id="7893" label="Q60932 (pp) P48962" source="4544" target="4636" cy:directed="1"/>
      <edge id="7892" label="Q60932 (pp) Q01097" source="4544" target="4142" cy:directed="1"/>
      <edge id="7891" label="Q60932 (pp) P16054" source="4544" target="4381" cy:directed="1"/>
      <edge id="7890" label="Q60932 (pp) P17710" source="4544" target="4260" cy:directed="1"/>
      <edge id="7889" label="Q60932 (pp) Q99LX0" source="4544" target="4255" cy:directed="1"/>
      <edge id="7888" label="Q3UHL1 (pp) P60761" source="4543" target="4537" cy:directed="1"/>
      <edge id="7887" label="Q3UHL1 (pp) P63101" source="4543" target="4417" cy:directed="1"/>
      <edge id="7886" label="Q9CPQ1 (pp) P56391" source="4542" target="4269" cy:directed="1"/>
      <edge id="7885" label="Q9CPQ1 (pp) P00405" source="4542" target="4607" cy:directed="1"/>
      <edge id="7884" label="Q9CPQ1 (pp) Q9D855" source="4542" target="4341" cy:directed="1"/>
      <edge id="7883" label="Q9CPQ1 (pp) Q9DB20" source="4542" target="4177" cy:directed="1"/>
      <edge id="7882" label="Q9CPQ1 (pp) Q9CQZ5" source="4542" target="4144" cy:directed="1"/>
      <edge id="7881" label="Q9CPQ1 (pp) P43024" source="4542" target="4410" cy:directed="1"/>
      <edge id="7880" label="Q9CPQ1 (pp) P56379" source="4542" target="4353" cy:directed="1"/>
      <edge id="7879" label="Q9CPQ1 (pp) Q9CQH3" source="4542" target="4178" cy:directed="1"/>
      <edge id="7878" label="Q9CPQ1 (pp) Q9CQQ7" source="4542" target="4347" cy:directed="1"/>
      <edge id="7877" label="Q9CPQ1 (pp) Q9CQZ6" source="4542" target="4169" cy:directed="1"/>
      <edge id="7876" label="Q9CPQ1 (pp) Q9D3D9" source="4542" target="4148" cy:directed="1"/>
      <edge id="7875" label="Q9CPQ1 (pp) Q99LY9" source="4542" target="4190" cy:directed="1"/>
      <edge id="7874" label="Q9CPQ1 (pp) P97450" source="4542" target="4368" cy:directed="1"/>
      <edge id="7873" label="Q9CPQ1 (pp) Q9CQJ8" source="4542" target="4208" cy:directed="1"/>
      <edge id="7872" label="Q9CPQ1 (pp) Q9DB77" source="4542" target="4343" cy:directed="1"/>
      <edge id="7871" label="Q9CPQ1 (pp) P17665" source="4542" target="4493" cy:directed="1"/>
      <edge id="7870" label="Q9CPQ1 (pp) P48771" source="4542" target="4241" cy:directed="1"/>
      <edge id="7869" label="Q9CPQ1 (pp) Q9CPP6" source="4542" target="4219" cy:directed="1"/>
      <edge id="7868" label="Q9CPQ1 (pp) Q9CQ69" source="4542" target="4172" cy:directed="1"/>
      <edge id="7867" label="Q9CPQ1 (pp) Q9DCX2" source="4542" target="4304" cy:directed="1"/>
      <edge id="7866" label="Q9CPQ1 (pp) Q9D6J6" source="4542" target="4145" cy:directed="1"/>
      <edge id="7865" label="Q9CPQ1 (pp) Q03265" source="4542" target="4150" cy:directed="1"/>
      <edge id="7864" label="Q9CPQ1 (pp) P19783" source="4542" target="4183" cy:directed="1"/>
      <edge id="7863" label="Q9CPQ1 (pp) Q06185" source="4542" target="4209" cy:directed="1"/>
      <edge id="7862" label="Q9CPQ1 (pp) Q91VR2" source="4542" target="4201" cy:directed="1"/>
      <edge id="7861" label="Q9CPQ1 (pp) Q9ERS2" source="4542" target="4277" cy:directed="1"/>
      <edge id="7860" label="Q5SQX6 (pp) P28660" source="4541" target="4320" cy:directed="1"/>
      <edge id="7859" label="Q80Y14 (pp) Q99KI0" source="4540" target="4276" cy:directed="1"/>
      <edge id="7858" label="Q80Y14 (pp) Q99KB8" source="4540" target="4723" cy:directed="1"/>
      <edge id="7857" label="Q80Y14 (pp) Q9DCB8" source="4540" target="4480" cy:directed="1"/>
      <edge id="7856" label="Q80Y14 (pp) P99029" source="4540" target="4294" cy:directed="1"/>
      <edge id="7855" label="Q9Z0R4 (pp) P50516" source="4539" target="4231" cy:directed="1"/>
      <edge id="7854" label="Q9Z0R4 (pp) P39053" source="4539" target="4435" cy:directed="1"/>
      <edge id="7853" label="P00493 (pp) P04925" source="4538" target="4323" cy:directed="1"/>
      <edge id="7852" label="P00493 (pp) Q9R0Y5" source="4538" target="4510" cy:directed="1"/>
      <edge id="7851" label="P00493 (pp) P06151" source="4538" target="4176" cy:directed="1"/>
      <edge id="7850" label="P00493 (pp) P17742" source="4538" target="4197" cy:directed="1"/>
      <edge id="7849" label="P00493 (pp) P52480" source="4538" target="4393" cy:directed="1"/>
      <edge id="7848" label="P00493 (pp) Q9R111" source="4538" target="4572" cy:directed="1"/>
      <edge id="7847" label="P00493 (pp) Q99LC5" source="4538" target="4253" cy:directed="1"/>
      <edge id="7846" label="P60761 (pp) P06837" source="4537" target="4445" cy:directed="1"/>
      <edge id="7845" label="Q64332 (pp) P46460" source="4536" target="4221" cy:directed="1"/>
      <edge id="7844" label="Q64332 (pp) Q9JJV2" source="4536" target="4346" cy:directed="1"/>
      <edge id="7843" label="Q64332 (pp) P62259" source="4536" target="4163" cy:directed="1"/>
      <edge id="7842" label="Q64332 (pp) P60761" source="4536" target="4537" cy:directed="1"/>
      <edge id="7841" label="O70318 (pp) O70589" source="4535" target="4502" cy:directed="1"/>
      <edge id="7840" label="O70318 (pp) P63001" source="4535" target="4336" cy:directed="1"/>
      <edge id="7839" label="O08539 (pp) Q8BZ98" source="4534" target="4622" cy:directed="1"/>
      <edge id="7838" label="O08539 (pp) Q8R3V5" source="4534" target="4601" cy:directed="1"/>
      <edge id="7837" label="O08539 (pp) P10637" source="4534" target="4472" cy:directed="1"/>
      <edge id="7836" label="Q9CS84 (pp) O70589" source="4533" target="4502" cy:directed="1"/>
      <edge id="7835" label="Q9CS84 (pp) O88952" source="4533" target="4182" cy:directed="1"/>
      <edge id="7834" label="Q9CS84 (pp) Q8BYM5" source="4533" target="4530" cy:directed="1"/>
      <edge id="7833" label="Q9JIS5 (pp) Q68FF6" source="4531" target="4521" cy:directed="1"/>
      <edge id="7832" label="Q4ACU6 (pp) Q60631" source="4529" target="4291" cy:directed="1"/>
      <edge id="7831" label="Q4ACU6 (pp) Q8BYM5" source="4529" target="4530" cy:directed="1"/>
      <edge id="7830" label="P48453 (pp) P63328" source="4528" target="4553" cy:directed="1"/>
      <edge id="7829" label="P48453 (pp) P62204" source="4528" target="4517" cy:directed="1"/>
      <edge id="7828" label="P48453 (pp) P63101" source="4528" target="4417" cy:directed="1"/>
      <edge id="7827" label="Q925I1 (pp) O35658" source="4527" target="4302" cy:directed="1"/>
      <edge id="7826" label="Q62261 (pp) P13595" source="4526" target="4500" cy:directed="1"/>
      <edge id="7825" label="Q62261 (pp) Q810U4" source="4526" target="4729" cy:directed="1"/>
      <edge id="7824" label="Q62261 (pp) P16546" source="4526" target="4166" cy:directed="1"/>
      <edge id="7823" label="Q62261 (pp) Q01097" source="4526" target="4142" cy:directed="1"/>
      <edge id="7822" label="Q62261 (pp) P35438" source="4526" target="4153" cy:directed="1"/>
      <edge id="7821" label="Q62261 (pp) P63101" source="4526" target="4417" cy:directed="1"/>
      <edge id="7820" label="Q9R0N7 (pp) Q9Z0P4" source="4525" target="4720" cy:directed="1"/>
      <edge id="7819" label="Q9R0N7 (pp) P60879" source="4525" target="4319" cy:directed="1"/>
      <edge id="7818" label="P30999 (pp) Q60598" source="4522" target="4486" cy:directed="1"/>
      <edge id="7817" label="P30999 (pp) P35438" source="4522" target="4153" cy:directed="1"/>
      <edge id="7816" label="P30999 (pp) Q02248" source="4522" target="4281" cy:directed="1"/>
      <edge id="7815" label="Q68FF6 (pp) P62204" source="4521" target="4517" cy:directed="1"/>
      <edge id="7814" label="Q68FF6 (pp) B9EKR1" source="4521" target="4547" cy:directed="1"/>
      <edge id="7813" label="Q68FF6 (pp) P63101" source="4521" target="4417" cy:directed="1"/>
      <edge id="7812" label="P23818 (pp) P23819" source="4520" target="4157" cy:directed="1"/>
      <edge id="7811" label="P23818 (pp) Q3UVX5" source="4520" target="4559" cy:directed="1"/>
      <edge id="7810" label="P23818 (pp) P35438" source="4520" target="4153" cy:directed="1"/>
      <edge id="7809" label="P23818 (pp) P35436" source="4520" target="4158" cy:directed="1"/>
      <edge id="7808" label="Q9DBJ1 (pp) P52480" source="4519" target="4393" cy:directed="1"/>
      <edge id="7807" label="Q9DBJ1 (pp) P17182" source="4519" target="4453" cy:directed="1"/>
      <edge id="7806" label="Q9DBJ1 (pp) P17751" source="4519" target="4235" cy:directed="1"/>
      <edge id="7805" label="Q9DBJ1 (pp) Q99K85" source="4519" target="4515" cy:directed="1"/>
      <edge id="7804" label="Q9DBJ1 (pp) P06745" source="4519" target="4402" cy:directed="1"/>
      <edge id="7803" label="Q9DBJ1 (pp) P09411" source="4519" target="4236" cy:directed="1"/>
      <edge id="7802" label="Q9DBJ1 (pp) Q93092" source="4519" target="4392" cy:directed="1"/>
      <edge id="7801" label="P68254 (pp) P10637" source="4518" target="4472" cy:directed="1"/>
      <edge id="7800" label="P62204 (pp) P63101" source="4517" target="4417" cy:directed="1"/>
      <edge id="7799" label="P62204 (pp) O70589" source="4517" target="4502" cy:directed="1"/>
      <edge id="7798" label="P62204 (pp) P63328" source="4517" target="4553" cy:directed="1"/>
      <edge id="7797" label="P62204 (pp) P35438" source="4517" target="4153" cy:directed="1"/>
      <edge id="7796" label="Q99K85 (pp) O88712" source="4515" target="4479" cy:directed="1"/>
      <edge id="7795" label="Q99K85 (pp) Q91Z53" source="4515" target="4273" cy:directed="1"/>
      <edge id="7794" label="P28652 (pp) Q01097" source="4514" target="4142" cy:directed="1"/>
      <edge id="7793" label="P28652 (pp) Q6PHZ2" source="4514" target="4279" cy:directed="1"/>
      <edge id="7792" label="P28652 (pp) P35436" source="4514" target="4158" cy:directed="1"/>
      <edge id="7791" label="P28652 (pp) P23819" source="4514" target="4157" cy:directed="1"/>
      <edge id="7790" label="Q6PIE5 (pp) P70414" source="4512" target="4513" cy:directed="1"/>
      <edge id="7789" label="P47802 (pp) O88441" source="4511" target="4233" cy:directed="1"/>
      <edge id="7788" label="Q9R0Y5 (pp) Q9DCD0" source="4510" target="4160" cy:directed="1"/>
      <edge id="7787" label="Q9QXJ1 (pp) P12023" source="4508" target="4263" cy:directed="1"/>
      <edge id="7786" label="Q9QXJ1 (pp) P04925" source="4508" target="4323" cy:directed="1"/>
      <edge id="7785" label="P84091 (pp) Q9DBG3" source="4507" target="4474" cy:directed="1"/>
      <edge id="7784" label="P84091 (pp) Q6IRU5" source="4507" target="4475" cy:directed="1"/>
      <edge id="7783" label="P84091 (pp) P62743" source="4507" target="4595" cy:directed="1"/>
      <edge id="7782" label="P84091 (pp) Q80VP1" source="4507" target="4570" cy:directed="1"/>
      <edge id="7781" label="P84091 (pp) O08585" source="4507" target="4545" cy:directed="1"/>
      <edge id="7780" label="P84091 (pp) Q68FD5" source="4507" target="4314" cy:directed="1"/>
      <edge id="7779" label="P84091 (pp) P50516" source="4507" target="4231" cy:directed="1"/>
      <edge id="7778" label="P84091 (pp) P17426" source="4507" target="4229" cy:directed="1"/>
      <edge id="7777" label="P99024 (pp) P60879" source="4505" target="4319" cy:directed="1"/>
      <edge id="7776" label="P99024 (pp) Q6PER3" source="4505" target="4245" cy:directed="1"/>
      <edge id="7775" label="P99024 (pp) O70589" source="4505" target="4502" cy:directed="1"/>
      <edge id="7774" label="P03995 (pp) P63101" source="4504" target="4417" cy:directed="1"/>
      <edge id="7773" label="P03995 (pp) Q9QXS1" source="4504" target="4613" cy:directed="1"/>
      <edge id="7772" label="O70589 (pp) O88935" source="4502" target="4369" cy:directed="1"/>
      <edge id="7771" label="O70589 (pp) O08599" source="4502" target="4612" cy:directed="1"/>
      <edge id="7770" label="O70589 (pp) P60469" source="4502" target="4551" cy:directed="1"/>
      <edge id="7769" label="O70589 (pp) P16330" source="4502" target="4503" cy:directed="1"/>
      <edge id="7768" label="Q8BKX1 (pp) P28660" source="4501" target="4320" cy:directed="1"/>
      <edge id="7767" label="Q8BKX1 (pp) P62259" source="4501" target="4163" cy:directed="1"/>
      <edge id="7766" label="P13595 (pp) P16546" source="4500" target="4166" cy:directed="1"/>
      <edge id="7765" label="P13595 (pp) P04925" source="4500" target="4323" cy:directed="1"/>
      <edge id="7764" label="P13595 (pp) Q9CQV8" source="4500" target="4295" cy:directed="1"/>
      <edge id="7763" label="P11627 (pp) P13595" source="4499" target="4500" cy:directed="1"/>
      <edge id="7762" label="P62746 (pp) P63330" source="4498" target="4167" cy:directed="1"/>
      <edge id="7761" label="P62746 (pp) Q5FWK3" source="4498" target="4428" cy:directed="1"/>
      <edge id="7760" label="P62746 (pp) Q8BG51" source="4498" target="4335" cy:directed="1"/>
      <edge id="7759" label="Q8VD37 (pp) P17426" source="4496" target="4229" cy:directed="1"/>
      <edge id="7758" label="Q8VD37 (pp) P35564" source="4496" target="4625" cy:directed="1"/>
      <edge id="7757" label="Q8VD37 (pp) Q62420" source="4496" target="4409" cy:directed="1"/>
      <edge id="7756" label="Q8QZT1 (pp) Q99LC5" source="4495" target="4253" cy:directed="1"/>
      <edge id="7755" label="Q8QZT1 (pp) Q8BMF4" source="4495" target="4191" cy:directed="1"/>
      <edge id="7754" label="Q8QZT1 (pp) Q8BWT1" source="4495" target="4249" cy:directed="1"/>
      <edge id="7753" label="Q8QZT1 (pp) Q9DBL1" source="4495" target="4389" cy:directed="1"/>
      <edge id="7752" label="Q8QZT1 (pp) Q9D0K2" source="4495" target="4215" cy:directed="1"/>
      <edge id="7751" label="Q8QZT1 (pp) O08756" source="4495" target="4321" cy:directed="1"/>
      <edge id="7750" label="Q8QZT1 (pp) Q99JY0" source="4495" target="4322" cy:directed="1"/>
      <edge id="7749" label="Q8QZT1 (pp) Q9WUM5" source="4495" target="4214" cy:directed="1"/>
      <edge id="7748" label="Q8QZT1 (pp) Q9D2G2" source="4495" target="4225" cy:directed="1"/>
      <edge id="7747" label="Q8QZT1 (pp) Q8BMS1" source="4495" target="4454" cy:directed="1"/>
      <edge id="7746" label="Q60931 (pp) Q9CQH3" source="4494" target="4178" cy:directed="1"/>
      <edge id="7745" label="Q60931 (pp) Q9D6J6" source="4494" target="4145" cy:directed="1"/>
      <edge id="7744" label="Q9JLZ3 (pp) Q99MR8" source="4492" target="4563" cy:directed="1"/>
      <edge id="7743" label="Q9JLZ3 (pp) Q8BH95" source="4492" target="4186" cy:directed="1"/>
      <edge id="7742" label="Q9JLZ3 (pp) Q9JLJ2" source="4492" target="4200" cy:directed="1"/>
      <edge id="7741" label="Q9JLZ3 (pp) Q61425" source="4492" target="4252" cy:directed="1"/>
      <edge id="7740" label="Q9JLZ3 (pp) Q3ULD5" source="4492" target="4288" cy:directed="1"/>
      <edge id="7739" label="Q8VDP6 (pp) O55023" source="4489" target="4580" cy:directed="1"/>
      <edge id="7738" label="Q8VDP6 (pp) P63082" source="4489" target="4386" cy:directed="1"/>
      <edge id="7737" label="Q8VDP6 (pp) Q9Z1B3" source="4489" target="4247" cy:directed="1"/>
      <edge id="7736" label="Q8VDP6 (pp) Q99L43" source="4489" target="4490" cy:directed="1"/>
      <edge id="7735" label="Q9Z0X1 (pp) P17742" source="4488" target="4197" cy:directed="1"/>
      <edge id="7734" label="Q9Z0X1 (pp) Q8K1M6" source="4488" target="4388" cy:directed="1"/>
      <edge id="7733" label="Q60598 (pp) Q9JM76" source="4486" target="4316" cy:directed="1"/>
      <edge id="7732" label="Q60598 (pp) Q5FWK3" source="4486" target="4428" cy:directed="1"/>
      <edge id="7731" label="Q60598 (pp) P23819" source="4486" target="4157" cy:directed="1"/>
      <edge id="7730" label="Q60598 (pp) P59999" source="4486" target="4430" cy:directed="1"/>
      <edge id="7729" label="Q60598 (pp) P63085" source="4486" target="4193" cy:directed="1"/>
      <edge id="7728" label="Q60598 (pp) Q01097" source="4486" target="4142" cy:directed="1"/>
      <edge id="7727" label="Q60598 (pp) P35438" source="4486" target="4153" cy:directed="1"/>
      <edge id="7726" label="Q60598 (pp) Q9CVB6" source="4486" target="4431" cy:directed="1"/>
      <edge id="7725" label="Q60598 (pp) Q80Z38" source="4486" target="4143" cy:directed="1"/>
      <edge id="7724" label="Q60598 (pp) P05480" source="4486" target="4282" cy:directed="1"/>
      <edge id="7723" label="Q60598 (pp) P61161" source="4486" target="4487" cy:directed="1"/>
      <edge id="7722" label="P63011 (pp) P47708" source="4485" target="4592" cy:directed="1"/>
      <edge id="7721" label="P63011 (pp) P35438" source="4485" target="4153" cy:directed="1"/>
      <edge id="7720" label="P63011 (pp) Q99NE5" source="4485" target="4674" cy:directed="1"/>
      <edge id="7719" label="P38647 (pp) Q60864" source="4484" target="4312" cy:directed="1"/>
      <edge id="7718" label="P38647 (pp) Q8JZQ2" source="4484" target="4331" cy:directed="1"/>
      <edge id="7717" label="P38647 (pp) P63038" source="4484" target="4185" cy:directed="1"/>
      <edge id="7716" label="P38647 (pp) Q9QYJ0" source="4484" target="4313" cy:directed="1"/>
      <edge id="7715" label="P38647 (pp) P63101" source="4484" target="4417" cy:directed="1"/>
      <edge id="7714" label="Q62425 (pp) Q9CQH3" source="4483" target="4178" cy:directed="1"/>
      <edge id="7713" label="Q62425 (pp) Q99LX0" source="4483" target="4255" cy:directed="1"/>
      <edge id="7712" label="Q62425 (pp) Q9CQ69" source="4483" target="4172" cy:directed="1"/>
      <edge id="7711" label="Q62425 (pp) P68510" source="4483" target="4151" cy:directed="1"/>
      <edge id="7710" label="Q62425 (pp) Q3UIU2" source="4483" target="4226" cy:directed="1"/>
      <edge id="7709" label="Q62425 (pp) P16054" source="4483" target="4381" cy:directed="1"/>
      <edge id="7708" label="Q62425 (pp) O09111" source="4483" target="4149" cy:directed="1"/>
      <edge id="7707" label="Q62425 (pp) Q9Z1P6" source="4483" target="4237" cy:directed="1"/>
      <edge id="7706" label="Q62425 (pp) Q9DCJ5" source="4483" target="4318" cy:directed="1"/>
      <edge id="7705" label="Q62425 (pp) Q9CQ54" source="4483" target="4170" cy:directed="1"/>
      <edge id="7704" label="Q62425 (pp) Q9DCS9" source="4483" target="4204" cy:directed="1"/>
      <edge id="7703" label="Q8BMF3 (pp) Q05920" source="4482" target="4192" cy:directed="1"/>
      <edge id="7702" label="Q8BMF3 (pp) P52480" source="4482" target="4393" cy:directed="1"/>
      <edge id="7701" label="Q8BMF3 (pp) P06151" source="4482" target="4176" cy:directed="1"/>
      <edge id="7700" label="Q9DCB8 (pp) Q9D6J6" source="4480" target="4145" cy:directed="1"/>
      <edge id="7699" label="Q9DCB8 (pp) Q99KI0" source="4480" target="4276" cy:directed="1"/>
      <edge id="7698" label="Q9DCB8 (pp) Q9Z1J3" source="4480" target="4481" cy:directed="1"/>
      <edge id="7697" label="O88712 (pp) Q62420" source="4479" target="4409" cy:directed="1"/>
      <edge id="7696" label="Q8BHL5 (pp) Q60631" source="4478" target="4291" cy:directed="1"/>
      <edge id="7695" label="Q9QXS6 (pp) P62259" source="4477" target="4163" cy:directed="1"/>
      <edge id="7694" label="P17183 (pp) P06745" source="4476" target="4402" cy:directed="1"/>
      <edge id="7693" label="P17183 (pp) P56480" source="4476" target="4196" cy:directed="1"/>
      <edge id="7692" label="P17183 (pp) Q93092" source="4476" target="4392" cy:directed="1"/>
      <edge id="7691" label="P17183 (pp) P52480" source="4476" target="4393" cy:directed="1"/>
      <edge id="7690" label="P17183 (pp) P09411" source="4476" target="4236" cy:directed="1"/>
      <edge id="7689" label="P17183 (pp) Q8BH04" source="4476" target="4562" cy:directed="1"/>
      <edge id="7688" label="P17183 (pp) P17751" source="4476" target="4235" cy:directed="1"/>
      <edge id="7687" label="P17183 (pp) P05063" source="4476" target="4450" cy:directed="1"/>
      <edge id="7686" label="P17183 (pp) Q9DBJ1" source="4476" target="4519" cy:directed="1"/>
      <edge id="7685" label="P17183 (pp) P05064" source="4476" target="4259" cy:directed="1"/>
      <edge id="7684" label="P17183 (pp) P40142" source="4476" target="4297" cy:directed="1"/>
      <edge id="7683" label="Q6IRU5 (pp) Q61548" source="4475" target="4356" cy:directed="1"/>
      <edge id="7682" label="Q6IRU5 (pp) P17426" source="4475" target="4229" cy:directed="1"/>
      <edge id="7681" label="Q6IRU5 (pp) P62743" source="4475" target="4595" cy:directed="1"/>
      <edge id="7680" label="Q9DBG3 (pp) Q80VP1" source="4474" target="4570" cy:directed="1"/>
      <edge id="7679" label="Q9DBG3 (pp) P60879" source="4474" target="4319" cy:directed="1"/>
      <edge id="7678" label="Q9DBG3 (pp) P62743" source="4474" target="4595" cy:directed="1"/>
      <edge id="7677" label="Q9DBG3 (pp) P63101" source="4474" target="4417" cy:directed="1"/>
      <edge id="7676" label="Q9DBG3 (pp) P17426" source="4474" target="4229" cy:directed="1"/>
      <edge id="7675" label="Q9DBG3 (pp) Q68FD5" source="4474" target="4314" cy:directed="1"/>
      <edge id="7674" label="Q9DBG3 (pp) O70161" source="4474" target="4246" cy:directed="1"/>
      <edge id="7673" label="Q9DBG3 (pp) O08585" source="4474" target="4545" cy:directed="1"/>
      <edge id="7672" label="Q9DBG3 (pp) Q6IRU5" source="4474" target="4475" cy:directed="1"/>
      <edge id="7671" label="P10637 (pp) Q99LX0" source="4472" target="4255" cy:directed="1"/>
      <edge id="7670" label="P10637 (pp) Q9D8Y0" source="4472" target="4721" cy:directed="1"/>
      <edge id="7669" label="P10637 (pp) Q9QXJ1" source="4472" target="4508" cy:directed="1"/>
      <edge id="7668" label="P10637 (pp) O55042" source="4472" target="4554" cy:directed="1"/>
      <edge id="7667" label="P10637 (pp) P04925" source="4472" target="4323" cy:directed="1"/>
      <edge id="7666" label="P10637 (pp) P12023" source="4472" target="4263" cy:directed="1"/>
      <edge id="7665" label="Q922R8 (pp) P12023" source="4471" target="4263" cy:directed="1"/>
      <edge id="7664" label="P47857 (pp) Q9R0Y5" source="4469" target="4510" cy:directed="1"/>
      <edge id="7663" label="P47857 (pp) P05063" source="4469" target="4450" cy:directed="1"/>
      <edge id="7662" label="P47857 (pp) P05064" source="4469" target="4259" cy:directed="1"/>
      <edge id="7661" label="P47857 (pp) P63101" source="4469" target="4417" cy:directed="1"/>
      <edge id="7660" label="Q62048 (pp) P63085" source="4467" target="4193" cy:directed="1"/>
      <edge id="7659" label="Q99104 (pp) P35438" source="4466" target="4153" cy:directed="1"/>
      <edge id="7658" label="Q99104 (pp) P63101" source="4466" target="4417" cy:directed="1"/>
      <edge id="7657" label="Q99104 (pp) P08551" source="4466" target="4653" cy:directed="1"/>
      <edge id="7656" label="Q99104 (pp) P03995" source="4466" target="4504" cy:directed="1"/>
      <edge id="7655" label="Q99104 (pp) Q01097" source="4466" target="4142" cy:directed="1"/>
      <edge id="7654" label="P60766 (pp) Q8BG51" source="4465" target="4335" cy:directed="1"/>
      <edge id="7653" label="P60766 (pp) Q5FWK3" source="4465" target="4428" cy:directed="1"/>
      <edge id="7652" label="P60766 (pp) Q99PT1" source="4465" target="4371" cy:directed="1"/>
      <edge id="7651" label="P60766 (pp) P63005" source="4465" target="4244" cy:directed="1"/>
      <edge id="7650" label="Q6R891 (pp) P63101" source="4464" target="4417" cy:directed="1"/>
      <edge id="7649" label="Q6R891 (pp) Q60875" source="4464" target="4579" cy:directed="1"/>
      <edge id="7648" label="Q6R891 (pp) Q62277" source="4464" target="4292" cy:directed="1"/>
      <edge id="7647" label="P62835 (pp) P35438" source="4463" target="4153" cy:directed="1"/>
      <edge id="7646" label="Q8BLK3 (pp) P04925" source="4462" target="4323" cy:directed="1"/>
      <edge id="7645" label="Q91ZX7 (pp) Q9D6K5" source="4461" target="4724" cy:directed="1"/>
      <edge id="7644" label="Q91ZX7 (pp) P12023" source="4461" target="4263" cy:directed="1"/>
      <edge id="7643" label="P08226 (pp) P20357" source="4460" target="4558" cy:directed="1"/>
      <edge id="7642" label="P08226 (pp) P10637" source="4460" target="4472" cy:directed="1"/>
      <edge id="7641" label="P08226 (pp) P12023" source="4460" target="4263" cy:directed="1"/>
      <edge id="7640" label="P08226 (pp) P04925" source="4460" target="4323" cy:directed="1"/>
      <edge id="7639" label="P08226 (pp) Q91ZX7" source="4460" target="4461" cy:directed="1"/>
      <edge id="7638" label="Q8R0S4 (pp) Q9D6F9" source="4459" target="4565" cy:directed="1"/>
      <edge id="7637" label="Q61290 (pp) Q8R0S4" source="4458" target="4459" cy:directed="1"/>
      <edge id="7636" label="P42125 (pp) Q99JY0" source="4457" target="4322" cy:directed="1"/>
      <edge id="7635" label="P42125 (pp) Q8K1Z0" source="4457" target="4257" cy:directed="1"/>
      <edge id="7634" label="P42125 (pp) Q8BH95" source="4457" target="4186" cy:directed="1"/>
      <edge id="7633" label="P42125 (pp) Q91YT0" source="4457" target="4317" cy:directed="1"/>
      <edge id="7632" label="P42125 (pp) Q9CQ62" source="4457" target="4223" cy:directed="1"/>
      <edge id="7631" label="P42125 (pp) O08756" source="4457" target="4321" cy:directed="1"/>
      <edge id="7630" label="P42125 (pp) Q9DCJ5" source="4457" target="4318" cy:directed="1"/>
      <edge id="7629" label="P42125 (pp) Q99LC5" source="4457" target="4253" cy:directed="1"/>
      <edge id="7628" label="P42125 (pp) P51174" source="4457" target="4330" cy:directed="1"/>
      <edge id="7627" label="P42125 (pp) Q61425" source="4457" target="4252" cy:directed="1"/>
      <edge id="7626" label="P42125 (pp) O09111" source="4457" target="4149" cy:directed="1"/>
      <edge id="7625" label="P42125 (pp) Q8BMS1" source="4457" target="4454" cy:directed="1"/>
      <edge id="7624" label="P42125 (pp) Q9JHI5" source="4457" target="4391" cy:directed="1"/>
      <edge id="7623" label="P42125 (pp) Q9Z1P6" source="4457" target="4237" cy:directed="1"/>
      <edge id="7622" label="Q8BGD5 (pp) P50544" source="4456" target="4397" cy:directed="1"/>
      <edge id="7621" label="Q9Z268 (pp) Q06335" source="4455" target="4156" cy:directed="1"/>
      <edge id="7620" label="P17182 (pp) Q9DCD0" source="4453" target="4160" cy:directed="1"/>
      <edge id="7619" label="P17182 (pp) Q9WUA3" source="4453" target="4448" cy:directed="1"/>
      <edge id="7618" label="P17182 (pp) P63101" source="4453" target="4417" cy:directed="1"/>
      <edge id="7617" label="Q9CPW4 (pp) Q9JM76" source="4452" target="4316" cy:directed="1"/>
      <edge id="7616" label="Q9CPW4 (pp) P59999" source="4452" target="4430" cy:directed="1"/>
      <edge id="7615" label="Q8BKZ9 (pp) P97807" source="4451" target="4278" cy:directed="1"/>
      <edge id="7614" label="Q8BKZ9 (pp) Q60597" source="4451" target="4449" cy:directed="1"/>
      <edge id="7613" label="Q8BKZ9 (pp) Q9D051" source="4451" target="4147" cy:directed="1"/>
      <edge id="7612" label="Q8BKZ9 (pp) Q922H2" source="4451" target="4629" cy:directed="1"/>
      <edge id="7611" label="Q8BKZ9 (pp) P35486" source="4451" target="4377" cy:directed="1"/>
      <edge id="7610" label="Q8BKZ9 (pp) Q8BMF4" source="4451" target="4191" cy:directed="1"/>
      <edge id="7609" label="P05063 (pp) P17182" source="4450" target="4453" cy:directed="1"/>
      <edge id="7608" label="P05063 (pp) Q91VR2" source="4450" target="4201" cy:directed="1"/>
      <edge id="7607" label="P05063 (pp) P17710" source="4450" target="4260" cy:directed="1"/>
      <edge id="7606" label="P05063 (pp) Q9WUA3" source="4450" target="4448" cy:directed="1"/>
      <edge id="7605" label="Q9WUA3 (pp) P63101" source="4448" target="4417" cy:directed="1"/>
      <edge id="7604" label="P61982 (pp) P35438" source="4447" target="4153" cy:directed="1"/>
      <edge id="7603" label="P61982 (pp) P10637" source="4447" target="4472" cy:directed="1"/>
      <edge id="7602" label="P61982 (pp) Q9DC28" source="4447" target="4590" cy:directed="1"/>
      <edge id="7601" label="P61982 (pp) P62259" source="4447" target="4163" cy:directed="1"/>
      <edge id="7600" label="P61982 (pp) P63101" source="4447" target="4417" cy:directed="1"/>
      <edge id="7599" label="P07901 (pp) Q61699" source="4446" target="4656" cy:directed="1"/>
      <edge id="7598" label="P07901 (pp) Q60864" source="4446" target="4312" cy:directed="1"/>
      <edge id="7597" label="P07901 (pp) Q9DC28" source="4446" target="4590" cy:directed="1"/>
      <edge id="7596" label="P07901 (pp) Q99KJ8" source="4446" target="4274" cy:directed="1"/>
      <edge id="7595" label="P07901 (pp) P63038" source="4446" target="4185" cy:directed="1"/>
      <edge id="7594" label="P07901 (pp) Q9CR16" source="4446" target="4673" cy:directed="1"/>
      <edge id="7593" label="P07901 (pp) P62259" source="4446" target="4163" cy:directed="1"/>
      <edge id="7592" label="P07901 (pp) P63037" source="4446" target="4217" cy:directed="1"/>
      <edge id="7591" label="P07901 (pp) P11499" source="4446" target="4258" cy:directed="1"/>
      <edge id="7590" label="P07901 (pp) P61982" source="4446" target="4447" cy:directed="1"/>
      <edge id="7589" label="P06837 (pp) P62204" source="4445" target="4517" cy:directed="1"/>
      <edge id="7588" label="P15116 (pp) P30999" source="4444" target="4522" cy:directed="1"/>
      <edge id="7587" label="P15116 (pp) P23242" source="4444" target="4670" cy:directed="1"/>
      <edge id="7586" label="P15116 (pp) P35438" source="4444" target="4153" cy:directed="1"/>
      <edge id="7585" label="P15116 (pp) Q02248" source="4444" target="4281" cy:directed="1"/>
      <edge id="7584" label="Q7TQF7 (pp) Q62420" source="4443" target="4409" cy:directed="1"/>
      <edge id="7583" label="Q7TQF7 (pp) Q8BZ98" source="4443" target="4622" cy:directed="1"/>
      <edge id="7582" label="Q7TQF7 (pp) Q9DBG3" source="4443" target="4474" cy:directed="1"/>
      <edge id="7581" label="Q7TQF7 (pp) P39053" source="4443" target="4435" cy:directed="1"/>
      <edge id="7580" label="Q7TQF7 (pp) Q8CHC4" source="4443" target="4577" cy:directed="1"/>
      <edge id="7579" label="Q7TQF7 (pp) Q9EP69" source="4443" target="4408" cy:directed="1"/>
      <edge id="7578" label="Q7TQF7 (pp) Q68FD5" source="4443" target="4314" cy:directed="1"/>
      <edge id="7577" label="Q7TQF7 (pp) P17427" source="4443" target="4228" cy:directed="1"/>
      <edge id="7576" label="Q99L47 (pp) P63038" source="4442" target="4185" cy:directed="1"/>
      <edge id="7575" label="P29758 (pp) P15105" source="4441" target="4220" cy:directed="1"/>
      <edge id="7574" label="P29758 (pp) P12023" source="4441" target="4263" cy:directed="1"/>
      <edge id="7573" label="Q8CHT0 (pp) P15105" source="4440" target="4220" cy:directed="1"/>
      <edge id="7572" label="Q8CHT0 (pp) Q9DBF1" source="4440" target="4420" cy:directed="1"/>
      <edge id="7571" label="Q8CHT0 (pp) P29758" source="4440" target="4441" cy:directed="1"/>
      <edge id="7570" label="P97772 (pp) P35438" source="4439" target="4153" cy:directed="1"/>
      <edge id="7569" label="P97772 (pp) Q3UHD9" source="4439" target="4179" cy:directed="1"/>
      <edge id="7568" label="P31324 (pp) P68181" source="4437" target="4569" cy:directed="1"/>
      <edge id="7567" label="P31324 (pp) P35438" source="4437" target="4153" cy:directed="1"/>
      <edge id="7566" label="P31324 (pp) P63101" source="4437" target="4417" cy:directed="1"/>
      <edge id="7565" label="P31324 (pp) P20357" source="4437" target="4558" cy:directed="1"/>
      <edge id="7564" label="P31324 (pp) P12367" source="4437" target="4355" cy:directed="1"/>
      <edge id="7563" label="P31324 (pp) Q8BR92" source="4437" target="4438" cy:directed="1"/>
      <edge id="7562" label="Q6PB66 (pp) P68510" source="4436" target="4151" cy:directed="1"/>
      <edge id="7561" label="P39053 (pp) Q8CHC4" source="4435" target="4577" cy:directed="1"/>
      <edge id="7560" label="P39053 (pp) Q9CQ92" source="4435" target="4387" cy:directed="1"/>
      <edge id="7559" label="P39053 (pp) O08539" source="4435" target="4534" cy:directed="1"/>
      <edge id="7558" label="P39053 (pp) P35438" source="4435" target="4153" cy:directed="1"/>
      <edge id="7557" label="P39053 (pp) P28740" source="4435" target="4630" cy:directed="1"/>
      <edge id="7556" label="P39053 (pp) P17426" source="4435" target="4229" cy:directed="1"/>
      <edge id="7555" label="P39053 (pp) Q68FD5" source="4435" target="4314" cy:directed="1"/>
      <edge id="7554" label="P39053 (pp) P04925" source="4435" target="4323" cy:directed="1"/>
      <edge id="7553" label="Q6PH08 (pp) Q99NE5" source="4434" target="4674" cy:directed="1"/>
      <edge id="7552" label="Q6PH08 (pp) P62259" source="4434" target="4163" cy:directed="1"/>
      <edge id="7551" label="O88737 (pp) Q99NE5" source="4433" target="4674" cy:directed="1"/>
      <edge id="7550" label="O88737 (pp) Q6PH08" source="4433" target="4434" cy:directed="1"/>
      <edge id="7549" label="Q9CQC7 (pp) Q9D6J6" source="4432" target="4145" cy:directed="1"/>
      <edge id="7548" label="Q9CQC7 (pp) Q9CQQ7" source="4432" target="4347" cy:directed="1"/>
      <edge id="7547" label="Q9CQC7 (pp) Q91YT0" source="4432" target="4317" cy:directed="1"/>
      <edge id="7546" label="Q9CQC7 (pp) Q9DCS9" source="4432" target="4204" cy:directed="1"/>
      <edge id="7545" label="Q9CQC7 (pp) Q3UIU2" source="4432" target="4226" cy:directed="1"/>
      <edge id="7544" label="Q9CQC7 (pp) Q99LC3" source="4432" target="4189" cy:directed="1"/>
      <edge id="7543" label="Q9CQC7 (pp) Q62425" source="4432" target="4483" cy:directed="1"/>
      <edge id="7542" label="Q9CQC7 (pp) Q99LY9" source="4432" target="4190" cy:directed="1"/>
      <edge id="7541" label="Q9CQC7 (pp) Q9D6J5" source="4432" target="4425" cy:directed="1"/>
      <edge id="7540" label="Q9CQC7 (pp) Q8K3J1" source="4432" target="4342" cy:directed="1"/>
      <edge id="7539" label="Q9CQC7 (pp) Q9CQH3" source="4432" target="4178" cy:directed="1"/>
      <edge id="7538" label="Q9CQC7 (pp) Q9DCJ5" source="4432" target="4318" cy:directed="1"/>
      <edge id="7537" label="Q9CQC7 (pp) Q9CQZ6" source="4432" target="4169" cy:directed="1"/>
      <edge id="7536" label="Q9CQC7 (pp) Q9DC69" source="4432" target="4345" cy:directed="1"/>
      <edge id="7535" label="Q9CQC7 (pp) Q9Z1P6" source="4432" target="4237" cy:directed="1"/>
      <edge id="7534" label="Q9CQC7 (pp) Q06185" source="4432" target="4209" cy:directed="1"/>
      <edge id="7533" label="Q9CQC7 (pp) Q9CQ54" source="4432" target="4170" cy:directed="1"/>
      <edge id="7532" label="Q9CVB6 (pp) P59999" source="4431" target="4430" cy:directed="1"/>
      <edge id="7531" label="Q9CVB6 (pp) P47757" source="4431" target="4164" cy:directed="1"/>
      <edge id="7530" label="Q9CVB6 (pp) Q9D898" source="4431" target="4359" cy:directed="1"/>
      <edge id="7529" label="Q9CVB6 (pp) Q99JY9" source="4431" target="4373" cy:directed="1"/>
      <edge id="7528" label="Q9CVB6 (pp) P60710" source="4431" target="4280" cy:directed="1"/>
      <edge id="7527" label="Q9CVB6 (pp) Q9R0Q6" source="4431" target="4315" cy:directed="1"/>
      <edge id="7526" label="Q9CVB6 (pp) P67871" source="4431" target="4600" cy:directed="1"/>
      <edge id="7525" label="Q9CVB6 (pp) Q9CPW4" source="4431" target="4452" cy:directed="1"/>
      <edge id="7524" label="Q9CVB6 (pp) Q9JM76" source="4431" target="4316" cy:directed="1"/>
      <edge id="7523" label="Q5FWK3 (pp) Q9QUI0" source="4428" target="4155" cy:directed="1"/>
      <edge id="7522" label="Q5FWK3 (pp) P63005" source="4428" target="4244" cy:directed="1"/>
      <edge id="7521" label="Q9WTT4 (pp) P63082" source="4427" target="4386" cy:directed="1"/>
      <edge id="7520" label="Q9WTT4 (pp) P50516" source="4427" target="4231" cy:directed="1"/>
      <edge id="7519" label="Q00612 (pp) P06745" source="4426" target="4402" cy:directed="1"/>
      <edge id="7518" label="Q00612 (pp) Q9DCD0" source="4426" target="4160" cy:directed="1"/>
      <edge id="7517" label="Q00612 (pp) P17751" source="4426" target="4235" cy:directed="1"/>
      <edge id="7516" label="Q00612 (pp) P97807" source="4426" target="4278" cy:directed="1"/>
      <edge id="7515" label="Q00612 (pp) P09671" source="4426" target="4382" cy:directed="1"/>
      <edge id="7514" label="Q00612 (pp) P40142" source="4426" target="4297" cy:directed="1"/>
      <edge id="7513" label="Q00612 (pp) Q93092" source="4426" target="4392" cy:directed="1"/>
      <edge id="7512" label="Q9D6J5 (pp) Q9CPQ8" source="4425" target="4202" cy:directed="1"/>
      <edge id="7511" label="Q9D6J5 (pp) Q91YT0" source="4425" target="4317" cy:directed="1"/>
      <edge id="7510" label="Q9D6J5 (pp) Q9DC69" source="4425" target="4345" cy:directed="1"/>
      <edge id="7509" label="Q9D6J5 (pp) Q9D3D9" source="4425" target="4148" cy:directed="1"/>
      <edge id="7508" label="Q9D6J5 (pp) Q9CQQ7" source="4425" target="4347" cy:directed="1"/>
      <edge id="7507" label="Q9D6J5 (pp) Q9CQZ6" source="4425" target="4169" cy:directed="1"/>
      <edge id="7506" label="Q9D6J5 (pp) O09111" source="4425" target="4149" cy:directed="1"/>
      <edge id="7505" label="Q9D6J5 (pp) Q9ERS2" source="4425" target="4277" cy:directed="1"/>
      <edge id="7504" label="Q9D6J5 (pp) Q9DCJ5" source="4425" target="4318" cy:directed="1"/>
      <edge id="7503" label="Q9D6J5 (pp) Q9CQ69" source="4425" target="4172" cy:directed="1"/>
      <edge id="7502" label="Q9D6J5 (pp) Q9DB77" source="4425" target="4343" cy:directed="1"/>
      <edge id="7501" label="Q9D6J5 (pp) Q99LC3" source="4425" target="4189" cy:directed="1"/>
      <edge id="7500" label="Q9D6J5 (pp) Q9DCS9" source="4425" target="4204" cy:directed="1"/>
      <edge id="7499" label="Q9D6J5 (pp) Q3UIU2" source="4425" target="4226" cy:directed="1"/>
      <edge id="7498" label="Q9D6J5 (pp) Q06185" source="4425" target="4209" cy:directed="1"/>
      <edge id="7497" label="Q9D6J5 (pp) Q9CZ13" source="4425" target="4187" cy:directed="1"/>
      <edge id="7496" label="Q9D6J5 (pp) Q9D6J6" source="4425" target="4145" cy:directed="1"/>
      <edge id="7495" label="Q9D6J5 (pp) Q8K3J1" source="4425" target="4342" cy:directed="1"/>
      <edge id="7494" label="Q9D6J5 (pp) Q99LX0" source="4425" target="4255" cy:directed="1"/>
      <edge id="7493" label="Q9D6J5 (pp) Q9CQH3" source="4425" target="4178" cy:directed="1"/>
      <edge id="7492" label="Q9D6J5 (pp) Q9Z1P6" source="4425" target="4237" cy:directed="1"/>
      <edge id="7491" label="Q9D6J5 (pp) Q9CQ54" source="4425" target="4170" cy:directed="1"/>
      <edge id="7490" label="Q9D6J5 (pp) Q91VD9" source="4425" target="4203" cy:directed="1"/>
      <edge id="7489" label="Q9D6J5 (pp) Q91VR2" source="4425" target="4201" cy:directed="1"/>
      <edge id="7488" label="P23506 (pp) Q9CQH3" source="4424" target="4178" cy:directed="1"/>
      <edge id="7487" label="Q6PCP5 (pp) P23506" source="4423" target="4424" cy:directed="1"/>
      <edge id="7486" label="Q8VDN2 (pp) P35438" source="4422" target="4153" cy:directed="1"/>
      <edge id="7485" label="Q8VDN2 (pp) P14094" source="4422" target="4374" cy:directed="1"/>
      <edge id="7484" label="Q8VDN2 (pp) Q01097" source="4422" target="4142" cy:directed="1"/>
      <edge id="7483" label="Q8VDN2 (pp) P63044" source="4422" target="4338" cy:directed="1"/>
      <edge id="7482" label="Q8VDN2 (pp) P70414" source="4422" target="4513" cy:directed="1"/>
      <edge id="7481" label="Q8VDN2 (pp) P60879" source="4422" target="4319" cy:directed="1"/>
      <edge id="7480" label="Q8VDN2 (pp) P23819" source="4422" target="4157" cy:directed="1"/>
      <edge id="7479" label="Q9QWI6 (pp) Q68FF6" source="4418" target="4521" cy:directed="1"/>
      <edge id="7478" label="Q9QWI6 (pp) P05480" source="4418" target="4282" cy:directed="1"/>
      <edge id="7477" label="Q9QWI6 (pp) Q8R001" source="4418" target="4419" cy:directed="1"/>
      <edge id="7476" label="P63101 (pp) Q64332" source="4417" target="4536" cy:directed="1"/>
      <edge id="7475" label="P63101 (pp) P10637" source="4417" target="4472" cy:directed="1"/>
      <edge id="7474" label="P63101 (pp) P20357" source="4417" target="4558" cy:directed="1"/>
      <edge id="7473" label="P63101 (pp) P08553" source="4417" target="4655" cy:directed="1"/>
      <edge id="7472" label="P63101 (pp) Q80U28" source="4417" target="4597" cy:directed="1"/>
      <edge id="7471" label="P63101 (pp) P17156" source="4417" target="4516" cy:directed="1"/>
      <edge id="7470" label="P63101 (pp) P47757" source="4417" target="4164" cy:directed="1"/>
      <edge id="7469" label="P63101 (pp) Q8BPN8" source="4417" target="4385" cy:directed="1"/>
      <edge id="7468" label="P63101 (pp) P16546" source="4417" target="4166" cy:directed="1"/>
      <edge id="7467" label="P63101 (pp) P13020" source="4417" target="4715" cy:directed="1"/>
      <edge id="7466" label="P63101 (pp) F6SEU4" source="4417" target="4701" cy:directed="1"/>
      <edge id="7465" label="P63101 (pp) Q60875" source="4417" target="4579" cy:directed="1"/>
      <edge id="7464" label="P63101 (pp) Q920I9" source="4417" target="4401" cy:directed="1"/>
      <edge id="7463" label="P63101 (pp) Q9R0K7" source="4417" target="4361" cy:directed="1"/>
      <edge id="7462" label="P63101 (pp) P30999" source="4417" target="4522" cy:directed="1"/>
      <edge id="7461" label="P63101 (pp) P60469" source="4417" target="4551" cy:directed="1"/>
      <edge id="7460" label="P63101 (pp) P12367" source="4417" target="4355" cy:directed="1"/>
      <edge id="7459" label="P63101 (pp) P16330" source="4417" target="4503" cy:directed="1"/>
      <edge id="7458" label="P63101 (pp) P28652" source="4417" target="4514" cy:directed="1"/>
      <edge id="7457" label="P63101 (pp) Q7TSJ2" source="4417" target="4658" cy:directed="1"/>
      <edge id="7456" label="P63101 (pp) Q925I1" source="4417" target="4527" cy:directed="1"/>
      <edge id="7455" label="P63101 (pp) P28740" source="4417" target="4630" cy:directed="1"/>
      <edge id="7454" label="P63101 (pp) P46660" source="4417" target="4339" cy:directed="1"/>
      <edge id="7453" label="P63101 (pp) O88935" source="4417" target="4369" cy:directed="1"/>
      <edge id="7452" label="P63101 (pp) Q62465" source="4417" target="4574" cy:directed="1"/>
      <edge id="7451" label="P63101 (pp) P63328" source="4417" target="4553" cy:directed="1"/>
      <edge id="7450" label="P63101 (pp) P62482" source="4417" target="4523" cy:directed="1"/>
      <edge id="7449" label="Q61879 (pp) P35438" source="4416" target="4153" cy:directed="1"/>
      <edge id="7448" label="Q61879 (pp) P63101" source="4416" target="4417" cy:directed="1"/>
      <edge id="7447" label="Q91ZA3 (pp) Q99JY0" source="4415" target="4322" cy:directed="1"/>
      <edge id="7446" label="Q91ZA3 (pp) Q9EQ20" source="4415" target="4300" cy:directed="1"/>
      <edge id="7445" label="Q3UMR5 (pp) P50516" source="4414" target="4231" cy:directed="1"/>
      <edge id="7444" label="P56382 (pp) Q03265" source="4413" target="4150" cy:directed="1"/>
      <edge id="7443" label="P56382 (pp) Q91VM9" source="4413" target="4344" cy:directed="1"/>
      <edge id="7442" label="P56382 (pp) Q91VR2" source="4413" target="4201" cy:directed="1"/>
      <edge id="7441" label="P56382 (pp) P56480" source="4413" target="4196" cy:directed="1"/>
      <edge id="7440" label="P56382 (pp) Q9D3D9" source="4413" target="4148" cy:directed="1"/>
      <edge id="7439" label="P56382 (pp) Q9CQZ5" source="4413" target="4144" cy:directed="1"/>
      <edge id="7438" label="P56382 (pp) P03930" source="4413" target="4326" cy:directed="1"/>
      <edge id="7437" label="P56382 (pp) Q9CQQ7" source="4413" target="4347" cy:directed="1"/>
      <edge id="7436" label="P56382 (pp) Q9DB20" source="4413" target="4177" cy:directed="1"/>
      <edge id="7435" label="P56382 (pp) Q99LX0" source="4413" target="4255" cy:directed="1"/>
      <edge id="7434" label="P56382 (pp) Q9DCX2" source="4413" target="4304" cy:directed="1"/>
      <edge id="7433" label="P56382 (pp) Q06185" source="4413" target="4209" cy:directed="1"/>
      <edge id="7432" label="P56382 (pp) P97450" source="4413" target="4368" cy:directed="1"/>
      <edge id="7431" label="P09103 (pp) Q922R8" source="4412" target="4471" cy:directed="1"/>
      <edge id="7430" label="P09103 (pp) P04925" source="4412" target="4323" cy:directed="1"/>
      <edge id="7429" label="P09103 (pp) P63038" source="4412" target="4185" cy:directed="1"/>
      <edge id="7428" label="P14873 (pp) Q9QYR6" source="4411" target="4546" cy:directed="1"/>
      <edge id="7427" label="P14873 (pp) P63005" source="4411" target="4244" cy:directed="1"/>
      <edge id="7426" label="P14873 (pp) P62259" source="4411" target="4163" cy:directed="1"/>
      <edge id="7425" label="P43024 (pp) Q9ERS2" source="4410" target="4277" cy:directed="1"/>
      <edge id="7424" label="P43024 (pp) P56391" source="4410" target="4269" cy:directed="1"/>
      <edge id="7423" label="P43024 (pp) Q9DCX2" source="4410" target="4304" cy:directed="1"/>
      <edge id="7422" label="P43024 (pp) Q9D3D9" source="4410" target="4148" cy:directed="1"/>
      <edge id="7421" label="P43024 (pp) P00405" source="4410" target="4607" cy:directed="1"/>
      <edge id="7420" label="P43024 (pp) Q91VR2" source="4410" target="4201" cy:directed="1"/>
      <edge id="7419" label="P43024 (pp) Q9CQ69" source="4410" target="4172" cy:directed="1"/>
      <edge id="7418" label="Q62420 (pp) P39053" source="4409" target="4435" cy:directed="1"/>
      <edge id="7417" label="Q62420 (pp) O08585" source="4409" target="4545" cy:directed="1"/>
      <edge id="7416" label="Q9EP69 (pp) Q8CHC4" source="4408" target="4577" cy:directed="1"/>
      <edge id="7415" label="Q9EP69 (pp) Q68FD5" source="4408" target="4314" cy:directed="1"/>
      <edge id="7414" label="Q9EP69 (pp) Q62420" source="4408" target="4409" cy:directed="1"/>
      <edge id="7413" label="P26040 (pp) P11627" source="4407" target="4499" cy:directed="1"/>
      <edge id="7412" label="P70441 (pp) P26040" source="4406" target="4407" cy:directed="1"/>
      <edge id="7411" label="P61264 (pp) P63044" source="4405" target="4338" cy:directed="1"/>
      <edge id="7410" label="Q7TPR4 (pp) Q2PFD7" source="4404" target="4688" cy:directed="1"/>
      <edge id="7409" label="Q3UTJ2 (pp) O08917" source="4403" target="4680" cy:directed="1"/>
      <edge id="7408" label="Q3UTJ2 (pp) Q7TPR4" source="4403" target="4404" cy:directed="1"/>
      <edge id="7407" label="P06745 (pp) P17710" source="4402" target="4260" cy:directed="1"/>
      <edge id="7406" label="P06745 (pp) P05063" source="4402" target="4450" cy:directed="1"/>
      <edge id="7405" label="P06745 (pp) P09411" source="4402" target="4236" cy:directed="1"/>
      <edge id="7404" label="P06745 (pp) P16858" source="4402" target="4497" cy:directed="1"/>
      <edge id="7403" label="P06745 (pp) P06151" source="4402" target="4176" cy:directed="1"/>
      <edge id="7402" label="P06745 (pp) Q9D0F9" source="4402" target="4573" cy:directed="1"/>
      <edge id="7401" label="P06745 (pp) Q9DCD0" source="4402" target="4160" cy:directed="1"/>
      <edge id="7400" label="P06745 (pp) P17182" source="4402" target="4453" cy:directed="1"/>
      <edge id="7399" label="P06745 (pp) O55023" source="4402" target="4580" cy:directed="1"/>
      <edge id="7398" label="P06745 (pp) P47857" source="4402" target="4469" cy:directed="1"/>
      <edge id="7397" label="P06745 (pp) Q05920" source="4402" target="4192" cy:directed="1"/>
      <edge id="7396" label="P06745 (pp) Q9WUM5" source="4402" target="4214" cy:directed="1"/>
      <edge id="7395" label="P06745 (pp) Q9WUA3" source="4402" target="4448" cy:directed="1"/>
      <edge id="7394" label="P06745 (pp) P05064" source="4402" target="4259" cy:directed="1"/>
      <edge id="7393" label="Q920I9 (pp) Q8BPN8" source="4401" target="4385" cy:directed="1"/>
      <edge id="7392" label="Q923T9 (pp) P63101" source="4400" target="4417" cy:directed="1"/>
      <edge id="7391" label="Q923T9 (pp) P35436" source="4400" target="4158" cy:directed="1"/>
      <edge id="7390" label="P63040 (pp) P63044" source="4399" target="4338" cy:directed="1"/>
      <edge id="7389" label="Q61831 (pp) Q01097" source="4398" target="4142" cy:directed="1"/>
      <edge id="7388" label="Q61831 (pp) P35438" source="4398" target="4153" cy:directed="1"/>
      <edge id="7387" label="P50544 (pp) Q8BMS1" source="4397" target="4454" cy:directed="1"/>
      <edge id="7386" label="P50544 (pp) Q91WC3" source="4397" target="4560" cy:directed="1"/>
      <edge id="7385" label="P50544 (pp) P41216" source="4397" target="4566" cy:directed="1"/>
      <edge id="7384" label="Q9Z2I9 (pp) Q99LC5" source="4396" target="4253" cy:directed="1"/>
      <edge id="7383" label="Q9Z2I9 (pp) P97807" source="4396" target="4278" cy:directed="1"/>
      <edge id="7382" label="Q9Z2I9 (pp) Q9D023" source="4396" target="4354" cy:directed="1"/>
      <edge id="7381" label="Q9Z2I9 (pp) Q9D2G2" source="4396" target="4225" cy:directed="1"/>
      <edge id="7380" label="Q9Z2I9 (pp) P50516" source="4396" target="4231" cy:directed="1"/>
      <edge id="7379" label="Q9Z2I9 (pp) Q8R4N0" source="4396" target="4289" cy:directed="1"/>
      <edge id="7378" label="Q9Z2I9 (pp) Q03265" source="4396" target="4150" cy:directed="1"/>
      <edge id="7377" label="Q9Z2I9 (pp) Q8CAQ8" source="4396" target="4491" cy:directed="1"/>
      <edge id="7376" label="Q9Z2I9 (pp) Q91VD9" source="4396" target="4203" cy:directed="1"/>
      <edge id="7375" label="Q9Z2I9 (pp) P23506" source="4396" target="4424" cy:directed="1"/>
      <edge id="7374" label="Q9Z2I9 (pp) Q9WUM5" source="4396" target="4214" cy:directed="1"/>
      <edge id="7373" label="Q9Z2I9 (pp) Q60597" source="4396" target="4449" cy:directed="1"/>
      <edge id="7372" label="Q61301 (pp) P15116" source="4395" target="4444" cy:directed="1"/>
      <edge id="7371" label="Q9DB05 (pp) P46460" source="4394" target="4221" cy:directed="1"/>
      <edge id="7370" label="P52480 (pp) P17710" source="4393" target="4260" cy:directed="1"/>
      <edge id="7369" label="P52480 (pp) P06745" source="4393" target="4402" cy:directed="1"/>
      <edge id="7368" label="P52480 (pp) P05064" source="4393" target="4259" cy:directed="1"/>
      <edge id="7367" label="P52480 (pp) Q05920" source="4393" target="4192" cy:directed="1"/>
      <edge id="7366" label="P52480 (pp) Q9WUB3" source="4393" target="4575" cy:directed="1"/>
      <edge id="7365" label="P52480 (pp) P06151" source="4393" target="4176" cy:directed="1"/>
      <edge id="7364" label="P52480 (pp) Q9DCD0" source="4393" target="4160" cy:directed="1"/>
      <edge id="7363" label="P52480 (pp) P09411" source="4393" target="4236" cy:directed="1"/>
      <edge id="7362" label="P52480 (pp) P05063" source="4393" target="4450" cy:directed="1"/>
      <edge id="7361" label="P52480 (pp) Q8BH04" source="4393" target="4562" cy:directed="1"/>
      <edge id="7360" label="P52480 (pp) Q9WUA3" source="4393" target="4448" cy:directed="1"/>
      <edge id="7359" label="P52480 (pp) P47857" source="4393" target="4469" cy:directed="1"/>
      <edge id="7358" label="P52480 (pp) Q9R0Y5" source="4393" target="4510" cy:directed="1"/>
      <edge id="7357" label="P52480 (pp) P17182" source="4393" target="4453" cy:directed="1"/>
      <edge id="7356" label="P52480 (pp) P54071" source="4393" target="4175" cy:directed="1"/>
      <edge id="7355" label="Q93092 (pp) P97807" source="4392" target="4278" cy:directed="1"/>
      <edge id="7354" label="Q93092 (pp) P05063" source="4392" target="4450" cy:directed="1"/>
      <edge id="7353" label="Q93092 (pp) P05064" source="4392" target="4259" cy:directed="1"/>
      <edge id="7352" label="Q93092 (pp) P06745" source="4392" target="4402" cy:directed="1"/>
      <edge id="7351" label="Q93092 (pp) Q9D0F9" source="4392" target="4573" cy:directed="1"/>
      <edge id="7350" label="Q93092 (pp) P17710" source="4392" target="4260" cy:directed="1"/>
      <edge id="7349" label="Q93092 (pp) Q9WUA3" source="4392" target="4448" cy:directed="1"/>
      <edge id="7348" label="Q93092 (pp) P17182" source="4392" target="4453" cy:directed="1"/>
      <edge id="7347" label="Q93092 (pp) Q9DCD0" source="4392" target="4160" cy:directed="1"/>
      <edge id="7346" label="Q93092 (pp) P06151" source="4392" target="4176" cy:directed="1"/>
      <edge id="7345" label="Q93092 (pp) P47857" source="4392" target="4469" cy:directed="1"/>
      <edge id="7344" label="Q93092 (pp) P52480" source="4392" target="4393" cy:directed="1"/>
      <edge id="7343" label="Q9JHI5 (pp) Q99LC5" source="4391" target="4253" cy:directed="1"/>
      <edge id="7342" label="Q9JHI5 (pp) Q61425" source="4391" target="4252" cy:directed="1"/>
      <edge id="7341" label="Q9JHI5 (pp) Q99MR8" source="4391" target="4563" cy:directed="1"/>
      <edge id="7340" label="Q9JHI5 (pp) Q8BMS1" source="4391" target="4454" cy:directed="1"/>
      <edge id="7339" label="P53395 (pp) Q9DBL1" source="4390" target="4389" cy:directed="1"/>
      <edge id="7338" label="P53395 (pp) Q3ULD5" source="4390" target="4288" cy:directed="1"/>
      <edge id="7337" label="P53395 (pp) Q9D051" source="4390" target="4147" cy:directed="1"/>
      <edge id="7336" label="P53395 (pp) Q99MN9" source="4390" target="4372" cy:directed="1"/>
      <edge id="7335" label="P53395 (pp) Q60597" source="4390" target="4449" cy:directed="1"/>
      <edge id="7334" label="P53395 (pp) Q8K2B3" source="4390" target="4285" cy:directed="1"/>
      <edge id="7333" label="P53395 (pp) P35486" source="4390" target="4377" cy:directed="1"/>
      <edge id="7332" label="P53395 (pp) Q9WUM5" source="4390" target="4214" cy:directed="1"/>
      <edge id="7331" label="P53395 (pp) O08749" source="4390" target="4146" cy:directed="1"/>
      <edge id="7330" label="P53395 (pp) Q9JHI5" source="4390" target="4391" cy:directed="1"/>
      <edge id="7329" label="Q9DBL1 (pp) Q8BMS1" source="4389" target="4454" cy:directed="1"/>
      <edge id="7328" label="Q9CQ92 (pp) Q8BZ98" source="4387" target="4622" cy:directed="1"/>
      <edge id="7327" label="Q9CQ92 (pp) Q6PCP5" source="4387" target="4423" cy:directed="1"/>
      <edge id="7326" label="Q9CQ92 (pp) Q8K1M6" source="4387" target="4388" cy:directed="1"/>
      <edge id="7325" label="Q8BPN8 (pp) Q5SQX6" source="4385" target="4541" cy:directed="1"/>
      <edge id="7324" label="Q8BPN8 (pp) P12382" source="4385" target="4152" cy:directed="1"/>
      <edge id="7323" label="Q8BPN8 (pp) Q9Z1G3" source="4385" target="4162" cy:directed="1"/>
      <edge id="7322" label="Q8BPN8 (pp) P63318" source="4385" target="4604" cy:directed="1"/>
      <edge id="7321" label="Q8BPN8 (pp) Q9WUA3" source="4385" target="4448" cy:directed="1"/>
      <edge id="7320" label="Q8BPN8 (pp) P28660" source="4385" target="4320" cy:directed="1"/>
      <edge id="7319" label="Q8BPN8 (pp) P70404" source="4385" target="4232" cy:directed="1"/>
      <edge id="7318" label="P18572 (pp) O35465" source="4383" target="4384" cy:directed="1"/>
      <edge id="7317" label="P09671 (pp) Q99KI0" source="4382" target="4276" cy:directed="1"/>
      <edge id="7316" label="P09671 (pp) Q9WUM5" source="4382" target="4214" cy:directed="1"/>
      <edge id="7315" label="P09671 (pp) Q03265" source="4382" target="4150" cy:directed="1"/>
      <edge id="7314" label="P09671 (pp) Q9QUH0" source="4382" target="4364" cy:directed="1"/>
      <edge id="7313" label="P09671 (pp) Q9CQA3" source="4382" target="4250" cy:directed="1"/>
      <edge id="7312" label="P09671 (pp) Q9CR68" source="4382" target="4205" cy:directed="1"/>
      <edge id="7311" label="P09671 (pp) P20108" source="4382" target="4365" cy:directed="1"/>
      <edge id="7310" label="P09671 (pp) Q9DCJ5" source="4382" target="4318" cy:directed="1"/>
      <edge id="7309" label="P09671 (pp) P97807" source="4382" target="4278" cy:directed="1"/>
      <edge id="7308" label="P09671 (pp) Q8K3J1" source="4382" target="4342" cy:directed="1"/>
      <edge id="7307" label="P09671 (pp) P17751" source="4382" target="4235" cy:directed="1"/>
      <edge id="7306" label="P09671 (pp) Q9D6J5" source="4382" target="4425" cy:directed="1"/>
      <edge id="7305" label="P09671 (pp) Q80Y14" source="4382" target="4540" cy:directed="1"/>
      <edge id="7304" label="P09671 (pp) Q64521" source="4382" target="4363" cy:directed="1"/>
      <edge id="7303" label="P09671 (pp) Q9D0M3" source="4382" target="4188" cy:directed="1"/>
      <edge id="7302" label="P09671 (pp) Q99LX0" source="4382" target="4255" cy:directed="1"/>
      <edge id="7301" label="P09671 (pp) P52503" source="4382" target="4290" cy:directed="1"/>
      <edge id="7300" label="P09671 (pp) Q91YT0" source="4382" target="4317" cy:directed="1"/>
      <edge id="7299" label="P09671 (pp) Q9DCD0" source="4382" target="4160" cy:directed="1"/>
      <edge id="7298" label="P09671 (pp) Q9DC69" source="4382" target="4345" cy:directed="1"/>
      <edge id="7297" label="P09671 (pp) P08249" source="4382" target="4173" cy:directed="1"/>
      <edge id="7296" label="P09671 (pp) Q9DC70" source="4382" target="4210" cy:directed="1"/>
      <edge id="7295" label="P09671 (pp) P63038" source="4382" target="4185" cy:directed="1"/>
      <edge id="7294" label="P09671 (pp) Q9CXZ1" source="4382" target="4334" cy:directed="1"/>
      <edge id="7293" label="P09671 (pp) O70325" source="4382" target="4240" cy:directed="1"/>
      <edge id="7292" label="P09671 (pp) Q9CQQ7" source="4382" target="4347" cy:directed="1"/>
      <edge id="7291" label="P09671 (pp) P99029" source="4382" target="4294" cy:directed="1"/>
      <edge id="7290" label="P09671 (pp) P06745" source="4382" target="4402" cy:directed="1"/>
      <edge id="7289" label="P09671 (pp) Q9D2G2" source="4382" target="4225" cy:directed="1"/>
      <edge id="7288" label="P09671 (pp) Q9CPP6" source="4382" target="4219" cy:directed="1"/>
      <edge id="7287" label="P09671 (pp) Q9D6J6" source="4382" target="4145" cy:directed="1"/>
      <edge id="7286" label="P09671 (pp) Q91VD9" source="4382" target="4203" cy:directed="1"/>
      <edge id="7285" label="P09671 (pp) P09411" source="4382" target="4236" cy:directed="1"/>
      <edge id="7284" label="P09671 (pp) Q9CQH3" source="4382" target="4178" cy:directed="1"/>
      <edge id="7283" label="P16054 (pp) P05480" source="4381" target="4282" cy:directed="1"/>
      <edge id="7282" label="P16054 (pp) P67778" source="4381" target="4199" cy:directed="1"/>
      <edge id="7281" label="P16054 (pp) P17182" source="4381" target="4453" cy:directed="1"/>
      <edge id="7280" label="P16054 (pp) Q9CQA3" source="4381" target="4250" cy:directed="1"/>
      <edge id="7279" label="P16054 (pp) Q9CQ62" source="4381" target="4223" cy:directed="1"/>
      <edge id="7278" label="P16054 (pp) Q9CQR4" source="4381" target="4296" cy:directed="1"/>
      <edge id="7277" label="P16054 (pp) P35438" source="4381" target="4153" cy:directed="1"/>
      <edge id="7276" label="P16054 (pp) Q99JY0" source="4381" target="4322" cy:directed="1"/>
      <edge id="7275" label="P16054 (pp) Q9CR62" source="4381" target="4684" cy:directed="1"/>
      <edge id="7274" label="P16054 (pp) P23242" source="4381" target="4670" cy:directed="1"/>
      <edge id="7273" label="P16054 (pp) P63038" source="4381" target="4185" cy:directed="1"/>
      <edge id="7272" label="P16054 (pp) P48962" source="4381" target="4636" cy:directed="1"/>
      <edge id="7271" label="P16054 (pp) O35643" source="4381" target="4617" cy:directed="1"/>
      <edge id="7270" label="P16054 (pp) Q8BMS1" source="4381" target="4454" cy:directed="1"/>
      <edge id="7269" label="P16054 (pp) P16858" source="4381" target="4497" cy:directed="1"/>
      <edge id="7268" label="P16054 (pp) P47757" source="4381" target="4164" cy:directed="1"/>
      <edge id="7267" label="P62962 (pp) P60710" source="4380" target="4280" cy:directed="1"/>
      <edge id="7266" label="P62962 (pp) P99024" source="4380" target="4505" cy:directed="1"/>
      <edge id="7265" label="P62962 (pp) P39053" source="4380" target="4435" cy:directed="1"/>
      <edge id="7264" label="P62962 (pp) P59999" source="4380" target="4430" cy:directed="1"/>
      <edge id="7263" label="P62962 (pp) Q9JJV2" source="4380" target="4346" cy:directed="1"/>
      <edge id="7262" label="P22315 (pp) Q9Z1J3" source="4378" target="4481" cy:directed="1"/>
      <edge id="7261" label="P22315 (pp) P63038" source="4378" target="4185" cy:directed="1"/>
      <edge id="7260" label="P22315 (pp) Q61102" source="4378" target="4379" cy:directed="1"/>
      <edge id="7259" label="P35486 (pp) Q8BMF4" source="4377" target="4191" cy:directed="1"/>
      <edge id="7258" label="P35486 (pp) Q05920" source="4377" target="4192" cy:directed="1"/>
      <edge id="7257" label="P35486 (pp) P06151" source="4377" target="4176" cy:directed="1"/>
      <edge id="7256" label="P35486 (pp) P09411" source="4377" target="4236" cy:directed="1"/>
      <edge id="7255" label="P35486 (pp) Q9D2G2" source="4377" target="4225" cy:directed="1"/>
      <edge id="7254" label="P35486 (pp) Q922H2" source="4377" target="4629" cy:directed="1"/>
      <edge id="7253" label="P35486 (pp) Q9DC69" source="4377" target="4345" cy:directed="1"/>
      <edge id="7252" label="P35486 (pp) P52480" source="4377" target="4393" cy:directed="1"/>
      <edge id="7251" label="P35486 (pp) P06745" source="4377" target="4402" cy:directed="1"/>
      <edge id="7250" label="P35486 (pp) Q9WUM5" source="4377" target="4214" cy:directed="1"/>
      <edge id="7249" label="P47754 (pp) P62259" source="4375" target="4163" cy:directed="1"/>
      <edge id="7248" label="P47754 (pp) P47757" source="4375" target="4164" cy:directed="1"/>
      <edge id="7247" label="P47754 (pp) P63101" source="4375" target="4417" cy:directed="1"/>
      <edge id="7246" label="P47754 (pp) P16054" source="4375" target="4381" cy:directed="1"/>
      <edge id="7245" label="P14094 (pp) P04925" source="4374" target="4323" cy:directed="1"/>
      <edge id="7244" label="Q99JY9 (pp) Q9JM76" source="4373" target="4316" cy:directed="1"/>
      <edge id="7243" label="Q99JY9 (pp) P59999" source="4373" target="4430" cy:directed="1"/>
      <edge id="7242" label="Q99JY9 (pp) Q60598" source="4373" target="4486" cy:directed="1"/>
      <edge id="7241" label="Q99JY9 (pp) Q8VDN2" source="4373" target="4422" cy:directed="1"/>
      <edge id="7240" label="Q99JY9 (pp) P14094" source="4373" target="4374" cy:directed="1"/>
      <edge id="7239" label="Q99MN9 (pp) Q05920" source="4372" target="4192" cy:directed="1"/>
      <edge id="7238" label="Q99MN9 (pp) Q99JY0" source="4372" target="4322" cy:directed="1"/>
      <edge id="7237" label="Q99MN9 (pp) Q8BWT1" source="4372" target="4249" cy:directed="1"/>
      <edge id="7236" label="Q99MN9 (pp) Q9WUM5" source="4372" target="4214" cy:directed="1"/>
      <edge id="7235" label="Q99MN9 (pp) Q91ZA3" source="4372" target="4415" cy:directed="1"/>
      <edge id="7234" label="Q99MN9 (pp) Q9EQ20" source="4372" target="4300" cy:directed="1"/>
      <edge id="7233" label="Q99PT1 (pp) P84096" source="4371" target="4642" cy:directed="1"/>
      <edge id="7232" label="Q99PT1 (pp) P26040" source="4371" target="4407" cy:directed="1"/>
      <edge id="7231" label="Q99PT1 (pp) P62746" source="4371" target="4498" cy:directed="1"/>
      <edge id="7230" label="Q99PT1 (pp) P63001" source="4371" target="4336" cy:directed="1"/>
      <edge id="7229" label="Q99PT1 (pp) O35465" source="4371" target="4384" cy:directed="1"/>
      <edge id="7228" label="Q99PT1 (pp) P56480" source="4371" target="4196" cy:directed="1"/>
      <edge id="7227" label="O88935 (pp) P39053" source="4369" target="4435" cy:directed="1"/>
      <edge id="7226" label="P97450 (pp) Q9Z1P6" source="4368" target="4237" cy:directed="1"/>
      <edge id="7225" label="P97450 (pp) P48771" source="4368" target="4241" cy:directed="1"/>
      <edge id="7224" label="P97450 (pp) P19783" source="4368" target="4183" cy:directed="1"/>
      <edge id="7223" label="P97450 (pp) Q8K3J1" source="4368" target="4342" cy:directed="1"/>
      <edge id="7222" label="P97450 (pp) Q9CQQ7" source="4368" target="4347" cy:directed="1"/>
      <edge id="7221" label="P97450 (pp) Q99LX0" source="4368" target="4255" cy:directed="1"/>
      <edge id="7220" label="P97450 (pp) Q9DC69" source="4368" target="4345" cy:directed="1"/>
      <edge id="7219" label="P97450 (pp) Q9DB20" source="4368" target="4177" cy:directed="1"/>
      <edge id="7218" label="P97450 (pp) P56391" source="4368" target="4269" cy:directed="1"/>
      <edge id="7217" label="P97450 (pp) Q9DCJ5" source="4368" target="4318" cy:directed="1"/>
      <edge id="7216" label="P97450 (pp) Q9D023" source="4368" target="4354" cy:directed="1"/>
      <edge id="7215" label="P97450 (pp) Q91VD9" source="4368" target="4203" cy:directed="1"/>
      <edge id="7214" label="P97450 (pp) P56480" source="4368" target="4196" cy:directed="1"/>
      <edge id="7213" label="P97450 (pp) Q9CPP6" source="4368" target="4219" cy:directed="1"/>
      <edge id="7212" label="P97450 (pp) Q9CQ54" source="4368" target="4170" cy:directed="1"/>
      <edge id="7211" label="P97450 (pp) O09111" source="4368" target="4149" cy:directed="1"/>
      <edge id="7210" label="P97450 (pp) Q9CQ69" source="4368" target="4172" cy:directed="1"/>
      <edge id="7209" label="P97450 (pp) Q9CQH3" source="4368" target="4178" cy:directed="1"/>
      <edge id="7208" label="P97450 (pp) P19536" source="4368" target="4311" cy:directed="1"/>
      <edge id="7207" label="P97450 (pp) Q8VEM8" source="4368" target="4287" cy:directed="1"/>
      <edge id="7206" label="P97450 (pp) Q9CPQ8" source="4368" target="4202" cy:directed="1"/>
      <edge id="7205" label="P97450 (pp) Q9CR68" source="4368" target="4205" cy:directed="1"/>
      <edge id="7204" label="P97450 (pp) Q91YT0" source="4368" target="4317" cy:directed="1"/>
      <edge id="7203" label="P97450 (pp) Q3UIU2" source="4368" target="4226" cy:directed="1"/>
      <edge id="7202" label="P97450 (pp) Q9D6J5" source="4368" target="4425" cy:directed="1"/>
      <edge id="7201" label="P97450 (pp) Q99LC5" source="4368" target="4253" cy:directed="1"/>
      <edge id="7200" label="P97450 (pp) O88441" source="4368" target="4233" cy:directed="1"/>
      <edge id="7199" label="P97450 (pp) Q9WUM5" source="4368" target="4214" cy:directed="1"/>
      <edge id="7198" label="P97450 (pp) Q9D3D9" source="4368" target="4148" cy:directed="1"/>
      <edge id="7197" label="P97450 (pp) Q60931" source="4368" target="4494" cy:directed="1"/>
      <edge id="7196" label="P97450 (pp) Q9D6J6" source="4368" target="4145" cy:directed="1"/>
      <edge id="7195" label="P97450 (pp) O35658" source="4368" target="4302" cy:directed="1"/>
      <edge id="7194" label="P97450 (pp) Q91VR2" source="4368" target="4201" cy:directed="1"/>
      <edge id="7193" label="P97450 (pp) Q9DCX2" source="4368" target="4304" cy:directed="1"/>
      <edge id="7192" label="P97450 (pp) Q06185" source="4368" target="4209" cy:directed="1"/>
      <edge id="7191" label="P97450 (pp) Q9DB77" source="4368" target="4343" cy:directed="1"/>
      <edge id="7190" label="P97450 (pp) Q9ERS2" source="4368" target="4277" cy:directed="1"/>
      <edge id="7189" label="P97450 (pp) P03930" source="4368" target="4326" cy:directed="1"/>
      <edge id="7188" label="P97450 (pp) Q9CQZ6" source="4368" target="4169" cy:directed="1"/>
      <edge id="7187" label="P97450 (pp) Q03265" source="4368" target="4150" cy:directed="1"/>
      <edge id="7186" label="P97450 (pp) Q99LY9" source="4368" target="4190" cy:directed="1"/>
      <edge id="7185" label="P97450 (pp) Q9DCS9" source="4368" target="4204" cy:directed="1"/>
      <edge id="7184" label="P97450 (pp) Q91VM9" source="4368" target="4344" cy:directed="1"/>
      <edge id="7183" label="Q64010 (pp) P68510" source="4367" target="4151" cy:directed="1"/>
      <edge id="7182" label="Q64010 (pp) P68254" source="4367" target="4518" cy:directed="1"/>
      <edge id="7181" label="Q64010 (pp) P61982" source="4367" target="4447" cy:directed="1"/>
      <edge id="7180" label="Q64010 (pp) P62259" source="4367" target="4163" cy:directed="1"/>
      <edge id="7179" label="Q64010 (pp) P63101" source="4367" target="4417" cy:directed="1"/>
      <edge id="7178" label="Q64010 (pp) P05480" source="4367" target="4282" cy:directed="1"/>
      <edge id="7177" label="P20108 (pp) P63038" source="4365" target="4185" cy:directed="1"/>
      <edge id="7176" label="P20108 (pp) Q9WUM5" source="4365" target="4214" cy:directed="1"/>
      <edge id="7175" label="P20108 (pp) Q99LC5" source="4365" target="4253" cy:directed="1"/>
      <edge id="7174" label="P20108 (pp) Q9DB77" source="4365" target="4343" cy:directed="1"/>
      <edge id="7173" label="Q9QUH0 (pp) O70325" source="4364" target="4240" cy:directed="1"/>
      <edge id="7172" label="Q9QUH0 (pp) P99029" source="4364" target="4294" cy:directed="1"/>
      <edge id="7171" label="Q9QUH0 (pp) P20108" source="4364" target="4365" cy:directed="1"/>
      <edge id="7170" label="Q64521 (pp) Q3ULJ0" source="4363" target="4697" cy:directed="1"/>
      <edge id="7169" label="Q64521 (pp) Q64516" source="4363" target="4421" cy:directed="1"/>
      <edge id="7168" label="P13707 (pp) P17751" source="4362" target="4235" cy:directed="1"/>
      <edge id="7167" label="P13707 (pp) Q64516" source="4362" target="4421" cy:directed="1"/>
      <edge id="7166" label="P13707 (pp) Q64521" source="4362" target="4363" cy:directed="1"/>
      <edge id="7165" label="Q9R0K7 (pp) P04925" source="4361" target="4323" cy:directed="1"/>
      <edge id="7164" label="Q9R0K7 (pp) P12023" source="4361" target="4263" cy:directed="1"/>
      <edge id="7163" label="Q9D898 (pp) P59999" source="4359" target="4430" cy:directed="1"/>
      <edge id="7162" label="P63017 (pp) Q61699" source="4358" target="4656" cy:directed="1"/>
      <edge id="7161" label="P63017 (pp) Q9QYJ0" source="4358" target="4313" cy:directed="1"/>
      <edge id="7160" label="P63017 (pp) P10637" source="4358" target="4472" cy:directed="1"/>
      <edge id="7159" label="P63017 (pp) P07901" source="4358" target="4446" cy:directed="1"/>
      <edge id="7158" label="P63017 (pp) P62259" source="4358" target="4163" cy:directed="1"/>
      <edge id="7157" label="P63017 (pp) P11499" source="4358" target="4258" cy:directed="1"/>
      <edge id="7156" label="P63017 (pp) P63038" source="4358" target="4185" cy:directed="1"/>
      <edge id="7155" label="P63017 (pp) Q60864" source="4358" target="4312" cy:directed="1"/>
      <edge id="7154" label="P63017 (pp) P63037" source="4358" target="4217" cy:directed="1"/>
      <edge id="7153" label="Q61548 (pp) P17427" source="4356" target="4228" cy:directed="1"/>
      <edge id="7152" label="P12367 (pp) D3YVF0" source="4355" target="4728" cy:directed="1"/>
      <edge id="7151" label="P12367 (pp) Q8BR92" source="4355" target="4438" cy:directed="1"/>
      <edge id="7150" label="Q9D023 (pp) Q9CQH3" source="4354" target="4178" cy:directed="1"/>
      <edge id="7149" label="Q9D023 (pp) Q9D6J6" source="4354" target="4145" cy:directed="1"/>
      <edge id="7148" label="Q9D023 (pp) Q99LC5" source="4354" target="4253" cy:directed="1"/>
      <edge id="7147" label="P56379 (pp) Q9DB20" source="4353" target="4177" cy:directed="1"/>
      <edge id="7146" label="P56379 (pp) Q9CPQ8" source="4353" target="4202" cy:directed="1"/>
      <edge id="7145" label="P56379 (pp) Q9CQZ6" source="4353" target="4169" cy:directed="1"/>
      <edge id="7144" label="P56379 (pp) P97450" source="4353" target="4368" cy:directed="1"/>
      <edge id="7143" label="P56379 (pp) Q9D855" source="4353" target="4341" cy:directed="1"/>
      <edge id="7142" label="P56379 (pp) P52503" source="4353" target="4290" cy:directed="1"/>
      <edge id="7141" label="P56379 (pp) Q9CQZ5" source="4353" target="4144" cy:directed="1"/>
      <edge id="7140" label="P56379 (pp) P48771" source="4353" target="4241" cy:directed="1"/>
      <edge id="7139" label="P56379 (pp) Q9CQ69" source="4353" target="4172" cy:directed="1"/>
      <edge id="7138" label="P56379 (pp) Q9Z1P6" source="4353" target="4237" cy:directed="1"/>
      <edge id="7137" label="P56379 (pp) Q06185" source="4353" target="4209" cy:directed="1"/>
      <edge id="7136" label="P56379 (pp) Q9CQH3" source="4353" target="4178" cy:directed="1"/>
      <edge id="7135" label="P18052 (pp) P05480" source="4352" target="4282" cy:directed="1"/>
      <edge id="7134" label="P18052 (pp) P43406" source="4352" target="4634" cy:directed="1"/>
      <edge id="7133" label="P70232 (pp) P18052" source="4351" target="4352" cy:directed="1"/>
      <edge id="7132" label="Q9CZS1 (pp) P61922" source="4350" target="4262" cy:directed="1"/>
      <edge id="7131" label="Q9CZS1 (pp) Q8CHT0" source="4350" target="4440" cy:directed="1"/>
      <edge id="7130" label="Q9CZS1 (pp) Q9EQ20" source="4350" target="4300" cy:directed="1"/>
      <edge id="7129" label="O35129 (pp) O35658" source="4349" target="4302" cy:directed="1"/>
      <edge id="7128" label="O35129 (pp) P63038" source="4349" target="4185" cy:directed="1"/>
      <edge id="7127" label="O35129 (pp) Q9D0M3" source="4349" target="4188" cy:directed="1"/>
      <edge id="7126" label="O35129 (pp) Q99LX0" source="4349" target="4255" cy:directed="1"/>
      <edge id="7125" label="O35129 (pp) P67778" source="4349" target="4199" cy:directed="1"/>
      <edge id="7124" label="O35129 (pp) Q9DCT2" source="4349" target="4171" cy:directed="1"/>
      <edge id="7123" label="O35129 (pp) Q9CZ13" source="4349" target="4187" cy:directed="1"/>
      <edge id="7122" label="O35129 (pp) Q8BGH2" source="4349" target="4254" cy:directed="1"/>
      <edge id="7121" label="O35129 (pp) P62073" source="4349" target="4293" cy:directed="1"/>
      <edge id="7120" label="O88696 (pp) Q9CQA3" source="4348" target="4250" cy:directed="1"/>
      <edge id="7119" label="O88696 (pp) Q8K3J1" source="4348" target="4342" cy:directed="1"/>
      <edge id="7118" label="O88696 (pp) P97807" source="4348" target="4278" cy:directed="1"/>
      <edge id="7117" label="O88696 (pp) P56480" source="4348" target="4196" cy:directed="1"/>
      <edge id="7116" label="O88696 (pp) Q9CZ13" source="4348" target="4187" cy:directed="1"/>
      <edge id="7115" label="O88696 (pp) Q99LX0" source="4348" target="4255" cy:directed="1"/>
      <edge id="7114" label="O88696 (pp) Q9Z1P6" source="4348" target="4237" cy:directed="1"/>
      <edge id="7113" label="O88696 (pp) P67778" source="4348" target="4199" cy:directed="1"/>
      <edge id="7112" label="O88696 (pp) Q9DCT2" source="4348" target="4171" cy:directed="1"/>
      <edge id="7111" label="O88696 (pp) Q8CGK3" source="4348" target="4696" cy:directed="1"/>
      <edge id="7110" label="O88696 (pp) P17751" source="4348" target="4235" cy:directed="1"/>
      <edge id="7109" label="O88696 (pp) Q91Z53" source="4348" target="4273" cy:directed="1"/>
      <edge id="7108" label="O88696 (pp) P52503" source="4348" target="4290" cy:directed="1"/>
      <edge id="7107" label="O88696 (pp) O08756" source="4348" target="4321" cy:directed="1"/>
      <edge id="7106" label="O88696 (pp) Q91YT0" source="4348" target="4317" cy:directed="1"/>
      <edge id="7105" label="O88696 (pp) P42125" source="4348" target="4457" cy:directed="1"/>
      <edge id="7104" label="O88696 (pp) Q8BGH2" source="4348" target="4254" cy:directed="1"/>
      <edge id="7103" label="O88696 (pp) Q9DC70" source="4348" target="4210" cy:directed="1"/>
      <edge id="7102" label="O88696 (pp) Q9D3D9" source="4348" target="4148" cy:directed="1"/>
      <edge id="7101" label="O88696 (pp) Q9D6J6" source="4348" target="4145" cy:directed="1"/>
      <edge id="7100" label="O88696 (pp) P63038" source="4348" target="4185" cy:directed="1"/>
      <edge id="7099" label="O88696 (pp) Q9DB20" source="4348" target="4177" cy:directed="1"/>
      <edge id="7098" label="O88696 (pp) Q9D0M3" source="4348" target="4188" cy:directed="1"/>
      <edge id="7097" label="O88696 (pp) O35129" source="4348" target="4349" cy:directed="1"/>
      <edge id="7096" label="Q9CQQ7 (pp) Q9D3D9" source="4347" target="4148" cy:directed="1"/>
      <edge id="7095" label="Q9CQQ7 (pp) Q9ERS2" source="4347" target="4277" cy:directed="1"/>
      <edge id="7094" label="Q9CQQ7 (pp) Q9D6J6" source="4347" target="4145" cy:directed="1"/>
      <edge id="7093" label="Q9CQQ7 (pp) Q3UIU2" source="4347" target="4226" cy:directed="1"/>
      <edge id="7092" label="Q9CQQ7 (pp) Q91VR2" source="4347" target="4201" cy:directed="1"/>
      <edge id="7091" label="Q9CQQ7 (pp) Q99LY9" source="4347" target="4190" cy:directed="1"/>
      <edge id="7090" label="Q9CQQ7 (pp) Q9CQH3" source="4347" target="4178" cy:directed="1"/>
      <edge id="7089" label="Q9JJV2 (pp) O88935" source="4346" target="4369" cy:directed="1"/>
      <edge id="7088" label="Q9JJV2 (pp) P39053" source="4346" target="4435" cy:directed="1"/>
      <edge id="7087" label="Q9JJV2 (pp) Q9QXS6" source="4346" target="4477" cy:directed="1"/>
      <edge id="7086" label="Q9JJV2 (pp) P60710" source="4346" target="4280" cy:directed="1"/>
      <edge id="7085" label="Q9DC69 (pp) Q9ERS2" source="4345" target="4277" cy:directed="1"/>
      <edge id="7084" label="Q9DC69 (pp) Q99LX0" source="4345" target="4255" cy:directed="1"/>
      <edge id="7083" label="Q9DC69 (pp) Q9CQH3" source="4345" target="4178" cy:directed="1"/>
      <edge id="7082" label="Q9DC69 (pp) Q9DCX2" source="4345" target="4304" cy:directed="1"/>
      <edge id="7081" label="Q9DC69 (pp) Q9D6J6" source="4345" target="4145" cy:directed="1"/>
      <edge id="7080" label="Q9DC69 (pp) P99029" source="4345" target="4294" cy:directed="1"/>
      <edge id="7079" label="Q9DC69 (pp) Q9D3D9" source="4345" target="4148" cy:directed="1"/>
      <edge id="7078" label="Q9DC69 (pp) Q9CQQ7" source="4345" target="4347" cy:directed="1"/>
      <edge id="7077" label="Q9DC69 (pp) O09111" source="4345" target="4149" cy:directed="1"/>
      <edge id="7076" label="Q9DC69 (pp) Q91VR2" source="4345" target="4201" cy:directed="1"/>
      <edge id="7075" label="Q91VM9 (pp) Q99LC5" source="4344" target="4253" cy:directed="1"/>
      <edge id="7074" label="Q91VM9 (pp) P63082" source="4344" target="4386" cy:directed="1"/>
      <edge id="7073" label="Q91VM9 (pp) Q9CQQ7" source="4344" target="4347" cy:directed="1"/>
      <edge id="7072" label="Q9DB77 (pp) P00405" source="4343" target="4607" cy:directed="1"/>
      <edge id="7071" label="Q9DB77 (pp) Q8VEM8" source="4343" target="4287" cy:directed="1"/>
      <edge id="7070" label="Q9DB77 (pp) Q9D6J6" source="4343" target="4145" cy:directed="1"/>
      <edge id="7069" label="Q9DB77 (pp) Q9ERS2" source="4343" target="4277" cy:directed="1"/>
      <edge id="7068" label="Q9DB77 (pp) Q99LY9" source="4343" target="4190" cy:directed="1"/>
      <edge id="7067" label="Q9DB77 (pp) Q9DCX2" source="4343" target="4304" cy:directed="1"/>
      <edge id="7066" label="Q9DB77 (pp) Q9CQQ7" source="4343" target="4347" cy:directed="1"/>
      <edge id="7065" label="Q9DB77 (pp) Q9DCS9" source="4343" target="4204" cy:directed="1"/>
      <edge id="7064" label="Q9DB77 (pp) Q9DCJ5" source="4343" target="4318" cy:directed="1"/>
      <edge id="7063" label="Q9DB77 (pp) Q9CR68" source="4343" target="4205" cy:directed="1"/>
      <edge id="7062" label="Q9DB77 (pp) O09111" source="4343" target="4149" cy:directed="1"/>
      <edge id="7061" label="Q9DB77 (pp) Q99P72" source="4343" target="4616" cy:directed="1"/>
      <edge id="7060" label="Q9DB77 (pp) Q3UIU2" source="4343" target="4226" cy:directed="1"/>
      <edge id="7059" label="Q9DB77 (pp) Q99JY0" source="4343" target="4322" cy:directed="1"/>
      <edge id="7058" label="Q9DB77 (pp) Q91VR2" source="4343" target="4201" cy:directed="1"/>
      <edge id="7057" label="Q9DB77 (pp) Q99LC5" source="4343" target="4253" cy:directed="1"/>
      <edge id="7056" label="Q9DB77 (pp) P19783" source="4343" target="4183" cy:directed="1"/>
      <edge id="7055" label="Q9DB77 (pp) P68510" source="4343" target="4151" cy:directed="1"/>
      <edge id="7054" label="Q9DB77 (pp) Q9CQ69" source="4343" target="4172" cy:directed="1"/>
      <edge id="7053" label="Q9DB77 (pp) Q9WUM5" source="4343" target="4214" cy:directed="1"/>
      <edge id="7052" label="Q9DB77 (pp) Q9DC69" source="4343" target="4345" cy:directed="1"/>
      <edge id="7051" label="Q9DB77 (pp) Q91YT0" source="4343" target="4317" cy:directed="1"/>
      <edge id="7050" label="Q9DB77 (pp) Q9CQH3" source="4343" target="4178" cy:directed="1"/>
      <edge id="7049" label="Q8K3J1 (pp) Q91VR2" source="4342" target="4201" cy:directed="1"/>
      <edge id="7048" label="Q8K3J1 (pp) Q9D6J6" source="4342" target="4145" cy:directed="1"/>
      <edge id="7047" label="Q8K3J1 (pp) Q9DC69" source="4342" target="4345" cy:directed="1"/>
      <edge id="7046" label="Q8K3J1 (pp) P56391" source="4342" target="4269" cy:directed="1"/>
      <edge id="7045" label="Q8K3J1 (pp) Q9DCX2" source="4342" target="4304" cy:directed="1"/>
      <edge id="7044" label="Q8K3J1 (pp) Q9CQH3" source="4342" target="4178" cy:directed="1"/>
      <edge id="7043" label="Q8K3J1 (pp) Q9CQQ7" source="4342" target="4347" cy:directed="1"/>
      <edge id="7042" label="Q8K3J1 (pp) Q9ERS2" source="4342" target="4277" cy:directed="1"/>
      <edge id="7041" label="Q8K3J1 (pp) Q9D3D9" source="4342" target="4148" cy:directed="1"/>
      <edge id="7040" label="Q8K3J1 (pp) O09111" source="4342" target="4149" cy:directed="1"/>
      <edge id="7039" label="Q8K3J1 (pp) Q99LX0" source="4342" target="4255" cy:directed="1"/>
      <edge id="7038" label="Q8K3J1 (pp) Q3UIU2" source="4342" target="4226" cy:directed="1"/>
      <edge id="7037" label="Q9D855 (pp) Q9CQH3" source="4341" target="4178" cy:directed="1"/>
      <edge id="7036" label="Q9D855 (pp) Q03265" source="4341" target="4150" cy:directed="1"/>
      <edge id="7035" label="Q9D855 (pp) P43024" source="4341" target="4410" cy:directed="1"/>
      <edge id="7034" label="Q9D855 (pp) Q91YT0" source="4341" target="4317" cy:directed="1"/>
      <edge id="7033" label="Q9D855 (pp) Q8K2B3" source="4341" target="4285" cy:directed="1"/>
      <edge id="7032" label="Q9D855 (pp) Q9ERS2" source="4341" target="4277" cy:directed="1"/>
      <edge id="7031" label="Q9D855 (pp) Q9CQQ7" source="4341" target="4347" cy:directed="1"/>
      <edge id="7030" label="Q9D855 (pp) Q9CZ13" source="4341" target="4187" cy:directed="1"/>
      <edge id="7029" label="Q9D855 (pp) P97450" source="4341" target="4368" cy:directed="1"/>
      <edge id="7028" label="Q9D855 (pp) Q9D0M3" source="4341" target="4188" cy:directed="1"/>
      <edge id="7027" label="Q9D855 (pp) Q91VD9" source="4341" target="4203" cy:directed="1"/>
      <edge id="7026" label="Q9D855 (pp) Q9DCJ5" source="4341" target="4318" cy:directed="1"/>
      <edge id="7025" label="Q9D855 (pp) Q99LY9" source="4341" target="4190" cy:directed="1"/>
      <edge id="7024" label="Q9D855 (pp) Q9CR68" source="4341" target="4205" cy:directed="1"/>
      <edge id="7023" label="Q9D855 (pp) Q9DB20" source="4341" target="4177" cy:directed="1"/>
      <edge id="7022" label="Q9D855 (pp) Q9DC69" source="4341" target="4345" cy:directed="1"/>
      <edge id="7021" label="Q9D855 (pp) Q9DB77" source="4341" target="4343" cy:directed="1"/>
      <edge id="7020" label="Q9D855 (pp) Q9CPP6" source="4341" target="4219" cy:directed="1"/>
      <edge id="7019" label="Q9D855 (pp) P56391" source="4341" target="4269" cy:directed="1"/>
      <edge id="7018" label="Q9D855 (pp) Q06185" source="4341" target="4209" cy:directed="1"/>
      <edge id="7017" label="Q9D855 (pp) Q9CQZ6" source="4341" target="4169" cy:directed="1"/>
      <edge id="7016" label="Q9D855 (pp) Q9D023" source="4341" target="4354" cy:directed="1"/>
      <edge id="7015" label="Q9D855 (pp) Q9DCS9" source="4341" target="4204" cy:directed="1"/>
      <edge id="7014" label="Q9D855 (pp) P97807" source="4341" target="4278" cy:directed="1"/>
      <edge id="7013" label="Q9D855 (pp) P52503" source="4341" target="4290" cy:directed="1"/>
      <edge id="7012" label="Q9D855 (pp) Q3UIU2" source="4341" target="4226" cy:directed="1"/>
      <edge id="7011" label="Q9D855 (pp) Q9CQ69" source="4341" target="4172" cy:directed="1"/>
      <edge id="7010" label="Q9D855 (pp) Q9D6J6" source="4341" target="4145" cy:directed="1"/>
      <edge id="7009" label="Q9D855 (pp) Q9CQJ8" source="4341" target="4208" cy:directed="1"/>
      <edge id="7008" label="Q9D855 (pp) Q9D3D9" source="4341" target="4148" cy:directed="1"/>
      <edge id="7007" label="Q9D855 (pp) Q9CQZ5" source="4341" target="4144" cy:directed="1"/>
      <edge id="7006" label="Q9D855 (pp) Q91VR2" source="4341" target="4201" cy:directed="1"/>
      <edge id="7005" label="Q9D855 (pp) Q9DCX2" source="4341" target="4304" cy:directed="1"/>
      <edge id="7004" label="Q9D855 (pp) Q8K3J1" source="4341" target="4342" cy:directed="1"/>
      <edge id="7003" label="Q9JHU4 (pp) Q8BPN8" source="4340" target="4385" cy:directed="1"/>
      <edge id="7002" label="Q9JHU4 (pp) P63005" source="4340" target="4244" cy:directed="1"/>
      <edge id="7001" label="Q9JHU4 (pp) P07901" source="4340" target="4446" cy:directed="1"/>
      <edge id="7000" label="Q9JHU4 (pp) O08788" source="4340" target="4275" cy:directed="1"/>
      <edge id="6999" label="Q9JHU4 (pp) P68369" source="4340" target="4286" cy:directed="1"/>
      <edge id="6998" label="Q9JHU4 (pp) P63101" source="4340" target="4417" cy:directed="1"/>
      <edge id="6997" label="Q9JHU4 (pp) P68368" source="4340" target="4470" cy:directed="1"/>
      <edge id="6996" label="Q9JHU4 (pp) Q9DC28" source="4340" target="4590" cy:directed="1"/>
      <edge id="6995" label="Q9JHU4 (pp) Q99KJ8" source="4340" target="4274" cy:directed="1"/>
      <edge id="6994" label="Q9JHU4 (pp) Q60996" source="4340" target="4524" cy:directed="1"/>
      <edge id="6993" label="P46660 (pp) P19246" source="4339" target="4596" cy:directed="1"/>
      <edge id="6992" label="P46660 (pp) P35438" source="4339" target="4153" cy:directed="1"/>
      <edge id="6991" label="P63044 (pp) P35802" source="4338" target="4744" cy:directed="1"/>
      <edge id="6990" label="P63044 (pp) P51863" source="4338" target="4161" cy:directed="1"/>
      <edge id="6989" label="P63044 (pp) P18872" source="4338" target="4328" cy:directed="1"/>
      <edge id="6988" label="P63044 (pp) Q6PIE5" source="4338" target="4512" cy:directed="1"/>
      <edge id="6987" label="P63044 (pp) O35526" source="4338" target="4267" cy:directed="1"/>
      <edge id="6986" label="P63044 (pp) P62874" source="4338" target="4299" cy:directed="1"/>
      <edge id="6985" label="P63044 (pp) Q99LX0" source="4338" target="4255" cy:directed="1"/>
      <edge id="6984" label="P63044 (pp) P39053" source="4338" target="4435" cy:directed="1"/>
      <edge id="6983" label="P63044 (pp) Q6PIC6" source="4338" target="4571" cy:directed="1"/>
      <edge id="6982" label="P63044 (pp) P28663" source="4338" target="4568" cy:directed="1"/>
      <edge id="6981" label="P63044 (pp) O55042" source="4338" target="4554" cy:directed="1"/>
      <edge id="6980" label="P63044 (pp) P60766" source="4338" target="4465" cy:directed="1"/>
      <edge id="6979" label="Q62351 (pp) Q68FD5" source="4337" target="4314" cy:directed="1"/>
      <edge id="6978" label="Q62351 (pp) Q91VZ6" source="4337" target="4576" cy:directed="1"/>
      <edge id="6977" label="P63001 (pp) P35438" source="4336" target="4153" cy:directed="1"/>
      <edge id="6976" label="P63001 (pp) P60766" source="4336" target="4465" cy:directed="1"/>
      <edge id="6975" label="P63001 (pp) Q5FWK3" source="4336" target="4428" cy:directed="1"/>
      <edge id="6974" label="Q8BG51 (pp) P84096" source="4335" target="4642" cy:directed="1"/>
      <edge id="6973" label="Q8BG51 (pp) Q5FWK3" source="4335" target="4428" cy:directed="1"/>
      <edge id="6972" label="Q8BG51 (pp) P63001" source="4335" target="4336" cy:directed="1"/>
      <edge id="6971" label="Q9CXZ1 (pp) Q9D6J6" source="4334" target="4145" cy:directed="1"/>
      <edge id="6970" label="Q9CXZ1 (pp) Q91VD9" source="4334" target="4203" cy:directed="1"/>
      <edge id="6969" label="Q9CXZ1 (pp) Q9DC69" source="4334" target="4345" cy:directed="1"/>
      <edge id="6968" label="Q9CXZ1 (pp) Q9DCS9" source="4334" target="4204" cy:directed="1"/>
      <edge id="6967" label="Q9CXZ1 (pp) Q9CQ69" source="4334" target="4172" cy:directed="1"/>
      <edge id="6966" label="Q9CXZ1 (pp) Q8K3J1" source="4334" target="4342" cy:directed="1"/>
      <edge id="6965" label="Q9CXZ1 (pp) Q9ERS2" source="4334" target="4277" cy:directed="1"/>
      <edge id="6964" label="Q9CXZ1 (pp) Q3UIU2" source="4334" target="4226" cy:directed="1"/>
      <edge id="6963" label="Q9CXZ1 (pp) O09111" source="4334" target="4149" cy:directed="1"/>
      <edge id="6962" label="Q9CXZ1 (pp) Q9D0M3" source="4334" target="4188" cy:directed="1"/>
      <edge id="6961" label="Q9CXZ1 (pp) Q9Z1P6" source="4334" target="4237" cy:directed="1"/>
      <edge id="6960" label="Q9CXZ1 (pp) Q9CQJ8" source="4334" target="4208" cy:directed="1"/>
      <edge id="6959" label="Q9CXZ1 (pp) Q62425" source="4334" target="4483" cy:directed="1"/>
      <edge id="6958" label="Q9CXZ1 (pp) Q91YT0" source="4334" target="4317" cy:directed="1"/>
      <edge id="6957" label="Q9CXZ1 (pp) Q9CR68" source="4334" target="4205" cy:directed="1"/>
      <edge id="6956" label="Q9CXZ1 (pp) Q99LY9" source="4334" target="4190" cy:directed="1"/>
      <edge id="6955" label="Q9CXZ1 (pp) Q9DCJ5" source="4334" target="4318" cy:directed="1"/>
      <edge id="6954" label="Q9CXZ1 (pp) Q9CQQ7" source="4334" target="4347" cy:directed="1"/>
      <edge id="6953" label="Q9CXZ1 (pp) Q9CQH3" source="4334" target="4178" cy:directed="1"/>
      <edge id="6952" label="Q9CXZ1 (pp) Q9D6J5" source="4334" target="4425" cy:directed="1"/>
      <edge id="6951" label="Q9CXZ1 (pp) P97450" source="4334" target="4368" cy:directed="1"/>
      <edge id="6950" label="Q9CXZ1 (pp) Q9DB77" source="4334" target="4343" cy:directed="1"/>
      <edge id="6949" label="Q9CXZ1 (pp) Q9CQZ6" source="4334" target="4169" cy:directed="1"/>
      <edge id="6948" label="Q9CXZ1 (pp) Q9CQ54" source="4334" target="4170" cy:directed="1"/>
      <edge id="6947" label="Q9CXZ1 (pp) Q99LC3" source="4334" target="4189" cy:directed="1"/>
      <edge id="6946" label="Q9CXZ1 (pp) Q9CQC7" source="4334" target="4432" cy:directed="1"/>
      <edge id="6945" label="Q9CXZ1 (pp) Q9CQZ5" source="4334" target="4144" cy:directed="1"/>
      <edge id="6944" label="Q9CXZ1 (pp) Q9CPP6" source="4334" target="4219" cy:directed="1"/>
      <edge id="6943" label="Q60676 (pp) P35438" source="4333" target="4153" cy:directed="1"/>
      <edge id="6942" label="Q60676 (pp) P63330" source="4333" target="4167" cy:directed="1"/>
      <edge id="6941" label="Q8JZN5 (pp) Q61425" source="4332" target="4252" cy:directed="1"/>
      <edge id="6940" label="Q8JZN5 (pp) Q8BMS1" source="4332" target="4454" cy:directed="1"/>
      <edge id="6939" label="Q8JZN5 (pp) Q99LC5" source="4332" target="4253" cy:directed="1"/>
      <edge id="6938" label="Q8JZQ2 (pp) P63038" source="4331" target="4185" cy:directed="1"/>
      <edge id="6937" label="Q8JZQ2 (pp) P00493" source="4331" target="4538" cy:directed="1"/>
      <edge id="6936" label="Q8JZQ2 (pp) Q68FF6" source="4331" target="4521" cy:directed="1"/>
      <edge id="6935" label="P51174 (pp) Q99LC5" source="4330" target="4253" cy:directed="1"/>
      <edge id="6934" label="P51174 (pp) Q8BMS1" source="4330" target="4454" cy:directed="1"/>
      <edge id="6933" label="P51174 (pp) Q91WC3" source="4330" target="4560" cy:directed="1"/>
      <edge id="6932" label="P51174 (pp) Q8BWT1" source="4330" target="4249" cy:directed="1"/>
      <edge id="6931" label="P51174 (pp) Q921G7" source="4330" target="4248" cy:directed="1"/>
      <edge id="6930" label="P51174 (pp) P41216" source="4330" target="4566" cy:directed="1"/>
      <edge id="6929" label="P51174 (pp) Q61425" source="4330" target="4252" cy:directed="1"/>
      <edge id="6928" label="P51174 (pp) Q8BGD5" source="4330" target="4456" cy:directed="1"/>
      <edge id="6927" label="P51174 (pp) Q99JY0" source="4330" target="4322" cy:directed="1"/>
      <edge id="6926" label="Q8VDD5 (pp) P35438" source="4329" target="4153" cy:directed="1"/>
      <edge id="6925" label="Q8VDD5 (pp) P63101" source="4329" target="4417" cy:directed="1"/>
      <edge id="6924" label="Q8VDD5 (pp) Q01097" source="4329" target="4142" cy:directed="1"/>
      <edge id="6923" label="P18872 (pp) P12023" source="4328" target="4263" cy:directed="1"/>
      <edge id="6922" label="P18872 (pp) P62874" source="4328" target="4299" cy:directed="1"/>
      <edge id="6921" label="P18872 (pp) P06151" source="4328" target="4176" cy:directed="1"/>
      <edge id="6920" label="Q9CQ75 (pp) Q9CPP6" source="4327" target="4219" cy:directed="1"/>
      <edge id="6919" label="Q9CQ75 (pp) Q91VD9" source="4327" target="4203" cy:directed="1"/>
      <edge id="6918" label="Q9CQ75 (pp) Q9CQJ8" source="4327" target="4208" cy:directed="1"/>
      <edge id="6917" label="Q9CQ75 (pp) Q8K3J1" source="4327" target="4342" cy:directed="1"/>
      <edge id="6916" label="Q9CQ75 (pp) Q9CQZ5" source="4327" target="4144" cy:directed="1"/>
      <edge id="6915" label="Q9CQ75 (pp) Q9DC69" source="4327" target="4345" cy:directed="1"/>
      <edge id="6914" label="Q9CQ75 (pp) Q9CPQ1" source="4327" target="4542" cy:directed="1"/>
      <edge id="6913" label="Q9CQ75 (pp) Q9D3D9" source="4327" target="4148" cy:directed="1"/>
      <edge id="6912" label="Q9CQ75 (pp) Q9D6J6" source="4327" target="4145" cy:directed="1"/>
      <edge id="6911" label="Q9CQ75 (pp) Q9CXZ1" source="4327" target="4334" cy:directed="1"/>
      <edge id="6910" label="Q9CQ75 (pp) Q7TMF3" source="4327" target="4303" cy:directed="1"/>
      <edge id="6909" label="Q9CQ75 (pp) Q9D6J5" source="4327" target="4425" cy:directed="1"/>
      <edge id="6908" label="Q9CQ75 (pp) Q99LC3" source="4327" target="4189" cy:directed="1"/>
      <edge id="6907" label="Q9CQ75 (pp) Q3UIU2" source="4327" target="4226" cy:directed="1"/>
      <edge id="6906" label="Q9CQ75 (pp) Q9CR68" source="4327" target="4205" cy:directed="1"/>
      <edge id="6905" label="Q9CQ75 (pp) Q9ERS2" source="4327" target="4277" cy:directed="1"/>
      <edge id="6904" label="Q9CQ75 (pp) P43024" source="4327" target="4410" cy:directed="1"/>
      <edge id="6903" label="Q9CQ75 (pp) Q62425" source="4327" target="4483" cy:directed="1"/>
      <edge id="6902" label="Q9CQ75 (pp) Q9CQH3" source="4327" target="4178" cy:directed="1"/>
      <edge id="6901" label="Q9CQ75 (pp) Q9D0M3" source="4327" target="4188" cy:directed="1"/>
      <edge id="6900" label="Q9CQ75 (pp) Q9Z1P6" source="4327" target="4237" cy:directed="1"/>
      <edge id="6899" label="Q9CQ75 (pp) P56391" source="4327" target="4269" cy:directed="1"/>
      <edge id="6898" label="Q9CQ75 (pp) Q9CQ69" source="4327" target="4172" cy:directed="1"/>
      <edge id="6897" label="Q9CQ75 (pp) Q9DCX2" source="4327" target="4304" cy:directed="1"/>
      <edge id="6896" label="Q9CQ75 (pp) Q9CQZ6" source="4327" target="4169" cy:directed="1"/>
      <edge id="6895" label="Q9CQ75 (pp) Q99LY9" source="4327" target="4190" cy:directed="1"/>
      <edge id="6894" label="Q9CQ75 (pp) Q9DCJ5" source="4327" target="4318" cy:directed="1"/>
      <edge id="6893" label="Q9CQ75 (pp) Q9CQ54" source="4327" target="4170" cy:directed="1"/>
      <edge id="6892" label="Q9CQ75 (pp) Q9CQC7" source="4327" target="4432" cy:directed="1"/>
      <edge id="6891" label="Q9CQ75 (pp) O09111" source="4327" target="4149" cy:directed="1"/>
      <edge id="6890" label="Q9CQ75 (pp) Q9DCS9" source="4327" target="4204" cy:directed="1"/>
      <edge id="6889" label="Q9CQ75 (pp) P97450" source="4327" target="4368" cy:directed="1"/>
      <edge id="6888" label="Q9CQ75 (pp) Q9D855" source="4327" target="4341" cy:directed="1"/>
      <edge id="6887" label="Q9CQ75 (pp) Q9DB20" source="4327" target="4177" cy:directed="1"/>
      <edge id="6886" label="Q9CQ75 (pp) Q91YT0" source="4327" target="4317" cy:directed="1"/>
      <edge id="6885" label="Q9CQ75 (pp) P52503" source="4327" target="4290" cy:directed="1"/>
      <edge id="6884" label="Q9CQ75 (pp) Q9DC70" source="4327" target="4210" cy:directed="1"/>
      <edge id="6883" label="P03930 (pp) Q9CQQ7" source="4326" target="4347" cy:directed="1"/>
      <edge id="6882" label="P03930 (pp) Q91VR2" source="4326" target="4201" cy:directed="1"/>
      <edge id="6881" label="P03930 (pp) Q9D3D9" source="4326" target="4148" cy:directed="1"/>
      <edge id="6880" label="P49615 (pp) P19246" source="4325" target="4596" cy:directed="1"/>
      <edge id="6879" label="P39688 (pp) Q60631" source="4324" target="4291" cy:directed="1"/>
      <edge id="6878" label="P39688 (pp) P30999" source="4324" target="4522" cy:directed="1"/>
      <edge id="6877" label="P39688 (pp) P18052" source="4324" target="4352" cy:directed="1"/>
      <edge id="6876" label="P39688 (pp) P49615" source="4324" target="4325" cy:directed="1"/>
      <edge id="6875" label="P04925 (pp) P62259" source="4323" target="4163" cy:directed="1"/>
      <edge id="6874" label="P04925 (pp) O35136" source="4323" target="4659" cy:directed="1"/>
      <edge id="6873" label="P04925 (pp) P11627" source="4323" target="4499" cy:directed="1"/>
      <edge id="6872" label="P04925 (pp) O08599" source="4323" target="4612" cy:directed="1"/>
      <edge id="6871" label="P04925 (pp) P63101" source="4323" target="4417" cy:directed="1"/>
      <edge id="6870" label="P04925 (pp) O88935" source="4323" target="4369" cy:directed="1"/>
      <edge id="6869" label="P04925 (pp) Q99PJ0" source="4323" target="4564" cy:directed="1"/>
      <edge id="6868" label="P04925 (pp) Q99N28" source="4323" target="4310" cy:directed="1"/>
      <edge id="6867" label="P04925 (pp) Q9Z218" source="4323" target="4506" cy:directed="1"/>
      <edge id="6866" label="P04925 (pp) Q8VDN2" source="4323" target="4422" cy:directed="1"/>
      <edge id="6865" label="Q99JY0 (pp) Q8BMS1" source="4322" target="4454" cy:directed="1"/>
      <edge id="6864" label="Q99JY0 (pp) Q9DBL1" source="4322" target="4389" cy:directed="1"/>
      <edge id="6863" label="O08756 (pp) Q8BMS1" source="4321" target="4454" cy:directed="1"/>
      <edge id="6862" label="O08756 (pp) Q9CQH3" source="4321" target="4178" cy:directed="1"/>
      <edge id="6861" label="O08756 (pp) O09111" source="4321" target="4149" cy:directed="1"/>
      <edge id="6860" label="O08756 (pp) Q99JY0" source="4321" target="4322" cy:directed="1"/>
      <edge id="6859" label="P28660 (pp) Q9JJV2" source="4320" target="4346" cy:directed="1"/>
      <edge id="6858" label="P60879 (pp) P63017" source="4319" target="4358" cy:directed="1"/>
      <edge id="6857" label="P60879 (pp) O55042" source="4319" target="4554" cy:directed="1"/>
      <edge id="6856" label="P60879 (pp) Q8K400" source="4319" target="4735" cy:directed="1"/>
      <edge id="6855" label="P60879 (pp) P63040" source="4319" target="4399" cy:directed="1"/>
      <edge id="6854" label="P60879 (pp) P61264" source="4319" target="4405" cy:directed="1"/>
      <edge id="6853" label="P60879 (pp) O08599" source="4319" target="4612" cy:directed="1"/>
      <edge id="6852" label="P60879 (pp) Q7TSJ2" source="4319" target="4658" cy:directed="1"/>
      <edge id="6851" label="P60879 (pp) P68368" source="4319" target="4470" cy:directed="1"/>
      <edge id="6850" label="P60879 (pp) P16858" source="4319" target="4497" cy:directed="1"/>
      <edge id="6849" label="P60879 (pp) Q9QWI6" source="4319" target="4418" cy:directed="1"/>
      <edge id="6848" label="P60879 (pp) P46096" source="4319" target="4628" cy:directed="1"/>
      <edge id="6847" label="P60879 (pp) P17426" source="4319" target="4229" cy:directed="1"/>
      <edge id="6846" label="P60879 (pp) Q62442" source="4319" target="4271" cy:directed="1"/>
      <edge id="6845" label="P60879 (pp) P47708" source="4319" target="4592" cy:directed="1"/>
      <edge id="6844" label="P60879 (pp) P63044" source="4319" target="4338" cy:directed="1"/>
      <edge id="6843" label="P60879 (pp) P51863" source="4319" target="4161" cy:directed="1"/>
      <edge id="6842" label="P60879 (pp) P06837" source="4319" target="4445" cy:directed="1"/>
      <edge id="6841" label="P60879 (pp) P28660" source="4319" target="4320" cy:directed="1"/>
      <edge id="6840" label="Q9DCJ5 (pp) O09111" source="4318" target="4149" cy:directed="1"/>
      <edge id="6839" label="Q9DCJ5 (pp) P56391" source="4318" target="4269" cy:directed="1"/>
      <edge id="6838" label="Q9DCJ5 (pp) Q99LY9" source="4318" target="4190" cy:directed="1"/>
      <edge id="6837" label="Q9DCJ5 (pp) Q91VR2" source="4318" target="4201" cy:directed="1"/>
      <edge id="6836" label="Q9DCJ5 (pp) Q9D6J6" source="4318" target="4145" cy:directed="1"/>
      <edge id="6835" label="Q9DCJ5 (pp) P99029" source="4318" target="4294" cy:directed="1"/>
      <edge id="6834" label="Q9DCJ5 (pp) O08756" source="4318" target="4321" cy:directed="1"/>
      <edge id="6833" label="Q9DCJ5 (pp) Q99LX0" source="4318" target="4255" cy:directed="1"/>
      <edge id="6832" label="Q9DCJ5 (pp) P67778" source="4318" target="4199" cy:directed="1"/>
      <edge id="6831" label="Q9DCJ5 (pp) Q9DCX2" source="4318" target="4304" cy:directed="1"/>
      <edge id="6830" label="Q9DCJ5 (pp) Q9CQH3" source="4318" target="4178" cy:directed="1"/>
      <edge id="6829" label="Q9DCJ5 (pp) Q9CPQ8" source="4318" target="4202" cy:directed="1"/>
      <edge id="6828" label="Q9DCJ5 (pp) Q9ERS2" source="4318" target="4277" cy:directed="1"/>
      <edge id="6827" label="Q9DCJ5 (pp) Q9CQQ7" source="4318" target="4347" cy:directed="1"/>
      <edge id="6826" label="Q9DCJ5 (pp) Q9DC69" source="4318" target="4345" cy:directed="1"/>
      <edge id="6825" label="Q9DCJ5 (pp) Q9D3D9" source="4318" target="4148" cy:directed="1"/>
      <edge id="6824" label="Q9DCJ5 (pp) Q3UIU2" source="4318" target="4226" cy:directed="1"/>
      <edge id="6823" label="Q9DCJ5 (pp) Q8K3J1" source="4318" target="4342" cy:directed="1"/>
      <edge id="6822" label="Q9DCJ5 (pp) P50516" source="4318" target="4231" cy:directed="1"/>
      <edge id="6821" label="Q91YT0 (pp) Q9WUM5" source="4317" target="4214" cy:directed="1"/>
      <edge id="6820" label="Q91YT0 (pp) Q8CAQ8" source="4317" target="4491" cy:directed="1"/>
      <edge id="6819" label="Q91YT0 (pp) Q9DCJ5" source="4317" target="4318" cy:directed="1"/>
      <edge id="6818" label="Q91YT0 (pp) Q99LX0" source="4317" target="4255" cy:directed="1"/>
      <edge id="6817" label="Q91YT0 (pp) Q9CQ69" source="4317" target="4172" cy:directed="1"/>
      <edge id="6816" label="Q91YT0 (pp) O09111" source="4317" target="4149" cy:directed="1"/>
      <edge id="6815" label="Q91YT0 (pp) Q8K3J1" source="4317" target="4342" cy:directed="1"/>
      <edge id="6814" label="Q91YT0 (pp) Q91VR2" source="4317" target="4201" cy:directed="1"/>
      <edge id="6813" label="Q91YT0 (pp) Q3UIU2" source="4317" target="4226" cy:directed="1"/>
      <edge id="6812" label="Q91YT0 (pp) Q9D2G2" source="4317" target="4225" cy:directed="1"/>
      <edge id="6811" label="Q91YT0 (pp) Q9DCS9" source="4317" target="4204" cy:directed="1"/>
      <edge id="6810" label="Q91YT0 (pp) Q9D3D9" source="4317" target="4148" cy:directed="1"/>
      <edge id="6809" label="Q91YT0 (pp) Q9ERS2" source="4317" target="4277" cy:directed="1"/>
      <edge id="6808" label="Q91YT0 (pp) Q60597" source="4317" target="4449" cy:directed="1"/>
      <edge id="6807" label="Q91YT0 (pp) Q9CR68" source="4317" target="4205" cy:directed="1"/>
      <edge id="6806" label="Q91YT0 (pp) Q9CQQ7" source="4317" target="4347" cy:directed="1"/>
      <edge id="6805" label="Q91YT0 (pp) Q9DCX2" source="4317" target="4304" cy:directed="1"/>
      <edge id="6804" label="Q91YT0 (pp) Q9DC69" source="4317" target="4345" cy:directed="1"/>
      <edge id="6803" label="Q91YT0 (pp) P70404" source="4317" target="4232" cy:directed="1"/>
      <edge id="6802" label="Q91YT0 (pp) Q9D6J6" source="4317" target="4145" cy:directed="1"/>
      <edge id="6801" label="Q91YT0 (pp) Q9CQH3" source="4317" target="4178" cy:directed="1"/>
      <edge id="6800" label="Q91YT0 (pp) Q06185" source="4317" target="4209" cy:directed="1"/>
      <edge id="6799" label="Q9JM76 (pp) P59999" source="4316" target="4430" cy:directed="1"/>
      <edge id="6798" label="Q9JM76 (pp) P68510" source="4316" target="4151" cy:directed="1"/>
      <edge id="6797" label="Q9JM76 (pp) Q9D898" source="4316" target="4359" cy:directed="1"/>
      <edge id="6796" label="Q9R0Q6 (pp) Q9CPW4" source="4315" target="4452" cy:directed="1"/>
      <edge id="6795" label="Q9R0Q6 (pp) P59999" source="4315" target="4430" cy:directed="1"/>
      <edge id="6794" label="Q9R0Q6 (pp) Q9JM76" source="4315" target="4316" cy:directed="1"/>
      <edge id="6793" label="Q68FD5 (pp) P17426" source="4314" target="4229" cy:directed="1"/>
      <edge id="6792" label="Q68FD5 (pp) Q62420" source="4314" target="4409" cy:directed="1"/>
      <edge id="6791" label="Q68FD5 (pp) P62962" source="4314" target="4380" cy:directed="1"/>
      <edge id="6790" label="Q68FD5 (pp) P35438" source="4314" target="4153" cy:directed="1"/>
      <edge id="6789" label="Q68FD5 (pp) Q6IRU5" source="4314" target="4475" cy:directed="1"/>
      <edge id="6788" label="Q68FD5 (pp) P63101" source="4314" target="4417" cy:directed="1"/>
      <edge id="6787" label="Q68FD5 (pp) Q80VP1" source="4314" target="4570" cy:directed="1"/>
      <edge id="6786" label="Q68FD5 (pp) O35643" source="4314" target="4617" cy:directed="1"/>
      <edge id="6785" label="Q68FD5 (pp) Q80TZ3" source="4314" target="4663" cy:directed="1"/>
      <edge id="6784" label="Q68FD5 (pp) Q9Z0R4" source="4314" target="4539" cy:directed="1"/>
      <edge id="6783" label="Q68FD5 (pp) O70589" source="4314" target="4502" cy:directed="1"/>
      <edge id="6782" label="Q68FD5 (pp) O08585" source="4314" target="4545" cy:directed="1"/>
      <edge id="6781" label="Q68FD5 (pp) P62743" source="4314" target="4595" cy:directed="1"/>
      <edge id="6780" label="Q68FD5 (pp) Q8CHC4" source="4314" target="4577" cy:directed="1"/>
      <edge id="6779" label="Q68FD5 (pp) Q01097" source="4314" target="4142" cy:directed="1"/>
      <edge id="6778" label="Q68FD5 (pp) Q8CHU3" source="4314" target="4429" cy:directed="1"/>
      <edge id="6777" label="Q68FD5 (pp) Q61548" source="4314" target="4356" cy:directed="1"/>
      <edge id="6776" label="Q68FD5 (pp) P62259" source="4314" target="4163" cy:directed="1"/>
      <edge id="6775" label="Q60864 (pp) P63038" source="4312" target="4185" cy:directed="1"/>
      <edge id="6774" label="Q60864 (pp) P04925" source="4312" target="4323" cy:directed="1"/>
      <edge id="6773" label="Q60864 (pp) Q9CR16" source="4312" target="4673" cy:directed="1"/>
      <edge id="6772" label="Q60864 (pp) P48722" source="4312" target="4640" cy:directed="1"/>
      <edge id="6771" label="Q60864 (pp) Q61699" source="4312" target="4656" cy:directed="1"/>
      <edge id="6770" label="Q60864 (pp) P63037" source="4312" target="4217" cy:directed="1"/>
      <edge id="6769" label="Q60864 (pp) P17156" source="4312" target="4516" cy:directed="1"/>
      <edge id="6768" label="Q60864 (pp) Q9QYJ0" source="4312" target="4313" cy:directed="1"/>
      <edge id="6767" label="P19536 (pp) P00405" source="4311" target="4607" cy:directed="1"/>
      <edge id="6766" label="P19536 (pp) Q91VR2" source="4311" target="4201" cy:directed="1"/>
      <edge id="6765" label="P19536 (pp) Q9CQH3" source="4311" target="4178" cy:directed="1"/>
      <edge id="6764" label="P19536 (pp) Q9CQ69" source="4311" target="4172" cy:directed="1"/>
      <edge id="6763" label="P19536 (pp) P56391" source="4311" target="4269" cy:directed="1"/>
      <edge id="6762" label="P19536 (pp) Q9D3D9" source="4311" target="4148" cy:directed="1"/>
      <edge id="6761" label="P19536 (pp) Q9CR68" source="4311" target="4205" cy:directed="1"/>
      <edge id="6760" label="Q9JLB0 (pp) O70318" source="4309" target="4535" cy:directed="1"/>
      <edge id="6759" label="Q9JLB0 (pp) Q8R5M8" source="4309" target="4266" cy:directed="1"/>
      <edge id="6758" label="Q9JLB0 (pp) Q99N28" source="4309" target="4310" cy:directed="1"/>
      <edge id="6757" label="Q8BVE3 (pp) Q9DC69" source="4308" target="4345" cy:directed="1"/>
      <edge id="6756" label="Q8BVE3 (pp) P50516" source="4308" target="4231" cy:directed="1"/>
      <edge id="6755" label="Q8BVE3 (pp) P63082" source="4308" target="4386" cy:directed="1"/>
      <edge id="6754" label="Q8BVE3 (pp) Q9Z1G4" source="4308" target="4213" cy:directed="1"/>
      <edge id="6753" label="Q8BVE3 (pp) P45878" source="4308" target="4357" cy:directed="1"/>
      <edge id="6752" label="P50518 (pp) P50516" source="4307" target="4231" cy:directed="1"/>
      <edge id="6751" label="P50518 (pp) Q9Z1G3" source="4307" target="4162" cy:directed="1"/>
      <edge id="6750" label="P50518 (pp) Q9WTT4" source="4307" target="4427" cy:directed="1"/>
      <edge id="6749" label="P50518 (pp) P57746" source="4307" target="4230" cy:directed="1"/>
      <edge id="6748" label="P50518 (pp) P63082" source="4307" target="4386" cy:directed="1"/>
      <edge id="6747" label="P50518 (pp) Q9Z1G4" source="4307" target="4213" cy:directed="1"/>
      <edge id="6746" label="P50518 (pp) Q8BVE3" source="4307" target="4308" cy:directed="1"/>
      <edge id="6745" label="Q61735 (pp) P97797" source="4305" target="4306" cy:directed="1"/>
      <edge id="6744" label="Q9DCX2 (pp) Q99LY9" source="4304" target="4190" cy:directed="1"/>
      <edge id="6743" label="Q9DCX2 (pp) Q9D3D9" source="4304" target="4148" cy:directed="1"/>
      <edge id="6742" label="Q9DCX2 (pp) Q9CQH3" source="4304" target="4178" cy:directed="1"/>
      <edge id="6741" label="Q9DCX2 (pp) Q9D6J6" source="4304" target="4145" cy:directed="1"/>
      <edge id="6740" label="Q9DCX2 (pp) Q9CQQ7" source="4304" target="4347" cy:directed="1"/>
      <edge id="6739" label="Q9DCX2 (pp) Q91VR2" source="4304" target="4201" cy:directed="1"/>
      <edge id="6738" label="Q9DCX2 (pp) Q99LX0" source="4304" target="4255" cy:directed="1"/>
      <edge id="6737" label="Q9DCX2 (pp) Q9ERS2" source="4304" target="4277" cy:directed="1"/>
      <edge id="6736" label="Q7TMF3 (pp) Q99LC3" source="4303" target="4189" cy:directed="1"/>
      <edge id="6735" label="Q7TMF3 (pp) Q91VD9" source="4303" target="4203" cy:directed="1"/>
      <edge id="6734" label="Q7TMF3 (pp) Q91YT0" source="4303" target="4317" cy:directed="1"/>
      <edge id="6733" label="Q7TMF3 (pp) Q9CQ69" source="4303" target="4172" cy:directed="1"/>
      <edge id="6732" label="Q7TMF3 (pp) Q9D6J6" source="4303" target="4145" cy:directed="1"/>
      <edge id="6731" label="Q7TMF3 (pp) Q9D3D9" source="4303" target="4148" cy:directed="1"/>
      <edge id="6730" label="Q7TMF3 (pp) Q9CQH3" source="4303" target="4178" cy:directed="1"/>
      <edge id="6729" label="Q7TMF3 (pp) Q9CQC7" source="4303" target="4432" cy:directed="1"/>
      <edge id="6728" label="Q7TMF3 (pp) Q8K3J1" source="4303" target="4342" cy:directed="1"/>
      <edge id="6727" label="Q7TMF3 (pp) Q99LY9" source="4303" target="4190" cy:directed="1"/>
      <edge id="6726" label="Q7TMF3 (pp) Q9D6J5" source="4303" target="4425" cy:directed="1"/>
      <edge id="6725" label="Q7TMF3 (pp) Q9CQJ8" source="4303" target="4208" cy:directed="1"/>
      <edge id="6724" label="Q7TMF3 (pp) Q9ERS2" source="4303" target="4277" cy:directed="1"/>
      <edge id="6723" label="Q7TMF3 (pp) Q3UIU2" source="4303" target="4226" cy:directed="1"/>
      <edge id="6722" label="Q7TMF3 (pp) Q9CQZ6" source="4303" target="4169" cy:directed="1"/>
      <edge id="6721" label="Q7TMF3 (pp) Q9DCJ5" source="4303" target="4318" cy:directed="1"/>
      <edge id="6720" label="Q7TMF3 (pp) Q9Z1P6" source="4303" target="4237" cy:directed="1"/>
      <edge id="6719" label="Q7TMF3 (pp) Q9CQQ7" source="4303" target="4347" cy:directed="1"/>
      <edge id="6718" label="Q7TMF3 (pp) Q9CQZ5" source="4303" target="4144" cy:directed="1"/>
      <edge id="6717" label="Q7TMF3 (pp) Q9DCS9" source="4303" target="4204" cy:directed="1"/>
      <edge id="6716" label="Q7TMF3 (pp) Q9DC70" source="4303" target="4210" cy:directed="1"/>
      <edge id="6715" label="Q7TMF3 (pp) Q9D855" source="4303" target="4341" cy:directed="1"/>
      <edge id="6714" label="Q7TMF3 (pp) P52503" source="4303" target="4290" cy:directed="1"/>
      <edge id="6713" label="Q7TMF3 (pp) P97450" source="4303" target="4368" cy:directed="1"/>
      <edge id="6712" label="Q7TMF3 (pp) Q9D0M3" source="4303" target="4188" cy:directed="1"/>
      <edge id="6711" label="Q7TMF3 (pp) Q62425" source="4303" target="4483" cy:directed="1"/>
      <edge id="6710" label="Q7TMF3 (pp) Q9DC69" source="4303" target="4345" cy:directed="1"/>
      <edge id="6709" label="Q7TMF3 (pp) Q9CQ54" source="4303" target="4170" cy:directed="1"/>
      <edge id="6708" label="Q7TMF3 (pp) Q9CR68" source="4303" target="4205" cy:directed="1"/>
      <edge id="6707" label="Q7TMF3 (pp) O09111" source="4303" target="4149" cy:directed="1"/>
      <edge id="6706" label="Q7TMF3 (pp) Q9CXZ1" source="4303" target="4334" cy:directed="1"/>
      <edge id="6705" label="Q7TMF3 (pp) Q9DCX2" source="4303" target="4304" cy:directed="1"/>
      <edge id="6704" label="O35658 (pp) Q9CQQ7" source="4302" target="4347" cy:directed="1"/>
      <edge id="6703" label="O35658 (pp) P40630" source="4302" target="4532" cy:directed="1"/>
      <edge id="6702" label="Q99KR7 (pp) P56480" source="4301" target="4196" cy:directed="1"/>
      <edge id="6701" label="Q99KR7 (pp) O35658" source="4301" target="4302" cy:directed="1"/>
      <edge id="6700" label="P62874 (pp) P04925" source="4299" target="4323" cy:directed="1"/>
      <edge id="6699" label="P63213 (pp) P18872" source="4298" target="4328" cy:directed="1"/>
      <edge id="6698" label="P63213 (pp) P62874" source="4298" target="4299" cy:directed="1"/>
      <edge id="6697" label="P40142 (pp) P05063" source="4297" target="4450" cy:directed="1"/>
      <edge id="6696" label="P40142 (pp) Q9D0F9" source="4297" target="4573" cy:directed="1"/>
      <edge id="6695" label="P40142 (pp) P35486" source="4297" target="4377" cy:directed="1"/>
      <edge id="6694" label="P40142 (pp) P17182" source="4297" target="4453" cy:directed="1"/>
      <edge id="6693" label="P40142 (pp) P06151" source="4297" target="4176" cy:directed="1"/>
      <edge id="6692" label="P40142 (pp) P05064" source="4297" target="4259" cy:directed="1"/>
      <edge id="6691" label="P40142 (pp) P17751" source="4297" target="4235" cy:directed="1"/>
      <edge id="6690" label="P40142 (pp) P52480" source="4297" target="4393" cy:directed="1"/>
      <edge id="6689" label="P40142 (pp) Q60597" source="4297" target="4449" cy:directed="1"/>
      <edge id="6688" label="P40142 (pp) P16858" source="4297" target="4497" cy:directed="1"/>
      <edge id="6687" label="P40142 (pp) Q93092" source="4297" target="4392" cy:directed="1"/>
      <edge id="6686" label="P40142 (pp) P06745" source="4297" target="4402" cy:directed="1"/>
      <edge id="6685" label="P40142 (pp) Q9DCD0" source="4297" target="4160" cy:directed="1"/>
      <edge id="6684" label="P40142 (pp) P09411" source="4297" target="4236" cy:directed="1"/>
      <edge id="6683" label="Q9CQR4 (pp) Q61425" source="4296" target="4252" cy:directed="1"/>
      <edge id="6682" label="Q9CQR4 (pp) Q99LC5" source="4296" target="4253" cy:directed="1"/>
      <edge id="6681" label="Q9CQR4 (pp) Q9DCJ5" source="4296" target="4318" cy:directed="1"/>
      <edge id="6680" label="Q9CQR4 (pp) Q9CQZ5" source="4296" target="4144" cy:directed="1"/>
      <edge id="6679" label="Q9CQR4 (pp) Q9CQZ6" source="4296" target="4169" cy:directed="1"/>
      <edge id="6678" label="Q9CQR4 (pp) Q9DCD0" source="4296" target="4160" cy:directed="1"/>
      <edge id="6677" label="Q9CQR4 (pp) Q9D6J6" source="4296" target="4145" cy:directed="1"/>
      <edge id="6676" label="Q9CQR4 (pp) P97450" source="4296" target="4368" cy:directed="1"/>
      <edge id="6675" label="Q9CQR4 (pp) Q9CQH3" source="4296" target="4178" cy:directed="1"/>
      <edge id="6674" label="Q9CQV8 (pp) P10637" source="4295" target="4472" cy:directed="1"/>
      <edge id="6673" label="Q9CQV8 (pp) Q64010" source="4295" target="4367" cy:directed="1"/>
      <edge id="6672" label="Q9CQV8 (pp) P16054" source="4295" target="4381" cy:directed="1"/>
      <edge id="6671" label="Q9CQV8 (pp) P63101" source="4295" target="4417" cy:directed="1"/>
      <edge id="6670" label="Q9CQV8 (pp) P62259" source="4295" target="4163" cy:directed="1"/>
      <edge id="6669" label="P99029 (pp) Q9D6J6" source="4294" target="4145" cy:directed="1"/>
      <edge id="6668" label="P62073 (pp) Q9CQH3" source="4293" target="4178" cy:directed="1"/>
      <edge id="6667" label="P62073 (pp) Q9D6J6" source="4293" target="4145" cy:directed="1"/>
      <edge id="6666" label="P62073 (pp) P67778" source="4293" target="4199" cy:directed="1"/>
      <edge id="6665" label="P62073 (pp) Q9DCS9" source="4293" target="4204" cy:directed="1"/>
      <edge id="6664" label="P62073 (pp) Q9D3D9" source="4293" target="4148" cy:directed="1"/>
      <edge id="6663" label="P62073 (pp) Q9CR68" source="4293" target="4205" cy:directed="1"/>
      <edge id="6662" label="P62073 (pp) O35658" source="4293" target="4302" cy:directed="1"/>
      <edge id="6661" label="P62073 (pp) P56391" source="4293" target="4269" cy:directed="1"/>
      <edge id="6660" label="P62073 (pp) Q9DCJ5" source="4293" target="4318" cy:directed="1"/>
      <edge id="6659" label="P62073 (pp) Q925I1" source="4293" target="4527" cy:directed="1"/>
      <edge id="6658" label="P62073 (pp) Q9ERS2" source="4293" target="4277" cy:directed="1"/>
      <edge id="6657" label="P62073 (pp) O08756" source="4293" target="4321" cy:directed="1"/>
      <edge id="6656" label="P62073 (pp) P99029" source="4293" target="4294" cy:directed="1"/>
      <edge id="6655" label="Q62277 (pp) P43006" source="4292" target="4711" cy:directed="1"/>
      <edge id="6654" label="Q62277 (pp) P01831" source="4292" target="4557" cy:directed="1"/>
      <edge id="6653" label="Q62277 (pp) P63044" source="4292" target="4338" cy:directed="1"/>
      <edge id="6652" label="Q62277 (pp) P46096" source="4292" target="4628" cy:directed="1"/>
      <edge id="6651" label="Q62277 (pp) P62204" source="4292" target="4517" cy:directed="1"/>
      <edge id="6650" label="Q62277 (pp) P60879" source="4292" target="4319" cy:directed="1"/>
      <edge id="6649" label="Q60631 (pp) Q68FD5" source="4291" target="4314" cy:directed="1"/>
      <edge id="6648" label="Q60631 (pp) P39053" source="4291" target="4435" cy:directed="1"/>
      <edge id="6647" label="Q60631 (pp) Q8CHC4" source="4291" target="4577" cy:directed="1"/>
      <edge id="6646" label="Q60631 (pp) P05480" source="4291" target="4282" cy:directed="1"/>
      <edge id="6645" label="Q60631 (pp) O08585" source="4291" target="4545" cy:directed="1"/>
      <edge id="6644" label="Q60631 (pp) P12023" source="4291" target="4263" cy:directed="1"/>
      <edge id="6643" label="Q60631 (pp) P20444" source="4291" target="4614" cy:directed="1"/>
      <edge id="6642" label="Q60631 (pp) P04925" source="4291" target="4323" cy:directed="1"/>
      <edge id="6641" label="Q60631 (pp) P18052" source="4291" target="4352" cy:directed="1"/>
      <edge id="6640" label="Q60631 (pp) Q62420" source="4291" target="4409" cy:directed="1"/>
      <edge id="6639" label="Q60631 (pp) Q62277" source="4291" target="4292" cy:directed="1"/>
      <edge id="6638" label="P52503 (pp) Q9Z1P6" source="4290" target="4237" cy:directed="1"/>
      <edge id="6637" label="P52503 (pp) Q9CQ69" source="4290" target="4172" cy:directed="1"/>
      <edge id="6636" label="P52503 (pp) O09111" source="4290" target="4149" cy:directed="1"/>
      <edge id="6635" label="P52503 (pp) O08756" source="4290" target="4321" cy:directed="1"/>
      <edge id="6634" label="P52503 (pp) Q9D3D9" source="4290" target="4148" cy:directed="1"/>
      <edge id="6633" label="P52503 (pp) Q9DCS9" source="4290" target="4204" cy:directed="1"/>
      <edge id="6632" label="P52503 (pp) Q99LY9" source="4290" target="4190" cy:directed="1"/>
      <edge id="6631" label="P52503 (pp) Q9CPP6" source="4290" target="4219" cy:directed="1"/>
      <edge id="6630" label="P52503 (pp) P17665" source="4290" target="4493" cy:directed="1"/>
      <edge id="6629" label="P52503 (pp) Q9CQ54" source="4290" target="4170" cy:directed="1"/>
      <edge id="6628" label="P52503 (pp) Q06185" source="4290" target="4209" cy:directed="1"/>
      <edge id="6627" label="P52503 (pp) Q9ERS2" source="4290" target="4277" cy:directed="1"/>
      <edge id="6626" label="P52503 (pp) P99029" source="4290" target="4294" cy:directed="1"/>
      <edge id="6625" label="P52503 (pp) Q9D6J5" source="4290" target="4425" cy:directed="1"/>
      <edge id="6624" label="P52503 (pp) Q9CQC7" source="4290" target="4432" cy:directed="1"/>
      <edge id="6623" label="P52503 (pp) Q9D0M3" source="4290" target="4188" cy:directed="1"/>
      <edge id="6622" label="P52503 (pp) Q9CXZ1" source="4290" target="4334" cy:directed="1"/>
      <edge id="6621" label="P52503 (pp) Q9DCJ5" source="4290" target="4318" cy:directed="1"/>
      <edge id="6620" label="P52503 (pp) Q99LX0" source="4290" target="4255" cy:directed="1"/>
      <edge id="6619" label="P52503 (pp) P97450" source="4290" target="4368" cy:directed="1"/>
      <edge id="6618" label="P52503 (pp) Q99LC3" source="4290" target="4189" cy:directed="1"/>
      <edge id="6617" label="P52503 (pp) Q9DB20" source="4290" target="4177" cy:directed="1"/>
      <edge id="6616" label="P52503 (pp) P56391" source="4290" target="4269" cy:directed="1"/>
      <edge id="6615" label="P52503 (pp) Q9CR68" source="4290" target="4205" cy:directed="1"/>
      <edge id="6614" label="P52503 (pp) Q9CQH3" source="4290" target="4178" cy:directed="1"/>
      <edge id="6613" label="P52503 (pp) Q9CQJ8" source="4290" target="4208" cy:directed="1"/>
      <edge id="6612" label="P52503 (pp) Q9CQQ7" source="4290" target="4347" cy:directed="1"/>
      <edge id="6611" label="P52503 (pp) Q8K3J1" source="4290" target="4342" cy:directed="1"/>
      <edge id="6610" label="P52503 (pp) Q9DC69" source="4290" target="4345" cy:directed="1"/>
      <edge id="6609" label="P52503 (pp) P62073" source="4290" target="4293" cy:directed="1"/>
      <edge id="6608" label="P52503 (pp) P43024" source="4290" target="4410" cy:directed="1"/>
      <edge id="6607" label="P52503 (pp) P42125" source="4290" target="4457" cy:directed="1"/>
      <edge id="6606" label="P52503 (pp) Q9CQZ5" source="4290" target="4144" cy:directed="1"/>
      <edge id="6605" label="P52503 (pp) Q91VD9" source="4290" target="4203" cy:directed="1"/>
      <edge id="6604" label="P52503 (pp) Q9CZ13" source="4290" target="4187" cy:directed="1"/>
      <edge id="6603" label="P52503 (pp) Q91YT0" source="4290" target="4317" cy:directed="1"/>
      <edge id="6602" label="P52503 (pp) Q9CQZ6" source="4290" target="4169" cy:directed="1"/>
      <edge id="6601" label="P52503 (pp) P48771" source="4290" target="4241" cy:directed="1"/>
      <edge id="6600" label="P52503 (pp) Q9D6J6" source="4290" target="4145" cy:directed="1"/>
      <edge id="6599" label="Q8R4N0 (pp) Q99LC5" source="4289" target="4253" cy:directed="1"/>
      <edge id="6598" label="Q8R4N0 (pp) Q9WUM5" source="4289" target="4214" cy:directed="1"/>
      <edge id="6597" label="Q8R4N0 (pp) P05480" source="4289" target="4282" cy:directed="1"/>
      <edge id="6596" label="Q8R4N0 (pp) Q99MR8" source="4289" target="4563" cy:directed="1"/>
      <edge id="6595" label="Q8R4N0 (pp) Q91ZA3" source="4289" target="4415" cy:directed="1"/>
      <edge id="6594" label="Q3ULD5 (pp) Q05920" source="4288" target="4192" cy:directed="1"/>
      <edge id="6593" label="Q3ULD5 (pp) Q9D0K2" source="4288" target="4215" cy:directed="1"/>
      <edge id="6592" label="Q3ULD5 (pp) Q99MR8" source="4288" target="4563" cy:directed="1"/>
      <edge id="6591" label="Q3ULD5 (pp) Q91ZA3" source="4288" target="4415" cy:directed="1"/>
      <edge id="6590" label="Q3ULD5 (pp) Q8BH95" source="4288" target="4186" cy:directed="1"/>
      <edge id="6589" label="Q3ULD5 (pp) Q8BMS1" source="4288" target="4454" cy:directed="1"/>
      <edge id="6588" label="Q3ULD5 (pp) Q921G7" source="4288" target="4248" cy:directed="1"/>
      <edge id="6587" label="Q3ULD5 (pp) Q9JHI5" source="4288" target="4391" cy:directed="1"/>
      <edge id="6586" label="Q3ULD5 (pp) Q99MN9" source="4288" target="4372" cy:directed="1"/>
      <edge id="6585" label="Q3ULD5 (pp) Q8R4N0" source="4288" target="4289" cy:directed="1"/>
      <edge id="6584" label="Q8VEM8 (pp) Q9D3D9" source="4287" target="4148" cy:directed="1"/>
      <edge id="6583" label="Q8VEM8 (pp) Q9CQQ7" source="4287" target="4347" cy:directed="1"/>
      <edge id="6582" label="Q8VEM8 (pp) Q9CQH3" source="4287" target="4178" cy:directed="1"/>
      <edge id="6581" label="Q8VEM8 (pp) Q9D6J6" source="4287" target="4145" cy:directed="1"/>
      <edge id="6580" label="P68369 (pp) P60879" source="4286" target="4319" cy:directed="1"/>
      <edge id="6579" label="P68369 (pp) P35438" source="4286" target="4153" cy:directed="1"/>
      <edge id="6578" label="P68369 (pp) P63101" source="4286" target="4417" cy:directed="1"/>
      <edge id="6577" label="P68369 (pp) P27546" source="4286" target="4603" cy:directed="1"/>
      <edge id="6576" label="P68369 (pp) P39053" source="4286" target="4435" cy:directed="1"/>
      <edge id="6575" label="Q8K2B3 (pp) Q99JY0" source="4285" target="4322" cy:directed="1"/>
      <edge id="6574" label="Q8K2B3 (pp) P58281" source="4285" target="4602" cy:directed="1"/>
      <edge id="6573" label="Q8K2B3 (pp) P17751" source="4285" target="4235" cy:directed="1"/>
      <edge id="6572" label="Q8K2B3 (pp) Q91VD9" source="4285" target="4203" cy:directed="1"/>
      <edge id="6571" label="Q8K2B3 (pp) Q9D6R2" source="4285" target="4174" cy:directed="1"/>
      <edge id="6570" label="Q8K2B3 (pp) P63038" source="4285" target="4185" cy:directed="1"/>
      <edge id="6569" label="Q8K2B3 (pp) Q8K3J1" source="4285" target="4342" cy:directed="1"/>
      <edge id="6568" label="Q8K2B3 (pp) P35486" source="4285" target="4377" cy:directed="1"/>
      <edge id="6567" label="Q8K2B3 (pp) Q9DB77" source="4285" target="4343" cy:directed="1"/>
      <edge id="6566" label="Q8K2B3 (pp) Q9D6J6" source="4285" target="4145" cy:directed="1"/>
      <edge id="6565" label="Q8K2B3 (pp) Q9DC69" source="4285" target="4345" cy:directed="1"/>
      <edge id="6564" label="Q8K2B3 (pp) Q9CZ13" source="4285" target="4187" cy:directed="1"/>
      <edge id="6563" label="Q8K2B3 (pp) Q9CR68" source="4285" target="4205" cy:directed="1"/>
      <edge id="6562" label="Q8K2B3 (pp) Q99LC5" source="4285" target="4253" cy:directed="1"/>
      <edge id="6561" label="Q8K2B3 (pp) Q9WUM5" source="4285" target="4214" cy:directed="1"/>
      <edge id="6560" label="Q8K2B3 (pp) P56480" source="4285" target="4196" cy:directed="1"/>
      <edge id="6559" label="Q8K2B3 (pp) Q60597" source="4285" target="4449" cy:directed="1"/>
      <edge id="6558" label="Q8K2B3 (pp) P00493" source="4285" target="4538" cy:directed="1"/>
      <edge id="6557" label="Q8K2B3 (pp) Q9Z2I9" source="4285" target="4396" cy:directed="1"/>
      <edge id="6556" label="Q8K2B3 (pp) Q91YT0" source="4285" target="4317" cy:directed="1"/>
      <edge id="6555" label="Q8K2B3 (pp) P09411" source="4285" target="4236" cy:directed="1"/>
      <edge id="6554" label="Q8K2B3 (pp) Q99KI0" source="4285" target="4276" cy:directed="1"/>
      <edge id="6553" label="Q8K2B3 (pp) Q9CQQ7" source="4285" target="4347" cy:directed="1"/>
      <edge id="6552" label="Q8K2B3 (pp) Q9CPP6" source="4285" target="4219" cy:directed="1"/>
      <edge id="6551" label="Q8K2B3 (pp) P52196" source="4285" target="4206" cy:directed="1"/>
      <edge id="6550" label="Q8K2B3 (pp) Q03265" source="4285" target="4150" cy:directed="1"/>
      <edge id="6549" label="Q8K2B3 (pp) Q9D051" source="4285" target="4147" cy:directed="1"/>
      <edge id="6548" label="Q8K2B3 (pp) Q9Z0X1" source="4285" target="4488" cy:directed="1"/>
      <edge id="6547" label="Q8K2B3 (pp) Q9D2G2" source="4285" target="4225" cy:directed="1"/>
      <edge id="6546" label="Q8K2B3 (pp) Q91VR2" source="4285" target="4201" cy:directed="1"/>
      <edge id="6545" label="Q8K2B3 (pp) Q9D0M3" source="4285" target="4188" cy:directed="1"/>
      <edge id="6544" label="Q8K2B3 (pp) Q8VEM8" source="4285" target="4287" cy:directed="1"/>
      <edge id="6543" label="Q8K2B3 (pp) Q8JZQ2" source="4285" target="4331" cy:directed="1"/>
      <edge id="6542" label="Q8K2B3 (pp) P97807" source="4285" target="4278" cy:directed="1"/>
      <edge id="6541" label="Q91WD5 (pp) Q9CPP6" source="4284" target="4219" cy:directed="1"/>
      <edge id="6540" label="Q91WD5 (pp) Q99LY9" source="4284" target="4190" cy:directed="1"/>
      <edge id="6539" label="Q91WD5 (pp) Q91YT0" source="4284" target="4317" cy:directed="1"/>
      <edge id="6538" label="Q91WD5 (pp) Q9DC69" source="4284" target="4345" cy:directed="1"/>
      <edge id="6537" label="Q91WD5 (pp) Q9WUM5" source="4284" target="4214" cy:directed="1"/>
      <edge id="6536" label="Q91WD5 (pp) P35486" source="4284" target="4377" cy:directed="1"/>
      <edge id="6535" label="Q91WD5 (pp) Q91VD9" source="4284" target="4203" cy:directed="1"/>
      <edge id="6534" label="Q91WD5 (pp) P09411" source="4284" target="4236" cy:directed="1"/>
      <edge id="6533" label="Q91WD5 (pp) Q9DB20" source="4284" target="4177" cy:directed="1"/>
      <edge id="6532" label="Q91WD5 (pp) Q9CZ13" source="4284" target="4187" cy:directed="1"/>
      <edge id="6531" label="Q91WD5 (pp) Q99LC5" source="4284" target="4253" cy:directed="1"/>
      <edge id="6530" label="Q91WD5 (pp) Q8BH95" source="4284" target="4186" cy:directed="1"/>
      <edge id="6529" label="Q91WD5 (pp) P17751" source="4284" target="4235" cy:directed="1"/>
      <edge id="6528" label="Q91WD5 (pp) P52503" source="4284" target="4290" cy:directed="1"/>
      <edge id="6527" label="Q91WD5 (pp) Q8K1Z0" source="4284" target="4257" cy:directed="1"/>
      <edge id="6526" label="Q91WD5 (pp) Q9ERS2" source="4284" target="4277" cy:directed="1"/>
      <edge id="6525" label="Q91WD5 (pp) Q9CQ75" source="4284" target="4327" cy:directed="1"/>
      <edge id="6524" label="Q91WD5 (pp) Q9D6J5" source="4284" target="4425" cy:directed="1"/>
      <edge id="6523" label="Q91WD5 (pp) Q8K3J1" source="4284" target="4342" cy:directed="1"/>
      <edge id="6522" label="Q91WD5 (pp) P56480" source="4284" target="4196" cy:directed="1"/>
      <edge id="6521" label="Q91WD5 (pp) Q6PB66" source="4284" target="4436" cy:directed="1"/>
      <edge id="6520" label="Q91WD5 (pp) Q8CAQ8" source="4284" target="4491" cy:directed="1"/>
      <edge id="6519" label="Q91WD5 (pp) Q7TMF3" source="4284" target="4303" cy:directed="1"/>
      <edge id="6518" label="Q91WD5 (pp) Q03265" source="4284" target="4150" cy:directed="1"/>
      <edge id="6517" label="Q91WD5 (pp) Q8BGH2" source="4284" target="4254" cy:directed="1"/>
      <edge id="6516" label="Q91WD5 (pp) P20108" source="4284" target="4365" cy:directed="1"/>
      <edge id="6515" label="Q91WD5 (pp) Q3ULD5" source="4284" target="4288" cy:directed="1"/>
      <edge id="6514" label="Q91WD5 (pp) Q9CR68" source="4284" target="4205" cy:directed="1"/>
      <edge id="6513" label="Q91WD5 (pp) Q9DCS9" source="4284" target="4204" cy:directed="1"/>
      <edge id="6512" label="Q91WD5 (pp) Q9D6J6" source="4284" target="4145" cy:directed="1"/>
      <edge id="6511" label="Q91WD5 (pp) Q9CXZ1" source="4284" target="4334" cy:directed="1"/>
      <edge id="6510" label="Q91WD5 (pp) Q9DB77" source="4284" target="4343" cy:directed="1"/>
      <edge id="6509" label="Q91WD5 (pp) Q9CQJ8" source="4284" target="4208" cy:directed="1"/>
      <edge id="6508" label="Q91WD5 (pp) Q9CQC7" source="4284" target="4432" cy:directed="1"/>
      <edge id="6507" label="Q91WD5 (pp) P97450" source="4284" target="4368" cy:directed="1"/>
      <edge id="6506" label="Q91WD5 (pp) Q9CQZ5" source="4284" target="4144" cy:directed="1"/>
      <edge id="6505" label="Q91WD5 (pp) Q99LC3" source="4284" target="4189" cy:directed="1"/>
      <edge id="6504" label="Q91WD5 (pp) Q99LX0" source="4284" target="4255" cy:directed="1"/>
      <edge id="6503" label="Q91WD5 (pp) Q9CQQ7" source="4284" target="4347" cy:directed="1"/>
      <edge id="6502" label="Q91WD5 (pp) P97807" source="4284" target="4278" cy:directed="1"/>
      <edge id="6501" label="Q91WD5 (pp) Q9DC70" source="4284" target="4210" cy:directed="1"/>
      <edge id="6500" label="Q91WD5 (pp) Q9CQH3" source="4284" target="4178" cy:directed="1"/>
      <edge id="6499" label="Q91WD5 (pp) Q9D855" source="4284" target="4341" cy:directed="1"/>
      <edge id="6498" label="Q91WD5 (pp) Q9CQ69" source="4284" target="4172" cy:directed="1"/>
      <edge id="6497" label="Q91WD5 (pp) Q91VR2" source="4284" target="4201" cy:directed="1"/>
      <edge id="6496" label="Q91WD5 (pp) Q99JY0" source="4284" target="4322" cy:directed="1"/>
      <edge id="6495" label="Q91WD5 (pp) Q99KI0" source="4284" target="4276" cy:directed="1"/>
      <edge id="6494" label="Q91WD5 (pp) Q9D0M3" source="4284" target="4188" cy:directed="1"/>
      <edge id="6493" label="Q91WD5 (pp) Q8VEM8" source="4284" target="4287" cy:directed="1"/>
      <edge id="6492" label="Q91WD5 (pp) P70404" source="4284" target="4232" cy:directed="1"/>
      <edge id="6491" label="Q91WD5 (pp) P08249" source="4284" target="4173" cy:directed="1"/>
      <edge id="6490" label="Q91WD5 (pp) Q9DCJ5" source="4284" target="4318" cy:directed="1"/>
      <edge id="6489" label="Q91WD5 (pp) Q99MN9" source="4284" target="4372" cy:directed="1"/>
      <edge id="6488" label="Q91WD5 (pp) Q9CQZ6" source="4284" target="4169" cy:directed="1"/>
      <edge id="6487" label="Q91WD5 (pp) Q8K2B3" source="4284" target="4285" cy:directed="1"/>
      <edge id="6486" label="P51881 (pp) P16054" source="4283" target="4381" cy:directed="1"/>
      <edge id="6485" label="P51881 (pp) P62259" source="4283" target="4163" cy:directed="1"/>
      <edge id="6484" label="P05480 (pp) P23242" source="4282" target="4670" cy:directed="1"/>
      <edge id="6483" label="P05480 (pp) P30999" source="4282" target="4522" cy:directed="1"/>
      <edge id="6482" label="P05480 (pp) P39053" source="4282" target="4435" cy:directed="1"/>
      <edge id="6481" label="P05480 (pp) P35438" source="4282" target="4153" cy:directed="1"/>
      <edge id="6480" label="P05480 (pp) P35436" source="4282" target="4158" cy:directed="1"/>
      <edge id="6479" label="Q02248 (pp) P63001" source="4281" target="4336" cy:directed="1"/>
      <edge id="6478" label="Q02248 (pp) Q01097" source="4281" target="4142" cy:directed="1"/>
      <edge id="6477" label="Q02248 (pp) O88712" source="4281" target="4479" cy:directed="1"/>
      <edge id="6476" label="Q02248 (pp) Q68FH0" source="4281" target="4686" cy:directed="1"/>
      <edge id="6475" label="Q02248 (pp) P68510" source="4281" target="4151" cy:directed="1"/>
      <edge id="6474" label="Q02248 (pp) P39688" source="4281" target="4324" cy:directed="1"/>
      <edge id="6473" label="Q02248 (pp) P35438" source="4281" target="4153" cy:directed="1"/>
      <edge id="6472" label="Q02248 (pp) Q61301" source="4281" target="4395" cy:directed="1"/>
      <edge id="6471" label="Q02248 (pp) P05480" source="4281" target="4282" cy:directed="1"/>
      <edge id="6470" label="P60710 (pp) O70589" source="4280" target="4502" cy:directed="1"/>
      <edge id="6469" label="P60710 (pp) Q9JM76" source="4280" target="4316" cy:directed="1"/>
      <edge id="6468" label="P60710 (pp) Q9CPW4" source="4280" target="4452" cy:directed="1"/>
      <edge id="6467" label="P60710 (pp) P16054" source="4280" target="4381" cy:directed="1"/>
      <edge id="6466" label="P60710 (pp) P35438" source="4280" target="4153" cy:directed="1"/>
      <edge id="6465" label="P60710 (pp) Q9D898" source="4280" target="4359" cy:directed="1"/>
      <edge id="6464" label="P60710 (pp) P59999" source="4280" target="4430" cy:directed="1"/>
      <edge id="6463" label="P60710 (pp) Q9R0Q6" source="4280" target="4315" cy:directed="1"/>
      <edge id="6462" label="Q6PHZ2 (pp) P68369" source="4279" target="4286" cy:directed="1"/>
      <edge id="6461" label="Q6PHZ2 (pp) P63101" source="4279" target="4417" cy:directed="1"/>
      <edge id="6460" label="Q6PHZ2 (pp) P35436" source="4279" target="4158" cy:directed="1"/>
      <edge id="6459" label="Q6PHZ2 (pp) P99024" source="4279" target="4505" cy:directed="1"/>
      <edge id="6458" label="Q6PHZ2 (pp) P60710" source="4279" target="4280" cy:directed="1"/>
      <edge id="6457" label="P97807 (pp) P05202" source="4278" target="4154" cy:directed="1"/>
      <edge id="6456" label="P97807 (pp) Q60931" source="4278" target="4494" cy:directed="1"/>
      <edge id="6455" label="P97807 (pp) Q9CQH3" source="4278" target="4178" cy:directed="1"/>
      <edge id="6454" label="P97807 (pp) Q921G7" source="4278" target="4248" cy:directed="1"/>
      <edge id="6453" label="P97807 (pp) Q9CR68" source="4278" target="4205" cy:directed="1"/>
      <edge id="6452" label="P97807 (pp) Q61425" source="4278" target="4252" cy:directed="1"/>
      <edge id="6451" label="P97807 (pp) Q8BMF4" source="4278" target="4191" cy:directed="1"/>
      <edge id="6450" label="P97807 (pp) P06745" source="4278" target="4402" cy:directed="1"/>
      <edge id="6449" label="P97807 (pp) Q9D6J6" source="4278" target="4145" cy:directed="1"/>
      <edge id="6448" label="P97807 (pp) Q9WUM5" source="4278" target="4214" cy:directed="1"/>
      <edge id="6447" label="P97807 (pp) P06151" source="4278" target="4176" cy:directed="1"/>
      <edge id="6446" label="P97807 (pp) Q8K3J1" source="4278" target="4342" cy:directed="1"/>
      <edge id="6445" label="P97807 (pp) Q91YT0" source="4278" target="4317" cy:directed="1"/>
      <edge id="6444" label="P97807 (pp) Q91VR2" source="4278" target="4201" cy:directed="1"/>
      <edge id="6443" label="P97807 (pp) Q05920" source="4278" target="4192" cy:directed="1"/>
      <edge id="6442" label="P97807 (pp) Q60597" source="4278" target="4449" cy:directed="1"/>
      <edge id="6441" label="P97807 (pp) Q9DC69" source="4278" target="4345" cy:directed="1"/>
      <edge id="6440" label="P97807 (pp) Q99LC5" source="4278" target="4253" cy:directed="1"/>
      <edge id="6439" label="P97807 (pp) Q9DCS9" source="4278" target="4204" cy:directed="1"/>
      <edge id="6438" label="P97807 (pp) Q9DCJ5" source="4278" target="4318" cy:directed="1"/>
      <edge id="6437" label="P97807 (pp) Q9DCD0" source="4278" target="4160" cy:directed="1"/>
      <edge id="6436" label="P97807 (pp) O08756" source="4278" target="4321" cy:directed="1"/>
      <edge id="6435" label="P97807 (pp) P48771" source="4278" target="4241" cy:directed="1"/>
      <edge id="6434" label="P97807 (pp) Q9CQQ7" source="4278" target="4347" cy:directed="1"/>
      <edge id="6433" label="P97807 (pp) Q9D6R2" source="4278" target="4174" cy:directed="1"/>
      <edge id="6432" label="P97807 (pp) Q9D2G2" source="4278" target="4225" cy:directed="1"/>
      <edge id="6431" label="P97807 (pp) Q99LX0" source="4278" target="4255" cy:directed="1"/>
      <edge id="6430" label="P97807 (pp) P54071" source="4278" target="4175" cy:directed="1"/>
      <edge id="6429" label="P97807 (pp) Q06185" source="4278" target="4209" cy:directed="1"/>
      <edge id="6428" label="Q9ERS2 (pp) Q9CQH3" source="4277" target="4178" cy:directed="1"/>
      <edge id="6427" label="Q9ERS2 (pp) Q9D6J6" source="4277" target="4145" cy:directed="1"/>
      <edge id="6426" label="Q9ERS2 (pp) O09111" source="4277" target="4149" cy:directed="1"/>
      <edge id="6425" label="Q9ERS2 (pp) Q91VR2" source="4277" target="4201" cy:directed="1"/>
      <edge id="6424" label="Q9ERS2 (pp) P50516" source="4277" target="4231" cy:directed="1"/>
      <edge id="6423" label="Q99KI0 (pp) Q9D6J6" source="4276" target="4145" cy:directed="1"/>
      <edge id="6422" label="Q99KI0 (pp) P05064" source="4276" target="4259" cy:directed="1"/>
      <edge id="6421" label="Q99KI0 (pp) P56480" source="4276" target="4196" cy:directed="1"/>
      <edge id="6420" label="Q99KI0 (pp) P97807" source="4276" target="4278" cy:directed="1"/>
      <edge id="6419" label="Q99KI0 (pp) Q01097" source="4276" target="4142" cy:directed="1"/>
      <edge id="6418" label="Q99KI0 (pp) Q03265" source="4276" target="4150" cy:directed="1"/>
      <edge id="6417" label="Q99KI0 (pp) Q9Z1J3" source="4276" target="4481" cy:directed="1"/>
      <edge id="6416" label="Q99KI0 (pp) P35486" source="4276" target="4377" cy:directed="1"/>
      <edge id="6415" label="Q99KI0 (pp) Q99LX0" source="4276" target="4255" cy:directed="1"/>
      <edge id="6414" label="Q99KI0 (pp) Q60597" source="4276" target="4449" cy:directed="1"/>
      <edge id="6413" label="Q99KI0 (pp) Q9WUM5" source="4276" target="4214" cy:directed="1"/>
      <edge id="6412" label="Q99KI0 (pp) P68510" source="4276" target="4151" cy:directed="1"/>
      <edge id="6411" label="Q99KI0 (pp) Q8K1M6" source="4276" target="4388" cy:directed="1"/>
      <edge id="6410" label="Q99KI0 (pp) Q9CPP6" source="4276" target="4219" cy:directed="1"/>
      <edge id="6409" label="Q99KI0 (pp) Q9D0M3" source="4276" target="4188" cy:directed="1"/>
      <edge id="6408" label="Q99KI0 (pp) Q9DCJ5" source="4276" target="4318" cy:directed="1"/>
      <edge id="6407" label="Q99KI0 (pp) Q9DB20" source="4276" target="4177" cy:directed="1"/>
      <edge id="6406" label="Q99KI0 (pp) P06745" source="4276" target="4402" cy:directed="1"/>
      <edge id="6405" label="Q99KI0 (pp) Q9CR68" source="4276" target="4205" cy:directed="1"/>
      <edge id="6404" label="Q99KI0 (pp) Q91YT0" source="4276" target="4317" cy:directed="1"/>
      <edge id="6403" label="Q99KI0 (pp) Q9ERS2" source="4276" target="4277" cy:directed="1"/>
      <edge id="6402" label="Q99KI0 (pp) Q9D6R2" source="4276" target="4174" cy:directed="1"/>
      <edge id="6401" label="Q99KI0 (pp) O09111" source="4276" target="4149" cy:directed="1"/>
      <edge id="6400" label="Q99KI0 (pp) P70404" source="4276" target="4232" cy:directed="1"/>
      <edge id="6399" label="Q99KI0 (pp) Q9D3D9" source="4276" target="4148" cy:directed="1"/>
      <edge id="6398" label="Q99KI0 (pp) Q05920" source="4276" target="4192" cy:directed="1"/>
      <edge id="6397" label="Q99KI0 (pp) P52480" source="4276" target="4393" cy:directed="1"/>
      <edge id="6396" label="Q99KI0 (pp) P47857" source="4276" target="4469" cy:directed="1"/>
      <edge id="6395" label="Q99KI0 (pp) P54071" source="4276" target="4175" cy:directed="1"/>
      <edge id="6394" label="Q99KI0 (pp) P63038" source="4276" target="4185" cy:directed="1"/>
      <edge id="6393" label="Q99KI0 (pp) Q9CZ13" source="4276" target="4187" cy:directed="1"/>
      <edge id="6392" label="Q99KI0 (pp) Q9DB77" source="4276" target="4343" cy:directed="1"/>
      <edge id="6391" label="Q99KI0 (pp) Q9DC69" source="4276" target="4345" cy:directed="1"/>
      <edge id="6390" label="Q99KI0 (pp) P17751" source="4276" target="4235" cy:directed="1"/>
      <edge id="6389" label="Q99KI0 (pp) Q9CQH3" source="4276" target="4178" cy:directed="1"/>
      <edge id="6388" label="Q99KI0 (pp) Q91VR2" source="4276" target="4201" cy:directed="1"/>
      <edge id="6387" label="Q99KI0 (pp) Q62351" source="4276" target="4337" cy:directed="1"/>
      <edge id="6386" label="Q99KI0 (pp) Q9D2G2" source="4276" target="4225" cy:directed="1"/>
      <edge id="6385" label="O08788 (pp) O35465" source="4275" target="4384" cy:directed="1"/>
      <edge id="6384" label="Q99KJ8 (pp) P28667" source="4274" target="4555" cy:directed="1"/>
      <edge id="6383" label="Q99KJ8 (pp) O08788" source="4274" target="4275" cy:directed="1"/>
      <edge id="6382" label="Q91Z53 (pp) P45376" source="4273" target="4549" cy:directed="1"/>
      <edge id="6381" label="P26443 (pp) Q9DCD0" source="4272" target="4160" cy:directed="1"/>
      <edge id="6380" label="P26443 (pp) P54071" source="4272" target="4175" cy:directed="1"/>
      <edge id="6379" label="P26443 (pp) P48320" source="4272" target="4261" cy:directed="1"/>
      <edge id="6378" label="P26443 (pp) Q99KI0" source="4272" target="4276" cy:directed="1"/>
      <edge id="6377" label="P26443 (pp) P63038" source="4272" target="4185" cy:directed="1"/>
      <edge id="6376" label="P26443 (pp) P56480" source="4272" target="4196" cy:directed="1"/>
      <edge id="6375" label="P26443 (pp) P70404" source="4272" target="4232" cy:directed="1"/>
      <edge id="6374" label="P26443 (pp) Q60597" source="4272" target="4449" cy:directed="1"/>
      <edge id="6373" label="P26443 (pp) P17751" source="4272" target="4235" cy:directed="1"/>
      <edge id="6372" label="P26443 (pp) P61922" source="4272" target="4262" cy:directed="1"/>
      <edge id="6371" label="P26443 (pp) Q05920" source="4272" target="4192" cy:directed="1"/>
      <edge id="6370" label="P26443 (pp) P05063" source="4272" target="4450" cy:directed="1"/>
      <edge id="6369" label="P26443 (pp) P29758" source="4272" target="4441" cy:directed="1"/>
      <edge id="6368" label="P26443 (pp) Q8CHT0" source="4272" target="4440" cy:directed="1"/>
      <edge id="6367" label="P26443 (pp) Q8BH04" source="4272" target="4562" cy:directed="1"/>
      <edge id="6366" label="P26443 (pp) Q9D6R2" source="4272" target="4174" cy:directed="1"/>
      <edge id="6365" label="P26443 (pp) P15105" source="4272" target="4220" cy:directed="1"/>
      <edge id="6364" label="P26443 (pp) P05202" source="4272" target="4154" cy:directed="1"/>
      <edge id="6363" label="P26443 (pp) P97807" source="4272" target="4278" cy:directed="1"/>
      <edge id="6362" label="P26443 (pp) Q61425" source="4272" target="4252" cy:directed="1"/>
      <edge id="6361" label="P26443 (pp) Q91Z53" source="4272" target="4273" cy:directed="1"/>
      <edge id="6360" label="Q62442 (pp) P61264" source="4271" target="4405" cy:directed="1"/>
      <edge id="6359" label="Q9D172 (pp) Q9DC70" source="4270" target="4210" cy:directed="1"/>
      <edge id="6358" label="Q9D172 (pp) P42125" source="4270" target="4457" cy:directed="1"/>
      <edge id="6357" label="Q9D172 (pp) Q9DCJ5" source="4270" target="4318" cy:directed="1"/>
      <edge id="6356" label="Q9D172 (pp) Q8BH95" source="4270" target="4186" cy:directed="1"/>
      <edge id="6355" label="Q9D172 (pp) Q91WD5" source="4270" target="4284" cy:directed="1"/>
      <edge id="6354" label="Q9D172 (pp) Q9CZ13" source="4270" target="4187" cy:directed="1"/>
      <edge id="6353" label="Q9D172 (pp) Q9DCT2" source="4270" target="4171" cy:directed="1"/>
      <edge id="6352" label="Q9D172 (pp) Q9CQZ5" source="4270" target="4144" cy:directed="1"/>
      <edge id="6351" label="Q9D172 (pp) Q91YT0" source="4270" target="4317" cy:directed="1"/>
      <edge id="6350" label="Q9D172 (pp) P97807" source="4270" target="4278" cy:directed="1"/>
      <edge id="6349" label="Q9D172 (pp) Q9CQH3" source="4270" target="4178" cy:directed="1"/>
      <edge id="6348" label="P56391 (pp) Q9DCX2" source="4269" target="4304" cy:directed="1"/>
      <edge id="6347" label="P56391 (pp) P17665" source="4269" target="4493" cy:directed="1"/>
      <edge id="6346" label="P56391 (pp) P00405" source="4269" target="4607" cy:directed="1"/>
      <edge id="6345" label="P56391 (pp) Q9ERS2" source="4269" target="4277" cy:directed="1"/>
      <edge id="6344" label="P56391 (pp) Q9D3D9" source="4269" target="4148" cy:directed="1"/>
      <edge id="6343" label="P56391 (pp) O09111" source="4269" target="4149" cy:directed="1"/>
      <edge id="6342" label="Q9WV18 (pp) Q80T41" source="4268" target="4360" cy:directed="1"/>
      <edge id="6341" label="O35526 (pp) O08599" source="4267" target="4612" cy:directed="1"/>
      <edge id="6340" label="O35526 (pp) P60879" source="4267" target="4319" cy:directed="1"/>
      <edge id="6339" label="O35526 (pp) P63040" source="4267" target="4399" cy:directed="1"/>
      <edge id="6338" label="O35526 (pp) Q62442" source="4267" target="4271" cy:directed="1"/>
      <edge id="6337" label="Q8R5M8 (pp) O70589" source="4266" target="4502" cy:directed="1"/>
      <edge id="6336" label="Q9WV92 (pp) P12023" source="4265" target="4263" cy:directed="1"/>
      <edge id="6335" label="Q9WV92 (pp) Q8R5M8" source="4265" target="4266" cy:directed="1"/>
      <edge id="6334" label="P62814 (pp) Q9Z1G4" source="4264" target="4213" cy:directed="1"/>
      <edge id="6333" label="P62814 (pp) Q9WTT4" source="4264" target="4427" cy:directed="1"/>
      <edge id="6332" label="P62814 (pp) P50518" source="4264" target="4307" cy:directed="1"/>
      <edge id="6331" label="P62814 (pp) Q91VM9" source="4264" target="4344" cy:directed="1"/>
      <edge id="6330" label="P62814 (pp) P63082" source="4264" target="4386" cy:directed="1"/>
      <edge id="6329" label="P62814 (pp) Q9Z1G3" source="4264" target="4162" cy:directed="1"/>
      <edge id="6328" label="P62814 (pp) Q9DC69" source="4264" target="4345" cy:directed="1"/>
      <edge id="6327" label="P62814 (pp) P57746" source="4264" target="4230" cy:directed="1"/>
      <edge id="6326" label="P62814 (pp) Q8BVE3" source="4264" target="4308" cy:directed="1"/>
      <edge id="6325" label="P62814 (pp) P50516" source="4264" target="4231" cy:directed="1"/>
      <edge id="6324" label="P62814 (pp) P51863" source="4264" target="4161" cy:directed="1"/>
      <edge id="6323" label="P12023 (pp) P61264" source="4263" target="4405" cy:directed="1"/>
      <edge id="6322" label="P12023 (pp) P63017" source="4263" target="4358" cy:directed="1"/>
      <edge id="6321" label="P12023 (pp) P11627" source="4263" target="4499" cy:directed="1"/>
      <edge id="6320" label="P12023 (pp) Q61316" source="4263" target="4679" cy:directed="1"/>
      <edge id="6319" label="P12023 (pp) Q9CQV8" source="4263" target="4295" cy:directed="1"/>
      <edge id="6318" label="P12023 (pp) Q9Z1G4" source="4263" target="4213" cy:directed="1"/>
      <edge id="6317" label="P12023 (pp) Q68FD5" source="4263" target="4314" cy:directed="1"/>
      <edge id="6316" label="P12023 (pp) P01831" source="4263" target="4557" cy:directed="1"/>
      <edge id="6315" label="P12023 (pp) Q62420" source="4263" target="4409" cy:directed="1"/>
      <edge id="6314" label="P12023 (pp) P97300" source="4263" target="4682" cy:directed="1"/>
      <edge id="6313" label="P12023 (pp) O55042" source="4263" target="4554" cy:directed="1"/>
      <edge id="6312" label="P12023 (pp) P60879" source="4263" target="4319" cy:directed="1"/>
      <edge id="6311" label="P12023 (pp) P46660" source="4263" target="4339" cy:directed="1"/>
      <edge id="6310" label="P12023 (pp) Q812A2" source="4263" target="4738" cy:directed="1"/>
      <edge id="6309" label="P12023 (pp) O54991" source="4263" target="4548" cy:directed="1"/>
      <edge id="6308" label="P12023 (pp) P28652" source="4263" target="4514" cy:directed="1"/>
      <edge id="6307" label="P12023 (pp) Q91ZZ3" source="4263" target="4736" cy:directed="1"/>
      <edge id="6306" label="P12023 (pp) P57780" source="4263" target="4672" cy:directed="1"/>
      <edge id="6305" label="P12023 (pp) P46096" source="4263" target="4628" cy:directed="1"/>
      <edge id="6304" label="P12023 (pp) P62821" source="4263" target="4586" cy:directed="1"/>
      <edge id="6303" label="P12023 (pp) P08551" source="4263" target="4653" cy:directed="1"/>
      <edge id="6302" label="P12023 (pp) P12960" source="4263" target="4657" cy:directed="1"/>
      <edge id="6301" label="P12023 (pp) P39053" source="4263" target="4435" cy:directed="1"/>
      <edge id="6300" label="P12023 (pp) O08599" source="4263" target="4612" cy:directed="1"/>
      <edge id="6299" label="P12023 (pp) P68510" source="4263" target="4151" cy:directed="1"/>
      <edge id="6298" label="P12023 (pp) P60710" source="4263" target="4280" cy:directed="1"/>
      <edge id="6297" label="P12023 (pp) P63101" source="4263" target="4417" cy:directed="1"/>
      <edge id="6296" label="P12023 (pp) Q9JIS5" source="4263" target="4531" cy:directed="1"/>
      <edge id="6295" label="P12023 (pp) P13595" source="4263" target="4500" cy:directed="1"/>
      <edge id="6294" label="P12023 (pp) O88737" source="4263" target="4433" cy:directed="1"/>
      <edge id="6293" label="P12023 (pp) P61982" source="4263" target="4447" cy:directed="1"/>
      <edge id="6292" label="P12023 (pp) P07901" source="4263" target="4446" cy:directed="1"/>
      <edge id="6291" label="P12023 (pp) O88935" source="4263" target="4369" cy:directed="1"/>
      <edge id="6290" label="P12023 (pp) Q64332" source="4263" target="4536" cy:directed="1"/>
      <edge id="6289" label="P12023 (pp) P56564" source="4263" target="4606" cy:directed="1"/>
      <edge id="6288" label="P12023 (pp) P35564" source="4263" target="4625" cy:directed="1"/>
      <edge id="6287" label="P12023 (pp) Q60932" source="4263" target="4544" cy:directed="1"/>
      <edge id="6286" label="P12023 (pp) Q61548" source="4263" target="4356" cy:directed="1"/>
      <edge id="6285" label="P12023 (pp) Q9D6F9" source="4263" target="4565" cy:directed="1"/>
      <edge id="6284" label="P12023 (pp) P62259" source="4263" target="4163" cy:directed="1"/>
      <edge id="6283" label="P12023 (pp) Q810U3" source="4263" target="4599" cy:directed="1"/>
      <edge id="6282" label="P12023 (pp) Q9Z1G3" source="4263" target="4162" cy:directed="1"/>
      <edge id="6281" label="P12023 (pp) Q62277" source="4263" target="4292" cy:directed="1"/>
      <edge id="6280" label="P12023 (pp) Q9JHU4" source="4263" target="4340" cy:directed="1"/>
      <edge id="6279" label="P12023 (pp) Q8VDN2" source="4263" target="4422" cy:directed="1"/>
      <edge id="6278" label="P12023 (pp) P68254" source="4263" target="4518" cy:directed="1"/>
      <edge id="6277" label="P12023 (pp) O08756" source="4263" target="4321" cy:directed="1"/>
      <edge id="6276" label="P12023 (pp) O35526" source="4263" target="4267" cy:directed="1"/>
      <edge id="6275" label="P12023 (pp) P63011" source="4263" target="4485" cy:directed="1"/>
      <edge id="6274" label="P12023 (pp) P06837" source="4263" target="4445" cy:directed="1"/>
      <edge id="6273" label="P12023 (pp) Q9CZT8" source="4263" target="4376" cy:directed="1"/>
      <edge id="6272" label="P12023 (pp) P62823" source="4263" target="4370" cy:directed="1"/>
      <edge id="6271" label="P12023 (pp) P63044" source="4263" target="4338" cy:directed="1"/>
      <edge id="6270" label="P12023 (pp) P04925" source="4263" target="4323" cy:directed="1"/>
      <edge id="6269" label="P12023 (pp) Q9WV18" source="4263" target="4268" cy:directed="1"/>
      <edge id="6268" label="P12023 (pp) P46460" source="4263" target="4221" cy:directed="1"/>
      <edge id="6267" label="P61922 (pp) Q9EQ20" source="4262" target="4300" cy:directed="1"/>
      <edge id="6266" label="P61922 (pp) P15105" source="4262" target="4220" cy:directed="1"/>
      <edge id="6265" label="P61922 (pp) Q9DBF1" source="4262" target="4420" cy:directed="1"/>
      <edge id="6264" label="P48320 (pp) P15105" source="4261" target="4220" cy:directed="1"/>
      <edge id="6263" label="P48320 (pp) P61922" source="4261" target="4262" cy:directed="1"/>
      <edge id="6262" label="P17710 (pp) Q9WUA3" source="4260" target="4448" cy:directed="1"/>
      <edge id="6261" label="P05064 (pp) P05063" source="4259" target="4450" cy:directed="1"/>
      <edge id="6260" label="P05064 (pp) Q61735" source="4259" target="4305" cy:directed="1"/>
      <edge id="6259" label="P05064 (pp) P17182" source="4259" target="4453" cy:directed="1"/>
      <edge id="6258" label="P05064 (pp) Q9WUA3" source="4259" target="4448" cy:directed="1"/>
      <edge id="6257" label="P05064 (pp) P17710" source="4259" target="4260" cy:directed="1"/>
      <edge id="6256" label="P11499 (pp) Q9CR16" source="4258" target="4673" cy:directed="1"/>
      <edge id="6255" label="P11499 (pp) P60710" source="4258" target="4280" cy:directed="1"/>
      <edge id="6254" label="P11499 (pp) P63037" source="4258" target="4217" cy:directed="1"/>
      <edge id="6253" label="P11499 (pp) P63038" source="4258" target="4185" cy:directed="1"/>
      <edge id="6252" label="P11499 (pp) Q60864" source="4258" target="4312" cy:directed="1"/>
      <edge id="6251" label="P11499 (pp) P62259" source="4258" target="4163" cy:directed="1"/>
      <edge id="6250" label="Q8K1Z0 (pp) Q9ERS2" source="4257" target="4277" cy:directed="1"/>
      <edge id="6249" label="Q8K1Z0 (pp) Q9D6J6" source="4257" target="4145" cy:directed="1"/>
      <edge id="6248" label="Q8K1Z0 (pp) Q9WUM5" source="4257" target="4214" cy:directed="1"/>
      <edge id="6247" label="Q8K1Z0 (pp) Q9DCJ5" source="4257" target="4318" cy:directed="1"/>
      <edge id="6246" label="P62331 (pp) O70161" source="4256" target="4246" cy:directed="1"/>
      <edge id="6245" label="Q99LX0 (pp) Q9CQH3" source="4255" target="4178" cy:directed="1"/>
      <edge id="6244" label="Q99LX0 (pp) Q91VR2" source="4255" target="4201" cy:directed="1"/>
      <edge id="6243" label="Q99LX0 (pp) O08756" source="4255" target="4321" cy:directed="1"/>
      <edge id="6242" label="Q99LX0 (pp) O55042" source="4255" target="4554" cy:directed="1"/>
      <edge id="6241" label="Q99LX0 (pp) Q9D6J6" source="4255" target="4145" cy:directed="1"/>
      <edge id="6240" label="Q99LX0 (pp) O09111" source="4255" target="4149" cy:directed="1"/>
      <edge id="6239" label="Q99LX0 (pp) Q62277" source="4255" target="4292" cy:directed="1"/>
      <edge id="6238" label="Q8BGH2 (pp) Q91YT0" source="4254" target="4317" cy:directed="1"/>
      <edge id="6237" label="Q8BGH2 (pp) Q9WUM5" source="4254" target="4214" cy:directed="1"/>
      <edge id="6236" label="Q8BGH2 (pp) Q9DCJ5" source="4254" target="4318" cy:directed="1"/>
      <edge id="6235" label="Q8BGH2 (pp) Q9CRB9" source="4254" target="4588" cy:directed="1"/>
      <edge id="6234" label="Q8BGH2 (pp) P97807" source="4254" target="4278" cy:directed="1"/>
      <edge id="6233" label="Q8BGH2 (pp) O88441" source="4254" target="4233" cy:directed="1"/>
      <edge id="6232" label="Q8BGH2 (pp) Q9QYA2" source="4254" target="4699" cy:directed="1"/>
      <edge id="6231" label="Q8BGH2 (pp) Q9DC69" source="4254" target="4345" cy:directed="1"/>
      <edge id="6230" label="Q8BGH2 (pp) Q9CZ13" source="4254" target="4187" cy:directed="1"/>
      <edge id="6229" label="Q8BGH2 (pp) Q8CAQ8" source="4254" target="4491" cy:directed="1"/>
      <edge id="6228" label="Q8BGH2 (pp) Q8BH95" source="4254" target="4186" cy:directed="1"/>
      <edge id="6227" label="Q8BGH2 (pp) Q99LX0" source="4254" target="4255" cy:directed="1"/>
      <edge id="6226" label="Q99LC5 (pp) Q9DC69" source="4253" target="4345" cy:directed="1"/>
      <edge id="6225" label="Q99LC5 (pp) O88441" source="4253" target="4233" cy:directed="1"/>
      <edge id="6224" label="Q99LC5 (pp) Q9CR68" source="4253" target="4205" cy:directed="1"/>
      <edge id="6223" label="Q99LC5 (pp) Q9WUM5" source="4253" target="4214" cy:directed="1"/>
      <edge id="6222" label="Q99LC5 (pp) Q8BWT1" source="4253" target="4249" cy:directed="1"/>
      <edge id="6221" label="Q99LC5 (pp) Q9Z0X1" source="4253" target="4488" cy:directed="1"/>
      <edge id="6220" label="Q99LC5 (pp) Q91YT0" source="4253" target="4317" cy:directed="1"/>
      <edge id="6219" label="Q99LC5 (pp) O08756" source="4253" target="4321" cy:directed="1"/>
      <edge id="6218" label="Q99LC5 (pp) Q99JY0" source="4253" target="4322" cy:directed="1"/>
      <edge id="6217" label="Q99LC5 (pp) Q9DBL1" source="4253" target="4389" cy:directed="1"/>
      <edge id="6216" label="Q99LC5 (pp) Q91VR2" source="4253" target="4201" cy:directed="1"/>
      <edge id="6215" label="Q99LC5 (pp) Q80U28" source="4253" target="4597" cy:directed="1"/>
      <edge id="6214" label="Q99LC5 (pp) Q9CQH3" source="4253" target="4178" cy:directed="1"/>
      <edge id="6213" label="Q99LC5 (pp) Q91ZJ5" source="4253" target="4552" cy:directed="1"/>
      <edge id="6212" label="Q99LC5 (pp) Q6PB66" source="4253" target="4436" cy:directed="1"/>
      <edge id="6211" label="Q99LC5 (pp) Q9DCJ5" source="4253" target="4318" cy:directed="1"/>
      <edge id="6210" label="Q99LC5 (pp) Q9D6J6" source="4253" target="4145" cy:directed="1"/>
      <edge id="6209" label="Q99LC5 (pp) P50544" source="4253" target="4397" cy:directed="1"/>
      <edge id="6208" label="Q99LC5 (pp) O09111" source="4253" target="4149" cy:directed="1"/>
      <edge id="6207" label="Q61425 (pp) Q9EQ20" source="4252" target="4300" cy:directed="1"/>
      <edge id="6206" label="Q61425 (pp) Q8QZT1" source="4252" target="4495" cy:directed="1"/>
      <edge id="6205" label="Q61425 (pp) P47738" source="4252" target="4243" cy:directed="1"/>
      <edge id="6204" label="Q61425 (pp) O08756" source="4252" target="4321" cy:directed="1"/>
      <edge id="6203" label="Q61425 (pp) Q99JY0" source="4252" target="4322" cy:directed="1"/>
      <edge id="6202" label="Q61425 (pp) Q8BWT1" source="4252" target="4249" cy:directed="1"/>
      <edge id="6201" label="Q61425 (pp) Q9CQ62" source="4252" target="4223" cy:directed="1"/>
      <edge id="6200" label="Q61425 (pp) Q8BMS1" source="4252" target="4454" cy:directed="1"/>
      <edge id="6199" label="Q61425 (pp) Q9CZS1" source="4252" target="4350" cy:directed="1"/>
      <edge id="6198" label="Q61425 (pp) Q9D0K2" source="4252" target="4215" cy:directed="1"/>
      <edge id="6197" label="Q61425 (pp) Q9DBL1" source="4252" target="4389" cy:directed="1"/>
      <edge id="6196" label="Q61425 (pp) Q9WUM5" source="4252" target="4214" cy:directed="1"/>
      <edge id="6195" label="Q61425 (pp) Q99LC5" source="4252" target="4253" cy:directed="1"/>
      <edge id="6194" label="P12787 (pp) P56480" source="4251" target="4196" cy:directed="1"/>
      <edge id="6193" label="P12787 (pp) Q06185" source="4251" target="4209" cy:directed="1"/>
      <edge id="6192" label="P12787 (pp) Q9CXZ1" source="4251" target="4334" cy:directed="1"/>
      <edge id="6191" label="P12787 (pp) Q9CQZ6" source="4251" target="4169" cy:directed="1"/>
      <edge id="6190" label="P12787 (pp) P19536" source="4251" target="4311" cy:directed="1"/>
      <edge id="6189" label="P12787 (pp) P43024" source="4251" target="4410" cy:directed="1"/>
      <edge id="6188" label="P12787 (pp) Q9DB77" source="4251" target="4343" cy:directed="1"/>
      <edge id="6187" label="P12787 (pp) Q9CQA3" source="4251" target="4250" cy:directed="1"/>
      <edge id="6186" label="P12787 (pp) Q9D855" source="4251" target="4341" cy:directed="1"/>
      <edge id="6185" label="P12787 (pp) Q03265" source="4251" target="4150" cy:directed="1"/>
      <edge id="6184" label="P12787 (pp) P09671" source="4251" target="4382" cy:directed="1"/>
      <edge id="6183" label="P12787 (pp) Q9CQH3" source="4251" target="4178" cy:directed="1"/>
      <edge id="6182" label="P12787 (pp) Q9DCX2" source="4251" target="4304" cy:directed="1"/>
      <edge id="6181" label="P12787 (pp) Q99LC3" source="4251" target="4189" cy:directed="1"/>
      <edge id="6180" label="P12787 (pp) Q91VR2" source="4251" target="4201" cy:directed="1"/>
      <edge id="6179" label="P12787 (pp) Q9CQ54" source="4251" target="4170" cy:directed="1"/>
      <edge id="6178" label="P12787 (pp) Q9DC70" source="4251" target="4210" cy:directed="1"/>
      <edge id="6177" label="P12787 (pp) Q9CPQ1" source="4251" target="4542" cy:directed="1"/>
      <edge id="6176" label="P12787 (pp) Q9CQJ8" source="4251" target="4208" cy:directed="1"/>
      <edge id="6175" label="P12787 (pp) Q9CQ69" source="4251" target="4172" cy:directed="1"/>
      <edge id="6174" label="P12787 (pp) Q9D6J5" source="4251" target="4425" cy:directed="1"/>
      <edge id="6173" label="P12787 (pp) Q9D0M3" source="4251" target="4188" cy:directed="1"/>
      <edge id="6172" label="P12787 (pp) Q9DCJ5" source="4251" target="4318" cy:directed="1"/>
      <edge id="6171" label="P12787 (pp) Q9CQZ5" source="4251" target="4144" cy:directed="1"/>
      <edge id="6170" label="P12787 (pp) P00405" source="4251" target="4607" cy:directed="1"/>
      <edge id="6169" label="P12787 (pp) Q9DB20" source="4251" target="4177" cy:directed="1"/>
      <edge id="6168" label="P12787 (pp) Q9D6J6" source="4251" target="4145" cy:directed="1"/>
      <edge id="6167" label="P12787 (pp) Q9CQQ7" source="4251" target="4347" cy:directed="1"/>
      <edge id="6166" label="P12787 (pp) P19783" source="4251" target="4183" cy:directed="1"/>
      <edge id="6165" label="P12787 (pp) Q9ERS2" source="4251" target="4277" cy:directed="1"/>
      <edge id="6164" label="P12787 (pp) P56391" source="4251" target="4269" cy:directed="1"/>
      <edge id="6163" label="P12787 (pp) Q9DCT2" source="4251" target="4171" cy:directed="1"/>
      <edge id="6162" label="P12787 (pp) P97450" source="4251" target="4368" cy:directed="1"/>
      <edge id="6161" label="P12787 (pp) Q9DCW4" source="4251" target="4218" cy:directed="1"/>
      <edge id="6160" label="P12787 (pp) Q9DC69" source="4251" target="4345" cy:directed="1"/>
      <edge id="6159" label="P12787 (pp) P17665" source="4251" target="4493" cy:directed="1"/>
      <edge id="6158" label="P12787 (pp) Q8VEM8" source="4251" target="4287" cy:directed="1"/>
      <edge id="6157" label="P12787 (pp) Q7TMF3" source="4251" target="4303" cy:directed="1"/>
      <edge id="6156" label="P12787 (pp) Q8K3J1" source="4251" target="4342" cy:directed="1"/>
      <edge id="6155" label="P12787 (pp) Q9D3D9" source="4251" target="4148" cy:directed="1"/>
      <edge id="6154" label="P12787 (pp) Q99LC5" source="4251" target="4253" cy:directed="1"/>
      <edge id="6153" label="P12787 (pp) Q9DCS9" source="4251" target="4204" cy:directed="1"/>
      <edge id="6152" label="P12787 (pp) Q9D6R2" source="4251" target="4174" cy:directed="1"/>
      <edge id="6151" label="P12787 (pp) P52503" source="4251" target="4290" cy:directed="1"/>
      <edge id="6150" label="P12787 (pp) Q9CR68" source="4251" target="4205" cy:directed="1"/>
      <edge id="6149" label="Q9CQA3 (pp) Q60597" source="4250" target="4449" cy:directed="1"/>
      <edge id="6148" label="Q9CQA3 (pp) P08249" source="4250" target="4173" cy:directed="1"/>
      <edge id="6147" label="Q9CQA3 (pp) Q9CQJ8" source="4250" target="4208" cy:directed="1"/>
      <edge id="6146" label="Q9CQA3 (pp) Q9ERS2" source="4250" target="4277" cy:directed="1"/>
      <edge id="6145" label="Q9CQA3 (pp) P99029" source="4250" target="4294" cy:directed="1"/>
      <edge id="6144" label="Q9CQA3 (pp) P19536" source="4250" target="4311" cy:directed="1"/>
      <edge id="6143" label="Q9CQA3 (pp) Q99LX0" source="4250" target="4255" cy:directed="1"/>
      <edge id="6142" label="Q9CQA3 (pp) Q9D3D9" source="4250" target="4148" cy:directed="1"/>
      <edge id="6141" label="Q9CQA3 (pp) O09111" source="4250" target="4149" cy:directed="1"/>
      <edge id="6140" label="Q9CQA3 (pp) P43024" source="4250" target="4410" cy:directed="1"/>
      <edge id="6139" label="Q9CQA3 (pp) P17751" source="4250" target="4235" cy:directed="1"/>
      <edge id="6138" label="Q9CQA3 (pp) Q9CQ69" source="4250" target="4172" cy:directed="1"/>
      <edge id="6137" label="Q9CQA3 (pp) Q9DC70" source="4250" target="4210" cy:directed="1"/>
      <edge id="6136" label="Q9CQA3 (pp) Q9D6R2" source="4250" target="4174" cy:directed="1"/>
      <edge id="6135" label="Q9CQA3 (pp) P19783" source="4250" target="4183" cy:directed="1"/>
      <edge id="6134" label="Q9CQA3 (pp) Q91WD5" source="4250" target="4284" cy:directed="1"/>
      <edge id="6133" label="Q9CQA3 (pp) Q9CPP6" source="4250" target="4219" cy:directed="1"/>
      <edge id="6132" label="Q9CQA3 (pp) Q9DCD0" source="4250" target="4160" cy:directed="1"/>
      <edge id="6131" label="Q9CQA3 (pp) P97450" source="4250" target="4368" cy:directed="1"/>
      <edge id="6130" label="Q9CQA3 (pp) P56480" source="4250" target="4196" cy:directed="1"/>
      <edge id="6129" label="Q9CQA3 (pp) Q9DCX2" source="4250" target="4304" cy:directed="1"/>
      <edge id="6128" label="Q9CQA3 (pp) Q91YT0" source="4250" target="4317" cy:directed="1"/>
      <edge id="6127" label="Q9CQA3 (pp) Q8VEM8" source="4250" target="4287" cy:directed="1"/>
      <edge id="6126" label="Q9CQA3 (pp) Q64521" source="4250" target="4363" cy:directed="1"/>
      <edge id="6125" label="Q9CQA3 (pp) Q61425" source="4250" target="4252" cy:directed="1"/>
      <edge id="6124" label="Q9CQA3 (pp) Q91VR2" source="4250" target="4201" cy:directed="1"/>
      <edge id="6123" label="Q9CQA3 (pp) Q03265" source="4250" target="4150" cy:directed="1"/>
      <edge id="6122" label="Q9CQA3 (pp) Q7TMF3" source="4250" target="4303" cy:directed="1"/>
      <edge id="6121" label="Q9CQA3 (pp) Q9CQQ7" source="4250" target="4347" cy:directed="1"/>
      <edge id="6120" label="Q9CQA3 (pp) Q99LC5" source="4250" target="4253" cy:directed="1"/>
      <edge id="6119" label="Q9CQA3 (pp) Q9CQZ5" source="4250" target="4144" cy:directed="1"/>
      <edge id="6118" label="Q9CQA3 (pp) P20108" source="4250" target="4365" cy:directed="1"/>
      <edge id="6117" label="Q9CQA3 (pp) Q9D6J6" source="4250" target="4145" cy:directed="1"/>
      <edge id="6116" label="Q9CQA3 (pp) Q91VD9" source="4250" target="4203" cy:directed="1"/>
      <edge id="6115" label="Q9CQA3 (pp) Q9CR68" source="4250" target="4205" cy:directed="1"/>
      <edge id="6114" label="Q9CQA3 (pp) Q8K2B3" source="4250" target="4285" cy:directed="1"/>
      <edge id="6113" label="Q9CQA3 (pp) Q9CQ75" source="4250" target="4327" cy:directed="1"/>
      <edge id="6112" label="Q9CQA3 (pp) Q9DB77" source="4250" target="4343" cy:directed="1"/>
      <edge id="6111" label="Q9CQA3 (pp) P56391" source="4250" target="4269" cy:directed="1"/>
      <edge id="6110" label="Q9CQA3 (pp) Q9D6J5" source="4250" target="4425" cy:directed="1"/>
      <edge id="6109" label="Q9CQA3 (pp) Q9WUM5" source="4250" target="4214" cy:directed="1"/>
      <edge id="6108" label="Q9CQA3 (pp) Q9DC69" source="4250" target="4345" cy:directed="1"/>
      <edge id="6107" label="Q9CQA3 (pp) P52503" source="4250" target="4290" cy:directed="1"/>
      <edge id="6106" label="Q9CQA3 (pp) Q9CQH3" source="4250" target="4178" cy:directed="1"/>
      <edge id="6105" label="Q9CQA3 (pp) Q9CPQ1" source="4250" target="4542" cy:directed="1"/>
      <edge id="6104" label="Q9CQA3 (pp) P70404" source="4250" target="4232" cy:directed="1"/>
      <edge id="6103" label="Q9CQA3 (pp) P97807" source="4250" target="4278" cy:directed="1"/>
      <edge id="6102" label="Q9CQA3 (pp) Q9D855" source="4250" target="4341" cy:directed="1"/>
      <edge id="6101" label="Q9CQA3 (pp) Q9DB20" source="4250" target="4177" cy:directed="1"/>
      <edge id="6100" label="Q9CQA3 (pp) Q9CQ62" source="4250" target="4223" cy:directed="1"/>
      <edge id="6099" label="Q9CQA3 (pp) Q99KI0" source="4250" target="4276" cy:directed="1"/>
      <edge id="6098" label="Q9CQA3 (pp) P54071" source="4250" target="4175" cy:directed="1"/>
      <edge id="6097" label="Q9CQA3 (pp) Q9DCJ5" source="4250" target="4318" cy:directed="1"/>
      <edge id="6096" label="Q9CQA3 (pp) Q9D2G2" source="4250" target="4225" cy:directed="1"/>
      <edge id="6095" label="Q9CQA3 (pp) Q9CQZ6" source="4250" target="4169" cy:directed="1"/>
      <edge id="6094" label="Q9CQA3 (pp) Q9DCS9" source="4250" target="4204" cy:directed="1"/>
      <edge id="6093" label="Q9CQA3 (pp) Q9Z1P6" source="4250" target="4237" cy:directed="1"/>
      <edge id="6092" label="Q9CQA3 (pp) Q9Z2I9" source="4250" target="4396" cy:directed="1"/>
      <edge id="6091" label="Q9CQA3 (pp) Q8K3J1" source="4250" target="4342" cy:directed="1"/>
      <edge id="6090" label="Q9CQA3 (pp) Q06185" source="4250" target="4209" cy:directed="1"/>
      <edge id="6089" label="Q9CQA3 (pp) Q9CZ13" source="4250" target="4187" cy:directed="1"/>
      <edge id="6088" label="Q9CQA3 (pp) Q9D0M3" source="4250" target="4188" cy:directed="1"/>
      <edge id="6087" label="Q8BWT1 (pp) Q91ZA3" source="4249" target="4415" cy:directed="1"/>
      <edge id="6086" label="Q8BWT1 (pp) O08756" source="4249" target="4321" cy:directed="1"/>
      <edge id="6085" label="Q8BWT1 (pp) Q9WUM5" source="4249" target="4214" cy:directed="1"/>
      <edge id="6084" label="Q8BWT1 (pp) Q8BMS1" source="4249" target="4454" cy:directed="1"/>
      <edge id="6083" label="Q8BWT1 (pp) Q99JY0" source="4249" target="4322" cy:directed="1"/>
      <edge id="6082" label="Q8BWT1 (pp) Q9EQ20" source="4249" target="4300" cy:directed="1"/>
      <edge id="6081" label="Q8BWT1 (pp) Q9DBL1" source="4249" target="4389" cy:directed="1"/>
      <edge id="6080" label="Q8BWT1 (pp) Q9D0K2" source="4249" target="4215" cy:directed="1"/>
      <edge id="6079" label="Q921G7 (pp) Q99LC5" source="4248" target="4253" cy:directed="1"/>
      <edge id="6078" label="Q921G7 (pp) Q9CQ62" source="4248" target="4223" cy:directed="1"/>
      <edge id="6077" label="Q921G7 (pp) Q80U28" source="4248" target="4597" cy:directed="1"/>
      <edge id="6076" label="Q921G7 (pp) Q9WUM5" source="4248" target="4214" cy:directed="1"/>
      <edge id="6075" label="Q921G7 (pp) Q99JY0" source="4248" target="4322" cy:directed="1"/>
      <edge id="6074" label="Q921G7 (pp) Q9D6J6" source="4248" target="4145" cy:directed="1"/>
      <edge id="6073" label="Q921G7 (pp) Q8BMS1" source="4248" target="4454" cy:directed="1"/>
      <edge id="6072" label="Q921G7 (pp) Q61425" source="4248" target="4252" cy:directed="1"/>
      <edge id="6071" label="Q921G7 (pp) Q8BWT1" source="4248" target="4249" cy:directed="1"/>
      <edge id="6070" label="Q9Z1B3 (pp) P35438" source="4247" target="4153" cy:directed="1"/>
      <edge id="6069" label="Q9Z1B3 (pp) Q01097" source="4247" target="4142" cy:directed="1"/>
      <edge id="6068" label="O70161 (pp) Q71LX4" source="4246" target="4635" cy:directed="1"/>
      <edge id="6067" label="O70161 (pp) P17426" source="4246" target="4229" cy:directed="1"/>
      <edge id="6066" label="O70161 (pp) Q9Z1B3" source="4246" target="4247" cy:directed="1"/>
      <edge id="6065" label="Q6PER3 (pp) O08788" source="4245" target="4275" cy:directed="1"/>
      <edge id="6064" label="P63005 (pp) P20357" source="4244" target="4558" cy:directed="1"/>
      <edge id="6063" label="P63005 (pp) Q99KJ8" source="4244" target="4274" cy:directed="1"/>
      <edge id="6062" label="P63005 (pp) O08788" source="4244" target="4275" cy:directed="1"/>
      <edge id="6061" label="P63005 (pp) Q6PER3" source="4244" target="4245" cy:directed="1"/>
      <edge id="6060" label="P47738 (pp) Q8BW75" source="4243" target="4611" cy:directed="1"/>
      <edge id="6059" label="P47738 (pp) Q9EQ20" source="4243" target="4300" cy:directed="1"/>
      <edge id="6058" label="P47738 (pp) Q8CHT0" source="4243" target="4440" cy:directed="1"/>
      <edge id="6057" label="P47738 (pp) P61922" source="4243" target="4262" cy:directed="1"/>
      <edge id="6056" label="Q64133 (pp) Q9DBF1" source="4242" target="4420" cy:directed="1"/>
      <edge id="6055" label="Q64133 (pp) Q9CZS1" source="4242" target="4350" cy:directed="1"/>
      <edge id="6054" label="Q64133 (pp) Q9JLJ2" source="4242" target="4200" cy:directed="1"/>
      <edge id="6053" label="Q64133 (pp) P47738" source="4242" target="4243" cy:directed="1"/>
      <edge id="6052" label="P48771 (pp) P43024" source="4241" target="4410" cy:directed="1"/>
      <edge id="6051" label="P48771 (pp) Q9CQ69" source="4241" target="4172" cy:directed="1"/>
      <edge id="6050" label="P48771 (pp) Q9CQH3" source="4241" target="4178" cy:directed="1"/>
      <edge id="6049" label="P48771 (pp) Q9D6J6" source="4241" target="4145" cy:directed="1"/>
      <edge id="6048" label="P48771 (pp) Q06185" source="4241" target="4209" cy:directed="1"/>
      <edge id="6047" label="P48771 (pp) Q99LX0" source="4241" target="4255" cy:directed="1"/>
      <edge id="6046" label="P48771 (pp) P56391" source="4241" target="4269" cy:directed="1"/>
      <edge id="6045" label="P48771 (pp) Q91VR2" source="4241" target="4201" cy:directed="1"/>
      <edge id="6044" label="P48771 (pp) Q9DC69" source="4241" target="4345" cy:directed="1"/>
      <edge id="6043" label="O70325 (pp) P99029" source="4240" target="4294" cy:directed="1"/>
      <edge id="6042" label="O70325 (pp) Q9ERS2" source="4240" target="4277" cy:directed="1"/>
      <edge id="6041" label="O70325 (pp) Q9D3D9" source="4240" target="4148" cy:directed="1"/>
      <edge id="6040" label="O70325 (pp) Q99LX0" source="4240" target="4255" cy:directed="1"/>
      <edge id="6039" label="P62812 (pp) P22723" source="4239" target="4594" cy:directed="1"/>
      <edge id="6038" label="P62812 (pp) P63328" source="4239" target="4553" cy:directed="1"/>
      <edge id="6037" label="P63137 (pp) P62812" source="4238" target="4239" cy:directed="1"/>
      <edge id="6036" label="Q9Z1P6 (pp) O09111" source="4237" target="4149" cy:directed="1"/>
      <edge id="6035" label="Q9Z1P6 (pp) Q9DCX2" source="4237" target="4304" cy:directed="1"/>
      <edge id="6034" label="Q9Z1P6 (pp) Q91YT0" source="4237" target="4317" cy:directed="1"/>
      <edge id="6033" label="Q9Z1P6 (pp) Q9DCS9" source="4237" target="4204" cy:directed="1"/>
      <edge id="6032" label="Q9Z1P6 (pp) O08756" source="4237" target="4321" cy:directed="1"/>
      <edge id="6031" label="Q9Z1P6 (pp) Q06185" source="4237" target="4209" cy:directed="1"/>
      <edge id="6030" label="Q9Z1P6 (pp) Q8K3J1" source="4237" target="4342" cy:directed="1"/>
      <edge id="6029" label="Q9Z1P6 (pp) Q9DCJ5" source="4237" target="4318" cy:directed="1"/>
      <edge id="6028" label="Q9Z1P6 (pp) Q9CQH3" source="4237" target="4178" cy:directed="1"/>
      <edge id="6027" label="Q9Z1P6 (pp) Q9CQ69" source="4237" target="4172" cy:directed="1"/>
      <edge id="6026" label="Q9Z1P6 (pp) Q99LX0" source="4237" target="4255" cy:directed="1"/>
      <edge id="6025" label="Q9Z1P6 (pp) Q9CPQ8" source="4237" target="4202" cy:directed="1"/>
      <edge id="6024" label="Q9Z1P6 (pp) Q9DC69" source="4237" target="4345" cy:directed="1"/>
      <edge id="6023" label="Q9Z1P6 (pp) Q9D3D9" source="4237" target="4148" cy:directed="1"/>
      <edge id="6022" label="Q9Z1P6 (pp) Q3UIU2" source="4237" target="4226" cy:directed="1"/>
      <edge id="6021" label="Q9Z1P6 (pp) P56391" source="4237" target="4269" cy:directed="1"/>
      <edge id="6020" label="Q9Z1P6 (pp) Q9ERS2" source="4237" target="4277" cy:directed="1"/>
      <edge id="6019" label="Q9Z1P6 (pp) Q9D6J6" source="4237" target="4145" cy:directed="1"/>
      <edge id="6018" label="P09411 (pp) P06151" source="4236" target="4176" cy:directed="1"/>
      <edge id="6017" label="P09411 (pp) P16858" source="4236" target="4497" cy:directed="1"/>
      <edge id="6016" label="P09411 (pp) P17742" source="4236" target="4197" cy:directed="1"/>
      <edge id="6015" label="P09411 (pp) P17182" source="4236" target="4453" cy:directed="1"/>
      <edge id="6014" label="P09411 (pp) Q9DCD0" source="4236" target="4160" cy:directed="1"/>
      <edge id="6013" label="P17751 (pp) Q91YT0" source="4235" target="4317" cy:directed="1"/>
      <edge id="6012" label="P17751 (pp) Q9R0P5" source="4235" target="4754" cy:directed="1"/>
      <edge id="6011" label="P17751 (pp) P06151" source="4235" target="4176" cy:directed="1"/>
      <edge id="6010" label="P17751 (pp) P52480" source="4235" target="4393" cy:directed="1"/>
      <edge id="6009" label="P17751 (pp) P63101" source="4235" target="4417" cy:directed="1"/>
      <edge id="6008" label="P17751 (pp) Q91VR2" source="4235" target="4201" cy:directed="1"/>
      <edge id="6007" label="P17751 (pp) Q9WUA3" source="4235" target="4448" cy:directed="1"/>
      <edge id="6006" label="P17751 (pp) Q9CR68" source="4235" target="4205" cy:directed="1"/>
      <edge id="6005" label="P17751 (pp) P05064" source="4235" target="4259" cy:directed="1"/>
      <edge id="6004" label="P17751 (pp) Q03265" source="4235" target="4150" cy:directed="1"/>
      <edge id="6003" label="P17751 (pp) P97807" source="4235" target="4278" cy:directed="1"/>
      <edge id="6002" label="P17751 (pp) Q8K3J1" source="4235" target="4342" cy:directed="1"/>
      <edge id="6001" label="P17751 (pp) P99029" source="4235" target="4294" cy:directed="1"/>
      <edge id="6000" label="P17751 (pp) P23506" source="4235" target="4424" cy:directed="1"/>
      <edge id="5999" label="P17751 (pp) Q9WUM5" source="4235" target="4214" cy:directed="1"/>
      <edge id="5998" label="P17751 (pp) P16858" source="4235" target="4497" cy:directed="1"/>
      <edge id="5997" label="P17751 (pp) P47857" source="4235" target="4469" cy:directed="1"/>
      <edge id="5996" label="P17751 (pp) Q64521" source="4235" target="4363" cy:directed="1"/>
      <edge id="5995" label="P17751 (pp) Q9D2G2" source="4235" target="4225" cy:directed="1"/>
      <edge id="5994" label="P17751 (pp) P70296" source="4235" target="4605" cy:directed="1"/>
      <edge id="5993" label="P17751 (pp) Q91VD9" source="4235" target="4203" cy:directed="1"/>
      <edge id="5992" label="P17751 (pp) P56480" source="4235" target="4196" cy:directed="1"/>
      <edge id="5991" label="P17751 (pp) Q9D6J6" source="4235" target="4145" cy:directed="1"/>
      <edge id="5990" label="P17751 (pp) Q9CZ13" source="4235" target="4187" cy:directed="1"/>
      <edge id="5989" label="P17751 (pp) Q93092" source="4235" target="4392" cy:directed="1"/>
      <edge id="5988" label="P17751 (pp) P09411" source="4235" target="4236" cy:directed="1"/>
      <edge id="5987" label="P17751 (pp) Q99LX0" source="4235" target="4255" cy:directed="1"/>
      <edge id="5986" label="P17751 (pp) P17182" source="4235" target="4453" cy:directed="1"/>
      <edge id="5985" label="P17751 (pp) P05063" source="4235" target="4450" cy:directed="1"/>
      <edge id="5984" label="P17751 (pp) P06745" source="4235" target="4402" cy:directed="1"/>
      <edge id="5983" label="Q7TQI3 (pp) P68510" source="4234" target="4151" cy:directed="1"/>
      <edge id="5982" label="O88441 (pp) Q6PB66" source="4233" target="4436" cy:directed="1"/>
      <edge id="5981" label="O88441 (pp) Q9CQH3" source="4233" target="4178" cy:directed="1"/>
      <edge id="5980" label="O88441 (pp) Q9D6J6" source="4233" target="4145" cy:directed="1"/>
      <edge id="5979" label="P70404 (pp) Q9D2G2" source="4232" target="4225" cy:directed="1"/>
      <edge id="5978" label="P70404 (pp) Q60597" source="4232" target="4449" cy:directed="1"/>
      <edge id="5977" label="P70404 (pp) Q9DC69" source="4232" target="4345" cy:directed="1"/>
      <edge id="5976" label="P70404 (pp) Q9WUM5" source="4232" target="4214" cy:directed="1"/>
      <edge id="5975" label="P70404 (pp) Q91VR2" source="4232" target="4201" cy:directed="1"/>
      <edge id="5974" label="P50516 (pp) P08553" source="4231" target="4655" cy:directed="1"/>
      <edge id="5973" label="P50516 (pp) P12382" source="4231" target="4152" cy:directed="1"/>
      <edge id="5972" label="P50516 (pp) Q91VR2" source="4231" target="4201" cy:directed="1"/>
      <edge id="5971" label="P50516 (pp) Q3UHL1" source="4231" target="4543" cy:directed="1"/>
      <edge id="5970" label="P50516 (pp) Q9Z1J3" source="4231" target="4481" cy:directed="1"/>
      <edge id="5969" label="P50516 (pp) Q9Z0E0" source="4231" target="4739" cy:directed="1"/>
      <edge id="5968" label="P50516 (pp) P17426" source="4231" target="4229" cy:directed="1"/>
      <edge id="5967" label="P50516 (pp) O54983" source="4231" target="4651" cy:directed="1"/>
      <edge id="5966" label="P50516 (pp) Q80XN0" source="4231" target="4712" cy:directed="1"/>
      <edge id="5965" label="P50516 (pp) Q99LX0" source="4231" target="4255" cy:directed="1"/>
      <edge id="5964" label="P50516 (pp) P17427" source="4231" target="4228" cy:directed="1"/>
      <edge id="5963" label="P50516 (pp) Q8VD37" source="4231" target="4496" cy:directed="1"/>
      <edge id="5962" label="P50516 (pp) Q9JLM8" source="4231" target="4366" cy:directed="1"/>
      <edge id="5961" label="P50516 (pp) O08539" source="4231" target="4534" cy:directed="1"/>
      <edge id="5960" label="P50516 (pp) P63082" source="4231" target="4386" cy:directed="1"/>
      <edge id="5959" label="P50516 (pp) Q62425" source="4231" target="4483" cy:directed="1"/>
      <edge id="5958" label="P50516 (pp) Q9Z2I0" source="4231" target="4648" cy:directed="1"/>
      <edge id="5957" label="P50516 (pp) O35643" source="4231" target="4617" cy:directed="1"/>
      <edge id="5956" label="P50516 (pp) Q5DQR4" source="4231" target="4609" cy:directed="1"/>
      <edge id="5955" label="P50516 (pp) Q5SQX6" source="4231" target="4541" cy:directed="1"/>
      <edge id="5954" label="P50516 (pp) P47754" source="4231" target="4375" cy:directed="1"/>
      <edge id="5953" label="P50516 (pp) Q9D6R2" source="4231" target="4174" cy:directed="1"/>
      <edge id="5952" label="P50516 (pp) P28660" source="4231" target="4320" cy:directed="1"/>
      <edge id="5951" label="P50516 (pp) P01831" source="4231" target="4557" cy:directed="1"/>
      <edge id="5950" label="P50516 (pp) Q9QYR6" source="4231" target="4546" cy:directed="1"/>
      <edge id="5949" label="P50516 (pp) P46660" source="4231" target="4339" cy:directed="1"/>
      <edge id="5948" label="P50516 (pp) P46460" source="4231" target="4221" cy:directed="1"/>
      <edge id="5947" label="P50516 (pp) Q9D6J6" source="4231" target="4145" cy:directed="1"/>
      <edge id="5946" label="P50516 (pp) P55088" source="4231" target="4473" cy:directed="1"/>
      <edge id="5945" label="P50516 (pp) P53395" source="4231" target="4390" cy:directed="1"/>
      <edge id="5944" label="P50516 (pp) Q7TQF7" source="4231" target="4443" cy:directed="1"/>
      <edge id="5943" label="P50516 (pp) P39053" source="4231" target="4435" cy:directed="1"/>
      <edge id="5942" label="P50516 (pp) Q7TPR4" source="4231" target="4404" cy:directed="1"/>
      <edge id="5941" label="P50516 (pp) P60710" source="4231" target="4280" cy:directed="1"/>
      <edge id="5940" label="P50516 (pp) Q8BPN8" source="4231" target="4385" cy:directed="1"/>
      <edge id="5939" label="P50516 (pp) Q9R0K7" source="4231" target="4361" cy:directed="1"/>
      <edge id="5938" label="P50516 (pp) Q9JHU4" source="4231" target="4340" cy:directed="1"/>
      <edge id="5937" label="P57746 (pp) Q9CQH3" source="4230" target="4178" cy:directed="1"/>
      <edge id="5936" label="P57746 (pp) P63082" source="4230" target="4386" cy:directed="1"/>
      <edge id="5935" label="P57746 (pp) P23506" source="4230" target="4424" cy:directed="1"/>
      <edge id="5934" label="P57746 (pp) Q9WTT4" source="4230" target="4427" cy:directed="1"/>
      <edge id="5933" label="P57746 (pp) Q9Z1G3" source="4230" target="4162" cy:directed="1"/>
      <edge id="5932" label="P57746 (pp) P97450" source="4230" target="4368" cy:directed="1"/>
      <edge id="5931" label="P57746 (pp) Q9CQZ6" source="4230" target="4169" cy:directed="1"/>
      <edge id="5930" label="P57746 (pp) Q9Z1G4" source="4230" target="4213" cy:directed="1"/>
      <edge id="5929" label="P57746 (pp) Q8BVE3" source="4230" target="4308" cy:directed="1"/>
      <edge id="5928" label="P57746 (pp) P50516" source="4230" target="4231" cy:directed="1"/>
      <edge id="5927" label="P17426 (pp) Q8CHC4" source="4229" target="4577" cy:directed="1"/>
      <edge id="5926" label="P17426 (pp) Q80VP1" source="4229" target="4570" cy:directed="1"/>
      <edge id="5925" label="P17426 (pp) O08585" source="4229" target="4545" cy:directed="1"/>
      <edge id="5924" label="P17426 (pp) P62743" source="4229" target="4595" cy:directed="1"/>
      <edge id="5923" label="P17427 (pp) Q9DBG3" source="4228" target="4474" cy:directed="1"/>
      <edge id="5922" label="P17427 (pp) P84091" source="4228" target="4507" cy:directed="1"/>
      <edge id="5921" label="P17427 (pp) Q6IRU5" source="4228" target="4475" cy:directed="1"/>
      <edge id="5920" label="P17427 (pp) Q8CHC4" source="4228" target="4577" cy:directed="1"/>
      <edge id="5919" label="P17427 (pp) P39053" source="4228" target="4435" cy:directed="1"/>
      <edge id="5918" label="P17427 (pp) P62743" source="4228" target="4595" cy:directed="1"/>
      <edge id="5917" label="P17427 (pp) Q80VP1" source="4228" target="4570" cy:directed="1"/>
      <edge id="5916" label="P17427 (pp) O08585" source="4228" target="4545" cy:directed="1"/>
      <edge id="5915" label="P17427 (pp) Q68FD5" source="4228" target="4314" cy:directed="1"/>
      <edge id="5914" label="P17427 (pp) P17426" source="4228" target="4229" cy:directed="1"/>
      <edge id="5913" label="P31938 (pp) P16054" source="4227" target="4381" cy:directed="1"/>
      <edge id="5912" label="P31938 (pp) P35438" source="4227" target="4153" cy:directed="1"/>
      <edge id="5911" label="P31938 (pp) P63085" source="4227" target="4193" cy:directed="1"/>
      <edge id="5910" label="Q3UIU2 (pp) Q9CQH3" source="4226" target="4178" cy:directed="1"/>
      <edge id="5909" label="Q3UIU2 (pp) Q9D6J6" source="4226" target="4145" cy:directed="1"/>
      <edge id="5908" label="Q9D2G2 (pp) Q9D3D9" source="4225" target="4148" cy:directed="1"/>
      <edge id="5907" label="Q9D2G2 (pp) Q60597" source="4225" target="4449" cy:directed="1"/>
      <edge id="5906" label="Q9D2G2 (pp) Q9WUM5" source="4225" target="4214" cy:directed="1"/>
      <edge id="5905" label="Q9D2G2 (pp) Q91VR2" source="4225" target="4201" cy:directed="1"/>
      <edge id="5904" label="Q9CQ62 (pp) P41216" source="4223" target="4566" cy:directed="1"/>
      <edge id="5903" label="Q9CQ62 (pp) P19096" source="4223" target="4624" cy:directed="1"/>
      <edge id="5902" label="Q9CQ62 (pp) Q99LC5" source="4223" target="4253" cy:directed="1"/>
      <edge id="5901" label="Q9CQ62 (pp) Q8BWT1" source="4223" target="4249" cy:directed="1"/>
      <edge id="5900" label="Q9CQ62 (pp) Q99JY0" source="4223" target="4322" cy:directed="1"/>
      <edge id="5899" label="Q08331 (pp) Q01097" source="4222" target="4142" cy:directed="1"/>
      <edge id="5898" label="Q08331 (pp) Q9CQ62" source="4222" target="4223" cy:directed="1"/>
      <edge id="5897" label="P46460 (pp) P63101" source="4221" target="4417" cy:directed="1"/>
      <edge id="5896" label="P46460 (pp) P23819" source="4221" target="4157" cy:directed="1"/>
      <edge id="5895" label="P46460 (pp) P35438" source="4221" target="4153" cy:directed="1"/>
      <edge id="5894" label="P46460 (pp) O35526" source="4221" target="4267" cy:directed="1"/>
      <edge id="5893" label="P46460 (pp) O08599" source="4221" target="4612" cy:directed="1"/>
      <edge id="5892" label="P46460 (pp) Q62442" source="4221" target="4271" cy:directed="1"/>
      <edge id="5891" label="P46460 (pp) Q9CWZ7" source="4221" target="4631" cy:directed="1"/>
      <edge id="5890" label="P46460 (pp) Q01097" source="4221" target="4142" cy:directed="1"/>
      <edge id="5889" label="Q9CPP6 (pp) Q91YT0" source="4219" target="4317" cy:directed="1"/>
      <edge id="5888" label="Q9CPP6 (pp) P43024" source="4219" target="4410" cy:directed="1"/>
      <edge id="5887" label="Q9CPP6 (pp) P56391" source="4219" target="4269" cy:directed="1"/>
      <edge id="5886" label="Q9CPP6 (pp) Q9Z1P6" source="4219" target="4237" cy:directed="1"/>
      <edge id="5885" label="Q9CPP6 (pp) Q9WUM5" source="4219" target="4214" cy:directed="1"/>
      <edge id="5884" label="Q9CPP6 (pp) Q9CQH3" source="4219" target="4178" cy:directed="1"/>
      <edge id="5883" label="Q9CPP6 (pp) Q9D6J5" source="4219" target="4425" cy:directed="1"/>
      <edge id="5882" label="Q9CPP6 (pp) Q99LC5" source="4219" target="4253" cy:directed="1"/>
      <edge id="5881" label="Q9CPP6 (pp) Q9CQ69" source="4219" target="4172" cy:directed="1"/>
      <edge id="5880" label="Q9CPP6 (pp) Q8K3J1" source="4219" target="4342" cy:directed="1"/>
      <edge id="5879" label="Q9CPP6 (pp) Q91VD9" source="4219" target="4203" cy:directed="1"/>
      <edge id="5878" label="Q9CPP6 (pp) Q9CQZ6" source="4219" target="4169" cy:directed="1"/>
      <edge id="5877" label="Q9CPP6 (pp) Q9ERS2" source="4219" target="4277" cy:directed="1"/>
      <edge id="5876" label="Q9CPP6 (pp) Q99LY9" source="4219" target="4190" cy:directed="1"/>
      <edge id="5875" label="Q9CPP6 (pp) Q9DCJ5" source="4219" target="4318" cy:directed="1"/>
      <edge id="5874" label="Q9CPP6 (pp) P48771" source="4219" target="4241" cy:directed="1"/>
      <edge id="5873" label="Q9CPP6 (pp) Q9DCX2" source="4219" target="4304" cy:directed="1"/>
      <edge id="5872" label="Q9CPP6 (pp) Q9DB77" source="4219" target="4343" cy:directed="1"/>
      <edge id="5871" label="Q9CPP6 (pp) Q9D6J6" source="4219" target="4145" cy:directed="1"/>
      <edge id="5870" label="Q9DCW4 (pp) P50544" source="4218" target="4397" cy:directed="1"/>
      <edge id="5869" label="Q9DCW4 (pp) Q8R4N0" source="4218" target="4289" cy:directed="1"/>
      <edge id="5868" label="Q9DCW4 (pp) Q9DC70" source="4218" target="4210" cy:directed="1"/>
      <edge id="5867" label="Q9DCW4 (pp) Q8QZT1" source="4218" target="4495" cy:directed="1"/>
      <edge id="5866" label="Q9DCW4 (pp) Q9D0S9" source="4218" target="4211" cy:directed="1"/>
      <edge id="5865" label="Q9DCW4 (pp) Q9D6J6" source="4218" target="4145" cy:directed="1"/>
      <edge id="5864" label="Q9DCW4 (pp) Q9Z1P6" source="4218" target="4237" cy:directed="1"/>
      <edge id="5863" label="Q9DCW4 (pp) Q61425" source="4218" target="4252" cy:directed="1"/>
      <edge id="5862" label="Q9DCW4 (pp) Q9DCS9" source="4218" target="4204" cy:directed="1"/>
      <edge id="5861" label="Q9DCW4 (pp) Q8BWT1" source="4218" target="4249" cy:directed="1"/>
      <edge id="5860" label="Q9DCW4 (pp) O08756" source="4218" target="4321" cy:directed="1"/>
      <edge id="5859" label="Q9DCW4 (pp) Q9JHI5" source="4218" target="4391" cy:directed="1"/>
      <edge id="5858" label="Q9DCW4 (pp) Q9DCT2" source="4218" target="4171" cy:directed="1"/>
      <edge id="5857" label="Q9DCW4 (pp) Q8BH95" source="4218" target="4186" cy:directed="1"/>
      <edge id="5856" label="Q9DCW4 (pp) Q9CQJ8" source="4218" target="4208" cy:directed="1"/>
      <edge id="5855" label="Q9DCW4 (pp) P52503" source="4218" target="4290" cy:directed="1"/>
      <edge id="5854" label="Q9DCW4 (pp) Q99LC5" source="4218" target="4253" cy:directed="1"/>
      <edge id="5853" label="Q9DCW4 (pp) Q9DC69" source="4218" target="4345" cy:directed="1"/>
      <edge id="5852" label="Q9DCW4 (pp) P19783" source="4218" target="4183" cy:directed="1"/>
      <edge id="5851" label="Q9DCW4 (pp) Q80U28" source="4218" target="4597" cy:directed="1"/>
      <edge id="5850" label="Q9DCW4 (pp) Q99LC3" source="4218" target="4189" cy:directed="1"/>
      <edge id="5849" label="Q9DCW4 (pp) Q921G7" source="4218" target="4248" cy:directed="1"/>
      <edge id="5848" label="Q9DCW4 (pp) Q9DBL1" source="4218" target="4389" cy:directed="1"/>
      <edge id="5847" label="Q9DCW4 (pp) P42125" source="4218" target="4457" cy:directed="1"/>
      <edge id="5846" label="Q9DCW4 (pp) Q9WUM5" source="4218" target="4214" cy:directed="1"/>
      <edge id="5845" label="Q9DCW4 (pp) Q91Z53" source="4218" target="4273" cy:directed="1"/>
      <edge id="5844" label="Q9DCW4 (pp) P17751" source="4218" target="4235" cy:directed="1"/>
      <edge id="5843" label="Q9DCW4 (pp) P08249" source="4218" target="4173" cy:directed="1"/>
      <edge id="5842" label="Q9DCW4 (pp) Q8K3J1" source="4218" target="4342" cy:directed="1"/>
      <edge id="5841" label="Q9DCW4 (pp) Q8BMS1" source="4218" target="4454" cy:directed="1"/>
      <edge id="5840" label="Q9DCW4 (pp) Q9ERS2" source="4218" target="4277" cy:directed="1"/>
      <edge id="5839" label="Q9DCW4 (pp) Q91YT0" source="4218" target="4317" cy:directed="1"/>
      <edge id="5838" label="Q9DCW4 (pp) Q9D6J5" source="4218" target="4425" cy:directed="1"/>
      <edge id="5837" label="Q9DCW4 (pp) O09111" source="4218" target="4149" cy:directed="1"/>
      <edge id="5836" label="Q9DCW4 (pp) Q06185" source="4218" target="4209" cy:directed="1"/>
      <edge id="5835" label="Q9DCW4 (pp) Q9Z2I9" source="4218" target="4396" cy:directed="1"/>
      <edge id="5834" label="Q9DCW4 (pp) Q9CQA3" source="4218" target="4250" cy:directed="1"/>
      <edge id="5833" label="Q9DCW4 (pp) Q8JZN5" source="4218" target="4332" cy:directed="1"/>
      <edge id="5832" label="Q9DCW4 (pp) Q9D3D9" source="4218" target="4148" cy:directed="1"/>
      <edge id="5831" label="Q9DCW4 (pp) Q9DB20" source="4218" target="4177" cy:directed="1"/>
      <edge id="5830" label="Q9DCW4 (pp) P51174" source="4218" target="4330" cy:directed="1"/>
      <edge id="5829" label="Q9DCW4 (pp) P56391" source="4218" target="4269" cy:directed="1"/>
      <edge id="5828" label="Q9DCW4 (pp) Q9DCJ5" source="4218" target="4318" cy:directed="1"/>
      <edge id="5827" label="Q9DCW4 (pp) Q9CPP6" source="4218" target="4219" cy:directed="1"/>
      <edge id="5826" label="P63037 (pp) Q61699" source="4217" target="4656" cy:directed="1"/>
      <edge id="5825" label="P63037 (pp) Q91VR2" source="4217" target="4201" cy:directed="1"/>
      <edge id="5824" label="Q9CQN1 (pp) P63038" source="4216" target="4185" cy:directed="1"/>
      <edge id="5823" label="Q9CQN1 (pp) Q91YT0" source="4216" target="4317" cy:directed="1"/>
      <edge id="5822" label="Q9CQN1 (pp) Q8K3J1" source="4216" target="4342" cy:directed="1"/>
      <edge id="5821" label="Q9CQN1 (pp) P63037" source="4216" target="4217" cy:directed="1"/>
      <edge id="5820" label="Q9WUM5 (pp) Q8VEM8" source="4214" target="4287" cy:directed="1"/>
      <edge id="5819" label="Q9WUM5 (pp) Q60931" source="4214" target="4494" cy:directed="1"/>
      <edge id="5818" label="Q9WUM5 (pp) Q9CQH3" source="4214" target="4178" cy:directed="1"/>
      <edge id="5817" label="Q9WUM5 (pp) Q9ERS2" source="4214" target="4277" cy:directed="1"/>
      <edge id="5816" label="Q9WUM5 (pp) Q99LX0" source="4214" target="4255" cy:directed="1"/>
      <edge id="5815" label="Q9WUM5 (pp) Q60597" source="4214" target="4449" cy:directed="1"/>
      <edge id="5814" label="Q9WUM5 (pp) Q99JY0" source="4214" target="4322" cy:directed="1"/>
      <edge id="5813" label="Q9WUM5 (pp) Q91VR2" source="4214" target="4201" cy:directed="1"/>
      <edge id="5812" label="Q9WUM5 (pp) Q9D6J6" source="4214" target="4145" cy:directed="1"/>
      <edge id="5811" label="Q9WUM5 (pp) P06151" source="4214" target="4176" cy:directed="1"/>
      <edge id="5810" label="Q9WUM5 (pp) Q9DCJ5" source="4214" target="4318" cy:directed="1"/>
      <edge id="5809" label="Q9WUM5 (pp) Q9CQQ7" source="4214" target="4347" cy:directed="1"/>
      <edge id="5808" label="Q9WUM5 (pp) Q9DC69" source="4214" target="4345" cy:directed="1"/>
      <edge id="5807" label="Q9WUM5 (pp) Q9D0K2" source="4214" target="4215" cy:directed="1"/>
      <edge id="5806" label="Q9Z1G4 (pp) Q62277" source="4213" target="4292" cy:directed="1"/>
      <edge id="5805" label="Q9Z1G4 (pp) P63082" source="4213" target="4386" cy:directed="1"/>
      <edge id="5804" label="Q9Z1G4 (pp) Q9WTT4" source="4213" target="4427" cy:directed="1"/>
      <edge id="5803" label="Q9Z1G4 (pp) P50516" source="4213" target="4231" cy:directed="1"/>
      <edge id="5802" label="Q9D1K2 (pp) P50518" source="4212" target="4307" cy:directed="1"/>
      <edge id="5801" label="Q9D1K2 (pp) P57746" source="4212" target="4230" cy:directed="1"/>
      <edge id="5800" label="Q9D1K2 (pp) Q8BVE3" source="4212" target="4308" cy:directed="1"/>
      <edge id="5799" label="Q9D1K2 (pp) Q9Z1P6" source="4212" target="4237" cy:directed="1"/>
      <edge id="5798" label="Q9D1K2 (pp) Q91VM9" source="4212" target="4344" cy:directed="1"/>
      <edge id="5797" label="Q9D1K2 (pp) P50516" source="4212" target="4231" cy:directed="1"/>
      <edge id="5796" label="Q9D1K2 (pp) Q9CQ75" source="4212" target="4327" cy:directed="1"/>
      <edge id="5795" label="Q9D1K2 (pp) P51863" source="4212" target="4161" cy:directed="1"/>
      <edge id="5794" label="Q9D1K2 (pp) Q9CQZ5" source="4212" target="4144" cy:directed="1"/>
      <edge id="5793" label="Q9D1K2 (pp) Q9WTT4" source="4212" target="4427" cy:directed="1"/>
      <edge id="5792" label="Q9D1K2 (pp) Q9Z1G3" source="4212" target="4162" cy:directed="1"/>
      <edge id="5791" label="Q9D1K2 (pp) Q8K3J1" source="4212" target="4342" cy:directed="1"/>
      <edge id="5790" label="Q9D1K2 (pp) P63082" source="4212" target="4386" cy:directed="1"/>
      <edge id="5789" label="Q9D1K2 (pp) P62814" source="4212" target="4264" cy:directed="1"/>
      <edge id="5788" label="Q9D1K2 (pp) Q9Z1G4" source="4212" target="4213" cy:directed="1"/>
      <edge id="5787" label="Q9D0S9 (pp) O08756" source="4211" target="4321" cy:directed="1"/>
      <edge id="5786" label="Q9D0S9 (pp) Q91Z53" source="4211" target="4273" cy:directed="1"/>
      <edge id="5785" label="Q9DC70 (pp) Q9DC69" source="4210" target="4345" cy:directed="1"/>
      <edge id="5784" label="Q9DC70 (pp) Q9CXZ1" source="4210" target="4334" cy:directed="1"/>
      <edge id="5783" label="Q9DC70 (pp) Q06185" source="4210" target="4209" cy:directed="1"/>
      <edge id="5782" label="Q9DC70 (pp) Q9D6J6" source="4210" target="4145" cy:directed="1"/>
      <edge id="5781" label="Q9DC70 (pp) Q9CZ13" source="4210" target="4187" cy:directed="1"/>
      <edge id="5780" label="Q9DC70 (pp) Q91VT4" source="4210" target="4692" cy:directed="1"/>
      <edge id="5779" label="Q9DC70 (pp) Q91VD9" source="4210" target="4203" cy:directed="1"/>
      <edge id="5778" label="Q9DC70 (pp) P19783" source="4210" target="4183" cy:directed="1"/>
      <edge id="5777" label="Q9DC70 (pp) Q91Z53" source="4210" target="4273" cy:directed="1"/>
      <edge id="5776" label="Q9DC70 (pp) Q91VR2" source="4210" target="4201" cy:directed="1"/>
      <edge id="5775" label="Q9DC70 (pp) Q9DCS9" source="4210" target="4204" cy:directed="1"/>
      <edge id="5774" label="Q9DC70 (pp) Q9D3D9" source="4210" target="4148" cy:directed="1"/>
      <edge id="5773" label="Q9DC70 (pp) O08756" source="4210" target="4321" cy:directed="1"/>
      <edge id="5772" label="Q9DC70 (pp) O09111" source="4210" target="4149" cy:directed="1"/>
      <edge id="5771" label="Q9DC70 (pp) Q9CQ69" source="4210" target="4172" cy:directed="1"/>
      <edge id="5770" label="Q9DC70 (pp) Q8K3J1" source="4210" target="4342" cy:directed="1"/>
      <edge id="5769" label="Q9DC70 (pp) Q9CQJ8" source="4210" target="4208" cy:directed="1"/>
      <edge id="5768" label="Q9DC70 (pp) Q9ERS2" source="4210" target="4277" cy:directed="1"/>
      <edge id="5767" label="Q9DC70 (pp) P70404" source="4210" target="4232" cy:directed="1"/>
      <edge id="5766" label="Q9DC70 (pp) P56480" source="4210" target="4196" cy:directed="1"/>
      <edge id="5765" label="Q9DC70 (pp) Q9CPP6" source="4210" target="4219" cy:directed="1"/>
      <edge id="5764" label="Q9DC70 (pp) Q91YT0" source="4210" target="4317" cy:directed="1"/>
      <edge id="5763" label="Q9DC70 (pp) Q9CR68" source="4210" target="4205" cy:directed="1"/>
      <edge id="5762" label="Q9DC70 (pp) Q3UIU2" source="4210" target="4226" cy:directed="1"/>
      <edge id="5761" label="Q9DC70 (pp) Q9DB20" source="4210" target="4177" cy:directed="1"/>
      <edge id="5760" label="Q9DC70 (pp) Q9D855" source="4210" target="4341" cy:directed="1"/>
      <edge id="5759" label="Q9DC70 (pp) Q9DCX2" source="4210" target="4304" cy:directed="1"/>
      <edge id="5758" label="Q9DC70 (pp) Q9DCJ5" source="4210" target="4318" cy:directed="1"/>
      <edge id="5757" label="Q9DC70 (pp) Q9D0M3" source="4210" target="4188" cy:directed="1"/>
      <edge id="5756" label="Q9DC70 (pp) P17751" source="4210" target="4235" cy:directed="1"/>
      <edge id="5755" label="Q9DC70 (pp) Q99KI0" source="4210" target="4276" cy:directed="1"/>
      <edge id="5754" label="Q9DC70 (pp) Q99LC3" source="4210" target="4189" cy:directed="1"/>
      <edge id="5753" label="Q9DC70 (pp) P97450" source="4210" target="4368" cy:directed="1"/>
      <edge id="5752" label="Q9DC70 (pp) P52503" source="4210" target="4290" cy:directed="1"/>
      <edge id="5751" label="Q9DC70 (pp) P56391" source="4210" target="4269" cy:directed="1"/>
      <edge id="5750" label="Q9DC70 (pp) Q9CQH3" source="4210" target="4178" cy:directed="1"/>
      <edge id="5749" label="Q9DC70 (pp) P42125" source="4210" target="4457" cy:directed="1"/>
      <edge id="5748" label="Q9DC70 (pp) Q9Z1P6" source="4210" target="4237" cy:directed="1"/>
      <edge id="5747" label="Q9DC70 (pp) P62073" source="4210" target="4293" cy:directed="1"/>
      <edge id="5746" label="Q9DC70 (pp) Q8K2B3" source="4210" target="4285" cy:directed="1"/>
      <edge id="5745" label="Q9DC70 (pp) Q9CQZ5" source="4210" target="4144" cy:directed="1"/>
      <edge id="5744" label="Q9DC70 (pp) Q03265" source="4210" target="4150" cy:directed="1"/>
      <edge id="5743" label="Q9DC70 (pp) Q9D0S9" source="4210" target="4211" cy:directed="1"/>
      <edge id="5742" label="Q06185 (pp) P03930" source="4209" target="4326" cy:directed="1"/>
      <edge id="5741" label="Q06185 (pp) Q9DCX2" source="4209" target="4304" cy:directed="1"/>
      <edge id="5740" label="Q06185 (pp) Q9CQQ7" source="4209" target="4347" cy:directed="1"/>
      <edge id="5739" label="Q06185 (pp) Q9ERS2" source="4209" target="4277" cy:directed="1"/>
      <edge id="5738" label="Q06185 (pp) Q9D3D9" source="4209" target="4148" cy:directed="1"/>
      <edge id="5737" label="Q06185 (pp) Q91VR2" source="4209" target="4201" cy:directed="1"/>
      <edge id="5736" label="Q06185 (pp) Q8K3J1" source="4209" target="4342" cy:directed="1"/>
      <edge id="5735" label="Q06185 (pp) O09111" source="4209" target="4149" cy:directed="1"/>
      <edge id="5734" label="Q06185 (pp) Q9CQ69" source="4209" target="4172" cy:directed="1"/>
      <edge id="5733" label="Q06185 (pp) Q9DCJ5" source="4209" target="4318" cy:directed="1"/>
      <edge id="5732" label="Q06185 (pp) P56391" source="4209" target="4269" cy:directed="1"/>
      <edge id="5731" label="Q06185 (pp) Q9CQH3" source="4209" target="4178" cy:directed="1"/>
      <edge id="5730" label="Q06185 (pp) Q9D6J6" source="4209" target="4145" cy:directed="1"/>
      <edge id="5729" label="Q06185 (pp) Q99LY9" source="4209" target="4190" cy:directed="1"/>
      <edge id="5728" label="Q9CQJ8 (pp) Q9CQQ7" source="4208" target="4347" cy:directed="1"/>
      <edge id="5727" label="Q9CQJ8 (pp) Q9DCS9" source="4208" target="4204" cy:directed="1"/>
      <edge id="5726" label="Q9CQJ8 (pp) P62073" source="4208" target="4293" cy:directed="1"/>
      <edge id="5725" label="Q9CQJ8 (pp) P99029" source="4208" target="4294" cy:directed="1"/>
      <edge id="5724" label="Q9CQJ8 (pp) Q9D3D9" source="4208" target="4148" cy:directed="1"/>
      <edge id="5723" label="Q9CQJ8 (pp) Q91VD9" source="4208" target="4203" cy:directed="1"/>
      <edge id="5722" label="Q9CQJ8 (pp) Q9D6J5" source="4208" target="4425" cy:directed="1"/>
      <edge id="5721" label="Q9CQJ8 (pp) Q91VR2" source="4208" target="4201" cy:directed="1"/>
      <edge id="5720" label="Q9CQJ8 (pp) Q9DCX2" source="4208" target="4304" cy:directed="1"/>
      <edge id="5719" label="Q9CQJ8 (pp) Q8K3J1" source="4208" target="4342" cy:directed="1"/>
      <edge id="5718" label="Q9CQJ8 (pp) Q99LY9" source="4208" target="4190" cy:directed="1"/>
      <edge id="5717" label="Q9CQJ8 (pp) Q9CQH3" source="4208" target="4178" cy:directed="1"/>
      <edge id="5716" label="Q9CQJ8 (pp) Q9CR68" source="4208" target="4205" cy:directed="1"/>
      <edge id="5715" label="Q9CQJ8 (pp) Q62425" source="4208" target="4483" cy:directed="1"/>
      <edge id="5714" label="Q9CQJ8 (pp) Q03265" source="4208" target="4150" cy:directed="1"/>
      <edge id="5713" label="Q9CQJ8 (pp) Q8VEM8" source="4208" target="4287" cy:directed="1"/>
      <edge id="5712" label="Q9CQJ8 (pp) Q99LC5" source="4208" target="4253" cy:directed="1"/>
      <edge id="5711" label="Q9CQJ8 (pp) Q9CQZ5" source="4208" target="4144" cy:directed="1"/>
      <edge id="5710" label="Q9CQJ8 (pp) Q8K1Z0" source="4208" target="4257" cy:directed="1"/>
      <edge id="5709" label="Q9CQJ8 (pp) Q9CQC7" source="4208" target="4432" cy:directed="1"/>
      <edge id="5708" label="Q9CQJ8 (pp) P43024" source="4208" target="4410" cy:directed="1"/>
      <edge id="5707" label="Q9CQJ8 (pp) Q9CPQ8" source="4208" target="4202" cy:directed="1"/>
      <edge id="5706" label="Q9CQJ8 (pp) Q9CPP6" source="4208" target="4219" cy:directed="1"/>
      <edge id="5705" label="Q9CQJ8 (pp) Q99LC3" source="4208" target="4189" cy:directed="1"/>
      <edge id="5704" label="Q9CQJ8 (pp) Q91YT0" source="4208" target="4317" cy:directed="1"/>
      <edge id="5703" label="Q9CQJ8 (pp) Q99KI0" source="4208" target="4276" cy:directed="1"/>
      <edge id="5702" label="Q9CQJ8 (pp) Q9ERS2" source="4208" target="4277" cy:directed="1"/>
      <edge id="5701" label="Q9CQJ8 (pp) Q9CQZ6" source="4208" target="4169" cy:directed="1"/>
      <edge id="5700" label="Q9CQJ8 (pp) Q9D023" source="4208" target="4354" cy:directed="1"/>
      <edge id="5699" label="Q9CQJ8 (pp) P97807" source="4208" target="4278" cy:directed="1"/>
      <edge id="5698" label="Q9CQJ8 (pp) Q9CZ13" source="4208" target="4187" cy:directed="1"/>
      <edge id="5697" label="Q9CQJ8 (pp) P97450" source="4208" target="4368" cy:directed="1"/>
      <edge id="5696" label="Q9CQJ8 (pp) Q9CQ54" source="4208" target="4170" cy:directed="1"/>
      <edge id="5695" label="Q9CQJ8 (pp) Q9D6J6" source="4208" target="4145" cy:directed="1"/>
      <edge id="5694" label="Q9CQJ8 (pp) Q9D0M3" source="4208" target="4188" cy:directed="1"/>
      <edge id="5693" label="Q9CQJ8 (pp) P48771" source="4208" target="4241" cy:directed="1"/>
      <edge id="5692" label="Q9CQJ8 (pp) Q9DCJ5" source="4208" target="4318" cy:directed="1"/>
      <edge id="5691" label="Q9CQJ8 (pp) Q9CQ69" source="4208" target="4172" cy:directed="1"/>
      <edge id="5690" label="Q9CQJ8 (pp) Q9DB20" source="4208" target="4177" cy:directed="1"/>
      <edge id="5689" label="Q9CQJ8 (pp) O09111" source="4208" target="4149" cy:directed="1"/>
      <edge id="5688" label="Q9CQJ8 (pp) Q9DC69" source="4208" target="4345" cy:directed="1"/>
      <edge id="5687" label="Q9CQJ8 (pp) Q9Z1P6" source="4208" target="4237" cy:directed="1"/>
      <edge id="5686" label="Q9CQJ8 (pp) Q9DB77" source="4208" target="4343" cy:directed="1"/>
      <edge id="5685" label="Q9CQJ8 (pp) P19783" source="4208" target="4183" cy:directed="1"/>
      <edge id="5684" label="Q9CQJ8 (pp) Q06185" source="4208" target="4209" cy:directed="1"/>
      <edge id="5683" label="P05132 (pp) P35438" source="4207" target="4153" cy:directed="1"/>
      <edge id="5682" label="P05132 (pp) P31324" source="4207" target="4437" cy:directed="1"/>
      <edge id="5681" label="P05132 (pp) P12367" source="4207" target="4355" cy:directed="1"/>
      <edge id="5680" label="Q9CR68 (pp) O35658" source="4205" target="4302" cy:directed="1"/>
      <edge id="5679" label="Q9CR68 (pp) Q9CQH3" source="4205" target="4178" cy:directed="1"/>
      <edge id="5678" label="Q9CR68 (pp) Q91VR2" source="4205" target="4201" cy:directed="1"/>
      <edge id="5677" label="Q9CR68 (pp) Q8VEM8" source="4205" target="4287" cy:directed="1"/>
      <edge id="5676" label="Q9CR68 (pp) Q9DCX2" source="4205" target="4304" cy:directed="1"/>
      <edge id="5675" label="Q9CR68 (pp) O09111" source="4205" target="4149" cy:directed="1"/>
      <edge id="5674" label="Q9CR68 (pp) Q9DC69" source="4205" target="4345" cy:directed="1"/>
      <edge id="5673" label="Q9CR68 (pp) Q9D6J6" source="4205" target="4145" cy:directed="1"/>
      <edge id="5672" label="Q9CR68 (pp) P62897" source="4205" target="4224" cy:directed="1"/>
      <edge id="5671" label="Q9CR68 (pp) O88441" source="4205" target="4233" cy:directed="1"/>
      <edge id="5670" label="Q9CR68 (pp) Q9CQ69" source="4205" target="4172" cy:directed="1"/>
      <edge id="5669" label="Q9CR68 (pp) P56391" source="4205" target="4269" cy:directed="1"/>
      <edge id="5668" label="Q9CR68 (pp) P00405" source="4205" target="4607" cy:directed="1"/>
      <edge id="5667" label="Q9CR68 (pp) Q9D3D9" source="4205" target="4148" cy:directed="1"/>
      <edge id="5666" label="Q9CR68 (pp) Q9ERS2" source="4205" target="4277" cy:directed="1"/>
      <edge id="5665" label="Q9CR68 (pp) Q9WUM5" source="4205" target="4214" cy:directed="1"/>
      <edge id="5664" label="Q9CR68 (pp) Q9DCJ5" source="4205" target="4318" cy:directed="1"/>
      <edge id="5663" label="Q9CR68 (pp) Q8K3J1" source="4205" target="4342" cy:directed="1"/>
      <edge id="5662" label="Q9CR68 (pp) Q9CQQ7" source="4205" target="4347" cy:directed="1"/>
      <edge id="5661" label="Q9CR68 (pp) Q06185" source="4205" target="4209" cy:directed="1"/>
      <edge id="5660" label="Q9CR68 (pp) Q9D2G2" source="4205" target="4225" cy:directed="1"/>
      <edge id="5659" label="Q9CR68 (pp) P43024" source="4205" target="4410" cy:directed="1"/>
      <edge id="5658" label="Q9DCS9 (pp) O09111" source="4204" target="4149" cy:directed="1"/>
      <edge id="5657" label="Q9DCS9 (pp) Q9CQH3" source="4204" target="4178" cy:directed="1"/>
      <edge id="5656" label="Q9DCS9 (pp) Q9DCJ5" source="4204" target="4318" cy:directed="1"/>
      <edge id="5655" label="Q9DCS9 (pp) Q8K3J1" source="4204" target="4342" cy:directed="1"/>
      <edge id="5654" label="Q9DCS9 (pp) Q9CQ69" source="4204" target="4172" cy:directed="1"/>
      <edge id="5653" label="Q9DCS9 (pp) Q9ERS2" source="4204" target="4277" cy:directed="1"/>
      <edge id="5652" label="Q9DCS9 (pp) Q9D6J6" source="4204" target="4145" cy:directed="1"/>
      <edge id="5651" label="Q9DCS9 (pp) Q9DCX2" source="4204" target="4304" cy:directed="1"/>
      <edge id="5650" label="Q9DCS9 (pp) Q9D3D9" source="4204" target="4148" cy:directed="1"/>
      <edge id="5649" label="Q9DCS9 (pp) Q9CPQ8" source="4204" target="4202" cy:directed="1"/>
      <edge id="5648" label="Q9DCS9 (pp) Q06185" source="4204" target="4209" cy:directed="1"/>
      <edge id="5647" label="Q9DCS9 (pp) Q9CQQ7" source="4204" target="4347" cy:directed="1"/>
      <edge id="5646" label="Q9DCS9 (pp) Q9DC69" source="4204" target="4345" cy:directed="1"/>
      <edge id="5645" label="Q9DCS9 (pp) Q9CR68" source="4204" target="4205" cy:directed="1"/>
      <edge id="5644" label="Q91VD9 (pp) Q9D6J6" source="4203" target="4145" cy:directed="1"/>
      <edge id="5643" label="Q91VD9 (pp) Q9CQZ6" source="4203" target="4169" cy:directed="1"/>
      <edge id="5642" label="Q91VD9 (pp) Q9D2G2" source="4203" target="4225" cy:directed="1"/>
      <edge id="5641" label="Q91VD9 (pp) O09111" source="4203" target="4149" cy:directed="1"/>
      <edge id="5640" label="Q91VD9 (pp) Q9CQ69" source="4203" target="4172" cy:directed="1"/>
      <edge id="5639" label="Q91VD9 (pp) Q91VR2" source="4203" target="4201" cy:directed="1"/>
      <edge id="5638" label="Q91VD9 (pp) Q9CQH3" source="4203" target="4178" cy:directed="1"/>
      <edge id="5637" label="Q91VD9 (pp) Q9CR68" source="4203" target="4205" cy:directed="1"/>
      <edge id="5636" label="Q91VD9 (pp) Q9WUM5" source="4203" target="4214" cy:directed="1"/>
      <edge id="5635" label="Q91VD9 (pp) Q9DCS9" source="4203" target="4204" cy:directed="1"/>
      <edge id="5634" label="Q91VD9 (pp) Q6PB66" source="4203" target="4436" cy:directed="1"/>
      <edge id="5633" label="Q91VD9 (pp) Q99LC3" source="4203" target="4189" cy:directed="1"/>
      <edge id="5632" label="Q91VD9 (pp) Q9DB77" source="4203" target="4343" cy:directed="1"/>
      <edge id="5631" label="Q91VD9 (pp) P97807" source="4203" target="4278" cy:directed="1"/>
      <edge id="5630" label="Q91VD9 (pp) Q9CQQ7" source="4203" target="4347" cy:directed="1"/>
      <edge id="5629" label="Q91VD9 (pp) Q9CQ54" source="4203" target="4170" cy:directed="1"/>
      <edge id="5628" label="Q91VD9 (pp) Q9DCJ5" source="4203" target="4318" cy:directed="1"/>
      <edge id="5627" label="Q91VD9 (pp) Q8BMF4" source="4203" target="4191" cy:directed="1"/>
      <edge id="5626" label="Q91VD9 (pp) Q9Z1P6" source="4203" target="4237" cy:directed="1"/>
      <edge id="5625" label="Q91VD9 (pp) Q8K3J1" source="4203" target="4342" cy:directed="1"/>
      <edge id="5624" label="Q91VD9 (pp) Q99LC5" source="4203" target="4253" cy:directed="1"/>
      <edge id="5623" label="Q91VD9 (pp) Q3UIU2" source="4203" target="4226" cy:directed="1"/>
      <edge id="5622" label="Q91VD9 (pp) Q99LY9" source="4203" target="4190" cy:directed="1"/>
      <edge id="5621" label="Q91VD9 (pp) Q91YT0" source="4203" target="4317" cy:directed="1"/>
      <edge id="5620" label="Q91VD9 (pp) Q9DC69" source="4203" target="4345" cy:directed="1"/>
      <edge id="5619" label="Q91VD9 (pp) Q9ERS2" source="4203" target="4277" cy:directed="1"/>
      <edge id="5618" label="Q9CPQ8 (pp) Q9D6J6" source="4202" target="4145" cy:directed="1"/>
      <edge id="5617" label="Q9CPQ8 (pp) Q9CQH3" source="4202" target="4178" cy:directed="1"/>
      <edge id="5616" label="Q91VR2 (pp) Q9D6J6" source="4201" target="4145" cy:directed="1"/>
      <edge id="5615" label="Q91VR2 (pp) Q9CQH3" source="4201" target="4178" cy:directed="1"/>
      <edge id="5614" label="Q91VR2 (pp) O09111" source="4201" target="4149" cy:directed="1"/>
      <edge id="5613" label="Q9JLJ2 (pp) P61922" source="4200" target="4262" cy:directed="1"/>
      <edge id="5612" label="Q9JLJ2 (pp) Q8BW75" source="4200" target="4611" cy:directed="1"/>
      <edge id="5611" label="Q9JLJ2 (pp) Q8CHT0" source="4200" target="4440" cy:directed="1"/>
      <edge id="5610" label="Q9JLJ2 (pp) Q61425" source="4200" target="4252" cy:directed="1"/>
      <edge id="5609" label="Q9JLJ2 (pp) Q9EQ20" source="4200" target="4300" cy:directed="1"/>
      <edge id="5608" label="Q9JLJ2 (pp) Q91VR2" source="4200" target="4201" cy:directed="1"/>
      <edge id="5607" label="P67778 (pp) P50516" source="4199" target="4231" cy:directed="1"/>
      <edge id="5606" label="P68404 (pp) P26645" source="4198" target="4643" cy:directed="1"/>
      <edge id="5605" label="P68404 (pp) P35438" source="4198" target="4153" cy:directed="1"/>
      <edge id="5604" label="P56480 (pp) Q03265" source="4196" target="4150" cy:directed="1"/>
      <edge id="5603" label="P56480 (pp) P97807" source="4196" target="4278" cy:directed="1"/>
      <edge id="5602" label="P56480 (pp) Q9CR68" source="4196" target="4205" cy:directed="1"/>
      <edge id="5601" label="P56480 (pp) Q91YT0" source="4196" target="4317" cy:directed="1"/>
      <edge id="5600" label="P56480 (pp) Q9CQQ7" source="4196" target="4347" cy:directed="1"/>
      <edge id="5599" label="P56480 (pp) Q9D6J6" source="4196" target="4145" cy:directed="1"/>
      <edge id="5598" label="P56480 (pp) Q91VD9" source="4196" target="4203" cy:directed="1"/>
      <edge id="5597" label="P56480 (pp) P16054" source="4196" target="4381" cy:directed="1"/>
      <edge id="5596" label="P56480 (pp) Q91VR2" source="4196" target="4201" cy:directed="1"/>
      <edge id="5595" label="P56480 (pp) Q8VEM8" source="4196" target="4287" cy:directed="1"/>
      <edge id="5594" label="P56480 (pp) Q9DCX2" source="4196" target="4304" cy:directed="1"/>
      <edge id="5593" label="P56480 (pp) P17182" source="4196" target="4453" cy:directed="1"/>
      <edge id="5592" label="P56480 (pp) Q8K3J1" source="4196" target="4342" cy:directed="1"/>
      <edge id="5591" label="P56480 (pp) Q99LC3" source="4196" target="4189" cy:directed="1"/>
      <edge id="5590" label="P56480 (pp) O35143" source="4196" target="4641" cy:directed="1"/>
      <edge id="5589" label="P56480 (pp) P15105" source="4196" target="4220" cy:directed="1"/>
      <edge id="5588" label="P56480 (pp) P56391" source="4196" target="4269" cy:directed="1"/>
      <edge id="5587" label="P56480 (pp) P00405" source="4196" target="4607" cy:directed="1"/>
      <edge id="5586" label="P56480 (pp) P62259" source="4196" target="4163" cy:directed="1"/>
      <edge id="5585" label="P56480 (pp) P19783" source="4196" target="4183" cy:directed="1"/>
      <edge id="5584" label="P56480 (pp) Q9CZ13" source="4196" target="4187" cy:directed="1"/>
      <edge id="5583" label="P56480 (pp) P17156" source="4196" target="4516" cy:directed="1"/>
      <edge id="5582" label="P56480 (pp) Q9WUM5" source="4196" target="4214" cy:directed="1"/>
      <edge id="5581" label="P56480 (pp) Q99LX0" source="4196" target="4255" cy:directed="1"/>
      <edge id="5580" label="P56480 (pp) Q06185" source="4196" target="4209" cy:directed="1"/>
      <edge id="5579" label="P56480 (pp) P03930" source="4196" target="4326" cy:directed="1"/>
      <edge id="5578" label="P56480 (pp) Q60864" source="4196" target="4312" cy:directed="1"/>
      <edge id="5577" label="P56480 (pp) Q9D3D9" source="4196" target="4148" cy:directed="1"/>
      <edge id="5576" label="P56480 (pp) P09103" source="4196" target="4412" cy:directed="1"/>
      <edge id="5575" label="P56480 (pp) P50516" source="4196" target="4231" cy:directed="1"/>
      <edge id="5574" label="P56480 (pp) P63038" source="4196" target="4185" cy:directed="1"/>
      <edge id="5573" label="P56480 (pp) Q9D2G2" source="4196" target="4225" cy:directed="1"/>
      <edge id="5572" label="P56480 (pp) P17742" source="4196" target="4197" cy:directed="1"/>
      <edge id="5571" label="Q61598 (pp) P62821" source="4195" target="4586" cy:directed="1"/>
      <edge id="5570" label="Q61598 (pp) Q99PT1" source="4195" target="4371" cy:directed="1"/>
      <edge id="5569" label="Q61598 (pp) P63011" source="4195" target="4485" cy:directed="1"/>
      <edge id="5568" label="Q61598 (pp) Q91VR2" source="4195" target="4201" cy:directed="1"/>
      <edge id="5567" label="P61027 (pp) Q61598" source="4194" target="4195" cy:directed="1"/>
      <edge id="5566" label="P63085 (pp) P07901" source="4193" target="4446" cy:directed="1"/>
      <edge id="5565" label="P63085 (pp) Q64010" source="4193" target="4367" cy:directed="1"/>
      <edge id="5564" label="P63085 (pp) P35438" source="4193" target="4153" cy:directed="1"/>
      <edge id="5563" label="Q05920 (pp) P15105" source="4192" target="4220" cy:directed="1"/>
      <edge id="5562" label="Q05920 (pp) P06151" source="4192" target="4176" cy:directed="1"/>
      <edge id="5561" label="Q8BMF4 (pp) Q922H2" source="4191" target="4629" cy:directed="1"/>
      <edge id="5560" label="Q8BMF4 (pp) Q99JY0" source="4191" target="4322" cy:directed="1"/>
      <edge id="5559" label="Q8BMF4 (pp) Q9WUM5" source="4191" target="4214" cy:directed="1"/>
      <edge id="5558" label="Q8BMF4 (pp) P63101" source="4191" target="4417" cy:directed="1"/>
      <edge id="5557" label="Q8BMF4 (pp) Q9D2G2" source="4191" target="4225" cy:directed="1"/>
      <edge id="5556" label="Q8BMF4 (pp) Q8BWT1" source="4191" target="4249" cy:directed="1"/>
      <edge id="5555" label="Q8BMF4 (pp) Q05920" source="4191" target="4192" cy:directed="1"/>
      <edge id="5554" label="Q99LY9 (pp) Q9D6J6" source="4190" target="4145" cy:directed="1"/>
      <edge id="5553" label="Q99LY9 (pp) Q9CQH3" source="4190" target="4178" cy:directed="1"/>
      <edge id="5552" label="Q99LY9 (pp) Q9ERS2" source="4190" target="4277" cy:directed="1"/>
      <edge id="5551" label="Q99LC3 (pp) Q8K3J1" source="4189" target="4342" cy:directed="1"/>
      <edge id="5550" label="Q99LC3 (pp) Q9D3D9" source="4189" target="4148" cy:directed="1"/>
      <edge id="5549" label="Q99LC3 (pp) Q9DC69" source="4189" target="4345" cy:directed="1"/>
      <edge id="5548" label="Q99LC3 (pp) Q9CQ69" source="4189" target="4172" cy:directed="1"/>
      <edge id="5547" label="Q99LC3 (pp) Q9DCS9" source="4189" target="4204" cy:directed="1"/>
      <edge id="5546" label="Q99LC3 (pp) Q9CQ54" source="4189" target="4170" cy:directed="1"/>
      <edge id="5545" label="Q99LC3 (pp) Q91YT0" source="4189" target="4317" cy:directed="1"/>
      <edge id="5544" label="Q99LC3 (pp) Q9DB77" source="4189" target="4343" cy:directed="1"/>
      <edge id="5543" label="Q99LC3 (pp) Q9CQH3" source="4189" target="4178" cy:directed="1"/>
      <edge id="5542" label="Q99LC3 (pp) Q9D6J6" source="4189" target="4145" cy:directed="1"/>
      <edge id="5541" label="Q99LC3 (pp) O09111" source="4189" target="4149" cy:directed="1"/>
      <edge id="5540" label="Q99LC3 (pp) P50516" source="4189" target="4231" cy:directed="1"/>
      <edge id="5539" label="Q99LC3 (pp) Q9DCJ5" source="4189" target="4318" cy:directed="1"/>
      <edge id="5538" label="Q99LC3 (pp) Q9Z1P6" source="4189" target="4237" cy:directed="1"/>
      <edge id="5537" label="Q99LC3 (pp) Q99LY9" source="4189" target="4190" cy:directed="1"/>
      <edge id="5536" label="Q9D0M3 (pp) P56480" source="4188" target="4196" cy:directed="1"/>
      <edge id="5535" label="Q9D0M3 (pp) O35658" source="4188" target="4302" cy:directed="1"/>
      <edge id="5534" label="Q9D0M3 (pp) Q03265" source="4188" target="4150" cy:directed="1"/>
      <edge id="5533" label="Q9D0M3 (pp) Q9CPP6" source="4188" target="4219" cy:directed="1"/>
      <edge id="5532" label="Q9D0M3 (pp) P19783" source="4188" target="4183" cy:directed="1"/>
      <edge id="5531" label="Q9D0M3 (pp) P00405" source="4188" target="4607" cy:directed="1"/>
      <edge id="5530" label="Q9D0M3 (pp) Q9Z1P6" source="4188" target="4237" cy:directed="1"/>
      <edge id="5529" label="Q9D0M3 (pp) Q9CQH3" source="4188" target="4178" cy:directed="1"/>
      <edge id="5528" label="Q9D0M3 (pp) Q9CZ13" source="4188" target="4187" cy:directed="1"/>
      <edge id="5527" label="Q9D0M3 (pp) P48771" source="4188" target="4241" cy:directed="1"/>
      <edge id="5526" label="Q9D0M3 (pp) Q9DCJ5" source="4188" target="4318" cy:directed="1"/>
      <edge id="5525" label="Q9D0M3 (pp) Q9D2G2" source="4188" target="4225" cy:directed="1"/>
      <edge id="5524" label="Q9D0M3 (pp) Q9CQQ7" source="4188" target="4347" cy:directed="1"/>
      <edge id="5523" label="Q9D0M3 (pp) Q9DC69" source="4188" target="4345" cy:directed="1"/>
      <edge id="5522" label="Q9D0M3 (pp) P43024" source="4188" target="4410" cy:directed="1"/>
      <edge id="5521" label="Q9D0M3 (pp) Q99LX0" source="4188" target="4255" cy:directed="1"/>
      <edge id="5520" label="Q9D0M3 (pp) Q99LC3" source="4188" target="4189" cy:directed="1"/>
      <edge id="5519" label="Q9D0M3 (pp) P42125" source="4188" target="4457" cy:directed="1"/>
      <edge id="5518" label="Q9D0M3 (pp) Q8VEM8" source="4188" target="4287" cy:directed="1"/>
      <edge id="5517" label="Q9D0M3 (pp) P56391" source="4188" target="4269" cy:directed="1"/>
      <edge id="5516" label="Q9D0M3 (pp) Q64521" source="4188" target="4363" cy:directed="1"/>
      <edge id="5515" label="Q9D0M3 (pp) Q8K3J1" source="4188" target="4342" cy:directed="1"/>
      <edge id="5514" label="Q9D0M3 (pp) P62073" source="4188" target="4293" cy:directed="1"/>
      <edge id="5513" label="Q9D0M3 (pp) Q9D6J6" source="4188" target="4145" cy:directed="1"/>
      <edge id="5512" label="Q9D0M3 (pp) Q91YT0" source="4188" target="4317" cy:directed="1"/>
      <edge id="5511" label="Q9D0M3 (pp) Q9CR68" source="4188" target="4205" cy:directed="1"/>
      <edge id="5510" label="Q9D0M3 (pp) Q9DCX2" source="4188" target="4304" cy:directed="1"/>
      <edge id="5509" label="Q9D0M3 (pp) P50516" source="4188" target="4231" cy:directed="1"/>
      <edge id="5508" label="Q9D0M3 (pp) Q91VR2" source="4188" target="4201" cy:directed="1"/>
      <edge id="5507" label="Q9D0M3 (pp) P19536" source="4188" target="4311" cy:directed="1"/>
      <edge id="5506" label="Q9D0M3 (pp) Q9DB77" source="4188" target="4343" cy:directed="1"/>
      <edge id="5505" label="Q9D0M3 (pp) P17751" source="4188" target="4235" cy:directed="1"/>
      <edge id="5504" label="Q9D0M3 (pp) Q91VD9" source="4188" target="4203" cy:directed="1"/>
      <edge id="5503" label="Q9D0M3 (pp) Q9WUM5" source="4188" target="4214" cy:directed="1"/>
      <edge id="5502" label="Q9D0M3 (pp) Q06185" source="4188" target="4209" cy:directed="1"/>
      <edge id="5501" label="Q9D0M3 (pp) P97450" source="4188" target="4368" cy:directed="1"/>
      <edge id="5500" label="Q9D0M3 (pp) Q9CQ69" source="4188" target="4172" cy:directed="1"/>
      <edge id="5499" label="Q9D0M3 (pp) Q9CQZ6" source="4188" target="4169" cy:directed="1"/>
      <edge id="5498" label="Q9D0M3 (pp) Q9ERS2" source="4188" target="4277" cy:directed="1"/>
      <edge id="5497" label="Q9D0M3 (pp) Q9D3D9" source="4188" target="4148" cy:directed="1"/>
      <edge id="5496" label="Q9D0M3 (pp) P97807" source="4188" target="4278" cy:directed="1"/>
      <edge id="5495" label="Q9D0M3 (pp) O09111" source="4188" target="4149" cy:directed="1"/>
      <edge id="5494" label="Q9D0M3 (pp) P70404" source="4188" target="4232" cy:directed="1"/>
      <edge id="5493" label="Q9D0M3 (pp) P62897" source="4188" target="4224" cy:directed="1"/>
      <edge id="5492" label="Q9D0M3 (pp) Q9DB20" source="4188" target="4177" cy:directed="1"/>
      <edge id="5491" label="Q9CZ13 (pp) Q99LY9" source="4187" target="4190" cy:directed="1"/>
      <edge id="5490" label="Q9CZ13 (pp) Q9CR68" source="4187" target="4205" cy:directed="1"/>
      <edge id="5489" label="Q9CZ13 (pp) Q9DB77" source="4187" target="4343" cy:directed="1"/>
      <edge id="5488" label="Q9CZ13 (pp) Q9DC69" source="4187" target="4345" cy:directed="1"/>
      <edge id="5487" label="Q9CZ13 (pp) Q99P72" source="4187" target="4616" cy:directed="1"/>
      <edge id="5486" label="Q9CZ13 (pp) Q9CQH3" source="4187" target="4178" cy:directed="1"/>
      <edge id="5485" label="Q9CZ13 (pp) Q8K3J1" source="4187" target="4342" cy:directed="1"/>
      <edge id="5484" label="Q9CZ13 (pp) Q91VR2" source="4187" target="4201" cy:directed="1"/>
      <edge id="5483" label="Q9CZ13 (pp) Q9D6J6" source="4187" target="4145" cy:directed="1"/>
      <edge id="5482" label="Q9CZ13 (pp) P19783" source="4187" target="4183" cy:directed="1"/>
      <edge id="5481" label="Q9CZ13 (pp) Q9WUM5" source="4187" target="4214" cy:directed="1"/>
      <edge id="5480" label="Q9CZ13 (pp) Q9Z1P6" source="4187" target="4237" cy:directed="1"/>
      <edge id="5479" label="Q9CZ13 (pp) Q9DCJ5" source="4187" target="4318" cy:directed="1"/>
      <edge id="5478" label="Q9CZ13 (pp) Q9CQ69" source="4187" target="4172" cy:directed="1"/>
      <edge id="5477" label="Q9CZ13 (pp) Q60597" source="4187" target="4449" cy:directed="1"/>
      <edge id="5476" label="Q9CZ13 (pp) Q8K1Z0" source="4187" target="4257" cy:directed="1"/>
      <edge id="5475" label="Q9CZ13 (pp) O09111" source="4187" target="4149" cy:directed="1"/>
      <edge id="5474" label="Q9CZ13 (pp) Q91YT0" source="4187" target="4317" cy:directed="1"/>
      <edge id="5473" label="Q9CZ13 (pp) Q9D3D9" source="4187" target="4148" cy:directed="1"/>
      <edge id="5472" label="Q9CZ13 (pp) Q91VD9" source="4187" target="4203" cy:directed="1"/>
      <edge id="5471" label="Q9CZ13 (pp) P67778" source="4187" target="4199" cy:directed="1"/>
      <edge id="5470" label="Q9CZ13 (pp) P97807" source="4187" target="4278" cy:directed="1"/>
      <edge id="5469" label="Q9CZ13 (pp) Q9DCS9" source="4187" target="4204" cy:directed="1"/>
      <edge id="5468" label="Q9CZ13 (pp) Q9ERS2" source="4187" target="4277" cy:directed="1"/>
      <edge id="5467" label="Q8BH95 (pp) Q9DBL1" source="4186" target="4389" cy:directed="1"/>
      <edge id="5466" label="Q8BH95 (pp) Q9DC69" source="4186" target="4345" cy:directed="1"/>
      <edge id="5465" label="Q8BH95 (pp) Q99LC5" source="4186" target="4253" cy:directed="1"/>
      <edge id="5464" label="Q8BH95 (pp) Q9CQ62" source="4186" target="4223" cy:directed="1"/>
      <edge id="5463" label="Q8BH95 (pp) Q9WUM5" source="4186" target="4214" cy:directed="1"/>
      <edge id="5462" label="Q8BH95 (pp) Q9DCJ5" source="4186" target="4318" cy:directed="1"/>
      <edge id="5461" label="Q8BH95 (pp) Q99MR8" source="4186" target="4563" cy:directed="1"/>
      <edge id="5460" label="Q8BH95 (pp) Q99JY0" source="4186" target="4322" cy:directed="1"/>
      <edge id="5459" label="Q8BH95 (pp) Q61425" source="4186" target="4252" cy:directed="1"/>
      <edge id="5458" label="Q8BH95 (pp) O08756" source="4186" target="4321" cy:directed="1"/>
      <edge id="5457" label="Q8BH95 (pp) Q99MN9" source="4186" target="4372" cy:directed="1"/>
      <edge id="5456" label="Q8BH95 (pp) Q8BMS1" source="4186" target="4454" cy:directed="1"/>
      <edge id="5455" label="Q8BH95 (pp) Q9JHI5" source="4186" target="4391" cy:directed="1"/>
      <edge id="5454" label="Q8BH95 (pp) P50544" source="4186" target="4397" cy:directed="1"/>
      <edge id="5453" label="Q8BH95 (pp) P51174" source="4186" target="4330" cy:directed="1"/>
      <edge id="5452" label="Q8BH95 (pp) Q8QZT1" source="4186" target="4495" cy:directed="1"/>
      <edge id="5451" label="Q8BH95 (pp) Q8BWT1" source="4186" target="4249" cy:directed="1"/>
      <edge id="5450" label="Q8BH95 (pp) Q9CZ13" source="4186" target="4187" cy:directed="1"/>
      <edge id="5449" label="P63038 (pp) P97807" source="4185" target="4278" cy:directed="1"/>
      <edge id="5448" label="P63038 (pp) P67778" source="4185" target="4199" cy:directed="1"/>
      <edge id="5447" label="P63038 (pp) O35658" source="4185" target="4302" cy:directed="1"/>
      <edge id="5446" label="P63038 (pp) P17156" source="4185" target="4516" cy:directed="1"/>
      <edge id="5445" label="P63038 (pp) Q61699" source="4185" target="4656" cy:directed="1"/>
      <edge id="5444" label="P63038 (pp) Q91VR2" source="4185" target="4201" cy:directed="1"/>
      <edge id="5443" label="P63038 (pp) Q921G7" source="4185" target="4248" cy:directed="1"/>
      <edge id="5442" label="P63038 (pp) Q8CGK3" source="4185" target="4696" cy:directed="1"/>
      <edge id="5441" label="P63038 (pp) Q925I1" source="4185" target="4527" cy:directed="1"/>
      <edge id="5440" label="P63038 (pp) P63037" source="4185" target="4217" cy:directed="1"/>
      <edge id="5439" label="P63038 (pp) Q8BIJ6" source="4185" target="4665" cy:directed="1"/>
      <edge id="5438" label="P63038 (pp) Q6PB66" source="4185" target="4436" cy:directed="1"/>
      <edge id="5437" label="P63038 (pp) Q9Z0X1" source="4185" target="4488" cy:directed="1"/>
      <edge id="5436" label="P63038 (pp) Q9WUM5" source="4185" target="4214" cy:directed="1"/>
      <edge id="5435" label="P63038 (pp) P15105" source="4185" target="4220" cy:directed="1"/>
      <edge id="5434" label="P63038 (pp) P52480" source="4185" target="4393" cy:directed="1"/>
      <edge id="5433" label="P63038 (pp) Q99LC5" source="4185" target="4253" cy:directed="1"/>
      <edge id="5432" label="P63038 (pp) P09411" source="4185" target="4236" cy:directed="1"/>
      <edge id="5431" label="P63038 (pp) P52196" source="4185" target="4206" cy:directed="1"/>
      <edge id="5430" label="Q8BK64 (pp) P11499" source="4184" target="4258" cy:directed="1"/>
      <edge id="5429" label="Q8BK64 (pp) Q61699" source="4184" target="4656" cy:directed="1"/>
      <edge id="5428" label="Q8BK64 (pp) P07901" source="4184" target="4446" cy:directed="1"/>
      <edge id="5427" label="Q8BK64 (pp) Q60864" source="4184" target="4312" cy:directed="1"/>
      <edge id="5426" label="Q8BK64 (pp) P63038" source="4184" target="4185" cy:directed="1"/>
      <edge id="5425" label="P19783 (pp) Q9DC69" source="4183" target="4345" cy:directed="1"/>
      <edge id="5424" label="P19783 (pp) P48771" source="4183" target="4241" cy:directed="1"/>
      <edge id="5423" label="P19783 (pp) Q9DCJ5" source="4183" target="4318" cy:directed="1"/>
      <edge id="5422" label="P19783 (pp) P00405" source="4183" target="4607" cy:directed="1"/>
      <edge id="5421" label="P19783 (pp) P43024" source="4183" target="4410" cy:directed="1"/>
      <edge id="5420" label="P19783 (pp) P56391" source="4183" target="4269" cy:directed="1"/>
      <edge id="5419" label="P19783 (pp) Q9CQQ7" source="4183" target="4347" cy:directed="1"/>
      <edge id="5418" label="P19783 (pp) Q99LX0" source="4183" target="4255" cy:directed="1"/>
      <edge id="5417" label="P19783 (pp) Q9DCX2" source="4183" target="4304" cy:directed="1"/>
      <edge id="5416" label="P19783 (pp) P17665" source="4183" target="4493" cy:directed="1"/>
      <edge id="5415" label="P19783 (pp) Q9ERS2" source="4183" target="4277" cy:directed="1"/>
      <edge id="5414" label="P19783 (pp) Q91VR2" source="4183" target="4201" cy:directed="1"/>
      <edge id="5413" label="P19783 (pp) Q06185" source="4183" target="4209" cy:directed="1"/>
      <edge id="5412" label="P19783 (pp) Q91YT0" source="4183" target="4317" cy:directed="1"/>
      <edge id="5411" label="P19783 (pp) Q9D3D9" source="4183" target="4148" cy:directed="1"/>
      <edge id="5410" label="P19783 (pp) P19536" source="4183" target="4311" cy:directed="1"/>
      <edge id="5409" label="P19783 (pp) Q9CR68" source="4183" target="4205" cy:directed="1"/>
      <edge id="5408" label="P19783 (pp) Q9CQ69" source="4183" target="4172" cy:directed="1"/>
      <edge id="5407" label="P19783 (pp) Q9CQH3" source="4183" target="4178" cy:directed="1"/>
      <edge id="5406" label="O88952 (pp) O70589" source="4182" target="4502" cy:directed="1"/>
      <edge id="5405" label="O88952 (pp) P60469" source="4182" target="4551" cy:directed="1"/>
      <edge id="5404" label="Q6P9K8 (pp) O70589" source="4181" target="4502" cy:directed="1"/>
      <edge id="5403" label="Q6P9K8 (pp) O88952" source="4181" target="4182" cy:directed="1"/>
      <edge id="5402" label="Q9Z2H5 (pp) Q99N28" source="4180" target="4310" cy:directed="1"/>
      <edge id="5401" label="Q3UHD9 (pp) Q9Z2H5" source="4179" target="4180" cy:directed="1"/>
      <edge id="5400" label="Q9CQH3 (pp) Q9D6J6" source="4178" target="4145" cy:directed="1"/>
      <edge id="5399" label="Q9DB20 (pp) Q9DB77" source="4177" target="4343" cy:directed="1"/>
      <edge id="5398" label="Q9DB20 (pp) Q91VR2" source="4177" target="4201" cy:directed="1"/>
      <edge id="5397" label="Q9DB20 (pp) Q9CPQ8" source="4177" target="4202" cy:directed="1"/>
      <edge id="5396" label="Q9DB20 (pp) Q9Z1P6" source="4177" target="4237" cy:directed="1"/>
      <edge id="5395" label="Q9DB20 (pp) Q03265" source="4177" target="4150" cy:directed="1"/>
      <edge id="5394" label="Q9DB20 (pp) P56480" source="4177" target="4196" cy:directed="1"/>
      <edge id="5393" label="Q9DB20 (pp) P43024" source="4177" target="4410" cy:directed="1"/>
      <edge id="5392" label="Q9DB20 (pp) Q9DCS9" source="4177" target="4204" cy:directed="1"/>
      <edge id="5391" label="Q9DB20 (pp) Q91VM9" source="4177" target="4344" cy:directed="1"/>
      <edge id="5390" label="Q9DB20 (pp) Q06185" source="4177" target="4209" cy:directed="1"/>
      <edge id="5389" label="Q9DB20 (pp) Q8K3J1" source="4177" target="4342" cy:directed="1"/>
      <edge id="5388" label="Q9DB20 (pp) Q78IK2" source="4177" target="4693" cy:directed="1"/>
      <edge id="5387" label="Q9DB20 (pp) P17751" source="4177" target="4235" cy:directed="1"/>
      <edge id="5386" label="Q9DB20 (pp) Q9WUM5" source="4177" target="4214" cy:directed="1"/>
      <edge id="5385" label="Q9DB20 (pp) Q91YT0" source="4177" target="4317" cy:directed="1"/>
      <edge id="5384" label="Q9DB20 (pp) Q9D3D9" source="4177" target="4148" cy:directed="1"/>
      <edge id="5383" label="Q9DB20 (pp) Q9ERS2" source="4177" target="4277" cy:directed="1"/>
      <edge id="5382" label="Q9DB20 (pp) P62073" source="4177" target="4293" cy:directed="1"/>
      <edge id="5381" label="Q9DB20 (pp) Q9CQQ7" source="4177" target="4347" cy:directed="1"/>
      <edge id="5380" label="Q9DB20 (pp) Q9DC69" source="4177" target="4345" cy:directed="1"/>
      <edge id="5379" label="Q9DB20 (pp) Q3UIU2" source="4177" target="4226" cy:directed="1"/>
      <edge id="5378" label="Q9DB20 (pp) P56391" source="4177" target="4269" cy:directed="1"/>
      <edge id="5377" label="Q9DB20 (pp) P19783" source="4177" target="4183" cy:directed="1"/>
      <edge id="5376" label="Q9DB20 (pp) Q9D6J6" source="4177" target="4145" cy:directed="1"/>
      <edge id="5375" label="Q9DB20 (pp) Q9CZ13" source="4177" target="4187" cy:directed="1"/>
      <edge id="5374" label="Q9DB20 (pp) P97807" source="4177" target="4278" cy:directed="1"/>
      <edge id="5373" label="Q9DB20 (pp) Q9CR68" source="4177" target="4205" cy:directed="1"/>
      <edge id="5372" label="Q9DB20 (pp) Q9CQ69" source="4177" target="4172" cy:directed="1"/>
      <edge id="5371" label="Q9DB20 (pp) P99029" source="4177" target="4294" cy:directed="1"/>
      <edge id="5370" label="Q9DB20 (pp) Q9CPP6" source="4177" target="4219" cy:directed="1"/>
      <edge id="5369" label="Q9DB20 (pp) Q9DCJ5" source="4177" target="4318" cy:directed="1"/>
      <edge id="5368" label="Q9DB20 (pp) Q99LX0" source="4177" target="4255" cy:directed="1"/>
      <edge id="5367" label="Q9DB20 (pp) Q9D6J5" source="4177" target="4425" cy:directed="1"/>
      <edge id="5366" label="Q9DB20 (pp) O09111" source="4177" target="4149" cy:directed="1"/>
      <edge id="5365" label="Q9DB20 (pp) Q9DCX2" source="4177" target="4304" cy:directed="1"/>
      <edge id="5364" label="Q9DB20 (pp) P67778" source="4177" target="4199" cy:directed="1"/>
      <edge id="5363" label="Q9DB20 (pp) Q9CQH3" source="4177" target="4178" cy:directed="1"/>
      <edge id="5362" label="P54071 (pp) P70404" source="4175" target="4232" cy:directed="1"/>
      <edge id="5361" label="P54071 (pp) Q60597" source="4175" target="4449" cy:directed="1"/>
      <edge id="5360" label="P54071 (pp) P06151" source="4175" target="4176" cy:directed="1"/>
      <edge id="5359" label="Q9D6R2 (pp) Q9WUM5" source="4174" target="4214" cy:directed="1"/>
      <edge id="5358" label="Q9D6R2 (pp) Q9D2G2" source="4174" target="4225" cy:directed="1"/>
      <edge id="5357" label="Q9D6R2 (pp) P54071" source="4174" target="4175" cy:directed="1"/>
      <edge id="5356" label="Q9D6R2 (pp) Q60597" source="4174" target="4449" cy:directed="1"/>
      <edge id="5355" label="Q9D6R2 (pp) Q8K3J1" source="4174" target="4342" cy:directed="1"/>
      <edge id="5354" label="Q9D6R2 (pp) Q91VR2" source="4174" target="4201" cy:directed="1"/>
      <edge id="5353" label="Q9D6R2 (pp) Q8BWF0" source="4174" target="4561" cy:directed="1"/>
      <edge id="5352" label="Q9D6R2 (pp) P16054" source="4174" target="4381" cy:directed="1"/>
      <edge id="5351" label="Q9D6R2 (pp) P70404" source="4174" target="4232" cy:directed="1"/>
      <edge id="5350" label="P08249 (pp) Q9DCS9" source="4173" target="4204" cy:directed="1"/>
      <edge id="5349" label="P08249 (pp) Q9CQQ7" source="4173" target="4347" cy:directed="1"/>
      <edge id="5348" label="P08249 (pp) Q9CQH3" source="4173" target="4178" cy:directed="1"/>
      <edge id="5347" label="P08249 (pp) Q03265" source="4173" target="4150" cy:directed="1"/>
      <edge id="5346" label="P08249 (pp) P48962" source="4173" target="4636" cy:directed="1"/>
      <edge id="5345" label="P08249 (pp) P06745" source="4173" target="4402" cy:directed="1"/>
      <edge id="5344" label="P08249 (pp) Q9D0M3" source="4173" target="4188" cy:directed="1"/>
      <edge id="5343" label="P08249 (pp) Q9CZ13" source="4173" target="4187" cy:directed="1"/>
      <edge id="5342" label="P08249 (pp) Q9CQZ5" source="4173" target="4144" cy:directed="1"/>
      <edge id="5341" label="P08249 (pp) P26443" source="4173" target="4272" cy:directed="1"/>
      <edge id="5340" label="P08249 (pp) Q9WUM5" source="4173" target="4214" cy:directed="1"/>
      <edge id="5339" label="P08249 (pp) P97450" source="4173" target="4368" cy:directed="1"/>
      <edge id="5338" label="P08249 (pp) Q9DCJ5" source="4173" target="4318" cy:directed="1"/>
      <edge id="5337" label="P08249 (pp) Q9D2G2" source="4173" target="4225" cy:directed="1"/>
      <edge id="5336" label="P08249 (pp) P52480" source="4173" target="4393" cy:directed="1"/>
      <edge id="5335" label="P08249 (pp) P54071" source="4173" target="4175" cy:directed="1"/>
      <edge id="5334" label="P08249 (pp) Q9DB20" source="4173" target="4177" cy:directed="1"/>
      <edge id="5333" label="P08249 (pp) Q91VD9" source="4173" target="4203" cy:directed="1"/>
      <edge id="5332" label="P08249 (pp) P19783" source="4173" target="4183" cy:directed="1"/>
      <edge id="5331" label="P08249 (pp) Q9Z2I9" source="4173" target="4396" cy:directed="1"/>
      <edge id="5330" label="P08249 (pp) Q91YT0" source="4173" target="4317" cy:directed="1"/>
      <edge id="5329" label="P08249 (pp) Q05920" source="4173" target="4192" cy:directed="1"/>
      <edge id="5328" label="P08249 (pp) Q9DCX2" source="4173" target="4304" cy:directed="1"/>
      <edge id="5327" label="P08249 (pp) Q99LX0" source="4173" target="4255" cy:directed="1"/>
      <edge id="5326" label="P08249 (pp) O09111" source="4173" target="4149" cy:directed="1"/>
      <edge id="5325" label="P08249 (pp) Q99KI0" source="4173" target="4276" cy:directed="1"/>
      <edge id="5324" label="P08249 (pp) Q8VEM8" source="4173" target="4287" cy:directed="1"/>
      <edge id="5323" label="P08249 (pp) Q9CQJ8" source="4173" target="4208" cy:directed="1"/>
      <edge id="5322" label="P08249 (pp) Q8BMF4" source="4173" target="4191" cy:directed="1"/>
      <edge id="5321" label="P08249 (pp) Q8BMF3" source="4173" target="4482" cy:directed="1"/>
      <edge id="5320" label="P08249 (pp) Q8K3J1" source="4173" target="4342" cy:directed="1"/>
      <edge id="5319" label="P08249 (pp) Q9DC69" source="4173" target="4345" cy:directed="1"/>
      <edge id="5318" label="P08249 (pp) P09411" source="4173" target="4236" cy:directed="1"/>
      <edge id="5317" label="P08249 (pp) Q9DB77" source="4173" target="4343" cy:directed="1"/>
      <edge id="5316" label="P08249 (pp) Q9CR68" source="4173" target="4205" cy:directed="1"/>
      <edge id="5315" label="P08249 (pp) Q9CQC7" source="4173" target="4432" cy:directed="1"/>
      <edge id="5314" label="P08249 (pp) Q9D6J6" source="4173" target="4145" cy:directed="1"/>
      <edge id="5313" label="P08249 (pp) P63038" source="4173" target="4185" cy:directed="1"/>
      <edge id="5312" label="P08249 (pp) Q8BH04" source="4173" target="4562" cy:directed="1"/>
      <edge id="5311" label="P08249 (pp) Q9DC70" source="4173" target="4210" cy:directed="1"/>
      <edge id="5310" label="P08249 (pp) P05202" source="4173" target="4154" cy:directed="1"/>
      <edge id="5309" label="P08249 (pp) Q8K2B3" source="4173" target="4285" cy:directed="1"/>
      <edge id="5308" label="P08249 (pp) Q9D855" source="4173" target="4341" cy:directed="1"/>
      <edge id="5307" label="P08249 (pp) Q9D051" source="4173" target="4147" cy:directed="1"/>
      <edge id="5306" label="P08249 (pp) Q8BGH2" source="4173" target="4254" cy:directed="1"/>
      <edge id="5305" label="P08249 (pp) Q60931" source="4173" target="4494" cy:directed="1"/>
      <edge id="5304" label="P08249 (pp) Q64521" source="4173" target="4363" cy:directed="1"/>
      <edge id="5303" label="P08249 (pp) P97807" source="4173" target="4278" cy:directed="1"/>
      <edge id="5302" label="P08249 (pp) Q9D3D9" source="4173" target="4148" cy:directed="1"/>
      <edge id="5301" label="P08249 (pp) P56480" source="4173" target="4196" cy:directed="1"/>
      <edge id="5300" label="P08249 (pp) Q9DCD0" source="4173" target="4160" cy:directed="1"/>
      <edge id="5299" label="P08249 (pp) P17751" source="4173" target="4235" cy:directed="1"/>
      <edge id="5298" label="P08249 (pp) O35658" source="4173" target="4302" cy:directed="1"/>
      <edge id="5297" label="P08249 (pp) P70404" source="4173" target="4232" cy:directed="1"/>
      <edge id="5296" label="P08249 (pp) Q91VR2" source="4173" target="4201" cy:directed="1"/>
      <edge id="5295" label="P08249 (pp) Q06185" source="4173" target="4209" cy:directed="1"/>
      <edge id="5294" label="P08249 (pp) Q9D6R2" source="4173" target="4174" cy:directed="1"/>
      <edge id="5293" label="Q9CQ69 (pp) Q99LX0" source="4172" target="4255" cy:directed="1"/>
      <edge id="5292" label="Q9CQ69 (pp) Q9CQQ7" source="4172" target="4347" cy:directed="1"/>
      <edge id="5291" label="Q9CQ69 (pp) O09111" source="4172" target="4149" cy:directed="1"/>
      <edge id="5290" label="Q9CQ69 (pp) P17665" source="4172" target="4493" cy:directed="1"/>
      <edge id="5289" label="Q9CQ69 (pp) Q3UIU2" source="4172" target="4226" cy:directed="1"/>
      <edge id="5288" label="Q9CQ69 (pp) Q91VR2" source="4172" target="4201" cy:directed="1"/>
      <edge id="5287" label="Q9CQ69 (pp) P00405" source="4172" target="4607" cy:directed="1"/>
      <edge id="5286" label="Q9CQ69 (pp) Q9D3D9" source="4172" target="4148" cy:directed="1"/>
      <edge id="5285" label="Q9CQ69 (pp) Q9ERS2" source="4172" target="4277" cy:directed="1"/>
      <edge id="5284" label="Q9CQ69 (pp) Q9DC69" source="4172" target="4345" cy:directed="1"/>
      <edge id="5283" label="Q9CQ69 (pp) Q9CQH3" source="4172" target="4178" cy:directed="1"/>
      <edge id="5282" label="Q9CQ69 (pp) Q9DCJ5" source="4172" target="4318" cy:directed="1"/>
      <edge id="5281" label="Q9CQ69 (pp) Q9D6J6" source="4172" target="4145" cy:directed="1"/>
      <edge id="5280" label="Q9CQ69 (pp) Q99LY9" source="4172" target="4190" cy:directed="1"/>
      <edge id="5279" label="Q9CQ69 (pp) Q8K3J1" source="4172" target="4342" cy:directed="1"/>
      <edge id="5278" label="Q9CQ69 (pp) P56391" source="4172" target="4269" cy:directed="1"/>
      <edge id="5277" label="Q9DCT2 (pp) P97450" source="4171" target="4368" cy:directed="1"/>
      <edge id="5276" label="Q9DCT2 (pp) Q99LX0" source="4171" target="4255" cy:directed="1"/>
      <edge id="5275" label="Q9DCT2 (pp) Q06185" source="4171" target="4209" cy:directed="1"/>
      <edge id="5274" label="Q9DCT2 (pp) P70404" source="4171" target="4232" cy:directed="1"/>
      <edge id="5273" label="Q9DCT2 (pp) Q9CQZ5" source="4171" target="4144" cy:directed="1"/>
      <edge id="5272" label="Q9DCT2 (pp) Q80Y14" source="4171" target="4540" cy:directed="1"/>
      <edge id="5271" label="Q9DCT2 (pp) Q9CZU6" source="4171" target="4159" cy:directed="1"/>
      <edge id="5270" label="Q9DCT2 (pp) Q9CR62" source="4171" target="4684" cy:directed="1"/>
      <edge id="5269" label="Q9DCT2 (pp) Q9Z1P6" source="4171" target="4237" cy:directed="1"/>
      <edge id="5268" label="Q9DCT2 (pp) P97807" source="4171" target="4278" cy:directed="1"/>
      <edge id="5267" label="Q9DCT2 (pp) P50516" source="4171" target="4231" cy:directed="1"/>
      <edge id="5266" label="Q9DCT2 (pp) Q9D0S9" source="4171" target="4211" cy:directed="1"/>
      <edge id="5265" label="Q9DCT2 (pp) Q9CPQ1" source="4171" target="4542" cy:directed="1"/>
      <edge id="5264" label="Q9DCT2 (pp) P08249" source="4171" target="4173" cy:directed="1"/>
      <edge id="5263" label="Q9DCT2 (pp) P62073" source="4171" target="4293" cy:directed="1"/>
      <edge id="5262" label="Q9DCT2 (pp) P68510" source="4171" target="4151" cy:directed="1"/>
      <edge id="5261" label="Q9DCT2 (pp) O09111" source="4171" target="4149" cy:directed="1"/>
      <edge id="5260" label="Q9DCT2 (pp) Q62425" source="4171" target="4483" cy:directed="1"/>
      <edge id="5259" label="Q9DCT2 (pp) Q9CQH3" source="4171" target="4178" cy:directed="1"/>
      <edge id="5258" label="Q9DCT2 (pp) O88441" source="4171" target="4233" cy:directed="1"/>
      <edge id="5257" label="Q9DCT2 (pp) Q91VR2" source="4171" target="4201" cy:directed="1"/>
      <edge id="5256" label="Q9DCT2 (pp) Q99KI0" source="4171" target="4276" cy:directed="1"/>
      <edge id="5255" label="Q9DCT2 (pp) Q9D0M3" source="4171" target="4188" cy:directed="1"/>
      <edge id="5254" label="Q9DCT2 (pp) Q9CQ54" source="4171" target="4170" cy:directed="1"/>
      <edge id="5253" label="Q9DCT2 (pp) Q9CPP6" source="4171" target="4219" cy:directed="1"/>
      <edge id="5252" label="Q9DCT2 (pp) Q8VEM8" source="4171" target="4287" cy:directed="1"/>
      <edge id="5251" label="Q9DCT2 (pp) Q9DB20" source="4171" target="4177" cy:directed="1"/>
      <edge id="5250" label="Q9DCT2 (pp) Q9CZ13" source="4171" target="4187" cy:directed="1"/>
      <edge id="5249" label="Q9DCT2 (pp) P56379" source="4171" target="4353" cy:directed="1"/>
      <edge id="5248" label="Q9DCT2 (pp) Q91YT0" source="4171" target="4317" cy:directed="1"/>
      <edge id="5247" label="Q9DCT2 (pp) Q8BH95" source="4171" target="4186" cy:directed="1"/>
      <edge id="5246" label="Q9DCT2 (pp) Q91VD9" source="4171" target="4203" cy:directed="1"/>
      <edge id="5245" label="Q9DCT2 (pp) P52503" source="4171" target="4290" cy:directed="1"/>
      <edge id="5244" label="Q9DCT2 (pp) Q9CQ75" source="4171" target="4327" cy:directed="1"/>
      <edge id="5243" label="Q9DCT2 (pp) Q8K2B3" source="4171" target="4285" cy:directed="1"/>
      <edge id="5242" label="Q9DCT2 (pp) P56480" source="4171" target="4196" cy:directed="1"/>
      <edge id="5241" label="Q9DCT2 (pp) P09671" source="4171" target="4382" cy:directed="1"/>
      <edge id="5240" label="Q9DCT2 (pp) Q9DCJ5" source="4171" target="4318" cy:directed="1"/>
      <edge id="5239" label="Q9DCT2 (pp) Q9CQR4" source="4171" target="4296" cy:directed="1"/>
      <edge id="5238" label="Q9DCT2 (pp) Q9DCX2" source="4171" target="4304" cy:directed="1"/>
      <edge id="5237" label="Q9DCT2 (pp) Q9D855" source="4171" target="4341" cy:directed="1"/>
      <edge id="5236" label="Q9DCT2 (pp) Q9DC69" source="4171" target="4345" cy:directed="1"/>
      <edge id="5235" label="Q9DCT2 (pp) Q9D051" source="4171" target="4147" cy:directed="1"/>
      <edge id="5234" label="Q9DCT2 (pp) P99029" source="4171" target="4294" cy:directed="1"/>
      <edge id="5233" label="Q9DCT2 (pp) Q9CQZ6" source="4171" target="4169" cy:directed="1"/>
      <edge id="5232" label="Q9DCT2 (pp) P42125" source="4171" target="4457" cy:directed="1"/>
      <edge id="5231" label="Q9DCT2 (pp) Q9CR68" source="4171" target="4205" cy:directed="1"/>
      <edge id="5230" label="Q9DCT2 (pp) Q7TMF3" source="4171" target="4303" cy:directed="1"/>
      <edge id="5229" label="Q9DCT2 (pp) Q99LY9" source="4171" target="4190" cy:directed="1"/>
      <edge id="5228" label="Q9DCT2 (pp) Q99LC5" source="4171" target="4253" cy:directed="1"/>
      <edge id="5227" label="Q9DCT2 (pp) Q9CXZ1" source="4171" target="4334" cy:directed="1"/>
      <edge id="5226" label="Q9DCT2 (pp) Q9CQJ8" source="4171" target="4208" cy:directed="1"/>
      <edge id="5225" label="Q9DCT2 (pp) Q9WUM5" source="4171" target="4214" cy:directed="1"/>
      <edge id="5224" label="Q9DCT2 (pp) Q9CQC7" source="4171" target="4432" cy:directed="1"/>
      <edge id="5223" label="Q9DCT2 (pp) Q8BGH2" source="4171" target="4254" cy:directed="1"/>
      <edge id="5222" label="Q9DCT2 (pp) Q03265" source="4171" target="4150" cy:directed="1"/>
      <edge id="5221" label="Q9DCT2 (pp) Q9ERS2" source="4171" target="4277" cy:directed="1"/>
      <edge id="5220" label="Q9DCT2 (pp) P56391" source="4171" target="4269" cy:directed="1"/>
      <edge id="5219" label="Q9DCT2 (pp) Q9D6J5" source="4171" target="4425" cy:directed="1"/>
      <edge id="5218" label="Q9DCT2 (pp) Q91WD5" source="4171" target="4284" cy:directed="1"/>
      <edge id="5217" label="Q9DCT2 (pp) Q8K3J1" source="4171" target="4342" cy:directed="1"/>
      <edge id="5216" label="Q9DCT2 (pp) P17751" source="4171" target="4235" cy:directed="1"/>
      <edge id="5215" label="Q9DCT2 (pp) P48771" source="4171" target="4241" cy:directed="1"/>
      <edge id="5214" label="Q9DCT2 (pp) Q9D3D9" source="4171" target="4148" cy:directed="1"/>
      <edge id="5213" label="Q9DCT2 (pp) Q9DCS9" source="4171" target="4204" cy:directed="1"/>
      <edge id="5212" label="Q9DCT2 (pp) Q9D6J6" source="4171" target="4145" cy:directed="1"/>
      <edge id="5211" label="Q9DCT2 (pp) Q9CQQ7" source="4171" target="4347" cy:directed="1"/>
      <edge id="5210" label="Q9DCT2 (pp) Q9DB77" source="4171" target="4343" cy:directed="1"/>
      <edge id="5209" label="Q9DCT2 (pp) Q3UIU2" source="4171" target="4226" cy:directed="1"/>
      <edge id="5208" label="Q9DCT2 (pp) Q9DC70" source="4171" target="4210" cy:directed="1"/>
      <edge id="5207" label="Q9DCT2 (pp) P19536" source="4171" target="4311" cy:directed="1"/>
      <edge id="5206" label="Q9DCT2 (pp) Q8K1Z0" source="4171" target="4257" cy:directed="1"/>
      <edge id="5205" label="Q9DCT2 (pp) Q9CQA3" source="4171" target="4250" cy:directed="1"/>
      <edge id="5204" label="Q9DCT2 (pp) O70325" source="4171" target="4240" cy:directed="1"/>
      <edge id="5203" label="Q9DCT2 (pp) Q99LC3" source="4171" target="4189" cy:directed="1"/>
      <edge id="5202" label="Q9DCT2 (pp) P19783" source="4171" target="4183" cy:directed="1"/>
      <edge id="5201" label="Q9DCT2 (pp) Q9CQ69" source="4171" target="4172" cy:directed="1"/>
      <edge id="5200" label="Q9CQ54 (pp) Q3UIU2" source="4170" target="4226" cy:directed="1"/>
      <edge id="5199" label="Q9CQ54 (pp) Q9Z1P6" source="4170" target="4237" cy:directed="1"/>
      <edge id="5198" label="Q9CQ54 (pp) Q9CQH3" source="4170" target="4178" cy:directed="1"/>
      <edge id="5197" label="Q9CQ54 (pp) Q99LY9" source="4170" target="4190" cy:directed="1"/>
      <edge id="5196" label="Q9CQ54 (pp) Q9DCS9" source="4170" target="4204" cy:directed="1"/>
      <edge id="5195" label="Q9CQ54 (pp) Q9D6J6" source="4170" target="4145" cy:directed="1"/>
      <edge id="5194" label="Q9CQ54 (pp) Q9CQ69" source="4170" target="4172" cy:directed="1"/>
      <edge id="5193" label="Q9CQ54 (pp) Q8K3J1" source="4170" target="4342" cy:directed="1"/>
      <edge id="5192" label="Q9CQ54 (pp) Q06185" source="4170" target="4209" cy:directed="1"/>
      <edge id="5191" label="Q9CQ54 (pp) Q9DCJ5" source="4170" target="4318" cy:directed="1"/>
      <edge id="5190" label="Q9CQ54 (pp) Q9CQQ7" source="4170" target="4347" cy:directed="1"/>
      <edge id="5189" label="Q9CQ54 (pp) Q9DC69" source="4170" target="4345" cy:directed="1"/>
      <edge id="5188" label="Q9CQ54 (pp) O09111" source="4170" target="4149" cy:directed="1"/>
      <edge id="5187" label="Q9CQ54 (pp) Q91YT0" source="4170" target="4317" cy:directed="1"/>
      <edge id="5186" label="Q9CQZ6 (pp) Q9CQ69" source="4169" target="4172" cy:directed="1"/>
      <edge id="5185" label="Q9CQZ6 (pp) Q99LX0" source="4169" target="4255" cy:directed="1"/>
      <edge id="5184" label="Q9CQZ6 (pp) Q9CQQ7" source="4169" target="4347" cy:directed="1"/>
      <edge id="5183" label="Q9CQZ6 (pp) P48771" source="4169" target="4241" cy:directed="1"/>
      <edge id="5182" label="Q9CQZ6 (pp) Q9DCJ5" source="4169" target="4318" cy:directed="1"/>
      <edge id="5181" label="Q9CQZ6 (pp) Q99LC5" source="4169" target="4253" cy:directed="1"/>
      <edge id="5180" label="Q9CQZ6 (pp) Q9CPQ8" source="4169" target="4202" cy:directed="1"/>
      <edge id="5179" label="Q9CQZ6 (pp) Q9Z1P6" source="4169" target="4237" cy:directed="1"/>
      <edge id="5178" label="Q9CQZ6 (pp) Q9DC69" source="4169" target="4345" cy:directed="1"/>
      <edge id="5177" label="Q9CQZ6 (pp) P56391" source="4169" target="4269" cy:directed="1"/>
      <edge id="5176" label="Q9CQZ6 (pp) Q9DB77" source="4169" target="4343" cy:directed="1"/>
      <edge id="5175" label="Q9CQZ6 (pp) Q9DCX2" source="4169" target="4304" cy:directed="1"/>
      <edge id="5174" label="Q9CQZ6 (pp) Q99LY9" source="4169" target="4190" cy:directed="1"/>
      <edge id="5173" label="Q9CQZ6 (pp) Q91VR2" source="4169" target="4201" cy:directed="1"/>
      <edge id="5172" label="Q9CQZ6 (pp) Q91YT0" source="4169" target="4317" cy:directed="1"/>
      <edge id="5171" label="Q9CQZ6 (pp) Q8K3J1" source="4169" target="4342" cy:directed="1"/>
      <edge id="5170" label="Q9CQZ6 (pp) Q9ERS2" source="4169" target="4277" cy:directed="1"/>
      <edge id="5169" label="Q9CQZ6 (pp) Q62425" source="4169" target="4483" cy:directed="1"/>
      <edge id="5168" label="Q9CQZ6 (pp) Q9WUM5" source="4169" target="4214" cy:directed="1"/>
      <edge id="5167" label="Q9CQZ6 (pp) Q9D6J6" source="4169" target="4145" cy:directed="1"/>
      <edge id="5166" label="Q9CQZ6 (pp) Q06185" source="4169" target="4209" cy:directed="1"/>
      <edge id="5165" label="Q9CQZ6 (pp) Q9DCS9" source="4169" target="4204" cy:directed="1"/>
      <edge id="5164" label="Q9CQZ6 (pp) Q9CR68" source="4169" target="4205" cy:directed="1"/>
      <edge id="5163" label="Q9CQZ6 (pp) Q9CQH3" source="4169" target="4178" cy:directed="1"/>
      <edge id="5162" label="Q9CQZ6 (pp) Q3UIU2" source="4169" target="4226" cy:directed="1"/>
      <edge id="5161" label="Q9CQZ6 (pp) Q99LC3" source="4169" target="4189" cy:directed="1"/>
      <edge id="5160" label="Q9CQZ6 (pp) Q9CQ54" source="4169" target="4170" cy:directed="1"/>
      <edge id="5159" label="Q76MZ3 (pp) Q9DC28" source="4168" target="4590" cy:directed="1"/>
      <edge id="5158" label="Q76MZ3 (pp) Q61151" source="4168" target="4691" cy:directed="1"/>
      <edge id="5157" label="Q76MZ3 (pp) P18052" source="4168" target="4352" cy:directed="1"/>
      <edge id="5156" label="Q76MZ3 (pp) P61982" source="4168" target="4447" cy:directed="1"/>
      <edge id="5155" label="Q76MZ3 (pp) P62259" source="4168" target="4163" cy:directed="1"/>
      <edge id="5154" label="Q76MZ3 (pp) P50396" source="4168" target="4585" cy:directed="1"/>
      <edge id="5153" label="Q76MZ3 (pp) Q60996" source="4168" target="4524" cy:directed="1"/>
      <edge id="5152" label="Q76MZ3 (pp) Q99KJ8" source="4168" target="4274" cy:directed="1"/>
      <edge id="5151" label="Q76MZ3 (pp) P35438" source="4168" target="4153" cy:directed="1"/>
      <edge id="5150" label="Q76MZ3 (pp) P63101" source="4168" target="4417" cy:directed="1"/>
      <edge id="5149" label="Q76MZ3 (pp) O08788" source="4168" target="4275" cy:directed="1"/>
      <edge id="5148" label="Q76MZ3 (pp) Q6P1F6" source="4168" target="4567" cy:directed="1"/>
      <edge id="5147" label="P63330 (pp) Q6P1F6" source="4167" target="4567" cy:directed="1"/>
      <edge id="5146" label="P63330 (pp) P35438" source="4167" target="4153" cy:directed="1"/>
      <edge id="5145" label="P63330 (pp) Q61151" source="4167" target="4691" cy:directed="1"/>
      <edge id="5144" label="P63330 (pp) Q60996" source="4167" target="4524" cy:directed="1"/>
      <edge id="5143" label="P63330 (pp) Q76MZ3" source="4167" target="4168" cy:directed="1"/>
      <edge id="5142" label="P16546 (pp) O08788" source="4166" target="4275" cy:directed="1"/>
      <edge id="5141" label="P16546 (pp) Q9CQV8" source="4166" target="4295" cy:directed="1"/>
      <edge id="5140" label="Q8C8R3 (pp) P11627" source="4165" target="4499" cy:directed="1"/>
      <edge id="5139" label="Q8C8R3 (pp) P16546" source="4165" target="4166" cy:directed="1"/>
      <edge id="5138" label="P47757 (pp) O89053" source="4164" target="4732" cy:directed="1"/>
      <edge id="5137" label="P62259 (pp) Q812A2" source="4163" target="4738" cy:directed="1"/>
      <edge id="5136" label="P62259 (pp) Q3UTJ2" source="4163" target="4403" cy:directed="1"/>
      <edge id="5135" label="P62259 (pp) Q68FF6" source="4163" target="4521" cy:directed="1"/>
      <edge id="5134" label="P62259 (pp) Q61316" source="4163" target="4679" cy:directed="1"/>
      <edge id="5133" label="P62259 (pp) P30999" source="4163" target="4522" cy:directed="1"/>
      <edge id="5132" label="P62259 (pp) Q03265" source="4163" target="4150" cy:directed="1"/>
      <edge id="5131" label="P62259 (pp) Q9DC28" source="4163" target="4590" cy:directed="1"/>
      <edge id="5130" label="P62259 (pp) P16858" source="4163" target="4497" cy:directed="1"/>
      <edge id="5129" label="P62259 (pp) Q9QWI6" source="4163" target="4418" cy:directed="1"/>
      <edge id="5128" label="P62259 (pp) P63101" source="4163" target="4417" cy:directed="1"/>
      <edge id="5127" label="P62259 (pp) P10637" source="4163" target="4472" cy:directed="1"/>
      <edge id="5126" label="P62259 (pp) O88935" source="4163" target="4369" cy:directed="1"/>
      <edge id="5125" label="P62259 (pp) Q9JLM8" source="4163" target="4366" cy:directed="1"/>
      <edge id="5124" label="P62259 (pp) P46660" source="4163" target="4339" cy:directed="1"/>
      <edge id="5123" label="P62259 (pp) P47757" source="4163" target="4164" cy:directed="1"/>
      <edge id="5122" label="Q9Z1G3 (pp) P23506" source="4162" target="4424" cy:directed="1"/>
      <edge id="5121" label="Q9Z1G3 (pp) P63082" source="4162" target="4386" cy:directed="1"/>
      <edge id="5120" label="Q9Z1G3 (pp) Q8BVE3" source="4162" target="4308" cy:directed="1"/>
      <edge id="5119" label="Q9Z1G3 (pp) Q91VM9" source="4162" target="4344" cy:directed="1"/>
      <edge id="5118" label="Q9Z1G3 (pp) P50516" source="4162" target="4231" cy:directed="1"/>
      <edge id="5117" label="Q9Z1G3 (pp) Q9Z1G4" source="4162" target="4213" cy:directed="1"/>
      <edge id="5116" label="Q9Z1G3 (pp) Q9WTT4" source="4162" target="4427" cy:directed="1"/>
      <edge id="5115" label="Q9Z1G3 (pp) P62331" source="4162" target="4256" cy:directed="1"/>
      <edge id="5114" label="P51863 (pp) Q9WTT4" source="4161" target="4427" cy:directed="1"/>
      <edge id="5113" label="P51863 (pp) P50518" source="4161" target="4307" cy:directed="1"/>
      <edge id="5112" label="P51863 (pp) Q9EPJ9" source="4161" target="4608" cy:directed="1"/>
      <edge id="5111" label="P51863 (pp) Q9Z1G4" source="4161" target="4213" cy:directed="1"/>
      <edge id="5110" label="P51863 (pp) P57746" source="4161" target="4230" cy:directed="1"/>
      <edge id="5109" label="P51863 (pp) P50516" source="4161" target="4231" cy:directed="1"/>
      <edge id="5108" label="P51863 (pp) Q8BVE3" source="4161" target="4308" cy:directed="1"/>
      <edge id="5107" label="P51863 (pp) P63082" source="4161" target="4386" cy:directed="1"/>
      <edge id="5106" label="P51863 (pp) Q9Z1G3" source="4161" target="4162" cy:directed="1"/>
      <edge id="5105" label="Q9DCD0 (pp) Q8CAQ8" source="4160" target="4491" cy:directed="1"/>
      <edge id="5104" label="Q9DCD0 (pp) P06151" source="4160" target="4176" cy:directed="1"/>
      <edge id="5103" label="Q9DCD0 (pp) Q91ZJ5" source="4160" target="4552" cy:directed="1"/>
      <edge id="5102" label="Q9DCD0 (pp) Q8BMS1" source="4160" target="4454" cy:directed="1"/>
      <edge id="5101" label="Q9DCD0 (pp) Q9D0F9" source="4160" target="4573" cy:directed="1"/>
      <edge id="5100" label="Q9CZU6 (pp) P19096" source="4159" target="4624" cy:directed="1"/>
      <edge id="5099" label="Q9CZU6 (pp) Q9CR68" source="4159" target="4205" cy:directed="1"/>
      <edge id="5098" label="Q9CZU6 (pp) Q9CZ13" source="4159" target="4187" cy:directed="1"/>
      <edge id="5097" label="Q9CZU6 (pp) Q9D6J6" source="4159" target="4145" cy:directed="1"/>
      <edge id="5096" label="Q9CZU6 (pp) Q05920" source="4159" target="4192" cy:directed="1"/>
      <edge id="5095" label="Q9CZU6 (pp) Q9D2G2" source="4159" target="4225" cy:directed="1"/>
      <edge id="5094" label="Q9CZU6 (pp) P56480" source="4159" target="4196" cy:directed="1"/>
      <edge id="5093" label="Q9CZU6 (pp) Q8QZT1" source="4159" target="4495" cy:directed="1"/>
      <edge id="5092" label="Q9CZU6 (pp) Q9WUM5" source="4159" target="4214" cy:directed="1"/>
      <edge id="5091" label="Q9CZU6 (pp) P70404" source="4159" target="4232" cy:directed="1"/>
      <edge id="5090" label="Q9CZU6 (pp) Q9D6R2" source="4159" target="4174" cy:directed="1"/>
      <edge id="5089" label="Q9CZU6 (pp) Q9DB20" source="4159" target="4177" cy:directed="1"/>
      <edge id="5088" label="Q9CZU6 (pp) Q60597" source="4159" target="4449" cy:directed="1"/>
      <edge id="5087" label="Q9CZU6 (pp) Q8BGH2" source="4159" target="4254" cy:directed="1"/>
      <edge id="5086" label="Q9CZU6 (pp) P35486" source="4159" target="4377" cy:directed="1"/>
      <edge id="5085" label="Q9CZU6 (pp) Q8BH04" source="4159" target="4562" cy:directed="1"/>
      <edge id="5084" label="Q9CZU6 (pp) Q8BMF4" source="4159" target="4191" cy:directed="1"/>
      <edge id="5083" label="Q9CZU6 (pp) Q99JY0" source="4159" target="4322" cy:directed="1"/>
      <edge id="5082" label="Q9CZU6 (pp) Q9CQA3" source="4159" target="4250" cy:directed="1"/>
      <edge id="5081" label="Q9CZU6 (pp) Q9D0M3" source="4159" target="4188" cy:directed="1"/>
      <edge id="5080" label="Q9CZU6 (pp) P09671" source="4159" target="4382" cy:directed="1"/>
      <edge id="5079" label="Q9CZU6 (pp) P52480" source="4159" target="4393" cy:directed="1"/>
      <edge id="5078" label="Q9CZU6 (pp) Q03265" source="4159" target="4150" cy:directed="1"/>
      <edge id="5077" label="Q9CZU6 (pp) Q91YT0" source="4159" target="4317" cy:directed="1"/>
      <edge id="5076" label="Q9CZU6 (pp) Q91WD5" source="4159" target="4284" cy:directed="1"/>
      <edge id="5075" label="Q9CZU6 (pp) Q8BWT1" source="4159" target="4249" cy:directed="1"/>
      <edge id="5074" label="Q9CZU6 (pp) Q99KI0" source="4159" target="4276" cy:directed="1"/>
      <edge id="5073" label="Q9CZU6 (pp) Q8K2B3" source="4159" target="4285" cy:directed="1"/>
      <edge id="5072" label="Q9CZU6 (pp) P06151" source="4159" target="4176" cy:directed="1"/>
      <edge id="5071" label="Q9CZU6 (pp) P97807" source="4159" target="4278" cy:directed="1"/>
      <edge id="5070" label="Q9CZU6 (pp) Q91VR2" source="4159" target="4201" cy:directed="1"/>
      <edge id="5069" label="Q9CZU6 (pp) P08249" source="4159" target="4173" cy:directed="1"/>
      <edge id="5068" label="Q9CZU6 (pp) P26443" source="4159" target="4272" cy:directed="1"/>
      <edge id="5067" label="Q9CZU6 (pp) Q8BMF3" source="4159" target="4482" cy:directed="1"/>
      <edge id="5066" label="Q9CZU6 (pp) Q8BKZ9" source="4159" target="4451" cy:directed="1"/>
      <edge id="5065" label="Q9CZU6 (pp) P05202" source="4159" target="4154" cy:directed="1"/>
      <edge id="5064" label="Q9CZU6 (pp) Q91VD9" source="4159" target="4203" cy:directed="1"/>
      <edge id="5063" label="Q9CZU6 (pp) Q9DCD0" source="4159" target="4160" cy:directed="1"/>
      <edge id="5062" label="P35436 (pp) P35438" source="4158" target="4153" cy:directed="1"/>
      <edge id="5061" label="P23819 (pp) P16330" source="4157" target="4503" cy:directed="1"/>
      <edge id="5060" label="P23819 (pp) P38647" source="4157" target="4484" cy:directed="1"/>
      <edge id="5059" label="P23819 (pp) O08599" source="4157" target="4612" cy:directed="1"/>
      <edge id="5058" label="P23819 (pp) P99024" source="4157" target="4505" cy:directed="1"/>
      <edge id="5057" label="P23819 (pp) P68369" source="4157" target="4286" cy:directed="1"/>
      <edge id="5056" label="P23819 (pp) P35436" source="4157" target="4158" cy:directed="1"/>
      <edge id="5055" label="Q06335 (pp) Q03157" source="4156" target="4695" cy:directed="1"/>
      <edge id="5054" label="Q06335 (pp) P63001" source="4156" target="4336" cy:directed="1"/>
      <edge id="5053" label="Q06335 (pp) P12023" source="4156" target="4263" cy:directed="1"/>
      <edge id="5052" label="Q06335 (pp) P04925" source="4156" target="4323" cy:directed="1"/>
      <edge id="5051" label="Q06335 (pp) P63330" source="4156" target="4167" cy:directed="1"/>
      <edge id="5050" label="Q06335 (pp) Q9QXJ1" source="4156" target="4508" cy:directed="1"/>
      <edge id="5049" label="Q9QUI0 (pp) O88643" source="4155" target="4664" cy:directed="1"/>
      <edge id="5048" label="Q9QUI0 (pp) P63001" source="4155" target="4336" cy:directed="1"/>
      <edge id="5047" label="Q9QUI0 (pp) P30999" source="4155" target="4522" cy:directed="1"/>
      <edge id="5046" label="Q9QUI0 (pp) Q99PT1" source="4155" target="4371" cy:directed="1"/>
      <edge id="5045" label="Q9QUI0 (pp) Q06335" source="4155" target="4156" cy:directed="1"/>
      <edge id="5044" label="P05202 (pp) P70404" source="4154" target="4232" cy:directed="1"/>
      <edge id="5043" label="P05202 (pp) P06151" source="4154" target="4176" cy:directed="1"/>
      <edge id="5042" label="P05202 (pp) Q8BH04" source="4154" target="4562" cy:directed="1"/>
      <edge id="5041" label="P05202 (pp) Q05920" source="4154" target="4192" cy:directed="1"/>
      <edge id="5040" label="P05202 (pp) Q60597" source="4154" target="4449" cy:directed="1"/>
      <edge id="5039" label="P05202 (pp) Q9D6R2" source="4154" target="4174" cy:directed="1"/>
      <edge id="5038" label="P05202 (pp) P54071" source="4154" target="4175" cy:directed="1"/>
      <edge id="5037" label="P35438 (pp) P11627" source="4153" target="4499" cy:directed="1"/>
      <edge id="5036" label="P35438 (pp) F6SEU4" source="4153" target="4701" cy:directed="1"/>
      <edge id="5035" label="P35438 (pp) O35526" source="4153" target="4267" cy:directed="1"/>
      <edge id="5034" label="P35438 (pp) P12367" source="4153" target="4355" cy:directed="1"/>
      <edge id="5033" label="P35438 (pp) P63017" source="4153" target="4358" cy:directed="1"/>
      <edge id="5032" label="P35438 (pp) A2CG49" source="4153" target="4730" cy:directed="1"/>
      <edge id="5031" label="P35438 (pp) O88737" source="4153" target="4433" cy:directed="1"/>
      <edge id="5030" label="P35438 (pp) Q6URW6" source="4153" target="4725" cy:directed="1"/>
      <edge id="5029" label="P35438 (pp) Q8BMF4" source="4153" target="4191" cy:directed="1"/>
      <edge id="5028" label="P35438 (pp) P57780" source="4153" target="4672" cy:directed="1"/>
      <edge id="5027" label="P35438 (pp) O55100" source="4153" target="4620" cy:directed="1"/>
      <edge id="5026" label="P35438 (pp) P62259" source="4153" target="4163" cy:directed="1"/>
      <edge id="5025" label="P35438 (pp) P68368" source="4153" target="4470" cy:directed="1"/>
      <edge id="5024" label="P35438 (pp) P06837" source="4153" target="4445" cy:directed="1"/>
      <edge id="5023" label="P35438 (pp) P68033" source="4153" target="4509" cy:directed="1"/>
      <edge id="5022" label="P35438 (pp) Q60631" source="4153" target="4291" cy:directed="1"/>
      <edge id="5021" label="P35438 (pp) Q6PIC6" source="4153" target="4571" cy:directed="1"/>
      <edge id="5020" label="P35438 (pp) P28652" source="4153" target="4514" cy:directed="1"/>
      <edge id="5019" label="P12382 (pp) P17751" source="4152" target="4235" cy:directed="1"/>
      <edge id="5018" label="P12382 (pp) P47857" source="4152" target="4469" cy:directed="1"/>
      <edge id="5017" label="P12382 (pp) P52480" source="4152" target="4393" cy:directed="1"/>
      <edge id="5016" label="P12382 (pp) P06745" source="4152" target="4402" cy:directed="1"/>
      <edge id="5015" label="P12382 (pp) P63101" source="4152" target="4417" cy:directed="1"/>
      <edge id="5014" label="P12382 (pp) Q93092" source="4152" target="4392" cy:directed="1"/>
      <edge id="5013" label="P12382 (pp) P05064" source="4152" target="4259" cy:directed="1"/>
      <edge id="5012" label="P12382 (pp) P05063" source="4152" target="4450" cy:directed="1"/>
      <edge id="5011" label="P12382 (pp) P17710" source="4152" target="4260" cy:directed="1"/>
      <edge id="5010" label="P12382 (pp) P35438" source="4152" target="4153" cy:directed="1"/>
      <edge id="5009" label="P68510 (pp) P62259" source="4151" target="4163" cy:directed="1"/>
      <edge id="5008" label="P68510 (pp) Q9DCJ5" source="4151" target="4318" cy:directed="1"/>
      <edge id="5007" label="P68510 (pp) Q9CQW1" source="4151" target="4708" cy:directed="1"/>
      <edge id="5006" label="P68510 (pp) P56480" source="4151" target="4196" cy:directed="1"/>
      <edge id="5005" label="P68510 (pp) Q9D051" source="4151" target="4147" cy:directed="1"/>
      <edge id="5004" label="P68510 (pp) P11499" source="4151" target="4258" cy:directed="1"/>
      <edge id="5003" label="P68510 (pp) Q9WV55" source="4151" target="4661" cy:directed="1"/>
      <edge id="5002" label="P68510 (pp) Q9DCW4" source="4151" target="4218" cy:directed="1"/>
      <edge id="5001" label="P68510 (pp) Q60930" source="4151" target="4615" cy:directed="1"/>
      <edge id="5000" label="P68510 (pp) P46460" source="4151" target="4221" cy:directed="1"/>
      <edge id="4999" label="P68510 (pp) P42208" source="4151" target="4645" cy:directed="1"/>
      <edge id="4998" label="P68510 (pp) Q9ERS2" source="4151" target="4277" cy:directed="1"/>
      <edge id="4997" label="P68510 (pp) P54071" source="4151" target="4175" cy:directed="1"/>
      <edge id="4996" label="P68510 (pp) Q68FD5" source="4151" target="4314" cy:directed="1"/>
      <edge id="4995" label="P68510 (pp) Q9CWS0" source="4151" target="4713" cy:directed="1"/>
      <edge id="4994" label="P68510 (pp) P12787" source="4151" target="4251" cy:directed="1"/>
      <edge id="4993" label="P68510 (pp) P50518" source="4151" target="4307" cy:directed="1"/>
      <edge id="4992" label="P68510 (pp) P48036" source="4151" target="4677" cy:directed="1"/>
      <edge id="4991" label="P68510 (pp) P63101" source="4151" target="4417" cy:directed="1"/>
      <edge id="4990" label="P68510 (pp) Q9R0Q6" source="4151" target="4315" cy:directed="1"/>
      <edge id="4989" label="P68510 (pp) P61164" source="4151" target="4619" cy:directed="1"/>
      <edge id="4988" label="P68510 (pp) P10637" source="4151" target="4472" cy:directed="1"/>
      <edge id="4987" label="P68510 (pp) O55042" source="4151" target="4554" cy:directed="1"/>
      <edge id="4986" label="P68510 (pp) P67871" source="4151" target="4600" cy:directed="1"/>
      <edge id="4985" label="P68510 (pp) Q61553" source="4151" target="4598" cy:directed="1"/>
      <edge id="4984" label="P68510 (pp) P08249" source="4151" target="4173" cy:directed="1"/>
      <edge id="4983" label="P68510 (pp) Q8VBV7" source="4151" target="4591" cy:directed="1"/>
      <edge id="4982" label="P68510 (pp) Q91VZ6" source="4151" target="4576" cy:directed="1"/>
      <edge id="4981" label="P68510 (pp) Q9CQ92" source="4151" target="4387" cy:directed="1"/>
      <edge id="4980" label="P68510 (pp) Q9D8B3" source="4151" target="4556" cy:directed="1"/>
      <edge id="4979" label="P68510 (pp) P68368" source="4151" target="4470" cy:directed="1"/>
      <edge id="4978" label="P68510 (pp) Q99PT1" source="4151" target="4371" cy:directed="1"/>
      <edge id="4977" label="P68510 (pp) P17751" source="4151" target="4235" cy:directed="1"/>
      <edge id="4976" label="P68510 (pp) P05202" source="4151" target="4154" cy:directed="1"/>
      <edge id="4975" label="Q03265 (pp) P43024" source="4150" target="4410" cy:directed="1"/>
      <edge id="4974" label="Q03265 (pp) Q9CQH3" source="4150" target="4178" cy:directed="1"/>
      <edge id="4973" label="Q03265 (pp) Q9D6J6" source="4150" target="4145" cy:directed="1"/>
      <edge id="4972" label="Q03265 (pp) O35143" source="4150" target="4641" cy:directed="1"/>
      <edge id="4971" label="Q03265 (pp) Q9CQQ7" source="4150" target="4347" cy:directed="1"/>
      <edge id="4970" label="Q03265 (pp) P03930" source="4150" target="4326" cy:directed="1"/>
      <edge id="4969" label="Q03265 (pp) P19536" source="4150" target="4311" cy:directed="1"/>
      <edge id="4968" label="Q03265 (pp) P48962" source="4150" target="4636" cy:directed="1"/>
      <edge id="4967" label="Q03265 (pp) Q9D3D9" source="4150" target="4148" cy:directed="1"/>
      <edge id="4966" label="Q03265 (pp) Q9D2G2" source="4150" target="4225" cy:directed="1"/>
      <edge id="4965" label="Q03265 (pp) Q8VEM8" source="4150" target="4287" cy:directed="1"/>
      <edge id="4964" label="Q03265 (pp) Q60931" source="4150" target="4494" cy:directed="1"/>
      <edge id="4963" label="Q03265 (pp) P63038" source="4150" target="4185" cy:directed="1"/>
      <edge id="4962" label="Q03265 (pp) Q9DB77" source="4150" target="4343" cy:directed="1"/>
      <edge id="4961" label="Q03265 (pp) Q06185" source="4150" target="4209" cy:directed="1"/>
      <edge id="4960" label="Q03265 (pp) Q9WUM5" source="4150" target="4214" cy:directed="1"/>
      <edge id="4959" label="Q03265 (pp) Q91YT0" source="4150" target="4317" cy:directed="1"/>
      <edge id="4958" label="Q03265 (pp) Q91VR2" source="4150" target="4201" cy:directed="1"/>
      <edge id="4957" label="Q03265 (pp) Q9R0Y5" source="4150" target="4510" cy:directed="1"/>
      <edge id="4956" label="Q03265 (pp) Q99LC5" source="4150" target="4253" cy:directed="1"/>
      <edge id="4955" label="Q03265 (pp) Q8K3J1" source="4150" target="4342" cy:directed="1"/>
      <edge id="4954" label="Q03265 (pp) P09411" source="4150" target="4236" cy:directed="1"/>
      <edge id="4953" label="Q03265 (pp) P16054" source="4150" target="4381" cy:directed="1"/>
      <edge id="4952" label="Q03265 (pp) P97807" source="4150" target="4278" cy:directed="1"/>
      <edge id="4951" label="Q03265 (pp) Q9CZ13" source="4150" target="4187" cy:directed="1"/>
      <edge id="4950" label="Q03265 (pp) Q91VD9" source="4150" target="4203" cy:directed="1"/>
      <edge id="4949" label="Q03265 (pp) Q9DCX2" source="4150" target="4304" cy:directed="1"/>
      <edge id="4948" label="Q03265 (pp) Q9CR68" source="4150" target="4205" cy:directed="1"/>
      <edge id="4947" label="Q03265 (pp) Q9DC69" source="4150" target="4345" cy:directed="1"/>
      <edge id="4946" label="Q03265 (pp) Q91VM9" source="4150" target="4344" cy:directed="1"/>
      <edge id="4945" label="Q03265 (pp) P68510" source="4150" target="4151" cy:directed="1"/>
      <edge id="4944" label="O09111 (pp) Q9D6J6" source="4149" target="4145" cy:directed="1"/>
      <edge id="4943" label="O09111 (pp) Q9CQH3" source="4149" target="4178" cy:directed="1"/>
      <edge id="4942" label="Q9D3D9 (pp) Q9D6J6" source="4148" target="4145" cy:directed="1"/>
      <edge id="4941" label="Q9D3D9 (pp) Q99LY9" source="4148" target="4190" cy:directed="1"/>
      <edge id="4940" label="Q9D3D9 (pp) Q91VR2" source="4148" target="4201" cy:directed="1"/>
      <edge id="4939" label="Q9D3D9 (pp) Q9CQH3" source="4148" target="4178" cy:directed="1"/>
      <edge id="4938" label="Q9D3D9 (pp) Q9ERS2" source="4148" target="4277" cy:directed="1"/>
      <edge id="4937" label="Q9D3D9 (pp) O09111" source="4148" target="4149" cy:directed="1"/>
      <edge id="4936" label="Q9D051 (pp) P06745" source="4147" target="4402" cy:directed="1"/>
      <edge id="4935" label="Q9D051 (pp) Q93092" source="4147" target="4392" cy:directed="1"/>
      <edge id="4934" label="Q9D051 (pp) P35486" source="4147" target="4377" cy:directed="1"/>
      <edge id="4933" label="Q9D051 (pp) Q99LC5" source="4147" target="4253" cy:directed="1"/>
      <edge id="4932" label="Q9D051 (pp) Q9DCJ5" source="4147" target="4318" cy:directed="1"/>
      <edge id="4931" label="Q9D051 (pp) Q05920" source="4147" target="4192" cy:directed="1"/>
      <edge id="4930" label="Q9D051 (pp) Q9CR68" source="4147" target="4205" cy:directed="1"/>
      <edge id="4929" label="Q9D051 (pp) Q9D2G2" source="4147" target="4225" cy:directed="1"/>
      <edge id="4928" label="Q9D051 (pp) Q9D0M3" source="4147" target="4188" cy:directed="1"/>
      <edge id="4927" label="Q9D051 (pp) Q9CQH3" source="4147" target="4178" cy:directed="1"/>
      <edge id="4926" label="Q9D051 (pp) P97807" source="4147" target="4278" cy:directed="1"/>
      <edge id="4925" label="Q9D051 (pp) Q8BMF3" source="4147" target="4482" cy:directed="1"/>
      <edge id="4924" label="Q9D051 (pp) P97450" source="4147" target="4368" cy:directed="1"/>
      <edge id="4923" label="Q9D051 (pp) P06151" source="4147" target="4176" cy:directed="1"/>
      <edge id="4922" label="Q9D051 (pp) P16054" source="4147" target="4381" cy:directed="1"/>
      <edge id="4921" label="Q9D051 (pp) P40142" source="4147" target="4297" cy:directed="1"/>
      <edge id="4920" label="Q9D051 (pp) Q9D6R2" source="4147" target="4174" cy:directed="1"/>
      <edge id="4919" label="Q9D051 (pp) P52480" source="4147" target="4393" cy:directed="1"/>
      <edge id="4918" label="Q9D051 (pp) Q9CQQ7" source="4147" target="4347" cy:directed="1"/>
      <edge id="4917" label="Q9D051 (pp) P63101" source="4147" target="4417" cy:directed="1"/>
      <edge id="4916" label="Q9D051 (pp) Q9DB77" source="4147" target="4343" cy:directed="1"/>
      <edge id="4915" label="Q9D051 (pp) Q8BMF4" source="4147" target="4191" cy:directed="1"/>
      <edge id="4914" label="Q9D051 (pp) Q91VD9" source="4147" target="4203" cy:directed="1"/>
      <edge id="4913" label="Q9D051 (pp) Q03265" source="4147" target="4150" cy:directed="1"/>
      <edge id="4912" label="O08749 (pp) P56480" source="4146" target="4196" cy:directed="1"/>
      <edge id="4911" label="O08749 (pp) Q9DC69" source="4146" target="4345" cy:directed="1"/>
      <edge id="4910" label="O08749 (pp) Q91ZJ5" source="4146" target="4552" cy:directed="1"/>
      <edge id="4909" label="O08749 (pp) P35486" source="4146" target="4377" cy:directed="1"/>
      <edge id="4908" label="O08749 (pp) Q9D6R2" source="4146" target="4174" cy:directed="1"/>
      <edge id="4907" label="O08749 (pp) Q9D2G2" source="4146" target="4225" cy:directed="1"/>
      <edge id="4906" label="O08749 (pp) P08249" source="4146" target="4173" cy:directed="1"/>
      <edge id="4905" label="O08749 (pp) Q9DB77" source="4146" target="4343" cy:directed="1"/>
      <edge id="4904" label="O08749 (pp) P52480" source="4146" target="4393" cy:directed="1"/>
      <edge id="4903" label="O08749 (pp) Q9CQA3" source="4146" target="4250" cy:directed="1"/>
      <edge id="4902" label="O08749 (pp) Q9CZU6" source="4146" target="4159" cy:directed="1"/>
      <edge id="4901" label="O08749 (pp) Q8K2B3" source="4146" target="4285" cy:directed="1"/>
      <edge id="4900" label="O08749 (pp) Q91VR2" source="4146" target="4201" cy:directed="1"/>
      <edge id="4899" label="O08749 (pp) P09671" source="4146" target="4382" cy:directed="1"/>
      <edge id="4898" label="O08749 (pp) Q9CQH3" source="4146" target="4178" cy:directed="1"/>
      <edge id="4897" label="O08749 (pp) Q91VD9" source="4146" target="4203" cy:directed="1"/>
      <edge id="4896" label="O08749 (pp) O88441" source="4146" target="4233" cy:directed="1"/>
      <edge id="4895" label="O08749 (pp) P99029" source="4146" target="4294" cy:directed="1"/>
      <edge id="4894" label="O08749 (pp) P63038" source="4146" target="4185" cy:directed="1"/>
      <edge id="4893" label="O08749 (pp) Q8BMF4" source="4146" target="4191" cy:directed="1"/>
      <edge id="4892" label="O08749 (pp) Q8BKZ9" source="4146" target="4451" cy:directed="1"/>
      <edge id="4891" label="O08749 (pp) Q9D6J6" source="4146" target="4145" cy:directed="1"/>
      <edge id="4890" label="O08749 (pp) Q60597" source="4146" target="4449" cy:directed="1"/>
      <edge id="4889" label="O08749 (pp) Q9WUM5" source="4146" target="4214" cy:directed="1"/>
      <edge id="4888" label="O08749 (pp) Q9Z2I9" source="4146" target="4396" cy:directed="1"/>
      <edge id="4887" label="O08749 (pp) Q99KI0" source="4146" target="4276" cy:directed="1"/>
      <edge id="4886" label="O08749 (pp) Q60931" source="4146" target="4494" cy:directed="1"/>
      <edge id="4885" label="O08749 (pp) Q6PB66" source="4146" target="4436" cy:directed="1"/>
      <edge id="4884" label="O08749 (pp) Q99LC5" source="4146" target="4253" cy:directed="1"/>
      <edge id="4883" label="O08749 (pp) Q03265" source="4146" target="4150" cy:directed="1"/>
      <edge id="4882" label="O08749 (pp) Q91YT0" source="4146" target="4317" cy:directed="1"/>
      <edge id="4881" label="O08749 (pp) P97807" source="4146" target="4278" cy:directed="1"/>
      <edge id="4880" label="O08749 (pp) Q9D051" source="4146" target="4147" cy:directed="1"/>
      <edge id="4879" label="Q9D6J6 (pp) Q01097" source="4145" target="4142" cy:directed="1"/>
      <edge id="4878" label="Q9CQZ5 (pp) Q9Z1P6" source="4144" target="4237" cy:directed="1"/>
      <edge id="4877" label="Q9CQZ5 (pp) Q9DB77" source="4144" target="4343" cy:directed="1"/>
      <edge id="4876" label="Q9CQZ5 (pp) Q9CQH3" source="4144" target="4178" cy:directed="1"/>
      <edge id="4875" label="Q9CQZ5 (pp) Q99LX0" source="4144" target="4255" cy:directed="1"/>
      <edge id="4874" label="Q9CQZ5 (pp) Q9D0M3" source="4144" target="4188" cy:directed="1"/>
      <edge id="4873" label="Q9CQZ5 (pp) Q8K3J1" source="4144" target="4342" cy:directed="1"/>
      <edge id="4872" label="Q9CQZ5 (pp) Q9DCJ5" source="4144" target="4318" cy:directed="1"/>
      <edge id="4871" label="Q9CQZ5 (pp) Q9WUM5" source="4144" target="4214" cy:directed="1"/>
      <edge id="4870" label="Q9CQZ5 (pp) Q9ERS2" source="4144" target="4277" cy:directed="1"/>
      <edge id="4869" label="Q9CQZ5 (pp) Q9D3D9" source="4144" target="4148" cy:directed="1"/>
      <edge id="4868" label="Q9CQZ5 (pp) Q9CQ54" source="4144" target="4170" cy:directed="1"/>
      <edge id="4867" label="Q9CQZ5 (pp) Q9DB20" source="4144" target="4177" cy:directed="1"/>
      <edge id="4866" label="Q9CQZ5 (pp) Q9DCX2" source="4144" target="4304" cy:directed="1"/>
      <edge id="4865" label="Q9CQZ5 (pp) Q06185" source="4144" target="4209" cy:directed="1"/>
      <edge id="4864" label="Q9CQZ5 (pp) Q9DCS9" source="4144" target="4204" cy:directed="1"/>
      <edge id="4863" label="Q9CQZ5 (pp) Q9D6J5" source="4144" target="4425" cy:directed="1"/>
      <edge id="4862" label="Q9CQZ5 (pp) Q99LC3" source="4144" target="4189" cy:directed="1"/>
      <edge id="4861" label="Q9CQZ5 (pp) Q9D0S9" source="4144" target="4211" cy:directed="1"/>
      <edge id="4860" label="Q9CQZ5 (pp) Q9DC69" source="4144" target="4345" cy:directed="1"/>
      <edge id="4859" label="Q9CQZ5 (pp) Q9CZ13" source="4144" target="4187" cy:directed="1"/>
      <edge id="4858" label="Q9CQZ5 (pp) Q9CR68" source="4144" target="4205" cy:directed="1"/>
      <edge id="4857" label="Q9CQZ5 (pp) Q62425" source="4144" target="4483" cy:directed="1"/>
      <edge id="4856" label="Q9CQZ5 (pp) Q9CQQ7" source="4144" target="4347" cy:directed="1"/>
      <edge id="4855" label="Q9CQZ5 (pp) Q3UIU2" source="4144" target="4226" cy:directed="1"/>
      <edge id="4854" label="Q9CQZ5 (pp) Q9CQC7" source="4144" target="4432" cy:directed="1"/>
      <edge id="4853" label="Q9CQZ5 (pp) Q9CPQ8" source="4144" target="4202" cy:directed="1"/>
      <edge id="4852" label="Q9CQZ5 (pp) P99029" source="4144" target="4294" cy:directed="1"/>
      <edge id="4851" label="Q9CQZ5 (pp) Q99LC5" source="4144" target="4253" cy:directed="1"/>
      <edge id="4850" label="Q9CQZ5 (pp) Q9CQ69" source="4144" target="4172" cy:directed="1"/>
      <edge id="4849" label="Q9CQZ5 (pp) Q91YT0" source="4144" target="4317" cy:directed="1"/>
      <edge id="4848" label="Q9CQZ5 (pp) P97450" source="4144" target="4368" cy:directed="1"/>
      <edge id="4847" label="Q9CQZ5 (pp) O09111" source="4144" target="4149" cy:directed="1"/>
      <edge id="4846" label="Q9CQZ5 (pp) P19536" source="4144" target="4311" cy:directed="1"/>
      <edge id="4845" label="Q9CQZ5 (pp) Q9CQZ6" source="4144" target="4169" cy:directed="1"/>
      <edge id="4844" label="Q9CQZ5 (pp) Q9CPP6" source="4144" target="4219" cy:directed="1"/>
      <edge id="4843" label="Q9CQZ5 (pp) Q91VD9" source="4144" target="4203" cy:directed="1"/>
      <edge id="4842" label="Q9CQZ5 (pp) Q91VR2" source="4144" target="4201" cy:directed="1"/>
      <edge id="4841" label="Q9CQZ5 (pp) P48771" source="4144" target="4241" cy:directed="1"/>
      <edge id="4840" label="Q9CQZ5 (pp) Q9D6J6" source="4144" target="4145" cy:directed="1"/>
      <edge id="4839" label="Q80Z38 (pp) P35438" source="4143" target="4153" cy:directed="1"/>
      <edge id="4838" label="Q80Z38 (pp) Q8BYM5" source="4143" target="4530" cy:directed="1"/>
      <edge id="4837" label="Q01097 (pp) P12382" source="4142" target="4152" cy:directed="1"/>
      <edge id="4836" label="Q01097 (pp) A2CG49" source="4142" target="4730" cy:directed="1"/>
      <edge id="4835" label="Q01097 (pp) P15116" source="4142" target="4444" cy:directed="1"/>
      <edge id="4834" label="Q01097 (pp) P57780" source="4142" target="4672" cy:directed="1"/>
      <edge id="4833" label="Q01097 (pp) P31324" source="4142" target="4437" cy:directed="1"/>
      <edge id="4832" label="Q01097 (pp) Q61879" source="4142" target="4416" cy:directed="1"/>
      <edge id="4831" label="Q01097 (pp) P68181" source="4142" target="4569" cy:directed="1"/>
      <edge id="4830" label="Q01097 (pp) O35129" source="4142" target="4349" cy:directed="1"/>
      <edge id="4829" label="Q01097 (pp) P35436" source="4142" target="4158" cy:directed="1"/>
      <edge id="4828" label="Q01097 (pp) P53994" source="4142" target="4731" cy:directed="1"/>
      <edge id="4827" label="Q01097 (pp) P46660" source="4142" target="4339" cy:directed="1"/>
      <edge id="4826" label="Q01097 (pp) P63330" source="4142" target="4167" cy:directed="1"/>
      <edge id="4825" label="Q01097 (pp) P39053" source="4142" target="4435" cy:directed="1"/>
      <edge id="4824" label="Q01097 (pp) Q9QXS6" source="4142" target="4477" cy:directed="1"/>
      <edge id="4823" label="Q01097 (pp) D3YVF0" source="4142" target="4728" cy:directed="1"/>
      <edge id="4822" label="Q01097 (pp) P30999" source="4142" target="4522" cy:directed="1"/>
      <edge id="4821" label="Q01097 (pp) P35438" source="4142" target="4153" cy:directed="1"/>
      <edge id="4820" label="Q01097 (pp) P62874" source="4142" target="4299" cy:directed="1"/>
      <edge id="4819" label="Q01097 (pp) P05202" source="4142" target="4154" cy:directed="1"/>
      <edge id="4818" label="Q01097 (pp) P13020" source="4142" target="4715" cy:directed="1"/>
      <edge id="4817" label="Q01097 (pp) P11627" source="4142" target="4499" cy:directed="1"/>
      <edge id="4816" label="Q01097 (pp) P08551" source="4142" target="4653" cy:directed="1"/>
      <edge id="4815" label="Q01097 (pp) Q9CVB6" source="4142" target="4431" cy:directed="1"/>
      <edge id="4814" label="Q01097 (pp) P43006" source="4142" target="4711" cy:directed="1"/>
      <edge id="4813" label="Q01097 (pp) P06837" source="4142" target="4445" cy:directed="1"/>
      <edge id="4812" label="Q01097 (pp) O88737" source="4142" target="4433" cy:directed="1"/>
      <edge id="4811" label="Q01097 (pp) P17751" source="4142" target="4235" cy:directed="1"/>
      <edge id="4810" label="Q01097 (pp) Q8BH59" source="4142" target="4703" cy:directed="1"/>
      <edge id="4809" label="Q01097 (pp) P63011" source="4142" target="4485" cy:directed="1"/>
      <edge id="4808" label="Q01097 (pp) F6SEU4" source="4142" target="4701" cy:directed="1"/>
      <edge id="4807" label="Q01097 (pp) P59999" source="4142" target="4430" cy:directed="1"/>
      <edge id="4806" label="Q01097 (pp) P63001" source="4142" target="4336" cy:directed="1"/>
      <edge id="4805" label="Q01097 (pp) P63328" source="4142" target="4553" cy:directed="1"/>
      <edge id="4804" label="Q01097 (pp) P46096" source="4142" target="4628" cy:directed="1"/>
      <edge id="4803" label="Q01097 (pp) Q9JM76" source="4142" target="4316" cy:directed="1"/>
      <edge id="4802" label="Q01097 (pp) Q923T9" source="4142" target="4400" cy:directed="1"/>
      <edge id="4801" label="Q01097 (pp) O08599" source="4142" target="4612" cy:directed="1"/>
      <edge id="4800" label="Q01097 (pp) P48962" source="4142" target="4636" cy:directed="1"/>
      <edge id="4799" label="Q01097 (pp) P62259" source="4142" target="4163" cy:directed="1"/>
      <edge id="4798" label="Q01097 (pp) Q61411" source="4142" target="4578" cy:directed="1"/>
      <edge id="4797" label="Q01097 (pp) P62204" source="4142" target="4517" cy:directed="1"/>
      <edge id="4796" label="Q01097 (pp) P08553" source="4142" target="4655" cy:directed="1"/>
      <edge id="4795" label="Q01097 (pp) P60710" source="4142" target="4280" cy:directed="1"/>
      <edge id="4794" label="Q01097 (pp) P61982" source="4142" target="4447" cy:directed="1"/>
      <edge id="4793" label="Q01097 (pp) P63321" source="4142" target="4639" cy:directed="1"/>
      <edge id="4792" label="Q01097 (pp) P35279" source="4142" target="4589" cy:directed="1"/>
      <edge id="4791" label="Q01097 (pp) Q91VR2" source="4142" target="4201" cy:directed="1"/>
      <edge id="4790" label="Q01097 (pp) O55100" source="4142" target="4620" cy:directed="1"/>
      <edge id="4789" label="Q01097 (pp) P68404" source="4142" target="4198" cy:directed="1"/>
      <edge id="4788" label="Q01097 (pp) P97772" source="4142" target="4439" cy:directed="1"/>
      <edge id="4787" label="Q01097 (pp) P63318" source="4142" target="4604" cy:directed="1"/>
      <edge id="4786" label="Q01097 (pp) P50516" source="4142" target="4231" cy:directed="1"/>
      <edge id="4785" label="Q01097 (pp) P05480" source="4142" target="4282" cy:directed="1"/>
      <edge id="4784" label="Q01097 (pp) O88952" source="4142" target="4182" cy:directed="1"/>
      <edge id="4783" label="Q01097 (pp) P60879" source="4142" target="4319" cy:directed="1"/>
      <edge id="4782" label="Q01097 (pp) P06151" source="4142" target="4176" cy:directed="1"/>
      <edge id="4781" label="Q01097 (pp) P16858" source="4142" target="4497" cy:directed="1"/>
      <edge id="4780" label="Q01097 (pp) P51863" source="4142" target="4161" cy:directed="1"/>
      <edge id="4779" label="Q01097 (pp) P16054" source="4142" target="4381" cy:directed="1"/>
      <edge id="4778" label="Q01097 (pp) P31938" source="4142" target="4227" cy:directed="1"/>
      <edge id="4777" label="Q01097 (pp) P20357" source="4142" target="4558" cy:directed="1"/>
      <edge id="4776" label="Q01097 (pp) P05063" source="4142" target="4450" cy:directed="1"/>
      <edge id="4775" label="Q01097 (pp) P47757" source="4142" target="4164" cy:directed="1"/>
      <edge id="4774" label="Q01097 (pp) P68369" source="4142" target="4286" cy:directed="1"/>
      <edge id="4773" label="Q01097 (pp) P68033" source="4142" target="4509" cy:directed="1"/>
      <edge id="4772" label="Q01097 (pp) P17426" source="4142" target="4229" cy:directed="1"/>
      <edge id="4771" label="Q01097 (pp) P63101" source="4142" target="4417" cy:directed="1"/>
      <edge id="4770" label="Q01097 (pp) Q9D6M3" source="4142" target="4468" cy:directed="1"/>
      <edge id="4769" label="Q01097 (pp) Q6PHZ2" source="4142" target="4279" cy:directed="1"/>
      <edge id="4768" label="Q01097 (pp) P62835" source="4142" target="4463" cy:directed="1"/>
      <edge id="4767" label="Q01097 (pp) Q03265" source="4142" target="4150" cy:directed="1"/>
      <edge id="4766" label="Q01097 (pp) P47754" source="4142" target="4375" cy:directed="1"/>
      <edge id="4765" label="Q01097 (pp) P63085" source="4142" target="4193" cy:directed="1"/>
      <edge id="4764" label="Q01097 (pp) P12367" source="4142" target="4355" cy:directed="1"/>
      <edge id="4763" label="Q01097 (pp) Q60676" source="4142" target="4333" cy:directed="1"/>
      <edge id="4762" label="Q01097 (pp) P68510" source="4142" target="4151" cy:directed="1"/>
      <edge id="4761" label="Q01097 (pp) P51881" source="4142" target="4283" cy:directed="1"/>
      <edge id="4760" label="Q01097 (pp) O35526" source="4142" target="4267" cy:directed="1"/>
      <edge id="4759" label="Q01097 (pp) P15105" source="4142" target="4220" cy:directed="1"/>
      <edge id="4758" label="Q01097 (pp) P05132" source="4142" target="4207" cy:directed="1"/>
      <edge id="4757" label="Q01097 (pp) Q80Z38" source="4142" target="4143" cy:directed="1"/>
    </graph>
  </att>
</graph>
