# Supplementary material for: APP Is a Context-Sensitive Regulator of the Hippocampal Presynaptic Active Zone
Source: PLOS journal article supplement (doi:10.1371/journal.pcbi.1004832), 2016-04-19
Supplement: S6 (10.1371/journal.pcbi.1004832.s006) [file journal.pcbi.1004832.s006.cys › CytoscapeSession-2016_01_22-10_07/networks/8147-Core+Network+Communities.xgmml]

<?xml version="1.0" encoding="UTF-8" standalone="yes"?>
<graph id="8147" label="Core Network Communities" cy:view="0" cy:registered="0" cy:documentVersion="3.0" xmlns:dc="http://purl.org/dc/elements/1.1/" xmlns:xlink="http://www.w3.org/1999/xlink" xmlns:rdf="http://www.w3.org/1999/02/22-rdf-syntax-ns#" xmlns:cy="http://www.cytoscape.org" xmlns="http://www.cs.rpi.edu/XGMML">
  <att>
    <graph id="8163" label="Communities" cy:registered="1">
      <node id="8787" label="Q00493"/>
      <node id="8786" label="Q9R1V4"/>
      <node id="8785" label="Q9R0P5"/>
      <node id="8784" label="O88342"/>
      <node id="8783" label="Q9DB73"/>
      <node id="8782" label="O54774"/>
      <node id="8781" label="Q8VHW2"/>
      <node id="8780" label="P58771"/>
      <node id="8779" label="Q03137"/>
      <node id="8778" label="Q9QYX7"/>
      <node id="8777" label="P23927"/>
      <node id="8776" label="Q9EQZ6"/>
      <node id="8775" label="P35802"/>
      <node id="8774" label="P80560"/>
      <node id="8773" label="Q60737"/>
      <node id="8772" label="Q9CR95"/>
      <node id="8771" label="Q4KMM3"/>
      <node id="8770" label="Q9Z0E0"/>
      <node id="8769" label="Q812A2"/>
      <node id="8768" label="Q9QZF2"/>
      <node id="8767" label="Q91ZZ3"/>
      <node id="8766" label="Q8K400"/>
      <node id="8765" label="Q91WS0"/>
      <node id="8764" label="Q9JIA1"/>
      <node id="8763" label="O89053"/>
      <node id="8762" label="P53994"/>
      <node id="8761" label="A2CG49"/>
      <node id="8760" label="Q810U4"/>
      <node id="8759" label="D3YVF0"/>
      <node id="8758" label="Q9ES97"/>
      <node id="8757" label="Q9R1V7"/>
      <node id="8756" label="Q6URW6"/>
      <node id="8755" label="Q9D6K5"/>
      <node id="8754" label="Q99KB8"/>
      <node id="8753" label="Q9CYT6"/>
      <node id="8752" label="Q9D8Y0"/>
      <node id="8751" label="Q9Z0P4"/>
      <node id="8750" label="Q04447"/>
      <node id="8749" label="Q9Z2W9"/>
      <node id="8748" label="Q63810"/>
      <node id="8747" label="Q61330"/>
      <node id="8746" label="P13020"/>
      <node id="8745" label="Q8K0T0"/>
      <node id="8744" label="Q9CWS0"/>
      <node id="8743" label="Q80XN0"/>
      <node id="8742" label="P43006"/>
      <node id="8741" label="Q9ERD7"/>
      <node id="8740" label="Q921J2"/>
      <node id="8739" label="Q9CQW1"/>
      <node id="8738" label="Q6P9K9"/>
      <node id="8737" label="Q9CZW5"/>
      <node id="8736" label="P20152"/>
      <node id="8735" label="Q8BRT1"/>
      <node id="8734" label="Q8BH59"/>
      <node id="8733" label="Q921M7"/>
      <node id="8732" label="F6SEU4"/>
      <node id="8731" label="Q8R366"/>
      <node id="8730" label="Q9QYA2"/>
      <node id="8729" label="Q61206"/>
      <node id="8728" label="Q3ULJ0"/>
      <node id="8727" label="Q8CGK3"/>
      <node id="8726" label="Q03157"/>
      <node id="8725" label="Q8R5C5"/>
      <node id="8724" label="Q78IK2"/>
      <node id="8723" label="Q91VT4"/>
      <node id="8722" label="Q61151"/>
      <node id="8721" label="Q3THE2"/>
      <node id="8720" label="Q920P5"/>
      <node id="8719" label="Q2PFD7"/>
      <node id="8718" label="Q7TMM9"/>
      <node id="8717" label="Q68FH0"/>
      <node id="8716" label="Q91VR7"/>
      <node id="8715" label="Q9CR62"/>
      <node id="8714" label="Q8CHH9"/>
      <node id="8713" label="P97300"/>
      <node id="8712" label="Q60634"/>
      <node id="8711" label="O08917"/>
      <node id="8710" label="Q61316"/>
      <node id="8709" label="Q9D1T0"/>
      <node id="8708" label="P48036"/>
      <node id="8707" label="P11798"/>
      <node id="8706" label="Q8K183"/>
      <node id="8705" label="Q99NE5"/>
      <node id="8704" label="Q9CR16"/>
      <node id="8703" label="P57780"/>
      <node id="8702" label="Q9QY76"/>
      <node id="8701" label="P23242"/>
      <node id="8700" label="Q9R1V6"/>
      <node id="8699" label="P48758"/>
      <node id="8698" label="Q91XV3"/>
      <node id="8697" label="P55302"/>
      <node id="8696" label="Q8BIJ6"/>
      <node id="8695" label="O88643"/>
      <node id="8694" label="Q80TZ3"/>
      <node id="8693" label="Q7TMB8"/>
      <node id="8692" label="Q9WV55"/>
      <node id="8691" label="O55131"/>
      <node id="8690" label="O35136"/>
      <node id="8689" label="Q7TSJ2"/>
      <node id="8688" label="P12960"/>
      <node id="8687" label="Q61699"/>
      <node id="8686" label="P08553"/>
      <node id="8685" label="Q8K4Z3"/>
      <node id="8684" label="P08551"/>
      <node id="8683" label="Q8VDQ8"/>
      <node id="8682" label="O54983"/>
      <node id="8681" label="P40124"/>
      <node id="8680" label="P18760"/>
      <node id="8679" label="Q9Z2I0"/>
      <node id="8678" label="Q9Z2Q6"/>
      <node id="8677" label="Q9WV34"/>
      <node id="8676" label="P42208"/>
      <node id="8675" label="P28661"/>
      <node id="8674" label="P26645"/>
      <node id="8673" label="P84096"/>
      <node id="8672" label="O35143"/>
      <node id="8671" label="P48722"/>
      <node id="8670" label="P63321"/>
      <node id="8669" label="Q8K021"/>
      <node id="8668" label="Q8CI94"/>
      <node id="8667" label="P48962"/>
      <node id="8666" label="Q71LX4"/>
      <node id="8665" label="P43406"/>
      <node id="8664" label="Q9D880"/>
      <node id="8663" label="O35857"/>
      <node id="8662" label="Q9CWZ7"/>
      <node id="8661" label="P28740"/>
      <node id="8660" label="Q922H2"/>
      <node id="8659" label="P46096"/>
      <node id="8658" label="Q61490"/>
      <node id="8657" label="Q9CZ42"/>
      <node id="8656" label="P35564"/>
      <node id="8655" label="P19096"/>
      <node id="8654" label="Q61644"/>
      <node id="8653" label="Q8BZ98"/>
      <node id="8652" label="Q5RJI5"/>
      <node id="8651" label="O55100"/>
      <node id="8650" label="P61164"/>
      <node id="8649" label="Q8R191"/>
      <node id="8648" label="O35643"/>
      <node id="8647" label="Q99P72"/>
      <node id="8646" label="Q60930"/>
      <node id="8645" label="P20444"/>
      <node id="8644" label="Q9QXS1"/>
      <node id="8643" label="O08599"/>
      <node id="8642" label="Q8BW75"/>
      <node id="8641" label="O35239"/>
      <node id="8640" label="Q5DQR4"/>
      <node id="8639" label="Q9EPJ9"/>
      <node id="8638" label="P00405"/>
      <node id="8637" label="P56564"/>
      <node id="8636" label="P70296"/>
      <node id="8635" label="P63318"/>
      <node id="8634" label="P27546"/>
      <node id="8633" label="P58281"/>
      <node id="8632" label="Q8R3V5"/>
      <node id="8631" label="P67871"/>
      <node id="8630" label="Q810U3"/>
      <node id="8629" label="Q61553"/>
      <node id="8628" label="Q80U28"/>
      <node id="8627" label="P19246"/>
      <node id="8626" label="P62743"/>
      <node id="8625" label="P22723"/>
      <node id="8624" label="Q60605"/>
      <node id="8623" label="P47708"/>
      <node id="8622" label="Q8VBV7"/>
      <node id="8621" label="Q9DC28"/>
      <node id="8620" label="P35279"/>
      <node id="8619" label="Q9CRB9"/>
      <node id="8618" label="Q9CQI6"/>
      <node id="8617" label="P62821"/>
      <node id="8616" label="P50396"/>
      <node id="8615" label="Q9WU78"/>
      <node id="8614" label="P0C0A3"/>
      <node id="8613" label="Q9R0P9"/>
      <node id="8612" label="Q80UU9"/>
      <node id="8611" label="O55023"/>
      <node id="8610" label="Q60875"/>
      <node id="8609" label="Q61411"/>
      <node id="8608" label="Q8CHC4"/>
      <node id="8607" label="Q91VZ6"/>
      <node id="8606" label="Q9WUB3"/>
      <node id="8605" label="Q62465"/>
      <node id="8604" label="Q9D0F9"/>
      <node id="8603" label="Q9R111"/>
      <node id="8602" label="Q6PIC6"/>
      <node id="8601" label="Q80VP1"/>
      <node id="8600" label="P68181"/>
      <node id="8599" label="P28663"/>
      <node id="8598" label="Q6P1F6"/>
      <node id="8597" label="P41216"/>
      <node id="8596" label="Q9D6F9"/>
      <node id="8595" label="Q99PJ0"/>
      <node id="8594" label="Q99MR8"/>
      <node id="8593" label="Q8BH04"/>
      <node id="8592" label="Q8BWF0"/>
      <node id="8591" label="Q91WC3"/>
      <node id="8590" label="Q3UVX5"/>
      <node id="8589" label="P20357"/>
      <node id="8588" label="P01831"/>
      <node id="8587" label="Q9D8B3"/>
      <node id="8586" label="P28667"/>
      <node id="8585" label="O55042"/>
      <node id="8584" label="P63328"/>
      <node id="8583" label="Q91ZJ5"/>
      <node id="8582" label="P60469"/>
      <node id="8581" label="Q62419"/>
      <node id="8580" label="P45376"/>
      <node id="8579" label="O54991"/>
      <node id="8578" label="B9EKR1"/>
      <node id="8577" label="Q9QYR6"/>
      <node id="8576" label="O08585"/>
      <node id="8575" label="Q60932"/>
      <node id="8574" label="Q3UHL1"/>
      <node id="8573" label="Q9CPQ1"/>
      <node id="8572" label="Q5SQX6"/>
      <node id="8571" label="Q80Y14"/>
      <node id="8570" label="Q9Z0R4"/>
      <node id="8569" label="P00493"/>
      <node id="8568" label="P60761"/>
      <node id="8567" label="Q64332"/>
      <node id="8566" label="O70318"/>
      <node id="8565" label="O08539"/>
      <node id="8564" label="Q9CS84"/>
      <node id="8563" label="P40630"/>
      <node id="8562" label="Q9JIS5"/>
      <node id="8561" label="Q8BYM5"/>
      <node id="8560" label="Q4ACU6"/>
      <node id="8559" label="P48453"/>
      <node id="8558" label="Q925I1"/>
      <node id="8557" label="Q62261"/>
      <node id="8556" label="Q9R0N7"/>
      <node id="8555" label="Q60996"/>
      <node id="8554" label="P62482"/>
      <node id="8553" label="P30999"/>
      <node id="8552" label="Q68FF6"/>
      <node id="8551" label="P23818"/>
      <node id="8550" label="Q9DBJ1"/>
      <node id="8549" label="P68254"/>
      <node id="8548" label="P62204"/>
      <node id="8547" label="P17156"/>
      <node id="8546" label="Q99K85"/>
      <node id="8545" label="P28652"/>
      <node id="8544" label="P70414"/>
      <node id="8543" label="Q6PIE5"/>
      <node id="8542" label="P47802"/>
      <node id="8541" label="Q9R0Y5"/>
      <node id="8540" label="P68033"/>
      <node id="8539" label="Q9QXJ1"/>
      <node id="8538" label="P84091"/>
      <node id="8537" label="Q9Z218"/>
      <node id="8536" label="P99024"/>
      <node id="8535" label="P03995"/>
      <node id="8534" label="P16330"/>
      <node id="8533" label="O70589"/>
      <node id="8532" label="Q8BKX1"/>
      <node id="8531" label="P13595"/>
      <node id="8530" label="P11627"/>
      <node id="8529" label="P62746"/>
      <node id="8528" label="P16858"/>
      <node id="8527" label="Q8VD37"/>
      <node id="8526" label="Q8QZT1"/>
      <node id="8525" label="Q60931"/>
      <node id="8524" label="P17665"/>
      <node id="8523" label="Q9JLZ3"/>
      <node id="8522" label="Q8CAQ8"/>
      <node id="8521" label="Q99L43"/>
      <node id="8520" label="Q8VDP6"/>
      <node id="8519" label="Q9Z0X1"/>
      <node id="8518" label="P61161"/>
      <node id="8517" label="Q60598"/>
      <node id="8516" label="P63011"/>
      <node id="8515" label="P38647"/>
      <node id="8514" label="Q62425"/>
      <node id="8513" label="Q8BMF3"/>
      <node id="8512" label="Q9Z1J3"/>
      <node id="8511" label="Q9DCB8"/>
      <node id="8510" label="O88712"/>
      <node id="8509" label="Q8BHL5"/>
      <node id="8508" label="Q9QXS6"/>
      <node id="8507" label="P17183"/>
      <node id="8506" label="Q6IRU5"/>
      <node id="8505" label="Q9DBG3"/>
      <node id="8504" label="P55088"/>
      <node id="8503" label="P10637"/>
      <node id="8502" label="Q922R8"/>
      <node id="8501" label="P68368"/>
      <node id="8500" label="P47857"/>
      <node id="8499" label="Q9D6M3"/>
      <node id="8498" label="Q62048"/>
      <node id="8497" label="Q99104"/>
      <node id="8496" label="P60766"/>
      <node id="8495" label="Q6R891"/>
      <node id="8494" label="P62835"/>
      <node id="8493" label="Q8BLK3"/>
      <node id="8492" label="Q91ZX7"/>
      <node id="8491" label="P08226"/>
      <node id="8490" label="Q8R0S4"/>
      <node id="8489" label="Q61290"/>
      <node id="8488" label="P42125"/>
      <node id="8487" label="Q8BGD5"/>
      <node id="8486" label="Q9Z268"/>
      <node id="8485" label="Q8BMS1"/>
      <node id="8484" label="P17182"/>
      <node id="8483" label="Q9CPW4"/>
      <node id="8482" label="Q8BKZ9"/>
      <node id="8481" label="P05063"/>
      <node id="8480" label="Q60597"/>
      <node id="8479" label="Q9WUA3"/>
      <node id="8478" label="P61982"/>
      <node id="8477" label="P07901"/>
      <node id="8476" label="P06837"/>
      <node id="8475" label="P15116"/>
      <node id="8474" label="Q7TQF7"/>
      <node id="8473" label="Q99L47"/>
      <node id="8472" label="P29758"/>
      <node id="8471" label="Q8CHT0"/>
      <node id="8470" label="P97772"/>
      <node id="8469" label="Q8BR92"/>
      <node id="8468" label="P31324"/>
      <node id="8467" label="Q6PB66"/>
      <node id="8466" label="P39053"/>
      <node id="8465" label="Q6PH08"/>
      <node id="8464" label="O88737"/>
      <node id="8463" label="Q9CQC7"/>
      <node id="8462" label="Q9CVB6"/>
      <node id="8461" label="P59999"/>
      <node id="8460" label="Q8CHU3"/>
      <node id="8459" label="Q5FWK3"/>
      <node id="8458" label="Q9WTT4"/>
      <node id="8457" label="Q00612"/>
      <node id="8456" label="Q9D6J5"/>
      <node id="8455" label="P23506"/>
      <node id="8454" label="Q6PCP5"/>
      <node id="8453" label="Q8VDN2"/>
      <node id="8452" label="Q64516"/>
      <node id="8451" label="Q9DBF1"/>
      <node id="8450" label="Q8R001"/>
      <node id="8449" label="Q9QWI6"/>
      <node id="8448" label="P63101"/>
      <node id="8447" label="Q61879"/>
      <node id="8446" label="Q91ZA3"/>
      <node id="8445" label="Q3UMR5"/>
      <node id="8444" label="P56382"/>
      <node id="8443" label="P09103"/>
      <node id="8442" label="P14873"/>
      <node id="8441" label="P43024"/>
      <node id="8440" label="Q62420"/>
      <node id="8439" label="Q9EP69"/>
      <node id="8438" label="P26040"/>
      <node id="8437" label="P70441"/>
      <node id="8436" label="P61264"/>
      <node id="8435" label="Q7TPR4"/>
      <node id="8434" label="Q3UTJ2"/>
      <node id="8433" label="P06745"/>
      <node id="8432" label="Q920I9"/>
      <node id="8431" label="Q923T9"/>
      <node id="8430" label="P63040"/>
      <node id="8429" label="Q61831"/>
      <node id="8428" label="P50544"/>
      <node id="8427" label="Q9Z2I9"/>
      <node id="8426" label="Q61301"/>
      <node id="8425" label="Q9DB05"/>
      <node id="8424" label="P52480"/>
      <node id="8423" label="Q93092"/>
      <node id="8422" label="Q9JHI5"/>
      <node id="8421" label="P53395"/>
      <node id="8420" label="Q9DBL1"/>
      <node id="8419" label="Q8K1M6"/>
      <node id="8418" label="Q9CQ92"/>
      <node id="8417" label="P63082"/>
      <node id="8416" label="Q8BPN8"/>
      <node id="8415" label="O35465"/>
      <node id="8414" label="P18572"/>
      <node id="8413" label="P09671"/>
      <node id="8412" label="P16054"/>
      <node id="8411" label="P62962"/>
      <node id="8410" label="Q61102"/>
      <node id="8409" label="P22315"/>
      <node id="8408" label="P35486"/>
      <node id="8407" label="Q9CZT8"/>
      <node id="8406" label="P47754"/>
      <node id="8405" label="P14094"/>
      <node id="8404" label="Q99JY9"/>
      <node id="8403" label="Q99MN9"/>
      <node id="8402" label="Q99PT1"/>
      <node id="8401" label="P62823"/>
      <node id="8400" label="O88935"/>
      <node id="8399" label="P97450"/>
      <node id="8398" label="Q64010"/>
      <node id="8397" label="Q9JLM8"/>
      <node id="8396" label="P20108"/>
      <node id="8395" label="Q9QUH0"/>
      <node id="8394" label="Q64521"/>
      <node id="8393" label="P13707"/>
      <node id="8392" label="Q9R0K7"/>
      <node id="8391" label="Q80T41"/>
      <node id="8390" label="Q9D898"/>
      <node id="8389" label="P63017"/>
      <node id="8388" label="P45878"/>
      <node id="8387" label="Q61548"/>
      <node id="8386" label="P12367"/>
      <node id="8385" label="Q9D023"/>
      <node id="8384" label="P56379"/>
      <node id="8383" label="P18052"/>
      <node id="8382" label="P70232"/>
      <node id="8381" label="Q9CZS1"/>
      <node id="8380" label="O35129"/>
      <node id="8379" label="O88696"/>
      <node id="8378" label="Q9CQQ7"/>
      <node id="8377" label="Q9JJV2"/>
      <node id="8376" label="Q9DC69"/>
      <node id="8375" label="Q91VM9"/>
      <node id="8374" label="Q9DB77"/>
      <node id="8373" label="Q8K3J1"/>
      <node id="8372" label="Q9D855"/>
      <node id="8371" label="Q9JHU4"/>
      <node id="8370" label="P46660"/>
      <node id="8369" label="P63044"/>
      <node id="8368" label="Q62351"/>
      <node id="8367" label="P63001"/>
      <node id="8366" label="Q8BG51"/>
      <node id="8365" label="Q9CXZ1"/>
      <node id="8364" label="Q60676"/>
      <node id="8363" label="Q8JZN5"/>
      <node id="8362" label="Q8JZQ2"/>
      <node id="8361" label="P51174"/>
      <node id="8360" label="Q8VDD5"/>
      <node id="8359" label="P18872"/>
      <node id="8358" label="Q9CQ75"/>
      <node id="8357" label="P03930"/>
      <node id="8356" label="P49615"/>
      <node id="8355" label="P39688"/>
      <node id="8354" label="P04925"/>
      <node id="8353" label="Q99JY0"/>
      <node id="8352" label="O08756"/>
      <node id="8351" label="P28660"/>
      <node id="8350" label="P60879"/>
      <node id="8349" label="Q9DCJ5"/>
      <node id="8348" label="Q91YT0"/>
      <node id="8347" label="Q9JM76"/>
      <node id="8346" label="Q9R0Q6"/>
      <node id="8345" label="Q68FD5"/>
      <node id="8344" label="Q9QYJ0"/>
      <node id="8343" label="Q60864"/>
      <node id="8342" label="P19536"/>
      <node id="8341" label="Q99N28"/>
      <node id="8340" label="Q9JLB0"/>
      <node id="8339" label="Q8BVE3"/>
      <node id="8338" label="P50518"/>
      <node id="8337" label="P97797"/>
      <node id="8336" label="Q61735"/>
      <node id="8335" label="Q9DCX2"/>
      <node id="8334" label="Q7TMF3"/>
      <node id="8333" label="O35658"/>
      <node id="8332" label="Q99KR7"/>
      <node id="8331" label="Q9EQ20"/>
      <node id="8330" label="P62874"/>
      <node id="8329" label="P63213"/>
      <node id="8328" label="P40142"/>
      <node id="8327" label="Q9CQR4"/>
      <node id="8326" label="Q9CQV8"/>
      <node id="8325" label="P99029"/>
      <node id="8324" label="P62073"/>
      <node id="8323" label="Q62277"/>
      <node id="8322" label="Q60631"/>
      <node id="8321" label="P52503"/>
      <node id="8320" label="Q8R4N0"/>
      <node id="8319" label="Q3ULD5"/>
      <node id="8318" label="Q8VEM8"/>
      <node id="8317" label="P68369"/>
      <node id="8316" label="Q8K2B3"/>
      <node id="8315" label="Q91WD5"/>
      <node id="8314" label="P51881"/>
      <node id="8313" label="P05480"/>
      <node id="8312" label="Q02248"/>
      <node id="8311" label="P60710"/>
      <node id="8310" label="Q6PHZ2"/>
      <node id="8309" label="P97807"/>
      <node id="8308" label="Q9ERS2"/>
      <node id="8307" label="Q99KI0"/>
      <node id="8306" label="O08788"/>
      <node id="8305" label="Q99KJ8"/>
      <node id="8304" label="Q91Z53"/>
      <node id="8303" label="P26443"/>
      <node id="8302" label="Q62442"/>
      <node id="8301" label="Q9D172"/>
      <node id="8300" label="P56391"/>
      <node id="8299" label="Q9WV18"/>
      <node id="8298" label="O35526"/>
      <node id="8297" label="Q8R5M8"/>
      <node id="8296" label="Q9WV92"/>
      <node id="8295" label="P62814"/>
      <node id="8294" label="P12023"/>
      <node id="8293" label="P61922"/>
      <node id="8292" label="P48320"/>
      <node id="8291" label="P17710"/>
      <node id="8290" label="P05064"/>
      <node id="8289" label="P11499"/>
      <node id="8288" label="Q8K1Z0"/>
      <node id="8287" label="P62331"/>
      <node id="8286" label="Q99LX0"/>
      <node id="8285" label="Q8BGH2"/>
      <node id="8284" label="Q99LC5"/>
      <node id="8283" label="Q61425"/>
      <node id="8282" label="P12787"/>
      <node id="8281" label="Q9CQA3"/>
      <node id="8280" label="Q8BWT1"/>
      <node id="8279" label="Q921G7"/>
      <node id="8278" label="Q9Z1B3"/>
      <node id="8277" label="O70161"/>
      <node id="8276" label="Q6PER3"/>
      <node id="8275" label="P63005"/>
      <node id="8274" label="P47738"/>
      <node id="8273" label="Q64133"/>
      <node id="8272" label="P48771"/>
      <node id="8271" label="O70325"/>
      <node id="8270" label="P62812"/>
      <node id="8269" label="P63137"/>
      <node id="8268" label="Q9Z1P6"/>
      <node id="8267" label="P09411"/>
      <node id="8266" label="P17751"/>
      <node id="8265" label="Q7TQI3"/>
      <node id="8264" label="O88441"/>
      <node id="8263" label="P70404"/>
      <node id="8262" label="P50516"/>
      <node id="8261" label="P57746"/>
      <node id="8260" label="P17426"/>
      <node id="8259" label="P17427"/>
      <node id="8258" label="P31938"/>
      <node id="8257" label="Q3UIU2"/>
      <node id="8256" label="Q9D2G2"/>
      <node id="8255" label="P62897"/>
      <node id="8254" label="Q9CQ62"/>
      <node id="8253" label="Q08331"/>
      <node id="8252" label="P46460"/>
      <node id="8251" label="P15105"/>
      <node id="8250" label="Q9CPP6"/>
      <node id="8249" label="Q9DCW4"/>
      <node id="8248" label="P63037"/>
      <node id="8247" label="Q9CQN1"/>
      <node id="8246" label="Q9D0K2"/>
      <node id="8245" label="Q9WUM5"/>
      <node id="8244" label="Q9Z1G4"/>
      <node id="8243" label="Q9D1K2"/>
      <node id="8242" label="Q9D0S9"/>
      <node id="8241" label="Q9DC70"/>
      <node id="8240" label="Q06185"/>
      <node id="8239" label="Q9CQJ8"/>
      <node id="8238" label="P05132"/>
      <node id="8237" label="P52196"/>
      <node id="8236" label="Q9CR68"/>
      <node id="8235" label="Q9DCS9"/>
      <node id="8234" label="Q91VD9"/>
      <node id="8233" label="Q9CPQ8"/>
      <node id="8232" label="Q91VR2"/>
      <node id="8231" label="Q9JLJ2"/>
      <node id="8230" label="P67778"/>
      <node id="8229" label="P68404"/>
      <node id="8228" label="P17742"/>
      <node id="8227" label="P56480"/>
      <node id="8226" label="Q61598"/>
      <node id="8225" label="P61027"/>
      <node id="8224" label="P63085"/>
      <node id="8223" label="Q05920"/>
      <node id="8222" label="Q8BMF4"/>
      <node id="8221" label="Q99LY9"/>
      <node id="8220" label="Q99LC3"/>
      <node id="8219" label="Q9D0M3"/>
      <node id="8218" label="Q9CZ13"/>
      <node id="8217" label="Q8BH95"/>
      <node id="8216" label="P63038"/>
      <node id="8215" label="Q8BK64"/>
      <node id="8214" label="P19783"/>
      <node id="8213" label="O88952"/>
      <node id="8212" label="Q6P9K8"/>
      <node id="8211" label="Q9Z2H5"/>
      <node id="8210" label="Q3UHD9"/>
      <node id="8209" label="Q9CQH3"/>
      <node id="8208" label="Q9DB20"/>
      <node id="8207" label="P06151"/>
      <node id="8206" label="P54071"/>
      <node id="8205" label="Q9D6R2"/>
      <node id="8204" label="P08249"/>
      <node id="8203" label="Q9CQ69"/>
      <node id="8202" label="Q9DCT2"/>
      <node id="8201" label="Q9CQ54"/>
      <node id="8200" label="Q9CQZ6"/>
      <node id="8199" label="Q76MZ3"/>
      <node id="8198" label="P63330"/>
      <node id="8197" label="P16546"/>
      <node id="8196" label="Q8C8R3"/>
      <node id="8195" label="P47757"/>
      <node id="8194" label="P62259"/>
      <node id="8193" label="Q9Z1G3"/>
      <node id="8192" label="P51863"/>
      <node id="8191" label="Q9DCD0"/>
      <node id="8190" label="Q9CZU6"/>
      <node id="8189" label="P35436"/>
      <node id="8188" label="P23819"/>
      <node id="8187" label="Q06335"/>
      <node id="8186" label="Q9QUI0"/>
      <node id="8185" label="P05202"/>
      <node id="8184" label="P35438"/>
      <node id="8183" label="P12382"/>
      <node id="8182" label="P68510"/>
      <node id="8181" label="Q03265"/>
      <node id="8180" label="O09111"/>
      <node id="8179" label="Q9D3D9"/>
      <node id="8178" label="Q9D051"/>
      <node id="8177" label="O08749"/>
      <node id="8176" label="Q9D6J6"/>
      <node id="8175" label="Q9CQZ5"/>
      <node id="8174" label="Q80Z38"/>
      <node id="8173" label="Q01097"/>
      <edge id="12177" label="Q00493 (pp) P12023" source="8787" target="8294" cy:directed="1"/>
      <edge id="12176" label="Q9R1V4 (pp) Q9JIA1" source="8786" target="8764" cy:directed="1"/>
      <edge id="12175" label="O88342 (pp) P18760" source="8784" target="8680" cy:directed="1"/>
      <edge id="12174" label="O88342 (pp) P47757" source="8784" target="8195" cy:directed="1"/>
      <edge id="12173" label="O88342 (pp) Q9CVB6" source="8784" target="8462" cy:directed="1"/>
      <edge id="12172" label="Q9DB73 (pp) Q91VR2" source="8783" target="8232" cy:directed="1"/>
      <edge id="12171" label="O54774 (pp) Q68FD5" source="8782" target="8345" cy:directed="1"/>
      <edge id="12170" label="Q8VHW2 (pp) P23819" source="8781" target="8188" cy:directed="1"/>
      <edge id="12169" label="P58771 (pp) P16054" source="8780" target="8412" cy:directed="1"/>
      <edge id="12168" label="Q03137 (pp) P39688" source="8779" target="8355" cy:directed="1"/>
      <edge id="12167" label="Q9QYX7 (pp) Q9EQZ6" source="8778" target="8776" cy:directed="1"/>
      <edge id="12166" label="P23927 (pp) P16054" source="8777" target="8412" cy:directed="1"/>
      <edge id="12165" label="P80560 (pp) P18052" source="8774" target="8383" cy:directed="1"/>
      <edge id="12164" label="Q9CR95 (pp) P17427" source="8772" target="8259" cy:directed="1"/>
      <edge id="12163" label="Q4KMM3 (pp) P50516" source="8771" target="8262" cy:directed="1"/>
      <edge id="12162" label="Q9QZF2 (pp) P12023" source="8768" target="8294" cy:directed="1"/>
      <edge id="12161" label="Q91WS0 (pp) Q9CQH3" source="8765" target="8209" cy:directed="1"/>
      <edge id="12160" label="Q9JIA1 (pp) Q01097" source="8764" target="8173" cy:directed="1"/>
      <edge id="12159" label="P53994 (pp) Q61598" source="8762" target="8226" cy:directed="1"/>
      <edge id="12158" label="D3YVF0 (pp) P48453" source="8759" target="8559" cy:directed="1"/>
      <edge id="12157" label="D3YVF0 (pp) P35438" source="8759" target="8184" cy:directed="1"/>
      <edge id="12156" label="Q9ES97 (pp) Q99P72" source="8758" target="8647" cy:directed="1"/>
      <edge id="12155" label="Q9ES97 (pp) Q8K0T0" source="8758" target="8745" cy:directed="1"/>
      <edge id="12154" label="Q9R1V7 (pp) Q9JIA1" source="8757" target="8764" cy:directed="1"/>
      <edge id="12153" label="Q9R1V7 (pp) P04925" source="8757" target="8354" cy:directed="1"/>
      <edge id="12152" label="Q9D6K5 (pp) Q8CHC4" source="8755" target="8608" cy:directed="1"/>
      <edge id="12151" label="Q9CYT6 (pp) P40124" source="8753" target="8681" cy:directed="1"/>
      <edge id="12150" label="Q04447 (pp) P63017" source="8750" target="8389" cy:directed="1"/>
      <edge id="12149" label="Q9Z2W9 (pp) P23819" source="8749" target="8188" cy:directed="1"/>
      <edge id="12148" label="Q63810 (pp) P48453" source="8748" target="8559" cy:directed="1"/>
      <edge id="12147" label="Q61330 (pp) B9EKR1" source="8747" target="8578" cy:directed="1"/>
      <edge id="12146" label="Q8K0T0 (pp) P50516" source="8745" target="8262" cy:directed="1"/>
      <edge id="12145" label="Q8K0T0 (pp) Q01097" source="8745" target="8173" cy:directed="1"/>
      <edge id="12144" label="Q9ERD7 (pp) P47757" source="8741" target="8195" cy:directed="1"/>
      <edge id="12143" label="Q921J2 (pp) P63101" source="8740" target="8448" cy:directed="1"/>
      <edge id="12142" label="Q9CQW1 (pp) P46460" source="8739" target="8252" cy:directed="1"/>
      <edge id="12141" label="Q6P9K9 (pp) Q8BYM5" source="8738" target="8561" cy:directed="1"/>
      <edge id="12140" label="Q6P9K9 (pp) O70589" source="8738" target="8533" cy:directed="1"/>
      <edge id="12139" label="Q9CZW5 (pp) P63038" source="8737" target="8216" cy:directed="1"/>
      <edge id="12138" label="Q9CZW5 (pp) Q6PB66" source="8737" target="8467" cy:directed="1"/>
      <edge id="12137" label="P20152 (pp) P16054" source="8736" target="8412" cy:directed="1"/>
      <edge id="12136" label="Q8BRT1 (pp) P28740" source="8735" target="8661" cy:directed="1"/>
      <edge id="12135" label="Q921M7 (pp) P68510" source="8733" target="8182" cy:directed="1"/>
      <edge id="12134" label="Q8R366 (pp) P04925" source="8731" target="8354" cy:directed="1"/>
      <edge id="12133" label="Q61206 (pp) P63005" source="8729" target="8275" cy:directed="1"/>
      <edge id="12132" label="Q03157 (pp) P12023" source="8726" target="8294" cy:directed="1"/>
      <edge id="12131" label="Q03157 (pp) Q9Z268" source="8726" target="8486" cy:directed="1"/>
      <edge id="12130" label="Q03157 (pp) Q9QXJ1" source="8726" target="8539" cy:directed="1"/>
      <edge id="12129" label="Q03157 (pp) P04925" source="8726" target="8354" cy:directed="1"/>
      <edge id="12128" label="Q8R5C5 (pp) P50516" source="8725" target="8262" cy:directed="1"/>
      <edge id="12127" label="Q91VT4 (pp) Q8QZT1" source="8723" target="8526" cy:directed="1"/>
      <edge id="12126" label="Q91VT4 (pp) Q9CR68" source="8723" target="8236" cy:directed="1"/>
      <edge id="12125" label="Q91VT4 (pp) Q99LC5" source="8723" target="8284" cy:directed="1"/>
      <edge id="12124" label="Q3THE2 (pp) Q01097" source="8721" target="8173" cy:directed="1"/>
      <edge id="12123" label="Q3THE2 (pp) P68510" source="8721" target="8182" cy:directed="1"/>
      <edge id="12122" label="Q920P5 (pp) P63101" source="8720" target="8448" cy:directed="1"/>
      <edge id="12121" label="Q2PFD7 (pp) P63101" source="8719" target="8448" cy:directed="1"/>
      <edge id="12120" label="Q7TMM9 (pp) P60879" source="8718" target="8350" cy:directed="1"/>
      <edge id="12119" label="Q7TMM9 (pp) P63101" source="8718" target="8448" cy:directed="1"/>
      <edge id="12118" label="Q91VR7 (pp) P14873" source="8716" target="8442" cy:directed="1"/>
      <edge id="12117" label="Q9CR62 (pp) Q9DC69" source="8715" target="8376" cy:directed="1"/>
      <edge id="12116" label="Q9CR62 (pp) Q9CZ13" source="8715" target="8218" cy:directed="1"/>
      <edge id="12115" label="Q8CHH9 (pp) P50516" source="8714" target="8262" cy:directed="1"/>
      <edge id="12114" label="P97300 (pp) Q99P72" source="8713" target="8647" cy:directed="1"/>
      <edge id="12113" label="O08917 (pp) Q60634" source="8711" target="8712" cy:directed="1"/>
      <edge id="12112" label="Q61316 (pp) Q60864" source="8710" target="8343" cy:directed="1"/>
      <edge id="12111" label="Q9D1T0 (pp) P12023" source="8709" target="8294" cy:directed="1"/>
      <edge id="12110" label="P11798 (pp) P35438" source="8707" target="8184" cy:directed="1"/>
      <edge id="12109" label="P11798 (pp) P63101" source="8707" target="8448" cy:directed="1"/>
      <edge id="12108" label="P11798 (pp) Q01097" source="8707" target="8173" cy:directed="1"/>
      <edge id="12107" label="P11798 (pp) P35436" source="8707" target="8189" cy:directed="1"/>
      <edge id="12106" label="P11798 (pp) P28652" source="8707" target="8545" cy:directed="1"/>
      <edge id="12105" label="P11798 (pp) O88935" source="8707" target="8400" cy:directed="1"/>
      <edge id="12104" label="P11798 (pp) Q9WU78" source="8707" target="8615" cy:directed="1"/>
      <edge id="12103" label="Q8K183 (pp) P63330" source="8706" target="8198" cy:directed="1"/>
      <edge id="12102" label="Q99NE5 (pp) Q9EQZ6" source="8705" target="8776" cy:directed="1"/>
      <edge id="12101" label="P57780 (pp) P09103" source="8703" target="8443" cy:directed="1"/>
      <edge id="12100" label="P57780 (pp) P50516" source="8703" target="8262" cy:directed="1"/>
      <edge id="12099" label="Q9QY76 (pp) O35526" source="8702" target="8298" cy:directed="1"/>
      <edge id="12098" label="Q9QY76 (pp) O08788" source="8702" target="8306" cy:directed="1"/>
      <edge id="12097" label="Q9QY76 (pp) P61264" source="8702" target="8436" cy:directed="1"/>
      <edge id="12096" label="Q9R1V6 (pp) Q9JIA1" source="8700" target="8764" cy:directed="1"/>
      <edge id="12095" label="Q9R1V6 (pp) Q01097" source="8700" target="8173" cy:directed="1"/>
      <edge id="12094" label="P48758 (pp) P62259" source="8699" target="8194" cy:directed="1"/>
      <edge id="12093" label="Q91XV3 (pp) P06837" source="8698" target="8476" cy:directed="1"/>
      <edge id="12092" label="Q91XV3 (pp) P60761" source="8698" target="8568" cy:directed="1"/>
      <edge id="12091" label="Q91XV3 (pp) P26645" source="8698" target="8674" cy:directed="1"/>
      <edge id="12090" label="Q91XV3 (pp) P68510" source="8698" target="8182" cy:directed="1"/>
      <edge id="12089" label="P55302 (pp) Q91ZX7" source="8697" target="8492" cy:directed="1"/>
      <edge id="12088" label="O88643 (pp) P60766" source="8695" target="8496" cy:directed="1"/>
      <edge id="12087" label="O88643 (pp) Q68FF6" source="8695" target="8552" cy:directed="1"/>
      <edge id="12086" label="O88643 (pp) Q61735" source="8695" target="8336" cy:directed="1"/>
      <edge id="12085" label="O88643 (pp) P63001" source="8695" target="8367" cy:directed="1"/>
      <edge id="12084" label="Q80TZ3 (pp) P50516" source="8694" target="8262" cy:directed="1"/>
      <edge id="12083" label="Q80TZ3 (pp) O08585" source="8694" target="8576" cy:directed="1"/>
      <edge id="12082" label="Q7TMB8 (pp) Q9JJV2" source="8693" target="8377" cy:directed="1"/>
      <edge id="12081" label="Q7TMB8 (pp) P28660" source="8693" target="8351" cy:directed="1"/>
      <edge id="12080" label="Q9WV55 (pp) Q62442" source="8692" target="8302" cy:directed="1"/>
      <edge id="12079" label="Q9WV55 (pp) Q9QY76" source="8692" target="8702" cy:directed="1"/>
      <edge id="12078" label="Q9WV55 (pp) P60879" source="8692" target="8350" cy:directed="1"/>
      <edge id="12077" label="Q9WV55 (pp) P63044" source="8692" target="8369" cy:directed="1"/>
      <edge id="12076" label="O55131 (pp) P42208" source="8691" target="8676" cy:directed="1"/>
      <edge id="12075" label="O35136 (pp) P11627" source="8690" target="8530" cy:directed="1"/>
      <edge id="12074" label="P12960 (pp) P04925" source="8688" target="8354" cy:directed="1"/>
      <edge id="12073" label="P12960 (pp) P11627" source="8688" target="8530" cy:directed="1"/>
      <edge id="12072" label="P12960 (pp) B9EKR1" source="8688" target="8578" cy:directed="1"/>
      <edge id="12071" label="Q61699 (pp) P68369" source="8687" target="8317" cy:directed="1"/>
      <edge id="12070" label="P08553 (pp) P46660" source="8686" target="8370" cy:directed="1"/>
      <edge id="12069" label="P08553 (pp) P19246" source="8686" target="8627" cy:directed="1"/>
      <edge id="12068" label="Q8K4Z3 (pp) Q9CZ42" source="8685" target="8657" cy:directed="1"/>
      <edge id="12067" label="Q8K4Z3 (pp) Q9Z1P6" source="8685" target="8268" cy:directed="1"/>
      <edge id="12066" label="P08551 (pp) P19246" source="8684" target="8627" cy:directed="1"/>
      <edge id="12065" label="P08551 (pp) P63101" source="8684" target="8448" cy:directed="1"/>
      <edge id="12064" label="Q8VDQ8 (pp) Q9DC69" source="8683" target="8376" cy:directed="1"/>
      <edge id="12063" label="O54983 (pp) Q8VDQ8" source="8682" target="8683" cy:directed="1"/>
      <edge id="12062" label="P18760 (pp) P40124" source="8680" target="8681" cy:directed="1"/>
      <edge id="12061" label="Q9Z2Q6 (pp) O55131" source="8678" target="8691" cy:directed="1"/>
      <edge id="12060" label="Q9Z2Q6 (pp) P42208" source="8678" target="8676" cy:directed="1"/>
      <edge id="12059" label="Q9WV34 (pp) Q01097" source="8677" target="8173" cy:directed="1"/>
      <edge id="12058" label="P28661 (pp) P42208" source="8675" target="8676" cy:directed="1"/>
      <edge id="12057" label="P26645 (pp) P63318" source="8674" target="8635" cy:directed="1"/>
      <edge id="12056" label="P84096 (pp) Q5FWK3" source="8673" target="8459" cy:directed="1"/>
      <edge id="12055" label="O35143 (pp) Q91VR2" source="8672" target="8232" cy:directed="1"/>
      <edge id="12054" label="O35143 (pp) Q9D3D9" source="8672" target="8179" cy:directed="1"/>
      <edge id="12053" label="P63321 (pp) P35438" source="8670" target="8184" cy:directed="1"/>
      <edge id="12052" label="Q8K021 (pp) Q62277" source="8669" target="8323" cy:directed="1"/>
      <edge id="12051" label="Q8CI94 (pp) Q9D0F9" source="8668" target="8604" cy:directed="1"/>
      <edge id="12050" label="Q8CI94 (pp) Q91ZJ5" source="8668" target="8583" cy:directed="1"/>
      <edge id="12049" label="Q8CI94 (pp) P50516" source="8668" target="8262" cy:directed="1"/>
      <edge id="12048" label="P48962 (pp) Q60931" source="8667" target="8525" cy:directed="1"/>
      <edge id="12047" label="P43406 (pp) Q71LX4" source="8665" target="8666" cy:directed="1"/>
      <edge id="12046" label="O35857 (pp) P17156" source="8663" target="8547" cy:directed="1"/>
      <edge id="12045" label="O35857 (pp) P62073" source="8663" target="8324" cy:directed="1"/>
      <edge id="12044" label="O35857 (pp) O35129" source="8663" target="8380" cy:directed="1"/>
      <edge id="12043" label="O35857 (pp) P38647" source="8663" target="8515" cy:directed="1"/>
      <edge id="12042" label="O35857 (pp) Q9D880" source="8663" target="8664" cy:directed="1"/>
      <edge id="12041" label="Q61490 (pp) P01831" source="8658" target="8588" cy:directed="1"/>
      <edge id="12040" label="Q9CZ42 (pp) P61922" source="8657" target="8293" cy:directed="1"/>
      <edge id="12039" label="P35564 (pp) P09103" source="8656" target="8443" cy:directed="1"/>
      <edge id="12038" label="P19096 (pp) Q9DCD0" source="8655" target="8191" cy:directed="1"/>
      <edge id="12037" label="P19096 (pp) Q64521" source="8655" target="8394" cy:directed="1"/>
      <edge id="12036" label="P19096 (pp) Q05920" source="8655" target="8223" cy:directed="1"/>
      <edge id="12035" label="Q61644 (pp) P39053" source="8654" target="8466" cy:directed="1"/>
      <edge id="12034" label="Q61644 (pp) Q8CHC4" source="8654" target="8608" cy:directed="1"/>
      <edge id="12033" label="Q61644 (pp) P10637" source="8654" target="8503" cy:directed="1"/>
      <edge id="12032" label="Q8BZ98 (pp) Q60631" source="8653" target="8322" cy:directed="1"/>
      <edge id="12031" label="Q8BZ98 (pp) Q60598" source="8653" target="8517" cy:directed="1"/>
      <edge id="12030" label="Q8BZ98 (pp) Q61644" source="8653" target="8654" cy:directed="1"/>
      <edge id="12029" label="Q5RJI5 (pp) P62259" source="8652" target="8194" cy:directed="1"/>
      <edge id="12028" label="P61164 (pp) P62259" source="8650" target="8194" cy:directed="1"/>
      <edge id="12027" label="Q8R191 (pp) Q62277" source="8649" target="8323" cy:directed="1"/>
      <edge id="12026" label="Q8R191 (pp) P50516" source="8649" target="8262" cy:directed="1"/>
      <edge id="12025" label="O35643 (pp) O08585" source="8648" target="8576" cy:directed="1"/>
      <edge id="12024" label="O35643 (pp) Q80TZ3" source="8648" target="8694" cy:directed="1"/>
      <edge id="12023" label="O35643 (pp) Q60631" source="8648" target="8322" cy:directed="1"/>
      <edge id="12022" label="Q99P72 (pp) Q9D1T0" source="8647" target="8709" cy:directed="1"/>
      <edge id="12021" label="Q99P72 (pp) P48722" source="8647" target="8671" cy:directed="1"/>
      <edge id="12020" label="Q60930 (pp) P48962" source="8646" target="8667" cy:directed="1"/>
      <edge id="12019" label="Q60930 (pp) Q9WUM5" source="8646" target="8245" cy:directed="1"/>
      <edge id="12018" label="Q60930 (pp) Q01097" source="8646" target="8173" cy:directed="1"/>
      <edge id="12017" label="Q60930 (pp) Q9CR68" source="8646" target="8236" cy:directed="1"/>
      <edge id="12016" label="P20444 (pp) P26645" source="8645" target="8674" cy:directed="1"/>
      <edge id="12015" label="Q9QXS1 (pp) P63101" source="8644" target="8448" cy:directed="1"/>
      <edge id="12014" label="Q9QXS1 (pp) Q64010" source="8644" target="8398" cy:directed="1"/>
      <edge id="12013" label="O08599 (pp) P16546" source="8643" target="8197" cy:directed="1"/>
      <edge id="12012" label="O08599 (pp) P61264" source="8643" target="8436" cy:directed="1"/>
      <edge id="12011" label="Q8BW75 (pp) Q9CZS1" source="8642" target="8381" cy:directed="1"/>
      <edge id="12010" label="Q8BW75 (pp) Q9DBF1" source="8642" target="8451" cy:directed="1"/>
      <edge id="12009" label="O35239 (pp) P46460" source="8641" target="8252" cy:directed="1"/>
      <edge id="12008" label="Q9EPJ9 (pp) P62331" source="8639" target="8287" cy:directed="1"/>
      <edge id="12007" label="P00405 (pp) Q6PB66" source="8638" target="8467" cy:directed="1"/>
      <edge id="12006" label="P00405 (pp) P03930" source="8638" target="8357" cy:directed="1"/>
      <edge id="12005" label="P56564 (pp) P28661" source="8637" target="8675" cy:directed="1"/>
      <edge id="12004" label="P56564 (pp) P63101" source="8637" target="8448" cy:directed="1"/>
      <edge id="12003" label="P63318 (pp) P35438" source="8635" target="8184" cy:directed="1"/>
      <edge id="12002" label="P58281 (pp) Q8K1M6" source="8633" target="8419" cy:directed="1"/>
      <edge id="12001" label="Q8R3V5 (pp) Q8CHC4" source="8632" target="8608" cy:directed="1"/>
      <edge id="12000" label="P67871 (pp) Q60737" source="8631" target="8773" cy:directed="1"/>
      <edge id="11999" label="Q810U3 (pp) Q8C8R3" source="8630" target="8196" cy:directed="1"/>
      <edge id="11998" label="P62743 (pp) O08585" source="8626" target="8576" cy:directed="1"/>
      <edge id="11997" label="Q60605 (pp) Q01097" source="8624" target="8173" cy:directed="1"/>
      <edge id="11996" label="P35279 (pp) Q61598" source="8620" target="8226" cy:directed="1"/>
      <edge id="11995" label="Q9CRB9 (pp) P16054" source="8619" target="8412" cy:directed="1"/>
      <edge id="11994" label="Q9CQI6 (pp) P60710" source="8618" target="8311" cy:directed="1"/>
      <edge id="11993" label="P50396 (pp) P63011" source="8616" target="8516" cy:directed="1"/>
      <edge id="11992" label="P50396 (pp) Q99PT1" source="8616" target="8402" cy:directed="1"/>
      <edge id="11991" label="P50396 (pp) P07901" source="8616" target="8477" cy:directed="1"/>
      <edge id="11990" label="P50396 (pp) P62821" source="8616" target="8617" cy:directed="1"/>
      <edge id="11989" label="Q9WU78 (pp) Q62419" source="8615" target="8581" cy:directed="1"/>
      <edge id="11988" label="Q9WU78 (pp) Q60631" source="8615" target="8322" cy:directed="1"/>
      <edge id="11987" label="Q9WU78 (pp) P05480" source="8615" target="8313" cy:directed="1"/>
      <edge id="11986" label="Q9WU78 (pp) Q62420" source="8615" target="8440" cy:directed="1"/>
      <edge id="11985" label="P0C0A3 (pp) Q9D8B3" source="8614" target="8587" cy:directed="1"/>
      <edge id="11984" label="P0C0A3 (pp) Q9WU78" source="8614" target="8615" cy:directed="1"/>
      <edge id="11983" label="Q9R0P9 (pp) O55042" source="8613" target="8585" cy:directed="1"/>
      <edge id="11982" label="Q9R0P9 (pp) Q99LX0" source="8613" target="8286" cy:directed="1"/>
      <edge id="11981" label="Q9R0P9 (pp) P68369" source="8613" target="8317" cy:directed="1"/>
      <edge id="11980" label="Q80UU9 (pp) P68510" source="8612" target="8182" cy:directed="1"/>
      <edge id="11979" label="Q60875 (pp) P84096" source="8610" target="8673" cy:directed="1"/>
      <edge id="11978" label="Q60875 (pp) Q8BG51" source="8610" target="8366" cy:directed="1"/>
      <edge id="11977" label="Q61411 (pp) P63038" source="8609" target="8216" cy:directed="1"/>
      <edge id="11976" label="Q61411 (pp) P35438" source="8609" target="8184" cy:directed="1"/>
      <edge id="11975" label="Q8CHC4 (pp) P50516" source="8608" target="8262" cy:directed="1"/>
      <edge id="11974" label="Q8CHC4 (pp) Q62420" source="8608" target="8440" cy:directed="1"/>
      <edge id="11973" label="Q91VZ6 (pp) Q68FD5" source="8607" target="8345" cy:directed="1"/>
      <edge id="11972" label="Q9WUB3 (pp) P47857" source="8606" target="8500" cy:directed="1"/>
      <edge id="11971" label="Q9WUB3 (pp) Q9D0F9" source="8606" target="8604" cy:directed="1"/>
      <edge id="11970" label="Q9WUB3 (pp) Q91ZJ5" source="8606" target="8583" cy:directed="1"/>
      <edge id="11969" label="Q9D0F9 (pp) Q91ZJ5" source="8604" target="8583" cy:directed="1"/>
      <edge id="11968" label="Q9D0F9 (pp) P17710" source="8604" target="8291" cy:directed="1"/>
      <edge id="11967" label="Q6PIC6 (pp) P04925" source="8602" target="8354" cy:directed="1"/>
      <edge id="11966" label="Q6PIC6 (pp) Q01097" source="8602" target="8173" cy:directed="1"/>
      <edge id="11965" label="Q80VP1 (pp) Q9Z0R4" source="8601" target="8570" cy:directed="1"/>
      <edge id="11964" label="P68181 (pp) P63101" source="8600" target="8448" cy:directed="1"/>
      <edge id="11963" label="P68181 (pp) P35438" source="8600" target="8184" cy:directed="1"/>
      <edge id="11962" label="P68181 (pp) P12367" source="8600" target="8386" cy:directed="1"/>
      <edge id="11961" label="P28663 (pp) P46460" source="8599" target="8252" cy:directed="1"/>
      <edge id="11960" label="P41216 (pp) Q99JY0" source="8597" target="8353" cy:directed="1"/>
      <edge id="11959" label="Q9D6F9 (pp) P50516" source="8596" target="8262" cy:directed="1"/>
      <edge id="11958" label="Q99MR8 (pp) Q99MN9" source="8594" target="8403" cy:directed="1"/>
      <edge id="11957" label="Q8BH04 (pp) P17182" source="8593" target="8484" cy:directed="1"/>
      <edge id="11956" label="Q8BH04 (pp) Q05920" source="8593" target="8223" cy:directed="1"/>
      <edge id="11955" label="Q8BWF0 (pp) Q05920" source="8592" target="8223" cy:directed="1"/>
      <edge id="11954" label="Q8BWF0 (pp) P61922" source="8592" target="8293" cy:directed="1"/>
      <edge id="11953" label="Q8BWF0 (pp) P70404" source="8592" target="8263" cy:directed="1"/>
      <edge id="11952" label="Q8BWF0 (pp) Q60597" source="8592" target="8480" cy:directed="1"/>
      <edge id="11951" label="Q91WC3 (pp) P50516" source="8591" target="8262" cy:directed="1"/>
      <edge id="11950" label="Q3UVX5 (pp) P35438" source="8590" target="8184" cy:directed="1"/>
      <edge id="11949" label="Q3UVX5 (pp) P62204" source="8590" target="8548" cy:directed="1"/>
      <edge id="11948" label="Q3UVX5 (pp) P04925" source="8590" target="8354" cy:directed="1"/>
      <edge id="11947" label="P20357 (pp) P14873" source="8589" target="8442" cy:directed="1"/>
      <edge id="11946" label="P20357 (pp) P12367" source="8589" target="8386" cy:directed="1"/>
      <edge id="11945" label="P20357 (pp) O88935" source="8589" target="8400" cy:directed="1"/>
      <edge id="11944" label="P20357 (pp) Q9ERD7" source="8589" target="8741" cy:directed="1"/>
      <edge id="11943" label="P20357 (pp) P11798" source="8589" target="8707" cy:directed="1"/>
      <edge id="11942" label="P20357 (pp) Q6PHZ2" source="8589" target="8310" cy:directed="1"/>
      <edge id="11941" label="P20357 (pp) P35438" source="8589" target="8184" cy:directed="1"/>
      <edge id="11940" label="Q9D8B3 (pp) Q9WU78" source="8587" target="8615" cy:directed="1"/>
      <edge id="11939" label="O55042 (pp) O35526" source="8585" target="8298" cy:directed="1"/>
      <edge id="11938" label="P63328 (pp) P63137" source="8584" target="8269" cy:directed="1"/>
      <edge id="11937" label="P63328 (pp) Q63810" source="8584" target="8748" cy:directed="1"/>
      <edge id="11936" label="P63328 (pp) O35465" source="8584" target="8415" cy:directed="1"/>
      <edge id="11935" label="P63328 (pp) P35438" source="8584" target="8184" cy:directed="1"/>
      <edge id="11934" label="P63328 (pp) P22723" source="8584" target="8625" cy:directed="1"/>
      <edge id="11933" label="Q62419 (pp) Q9D8B3" source="8581" target="8587" cy:directed="1"/>
      <edge id="11932" label="Q62419 (pp) P39053" source="8581" target="8466" cy:directed="1"/>
      <edge id="11931" label="Q62419 (pp) Q7TQF7" source="8581" target="8474" cy:directed="1"/>
      <edge id="11930" label="P45376 (pp) P16054" source="8580" target="8412" cy:directed="1"/>
      <edge id="11929" label="O54991 (pp) Q99P72" source="8579" target="8647" cy:directed="1"/>
      <edge id="11928" label="B9EKR1 (pp) O54991" source="8578" target="8579" cy:directed="1"/>
      <edge id="11927" label="Q9QYR6 (pp) Q91VR7" source="8577" target="8716" cy:directed="1"/>
      <edge id="11926" label="O08585 (pp) Q80VP1" source="8576" target="8601" cy:directed="1"/>
      <edge id="11925" label="O08585 (pp) Q91VR2" source="8576" target="8232" cy:directed="1"/>
      <edge id="11924" label="Q60932 (pp) P48962" source="8575" target="8667" cy:directed="1"/>
      <edge id="11923" label="Q60932 (pp) Q01097" source="8575" target="8173" cy:directed="1"/>
      <edge id="11922" label="Q60932 (pp) P16054" source="8575" target="8412" cy:directed="1"/>
      <edge id="11921" label="Q60932 (pp) P17710" source="8575" target="8291" cy:directed="1"/>
      <edge id="11920" label="Q60932 (pp) Q99LX0" source="8575" target="8286" cy:directed="1"/>
      <edge id="11919" label="Q3UHL1 (pp) P60761" source="8574" target="8568" cy:directed="1"/>
      <edge id="11918" label="Q3UHL1 (pp) P63101" source="8574" target="8448" cy:directed="1"/>
      <edge id="11917" label="Q9CPQ1 (pp) P56391" source="8573" target="8300" cy:directed="1"/>
      <edge id="11916" label="Q9CPQ1 (pp) P00405" source="8573" target="8638" cy:directed="1"/>
      <edge id="11915" label="Q9CPQ1 (pp) Q9D855" source="8573" target="8372" cy:directed="1"/>
      <edge id="11914" label="Q9CPQ1 (pp) Q9DB20" source="8573" target="8208" cy:directed="1"/>
      <edge id="11913" label="Q9CPQ1 (pp) Q9CQZ5" source="8573" target="8175" cy:directed="1"/>
      <edge id="11912" label="Q9CPQ1 (pp) P43024" source="8573" target="8441" cy:directed="1"/>
      <edge id="11911" label="Q9CPQ1 (pp) P56379" source="8573" target="8384" cy:directed="1"/>
      <edge id="11910" label="Q9CPQ1 (pp) Q9CQH3" source="8573" target="8209" cy:directed="1"/>
      <edge id="11909" label="Q9CPQ1 (pp) Q9CQQ7" source="8573" target="8378" cy:directed="1"/>
      <edge id="11908" label="Q9CPQ1 (pp) Q9CQZ6" source="8573" target="8200" cy:directed="1"/>
      <edge id="11907" label="Q9CPQ1 (pp) Q9D3D9" source="8573" target="8179" cy:directed="1"/>
      <edge id="11906" label="Q9CPQ1 (pp) Q99LY9" source="8573" target="8221" cy:directed="1"/>
      <edge id="11905" label="Q9CPQ1 (pp) P97450" source="8573" target="8399" cy:directed="1"/>
      <edge id="11904" label="Q9CPQ1 (pp) Q9CQJ8" source="8573" target="8239" cy:directed="1"/>
      <edge id="11903" label="Q9CPQ1 (pp) Q9DB77" source="8573" target="8374" cy:directed="1"/>
      <edge id="11902" label="Q9CPQ1 (pp) P17665" source="8573" target="8524" cy:directed="1"/>
      <edge id="11901" label="Q9CPQ1 (pp) P48771" source="8573" target="8272" cy:directed="1"/>
      <edge id="11900" label="Q9CPQ1 (pp) Q9CPP6" source="8573" target="8250" cy:directed="1"/>
      <edge id="11899" label="Q9CPQ1 (pp) Q9CQ69" source="8573" target="8203" cy:directed="1"/>
      <edge id="11898" label="Q9CPQ1 (pp) Q9DCX2" source="8573" target="8335" cy:directed="1"/>
      <edge id="11897" label="Q9CPQ1 (pp) Q9D6J6" source="8573" target="8176" cy:directed="1"/>
      <edge id="11896" label="Q9CPQ1 (pp) Q03265" source="8573" target="8181" cy:directed="1"/>
      <edge id="11895" label="Q9CPQ1 (pp) P19783" source="8573" target="8214" cy:directed="1"/>
      <edge id="11894" label="Q9CPQ1 (pp) Q06185" source="8573" target="8240" cy:directed="1"/>
      <edge id="11893" label="Q9CPQ1 (pp) Q91VR2" source="8573" target="8232" cy:directed="1"/>
      <edge id="11892" label="Q9CPQ1 (pp) Q9ERS2" source="8573" target="8308" cy:directed="1"/>
      <edge id="11891" label="Q5SQX6 (pp) P28660" source="8572" target="8351" cy:directed="1"/>
      <edge id="11890" label="Q80Y14 (pp) Q99KI0" source="8571" target="8307" cy:directed="1"/>
      <edge id="11889" label="Q80Y14 (pp) Q99KB8" source="8571" target="8754" cy:directed="1"/>
      <edge id="11888" label="Q80Y14 (pp) Q9DCB8" source="8571" target="8511" cy:directed="1"/>
      <edge id="11887" label="Q80Y14 (pp) P99029" source="8571" target="8325" cy:directed="1"/>
      <edge id="11886" label="Q9Z0R4 (pp) P50516" source="8570" target="8262" cy:directed="1"/>
      <edge id="11885" label="Q9Z0R4 (pp) P39053" source="8570" target="8466" cy:directed="1"/>
      <edge id="11884" label="P00493 (pp) P04925" source="8569" target="8354" cy:directed="1"/>
      <edge id="11883" label="P00493 (pp) Q9R0Y5" source="8569" target="8541" cy:directed="1"/>
      <edge id="11882" label="P00493 (pp) P06151" source="8569" target="8207" cy:directed="1"/>
      <edge id="11881" label="P00493 (pp) P17742" source="8569" target="8228" cy:directed="1"/>
      <edge id="11880" label="P00493 (pp) P52480" source="8569" target="8424" cy:directed="1"/>
      <edge id="11879" label="P00493 (pp) Q9R111" source="8569" target="8603" cy:directed="1"/>
      <edge id="11878" label="P00493 (pp) Q99LC5" source="8569" target="8284" cy:directed="1"/>
      <edge id="11877" label="P60761 (pp) P06837" source="8568" target="8476" cy:directed="1"/>
      <edge id="11876" label="Q64332 (pp) P46460" source="8567" target="8252" cy:directed="1"/>
      <edge id="11875" label="Q64332 (pp) Q9JJV2" source="8567" target="8377" cy:directed="1"/>
      <edge id="11874" label="Q64332 (pp) P62259" source="8567" target="8194" cy:directed="1"/>
      <edge id="11873" label="Q64332 (pp) P60761" source="8567" target="8568" cy:directed="1"/>
      <edge id="11872" label="O70318 (pp) O70589" source="8566" target="8533" cy:directed="1"/>
      <edge id="11871" label="O70318 (pp) P63001" source="8566" target="8367" cy:directed="1"/>
      <edge id="11870" label="O08539 (pp) Q8BZ98" source="8565" target="8653" cy:directed="1"/>
      <edge id="11869" label="O08539 (pp) Q8R3V5" source="8565" target="8632" cy:directed="1"/>
      <edge id="11868" label="O08539 (pp) P10637" source="8565" target="8503" cy:directed="1"/>
      <edge id="11867" label="Q9CS84 (pp) O70589" source="8564" target="8533" cy:directed="1"/>
      <edge id="11866" label="Q9CS84 (pp) O88952" source="8564" target="8213" cy:directed="1"/>
      <edge id="11865" label="Q9CS84 (pp) Q8BYM5" source="8564" target="8561" cy:directed="1"/>
      <edge id="11864" label="Q9JIS5 (pp) Q68FF6" source="8562" target="8552" cy:directed="1"/>
      <edge id="11863" label="Q4ACU6 (pp) Q60631" source="8560" target="8322" cy:directed="1"/>
      <edge id="11862" label="Q4ACU6 (pp) Q8BYM5" source="8560" target="8561" cy:directed="1"/>
      <edge id="11861" label="P48453 (pp) P63328" source="8559" target="8584" cy:directed="1"/>
      <edge id="11860" label="P48453 (pp) P62204" source="8559" target="8548" cy:directed="1"/>
      <edge id="11859" label="P48453 (pp) P63101" source="8559" target="8448" cy:directed="1"/>
      <edge id="11858" label="Q925I1 (pp) O35658" source="8558" target="8333" cy:directed="1"/>
      <edge id="11857" label="Q62261 (pp) P13595" source="8557" target="8531" cy:directed="1"/>
      <edge id="11856" label="Q62261 (pp) Q810U4" source="8557" target="8760" cy:directed="1"/>
      <edge id="11855" label="Q62261 (pp) P16546" source="8557" target="8197" cy:directed="1"/>
      <edge id="11854" label="Q62261 (pp) Q01097" source="8557" target="8173" cy:directed="1"/>
      <edge id="11853" label="Q62261 (pp) P35438" source="8557" target="8184" cy:directed="1"/>
      <edge id="11852" label="Q62261 (pp) P63101" source="8557" target="8448" cy:directed="1"/>
      <edge id="11851" label="Q9R0N7 (pp) Q9Z0P4" source="8556" target="8751" cy:directed="1"/>
      <edge id="11850" label="Q9R0N7 (pp) P60879" source="8556" target="8350" cy:directed="1"/>
      <edge id="11849" label="P30999 (pp) Q60598" source="8553" target="8517" cy:directed="1"/>
      <edge id="11848" label="P30999 (pp) P35438" source="8553" target="8184" cy:directed="1"/>
      <edge id="11847" label="P30999 (pp) Q02248" source="8553" target="8312" cy:directed="1"/>
      <edge id="11846" label="Q68FF6 (pp) P62204" source="8552" target="8548" cy:directed="1"/>
      <edge id="11845" label="Q68FF6 (pp) B9EKR1" source="8552" target="8578" cy:directed="1"/>
      <edge id="11844" label="Q68FF6 (pp) P63101" source="8552" target="8448" cy:directed="1"/>
      <edge id="11843" label="P23818 (pp) P23819" source="8551" target="8188" cy:directed="1"/>
      <edge id="11842" label="P23818 (pp) Q3UVX5" source="8551" target="8590" cy:directed="1"/>
      <edge id="11841" label="P23818 (pp) P35438" source="8551" target="8184" cy:directed="1"/>
      <edge id="11840" label="P23818 (pp) P35436" source="8551" target="8189" cy:directed="1"/>
      <edge id="11839" label="Q9DBJ1 (pp) P52480" source="8550" target="8424" cy:directed="1"/>
      <edge id="11838" label="Q9DBJ1 (pp) P17182" source="8550" target="8484" cy:directed="1"/>
      <edge id="11837" label="Q9DBJ1 (pp) P17751" source="8550" target="8266" cy:directed="1"/>
      <edge id="11836" label="Q9DBJ1 (pp) Q99K85" source="8550" target="8546" cy:directed="1"/>
      <edge id="11835" label="Q9DBJ1 (pp) P06745" source="8550" target="8433" cy:directed="1"/>
      <edge id="11834" label="Q9DBJ1 (pp) P09411" source="8550" target="8267" cy:directed="1"/>
      <edge id="11833" label="Q9DBJ1 (pp) Q93092" source="8550" target="8423" cy:directed="1"/>
      <edge id="11832" label="P68254 (pp) P10637" source="8549" target="8503" cy:directed="1"/>
      <edge id="11831" label="P62204 (pp) P63101" source="8548" target="8448" cy:directed="1"/>
      <edge id="11830" label="P62204 (pp) O70589" source="8548" target="8533" cy:directed="1"/>
      <edge id="11829" label="P62204 (pp) P63328" source="8548" target="8584" cy:directed="1"/>
      <edge id="11828" label="P62204 (pp) P35438" source="8548" target="8184" cy:directed="1"/>
      <edge id="11827" label="Q99K85 (pp) O88712" source="8546" target="8510" cy:directed="1"/>
      <edge id="11826" label="Q99K85 (pp) Q91Z53" source="8546" target="8304" cy:directed="1"/>
      <edge id="11825" label="P28652 (pp) Q01097" source="8545" target="8173" cy:directed="1"/>
      <edge id="11824" label="P28652 (pp) Q6PHZ2" source="8545" target="8310" cy:directed="1"/>
      <edge id="11823" label="P28652 (pp) P35436" source="8545" target="8189" cy:directed="1"/>
      <edge id="11822" label="P28652 (pp) P23819" source="8545" target="8188" cy:directed="1"/>
      <edge id="11821" label="Q6PIE5 (pp) P70414" source="8543" target="8544" cy:directed="1"/>
      <edge id="11820" label="P47802 (pp) O88441" source="8542" target="8264" cy:directed="1"/>
      <edge id="11819" label="Q9R0Y5 (pp) Q9DCD0" source="8541" target="8191" cy:directed="1"/>
      <edge id="11818" label="Q9QXJ1 (pp) P12023" source="8539" target="8294" cy:directed="1"/>
      <edge id="11817" label="Q9QXJ1 (pp) P04925" source="8539" target="8354" cy:directed="1"/>
      <edge id="11816" label="P84091 (pp) Q9DBG3" source="8538" target="8505" cy:directed="1"/>
      <edge id="11815" label="P84091 (pp) Q6IRU5" source="8538" target="8506" cy:directed="1"/>
      <edge id="11814" label="P84091 (pp) P62743" source="8538" target="8626" cy:directed="1"/>
      <edge id="11813" label="P84091 (pp) Q80VP1" source="8538" target="8601" cy:directed="1"/>
      <edge id="11812" label="P84091 (pp) O08585" source="8538" target="8576" cy:directed="1"/>
      <edge id="11811" label="P84091 (pp) Q68FD5" source="8538" target="8345" cy:directed="1"/>
      <edge id="11810" label="P84091 (pp) P50516" source="8538" target="8262" cy:directed="1"/>
      <edge id="11809" label="P84091 (pp) P17426" source="8538" target="8260" cy:directed="1"/>
      <edge id="11808" label="P99024 (pp) P60879" source="8536" target="8350" cy:directed="1"/>
      <edge id="11807" label="P99024 (pp) Q6PER3" source="8536" target="8276" cy:directed="1"/>
      <edge id="11806" label="P99024 (pp) O70589" source="8536" target="8533" cy:directed="1"/>
      <edge id="11805" label="P03995 (pp) P63101" source="8535" target="8448" cy:directed="1"/>
      <edge id="11804" label="P03995 (pp) Q9QXS1" source="8535" target="8644" cy:directed="1"/>
      <edge id="11803" label="O70589 (pp) O88935" source="8533" target="8400" cy:directed="1"/>
      <edge id="11802" label="O70589 (pp) O08599" source="8533" target="8643" cy:directed="1"/>
      <edge id="11801" label="O70589 (pp) P60469" source="8533" target="8582" cy:directed="1"/>
      <edge id="11800" label="O70589 (pp) P16330" source="8533" target="8534" cy:directed="1"/>
      <edge id="11799" label="Q8BKX1 (pp) P28660" source="8532" target="8351" cy:directed="1"/>
      <edge id="11798" label="Q8BKX1 (pp) P62259" source="8532" target="8194" cy:directed="1"/>
      <edge id="11797" label="P13595 (pp) P16546" source="8531" target="8197" cy:directed="1"/>
      <edge id="11796" label="P13595 (pp) P04925" source="8531" target="8354" cy:directed="1"/>
      <edge id="11795" label="P13595 (pp) Q9CQV8" source="8531" target="8326" cy:directed="1"/>
      <edge id="11794" label="P11627 (pp) P13595" source="8530" target="8531" cy:directed="1"/>
      <edge id="11793" label="P62746 (pp) P63330" source="8529" target="8198" cy:directed="1"/>
      <edge id="11792" label="P62746 (pp) Q5FWK3" source="8529" target="8459" cy:directed="1"/>
      <edge id="11791" label="P62746 (pp) Q8BG51" source="8529" target="8366" cy:directed="1"/>
      <edge id="11790" label="Q8VD37 (pp) P17426" source="8527" target="8260" cy:directed="1"/>
      <edge id="11789" label="Q8VD37 (pp) P35564" source="8527" target="8656" cy:directed="1"/>
      <edge id="11788" label="Q8VD37 (pp) Q62420" source="8527" target="8440" cy:directed="1"/>
      <edge id="11787" label="Q8QZT1 (pp) Q99LC5" source="8526" target="8284" cy:directed="1"/>
      <edge id="11786" label="Q8QZT1 (pp) Q8BMF4" source="8526" target="8222" cy:directed="1"/>
      <edge id="11785" label="Q8QZT1 (pp) Q8BWT1" source="8526" target="8280" cy:directed="1"/>
      <edge id="11784" label="Q8QZT1 (pp) Q9DBL1" source="8526" target="8420" cy:directed="1"/>
      <edge id="11783" label="Q8QZT1 (pp) Q9D0K2" source="8526" target="8246" cy:directed="1"/>
      <edge id="11782" label="Q8QZT1 (pp) O08756" source="8526" target="8352" cy:directed="1"/>
      <edge id="11781" label="Q8QZT1 (pp) Q99JY0" source="8526" target="8353" cy:directed="1"/>
      <edge id="11780" label="Q8QZT1 (pp) Q9WUM5" source="8526" target="8245" cy:directed="1"/>
      <edge id="11779" label="Q8QZT1 (pp) Q9D2G2" source="8526" target="8256" cy:directed="1"/>
      <edge id="11778" label="Q8QZT1 (pp) Q8BMS1" source="8526" target="8485" cy:directed="1"/>
      <edge id="11777" label="Q60931 (pp) Q9CQH3" source="8525" target="8209" cy:directed="1"/>
      <edge id="11776" label="Q60931 (pp) Q9D6J6" source="8525" target="8176" cy:directed="1"/>
      <edge id="11775" label="Q9JLZ3 (pp) Q99MR8" source="8523" target="8594" cy:directed="1"/>
      <edge id="11774" label="Q9JLZ3 (pp) Q8BH95" source="8523" target="8217" cy:directed="1"/>
      <edge id="11773" label="Q9JLZ3 (pp) Q9JLJ2" source="8523" target="8231" cy:directed="1"/>
      <edge id="11772" label="Q9JLZ3 (pp) Q61425" source="8523" target="8283" cy:directed="1"/>
      <edge id="11771" label="Q9JLZ3 (pp) Q3ULD5" source="8523" target="8319" cy:directed="1"/>
      <edge id="11770" label="Q8VDP6 (pp) O55023" source="8520" target="8611" cy:directed="1"/>
      <edge id="11769" label="Q8VDP6 (pp) P63082" source="8520" target="8417" cy:directed="1"/>
      <edge id="11768" label="Q8VDP6 (pp) Q9Z1B3" source="8520" target="8278" cy:directed="1"/>
      <edge id="11767" label="Q8VDP6 (pp) Q99L43" source="8520" target="8521" cy:directed="1"/>
      <edge id="11766" label="Q9Z0X1 (pp) P17742" source="8519" target="8228" cy:directed="1"/>
      <edge id="11765" label="Q9Z0X1 (pp) Q8K1M6" source="8519" target="8419" cy:directed="1"/>
      <edge id="11764" label="Q60598 (pp) Q9JM76" source="8517" target="8347" cy:directed="1"/>
      <edge id="11763" label="Q60598 (pp) Q5FWK3" source="8517" target="8459" cy:directed="1"/>
      <edge id="11762" label="Q60598 (pp) P23819" source="8517" target="8188" cy:directed="1"/>
      <edge id="11761" label="Q60598 (pp) P59999" source="8517" target="8461" cy:directed="1"/>
      <edge id="11760" label="Q60598 (pp) P63085" source="8517" target="8224" cy:directed="1"/>
      <edge id="11759" label="Q60598 (pp) Q01097" source="8517" target="8173" cy:directed="1"/>
      <edge id="11758" label="Q60598 (pp) P35438" source="8517" target="8184" cy:directed="1"/>
      <edge id="11757" label="Q60598 (pp) Q9CVB6" source="8517" target="8462" cy:directed="1"/>
      <edge id="11756" label="Q60598 (pp) Q80Z38" source="8517" target="8174" cy:directed="1"/>
      <edge id="11755" label="Q60598 (pp) P05480" source="8517" target="8313" cy:directed="1"/>
      <edge id="11754" label="Q60598 (pp) P61161" source="8517" target="8518" cy:directed="1"/>
      <edge id="11753" label="P63011 (pp) P47708" source="8516" target="8623" cy:directed="1"/>
      <edge id="11752" label="P63011 (pp) P35438" source="8516" target="8184" cy:directed="1"/>
      <edge id="11751" label="P63011 (pp) Q99NE5" source="8516" target="8705" cy:directed="1"/>
      <edge id="11750" label="P38647 (pp) Q60864" source="8515" target="8343" cy:directed="1"/>
      <edge id="11749" label="P38647 (pp) Q8JZQ2" source="8515" target="8362" cy:directed="1"/>
      <edge id="11748" label="P38647 (pp) P63038" source="8515" target="8216" cy:directed="1"/>
      <edge id="11747" label="P38647 (pp) Q9QYJ0" source="8515" target="8344" cy:directed="1"/>
      <edge id="11746" label="P38647 (pp) P63101" source="8515" target="8448" cy:directed="1"/>
      <edge id="11745" label="Q62425 (pp) Q9CQH3" source="8514" target="8209" cy:directed="1"/>
      <edge id="11744" label="Q62425 (pp) Q99LX0" source="8514" target="8286" cy:directed="1"/>
      <edge id="11743" label="Q62425 (pp) Q9CQ69" source="8514" target="8203" cy:directed="1"/>
      <edge id="11742" label="Q62425 (pp) P68510" source="8514" target="8182" cy:directed="1"/>
      <edge id="11741" label="Q62425 (pp) Q3UIU2" source="8514" target="8257" cy:directed="1"/>
      <edge id="11740" label="Q62425 (pp) P16054" source="8514" target="8412" cy:directed="1"/>
      <edge id="11739" label="Q62425 (pp) O09111" source="8514" target="8180" cy:directed="1"/>
      <edge id="11738" label="Q62425 (pp) Q9Z1P6" source="8514" target="8268" cy:directed="1"/>
      <edge id="11737" label="Q62425 (pp) Q9DCJ5" source="8514" target="8349" cy:directed="1"/>
      <edge id="11736" label="Q62425 (pp) Q9CQ54" source="8514" target="8201" cy:directed="1"/>
      <edge id="11735" label="Q62425 (pp) Q9DCS9" source="8514" target="8235" cy:directed="1"/>
      <edge id="11734" label="Q8BMF3 (pp) Q05920" source="8513" target="8223" cy:directed="1"/>
      <edge id="11733" label="Q8BMF3 (pp) P52480" source="8513" target="8424" cy:directed="1"/>
      <edge id="11732" label="Q8BMF3 (pp) P06151" source="8513" target="8207" cy:directed="1"/>
      <edge id="11731" label="Q9DCB8 (pp) Q9D6J6" source="8511" target="8176" cy:directed="1"/>
      <edge id="11730" label="Q9DCB8 (pp) Q99KI0" source="8511" target="8307" cy:directed="1"/>
      <edge id="11729" label="Q9DCB8 (pp) Q9Z1J3" source="8511" target="8512" cy:directed="1"/>
      <edge id="11728" label="O88712 (pp) Q62420" source="8510" target="8440" cy:directed="1"/>
      <edge id="11727" label="Q8BHL5 (pp) Q60631" source="8509" target="8322" cy:directed="1"/>
      <edge id="11726" label="Q9QXS6 (pp) P62259" source="8508" target="8194" cy:directed="1"/>
      <edge id="11725" label="P17183 (pp) P06745" source="8507" target="8433" cy:directed="1"/>
      <edge id="11724" label="P17183 (pp) P56480" source="8507" target="8227" cy:directed="1"/>
      <edge id="11723" label="P17183 (pp) Q93092" source="8507" target="8423" cy:directed="1"/>
      <edge id="11722" label="P17183 (pp) P52480" source="8507" target="8424" cy:directed="1"/>
      <edge id="11721" label="P17183 (pp) P09411" source="8507" target="8267" cy:directed="1"/>
      <edge id="11720" label="P17183 (pp) Q8BH04" source="8507" target="8593" cy:directed="1"/>
      <edge id="11719" label="P17183 (pp) P17751" source="8507" target="8266" cy:directed="1"/>
      <edge id="11718" label="P17183 (pp) P05063" source="8507" target="8481" cy:directed="1"/>
      <edge id="11717" label="P17183 (pp) Q9DBJ1" source="8507" target="8550" cy:directed="1"/>
      <edge id="11716" label="P17183 (pp) P05064" source="8507" target="8290" cy:directed="1"/>
      <edge id="11715" label="P17183 (pp) P40142" source="8507" target="8328" cy:directed="1"/>
      <edge id="11714" label="Q6IRU5 (pp) Q61548" source="8506" target="8387" cy:directed="1"/>
      <edge id="11713" label="Q6IRU5 (pp) P17426" source="8506" target="8260" cy:directed="1"/>
      <edge id="11712" label="Q6IRU5 (pp) P62743" source="8506" target="8626" cy:directed="1"/>
      <edge id="11711" label="Q9DBG3 (pp) Q80VP1" source="8505" target="8601" cy:directed="1"/>
      <edge id="11710" label="Q9DBG3 (pp) P60879" source="8505" target="8350" cy:directed="1"/>
      <edge id="11709" label="Q9DBG3 (pp) P62743" source="8505" target="8626" cy:directed="1"/>
      <edge id="11708" label="Q9DBG3 (pp) P63101" source="8505" target="8448" cy:directed="1"/>
      <edge id="11707" label="Q9DBG3 (pp) P17426" source="8505" target="8260" cy:directed="1"/>
      <edge id="11706" label="Q9DBG3 (pp) Q68FD5" source="8505" target="8345" cy:directed="1"/>
      <edge id="11705" label="Q9DBG3 (pp) O70161" source="8505" target="8277" cy:directed="1"/>
      <edge id="11704" label="Q9DBG3 (pp) O08585" source="8505" target="8576" cy:directed="1"/>
      <edge id="11703" label="Q9DBG3 (pp) Q6IRU5" source="8505" target="8506" cy:directed="1"/>
      <edge id="11702" label="P10637 (pp) Q99LX0" source="8503" target="8286" cy:directed="1"/>
      <edge id="11701" label="P10637 (pp) Q9D8Y0" source="8503" target="8752" cy:directed="1"/>
      <edge id="11700" label="P10637 (pp) Q9QXJ1" source="8503" target="8539" cy:directed="1"/>
      <edge id="11699" label="P10637 (pp) O55042" source="8503" target="8585" cy:directed="1"/>
      <edge id="11698" label="P10637 (pp) P04925" source="8503" target="8354" cy:directed="1"/>
      <edge id="11697" label="P10637 (pp) P12023" source="8503" target="8294" cy:directed="1"/>
      <edge id="11696" label="Q922R8 (pp) P12023" source="8502" target="8294" cy:directed="1"/>
      <edge id="11695" label="P47857 (pp) Q9R0Y5" source="8500" target="8541" cy:directed="1"/>
      <edge id="11694" label="P47857 (pp) P05063" source="8500" target="8481" cy:directed="1"/>
      <edge id="11693" label="P47857 (pp) P05064" source="8500" target="8290" cy:directed="1"/>
      <edge id="11692" label="P47857 (pp) P63101" source="8500" target="8448" cy:directed="1"/>
      <edge id="11691" label="Q62048 (pp) P63085" source="8498" target="8224" cy:directed="1"/>
      <edge id="11690" label="Q99104 (pp) P35438" source="8497" target="8184" cy:directed="1"/>
      <edge id="11689" label="Q99104 (pp) P63101" source="8497" target="8448" cy:directed="1"/>
      <edge id="11688" label="Q99104 (pp) P08551" source="8497" target="8684" cy:directed="1"/>
      <edge id="11687" label="Q99104 (pp) P03995" source="8497" target="8535" cy:directed="1"/>
      <edge id="11686" label="Q99104 (pp) Q01097" source="8497" target="8173" cy:directed="1"/>
      <edge id="11685" label="P60766 (pp) Q8BG51" source="8496" target="8366" cy:directed="1"/>
      <edge id="11684" label="P60766 (pp) Q5FWK3" source="8496" target="8459" cy:directed="1"/>
      <edge id="11683" label="P60766 (pp) Q99PT1" source="8496" target="8402" cy:directed="1"/>
      <edge id="11682" label="P60766 (pp) P63005" source="8496" target="8275" cy:directed="1"/>
      <edge id="11681" label="Q6R891 (pp) P63101" source="8495" target="8448" cy:directed="1"/>
      <edge id="11680" label="Q6R891 (pp) Q60875" source="8495" target="8610" cy:directed="1"/>
      <edge id="11679" label="Q6R891 (pp) Q62277" source="8495" target="8323" cy:directed="1"/>
      <edge id="11678" label="P62835 (pp) P35438" source="8494" target="8184" cy:directed="1"/>
      <edge id="11677" label="Q8BLK3 (pp) P04925" source="8493" target="8354" cy:directed="1"/>
      <edge id="11676" label="Q91ZX7 (pp) Q9D6K5" source="8492" target="8755" cy:directed="1"/>
      <edge id="11675" label="Q91ZX7 (pp) P12023" source="8492" target="8294" cy:directed="1"/>
      <edge id="11674" label="P08226 (pp) P20357" source="8491" target="8589" cy:directed="1"/>
      <edge id="11673" label="P08226 (pp) P10637" source="8491" target="8503" cy:directed="1"/>
      <edge id="11672" label="P08226 (pp) P12023" source="8491" target="8294" cy:directed="1"/>
      <edge id="11671" label="P08226 (pp) P04925" source="8491" target="8354" cy:directed="1"/>
      <edge id="11670" label="P08226 (pp) Q91ZX7" source="8491" target="8492" cy:directed="1"/>
      <edge id="11669" label="Q8R0S4 (pp) Q9D6F9" source="8490" target="8596" cy:directed="1"/>
      <edge id="11668" label="Q61290 (pp) Q8R0S4" source="8489" target="8490" cy:directed="1"/>
      <edge id="11667" label="P42125 (pp) Q99JY0" source="8488" target="8353" cy:directed="1"/>
      <edge id="11666" label="P42125 (pp) Q8K1Z0" source="8488" target="8288" cy:directed="1"/>
      <edge id="11665" label="P42125 (pp) Q8BH95" source="8488" target="8217" cy:directed="1"/>
      <edge id="11664" label="P42125 (pp) Q91YT0" source="8488" target="8348" cy:directed="1"/>
      <edge id="11663" label="P42125 (pp) Q9CQ62" source="8488" target="8254" cy:directed="1"/>
      <edge id="11662" label="P42125 (pp) O08756" source="8488" target="8352" cy:directed="1"/>
      <edge id="11661" label="P42125 (pp) Q9DCJ5" source="8488" target="8349" cy:directed="1"/>
      <edge id="11660" label="P42125 (pp) Q99LC5" source="8488" target="8284" cy:directed="1"/>
      <edge id="11659" label="P42125 (pp) P51174" source="8488" target="8361" cy:directed="1"/>
      <edge id="11658" label="P42125 (pp) Q61425" source="8488" target="8283" cy:directed="1"/>
      <edge id="11657" label="P42125 (pp) O09111" source="8488" target="8180" cy:directed="1"/>
      <edge id="11656" label="P42125 (pp) Q8BMS1" source="8488" target="8485" cy:directed="1"/>
      <edge id="11655" label="P42125 (pp) Q9JHI5" source="8488" target="8422" cy:directed="1"/>
      <edge id="11654" label="P42125 (pp) Q9Z1P6" source="8488" target="8268" cy:directed="1"/>
      <edge id="11653" label="Q8BGD5 (pp) P50544" source="8487" target="8428" cy:directed="1"/>
      <edge id="11652" label="Q9Z268 (pp) Q06335" source="8486" target="8187" cy:directed="1"/>
      <edge id="11651" label="P17182 (pp) Q9DCD0" source="8484" target="8191" cy:directed="1"/>
      <edge id="11650" label="P17182 (pp) Q9WUA3" source="8484" target="8479" cy:directed="1"/>
      <edge id="11649" label="P17182 (pp) P63101" source="8484" target="8448" cy:directed="1"/>
      <edge id="11648" label="Q9CPW4 (pp) Q9JM76" source="8483" target="8347" cy:directed="1"/>
      <edge id="11647" label="Q9CPW4 (pp) P59999" source="8483" target="8461" cy:directed="1"/>
      <edge id="11646" label="Q8BKZ9 (pp) P97807" source="8482" target="8309" cy:directed="1"/>
      <edge id="11645" label="Q8BKZ9 (pp) Q60597" source="8482" target="8480" cy:directed="1"/>
      <edge id="11644" label="Q8BKZ9 (pp) Q9D051" source="8482" target="8178" cy:directed="1"/>
      <edge id="11643" label="Q8BKZ9 (pp) Q922H2" source="8482" target="8660" cy:directed="1"/>
      <edge id="11642" label="Q8BKZ9 (pp) P35486" source="8482" target="8408" cy:directed="1"/>
      <edge id="11641" label="Q8BKZ9 (pp) Q8BMF4" source="8482" target="8222" cy:directed="1"/>
      <edge id="11640" label="P05063 (pp) P17182" source="8481" target="8484" cy:directed="1"/>
      <edge id="11639" label="P05063 (pp) Q91VR2" source="8481" target="8232" cy:directed="1"/>
      <edge id="11638" label="P05063 (pp) P17710" source="8481" target="8291" cy:directed="1"/>
      <edge id="11637" label="P05063 (pp) Q9WUA3" source="8481" target="8479" cy:directed="1"/>
      <edge id="11636" label="Q9WUA3 (pp) P63101" source="8479" target="8448" cy:directed="1"/>
      <edge id="11635" label="P61982 (pp) P35438" source="8478" target="8184" cy:directed="1"/>
      <edge id="11634" label="P61982 (pp) P10637" source="8478" target="8503" cy:directed="1"/>
      <edge id="11633" label="P61982 (pp) Q9DC28" source="8478" target="8621" cy:directed="1"/>
      <edge id="11632" label="P61982 (pp) P62259" source="8478" target="8194" cy:directed="1"/>
      <edge id="11631" label="P61982 (pp) P63101" source="8478" target="8448" cy:directed="1"/>
      <edge id="11630" label="P07901 (pp) Q61699" source="8477" target="8687" cy:directed="1"/>
      <edge id="11629" label="P07901 (pp) Q60864" source="8477" target="8343" cy:directed="1"/>
      <edge id="11628" label="P07901 (pp) Q9DC28" source="8477" target="8621" cy:directed="1"/>
      <edge id="11627" label="P07901 (pp) Q99KJ8" source="8477" target="8305" cy:directed="1"/>
      <edge id="11626" label="P07901 (pp) P63038" source="8477" target="8216" cy:directed="1"/>
      <edge id="11625" label="P07901 (pp) Q9CR16" source="8477" target="8704" cy:directed="1"/>
      <edge id="11624" label="P07901 (pp) P62259" source="8477" target="8194" cy:directed="1"/>
      <edge id="11623" label="P07901 (pp) P63037" source="8477" target="8248" cy:directed="1"/>
      <edge id="11622" label="P07901 (pp) P11499" source="8477" target="8289" cy:directed="1"/>
      <edge id="11621" label="P07901 (pp) P61982" source="8477" target="8478" cy:directed="1"/>
      <edge id="11620" label="P06837 (pp) P62204" source="8476" target="8548" cy:directed="1"/>
      <edge id="11619" label="P15116 (pp) P30999" source="8475" target="8553" cy:directed="1"/>
      <edge id="11618" label="P15116 (pp) P23242" source="8475" target="8701" cy:directed="1"/>
      <edge id="11617" label="P15116 (pp) P35438" source="8475" target="8184" cy:directed="1"/>
      <edge id="11616" label="P15116 (pp) Q02248" source="8475" target="8312" cy:directed="1"/>
      <edge id="11615" label="Q7TQF7 (pp) Q62420" source="8474" target="8440" cy:directed="1"/>
      <edge id="11614" label="Q7TQF7 (pp) Q8BZ98" source="8474" target="8653" cy:directed="1"/>
      <edge id="11613" label="Q7TQF7 (pp) Q9DBG3" source="8474" target="8505" cy:directed="1"/>
      <edge id="11612" label="Q7TQF7 (pp) P39053" source="8474" target="8466" cy:directed="1"/>
      <edge id="11611" label="Q7TQF7 (pp) Q8CHC4" source="8474" target="8608" cy:directed="1"/>
      <edge id="11610" label="Q7TQF7 (pp) Q9EP69" source="8474" target="8439" cy:directed="1"/>
      <edge id="11609" label="Q7TQF7 (pp) Q68FD5" source="8474" target="8345" cy:directed="1"/>
      <edge id="11608" label="Q7TQF7 (pp) P17427" source="8474" target="8259" cy:directed="1"/>
      <edge id="11607" label="Q99L47 (pp) P63038" source="8473" target="8216" cy:directed="1"/>
      <edge id="11606" label="P29758 (pp) P15105" source="8472" target="8251" cy:directed="1"/>
      <edge id="11605" label="P29758 (pp) P12023" source="8472" target="8294" cy:directed="1"/>
      <edge id="11604" label="Q8CHT0 (pp) P15105" source="8471" target="8251" cy:directed="1"/>
      <edge id="11603" label="Q8CHT0 (pp) Q9DBF1" source="8471" target="8451" cy:directed="1"/>
      <edge id="11602" label="Q8CHT0 (pp) P29758" source="8471" target="8472" cy:directed="1"/>
      <edge id="11601" label="P97772 (pp) P35438" source="8470" target="8184" cy:directed="1"/>
      <edge id="11600" label="P97772 (pp) Q3UHD9" source="8470" target="8210" cy:directed="1"/>
      <edge id="11599" label="P31324 (pp) P68181" source="8468" target="8600" cy:directed="1"/>
      <edge id="11598" label="P31324 (pp) P35438" source="8468" target="8184" cy:directed="1"/>
      <edge id="11597" label="P31324 (pp) P63101" source="8468" target="8448" cy:directed="1"/>
      <edge id="11596" label="P31324 (pp) P20357" source="8468" target="8589" cy:directed="1"/>
      <edge id="11595" label="P31324 (pp) P12367" source="8468" target="8386" cy:directed="1"/>
      <edge id="11594" label="P31324 (pp) Q8BR92" source="8468" target="8469" cy:directed="1"/>
      <edge id="11593" label="Q6PB66 (pp) P68510" source="8467" target="8182" cy:directed="1"/>
      <edge id="11592" label="P39053 (pp) Q8CHC4" source="8466" target="8608" cy:directed="1"/>
      <edge id="11591" label="P39053 (pp) Q9CQ92" source="8466" target="8418" cy:directed="1"/>
      <edge id="11590" label="P39053 (pp) O08539" source="8466" target="8565" cy:directed="1"/>
      <edge id="11589" label="P39053 (pp) P35438" source="8466" target="8184" cy:directed="1"/>
      <edge id="11588" label="P39053 (pp) P28740" source="8466" target="8661" cy:directed="1"/>
      <edge id="11587" label="P39053 (pp) P17426" source="8466" target="8260" cy:directed="1"/>
      <edge id="11586" label="P39053 (pp) Q68FD5" source="8466" target="8345" cy:directed="1"/>
      <edge id="11585" label="P39053 (pp) P04925" source="8466" target="8354" cy:directed="1"/>
      <edge id="11584" label="Q6PH08 (pp) Q99NE5" source="8465" target="8705" cy:directed="1"/>
      <edge id="11583" label="Q6PH08 (pp) P62259" source="8465" target="8194" cy:directed="1"/>
      <edge id="11582" label="O88737 (pp) Q99NE5" source="8464" target="8705" cy:directed="1"/>
      <edge id="11581" label="O88737 (pp) Q6PH08" source="8464" target="8465" cy:directed="1"/>
      <edge id="11580" label="Q9CQC7 (pp) Q9D6J6" source="8463" target="8176" cy:directed="1"/>
      <edge id="11579" label="Q9CQC7 (pp) Q9CQQ7" source="8463" target="8378" cy:directed="1"/>
      <edge id="11578" label="Q9CQC7 (pp) Q91YT0" source="8463" target="8348" cy:directed="1"/>
      <edge id="11577" label="Q9CQC7 (pp) Q9DCS9" source="8463" target="8235" cy:directed="1"/>
      <edge id="11576" label="Q9CQC7 (pp) Q3UIU2" source="8463" target="8257" cy:directed="1"/>
      <edge id="11575" label="Q9CQC7 (pp) Q99LC3" source="8463" target="8220" cy:directed="1"/>
      <edge id="11574" label="Q9CQC7 (pp) Q62425" source="8463" target="8514" cy:directed="1"/>
      <edge id="11573" label="Q9CQC7 (pp) Q99LY9" source="8463" target="8221" cy:directed="1"/>
      <edge id="11572" label="Q9CQC7 (pp) Q9D6J5" source="8463" target="8456" cy:directed="1"/>
      <edge id="11571" label="Q9CQC7 (pp) Q8K3J1" source="8463" target="8373" cy:directed="1"/>
      <edge id="11570" label="Q9CQC7 (pp) Q9CQH3" source="8463" target="8209" cy:directed="1"/>
      <edge id="11569" label="Q9CQC7 (pp) Q9DCJ5" source="8463" target="8349" cy:directed="1"/>
      <edge id="11568" label="Q9CQC7 (pp) Q9CQZ6" source="8463" target="8200" cy:directed="1"/>
      <edge id="11567" label="Q9CQC7 (pp) Q9DC69" source="8463" target="8376" cy:directed="1"/>
      <edge id="11566" label="Q9CQC7 (pp) Q9Z1P6" source="8463" target="8268" cy:directed="1"/>
      <edge id="11565" label="Q9CQC7 (pp) Q06185" source="8463" target="8240" cy:directed="1"/>
      <edge id="11564" label="Q9CQC7 (pp) Q9CQ54" source="8463" target="8201" cy:directed="1"/>
      <edge id="11563" label="Q9CVB6 (pp) P59999" source="8462" target="8461" cy:directed="1"/>
      <edge id="11562" label="Q9CVB6 (pp) P47757" source="8462" target="8195" cy:directed="1"/>
      <edge id="11561" label="Q9CVB6 (pp) Q9D898" source="8462" target="8390" cy:directed="1"/>
      <edge id="11560" label="Q9CVB6 (pp) Q99JY9" source="8462" target="8404" cy:directed="1"/>
      <edge id="11559" label="Q9CVB6 (pp) P60710" source="8462" target="8311" cy:directed="1"/>
      <edge id="11558" label="Q9CVB6 (pp) Q9R0Q6" source="8462" target="8346" cy:directed="1"/>
      <edge id="11557" label="Q9CVB6 (pp) P67871" source="8462" target="8631" cy:directed="1"/>
      <edge id="11556" label="Q9CVB6 (pp) Q9CPW4" source="8462" target="8483" cy:directed="1"/>
      <edge id="11555" label="Q9CVB6 (pp) Q9JM76" source="8462" target="8347" cy:directed="1"/>
      <edge id="11554" label="Q5FWK3 (pp) Q9QUI0" source="8459" target="8186" cy:directed="1"/>
      <edge id="11553" label="Q5FWK3 (pp) P63005" source="8459" target="8275" cy:directed="1"/>
      <edge id="11552" label="Q9WTT4 (pp) P63082" source="8458" target="8417" cy:directed="1"/>
      <edge id="11551" label="Q9WTT4 (pp) P50516" source="8458" target="8262" cy:directed="1"/>
      <edge id="11550" label="Q00612 (pp) P06745" source="8457" target="8433" cy:directed="1"/>
      <edge id="11549" label="Q00612 (pp) Q9DCD0" source="8457" target="8191" cy:directed="1"/>
      <edge id="11548" label="Q00612 (pp) P17751" source="8457" target="8266" cy:directed="1"/>
      <edge id="11547" label="Q00612 (pp) P97807" source="8457" target="8309" cy:directed="1"/>
      <edge id="11546" label="Q00612 (pp) P09671" source="8457" target="8413" cy:directed="1"/>
      <edge id="11545" label="Q00612 (pp) P40142" source="8457" target="8328" cy:directed="1"/>
      <edge id="11544" label="Q00612 (pp) Q93092" source="8457" target="8423" cy:directed="1"/>
      <edge id="11543" label="Q9D6J5 (pp) Q9CPQ8" source="8456" target="8233" cy:directed="1"/>
      <edge id="11542" label="Q9D6J5 (pp) Q91YT0" source="8456" target="8348" cy:directed="1"/>
      <edge id="11541" label="Q9D6J5 (pp) Q9DC69" source="8456" target="8376" cy:directed="1"/>
      <edge id="11540" label="Q9D6J5 (pp) Q9D3D9" source="8456" target="8179" cy:directed="1"/>
      <edge id="11539" label="Q9D6J5 (pp) Q9CQQ7" source="8456" target="8378" cy:directed="1"/>
      <edge id="11538" label="Q9D6J5 (pp) Q9CQZ6" source="8456" target="8200" cy:directed="1"/>
      <edge id="11537" label="Q9D6J5 (pp) O09111" source="8456" target="8180" cy:directed="1"/>
      <edge id="11536" label="Q9D6J5 (pp) Q9ERS2" source="8456" target="8308" cy:directed="1"/>
      <edge id="11535" label="Q9D6J5 (pp) Q9DCJ5" source="8456" target="8349" cy:directed="1"/>
      <edge id="11534" label="Q9D6J5 (pp) Q9CQ69" source="8456" target="8203" cy:directed="1"/>
      <edge id="11533" label="Q9D6J5 (pp) Q9DB77" source="8456" target="8374" cy:directed="1"/>
      <edge id="11532" label="Q9D6J5 (pp) Q99LC3" source="8456" target="8220" cy:directed="1"/>
      <edge id="11531" label="Q9D6J5 (pp) Q9DCS9" source="8456" target="8235" cy:directed="1"/>
      <edge id="11530" label="Q9D6J5 (pp) Q3UIU2" source="8456" target="8257" cy:directed="1"/>
      <edge id="11529" label="Q9D6J5 (pp) Q06185" source="8456" target="8240" cy:directed="1"/>
      <edge id="11528" label="Q9D6J5 (pp) Q9CZ13" source="8456" target="8218" cy:directed="1"/>
      <edge id="11527" label="Q9D6J5 (pp) Q9D6J6" source="8456" target="8176" cy:directed="1"/>
      <edge id="11526" label="Q9D6J5 (pp) Q8K3J1" source="8456" target="8373" cy:directed="1"/>
      <edge id="11525" label="Q9D6J5 (pp) Q99LX0" source="8456" target="8286" cy:directed="1"/>
      <edge id="11524" label="Q9D6J5 (pp) Q9CQH3" source="8456" target="8209" cy:directed="1"/>
      <edge id="11523" label="Q9D6J5 (pp) Q9Z1P6" source="8456" target="8268" cy:directed="1"/>
      <edge id="11522" label="Q9D6J5 (pp) Q9CQ54" source="8456" target="8201" cy:directed="1"/>
      <edge id="11521" label="Q9D6J5 (pp) Q91VD9" source="8456" target="8234" cy:directed="1"/>
      <edge id="11520" label="Q9D6J5 (pp) Q91VR2" source="8456" target="8232" cy:directed="1"/>
      <edge id="11519" label="P23506 (pp) Q9CQH3" source="8455" target="8209" cy:directed="1"/>
      <edge id="11518" label="Q6PCP5 (pp) P23506" source="8454" target="8455" cy:directed="1"/>
      <edge id="11517" label="Q8VDN2 (pp) P35438" source="8453" target="8184" cy:directed="1"/>
      <edge id="11516" label="Q8VDN2 (pp) P14094" source="8453" target="8405" cy:directed="1"/>
      <edge id="11515" label="Q8VDN2 (pp) Q01097" source="8453" target="8173" cy:directed="1"/>
      <edge id="11514" label="Q8VDN2 (pp) P63044" source="8453" target="8369" cy:directed="1"/>
      <edge id="11513" label="Q8VDN2 (pp) P70414" source="8453" target="8544" cy:directed="1"/>
      <edge id="11512" label="Q8VDN2 (pp) P60879" source="8453" target="8350" cy:directed="1"/>
      <edge id="11511" label="Q8VDN2 (pp) P23819" source="8453" target="8188" cy:directed="1"/>
      <edge id="11510" label="Q9QWI6 (pp) Q68FF6" source="8449" target="8552" cy:directed="1"/>
      <edge id="11509" label="Q9QWI6 (pp) P05480" source="8449" target="8313" cy:directed="1"/>
      <edge id="11508" label="Q9QWI6 (pp) Q8R001" source="8449" target="8450" cy:directed="1"/>
      <edge id="11507" label="P63101 (pp) Q64332" source="8448" target="8567" cy:directed="1"/>
      <edge id="11506" label="P63101 (pp) P10637" source="8448" target="8503" cy:directed="1"/>
      <edge id="11505" label="P63101 (pp) P20357" source="8448" target="8589" cy:directed="1"/>
      <edge id="11504" label="P63101 (pp) P08553" source="8448" target="8686" cy:directed="1"/>
      <edge id="11503" label="P63101 (pp) Q80U28" source="8448" target="8628" cy:directed="1"/>
      <edge id="11502" label="P63101 (pp) P17156" source="8448" target="8547" cy:directed="1"/>
      <edge id="11501" label="P63101 (pp) P47757" source="8448" target="8195" cy:directed="1"/>
      <edge id="11500" label="P63101 (pp) Q8BPN8" source="8448" target="8416" cy:directed="1"/>
      <edge id="11499" label="P63101 (pp) P16546" source="8448" target="8197" cy:directed="1"/>
      <edge id="11498" label="P63101 (pp) P13020" source="8448" target="8746" cy:directed="1"/>
      <edge id="11497" label="P63101 (pp) F6SEU4" source="8448" target="8732" cy:directed="1"/>
      <edge id="11496" label="P63101 (pp) Q60875" source="8448" target="8610" cy:directed="1"/>
      <edge id="11495" label="P63101 (pp) Q920I9" source="8448" target="8432" cy:directed="1"/>
      <edge id="11494" label="P63101 (pp) Q9R0K7" source="8448" target="8392" cy:directed="1"/>
      <edge id="11493" label="P63101 (pp) P30999" source="8448" target="8553" cy:directed="1"/>
      <edge id="11492" label="P63101 (pp) P60469" source="8448" target="8582" cy:directed="1"/>
      <edge id="11491" label="P63101 (pp) P12367" source="8448" target="8386" cy:directed="1"/>
      <edge id="11490" label="P63101 (pp) P16330" source="8448" target="8534" cy:directed="1"/>
      <edge id="11489" label="P63101 (pp) P28652" source="8448" target="8545" cy:directed="1"/>
      <edge id="11488" label="P63101 (pp) Q7TSJ2" source="8448" target="8689" cy:directed="1"/>
      <edge id="11487" label="P63101 (pp) Q925I1" source="8448" target="8558" cy:directed="1"/>
      <edge id="11486" label="P63101 (pp) P28740" source="8448" target="8661" cy:directed="1"/>
      <edge id="11485" label="P63101 (pp) P46660" source="8448" target="8370" cy:directed="1"/>
      <edge id="11484" label="P63101 (pp) O88935" source="8448" target="8400" cy:directed="1"/>
      <edge id="11483" label="P63101 (pp) Q62465" source="8448" target="8605" cy:directed="1"/>
      <edge id="11482" label="P63101 (pp) P63328" source="8448" target="8584" cy:directed="1"/>
      <edge id="11481" label="P63101 (pp) P62482" source="8448" target="8554" cy:directed="1"/>
      <edge id="11480" label="Q61879 (pp) P35438" source="8447" target="8184" cy:directed="1"/>
      <edge id="11479" label="Q61879 (pp) P63101" source="8447" target="8448" cy:directed="1"/>
      <edge id="11478" label="Q91ZA3 (pp) Q99JY0" source="8446" target="8353" cy:directed="1"/>
      <edge id="11477" label="Q91ZA3 (pp) Q9EQ20" source="8446" target="8331" cy:directed="1"/>
      <edge id="11476" label="Q3UMR5 (pp) P50516" source="8445" target="8262" cy:directed="1"/>
      <edge id="11475" label="P56382 (pp) Q03265" source="8444" target="8181" cy:directed="1"/>
      <edge id="11474" label="P56382 (pp) Q91VM9" source="8444" target="8375" cy:directed="1"/>
      <edge id="11473" label="P56382 (pp) Q91VR2" source="8444" target="8232" cy:directed="1"/>
      <edge id="11472" label="P56382 (pp) P56480" source="8444" target="8227" cy:directed="1"/>
      <edge id="11471" label="P56382 (pp) Q9D3D9" source="8444" target="8179" cy:directed="1"/>
      <edge id="11470" label="P56382 (pp) Q9CQZ5" source="8444" target="8175" cy:directed="1"/>
      <edge id="11469" label="P56382 (pp) P03930" source="8444" target="8357" cy:directed="1"/>
      <edge id="11468" label="P56382 (pp) Q9CQQ7" source="8444" target="8378" cy:directed="1"/>
      <edge id="11467" label="P56382 (pp) Q9DB20" source="8444" target="8208" cy:directed="1"/>
      <edge id="11466" label="P56382 (pp) Q99LX0" source="8444" target="8286" cy:directed="1"/>
      <edge id="11465" label="P56382 (pp) Q9DCX2" source="8444" target="8335" cy:directed="1"/>
      <edge id="11464" label="P56382 (pp) Q06185" source="8444" target="8240" cy:directed="1"/>
      <edge id="11463" label="P56382 (pp) P97450" source="8444" target="8399" cy:directed="1"/>
      <edge id="11462" label="P09103 (pp) Q922R8" source="8443" target="8502" cy:directed="1"/>
      <edge id="11461" label="P09103 (pp) P04925" source="8443" target="8354" cy:directed="1"/>
      <edge id="11460" label="P09103 (pp) P63038" source="8443" target="8216" cy:directed="1"/>
      <edge id="11459" label="P14873 (pp) Q9QYR6" source="8442" target="8577" cy:directed="1"/>
      <edge id="11458" label="P14873 (pp) P63005" source="8442" target="8275" cy:directed="1"/>
      <edge id="11457" label="P14873 (pp) P62259" source="8442" target="8194" cy:directed="1"/>
      <edge id="11456" label="P43024 (pp) Q9ERS2" source="8441" target="8308" cy:directed="1"/>
      <edge id="11455" label="P43024 (pp) P56391" source="8441" target="8300" cy:directed="1"/>
      <edge id="11454" label="P43024 (pp) Q9DCX2" source="8441" target="8335" cy:directed="1"/>
      <edge id="11453" label="P43024 (pp) Q9D3D9" source="8441" target="8179" cy:directed="1"/>
      <edge id="11452" label="P43024 (pp) P00405" source="8441" target="8638" cy:directed="1"/>
      <edge id="11451" label="P43024 (pp) Q91VR2" source="8441" target="8232" cy:directed="1"/>
      <edge id="11450" label="P43024 (pp) Q9CQ69" source="8441" target="8203" cy:directed="1"/>
      <edge id="11449" label="Q62420 (pp) P39053" source="8440" target="8466" cy:directed="1"/>
      <edge id="11448" label="Q62420 (pp) O08585" source="8440" target="8576" cy:directed="1"/>
      <edge id="11447" label="Q9EP69 (pp) Q8CHC4" source="8439" target="8608" cy:directed="1"/>
      <edge id="11446" label="Q9EP69 (pp) Q68FD5" source="8439" target="8345" cy:directed="1"/>
      <edge id="11445" label="Q9EP69 (pp) Q62420" source="8439" target="8440" cy:directed="1"/>
      <edge id="11444" label="P26040 (pp) P11627" source="8438" target="8530" cy:directed="1"/>
      <edge id="11443" label="P70441 (pp) P26040" source="8437" target="8438" cy:directed="1"/>
      <edge id="11442" label="P61264 (pp) P63044" source="8436" target="8369" cy:directed="1"/>
      <edge id="11441" label="Q7TPR4 (pp) Q2PFD7" source="8435" target="8719" cy:directed="1"/>
      <edge id="11440" label="Q3UTJ2 (pp) O08917" source="8434" target="8711" cy:directed="1"/>
      <edge id="11439" label="Q3UTJ2 (pp) Q7TPR4" source="8434" target="8435" cy:directed="1"/>
      <edge id="11438" label="P06745 (pp) P17710" source="8433" target="8291" cy:directed="1"/>
      <edge id="11437" label="P06745 (pp) P05063" source="8433" target="8481" cy:directed="1"/>
      <edge id="11436" label="P06745 (pp) P09411" source="8433" target="8267" cy:directed="1"/>
      <edge id="11435" label="P06745 (pp) P16858" source="8433" target="8528" cy:directed="1"/>
      <edge id="11434" label="P06745 (pp) P06151" source="8433" target="8207" cy:directed="1"/>
      <edge id="11433" label="P06745 (pp) Q9D0F9" source="8433" target="8604" cy:directed="1"/>
      <edge id="11432" label="P06745 (pp) Q9DCD0" source="8433" target="8191" cy:directed="1"/>
      <edge id="11431" label="P06745 (pp) P17182" source="8433" target="8484" cy:directed="1"/>
      <edge id="11430" label="P06745 (pp) O55023" source="8433" target="8611" cy:directed="1"/>
      <edge id="11429" label="P06745 (pp) P47857" source="8433" target="8500" cy:directed="1"/>
      <edge id="11428" label="P06745 (pp) Q05920" source="8433" target="8223" cy:directed="1"/>
      <edge id="11427" label="P06745 (pp) Q9WUM5" source="8433" target="8245" cy:directed="1"/>
      <edge id="11426" label="P06745 (pp) Q9WUA3" source="8433" target="8479" cy:directed="1"/>
      <edge id="11425" label="P06745 (pp) P05064" source="8433" target="8290" cy:directed="1"/>
      <edge id="11424" label="Q920I9 (pp) Q8BPN8" source="8432" target="8416" cy:directed="1"/>
      <edge id="11423" label="Q923T9 (pp) P63101" source="8431" target="8448" cy:directed="1"/>
      <edge id="11422" label="Q923T9 (pp) P35436" source="8431" target="8189" cy:directed="1"/>
      <edge id="11421" label="P63040 (pp) P63044" source="8430" target="8369" cy:directed="1"/>
      <edge id="11420" label="Q61831 (pp) Q01097" source="8429" target="8173" cy:directed="1"/>
      <edge id="11419" label="Q61831 (pp) P35438" source="8429" target="8184" cy:directed="1"/>
      <edge id="11418" label="P50544 (pp) Q8BMS1" source="8428" target="8485" cy:directed="1"/>
      <edge id="11417" label="P50544 (pp) Q91WC3" source="8428" target="8591" cy:directed="1"/>
      <edge id="11416" label="P50544 (pp) P41216" source="8428" target="8597" cy:directed="1"/>
      <edge id="11415" label="Q9Z2I9 (pp) Q99LC5" source="8427" target="8284" cy:directed="1"/>
      <edge id="11414" label="Q9Z2I9 (pp) P97807" source="8427" target="8309" cy:directed="1"/>
      <edge id="11413" label="Q9Z2I9 (pp) Q9D023" source="8427" target="8385" cy:directed="1"/>
      <edge id="11412" label="Q9Z2I9 (pp) Q9D2G2" source="8427" target="8256" cy:directed="1"/>
      <edge id="11411" label="Q9Z2I9 (pp) P50516" source="8427" target="8262" cy:directed="1"/>
      <edge id="11410" label="Q9Z2I9 (pp) Q8R4N0" source="8427" target="8320" cy:directed="1"/>
      <edge id="11409" label="Q9Z2I9 (pp) Q03265" source="8427" target="8181" cy:directed="1"/>
      <edge id="11408" label="Q9Z2I9 (pp) Q8CAQ8" source="8427" target="8522" cy:directed="1"/>
      <edge id="11407" label="Q9Z2I9 (pp) Q91VD9" source="8427" target="8234" cy:directed="1"/>
      <edge id="11406" label="Q9Z2I9 (pp) P23506" source="8427" target="8455" cy:directed="1"/>
      <edge id="11405" label="Q9Z2I9 (pp) Q9WUM5" source="8427" target="8245" cy:directed="1"/>
      <edge id="11404" label="Q9Z2I9 (pp) Q60597" source="8427" target="8480" cy:directed="1"/>
      <edge id="11403" label="Q61301 (pp) P15116" source="8426" target="8475" cy:directed="1"/>
      <edge id="11402" label="Q9DB05 (pp) P46460" source="8425" target="8252" cy:directed="1"/>
      <edge id="11401" label="P52480 (pp) P17710" source="8424" target="8291" cy:directed="1"/>
      <edge id="11400" label="P52480 (pp) P06745" source="8424" target="8433" cy:directed="1"/>
      <edge id="11399" label="P52480 (pp) P05064" source="8424" target="8290" cy:directed="1"/>
      <edge id="11398" label="P52480 (pp) Q05920" source="8424" target="8223" cy:directed="1"/>
      <edge id="11397" label="P52480 (pp) Q9WUB3" source="8424" target="8606" cy:directed="1"/>
      <edge id="11396" label="P52480 (pp) P06151" source="8424" target="8207" cy:directed="1"/>
      <edge id="11395" label="P52480 (pp) Q9DCD0" source="8424" target="8191" cy:directed="1"/>
      <edge id="11394" label="P52480 (pp) P09411" source="8424" target="8267" cy:directed="1"/>
      <edge id="11393" label="P52480 (pp) P05063" source="8424" target="8481" cy:directed="1"/>
      <edge id="11392" label="P52480 (pp) Q8BH04" source="8424" target="8593" cy:directed="1"/>
      <edge id="11391" label="P52480 (pp) Q9WUA3" source="8424" target="8479" cy:directed="1"/>
      <edge id="11390" label="P52480 (pp) P47857" source="8424" target="8500" cy:directed="1"/>
      <edge id="11389" label="P52480 (pp) Q9R0Y5" source="8424" target="8541" cy:directed="1"/>
      <edge id="11388" label="P52480 (pp) P17182" source="8424" target="8484" cy:directed="1"/>
      <edge id="11387" label="P52480 (pp) P54071" source="8424" target="8206" cy:directed="1"/>
      <edge id="11386" label="Q93092 (pp) P97807" source="8423" target="8309" cy:directed="1"/>
      <edge id="11385" label="Q93092 (pp) P05063" source="8423" target="8481" cy:directed="1"/>
      <edge id="11384" label="Q93092 (pp) P05064" source="8423" target="8290" cy:directed="1"/>
      <edge id="11383" label="Q93092 (pp) P06745" source="8423" target="8433" cy:directed="1"/>
      <edge id="11382" label="Q93092 (pp) Q9D0F9" source="8423" target="8604" cy:directed="1"/>
      <edge id="11381" label="Q93092 (pp) P17710" source="8423" target="8291" cy:directed="1"/>
      <edge id="11380" label="Q93092 (pp) Q9WUA3" source="8423" target="8479" cy:directed="1"/>
      <edge id="11379" label="Q93092 (pp) P17182" source="8423" target="8484" cy:directed="1"/>
      <edge id="11378" label="Q93092 (pp) Q9DCD0" source="8423" target="8191" cy:directed="1"/>
      <edge id="11377" label="Q93092 (pp) P06151" source="8423" target="8207" cy:directed="1"/>
      <edge id="11376" label="Q93092 (pp) P47857" source="8423" target="8500" cy:directed="1"/>
      <edge id="11375" label="Q93092 (pp) P52480" source="8423" target="8424" cy:directed="1"/>
      <edge id="11374" label="Q9JHI5 (pp) Q99LC5" source="8422" target="8284" cy:directed="1"/>
      <edge id="11373" label="Q9JHI5 (pp) Q61425" source="8422" target="8283" cy:directed="1"/>
      <edge id="11372" label="Q9JHI5 (pp) Q99MR8" source="8422" target="8594" cy:directed="1"/>
      <edge id="11371" label="Q9JHI5 (pp) Q8BMS1" source="8422" target="8485" cy:directed="1"/>
      <edge id="11370" label="P53395 (pp) Q9DBL1" source="8421" target="8420" cy:directed="1"/>
      <edge id="11369" label="P53395 (pp) Q3ULD5" source="8421" target="8319" cy:directed="1"/>
      <edge id="11368" label="P53395 (pp) Q9D051" source="8421" target="8178" cy:directed="1"/>
      <edge id="11367" label="P53395 (pp) Q99MN9" source="8421" target="8403" cy:directed="1"/>
      <edge id="11366" label="P53395 (pp) Q60597" source="8421" target="8480" cy:directed="1"/>
      <edge id="11365" label="P53395 (pp) Q8K2B3" source="8421" target="8316" cy:directed="1"/>
      <edge id="11364" label="P53395 (pp) P35486" source="8421" target="8408" cy:directed="1"/>
      <edge id="11363" label="P53395 (pp) Q9WUM5" source="8421" target="8245" cy:directed="1"/>
      <edge id="11362" label="P53395 (pp) O08749" source="8421" target="8177" cy:directed="1"/>
      <edge id="11361" label="P53395 (pp) Q9JHI5" source="8421" target="8422" cy:directed="1"/>
      <edge id="11360" label="Q9DBL1 (pp) Q8BMS1" source="8420" target="8485" cy:directed="1"/>
      <edge id="11359" label="Q9CQ92 (pp) Q8BZ98" source="8418" target="8653" cy:directed="1"/>
      <edge id="11358" label="Q9CQ92 (pp) Q6PCP5" source="8418" target="8454" cy:directed="1"/>
      <edge id="11357" label="Q9CQ92 (pp) Q8K1M6" source="8418" target="8419" cy:directed="1"/>
      <edge id="11356" label="Q8BPN8 (pp) Q5SQX6" source="8416" target="8572" cy:directed="1"/>
      <edge id="11355" label="Q8BPN8 (pp) P12382" source="8416" target="8183" cy:directed="1"/>
      <edge id="11354" label="Q8BPN8 (pp) Q9Z1G3" source="8416" target="8193" cy:directed="1"/>
      <edge id="11353" label="Q8BPN8 (pp) P63318" source="8416" target="8635" cy:directed="1"/>
      <edge id="11352" label="Q8BPN8 (pp) Q9WUA3" source="8416" target="8479" cy:directed="1"/>
      <edge id="11351" label="Q8BPN8 (pp) P28660" source="8416" target="8351" cy:directed="1"/>
      <edge id="11350" label="Q8BPN8 (pp) P70404" source="8416" target="8263" cy:directed="1"/>
      <edge id="11349" label="P18572 (pp) O35465" source="8414" target="8415" cy:directed="1"/>
      <edge id="11348" label="P09671 (pp) Q99KI0" source="8413" target="8307" cy:directed="1"/>
      <edge id="11347" label="P09671 (pp) Q9WUM5" source="8413" target="8245" cy:directed="1"/>
      <edge id="11346" label="P09671 (pp) Q03265" source="8413" target="8181" cy:directed="1"/>
      <edge id="11345" label="P09671 (pp) Q9QUH0" source="8413" target="8395" cy:directed="1"/>
      <edge id="11344" label="P09671 (pp) Q9CQA3" source="8413" target="8281" cy:directed="1"/>
      <edge id="11343" label="P09671 (pp) Q9CR68" source="8413" target="8236" cy:directed="1"/>
      <edge id="11342" label="P09671 (pp) P20108" source="8413" target="8396" cy:directed="1"/>
      <edge id="11341" label="P09671 (pp) Q9DCJ5" source="8413" target="8349" cy:directed="1"/>
      <edge id="11340" label="P09671 (pp) P97807" source="8413" target="8309" cy:directed="1"/>
      <edge id="11339" label="P09671 (pp) Q8K3J1" source="8413" target="8373" cy:directed="1"/>
      <edge id="11338" label="P09671 (pp) P17751" source="8413" target="8266" cy:directed="1"/>
      <edge id="11337" label="P09671 (pp) Q9D6J5" source="8413" target="8456" cy:directed="1"/>
      <edge id="11336" label="P09671 (pp) Q80Y14" source="8413" target="8571" cy:directed="1"/>
      <edge id="11335" label="P09671 (pp) Q64521" source="8413" target="8394" cy:directed="1"/>
      <edge id="11334" label="P09671 (pp) Q9D0M3" source="8413" target="8219" cy:directed="1"/>
      <edge id="11333" label="P09671 (pp) Q99LX0" source="8413" target="8286" cy:directed="1"/>
      <edge id="11332" label="P09671 (pp) P52503" source="8413" target="8321" cy:directed="1"/>
      <edge id="11331" label="P09671 (pp) Q91YT0" source="8413" target="8348" cy:directed="1"/>
      <edge id="11330" label="P09671 (pp) Q9DCD0" source="8413" target="8191" cy:directed="1"/>
      <edge id="11329" label="P09671 (pp) Q9DC69" source="8413" target="8376" cy:directed="1"/>
      <edge id="11328" label="P09671 (pp) P08249" source="8413" target="8204" cy:directed="1"/>
      <edge id="11327" label="P09671 (pp) Q9DC70" source="8413" target="8241" cy:directed="1"/>
      <edge id="11326" label="P09671 (pp) P63038" source="8413" target="8216" cy:directed="1"/>
      <edge id="11325" label="P09671 (pp) Q9CXZ1" source="8413" target="8365" cy:directed="1"/>
      <edge id="11324" label="P09671 (pp) O70325" source="8413" target="8271" cy:directed="1"/>
      <edge id="11323" label="P09671 (pp) Q9CQQ7" source="8413" target="8378" cy:directed="1"/>
      <edge id="11322" label="P09671 (pp) P99029" source="8413" target="8325" cy:directed="1"/>
      <edge id="11321" label="P09671 (pp) P06745" source="8413" target="8433" cy:directed="1"/>
      <edge id="11320" label="P09671 (pp) Q9D2G2" source="8413" target="8256" cy:directed="1"/>
      <edge id="11319" label="P09671 (pp) Q9CPP6" source="8413" target="8250" cy:directed="1"/>
      <edge id="11318" label="P09671 (pp) Q9D6J6" source="8413" target="8176" cy:directed="1"/>
      <edge id="11317" label="P09671 (pp) Q91VD9" source="8413" target="8234" cy:directed="1"/>
      <edge id="11316" label="P09671 (pp) P09411" source="8413" target="8267" cy:directed="1"/>
      <edge id="11315" label="P09671 (pp) Q9CQH3" source="8413" target="8209" cy:directed="1"/>
      <edge id="11314" label="P16054 (pp) P05480" source="8412" target="8313" cy:directed="1"/>
      <edge id="11313" label="P16054 (pp) P67778" source="8412" target="8230" cy:directed="1"/>
      <edge id="11312" label="P16054 (pp) P17182" source="8412" target="8484" cy:directed="1"/>
      <edge id="11311" label="P16054 (pp) Q9CQA3" source="8412" target="8281" cy:directed="1"/>
      <edge id="11310" label="P16054 (pp) Q9CQ62" source="8412" target="8254" cy:directed="1"/>
      <edge id="11309" label="P16054 (pp) Q9CQR4" source="8412" target="8327" cy:directed="1"/>
      <edge id="11308" label="P16054 (pp) P35438" source="8412" target="8184" cy:directed="1"/>
      <edge id="11307" label="P16054 (pp) Q99JY0" source="8412" target="8353" cy:directed="1"/>
      <edge id="11306" label="P16054 (pp) Q9CR62" source="8412" target="8715" cy:directed="1"/>
      <edge id="11305" label="P16054 (pp) P23242" source="8412" target="8701" cy:directed="1"/>
      <edge id="11304" label="P16054 (pp) P63038" source="8412" target="8216" cy:directed="1"/>
      <edge id="11303" label="P16054 (pp) P48962" source="8412" target="8667" cy:directed="1"/>
      <edge id="11302" label="P16054 (pp) O35643" source="8412" target="8648" cy:directed="1"/>
      <edge id="11301" label="P16054 (pp) Q8BMS1" source="8412" target="8485" cy:directed="1"/>
      <edge id="11300" label="P16054 (pp) P16858" source="8412" target="8528" cy:directed="1"/>
      <edge id="11299" label="P16054 (pp) P47757" source="8412" target="8195" cy:directed="1"/>
      <edge id="11298" label="P62962 (pp) P60710" source="8411" target="8311" cy:directed="1"/>
      <edge id="11297" label="P62962 (pp) P99024" source="8411" target="8536" cy:directed="1"/>
      <edge id="11296" label="P62962 (pp) P39053" source="8411" target="8466" cy:directed="1"/>
      <edge id="11295" label="P62962 (pp) P59999" source="8411" target="8461" cy:directed="1"/>
      <edge id="11294" label="P62962 (pp) Q9JJV2" source="8411" target="8377" cy:directed="1"/>
      <edge id="11293" label="P22315 (pp) Q9Z1J3" source="8409" target="8512" cy:directed="1"/>
      <edge id="11292" label="P22315 (pp) P63038" source="8409" target="8216" cy:directed="1"/>
      <edge id="11291" label="P22315 (pp) Q61102" source="8409" target="8410" cy:directed="1"/>
      <edge id="11290" label="P35486 (pp) Q8BMF4" source="8408" target="8222" cy:directed="1"/>
      <edge id="11289" label="P35486 (pp) Q05920" source="8408" target="8223" cy:directed="1"/>
      <edge id="11288" label="P35486 (pp) P06151" source="8408" target="8207" cy:directed="1"/>
      <edge id="11287" label="P35486 (pp) P09411" source="8408" target="8267" cy:directed="1"/>
      <edge id="11286" label="P35486 (pp) Q9D2G2" source="8408" target="8256" cy:directed="1"/>
      <edge id="11285" label="P35486 (pp) Q922H2" source="8408" target="8660" cy:directed="1"/>
      <edge id="11284" label="P35486 (pp) Q9DC69" source="8408" target="8376" cy:directed="1"/>
      <edge id="11283" label="P35486 (pp) P52480" source="8408" target="8424" cy:directed="1"/>
      <edge id="11282" label="P35486 (pp) P06745" source="8408" target="8433" cy:directed="1"/>
      <edge id="11281" label="P35486 (pp) Q9WUM5" source="8408" target="8245" cy:directed="1"/>
      <edge id="11280" label="P47754 (pp) P62259" source="8406" target="8194" cy:directed="1"/>
      <edge id="11279" label="P47754 (pp) P47757" source="8406" target="8195" cy:directed="1"/>
      <edge id="11278" label="P47754 (pp) P63101" source="8406" target="8448" cy:directed="1"/>
      <edge id="11277" label="P47754 (pp) P16054" source="8406" target="8412" cy:directed="1"/>
      <edge id="11276" label="P14094 (pp) P04925" source="8405" target="8354" cy:directed="1"/>
      <edge id="11275" label="Q99JY9 (pp) Q9JM76" source="8404" target="8347" cy:directed="1"/>
      <edge id="11274" label="Q99JY9 (pp) P59999" source="8404" target="8461" cy:directed="1"/>
      <edge id="11273" label="Q99JY9 (pp) Q60598" source="8404" target="8517" cy:directed="1"/>
      <edge id="11272" label="Q99JY9 (pp) Q8VDN2" source="8404" target="8453" cy:directed="1"/>
      <edge id="11271" label="Q99JY9 (pp) P14094" source="8404" target="8405" cy:directed="1"/>
      <edge id="11270" label="Q99MN9 (pp) Q05920" source="8403" target="8223" cy:directed="1"/>
      <edge id="11269" label="Q99MN9 (pp) Q99JY0" source="8403" target="8353" cy:directed="1"/>
      <edge id="11268" label="Q99MN9 (pp) Q8BWT1" source="8403" target="8280" cy:directed="1"/>
      <edge id="11267" label="Q99MN9 (pp) Q9WUM5" source="8403" target="8245" cy:directed="1"/>
      <edge id="11266" label="Q99MN9 (pp) Q91ZA3" source="8403" target="8446" cy:directed="1"/>
      <edge id="11265" label="Q99MN9 (pp) Q9EQ20" source="8403" target="8331" cy:directed="1"/>
      <edge id="11264" label="Q99PT1 (pp) P84096" source="8402" target="8673" cy:directed="1"/>
      <edge id="11263" label="Q99PT1 (pp) P26040" source="8402" target="8438" cy:directed="1"/>
      <edge id="11262" label="Q99PT1 (pp) P62746" source="8402" target="8529" cy:directed="1"/>
      <edge id="11261" label="Q99PT1 (pp) P63001" source="8402" target="8367" cy:directed="1"/>
      <edge id="11260" label="Q99PT1 (pp) O35465" source="8402" target="8415" cy:directed="1"/>
      <edge id="11259" label="Q99PT1 (pp) P56480" source="8402" target="8227" cy:directed="1"/>
      <edge id="11258" label="O88935 (pp) P39053" source="8400" target="8466" cy:directed="1"/>
      <edge id="11257" label="P97450 (pp) Q9Z1P6" source="8399" target="8268" cy:directed="1"/>
      <edge id="11256" label="P97450 (pp) P48771" source="8399" target="8272" cy:directed="1"/>
      <edge id="11255" label="P97450 (pp) P19783" source="8399" target="8214" cy:directed="1"/>
      <edge id="11254" label="P97450 (pp) Q8K3J1" source="8399" target="8373" cy:directed="1"/>
      <edge id="11253" label="P97450 (pp) Q9CQQ7" source="8399" target="8378" cy:directed="1"/>
      <edge id="11252" label="P97450 (pp) Q99LX0" source="8399" target="8286" cy:directed="1"/>
      <edge id="11251" label="P97450 (pp) Q9DC69" source="8399" target="8376" cy:directed="1"/>
      <edge id="11250" label="P97450 (pp) Q9DB20" source="8399" target="8208" cy:directed="1"/>
      <edge id="11249" label="P97450 (pp) P56391" source="8399" target="8300" cy:directed="1"/>
      <edge id="11248" label="P97450 (pp) Q9DCJ5" source="8399" target="8349" cy:directed="1"/>
      <edge id="11247" label="P97450 (pp) Q9D023" source="8399" target="8385" cy:directed="1"/>
      <edge id="11246" label="P97450 (pp) Q91VD9" source="8399" target="8234" cy:directed="1"/>
      <edge id="11245" label="P97450 (pp) P56480" source="8399" target="8227" cy:directed="1"/>
      <edge id="11244" label="P97450 (pp) Q9CPP6" source="8399" target="8250" cy:directed="1"/>
      <edge id="11243" label="P97450 (pp) Q9CQ54" source="8399" target="8201" cy:directed="1"/>
      <edge id="11242" label="P97450 (pp) O09111" source="8399" target="8180" cy:directed="1"/>
      <edge id="11241" label="P97450 (pp) Q9CQ69" source="8399" target="8203" cy:directed="1"/>
      <edge id="11240" label="P97450 (pp) Q9CQH3" source="8399" target="8209" cy:directed="1"/>
      <edge id="11239" label="P97450 (pp) P19536" source="8399" target="8342" cy:directed="1"/>
      <edge id="11238" label="P97450 (pp) Q8VEM8" source="8399" target="8318" cy:directed="1"/>
      <edge id="11237" label="P97450 (pp) Q9CPQ8" source="8399" target="8233" cy:directed="1"/>
      <edge id="11236" label="P97450 (pp) Q9CR68" source="8399" target="8236" cy:directed="1"/>
      <edge id="11235" label="P97450 (pp) Q91YT0" source="8399" target="8348" cy:directed="1"/>
      <edge id="11234" label="P97450 (pp) Q3UIU2" source="8399" target="8257" cy:directed="1"/>
      <edge id="11233" label="P97450 (pp) Q9D6J5" source="8399" target="8456" cy:directed="1"/>
      <edge id="11232" label="P97450 (pp) Q99LC5" source="8399" target="8284" cy:directed="1"/>
      <edge id="11231" label="P97450 (pp) O88441" source="8399" target="8264" cy:directed="1"/>
      <edge id="11230" label="P97450 (pp) Q9WUM5" source="8399" target="8245" cy:directed="1"/>
      <edge id="11229" label="P97450 (pp) Q9D3D9" source="8399" target="8179" cy:directed="1"/>
      <edge id="11228" label="P97450 (pp) Q60931" source="8399" target="8525" cy:directed="1"/>
      <edge id="11227" label="P97450 (pp) Q9D6J6" source="8399" target="8176" cy:directed="1"/>
      <edge id="11226" label="P97450 (pp) O35658" source="8399" target="8333" cy:directed="1"/>
      <edge id="11225" label="P97450 (pp) Q91VR2" source="8399" target="8232" cy:directed="1"/>
      <edge id="11224" label="P97450 (pp) Q9DCX2" source="8399" target="8335" cy:directed="1"/>
      <edge id="11223" label="P97450 (pp) Q06185" source="8399" target="8240" cy:directed="1"/>
      <edge id="11222" label="P97450 (pp) Q9DB77" source="8399" target="8374" cy:directed="1"/>
      <edge id="11221" label="P97450 (pp) Q9ERS2" source="8399" target="8308" cy:directed="1"/>
      <edge id="11220" label="P97450 (pp) P03930" source="8399" target="8357" cy:directed="1"/>
      <edge id="11219" label="P97450 (pp) Q9CQZ6" source="8399" target="8200" cy:directed="1"/>
      <edge id="11218" label="P97450 (pp) Q03265" source="8399" target="8181" cy:directed="1"/>
      <edge id="11217" label="P97450 (pp) Q99LY9" source="8399" target="8221" cy:directed="1"/>
      <edge id="11216" label="P97450 (pp) Q9DCS9" source="8399" target="8235" cy:directed="1"/>
      <edge id="11215" label="P97450 (pp) Q91VM9" source="8399" target="8375" cy:directed="1"/>
      <edge id="11214" label="Q64010 (pp) P68510" source="8398" target="8182" cy:directed="1"/>
      <edge id="11213" label="Q64010 (pp) P68254" source="8398" target="8549" cy:directed="1"/>
      <edge id="11212" label="Q64010 (pp) P61982" source="8398" target="8478" cy:directed="1"/>
      <edge id="11211" label="Q64010 (pp) P62259" source="8398" target="8194" cy:directed="1"/>
      <edge id="11210" label="Q64010 (pp) P63101" source="8398" target="8448" cy:directed="1"/>
      <edge id="11209" label="Q64010 (pp) P05480" source="8398" target="8313" cy:directed="1"/>
      <edge id="11208" label="P20108 (pp) P63038" source="8396" target="8216" cy:directed="1"/>
      <edge id="11207" label="P20108 (pp) Q9WUM5" source="8396" target="8245" cy:directed="1"/>
      <edge id="11206" label="P20108 (pp) Q99LC5" source="8396" target="8284" cy:directed="1"/>
      <edge id="11205" label="P20108 (pp) Q9DB77" source="8396" target="8374" cy:directed="1"/>
      <edge id="11204" label="Q9QUH0 (pp) O70325" source="8395" target="8271" cy:directed="1"/>
      <edge id="11203" label="Q9QUH0 (pp) P99029" source="8395" target="8325" cy:directed="1"/>
      <edge id="11202" label="Q9QUH0 (pp) P20108" source="8395" target="8396" cy:directed="1"/>
      <edge id="11201" label="Q64521 (pp) Q3ULJ0" source="8394" target="8728" cy:directed="1"/>
      <edge id="11200" label="Q64521 (pp) Q64516" source="8394" target="8452" cy:directed="1"/>
      <edge id="11199" label="P13707 (pp) P17751" source="8393" target="8266" cy:directed="1"/>
      <edge id="11198" label="P13707 (pp) Q64516" source="8393" target="8452" cy:directed="1"/>
      <edge id="11197" label="P13707 (pp) Q64521" source="8393" target="8394" cy:directed="1"/>
      <edge id="11196" label="Q9R0K7 (pp) P04925" source="8392" target="8354" cy:directed="1"/>
      <edge id="11195" label="Q9R0K7 (pp) P12023" source="8392" target="8294" cy:directed="1"/>
      <edge id="11194" label="Q9D898 (pp) P59999" source="8390" target="8461" cy:directed="1"/>
      <edge id="11193" label="P63017 (pp) Q61699" source="8389" target="8687" cy:directed="1"/>
      <edge id="11192" label="P63017 (pp) Q9QYJ0" source="8389" target="8344" cy:directed="1"/>
      <edge id="11191" label="P63017 (pp) P10637" source="8389" target="8503" cy:directed="1"/>
      <edge id="11190" label="P63017 (pp) P07901" source="8389" target="8477" cy:directed="1"/>
      <edge id="11189" label="P63017 (pp) P62259" source="8389" target="8194" cy:directed="1"/>
      <edge id="11188" label="P63017 (pp) P11499" source="8389" target="8289" cy:directed="1"/>
      <edge id="11187" label="P63017 (pp) P63038" source="8389" target="8216" cy:directed="1"/>
      <edge id="11186" label="P63017 (pp) Q60864" source="8389" target="8343" cy:directed="1"/>
      <edge id="11185" label="P63017 (pp) P63037" source="8389" target="8248" cy:directed="1"/>
      <edge id="11184" label="Q61548 (pp) P17427" source="8387" target="8259" cy:directed="1"/>
      <edge id="11183" label="P12367 (pp) D3YVF0" source="8386" target="8759" cy:directed="1"/>
      <edge id="11182" label="P12367 (pp) Q8BR92" source="8386" target="8469" cy:directed="1"/>
      <edge id="11181" label="Q9D023 (pp) Q9CQH3" source="8385" target="8209" cy:directed="1"/>
      <edge id="11180" label="Q9D023 (pp) Q9D6J6" source="8385" target="8176" cy:directed="1"/>
      <edge id="11179" label="Q9D023 (pp) Q99LC5" source="8385" target="8284" cy:directed="1"/>
      <edge id="11178" label="P56379 (pp) Q9DB20" source="8384" target="8208" cy:directed="1"/>
      <edge id="11177" label="P56379 (pp) Q9CPQ8" source="8384" target="8233" cy:directed="1"/>
      <edge id="11176" label="P56379 (pp) Q9CQZ6" source="8384" target="8200" cy:directed="1"/>
      <edge id="11175" label="P56379 (pp) P97450" source="8384" target="8399" cy:directed="1"/>
      <edge id="11174" label="P56379 (pp) Q9D855" source="8384" target="8372" cy:directed="1"/>
      <edge id="11173" label="P56379 (pp) P52503" source="8384" target="8321" cy:directed="1"/>
      <edge id="11172" label="P56379 (pp) Q9CQZ5" source="8384" target="8175" cy:directed="1"/>
      <edge id="11171" label="P56379 (pp) P48771" source="8384" target="8272" cy:directed="1"/>
      <edge id="11170" label="P56379 (pp) Q9CQ69" source="8384" target="8203" cy:directed="1"/>
      <edge id="11169" label="P56379 (pp) Q9Z1P6" source="8384" target="8268" cy:directed="1"/>
      <edge id="11168" label="P56379 (pp) Q06185" source="8384" target="8240" cy:directed="1"/>
      <edge id="11167" label="P56379 (pp) Q9CQH3" source="8384" target="8209" cy:directed="1"/>
      <edge id="11166" label="P18052 (pp) P05480" source="8383" target="8313" cy:directed="1"/>
      <edge id="11165" label="P18052 (pp) P43406" source="8383" target="8665" cy:directed="1"/>
      <edge id="11164" label="P70232 (pp) P18052" source="8382" target="8383" cy:directed="1"/>
      <edge id="11163" label="Q9CZS1 (pp) P61922" source="8381" target="8293" cy:directed="1"/>
      <edge id="11162" label="Q9CZS1 (pp) Q8CHT0" source="8381" target="8471" cy:directed="1"/>
      <edge id="11161" label="Q9CZS1 (pp) Q9EQ20" source="8381" target="8331" cy:directed="1"/>
      <edge id="11160" label="O35129 (pp) O35658" source="8380" target="8333" cy:directed="1"/>
      <edge id="11159" label="O35129 (pp) P63038" source="8380" target="8216" cy:directed="1"/>
      <edge id="11158" label="O35129 (pp) Q9D0M3" source="8380" target="8219" cy:directed="1"/>
      <edge id="11157" label="O35129 (pp) Q99LX0" source="8380" target="8286" cy:directed="1"/>
      <edge id="11156" label="O35129 (pp) P67778" source="8380" target="8230" cy:directed="1"/>
      <edge id="11155" label="O35129 (pp) Q9DCT2" source="8380" target="8202" cy:directed="1"/>
      <edge id="11154" label="O35129 (pp) Q9CZ13" source="8380" target="8218" cy:directed="1"/>
      <edge id="11153" label="O35129 (pp) Q8BGH2" source="8380" target="8285" cy:directed="1"/>
      <edge id="11152" label="O35129 (pp) P62073" source="8380" target="8324" cy:directed="1"/>
      <edge id="11151" label="O88696 (pp) Q9CQA3" source="8379" target="8281" cy:directed="1"/>
      <edge id="11150" label="O88696 (pp) Q8K3J1" source="8379" target="8373" cy:directed="1"/>
      <edge id="11149" label="O88696 (pp) P97807" source="8379" target="8309" cy:directed="1"/>
      <edge id="11148" label="O88696 (pp) P56480" source="8379" target="8227" cy:directed="1"/>
      <edge id="11147" label="O88696 (pp) Q9CZ13" source="8379" target="8218" cy:directed="1"/>
      <edge id="11146" label="O88696 (pp) Q99LX0" source="8379" target="8286" cy:directed="1"/>
      <edge id="11145" label="O88696 (pp) Q9Z1P6" source="8379" target="8268" cy:directed="1"/>
      <edge id="11144" label="O88696 (pp) P67778" source="8379" target="8230" cy:directed="1"/>
      <edge id="11143" label="O88696 (pp) Q9DCT2" source="8379" target="8202" cy:directed="1"/>
      <edge id="11142" label="O88696 (pp) Q8CGK3" source="8379" target="8727" cy:directed="1"/>
      <edge id="11141" label="O88696 (pp) P17751" source="8379" target="8266" cy:directed="1"/>
      <edge id="11140" label="O88696 (pp) Q91Z53" source="8379" target="8304" cy:directed="1"/>
      <edge id="11139" label="O88696 (pp) P52503" source="8379" target="8321" cy:directed="1"/>
      <edge id="11138" label="O88696 (pp) O08756" source="8379" target="8352" cy:directed="1"/>
      <edge id="11137" label="O88696 (pp) Q91YT0" source="8379" target="8348" cy:directed="1"/>
      <edge id="11136" label="O88696 (pp) P42125" source="8379" target="8488" cy:directed="1"/>
      <edge id="11135" label="O88696 (pp) Q8BGH2" source="8379" target="8285" cy:directed="1"/>
      <edge id="11134" label="O88696 (pp) Q9DC70" source="8379" target="8241" cy:directed="1"/>
      <edge id="11133" label="O88696 (pp) Q9D3D9" source="8379" target="8179" cy:directed="1"/>
      <edge id="11132" label="O88696 (pp) Q9D6J6" source="8379" target="8176" cy:directed="1"/>
      <edge id="11131" label="O88696 (pp) P63038" source="8379" target="8216" cy:directed="1"/>
      <edge id="11130" label="O88696 (pp) Q9DB20" source="8379" target="8208" cy:directed="1"/>
      <edge id="11129" label="O88696 (pp) Q9D0M3" source="8379" target="8219" cy:directed="1"/>
      <edge id="11128" label="O88696 (pp) O35129" source="8379" target="8380" cy:directed="1"/>
      <edge id="11127" label="Q9CQQ7 (pp) Q9D3D9" source="8378" target="8179" cy:directed="1"/>
      <edge id="11126" label="Q9CQQ7 (pp) Q9ERS2" source="8378" target="8308" cy:directed="1"/>
      <edge id="11125" label="Q9CQQ7 (pp) Q9D6J6" source="8378" target="8176" cy:directed="1"/>
      <edge id="11124" label="Q9CQQ7 (pp) Q3UIU2" source="8378" target="8257" cy:directed="1"/>
      <edge id="11123" label="Q9CQQ7 (pp) Q91VR2" source="8378" target="8232" cy:directed="1"/>
      <edge id="11122" label="Q9CQQ7 (pp) Q99LY9" source="8378" target="8221" cy:directed="1"/>
      <edge id="11121" label="Q9CQQ7 (pp) Q9CQH3" source="8378" target="8209" cy:directed="1"/>
      <edge id="11120" label="Q9JJV2 (pp) O88935" source="8377" target="8400" cy:directed="1"/>
      <edge id="11119" label="Q9JJV2 (pp) P39053" source="8377" target="8466" cy:directed="1"/>
      <edge id="11118" label="Q9JJV2 (pp) Q9QXS6" source="8377" target="8508" cy:directed="1"/>
      <edge id="11117" label="Q9JJV2 (pp) P60710" source="8377" target="8311" cy:directed="1"/>
      <edge id="11116" label="Q9DC69 (pp) Q9ERS2" source="8376" target="8308" cy:directed="1"/>
      <edge id="11115" label="Q9DC69 (pp) Q99LX0" source="8376" target="8286" cy:directed="1"/>
      <edge id="11114" label="Q9DC69 (pp) Q9CQH3" source="8376" target="8209" cy:directed="1"/>
      <edge id="11113" label="Q9DC69 (pp) Q9DCX2" source="8376" target="8335" cy:directed="1"/>
      <edge id="11112" label="Q9DC69 (pp) Q9D6J6" source="8376" target="8176" cy:directed="1"/>
      <edge id="11111" label="Q9DC69 (pp) P99029" source="8376" target="8325" cy:directed="1"/>
      <edge id="11110" label="Q9DC69 (pp) Q9D3D9" source="8376" target="8179" cy:directed="1"/>
      <edge id="11109" label="Q9DC69 (pp) Q9CQQ7" source="8376" target="8378" cy:directed="1"/>
      <edge id="11108" label="Q9DC69 (pp) O09111" source="8376" target="8180" cy:directed="1"/>
      <edge id="11107" label="Q9DC69 (pp) Q91VR2" source="8376" target="8232" cy:directed="1"/>
      <edge id="11106" label="Q91VM9 (pp) Q99LC5" source="8375" target="8284" cy:directed="1"/>
      <edge id="11105" label="Q91VM9 (pp) P63082" source="8375" target="8417" cy:directed="1"/>
      <edge id="11104" label="Q91VM9 (pp) Q9CQQ7" source="8375" target="8378" cy:directed="1"/>
      <edge id="11103" label="Q9DB77 (pp) P00405" source="8374" target="8638" cy:directed="1"/>
      <edge id="11102" label="Q9DB77 (pp) Q8VEM8" source="8374" target="8318" cy:directed="1"/>
      <edge id="11101" label="Q9DB77 (pp) Q9D6J6" source="8374" target="8176" cy:directed="1"/>
      <edge id="11100" label="Q9DB77 (pp) Q9ERS2" source="8374" target="8308" cy:directed="1"/>
      <edge id="11099" label="Q9DB77 (pp) Q99LY9" source="8374" target="8221" cy:directed="1"/>
      <edge id="11098" label="Q9DB77 (pp) Q9DCX2" source="8374" target="8335" cy:directed="1"/>
      <edge id="11097" label="Q9DB77 (pp) Q9CQQ7" source="8374" target="8378" cy:directed="1"/>
      <edge id="11096" label="Q9DB77 (pp) Q9DCS9" source="8374" target="8235" cy:directed="1"/>
      <edge id="11095" label="Q9DB77 (pp) Q9DCJ5" source="8374" target="8349" cy:directed="1"/>
      <edge id="11094" label="Q9DB77 (pp) Q9CR68" source="8374" target="8236" cy:directed="1"/>
      <edge id="11093" label="Q9DB77 (pp) O09111" source="8374" target="8180" cy:directed="1"/>
      <edge id="11092" label="Q9DB77 (pp) Q99P72" source="8374" target="8647" cy:directed="1"/>
      <edge id="11091" label="Q9DB77 (pp) Q3UIU2" source="8374" target="8257" cy:directed="1"/>
      <edge id="11090" label="Q9DB77 (pp) Q99JY0" source="8374" target="8353" cy:directed="1"/>
      <edge id="11089" label="Q9DB77 (pp) Q91VR2" source="8374" target="8232" cy:directed="1"/>
      <edge id="11088" label="Q9DB77 (pp) Q99LC5" source="8374" target="8284" cy:directed="1"/>
      <edge id="11087" label="Q9DB77 (pp) P19783" source="8374" target="8214" cy:directed="1"/>
      <edge id="11086" label="Q9DB77 (pp) P68510" source="8374" target="8182" cy:directed="1"/>
      <edge id="11085" label="Q9DB77 (pp) Q9CQ69" source="8374" target="8203" cy:directed="1"/>
      <edge id="11084" label="Q9DB77 (pp) Q9WUM5" source="8374" target="8245" cy:directed="1"/>
      <edge id="11083" label="Q9DB77 (pp) Q9DC69" source="8374" target="8376" cy:directed="1"/>
      <edge id="11082" label="Q9DB77 (pp) Q91YT0" source="8374" target="8348" cy:directed="1"/>
      <edge id="11081" label="Q9DB77 (pp) Q9CQH3" source="8374" target="8209" cy:directed="1"/>
      <edge id="11080" label="Q8K3J1 (pp) Q91VR2" source="8373" target="8232" cy:directed="1"/>
      <edge id="11079" label="Q8K3J1 (pp) Q9D6J6" source="8373" target="8176" cy:directed="1"/>
      <edge id="11078" label="Q8K3J1 (pp) Q9DC69" source="8373" target="8376" cy:directed="1"/>
      <edge id="11077" label="Q8K3J1 (pp) P56391" source="8373" target="8300" cy:directed="1"/>
      <edge id="11076" label="Q8K3J1 (pp) Q9DCX2" source="8373" target="8335" cy:directed="1"/>
      <edge id="11075" label="Q8K3J1 (pp) Q9CQH3" source="8373" target="8209" cy:directed="1"/>
      <edge id="11074" label="Q8K3J1 (pp) Q9CQQ7" source="8373" target="8378" cy:directed="1"/>
      <edge id="11073" label="Q8K3J1 (pp) Q9ERS2" source="8373" target="8308" cy:directed="1"/>
      <edge id="11072" label="Q8K3J1 (pp) Q9D3D9" source="8373" target="8179" cy:directed="1"/>
      <edge id="11071" label="Q8K3J1 (pp) O09111" source="8373" target="8180" cy:directed="1"/>
      <edge id="11070" label="Q8K3J1 (pp) Q99LX0" source="8373" target="8286" cy:directed="1"/>
      <edge id="11069" label="Q8K3J1 (pp) Q3UIU2" source="8373" target="8257" cy:directed="1"/>
      <edge id="11068" label="Q9D855 (pp) Q9CQH3" source="8372" target="8209" cy:directed="1"/>
      <edge id="11067" label="Q9D855 (pp) Q03265" source="8372" target="8181" cy:directed="1"/>
      <edge id="11066" label="Q9D855 (pp) P43024" source="8372" target="8441" cy:directed="1"/>
      <edge id="11065" label="Q9D855 (pp) Q91YT0" source="8372" target="8348" cy:directed="1"/>
      <edge id="11064" label="Q9D855 (pp) Q8K2B3" source="8372" target="8316" cy:directed="1"/>
      <edge id="11063" label="Q9D855 (pp) Q9ERS2" source="8372" target="8308" cy:directed="1"/>
      <edge id="11062" label="Q9D855 (pp) Q9CQQ7" source="8372" target="8378" cy:directed="1"/>
      <edge id="11061" label="Q9D855 (pp) Q9CZ13" source="8372" target="8218" cy:directed="1"/>
      <edge id="11060" label="Q9D855 (pp) P97450" source="8372" target="8399" cy:directed="1"/>
      <edge id="11059" label="Q9D855 (pp) Q9D0M3" source="8372" target="8219" cy:directed="1"/>
      <edge id="11058" label="Q9D855 (pp) Q91VD9" source="8372" target="8234" cy:directed="1"/>
      <edge id="11057" label="Q9D855 (pp) Q9DCJ5" source="8372" target="8349" cy:directed="1"/>
      <edge id="11056" label="Q9D855 (pp) Q99LY9" source="8372" target="8221" cy:directed="1"/>
      <edge id="11055" label="Q9D855 (pp) Q9CR68" source="8372" target="8236" cy:directed="1"/>
      <edge id="11054" label="Q9D855 (pp) Q9DB20" source="8372" target="8208" cy:directed="1"/>
      <edge id="11053" label="Q9D855 (pp) Q9DC69" source="8372" target="8376" cy:directed="1"/>
      <edge id="11052" label="Q9D855 (pp) Q9DB77" source="8372" target="8374" cy:directed="1"/>
      <edge id="11051" label="Q9D855 (pp) Q9CPP6" source="8372" target="8250" cy:directed="1"/>
      <edge id="11050" label="Q9D855 (pp) P56391" source="8372" target="8300" cy:directed="1"/>
      <edge id="11049" label="Q9D855 (pp) Q06185" source="8372" target="8240" cy:directed="1"/>
      <edge id="11048" label="Q9D855 (pp) Q9CQZ6" source="8372" target="8200" cy:directed="1"/>
      <edge id="11047" label="Q9D855 (pp) Q9D023" source="8372" target="8385" cy:directed="1"/>
      <edge id="11046" label="Q9D855 (pp) Q9DCS9" source="8372" target="8235" cy:directed="1"/>
      <edge id="11045" label="Q9D855 (pp) P97807" source="8372" target="8309" cy:directed="1"/>
      <edge id="11044" label="Q9D855 (pp) P52503" source="8372" target="8321" cy:directed="1"/>
      <edge id="11043" label="Q9D855 (pp) Q3UIU2" source="8372" target="8257" cy:directed="1"/>
      <edge id="11042" label="Q9D855 (pp) Q9CQ69" source="8372" target="8203" cy:directed="1"/>
      <edge id="11041" label="Q9D855 (pp) Q9D6J6" source="8372" target="8176" cy:directed="1"/>
      <edge id="11040" label="Q9D855 (pp) Q9CQJ8" source="8372" target="8239" cy:directed="1"/>
      <edge id="11039" label="Q9D855 (pp) Q9D3D9" source="8372" target="8179" cy:directed="1"/>
      <edge id="11038" label="Q9D855 (pp) Q9CQZ5" source="8372" target="8175" cy:directed="1"/>
      <edge id="11037" label="Q9D855 (pp) Q91VR2" source="8372" target="8232" cy:directed="1"/>
      <edge id="11036" label="Q9D855 (pp) Q9DCX2" source="8372" target="8335" cy:directed="1"/>
      <edge id="11035" label="Q9D855 (pp) Q8K3J1" source="8372" target="8373" cy:directed="1"/>
      <edge id="11034" label="Q9JHU4 (pp) Q8BPN8" source="8371" target="8416" cy:directed="1"/>
      <edge id="11033" label="Q9JHU4 (pp) P63005" source="8371" target="8275" cy:directed="1"/>
      <edge id="11032" label="Q9JHU4 (pp) P07901" source="8371" target="8477" cy:directed="1"/>
      <edge id="11031" label="Q9JHU4 (pp) O08788" source="8371" target="8306" cy:directed="1"/>
      <edge id="11030" label="Q9JHU4 (pp) P68369" source="8371" target="8317" cy:directed="1"/>
      <edge id="11029" label="Q9JHU4 (pp) P63101" source="8371" target="8448" cy:directed="1"/>
      <edge id="11028" label="Q9JHU4 (pp) P68368" source="8371" target="8501" cy:directed="1"/>
      <edge id="11027" label="Q9JHU4 (pp) Q9DC28" source="8371" target="8621" cy:directed="1"/>
      <edge id="11026" label="Q9JHU4 (pp) Q99KJ8" source="8371" target="8305" cy:directed="1"/>
      <edge id="11025" label="Q9JHU4 (pp) Q60996" source="8371" target="8555" cy:directed="1"/>
      <edge id="11024" label="P46660 (pp) P19246" source="8370" target="8627" cy:directed="1"/>
      <edge id="11023" label="P46660 (pp) P35438" source="8370" target="8184" cy:directed="1"/>
      <edge id="11022" label="P63044 (pp) P35802" source="8369" target="8775" cy:directed="1"/>
      <edge id="11021" label="P63044 (pp) P51863" source="8369" target="8192" cy:directed="1"/>
      <edge id="11020" label="P63044 (pp) P18872" source="8369" target="8359" cy:directed="1"/>
      <edge id="11019" label="P63044 (pp) Q6PIE5" source="8369" target="8543" cy:directed="1"/>
      <edge id="11018" label="P63044 (pp) O35526" source="8369" target="8298" cy:directed="1"/>
      <edge id="11017" label="P63044 (pp) P62874" source="8369" target="8330" cy:directed="1"/>
      <edge id="11016" label="P63044 (pp) Q99LX0" source="8369" target="8286" cy:directed="1"/>
      <edge id="11015" label="P63044 (pp) P39053" source="8369" target="8466" cy:directed="1"/>
      <edge id="11014" label="P63044 (pp) Q6PIC6" source="8369" target="8602" cy:directed="1"/>
      <edge id="11013" label="P63044 (pp) P28663" source="8369" target="8599" cy:directed="1"/>
      <edge id="11012" label="P63044 (pp) O55042" source="8369" target="8585" cy:directed="1"/>
      <edge id="11011" label="P63044 (pp) P60766" source="8369" target="8496" cy:directed="1"/>
      <edge id="11010" label="Q62351 (pp) Q68FD5" source="8368" target="8345" cy:directed="1"/>
      <edge id="11009" label="Q62351 (pp) Q91VZ6" source="8368" target="8607" cy:directed="1"/>
      <edge id="11008" label="P63001 (pp) P35438" source="8367" target="8184" cy:directed="1"/>
      <edge id="11007" label="P63001 (pp) P60766" source="8367" target="8496" cy:directed="1"/>
      <edge id="11006" label="P63001 (pp) Q5FWK3" source="8367" target="8459" cy:directed="1"/>
      <edge id="11005" label="Q8BG51 (pp) P84096" source="8366" target="8673" cy:directed="1"/>
      <edge id="11004" label="Q8BG51 (pp) Q5FWK3" source="8366" target="8459" cy:directed="1"/>
      <edge id="11003" label="Q8BG51 (pp) P63001" source="8366" target="8367" cy:directed="1"/>
      <edge id="11002" label="Q9CXZ1 (pp) Q9D6J6" source="8365" target="8176" cy:directed="1"/>
      <edge id="11001" label="Q9CXZ1 (pp) Q91VD9" source="8365" target="8234" cy:directed="1"/>
      <edge id="11000" label="Q9CXZ1 (pp) Q9DC69" source="8365" target="8376" cy:directed="1"/>
      <edge id="10999" label="Q9CXZ1 (pp) Q9DCS9" source="8365" target="8235" cy:directed="1"/>
      <edge id="10998" label="Q9CXZ1 (pp) Q9CQ69" source="8365" target="8203" cy:directed="1"/>
      <edge id="10997" label="Q9CXZ1 (pp) Q8K3J1" source="8365" target="8373" cy:directed="1"/>
      <edge id="10996" label="Q9CXZ1 (pp) Q9ERS2" source="8365" target="8308" cy:directed="1"/>
      <edge id="10995" label="Q9CXZ1 (pp) Q3UIU2" source="8365" target="8257" cy:directed="1"/>
      <edge id="10994" label="Q9CXZ1 (pp) O09111" source="8365" target="8180" cy:directed="1"/>
      <edge id="10993" label="Q9CXZ1 (pp) Q9D0M3" source="8365" target="8219" cy:directed="1"/>
      <edge id="10992" label="Q9CXZ1 (pp) Q9Z1P6" source="8365" target="8268" cy:directed="1"/>
      <edge id="10991" label="Q9CXZ1 (pp) Q9CQJ8" source="8365" target="8239" cy:directed="1"/>
      <edge id="10990" label="Q9CXZ1 (pp) Q62425" source="8365" target="8514" cy:directed="1"/>
      <edge id="10989" label="Q9CXZ1 (pp) Q91YT0" source="8365" target="8348" cy:directed="1"/>
      <edge id="10988" label="Q9CXZ1 (pp) Q9CR68" source="8365" target="8236" cy:directed="1"/>
      <edge id="10987" label="Q9CXZ1 (pp) Q99LY9" source="8365" target="8221" cy:directed="1"/>
      <edge id="10986" label="Q9CXZ1 (pp) Q9DCJ5" source="8365" target="8349" cy:directed="1"/>
      <edge id="10985" label="Q9CXZ1 (pp) Q9CQQ7" source="8365" target="8378" cy:directed="1"/>
      <edge id="10984" label="Q9CXZ1 (pp) Q9CQH3" source="8365" target="8209" cy:directed="1"/>
      <edge id="10983" label="Q9CXZ1 (pp) Q9D6J5" source="8365" target="8456" cy:directed="1"/>
      <edge id="10982" label="Q9CXZ1 (pp) P97450" source="8365" target="8399" cy:directed="1"/>
      <edge id="10981" label="Q9CXZ1 (pp) Q9DB77" source="8365" target="8374" cy:directed="1"/>
      <edge id="10980" label="Q9CXZ1 (pp) Q9CQZ6" source="8365" target="8200" cy:directed="1"/>
      <edge id="10979" label="Q9CXZ1 (pp) Q9CQ54" source="8365" target="8201" cy:directed="1"/>
      <edge id="10978" label="Q9CXZ1 (pp) Q99LC3" source="8365" target="8220" cy:directed="1"/>
      <edge id="10977" label="Q9CXZ1 (pp) Q9CQC7" source="8365" target="8463" cy:directed="1"/>
      <edge id="10976" label="Q9CXZ1 (pp) Q9CQZ5" source="8365" target="8175" cy:directed="1"/>
      <edge id="10975" label="Q9CXZ1 (pp) Q9CPP6" source="8365" target="8250" cy:directed="1"/>
      <edge id="10974" label="Q60676 (pp) P35438" source="8364" target="8184" cy:directed="1"/>
      <edge id="10973" label="Q60676 (pp) P63330" source="8364" target="8198" cy:directed="1"/>
      <edge id="10972" label="Q8JZN5 (pp) Q61425" source="8363" target="8283" cy:directed="1"/>
      <edge id="10971" label="Q8JZN5 (pp) Q8BMS1" source="8363" target="8485" cy:directed="1"/>
      <edge id="10970" label="Q8JZN5 (pp) Q99LC5" source="8363" target="8284" cy:directed="1"/>
      <edge id="10969" label="Q8JZQ2 (pp) P63038" source="8362" target="8216" cy:directed="1"/>
      <edge id="10968" label="Q8JZQ2 (pp) P00493" source="8362" target="8569" cy:directed="1"/>
      <edge id="10967" label="Q8JZQ2 (pp) Q68FF6" source="8362" target="8552" cy:directed="1"/>
      <edge id="10966" label="P51174 (pp) Q99LC5" source="8361" target="8284" cy:directed="1"/>
      <edge id="10965" label="P51174 (pp) Q8BMS1" source="8361" target="8485" cy:directed="1"/>
      <edge id="10964" label="P51174 (pp) Q91WC3" source="8361" target="8591" cy:directed="1"/>
      <edge id="10963" label="P51174 (pp) Q8BWT1" source="8361" target="8280" cy:directed="1"/>
      <edge id="10962" label="P51174 (pp) Q921G7" source="8361" target="8279" cy:directed="1"/>
      <edge id="10961" label="P51174 (pp) P41216" source="8361" target="8597" cy:directed="1"/>
      <edge id="10960" label="P51174 (pp) Q61425" source="8361" target="8283" cy:directed="1"/>
      <edge id="10959" label="P51174 (pp) Q8BGD5" source="8361" target="8487" cy:directed="1"/>
      <edge id="10958" label="P51174 (pp) Q99JY0" source="8361" target="8353" cy:directed="1"/>
      <edge id="10957" label="Q8VDD5 (pp) P35438" source="8360" target="8184" cy:directed="1"/>
      <edge id="10956" label="Q8VDD5 (pp) P63101" source="8360" target="8448" cy:directed="1"/>
      <edge id="10955" label="Q8VDD5 (pp) Q01097" source="8360" target="8173" cy:directed="1"/>
      <edge id="10954" label="P18872 (pp) P12023" source="8359" target="8294" cy:directed="1"/>
      <edge id="10953" label="P18872 (pp) P62874" source="8359" target="8330" cy:directed="1"/>
      <edge id="10952" label="P18872 (pp) P06151" source="8359" target="8207" cy:directed="1"/>
      <edge id="10951" label="Q9CQ75 (pp) Q9CPP6" source="8358" target="8250" cy:directed="1"/>
      <edge id="10950" label="Q9CQ75 (pp) Q91VD9" source="8358" target="8234" cy:directed="1"/>
      <edge id="10949" label="Q9CQ75 (pp) Q9CQJ8" source="8358" target="8239" cy:directed="1"/>
      <edge id="10948" label="Q9CQ75 (pp) Q8K3J1" source="8358" target="8373" cy:directed="1"/>
      <edge id="10947" label="Q9CQ75 (pp) Q9CQZ5" source="8358" target="8175" cy:directed="1"/>
      <edge id="10946" label="Q9CQ75 (pp) Q9DC69" source="8358" target="8376" cy:directed="1"/>
      <edge id="10945" label="Q9CQ75 (pp) Q9CPQ1" source="8358" target="8573" cy:directed="1"/>
      <edge id="10944" label="Q9CQ75 (pp) Q9D3D9" source="8358" target="8179" cy:directed="1"/>
      <edge id="10943" label="Q9CQ75 (pp) Q9D6J6" source="8358" target="8176" cy:directed="1"/>
      <edge id="10942" label="Q9CQ75 (pp) Q9CXZ1" source="8358" target="8365" cy:directed="1"/>
      <edge id="10941" label="Q9CQ75 (pp) Q7TMF3" source="8358" target="8334" cy:directed="1"/>
      <edge id="10940" label="Q9CQ75 (pp) Q9D6J5" source="8358" target="8456" cy:directed="1"/>
      <edge id="10939" label="Q9CQ75 (pp) Q99LC3" source="8358" target="8220" cy:directed="1"/>
      <edge id="10938" label="Q9CQ75 (pp) Q3UIU2" source="8358" target="8257" cy:directed="1"/>
      <edge id="10937" label="Q9CQ75 (pp) Q9CR68" source="8358" target="8236" cy:directed="1"/>
      <edge id="10936" label="Q9CQ75 (pp) Q9ERS2" source="8358" target="8308" cy:directed="1"/>
      <edge id="10935" label="Q9CQ75 (pp) P43024" source="8358" target="8441" cy:directed="1"/>
      <edge id="10934" label="Q9CQ75 (pp) Q62425" source="8358" target="8514" cy:directed="1"/>
      <edge id="10933" label="Q9CQ75 (pp) Q9CQH3" source="8358" target="8209" cy:directed="1"/>
      <edge id="10932" label="Q9CQ75 (pp) Q9D0M3" source="8358" target="8219" cy:directed="1"/>
      <edge id="10931" label="Q9CQ75 (pp) Q9Z1P6" source="8358" target="8268" cy:directed="1"/>
      <edge id="10930" label="Q9CQ75 (pp) P56391" source="8358" target="8300" cy:directed="1"/>
      <edge id="10929" label="Q9CQ75 (pp) Q9CQ69" source="8358" target="8203" cy:directed="1"/>
      <edge id="10928" label="Q9CQ75 (pp) Q9DCX2" source="8358" target="8335" cy:directed="1"/>
      <edge id="10927" label="Q9CQ75 (pp) Q9CQZ6" source="8358" target="8200" cy:directed="1"/>
      <edge id="10926" label="Q9CQ75 (pp) Q99LY9" source="8358" target="8221" cy:directed="1"/>
      <edge id="10925" label="Q9CQ75 (pp) Q9DCJ5" source="8358" target="8349" cy:directed="1"/>
      <edge id="10924" label="Q9CQ75 (pp) Q9CQ54" source="8358" target="8201" cy:directed="1"/>
      <edge id="10923" label="Q9CQ75 (pp) Q9CQC7" source="8358" target="8463" cy:directed="1"/>
      <edge id="10922" label="Q9CQ75 (pp) O09111" source="8358" target="8180" cy:directed="1"/>
      <edge id="10921" label="Q9CQ75 (pp) Q9DCS9" source="8358" target="8235" cy:directed="1"/>
      <edge id="10920" label="Q9CQ75 (pp) P97450" source="8358" target="8399" cy:directed="1"/>
      <edge id="10919" label="Q9CQ75 (pp) Q9D855" source="8358" target="8372" cy:directed="1"/>
      <edge id="10918" label="Q9CQ75 (pp) Q9DB20" source="8358" target="8208" cy:directed="1"/>
      <edge id="10917" label="Q9CQ75 (pp) Q91YT0" source="8358" target="8348" cy:directed="1"/>
      <edge id="10916" label="Q9CQ75 (pp) P52503" source="8358" target="8321" cy:directed="1"/>
      <edge id="10915" label="Q9CQ75 (pp) Q9DC70" source="8358" target="8241" cy:directed="1"/>
      <edge id="10914" label="P03930 (pp) Q9CQQ7" source="8357" target="8378" cy:directed="1"/>
      <edge id="10913" label="P03930 (pp) Q91VR2" source="8357" target="8232" cy:directed="1"/>
      <edge id="10912" label="P03930 (pp) Q9D3D9" source="8357" target="8179" cy:directed="1"/>
      <edge id="10911" label="P49615 (pp) P19246" source="8356" target="8627" cy:directed="1"/>
      <edge id="10910" label="P39688 (pp) Q60631" source="8355" target="8322" cy:directed="1"/>
      <edge id="10909" label="P39688 (pp) P30999" source="8355" target="8553" cy:directed="1"/>
      <edge id="10908" label="P39688 (pp) P18052" source="8355" target="8383" cy:directed="1"/>
      <edge id="10907" label="P39688 (pp) P49615" source="8355" target="8356" cy:directed="1"/>
      <edge id="10906" label="P04925 (pp) P62259" source="8354" target="8194" cy:directed="1"/>
      <edge id="10905" label="P04925 (pp) O35136" source="8354" target="8690" cy:directed="1"/>
      <edge id="10904" label="P04925 (pp) P11627" source="8354" target="8530" cy:directed="1"/>
      <edge id="10903" label="P04925 (pp) O08599" source="8354" target="8643" cy:directed="1"/>
      <edge id="10902" label="P04925 (pp) P63101" source="8354" target="8448" cy:directed="1"/>
      <edge id="10901" label="P04925 (pp) O88935" source="8354" target="8400" cy:directed="1"/>
      <edge id="10900" label="P04925 (pp) Q99PJ0" source="8354" target="8595" cy:directed="1"/>
      <edge id="10899" label="P04925 (pp) Q99N28" source="8354" target="8341" cy:directed="1"/>
      <edge id="10898" label="P04925 (pp) Q9Z218" source="8354" target="8537" cy:directed="1"/>
      <edge id="10897" label="P04925 (pp) Q8VDN2" source="8354" target="8453" cy:directed="1"/>
      <edge id="10896" label="Q99JY0 (pp) Q8BMS1" source="8353" target="8485" cy:directed="1"/>
      <edge id="10895" label="Q99JY0 (pp) Q9DBL1" source="8353" target="8420" cy:directed="1"/>
      <edge id="10894" label="O08756 (pp) Q8BMS1" source="8352" target="8485" cy:directed="1"/>
      <edge id="10893" label="O08756 (pp) Q9CQH3" source="8352" target="8209" cy:directed="1"/>
      <edge id="10892" label="O08756 (pp) O09111" source="8352" target="8180" cy:directed="1"/>
      <edge id="10891" label="O08756 (pp) Q99JY0" source="8352" target="8353" cy:directed="1"/>
      <edge id="10890" label="P28660 (pp) Q9JJV2" source="8351" target="8377" cy:directed="1"/>
      <edge id="10889" label="P60879 (pp) P63017" source="8350" target="8389" cy:directed="1"/>
      <edge id="10888" label="P60879 (pp) O55042" source="8350" target="8585" cy:directed="1"/>
      <edge id="10887" label="P60879 (pp) Q8K400" source="8350" target="8766" cy:directed="1"/>
      <edge id="10886" label="P60879 (pp) P63040" source="8350" target="8430" cy:directed="1"/>
      <edge id="10885" label="P60879 (pp) P61264" source="8350" target="8436" cy:directed="1"/>
      <edge id="10884" label="P60879 (pp) O08599" source="8350" target="8643" cy:directed="1"/>
      <edge id="10883" label="P60879 (pp) Q7TSJ2" source="8350" target="8689" cy:directed="1"/>
      <edge id="10882" label="P60879 (pp) P68368" source="8350" target="8501" cy:directed="1"/>
      <edge id="10881" label="P60879 (pp) P16858" source="8350" target="8528" cy:directed="1"/>
      <edge id="10880" label="P60879 (pp) Q9QWI6" source="8350" target="8449" cy:directed="1"/>
      <edge id="10879" label="P60879 (pp) P46096" source="8350" target="8659" cy:directed="1"/>
      <edge id="10878" label="P60879 (pp) P17426" source="8350" target="8260" cy:directed="1"/>
      <edge id="10877" label="P60879 (pp) Q62442" source="8350" target="8302" cy:directed="1"/>
      <edge id="10876" label="P60879 (pp) P47708" source="8350" target="8623" cy:directed="1"/>
      <edge id="10875" label="P60879 (pp) P63044" source="8350" target="8369" cy:directed="1"/>
      <edge id="10874" label="P60879 (pp) P51863" source="8350" target="8192" cy:directed="1"/>
      <edge id="10873" label="P60879 (pp) P06837" source="8350" target="8476" cy:directed="1"/>
      <edge id="10872" label="P60879 (pp) P28660" source="8350" target="8351" cy:directed="1"/>
      <edge id="10871" label="Q9DCJ5 (pp) O09111" source="8349" target="8180" cy:directed="1"/>
      <edge id="10870" label="Q9DCJ5 (pp) P56391" source="8349" target="8300" cy:directed="1"/>
      <edge id="10869" label="Q9DCJ5 (pp) Q99LY9" source="8349" target="8221" cy:directed="1"/>
      <edge id="10868" label="Q9DCJ5 (pp) Q91VR2" source="8349" target="8232" cy:directed="1"/>
      <edge id="10867" label="Q9DCJ5 (pp) Q9D6J6" source="8349" target="8176" cy:directed="1"/>
      <edge id="10866" label="Q9DCJ5 (pp) P99029" source="8349" target="8325" cy:directed="1"/>
      <edge id="10865" label="Q9DCJ5 (pp) O08756" source="8349" target="8352" cy:directed="1"/>
      <edge id="10864" label="Q9DCJ5 (pp) Q99LX0" source="8349" target="8286" cy:directed="1"/>
      <edge id="10863" label="Q9DCJ5 (pp) P67778" source="8349" target="8230" cy:directed="1"/>
      <edge id="10862" label="Q9DCJ5 (pp) Q9DCX2" source="8349" target="8335" cy:directed="1"/>
      <edge id="10861" label="Q9DCJ5 (pp) Q9CQH3" source="8349" target="8209" cy:directed="1"/>
      <edge id="10860" label="Q9DCJ5 (pp) Q9CPQ8" source="8349" target="8233" cy:directed="1"/>
      <edge id="10859" label="Q9DCJ5 (pp) Q9ERS2" source="8349" target="8308" cy:directed="1"/>
      <edge id="10858" label="Q9DCJ5 (pp) Q9CQQ7" source="8349" target="8378" cy:directed="1"/>
      <edge id="10857" label="Q9DCJ5 (pp) Q9DC69" source="8349" target="8376" cy:directed="1"/>
      <edge id="10856" label="Q9DCJ5 (pp) Q9D3D9" source="8349" target="8179" cy:directed="1"/>
      <edge id="10855" label="Q9DCJ5 (pp) Q3UIU2" source="8349" target="8257" cy:directed="1"/>
      <edge id="10854" label="Q9DCJ5 (pp) Q8K3J1" source="8349" target="8373" cy:directed="1"/>
      <edge id="10853" label="Q9DCJ5 (pp) P50516" source="8349" target="8262" cy:directed="1"/>
      <edge id="10852" label="Q91YT0 (pp) Q9WUM5" source="8348" target="8245" cy:directed="1"/>
      <edge id="10851" label="Q91YT0 (pp) Q8CAQ8" source="8348" target="8522" cy:directed="1"/>
      <edge id="10850" label="Q91YT0 (pp) Q9DCJ5" source="8348" target="8349" cy:directed="1"/>
      <edge id="10849" label="Q91YT0 (pp) Q99LX0" source="8348" target="8286" cy:directed="1"/>
      <edge id="10848" label="Q91YT0 (pp) Q9CQ69" source="8348" target="8203" cy:directed="1"/>
      <edge id="10847" label="Q91YT0 (pp) O09111" source="8348" target="8180" cy:directed="1"/>
      <edge id="10846" label="Q91YT0 (pp) Q8K3J1" source="8348" target="8373" cy:directed="1"/>
      <edge id="10845" label="Q91YT0 (pp) Q91VR2" source="8348" target="8232" cy:directed="1"/>
      <edge id="10844" label="Q91YT0 (pp) Q3UIU2" source="8348" target="8257" cy:directed="1"/>
      <edge id="10843" label="Q91YT0 (pp) Q9D2G2" source="8348" target="8256" cy:directed="1"/>
      <edge id="10842" label="Q91YT0 (pp) Q9DCS9" source="8348" target="8235" cy:directed="1"/>
      <edge id="10841" label="Q91YT0 (pp) Q9D3D9" source="8348" target="8179" cy:directed="1"/>
      <edge id="10840" label="Q91YT0 (pp) Q9ERS2" source="8348" target="8308" cy:directed="1"/>
      <edge id="10839" label="Q91YT0 (pp) Q60597" source="8348" target="8480" cy:directed="1"/>
      <edge id="10838" label="Q91YT0 (pp) Q9CR68" source="8348" target="8236" cy:directed="1"/>
      <edge id="10837" label="Q91YT0 (pp) Q9CQQ7" source="8348" target="8378" cy:directed="1"/>
      <edge id="10836" label="Q91YT0 (pp) Q9DCX2" source="8348" target="8335" cy:directed="1"/>
      <edge id="10835" label="Q91YT0 (pp) Q9DC69" source="8348" target="8376" cy:directed="1"/>
      <edge id="10834" label="Q91YT0 (pp) P70404" source="8348" target="8263" cy:directed="1"/>
      <edge id="10833" label="Q91YT0 (pp) Q9D6J6" source="8348" target="8176" cy:directed="1"/>
      <edge id="10832" label="Q91YT0 (pp) Q9CQH3" source="8348" target="8209" cy:directed="1"/>
      <edge id="10831" label="Q91YT0 (pp) Q06185" source="8348" target="8240" cy:directed="1"/>
      <edge id="10830" label="Q9JM76 (pp) P59999" source="8347" target="8461" cy:directed="1"/>
      <edge id="10829" label="Q9JM76 (pp) P68510" source="8347" target="8182" cy:directed="1"/>
      <edge id="10828" label="Q9JM76 (pp) Q9D898" source="8347" target="8390" cy:directed="1"/>
      <edge id="10827" label="Q9R0Q6 (pp) Q9CPW4" source="8346" target="8483" cy:directed="1"/>
      <edge id="10826" label="Q9R0Q6 (pp) P59999" source="8346" target="8461" cy:directed="1"/>
      <edge id="10825" label="Q9R0Q6 (pp) Q9JM76" source="8346" target="8347" cy:directed="1"/>
      <edge id="10824" label="Q68FD5 (pp) P17426" source="8345" target="8260" cy:directed="1"/>
      <edge id="10823" label="Q68FD5 (pp) Q62420" source="8345" target="8440" cy:directed="1"/>
      <edge id="10822" label="Q68FD5 (pp) P62962" source="8345" target="8411" cy:directed="1"/>
      <edge id="10821" label="Q68FD5 (pp) P35438" source="8345" target="8184" cy:directed="1"/>
      <edge id="10820" label="Q68FD5 (pp) Q6IRU5" source="8345" target="8506" cy:directed="1"/>
      <edge id="10819" label="Q68FD5 (pp) P63101" source="8345" target="8448" cy:directed="1"/>
      <edge id="10818" label="Q68FD5 (pp) Q80VP1" source="8345" target="8601" cy:directed="1"/>
      <edge id="10817" label="Q68FD5 (pp) O35643" source="8345" target="8648" cy:directed="1"/>
      <edge id="10816" label="Q68FD5 (pp) Q80TZ3" source="8345" target="8694" cy:directed="1"/>
      <edge id="10815" label="Q68FD5 (pp) Q9Z0R4" source="8345" target="8570" cy:directed="1"/>
      <edge id="10814" label="Q68FD5 (pp) O70589" source="8345" target="8533" cy:directed="1"/>
      <edge id="10813" label="Q68FD5 (pp) O08585" source="8345" target="8576" cy:directed="1"/>
      <edge id="10812" label="Q68FD5 (pp) P62743" source="8345" target="8626" cy:directed="1"/>
      <edge id="10811" label="Q68FD5 (pp) Q8CHC4" source="8345" target="8608" cy:directed="1"/>
      <edge id="10810" label="Q68FD5 (pp) Q01097" source="8345" target="8173" cy:directed="1"/>
      <edge id="10809" label="Q68FD5 (pp) Q8CHU3" source="8345" target="8460" cy:directed="1"/>
      <edge id="10808" label="Q68FD5 (pp) Q61548" source="8345" target="8387" cy:directed="1"/>
      <edge id="10807" label="Q68FD5 (pp) P62259" source="8345" target="8194" cy:directed="1"/>
      <edge id="10806" label="Q60864 (pp) P63038" source="8343" target="8216" cy:directed="1"/>
      <edge id="10805" label="Q60864 (pp) P04925" source="8343" target="8354" cy:directed="1"/>
      <edge id="10804" label="Q60864 (pp) Q9CR16" source="8343" target="8704" cy:directed="1"/>
      <edge id="10803" label="Q60864 (pp) P48722" source="8343" target="8671" cy:directed="1"/>
      <edge id="10802" label="Q60864 (pp) Q61699" source="8343" target="8687" cy:directed="1"/>
      <edge id="10801" label="Q60864 (pp) P63037" source="8343" target="8248" cy:directed="1"/>
      <edge id="10800" label="Q60864 (pp) P17156" source="8343" target="8547" cy:directed="1"/>
      <edge id="10799" label="Q60864 (pp) Q9QYJ0" source="8343" target="8344" cy:directed="1"/>
      <edge id="10798" label="P19536 (pp) P00405" source="8342" target="8638" cy:directed="1"/>
      <edge id="10797" label="P19536 (pp) Q91VR2" source="8342" target="8232" cy:directed="1"/>
      <edge id="10796" label="P19536 (pp) Q9CQH3" source="8342" target="8209" cy:directed="1"/>
      <edge id="10795" label="P19536 (pp) Q9CQ69" source="8342" target="8203" cy:directed="1"/>
      <edge id="10794" label="P19536 (pp) P56391" source="8342" target="8300" cy:directed="1"/>
      <edge id="10793" label="P19536 (pp) Q9D3D9" source="8342" target="8179" cy:directed="1"/>
      <edge id="10792" label="P19536 (pp) Q9CR68" source="8342" target="8236" cy:directed="1"/>
      <edge id="10791" label="Q9JLB0 (pp) O70318" source="8340" target="8566" cy:directed="1"/>
      <edge id="10790" label="Q9JLB0 (pp) Q8R5M8" source="8340" target="8297" cy:directed="1"/>
      <edge id="10789" label="Q9JLB0 (pp) Q99N28" source="8340" target="8341" cy:directed="1"/>
      <edge id="10788" label="Q8BVE3 (pp) Q9DC69" source="8339" target="8376" cy:directed="1"/>
      <edge id="10787" label="Q8BVE3 (pp) P50516" source="8339" target="8262" cy:directed="1"/>
      <edge id="10786" label="Q8BVE3 (pp) P63082" source="8339" target="8417" cy:directed="1"/>
      <edge id="10785" label="Q8BVE3 (pp) Q9Z1G4" source="8339" target="8244" cy:directed="1"/>
      <edge id="10784" label="Q8BVE3 (pp) P45878" source="8339" target="8388" cy:directed="1"/>
      <edge id="10783" label="P50518 (pp) P50516" source="8338" target="8262" cy:directed="1"/>
      <edge id="10782" label="P50518 (pp) Q9Z1G3" source="8338" target="8193" cy:directed="1"/>
      <edge id="10781" label="P50518 (pp) Q9WTT4" source="8338" target="8458" cy:directed="1"/>
      <edge id="10780" label="P50518 (pp) P57746" source="8338" target="8261" cy:directed="1"/>
      <edge id="10779" label="P50518 (pp) P63082" source="8338" target="8417" cy:directed="1"/>
      <edge id="10778" label="P50518 (pp) Q9Z1G4" source="8338" target="8244" cy:directed="1"/>
      <edge id="10777" label="P50518 (pp) Q8BVE3" source="8338" target="8339" cy:directed="1"/>
      <edge id="10776" label="Q61735 (pp) P97797" source="8336" target="8337" cy:directed="1"/>
      <edge id="10775" label="Q9DCX2 (pp) Q99LY9" source="8335" target="8221" cy:directed="1"/>
      <edge id="10774" label="Q9DCX2 (pp) Q9D3D9" source="8335" target="8179" cy:directed="1"/>
      <edge id="10773" label="Q9DCX2 (pp) Q9CQH3" source="8335" target="8209" cy:directed="1"/>
      <edge id="10772" label="Q9DCX2 (pp) Q9D6J6" source="8335" target="8176" cy:directed="1"/>
      <edge id="10771" label="Q9DCX2 (pp) Q9CQQ7" source="8335" target="8378" cy:directed="1"/>
      <edge id="10770" label="Q9DCX2 (pp) Q91VR2" source="8335" target="8232" cy:directed="1"/>
      <edge id="10769" label="Q9DCX2 (pp) Q99LX0" source="8335" target="8286" cy:directed="1"/>
      <edge id="10768" label="Q9DCX2 (pp) Q9ERS2" source="8335" target="8308" cy:directed="1"/>
      <edge id="10767" label="Q7TMF3 (pp) Q99LC3" source="8334" target="8220" cy:directed="1"/>
      <edge id="10766" label="Q7TMF3 (pp) Q91VD9" source="8334" target="8234" cy:directed="1"/>
      <edge id="10765" label="Q7TMF3 (pp) Q91YT0" source="8334" target="8348" cy:directed="1"/>
      <edge id="10764" label="Q7TMF3 (pp) Q9CQ69" source="8334" target="8203" cy:directed="1"/>
      <edge id="10763" label="Q7TMF3 (pp) Q9D6J6" source="8334" target="8176" cy:directed="1"/>
      <edge id="10762" label="Q7TMF3 (pp) Q9D3D9" source="8334" target="8179" cy:directed="1"/>
      <edge id="10761" label="Q7TMF3 (pp) Q9CQH3" source="8334" target="8209" cy:directed="1"/>
      <edge id="10760" label="Q7TMF3 (pp) Q9CQC7" source="8334" target="8463" cy:directed="1"/>
      <edge id="10759" label="Q7TMF3 (pp) Q8K3J1" source="8334" target="8373" cy:directed="1"/>
      <edge id="10758" label="Q7TMF3 (pp) Q99LY9" source="8334" target="8221" cy:directed="1"/>
      <edge id="10757" label="Q7TMF3 (pp) Q9D6J5" source="8334" target="8456" cy:directed="1"/>
      <edge id="10756" label="Q7TMF3 (pp) Q9CQJ8" source="8334" target="8239" cy:directed="1"/>
      <edge id="10755" label="Q7TMF3 (pp) Q9ERS2" source="8334" target="8308" cy:directed="1"/>
      <edge id="10754" label="Q7TMF3 (pp) Q3UIU2" source="8334" target="8257" cy:directed="1"/>
      <edge id="10753" label="Q7TMF3 (pp) Q9CQZ6" source="8334" target="8200" cy:directed="1"/>
      <edge id="10752" label="Q7TMF3 (pp) Q9DCJ5" source="8334" target="8349" cy:directed="1"/>
      <edge id="10751" label="Q7TMF3 (pp) Q9Z1P6" source="8334" target="8268" cy:directed="1"/>
      <edge id="10750" label="Q7TMF3 (pp) Q9CQQ7" source="8334" target="8378" cy:directed="1"/>
      <edge id="10749" label="Q7TMF3 (pp) Q9CQZ5" source="8334" target="8175" cy:directed="1"/>
      <edge id="10748" label="Q7TMF3 (pp) Q9DCS9" source="8334" target="8235" cy:directed="1"/>
      <edge id="10747" label="Q7TMF3 (pp) Q9DC70" source="8334" target="8241" cy:directed="1"/>
      <edge id="10746" label="Q7TMF3 (pp) Q9D855" source="8334" target="8372" cy:directed="1"/>
      <edge id="10745" label="Q7TMF3 (pp) P52503" source="8334" target="8321" cy:directed="1"/>
      <edge id="10744" label="Q7TMF3 (pp) P97450" source="8334" target="8399" cy:directed="1"/>
      <edge id="10743" label="Q7TMF3 (pp) Q9D0M3" source="8334" target="8219" cy:directed="1"/>
      <edge id="10742" label="Q7TMF3 (pp) Q62425" source="8334" target="8514" cy:directed="1"/>
      <edge id="10741" label="Q7TMF3 (pp) Q9DC69" source="8334" target="8376" cy:directed="1"/>
      <edge id="10740" label="Q7TMF3 (pp) Q9CQ54" source="8334" target="8201" cy:directed="1"/>
      <edge id="10739" label="Q7TMF3 (pp) Q9CR68" source="8334" target="8236" cy:directed="1"/>
      <edge id="10738" label="Q7TMF3 (pp) O09111" source="8334" target="8180" cy:directed="1"/>
      <edge id="10737" label="Q7TMF3 (pp) Q9CXZ1" source="8334" target="8365" cy:directed="1"/>
      <edge id="10736" label="Q7TMF3 (pp) Q9DCX2" source="8334" target="8335" cy:directed="1"/>
      <edge id="10735" label="O35658 (pp) Q9CQQ7" source="8333" target="8378" cy:directed="1"/>
      <edge id="10734" label="O35658 (pp) P40630" source="8333" target="8563" cy:directed="1"/>
      <edge id="10733" label="Q99KR7 (pp) P56480" source="8332" target="8227" cy:directed="1"/>
      <edge id="10732" label="Q99KR7 (pp) O35658" source="8332" target="8333" cy:directed="1"/>
      <edge id="10731" label="P62874 (pp) P04925" source="8330" target="8354" cy:directed="1"/>
      <edge id="10730" label="P63213 (pp) P18872" source="8329" target="8359" cy:directed="1"/>
      <edge id="10729" label="P63213 (pp) P62874" source="8329" target="8330" cy:directed="1"/>
      <edge id="10728" label="P40142 (pp) P05063" source="8328" target="8481" cy:directed="1"/>
      <edge id="10727" label="P40142 (pp) Q9D0F9" source="8328" target="8604" cy:directed="1"/>
      <edge id="10726" label="P40142 (pp) P35486" source="8328" target="8408" cy:directed="1"/>
      <edge id="10725" label="P40142 (pp) P17182" source="8328" target="8484" cy:directed="1"/>
      <edge id="10724" label="P40142 (pp) P06151" source="8328" target="8207" cy:directed="1"/>
      <edge id="10723" label="P40142 (pp) P05064" source="8328" target="8290" cy:directed="1"/>
      <edge id="10722" label="P40142 (pp) P17751" source="8328" target="8266" cy:directed="1"/>
      <edge id="10721" label="P40142 (pp) P52480" source="8328" target="8424" cy:directed="1"/>
      <edge id="10720" label="P40142 (pp) Q60597" source="8328" target="8480" cy:directed="1"/>
      <edge id="10719" label="P40142 (pp) P16858" source="8328" target="8528" cy:directed="1"/>
      <edge id="10718" label="P40142 (pp) Q93092" source="8328" target="8423" cy:directed="1"/>
      <edge id="10717" label="P40142 (pp) P06745" source="8328" target="8433" cy:directed="1"/>
      <edge id="10716" label="P40142 (pp) Q9DCD0" source="8328" target="8191" cy:directed="1"/>
      <edge id="10715" label="P40142 (pp) P09411" source="8328" target="8267" cy:directed="1"/>
      <edge id="10714" label="Q9CQR4 (pp) Q61425" source="8327" target="8283" cy:directed="1"/>
      <edge id="10713" label="Q9CQR4 (pp) Q99LC5" source="8327" target="8284" cy:directed="1"/>
      <edge id="10712" label="Q9CQR4 (pp) Q9DCJ5" source="8327" target="8349" cy:directed="1"/>
      <edge id="10711" label="Q9CQR4 (pp) Q9CQZ5" source="8327" target="8175" cy:directed="1"/>
      <edge id="10710" label="Q9CQR4 (pp) Q9CQZ6" source="8327" target="8200" cy:directed="1"/>
      <edge id="10709" label="Q9CQR4 (pp) Q9DCD0" source="8327" target="8191" cy:directed="1"/>
      <edge id="10708" label="Q9CQR4 (pp) Q9D6J6" source="8327" target="8176" cy:directed="1"/>
      <edge id="10707" label="Q9CQR4 (pp) P97450" source="8327" target="8399" cy:directed="1"/>
      <edge id="10706" label="Q9CQR4 (pp) Q9CQH3" source="8327" target="8209" cy:directed="1"/>
      <edge id="10705" label="Q9CQV8 (pp) P10637" source="8326" target="8503" cy:directed="1"/>
      <edge id="10704" label="Q9CQV8 (pp) Q64010" source="8326" target="8398" cy:directed="1"/>
      <edge id="10703" label="Q9CQV8 (pp) P16054" source="8326" target="8412" cy:directed="1"/>
      <edge id="10702" label="Q9CQV8 (pp) P63101" source="8326" target="8448" cy:directed="1"/>
      <edge id="10701" label="Q9CQV8 (pp) P62259" source="8326" target="8194" cy:directed="1"/>
      <edge id="10700" label="P99029 (pp) Q9D6J6" source="8325" target="8176" cy:directed="1"/>
      <edge id="10699" label="P62073 (pp) Q9CQH3" source="8324" target="8209" cy:directed="1"/>
      <edge id="10698" label="P62073 (pp) Q9D6J6" source="8324" target="8176" cy:directed="1"/>
      <edge id="10697" label="P62073 (pp) P67778" source="8324" target="8230" cy:directed="1"/>
      <edge id="10696" label="P62073 (pp) Q9DCS9" source="8324" target="8235" cy:directed="1"/>
      <edge id="10695" label="P62073 (pp) Q9D3D9" source="8324" target="8179" cy:directed="1"/>
      <edge id="10694" label="P62073 (pp) Q9CR68" source="8324" target="8236" cy:directed="1"/>
      <edge id="10693" label="P62073 (pp) O35658" source="8324" target="8333" cy:directed="1"/>
      <edge id="10692" label="P62073 (pp) P56391" source="8324" target="8300" cy:directed="1"/>
      <edge id="10691" label="P62073 (pp) Q9DCJ5" source="8324" target="8349" cy:directed="1"/>
      <edge id="10690" label="P62073 (pp) Q925I1" source="8324" target="8558" cy:directed="1"/>
      <edge id="10689" label="P62073 (pp) Q9ERS2" source="8324" target="8308" cy:directed="1"/>
      <edge id="10688" label="P62073 (pp) O08756" source="8324" target="8352" cy:directed="1"/>
      <edge id="10687" label="P62073 (pp) P99029" source="8324" target="8325" cy:directed="1"/>
      <edge id="10686" label="Q62277 (pp) P43006" source="8323" target="8742" cy:directed="1"/>
      <edge id="10685" label="Q62277 (pp) P01831" source="8323" target="8588" cy:directed="1"/>
      <edge id="10684" label="Q62277 (pp) P63044" source="8323" target="8369" cy:directed="1"/>
      <edge id="10683" label="Q62277 (pp) P46096" source="8323" target="8659" cy:directed="1"/>
      <edge id="10682" label="Q62277 (pp) P62204" source="8323" target="8548" cy:directed="1"/>
      <edge id="10681" label="Q62277 (pp) P60879" source="8323" target="8350" cy:directed="1"/>
      <edge id="10680" label="Q60631 (pp) Q68FD5" source="8322" target="8345" cy:directed="1"/>
      <edge id="10679" label="Q60631 (pp) P39053" source="8322" target="8466" cy:directed="1"/>
      <edge id="10678" label="Q60631 (pp) Q8CHC4" source="8322" target="8608" cy:directed="1"/>
      <edge id="10677" label="Q60631 (pp) P05480" source="8322" target="8313" cy:directed="1"/>
      <edge id="10676" label="Q60631 (pp) O08585" source="8322" target="8576" cy:directed="1"/>
      <edge id="10675" label="Q60631 (pp) P12023" source="8322" target="8294" cy:directed="1"/>
      <edge id="10674" label="Q60631 (pp) P20444" source="8322" target="8645" cy:directed="1"/>
      <edge id="10673" label="Q60631 (pp) P04925" source="8322" target="8354" cy:directed="1"/>
      <edge id="10672" label="Q60631 (pp) P18052" source="8322" target="8383" cy:directed="1"/>
      <edge id="10671" label="Q60631 (pp) Q62420" source="8322" target="8440" cy:directed="1"/>
      <edge id="10670" label="Q60631 (pp) Q62277" source="8322" target="8323" cy:directed="1"/>
      <edge id="10669" label="P52503 (pp) Q9Z1P6" source="8321" target="8268" cy:directed="1"/>
      <edge id="10668" label="P52503 (pp) Q9CQ69" source="8321" target="8203" cy:directed="1"/>
      <edge id="10667" label="P52503 (pp) O09111" source="8321" target="8180" cy:directed="1"/>
      <edge id="10666" label="P52503 (pp) O08756" source="8321" target="8352" cy:directed="1"/>
      <edge id="10665" label="P52503 (pp) Q9D3D9" source="8321" target="8179" cy:directed="1"/>
      <edge id="10664" label="P52503 (pp) Q9DCS9" source="8321" target="8235" cy:directed="1"/>
      <edge id="10663" label="P52503 (pp) Q99LY9" source="8321" target="8221" cy:directed="1"/>
      <edge id="10662" label="P52503 (pp) Q9CPP6" source="8321" target="8250" cy:directed="1"/>
      <edge id="10661" label="P52503 (pp) P17665" source="8321" target="8524" cy:directed="1"/>
      <edge id="10660" label="P52503 (pp) Q9CQ54" source="8321" target="8201" cy:directed="1"/>
      <edge id="10659" label="P52503 (pp) Q06185" source="8321" target="8240" cy:directed="1"/>
      <edge id="10658" label="P52503 (pp) Q9ERS2" source="8321" target="8308" cy:directed="1"/>
      <edge id="10657" label="P52503 (pp) P99029" source="8321" target="8325" cy:directed="1"/>
      <edge id="10656" label="P52503 (pp) Q9D6J5" source="8321" target="8456" cy:directed="1"/>
      <edge id="10655" label="P52503 (pp) Q9CQC7" source="8321" target="8463" cy:directed="1"/>
      <edge id="10654" label="P52503 (pp) Q9D0M3" source="8321" target="8219" cy:directed="1"/>
      <edge id="10653" label="P52503 (pp) Q9CXZ1" source="8321" target="8365" cy:directed="1"/>
      <edge id="10652" label="P52503 (pp) Q9DCJ5" source="8321" target="8349" cy:directed="1"/>
      <edge id="10651" label="P52503 (pp) Q99LX0" source="8321" target="8286" cy:directed="1"/>
      <edge id="10650" label="P52503 (pp) P97450" source="8321" target="8399" cy:directed="1"/>
      <edge id="10649" label="P52503 (pp) Q99LC3" source="8321" target="8220" cy:directed="1"/>
      <edge id="10648" label="P52503 (pp) Q9DB20" source="8321" target="8208" cy:directed="1"/>
      <edge id="10647" label="P52503 (pp) P56391" source="8321" target="8300" cy:directed="1"/>
      <edge id="10646" label="P52503 (pp) Q9CR68" source="8321" target="8236" cy:directed="1"/>
      <edge id="10645" label="P52503 (pp) Q9CQH3" source="8321" target="8209" cy:directed="1"/>
      <edge id="10644" label="P52503 (pp) Q9CQJ8" source="8321" target="8239" cy:directed="1"/>
      <edge id="10643" label="P52503 (pp) Q9CQQ7" source="8321" target="8378" cy:directed="1"/>
      <edge id="10642" label="P52503 (pp) Q8K3J1" source="8321" target="8373" cy:directed="1"/>
      <edge id="10641" label="P52503 (pp) Q9DC69" source="8321" target="8376" cy:directed="1"/>
      <edge id="10640" label="P52503 (pp) P62073" source="8321" target="8324" cy:directed="1"/>
      <edge id="10639" label="P52503 (pp) P43024" source="8321" target="8441" cy:directed="1"/>
      <edge id="10638" label="P52503 (pp) P42125" source="8321" target="8488" cy:directed="1"/>
      <edge id="10637" label="P52503 (pp) Q9CQZ5" source="8321" target="8175" cy:directed="1"/>
      <edge id="10636" label="P52503 (pp) Q91VD9" source="8321" target="8234" cy:directed="1"/>
      <edge id="10635" label="P52503 (pp) Q9CZ13" source="8321" target="8218" cy:directed="1"/>
      <edge id="10634" label="P52503 (pp) Q91YT0" source="8321" target="8348" cy:directed="1"/>
      <edge id="10633" label="P52503 (pp) Q9CQZ6" source="8321" target="8200" cy:directed="1"/>
      <edge id="10632" label="P52503 (pp) P48771" source="8321" target="8272" cy:directed="1"/>
      <edge id="10631" label="P52503 (pp) Q9D6J6" source="8321" target="8176" cy:directed="1"/>
      <edge id="10630" label="Q8R4N0 (pp) Q99LC5" source="8320" target="8284" cy:directed="1"/>
      <edge id="10629" label="Q8R4N0 (pp) Q9WUM5" source="8320" target="8245" cy:directed="1"/>
      <edge id="10628" label="Q8R4N0 (pp) P05480" source="8320" target="8313" cy:directed="1"/>
      <edge id="10627" label="Q8R4N0 (pp) Q99MR8" source="8320" target="8594" cy:directed="1"/>
      <edge id="10626" label="Q8R4N0 (pp) Q91ZA3" source="8320" target="8446" cy:directed="1"/>
      <edge id="10625" label="Q3ULD5 (pp) Q05920" source="8319" target="8223" cy:directed="1"/>
      <edge id="10624" label="Q3ULD5 (pp) Q9D0K2" source="8319" target="8246" cy:directed="1"/>
      <edge id="10623" label="Q3ULD5 (pp) Q99MR8" source="8319" target="8594" cy:directed="1"/>
      <edge id="10622" label="Q3ULD5 (pp) Q91ZA3" source="8319" target="8446" cy:directed="1"/>
      <edge id="10621" label="Q3ULD5 (pp) Q8BH95" source="8319" target="8217" cy:directed="1"/>
      <edge id="10620" label="Q3ULD5 (pp) Q8BMS1" source="8319" target="8485" cy:directed="1"/>
      <edge id="10619" label="Q3ULD5 (pp) Q921G7" source="8319" target="8279" cy:directed="1"/>
      <edge id="10618" label="Q3ULD5 (pp) Q9JHI5" source="8319" target="8422" cy:directed="1"/>
      <edge id="10617" label="Q3ULD5 (pp) Q99MN9" source="8319" target="8403" cy:directed="1"/>
      <edge id="10616" label="Q3ULD5 (pp) Q8R4N0" source="8319" target="8320" cy:directed="1"/>
      <edge id="10615" label="Q8VEM8 (pp) Q9D3D9" source="8318" target="8179" cy:directed="1"/>
      <edge id="10614" label="Q8VEM8 (pp) Q9CQQ7" source="8318" target="8378" cy:directed="1"/>
      <edge id="10613" label="Q8VEM8 (pp) Q9CQH3" source="8318" target="8209" cy:directed="1"/>
      <edge id="10612" label="Q8VEM8 (pp) Q9D6J6" source="8318" target="8176" cy:directed="1"/>
      <edge id="10611" label="P68369 (pp) P60879" source="8317" target="8350" cy:directed="1"/>
      <edge id="10610" label="P68369 (pp) P35438" source="8317" target="8184" cy:directed="1"/>
      <edge id="10609" label="P68369 (pp) P63101" source="8317" target="8448" cy:directed="1"/>
      <edge id="10608" label="P68369 (pp) P27546" source="8317" target="8634" cy:directed="1"/>
      <edge id="10607" label="P68369 (pp) P39053" source="8317" target="8466" cy:directed="1"/>
      <edge id="10606" label="Q8K2B3 (pp) Q99JY0" source="8316" target="8353" cy:directed="1"/>
      <edge id="10605" label="Q8K2B3 (pp) P58281" source="8316" target="8633" cy:directed="1"/>
      <edge id="10604" label="Q8K2B3 (pp) P17751" source="8316" target="8266" cy:directed="1"/>
      <edge id="10603" label="Q8K2B3 (pp) Q91VD9" source="8316" target="8234" cy:directed="1"/>
      <edge id="10602" label="Q8K2B3 (pp) Q9D6R2" source="8316" target="8205" cy:directed="1"/>
      <edge id="10601" label="Q8K2B3 (pp) P63038" source="8316" target="8216" cy:directed="1"/>
      <edge id="10600" label="Q8K2B3 (pp) Q8K3J1" source="8316" target="8373" cy:directed="1"/>
      <edge id="10599" label="Q8K2B3 (pp) P35486" source="8316" target="8408" cy:directed="1"/>
      <edge id="10598" label="Q8K2B3 (pp) Q9DB77" source="8316" target="8374" cy:directed="1"/>
      <edge id="10597" label="Q8K2B3 (pp) Q9D6J6" source="8316" target="8176" cy:directed="1"/>
      <edge id="10596" label="Q8K2B3 (pp) Q9DC69" source="8316" target="8376" cy:directed="1"/>
      <edge id="10595" label="Q8K2B3 (pp) Q9CZ13" source="8316" target="8218" cy:directed="1"/>
      <edge id="10594" label="Q8K2B3 (pp) Q9CR68" source="8316" target="8236" cy:directed="1"/>
      <edge id="10593" label="Q8K2B3 (pp) Q99LC5" source="8316" target="8284" cy:directed="1"/>
      <edge id="10592" label="Q8K2B3 (pp) Q9WUM5" source="8316" target="8245" cy:directed="1"/>
      <edge id="10591" label="Q8K2B3 (pp) P56480" source="8316" target="8227" cy:directed="1"/>
      <edge id="10590" label="Q8K2B3 (pp) Q60597" source="8316" target="8480" cy:directed="1"/>
      <edge id="10589" label="Q8K2B3 (pp) P00493" source="8316" target="8569" cy:directed="1"/>
      <edge id="10588" label="Q8K2B3 (pp) Q9Z2I9" source="8316" target="8427" cy:directed="1"/>
      <edge id="10587" label="Q8K2B3 (pp) Q91YT0" source="8316" target="8348" cy:directed="1"/>
      <edge id="10586" label="Q8K2B3 (pp) P09411" source="8316" target="8267" cy:directed="1"/>
      <edge id="10585" label="Q8K2B3 (pp) Q99KI0" source="8316" target="8307" cy:directed="1"/>
      <edge id="10584" label="Q8K2B3 (pp) Q9CQQ7" source="8316" target="8378" cy:directed="1"/>
      <edge id="10583" label="Q8K2B3 (pp) Q9CPP6" source="8316" target="8250" cy:directed="1"/>
      <edge id="10582" label="Q8K2B3 (pp) P52196" source="8316" target="8237" cy:directed="1"/>
      <edge id="10581" label="Q8K2B3 (pp) Q03265" source="8316" target="8181" cy:directed="1"/>
      <edge id="10580" label="Q8K2B3 (pp) Q9D051" source="8316" target="8178" cy:directed="1"/>
      <edge id="10579" label="Q8K2B3 (pp) Q9Z0X1" source="8316" target="8519" cy:directed="1"/>
      <edge id="10578" label="Q8K2B3 (pp) Q9D2G2" source="8316" target="8256" cy:directed="1"/>
      <edge id="10577" label="Q8K2B3 (pp) Q91VR2" source="8316" target="8232" cy:directed="1"/>
      <edge id="10576" label="Q8K2B3 (pp) Q9D0M3" source="8316" target="8219" cy:directed="1"/>
      <edge id="10575" label="Q8K2B3 (pp) Q8VEM8" source="8316" target="8318" cy:directed="1"/>
      <edge id="10574" label="Q8K2B3 (pp) Q8JZQ2" source="8316" target="8362" cy:directed="1"/>
      <edge id="10573" label="Q8K2B3 (pp) P97807" source="8316" target="8309" cy:directed="1"/>
      <edge id="10572" label="Q91WD5 (pp) Q9CPP6" source="8315" target="8250" cy:directed="1"/>
      <edge id="10571" label="Q91WD5 (pp) Q99LY9" source="8315" target="8221" cy:directed="1"/>
      <edge id="10570" label="Q91WD5 (pp) Q91YT0" source="8315" target="8348" cy:directed="1"/>
      <edge id="10569" label="Q91WD5 (pp) Q9DC69" source="8315" target="8376" cy:directed="1"/>
      <edge id="10568" label="Q91WD5 (pp) Q9WUM5" source="8315" target="8245" cy:directed="1"/>
      <edge id="10567" label="Q91WD5 (pp) P35486" source="8315" target="8408" cy:directed="1"/>
      <edge id="10566" label="Q91WD5 (pp) Q91VD9" source="8315" target="8234" cy:directed="1"/>
      <edge id="10565" label="Q91WD5 (pp) P09411" source="8315" target="8267" cy:directed="1"/>
      <edge id="10564" label="Q91WD5 (pp) Q9DB20" source="8315" target="8208" cy:directed="1"/>
      <edge id="10563" label="Q91WD5 (pp) Q9CZ13" source="8315" target="8218" cy:directed="1"/>
      <edge id="10562" label="Q91WD5 (pp) Q99LC5" source="8315" target="8284" cy:directed="1"/>
      <edge id="10561" label="Q91WD5 (pp) Q8BH95" source="8315" target="8217" cy:directed="1"/>
      <edge id="10560" label="Q91WD5 (pp) P17751" source="8315" target="8266" cy:directed="1"/>
      <edge id="10559" label="Q91WD5 (pp) P52503" source="8315" target="8321" cy:directed="1"/>
      <edge id="10558" label="Q91WD5 (pp) Q8K1Z0" source="8315" target="8288" cy:directed="1"/>
      <edge id="10557" label="Q91WD5 (pp) Q9ERS2" source="8315" target="8308" cy:directed="1"/>
      <edge id="10556" label="Q91WD5 (pp) Q9CQ75" source="8315" target="8358" cy:directed="1"/>
      <edge id="10555" label="Q91WD5 (pp) Q9D6J5" source="8315" target="8456" cy:directed="1"/>
      <edge id="10554" label="Q91WD5 (pp) Q8K3J1" source="8315" target="8373" cy:directed="1"/>
      <edge id="10553" label="Q91WD5 (pp) P56480" source="8315" target="8227" cy:directed="1"/>
      <edge id="10552" label="Q91WD5 (pp) Q6PB66" source="8315" target="8467" cy:directed="1"/>
      <edge id="10551" label="Q91WD5 (pp) Q8CAQ8" source="8315" target="8522" cy:directed="1"/>
      <edge id="10550" label="Q91WD5 (pp) Q7TMF3" source="8315" target="8334" cy:directed="1"/>
      <edge id="10549" label="Q91WD5 (pp) Q03265" source="8315" target="8181" cy:directed="1"/>
      <edge id="10548" label="Q91WD5 (pp) Q8BGH2" source="8315" target="8285" cy:directed="1"/>
      <edge id="10547" label="Q91WD5 (pp) P20108" source="8315" target="8396" cy:directed="1"/>
      <edge id="10546" label="Q91WD5 (pp) Q3ULD5" source="8315" target="8319" cy:directed="1"/>
      <edge id="10545" label="Q91WD5 (pp) Q9CR68" source="8315" target="8236" cy:directed="1"/>
      <edge id="10544" label="Q91WD5 (pp) Q9DCS9" source="8315" target="8235" cy:directed="1"/>
      <edge id="10543" label="Q91WD5 (pp) Q9D6J6" source="8315" target="8176" cy:directed="1"/>
      <edge id="10542" label="Q91WD5 (pp) Q9CXZ1" source="8315" target="8365" cy:directed="1"/>
      <edge id="10541" label="Q91WD5 (pp) Q9DB77" source="8315" target="8374" cy:directed="1"/>
      <edge id="10540" label="Q91WD5 (pp) Q9CQJ8" source="8315" target="8239" cy:directed="1"/>
      <edge id="10539" label="Q91WD5 (pp) Q9CQC7" source="8315" target="8463" cy:directed="1"/>
      <edge id="10538" label="Q91WD5 (pp) P97450" source="8315" target="8399" cy:directed="1"/>
      <edge id="10537" label="Q91WD5 (pp) Q9CQZ5" source="8315" target="8175" cy:directed="1"/>
      <edge id="10536" label="Q91WD5 (pp) Q99LC3" source="8315" target="8220" cy:directed="1"/>
      <edge id="10535" label="Q91WD5 (pp) Q99LX0" source="8315" target="8286" cy:directed="1"/>
      <edge id="10534" label="Q91WD5 (pp) Q9CQQ7" source="8315" target="8378" cy:directed="1"/>
      <edge id="10533" label="Q91WD5 (pp) P97807" source="8315" target="8309" cy:directed="1"/>
      <edge id="10532" label="Q91WD5 (pp) Q9DC70" source="8315" target="8241" cy:directed="1"/>
      <edge id="10531" label="Q91WD5 (pp) Q9CQH3" source="8315" target="8209" cy:directed="1"/>
      <edge id="10530" label="Q91WD5 (pp) Q9D855" source="8315" target="8372" cy:directed="1"/>
      <edge id="10529" label="Q91WD5 (pp) Q9CQ69" source="8315" target="8203" cy:directed="1"/>
      <edge id="10528" label="Q91WD5 (pp) Q91VR2" source="8315" target="8232" cy:directed="1"/>
      <edge id="10527" label="Q91WD5 (pp) Q99JY0" source="8315" target="8353" cy:directed="1"/>
      <edge id="10526" label="Q91WD5 (pp) Q99KI0" source="8315" target="8307" cy:directed="1"/>
      <edge id="10525" label="Q91WD5 (pp) Q9D0M3" source="8315" target="8219" cy:directed="1"/>
      <edge id="10524" label="Q91WD5 (pp) Q8VEM8" source="8315" target="8318" cy:directed="1"/>
      <edge id="10523" label="Q91WD5 (pp) P70404" source="8315" target="8263" cy:directed="1"/>
      <edge id="10522" label="Q91WD5 (pp) P08249" source="8315" target="8204" cy:directed="1"/>
      <edge id="10521" label="Q91WD5 (pp) Q9DCJ5" source="8315" target="8349" cy:directed="1"/>
      <edge id="10520" label="Q91WD5 (pp) Q99MN9" source="8315" target="8403" cy:directed="1"/>
      <edge id="10519" label="Q91WD5 (pp) Q9CQZ6" source="8315" target="8200" cy:directed="1"/>
      <edge id="10518" label="Q91WD5 (pp) Q8K2B3" source="8315" target="8316" cy:directed="1"/>
      <edge id="10517" label="P51881 (pp) P16054" source="8314" target="8412" cy:directed="1"/>
      <edge id="10516" label="P51881 (pp) P62259" source="8314" target="8194" cy:directed="1"/>
      <edge id="10515" label="P05480 (pp) P23242" source="8313" target="8701" cy:directed="1"/>
      <edge id="10514" label="P05480 (pp) P30999" source="8313" target="8553" cy:directed="1"/>
      <edge id="10513" label="P05480 (pp) P39053" source="8313" target="8466" cy:directed="1"/>
      <edge id="10512" label="P05480 (pp) P35438" source="8313" target="8184" cy:directed="1"/>
      <edge id="10511" label="P05480 (pp) P35436" source="8313" target="8189" cy:directed="1"/>
      <edge id="10510" label="Q02248 (pp) P63001" source="8312" target="8367" cy:directed="1"/>
      <edge id="10509" label="Q02248 (pp) Q01097" source="8312" target="8173" cy:directed="1"/>
      <edge id="10508" label="Q02248 (pp) O88712" source="8312" target="8510" cy:directed="1"/>
      <edge id="10507" label="Q02248 (pp) Q68FH0" source="8312" target="8717" cy:directed="1"/>
      <edge id="10506" label="Q02248 (pp) P68510" source="8312" target="8182" cy:directed="1"/>
      <edge id="10505" label="Q02248 (pp) P39688" source="8312" target="8355" cy:directed="1"/>
      <edge id="10504" label="Q02248 (pp) P35438" source="8312" target="8184" cy:directed="1"/>
      <edge id="10503" label="Q02248 (pp) Q61301" source="8312" target="8426" cy:directed="1"/>
      <edge id="10502" label="Q02248 (pp) P05480" source="8312" target="8313" cy:directed="1"/>
      <edge id="10501" label="P60710 (pp) O70589" source="8311" target="8533" cy:directed="1"/>
      <edge id="10500" label="P60710 (pp) Q9JM76" source="8311" target="8347" cy:directed="1"/>
      <edge id="10499" label="P60710 (pp) Q9CPW4" source="8311" target="8483" cy:directed="1"/>
      <edge id="10498" label="P60710 (pp) P16054" source="8311" target="8412" cy:directed="1"/>
      <edge id="10497" label="P60710 (pp) P35438" source="8311" target="8184" cy:directed="1"/>
      <edge id="10496" label="P60710 (pp) Q9D898" source="8311" target="8390" cy:directed="1"/>
      <edge id="10495" label="P60710 (pp) P59999" source="8311" target="8461" cy:directed="1"/>
      <edge id="10494" label="P60710 (pp) Q9R0Q6" source="8311" target="8346" cy:directed="1"/>
      <edge id="10493" label="Q6PHZ2 (pp) P68369" source="8310" target="8317" cy:directed="1"/>
      <edge id="10492" label="Q6PHZ2 (pp) P63101" source="8310" target="8448" cy:directed="1"/>
      <edge id="10491" label="Q6PHZ2 (pp) P35436" source="8310" target="8189" cy:directed="1"/>
      <edge id="10490" label="Q6PHZ2 (pp) P99024" source="8310" target="8536" cy:directed="1"/>
      <edge id="10489" label="Q6PHZ2 (pp) P60710" source="8310" target="8311" cy:directed="1"/>
      <edge id="10488" label="P97807 (pp) P05202" source="8309" target="8185" cy:directed="1"/>
      <edge id="10487" label="P97807 (pp) Q60931" source="8309" target="8525" cy:directed="1"/>
      <edge id="10486" label="P97807 (pp) Q9CQH3" source="8309" target="8209" cy:directed="1"/>
      <edge id="10485" label="P97807 (pp) Q921G7" source="8309" target="8279" cy:directed="1"/>
      <edge id="10484" label="P97807 (pp) Q9CR68" source="8309" target="8236" cy:directed="1"/>
      <edge id="10483" label="P97807 (pp) Q61425" source="8309" target="8283" cy:directed="1"/>
      <edge id="10482" label="P97807 (pp) Q8BMF4" source="8309" target="8222" cy:directed="1"/>
      <edge id="10481" label="P97807 (pp) P06745" source="8309" target="8433" cy:directed="1"/>
      <edge id="10480" label="P97807 (pp) Q9D6J6" source="8309" target="8176" cy:directed="1"/>
      <edge id="10479" label="P97807 (pp) Q9WUM5" source="8309" target="8245" cy:directed="1"/>
      <edge id="10478" label="P97807 (pp) P06151" source="8309" target="8207" cy:directed="1"/>
      <edge id="10477" label="P97807 (pp) Q8K3J1" source="8309" target="8373" cy:directed="1"/>
      <edge id="10476" label="P97807 (pp) Q91YT0" source="8309" target="8348" cy:directed="1"/>
      <edge id="10475" label="P97807 (pp) Q91VR2" source="8309" target="8232" cy:directed="1"/>
      <edge id="10474" label="P97807 (pp) Q05920" source="8309" target="8223" cy:directed="1"/>
      <edge id="10473" label="P97807 (pp) Q60597" source="8309" target="8480" cy:directed="1"/>
      <edge id="10472" label="P97807 (pp) Q9DC69" source="8309" target="8376" cy:directed="1"/>
      <edge id="10471" label="P97807 (pp) Q99LC5" source="8309" target="8284" cy:directed="1"/>
      <edge id="10470" label="P97807 (pp) Q9DCS9" source="8309" target="8235" cy:directed="1"/>
      <edge id="10469" label="P97807 (pp) Q9DCJ5" source="8309" target="8349" cy:directed="1"/>
      <edge id="10468" label="P97807 (pp) Q9DCD0" source="8309" target="8191" cy:directed="1"/>
      <edge id="10467" label="P97807 (pp) O08756" source="8309" target="8352" cy:directed="1"/>
      <edge id="10466" label="P97807 (pp) P48771" source="8309" target="8272" cy:directed="1"/>
      <edge id="10465" label="P97807 (pp) Q9CQQ7" source="8309" target="8378" cy:directed="1"/>
      <edge id="10464" label="P97807 (pp) Q9D6R2" source="8309" target="8205" cy:directed="1"/>
      <edge id="10463" label="P97807 (pp) Q9D2G2" source="8309" target="8256" cy:directed="1"/>
      <edge id="10462" label="P97807 (pp) Q99LX0" source="8309" target="8286" cy:directed="1"/>
      <edge id="10461" label="P97807 (pp) P54071" source="8309" target="8206" cy:directed="1"/>
      <edge id="10460" label="P97807 (pp) Q06185" source="8309" target="8240" cy:directed="1"/>
      <edge id="10459" label="Q9ERS2 (pp) Q9CQH3" source="8308" target="8209" cy:directed="1"/>
      <edge id="10458" label="Q9ERS2 (pp) Q9D6J6" source="8308" target="8176" cy:directed="1"/>
      <edge id="10457" label="Q9ERS2 (pp) O09111" source="8308" target="8180" cy:directed="1"/>
      <edge id="10456" label="Q9ERS2 (pp) Q91VR2" source="8308" target="8232" cy:directed="1"/>
      <edge id="10455" label="Q9ERS2 (pp) P50516" source="8308" target="8262" cy:directed="1"/>
      <edge id="10454" label="Q99KI0 (pp) Q9D6J6" source="8307" target="8176" cy:directed="1"/>
      <edge id="10453" label="Q99KI0 (pp) P05064" source="8307" target="8290" cy:directed="1"/>
      <edge id="10452" label="Q99KI0 (pp) P56480" source="8307" target="8227" cy:directed="1"/>
      <edge id="10451" label="Q99KI0 (pp) P97807" source="8307" target="8309" cy:directed="1"/>
      <edge id="10450" label="Q99KI0 (pp) Q01097" source="8307" target="8173" cy:directed="1"/>
      <edge id="10449" label="Q99KI0 (pp) Q03265" source="8307" target="8181" cy:directed="1"/>
      <edge id="10448" label="Q99KI0 (pp) Q9Z1J3" source="8307" target="8512" cy:directed="1"/>
      <edge id="10447" label="Q99KI0 (pp) P35486" source="8307" target="8408" cy:directed="1"/>
      <edge id="10446" label="Q99KI0 (pp) Q99LX0" source="8307" target="8286" cy:directed="1"/>
      <edge id="10445" label="Q99KI0 (pp) Q60597" source="8307" target="8480" cy:directed="1"/>
      <edge id="10444" label="Q99KI0 (pp) Q9WUM5" source="8307" target="8245" cy:directed="1"/>
      <edge id="10443" label="Q99KI0 (pp) P68510" source="8307" target="8182" cy:directed="1"/>
      <edge id="10442" label="Q99KI0 (pp) Q8K1M6" source="8307" target="8419" cy:directed="1"/>
      <edge id="10441" label="Q99KI0 (pp) Q9CPP6" source="8307" target="8250" cy:directed="1"/>
      <edge id="10440" label="Q99KI0 (pp) Q9D0M3" source="8307" target="8219" cy:directed="1"/>
      <edge id="10439" label="Q99KI0 (pp) Q9DCJ5" source="8307" target="8349" cy:directed="1"/>
      <edge id="10438" label="Q99KI0 (pp) Q9DB20" source="8307" target="8208" cy:directed="1"/>
      <edge id="10437" label="Q99KI0 (pp) P06745" source="8307" target="8433" cy:directed="1"/>
      <edge id="10436" label="Q99KI0 (pp) Q9CR68" source="8307" target="8236" cy:directed="1"/>
      <edge id="10435" label="Q99KI0 (pp) Q91YT0" source="8307" target="8348" cy:directed="1"/>
      <edge id="10434" label="Q99KI0 (pp) Q9ERS2" source="8307" target="8308" cy:directed="1"/>
      <edge id="10433" label="Q99KI0 (pp) Q9D6R2" source="8307" target="8205" cy:directed="1"/>
      <edge id="10432" label="Q99KI0 (pp) O09111" source="8307" target="8180" cy:directed="1"/>
      <edge id="10431" label="Q99KI0 (pp) P70404" source="8307" target="8263" cy:directed="1"/>
      <edge id="10430" label="Q99KI0 (pp) Q9D3D9" source="8307" target="8179" cy:directed="1"/>
      <edge id="10429" label="Q99KI0 (pp) Q05920" source="8307" target="8223" cy:directed="1"/>
      <edge id="10428" label="Q99KI0 (pp) P52480" source="8307" target="8424" cy:directed="1"/>
      <edge id="10427" label="Q99KI0 (pp) P47857" source="8307" target="8500" cy:directed="1"/>
      <edge id="10426" label="Q99KI0 (pp) P54071" source="8307" target="8206" cy:directed="1"/>
      <edge id="10425" label="Q99KI0 (pp) P63038" source="8307" target="8216" cy:directed="1"/>
      <edge id="10424" label="Q99KI0 (pp) Q9CZ13" source="8307" target="8218" cy:directed="1"/>
      <edge id="10423" label="Q99KI0 (pp) Q9DB77" source="8307" target="8374" cy:directed="1"/>
      <edge id="10422" label="Q99KI0 (pp) Q9DC69" source="8307" target="8376" cy:directed="1"/>
      <edge id="10421" label="Q99KI0 (pp) P17751" source="8307" target="8266" cy:directed="1"/>
      <edge id="10420" label="Q99KI0 (pp) Q9CQH3" source="8307" target="8209" cy:directed="1"/>
      <edge id="10419" label="Q99KI0 (pp) Q91VR2" source="8307" target="8232" cy:directed="1"/>
      <edge id="10418" label="Q99KI0 (pp) Q62351" source="8307" target="8368" cy:directed="1"/>
      <edge id="10417" label="Q99KI0 (pp) Q9D2G2" source="8307" target="8256" cy:directed="1"/>
      <edge id="10416" label="O08788 (pp) O35465" source="8306" target="8415" cy:directed="1"/>
      <edge id="10415" label="Q99KJ8 (pp) P28667" source="8305" target="8586" cy:directed="1"/>
      <edge id="10414" label="Q99KJ8 (pp) O08788" source="8305" target="8306" cy:directed="1"/>
      <edge id="10413" label="Q91Z53 (pp) P45376" source="8304" target="8580" cy:directed="1"/>
      <edge id="10412" label="P26443 (pp) Q9DCD0" source="8303" target="8191" cy:directed="1"/>
      <edge id="10411" label="P26443 (pp) P54071" source="8303" target="8206" cy:directed="1"/>
      <edge id="10410" label="P26443 (pp) P48320" source="8303" target="8292" cy:directed="1"/>
      <edge id="10409" label="P26443 (pp) Q99KI0" source="8303" target="8307" cy:directed="1"/>
      <edge id="10408" label="P26443 (pp) P63038" source="8303" target="8216" cy:directed="1"/>
      <edge id="10407" label="P26443 (pp) P56480" source="8303" target="8227" cy:directed="1"/>
      <edge id="10406" label="P26443 (pp) P70404" source="8303" target="8263" cy:directed="1"/>
      <edge id="10405" label="P26443 (pp) Q60597" source="8303" target="8480" cy:directed="1"/>
      <edge id="10404" label="P26443 (pp) P17751" source="8303" target="8266" cy:directed="1"/>
      <edge id="10403" label="P26443 (pp) P61922" source="8303" target="8293" cy:directed="1"/>
      <edge id="10402" label="P26443 (pp) Q05920" source="8303" target="8223" cy:directed="1"/>
      <edge id="10401" label="P26443 (pp) P05063" source="8303" target="8481" cy:directed="1"/>
      <edge id="10400" label="P26443 (pp) P29758" source="8303" target="8472" cy:directed="1"/>
      <edge id="10399" label="P26443 (pp) Q8CHT0" source="8303" target="8471" cy:directed="1"/>
      <edge id="10398" label="P26443 (pp) Q8BH04" source="8303" target="8593" cy:directed="1"/>
      <edge id="10397" label="P26443 (pp) Q9D6R2" source="8303" target="8205" cy:directed="1"/>
      <edge id="10396" label="P26443 (pp) P15105" source="8303" target="8251" cy:directed="1"/>
      <edge id="10395" label="P26443 (pp) P05202" source="8303" target="8185" cy:directed="1"/>
      <edge id="10394" label="P26443 (pp) P97807" source="8303" target="8309" cy:directed="1"/>
      <edge id="10393" label="P26443 (pp) Q61425" source="8303" target="8283" cy:directed="1"/>
      <edge id="10392" label="P26443 (pp) Q91Z53" source="8303" target="8304" cy:directed="1"/>
      <edge id="10391" label="Q62442 (pp) P61264" source="8302" target="8436" cy:directed="1"/>
      <edge id="10390" label="Q9D172 (pp) Q9DC70" source="8301" target="8241" cy:directed="1"/>
      <edge id="10389" label="Q9D172 (pp) P42125" source="8301" target="8488" cy:directed="1"/>
      <edge id="10388" label="Q9D172 (pp) Q9DCJ5" source="8301" target="8349" cy:directed="1"/>
      <edge id="10387" label="Q9D172 (pp) Q8BH95" source="8301" target="8217" cy:directed="1"/>
      <edge id="10386" label="Q9D172 (pp) Q91WD5" source="8301" target="8315" cy:directed="1"/>
      <edge id="10385" label="Q9D172 (pp) Q9CZ13" source="8301" target="8218" cy:directed="1"/>
      <edge id="10384" label="Q9D172 (pp) Q9DCT2" source="8301" target="8202" cy:directed="1"/>
      <edge id="10383" label="Q9D172 (pp) Q9CQZ5" source="8301" target="8175" cy:directed="1"/>
      <edge id="10382" label="Q9D172 (pp) Q91YT0" source="8301" target="8348" cy:directed="1"/>
      <edge id="10381" label="Q9D172 (pp) P97807" source="8301" target="8309" cy:directed="1"/>
      <edge id="10380" label="Q9D172 (pp) Q9CQH3" source="8301" target="8209" cy:directed="1"/>
      <edge id="10379" label="P56391 (pp) Q9DCX2" source="8300" target="8335" cy:directed="1"/>
      <edge id="10378" label="P56391 (pp) P17665" source="8300" target="8524" cy:directed="1"/>
      <edge id="10377" label="P56391 (pp) P00405" source="8300" target="8638" cy:directed="1"/>
      <edge id="10376" label="P56391 (pp) Q9ERS2" source="8300" target="8308" cy:directed="1"/>
      <edge id="10375" label="P56391 (pp) Q9D3D9" source="8300" target="8179" cy:directed="1"/>
      <edge id="10374" label="P56391 (pp) O09111" source="8300" target="8180" cy:directed="1"/>
      <edge id="10373" label="Q9WV18 (pp) Q80T41" source="8299" target="8391" cy:directed="1"/>
      <edge id="10372" label="O35526 (pp) O08599" source="8298" target="8643" cy:directed="1"/>
      <edge id="10371" label="O35526 (pp) P60879" source="8298" target="8350" cy:directed="1"/>
      <edge id="10370" label="O35526 (pp) P63040" source="8298" target="8430" cy:directed="1"/>
      <edge id="10369" label="O35526 (pp) Q62442" source="8298" target="8302" cy:directed="1"/>
      <edge id="10368" label="Q8R5M8 (pp) O70589" source="8297" target="8533" cy:directed="1"/>
      <edge id="10367" label="Q9WV92 (pp) P12023" source="8296" target="8294" cy:directed="1"/>
      <edge id="10366" label="Q9WV92 (pp) Q8R5M8" source="8296" target="8297" cy:directed="1"/>
      <edge id="10365" label="P62814 (pp) Q9Z1G4" source="8295" target="8244" cy:directed="1"/>
      <edge id="10364" label="P62814 (pp) Q9WTT4" source="8295" target="8458" cy:directed="1"/>
      <edge id="10363" label="P62814 (pp) P50518" source="8295" target="8338" cy:directed="1"/>
      <edge id="10362" label="P62814 (pp) Q91VM9" source="8295" target="8375" cy:directed="1"/>
      <edge id="10361" label="P62814 (pp) P63082" source="8295" target="8417" cy:directed="1"/>
      <edge id="10360" label="P62814 (pp) Q9Z1G3" source="8295" target="8193" cy:directed="1"/>
      <edge id="10359" label="P62814 (pp) Q9DC69" source="8295" target="8376" cy:directed="1"/>
      <edge id="10358" label="P62814 (pp) P57746" source="8295" target="8261" cy:directed="1"/>
      <edge id="10357" label="P62814 (pp) Q8BVE3" source="8295" target="8339" cy:directed="1"/>
      <edge id="10356" label="P62814 (pp) P50516" source="8295" target="8262" cy:directed="1"/>
      <edge id="10355" label="P62814 (pp) P51863" source="8295" target="8192" cy:directed="1"/>
      <edge id="10354" label="P12023 (pp) P61264" source="8294" target="8436" cy:directed="1"/>
      <edge id="10353" label="P12023 (pp) P63017" source="8294" target="8389" cy:directed="1"/>
      <edge id="10352" label="P12023 (pp) P11627" source="8294" target="8530" cy:directed="1"/>
      <edge id="10351" label="P12023 (pp) Q61316" source="8294" target="8710" cy:directed="1"/>
      <edge id="10350" label="P12023 (pp) Q9CQV8" source="8294" target="8326" cy:directed="1"/>
      <edge id="10349" label="P12023 (pp) Q9Z1G4" source="8294" target="8244" cy:directed="1"/>
      <edge id="10348" label="P12023 (pp) Q68FD5" source="8294" target="8345" cy:directed="1"/>
      <edge id="10347" label="P12023 (pp) P01831" source="8294" target="8588" cy:directed="1"/>
      <edge id="10346" label="P12023 (pp) Q62420" source="8294" target="8440" cy:directed="1"/>
      <edge id="10345" label="P12023 (pp) P97300" source="8294" target="8713" cy:directed="1"/>
      <edge id="10344" label="P12023 (pp) O55042" source="8294" target="8585" cy:directed="1"/>
      <edge id="10343" label="P12023 (pp) P60879" source="8294" target="8350" cy:directed="1"/>
      <edge id="10342" label="P12023 (pp) P46660" source="8294" target="8370" cy:directed="1"/>
      <edge id="10341" label="P12023 (pp) Q812A2" source="8294" target="8769" cy:directed="1"/>
      <edge id="10340" label="P12023 (pp) O54991" source="8294" target="8579" cy:directed="1"/>
      <edge id="10339" label="P12023 (pp) P28652" source="8294" target="8545" cy:directed="1"/>
      <edge id="10338" label="P12023 (pp) Q91ZZ3" source="8294" target="8767" cy:directed="1"/>
      <edge id="10337" label="P12023 (pp) P57780" source="8294" target="8703" cy:directed="1"/>
      <edge id="10336" label="P12023 (pp) P46096" source="8294" target="8659" cy:directed="1"/>
      <edge id="10335" label="P12023 (pp) P62821" source="8294" target="8617" cy:directed="1"/>
      <edge id="10334" label="P12023 (pp) P08551" source="8294" target="8684" cy:directed="1"/>
      <edge id="10333" label="P12023 (pp) P12960" source="8294" target="8688" cy:directed="1"/>
      <edge id="10332" label="P12023 (pp) P39053" source="8294" target="8466" cy:directed="1"/>
      <edge id="10331" label="P12023 (pp) O08599" source="8294" target="8643" cy:directed="1"/>
      <edge id="10330" label="P12023 (pp) P68510" source="8294" target="8182" cy:directed="1"/>
      <edge id="10329" label="P12023 (pp) P60710" source="8294" target="8311" cy:directed="1"/>
      <edge id="10328" label="P12023 (pp) P63101" source="8294" target="8448" cy:directed="1"/>
      <edge id="10327" label="P12023 (pp) Q9JIS5" source="8294" target="8562" cy:directed="1"/>
      <edge id="10326" label="P12023 (pp) P13595" source="8294" target="8531" cy:directed="1"/>
      <edge id="10325" label="P12023 (pp) O88737" source="8294" target="8464" cy:directed="1"/>
      <edge id="10324" label="P12023 (pp) P61982" source="8294" target="8478" cy:directed="1"/>
      <edge id="10323" label="P12023 (pp) P07901" source="8294" target="8477" cy:directed="1"/>
      <edge id="10322" label="P12023 (pp) O88935" source="8294" target="8400" cy:directed="1"/>
      <edge id="10321" label="P12023 (pp) Q64332" source="8294" target="8567" cy:directed="1"/>
      <edge id="10320" label="P12023 (pp) P56564" source="8294" target="8637" cy:directed="1"/>
      <edge id="10319" label="P12023 (pp) P35564" source="8294" target="8656" cy:directed="1"/>
      <edge id="10318" label="P12023 (pp) Q60932" source="8294" target="8575" cy:directed="1"/>
      <edge id="10317" label="P12023 (pp) Q61548" source="8294" target="8387" cy:directed="1"/>
      <edge id="10316" label="P12023 (pp) Q9D6F9" source="8294" target="8596" cy:directed="1"/>
      <edge id="10315" label="P12023 (pp) P62259" source="8294" target="8194" cy:directed="1"/>
      <edge id="10314" label="P12023 (pp) Q810U3" source="8294" target="8630" cy:directed="1"/>
      <edge id="10313" label="P12023 (pp) Q9Z1G3" source="8294" target="8193" cy:directed="1"/>
      <edge id="10312" label="P12023 (pp) Q62277" source="8294" target="8323" cy:directed="1"/>
      <edge id="10311" label="P12023 (pp) Q9JHU4" source="8294" target="8371" cy:directed="1"/>
      <edge id="10310" label="P12023 (pp) Q8VDN2" source="8294" target="8453" cy:directed="1"/>
      <edge id="10309" label="P12023 (pp) P68254" source="8294" target="8549" cy:directed="1"/>
      <edge id="10308" label="P12023 (pp) O08756" source="8294" target="8352" cy:directed="1"/>
      <edge id="10307" label="P12023 (pp) O35526" source="8294" target="8298" cy:directed="1"/>
      <edge id="10306" label="P12023 (pp) P63011" source="8294" target="8516" cy:directed="1"/>
      <edge id="10305" label="P12023 (pp) P06837" source="8294" target="8476" cy:directed="1"/>
      <edge id="10304" label="P12023 (pp) Q9CZT8" source="8294" target="8407" cy:directed="1"/>
      <edge id="10303" label="P12023 (pp) P62823" source="8294" target="8401" cy:directed="1"/>
      <edge id="10302" label="P12023 (pp) P63044" source="8294" target="8369" cy:directed="1"/>
      <edge id="10301" label="P12023 (pp) P04925" source="8294" target="8354" cy:directed="1"/>
      <edge id="10300" label="P12023 (pp) Q9WV18" source="8294" target="8299" cy:directed="1"/>
      <edge id="10299" label="P12023 (pp) P46460" source="8294" target="8252" cy:directed="1"/>
      <edge id="10298" label="P61922 (pp) Q9EQ20" source="8293" target="8331" cy:directed="1"/>
      <edge id="10297" label="P61922 (pp) P15105" source="8293" target="8251" cy:directed="1"/>
      <edge id="10296" label="P61922 (pp) Q9DBF1" source="8293" target="8451" cy:directed="1"/>
      <edge id="10295" label="P48320 (pp) P15105" source="8292" target="8251" cy:directed="1"/>
      <edge id="10294" label="P48320 (pp) P61922" source="8292" target="8293" cy:directed="1"/>
      <edge id="10293" label="P17710 (pp) Q9WUA3" source="8291" target="8479" cy:directed="1"/>
      <edge id="10292" label="P05064 (pp) P05063" source="8290" target="8481" cy:directed="1"/>
      <edge id="10291" label="P05064 (pp) Q61735" source="8290" target="8336" cy:directed="1"/>
      <edge id="10290" label="P05064 (pp) P17182" source="8290" target="8484" cy:directed="1"/>
      <edge id="10289" label="P05064 (pp) Q9WUA3" source="8290" target="8479" cy:directed="1"/>
      <edge id="10288" label="P05064 (pp) P17710" source="8290" target="8291" cy:directed="1"/>
      <edge id="10287" label="P11499 (pp) Q9CR16" source="8289" target="8704" cy:directed="1"/>
      <edge id="10286" label="P11499 (pp) P60710" source="8289" target="8311" cy:directed="1"/>
      <edge id="10285" label="P11499 (pp) P63037" source="8289" target="8248" cy:directed="1"/>
      <edge id="10284" label="P11499 (pp) P63038" source="8289" target="8216" cy:directed="1"/>
      <edge id="10283" label="P11499 (pp) Q60864" source="8289" target="8343" cy:directed="1"/>
      <edge id="10282" label="P11499 (pp) P62259" source="8289" target="8194" cy:directed="1"/>
      <edge id="10281" label="Q8K1Z0 (pp) Q9ERS2" source="8288" target="8308" cy:directed="1"/>
      <edge id="10280" label="Q8K1Z0 (pp) Q9D6J6" source="8288" target="8176" cy:directed="1"/>
      <edge id="10279" label="Q8K1Z0 (pp) Q9WUM5" source="8288" target="8245" cy:directed="1"/>
      <edge id="10278" label="Q8K1Z0 (pp) Q9DCJ5" source="8288" target="8349" cy:directed="1"/>
      <edge id="10277" label="P62331 (pp) O70161" source="8287" target="8277" cy:directed="1"/>
      <edge id="10276" label="Q99LX0 (pp) Q9CQH3" source="8286" target="8209" cy:directed="1"/>
      <edge id="10275" label="Q99LX0 (pp) Q91VR2" source="8286" target="8232" cy:directed="1"/>
      <edge id="10274" label="Q99LX0 (pp) O08756" source="8286" target="8352" cy:directed="1"/>
      <edge id="10273" label="Q99LX0 (pp) O55042" source="8286" target="8585" cy:directed="1"/>
      <edge id="10272" label="Q99LX0 (pp) Q9D6J6" source="8286" target="8176" cy:directed="1"/>
      <edge id="10271" label="Q99LX0 (pp) O09111" source="8286" target="8180" cy:directed="1"/>
      <edge id="10270" label="Q99LX0 (pp) Q62277" source="8286" target="8323" cy:directed="1"/>
      <edge id="10269" label="Q8BGH2 (pp) Q91YT0" source="8285" target="8348" cy:directed="1"/>
      <edge id="10268" label="Q8BGH2 (pp) Q9WUM5" source="8285" target="8245" cy:directed="1"/>
      <edge id="10267" label="Q8BGH2 (pp) Q9DCJ5" source="8285" target="8349" cy:directed="1"/>
      <edge id="10266" label="Q8BGH2 (pp) Q9CRB9" source="8285" target="8619" cy:directed="1"/>
      <edge id="10265" label="Q8BGH2 (pp) P97807" source="8285" target="8309" cy:directed="1"/>
      <edge id="10264" label="Q8BGH2 (pp) O88441" source="8285" target="8264" cy:directed="1"/>
      <edge id="10263" label="Q8BGH2 (pp) Q9QYA2" source="8285" target="8730" cy:directed="1"/>
      <edge id="10262" label="Q8BGH2 (pp) Q9DC69" source="8285" target="8376" cy:directed="1"/>
      <edge id="10261" label="Q8BGH2 (pp) Q9CZ13" source="8285" target="8218" cy:directed="1"/>
      <edge id="10260" label="Q8BGH2 (pp) Q8CAQ8" source="8285" target="8522" cy:directed="1"/>
      <edge id="10259" label="Q8BGH2 (pp) Q8BH95" source="8285" target="8217" cy:directed="1"/>
      <edge id="10258" label="Q8BGH2 (pp) Q99LX0" source="8285" target="8286" cy:directed="1"/>
      <edge id="10257" label="Q99LC5 (pp) Q9DC69" source="8284" target="8376" cy:directed="1"/>
      <edge id="10256" label="Q99LC5 (pp) O88441" source="8284" target="8264" cy:directed="1"/>
      <edge id="10255" label="Q99LC5 (pp) Q9CR68" source="8284" target="8236" cy:directed="1"/>
      <edge id="10254" label="Q99LC5 (pp) Q9WUM5" source="8284" target="8245" cy:directed="1"/>
      <edge id="10253" label="Q99LC5 (pp) Q8BWT1" source="8284" target="8280" cy:directed="1"/>
      <edge id="10252" label="Q99LC5 (pp) Q9Z0X1" source="8284" target="8519" cy:directed="1"/>
      <edge id="10251" label="Q99LC5 (pp) Q91YT0" source="8284" target="8348" cy:directed="1"/>
      <edge id="10250" label="Q99LC5 (pp) O08756" source="8284" target="8352" cy:directed="1"/>
      <edge id="10249" label="Q99LC5 (pp) Q99JY0" source="8284" target="8353" cy:directed="1"/>
      <edge id="10248" label="Q99LC5 (pp) Q9DBL1" source="8284" target="8420" cy:directed="1"/>
      <edge id="10247" label="Q99LC5 (pp) Q91VR2" source="8284" target="8232" cy:directed="1"/>
      <edge id="10246" label="Q99LC5 (pp) Q80U28" source="8284" target="8628" cy:directed="1"/>
      <edge id="10245" label="Q99LC5 (pp) Q9CQH3" source="8284" target="8209" cy:directed="1"/>
      <edge id="10244" label="Q99LC5 (pp) Q91ZJ5" source="8284" target="8583" cy:directed="1"/>
      <edge id="10243" label="Q99LC5 (pp) Q6PB66" source="8284" target="8467" cy:directed="1"/>
      <edge id="10242" label="Q99LC5 (pp) Q9DCJ5" source="8284" target="8349" cy:directed="1"/>
      <edge id="10241" label="Q99LC5 (pp) Q9D6J6" source="8284" target="8176" cy:directed="1"/>
      <edge id="10240" label="Q99LC5 (pp) P50544" source="8284" target="8428" cy:directed="1"/>
      <edge id="10239" label="Q99LC5 (pp) O09111" source="8284" target="8180" cy:directed="1"/>
      <edge id="10238" label="Q61425 (pp) Q9EQ20" source="8283" target="8331" cy:directed="1"/>
      <edge id="10237" label="Q61425 (pp) Q8QZT1" source="8283" target="8526" cy:directed="1"/>
      <edge id="10236" label="Q61425 (pp) P47738" source="8283" target="8274" cy:directed="1"/>
      <edge id="10235" label="Q61425 (pp) O08756" source="8283" target="8352" cy:directed="1"/>
      <edge id="10234" label="Q61425 (pp) Q99JY0" source="8283" target="8353" cy:directed="1"/>
      <edge id="10233" label="Q61425 (pp) Q8BWT1" source="8283" target="8280" cy:directed="1"/>
      <edge id="10232" label="Q61425 (pp) Q9CQ62" source="8283" target="8254" cy:directed="1"/>
      <edge id="10231" label="Q61425 (pp) Q8BMS1" source="8283" target="8485" cy:directed="1"/>
      <edge id="10230" label="Q61425 (pp) Q9CZS1" source="8283" target="8381" cy:directed="1"/>
      <edge id="10229" label="Q61425 (pp) Q9D0K2" source="8283" target="8246" cy:directed="1"/>
      <edge id="10228" label="Q61425 (pp) Q9DBL1" source="8283" target="8420" cy:directed="1"/>
      <edge id="10227" label="Q61425 (pp) Q9WUM5" source="8283" target="8245" cy:directed="1"/>
      <edge id="10226" label="Q61425 (pp) Q99LC5" source="8283" target="8284" cy:directed="1"/>
      <edge id="10225" label="P12787 (pp) P56480" source="8282" target="8227" cy:directed="1"/>
      <edge id="10224" label="P12787 (pp) Q06185" source="8282" target="8240" cy:directed="1"/>
      <edge id="10223" label="P12787 (pp) Q9CXZ1" source="8282" target="8365" cy:directed="1"/>
      <edge id="10222" label="P12787 (pp) Q9CQZ6" source="8282" target="8200" cy:directed="1"/>
      <edge id="10221" label="P12787 (pp) P19536" source="8282" target="8342" cy:directed="1"/>
      <edge id="10220" label="P12787 (pp) P43024" source="8282" target="8441" cy:directed="1"/>
      <edge id="10219" label="P12787 (pp) Q9DB77" source="8282" target="8374" cy:directed="1"/>
      <edge id="10218" label="P12787 (pp) Q9CQA3" source="8282" target="8281" cy:directed="1"/>
      <edge id="10217" label="P12787 (pp) Q9D855" source="8282" target="8372" cy:directed="1"/>
      <edge id="10216" label="P12787 (pp) Q03265" source="8282" target="8181" cy:directed="1"/>
      <edge id="10215" label="P12787 (pp) P09671" source="8282" target="8413" cy:directed="1"/>
      <edge id="10214" label="P12787 (pp) Q9CQH3" source="8282" target="8209" cy:directed="1"/>
      <edge id="10213" label="P12787 (pp) Q9DCX2" source="8282" target="8335" cy:directed="1"/>
      <edge id="10212" label="P12787 (pp) Q99LC3" source="8282" target="8220" cy:directed="1"/>
      <edge id="10211" label="P12787 (pp) Q91VR2" source="8282" target="8232" cy:directed="1"/>
      <edge id="10210" label="P12787 (pp) Q9CQ54" source="8282" target="8201" cy:directed="1"/>
      <edge id="10209" label="P12787 (pp) Q9DC70" source="8282" target="8241" cy:directed="1"/>
      <edge id="10208" label="P12787 (pp) Q9CPQ1" source="8282" target="8573" cy:directed="1"/>
      <edge id="10207" label="P12787 (pp) Q9CQJ8" source="8282" target="8239" cy:directed="1"/>
      <edge id="10206" label="P12787 (pp) Q9CQ69" source="8282" target="8203" cy:directed="1"/>
      <edge id="10205" label="P12787 (pp) Q9D6J5" source="8282" target="8456" cy:directed="1"/>
      <edge id="10204" label="P12787 (pp) Q9D0M3" source="8282" target="8219" cy:directed="1"/>
      <edge id="10203" label="P12787 (pp) Q9DCJ5" source="8282" target="8349" cy:directed="1"/>
      <edge id="10202" label="P12787 (pp) Q9CQZ5" source="8282" target="8175" cy:directed="1"/>
      <edge id="10201" label="P12787 (pp) P00405" source="8282" target="8638" cy:directed="1"/>
      <edge id="10200" label="P12787 (pp) Q9DB20" source="8282" target="8208" cy:directed="1"/>
      <edge id="10199" label="P12787 (pp) Q9D6J6" source="8282" target="8176" cy:directed="1"/>
      <edge id="10198" label="P12787 (pp) Q9CQQ7" source="8282" target="8378" cy:directed="1"/>
      <edge id="10197" label="P12787 (pp) P19783" source="8282" target="8214" cy:directed="1"/>
      <edge id="10196" label="P12787 (pp) Q9ERS2" source="8282" target="8308" cy:directed="1"/>
      <edge id="10195" label="P12787 (pp) P56391" source="8282" target="8300" cy:directed="1"/>
      <edge id="10194" label="P12787 (pp) Q9DCT2" source="8282" target="8202" cy:directed="1"/>
      <edge id="10193" label="P12787 (pp) P97450" source="8282" target="8399" cy:directed="1"/>
      <edge id="10192" label="P12787 (pp) Q9DCW4" source="8282" target="8249" cy:directed="1"/>
      <edge id="10191" label="P12787 (pp) Q9DC69" source="8282" target="8376" cy:directed="1"/>
      <edge id="10190" label="P12787 (pp) P17665" source="8282" target="8524" cy:directed="1"/>
      <edge id="10189" label="P12787 (pp) Q8VEM8" source="8282" target="8318" cy:directed="1"/>
      <edge id="10188" label="P12787 (pp) Q7TMF3" source="8282" target="8334" cy:directed="1"/>
      <edge id="10187" label="P12787 (pp) Q8K3J1" source="8282" target="8373" cy:directed="1"/>
      <edge id="10186" label="P12787 (pp) Q9D3D9" source="8282" target="8179" cy:directed="1"/>
      <edge id="10185" label="P12787 (pp) Q99LC5" source="8282" target="8284" cy:directed="1"/>
      <edge id="10184" label="P12787 (pp) Q9DCS9" source="8282" target="8235" cy:directed="1"/>
      <edge id="10183" label="P12787 (pp) Q9D6R2" source="8282" target="8205" cy:directed="1"/>
      <edge id="10182" label="P12787 (pp) P52503" source="8282" target="8321" cy:directed="1"/>
      <edge id="10181" label="P12787 (pp) Q9CR68" source="8282" target="8236" cy:directed="1"/>
      <edge id="10180" label="Q9CQA3 (pp) Q60597" source="8281" target="8480" cy:directed="1"/>
      <edge id="10179" label="Q9CQA3 (pp) P08249" source="8281" target="8204" cy:directed="1"/>
      <edge id="10178" label="Q9CQA3 (pp) Q9CQJ8" source="8281" target="8239" cy:directed="1"/>
      <edge id="10177" label="Q9CQA3 (pp) Q9ERS2" source="8281" target="8308" cy:directed="1"/>
      <edge id="10176" label="Q9CQA3 (pp) P99029" source="8281" target="8325" cy:directed="1"/>
      <edge id="10175" label="Q9CQA3 (pp) P19536" source="8281" target="8342" cy:directed="1"/>
      <edge id="10174" label="Q9CQA3 (pp) Q99LX0" source="8281" target="8286" cy:directed="1"/>
      <edge id="10173" label="Q9CQA3 (pp) Q9D3D9" source="8281" target="8179" cy:directed="1"/>
      <edge id="10172" label="Q9CQA3 (pp) O09111" source="8281" target="8180" cy:directed="1"/>
      <edge id="10171" label="Q9CQA3 (pp) P43024" source="8281" target="8441" cy:directed="1"/>
      <edge id="10170" label="Q9CQA3 (pp) P17751" source="8281" target="8266" cy:directed="1"/>
      <edge id="10169" label="Q9CQA3 (pp) Q9CQ69" source="8281" target="8203" cy:directed="1"/>
      <edge id="10168" label="Q9CQA3 (pp) Q9DC70" source="8281" target="8241" cy:directed="1"/>
      <edge id="10167" label="Q9CQA3 (pp) Q9D6R2" source="8281" target="8205" cy:directed="1"/>
      <edge id="10166" label="Q9CQA3 (pp) P19783" source="8281" target="8214" cy:directed="1"/>
      <edge id="10165" label="Q9CQA3 (pp) Q91WD5" source="8281" target="8315" cy:directed="1"/>
      <edge id="10164" label="Q9CQA3 (pp) Q9CPP6" source="8281" target="8250" cy:directed="1"/>
      <edge id="10163" label="Q9CQA3 (pp) Q9DCD0" source="8281" target="8191" cy:directed="1"/>
      <edge id="10162" label="Q9CQA3 (pp) P97450" source="8281" target="8399" cy:directed="1"/>
      <edge id="10161" label="Q9CQA3 (pp) P56480" source="8281" target="8227" cy:directed="1"/>
      <edge id="10160" label="Q9CQA3 (pp) Q9DCX2" source="8281" target="8335" cy:directed="1"/>
      <edge id="10159" label="Q9CQA3 (pp) Q91YT0" source="8281" target="8348" cy:directed="1"/>
      <edge id="10158" label="Q9CQA3 (pp) Q8VEM8" source="8281" target="8318" cy:directed="1"/>
      <edge id="10157" label="Q9CQA3 (pp) Q64521" source="8281" target="8394" cy:directed="1"/>
      <edge id="10156" label="Q9CQA3 (pp) Q61425" source="8281" target="8283" cy:directed="1"/>
      <edge id="10155" label="Q9CQA3 (pp) Q91VR2" source="8281" target="8232" cy:directed="1"/>
      <edge id="10154" label="Q9CQA3 (pp) Q03265" source="8281" target="8181" cy:directed="1"/>
      <edge id="10153" label="Q9CQA3 (pp) Q7TMF3" source="8281" target="8334" cy:directed="1"/>
      <edge id="10152" label="Q9CQA3 (pp) Q9CQQ7" source="8281" target="8378" cy:directed="1"/>
      <edge id="10151" label="Q9CQA3 (pp) Q99LC5" source="8281" target="8284" cy:directed="1"/>
      <edge id="10150" label="Q9CQA3 (pp) Q9CQZ5" source="8281" target="8175" cy:directed="1"/>
      <edge id="10149" label="Q9CQA3 (pp) P20108" source="8281" target="8396" cy:directed="1"/>
      <edge id="10148" label="Q9CQA3 (pp) Q9D6J6" source="8281" target="8176" cy:directed="1"/>
      <edge id="10147" label="Q9CQA3 (pp) Q91VD9" source="8281" target="8234" cy:directed="1"/>
      <edge id="10146" label="Q9CQA3 (pp) Q9CR68" source="8281" target="8236" cy:directed="1"/>
      <edge id="10145" label="Q9CQA3 (pp) Q8K2B3" source="8281" target="8316" cy:directed="1"/>
      <edge id="10144" label="Q9CQA3 (pp) Q9CQ75" source="8281" target="8358" cy:directed="1"/>
      <edge id="10143" label="Q9CQA3 (pp) Q9DB77" source="8281" target="8374" cy:directed="1"/>
      <edge id="10142" label="Q9CQA3 (pp) P56391" source="8281" target="8300" cy:directed="1"/>
      <edge id="10141" label="Q9CQA3 (pp) Q9D6J5" source="8281" target="8456" cy:directed="1"/>
      <edge id="10140" label="Q9CQA3 (pp) Q9WUM5" source="8281" target="8245" cy:directed="1"/>
      <edge id="10139" label="Q9CQA3 (pp) Q9DC69" source="8281" target="8376" cy:directed="1"/>
      <edge id="10138" label="Q9CQA3 (pp) P52503" source="8281" target="8321" cy:directed="1"/>
      <edge id="10137" label="Q9CQA3 (pp) Q9CQH3" source="8281" target="8209" cy:directed="1"/>
      <edge id="10136" label="Q9CQA3 (pp) Q9CPQ1" source="8281" target="8573" cy:directed="1"/>
      <edge id="10135" label="Q9CQA3 (pp) P70404" source="8281" target="8263" cy:directed="1"/>
      <edge id="10134" label="Q9CQA3 (pp) P97807" source="8281" target="8309" cy:directed="1"/>
      <edge id="10133" label="Q9CQA3 (pp) Q9D855" source="8281" target="8372" cy:directed="1"/>
      <edge id="10132" label="Q9CQA3 (pp) Q9DB20" source="8281" target="8208" cy:directed="1"/>
      <edge id="10131" label="Q9CQA3 (pp) Q9CQ62" source="8281" target="8254" cy:directed="1"/>
      <edge id="10130" label="Q9CQA3 (pp) Q99KI0" source="8281" target="8307" cy:directed="1"/>
      <edge id="10129" label="Q9CQA3 (pp) P54071" source="8281" target="8206" cy:directed="1"/>
      <edge id="10128" label="Q9CQA3 (pp) Q9DCJ5" source="8281" target="8349" cy:directed="1"/>
      <edge id="10127" label="Q9CQA3 (pp) Q9D2G2" source="8281" target="8256" cy:directed="1"/>
      <edge id="10126" label="Q9CQA3 (pp) Q9CQZ6" source="8281" target="8200" cy:directed="1"/>
      <edge id="10125" label="Q9CQA3 (pp) Q9DCS9" source="8281" target="8235" cy:directed="1"/>
      <edge id="10124" label="Q9CQA3 (pp) Q9Z1P6" source="8281" target="8268" cy:directed="1"/>
      <edge id="10123" label="Q9CQA3 (pp) Q9Z2I9" source="8281" target="8427" cy:directed="1"/>
      <edge id="10122" label="Q9CQA3 (pp) Q8K3J1" source="8281" target="8373" cy:directed="1"/>
      <edge id="10121" label="Q9CQA3 (pp) Q06185" source="8281" target="8240" cy:directed="1"/>
      <edge id="10120" label="Q9CQA3 (pp) Q9CZ13" source="8281" target="8218" cy:directed="1"/>
      <edge id="10119" label="Q9CQA3 (pp) Q9D0M3" source="8281" target="8219" cy:directed="1"/>
      <edge id="10118" label="Q8BWT1 (pp) Q91ZA3" source="8280" target="8446" cy:directed="1"/>
      <edge id="10117" label="Q8BWT1 (pp) O08756" source="8280" target="8352" cy:directed="1"/>
      <edge id="10116" label="Q8BWT1 (pp) Q9WUM5" source="8280" target="8245" cy:directed="1"/>
      <edge id="10115" label="Q8BWT1 (pp) Q8BMS1" source="8280" target="8485" cy:directed="1"/>
      <edge id="10114" label="Q8BWT1 (pp) Q99JY0" source="8280" target="8353" cy:directed="1"/>
      <edge id="10113" label="Q8BWT1 (pp) Q9EQ20" source="8280" target="8331" cy:directed="1"/>
      <edge id="10112" label="Q8BWT1 (pp) Q9DBL1" source="8280" target="8420" cy:directed="1"/>
      <edge id="10111" label="Q8BWT1 (pp) Q9D0K2" source="8280" target="8246" cy:directed="1"/>
      <edge id="10110" label="Q921G7 (pp) Q99LC5" source="8279" target="8284" cy:directed="1"/>
      <edge id="10109" label="Q921G7 (pp) Q9CQ62" source="8279" target="8254" cy:directed="1"/>
      <edge id="10108" label="Q921G7 (pp) Q80U28" source="8279" target="8628" cy:directed="1"/>
      <edge id="10107" label="Q921G7 (pp) Q9WUM5" source="8279" target="8245" cy:directed="1"/>
      <edge id="10106" label="Q921G7 (pp) Q99JY0" source="8279" target="8353" cy:directed="1"/>
      <edge id="10105" label="Q921G7 (pp) Q9D6J6" source="8279" target="8176" cy:directed="1"/>
      <edge id="10104" label="Q921G7 (pp) Q8BMS1" source="8279" target="8485" cy:directed="1"/>
      <edge id="10103" label="Q921G7 (pp) Q61425" source="8279" target="8283" cy:directed="1"/>
      <edge id="10102" label="Q921G7 (pp) Q8BWT1" source="8279" target="8280" cy:directed="1"/>
      <edge id="10101" label="Q9Z1B3 (pp) P35438" source="8278" target="8184" cy:directed="1"/>
      <edge id="10100" label="Q9Z1B3 (pp) Q01097" source="8278" target="8173" cy:directed="1"/>
      <edge id="10099" label="O70161 (pp) Q71LX4" source="8277" target="8666" cy:directed="1"/>
      <edge id="10098" label="O70161 (pp) P17426" source="8277" target="8260" cy:directed="1"/>
      <edge id="10097" label="O70161 (pp) Q9Z1B3" source="8277" target="8278" cy:directed="1"/>
      <edge id="10096" label="Q6PER3 (pp) O08788" source="8276" target="8306" cy:directed="1"/>
      <edge id="10095" label="P63005 (pp) P20357" source="8275" target="8589" cy:directed="1"/>
      <edge id="10094" label="P63005 (pp) Q99KJ8" source="8275" target="8305" cy:directed="1"/>
      <edge id="10093" label="P63005 (pp) O08788" source="8275" target="8306" cy:directed="1"/>
      <edge id="10092" label="P63005 (pp) Q6PER3" source="8275" target="8276" cy:directed="1"/>
      <edge id="10091" label="P47738 (pp) Q8BW75" source="8274" target="8642" cy:directed="1"/>
      <edge id="10090" label="P47738 (pp) Q9EQ20" source="8274" target="8331" cy:directed="1"/>
      <edge id="10089" label="P47738 (pp) Q8CHT0" source="8274" target="8471" cy:directed="1"/>
      <edge id="10088" label="P47738 (pp) P61922" source="8274" target="8293" cy:directed="1"/>
      <edge id="10087" label="Q64133 (pp) Q9DBF1" source="8273" target="8451" cy:directed="1"/>
      <edge id="10086" label="Q64133 (pp) Q9CZS1" source="8273" target="8381" cy:directed="1"/>
      <edge id="10085" label="Q64133 (pp) Q9JLJ2" source="8273" target="8231" cy:directed="1"/>
      <edge id="10084" label="Q64133 (pp) P47738" source="8273" target="8274" cy:directed="1"/>
      <edge id="10083" label="P48771 (pp) P43024" source="8272" target="8441" cy:directed="1"/>
      <edge id="10082" label="P48771 (pp) Q9CQ69" source="8272" target="8203" cy:directed="1"/>
      <edge id="10081" label="P48771 (pp) Q9CQH3" source="8272" target="8209" cy:directed="1"/>
      <edge id="10080" label="P48771 (pp) Q9D6J6" source="8272" target="8176" cy:directed="1"/>
      <edge id="10079" label="P48771 (pp) Q06185" source="8272" target="8240" cy:directed="1"/>
      <edge id="10078" label="P48771 (pp) Q99LX0" source="8272" target="8286" cy:directed="1"/>
      <edge id="10077" label="P48771 (pp) P56391" source="8272" target="8300" cy:directed="1"/>
      <edge id="10076" label="P48771 (pp) Q91VR2" source="8272" target="8232" cy:directed="1"/>
      <edge id="10075" label="P48771 (pp) Q9DC69" source="8272" target="8376" cy:directed="1"/>
      <edge id="10074" label="O70325 (pp) P99029" source="8271" target="8325" cy:directed="1"/>
      <edge id="10073" label="O70325 (pp) Q9ERS2" source="8271" target="8308" cy:directed="1"/>
      <edge id="10072" label="O70325 (pp) Q9D3D9" source="8271" target="8179" cy:directed="1"/>
      <edge id="10071" label="O70325 (pp) Q99LX0" source="8271" target="8286" cy:directed="1"/>
      <edge id="10070" label="P62812 (pp) P22723" source="8270" target="8625" cy:directed="1"/>
      <edge id="10069" label="P62812 (pp) P63328" source="8270" target="8584" cy:directed="1"/>
      <edge id="10068" label="P63137 (pp) P62812" source="8269" target="8270" cy:directed="1"/>
      <edge id="10067" label="Q9Z1P6 (pp) O09111" source="8268" target="8180" cy:directed="1"/>
      <edge id="10066" label="Q9Z1P6 (pp) Q9DCX2" source="8268" target="8335" cy:directed="1"/>
      <edge id="10065" label="Q9Z1P6 (pp) Q91YT0" source="8268" target="8348" cy:directed="1"/>
      <edge id="10064" label="Q9Z1P6 (pp) Q9DCS9" source="8268" target="8235" cy:directed="1"/>
      <edge id="10063" label="Q9Z1P6 (pp) O08756" source="8268" target="8352" cy:directed="1"/>
      <edge id="10062" label="Q9Z1P6 (pp) Q06185" source="8268" target="8240" cy:directed="1"/>
      <edge id="10061" label="Q9Z1P6 (pp) Q8K3J1" source="8268" target="8373" cy:directed="1"/>
      <edge id="10060" label="Q9Z1P6 (pp) Q9DCJ5" source="8268" target="8349" cy:directed="1"/>
      <edge id="10059" label="Q9Z1P6 (pp) Q9CQH3" source="8268" target="8209" cy:directed="1"/>
      <edge id="10058" label="Q9Z1P6 (pp) Q9CQ69" source="8268" target="8203" cy:directed="1"/>
      <edge id="10057" label="Q9Z1P6 (pp) Q99LX0" source="8268" target="8286" cy:directed="1"/>
      <edge id="10056" label="Q9Z1P6 (pp) Q9CPQ8" source="8268" target="8233" cy:directed="1"/>
      <edge id="10055" label="Q9Z1P6 (pp) Q9DC69" source="8268" target="8376" cy:directed="1"/>
      <edge id="10054" label="Q9Z1P6 (pp) Q9D3D9" source="8268" target="8179" cy:directed="1"/>
      <edge id="10053" label="Q9Z1P6 (pp) Q3UIU2" source="8268" target="8257" cy:directed="1"/>
      <edge id="10052" label="Q9Z1P6 (pp) P56391" source="8268" target="8300" cy:directed="1"/>
      <edge id="10051" label="Q9Z1P6 (pp) Q9ERS2" source="8268" target="8308" cy:directed="1"/>
      <edge id="10050" label="Q9Z1P6 (pp) Q9D6J6" source="8268" target="8176" cy:directed="1"/>
      <edge id="10049" label="P09411 (pp) P06151" source="8267" target="8207" cy:directed="1"/>
      <edge id="10048" label="P09411 (pp) P16858" source="8267" target="8528" cy:directed="1"/>
      <edge id="10047" label="P09411 (pp) P17742" source="8267" target="8228" cy:directed="1"/>
      <edge id="10046" label="P09411 (pp) P17182" source="8267" target="8484" cy:directed="1"/>
      <edge id="10045" label="P09411 (pp) Q9DCD0" source="8267" target="8191" cy:directed="1"/>
      <edge id="10044" label="P17751 (pp) Q91YT0" source="8266" target="8348" cy:directed="1"/>
      <edge id="10043" label="P17751 (pp) Q9R0P5" source="8266" target="8785" cy:directed="1"/>
      <edge id="10042" label="P17751 (pp) P06151" source="8266" target="8207" cy:directed="1"/>
      <edge id="10041" label="P17751 (pp) P52480" source="8266" target="8424" cy:directed="1"/>
      <edge id="10040" label="P17751 (pp) P63101" source="8266" target="8448" cy:directed="1"/>
      <edge id="10039" label="P17751 (pp) Q91VR2" source="8266" target="8232" cy:directed="1"/>
      <edge id="10038" label="P17751 (pp) Q9WUA3" source="8266" target="8479" cy:directed="1"/>
      <edge id="10037" label="P17751 (pp) Q9CR68" source="8266" target="8236" cy:directed="1"/>
      <edge id="10036" label="P17751 (pp) P05064" source="8266" target="8290" cy:directed="1"/>
      <edge id="10035" label="P17751 (pp) Q03265" source="8266" target="8181" cy:directed="1"/>
      <edge id="10034" label="P17751 (pp) P97807" source="8266" target="8309" cy:directed="1"/>
      <edge id="10033" label="P17751 (pp) Q8K3J1" source="8266" target="8373" cy:directed="1"/>
      <edge id="10032" label="P17751 (pp) P99029" source="8266" target="8325" cy:directed="1"/>
      <edge id="10031" label="P17751 (pp) P23506" source="8266" target="8455" cy:directed="1"/>
      <edge id="10030" label="P17751 (pp) Q9WUM5" source="8266" target="8245" cy:directed="1"/>
      <edge id="10029" label="P17751 (pp) P16858" source="8266" target="8528" cy:directed="1"/>
      <edge id="10028" label="P17751 (pp) P47857" source="8266" target="8500" cy:directed="1"/>
      <edge id="10027" label="P17751 (pp) Q64521" source="8266" target="8394" cy:directed="1"/>
      <edge id="10026" label="P17751 (pp) Q9D2G2" source="8266" target="8256" cy:directed="1"/>
      <edge id="10025" label="P17751 (pp) P70296" source="8266" target="8636" cy:directed="1"/>
      <edge id="10024" label="P17751 (pp) Q91VD9" source="8266" target="8234" cy:directed="1"/>
      <edge id="10023" label="P17751 (pp) P56480" source="8266" target="8227" cy:directed="1"/>
      <edge id="10022" label="P17751 (pp) Q9D6J6" source="8266" target="8176" cy:directed="1"/>
      <edge id="10021" label="P17751 (pp) Q9CZ13" source="8266" target="8218" cy:directed="1"/>
      <edge id="10020" label="P17751 (pp) Q93092" source="8266" target="8423" cy:directed="1"/>
      <edge id="10019" label="P17751 (pp) P09411" source="8266" target="8267" cy:directed="1"/>
      <edge id="10018" label="P17751 (pp) Q99LX0" source="8266" target="8286" cy:directed="1"/>
      <edge id="10017" label="P17751 (pp) P17182" source="8266" target="8484" cy:directed="1"/>
      <edge id="10016" label="P17751 (pp) P05063" source="8266" target="8481" cy:directed="1"/>
      <edge id="10015" label="P17751 (pp) P06745" source="8266" target="8433" cy:directed="1"/>
      <edge id="10014" label="Q7TQI3 (pp) P68510" source="8265" target="8182" cy:directed="1"/>
      <edge id="10013" label="O88441 (pp) Q6PB66" source="8264" target="8467" cy:directed="1"/>
      <edge id="10012" label="O88441 (pp) Q9CQH3" source="8264" target="8209" cy:directed="1"/>
      <edge id="10011" label="O88441 (pp) Q9D6J6" source="8264" target="8176" cy:directed="1"/>
      <edge id="10010" label="P70404 (pp) Q9D2G2" source="8263" target="8256" cy:directed="1"/>
      <edge id="10009" label="P70404 (pp) Q60597" source="8263" target="8480" cy:directed="1"/>
      <edge id="10008" label="P70404 (pp) Q9DC69" source="8263" target="8376" cy:directed="1"/>
      <edge id="10007" label="P70404 (pp) Q9WUM5" source="8263" target="8245" cy:directed="1"/>
      <edge id="10006" label="P70404 (pp) Q91VR2" source="8263" target="8232" cy:directed="1"/>
      <edge id="10005" label="P50516 (pp) P08553" source="8262" target="8686" cy:directed="1"/>
      <edge id="10004" label="P50516 (pp) P12382" source="8262" target="8183" cy:directed="1"/>
      <edge id="10003" label="P50516 (pp) Q91VR2" source="8262" target="8232" cy:directed="1"/>
      <edge id="10002" label="P50516 (pp) Q3UHL1" source="8262" target="8574" cy:directed="1"/>
      <edge id="10001" label="P50516 (pp) Q9Z1J3" source="8262" target="8512" cy:directed="1"/>
      <edge id="10000" label="P50516 (pp) Q9Z0E0" source="8262" target="8770" cy:directed="1"/>
      <edge id="9999" label="P50516 (pp) P17426" source="8262" target="8260" cy:directed="1"/>
      <edge id="9998" label="P50516 (pp) O54983" source="8262" target="8682" cy:directed="1"/>
      <edge id="9997" label="P50516 (pp) Q80XN0" source="8262" target="8743" cy:directed="1"/>
      <edge id="9996" label="P50516 (pp) Q99LX0" source="8262" target="8286" cy:directed="1"/>
      <edge id="9995" label="P50516 (pp) P17427" source="8262" target="8259" cy:directed="1"/>
      <edge id="9994" label="P50516 (pp) Q8VD37" source="8262" target="8527" cy:directed="1"/>
      <edge id="9993" label="P50516 (pp) Q9JLM8" source="8262" target="8397" cy:directed="1"/>
      <edge id="9992" label="P50516 (pp) O08539" source="8262" target="8565" cy:directed="1"/>
      <edge id="9991" label="P50516 (pp) P63082" source="8262" target="8417" cy:directed="1"/>
      <edge id="9990" label="P50516 (pp) Q62425" source="8262" target="8514" cy:directed="1"/>
      <edge id="9989" label="P50516 (pp) Q9Z2I0" source="8262" target="8679" cy:directed="1"/>
      <edge id="9988" label="P50516 (pp) O35643" source="8262" target="8648" cy:directed="1"/>
      <edge id="9987" label="P50516 (pp) Q5DQR4" source="8262" target="8640" cy:directed="1"/>
      <edge id="9986" label="P50516 (pp) Q5SQX6" source="8262" target="8572" cy:directed="1"/>
      <edge id="9985" label="P50516 (pp) P47754" source="8262" target="8406" cy:directed="1"/>
      <edge id="9984" label="P50516 (pp) Q9D6R2" source="8262" target="8205" cy:directed="1"/>
      <edge id="9983" label="P50516 (pp) P28660" source="8262" target="8351" cy:directed="1"/>
      <edge id="9982" label="P50516 (pp) P01831" source="8262" target="8588" cy:directed="1"/>
      <edge id="9981" label="P50516 (pp) Q9QYR6" source="8262" target="8577" cy:directed="1"/>
      <edge id="9980" label="P50516 (pp) P46660" source="8262" target="8370" cy:directed="1"/>
      <edge id="9979" label="P50516 (pp) P46460" source="8262" target="8252" cy:directed="1"/>
      <edge id="9978" label="P50516 (pp) Q9D6J6" source="8262" target="8176" cy:directed="1"/>
      <edge id="9977" label="P50516 (pp) P55088" source="8262" target="8504" cy:directed="1"/>
      <edge id="9976" label="P50516 (pp) P53395" source="8262" target="8421" cy:directed="1"/>
      <edge id="9975" label="P50516 (pp) Q7TQF7" source="8262" target="8474" cy:directed="1"/>
      <edge id="9974" label="P50516 (pp) P39053" source="8262" target="8466" cy:directed="1"/>
      <edge id="9973" label="P50516 (pp) Q7TPR4" source="8262" target="8435" cy:directed="1"/>
      <edge id="9972" label="P50516 (pp) P60710" source="8262" target="8311" cy:directed="1"/>
      <edge id="9971" label="P50516 (pp) Q8BPN8" source="8262" target="8416" cy:directed="1"/>
      <edge id="9970" label="P50516 (pp) Q9R0K7" source="8262" target="8392" cy:directed="1"/>
      <edge id="9969" label="P50516 (pp) Q9JHU4" source="8262" target="8371" cy:directed="1"/>
      <edge id="9968" label="P57746 (pp) Q9CQH3" source="8261" target="8209" cy:directed="1"/>
      <edge id="9967" label="P57746 (pp) P63082" source="8261" target="8417" cy:directed="1"/>
      <edge id="9966" label="P57746 (pp) P23506" source="8261" target="8455" cy:directed="1"/>
      <edge id="9965" label="P57746 (pp) Q9WTT4" source="8261" target="8458" cy:directed="1"/>
      <edge id="9964" label="P57746 (pp) Q9Z1G3" source="8261" target="8193" cy:directed="1"/>
      <edge id="9963" label="P57746 (pp) P97450" source="8261" target="8399" cy:directed="1"/>
      <edge id="9962" label="P57746 (pp) Q9CQZ6" source="8261" target="8200" cy:directed="1"/>
      <edge id="9961" label="P57746 (pp) Q9Z1G4" source="8261" target="8244" cy:directed="1"/>
      <edge id="9960" label="P57746 (pp) Q8BVE3" source="8261" target="8339" cy:directed="1"/>
      <edge id="9959" label="P57746 (pp) P50516" source="8261" target="8262" cy:directed="1"/>
      <edge id="9958" label="P17426 (pp) Q8CHC4" source="8260" target="8608" cy:directed="1"/>
      <edge id="9957" label="P17426 (pp) Q80VP1" source="8260" target="8601" cy:directed="1"/>
      <edge id="9956" label="P17426 (pp) O08585" source="8260" target="8576" cy:directed="1"/>
      <edge id="9955" label="P17426 (pp) P62743" source="8260" target="8626" cy:directed="1"/>
      <edge id="9954" label="P17427 (pp) Q9DBG3" source="8259" target="8505" cy:directed="1"/>
      <edge id="9953" label="P17427 (pp) P84091" source="8259" target="8538" cy:directed="1"/>
      <edge id="9952" label="P17427 (pp) Q6IRU5" source="8259" target="8506" cy:directed="1"/>
      <edge id="9951" label="P17427 (pp) Q8CHC4" source="8259" target="8608" cy:directed="1"/>
      <edge id="9950" label="P17427 (pp) P39053" source="8259" target="8466" cy:directed="1"/>
      <edge id="9949" label="P17427 (pp) P62743" source="8259" target="8626" cy:directed="1"/>
      <edge id="9948" label="P17427 (pp) Q80VP1" source="8259" target="8601" cy:directed="1"/>
      <edge id="9947" label="P17427 (pp) O08585" source="8259" target="8576" cy:directed="1"/>
      <edge id="9946" label="P17427 (pp) Q68FD5" source="8259" target="8345" cy:directed="1"/>
      <edge id="9945" label="P17427 (pp) P17426" source="8259" target="8260" cy:directed="1"/>
      <edge id="9944" label="P31938 (pp) P16054" source="8258" target="8412" cy:directed="1"/>
      <edge id="9943" label="P31938 (pp) P35438" source="8258" target="8184" cy:directed="1"/>
      <edge id="9942" label="P31938 (pp) P63085" source="8258" target="8224" cy:directed="1"/>
      <edge id="9941" label="Q3UIU2 (pp) Q9CQH3" source="8257" target="8209" cy:directed="1"/>
      <edge id="9940" label="Q3UIU2 (pp) Q9D6J6" source="8257" target="8176" cy:directed="1"/>
      <edge id="9939" label="Q9D2G2 (pp) Q9D3D9" source="8256" target="8179" cy:directed="1"/>
      <edge id="9938" label="Q9D2G2 (pp) Q60597" source="8256" target="8480" cy:directed="1"/>
      <edge id="9937" label="Q9D2G2 (pp) Q9WUM5" source="8256" target="8245" cy:directed="1"/>
      <edge id="9936" label="Q9D2G2 (pp) Q91VR2" source="8256" target="8232" cy:directed="1"/>
      <edge id="9935" label="Q9CQ62 (pp) P41216" source="8254" target="8597" cy:directed="1"/>
      <edge id="9934" label="Q9CQ62 (pp) P19096" source="8254" target="8655" cy:directed="1"/>
      <edge id="9933" label="Q9CQ62 (pp) Q99LC5" source="8254" target="8284" cy:directed="1"/>
      <edge id="9932" label="Q9CQ62 (pp) Q8BWT1" source="8254" target="8280" cy:directed="1"/>
      <edge id="9931" label="Q9CQ62 (pp) Q99JY0" source="8254" target="8353" cy:directed="1"/>
      <edge id="9930" label="Q08331 (pp) Q01097" source="8253" target="8173" cy:directed="1"/>
      <edge id="9929" label="Q08331 (pp) Q9CQ62" source="8253" target="8254" cy:directed="1"/>
      <edge id="9928" label="P46460 (pp) P63101" source="8252" target="8448" cy:directed="1"/>
      <edge id="9927" label="P46460 (pp) P23819" source="8252" target="8188" cy:directed="1"/>
      <edge id="9926" label="P46460 (pp) P35438" source="8252" target="8184" cy:directed="1"/>
      <edge id="9925" label="P46460 (pp) O35526" source="8252" target="8298" cy:directed="1"/>
      <edge id="9924" label="P46460 (pp) O08599" source="8252" target="8643" cy:directed="1"/>
      <edge id="9923" label="P46460 (pp) Q62442" source="8252" target="8302" cy:directed="1"/>
      <edge id="9922" label="P46460 (pp) Q9CWZ7" source="8252" target="8662" cy:directed="1"/>
      <edge id="9921" label="P46460 (pp) Q01097" source="8252" target="8173" cy:directed="1"/>
      <edge id="9920" label="Q9CPP6 (pp) Q91YT0" source="8250" target="8348" cy:directed="1"/>
      <edge id="9919" label="Q9CPP6 (pp) P43024" source="8250" target="8441" cy:directed="1"/>
      <edge id="9918" label="Q9CPP6 (pp) P56391" source="8250" target="8300" cy:directed="1"/>
      <edge id="9917" label="Q9CPP6 (pp) Q9Z1P6" source="8250" target="8268" cy:directed="1"/>
      <edge id="9916" label="Q9CPP6 (pp) Q9WUM5" source="8250" target="8245" cy:directed="1"/>
      <edge id="9915" label="Q9CPP6 (pp) Q9CQH3" source="8250" target="8209" cy:directed="1"/>
      <edge id="9914" label="Q9CPP6 (pp) Q9D6J5" source="8250" target="8456" cy:directed="1"/>
      <edge id="9913" label="Q9CPP6 (pp) Q99LC5" source="8250" target="8284" cy:directed="1"/>
      <edge id="9912" label="Q9CPP6 (pp) Q9CQ69" source="8250" target="8203" cy:directed="1"/>
      <edge id="9911" label="Q9CPP6 (pp) Q8K3J1" source="8250" target="8373" cy:directed="1"/>
      <edge id="9910" label="Q9CPP6 (pp) Q91VD9" source="8250" target="8234" cy:directed="1"/>
      <edge id="9909" label="Q9CPP6 (pp) Q9CQZ6" source="8250" target="8200" cy:directed="1"/>
      <edge id="9908" label="Q9CPP6 (pp) Q9ERS2" source="8250" target="8308" cy:directed="1"/>
      <edge id="9907" label="Q9CPP6 (pp) Q99LY9" source="8250" target="8221" cy:directed="1"/>
      <edge id="9906" label="Q9CPP6 (pp) Q9DCJ5" source="8250" target="8349" cy:directed="1"/>
      <edge id="9905" label="Q9CPP6 (pp) P48771" source="8250" target="8272" cy:directed="1"/>
      <edge id="9904" label="Q9CPP6 (pp) Q9DCX2" source="8250" target="8335" cy:directed="1"/>
      <edge id="9903" label="Q9CPP6 (pp) Q9DB77" source="8250" target="8374" cy:directed="1"/>
      <edge id="9902" label="Q9CPP6 (pp) Q9D6J6" source="8250" target="8176" cy:directed="1"/>
      <edge id="9901" label="Q9DCW4 (pp) P50544" source="8249" target="8428" cy:directed="1"/>
      <edge id="9900" label="Q9DCW4 (pp) Q8R4N0" source="8249" target="8320" cy:directed="1"/>
      <edge id="9899" label="Q9DCW4 (pp) Q9DC70" source="8249" target="8241" cy:directed="1"/>
      <edge id="9898" label="Q9DCW4 (pp) Q8QZT1" source="8249" target="8526" cy:directed="1"/>
      <edge id="9897" label="Q9DCW4 (pp) Q9D0S9" source="8249" target="8242" cy:directed="1"/>
      <edge id="9896" label="Q9DCW4 (pp) Q9D6J6" source="8249" target="8176" cy:directed="1"/>
      <edge id="9895" label="Q9DCW4 (pp) Q9Z1P6" source="8249" target="8268" cy:directed="1"/>
      <edge id="9894" label="Q9DCW4 (pp) Q61425" source="8249" target="8283" cy:directed="1"/>
      <edge id="9893" label="Q9DCW4 (pp) Q9DCS9" source="8249" target="8235" cy:directed="1"/>
      <edge id="9892" label="Q9DCW4 (pp) Q8BWT1" source="8249" target="8280" cy:directed="1"/>
      <edge id="9891" label="Q9DCW4 (pp) O08756" source="8249" target="8352" cy:directed="1"/>
      <edge id="9890" label="Q9DCW4 (pp) Q9JHI5" source="8249" target="8422" cy:directed="1"/>
      <edge id="9889" label="Q9DCW4 (pp) Q9DCT2" source="8249" target="8202" cy:directed="1"/>
      <edge id="9888" label="Q9DCW4 (pp) Q8BH95" source="8249" target="8217" cy:directed="1"/>
      <edge id="9887" label="Q9DCW4 (pp) Q9CQJ8" source="8249" target="8239" cy:directed="1"/>
      <edge id="9886" label="Q9DCW4 (pp) P52503" source="8249" target="8321" cy:directed="1"/>
      <edge id="9885" label="Q9DCW4 (pp) Q99LC5" source="8249" target="8284" cy:directed="1"/>
      <edge id="9884" label="Q9DCW4 (pp) Q9DC69" source="8249" target="8376" cy:directed="1"/>
      <edge id="9883" label="Q9DCW4 (pp) P19783" source="8249" target="8214" cy:directed="1"/>
      <edge id="9882" label="Q9DCW4 (pp) Q80U28" source="8249" target="8628" cy:directed="1"/>
      <edge id="9881" label="Q9DCW4 (pp) Q99LC3" source="8249" target="8220" cy:directed="1"/>
      <edge id="9880" label="Q9DCW4 (pp) Q921G7" source="8249" target="8279" cy:directed="1"/>
      <edge id="9879" label="Q9DCW4 (pp) Q9DBL1" source="8249" target="8420" cy:directed="1"/>
      <edge id="9878" label="Q9DCW4 (pp) P42125" source="8249" target="8488" cy:directed="1"/>
      <edge id="9877" label="Q9DCW4 (pp) Q9WUM5" source="8249" target="8245" cy:directed="1"/>
      <edge id="9876" label="Q9DCW4 (pp) Q91Z53" source="8249" target="8304" cy:directed="1"/>
      <edge id="9875" label="Q9DCW4 (pp) P17751" source="8249" target="8266" cy:directed="1"/>
      <edge id="9874" label="Q9DCW4 (pp) P08249" source="8249" target="8204" cy:directed="1"/>
      <edge id="9873" label="Q9DCW4 (pp) Q8K3J1" source="8249" target="8373" cy:directed="1"/>
      <edge id="9872" label="Q9DCW4 (pp) Q8BMS1" source="8249" target="8485" cy:directed="1"/>
      <edge id="9871" label="Q9DCW4 (pp) Q9ERS2" source="8249" target="8308" cy:directed="1"/>
      <edge id="9870" label="Q9DCW4 (pp) Q91YT0" source="8249" target="8348" cy:directed="1"/>
      <edge id="9869" label="Q9DCW4 (pp) Q9D6J5" source="8249" target="8456" cy:directed="1"/>
      <edge id="9868" label="Q9DCW4 (pp) O09111" source="8249" target="8180" cy:directed="1"/>
      <edge id="9867" label="Q9DCW4 (pp) Q06185" source="8249" target="8240" cy:directed="1"/>
      <edge id="9866" label="Q9DCW4 (pp) Q9Z2I9" source="8249" target="8427" cy:directed="1"/>
      <edge id="9865" label="Q9DCW4 (pp) Q9CQA3" source="8249" target="8281" cy:directed="1"/>
      <edge id="9864" label="Q9DCW4 (pp) Q8JZN5" source="8249" target="8363" cy:directed="1"/>
      <edge id="9863" label="Q9DCW4 (pp) Q9D3D9" source="8249" target="8179" cy:directed="1"/>
      <edge id="9862" label="Q9DCW4 (pp) Q9DB20" source="8249" target="8208" cy:directed="1"/>
      <edge id="9861" label="Q9DCW4 (pp) P51174" source="8249" target="8361" cy:directed="1"/>
      <edge id="9860" label="Q9DCW4 (pp) P56391" source="8249" target="8300" cy:directed="1"/>
      <edge id="9859" label="Q9DCW4 (pp) Q9DCJ5" source="8249" target="8349" cy:directed="1"/>
      <edge id="9858" label="Q9DCW4 (pp) Q9CPP6" source="8249" target="8250" cy:directed="1"/>
      <edge id="9857" label="P63037 (pp) Q61699" source="8248" target="8687" cy:directed="1"/>
      <edge id="9856" label="P63037 (pp) Q91VR2" source="8248" target="8232" cy:directed="1"/>
      <edge id="9855" label="Q9CQN1 (pp) P63038" source="8247" target="8216" cy:directed="1"/>
      <edge id="9854" label="Q9CQN1 (pp) Q91YT0" source="8247" target="8348" cy:directed="1"/>
      <edge id="9853" label="Q9CQN1 (pp) Q8K3J1" source="8247" target="8373" cy:directed="1"/>
      <edge id="9852" label="Q9CQN1 (pp) P63037" source="8247" target="8248" cy:directed="1"/>
      <edge id="9851" label="Q9WUM5 (pp) Q8VEM8" source="8245" target="8318" cy:directed="1"/>
      <edge id="9850" label="Q9WUM5 (pp) Q60931" source="8245" target="8525" cy:directed="1"/>
      <edge id="9849" label="Q9WUM5 (pp) Q9CQH3" source="8245" target="8209" cy:directed="1"/>
      <edge id="9848" label="Q9WUM5 (pp) Q9ERS2" source="8245" target="8308" cy:directed="1"/>
      <edge id="9847" label="Q9WUM5 (pp) Q99LX0" source="8245" target="8286" cy:directed="1"/>
      <edge id="9846" label="Q9WUM5 (pp) Q60597" source="8245" target="8480" cy:directed="1"/>
      <edge id="9845" label="Q9WUM5 (pp) Q99JY0" source="8245" target="8353" cy:directed="1"/>
      <edge id="9844" label="Q9WUM5 (pp) Q91VR2" source="8245" target="8232" cy:directed="1"/>
      <edge id="9843" label="Q9WUM5 (pp) Q9D6J6" source="8245" target="8176" cy:directed="1"/>
      <edge id="9842" label="Q9WUM5 (pp) P06151" source="8245" target="8207" cy:directed="1"/>
      <edge id="9841" label="Q9WUM5 (pp) Q9DCJ5" source="8245" target="8349" cy:directed="1"/>
      <edge id="9840" label="Q9WUM5 (pp) Q9CQQ7" source="8245" target="8378" cy:directed="1"/>
      <edge id="9839" label="Q9WUM5 (pp) Q9DC69" source="8245" target="8376" cy:directed="1"/>
      <edge id="9838" label="Q9WUM5 (pp) Q9D0K2" source="8245" target="8246" cy:directed="1"/>
      <edge id="9837" label="Q9Z1G4 (pp) Q62277" source="8244" target="8323" cy:directed="1"/>
      <edge id="9836" label="Q9Z1G4 (pp) P63082" source="8244" target="8417" cy:directed="1"/>
      <edge id="9835" label="Q9Z1G4 (pp) Q9WTT4" source="8244" target="8458" cy:directed="1"/>
      <edge id="9834" label="Q9Z1G4 (pp) P50516" source="8244" target="8262" cy:directed="1"/>
      <edge id="9833" label="Q9D1K2 (pp) P50518" source="8243" target="8338" cy:directed="1"/>
      <edge id="9832" label="Q9D1K2 (pp) P57746" source="8243" target="8261" cy:directed="1"/>
      <edge id="9831" label="Q9D1K2 (pp) Q8BVE3" source="8243" target="8339" cy:directed="1"/>
      <edge id="9830" label="Q9D1K2 (pp) Q9Z1P6" source="8243" target="8268" cy:directed="1"/>
      <edge id="9829" label="Q9D1K2 (pp) Q91VM9" source="8243" target="8375" cy:directed="1"/>
      <edge id="9828" label="Q9D1K2 (pp) P50516" source="8243" target="8262" cy:directed="1"/>
      <edge id="9827" label="Q9D1K2 (pp) Q9CQ75" source="8243" target="8358" cy:directed="1"/>
      <edge id="9826" label="Q9D1K2 (pp) P51863" source="8243" target="8192" cy:directed="1"/>
      <edge id="9825" label="Q9D1K2 (pp) Q9CQZ5" source="8243" target="8175" cy:directed="1"/>
      <edge id="9824" label="Q9D1K2 (pp) Q9WTT4" source="8243" target="8458" cy:directed="1"/>
      <edge id="9823" label="Q9D1K2 (pp) Q9Z1G3" source="8243" target="8193" cy:directed="1"/>
      <edge id="9822" label="Q9D1K2 (pp) Q8K3J1" source="8243" target="8373" cy:directed="1"/>
      <edge id="9821" label="Q9D1K2 (pp) P63082" source="8243" target="8417" cy:directed="1"/>
      <edge id="9820" label="Q9D1K2 (pp) P62814" source="8243" target="8295" cy:directed="1"/>
      <edge id="9819" label="Q9D1K2 (pp) Q9Z1G4" source="8243" target="8244" cy:directed="1"/>
      <edge id="9818" label="Q9D0S9 (pp) O08756" source="8242" target="8352" cy:directed="1"/>
      <edge id="9817" label="Q9D0S9 (pp) Q91Z53" source="8242" target="8304" cy:directed="1"/>
      <edge id="9816" label="Q9DC70 (pp) Q9DC69" source="8241" target="8376" cy:directed="1"/>
      <edge id="9815" label="Q9DC70 (pp) Q9CXZ1" source="8241" target="8365" cy:directed="1"/>
      <edge id="9814" label="Q9DC70 (pp) Q06185" source="8241" target="8240" cy:directed="1"/>
      <edge id="9813" label="Q9DC70 (pp) Q9D6J6" source="8241" target="8176" cy:directed="1"/>
      <edge id="9812" label="Q9DC70 (pp) Q9CZ13" source="8241" target="8218" cy:directed="1"/>
      <edge id="9811" label="Q9DC70 (pp) Q91VT4" source="8241" target="8723" cy:directed="1"/>
      <edge id="9810" label="Q9DC70 (pp) Q91VD9" source="8241" target="8234" cy:directed="1"/>
      <edge id="9809" label="Q9DC70 (pp) P19783" source="8241" target="8214" cy:directed="1"/>
      <edge id="9808" label="Q9DC70 (pp) Q91Z53" source="8241" target="8304" cy:directed="1"/>
      <edge id="9807" label="Q9DC70 (pp) Q91VR2" source="8241" target="8232" cy:directed="1"/>
      <edge id="9806" label="Q9DC70 (pp) Q9DCS9" source="8241" target="8235" cy:directed="1"/>
      <edge id="9805" label="Q9DC70 (pp) Q9D3D9" source="8241" target="8179" cy:directed="1"/>
      <edge id="9804" label="Q9DC70 (pp) O08756" source="8241" target="8352" cy:directed="1"/>
      <edge id="9803" label="Q9DC70 (pp) O09111" source="8241" target="8180" cy:directed="1"/>
      <edge id="9802" label="Q9DC70 (pp) Q9CQ69" source="8241" target="8203" cy:directed="1"/>
      <edge id="9801" label="Q9DC70 (pp) Q8K3J1" source="8241" target="8373" cy:directed="1"/>
      <edge id="9800" label="Q9DC70 (pp) Q9CQJ8" source="8241" target="8239" cy:directed="1"/>
      <edge id="9799" label="Q9DC70 (pp) Q9ERS2" source="8241" target="8308" cy:directed="1"/>
      <edge id="9798" label="Q9DC70 (pp) P70404" source="8241" target="8263" cy:directed="1"/>
      <edge id="9797" label="Q9DC70 (pp) P56480" source="8241" target="8227" cy:directed="1"/>
      <edge id="9796" label="Q9DC70 (pp) Q9CPP6" source="8241" target="8250" cy:directed="1"/>
      <edge id="9795" label="Q9DC70 (pp) Q91YT0" source="8241" target="8348" cy:directed="1"/>
      <edge id="9794" label="Q9DC70 (pp) Q9CR68" source="8241" target="8236" cy:directed="1"/>
      <edge id="9793" label="Q9DC70 (pp) Q3UIU2" source="8241" target="8257" cy:directed="1"/>
      <edge id="9792" label="Q9DC70 (pp) Q9DB20" source="8241" target="8208" cy:directed="1"/>
      <edge id="9791" label="Q9DC70 (pp) Q9D855" source="8241" target="8372" cy:directed="1"/>
      <edge id="9790" label="Q9DC70 (pp) Q9DCX2" source="8241" target="8335" cy:directed="1"/>
      <edge id="9789" label="Q9DC70 (pp) Q9DCJ5" source="8241" target="8349" cy:directed="1"/>
      <edge id="9788" label="Q9DC70 (pp) Q9D0M3" source="8241" target="8219" cy:directed="1"/>
      <edge id="9787" label="Q9DC70 (pp) P17751" source="8241" target="8266" cy:directed="1"/>
      <edge id="9786" label="Q9DC70 (pp) Q99KI0" source="8241" target="8307" cy:directed="1"/>
      <edge id="9785" label="Q9DC70 (pp) Q99LC3" source="8241" target="8220" cy:directed="1"/>
      <edge id="9784" label="Q9DC70 (pp) P97450" source="8241" target="8399" cy:directed="1"/>
      <edge id="9783" label="Q9DC70 (pp) P52503" source="8241" target="8321" cy:directed="1"/>
      <edge id="9782" label="Q9DC70 (pp) P56391" source="8241" target="8300" cy:directed="1"/>
      <edge id="9781" label="Q9DC70 (pp) Q9CQH3" source="8241" target="8209" cy:directed="1"/>
      <edge id="9780" label="Q9DC70 (pp) P42125" source="8241" target="8488" cy:directed="1"/>
      <edge id="9779" label="Q9DC70 (pp) Q9Z1P6" source="8241" target="8268" cy:directed="1"/>
      <edge id="9778" label="Q9DC70 (pp) P62073" source="8241" target="8324" cy:directed="1"/>
      <edge id="9777" label="Q9DC70 (pp) Q8K2B3" source="8241" target="8316" cy:directed="1"/>
      <edge id="9776" label="Q9DC70 (pp) Q9CQZ5" source="8241" target="8175" cy:directed="1"/>
      <edge id="9775" label="Q9DC70 (pp) Q03265" source="8241" target="8181" cy:directed="1"/>
      <edge id="9774" label="Q9DC70 (pp) Q9D0S9" source="8241" target="8242" cy:directed="1"/>
      <edge id="9773" label="Q06185 (pp) P03930" source="8240" target="8357" cy:directed="1"/>
      <edge id="9772" label="Q06185 (pp) Q9DCX2" source="8240" target="8335" cy:directed="1"/>
      <edge id="9771" label="Q06185 (pp) Q9CQQ7" source="8240" target="8378" cy:directed="1"/>
      <edge id="9770" label="Q06185 (pp) Q9ERS2" source="8240" target="8308" cy:directed="1"/>
      <edge id="9769" label="Q06185 (pp) Q9D3D9" source="8240" target="8179" cy:directed="1"/>
      <edge id="9768" label="Q06185 (pp) Q91VR2" source="8240" target="8232" cy:directed="1"/>
      <edge id="9767" label="Q06185 (pp) Q8K3J1" source="8240" target="8373" cy:directed="1"/>
      <edge id="9766" label="Q06185 (pp) O09111" source="8240" target="8180" cy:directed="1"/>
      <edge id="9765" label="Q06185 (pp) Q9CQ69" source="8240" target="8203" cy:directed="1"/>
      <edge id="9764" label="Q06185 (pp) Q9DCJ5" source="8240" target="8349" cy:directed="1"/>
      <edge id="9763" label="Q06185 (pp) P56391" source="8240" target="8300" cy:directed="1"/>
      <edge id="9762" label="Q06185 (pp) Q9CQH3" source="8240" target="8209" cy:directed="1"/>
      <edge id="9761" label="Q06185 (pp) Q9D6J6" source="8240" target="8176" cy:directed="1"/>
      <edge id="9760" label="Q06185 (pp) Q99LY9" source="8240" target="8221" cy:directed="1"/>
      <edge id="9759" label="Q9CQJ8 (pp) Q9CQQ7" source="8239" target="8378" cy:directed="1"/>
      <edge id="9758" label="Q9CQJ8 (pp) Q9DCS9" source="8239" target="8235" cy:directed="1"/>
      <edge id="9757" label="Q9CQJ8 (pp) P62073" source="8239" target="8324" cy:directed="1"/>
      <edge id="9756" label="Q9CQJ8 (pp) P99029" source="8239" target="8325" cy:directed="1"/>
      <edge id="9755" label="Q9CQJ8 (pp) Q9D3D9" source="8239" target="8179" cy:directed="1"/>
      <edge id="9754" label="Q9CQJ8 (pp) Q91VD9" source="8239" target="8234" cy:directed="1"/>
      <edge id="9753" label="Q9CQJ8 (pp) Q9D6J5" source="8239" target="8456" cy:directed="1"/>
      <edge id="9752" label="Q9CQJ8 (pp) Q91VR2" source="8239" target="8232" cy:directed="1"/>
      <edge id="9751" label="Q9CQJ8 (pp) Q9DCX2" source="8239" target="8335" cy:directed="1"/>
      <edge id="9750" label="Q9CQJ8 (pp) Q8K3J1" source="8239" target="8373" cy:directed="1"/>
      <edge id="9749" label="Q9CQJ8 (pp) Q99LY9" source="8239" target="8221" cy:directed="1"/>
      <edge id="9748" label="Q9CQJ8 (pp) Q9CQH3" source="8239" target="8209" cy:directed="1"/>
      <edge id="9747" label="Q9CQJ8 (pp) Q9CR68" source="8239" target="8236" cy:directed="1"/>
      <edge id="9746" label="Q9CQJ8 (pp) Q62425" source="8239" target="8514" cy:directed="1"/>
      <edge id="9745" label="Q9CQJ8 (pp) Q03265" source="8239" target="8181" cy:directed="1"/>
      <edge id="9744" label="Q9CQJ8 (pp) Q8VEM8" source="8239" target="8318" cy:directed="1"/>
      <edge id="9743" label="Q9CQJ8 (pp) Q99LC5" source="8239" target="8284" cy:directed="1"/>
      <edge id="9742" label="Q9CQJ8 (pp) Q9CQZ5" source="8239" target="8175" cy:directed="1"/>
      <edge id="9741" label="Q9CQJ8 (pp) Q8K1Z0" source="8239" target="8288" cy:directed="1"/>
      <edge id="9740" label="Q9CQJ8 (pp) Q9CQC7" source="8239" target="8463" cy:directed="1"/>
      <edge id="9739" label="Q9CQJ8 (pp) P43024" source="8239" target="8441" cy:directed="1"/>
      <edge id="9738" label="Q9CQJ8 (pp) Q9CPQ8" source="8239" target="8233" cy:directed="1"/>
      <edge id="9737" label="Q9CQJ8 (pp) Q9CPP6" source="8239" target="8250" cy:directed="1"/>
      <edge id="9736" label="Q9CQJ8 (pp) Q99LC3" source="8239" target="8220" cy:directed="1"/>
      <edge id="9735" label="Q9CQJ8 (pp) Q91YT0" source="8239" target="8348" cy:directed="1"/>
      <edge id="9734" label="Q9CQJ8 (pp) Q99KI0" source="8239" target="8307" cy:directed="1"/>
      <edge id="9733" label="Q9CQJ8 (pp) Q9ERS2" source="8239" target="8308" cy:directed="1"/>
      <edge id="9732" label="Q9CQJ8 (pp) Q9CQZ6" source="8239" target="8200" cy:directed="1"/>
      <edge id="9731" label="Q9CQJ8 (pp) Q9D023" source="8239" target="8385" cy:directed="1"/>
      <edge id="9730" label="Q9CQJ8 (pp) P97807" source="8239" target="8309" cy:directed="1"/>
      <edge id="9729" label="Q9CQJ8 (pp) Q9CZ13" source="8239" target="8218" cy:directed="1"/>
      <edge id="9728" label="Q9CQJ8 (pp) P97450" source="8239" target="8399" cy:directed="1"/>
      <edge id="9727" label="Q9CQJ8 (pp) Q9CQ54" source="8239" target="8201" cy:directed="1"/>
      <edge id="9726" label="Q9CQJ8 (pp) Q9D6J6" source="8239" target="8176" cy:directed="1"/>
      <edge id="9725" label="Q9CQJ8 (pp) Q9D0M3" source="8239" target="8219" cy:directed="1"/>
      <edge id="9724" label="Q9CQJ8 (pp) P48771" source="8239" target="8272" cy:directed="1"/>
      <edge id="9723" label="Q9CQJ8 (pp) Q9DCJ5" source="8239" target="8349" cy:directed="1"/>
      <edge id="9722" label="Q9CQJ8 (pp) Q9CQ69" source="8239" target="8203" cy:directed="1"/>
      <edge id="9721" label="Q9CQJ8 (pp) Q9DB20" source="8239" target="8208" cy:directed="1"/>
      <edge id="9720" label="Q9CQJ8 (pp) O09111" source="8239" target="8180" cy:directed="1"/>
      <edge id="9719" label="Q9CQJ8 (pp) Q9DC69" source="8239" target="8376" cy:directed="1"/>
      <edge id="9718" label="Q9CQJ8 (pp) Q9Z1P6" source="8239" target="8268" cy:directed="1"/>
      <edge id="9717" label="Q9CQJ8 (pp) Q9DB77" source="8239" target="8374" cy:directed="1"/>
      <edge id="9716" label="Q9CQJ8 (pp) P19783" source="8239" target="8214" cy:directed="1"/>
      <edge id="9715" label="Q9CQJ8 (pp) Q06185" source="8239" target="8240" cy:directed="1"/>
      <edge id="9714" label="P05132 (pp) P35438" source="8238" target="8184" cy:directed="1"/>
      <edge id="9713" label="P05132 (pp) P31324" source="8238" target="8468" cy:directed="1"/>
      <edge id="9712" label="P05132 (pp) P12367" source="8238" target="8386" cy:directed="1"/>
      <edge id="9711" label="Q9CR68 (pp) O35658" source="8236" target="8333" cy:directed="1"/>
      <edge id="9710" label="Q9CR68 (pp) Q9CQH3" source="8236" target="8209" cy:directed="1"/>
      <edge id="9709" label="Q9CR68 (pp) Q91VR2" source="8236" target="8232" cy:directed="1"/>
      <edge id="9708" label="Q9CR68 (pp) Q8VEM8" source="8236" target="8318" cy:directed="1"/>
      <edge id="9707" label="Q9CR68 (pp) Q9DCX2" source="8236" target="8335" cy:directed="1"/>
      <edge id="9706" label="Q9CR68 (pp) O09111" source="8236" target="8180" cy:directed="1"/>
      <edge id="9705" label="Q9CR68 (pp) Q9DC69" source="8236" target="8376" cy:directed="1"/>
      <edge id="9704" label="Q9CR68 (pp) Q9D6J6" source="8236" target="8176" cy:directed="1"/>
      <edge id="9703" label="Q9CR68 (pp) P62897" source="8236" target="8255" cy:directed="1"/>
      <edge id="9702" label="Q9CR68 (pp) O88441" source="8236" target="8264" cy:directed="1"/>
      <edge id="9701" label="Q9CR68 (pp) Q9CQ69" source="8236" target="8203" cy:directed="1"/>
      <edge id="9700" label="Q9CR68 (pp) P56391" source="8236" target="8300" cy:directed="1"/>
      <edge id="9699" label="Q9CR68 (pp) P00405" source="8236" target="8638" cy:directed="1"/>
      <edge id="9698" label="Q9CR68 (pp) Q9D3D9" source="8236" target="8179" cy:directed="1"/>
      <edge id="9697" label="Q9CR68 (pp) Q9ERS2" source="8236" target="8308" cy:directed="1"/>
      <edge id="9696" label="Q9CR68 (pp) Q9WUM5" source="8236" target="8245" cy:directed="1"/>
      <edge id="9695" label="Q9CR68 (pp) Q9DCJ5" source="8236" target="8349" cy:directed="1"/>
      <edge id="9694" label="Q9CR68 (pp) Q8K3J1" source="8236" target="8373" cy:directed="1"/>
      <edge id="9693" label="Q9CR68 (pp) Q9CQQ7" source="8236" target="8378" cy:directed="1"/>
      <edge id="9692" label="Q9CR68 (pp) Q06185" source="8236" target="8240" cy:directed="1"/>
      <edge id="9691" label="Q9CR68 (pp) Q9D2G2" source="8236" target="8256" cy:directed="1"/>
      <edge id="9690" label="Q9CR68 (pp) P43024" source="8236" target="8441" cy:directed="1"/>
      <edge id="9689" label="Q9DCS9 (pp) O09111" source="8235" target="8180" cy:directed="1"/>
      <edge id="9688" label="Q9DCS9 (pp) Q9CQH3" source="8235" target="8209" cy:directed="1"/>
      <edge id="9687" label="Q9DCS9 (pp) Q9DCJ5" source="8235" target="8349" cy:directed="1"/>
      <edge id="9686" label="Q9DCS9 (pp) Q8K3J1" source="8235" target="8373" cy:directed="1"/>
      <edge id="9685" label="Q9DCS9 (pp) Q9CQ69" source="8235" target="8203" cy:directed="1"/>
      <edge id="9684" label="Q9DCS9 (pp) Q9ERS2" source="8235" target="8308" cy:directed="1"/>
      <edge id="9683" label="Q9DCS9 (pp) Q9D6J6" source="8235" target="8176" cy:directed="1"/>
      <edge id="9682" label="Q9DCS9 (pp) Q9DCX2" source="8235" target="8335" cy:directed="1"/>
      <edge id="9681" label="Q9DCS9 (pp) Q9D3D9" source="8235" target="8179" cy:directed="1"/>
      <edge id="9680" label="Q9DCS9 (pp) Q9CPQ8" source="8235" target="8233" cy:directed="1"/>
      <edge id="9679" label="Q9DCS9 (pp) Q06185" source="8235" target="8240" cy:directed="1"/>
      <edge id="9678" label="Q9DCS9 (pp) Q9CQQ7" source="8235" target="8378" cy:directed="1"/>
      <edge id="9677" label="Q9DCS9 (pp) Q9DC69" source="8235" target="8376" cy:directed="1"/>
      <edge id="9676" label="Q9DCS9 (pp) Q9CR68" source="8235" target="8236" cy:directed="1"/>
      <edge id="9675" label="Q91VD9 (pp) Q9D6J6" source="8234" target="8176" cy:directed="1"/>
      <edge id="9674" label="Q91VD9 (pp) Q9CQZ6" source="8234" target="8200" cy:directed="1"/>
      <edge id="9673" label="Q91VD9 (pp) Q9D2G2" source="8234" target="8256" cy:directed="1"/>
      <edge id="9672" label="Q91VD9 (pp) O09111" source="8234" target="8180" cy:directed="1"/>
      <edge id="9671" label="Q91VD9 (pp) Q9CQ69" source="8234" target="8203" cy:directed="1"/>
      <edge id="9670" label="Q91VD9 (pp) Q91VR2" source="8234" target="8232" cy:directed="1"/>
      <edge id="9669" label="Q91VD9 (pp) Q9CQH3" source="8234" target="8209" cy:directed="1"/>
      <edge id="9668" label="Q91VD9 (pp) Q9CR68" source="8234" target="8236" cy:directed="1"/>
      <edge id="9667" label="Q91VD9 (pp) Q9WUM5" source="8234" target="8245" cy:directed="1"/>
      <edge id="9666" label="Q91VD9 (pp) Q9DCS9" source="8234" target="8235" cy:directed="1"/>
      <edge id="9665" label="Q91VD9 (pp) Q6PB66" source="8234" target="8467" cy:directed="1"/>
      <edge id="9664" label="Q91VD9 (pp) Q99LC3" source="8234" target="8220" cy:directed="1"/>
      <edge id="9663" label="Q91VD9 (pp) Q9DB77" source="8234" target="8374" cy:directed="1"/>
      <edge id="9662" label="Q91VD9 (pp) P97807" source="8234" target="8309" cy:directed="1"/>
      <edge id="9661" label="Q91VD9 (pp) Q9CQQ7" source="8234" target="8378" cy:directed="1"/>
      <edge id="9660" label="Q91VD9 (pp) Q9CQ54" source="8234" target="8201" cy:directed="1"/>
      <edge id="9659" label="Q91VD9 (pp) Q9DCJ5" source="8234" target="8349" cy:directed="1"/>
      <edge id="9658" label="Q91VD9 (pp) Q8BMF4" source="8234" target="8222" cy:directed="1"/>
      <edge id="9657" label="Q91VD9 (pp) Q9Z1P6" source="8234" target="8268" cy:directed="1"/>
      <edge id="9656" label="Q91VD9 (pp) Q8K3J1" source="8234" target="8373" cy:directed="1"/>
      <edge id="9655" label="Q91VD9 (pp) Q99LC5" source="8234" target="8284" cy:directed="1"/>
      <edge id="9654" label="Q91VD9 (pp) Q3UIU2" source="8234" target="8257" cy:directed="1"/>
      <edge id="9653" label="Q91VD9 (pp) Q99LY9" source="8234" target="8221" cy:directed="1"/>
      <edge id="9652" label="Q91VD9 (pp) Q91YT0" source="8234" target="8348" cy:directed="1"/>
      <edge id="9651" label="Q91VD9 (pp) Q9DC69" source="8234" target="8376" cy:directed="1"/>
      <edge id="9650" label="Q91VD9 (pp) Q9ERS2" source="8234" target="8308" cy:directed="1"/>
      <edge id="9649" label="Q9CPQ8 (pp) Q9D6J6" source="8233" target="8176" cy:directed="1"/>
      <edge id="9648" label="Q9CPQ8 (pp) Q9CQH3" source="8233" target="8209" cy:directed="1"/>
      <edge id="9647" label="Q91VR2 (pp) Q9D6J6" source="8232" target="8176" cy:directed="1"/>
      <edge id="9646" label="Q91VR2 (pp) Q9CQH3" source="8232" target="8209" cy:directed="1"/>
      <edge id="9645" label="Q91VR2 (pp) O09111" source="8232" target="8180" cy:directed="1"/>
      <edge id="9644" label="Q9JLJ2 (pp) P61922" source="8231" target="8293" cy:directed="1"/>
      <edge id="9643" label="Q9JLJ2 (pp) Q8BW75" source="8231" target="8642" cy:directed="1"/>
      <edge id="9642" label="Q9JLJ2 (pp) Q8CHT0" source="8231" target="8471" cy:directed="1"/>
      <edge id="9641" label="Q9JLJ2 (pp) Q61425" source="8231" target="8283" cy:directed="1"/>
      <edge id="9640" label="Q9JLJ2 (pp) Q9EQ20" source="8231" target="8331" cy:directed="1"/>
      <edge id="9639" label="Q9JLJ2 (pp) Q91VR2" source="8231" target="8232" cy:directed="1"/>
      <edge id="9638" label="P67778 (pp) P50516" source="8230" target="8262" cy:directed="1"/>
      <edge id="9637" label="P68404 (pp) P26645" source="8229" target="8674" cy:directed="1"/>
      <edge id="9636" label="P68404 (pp) P35438" source="8229" target="8184" cy:directed="1"/>
      <edge id="9635" label="P56480 (pp) Q03265" source="8227" target="8181" cy:directed="1"/>
      <edge id="9634" label="P56480 (pp) P97807" source="8227" target="8309" cy:directed="1"/>
      <edge id="9633" label="P56480 (pp) Q9CR68" source="8227" target="8236" cy:directed="1"/>
      <edge id="9632" label="P56480 (pp) Q91YT0" source="8227" target="8348" cy:directed="1"/>
      <edge id="9631" label="P56480 (pp) Q9CQQ7" source="8227" target="8378" cy:directed="1"/>
      <edge id="9630" label="P56480 (pp) Q9D6J6" source="8227" target="8176" cy:directed="1"/>
      <edge id="9629" label="P56480 (pp) Q91VD9" source="8227" target="8234" cy:directed="1"/>
      <edge id="9628" label="P56480 (pp) P16054" source="8227" target="8412" cy:directed="1"/>
      <edge id="9627" label="P56480 (pp) Q91VR2" source="8227" target="8232" cy:directed="1"/>
      <edge id="9626" label="P56480 (pp) Q8VEM8" source="8227" target="8318" cy:directed="1"/>
      <edge id="9625" label="P56480 (pp) Q9DCX2" source="8227" target="8335" cy:directed="1"/>
      <edge id="9624" label="P56480 (pp) P17182" source="8227" target="8484" cy:directed="1"/>
      <edge id="9623" label="P56480 (pp) Q8K3J1" source="8227" target="8373" cy:directed="1"/>
      <edge id="9622" label="P56480 (pp) Q99LC3" source="8227" target="8220" cy:directed="1"/>
      <edge id="9621" label="P56480 (pp) O35143" source="8227" target="8672" cy:directed="1"/>
      <edge id="9620" label="P56480 (pp) P15105" source="8227" target="8251" cy:directed="1"/>
      <edge id="9619" label="P56480 (pp) P56391" source="8227" target="8300" cy:directed="1"/>
      <edge id="9618" label="P56480 (pp) P00405" source="8227" target="8638" cy:directed="1"/>
      <edge id="9617" label="P56480 (pp) P62259" source="8227" target="8194" cy:directed="1"/>
      <edge id="9616" label="P56480 (pp) P19783" source="8227" target="8214" cy:directed="1"/>
      <edge id="9615" label="P56480 (pp) Q9CZ13" source="8227" target="8218" cy:directed="1"/>
      <edge id="9614" label="P56480 (pp) P17156" source="8227" target="8547" cy:directed="1"/>
      <edge id="9613" label="P56480 (pp) Q9WUM5" source="8227" target="8245" cy:directed="1"/>
      <edge id="9612" label="P56480 (pp) Q99LX0" source="8227" target="8286" cy:directed="1"/>
      <edge id="9611" label="P56480 (pp) Q06185" source="8227" target="8240" cy:directed="1"/>
      <edge id="9610" label="P56480 (pp) P03930" source="8227" target="8357" cy:directed="1"/>
      <edge id="9609" label="P56480 (pp) Q60864" source="8227" target="8343" cy:directed="1"/>
      <edge id="9608" label="P56480 (pp) Q9D3D9" source="8227" target="8179" cy:directed="1"/>
      <edge id="9607" label="P56480 (pp) P09103" source="8227" target="8443" cy:directed="1"/>
      <edge id="9606" label="P56480 (pp) P50516" source="8227" target="8262" cy:directed="1"/>
      <edge id="9605" label="P56480 (pp) P63038" source="8227" target="8216" cy:directed="1"/>
      <edge id="9604" label="P56480 (pp) Q9D2G2" source="8227" target="8256" cy:directed="1"/>
      <edge id="9603" label="P56480 (pp) P17742" source="8227" target="8228" cy:directed="1"/>
      <edge id="9602" label="Q61598 (pp) P62821" source="8226" target="8617" cy:directed="1"/>
      <edge id="9601" label="Q61598 (pp) Q99PT1" source="8226" target="8402" cy:directed="1"/>
      <edge id="9600" label="Q61598 (pp) P63011" source="8226" target="8516" cy:directed="1"/>
      <edge id="9599" label="Q61598 (pp) Q91VR2" source="8226" target="8232" cy:directed="1"/>
      <edge id="9598" label="P61027 (pp) Q61598" source="8225" target="8226" cy:directed="1"/>
      <edge id="9597" label="P63085 (pp) P07901" source="8224" target="8477" cy:directed="1"/>
      <edge id="9596" label="P63085 (pp) Q64010" source="8224" target="8398" cy:directed="1"/>
      <edge id="9595" label="P63085 (pp) P35438" source="8224" target="8184" cy:directed="1"/>
      <edge id="9594" label="Q05920 (pp) P15105" source="8223" target="8251" cy:directed="1"/>
      <edge id="9593" label="Q05920 (pp) P06151" source="8223" target="8207" cy:directed="1"/>
      <edge id="9592" label="Q8BMF4 (pp) Q922H2" source="8222" target="8660" cy:directed="1"/>
      <edge id="9591" label="Q8BMF4 (pp) Q99JY0" source="8222" target="8353" cy:directed="1"/>
      <edge id="9590" label="Q8BMF4 (pp) Q9WUM5" source="8222" target="8245" cy:directed="1"/>
      <edge id="9589" label="Q8BMF4 (pp) P63101" source="8222" target="8448" cy:directed="1"/>
      <edge id="9588" label="Q8BMF4 (pp) Q9D2G2" source="8222" target="8256" cy:directed="1"/>
      <edge id="9587" label="Q8BMF4 (pp) Q8BWT1" source="8222" target="8280" cy:directed="1"/>
      <edge id="9586" label="Q8BMF4 (pp) Q05920" source="8222" target="8223" cy:directed="1"/>
      <edge id="9585" label="Q99LY9 (pp) Q9D6J6" source="8221" target="8176" cy:directed="1"/>
      <edge id="9584" label="Q99LY9 (pp) Q9CQH3" source="8221" target="8209" cy:directed="1"/>
      <edge id="9583" label="Q99LY9 (pp) Q9ERS2" source="8221" target="8308" cy:directed="1"/>
      <edge id="9582" label="Q99LC3 (pp) Q8K3J1" source="8220" target="8373" cy:directed="1"/>
      <edge id="9581" label="Q99LC3 (pp) Q9D3D9" source="8220" target="8179" cy:directed="1"/>
      <edge id="9580" label="Q99LC3 (pp) Q9DC69" source="8220" target="8376" cy:directed="1"/>
      <edge id="9579" label="Q99LC3 (pp) Q9CQ69" source="8220" target="8203" cy:directed="1"/>
      <edge id="9578" label="Q99LC3 (pp) Q9DCS9" source="8220" target="8235" cy:directed="1"/>
      <edge id="9577" label="Q99LC3 (pp) Q9CQ54" source="8220" target="8201" cy:directed="1"/>
      <edge id="9576" label="Q99LC3 (pp) Q91YT0" source="8220" target="8348" cy:directed="1"/>
      <edge id="9575" label="Q99LC3 (pp) Q9DB77" source="8220" target="8374" cy:directed="1"/>
      <edge id="9574" label="Q99LC3 (pp) Q9CQH3" source="8220" target="8209" cy:directed="1"/>
      <edge id="9573" label="Q99LC3 (pp) Q9D6J6" source="8220" target="8176" cy:directed="1"/>
      <edge id="9572" label="Q99LC3 (pp) O09111" source="8220" target="8180" cy:directed="1"/>
      <edge id="9571" label="Q99LC3 (pp) P50516" source="8220" target="8262" cy:directed="1"/>
      <edge id="9570" label="Q99LC3 (pp) Q9DCJ5" source="8220" target="8349" cy:directed="1"/>
      <edge id="9569" label="Q99LC3 (pp) Q9Z1P6" source="8220" target="8268" cy:directed="1"/>
      <edge id="9568" label="Q99LC3 (pp) Q99LY9" source="8220" target="8221" cy:directed="1"/>
      <edge id="9567" label="Q9D0M3 (pp) P56480" source="8219" target="8227" cy:directed="1"/>
      <edge id="9566" label="Q9D0M3 (pp) O35658" source="8219" target="8333" cy:directed="1"/>
      <edge id="9565" label="Q9D0M3 (pp) Q03265" source="8219" target="8181" cy:directed="1"/>
      <edge id="9564" label="Q9D0M3 (pp) Q9CPP6" source="8219" target="8250" cy:directed="1"/>
      <edge id="9563" label="Q9D0M3 (pp) P19783" source="8219" target="8214" cy:directed="1"/>
      <edge id="9562" label="Q9D0M3 (pp) P00405" source="8219" target="8638" cy:directed="1"/>
      <edge id="9561" label="Q9D0M3 (pp) Q9Z1P6" source="8219" target="8268" cy:directed="1"/>
      <edge id="9560" label="Q9D0M3 (pp) Q9CQH3" source="8219" target="8209" cy:directed="1"/>
      <edge id="9559" label="Q9D0M3 (pp) Q9CZ13" source="8219" target="8218" cy:directed="1"/>
      <edge id="9558" label="Q9D0M3 (pp) P48771" source="8219" target="8272" cy:directed="1"/>
      <edge id="9557" label="Q9D0M3 (pp) Q9DCJ5" source="8219" target="8349" cy:directed="1"/>
      <edge id="9556" label="Q9D0M3 (pp) Q9D2G2" source="8219" target="8256" cy:directed="1"/>
      <edge id="9555" label="Q9D0M3 (pp) Q9CQQ7" source="8219" target="8378" cy:directed="1"/>
      <edge id="9554" label="Q9D0M3 (pp) Q9DC69" source="8219" target="8376" cy:directed="1"/>
      <edge id="9553" label="Q9D0M3 (pp) P43024" source="8219" target="8441" cy:directed="1"/>
      <edge id="9552" label="Q9D0M3 (pp) Q99LX0" source="8219" target="8286" cy:directed="1"/>
      <edge id="9551" label="Q9D0M3 (pp) Q99LC3" source="8219" target="8220" cy:directed="1"/>
      <edge id="9550" label="Q9D0M3 (pp) P42125" source="8219" target="8488" cy:directed="1"/>
      <edge id="9549" label="Q9D0M3 (pp) Q8VEM8" source="8219" target="8318" cy:directed="1"/>
      <edge id="9548" label="Q9D0M3 (pp) P56391" source="8219" target="8300" cy:directed="1"/>
      <edge id="9547" label="Q9D0M3 (pp) Q64521" source="8219" target="8394" cy:directed="1"/>
      <edge id="9546" label="Q9D0M3 (pp) Q8K3J1" source="8219" target="8373" cy:directed="1"/>
      <edge id="9545" label="Q9D0M3 (pp) P62073" source="8219" target="8324" cy:directed="1"/>
      <edge id="9544" label="Q9D0M3 (pp) Q9D6J6" source="8219" target="8176" cy:directed="1"/>
      <edge id="9543" label="Q9D0M3 (pp) Q91YT0" source="8219" target="8348" cy:directed="1"/>
      <edge id="9542" label="Q9D0M3 (pp) Q9CR68" source="8219" target="8236" cy:directed="1"/>
      <edge id="9541" label="Q9D0M3 (pp) Q9DCX2" source="8219" target="8335" cy:directed="1"/>
      <edge id="9540" label="Q9D0M3 (pp) P50516" source="8219" target="8262" cy:directed="1"/>
      <edge id="9539" label="Q9D0M3 (pp) Q91VR2" source="8219" target="8232" cy:directed="1"/>
      <edge id="9538" label="Q9D0M3 (pp) P19536" source="8219" target="8342" cy:directed="1"/>
      <edge id="9537" label="Q9D0M3 (pp) Q9DB77" source="8219" target="8374" cy:directed="1"/>
      <edge id="9536" label="Q9D0M3 (pp) P17751" source="8219" target="8266" cy:directed="1"/>
      <edge id="9535" label="Q9D0M3 (pp) Q91VD9" source="8219" target="8234" cy:directed="1"/>
      <edge id="9534" label="Q9D0M3 (pp) Q9WUM5" source="8219" target="8245" cy:directed="1"/>
      <edge id="9533" label="Q9D0M3 (pp) Q06185" source="8219" target="8240" cy:directed="1"/>
      <edge id="9532" label="Q9D0M3 (pp) P97450" source="8219" target="8399" cy:directed="1"/>
      <edge id="9531" label="Q9D0M3 (pp) Q9CQ69" source="8219" target="8203" cy:directed="1"/>
      <edge id="9530" label="Q9D0M3 (pp) Q9CQZ6" source="8219" target="8200" cy:directed="1"/>
      <edge id="9529" label="Q9D0M3 (pp) Q9ERS2" source="8219" target="8308" cy:directed="1"/>
      <edge id="9528" label="Q9D0M3 (pp) Q9D3D9" source="8219" target="8179" cy:directed="1"/>
      <edge id="9527" label="Q9D0M3 (pp) P97807" source="8219" target="8309" cy:directed="1"/>
      <edge id="9526" label="Q9D0M3 (pp) O09111" source="8219" target="8180" cy:directed="1"/>
      <edge id="9525" label="Q9D0M3 (pp) P70404" source="8219" target="8263" cy:directed="1"/>
      <edge id="9524" label="Q9D0M3 (pp) P62897" source="8219" target="8255" cy:directed="1"/>
      <edge id="9523" label="Q9D0M3 (pp) Q9DB20" source="8219" target="8208" cy:directed="1"/>
      <edge id="9522" label="Q9CZ13 (pp) Q99LY9" source="8218" target="8221" cy:directed="1"/>
      <edge id="9521" label="Q9CZ13 (pp) Q9CR68" source="8218" target="8236" cy:directed="1"/>
      <edge id="9520" label="Q9CZ13 (pp) Q9DB77" source="8218" target="8374" cy:directed="1"/>
      <edge id="9519" label="Q9CZ13 (pp) Q9DC69" source="8218" target="8376" cy:directed="1"/>
      <edge id="9518" label="Q9CZ13 (pp) Q99P72" source="8218" target="8647" cy:directed="1"/>
      <edge id="9517" label="Q9CZ13 (pp) Q9CQH3" source="8218" target="8209" cy:directed="1"/>
      <edge id="9516" label="Q9CZ13 (pp) Q8K3J1" source="8218" target="8373" cy:directed="1"/>
      <edge id="9515" label="Q9CZ13 (pp) Q91VR2" source="8218" target="8232" cy:directed="1"/>
      <edge id="9514" label="Q9CZ13 (pp) Q9D6J6" source="8218" target="8176" cy:directed="1"/>
      <edge id="9513" label="Q9CZ13 (pp) P19783" source="8218" target="8214" cy:directed="1"/>
      <edge id="9512" label="Q9CZ13 (pp) Q9WUM5" source="8218" target="8245" cy:directed="1"/>
      <edge id="9511" label="Q9CZ13 (pp) Q9Z1P6" source="8218" target="8268" cy:directed="1"/>
      <edge id="9510" label="Q9CZ13 (pp) Q9DCJ5" source="8218" target="8349" cy:directed="1"/>
      <edge id="9509" label="Q9CZ13 (pp) Q9CQ69" source="8218" target="8203" cy:directed="1"/>
      <edge id="9508" label="Q9CZ13 (pp) Q60597" source="8218" target="8480" cy:directed="1"/>
      <edge id="9507" label="Q9CZ13 (pp) Q8K1Z0" source="8218" target="8288" cy:directed="1"/>
      <edge id="9506" label="Q9CZ13 (pp) O09111" source="8218" target="8180" cy:directed="1"/>
      <edge id="9505" label="Q9CZ13 (pp) Q91YT0" source="8218" target="8348" cy:directed="1"/>
      <edge id="9504" label="Q9CZ13 (pp) Q9D3D9" source="8218" target="8179" cy:directed="1"/>
      <edge id="9503" label="Q9CZ13 (pp) Q91VD9" source="8218" target="8234" cy:directed="1"/>
      <edge id="9502" label="Q9CZ13 (pp) P67778" source="8218" target="8230" cy:directed="1"/>
      <edge id="9501" label="Q9CZ13 (pp) P97807" source="8218" target="8309" cy:directed="1"/>
      <edge id="9500" label="Q9CZ13 (pp) Q9DCS9" source="8218" target="8235" cy:directed="1"/>
      <edge id="9499" label="Q9CZ13 (pp) Q9ERS2" source="8218" target="8308" cy:directed="1"/>
      <edge id="9498" label="Q8BH95 (pp) Q9DBL1" source="8217" target="8420" cy:directed="1"/>
      <edge id="9497" label="Q8BH95 (pp) Q9DC69" source="8217" target="8376" cy:directed="1"/>
      <edge id="9496" label="Q8BH95 (pp) Q99LC5" source="8217" target="8284" cy:directed="1"/>
      <edge id="9495" label="Q8BH95 (pp) Q9CQ62" source="8217" target="8254" cy:directed="1"/>
      <edge id="9494" label="Q8BH95 (pp) Q9WUM5" source="8217" target="8245" cy:directed="1"/>
      <edge id="9493" label="Q8BH95 (pp) Q9DCJ5" source="8217" target="8349" cy:directed="1"/>
      <edge id="9492" label="Q8BH95 (pp) Q99MR8" source="8217" target="8594" cy:directed="1"/>
      <edge id="9491" label="Q8BH95 (pp) Q99JY0" source="8217" target="8353" cy:directed="1"/>
      <edge id="9490" label="Q8BH95 (pp) Q61425" source="8217" target="8283" cy:directed="1"/>
      <edge id="9489" label="Q8BH95 (pp) O08756" source="8217" target="8352" cy:directed="1"/>
      <edge id="9488" label="Q8BH95 (pp) Q99MN9" source="8217" target="8403" cy:directed="1"/>
      <edge id="9487" label="Q8BH95 (pp) Q8BMS1" source="8217" target="8485" cy:directed="1"/>
      <edge id="9486" label="Q8BH95 (pp) Q9JHI5" source="8217" target="8422" cy:directed="1"/>
      <edge id="9485" label="Q8BH95 (pp) P50544" source="8217" target="8428" cy:directed="1"/>
      <edge id="9484" label="Q8BH95 (pp) P51174" source="8217" target="8361" cy:directed="1"/>
      <edge id="9483" label="Q8BH95 (pp) Q8QZT1" source="8217" target="8526" cy:directed="1"/>
      <edge id="9482" label="Q8BH95 (pp) Q8BWT1" source="8217" target="8280" cy:directed="1"/>
      <edge id="9481" label="Q8BH95 (pp) Q9CZ13" source="8217" target="8218" cy:directed="1"/>
      <edge id="9480" label="P63038 (pp) P97807" source="8216" target="8309" cy:directed="1"/>
      <edge id="9479" label="P63038 (pp) P67778" source="8216" target="8230" cy:directed="1"/>
      <edge id="9478" label="P63038 (pp) O35658" source="8216" target="8333" cy:directed="1"/>
      <edge id="9477" label="P63038 (pp) P17156" source="8216" target="8547" cy:directed="1"/>
      <edge id="9476" label="P63038 (pp) Q61699" source="8216" target="8687" cy:directed="1"/>
      <edge id="9475" label="P63038 (pp) Q91VR2" source="8216" target="8232" cy:directed="1"/>
      <edge id="9474" label="P63038 (pp) Q921G7" source="8216" target="8279" cy:directed="1"/>
      <edge id="9473" label="P63038 (pp) Q8CGK3" source="8216" target="8727" cy:directed="1"/>
      <edge id="9472" label="P63038 (pp) Q925I1" source="8216" target="8558" cy:directed="1"/>
      <edge id="9471" label="P63038 (pp) P63037" source="8216" target="8248" cy:directed="1"/>
      <edge id="9470" label="P63038 (pp) Q8BIJ6" source="8216" target="8696" cy:directed="1"/>
      <edge id="9469" label="P63038 (pp) Q6PB66" source="8216" target="8467" cy:directed="1"/>
      <edge id="9468" label="P63038 (pp) Q9Z0X1" source="8216" target="8519" cy:directed="1"/>
      <edge id="9467" label="P63038 (pp) Q9WUM5" source="8216" target="8245" cy:directed="1"/>
      <edge id="9466" label="P63038 (pp) P15105" source="8216" target="8251" cy:directed="1"/>
      <edge id="9465" label="P63038 (pp) P52480" source="8216" target="8424" cy:directed="1"/>
      <edge id="9464" label="P63038 (pp) Q99LC5" source="8216" target="8284" cy:directed="1"/>
      <edge id="9463" label="P63038 (pp) P09411" source="8216" target="8267" cy:directed="1"/>
      <edge id="9462" label="P63038 (pp) P52196" source="8216" target="8237" cy:directed="1"/>
      <edge id="9461" label="Q8BK64 (pp) P11499" source="8215" target="8289" cy:directed="1"/>
      <edge id="9460" label="Q8BK64 (pp) Q61699" source="8215" target="8687" cy:directed="1"/>
      <edge id="9459" label="Q8BK64 (pp) P07901" source="8215" target="8477" cy:directed="1"/>
      <edge id="9458" label="Q8BK64 (pp) Q60864" source="8215" target="8343" cy:directed="1"/>
      <edge id="9457" label="Q8BK64 (pp) P63038" source="8215" target="8216" cy:directed="1"/>
      <edge id="9456" label="P19783 (pp) Q9DC69" source="8214" target="8376" cy:directed="1"/>
      <edge id="9455" label="P19783 (pp) P48771" source="8214" target="8272" cy:directed="1"/>
      <edge id="9454" label="P19783 (pp) Q9DCJ5" source="8214" target="8349" cy:directed="1"/>
      <edge id="9453" label="P19783 (pp) P00405" source="8214" target="8638" cy:directed="1"/>
      <edge id="9452" label="P19783 (pp) P43024" source="8214" target="8441" cy:directed="1"/>
      <edge id="9451" label="P19783 (pp) P56391" source="8214" target="8300" cy:directed="1"/>
      <edge id="9450" label="P19783 (pp) Q9CQQ7" source="8214" target="8378" cy:directed="1"/>
      <edge id="9449" label="P19783 (pp) Q99LX0" source="8214" target="8286" cy:directed="1"/>
      <edge id="9448" label="P19783 (pp) Q9DCX2" source="8214" target="8335" cy:directed="1"/>
      <edge id="9447" label="P19783 (pp) P17665" source="8214" target="8524" cy:directed="1"/>
      <edge id="9446" label="P19783 (pp) Q9ERS2" source="8214" target="8308" cy:directed="1"/>
      <edge id="9445" label="P19783 (pp) Q91VR2" source="8214" target="8232" cy:directed="1"/>
      <edge id="9444" label="P19783 (pp) Q06185" source="8214" target="8240" cy:directed="1"/>
      <edge id="9443" label="P19783 (pp) Q91YT0" source="8214" target="8348" cy:directed="1"/>
      <edge id="9442" label="P19783 (pp) Q9D3D9" source="8214" target="8179" cy:directed="1"/>
      <edge id="9441" label="P19783 (pp) P19536" source="8214" target="8342" cy:directed="1"/>
      <edge id="9440" label="P19783 (pp) Q9CR68" source="8214" target="8236" cy:directed="1"/>
      <edge id="9439" label="P19783 (pp) Q9CQ69" source="8214" target="8203" cy:directed="1"/>
      <edge id="9438" label="P19783 (pp) Q9CQH3" source="8214" target="8209" cy:directed="1"/>
      <edge id="9437" label="O88952 (pp) O70589" source="8213" target="8533" cy:directed="1"/>
      <edge id="9436" label="O88952 (pp) P60469" source="8213" target="8582" cy:directed="1"/>
      <edge id="9435" label="Q6P9K8 (pp) O70589" source="8212" target="8533" cy:directed="1"/>
      <edge id="9434" label="Q6P9K8 (pp) O88952" source="8212" target="8213" cy:directed="1"/>
      <edge id="9433" label="Q9Z2H5 (pp) Q99N28" source="8211" target="8341" cy:directed="1"/>
      <edge id="9432" label="Q3UHD9 (pp) Q9Z2H5" source="8210" target="8211" cy:directed="1"/>
      <edge id="9431" label="Q9CQH3 (pp) Q9D6J6" source="8209" target="8176" cy:directed="1"/>
      <edge id="9430" label="Q9DB20 (pp) Q9DB77" source="8208" target="8374" cy:directed="1"/>
      <edge id="9429" label="Q9DB20 (pp) Q91VR2" source="8208" target="8232" cy:directed="1"/>
      <edge id="9428" label="Q9DB20 (pp) Q9CPQ8" source="8208" target="8233" cy:directed="1"/>
      <edge id="9427" label="Q9DB20 (pp) Q9Z1P6" source="8208" target="8268" cy:directed="1"/>
      <edge id="9426" label="Q9DB20 (pp) Q03265" source="8208" target="8181" cy:directed="1"/>
      <edge id="9425" label="Q9DB20 (pp) P56480" source="8208" target="8227" cy:directed="1"/>
      <edge id="9424" label="Q9DB20 (pp) P43024" source="8208" target="8441" cy:directed="1"/>
      <edge id="9423" label="Q9DB20 (pp) Q9DCS9" source="8208" target="8235" cy:directed="1"/>
      <edge id="9422" label="Q9DB20 (pp) Q91VM9" source="8208" target="8375" cy:directed="1"/>
      <edge id="9421" label="Q9DB20 (pp) Q06185" source="8208" target="8240" cy:directed="1"/>
      <edge id="9420" label="Q9DB20 (pp) Q8K3J1" source="8208" target="8373" cy:directed="1"/>
      <edge id="9419" label="Q9DB20 (pp) Q78IK2" source="8208" target="8724" cy:directed="1"/>
      <edge id="9418" label="Q9DB20 (pp) P17751" source="8208" target="8266" cy:directed="1"/>
      <edge id="9417" label="Q9DB20 (pp) Q9WUM5" source="8208" target="8245" cy:directed="1"/>
      <edge id="9416" label="Q9DB20 (pp) Q91YT0" source="8208" target="8348" cy:directed="1"/>
      <edge id="9415" label="Q9DB20 (pp) Q9D3D9" source="8208" target="8179" cy:directed="1"/>
      <edge id="9414" label="Q9DB20 (pp) Q9ERS2" source="8208" target="8308" cy:directed="1"/>
      <edge id="9413" label="Q9DB20 (pp) P62073" source="8208" target="8324" cy:directed="1"/>
      <edge id="9412" label="Q9DB20 (pp) Q9CQQ7" source="8208" target="8378" cy:directed="1"/>
      <edge id="9411" label="Q9DB20 (pp) Q9DC69" source="8208" target="8376" cy:directed="1"/>
      <edge id="9410" label="Q9DB20 (pp) Q3UIU2" source="8208" target="8257" cy:directed="1"/>
      <edge id="9409" label="Q9DB20 (pp) P56391" source="8208" target="8300" cy:directed="1"/>
      <edge id="9408" label="Q9DB20 (pp) P19783" source="8208" target="8214" cy:directed="1"/>
      <edge id="9407" label="Q9DB20 (pp) Q9D6J6" source="8208" target="8176" cy:directed="1"/>
      <edge id="9406" label="Q9DB20 (pp) Q9CZ13" source="8208" target="8218" cy:directed="1"/>
      <edge id="9405" label="Q9DB20 (pp) P97807" source="8208" target="8309" cy:directed="1"/>
      <edge id="9404" label="Q9DB20 (pp) Q9CR68" source="8208" target="8236" cy:directed="1"/>
      <edge id="9403" label="Q9DB20 (pp) Q9CQ69" source="8208" target="8203" cy:directed="1"/>
      <edge id="9402" label="Q9DB20 (pp) P99029" source="8208" target="8325" cy:directed="1"/>
      <edge id="9401" label="Q9DB20 (pp) Q9CPP6" source="8208" target="8250" cy:directed="1"/>
      <edge id="9400" label="Q9DB20 (pp) Q9DCJ5" source="8208" target="8349" cy:directed="1"/>
      <edge id="9399" label="Q9DB20 (pp) Q99LX0" source="8208" target="8286" cy:directed="1"/>
      <edge id="9398" label="Q9DB20 (pp) Q9D6J5" source="8208" target="8456" cy:directed="1"/>
      <edge id="9397" label="Q9DB20 (pp) O09111" source="8208" target="8180" cy:directed="1"/>
      <edge id="9396" label="Q9DB20 (pp) Q9DCX2" source="8208" target="8335" cy:directed="1"/>
      <edge id="9395" label="Q9DB20 (pp) P67778" source="8208" target="8230" cy:directed="1"/>
      <edge id="9394" label="Q9DB20 (pp) Q9CQH3" source="8208" target="8209" cy:directed="1"/>
      <edge id="9393" label="P54071 (pp) P70404" source="8206" target="8263" cy:directed="1"/>
      <edge id="9392" label="P54071 (pp) Q60597" source="8206" target="8480" cy:directed="1"/>
      <edge id="9391" label="P54071 (pp) P06151" source="8206" target="8207" cy:directed="1"/>
      <edge id="9390" label="Q9D6R2 (pp) Q9WUM5" source="8205" target="8245" cy:directed="1"/>
      <edge id="9389" label="Q9D6R2 (pp) Q9D2G2" source="8205" target="8256" cy:directed="1"/>
      <edge id="9388" label="Q9D6R2 (pp) P54071" source="8205" target="8206" cy:directed="1"/>
      <edge id="9387" label="Q9D6R2 (pp) Q60597" source="8205" target="8480" cy:directed="1"/>
      <edge id="9386" label="Q9D6R2 (pp) Q8K3J1" source="8205" target="8373" cy:directed="1"/>
      <edge id="9385" label="Q9D6R2 (pp) Q91VR2" source="8205" target="8232" cy:directed="1"/>
      <edge id="9384" label="Q9D6R2 (pp) Q8BWF0" source="8205" target="8592" cy:directed="1"/>
      <edge id="9383" label="Q9D6R2 (pp) P16054" source="8205" target="8412" cy:directed="1"/>
      <edge id="9382" label="Q9D6R2 (pp) P70404" source="8205" target="8263" cy:directed="1"/>
      <edge id="9381" label="P08249 (pp) Q9DCS9" source="8204" target="8235" cy:directed="1"/>
      <edge id="9380" label="P08249 (pp) Q9CQQ7" source="8204" target="8378" cy:directed="1"/>
      <edge id="9379" label="P08249 (pp) Q9CQH3" source="8204" target="8209" cy:directed="1"/>
      <edge id="9378" label="P08249 (pp) Q03265" source="8204" target="8181" cy:directed="1"/>
      <edge id="9377" label="P08249 (pp) P48962" source="8204" target="8667" cy:directed="1"/>
      <edge id="9376" label="P08249 (pp) P06745" source="8204" target="8433" cy:directed="1"/>
      <edge id="9375" label="P08249 (pp) Q9D0M3" source="8204" target="8219" cy:directed="1"/>
      <edge id="9374" label="P08249 (pp) Q9CZ13" source="8204" target="8218" cy:directed="1"/>
      <edge id="9373" label="P08249 (pp) Q9CQZ5" source="8204" target="8175" cy:directed="1"/>
      <edge id="9372" label="P08249 (pp) P26443" source="8204" target="8303" cy:directed="1"/>
      <edge id="9371" label="P08249 (pp) Q9WUM5" source="8204" target="8245" cy:directed="1"/>
      <edge id="9370" label="P08249 (pp) P97450" source="8204" target="8399" cy:directed="1"/>
      <edge id="9369" label="P08249 (pp) Q9DCJ5" source="8204" target="8349" cy:directed="1"/>
      <edge id="9368" label="P08249 (pp) Q9D2G2" source="8204" target="8256" cy:directed="1"/>
      <edge id="9367" label="P08249 (pp) P52480" source="8204" target="8424" cy:directed="1"/>
      <edge id="9366" label="P08249 (pp) P54071" source="8204" target="8206" cy:directed="1"/>
      <edge id="9365" label="P08249 (pp) Q9DB20" source="8204" target="8208" cy:directed="1"/>
      <edge id="9364" label="P08249 (pp) Q91VD9" source="8204" target="8234" cy:directed="1"/>
      <edge id="9363" label="P08249 (pp) P19783" source="8204" target="8214" cy:directed="1"/>
      <edge id="9362" label="P08249 (pp) Q9Z2I9" source="8204" target="8427" cy:directed="1"/>
      <edge id="9361" label="P08249 (pp) Q91YT0" source="8204" target="8348" cy:directed="1"/>
      <edge id="9360" label="P08249 (pp) Q05920" source="8204" target="8223" cy:directed="1"/>
      <edge id="9359" label="P08249 (pp) Q9DCX2" source="8204" target="8335" cy:directed="1"/>
      <edge id="9358" label="P08249 (pp) Q99LX0" source="8204" target="8286" cy:directed="1"/>
      <edge id="9357" label="P08249 (pp) O09111" source="8204" target="8180" cy:directed="1"/>
      <edge id="9356" label="P08249 (pp) Q99KI0" source="8204" target="8307" cy:directed="1"/>
      <edge id="9355" label="P08249 (pp) Q8VEM8" source="8204" target="8318" cy:directed="1"/>
      <edge id="9354" label="P08249 (pp) Q9CQJ8" source="8204" target="8239" cy:directed="1"/>
      <edge id="9353" label="P08249 (pp) Q8BMF4" source="8204" target="8222" cy:directed="1"/>
      <edge id="9352" label="P08249 (pp) Q8BMF3" source="8204" target="8513" cy:directed="1"/>
      <edge id="9351" label="P08249 (pp) Q8K3J1" source="8204" target="8373" cy:directed="1"/>
      <edge id="9350" label="P08249 (pp) Q9DC69" source="8204" target="8376" cy:directed="1"/>
      <edge id="9349" label="P08249 (pp) P09411" source="8204" target="8267" cy:directed="1"/>
      <edge id="9348" label="P08249 (pp) Q9DB77" source="8204" target="8374" cy:directed="1"/>
      <edge id="9347" label="P08249 (pp) Q9CR68" source="8204" target="8236" cy:directed="1"/>
      <edge id="9346" label="P08249 (pp) Q9CQC7" source="8204" target="8463" cy:directed="1"/>
      <edge id="9345" label="P08249 (pp) Q9D6J6" source="8204" target="8176" cy:directed="1"/>
      <edge id="9344" label="P08249 (pp) P63038" source="8204" target="8216" cy:directed="1"/>
      <edge id="9343" label="P08249 (pp) Q8BH04" source="8204" target="8593" cy:directed="1"/>
      <edge id="9342" label="P08249 (pp) Q9DC70" source="8204" target="8241" cy:directed="1"/>
      <edge id="9341" label="P08249 (pp) P05202" source="8204" target="8185" cy:directed="1"/>
      <edge id="9340" label="P08249 (pp) Q8K2B3" source="8204" target="8316" cy:directed="1"/>
      <edge id="9339" label="P08249 (pp) Q9D855" source="8204" target="8372" cy:directed="1"/>
      <edge id="9338" label="P08249 (pp) Q9D051" source="8204" target="8178" cy:directed="1"/>
      <edge id="9337" label="P08249 (pp) Q8BGH2" source="8204" target="8285" cy:directed="1"/>
      <edge id="9336" label="P08249 (pp) Q60931" source="8204" target="8525" cy:directed="1"/>
      <edge id="9335" label="P08249 (pp) Q64521" source="8204" target="8394" cy:directed="1"/>
      <edge id="9334" label="P08249 (pp) P97807" source="8204" target="8309" cy:directed="1"/>
      <edge id="9333" label="P08249 (pp) Q9D3D9" source="8204" target="8179" cy:directed="1"/>
      <edge id="9332" label="P08249 (pp) P56480" source="8204" target="8227" cy:directed="1"/>
      <edge id="9331" label="P08249 (pp) Q9DCD0" source="8204" target="8191" cy:directed="1"/>
      <edge id="9330" label="P08249 (pp) P17751" source="8204" target="8266" cy:directed="1"/>
      <edge id="9329" label="P08249 (pp) O35658" source="8204" target="8333" cy:directed="1"/>
      <edge id="9328" label="P08249 (pp) P70404" source="8204" target="8263" cy:directed="1"/>
      <edge id="9327" label="P08249 (pp) Q91VR2" source="8204" target="8232" cy:directed="1"/>
      <edge id="9326" label="P08249 (pp) Q06185" source="8204" target="8240" cy:directed="1"/>
      <edge id="9325" label="P08249 (pp) Q9D6R2" source="8204" target="8205" cy:directed="1"/>
      <edge id="9324" label="Q9CQ69 (pp) Q99LX0" source="8203" target="8286" cy:directed="1"/>
      <edge id="9323" label="Q9CQ69 (pp) Q9CQQ7" source="8203" target="8378" cy:directed="1"/>
      <edge id="9322" label="Q9CQ69 (pp) O09111" source="8203" target="8180" cy:directed="1"/>
      <edge id="9321" label="Q9CQ69 (pp) P17665" source="8203" target="8524" cy:directed="1"/>
      <edge id="9320" label="Q9CQ69 (pp) Q3UIU2" source="8203" target="8257" cy:directed="1"/>
      <edge id="9319" label="Q9CQ69 (pp) Q91VR2" source="8203" target="8232" cy:directed="1"/>
      <edge id="9318" label="Q9CQ69 (pp) P00405" source="8203" target="8638" cy:directed="1"/>
      <edge id="9317" label="Q9CQ69 (pp) Q9D3D9" source="8203" target="8179" cy:directed="1"/>
      <edge id="9316" label="Q9CQ69 (pp) Q9ERS2" source="8203" target="8308" cy:directed="1"/>
      <edge id="9315" label="Q9CQ69 (pp) Q9DC69" source="8203" target="8376" cy:directed="1"/>
      <edge id="9314" label="Q9CQ69 (pp) Q9CQH3" source="8203" target="8209" cy:directed="1"/>
      <edge id="9313" label="Q9CQ69 (pp) Q9DCJ5" source="8203" target="8349" cy:directed="1"/>
      <edge id="9312" label="Q9CQ69 (pp) Q9D6J6" source="8203" target="8176" cy:directed="1"/>
      <edge id="9311" label="Q9CQ69 (pp) Q99LY9" source="8203" target="8221" cy:directed="1"/>
      <edge id="9310" label="Q9CQ69 (pp) Q8K3J1" source="8203" target="8373" cy:directed="1"/>
      <edge id="9309" label="Q9CQ69 (pp) P56391" source="8203" target="8300" cy:directed="1"/>
      <edge id="9308" label="Q9DCT2 (pp) P97450" source="8202" target="8399" cy:directed="1"/>
      <edge id="9307" label="Q9DCT2 (pp) Q99LX0" source="8202" target="8286" cy:directed="1"/>
      <edge id="9306" label="Q9DCT2 (pp) Q06185" source="8202" target="8240" cy:directed="1"/>
      <edge id="9305" label="Q9DCT2 (pp) P70404" source="8202" target="8263" cy:directed="1"/>
      <edge id="9304" label="Q9DCT2 (pp) Q9CQZ5" source="8202" target="8175" cy:directed="1"/>
      <edge id="9303" label="Q9DCT2 (pp) Q80Y14" source="8202" target="8571" cy:directed="1"/>
      <edge id="9302" label="Q9DCT2 (pp) Q9CZU6" source="8202" target="8190" cy:directed="1"/>
      <edge id="9301" label="Q9DCT2 (pp) Q9CR62" source="8202" target="8715" cy:directed="1"/>
      <edge id="9300" label="Q9DCT2 (pp) Q9Z1P6" source="8202" target="8268" cy:directed="1"/>
      <edge id="9299" label="Q9DCT2 (pp) P97807" source="8202" target="8309" cy:directed="1"/>
      <edge id="9298" label="Q9DCT2 (pp) P50516" source="8202" target="8262" cy:directed="1"/>
      <edge id="9297" label="Q9DCT2 (pp) Q9D0S9" source="8202" target="8242" cy:directed="1"/>
      <edge id="9296" label="Q9DCT2 (pp) Q9CPQ1" source="8202" target="8573" cy:directed="1"/>
      <edge id="9295" label="Q9DCT2 (pp) P08249" source="8202" target="8204" cy:directed="1"/>
      <edge id="9294" label="Q9DCT2 (pp) P62073" source="8202" target="8324" cy:directed="1"/>
      <edge id="9293" label="Q9DCT2 (pp) P68510" source="8202" target="8182" cy:directed="1"/>
      <edge id="9292" label="Q9DCT2 (pp) O09111" source="8202" target="8180" cy:directed="1"/>
      <edge id="9291" label="Q9DCT2 (pp) Q62425" source="8202" target="8514" cy:directed="1"/>
      <edge id="9290" label="Q9DCT2 (pp) Q9CQH3" source="8202" target="8209" cy:directed="1"/>
      <edge id="9289" label="Q9DCT2 (pp) O88441" source="8202" target="8264" cy:directed="1"/>
      <edge id="9288" label="Q9DCT2 (pp) Q91VR2" source="8202" target="8232" cy:directed="1"/>
      <edge id="9287" label="Q9DCT2 (pp) Q99KI0" source="8202" target="8307" cy:directed="1"/>
      <edge id="9286" label="Q9DCT2 (pp) Q9D0M3" source="8202" target="8219" cy:directed="1"/>
      <edge id="9285" label="Q9DCT2 (pp) Q9CQ54" source="8202" target="8201" cy:directed="1"/>
      <edge id="9284" label="Q9DCT2 (pp) Q9CPP6" source="8202" target="8250" cy:directed="1"/>
      <edge id="9283" label="Q9DCT2 (pp) Q8VEM8" source="8202" target="8318" cy:directed="1"/>
      <edge id="9282" label="Q9DCT2 (pp) Q9DB20" source="8202" target="8208" cy:directed="1"/>
      <edge id="9281" label="Q9DCT2 (pp) Q9CZ13" source="8202" target="8218" cy:directed="1"/>
      <edge id="9280" label="Q9DCT2 (pp) P56379" source="8202" target="8384" cy:directed="1"/>
      <edge id="9279" label="Q9DCT2 (pp) Q91YT0" source="8202" target="8348" cy:directed="1"/>
      <edge id="9278" label="Q9DCT2 (pp) Q8BH95" source="8202" target="8217" cy:directed="1"/>
      <edge id="9277" label="Q9DCT2 (pp) Q91VD9" source="8202" target="8234" cy:directed="1"/>
      <edge id="9276" label="Q9DCT2 (pp) P52503" source="8202" target="8321" cy:directed="1"/>
      <edge id="9275" label="Q9DCT2 (pp) Q9CQ75" source="8202" target="8358" cy:directed="1"/>
      <edge id="9274" label="Q9DCT2 (pp) Q8K2B3" source="8202" target="8316" cy:directed="1"/>
      <edge id="9273" label="Q9DCT2 (pp) P56480" source="8202" target="8227" cy:directed="1"/>
      <edge id="9272" label="Q9DCT2 (pp) P09671" source="8202" target="8413" cy:directed="1"/>
      <edge id="9271" label="Q9DCT2 (pp) Q9DCJ5" source="8202" target="8349" cy:directed="1"/>
      <edge id="9270" label="Q9DCT2 (pp) Q9CQR4" source="8202" target="8327" cy:directed="1"/>
      <edge id="9269" label="Q9DCT2 (pp) Q9DCX2" source="8202" target="8335" cy:directed="1"/>
      <edge id="9268" label="Q9DCT2 (pp) Q9D855" source="8202" target="8372" cy:directed="1"/>
      <edge id="9267" label="Q9DCT2 (pp) Q9DC69" source="8202" target="8376" cy:directed="1"/>
      <edge id="9266" label="Q9DCT2 (pp) Q9D051" source="8202" target="8178" cy:directed="1"/>
      <edge id="9265" label="Q9DCT2 (pp) P99029" source="8202" target="8325" cy:directed="1"/>
      <edge id="9264" label="Q9DCT2 (pp) Q9CQZ6" source="8202" target="8200" cy:directed="1"/>
      <edge id="9263" label="Q9DCT2 (pp) P42125" source="8202" target="8488" cy:directed="1"/>
      <edge id="9262" label="Q9DCT2 (pp) Q9CR68" source="8202" target="8236" cy:directed="1"/>
      <edge id="9261" label="Q9DCT2 (pp) Q7TMF3" source="8202" target="8334" cy:directed="1"/>
      <edge id="9260" label="Q9DCT2 (pp) Q99LY9" source="8202" target="8221" cy:directed="1"/>
      <edge id="9259" label="Q9DCT2 (pp) Q99LC5" source="8202" target="8284" cy:directed="1"/>
      <edge id="9258" label="Q9DCT2 (pp) Q9CXZ1" source="8202" target="8365" cy:directed="1"/>
      <edge id="9257" label="Q9DCT2 (pp) Q9CQJ8" source="8202" target="8239" cy:directed="1"/>
      <edge id="9256" label="Q9DCT2 (pp) Q9WUM5" source="8202" target="8245" cy:directed="1"/>
      <edge id="9255" label="Q9DCT2 (pp) Q9CQC7" source="8202" target="8463" cy:directed="1"/>
      <edge id="9254" label="Q9DCT2 (pp) Q8BGH2" source="8202" target="8285" cy:directed="1"/>
      <edge id="9253" label="Q9DCT2 (pp) Q03265" source="8202" target="8181" cy:directed="1"/>
      <edge id="9252" label="Q9DCT2 (pp) Q9ERS2" source="8202" target="8308" cy:directed="1"/>
      <edge id="9251" label="Q9DCT2 (pp) P56391" source="8202" target="8300" cy:directed="1"/>
      <edge id="9250" label="Q9DCT2 (pp) Q9D6J5" source="8202" target="8456" cy:directed="1"/>
      <edge id="9249" label="Q9DCT2 (pp) Q91WD5" source="8202" target="8315" cy:directed="1"/>
      <edge id="9248" label="Q9DCT2 (pp) Q8K3J1" source="8202" target="8373" cy:directed="1"/>
      <edge id="9247" label="Q9DCT2 (pp) P17751" source="8202" target="8266" cy:directed="1"/>
      <edge id="9246" label="Q9DCT2 (pp) P48771" source="8202" target="8272" cy:directed="1"/>
      <edge id="9245" label="Q9DCT2 (pp) Q9D3D9" source="8202" target="8179" cy:directed="1"/>
      <edge id="9244" label="Q9DCT2 (pp) Q9DCS9" source="8202" target="8235" cy:directed="1"/>
      <edge id="9243" label="Q9DCT2 (pp) Q9D6J6" source="8202" target="8176" cy:directed="1"/>
      <edge id="9242" label="Q9DCT2 (pp) Q9CQQ7" source="8202" target="8378" cy:directed="1"/>
      <edge id="9241" label="Q9DCT2 (pp) Q9DB77" source="8202" target="8374" cy:directed="1"/>
      <edge id="9240" label="Q9DCT2 (pp) Q3UIU2" source="8202" target="8257" cy:directed="1"/>
      <edge id="9239" label="Q9DCT2 (pp) Q9DC70" source="8202" target="8241" cy:directed="1"/>
      <edge id="9238" label="Q9DCT2 (pp) P19536" source="8202" target="8342" cy:directed="1"/>
      <edge id="9237" label="Q9DCT2 (pp) Q8K1Z0" source="8202" target="8288" cy:directed="1"/>
      <edge id="9236" label="Q9DCT2 (pp) Q9CQA3" source="8202" target="8281" cy:directed="1"/>
      <edge id="9235" label="Q9DCT2 (pp) O70325" source="8202" target="8271" cy:directed="1"/>
      <edge id="9234" label="Q9DCT2 (pp) Q99LC3" source="8202" target="8220" cy:directed="1"/>
      <edge id="9233" label="Q9DCT2 (pp) P19783" source="8202" target="8214" cy:directed="1"/>
      <edge id="9232" label="Q9DCT2 (pp) Q9CQ69" source="8202" target="8203" cy:directed="1"/>
      <edge id="9231" label="Q9CQ54 (pp) Q3UIU2" source="8201" target="8257" cy:directed="1"/>
      <edge id="9230" label="Q9CQ54 (pp) Q9Z1P6" source="8201" target="8268" cy:directed="1"/>
      <edge id="9229" label="Q9CQ54 (pp) Q9CQH3" source="8201" target="8209" cy:directed="1"/>
      <edge id="9228" label="Q9CQ54 (pp) Q99LY9" source="8201" target="8221" cy:directed="1"/>
      <edge id="9227" label="Q9CQ54 (pp) Q9DCS9" source="8201" target="8235" cy:directed="1"/>
      <edge id="9226" label="Q9CQ54 (pp) Q9D6J6" source="8201" target="8176" cy:directed="1"/>
      <edge id="9225" label="Q9CQ54 (pp) Q9CQ69" source="8201" target="8203" cy:directed="1"/>
      <edge id="9224" label="Q9CQ54 (pp) Q8K3J1" source="8201" target="8373" cy:directed="1"/>
      <edge id="9223" label="Q9CQ54 (pp) Q06185" source="8201" target="8240" cy:directed="1"/>
      <edge id="9222" label="Q9CQ54 (pp) Q9DCJ5" source="8201" target="8349" cy:directed="1"/>
      <edge id="9221" label="Q9CQ54 (pp) Q9CQQ7" source="8201" target="8378" cy:directed="1"/>
      <edge id="9220" label="Q9CQ54 (pp) Q9DC69" source="8201" target="8376" cy:directed="1"/>
      <edge id="9219" label="Q9CQ54 (pp) O09111" source="8201" target="8180" cy:directed="1"/>
      <edge id="9218" label="Q9CQ54 (pp) Q91YT0" source="8201" target="8348" cy:directed="1"/>
      <edge id="9217" label="Q9CQZ6 (pp) Q9CQ69" source="8200" target="8203" cy:directed="1"/>
      <edge id="9216" label="Q9CQZ6 (pp) Q99LX0" source="8200" target="8286" cy:directed="1"/>
      <edge id="9215" label="Q9CQZ6 (pp) Q9CQQ7" source="8200" target="8378" cy:directed="1"/>
      <edge id="9214" label="Q9CQZ6 (pp) P48771" source="8200" target="8272" cy:directed="1"/>
      <edge id="9213" label="Q9CQZ6 (pp) Q9DCJ5" source="8200" target="8349" cy:directed="1"/>
      <edge id="9212" label="Q9CQZ6 (pp) Q99LC5" source="8200" target="8284" cy:directed="1"/>
      <edge id="9211" label="Q9CQZ6 (pp) Q9CPQ8" source="8200" target="8233" cy:directed="1"/>
      <edge id="9210" label="Q9CQZ6 (pp) Q9Z1P6" source="8200" target="8268" cy:directed="1"/>
      <edge id="9209" label="Q9CQZ6 (pp) Q9DC69" source="8200" target="8376" cy:directed="1"/>
      <edge id="9208" label="Q9CQZ6 (pp) P56391" source="8200" target="8300" cy:directed="1"/>
      <edge id="9207" label="Q9CQZ6 (pp) Q9DB77" source="8200" target="8374" cy:directed="1"/>
      <edge id="9206" label="Q9CQZ6 (pp) Q9DCX2" source="8200" target="8335" cy:directed="1"/>
      <edge id="9205" label="Q9CQZ6 (pp) Q99LY9" source="8200" target="8221" cy:directed="1"/>
      <edge id="9204" label="Q9CQZ6 (pp) Q91VR2" source="8200" target="8232" cy:directed="1"/>
      <edge id="9203" label="Q9CQZ6 (pp) Q91YT0" source="8200" target="8348" cy:directed="1"/>
      <edge id="9202" label="Q9CQZ6 (pp) Q8K3J1" source="8200" target="8373" cy:directed="1"/>
      <edge id="9201" label="Q9CQZ6 (pp) Q9ERS2" source="8200" target="8308" cy:directed="1"/>
      <edge id="9200" label="Q9CQZ6 (pp) Q62425" source="8200" target="8514" cy:directed="1"/>
      <edge id="9199" label="Q9CQZ6 (pp) Q9WUM5" source="8200" target="8245" cy:directed="1"/>
      <edge id="9198" label="Q9CQZ6 (pp) Q9D6J6" source="8200" target="8176" cy:directed="1"/>
      <edge id="9197" label="Q9CQZ6 (pp) Q06185" source="8200" target="8240" cy:directed="1"/>
      <edge id="9196" label="Q9CQZ6 (pp) Q9DCS9" source="8200" target="8235" cy:directed="1"/>
      <edge id="9195" label="Q9CQZ6 (pp) Q9CR68" source="8200" target="8236" cy:directed="1"/>
      <edge id="9194" label="Q9CQZ6 (pp) Q9CQH3" source="8200" target="8209" cy:directed="1"/>
      <edge id="9193" label="Q9CQZ6 (pp) Q3UIU2" source="8200" target="8257" cy:directed="1"/>
      <edge id="9192" label="Q9CQZ6 (pp) Q99LC3" source="8200" target="8220" cy:directed="1"/>
      <edge id="9191" label="Q9CQZ6 (pp) Q9CQ54" source="8200" target="8201" cy:directed="1"/>
      <edge id="9190" label="Q76MZ3 (pp) Q9DC28" source="8199" target="8621" cy:directed="1"/>
      <edge id="9189" label="Q76MZ3 (pp) Q61151" source="8199" target="8722" cy:directed="1"/>
      <edge id="9188" label="Q76MZ3 (pp) P18052" source="8199" target="8383" cy:directed="1"/>
      <edge id="9187" label="Q76MZ3 (pp) P61982" source="8199" target="8478" cy:directed="1"/>
      <edge id="9186" label="Q76MZ3 (pp) P62259" source="8199" target="8194" cy:directed="1"/>
      <edge id="9185" label="Q76MZ3 (pp) P50396" source="8199" target="8616" cy:directed="1"/>
      <edge id="9184" label="Q76MZ3 (pp) Q60996" source="8199" target="8555" cy:directed="1"/>
      <edge id="9183" label="Q76MZ3 (pp) Q99KJ8" source="8199" target="8305" cy:directed="1"/>
      <edge id="9182" label="Q76MZ3 (pp) P35438" source="8199" target="8184" cy:directed="1"/>
      <edge id="9181" label="Q76MZ3 (pp) P63101" source="8199" target="8448" cy:directed="1"/>
      <edge id="9180" label="Q76MZ3 (pp) O08788" source="8199" target="8306" cy:directed="1"/>
      <edge id="9179" label="Q76MZ3 (pp) Q6P1F6" source="8199" target="8598" cy:directed="1"/>
      <edge id="9178" label="P63330 (pp) Q6P1F6" source="8198" target="8598" cy:directed="1"/>
      <edge id="9177" label="P63330 (pp) P35438" source="8198" target="8184" cy:directed="1"/>
      <edge id="9176" label="P63330 (pp) Q61151" source="8198" target="8722" cy:directed="1"/>
      <edge id="9175" label="P63330 (pp) Q60996" source="8198" target="8555" cy:directed="1"/>
      <edge id="9174" label="P63330 (pp) Q76MZ3" source="8198" target="8199" cy:directed="1"/>
      <edge id="9173" label="P16546 (pp) O08788" source="8197" target="8306" cy:directed="1"/>
      <edge id="9172" label="P16546 (pp) Q9CQV8" source="8197" target="8326" cy:directed="1"/>
      <edge id="9171" label="Q8C8R3 (pp) P11627" source="8196" target="8530" cy:directed="1"/>
      <edge id="9170" label="Q8C8R3 (pp) P16546" source="8196" target="8197" cy:directed="1"/>
      <edge id="9169" label="P47757 (pp) O89053" source="8195" target="8763" cy:directed="1"/>
      <edge id="9168" label="P62259 (pp) Q812A2" source="8194" target="8769" cy:directed="1"/>
      <edge id="9167" label="P62259 (pp) Q3UTJ2" source="8194" target="8434" cy:directed="1"/>
      <edge id="9166" label="P62259 (pp) Q68FF6" source="8194" target="8552" cy:directed="1"/>
      <edge id="9165" label="P62259 (pp) Q61316" source="8194" target="8710" cy:directed="1"/>
      <edge id="9164" label="P62259 (pp) P30999" source="8194" target="8553" cy:directed="1"/>
      <edge id="9163" label="P62259 (pp) Q03265" source="8194" target="8181" cy:directed="1"/>
      <edge id="9162" label="P62259 (pp) Q9DC28" source="8194" target="8621" cy:directed="1"/>
      <edge id="9161" label="P62259 (pp) P16858" source="8194" target="8528" cy:directed="1"/>
      <edge id="9160" label="P62259 (pp) Q9QWI6" source="8194" target="8449" cy:directed="1"/>
      <edge id="9159" label="P62259 (pp) P63101" source="8194" target="8448" cy:directed="1"/>
      <edge id="9158" label="P62259 (pp) P10637" source="8194" target="8503" cy:directed="1"/>
      <edge id="9157" label="P62259 (pp) O88935" source="8194" target="8400" cy:directed="1"/>
      <edge id="9156" label="P62259 (pp) Q9JLM8" source="8194" target="8397" cy:directed="1"/>
      <edge id="9155" label="P62259 (pp) P46660" source="8194" target="8370" cy:directed="1"/>
      <edge id="9154" label="P62259 (pp) P47757" source="8194" target="8195" cy:directed="1"/>
      <edge id="9153" label="Q9Z1G3 (pp) P23506" source="8193" target="8455" cy:directed="1"/>
      <edge id="9152" label="Q9Z1G3 (pp) P63082" source="8193" target="8417" cy:directed="1"/>
      <edge id="9151" label="Q9Z1G3 (pp) Q8BVE3" source="8193" target="8339" cy:directed="1"/>
      <edge id="9150" label="Q9Z1G3 (pp) Q91VM9" source="8193" target="8375" cy:directed="1"/>
      <edge id="9149" label="Q9Z1G3 (pp) P50516" source="8193" target="8262" cy:directed="1"/>
      <edge id="9148" label="Q9Z1G3 (pp) Q9Z1G4" source="8193" target="8244" cy:directed="1"/>
      <edge id="9147" label="Q9Z1G3 (pp) Q9WTT4" source="8193" target="8458" cy:directed="1"/>
      <edge id="9146" label="Q9Z1G3 (pp) P62331" source="8193" target="8287" cy:directed="1"/>
      <edge id="9145" label="P51863 (pp) Q9WTT4" source="8192" target="8458" cy:directed="1"/>
      <edge id="9144" label="P51863 (pp) P50518" source="8192" target="8338" cy:directed="1"/>
      <edge id="9143" label="P51863 (pp) Q9EPJ9" source="8192" target="8639" cy:directed="1"/>
      <edge id="9142" label="P51863 (pp) Q9Z1G4" source="8192" target="8244" cy:directed="1"/>
      <edge id="9141" label="P51863 (pp) P57746" source="8192" target="8261" cy:directed="1"/>
      <edge id="9140" label="P51863 (pp) P50516" source="8192" target="8262" cy:directed="1"/>
      <edge id="9139" label="P51863 (pp) Q8BVE3" source="8192" target="8339" cy:directed="1"/>
      <edge id="9138" label="P51863 (pp) P63082" source="8192" target="8417" cy:directed="1"/>
      <edge id="9137" label="P51863 (pp) Q9Z1G3" source="8192" target="8193" cy:directed="1"/>
      <edge id="9136" label="Q9DCD0 (pp) Q8CAQ8" source="8191" target="8522" cy:directed="1"/>
      <edge id="9135" label="Q9DCD0 (pp) P06151" source="8191" target="8207" cy:directed="1"/>
      <edge id="9134" label="Q9DCD0 (pp) Q91ZJ5" source="8191" target="8583" cy:directed="1"/>
      <edge id="9133" label="Q9DCD0 (pp) Q8BMS1" source="8191" target="8485" cy:directed="1"/>
      <edge id="9132" label="Q9DCD0 (pp) Q9D0F9" source="8191" target="8604" cy:directed="1"/>
      <edge id="9131" label="Q9CZU6 (pp) P19096" source="8190" target="8655" cy:directed="1"/>
      <edge id="9130" label="Q9CZU6 (pp) Q9CR68" source="8190" target="8236" cy:directed="1"/>
      <edge id="9129" label="Q9CZU6 (pp) Q9CZ13" source="8190" target="8218" cy:directed="1"/>
      <edge id="9128" label="Q9CZU6 (pp) Q9D6J6" source="8190" target="8176" cy:directed="1"/>
      <edge id="9127" label="Q9CZU6 (pp) Q05920" source="8190" target="8223" cy:directed="1"/>
      <edge id="9126" label="Q9CZU6 (pp) Q9D2G2" source="8190" target="8256" cy:directed="1"/>
      <edge id="9125" label="Q9CZU6 (pp) P56480" source="8190" target="8227" cy:directed="1"/>
      <edge id="9124" label="Q9CZU6 (pp) Q8QZT1" source="8190" target="8526" cy:directed="1"/>
      <edge id="9123" label="Q9CZU6 (pp) Q9WUM5" source="8190" target="8245" cy:directed="1"/>
      <edge id="9122" label="Q9CZU6 (pp) P70404" source="8190" target="8263" cy:directed="1"/>
      <edge id="9121" label="Q9CZU6 (pp) Q9D6R2" source="8190" target="8205" cy:directed="1"/>
      <edge id="9120" label="Q9CZU6 (pp) Q9DB20" source="8190" target="8208" cy:directed="1"/>
      <edge id="9119" label="Q9CZU6 (pp) Q60597" source="8190" target="8480" cy:directed="1"/>
      <edge id="9118" label="Q9CZU6 (pp) Q8BGH2" source="8190" target="8285" cy:directed="1"/>
      <edge id="9117" label="Q9CZU6 (pp) P35486" source="8190" target="8408" cy:directed="1"/>
      <edge id="9116" label="Q9CZU6 (pp) Q8BH04" source="8190" target="8593" cy:directed="1"/>
      <edge id="9115" label="Q9CZU6 (pp) Q8BMF4" source="8190" target="8222" cy:directed="1"/>
      <edge id="9114" label="Q9CZU6 (pp) Q99JY0" source="8190" target="8353" cy:directed="1"/>
      <edge id="9113" label="Q9CZU6 (pp) Q9CQA3" source="8190" target="8281" cy:directed="1"/>
      <edge id="9112" label="Q9CZU6 (pp) Q9D0M3" source="8190" target="8219" cy:directed="1"/>
      <edge id="9111" label="Q9CZU6 (pp) P09671" source="8190" target="8413" cy:directed="1"/>
      <edge id="9110" label="Q9CZU6 (pp) P52480" source="8190" target="8424" cy:directed="1"/>
      <edge id="9109" label="Q9CZU6 (pp) Q03265" source="8190" target="8181" cy:directed="1"/>
      <edge id="9108" label="Q9CZU6 (pp) Q91YT0" source="8190" target="8348" cy:directed="1"/>
      <edge id="9107" label="Q9CZU6 (pp) Q91WD5" source="8190" target="8315" cy:directed="1"/>
      <edge id="9106" label="Q9CZU6 (pp) Q8BWT1" source="8190" target="8280" cy:directed="1"/>
      <edge id="9105" label="Q9CZU6 (pp) Q99KI0" source="8190" target="8307" cy:directed="1"/>
      <edge id="9104" label="Q9CZU6 (pp) Q8K2B3" source="8190" target="8316" cy:directed="1"/>
      <edge id="9103" label="Q9CZU6 (pp) P06151" source="8190" target="8207" cy:directed="1"/>
      <edge id="9102" label="Q9CZU6 (pp) P97807" source="8190" target="8309" cy:directed="1"/>
      <edge id="9101" label="Q9CZU6 (pp) Q91VR2" source="8190" target="8232" cy:directed="1"/>
      <edge id="9100" label="Q9CZU6 (pp) P08249" source="8190" target="8204" cy:directed="1"/>
      <edge id="9099" label="Q9CZU6 (pp) P26443" source="8190" target="8303" cy:directed="1"/>
      <edge id="9098" label="Q9CZU6 (pp) Q8BMF3" source="8190" target="8513" cy:directed="1"/>
      <edge id="9097" label="Q9CZU6 (pp) Q8BKZ9" source="8190" target="8482" cy:directed="1"/>
      <edge id="9096" label="Q9CZU6 (pp) P05202" source="8190" target="8185" cy:directed="1"/>
      <edge id="9095" label="Q9CZU6 (pp) Q91VD9" source="8190" target="8234" cy:directed="1"/>
      <edge id="9094" label="Q9CZU6 (pp) Q9DCD0" source="8190" target="8191" cy:directed="1"/>
      <edge id="9093" label="P35436 (pp) P35438" source="8189" target="8184" cy:directed="1"/>
      <edge id="9092" label="P23819 (pp) P16330" source="8188" target="8534" cy:directed="1"/>
      <edge id="9091" label="P23819 (pp) P38647" source="8188" target="8515" cy:directed="1"/>
      <edge id="9090" label="P23819 (pp) O08599" source="8188" target="8643" cy:directed="1"/>
      <edge id="9089" label="P23819 (pp) P99024" source="8188" target="8536" cy:directed="1"/>
      <edge id="9088" label="P23819 (pp) P68369" source="8188" target="8317" cy:directed="1"/>
      <edge id="9087" label="P23819 (pp) P35436" source="8188" target="8189" cy:directed="1"/>
      <edge id="9086" label="Q06335 (pp) Q03157" source="8187" target="8726" cy:directed="1"/>
      <edge id="9085" label="Q06335 (pp) P63001" source="8187" target="8367" cy:directed="1"/>
      <edge id="9084" label="Q06335 (pp) P12023" source="8187" target="8294" cy:directed="1"/>
      <edge id="9083" label="Q06335 (pp) P04925" source="8187" target="8354" cy:directed="1"/>
      <edge id="9082" label="Q06335 (pp) P63330" source="8187" target="8198" cy:directed="1"/>
      <edge id="9081" label="Q06335 (pp) Q9QXJ1" source="8187" target="8539" cy:directed="1"/>
      <edge id="9080" label="Q9QUI0 (pp) O88643" source="8186" target="8695" cy:directed="1"/>
      <edge id="9079" label="Q9QUI0 (pp) P63001" source="8186" target="8367" cy:directed="1"/>
      <edge id="9078" label="Q9QUI0 (pp) P30999" source="8186" target="8553" cy:directed="1"/>
      <edge id="9077" label="Q9QUI0 (pp) Q99PT1" source="8186" target="8402" cy:directed="1"/>
      <edge id="9076" label="Q9QUI0 (pp) Q06335" source="8186" target="8187" cy:directed="1"/>
      <edge id="9075" label="P05202 (pp) P70404" source="8185" target="8263" cy:directed="1"/>
      <edge id="9074" label="P05202 (pp) P06151" source="8185" target="8207" cy:directed="1"/>
      <edge id="9073" label="P05202 (pp) Q8BH04" source="8185" target="8593" cy:directed="1"/>
      <edge id="9072" label="P05202 (pp) Q05920" source="8185" target="8223" cy:directed="1"/>
      <edge id="9071" label="P05202 (pp) Q60597" source="8185" target="8480" cy:directed="1"/>
      <edge id="9070" label="P05202 (pp) Q9D6R2" source="8185" target="8205" cy:directed="1"/>
      <edge id="9069" label="P05202 (pp) P54071" source="8185" target="8206" cy:directed="1"/>
      <edge id="9068" label="P35438 (pp) P11627" source="8184" target="8530" cy:directed="1"/>
      <edge id="9067" label="P35438 (pp) F6SEU4" source="8184" target="8732" cy:directed="1"/>
      <edge id="9066" label="P35438 (pp) O35526" source="8184" target="8298" cy:directed="1"/>
      <edge id="9065" label="P35438 (pp) P12367" source="8184" target="8386" cy:directed="1"/>
      <edge id="9064" label="P35438 (pp) P63017" source="8184" target="8389" cy:directed="1"/>
      <edge id="9063" label="P35438 (pp) A2CG49" source="8184" target="8761" cy:directed="1"/>
      <edge id="9062" label="P35438 (pp) O88737" source="8184" target="8464" cy:directed="1"/>
      <edge id="9061" label="P35438 (pp) Q6URW6" source="8184" target="8756" cy:directed="1"/>
      <edge id="9060" label="P35438 (pp) Q8BMF4" source="8184" target="8222" cy:directed="1"/>
      <edge id="9059" label="P35438 (pp) P57780" source="8184" target="8703" cy:directed="1"/>
      <edge id="9058" label="P35438 (pp) O55100" source="8184" target="8651" cy:directed="1"/>
      <edge id="9057" label="P35438 (pp) P62259" source="8184" target="8194" cy:directed="1"/>
      <edge id="9056" label="P35438 (pp) P68368" source="8184" target="8501" cy:directed="1"/>
      <edge id="9055" label="P35438 (pp) P06837" source="8184" target="8476" cy:directed="1"/>
      <edge id="9054" label="P35438 (pp) P68033" source="8184" target="8540" cy:directed="1"/>
      <edge id="9053" label="P35438 (pp) Q60631" source="8184" target="8322" cy:directed="1"/>
      <edge id="9052" label="P35438 (pp) Q6PIC6" source="8184" target="8602" cy:directed="1"/>
      <edge id="9051" label="P35438 (pp) P28652" source="8184" target="8545" cy:directed="1"/>
      <edge id="9050" label="P12382 (pp) P17751" source="8183" target="8266" cy:directed="1"/>
      <edge id="9049" label="P12382 (pp) P47857" source="8183" target="8500" cy:directed="1"/>
      <edge id="9048" label="P12382 (pp) P52480" source="8183" target="8424" cy:directed="1"/>
      <edge id="9047" label="P12382 (pp) P06745" source="8183" target="8433" cy:directed="1"/>
      <edge id="9046" label="P12382 (pp) P63101" source="8183" target="8448" cy:directed="1"/>
      <edge id="9045" label="P12382 (pp) Q93092" source="8183" target="8423" cy:directed="1"/>
      <edge id="9044" label="P12382 (pp) P05064" source="8183" target="8290" cy:directed="1"/>
      <edge id="9043" label="P12382 (pp) P05063" source="8183" target="8481" cy:directed="1"/>
      <edge id="9042" label="P12382 (pp) P17710" source="8183" target="8291" cy:directed="1"/>
      <edge id="9041" label="P12382 (pp) P35438" source="8183" target="8184" cy:directed="1"/>
      <edge id="9040" label="P68510 (pp) P62259" source="8182" target="8194" cy:directed="1"/>
      <edge id="9039" label="P68510 (pp) Q9DCJ5" source="8182" target="8349" cy:directed="1"/>
      <edge id="9038" label="P68510 (pp) Q9CQW1" source="8182" target="8739" cy:directed="1"/>
      <edge id="9037" label="P68510 (pp) P56480" source="8182" target="8227" cy:directed="1"/>
      <edge id="9036" label="P68510 (pp) Q9D051" source="8182" target="8178" cy:directed="1"/>
      <edge id="9035" label="P68510 (pp) P11499" source="8182" target="8289" cy:directed="1"/>
      <edge id="9034" label="P68510 (pp) Q9WV55" source="8182" target="8692" cy:directed="1"/>
      <edge id="9033" label="P68510 (pp) Q9DCW4" source="8182" target="8249" cy:directed="1"/>
      <edge id="9032" label="P68510 (pp) Q60930" source="8182" target="8646" cy:directed="1"/>
      <edge id="9031" label="P68510 (pp) P46460" source="8182" target="8252" cy:directed="1"/>
      <edge id="9030" label="P68510 (pp) P42208" source="8182" target="8676" cy:directed="1"/>
      <edge id="9029" label="P68510 (pp) Q9ERS2" source="8182" target="8308" cy:directed="1"/>
      <edge id="9028" label="P68510 (pp) P54071" source="8182" target="8206" cy:directed="1"/>
      <edge id="9027" label="P68510 (pp) Q68FD5" source="8182" target="8345" cy:directed="1"/>
      <edge id="9026" label="P68510 (pp) Q9CWS0" source="8182" target="8744" cy:directed="1"/>
      <edge id="9025" label="P68510 (pp) P12787" source="8182" target="8282" cy:directed="1"/>
      <edge id="9024" label="P68510 (pp) P50518" source="8182" target="8338" cy:directed="1"/>
      <edge id="9023" label="P68510 (pp) P48036" source="8182" target="8708" cy:directed="1"/>
      <edge id="9022" label="P68510 (pp) P63101" source="8182" target="8448" cy:directed="1"/>
      <edge id="9021" label="P68510 (pp) Q9R0Q6" source="8182" target="8346" cy:directed="1"/>
      <edge id="9020" label="P68510 (pp) P61164" source="8182" target="8650" cy:directed="1"/>
      <edge id="9019" label="P68510 (pp) P10637" source="8182" target="8503" cy:directed="1"/>
      <edge id="9018" label="P68510 (pp) O55042" source="8182" target="8585" cy:directed="1"/>
      <edge id="9017" label="P68510 (pp) P67871" source="8182" target="8631" cy:directed="1"/>
      <edge id="9016" label="P68510 (pp) Q61553" source="8182" target="8629" cy:directed="1"/>
      <edge id="9015" label="P68510 (pp) P08249" source="8182" target="8204" cy:directed="1"/>
      <edge id="9014" label="P68510 (pp) Q8VBV7" source="8182" target="8622" cy:directed="1"/>
      <edge id="9013" label="P68510 (pp) Q91VZ6" source="8182" target="8607" cy:directed="1"/>
      <edge id="9012" label="P68510 (pp) Q9CQ92" source="8182" target="8418" cy:directed="1"/>
      <edge id="9011" label="P68510 (pp) Q9D8B3" source="8182" target="8587" cy:directed="1"/>
      <edge id="9010" label="P68510 (pp) P68368" source="8182" target="8501" cy:directed="1"/>
      <edge id="9009" label="P68510 (pp) Q99PT1" source="8182" target="8402" cy:directed="1"/>
      <edge id="9008" label="P68510 (pp) P17751" source="8182" target="8266" cy:directed="1"/>
      <edge id="9007" label="P68510 (pp) P05202" source="8182" target="8185" cy:directed="1"/>
      <edge id="9006" label="Q03265 (pp) P43024" source="8181" target="8441" cy:directed="1"/>
      <edge id="9005" label="Q03265 (pp) Q9CQH3" source="8181" target="8209" cy:directed="1"/>
      <edge id="9004" label="Q03265 (pp) Q9D6J6" source="8181" target="8176" cy:directed="1"/>
      <edge id="9003" label="Q03265 (pp) O35143" source="8181" target="8672" cy:directed="1"/>
      <edge id="9002" label="Q03265 (pp) Q9CQQ7" source="8181" target="8378" cy:directed="1"/>
      <edge id="9001" label="Q03265 (pp) P03930" source="8181" target="8357" cy:directed="1"/>
      <edge id="9000" label="Q03265 (pp) P19536" source="8181" target="8342" cy:directed="1"/>
      <edge id="8999" label="Q03265 (pp) P48962" source="8181" target="8667" cy:directed="1"/>
      <edge id="8998" label="Q03265 (pp) Q9D3D9" source="8181" target="8179" cy:directed="1"/>
      <edge id="8997" label="Q03265 (pp) Q9D2G2" source="8181" target="8256" cy:directed="1"/>
      <edge id="8996" label="Q03265 (pp) Q8VEM8" source="8181" target="8318" cy:directed="1"/>
      <edge id="8995" label="Q03265 (pp) Q60931" source="8181" target="8525" cy:directed="1"/>
      <edge id="8994" label="Q03265 (pp) P63038" source="8181" target="8216" cy:directed="1"/>
      <edge id="8993" label="Q03265 (pp) Q9DB77" source="8181" target="8374" cy:directed="1"/>
      <edge id="8992" label="Q03265 (pp) Q06185" source="8181" target="8240" cy:directed="1"/>
      <edge id="8991" label="Q03265 (pp) Q9WUM5" source="8181" target="8245" cy:directed="1"/>
      <edge id="8990" label="Q03265 (pp) Q91YT0" source="8181" target="8348" cy:directed="1"/>
      <edge id="8989" label="Q03265 (pp) Q91VR2" source="8181" target="8232" cy:directed="1"/>
      <edge id="8988" label="Q03265 (pp) Q9R0Y5" source="8181" target="8541" cy:directed="1"/>
      <edge id="8987" label="Q03265 (pp) Q99LC5" source="8181" target="8284" cy:directed="1"/>
      <edge id="8986" label="Q03265 (pp) Q8K3J1" source="8181" target="8373" cy:directed="1"/>
      <edge id="8985" label="Q03265 (pp) P09411" source="8181" target="8267" cy:directed="1"/>
      <edge id="8984" label="Q03265 (pp) P16054" source="8181" target="8412" cy:directed="1"/>
      <edge id="8983" label="Q03265 (pp) P97807" source="8181" target="8309" cy:directed="1"/>
      <edge id="8982" label="Q03265 (pp) Q9CZ13" source="8181" target="8218" cy:directed="1"/>
      <edge id="8981" label="Q03265 (pp) Q91VD9" source="8181" target="8234" cy:directed="1"/>
      <edge id="8980" label="Q03265 (pp) Q9DCX2" source="8181" target="8335" cy:directed="1"/>
      <edge id="8979" label="Q03265 (pp) Q9CR68" source="8181" target="8236" cy:directed="1"/>
      <edge id="8978" label="Q03265 (pp) Q9DC69" source="8181" target="8376" cy:directed="1"/>
      <edge id="8977" label="Q03265 (pp) Q91VM9" source="8181" target="8375" cy:directed="1"/>
      <edge id="8976" label="Q03265 (pp) P68510" source="8181" target="8182" cy:directed="1"/>
      <edge id="8975" label="O09111 (pp) Q9D6J6" source="8180" target="8176" cy:directed="1"/>
      <edge id="8974" label="O09111 (pp) Q9CQH3" source="8180" target="8209" cy:directed="1"/>
      <edge id="8973" label="Q9D3D9 (pp) Q9D6J6" source="8179" target="8176" cy:directed="1"/>
      <edge id="8972" label="Q9D3D9 (pp) Q99LY9" source="8179" target="8221" cy:directed="1"/>
      <edge id="8971" label="Q9D3D9 (pp) Q91VR2" source="8179" target="8232" cy:directed="1"/>
      <edge id="8970" label="Q9D3D9 (pp) Q9CQH3" source="8179" target="8209" cy:directed="1"/>
      <edge id="8969" label="Q9D3D9 (pp) Q9ERS2" source="8179" target="8308" cy:directed="1"/>
      <edge id="8968" label="Q9D3D9 (pp) O09111" source="8179" target="8180" cy:directed="1"/>
      <edge id="8967" label="Q9D051 (pp) P06745" source="8178" target="8433" cy:directed="1"/>
      <edge id="8966" label="Q9D051 (pp) Q93092" source="8178" target="8423" cy:directed="1"/>
      <edge id="8965" label="Q9D051 (pp) P35486" source="8178" target="8408" cy:directed="1"/>
      <edge id="8964" label="Q9D051 (pp) Q99LC5" source="8178" target="8284" cy:directed="1"/>
      <edge id="8963" label="Q9D051 (pp) Q9DCJ5" source="8178" target="8349" cy:directed="1"/>
      <edge id="8962" label="Q9D051 (pp) Q05920" source="8178" target="8223" cy:directed="1"/>
      <edge id="8961" label="Q9D051 (pp) Q9CR68" source="8178" target="8236" cy:directed="1"/>
      <edge id="8960" label="Q9D051 (pp) Q9D2G2" source="8178" target="8256" cy:directed="1"/>
      <edge id="8959" label="Q9D051 (pp) Q9D0M3" source="8178" target="8219" cy:directed="1"/>
      <edge id="8958" label="Q9D051 (pp) Q9CQH3" source="8178" target="8209" cy:directed="1"/>
      <edge id="8957" label="Q9D051 (pp) P97807" source="8178" target="8309" cy:directed="1"/>
      <edge id="8956" label="Q9D051 (pp) Q8BMF3" source="8178" target="8513" cy:directed="1"/>
      <edge id="8955" label="Q9D051 (pp) P97450" source="8178" target="8399" cy:directed="1"/>
      <edge id="8954" label="Q9D051 (pp) P06151" source="8178" target="8207" cy:directed="1"/>
      <edge id="8953" label="Q9D051 (pp) P16054" source="8178" target="8412" cy:directed="1"/>
      <edge id="8952" label="Q9D051 (pp) P40142" source="8178" target="8328" cy:directed="1"/>
      <edge id="8951" label="Q9D051 (pp) Q9D6R2" source="8178" target="8205" cy:directed="1"/>
      <edge id="8950" label="Q9D051 (pp) P52480" source="8178" target="8424" cy:directed="1"/>
      <edge id="8949" label="Q9D051 (pp) Q9CQQ7" source="8178" target="8378" cy:directed="1"/>
      <edge id="8948" label="Q9D051 (pp) P63101" source="8178" target="8448" cy:directed="1"/>
      <edge id="8947" label="Q9D051 (pp) Q9DB77" source="8178" target="8374" cy:directed="1"/>
      <edge id="8946" label="Q9D051 (pp) Q8BMF4" source="8178" target="8222" cy:directed="1"/>
      <edge id="8945" label="Q9D051 (pp) Q91VD9" source="8178" target="8234" cy:directed="1"/>
      <edge id="8944" label="Q9D051 (pp) Q03265" source="8178" target="8181" cy:directed="1"/>
      <edge id="8943" label="O08749 (pp) P56480" source="8177" target="8227" cy:directed="1"/>
      <edge id="8942" label="O08749 (pp) Q9DC69" source="8177" target="8376" cy:directed="1"/>
      <edge id="8941" label="O08749 (pp) Q91ZJ5" source="8177" target="8583" cy:directed="1"/>
      <edge id="8940" label="O08749 (pp) P35486" source="8177" target="8408" cy:directed="1"/>
      <edge id="8939" label="O08749 (pp) Q9D6R2" source="8177" target="8205" cy:directed="1"/>
      <edge id="8938" label="O08749 (pp) Q9D2G2" source="8177" target="8256" cy:directed="1"/>
      <edge id="8937" label="O08749 (pp) P08249" source="8177" target="8204" cy:directed="1"/>
      <edge id="8936" label="O08749 (pp) Q9DB77" source="8177" target="8374" cy:directed="1"/>
      <edge id="8935" label="O08749 (pp) P52480" source="8177" target="8424" cy:directed="1"/>
      <edge id="8934" label="O08749 (pp) Q9CQA3" source="8177" target="8281" cy:directed="1"/>
      <edge id="8933" label="O08749 (pp) Q9CZU6" source="8177" target="8190" cy:directed="1"/>
      <edge id="8932" label="O08749 (pp) Q8K2B3" source="8177" target="8316" cy:directed="1"/>
      <edge id="8931" label="O08749 (pp) Q91VR2" source="8177" target="8232" cy:directed="1"/>
      <edge id="8930" label="O08749 (pp) P09671" source="8177" target="8413" cy:directed="1"/>
      <edge id="8929" label="O08749 (pp) Q9CQH3" source="8177" target="8209" cy:directed="1"/>
      <edge id="8928" label="O08749 (pp) Q91VD9" source="8177" target="8234" cy:directed="1"/>
      <edge id="8927" label="O08749 (pp) O88441" source="8177" target="8264" cy:directed="1"/>
      <edge id="8926" label="O08749 (pp) P99029" source="8177" target="8325" cy:directed="1"/>
      <edge id="8925" label="O08749 (pp) P63038" source="8177" target="8216" cy:directed="1"/>
      <edge id="8924" label="O08749 (pp) Q8BMF4" source="8177" target="8222" cy:directed="1"/>
      <edge id="8923" label="O08749 (pp) Q8BKZ9" source="8177" target="8482" cy:directed="1"/>
      <edge id="8922" label="O08749 (pp) Q9D6J6" source="8177" target="8176" cy:directed="1"/>
      <edge id="8921" label="O08749 (pp) Q60597" source="8177" target="8480" cy:directed="1"/>
      <edge id="8920" label="O08749 (pp) Q9WUM5" source="8177" target="8245" cy:directed="1"/>
      <edge id="8919" label="O08749 (pp) Q9Z2I9" source="8177" target="8427" cy:directed="1"/>
      <edge id="8918" label="O08749 (pp) Q99KI0" source="8177" target="8307" cy:directed="1"/>
      <edge id="8917" label="O08749 (pp) Q60931" source="8177" target="8525" cy:directed="1"/>
      <edge id="8916" label="O08749 (pp) Q6PB66" source="8177" target="8467" cy:directed="1"/>
      <edge id="8915" label="O08749 (pp) Q99LC5" source="8177" target="8284" cy:directed="1"/>
      <edge id="8914" label="O08749 (pp) Q03265" source="8177" target="8181" cy:directed="1"/>
      <edge id="8913" label="O08749 (pp) Q91YT0" source="8177" target="8348" cy:directed="1"/>
      <edge id="8912" label="O08749 (pp) P97807" source="8177" target="8309" cy:directed="1"/>
      <edge id="8911" label="O08749 (pp) Q9D051" source="8177" target="8178" cy:directed="1"/>
      <edge id="8910" label="Q9D6J6 (pp) Q01097" source="8176" target="8173" cy:directed="1"/>
      <edge id="8909" label="Q9CQZ5 (pp) Q9Z1P6" source="8175" target="8268" cy:directed="1"/>
      <edge id="8908" label="Q9CQZ5 (pp) Q9DB77" source="8175" target="8374" cy:directed="1"/>
      <edge id="8907" label="Q9CQZ5 (pp) Q9CQH3" source="8175" target="8209" cy:directed="1"/>
      <edge id="8906" label="Q9CQZ5 (pp) Q99LX0" source="8175" target="8286" cy:directed="1"/>
      <edge id="8905" label="Q9CQZ5 (pp) Q9D0M3" source="8175" target="8219" cy:directed="1"/>
      <edge id="8904" label="Q9CQZ5 (pp) Q8K3J1" source="8175" target="8373" cy:directed="1"/>
      <edge id="8903" label="Q9CQZ5 (pp) Q9DCJ5" source="8175" target="8349" cy:directed="1"/>
      <edge id="8902" label="Q9CQZ5 (pp) Q9WUM5" source="8175" target="8245" cy:directed="1"/>
      <edge id="8901" label="Q9CQZ5 (pp) Q9ERS2" source="8175" target="8308" cy:directed="1"/>
      <edge id="8900" label="Q9CQZ5 (pp) Q9D3D9" source="8175" target="8179" cy:directed="1"/>
      <edge id="8899" label="Q9CQZ5 (pp) Q9CQ54" source="8175" target="8201" cy:directed="1"/>
      <edge id="8898" label="Q9CQZ5 (pp) Q9DB20" source="8175" target="8208" cy:directed="1"/>
      <edge id="8897" label="Q9CQZ5 (pp) Q9DCX2" source="8175" target="8335" cy:directed="1"/>
      <edge id="8896" label="Q9CQZ5 (pp) Q06185" source="8175" target="8240" cy:directed="1"/>
      <edge id="8895" label="Q9CQZ5 (pp) Q9DCS9" source="8175" target="8235" cy:directed="1"/>
      <edge id="8894" label="Q9CQZ5 (pp) Q9D6J5" source="8175" target="8456" cy:directed="1"/>
      <edge id="8893" label="Q9CQZ5 (pp) Q99LC3" source="8175" target="8220" cy:directed="1"/>
      <edge id="8892" label="Q9CQZ5 (pp) Q9D0S9" source="8175" target="8242" cy:directed="1"/>
      <edge id="8891" label="Q9CQZ5 (pp) Q9DC69" source="8175" target="8376" cy:directed="1"/>
      <edge id="8890" label="Q9CQZ5 (pp) Q9CZ13" source="8175" target="8218" cy:directed="1"/>
      <edge id="8889" label="Q9CQZ5 (pp) Q9CR68" source="8175" target="8236" cy:directed="1"/>
      <edge id="8888" label="Q9CQZ5 (pp) Q62425" source="8175" target="8514" cy:directed="1"/>
      <edge id="8887" label="Q9CQZ5 (pp) Q9CQQ7" source="8175" target="8378" cy:directed="1"/>
      <edge id="8886" label="Q9CQZ5 (pp) Q3UIU2" source="8175" target="8257" cy:directed="1"/>
      <edge id="8885" label="Q9CQZ5 (pp) Q9CQC7" source="8175" target="8463" cy:directed="1"/>
      <edge id="8884" label="Q9CQZ5 (pp) Q9CPQ8" source="8175" target="8233" cy:directed="1"/>
      <edge id="8883" label="Q9CQZ5 (pp) P99029" source="8175" target="8325" cy:directed="1"/>
      <edge id="8882" label="Q9CQZ5 (pp) Q99LC5" source="8175" target="8284" cy:directed="1"/>
      <edge id="8881" label="Q9CQZ5 (pp) Q9CQ69" source="8175" target="8203" cy:directed="1"/>
      <edge id="8880" label="Q9CQZ5 (pp) Q91YT0" source="8175" target="8348" cy:directed="1"/>
      <edge id="8879" label="Q9CQZ5 (pp) P97450" source="8175" target="8399" cy:directed="1"/>
      <edge id="8878" label="Q9CQZ5 (pp) O09111" source="8175" target="8180" cy:directed="1"/>
      <edge id="8877" label="Q9CQZ5 (pp) P19536" source="8175" target="8342" cy:directed="1"/>
      <edge id="8876" label="Q9CQZ5 (pp) Q9CQZ6" source="8175" target="8200" cy:directed="1"/>
      <edge id="8875" label="Q9CQZ5 (pp) Q9CPP6" source="8175" target="8250" cy:directed="1"/>
      <edge id="8874" label="Q9CQZ5 (pp) Q91VD9" source="8175" target="8234" cy:directed="1"/>
      <edge id="8873" label="Q9CQZ5 (pp) Q91VR2" source="8175" target="8232" cy:directed="1"/>
      <edge id="8872" label="Q9CQZ5 (pp) P48771" source="8175" target="8272" cy:directed="1"/>
      <edge id="8871" label="Q9CQZ5 (pp) Q9D6J6" source="8175" target="8176" cy:directed="1"/>
      <edge id="8870" label="Q80Z38 (pp) P35438" source="8174" target="8184" cy:directed="1"/>
      <edge id="8869" label="Q80Z38 (pp) Q8BYM5" source="8174" target="8561" cy:directed="1"/>
      <edge id="8868" label="Q01097 (pp) P12382" source="8173" target="8183" cy:directed="1"/>
      <edge id="8867" label="Q01097 (pp) A2CG49" source="8173" target="8761" cy:directed="1"/>
      <edge id="8866" label="Q01097 (pp) P15116" source="8173" target="8475" cy:directed="1"/>
      <edge id="8865" label="Q01097 (pp) P57780" source="8173" target="8703" cy:directed="1"/>
      <edge id="8864" label="Q01097 (pp) P31324" source="8173" target="8468" cy:directed="1"/>
      <edge id="8863" label="Q01097 (pp) Q61879" source="8173" target="8447" cy:directed="1"/>
      <edge id="8862" label="Q01097 (pp) P68181" source="8173" target="8600" cy:directed="1"/>
      <edge id="8861" label="Q01097 (pp) O35129" source="8173" target="8380" cy:directed="1"/>
      <edge id="8860" label="Q01097 (pp) P35436" source="8173" target="8189" cy:directed="1"/>
      <edge id="8859" label="Q01097 (pp) P53994" source="8173" target="8762" cy:directed="1"/>
      <edge id="8858" label="Q01097 (pp) P46660" source="8173" target="8370" cy:directed="1"/>
      <edge id="8857" label="Q01097 (pp) P63330" source="8173" target="8198" cy:directed="1"/>
      <edge id="8856" label="Q01097 (pp) P39053" source="8173" target="8466" cy:directed="1"/>
      <edge id="8855" label="Q01097 (pp) Q9QXS6" source="8173" target="8508" cy:directed="1"/>
      <edge id="8854" label="Q01097 (pp) D3YVF0" source="8173" target="8759" cy:directed="1"/>
      <edge id="8853" label="Q01097 (pp) P30999" source="8173" target="8553" cy:directed="1"/>
      <edge id="8852" label="Q01097 (pp) P35438" source="8173" target="8184" cy:directed="1"/>
      <edge id="8851" label="Q01097 (pp) P62874" source="8173" target="8330" cy:directed="1"/>
      <edge id="8850" label="Q01097 (pp) P05202" source="8173" target="8185" cy:directed="1"/>
      <edge id="8849" label="Q01097 (pp) P13020" source="8173" target="8746" cy:directed="1"/>
      <edge id="8848" label="Q01097 (pp) P11627" source="8173" target="8530" cy:directed="1"/>
      <edge id="8847" label="Q01097 (pp) P08551" source="8173" target="8684" cy:directed="1"/>
      <edge id="8846" label="Q01097 (pp) Q9CVB6" source="8173" target="8462" cy:directed="1"/>
      <edge id="8845" label="Q01097 (pp) P43006" source="8173" target="8742" cy:directed="1"/>
      <edge id="8844" label="Q01097 (pp) P06837" source="8173" target="8476" cy:directed="1"/>
      <edge id="8843" label="Q01097 (pp) O88737" source="8173" target="8464" cy:directed="1"/>
      <edge id="8842" label="Q01097 (pp) P17751" source="8173" target="8266" cy:directed="1"/>
      <edge id="8841" label="Q01097 (pp) Q8BH59" source="8173" target="8734" cy:directed="1"/>
      <edge id="8840" label="Q01097 (pp) P63011" source="8173" target="8516" cy:directed="1"/>
      <edge id="8839" label="Q01097 (pp) F6SEU4" source="8173" target="8732" cy:directed="1"/>
      <edge id="8838" label="Q01097 (pp) P59999" source="8173" target="8461" cy:directed="1"/>
      <edge id="8837" label="Q01097 (pp) P63001" source="8173" target="8367" cy:directed="1"/>
      <edge id="8836" label="Q01097 (pp) P63328" source="8173" target="8584" cy:directed="1"/>
      <edge id="8835" label="Q01097 (pp) P46096" source="8173" target="8659" cy:directed="1"/>
      <edge id="8834" label="Q01097 (pp) Q9JM76" source="8173" target="8347" cy:directed="1"/>
      <edge id="8833" label="Q01097 (pp) Q923T9" source="8173" target="8431" cy:directed="1"/>
      <edge id="8832" label="Q01097 (pp) O08599" source="8173" target="8643" cy:directed="1"/>
      <edge id="8831" label="Q01097 (pp) P48962" source="8173" target="8667" cy:directed="1"/>
      <edge id="8830" label="Q01097 (pp) P62259" source="8173" target="8194" cy:directed="1"/>
      <edge id="8829" label="Q01097 (pp) Q61411" source="8173" target="8609" cy:directed="1"/>
      <edge id="8828" label="Q01097 (pp) P62204" source="8173" target="8548" cy:directed="1"/>
      <edge id="8827" label="Q01097 (pp) P08553" source="8173" target="8686" cy:directed="1"/>
      <edge id="8826" label="Q01097 (pp) P60710" source="8173" target="8311" cy:directed="1"/>
      <edge id="8825" label="Q01097 (pp) P61982" source="8173" target="8478" cy:directed="1"/>
      <edge id="8824" label="Q01097 (pp) P63321" source="8173" target="8670" cy:directed="1"/>
      <edge id="8823" label="Q01097 (pp) P35279" source="8173" target="8620" cy:directed="1"/>
      <edge id="8822" label="Q01097 (pp) Q91VR2" source="8173" target="8232" cy:directed="1"/>
      <edge id="8821" label="Q01097 (pp) O55100" source="8173" target="8651" cy:directed="1"/>
      <edge id="8820" label="Q01097 (pp) P68404" source="8173" target="8229" cy:directed="1"/>
      <edge id="8819" label="Q01097 (pp) P97772" source="8173" target="8470" cy:directed="1"/>
      <edge id="8818" label="Q01097 (pp) P63318" source="8173" target="8635" cy:directed="1"/>
      <edge id="8817" label="Q01097 (pp) P50516" source="8173" target="8262" cy:directed="1"/>
      <edge id="8816" label="Q01097 (pp) P05480" source="8173" target="8313" cy:directed="1"/>
      <edge id="8815" label="Q01097 (pp) O88952" source="8173" target="8213" cy:directed="1"/>
      <edge id="8814" label="Q01097 (pp) P60879" source="8173" target="8350" cy:directed="1"/>
      <edge id="8813" label="Q01097 (pp) P06151" source="8173" target="8207" cy:directed="1"/>
      <edge id="8812" label="Q01097 (pp) P16858" source="8173" target="8528" cy:directed="1"/>
      <edge id="8811" label="Q01097 (pp) P51863" source="8173" target="8192" cy:directed="1"/>
      <edge id="8810" label="Q01097 (pp) P16054" source="8173" target="8412" cy:directed="1"/>
      <edge id="8809" label="Q01097 (pp) P31938" source="8173" target="8258" cy:directed="1"/>
      <edge id="8808" label="Q01097 (pp) P20357" source="8173" target="8589" cy:directed="1"/>
      <edge id="8807" label="Q01097 (pp) P05063" source="8173" target="8481" cy:directed="1"/>
      <edge id="8806" label="Q01097 (pp) P47757" source="8173" target="8195" cy:directed="1"/>
      <edge id="8805" label="Q01097 (pp) P68369" source="8173" target="8317" cy:directed="1"/>
      <edge id="8804" label="Q01097 (pp) P68033" source="8173" target="8540" cy:directed="1"/>
      <edge id="8803" label="Q01097 (pp) P17426" source="8173" target="8260" cy:directed="1"/>
      <edge id="8802" label="Q01097 (pp) P63101" source="8173" target="8448" cy:directed="1"/>
      <edge id="8801" label="Q01097 (pp) Q9D6M3" source="8173" target="8499" cy:directed="1"/>
      <edge id="8800" label="Q01097 (pp) Q6PHZ2" source="8173" target="8310" cy:directed="1"/>
      <edge id="8799" label="Q01097 (pp) P62835" source="8173" target="8494" cy:directed="1"/>
      <edge id="8798" label="Q01097 (pp) Q03265" source="8173" target="8181" cy:directed="1"/>
      <edge id="8797" label="Q01097 (pp) P47754" source="8173" target="8406" cy:directed="1"/>
      <edge id="8796" label="Q01097 (pp) P63085" source="8173" target="8224" cy:directed="1"/>
      <edge id="8795" label="Q01097 (pp) P12367" source="8173" target="8386" cy:directed="1"/>
      <edge id="8794" label="Q01097 (pp) Q60676" source="8173" target="8364" cy:directed="1"/>
      <edge id="8793" label="Q01097 (pp) P68510" source="8173" target="8182" cy:directed="1"/>
      <edge id="8792" label="Q01097 (pp) P51881" source="8173" target="8314" cy:directed="1"/>
      <edge id="8791" label="Q01097 (pp) O35526" source="8173" target="8298" cy:directed="1"/>
      <edge id="8790" label="Q01097 (pp) P15105" source="8173" target="8251" cy:directed="1"/>
      <edge id="8789" label="Q01097 (pp) P05132" source="8173" target="8238" cy:directed="1"/>
      <edge id="8788" label="Q01097 (pp) Q80Z38" source="8173" target="8174" cy:directed="1"/>
    </graph>
  </att>
</graph>
