# Supplementary material for: APP Is a Context-Sensitive Regulator of the Hippocampal Presynaptic Active Zone
Source: PLOS journal article supplement (doi:10.1371/journal.pcbi.1004832), 2016-04-19
Supplement: S6 (10.1371/journal.pcbi.1004832.s006) [file journal.pcbi.1004832.s006.cys › CytoscapeSession-2016_01_22-10_07/networks/12178-Core+Network+Localization.xgmml]

<?xml version="1.0" encoding="UTF-8" standalone="yes"?>
<graph id="12178" label="Core Network Localization" cy:view="0" cy:registered="0" cy:documentVersion="3.0" xmlns:dc="http://purl.org/dc/elements/1.1/" xmlns:xlink="http://www.w3.org/1999/xlink" xmlns:rdf="http://www.w3.org/1999/02/22-rdf-syntax-ns#" xmlns:cy="http://www.cytoscape.org" xmlns="http://www.cs.rpi.edu/XGMML">
  <att>
    <graph id="12194" label="Localization" cy:registered="1">
      <node id="12818" label="Q00493"/>
      <node id="12817" label="Q9R1V4"/>
      <node id="12816" label="Q9R0P5"/>
      <node id="12815" label="O88342"/>
      <node id="12814" label="Q9DB73"/>
      <node id="12813" label="O54774"/>
      <node id="12812" label="Q8VHW2"/>
      <node id="12811" label="P58771"/>
      <node id="12810" label="Q03137"/>
      <node id="12809" label="Q9QYX7"/>
      <node id="12808" label="P23927"/>
      <node id="12807" label="Q9EQZ6"/>
      <node id="12806" label="P35802"/>
      <node id="12805" label="P80560"/>
      <node id="12804" label="Q60737"/>
      <node id="12803" label="Q9CR95"/>
      <node id="12802" label="Q4KMM3"/>
      <node id="12801" label="Q9Z0E0"/>
      <node id="12800" label="Q812A2"/>
      <node id="12799" label="Q9QZF2"/>
      <node id="12798" label="Q91ZZ3"/>
      <node id="12797" label="Q8K400"/>
      <node id="12796" label="Q91WS0"/>
      <node id="12795" label="Q9JIA1"/>
      <node id="12794" label="O89053"/>
      <node id="12793" label="P53994"/>
      <node id="12792" label="A2CG49"/>
      <node id="12791" label="Q810U4"/>
      <node id="12790" label="D3YVF0"/>
      <node id="12789" label="Q9ES97"/>
      <node id="12788" label="Q9R1V7"/>
      <node id="12787" label="Q6URW6"/>
      <node id="12786" label="Q9D6K5"/>
      <node id="12785" label="Q99KB8"/>
      <node id="12784" label="Q9CYT6"/>
      <node id="12783" label="Q9D8Y0"/>
      <node id="12782" label="Q9Z0P4"/>
      <node id="12781" label="Q04447"/>
      <node id="12780" label="Q9Z2W9"/>
      <node id="12779" label="Q63810"/>
      <node id="12778" label="Q61330"/>
      <node id="12777" label="P13020"/>
      <node id="12776" label="Q8K0T0"/>
      <node id="12775" label="Q9CWS0"/>
      <node id="12774" label="Q80XN0"/>
      <node id="12773" label="P43006"/>
      <node id="12772" label="Q9ERD7"/>
      <node id="12771" label="Q921J2"/>
      <node id="12770" label="Q9CQW1"/>
      <node id="12769" label="Q6P9K9"/>
      <node id="12768" label="Q9CZW5"/>
      <node id="12767" label="P20152"/>
      <node id="12766" label="Q8BRT1"/>
      <node id="12765" label="Q8BH59"/>
      <node id="12764" label="Q921M7"/>
      <node id="12763" label="F6SEU4"/>
      <node id="12762" label="Q8R366"/>
      <node id="12761" label="Q9QYA2"/>
      <node id="12760" label="Q61206"/>
      <node id="12759" label="Q3ULJ0"/>
      <node id="12758" label="Q8CGK3"/>
      <node id="12757" label="Q03157"/>
      <node id="12756" label="Q8R5C5"/>
      <node id="12755" label="Q78IK2"/>
      <node id="12754" label="Q91VT4"/>
      <node id="12753" label="Q61151"/>
      <node id="12752" label="Q3THE2"/>
      <node id="12751" label="Q920P5"/>
      <node id="12750" label="Q2PFD7"/>
      <node id="12749" label="Q7TMM9"/>
      <node id="12748" label="Q68FH0"/>
      <node id="12747" label="Q91VR7"/>
      <node id="12746" label="Q9CR62"/>
      <node id="12745" label="Q8CHH9"/>
      <node id="12744" label="P97300"/>
      <node id="12743" label="Q60634"/>
      <node id="12742" label="O08917"/>
      <node id="12741" label="Q61316"/>
      <node id="12740" label="Q9D1T0"/>
      <node id="12739" label="P48036"/>
      <node id="12738" label="P11798"/>
      <node id="12737" label="Q8K183"/>
      <node id="12736" label="Q99NE5"/>
      <node id="12735" label="Q9CR16"/>
      <node id="12734" label="P57780"/>
      <node id="12733" label="Q9QY76"/>
      <node id="12732" label="P23242"/>
      <node id="12731" label="Q9R1V6"/>
      <node id="12730" label="P48758"/>
      <node id="12729" label="Q91XV3"/>
      <node id="12728" label="P55302"/>
      <node id="12727" label="Q8BIJ6"/>
      <node id="12726" label="O88643"/>
      <node id="12725" label="Q80TZ3"/>
      <node id="12724" label="Q7TMB8"/>
      <node id="12723" label="Q9WV55"/>
      <node id="12722" label="O55131"/>
      <node id="12721" label="O35136"/>
      <node id="12720" label="Q7TSJ2"/>
      <node id="12719" label="P12960"/>
      <node id="12718" label="Q61699"/>
      <node id="12717" label="P08553"/>
      <node id="12716" label="Q8K4Z3"/>
      <node id="12715" label="P08551"/>
      <node id="12714" label="Q8VDQ8"/>
      <node id="12713" label="O54983"/>
      <node id="12712" label="P40124"/>
      <node id="12711" label="P18760"/>
      <node id="12710" label="Q9Z2I0"/>
      <node id="12709" label="Q9Z2Q6"/>
      <node id="12708" label="Q9WV34"/>
      <node id="12707" label="P42208"/>
      <node id="12706" label="P28661"/>
      <node id="12705" label="P26645"/>
      <node id="12704" label="P84096"/>
      <node id="12703" label="O35143"/>
      <node id="12702" label="P48722"/>
      <node id="12701" label="P63321"/>
      <node id="12700" label="Q8K021"/>
      <node id="12699" label="Q8CI94"/>
      <node id="12698" label="P48962"/>
      <node id="12697" label="Q71LX4"/>
      <node id="12696" label="P43406"/>
      <node id="12695" label="Q9D880"/>
      <node id="12694" label="O35857"/>
      <node id="12693" label="Q9CWZ7"/>
      <node id="12692" label="P28740"/>
      <node id="12691" label="Q922H2"/>
      <node id="12690" label="P46096"/>
      <node id="12689" label="Q61490"/>
      <node id="12688" label="Q9CZ42"/>
      <node id="12687" label="P35564"/>
      <node id="12686" label="P19096"/>
      <node id="12685" label="Q61644"/>
      <node id="12684" label="Q8BZ98"/>
      <node id="12683" label="Q5RJI5"/>
      <node id="12682" label="O55100"/>
      <node id="12681" label="P61164"/>
      <node id="12680" label="Q8R191"/>
      <node id="12679" label="O35643"/>
      <node id="12678" label="Q99P72"/>
      <node id="12677" label="Q60930"/>
      <node id="12676" label="P20444"/>
      <node id="12675" label="Q9QXS1"/>
      <node id="12674" label="O08599"/>
      <node id="12673" label="Q8BW75"/>
      <node id="12672" label="O35239"/>
      <node id="12671" label="Q5DQR4"/>
      <node id="12670" label="Q9EPJ9"/>
      <node id="12669" label="P00405"/>
      <node id="12668" label="P56564"/>
      <node id="12667" label="P70296"/>
      <node id="12666" label="P63318"/>
      <node id="12665" label="P27546"/>
      <node id="12664" label="P58281"/>
      <node id="12663" label="Q8R3V5"/>
      <node id="12662" label="P67871"/>
      <node id="12661" label="Q810U3"/>
      <node id="12660" label="Q61553"/>
      <node id="12659" label="Q80U28"/>
      <node id="12658" label="P19246"/>
      <node id="12657" label="P62743"/>
      <node id="12656" label="P22723"/>
      <node id="12655" label="Q60605"/>
      <node id="12654" label="P47708"/>
      <node id="12653" label="Q8VBV7"/>
      <node id="12652" label="Q9DC28"/>
      <node id="12651" label="P35279"/>
      <node id="12650" label="Q9CRB9"/>
      <node id="12649" label="Q9CQI6"/>
      <node id="12648" label="P62821"/>
      <node id="12647" label="P50396"/>
      <node id="12646" label="Q9WU78"/>
      <node id="12645" label="P0C0A3"/>
      <node id="12644" label="Q9R0P9"/>
      <node id="12643" label="Q80UU9"/>
      <node id="12642" label="O55023"/>
      <node id="12641" label="Q60875"/>
      <node id="12640" label="Q61411"/>
      <node id="12639" label="Q8CHC4"/>
      <node id="12638" label="Q91VZ6"/>
      <node id="12637" label="Q9WUB3"/>
      <node id="12636" label="Q62465"/>
      <node id="12635" label="Q9D0F9"/>
      <node id="12634" label="Q9R111"/>
      <node id="12633" label="Q6PIC6"/>
      <node id="12632" label="Q80VP1"/>
      <node id="12631" label="P68181"/>
      <node id="12630" label="P28663"/>
      <node id="12629" label="Q6P1F6"/>
      <node id="12628" label="P41216"/>
      <node id="12627" label="Q9D6F9"/>
      <node id="12626" label="Q99PJ0"/>
      <node id="12625" label="Q99MR8"/>
      <node id="12624" label="Q8BH04"/>
      <node id="12623" label="Q8BWF0"/>
      <node id="12622" label="Q91WC3"/>
      <node id="12621" label="Q3UVX5"/>
      <node id="12620" label="P20357"/>
      <node id="12619" label="P01831"/>
      <node id="12618" label="Q9D8B3"/>
      <node id="12617" label="P28667"/>
      <node id="12616" label="O55042"/>
      <node id="12615" label="P63328"/>
      <node id="12614" label="Q91ZJ5"/>
      <node id="12613" label="P60469"/>
      <node id="12612" label="Q62419"/>
      <node id="12611" label="P45376"/>
      <node id="12610" label="O54991"/>
      <node id="12609" label="B9EKR1"/>
      <node id="12608" label="Q9QYR6"/>
      <node id="12607" label="O08585"/>
      <node id="12606" label="Q60932"/>
      <node id="12605" label="Q3UHL1"/>
      <node id="12604" label="Q9CPQ1"/>
      <node id="12603" label="Q5SQX6"/>
      <node id="12602" label="Q80Y14"/>
      <node id="12601" label="Q9Z0R4"/>
      <node id="12600" label="P00493"/>
      <node id="12599" label="P60761"/>
      <node id="12598" label="Q64332"/>
      <node id="12597" label="O70318"/>
      <node id="12596" label="O08539"/>
      <node id="12595" label="Q9CS84"/>
      <node id="12594" label="P40630"/>
      <node id="12593" label="Q9JIS5"/>
      <node id="12592" label="Q8BYM5"/>
      <node id="12591" label="Q4ACU6"/>
      <node id="12590" label="P48453"/>
      <node id="12589" label="Q925I1"/>
      <node id="12588" label="Q62261"/>
      <node id="12587" label="Q9R0N7"/>
      <node id="12586" label="Q60996"/>
      <node id="12585" label="P62482"/>
      <node id="12584" label="P30999"/>
      <node id="12583" label="Q68FF6"/>
      <node id="12582" label="P23818"/>
      <node id="12581" label="Q9DBJ1"/>
      <node id="12580" label="P68254"/>
      <node id="12579" label="P62204"/>
      <node id="12578" label="P17156"/>
      <node id="12577" label="Q99K85"/>
      <node id="12576" label="P28652"/>
      <node id="12575" label="P70414"/>
      <node id="12574" label="Q6PIE5"/>
      <node id="12573" label="P47802"/>
      <node id="12572" label="Q9R0Y5"/>
      <node id="12571" label="P68033"/>
      <node id="12570" label="Q9QXJ1"/>
      <node id="12569" label="P84091"/>
      <node id="12568" label="Q9Z218"/>
      <node id="12567" label="P99024"/>
      <node id="12566" label="P03995"/>
      <node id="12565" label="P16330"/>
      <node id="12564" label="O70589"/>
      <node id="12563" label="Q8BKX1"/>
      <node id="12562" label="P13595"/>
      <node id="12561" label="P11627"/>
      <node id="12560" label="P62746"/>
      <node id="12559" label="P16858"/>
      <node id="12558" label="Q8VD37"/>
      <node id="12557" label="Q8QZT1"/>
      <node id="12556" label="Q60931"/>
      <node id="12555" label="P17665"/>
      <node id="12554" label="Q9JLZ3"/>
      <node id="12553" label="Q8CAQ8"/>
      <node id="12552" label="Q99L43"/>
      <node id="12551" label="Q8VDP6"/>
      <node id="12550" label="Q9Z0X1"/>
      <node id="12549" label="P61161"/>
      <node id="12548" label="Q60598"/>
      <node id="12547" label="P63011"/>
      <node id="12546" label="P38647"/>
      <node id="12545" label="Q62425"/>
      <node id="12544" label="Q8BMF3"/>
      <node id="12543" label="Q9Z1J3"/>
      <node id="12542" label="Q9DCB8"/>
      <node id="12541" label="O88712"/>
      <node id="12540" label="Q8BHL5"/>
      <node id="12539" label="Q9QXS6"/>
      <node id="12538" label="P17183"/>
      <node id="12537" label="Q6IRU5"/>
      <node id="12536" label="Q9DBG3"/>
      <node id="12535" label="P55088"/>
      <node id="12534" label="P10637"/>
      <node id="12533" label="Q922R8"/>
      <node id="12532" label="P68368"/>
      <node id="12531" label="P47857"/>
      <node id="12530" label="Q9D6M3"/>
      <node id="12529" label="Q62048"/>
      <node id="12528" label="Q99104"/>
      <node id="12527" label="P60766"/>
      <node id="12526" label="Q6R891"/>
      <node id="12525" label="P62835"/>
      <node id="12524" label="Q8BLK3"/>
      <node id="12523" label="Q91ZX7"/>
      <node id="12522" label="P08226"/>
      <node id="12521" label="Q8R0S4"/>
      <node id="12520" label="Q61290"/>
      <node id="12519" label="P42125"/>
      <node id="12518" label="Q8BGD5"/>
      <node id="12517" label="Q9Z268"/>
      <node id="12516" label="Q8BMS1"/>
      <node id="12515" label="P17182"/>
      <node id="12514" label="Q9CPW4"/>
      <node id="12513" label="Q8BKZ9"/>
      <node id="12512" label="P05063"/>
      <node id="12511" label="Q60597"/>
      <node id="12510" label="Q9WUA3"/>
      <node id="12509" label="P61982"/>
      <node id="12508" label="P07901"/>
      <node id="12507" label="P06837"/>
      <node id="12506" label="P15116"/>
      <node id="12505" label="Q7TQF7"/>
      <node id="12504" label="Q99L47"/>
      <node id="12503" label="P29758"/>
      <node id="12502" label="Q8CHT0"/>
      <node id="12501" label="P97772"/>
      <node id="12500" label="Q8BR92"/>
      <node id="12499" label="P31324"/>
      <node id="12498" label="Q6PB66"/>
      <node id="12497" label="P39053"/>
      <node id="12496" label="Q6PH08"/>
      <node id="12495" label="O88737"/>
      <node id="12494" label="Q9CQC7"/>
      <node id="12493" label="Q9CVB6"/>
      <node id="12492" label="P59999"/>
      <node id="12491" label="Q8CHU3"/>
      <node id="12490" label="Q5FWK3"/>
      <node id="12489" label="Q9WTT4"/>
      <node id="12488" label="Q00612"/>
      <node id="12487" label="Q9D6J5"/>
      <node id="12486" label="P23506"/>
      <node id="12485" label="Q6PCP5"/>
      <node id="12484" label="Q8VDN2"/>
      <node id="12483" label="Q64516"/>
      <node id="12482" label="Q9DBF1"/>
      <node id="12481" label="Q8R001"/>
      <node id="12480" label="Q9QWI6"/>
      <node id="12479" label="P63101"/>
      <node id="12478" label="Q61879"/>
      <node id="12477" label="Q91ZA3"/>
      <node id="12476" label="Q3UMR5"/>
      <node id="12475" label="P56382"/>
      <node id="12474" label="P09103"/>
      <node id="12473" label="P14873"/>
      <node id="12472" label="P43024"/>
      <node id="12471" label="Q62420"/>
      <node id="12470" label="Q9EP69"/>
      <node id="12469" label="P26040"/>
      <node id="12468" label="P70441"/>
      <node id="12467" label="P61264"/>
      <node id="12466" label="Q7TPR4"/>
      <node id="12465" label="Q3UTJ2"/>
      <node id="12464" label="P06745"/>
      <node id="12463" label="Q920I9"/>
      <node id="12462" label="Q923T9"/>
      <node id="12461" label="P63040"/>
      <node id="12460" label="Q61831"/>
      <node id="12459" label="P50544"/>
      <node id="12458" label="Q9Z2I9"/>
      <node id="12457" label="Q61301"/>
      <node id="12456" label="Q9DB05"/>
      <node id="12455" label="P52480"/>
      <node id="12454" label="Q93092"/>
      <node id="12453" label="Q9JHI5"/>
      <node id="12452" label="P53395"/>
      <node id="12451" label="Q9DBL1"/>
      <node id="12450" label="Q8K1M6"/>
      <node id="12449" label="Q9CQ92"/>
      <node id="12448" label="P63082"/>
      <node id="12447" label="Q8BPN8"/>
      <node id="12446" label="O35465"/>
      <node id="12445" label="P18572"/>
      <node id="12444" label="P09671"/>
      <node id="12443" label="P16054"/>
      <node id="12442" label="P62962"/>
      <node id="12441" label="Q61102"/>
      <node id="12440" label="P22315"/>
      <node id="12439" label="P35486"/>
      <node id="12438" label="Q9CZT8"/>
      <node id="12437" label="P47754"/>
      <node id="12436" label="P14094"/>
      <node id="12435" label="Q99JY9"/>
      <node id="12434" label="Q99MN9"/>
      <node id="12433" label="Q99PT1"/>
      <node id="12432" label="P62823"/>
      <node id="12431" label="O88935"/>
      <node id="12430" label="P97450"/>
      <node id="12429" label="Q64010"/>
      <node id="12428" label="Q9JLM8"/>
      <node id="12427" label="P20108"/>
      <node id="12426" label="Q9QUH0"/>
      <node id="12425" label="Q64521"/>
      <node id="12424" label="P13707"/>
      <node id="12423" label="Q9R0K7"/>
      <node id="12422" label="Q80T41"/>
      <node id="12421" label="Q9D898"/>
      <node id="12420" label="P63017"/>
      <node id="12419" label="P45878"/>
      <node id="12418" label="Q61548"/>
      <node id="12417" label="P12367"/>
      <node id="12416" label="Q9D023"/>
      <node id="12415" label="P56379"/>
      <node id="12414" label="P18052"/>
      <node id="12413" label="P70232"/>
      <node id="12412" label="Q9CZS1"/>
      <node id="12411" label="O35129"/>
      <node id="12410" label="O88696"/>
      <node id="12409" label="Q9CQQ7"/>
      <node id="12408" label="Q9JJV2"/>
      <node id="12407" label="Q9DC69"/>
      <node id="12406" label="Q91VM9"/>
      <node id="12405" label="Q9DB77"/>
      <node id="12404" label="Q8K3J1"/>
      <node id="12403" label="Q9D855"/>
      <node id="12402" label="Q9JHU4"/>
      <node id="12401" label="P46660"/>
      <node id="12400" label="P63044"/>
      <node id="12399" label="Q62351"/>
      <node id="12398" label="P63001"/>
      <node id="12397" label="Q8BG51"/>
      <node id="12396" label="Q9CXZ1"/>
      <node id="12395" label="Q60676"/>
      <node id="12394" label="Q8JZN5"/>
      <node id="12393" label="Q8JZQ2"/>
      <node id="12392" label="P51174"/>
      <node id="12391" label="Q8VDD5"/>
      <node id="12390" label="P18872"/>
      <node id="12389" label="Q9CQ75"/>
      <node id="12388" label="P03930"/>
      <node id="12387" label="P49615"/>
      <node id="12386" label="P39688"/>
      <node id="12385" label="P04925"/>
      <node id="12384" label="Q99JY0"/>
      <node id="12383" label="O08756"/>
      <node id="12382" label="P28660"/>
      <node id="12381" label="P60879"/>
      <node id="12380" label="Q9DCJ5"/>
      <node id="12379" label="Q91YT0"/>
      <node id="12378" label="Q9JM76"/>
      <node id="12377" label="Q9R0Q6"/>
      <node id="12376" label="Q68FD5"/>
      <node id="12375" label="Q9QYJ0"/>
      <node id="12374" label="Q60864"/>
      <node id="12373" label="P19536"/>
      <node id="12372" label="Q99N28"/>
      <node id="12371" label="Q9JLB0"/>
      <node id="12370" label="Q8BVE3"/>
      <node id="12369" label="P50518"/>
      <node id="12368" label="P97797"/>
      <node id="12367" label="Q61735"/>
      <node id="12366" label="Q9DCX2"/>
      <node id="12365" label="Q7TMF3"/>
      <node id="12364" label="O35658"/>
      <node id="12363" label="Q99KR7"/>
      <node id="12362" label="Q9EQ20"/>
      <node id="12361" label="P62874"/>
      <node id="12360" label="P63213"/>
      <node id="12359" label="P40142"/>
      <node id="12358" label="Q9CQR4"/>
      <node id="12357" label="Q9CQV8"/>
      <node id="12356" label="P99029"/>
      <node id="12355" label="P62073"/>
      <node id="12354" label="Q62277"/>
      <node id="12353" label="Q60631"/>
      <node id="12352" label="P52503"/>
      <node id="12351" label="Q8R4N0"/>
      <node id="12350" label="Q3ULD5"/>
      <node id="12349" label="Q8VEM8"/>
      <node id="12348" label="P68369"/>
      <node id="12347" label="Q8K2B3"/>
      <node id="12346" label="Q91WD5"/>
      <node id="12345" label="P51881"/>
      <node id="12344" label="P05480"/>
      <node id="12343" label="Q02248"/>
      <node id="12342" label="P60710"/>
      <node id="12341" label="Q6PHZ2"/>
      <node id="12340" label="P97807"/>
      <node id="12339" label="Q9ERS2"/>
      <node id="12338" label="Q99KI0"/>
      <node id="12337" label="O08788"/>
      <node id="12336" label="Q99KJ8"/>
      <node id="12335" label="Q91Z53"/>
      <node id="12334" label="P26443"/>
      <node id="12333" label="Q62442"/>
      <node id="12332" label="Q9D172"/>
      <node id="12331" label="P56391"/>
      <node id="12330" label="Q9WV18"/>
      <node id="12329" label="O35526"/>
      <node id="12328" label="Q8R5M8"/>
      <node id="12327" label="Q9WV92"/>
      <node id="12326" label="P62814"/>
      <node id="12325" label="P12023"/>
      <node id="12324" label="P61922"/>
      <node id="12323" label="P48320"/>
      <node id="12322" label="P17710"/>
      <node id="12321" label="P05064"/>
      <node id="12320" label="P11499"/>
      <node id="12319" label="Q8K1Z0"/>
      <node id="12318" label="P62331"/>
      <node id="12317" label="Q99LX0"/>
      <node id="12316" label="Q8BGH2"/>
      <node id="12315" label="Q99LC5"/>
      <node id="12314" label="Q61425"/>
      <node id="12313" label="P12787"/>
      <node id="12312" label="Q9CQA3"/>
      <node id="12311" label="Q8BWT1"/>
      <node id="12310" label="Q921G7"/>
      <node id="12309" label="Q9Z1B3"/>
      <node id="12308" label="O70161"/>
      <node id="12307" label="Q6PER3"/>
      <node id="12306" label="P63005"/>
      <node id="12305" label="P47738"/>
      <node id="12304" label="Q64133"/>
      <node id="12303" label="P48771"/>
      <node id="12302" label="O70325"/>
      <node id="12301" label="P62812"/>
      <node id="12300" label="P63137"/>
      <node id="12299" label="Q9Z1P6"/>
      <node id="12298" label="P09411"/>
      <node id="12297" label="P17751"/>
      <node id="12296" label="Q7TQI3"/>
      <node id="12295" label="O88441"/>
      <node id="12294" label="P70404"/>
      <node id="12293" label="P50516"/>
      <node id="12292" label="P57746"/>
      <node id="12291" label="P17426"/>
      <node id="12290" label="P17427"/>
      <node id="12289" label="P31938"/>
      <node id="12288" label="Q3UIU2"/>
      <node id="12287" label="Q9D2G2"/>
      <node id="12286" label="P62897"/>
      <node id="12285" label="Q9CQ62"/>
      <node id="12284" label="Q08331"/>
      <node id="12283" label="P46460"/>
      <node id="12282" label="P15105"/>
      <node id="12281" label="Q9CPP6"/>
      <node id="12280" label="Q9DCW4"/>
      <node id="12279" label="P63037"/>
      <node id="12278" label="Q9CQN1"/>
      <node id="12277" label="Q9D0K2"/>
      <node id="12276" label="Q9WUM5"/>
      <node id="12275" label="Q9Z1G4"/>
      <node id="12274" label="Q9D1K2"/>
      <node id="12273" label="Q9D0S9"/>
      <node id="12272" label="Q9DC70"/>
      <node id="12271" label="Q06185"/>
      <node id="12270" label="Q9CQJ8"/>
      <node id="12269" label="P05132"/>
      <node id="12268" label="P52196"/>
      <node id="12267" label="Q9CR68"/>
      <node id="12266" label="Q9DCS9"/>
      <node id="12265" label="Q91VD9"/>
      <node id="12264" label="Q9CPQ8"/>
      <node id="12263" label="Q91VR2"/>
      <node id="12262" label="Q9JLJ2"/>
      <node id="12261" label="P67778"/>
      <node id="12260" label="P68404"/>
      <node id="12259" label="P17742"/>
      <node id="12258" label="P56480"/>
      <node id="12257" label="Q61598"/>
      <node id="12256" label="P61027"/>
      <node id="12255" label="P63085"/>
      <node id="12254" label="Q05920"/>
      <node id="12253" label="Q8BMF4"/>
      <node id="12252" label="Q99LY9"/>
      <node id="12251" label="Q99LC3"/>
      <node id="12250" label="Q9D0M3"/>
      <node id="12249" label="Q9CZ13"/>
      <node id="12248" label="Q8BH95"/>
      <node id="12247" label="P63038"/>
      <node id="12246" label="Q8BK64"/>
      <node id="12245" label="P19783"/>
      <node id="12244" label="O88952"/>
      <node id="12243" label="Q6P9K8"/>
      <node id="12242" label="Q9Z2H5"/>
      <node id="12241" label="Q3UHD9"/>
      <node id="12240" label="Q9CQH3"/>
      <node id="12239" label="Q9DB20"/>
      <node id="12238" label="P06151"/>
      <node id="12237" label="P54071"/>
      <node id="12236" label="Q9D6R2"/>
      <node id="12235" label="P08249"/>
      <node id="12234" label="Q9CQ69"/>
      <node id="12233" label="Q9DCT2"/>
      <node id="12232" label="Q9CQ54"/>
      <node id="12231" label="Q9CQZ6"/>
      <node id="12230" label="Q76MZ3"/>
      <node id="12229" label="P63330"/>
      <node id="12228" label="P16546"/>
      <node id="12227" label="Q8C8R3"/>
      <node id="12226" label="P47757"/>
      <node id="12225" label="P62259"/>
      <node id="12224" label="Q9Z1G3"/>
      <node id="12223" label="P51863"/>
      <node id="12222" label="Q9DCD0"/>
      <node id="12221" label="Q9CZU6"/>
      <node id="12220" label="P35436"/>
      <node id="12219" label="P23819"/>
      <node id="12218" label="Q06335"/>
      <node id="12217" label="Q9QUI0"/>
      <node id="12216" label="P05202"/>
      <node id="12215" label="P35438"/>
      <node id="12214" label="P12382"/>
      <node id="12213" label="P68510"/>
      <node id="12212" label="Q03265"/>
      <node id="12211" label="O09111"/>
      <node id="12210" label="Q9D3D9"/>
      <node id="12209" label="Q9D051"/>
      <node id="12208" label="O08749"/>
      <node id="12207" label="Q9D6J6"/>
      <node id="12206" label="Q9CQZ5"/>
      <node id="12205" label="Q80Z38"/>
      <node id="12204" label="Q01097"/>
      <edge id="16208" label="Q00493 (pp) P12023" source="12818" target="12325" cy:directed="1"/>
      <edge id="16207" label="Q9R1V4 (pp) Q9JIA1" source="12817" target="12795" cy:directed="1"/>
      <edge id="16206" label="O88342 (pp) P18760" source="12815" target="12711" cy:directed="1"/>
      <edge id="16205" label="O88342 (pp) P47757" source="12815" target="12226" cy:directed="1"/>
      <edge id="16204" label="O88342 (pp) Q9CVB6" source="12815" target="12493" cy:directed="1"/>
      <edge id="16203" label="Q9DB73 (pp) Q91VR2" source="12814" target="12263" cy:directed="1"/>
      <edge id="16202" label="O54774 (pp) Q68FD5" source="12813" target="12376" cy:directed="1"/>
      <edge id="16201" label="Q8VHW2 (pp) P23819" source="12812" target="12219" cy:directed="1"/>
      <edge id="16200" label="P58771 (pp) P16054" source="12811" target="12443" cy:directed="1"/>
      <edge id="16199" label="Q03137 (pp) P39688" source="12810" target="12386" cy:directed="1"/>
      <edge id="16198" label="Q9QYX7 (pp) Q9EQZ6" source="12809" target="12807" cy:directed="1"/>
      <edge id="16197" label="P23927 (pp) P16054" source="12808" target="12443" cy:directed="1"/>
      <edge id="16196" label="P80560 (pp) P18052" source="12805" target="12414" cy:directed="1"/>
      <edge id="16195" label="Q9CR95 (pp) P17427" source="12803" target="12290" cy:directed="1"/>
      <edge id="16194" label="Q4KMM3 (pp) P50516" source="12802" target="12293" cy:directed="1"/>
      <edge id="16193" label="Q9QZF2 (pp) P12023" source="12799" target="12325" cy:directed="1"/>
      <edge id="16192" label="Q91WS0 (pp) Q9CQH3" source="12796" target="12240" cy:directed="1"/>
      <edge id="16191" label="Q9JIA1 (pp) Q01097" source="12795" target="12204" cy:directed="1"/>
      <edge id="16190" label="P53994 (pp) Q61598" source="12793" target="12257" cy:directed="1"/>
      <edge id="16189" label="D3YVF0 (pp) P48453" source="12790" target="12590" cy:directed="1"/>
      <edge id="16188" label="D3YVF0 (pp) P35438" source="12790" target="12215" cy:directed="1"/>
      <edge id="16187" label="Q9ES97 (pp) Q99P72" source="12789" target="12678" cy:directed="1"/>
      <edge id="16186" label="Q9ES97 (pp) Q8K0T0" source="12789" target="12776" cy:directed="1"/>
      <edge id="16185" label="Q9R1V7 (pp) Q9JIA1" source="12788" target="12795" cy:directed="1"/>
      <edge id="16184" label="Q9R1V7 (pp) P04925" source="12788" target="12385" cy:directed="1"/>
      <edge id="16183" label="Q9D6K5 (pp) Q8CHC4" source="12786" target="12639" cy:directed="1"/>
      <edge id="16182" label="Q9CYT6 (pp) P40124" source="12784" target="12712" cy:directed="1"/>
      <edge id="16181" label="Q04447 (pp) P63017" source="12781" target="12420" cy:directed="1"/>
      <edge id="16180" label="Q9Z2W9 (pp) P23819" source="12780" target="12219" cy:directed="1"/>
      <edge id="16179" label="Q63810 (pp) P48453" source="12779" target="12590" cy:directed="1"/>
      <edge id="16178" label="Q61330 (pp) B9EKR1" source="12778" target="12609" cy:directed="1"/>
      <edge id="16177" label="Q8K0T0 (pp) P50516" source="12776" target="12293" cy:directed="1"/>
      <edge id="16176" label="Q8K0T0 (pp) Q01097" source="12776" target="12204" cy:directed="1"/>
      <edge id="16175" label="Q9ERD7 (pp) P47757" source="12772" target="12226" cy:directed="1"/>
      <edge id="16174" label="Q921J2 (pp) P63101" source="12771" target="12479" cy:directed="1"/>
      <edge id="16173" label="Q9CQW1 (pp) P46460" source="12770" target="12283" cy:directed="1"/>
      <edge id="16172" label="Q6P9K9 (pp) Q8BYM5" source="12769" target="12592" cy:directed="1"/>
      <edge id="16171" label="Q6P9K9 (pp) O70589" source="12769" target="12564" cy:directed="1"/>
      <edge id="16170" label="Q9CZW5 (pp) P63038" source="12768" target="12247" cy:directed="1"/>
      <edge id="16169" label="Q9CZW5 (pp) Q6PB66" source="12768" target="12498" cy:directed="1"/>
      <edge id="16168" label="P20152 (pp) P16054" source="12767" target="12443" cy:directed="1"/>
      <edge id="16167" label="Q8BRT1 (pp) P28740" source="12766" target="12692" cy:directed="1"/>
      <edge id="16166" label="Q921M7 (pp) P68510" source="12764" target="12213" cy:directed="1"/>
      <edge id="16165" label="Q8R366 (pp) P04925" source="12762" target="12385" cy:directed="1"/>
      <edge id="16164" label="Q61206 (pp) P63005" source="12760" target="12306" cy:directed="1"/>
      <edge id="16163" label="Q03157 (pp) P12023" source="12757" target="12325" cy:directed="1"/>
      <edge id="16162" label="Q03157 (pp) Q9Z268" source="12757" target="12517" cy:directed="1"/>
      <edge id="16161" label="Q03157 (pp) Q9QXJ1" source="12757" target="12570" cy:directed="1"/>
      <edge id="16160" label="Q03157 (pp) P04925" source="12757" target="12385" cy:directed="1"/>
      <edge id="16159" label="Q8R5C5 (pp) P50516" source="12756" target="12293" cy:directed="1"/>
      <edge id="16158" label="Q91VT4 (pp) Q8QZT1" source="12754" target="12557" cy:directed="1"/>
      <edge id="16157" label="Q91VT4 (pp) Q9CR68" source="12754" target="12267" cy:directed="1"/>
      <edge id="16156" label="Q91VT4 (pp) Q99LC5" source="12754" target="12315" cy:directed="1"/>
      <edge id="16155" label="Q3THE2 (pp) Q01097" source="12752" target="12204" cy:directed="1"/>
      <edge id="16154" label="Q3THE2 (pp) P68510" source="12752" target="12213" cy:directed="1"/>
      <edge id="16153" label="Q920P5 (pp) P63101" source="12751" target="12479" cy:directed="1"/>
      <edge id="16152" label="Q2PFD7 (pp) P63101" source="12750" target="12479" cy:directed="1"/>
      <edge id="16151" label="Q7TMM9 (pp) P60879" source="12749" target="12381" cy:directed="1"/>
      <edge id="16150" label="Q7TMM9 (pp) P63101" source="12749" target="12479" cy:directed="1"/>
      <edge id="16149" label="Q91VR7 (pp) P14873" source="12747" target="12473" cy:directed="1"/>
      <edge id="16148" label="Q9CR62 (pp) Q9DC69" source="12746" target="12407" cy:directed="1"/>
      <edge id="16147" label="Q9CR62 (pp) Q9CZ13" source="12746" target="12249" cy:directed="1"/>
      <edge id="16146" label="Q8CHH9 (pp) P50516" source="12745" target="12293" cy:directed="1"/>
      <edge id="16145" label="P97300 (pp) Q99P72" source="12744" target="12678" cy:directed="1"/>
      <edge id="16144" label="O08917 (pp) Q60634" source="12742" target="12743" cy:directed="1"/>
      <edge id="16143" label="Q61316 (pp) Q60864" source="12741" target="12374" cy:directed="1"/>
      <edge id="16142" label="Q9D1T0 (pp) P12023" source="12740" target="12325" cy:directed="1"/>
      <edge id="16141" label="P11798 (pp) P35438" source="12738" target="12215" cy:directed="1"/>
      <edge id="16140" label="P11798 (pp) P63101" source="12738" target="12479" cy:directed="1"/>
      <edge id="16139" label="P11798 (pp) Q01097" source="12738" target="12204" cy:directed="1"/>
      <edge id="16138" label="P11798 (pp) P35436" source="12738" target="12220" cy:directed="1"/>
      <edge id="16137" label="P11798 (pp) P28652" source="12738" target="12576" cy:directed="1"/>
      <edge id="16136" label="P11798 (pp) O88935" source="12738" target="12431" cy:directed="1"/>
      <edge id="16135" label="P11798 (pp) Q9WU78" source="12738" target="12646" cy:directed="1"/>
      <edge id="16134" label="Q8K183 (pp) P63330" source="12737" target="12229" cy:directed="1"/>
      <edge id="16133" label="Q99NE5 (pp) Q9EQZ6" source="12736" target="12807" cy:directed="1"/>
      <edge id="16132" label="P57780 (pp) P09103" source="12734" target="12474" cy:directed="1"/>
      <edge id="16131" label="P57780 (pp) P50516" source="12734" target="12293" cy:directed="1"/>
      <edge id="16130" label="Q9QY76 (pp) O35526" source="12733" target="12329" cy:directed="1"/>
      <edge id="16129" label="Q9QY76 (pp) O08788" source="12733" target="12337" cy:directed="1"/>
      <edge id="16128" label="Q9QY76 (pp) P61264" source="12733" target="12467" cy:directed="1"/>
      <edge id="16127" label="Q9R1V6 (pp) Q9JIA1" source="12731" target="12795" cy:directed="1"/>
      <edge id="16126" label="Q9R1V6 (pp) Q01097" source="12731" target="12204" cy:directed="1"/>
      <edge id="16125" label="P48758 (pp) P62259" source="12730" target="12225" cy:directed="1"/>
      <edge id="16124" label="Q91XV3 (pp) P06837" source="12729" target="12507" cy:directed="1"/>
      <edge id="16123" label="Q91XV3 (pp) P60761" source="12729" target="12599" cy:directed="1"/>
      <edge id="16122" label="Q91XV3 (pp) P26645" source="12729" target="12705" cy:directed="1"/>
      <edge id="16121" label="Q91XV3 (pp) P68510" source="12729" target="12213" cy:directed="1"/>
      <edge id="16120" label="P55302 (pp) Q91ZX7" source="12728" target="12523" cy:directed="1"/>
      <edge id="16119" label="O88643 (pp) P60766" source="12726" target="12527" cy:directed="1"/>
      <edge id="16118" label="O88643 (pp) Q68FF6" source="12726" target="12583" cy:directed="1"/>
      <edge id="16117" label="O88643 (pp) Q61735" source="12726" target="12367" cy:directed="1"/>
      <edge id="16116" label="O88643 (pp) P63001" source="12726" target="12398" cy:directed="1"/>
      <edge id="16115" label="Q80TZ3 (pp) P50516" source="12725" target="12293" cy:directed="1"/>
      <edge id="16114" label="Q80TZ3 (pp) O08585" source="12725" target="12607" cy:directed="1"/>
      <edge id="16113" label="Q7TMB8 (pp) Q9JJV2" source="12724" target="12408" cy:directed="1"/>
      <edge id="16112" label="Q7TMB8 (pp) P28660" source="12724" target="12382" cy:directed="1"/>
      <edge id="16111" label="Q9WV55 (pp) Q62442" source="12723" target="12333" cy:directed="1"/>
      <edge id="16110" label="Q9WV55 (pp) Q9QY76" source="12723" target="12733" cy:directed="1"/>
      <edge id="16109" label="Q9WV55 (pp) P60879" source="12723" target="12381" cy:directed="1"/>
      <edge id="16108" label="Q9WV55 (pp) P63044" source="12723" target="12400" cy:directed="1"/>
      <edge id="16107" label="O55131 (pp) P42208" source="12722" target="12707" cy:directed="1"/>
      <edge id="16106" label="O35136 (pp) P11627" source="12721" target="12561" cy:directed="1"/>
      <edge id="16105" label="P12960 (pp) P04925" source="12719" target="12385" cy:directed="1"/>
      <edge id="16104" label="P12960 (pp) P11627" source="12719" target="12561" cy:directed="1"/>
      <edge id="16103" label="P12960 (pp) B9EKR1" source="12719" target="12609" cy:directed="1"/>
      <edge id="16102" label="Q61699 (pp) P68369" source="12718" target="12348" cy:directed="1"/>
      <edge id="16101" label="P08553 (pp) P46660" source="12717" target="12401" cy:directed="1"/>
      <edge id="16100" label="P08553 (pp) P19246" source="12717" target="12658" cy:directed="1"/>
      <edge id="16099" label="Q8K4Z3 (pp) Q9CZ42" source="12716" target="12688" cy:directed="1"/>
      <edge id="16098" label="Q8K4Z3 (pp) Q9Z1P6" source="12716" target="12299" cy:directed="1"/>
      <edge id="16097" label="P08551 (pp) P19246" source="12715" target="12658" cy:directed="1"/>
      <edge id="16096" label="P08551 (pp) P63101" source="12715" target="12479" cy:directed="1"/>
      <edge id="16095" label="Q8VDQ8 (pp) Q9DC69" source="12714" target="12407" cy:directed="1"/>
      <edge id="16094" label="O54983 (pp) Q8VDQ8" source="12713" target="12714" cy:directed="1"/>
      <edge id="16093" label="P18760 (pp) P40124" source="12711" target="12712" cy:directed="1"/>
      <edge id="16092" label="Q9Z2Q6 (pp) O55131" source="12709" target="12722" cy:directed="1"/>
      <edge id="16091" label="Q9Z2Q6 (pp) P42208" source="12709" target="12707" cy:directed="1"/>
      <edge id="16090" label="Q9WV34 (pp) Q01097" source="12708" target="12204" cy:directed="1"/>
      <edge id="16089" label="P28661 (pp) P42208" source="12706" target="12707" cy:directed="1"/>
      <edge id="16088" label="P26645 (pp) P63318" source="12705" target="12666" cy:directed="1"/>
      <edge id="16087" label="P84096 (pp) Q5FWK3" source="12704" target="12490" cy:directed="1"/>
      <edge id="16086" label="O35143 (pp) Q91VR2" source="12703" target="12263" cy:directed="1"/>
      <edge id="16085" label="O35143 (pp) Q9D3D9" source="12703" target="12210" cy:directed="1"/>
      <edge id="16084" label="P63321 (pp) P35438" source="12701" target="12215" cy:directed="1"/>
      <edge id="16083" label="Q8K021 (pp) Q62277" source="12700" target="12354" cy:directed="1"/>
      <edge id="16082" label="Q8CI94 (pp) Q9D0F9" source="12699" target="12635" cy:directed="1"/>
      <edge id="16081" label="Q8CI94 (pp) Q91ZJ5" source="12699" target="12614" cy:directed="1"/>
      <edge id="16080" label="Q8CI94 (pp) P50516" source="12699" target="12293" cy:directed="1"/>
      <edge id="16079" label="P48962 (pp) Q60931" source="12698" target="12556" cy:directed="1"/>
      <edge id="16078" label="P43406 (pp) Q71LX4" source="12696" target="12697" cy:directed="1"/>
      <edge id="16077" label="O35857 (pp) P17156" source="12694" target="12578" cy:directed="1"/>
      <edge id="16076" label="O35857 (pp) P62073" source="12694" target="12355" cy:directed="1"/>
      <edge id="16075" label="O35857 (pp) O35129" source="12694" target="12411" cy:directed="1"/>
      <edge id="16074" label="O35857 (pp) P38647" source="12694" target="12546" cy:directed="1"/>
      <edge id="16073" label="O35857 (pp) Q9D880" source="12694" target="12695" cy:directed="1"/>
      <edge id="16072" label="Q61490 (pp) P01831" source="12689" target="12619" cy:directed="1"/>
      <edge id="16071" label="Q9CZ42 (pp) P61922" source="12688" target="12324" cy:directed="1"/>
      <edge id="16070" label="P35564 (pp) P09103" source="12687" target="12474" cy:directed="1"/>
      <edge id="16069" label="P19096 (pp) Q9DCD0" source="12686" target="12222" cy:directed="1"/>
      <edge id="16068" label="P19096 (pp) Q64521" source="12686" target="12425" cy:directed="1"/>
      <edge id="16067" label="P19096 (pp) Q05920" source="12686" target="12254" cy:directed="1"/>
      <edge id="16066" label="Q61644 (pp) P39053" source="12685" target="12497" cy:directed="1"/>
      <edge id="16065" label="Q61644 (pp) Q8CHC4" source="12685" target="12639" cy:directed="1"/>
      <edge id="16064" label="Q61644 (pp) P10637" source="12685" target="12534" cy:directed="1"/>
      <edge id="16063" label="Q8BZ98 (pp) Q60631" source="12684" target="12353" cy:directed="1"/>
      <edge id="16062" label="Q8BZ98 (pp) Q60598" source="12684" target="12548" cy:directed="1"/>
      <edge id="16061" label="Q8BZ98 (pp) Q61644" source="12684" target="12685" cy:directed="1"/>
      <edge id="16060" label="Q5RJI5 (pp) P62259" source="12683" target="12225" cy:directed="1"/>
      <edge id="16059" label="P61164 (pp) P62259" source="12681" target="12225" cy:directed="1"/>
      <edge id="16058" label="Q8R191 (pp) Q62277" source="12680" target="12354" cy:directed="1"/>
      <edge id="16057" label="Q8R191 (pp) P50516" source="12680" target="12293" cy:directed="1"/>
      <edge id="16056" label="O35643 (pp) O08585" source="12679" target="12607" cy:directed="1"/>
      <edge id="16055" label="O35643 (pp) Q80TZ3" source="12679" target="12725" cy:directed="1"/>
      <edge id="16054" label="O35643 (pp) Q60631" source="12679" target="12353" cy:directed="1"/>
      <edge id="16053" label="Q99P72 (pp) Q9D1T0" source="12678" target="12740" cy:directed="1"/>
      <edge id="16052" label="Q99P72 (pp) P48722" source="12678" target="12702" cy:directed="1"/>
      <edge id="16051" label="Q60930 (pp) P48962" source="12677" target="12698" cy:directed="1"/>
      <edge id="16050" label="Q60930 (pp) Q9WUM5" source="12677" target="12276" cy:directed="1"/>
      <edge id="16049" label="Q60930 (pp) Q01097" source="12677" target="12204" cy:directed="1"/>
      <edge id="16048" label="Q60930 (pp) Q9CR68" source="12677" target="12267" cy:directed="1"/>
      <edge id="16047" label="P20444 (pp) P26645" source="12676" target="12705" cy:directed="1"/>
      <edge id="16046" label="Q9QXS1 (pp) P63101" source="12675" target="12479" cy:directed="1"/>
      <edge id="16045" label="Q9QXS1 (pp) Q64010" source="12675" target="12429" cy:directed="1"/>
      <edge id="16044" label="O08599 (pp) P16546" source="12674" target="12228" cy:directed="1"/>
      <edge id="16043" label="O08599 (pp) P61264" source="12674" target="12467" cy:directed="1"/>
      <edge id="16042" label="Q8BW75 (pp) Q9CZS1" source="12673" target="12412" cy:directed="1"/>
      <edge id="16041" label="Q8BW75 (pp) Q9DBF1" source="12673" target="12482" cy:directed="1"/>
      <edge id="16040" label="O35239 (pp) P46460" source="12672" target="12283" cy:directed="1"/>
      <edge id="16039" label="Q9EPJ9 (pp) P62331" source="12670" target="12318" cy:directed="1"/>
      <edge id="16038" label="P00405 (pp) Q6PB66" source="12669" target="12498" cy:directed="1"/>
      <edge id="16037" label="P00405 (pp) P03930" source="12669" target="12388" cy:directed="1"/>
      <edge id="16036" label="P56564 (pp) P28661" source="12668" target="12706" cy:directed="1"/>
      <edge id="16035" label="P56564 (pp) P63101" source="12668" target="12479" cy:directed="1"/>
      <edge id="16034" label="P63318 (pp) P35438" source="12666" target="12215" cy:directed="1"/>
      <edge id="16033" label="P58281 (pp) Q8K1M6" source="12664" target="12450" cy:directed="1"/>
      <edge id="16032" label="Q8R3V5 (pp) Q8CHC4" source="12663" target="12639" cy:directed="1"/>
      <edge id="16031" label="P67871 (pp) Q60737" source="12662" target="12804" cy:directed="1"/>
      <edge id="16030" label="Q810U3 (pp) Q8C8R3" source="12661" target="12227" cy:directed="1"/>
      <edge id="16029" label="P62743 (pp) O08585" source="12657" target="12607" cy:directed="1"/>
      <edge id="16028" label="Q60605 (pp) Q01097" source="12655" target="12204" cy:directed="1"/>
      <edge id="16027" label="P35279 (pp) Q61598" source="12651" target="12257" cy:directed="1"/>
      <edge id="16026" label="Q9CRB9 (pp) P16054" source="12650" target="12443" cy:directed="1"/>
      <edge id="16025" label="Q9CQI6 (pp) P60710" source="12649" target="12342" cy:directed="1"/>
      <edge id="16024" label="P50396 (pp) P63011" source="12647" target="12547" cy:directed="1"/>
      <edge id="16023" label="P50396 (pp) Q99PT1" source="12647" target="12433" cy:directed="1"/>
      <edge id="16022" label="P50396 (pp) P07901" source="12647" target="12508" cy:directed="1"/>
      <edge id="16021" label="P50396 (pp) P62821" source="12647" target="12648" cy:directed="1"/>
      <edge id="16020" label="Q9WU78 (pp) Q62419" source="12646" target="12612" cy:directed="1"/>
      <edge id="16019" label="Q9WU78 (pp) Q60631" source="12646" target="12353" cy:directed="1"/>
      <edge id="16018" label="Q9WU78 (pp) P05480" source="12646" target="12344" cy:directed="1"/>
      <edge id="16017" label="Q9WU78 (pp) Q62420" source="12646" target="12471" cy:directed="1"/>
      <edge id="16016" label="P0C0A3 (pp) Q9D8B3" source="12645" target="12618" cy:directed="1"/>
      <edge id="16015" label="P0C0A3 (pp) Q9WU78" source="12645" target="12646" cy:directed="1"/>
      <edge id="16014" label="Q9R0P9 (pp) O55042" source="12644" target="12616" cy:directed="1"/>
      <edge id="16013" label="Q9R0P9 (pp) Q99LX0" source="12644" target="12317" cy:directed="1"/>
      <edge id="16012" label="Q9R0P9 (pp) P68369" source="12644" target="12348" cy:directed="1"/>
      <edge id="16011" label="Q80UU9 (pp) P68510" source="12643" target="12213" cy:directed="1"/>
      <edge id="16010" label="Q60875 (pp) P84096" source="12641" target="12704" cy:directed="1"/>
      <edge id="16009" label="Q60875 (pp) Q8BG51" source="12641" target="12397" cy:directed="1"/>
      <edge id="16008" label="Q61411 (pp) P63038" source="12640" target="12247" cy:directed="1"/>
      <edge id="16007" label="Q61411 (pp) P35438" source="12640" target="12215" cy:directed="1"/>
      <edge id="16006" label="Q8CHC4 (pp) P50516" source="12639" target="12293" cy:directed="1"/>
      <edge id="16005" label="Q8CHC4 (pp) Q62420" source="12639" target="12471" cy:directed="1"/>
      <edge id="16004" label="Q91VZ6 (pp) Q68FD5" source="12638" target="12376" cy:directed="1"/>
      <edge id="16003" label="Q9WUB3 (pp) P47857" source="12637" target="12531" cy:directed="1"/>
      <edge id="16002" label="Q9WUB3 (pp) Q9D0F9" source="12637" target="12635" cy:directed="1"/>
      <edge id="16001" label="Q9WUB3 (pp) Q91ZJ5" source="12637" target="12614" cy:directed="1"/>
      <edge id="16000" label="Q9D0F9 (pp) Q91ZJ5" source="12635" target="12614" cy:directed="1"/>
      <edge id="15999" label="Q9D0F9 (pp) P17710" source="12635" target="12322" cy:directed="1"/>
      <edge id="15998" label="Q6PIC6 (pp) P04925" source="12633" target="12385" cy:directed="1"/>
      <edge id="15997" label="Q6PIC6 (pp) Q01097" source="12633" target="12204" cy:directed="1"/>
      <edge id="15996" label="Q80VP1 (pp) Q9Z0R4" source="12632" target="12601" cy:directed="1"/>
      <edge id="15995" label="P68181 (pp) P63101" source="12631" target="12479" cy:directed="1"/>
      <edge id="15994" label="P68181 (pp) P35438" source="12631" target="12215" cy:directed="1"/>
      <edge id="15993" label="P68181 (pp) P12367" source="12631" target="12417" cy:directed="1"/>
      <edge id="15992" label="P28663 (pp) P46460" source="12630" target="12283" cy:directed="1"/>
      <edge id="15991" label="P41216 (pp) Q99JY0" source="12628" target="12384" cy:directed="1"/>
      <edge id="15990" label="Q9D6F9 (pp) P50516" source="12627" target="12293" cy:directed="1"/>
      <edge id="15989" label="Q99MR8 (pp) Q99MN9" source="12625" target="12434" cy:directed="1"/>
      <edge id="15988" label="Q8BH04 (pp) P17182" source="12624" target="12515" cy:directed="1"/>
      <edge id="15987" label="Q8BH04 (pp) Q05920" source="12624" target="12254" cy:directed="1"/>
      <edge id="15986" label="Q8BWF0 (pp) Q05920" source="12623" target="12254" cy:directed="1"/>
      <edge id="15985" label="Q8BWF0 (pp) P61922" source="12623" target="12324" cy:directed="1"/>
      <edge id="15984" label="Q8BWF0 (pp) P70404" source="12623" target="12294" cy:directed="1"/>
      <edge id="15983" label="Q8BWF0 (pp) Q60597" source="12623" target="12511" cy:directed="1"/>
      <edge id="15982" label="Q91WC3 (pp) P50516" source="12622" target="12293" cy:directed="1"/>
      <edge id="15981" label="Q3UVX5 (pp) P35438" source="12621" target="12215" cy:directed="1"/>
      <edge id="15980" label="Q3UVX5 (pp) P62204" source="12621" target="12579" cy:directed="1"/>
      <edge id="15979" label="Q3UVX5 (pp) P04925" source="12621" target="12385" cy:directed="1"/>
      <edge id="15978" label="P20357 (pp) P14873" source="12620" target="12473" cy:directed="1"/>
      <edge id="15977" label="P20357 (pp) P12367" source="12620" target="12417" cy:directed="1"/>
      <edge id="15976" label="P20357 (pp) O88935" source="12620" target="12431" cy:directed="1"/>
      <edge id="15975" label="P20357 (pp) Q9ERD7" source="12620" target="12772" cy:directed="1"/>
      <edge id="15974" label="P20357 (pp) P11798" source="12620" target="12738" cy:directed="1"/>
      <edge id="15973" label="P20357 (pp) Q6PHZ2" source="12620" target="12341" cy:directed="1"/>
      <edge id="15972" label="P20357 (pp) P35438" source="12620" target="12215" cy:directed="1"/>
      <edge id="15971" label="Q9D8B3 (pp) Q9WU78" source="12618" target="12646" cy:directed="1"/>
      <edge id="15970" label="O55042 (pp) O35526" source="12616" target="12329" cy:directed="1"/>
      <edge id="15969" label="P63328 (pp) P63137" source="12615" target="12300" cy:directed="1"/>
      <edge id="15968" label="P63328 (pp) Q63810" source="12615" target="12779" cy:directed="1"/>
      <edge id="15967" label="P63328 (pp) O35465" source="12615" target="12446" cy:directed="1"/>
      <edge id="15966" label="P63328 (pp) P35438" source="12615" target="12215" cy:directed="1"/>
      <edge id="15965" label="P63328 (pp) P22723" source="12615" target="12656" cy:directed="1"/>
      <edge id="15964" label="Q62419 (pp) Q9D8B3" source="12612" target="12618" cy:directed="1"/>
      <edge id="15963" label="Q62419 (pp) P39053" source="12612" target="12497" cy:directed="1"/>
      <edge id="15962" label="Q62419 (pp) Q7TQF7" source="12612" target="12505" cy:directed="1"/>
      <edge id="15961" label="P45376 (pp) P16054" source="12611" target="12443" cy:directed="1"/>
      <edge id="15960" label="O54991 (pp) Q99P72" source="12610" target="12678" cy:directed="1"/>
      <edge id="15959" label="B9EKR1 (pp) O54991" source="12609" target="12610" cy:directed="1"/>
      <edge id="15958" label="Q9QYR6 (pp) Q91VR7" source="12608" target="12747" cy:directed="1"/>
      <edge id="15957" label="O08585 (pp) Q80VP1" source="12607" target="12632" cy:directed="1"/>
      <edge id="15956" label="O08585 (pp) Q91VR2" source="12607" target="12263" cy:directed="1"/>
      <edge id="15955" label="Q60932 (pp) P48962" source="12606" target="12698" cy:directed="1"/>
      <edge id="15954" label="Q60932 (pp) Q01097" source="12606" target="12204" cy:directed="1"/>
      <edge id="15953" label="Q60932 (pp) P16054" source="12606" target="12443" cy:directed="1"/>
      <edge id="15952" label="Q60932 (pp) P17710" source="12606" target="12322" cy:directed="1"/>
      <edge id="15951" label="Q60932 (pp) Q99LX0" source="12606" target="12317" cy:directed="1"/>
      <edge id="15950" label="Q3UHL1 (pp) P60761" source="12605" target="12599" cy:directed="1"/>
      <edge id="15949" label="Q3UHL1 (pp) P63101" source="12605" target="12479" cy:directed="1"/>
      <edge id="15948" label="Q9CPQ1 (pp) P56391" source="12604" target="12331" cy:directed="1"/>
      <edge id="15947" label="Q9CPQ1 (pp) P00405" source="12604" target="12669" cy:directed="1"/>
      <edge id="15946" label="Q9CPQ1 (pp) Q9D855" source="12604" target="12403" cy:directed="1"/>
      <edge id="15945" label="Q9CPQ1 (pp) Q9DB20" source="12604" target="12239" cy:directed="1"/>
      <edge id="15944" label="Q9CPQ1 (pp) Q9CQZ5" source="12604" target="12206" cy:directed="1"/>
      <edge id="15943" label="Q9CPQ1 (pp) P43024" source="12604" target="12472" cy:directed="1"/>
      <edge id="15942" label="Q9CPQ1 (pp) P56379" source="12604" target="12415" cy:directed="1"/>
      <edge id="15941" label="Q9CPQ1 (pp) Q9CQH3" source="12604" target="12240" cy:directed="1"/>
      <edge id="15940" label="Q9CPQ1 (pp) Q9CQQ7" source="12604" target="12409" cy:directed="1"/>
      <edge id="15939" label="Q9CPQ1 (pp) Q9CQZ6" source="12604" target="12231" cy:directed="1"/>
      <edge id="15938" label="Q9CPQ1 (pp) Q9D3D9" source="12604" target="12210" cy:directed="1"/>
      <edge id="15937" label="Q9CPQ1 (pp) Q99LY9" source="12604" target="12252" cy:directed="1"/>
      <edge id="15936" label="Q9CPQ1 (pp) P97450" source="12604" target="12430" cy:directed="1"/>
      <edge id="15935" label="Q9CPQ1 (pp) Q9CQJ8" source="12604" target="12270" cy:directed="1"/>
      <edge id="15934" label="Q9CPQ1 (pp) Q9DB77" source="12604" target="12405" cy:directed="1"/>
      <edge id="15933" label="Q9CPQ1 (pp) P17665" source="12604" target="12555" cy:directed="1"/>
      <edge id="15932" label="Q9CPQ1 (pp) P48771" source="12604" target="12303" cy:directed="1"/>
      <edge id="15931" label="Q9CPQ1 (pp) Q9CPP6" source="12604" target="12281" cy:directed="1"/>
      <edge id="15930" label="Q9CPQ1 (pp) Q9CQ69" source="12604" target="12234" cy:directed="1"/>
      <edge id="15929" label="Q9CPQ1 (pp) Q9DCX2" source="12604" target="12366" cy:directed="1"/>
      <edge id="15928" label="Q9CPQ1 (pp) Q9D6J6" source="12604" target="12207" cy:directed="1"/>
      <edge id="15927" label="Q9CPQ1 (pp) Q03265" source="12604" target="12212" cy:directed="1"/>
      <edge id="15926" label="Q9CPQ1 (pp) P19783" source="12604" target="12245" cy:directed="1"/>
      <edge id="15925" label="Q9CPQ1 (pp) Q06185" source="12604" target="12271" cy:directed="1"/>
      <edge id="15924" label="Q9CPQ1 (pp) Q91VR2" source="12604" target="12263" cy:directed="1"/>
      <edge id="15923" label="Q9CPQ1 (pp) Q9ERS2" source="12604" target="12339" cy:directed="1"/>
      <edge id="15922" label="Q5SQX6 (pp) P28660" source="12603" target="12382" cy:directed="1"/>
      <edge id="15921" label="Q80Y14 (pp) Q99KI0" source="12602" target="12338" cy:directed="1"/>
      <edge id="15920" label="Q80Y14 (pp) Q99KB8" source="12602" target="12785" cy:directed="1"/>
      <edge id="15919" label="Q80Y14 (pp) Q9DCB8" source="12602" target="12542" cy:directed="1"/>
      <edge id="15918" label="Q80Y14 (pp) P99029" source="12602" target="12356" cy:directed="1"/>
      <edge id="15917" label="Q9Z0R4 (pp) P50516" source="12601" target="12293" cy:directed="1"/>
      <edge id="15916" label="Q9Z0R4 (pp) P39053" source="12601" target="12497" cy:directed="1"/>
      <edge id="15915" label="P00493 (pp) P04925" source="12600" target="12385" cy:directed="1"/>
      <edge id="15914" label="P00493 (pp) Q9R0Y5" source="12600" target="12572" cy:directed="1"/>
      <edge id="15913" label="P00493 (pp) P06151" source="12600" target="12238" cy:directed="1"/>
      <edge id="15912" label="P00493 (pp) P17742" source="12600" target="12259" cy:directed="1"/>
      <edge id="15911" label="P00493 (pp) P52480" source="12600" target="12455" cy:directed="1"/>
      <edge id="15910" label="P00493 (pp) Q9R111" source="12600" target="12634" cy:directed="1"/>
      <edge id="15909" label="P00493 (pp) Q99LC5" source="12600" target="12315" cy:directed="1"/>
      <edge id="15908" label="P60761 (pp) P06837" source="12599" target="12507" cy:directed="1"/>
      <edge id="15907" label="Q64332 (pp) P46460" source="12598" target="12283" cy:directed="1"/>
      <edge id="15906" label="Q64332 (pp) Q9JJV2" source="12598" target="12408" cy:directed="1"/>
      <edge id="15905" label="Q64332 (pp) P62259" source="12598" target="12225" cy:directed="1"/>
      <edge id="15904" label="Q64332 (pp) P60761" source="12598" target="12599" cy:directed="1"/>
      <edge id="15903" label="O70318 (pp) O70589" source="12597" target="12564" cy:directed="1"/>
      <edge id="15902" label="O70318 (pp) P63001" source="12597" target="12398" cy:directed="1"/>
      <edge id="15901" label="O08539 (pp) Q8BZ98" source="12596" target="12684" cy:directed="1"/>
      <edge id="15900" label="O08539 (pp) Q8R3V5" source="12596" target="12663" cy:directed="1"/>
      <edge id="15899" label="O08539 (pp) P10637" source="12596" target="12534" cy:directed="1"/>
      <edge id="15898" label="Q9CS84 (pp) O70589" source="12595" target="12564" cy:directed="1"/>
      <edge id="15897" label="Q9CS84 (pp) O88952" source="12595" target="12244" cy:directed="1"/>
      <edge id="15896" label="Q9CS84 (pp) Q8BYM5" source="12595" target="12592" cy:directed="1"/>
      <edge id="15895" label="Q9JIS5 (pp) Q68FF6" source="12593" target="12583" cy:directed="1"/>
      <edge id="15894" label="Q4ACU6 (pp) Q60631" source="12591" target="12353" cy:directed="1"/>
      <edge id="15893" label="Q4ACU6 (pp) Q8BYM5" source="12591" target="12592" cy:directed="1"/>
      <edge id="15892" label="P48453 (pp) P63328" source="12590" target="12615" cy:directed="1"/>
      <edge id="15891" label="P48453 (pp) P62204" source="12590" target="12579" cy:directed="1"/>
      <edge id="15890" label="P48453 (pp) P63101" source="12590" target="12479" cy:directed="1"/>
      <edge id="15889" label="Q925I1 (pp) O35658" source="12589" target="12364" cy:directed="1"/>
      <edge id="15888" label="Q62261 (pp) P13595" source="12588" target="12562" cy:directed="1"/>
      <edge id="15887" label="Q62261 (pp) Q810U4" source="12588" target="12791" cy:directed="1"/>
      <edge id="15886" label="Q62261 (pp) P16546" source="12588" target="12228" cy:directed="1"/>
      <edge id="15885" label="Q62261 (pp) Q01097" source="12588" target="12204" cy:directed="1"/>
      <edge id="15884" label="Q62261 (pp) P35438" source="12588" target="12215" cy:directed="1"/>
      <edge id="15883" label="Q62261 (pp) P63101" source="12588" target="12479" cy:directed="1"/>
      <edge id="15882" label="Q9R0N7 (pp) Q9Z0P4" source="12587" target="12782" cy:directed="1"/>
      <edge id="15881" label="Q9R0N7 (pp) P60879" source="12587" target="12381" cy:directed="1"/>
      <edge id="15880" label="P30999 (pp) Q60598" source="12584" target="12548" cy:directed="1"/>
      <edge id="15879" label="P30999 (pp) P35438" source="12584" target="12215" cy:directed="1"/>
      <edge id="15878" label="P30999 (pp) Q02248" source="12584" target="12343" cy:directed="1"/>
      <edge id="15877" label="Q68FF6 (pp) P62204" source="12583" target="12579" cy:directed="1"/>
      <edge id="15876" label="Q68FF6 (pp) B9EKR1" source="12583" target="12609" cy:directed="1"/>
      <edge id="15875" label="Q68FF6 (pp) P63101" source="12583" target="12479" cy:directed="1"/>
      <edge id="15874" label="P23818 (pp) P23819" source="12582" target="12219" cy:directed="1"/>
      <edge id="15873" label="P23818 (pp) Q3UVX5" source="12582" target="12621" cy:directed="1"/>
      <edge id="15872" label="P23818 (pp) P35438" source="12582" target="12215" cy:directed="1"/>
      <edge id="15871" label="P23818 (pp) P35436" source="12582" target="12220" cy:directed="1"/>
      <edge id="15870" label="Q9DBJ1 (pp) P52480" source="12581" target="12455" cy:directed="1"/>
      <edge id="15869" label="Q9DBJ1 (pp) P17182" source="12581" target="12515" cy:directed="1"/>
      <edge id="15868" label="Q9DBJ1 (pp) P17751" source="12581" target="12297" cy:directed="1"/>
      <edge id="15867" label="Q9DBJ1 (pp) Q99K85" source="12581" target="12577" cy:directed="1"/>
      <edge id="15866" label="Q9DBJ1 (pp) P06745" source="12581" target="12464" cy:directed="1"/>
      <edge id="15865" label="Q9DBJ1 (pp) P09411" source="12581" target="12298" cy:directed="1"/>
      <edge id="15864" label="Q9DBJ1 (pp) Q93092" source="12581" target="12454" cy:directed="1"/>
      <edge id="15863" label="P68254 (pp) P10637" source="12580" target="12534" cy:directed="1"/>
      <edge id="15862" label="P62204 (pp) P63101" source="12579" target="12479" cy:directed="1"/>
      <edge id="15861" label="P62204 (pp) O70589" source="12579" target="12564" cy:directed="1"/>
      <edge id="15860" label="P62204 (pp) P63328" source="12579" target="12615" cy:directed="1"/>
      <edge id="15859" label="P62204 (pp) P35438" source="12579" target="12215" cy:directed="1"/>
      <edge id="15858" label="Q99K85 (pp) O88712" source="12577" target="12541" cy:directed="1"/>
      <edge id="15857" label="Q99K85 (pp) Q91Z53" source="12577" target="12335" cy:directed="1"/>
      <edge id="15856" label="P28652 (pp) Q01097" source="12576" target="12204" cy:directed="1"/>
      <edge id="15855" label="P28652 (pp) Q6PHZ2" source="12576" target="12341" cy:directed="1"/>
      <edge id="15854" label="P28652 (pp) P35436" source="12576" target="12220" cy:directed="1"/>
      <edge id="15853" label="P28652 (pp) P23819" source="12576" target="12219" cy:directed="1"/>
      <edge id="15852" label="Q6PIE5 (pp) P70414" source="12574" target="12575" cy:directed="1"/>
      <edge id="15851" label="P47802 (pp) O88441" source="12573" target="12295" cy:directed="1"/>
      <edge id="15850" label="Q9R0Y5 (pp) Q9DCD0" source="12572" target="12222" cy:directed="1"/>
      <edge id="15849" label="Q9QXJ1 (pp) P12023" source="12570" target="12325" cy:directed="1"/>
      <edge id="15848" label="Q9QXJ1 (pp) P04925" source="12570" target="12385" cy:directed="1"/>
      <edge id="15847" label="P84091 (pp) Q9DBG3" source="12569" target="12536" cy:directed="1"/>
      <edge id="15846" label="P84091 (pp) Q6IRU5" source="12569" target="12537" cy:directed="1"/>
      <edge id="15845" label="P84091 (pp) P62743" source="12569" target="12657" cy:directed="1"/>
      <edge id="15844" label="P84091 (pp) Q80VP1" source="12569" target="12632" cy:directed="1"/>
      <edge id="15843" label="P84091 (pp) O08585" source="12569" target="12607" cy:directed="1"/>
      <edge id="15842" label="P84091 (pp) Q68FD5" source="12569" target="12376" cy:directed="1"/>
      <edge id="15841" label="P84091 (pp) P50516" source="12569" target="12293" cy:directed="1"/>
      <edge id="15840" label="P84091 (pp) P17426" source="12569" target="12291" cy:directed="1"/>
      <edge id="15839" label="P99024 (pp) P60879" source="12567" target="12381" cy:directed="1"/>
      <edge id="15838" label="P99024 (pp) Q6PER3" source="12567" target="12307" cy:directed="1"/>
      <edge id="15837" label="P99024 (pp) O70589" source="12567" target="12564" cy:directed="1"/>
      <edge id="15836" label="P03995 (pp) P63101" source="12566" target="12479" cy:directed="1"/>
      <edge id="15835" label="P03995 (pp) Q9QXS1" source="12566" target="12675" cy:directed="1"/>
      <edge id="15834" label="O70589 (pp) O88935" source="12564" target="12431" cy:directed="1"/>
      <edge id="15833" label="O70589 (pp) O08599" source="12564" target="12674" cy:directed="1"/>
      <edge id="15832" label="O70589 (pp) P60469" source="12564" target="12613" cy:directed="1"/>
      <edge id="15831" label="O70589 (pp) P16330" source="12564" target="12565" cy:directed="1"/>
      <edge id="15830" label="Q8BKX1 (pp) P28660" source="12563" target="12382" cy:directed="1"/>
      <edge id="15829" label="Q8BKX1 (pp) P62259" source="12563" target="12225" cy:directed="1"/>
      <edge id="15828" label="P13595 (pp) P16546" source="12562" target="12228" cy:directed="1"/>
      <edge id="15827" label="P13595 (pp) P04925" source="12562" target="12385" cy:directed="1"/>
      <edge id="15826" label="P13595 (pp) Q9CQV8" source="12562" target="12357" cy:directed="1"/>
      <edge id="15825" label="P11627 (pp) P13595" source="12561" target="12562" cy:directed="1"/>
      <edge id="15824" label="P62746 (pp) P63330" source="12560" target="12229" cy:directed="1"/>
      <edge id="15823" label="P62746 (pp) Q5FWK3" source="12560" target="12490" cy:directed="1"/>
      <edge id="15822" label="P62746 (pp) Q8BG51" source="12560" target="12397" cy:directed="1"/>
      <edge id="15821" label="Q8VD37 (pp) P17426" source="12558" target="12291" cy:directed="1"/>
      <edge id="15820" label="Q8VD37 (pp) P35564" source="12558" target="12687" cy:directed="1"/>
      <edge id="15819" label="Q8VD37 (pp) Q62420" source="12558" target="12471" cy:directed="1"/>
      <edge id="15818" label="Q8QZT1 (pp) Q99LC5" source="12557" target="12315" cy:directed="1"/>
      <edge id="15817" label="Q8QZT1 (pp) Q8BMF4" source="12557" target="12253" cy:directed="1"/>
      <edge id="15816" label="Q8QZT1 (pp) Q8BWT1" source="12557" target="12311" cy:directed="1"/>
      <edge id="15815" label="Q8QZT1 (pp) Q9DBL1" source="12557" target="12451" cy:directed="1"/>
      <edge id="15814" label="Q8QZT1 (pp) Q9D0K2" source="12557" target="12277" cy:directed="1"/>
      <edge id="15813" label="Q8QZT1 (pp) O08756" source="12557" target="12383" cy:directed="1"/>
      <edge id="15812" label="Q8QZT1 (pp) Q99JY0" source="12557" target="12384" cy:directed="1"/>
      <edge id="15811" label="Q8QZT1 (pp) Q9WUM5" source="12557" target="12276" cy:directed="1"/>
      <edge id="15810" label="Q8QZT1 (pp) Q9D2G2" source="12557" target="12287" cy:directed="1"/>
      <edge id="15809" label="Q8QZT1 (pp) Q8BMS1" source="12557" target="12516" cy:directed="1"/>
      <edge id="15808" label="Q60931 (pp) Q9CQH3" source="12556" target="12240" cy:directed="1"/>
      <edge id="15807" label="Q60931 (pp) Q9D6J6" source="12556" target="12207" cy:directed="1"/>
      <edge id="15806" label="Q9JLZ3 (pp) Q99MR8" source="12554" target="12625" cy:directed="1"/>
      <edge id="15805" label="Q9JLZ3 (pp) Q8BH95" source="12554" target="12248" cy:directed="1"/>
      <edge id="15804" label="Q9JLZ3 (pp) Q9JLJ2" source="12554" target="12262" cy:directed="1"/>
      <edge id="15803" label="Q9JLZ3 (pp) Q61425" source="12554" target="12314" cy:directed="1"/>
      <edge id="15802" label="Q9JLZ3 (pp) Q3ULD5" source="12554" target="12350" cy:directed="1"/>
      <edge id="15801" label="Q8VDP6 (pp) O55023" source="12551" target="12642" cy:directed="1"/>
      <edge id="15800" label="Q8VDP6 (pp) P63082" source="12551" target="12448" cy:directed="1"/>
      <edge id="15799" label="Q8VDP6 (pp) Q9Z1B3" source="12551" target="12309" cy:directed="1"/>
      <edge id="15798" label="Q8VDP6 (pp) Q99L43" source="12551" target="12552" cy:directed="1"/>
      <edge id="15797" label="Q9Z0X1 (pp) P17742" source="12550" target="12259" cy:directed="1"/>
      <edge id="15796" label="Q9Z0X1 (pp) Q8K1M6" source="12550" target="12450" cy:directed="1"/>
      <edge id="15795" label="Q60598 (pp) Q9JM76" source="12548" target="12378" cy:directed="1"/>
      <edge id="15794" label="Q60598 (pp) Q5FWK3" source="12548" target="12490" cy:directed="1"/>
      <edge id="15793" label="Q60598 (pp) P23819" source="12548" target="12219" cy:directed="1"/>
      <edge id="15792" label="Q60598 (pp) P59999" source="12548" target="12492" cy:directed="1"/>
      <edge id="15791" label="Q60598 (pp) P63085" source="12548" target="12255" cy:directed="1"/>
      <edge id="15790" label="Q60598 (pp) Q01097" source="12548" target="12204" cy:directed="1"/>
      <edge id="15789" label="Q60598 (pp) P35438" source="12548" target="12215" cy:directed="1"/>
      <edge id="15788" label="Q60598 (pp) Q9CVB6" source="12548" target="12493" cy:directed="1"/>
      <edge id="15787" label="Q60598 (pp) Q80Z38" source="12548" target="12205" cy:directed="1"/>
      <edge id="15786" label="Q60598 (pp) P05480" source="12548" target="12344" cy:directed="1"/>
      <edge id="15785" label="Q60598 (pp) P61161" source="12548" target="12549" cy:directed="1"/>
      <edge id="15784" label="P63011 (pp) P47708" source="12547" target="12654" cy:directed="1"/>
      <edge id="15783" label="P63011 (pp) P35438" source="12547" target="12215" cy:directed="1"/>
      <edge id="15782" label="P63011 (pp) Q99NE5" source="12547" target="12736" cy:directed="1"/>
      <edge id="15781" label="P38647 (pp) Q60864" source="12546" target="12374" cy:directed="1"/>
      <edge id="15780" label="P38647 (pp) Q8JZQ2" source="12546" target="12393" cy:directed="1"/>
      <edge id="15779" label="P38647 (pp) P63038" source="12546" target="12247" cy:directed="1"/>
      <edge id="15778" label="P38647 (pp) Q9QYJ0" source="12546" target="12375" cy:directed="1"/>
      <edge id="15777" label="P38647 (pp) P63101" source="12546" target="12479" cy:directed="1"/>
      <edge id="15776" label="Q62425 (pp) Q9CQH3" source="12545" target="12240" cy:directed="1"/>
      <edge id="15775" label="Q62425 (pp) Q99LX0" source="12545" target="12317" cy:directed="1"/>
      <edge id="15774" label="Q62425 (pp) Q9CQ69" source="12545" target="12234" cy:directed="1"/>
      <edge id="15773" label="Q62425 (pp) P68510" source="12545" target="12213" cy:directed="1"/>
      <edge id="15772" label="Q62425 (pp) Q3UIU2" source="12545" target="12288" cy:directed="1"/>
      <edge id="15771" label="Q62425 (pp) P16054" source="12545" target="12443" cy:directed="1"/>
      <edge id="15770" label="Q62425 (pp) O09111" source="12545" target="12211" cy:directed="1"/>
      <edge id="15769" label="Q62425 (pp) Q9Z1P6" source="12545" target="12299" cy:directed="1"/>
      <edge id="15768" label="Q62425 (pp) Q9DCJ5" source="12545" target="12380" cy:directed="1"/>
      <edge id="15767" label="Q62425 (pp) Q9CQ54" source="12545" target="12232" cy:directed="1"/>
      <edge id="15766" label="Q62425 (pp) Q9DCS9" source="12545" target="12266" cy:directed="1"/>
      <edge id="15765" label="Q8BMF3 (pp) Q05920" source="12544" target="12254" cy:directed="1"/>
      <edge id="15764" label="Q8BMF3 (pp) P52480" source="12544" target="12455" cy:directed="1"/>
      <edge id="15763" label="Q8BMF3 (pp) P06151" source="12544" target="12238" cy:directed="1"/>
      <edge id="15762" label="Q9DCB8 (pp) Q9D6J6" source="12542" target="12207" cy:directed="1"/>
      <edge id="15761" label="Q9DCB8 (pp) Q99KI0" source="12542" target="12338" cy:directed="1"/>
      <edge id="15760" label="Q9DCB8 (pp) Q9Z1J3" source="12542" target="12543" cy:directed="1"/>
      <edge id="15759" label="O88712 (pp) Q62420" source="12541" target="12471" cy:directed="1"/>
      <edge id="15758" label="Q8BHL5 (pp) Q60631" source="12540" target="12353" cy:directed="1"/>
      <edge id="15757" label="Q9QXS6 (pp) P62259" source="12539" target="12225" cy:directed="1"/>
      <edge id="15756" label="P17183 (pp) P06745" source="12538" target="12464" cy:directed="1"/>
      <edge id="15755" label="P17183 (pp) P56480" source="12538" target="12258" cy:directed="1"/>
      <edge id="15754" label="P17183 (pp) Q93092" source="12538" target="12454" cy:directed="1"/>
      <edge id="15753" label="P17183 (pp) P52480" source="12538" target="12455" cy:directed="1"/>
      <edge id="15752" label="P17183 (pp) P09411" source="12538" target="12298" cy:directed="1"/>
      <edge id="15751" label="P17183 (pp) Q8BH04" source="12538" target="12624" cy:directed="1"/>
      <edge id="15750" label="P17183 (pp) P17751" source="12538" target="12297" cy:directed="1"/>
      <edge id="15749" label="P17183 (pp) P05063" source="12538" target="12512" cy:directed="1"/>
      <edge id="15748" label="P17183 (pp) Q9DBJ1" source="12538" target="12581" cy:directed="1"/>
      <edge id="15747" label="P17183 (pp) P05064" source="12538" target="12321" cy:directed="1"/>
      <edge id="15746" label="P17183 (pp) P40142" source="12538" target="12359" cy:directed="1"/>
      <edge id="15745" label="Q6IRU5 (pp) Q61548" source="12537" target="12418" cy:directed="1"/>
      <edge id="15744" label="Q6IRU5 (pp) P17426" source="12537" target="12291" cy:directed="1"/>
      <edge id="15743" label="Q6IRU5 (pp) P62743" source="12537" target="12657" cy:directed="1"/>
      <edge id="15742" label="Q9DBG3 (pp) Q80VP1" source="12536" target="12632" cy:directed="1"/>
      <edge id="15741" label="Q9DBG3 (pp) P60879" source="12536" target="12381" cy:directed="1"/>
      <edge id="15740" label="Q9DBG3 (pp) P62743" source="12536" target="12657" cy:directed="1"/>
      <edge id="15739" label="Q9DBG3 (pp) P63101" source="12536" target="12479" cy:directed="1"/>
      <edge id="15738" label="Q9DBG3 (pp) P17426" source="12536" target="12291" cy:directed="1"/>
      <edge id="15737" label="Q9DBG3 (pp) Q68FD5" source="12536" target="12376" cy:directed="1"/>
      <edge id="15736" label="Q9DBG3 (pp) O70161" source="12536" target="12308" cy:directed="1"/>
      <edge id="15735" label="Q9DBG3 (pp) O08585" source="12536" target="12607" cy:directed="1"/>
      <edge id="15734" label="Q9DBG3 (pp) Q6IRU5" source="12536" target="12537" cy:directed="1"/>
      <edge id="15733" label="P10637 (pp) Q99LX0" source="12534" target="12317" cy:directed="1"/>
      <edge id="15732" label="P10637 (pp) Q9D8Y0" source="12534" target="12783" cy:directed="1"/>
      <edge id="15731" label="P10637 (pp) Q9QXJ1" source="12534" target="12570" cy:directed="1"/>
      <edge id="15730" label="P10637 (pp) O55042" source="12534" target="12616" cy:directed="1"/>
      <edge id="15729" label="P10637 (pp) P04925" source="12534" target="12385" cy:directed="1"/>
      <edge id="15728" label="P10637 (pp) P12023" source="12534" target="12325" cy:directed="1"/>
      <edge id="15727" label="Q922R8 (pp) P12023" source="12533" target="12325" cy:directed="1"/>
      <edge id="15726" label="P47857 (pp) Q9R0Y5" source="12531" target="12572" cy:directed="1"/>
      <edge id="15725" label="P47857 (pp) P05063" source="12531" target="12512" cy:directed="1"/>
      <edge id="15724" label="P47857 (pp) P05064" source="12531" target="12321" cy:directed="1"/>
      <edge id="15723" label="P47857 (pp) P63101" source="12531" target="12479" cy:directed="1"/>
      <edge id="15722" label="Q62048 (pp) P63085" source="12529" target="12255" cy:directed="1"/>
      <edge id="15721" label="Q99104 (pp) P35438" source="12528" target="12215" cy:directed="1"/>
      <edge id="15720" label="Q99104 (pp) P63101" source="12528" target="12479" cy:directed="1"/>
      <edge id="15719" label="Q99104 (pp) P08551" source="12528" target="12715" cy:directed="1"/>
      <edge id="15718" label="Q99104 (pp) P03995" source="12528" target="12566" cy:directed="1"/>
      <edge id="15717" label="Q99104 (pp) Q01097" source="12528" target="12204" cy:directed="1"/>
      <edge id="15716" label="P60766 (pp) Q8BG51" source="12527" target="12397" cy:directed="1"/>
      <edge id="15715" label="P60766 (pp) Q5FWK3" source="12527" target="12490" cy:directed="1"/>
      <edge id="15714" label="P60766 (pp) Q99PT1" source="12527" target="12433" cy:directed="1"/>
      <edge id="15713" label="P60766 (pp) P63005" source="12527" target="12306" cy:directed="1"/>
      <edge id="15712" label="Q6R891 (pp) P63101" source="12526" target="12479" cy:directed="1"/>
      <edge id="15711" label="Q6R891 (pp) Q60875" source="12526" target="12641" cy:directed="1"/>
      <edge id="15710" label="Q6R891 (pp) Q62277" source="12526" target="12354" cy:directed="1"/>
      <edge id="15709" label="P62835 (pp) P35438" source="12525" target="12215" cy:directed="1"/>
      <edge id="15708" label="Q8BLK3 (pp) P04925" source="12524" target="12385" cy:directed="1"/>
      <edge id="15707" label="Q91ZX7 (pp) Q9D6K5" source="12523" target="12786" cy:directed="1"/>
      <edge id="15706" label="Q91ZX7 (pp) P12023" source="12523" target="12325" cy:directed="1"/>
      <edge id="15705" label="P08226 (pp) P20357" source="12522" target="12620" cy:directed="1"/>
      <edge id="15704" label="P08226 (pp) P10637" source="12522" target="12534" cy:directed="1"/>
      <edge id="15703" label="P08226 (pp) P12023" source="12522" target="12325" cy:directed="1"/>
      <edge id="15702" label="P08226 (pp) P04925" source="12522" target="12385" cy:directed="1"/>
      <edge id="15701" label="P08226 (pp) Q91ZX7" source="12522" target="12523" cy:directed="1"/>
      <edge id="15700" label="Q8R0S4 (pp) Q9D6F9" source="12521" target="12627" cy:directed="1"/>
      <edge id="15699" label="Q61290 (pp) Q8R0S4" source="12520" target="12521" cy:directed="1"/>
      <edge id="15698" label="P42125 (pp) Q99JY0" source="12519" target="12384" cy:directed="1"/>
      <edge id="15697" label="P42125 (pp) Q8K1Z0" source="12519" target="12319" cy:directed="1"/>
      <edge id="15696" label="P42125 (pp) Q8BH95" source="12519" target="12248" cy:directed="1"/>
      <edge id="15695" label="P42125 (pp) Q91YT0" source="12519" target="12379" cy:directed="1"/>
      <edge id="15694" label="P42125 (pp) Q9CQ62" source="12519" target="12285" cy:directed="1"/>
      <edge id="15693" label="P42125 (pp) O08756" source="12519" target="12383" cy:directed="1"/>
      <edge id="15692" label="P42125 (pp) Q9DCJ5" source="12519" target="12380" cy:directed="1"/>
      <edge id="15691" label="P42125 (pp) Q99LC5" source="12519" target="12315" cy:directed="1"/>
      <edge id="15690" label="P42125 (pp) P51174" source="12519" target="12392" cy:directed="1"/>
      <edge id="15689" label="P42125 (pp) Q61425" source="12519" target="12314" cy:directed="1"/>
      <edge id="15688" label="P42125 (pp) O09111" source="12519" target="12211" cy:directed="1"/>
      <edge id="15687" label="P42125 (pp) Q8BMS1" source="12519" target="12516" cy:directed="1"/>
      <edge id="15686" label="P42125 (pp) Q9JHI5" source="12519" target="12453" cy:directed="1"/>
      <edge id="15685" label="P42125 (pp) Q9Z1P6" source="12519" target="12299" cy:directed="1"/>
      <edge id="15684" label="Q8BGD5 (pp) P50544" source="12518" target="12459" cy:directed="1"/>
      <edge id="15683" label="Q9Z268 (pp) Q06335" source="12517" target="12218" cy:directed="1"/>
      <edge id="15682" label="P17182 (pp) Q9DCD0" source="12515" target="12222" cy:directed="1"/>
      <edge id="15681" label="P17182 (pp) Q9WUA3" source="12515" target="12510" cy:directed="1"/>
      <edge id="15680" label="P17182 (pp) P63101" source="12515" target="12479" cy:directed="1"/>
      <edge id="15679" label="Q9CPW4 (pp) Q9JM76" source="12514" target="12378" cy:directed="1"/>
      <edge id="15678" label="Q9CPW4 (pp) P59999" source="12514" target="12492" cy:directed="1"/>
      <edge id="15677" label="Q8BKZ9 (pp) P97807" source="12513" target="12340" cy:directed="1"/>
      <edge id="15676" label="Q8BKZ9 (pp) Q60597" source="12513" target="12511" cy:directed="1"/>
      <edge id="15675" label="Q8BKZ9 (pp) Q9D051" source="12513" target="12209" cy:directed="1"/>
      <edge id="15674" label="Q8BKZ9 (pp) Q922H2" source="12513" target="12691" cy:directed="1"/>
      <edge id="15673" label="Q8BKZ9 (pp) P35486" source="12513" target="12439" cy:directed="1"/>
      <edge id="15672" label="Q8BKZ9 (pp) Q8BMF4" source="12513" target="12253" cy:directed="1"/>
      <edge id="15671" label="P05063 (pp) P17182" source="12512" target="12515" cy:directed="1"/>
      <edge id="15670" label="P05063 (pp) Q91VR2" source="12512" target="12263" cy:directed="1"/>
      <edge id="15669" label="P05063 (pp) P17710" source="12512" target="12322" cy:directed="1"/>
      <edge id="15668" label="P05063 (pp) Q9WUA3" source="12512" target="12510" cy:directed="1"/>
      <edge id="15667" label="Q9WUA3 (pp) P63101" source="12510" target="12479" cy:directed="1"/>
      <edge id="15666" label="P61982 (pp) P35438" source="12509" target="12215" cy:directed="1"/>
      <edge id="15665" label="P61982 (pp) P10637" source="12509" target="12534" cy:directed="1"/>
      <edge id="15664" label="P61982 (pp) Q9DC28" source="12509" target="12652" cy:directed="1"/>
      <edge id="15663" label="P61982 (pp) P62259" source="12509" target="12225" cy:directed="1"/>
      <edge id="15662" label="P61982 (pp) P63101" source="12509" target="12479" cy:directed="1"/>
      <edge id="15661" label="P07901 (pp) Q61699" source="12508" target="12718" cy:directed="1"/>
      <edge id="15660" label="P07901 (pp) Q60864" source="12508" target="12374" cy:directed="1"/>
      <edge id="15659" label="P07901 (pp) Q9DC28" source="12508" target="12652" cy:directed="1"/>
      <edge id="15658" label="P07901 (pp) Q99KJ8" source="12508" target="12336" cy:directed="1"/>
      <edge id="15657" label="P07901 (pp) P63038" source="12508" target="12247" cy:directed="1"/>
      <edge id="15656" label="P07901 (pp) Q9CR16" source="12508" target="12735" cy:directed="1"/>
      <edge id="15655" label="P07901 (pp) P62259" source="12508" target="12225" cy:directed="1"/>
      <edge id="15654" label="P07901 (pp) P63037" source="12508" target="12279" cy:directed="1"/>
      <edge id="15653" label="P07901 (pp) P11499" source="12508" target="12320" cy:directed="1"/>
      <edge id="15652" label="P07901 (pp) P61982" source="12508" target="12509" cy:directed="1"/>
      <edge id="15651" label="P06837 (pp) P62204" source="12507" target="12579" cy:directed="1"/>
      <edge id="15650" label="P15116 (pp) P30999" source="12506" target="12584" cy:directed="1"/>
      <edge id="15649" label="P15116 (pp) P23242" source="12506" target="12732" cy:directed="1"/>
      <edge id="15648" label="P15116 (pp) P35438" source="12506" target="12215" cy:directed="1"/>
      <edge id="15647" label="P15116 (pp) Q02248" source="12506" target="12343" cy:directed="1"/>
      <edge id="15646" label="Q7TQF7 (pp) Q62420" source="12505" target="12471" cy:directed="1"/>
      <edge id="15645" label="Q7TQF7 (pp) Q8BZ98" source="12505" target="12684" cy:directed="1"/>
      <edge id="15644" label="Q7TQF7 (pp) Q9DBG3" source="12505" target="12536" cy:directed="1"/>
      <edge id="15643" label="Q7TQF7 (pp) P39053" source="12505" target="12497" cy:directed="1"/>
      <edge id="15642" label="Q7TQF7 (pp) Q8CHC4" source="12505" target="12639" cy:directed="1"/>
      <edge id="15641" label="Q7TQF7 (pp) Q9EP69" source="12505" target="12470" cy:directed="1"/>
      <edge id="15640" label="Q7TQF7 (pp) Q68FD5" source="12505" target="12376" cy:directed="1"/>
      <edge id="15639" label="Q7TQF7 (pp) P17427" source="12505" target="12290" cy:directed="1"/>
      <edge id="15638" label="Q99L47 (pp) P63038" source="12504" target="12247" cy:directed="1"/>
      <edge id="15637" label="P29758 (pp) P15105" source="12503" target="12282" cy:directed="1"/>
      <edge id="15636" label="P29758 (pp) P12023" source="12503" target="12325" cy:directed="1"/>
      <edge id="15635" label="Q8CHT0 (pp) P15105" source="12502" target="12282" cy:directed="1"/>
      <edge id="15634" label="Q8CHT0 (pp) Q9DBF1" source="12502" target="12482" cy:directed="1"/>
      <edge id="15633" label="Q8CHT0 (pp) P29758" source="12502" target="12503" cy:directed="1"/>
      <edge id="15632" label="P97772 (pp) P35438" source="12501" target="12215" cy:directed="1"/>
      <edge id="15631" label="P97772 (pp) Q3UHD9" source="12501" target="12241" cy:directed="1"/>
      <edge id="15630" label="P31324 (pp) P68181" source="12499" target="12631" cy:directed="1"/>
      <edge id="15629" label="P31324 (pp) P35438" source="12499" target="12215" cy:directed="1"/>
      <edge id="15628" label="P31324 (pp) P63101" source="12499" target="12479" cy:directed="1"/>
      <edge id="15627" label="P31324 (pp) P20357" source="12499" target="12620" cy:directed="1"/>
      <edge id="15626" label="P31324 (pp) P12367" source="12499" target="12417" cy:directed="1"/>
      <edge id="15625" label="P31324 (pp) Q8BR92" source="12499" target="12500" cy:directed="1"/>
      <edge id="15624" label="Q6PB66 (pp) P68510" source="12498" target="12213" cy:directed="1"/>
      <edge id="15623" label="P39053 (pp) Q8CHC4" source="12497" target="12639" cy:directed="1"/>
      <edge id="15622" label="P39053 (pp) Q9CQ92" source="12497" target="12449" cy:directed="1"/>
      <edge id="15621" label="P39053 (pp) O08539" source="12497" target="12596" cy:directed="1"/>
      <edge id="15620" label="P39053 (pp) P35438" source="12497" target="12215" cy:directed="1"/>
      <edge id="15619" label="P39053 (pp) P28740" source="12497" target="12692" cy:directed="1"/>
      <edge id="15618" label="P39053 (pp) P17426" source="12497" target="12291" cy:directed="1"/>
      <edge id="15617" label="P39053 (pp) Q68FD5" source="12497" target="12376" cy:directed="1"/>
      <edge id="15616" label="P39053 (pp) P04925" source="12497" target="12385" cy:directed="1"/>
      <edge id="15615" label="Q6PH08 (pp) Q99NE5" source="12496" target="12736" cy:directed="1"/>
      <edge id="15614" label="Q6PH08 (pp) P62259" source="12496" target="12225" cy:directed="1"/>
      <edge id="15613" label="O88737 (pp) Q99NE5" source="12495" target="12736" cy:directed="1"/>
      <edge id="15612" label="O88737 (pp) Q6PH08" source="12495" target="12496" cy:directed="1"/>
      <edge id="15611" label="Q9CQC7 (pp) Q9D6J6" source="12494" target="12207" cy:directed="1"/>
      <edge id="15610" label="Q9CQC7 (pp) Q9CQQ7" source="12494" target="12409" cy:directed="1"/>
      <edge id="15609" label="Q9CQC7 (pp) Q91YT0" source="12494" target="12379" cy:directed="1"/>
      <edge id="15608" label="Q9CQC7 (pp) Q9DCS9" source="12494" target="12266" cy:directed="1"/>
      <edge id="15607" label="Q9CQC7 (pp) Q3UIU2" source="12494" target="12288" cy:directed="1"/>
      <edge id="15606" label="Q9CQC7 (pp) Q99LC3" source="12494" target="12251" cy:directed="1"/>
      <edge id="15605" label="Q9CQC7 (pp) Q62425" source="12494" target="12545" cy:directed="1"/>
      <edge id="15604" label="Q9CQC7 (pp) Q99LY9" source="12494" target="12252" cy:directed="1"/>
      <edge id="15603" label="Q9CQC7 (pp) Q9D6J5" source="12494" target="12487" cy:directed="1"/>
      <edge id="15602" label="Q9CQC7 (pp) Q8K3J1" source="12494" target="12404" cy:directed="1"/>
      <edge id="15601" label="Q9CQC7 (pp) Q9CQH3" source="12494" target="12240" cy:directed="1"/>
      <edge id="15600" label="Q9CQC7 (pp) Q9DCJ5" source="12494" target="12380" cy:directed="1"/>
      <edge id="15599" label="Q9CQC7 (pp) Q9CQZ6" source="12494" target="12231" cy:directed="1"/>
      <edge id="15598" label="Q9CQC7 (pp) Q9DC69" source="12494" target="12407" cy:directed="1"/>
      <edge id="15597" label="Q9CQC7 (pp) Q9Z1P6" source="12494" target="12299" cy:directed="1"/>
      <edge id="15596" label="Q9CQC7 (pp) Q06185" source="12494" target="12271" cy:directed="1"/>
      <edge id="15595" label="Q9CQC7 (pp) Q9CQ54" source="12494" target="12232" cy:directed="1"/>
      <edge id="15594" label="Q9CVB6 (pp) P59999" source="12493" target="12492" cy:directed="1"/>
      <edge id="15593" label="Q9CVB6 (pp) P47757" source="12493" target="12226" cy:directed="1"/>
      <edge id="15592" label="Q9CVB6 (pp) Q9D898" source="12493" target="12421" cy:directed="1"/>
      <edge id="15591" label="Q9CVB6 (pp) Q99JY9" source="12493" target="12435" cy:directed="1"/>
      <edge id="15590" label="Q9CVB6 (pp) P60710" source="12493" target="12342" cy:directed="1"/>
      <edge id="15589" label="Q9CVB6 (pp) Q9R0Q6" source="12493" target="12377" cy:directed="1"/>
      <edge id="15588" label="Q9CVB6 (pp) P67871" source="12493" target="12662" cy:directed="1"/>
      <edge id="15587" label="Q9CVB6 (pp) Q9CPW4" source="12493" target="12514" cy:directed="1"/>
      <edge id="15586" label="Q9CVB6 (pp) Q9JM76" source="12493" target="12378" cy:directed="1"/>
      <edge id="15585" label="Q5FWK3 (pp) Q9QUI0" source="12490" target="12217" cy:directed="1"/>
      <edge id="15584" label="Q5FWK3 (pp) P63005" source="12490" target="12306" cy:directed="1"/>
      <edge id="15583" label="Q9WTT4 (pp) P63082" source="12489" target="12448" cy:directed="1"/>
      <edge id="15582" label="Q9WTT4 (pp) P50516" source="12489" target="12293" cy:directed="1"/>
      <edge id="15581" label="Q00612 (pp) P06745" source="12488" target="12464" cy:directed="1"/>
      <edge id="15580" label="Q00612 (pp) Q9DCD0" source="12488" target="12222" cy:directed="1"/>
      <edge id="15579" label="Q00612 (pp) P17751" source="12488" target="12297" cy:directed="1"/>
      <edge id="15578" label="Q00612 (pp) P97807" source="12488" target="12340" cy:directed="1"/>
      <edge id="15577" label="Q00612 (pp) P09671" source="12488" target="12444" cy:directed="1"/>
      <edge id="15576" label="Q00612 (pp) P40142" source="12488" target="12359" cy:directed="1"/>
      <edge id="15575" label="Q00612 (pp) Q93092" source="12488" target="12454" cy:directed="1"/>
      <edge id="15574" label="Q9D6J5 (pp) Q9CPQ8" source="12487" target="12264" cy:directed="1"/>
      <edge id="15573" label="Q9D6J5 (pp) Q91YT0" source="12487" target="12379" cy:directed="1"/>
      <edge id="15572" label="Q9D6J5 (pp) Q9DC69" source="12487" target="12407" cy:directed="1"/>
      <edge id="15571" label="Q9D6J5 (pp) Q9D3D9" source="12487" target="12210" cy:directed="1"/>
      <edge id="15570" label="Q9D6J5 (pp) Q9CQQ7" source="12487" target="12409" cy:directed="1"/>
      <edge id="15569" label="Q9D6J5 (pp) Q9CQZ6" source="12487" target="12231" cy:directed="1"/>
      <edge id="15568" label="Q9D6J5 (pp) O09111" source="12487" target="12211" cy:directed="1"/>
      <edge id="15567" label="Q9D6J5 (pp) Q9ERS2" source="12487" target="12339" cy:directed="1"/>
      <edge id="15566" label="Q9D6J5 (pp) Q9DCJ5" source="12487" target="12380" cy:directed="1"/>
      <edge id="15565" label="Q9D6J5 (pp) Q9CQ69" source="12487" target="12234" cy:directed="1"/>
      <edge id="15564" label="Q9D6J5 (pp) Q9DB77" source="12487" target="12405" cy:directed="1"/>
      <edge id="15563" label="Q9D6J5 (pp) Q99LC3" source="12487" target="12251" cy:directed="1"/>
      <edge id="15562" label="Q9D6J5 (pp) Q9DCS9" source="12487" target="12266" cy:directed="1"/>
      <edge id="15561" label="Q9D6J5 (pp) Q3UIU2" source="12487" target="12288" cy:directed="1"/>
      <edge id="15560" label="Q9D6J5 (pp) Q06185" source="12487" target="12271" cy:directed="1"/>
      <edge id="15559" label="Q9D6J5 (pp) Q9CZ13" source="12487" target="12249" cy:directed="1"/>
      <edge id="15558" label="Q9D6J5 (pp) Q9D6J6" source="12487" target="12207" cy:directed="1"/>
      <edge id="15557" label="Q9D6J5 (pp) Q8K3J1" source="12487" target="12404" cy:directed="1"/>
      <edge id="15556" label="Q9D6J5 (pp) Q99LX0" source="12487" target="12317" cy:directed="1"/>
      <edge id="15555" label="Q9D6J5 (pp) Q9CQH3" source="12487" target="12240" cy:directed="1"/>
      <edge id="15554" label="Q9D6J5 (pp) Q9Z1P6" source="12487" target="12299" cy:directed="1"/>
      <edge id="15553" label="Q9D6J5 (pp) Q9CQ54" source="12487" target="12232" cy:directed="1"/>
      <edge id="15552" label="Q9D6J5 (pp) Q91VD9" source="12487" target="12265" cy:directed="1"/>
      <edge id="15551" label="Q9D6J5 (pp) Q91VR2" source="12487" target="12263" cy:directed="1"/>
      <edge id="15550" label="P23506 (pp) Q9CQH3" source="12486" target="12240" cy:directed="1"/>
      <edge id="15549" label="Q6PCP5 (pp) P23506" source="12485" target="12486" cy:directed="1"/>
      <edge id="15548" label="Q8VDN2 (pp) P35438" source="12484" target="12215" cy:directed="1"/>
      <edge id="15547" label="Q8VDN2 (pp) P14094" source="12484" target="12436" cy:directed="1"/>
      <edge id="15546" label="Q8VDN2 (pp) Q01097" source="12484" target="12204" cy:directed="1"/>
      <edge id="15545" label="Q8VDN2 (pp) P63044" source="12484" target="12400" cy:directed="1"/>
      <edge id="15544" label="Q8VDN2 (pp) P70414" source="12484" target="12575" cy:directed="1"/>
      <edge id="15543" label="Q8VDN2 (pp) P60879" source="12484" target="12381" cy:directed="1"/>
      <edge id="15542" label="Q8VDN2 (pp) P23819" source="12484" target="12219" cy:directed="1"/>
      <edge id="15541" label="Q9QWI6 (pp) Q68FF6" source="12480" target="12583" cy:directed="1"/>
      <edge id="15540" label="Q9QWI6 (pp) P05480" source="12480" target="12344" cy:directed="1"/>
      <edge id="15539" label="Q9QWI6 (pp) Q8R001" source="12480" target="12481" cy:directed="1"/>
      <edge id="15538" label="P63101 (pp) Q64332" source="12479" target="12598" cy:directed="1"/>
      <edge id="15537" label="P63101 (pp) P10637" source="12479" target="12534" cy:directed="1"/>
      <edge id="15536" label="P63101 (pp) P20357" source="12479" target="12620" cy:directed="1"/>
      <edge id="15535" label="P63101 (pp) P08553" source="12479" target="12717" cy:directed="1"/>
      <edge id="15534" label="P63101 (pp) Q80U28" source="12479" target="12659" cy:directed="1"/>
      <edge id="15533" label="P63101 (pp) P17156" source="12479" target="12578" cy:directed="1"/>
      <edge id="15532" label="P63101 (pp) P47757" source="12479" target="12226" cy:directed="1"/>
      <edge id="15531" label="P63101 (pp) Q8BPN8" source="12479" target="12447" cy:directed="1"/>
      <edge id="15530" label="P63101 (pp) P16546" source="12479" target="12228" cy:directed="1"/>
      <edge id="15529" label="P63101 (pp) P13020" source="12479" target="12777" cy:directed="1"/>
      <edge id="15528" label="P63101 (pp) F6SEU4" source="12479" target="12763" cy:directed="1"/>
      <edge id="15527" label="P63101 (pp) Q60875" source="12479" target="12641" cy:directed="1"/>
      <edge id="15526" label="P63101 (pp) Q920I9" source="12479" target="12463" cy:directed="1"/>
      <edge id="15525" label="P63101 (pp) Q9R0K7" source="12479" target="12423" cy:directed="1"/>
      <edge id="15524" label="P63101 (pp) P30999" source="12479" target="12584" cy:directed="1"/>
      <edge id="15523" label="P63101 (pp) P60469" source="12479" target="12613" cy:directed="1"/>
      <edge id="15522" label="P63101 (pp) P12367" source="12479" target="12417" cy:directed="1"/>
      <edge id="15521" label="P63101 (pp) P16330" source="12479" target="12565" cy:directed="1"/>
      <edge id="15520" label="P63101 (pp) P28652" source="12479" target="12576" cy:directed="1"/>
      <edge id="15519" label="P63101 (pp) Q7TSJ2" source="12479" target="12720" cy:directed="1"/>
      <edge id="15518" label="P63101 (pp) Q925I1" source="12479" target="12589" cy:directed="1"/>
      <edge id="15517" label="P63101 (pp) P28740" source="12479" target="12692" cy:directed="1"/>
      <edge id="15516" label="P63101 (pp) P46660" source="12479" target="12401" cy:directed="1"/>
      <edge id="15515" label="P63101 (pp) O88935" source="12479" target="12431" cy:directed="1"/>
      <edge id="15514" label="P63101 (pp) Q62465" source="12479" target="12636" cy:directed="1"/>
      <edge id="15513" label="P63101 (pp) P63328" source="12479" target="12615" cy:directed="1"/>
      <edge id="15512" label="P63101 (pp) P62482" source="12479" target="12585" cy:directed="1"/>
      <edge id="15511" label="Q61879 (pp) P35438" source="12478" target="12215" cy:directed="1"/>
      <edge id="15510" label="Q61879 (pp) P63101" source="12478" target="12479" cy:directed="1"/>
      <edge id="15509" label="Q91ZA3 (pp) Q99JY0" source="12477" target="12384" cy:directed="1"/>
      <edge id="15508" label="Q91ZA3 (pp) Q9EQ20" source="12477" target="12362" cy:directed="1"/>
      <edge id="15507" label="Q3UMR5 (pp) P50516" source="12476" target="12293" cy:directed="1"/>
      <edge id="15506" label="P56382 (pp) Q03265" source="12475" target="12212" cy:directed="1"/>
      <edge id="15505" label="P56382 (pp) Q91VM9" source="12475" target="12406" cy:directed="1"/>
      <edge id="15504" label="P56382 (pp) Q91VR2" source="12475" target="12263" cy:directed="1"/>
      <edge id="15503" label="P56382 (pp) P56480" source="12475" target="12258" cy:directed="1"/>
      <edge id="15502" label="P56382 (pp) Q9D3D9" source="12475" target="12210" cy:directed="1"/>
      <edge id="15501" label="P56382 (pp) Q9CQZ5" source="12475" target="12206" cy:directed="1"/>
      <edge id="15500" label="P56382 (pp) P03930" source="12475" target="12388" cy:directed="1"/>
      <edge id="15499" label="P56382 (pp) Q9CQQ7" source="12475" target="12409" cy:directed="1"/>
      <edge id="15498" label="P56382 (pp) Q9DB20" source="12475" target="12239" cy:directed="1"/>
      <edge id="15497" label="P56382 (pp) Q99LX0" source="12475" target="12317" cy:directed="1"/>
      <edge id="15496" label="P56382 (pp) Q9DCX2" source="12475" target="12366" cy:directed="1"/>
      <edge id="15495" label="P56382 (pp) Q06185" source="12475" target="12271" cy:directed="1"/>
      <edge id="15494" label="P56382 (pp) P97450" source="12475" target="12430" cy:directed="1"/>
      <edge id="15493" label="P09103 (pp) Q922R8" source="12474" target="12533" cy:directed="1"/>
      <edge id="15492" label="P09103 (pp) P04925" source="12474" target="12385" cy:directed="1"/>
      <edge id="15491" label="P09103 (pp) P63038" source="12474" target="12247" cy:directed="1"/>
      <edge id="15490" label="P14873 (pp) Q9QYR6" source="12473" target="12608" cy:directed="1"/>
      <edge id="15489" label="P14873 (pp) P63005" source="12473" target="12306" cy:directed="1"/>
      <edge id="15488" label="P14873 (pp) P62259" source="12473" target="12225" cy:directed="1"/>
      <edge id="15487" label="P43024 (pp) Q9ERS2" source="12472" target="12339" cy:directed="1"/>
      <edge id="15486" label="P43024 (pp) P56391" source="12472" target="12331" cy:directed="1"/>
      <edge id="15485" label="P43024 (pp) Q9DCX2" source="12472" target="12366" cy:directed="1"/>
      <edge id="15484" label="P43024 (pp) Q9D3D9" source="12472" target="12210" cy:directed="1"/>
      <edge id="15483" label="P43024 (pp) P00405" source="12472" target="12669" cy:directed="1"/>
      <edge id="15482" label="P43024 (pp) Q91VR2" source="12472" target="12263" cy:directed="1"/>
      <edge id="15481" label="P43024 (pp) Q9CQ69" source="12472" target="12234" cy:directed="1"/>
      <edge id="15480" label="Q62420 (pp) P39053" source="12471" target="12497" cy:directed="1"/>
      <edge id="15479" label="Q62420 (pp) O08585" source="12471" target="12607" cy:directed="1"/>
      <edge id="15478" label="Q9EP69 (pp) Q8CHC4" source="12470" target="12639" cy:directed="1"/>
      <edge id="15477" label="Q9EP69 (pp) Q68FD5" source="12470" target="12376" cy:directed="1"/>
      <edge id="15476" label="Q9EP69 (pp) Q62420" source="12470" target="12471" cy:directed="1"/>
      <edge id="15475" label="P26040 (pp) P11627" source="12469" target="12561" cy:directed="1"/>
      <edge id="15474" label="P70441 (pp) P26040" source="12468" target="12469" cy:directed="1"/>
      <edge id="15473" label="P61264 (pp) P63044" source="12467" target="12400" cy:directed="1"/>
      <edge id="15472" label="Q7TPR4 (pp) Q2PFD7" source="12466" target="12750" cy:directed="1"/>
      <edge id="15471" label="Q3UTJ2 (pp) O08917" source="12465" target="12742" cy:directed="1"/>
      <edge id="15470" label="Q3UTJ2 (pp) Q7TPR4" source="12465" target="12466" cy:directed="1"/>
      <edge id="15469" label="P06745 (pp) P17710" source="12464" target="12322" cy:directed="1"/>
      <edge id="15468" label="P06745 (pp) P05063" source="12464" target="12512" cy:directed="1"/>
      <edge id="15467" label="P06745 (pp) P09411" source="12464" target="12298" cy:directed="1"/>
      <edge id="15466" label="P06745 (pp) P16858" source="12464" target="12559" cy:directed="1"/>
      <edge id="15465" label="P06745 (pp) P06151" source="12464" target="12238" cy:directed="1"/>
      <edge id="15464" label="P06745 (pp) Q9D0F9" source="12464" target="12635" cy:directed="1"/>
      <edge id="15463" label="P06745 (pp) Q9DCD0" source="12464" target="12222" cy:directed="1"/>
      <edge id="15462" label="P06745 (pp) P17182" source="12464" target="12515" cy:directed="1"/>
      <edge id="15461" label="P06745 (pp) O55023" source="12464" target="12642" cy:directed="1"/>
      <edge id="15460" label="P06745 (pp) P47857" source="12464" target="12531" cy:directed="1"/>
      <edge id="15459" label="P06745 (pp) Q05920" source="12464" target="12254" cy:directed="1"/>
      <edge id="15458" label="P06745 (pp) Q9WUM5" source="12464" target="12276" cy:directed="1"/>
      <edge id="15457" label="P06745 (pp) Q9WUA3" source="12464" target="12510" cy:directed="1"/>
      <edge id="15456" label="P06745 (pp) P05064" source="12464" target="12321" cy:directed="1"/>
      <edge id="15455" label="Q920I9 (pp) Q8BPN8" source="12463" target="12447" cy:directed="1"/>
      <edge id="15454" label="Q923T9 (pp) P63101" source="12462" target="12479" cy:directed="1"/>
      <edge id="15453" label="Q923T9 (pp) P35436" source="12462" target="12220" cy:directed="1"/>
      <edge id="15452" label="P63040 (pp) P63044" source="12461" target="12400" cy:directed="1"/>
      <edge id="15451" label="Q61831 (pp) Q01097" source="12460" target="12204" cy:directed="1"/>
      <edge id="15450" label="Q61831 (pp) P35438" source="12460" target="12215" cy:directed="1"/>
      <edge id="15449" label="P50544 (pp) Q8BMS1" source="12459" target="12516" cy:directed="1"/>
      <edge id="15448" label="P50544 (pp) Q91WC3" source="12459" target="12622" cy:directed="1"/>
      <edge id="15447" label="P50544 (pp) P41216" source="12459" target="12628" cy:directed="1"/>
      <edge id="15446" label="Q9Z2I9 (pp) Q99LC5" source="12458" target="12315" cy:directed="1"/>
      <edge id="15445" label="Q9Z2I9 (pp) P97807" source="12458" target="12340" cy:directed="1"/>
      <edge id="15444" label="Q9Z2I9 (pp) Q9D023" source="12458" target="12416" cy:directed="1"/>
      <edge id="15443" label="Q9Z2I9 (pp) Q9D2G2" source="12458" target="12287" cy:directed="1"/>
      <edge id="15442" label="Q9Z2I9 (pp) P50516" source="12458" target="12293" cy:directed="1"/>
      <edge id="15441" label="Q9Z2I9 (pp) Q8R4N0" source="12458" target="12351" cy:directed="1"/>
      <edge id="15440" label="Q9Z2I9 (pp) Q03265" source="12458" target="12212" cy:directed="1"/>
      <edge id="15439" label="Q9Z2I9 (pp) Q8CAQ8" source="12458" target="12553" cy:directed="1"/>
      <edge id="15438" label="Q9Z2I9 (pp) Q91VD9" source="12458" target="12265" cy:directed="1"/>
      <edge id="15437" label="Q9Z2I9 (pp) P23506" source="12458" target="12486" cy:directed="1"/>
      <edge id="15436" label="Q9Z2I9 (pp) Q9WUM5" source="12458" target="12276" cy:directed="1"/>
      <edge id="15435" label="Q9Z2I9 (pp) Q60597" source="12458" target="12511" cy:directed="1"/>
      <edge id="15434" label="Q61301 (pp) P15116" source="12457" target="12506" cy:directed="1"/>
      <edge id="15433" label="Q9DB05 (pp) P46460" source="12456" target="12283" cy:directed="1"/>
      <edge id="15432" label="P52480 (pp) P17710" source="12455" target="12322" cy:directed="1"/>
      <edge id="15431" label="P52480 (pp) P06745" source="12455" target="12464" cy:directed="1"/>
      <edge id="15430" label="P52480 (pp) P05064" source="12455" target="12321" cy:directed="1"/>
      <edge id="15429" label="P52480 (pp) Q05920" source="12455" target="12254" cy:directed="1"/>
      <edge id="15428" label="P52480 (pp) Q9WUB3" source="12455" target="12637" cy:directed="1"/>
      <edge id="15427" label="P52480 (pp) P06151" source="12455" target="12238" cy:directed="1"/>
      <edge id="15426" label="P52480 (pp) Q9DCD0" source="12455" target="12222" cy:directed="1"/>
      <edge id="15425" label="P52480 (pp) P09411" source="12455" target="12298" cy:directed="1"/>
      <edge id="15424" label="P52480 (pp) P05063" source="12455" target="12512" cy:directed="1"/>
      <edge id="15423" label="P52480 (pp) Q8BH04" source="12455" target="12624" cy:directed="1"/>
      <edge id="15422" label="P52480 (pp) Q9WUA3" source="12455" target="12510" cy:directed="1"/>
      <edge id="15421" label="P52480 (pp) P47857" source="12455" target="12531" cy:directed="1"/>
      <edge id="15420" label="P52480 (pp) Q9R0Y5" source="12455" target="12572" cy:directed="1"/>
      <edge id="15419" label="P52480 (pp) P17182" source="12455" target="12515" cy:directed="1"/>
      <edge id="15418" label="P52480 (pp) P54071" source="12455" target="12237" cy:directed="1"/>
      <edge id="15417" label="Q93092 (pp) P97807" source="12454" target="12340" cy:directed="1"/>
      <edge id="15416" label="Q93092 (pp) P05063" source="12454" target="12512" cy:directed="1"/>
      <edge id="15415" label="Q93092 (pp) P05064" source="12454" target="12321" cy:directed="1"/>
      <edge id="15414" label="Q93092 (pp) P06745" source="12454" target="12464" cy:directed="1"/>
      <edge id="15413" label="Q93092 (pp) Q9D0F9" source="12454" target="12635" cy:directed="1"/>
      <edge id="15412" label="Q93092 (pp) P17710" source="12454" target="12322" cy:directed="1"/>
      <edge id="15411" label="Q93092 (pp) Q9WUA3" source="12454" target="12510" cy:directed="1"/>
      <edge id="15410" label="Q93092 (pp) P17182" source="12454" target="12515" cy:directed="1"/>
      <edge id="15409" label="Q93092 (pp) Q9DCD0" source="12454" target="12222" cy:directed="1"/>
      <edge id="15408" label="Q93092 (pp) P06151" source="12454" target="12238" cy:directed="1"/>
      <edge id="15407" label="Q93092 (pp) P47857" source="12454" target="12531" cy:directed="1"/>
      <edge id="15406" label="Q93092 (pp) P52480" source="12454" target="12455" cy:directed="1"/>
      <edge id="15405" label="Q9JHI5 (pp) Q99LC5" source="12453" target="12315" cy:directed="1"/>
      <edge id="15404" label="Q9JHI5 (pp) Q61425" source="12453" target="12314" cy:directed="1"/>
      <edge id="15403" label="Q9JHI5 (pp) Q99MR8" source="12453" target="12625" cy:directed="1"/>
      <edge id="15402" label="Q9JHI5 (pp) Q8BMS1" source="12453" target="12516" cy:directed="1"/>
      <edge id="15401" label="P53395 (pp) Q9DBL1" source="12452" target="12451" cy:directed="1"/>
      <edge id="15400" label="P53395 (pp) Q3ULD5" source="12452" target="12350" cy:directed="1"/>
      <edge id="15399" label="P53395 (pp) Q9D051" source="12452" target="12209" cy:directed="1"/>
      <edge id="15398" label="P53395 (pp) Q99MN9" source="12452" target="12434" cy:directed="1"/>
      <edge id="15397" label="P53395 (pp) Q60597" source="12452" target="12511" cy:directed="1"/>
      <edge id="15396" label="P53395 (pp) Q8K2B3" source="12452" target="12347" cy:directed="1"/>
      <edge id="15395" label="P53395 (pp) P35486" source="12452" target="12439" cy:directed="1"/>
      <edge id="15394" label="P53395 (pp) Q9WUM5" source="12452" target="12276" cy:directed="1"/>
      <edge id="15393" label="P53395 (pp) O08749" source="12452" target="12208" cy:directed="1"/>
      <edge id="15392" label="P53395 (pp) Q9JHI5" source="12452" target="12453" cy:directed="1"/>
      <edge id="15391" label="Q9DBL1 (pp) Q8BMS1" source="12451" target="12516" cy:directed="1"/>
      <edge id="15390" label="Q9CQ92 (pp) Q8BZ98" source="12449" target="12684" cy:directed="1"/>
      <edge id="15389" label="Q9CQ92 (pp) Q6PCP5" source="12449" target="12485" cy:directed="1"/>
      <edge id="15388" label="Q9CQ92 (pp) Q8K1M6" source="12449" target="12450" cy:directed="1"/>
      <edge id="15387" label="Q8BPN8 (pp) Q5SQX6" source="12447" target="12603" cy:directed="1"/>
      <edge id="15386" label="Q8BPN8 (pp) P12382" source="12447" target="12214" cy:directed="1"/>
      <edge id="15385" label="Q8BPN8 (pp) Q9Z1G3" source="12447" target="12224" cy:directed="1"/>
      <edge id="15384" label="Q8BPN8 (pp) P63318" source="12447" target="12666" cy:directed="1"/>
      <edge id="15383" label="Q8BPN8 (pp) Q9WUA3" source="12447" target="12510" cy:directed="1"/>
      <edge id="15382" label="Q8BPN8 (pp) P28660" source="12447" target="12382" cy:directed="1"/>
      <edge id="15381" label="Q8BPN8 (pp) P70404" source="12447" target="12294" cy:directed="1"/>
      <edge id="15380" label="P18572 (pp) O35465" source="12445" target="12446" cy:directed="1"/>
      <edge id="15379" label="P09671 (pp) Q99KI0" source="12444" target="12338" cy:directed="1"/>
      <edge id="15378" label="P09671 (pp) Q9WUM5" source="12444" target="12276" cy:directed="1"/>
      <edge id="15377" label="P09671 (pp) Q03265" source="12444" target="12212" cy:directed="1"/>
      <edge id="15376" label="P09671 (pp) Q9QUH0" source="12444" target="12426" cy:directed="1"/>
      <edge id="15375" label="P09671 (pp) Q9CQA3" source="12444" target="12312" cy:directed="1"/>
      <edge id="15374" label="P09671 (pp) Q9CR68" source="12444" target="12267" cy:directed="1"/>
      <edge id="15373" label="P09671 (pp) P20108" source="12444" target="12427" cy:directed="1"/>
      <edge id="15372" label="P09671 (pp) Q9DCJ5" source="12444" target="12380" cy:directed="1"/>
      <edge id="15371" label="P09671 (pp) P97807" source="12444" target="12340" cy:directed="1"/>
      <edge id="15370" label="P09671 (pp) Q8K3J1" source="12444" target="12404" cy:directed="1"/>
      <edge id="15369" label="P09671 (pp) P17751" source="12444" target="12297" cy:directed="1"/>
      <edge id="15368" label="P09671 (pp) Q9D6J5" source="12444" target="12487" cy:directed="1"/>
      <edge id="15367" label="P09671 (pp) Q80Y14" source="12444" target="12602" cy:directed="1"/>
      <edge id="15366" label="P09671 (pp) Q64521" source="12444" target="12425" cy:directed="1"/>
      <edge id="15365" label="P09671 (pp) Q9D0M3" source="12444" target="12250" cy:directed="1"/>
      <edge id="15364" label="P09671 (pp) Q99LX0" source="12444" target="12317" cy:directed="1"/>
      <edge id="15363" label="P09671 (pp) P52503" source="12444" target="12352" cy:directed="1"/>
      <edge id="15362" label="P09671 (pp) Q91YT0" source="12444" target="12379" cy:directed="1"/>
      <edge id="15361" label="P09671 (pp) Q9DCD0" source="12444" target="12222" cy:directed="1"/>
      <edge id="15360" label="P09671 (pp) Q9DC69" source="12444" target="12407" cy:directed="1"/>
      <edge id="15359" label="P09671 (pp) P08249" source="12444" target="12235" cy:directed="1"/>
      <edge id="15358" label="P09671 (pp) Q9DC70" source="12444" target="12272" cy:directed="1"/>
      <edge id="15357" label="P09671 (pp) P63038" source="12444" target="12247" cy:directed="1"/>
      <edge id="15356" label="P09671 (pp) Q9CXZ1" source="12444" target="12396" cy:directed="1"/>
      <edge id="15355" label="P09671 (pp) O70325" source="12444" target="12302" cy:directed="1"/>
      <edge id="15354" label="P09671 (pp) Q9CQQ7" source="12444" target="12409" cy:directed="1"/>
      <edge id="15353" label="P09671 (pp) P99029" source="12444" target="12356" cy:directed="1"/>
      <edge id="15352" label="P09671 (pp) P06745" source="12444" target="12464" cy:directed="1"/>
      <edge id="15351" label="P09671 (pp) Q9D2G2" source="12444" target="12287" cy:directed="1"/>
      <edge id="15350" label="P09671 (pp) Q9CPP6" source="12444" target="12281" cy:directed="1"/>
      <edge id="15349" label="P09671 (pp) Q9D6J6" source="12444" target="12207" cy:directed="1"/>
      <edge id="15348" label="P09671 (pp) Q91VD9" source="12444" target="12265" cy:directed="1"/>
      <edge id="15347" label="P09671 (pp) P09411" source="12444" target="12298" cy:directed="1"/>
      <edge id="15346" label="P09671 (pp) Q9CQH3" source="12444" target="12240" cy:directed="1"/>
      <edge id="15345" label="P16054 (pp) P05480" source="12443" target="12344" cy:directed="1"/>
      <edge id="15344" label="P16054 (pp) P67778" source="12443" target="12261" cy:directed="1"/>
      <edge id="15343" label="P16054 (pp) P17182" source="12443" target="12515" cy:directed="1"/>
      <edge id="15342" label="P16054 (pp) Q9CQA3" source="12443" target="12312" cy:directed="1"/>
      <edge id="15341" label="P16054 (pp) Q9CQ62" source="12443" target="12285" cy:directed="1"/>
      <edge id="15340" label="P16054 (pp) Q9CQR4" source="12443" target="12358" cy:directed="1"/>
      <edge id="15339" label="P16054 (pp) P35438" source="12443" target="12215" cy:directed="1"/>
      <edge id="15338" label="P16054 (pp) Q99JY0" source="12443" target="12384" cy:directed="1"/>
      <edge id="15337" label="P16054 (pp) Q9CR62" source="12443" target="12746" cy:directed="1"/>
      <edge id="15336" label="P16054 (pp) P23242" source="12443" target="12732" cy:directed="1"/>
      <edge id="15335" label="P16054 (pp) P63038" source="12443" target="12247" cy:directed="1"/>
      <edge id="15334" label="P16054 (pp) P48962" source="12443" target="12698" cy:directed="1"/>
      <edge id="15333" label="P16054 (pp) O35643" source="12443" target="12679" cy:directed="1"/>
      <edge id="15332" label="P16054 (pp) Q8BMS1" source="12443" target="12516" cy:directed="1"/>
      <edge id="15331" label="P16054 (pp) P16858" source="12443" target="12559" cy:directed="1"/>
      <edge id="15330" label="P16054 (pp) P47757" source="12443" target="12226" cy:directed="1"/>
      <edge id="15329" label="P62962 (pp) P60710" source="12442" target="12342" cy:directed="1"/>
      <edge id="15328" label="P62962 (pp) P99024" source="12442" target="12567" cy:directed="1"/>
      <edge id="15327" label="P62962 (pp) P39053" source="12442" target="12497" cy:directed="1"/>
      <edge id="15326" label="P62962 (pp) P59999" source="12442" target="12492" cy:directed="1"/>
      <edge id="15325" label="P62962 (pp) Q9JJV2" source="12442" target="12408" cy:directed="1"/>
      <edge id="15324" label="P22315 (pp) Q9Z1J3" source="12440" target="12543" cy:directed="1"/>
      <edge id="15323" label="P22315 (pp) P63038" source="12440" target="12247" cy:directed="1"/>
      <edge id="15322" label="P22315 (pp) Q61102" source="12440" target="12441" cy:directed="1"/>
      <edge id="15321" label="P35486 (pp) Q8BMF4" source="12439" target="12253" cy:directed="1"/>
      <edge id="15320" label="P35486 (pp) Q05920" source="12439" target="12254" cy:directed="1"/>
      <edge id="15319" label="P35486 (pp) P06151" source="12439" target="12238" cy:directed="1"/>
      <edge id="15318" label="P35486 (pp) P09411" source="12439" target="12298" cy:directed="1"/>
      <edge id="15317" label="P35486 (pp) Q9D2G2" source="12439" target="12287" cy:directed="1"/>
      <edge id="15316" label="P35486 (pp) Q922H2" source="12439" target="12691" cy:directed="1"/>
      <edge id="15315" label="P35486 (pp) Q9DC69" source="12439" target="12407" cy:directed="1"/>
      <edge id="15314" label="P35486 (pp) P52480" source="12439" target="12455" cy:directed="1"/>
      <edge id="15313" label="P35486 (pp) P06745" source="12439" target="12464" cy:directed="1"/>
      <edge id="15312" label="P35486 (pp) Q9WUM5" source="12439" target="12276" cy:directed="1"/>
      <edge id="15311" label="P47754 (pp) P62259" source="12437" target="12225" cy:directed="1"/>
      <edge id="15310" label="P47754 (pp) P47757" source="12437" target="12226" cy:directed="1"/>
      <edge id="15309" label="P47754 (pp) P63101" source="12437" target="12479" cy:directed="1"/>
      <edge id="15308" label="P47754 (pp) P16054" source="12437" target="12443" cy:directed="1"/>
      <edge id="15307" label="P14094 (pp) P04925" source="12436" target="12385" cy:directed="1"/>
      <edge id="15306" label="Q99JY9 (pp) Q9JM76" source="12435" target="12378" cy:directed="1"/>
      <edge id="15305" label="Q99JY9 (pp) P59999" source="12435" target="12492" cy:directed="1"/>
      <edge id="15304" label="Q99JY9 (pp) Q60598" source="12435" target="12548" cy:directed="1"/>
      <edge id="15303" label="Q99JY9 (pp) Q8VDN2" source="12435" target="12484" cy:directed="1"/>
      <edge id="15302" label="Q99JY9 (pp) P14094" source="12435" target="12436" cy:directed="1"/>
      <edge id="15301" label="Q99MN9 (pp) Q05920" source="12434" target="12254" cy:directed="1"/>
      <edge id="15300" label="Q99MN9 (pp) Q99JY0" source="12434" target="12384" cy:directed="1"/>
      <edge id="15299" label="Q99MN9 (pp) Q8BWT1" source="12434" target="12311" cy:directed="1"/>
      <edge id="15298" label="Q99MN9 (pp) Q9WUM5" source="12434" target="12276" cy:directed="1"/>
      <edge id="15297" label="Q99MN9 (pp) Q91ZA3" source="12434" target="12477" cy:directed="1"/>
      <edge id="15296" label="Q99MN9 (pp) Q9EQ20" source="12434" target="12362" cy:directed="1"/>
      <edge id="15295" label="Q99PT1 (pp) P84096" source="12433" target="12704" cy:directed="1"/>
      <edge id="15294" label="Q99PT1 (pp) P26040" source="12433" target="12469" cy:directed="1"/>
      <edge id="15293" label="Q99PT1 (pp) P62746" source="12433" target="12560" cy:directed="1"/>
      <edge id="15292" label="Q99PT1 (pp) P63001" source="12433" target="12398" cy:directed="1"/>
      <edge id="15291" label="Q99PT1 (pp) O35465" source="12433" target="12446" cy:directed="1"/>
      <edge id="15290" label="Q99PT1 (pp) P56480" source="12433" target="12258" cy:directed="1"/>
      <edge id="15289" label="O88935 (pp) P39053" source="12431" target="12497" cy:directed="1"/>
      <edge id="15288" label="P97450 (pp) Q9Z1P6" source="12430" target="12299" cy:directed="1"/>
      <edge id="15287" label="P97450 (pp) P48771" source="12430" target="12303" cy:directed="1"/>
      <edge id="15286" label="P97450 (pp) P19783" source="12430" target="12245" cy:directed="1"/>
      <edge id="15285" label="P97450 (pp) Q8K3J1" source="12430" target="12404" cy:directed="1"/>
      <edge id="15284" label="P97450 (pp) Q9CQQ7" source="12430" target="12409" cy:directed="1"/>
      <edge id="15283" label="P97450 (pp) Q99LX0" source="12430" target="12317" cy:directed="1"/>
      <edge id="15282" label="P97450 (pp) Q9DC69" source="12430" target="12407" cy:directed="1"/>
      <edge id="15281" label="P97450 (pp) Q9DB20" source="12430" target="12239" cy:directed="1"/>
      <edge id="15280" label="P97450 (pp) P56391" source="12430" target="12331" cy:directed="1"/>
      <edge id="15279" label="P97450 (pp) Q9DCJ5" source="12430" target="12380" cy:directed="1"/>
      <edge id="15278" label="P97450 (pp) Q9D023" source="12430" target="12416" cy:directed="1"/>
      <edge id="15277" label="P97450 (pp) Q91VD9" source="12430" target="12265" cy:directed="1"/>
      <edge id="15276" label="P97450 (pp) P56480" source="12430" target="12258" cy:directed="1"/>
      <edge id="15275" label="P97450 (pp) Q9CPP6" source="12430" target="12281" cy:directed="1"/>
      <edge id="15274" label="P97450 (pp) Q9CQ54" source="12430" target="12232" cy:directed="1"/>
      <edge id="15273" label="P97450 (pp) O09111" source="12430" target="12211" cy:directed="1"/>
      <edge id="15272" label="P97450 (pp) Q9CQ69" source="12430" target="12234" cy:directed="1"/>
      <edge id="15271" label="P97450 (pp) Q9CQH3" source="12430" target="12240" cy:directed="1"/>
      <edge id="15270" label="P97450 (pp) P19536" source="12430" target="12373" cy:directed="1"/>
      <edge id="15269" label="P97450 (pp) Q8VEM8" source="12430" target="12349" cy:directed="1"/>
      <edge id="15268" label="P97450 (pp) Q9CPQ8" source="12430" target="12264" cy:directed="1"/>
      <edge id="15267" label="P97450 (pp) Q9CR68" source="12430" target="12267" cy:directed="1"/>
      <edge id="15266" label="P97450 (pp) Q91YT0" source="12430" target="12379" cy:directed="1"/>
      <edge id="15265" label="P97450 (pp) Q3UIU2" source="12430" target="12288" cy:directed="1"/>
      <edge id="15264" label="P97450 (pp) Q9D6J5" source="12430" target="12487" cy:directed="1"/>
      <edge id="15263" label="P97450 (pp) Q99LC5" source="12430" target="12315" cy:directed="1"/>
      <edge id="15262" label="P97450 (pp) O88441" source="12430" target="12295" cy:directed="1"/>
      <edge id="15261" label="P97450 (pp) Q9WUM5" source="12430" target="12276" cy:directed="1"/>
      <edge id="15260" label="P97450 (pp) Q9D3D9" source="12430" target="12210" cy:directed="1"/>
      <edge id="15259" label="P97450 (pp) Q60931" source="12430" target="12556" cy:directed="1"/>
      <edge id="15258" label="P97450 (pp) Q9D6J6" source="12430" target="12207" cy:directed="1"/>
      <edge id="15257" label="P97450 (pp) O35658" source="12430" target="12364" cy:directed="1"/>
      <edge id="15256" label="P97450 (pp) Q91VR2" source="12430" target="12263" cy:directed="1"/>
      <edge id="15255" label="P97450 (pp) Q9DCX2" source="12430" target="12366" cy:directed="1"/>
      <edge id="15254" label="P97450 (pp) Q06185" source="12430" target="12271" cy:directed="1"/>
      <edge id="15253" label="P97450 (pp) Q9DB77" source="12430" target="12405" cy:directed="1"/>
      <edge id="15252" label="P97450 (pp) Q9ERS2" source="12430" target="12339" cy:directed="1"/>
      <edge id="15251" label="P97450 (pp) P03930" source="12430" target="12388" cy:directed="1"/>
      <edge id="15250" label="P97450 (pp) Q9CQZ6" source="12430" target="12231" cy:directed="1"/>
      <edge id="15249" label="P97450 (pp) Q03265" source="12430" target="12212" cy:directed="1"/>
      <edge id="15248" label="P97450 (pp) Q99LY9" source="12430" target="12252" cy:directed="1"/>
      <edge id="15247" label="P97450 (pp) Q9DCS9" source="12430" target="12266" cy:directed="1"/>
      <edge id="15246" label="P97450 (pp) Q91VM9" source="12430" target="12406" cy:directed="1"/>
      <edge id="15245" label="Q64010 (pp) P68510" source="12429" target="12213" cy:directed="1"/>
      <edge id="15244" label="Q64010 (pp) P68254" source="12429" target="12580" cy:directed="1"/>
      <edge id="15243" label="Q64010 (pp) P61982" source="12429" target="12509" cy:directed="1"/>
      <edge id="15242" label="Q64010 (pp) P62259" source="12429" target="12225" cy:directed="1"/>
      <edge id="15241" label="Q64010 (pp) P63101" source="12429" target="12479" cy:directed="1"/>
      <edge id="15240" label="Q64010 (pp) P05480" source="12429" target="12344" cy:directed="1"/>
      <edge id="15239" label="P20108 (pp) P63038" source="12427" target="12247" cy:directed="1"/>
      <edge id="15238" label="P20108 (pp) Q9WUM5" source="12427" target="12276" cy:directed="1"/>
      <edge id="15237" label="P20108 (pp) Q99LC5" source="12427" target="12315" cy:directed="1"/>
      <edge id="15236" label="P20108 (pp) Q9DB77" source="12427" target="12405" cy:directed="1"/>
      <edge id="15235" label="Q9QUH0 (pp) O70325" source="12426" target="12302" cy:directed="1"/>
      <edge id="15234" label="Q9QUH0 (pp) P99029" source="12426" target="12356" cy:directed="1"/>
      <edge id="15233" label="Q9QUH0 (pp) P20108" source="12426" target="12427" cy:directed="1"/>
      <edge id="15232" label="Q64521 (pp) Q3ULJ0" source="12425" target="12759" cy:directed="1"/>
      <edge id="15231" label="Q64521 (pp) Q64516" source="12425" target="12483" cy:directed="1"/>
      <edge id="15230" label="P13707 (pp) P17751" source="12424" target="12297" cy:directed="1"/>
      <edge id="15229" label="P13707 (pp) Q64516" source="12424" target="12483" cy:directed="1"/>
      <edge id="15228" label="P13707 (pp) Q64521" source="12424" target="12425" cy:directed="1"/>
      <edge id="15227" label="Q9R0K7 (pp) P04925" source="12423" target="12385" cy:directed="1"/>
      <edge id="15226" label="Q9R0K7 (pp) P12023" source="12423" target="12325" cy:directed="1"/>
      <edge id="15225" label="Q9D898 (pp) P59999" source="12421" target="12492" cy:directed="1"/>
      <edge id="15224" label="P63017 (pp) Q61699" source="12420" target="12718" cy:directed="1"/>
      <edge id="15223" label="P63017 (pp) Q9QYJ0" source="12420" target="12375" cy:directed="1"/>
      <edge id="15222" label="P63017 (pp) P10637" source="12420" target="12534" cy:directed="1"/>
      <edge id="15221" label="P63017 (pp) P07901" source="12420" target="12508" cy:directed="1"/>
      <edge id="15220" label="P63017 (pp) P62259" source="12420" target="12225" cy:directed="1"/>
      <edge id="15219" label="P63017 (pp) P11499" source="12420" target="12320" cy:directed="1"/>
      <edge id="15218" label="P63017 (pp) P63038" source="12420" target="12247" cy:directed="1"/>
      <edge id="15217" label="P63017 (pp) Q60864" source="12420" target="12374" cy:directed="1"/>
      <edge id="15216" label="P63017 (pp) P63037" source="12420" target="12279" cy:directed="1"/>
      <edge id="15215" label="Q61548 (pp) P17427" source="12418" target="12290" cy:directed="1"/>
      <edge id="15214" label="P12367 (pp) D3YVF0" source="12417" target="12790" cy:directed="1"/>
      <edge id="15213" label="P12367 (pp) Q8BR92" source="12417" target="12500" cy:directed="1"/>
      <edge id="15212" label="Q9D023 (pp) Q9CQH3" source="12416" target="12240" cy:directed="1"/>
      <edge id="15211" label="Q9D023 (pp) Q9D6J6" source="12416" target="12207" cy:directed="1"/>
      <edge id="15210" label="Q9D023 (pp) Q99LC5" source="12416" target="12315" cy:directed="1"/>
      <edge id="15209" label="P56379 (pp) Q9DB20" source="12415" target="12239" cy:directed="1"/>
      <edge id="15208" label="P56379 (pp) Q9CPQ8" source="12415" target="12264" cy:directed="1"/>
      <edge id="15207" label="P56379 (pp) Q9CQZ6" source="12415" target="12231" cy:directed="1"/>
      <edge id="15206" label="P56379 (pp) P97450" source="12415" target="12430" cy:directed="1"/>
      <edge id="15205" label="P56379 (pp) Q9D855" source="12415" target="12403" cy:directed="1"/>
      <edge id="15204" label="P56379 (pp) P52503" source="12415" target="12352" cy:directed="1"/>
      <edge id="15203" label="P56379 (pp) Q9CQZ5" source="12415" target="12206" cy:directed="1"/>
      <edge id="15202" label="P56379 (pp) P48771" source="12415" target="12303" cy:directed="1"/>
      <edge id="15201" label="P56379 (pp) Q9CQ69" source="12415" target="12234" cy:directed="1"/>
      <edge id="15200" label="P56379 (pp) Q9Z1P6" source="12415" target="12299" cy:directed="1"/>
      <edge id="15199" label="P56379 (pp) Q06185" source="12415" target="12271" cy:directed="1"/>
      <edge id="15198" label="P56379 (pp) Q9CQH3" source="12415" target="12240" cy:directed="1"/>
      <edge id="15197" label="P18052 (pp) P05480" source="12414" target="12344" cy:directed="1"/>
      <edge id="15196" label="P18052 (pp) P43406" source="12414" target="12696" cy:directed="1"/>
      <edge id="15195" label="P70232 (pp) P18052" source="12413" target="12414" cy:directed="1"/>
      <edge id="15194" label="Q9CZS1 (pp) P61922" source="12412" target="12324" cy:directed="1"/>
      <edge id="15193" label="Q9CZS1 (pp) Q8CHT0" source="12412" target="12502" cy:directed="1"/>
      <edge id="15192" label="Q9CZS1 (pp) Q9EQ20" source="12412" target="12362" cy:directed="1"/>
      <edge id="15191" label="O35129 (pp) O35658" source="12411" target="12364" cy:directed="1"/>
      <edge id="15190" label="O35129 (pp) P63038" source="12411" target="12247" cy:directed="1"/>
      <edge id="15189" label="O35129 (pp) Q9D0M3" source="12411" target="12250" cy:directed="1"/>
      <edge id="15188" label="O35129 (pp) Q99LX0" source="12411" target="12317" cy:directed="1"/>
      <edge id="15187" label="O35129 (pp) P67778" source="12411" target="12261" cy:directed="1"/>
      <edge id="15186" label="O35129 (pp) Q9DCT2" source="12411" target="12233" cy:directed="1"/>
      <edge id="15185" label="O35129 (pp) Q9CZ13" source="12411" target="12249" cy:directed="1"/>
      <edge id="15184" label="O35129 (pp) Q8BGH2" source="12411" target="12316" cy:directed="1"/>
      <edge id="15183" label="O35129 (pp) P62073" source="12411" target="12355" cy:directed="1"/>
      <edge id="15182" label="O88696 (pp) Q9CQA3" source="12410" target="12312" cy:directed="1"/>
      <edge id="15181" label="O88696 (pp) Q8K3J1" source="12410" target="12404" cy:directed="1"/>
      <edge id="15180" label="O88696 (pp) P97807" source="12410" target="12340" cy:directed="1"/>
      <edge id="15179" label="O88696 (pp) P56480" source="12410" target="12258" cy:directed="1"/>
      <edge id="15178" label="O88696 (pp) Q9CZ13" source="12410" target="12249" cy:directed="1"/>
      <edge id="15177" label="O88696 (pp) Q99LX0" source="12410" target="12317" cy:directed="1"/>
      <edge id="15176" label="O88696 (pp) Q9Z1P6" source="12410" target="12299" cy:directed="1"/>
      <edge id="15175" label="O88696 (pp) P67778" source="12410" target="12261" cy:directed="1"/>
      <edge id="15174" label="O88696 (pp) Q9DCT2" source="12410" target="12233" cy:directed="1"/>
      <edge id="15173" label="O88696 (pp) Q8CGK3" source="12410" target="12758" cy:directed="1"/>
      <edge id="15172" label="O88696 (pp) P17751" source="12410" target="12297" cy:directed="1"/>
      <edge id="15171" label="O88696 (pp) Q91Z53" source="12410" target="12335" cy:directed="1"/>
      <edge id="15170" label="O88696 (pp) P52503" source="12410" target="12352" cy:directed="1"/>
      <edge id="15169" label="O88696 (pp) O08756" source="12410" target="12383" cy:directed="1"/>
      <edge id="15168" label="O88696 (pp) Q91YT0" source="12410" target="12379" cy:directed="1"/>
      <edge id="15167" label="O88696 (pp) P42125" source="12410" target="12519" cy:directed="1"/>
      <edge id="15166" label="O88696 (pp) Q8BGH2" source="12410" target="12316" cy:directed="1"/>
      <edge id="15165" label="O88696 (pp) Q9DC70" source="12410" target="12272" cy:directed="1"/>
      <edge id="15164" label="O88696 (pp) Q9D3D9" source="12410" target="12210" cy:directed="1"/>
      <edge id="15163" label="O88696 (pp) Q9D6J6" source="12410" target="12207" cy:directed="1"/>
      <edge id="15162" label="O88696 (pp) P63038" source="12410" target="12247" cy:directed="1"/>
      <edge id="15161" label="O88696 (pp) Q9DB20" source="12410" target="12239" cy:directed="1"/>
      <edge id="15160" label="O88696 (pp) Q9D0M3" source="12410" target="12250" cy:directed="1"/>
      <edge id="15159" label="O88696 (pp) O35129" source="12410" target="12411" cy:directed="1"/>
      <edge id="15158" label="Q9CQQ7 (pp) Q9D3D9" source="12409" target="12210" cy:directed="1"/>
      <edge id="15157" label="Q9CQQ7 (pp) Q9ERS2" source="12409" target="12339" cy:directed="1"/>
      <edge id="15156" label="Q9CQQ7 (pp) Q9D6J6" source="12409" target="12207" cy:directed="1"/>
      <edge id="15155" label="Q9CQQ7 (pp) Q3UIU2" source="12409" target="12288" cy:directed="1"/>
      <edge id="15154" label="Q9CQQ7 (pp) Q91VR2" source="12409" target="12263" cy:directed="1"/>
      <edge id="15153" label="Q9CQQ7 (pp) Q99LY9" source="12409" target="12252" cy:directed="1"/>
      <edge id="15152" label="Q9CQQ7 (pp) Q9CQH3" source="12409" target="12240" cy:directed="1"/>
      <edge id="15151" label="Q9JJV2 (pp) O88935" source="12408" target="12431" cy:directed="1"/>
      <edge id="15150" label="Q9JJV2 (pp) P39053" source="12408" target="12497" cy:directed="1"/>
      <edge id="15149" label="Q9JJV2 (pp) Q9QXS6" source="12408" target="12539" cy:directed="1"/>
      <edge id="15148" label="Q9JJV2 (pp) P60710" source="12408" target="12342" cy:directed="1"/>
      <edge id="15147" label="Q9DC69 (pp) Q9ERS2" source="12407" target="12339" cy:directed="1"/>
      <edge id="15146" label="Q9DC69 (pp) Q99LX0" source="12407" target="12317" cy:directed="1"/>
      <edge id="15145" label="Q9DC69 (pp) Q9CQH3" source="12407" target="12240" cy:directed="1"/>
      <edge id="15144" label="Q9DC69 (pp) Q9DCX2" source="12407" target="12366" cy:directed="1"/>
      <edge id="15143" label="Q9DC69 (pp) Q9D6J6" source="12407" target="12207" cy:directed="1"/>
      <edge id="15142" label="Q9DC69 (pp) P99029" source="12407" target="12356" cy:directed="1"/>
      <edge id="15141" label="Q9DC69 (pp) Q9D3D9" source="12407" target="12210" cy:directed="1"/>
      <edge id="15140" label="Q9DC69 (pp) Q9CQQ7" source="12407" target="12409" cy:directed="1"/>
      <edge id="15139" label="Q9DC69 (pp) O09111" source="12407" target="12211" cy:directed="1"/>
      <edge id="15138" label="Q9DC69 (pp) Q91VR2" source="12407" target="12263" cy:directed="1"/>
      <edge id="15137" label="Q91VM9 (pp) Q99LC5" source="12406" target="12315" cy:directed="1"/>
      <edge id="15136" label="Q91VM9 (pp) P63082" source="12406" target="12448" cy:directed="1"/>
      <edge id="15135" label="Q91VM9 (pp) Q9CQQ7" source="12406" target="12409" cy:directed="1"/>
      <edge id="15134" label="Q9DB77 (pp) P00405" source="12405" target="12669" cy:directed="1"/>
      <edge id="15133" label="Q9DB77 (pp) Q8VEM8" source="12405" target="12349" cy:directed="1"/>
      <edge id="15132" label="Q9DB77 (pp) Q9D6J6" source="12405" target="12207" cy:directed="1"/>
      <edge id="15131" label="Q9DB77 (pp) Q9ERS2" source="12405" target="12339" cy:directed="1"/>
      <edge id="15130" label="Q9DB77 (pp) Q99LY9" source="12405" target="12252" cy:directed="1"/>
      <edge id="15129" label="Q9DB77 (pp) Q9DCX2" source="12405" target="12366" cy:directed="1"/>
      <edge id="15128" label="Q9DB77 (pp) Q9CQQ7" source="12405" target="12409" cy:directed="1"/>
      <edge id="15127" label="Q9DB77 (pp) Q9DCS9" source="12405" target="12266" cy:directed="1"/>
      <edge id="15126" label="Q9DB77 (pp) Q9DCJ5" source="12405" target="12380" cy:directed="1"/>
      <edge id="15125" label="Q9DB77 (pp) Q9CR68" source="12405" target="12267" cy:directed="1"/>
      <edge id="15124" label="Q9DB77 (pp) O09111" source="12405" target="12211" cy:directed="1"/>
      <edge id="15123" label="Q9DB77 (pp) Q99P72" source="12405" target="12678" cy:directed="1"/>
      <edge id="15122" label="Q9DB77 (pp) Q3UIU2" source="12405" target="12288" cy:directed="1"/>
      <edge id="15121" label="Q9DB77 (pp) Q99JY0" source="12405" target="12384" cy:directed="1"/>
      <edge id="15120" label="Q9DB77 (pp) Q91VR2" source="12405" target="12263" cy:directed="1"/>
      <edge id="15119" label="Q9DB77 (pp) Q99LC5" source="12405" target="12315" cy:directed="1"/>
      <edge id="15118" label="Q9DB77 (pp) P19783" source="12405" target="12245" cy:directed="1"/>
      <edge id="15117" label="Q9DB77 (pp) P68510" source="12405" target="12213" cy:directed="1"/>
      <edge id="15116" label="Q9DB77 (pp) Q9CQ69" source="12405" target="12234" cy:directed="1"/>
      <edge id="15115" label="Q9DB77 (pp) Q9WUM5" source="12405" target="12276" cy:directed="1"/>
      <edge id="15114" label="Q9DB77 (pp) Q9DC69" source="12405" target="12407" cy:directed="1"/>
      <edge id="15113" label="Q9DB77 (pp) Q91YT0" source="12405" target="12379" cy:directed="1"/>
      <edge id="15112" label="Q9DB77 (pp) Q9CQH3" source="12405" target="12240" cy:directed="1"/>
      <edge id="15111" label="Q8K3J1 (pp) Q91VR2" source="12404" target="12263" cy:directed="1"/>
      <edge id="15110" label="Q8K3J1 (pp) Q9D6J6" source="12404" target="12207" cy:directed="1"/>
      <edge id="15109" label="Q8K3J1 (pp) Q9DC69" source="12404" target="12407" cy:directed="1"/>
      <edge id="15108" label="Q8K3J1 (pp) P56391" source="12404" target="12331" cy:directed="1"/>
      <edge id="15107" label="Q8K3J1 (pp) Q9DCX2" source="12404" target="12366" cy:directed="1"/>
      <edge id="15106" label="Q8K3J1 (pp) Q9CQH3" source="12404" target="12240" cy:directed="1"/>
      <edge id="15105" label="Q8K3J1 (pp) Q9CQQ7" source="12404" target="12409" cy:directed="1"/>
      <edge id="15104" label="Q8K3J1 (pp) Q9ERS2" source="12404" target="12339" cy:directed="1"/>
      <edge id="15103" label="Q8K3J1 (pp) Q9D3D9" source="12404" target="12210" cy:directed="1"/>
      <edge id="15102" label="Q8K3J1 (pp) O09111" source="12404" target="12211" cy:directed="1"/>
      <edge id="15101" label="Q8K3J1 (pp) Q99LX0" source="12404" target="12317" cy:directed="1"/>
      <edge id="15100" label="Q8K3J1 (pp) Q3UIU2" source="12404" target="12288" cy:directed="1"/>
      <edge id="15099" label="Q9D855 (pp) Q9CQH3" source="12403" target="12240" cy:directed="1"/>
      <edge id="15098" label="Q9D855 (pp) Q03265" source="12403" target="12212" cy:directed="1"/>
      <edge id="15097" label="Q9D855 (pp) P43024" source="12403" target="12472" cy:directed="1"/>
      <edge id="15096" label="Q9D855 (pp) Q91YT0" source="12403" target="12379" cy:directed="1"/>
      <edge id="15095" label="Q9D855 (pp) Q8K2B3" source="12403" target="12347" cy:directed="1"/>
      <edge id="15094" label="Q9D855 (pp) Q9ERS2" source="12403" target="12339" cy:directed="1"/>
      <edge id="15093" label="Q9D855 (pp) Q9CQQ7" source="12403" target="12409" cy:directed="1"/>
      <edge id="15092" label="Q9D855 (pp) Q9CZ13" source="12403" target="12249" cy:directed="1"/>
      <edge id="15091" label="Q9D855 (pp) P97450" source="12403" target="12430" cy:directed="1"/>
      <edge id="15090" label="Q9D855 (pp) Q9D0M3" source="12403" target="12250" cy:directed="1"/>
      <edge id="15089" label="Q9D855 (pp) Q91VD9" source="12403" target="12265" cy:directed="1"/>
      <edge id="15088" label="Q9D855 (pp) Q9DCJ5" source="12403" target="12380" cy:directed="1"/>
      <edge id="15087" label="Q9D855 (pp) Q99LY9" source="12403" target="12252" cy:directed="1"/>
      <edge id="15086" label="Q9D855 (pp) Q9CR68" source="12403" target="12267" cy:directed="1"/>
      <edge id="15085" label="Q9D855 (pp) Q9DB20" source="12403" target="12239" cy:directed="1"/>
      <edge id="15084" label="Q9D855 (pp) Q9DC69" source="12403" target="12407" cy:directed="1"/>
      <edge id="15083" label="Q9D855 (pp) Q9DB77" source="12403" target="12405" cy:directed="1"/>
      <edge id="15082" label="Q9D855 (pp) Q9CPP6" source="12403" target="12281" cy:directed="1"/>
      <edge id="15081" label="Q9D855 (pp) P56391" source="12403" target="12331" cy:directed="1"/>
      <edge id="15080" label="Q9D855 (pp) Q06185" source="12403" target="12271" cy:directed="1"/>
      <edge id="15079" label="Q9D855 (pp) Q9CQZ6" source="12403" target="12231" cy:directed="1"/>
      <edge id="15078" label="Q9D855 (pp) Q9D023" source="12403" target="12416" cy:directed="1"/>
      <edge id="15077" label="Q9D855 (pp) Q9DCS9" source="12403" target="12266" cy:directed="1"/>
      <edge id="15076" label="Q9D855 (pp) P97807" source="12403" target="12340" cy:directed="1"/>
      <edge id="15075" label="Q9D855 (pp) P52503" source="12403" target="12352" cy:directed="1"/>
      <edge id="15074" label="Q9D855 (pp) Q3UIU2" source="12403" target="12288" cy:directed="1"/>
      <edge id="15073" label="Q9D855 (pp) Q9CQ69" source="12403" target="12234" cy:directed="1"/>
      <edge id="15072" label="Q9D855 (pp) Q9D6J6" source="12403" target="12207" cy:directed="1"/>
      <edge id="15071" label="Q9D855 (pp) Q9CQJ8" source="12403" target="12270" cy:directed="1"/>
      <edge id="15070" label="Q9D855 (pp) Q9D3D9" source="12403" target="12210" cy:directed="1"/>
      <edge id="15069" label="Q9D855 (pp) Q9CQZ5" source="12403" target="12206" cy:directed="1"/>
      <edge id="15068" label="Q9D855 (pp) Q91VR2" source="12403" target="12263" cy:directed="1"/>
      <edge id="15067" label="Q9D855 (pp) Q9DCX2" source="12403" target="12366" cy:directed="1"/>
      <edge id="15066" label="Q9D855 (pp) Q8K3J1" source="12403" target="12404" cy:directed="1"/>
      <edge id="15065" label="Q9JHU4 (pp) Q8BPN8" source="12402" target="12447" cy:directed="1"/>
      <edge id="15064" label="Q9JHU4 (pp) P63005" source="12402" target="12306" cy:directed="1"/>
      <edge id="15063" label="Q9JHU4 (pp) P07901" source="12402" target="12508" cy:directed="1"/>
      <edge id="15062" label="Q9JHU4 (pp) O08788" source="12402" target="12337" cy:directed="1"/>
      <edge id="15061" label="Q9JHU4 (pp) P68369" source="12402" target="12348" cy:directed="1"/>
      <edge id="15060" label="Q9JHU4 (pp) P63101" source="12402" target="12479" cy:directed="1"/>
      <edge id="15059" label="Q9JHU4 (pp) P68368" source="12402" target="12532" cy:directed="1"/>
      <edge id="15058" label="Q9JHU4 (pp) Q9DC28" source="12402" target="12652" cy:directed="1"/>
      <edge id="15057" label="Q9JHU4 (pp) Q99KJ8" source="12402" target="12336" cy:directed="1"/>
      <edge id="15056" label="Q9JHU4 (pp) Q60996" source="12402" target="12586" cy:directed="1"/>
      <edge id="15055" label="P46660 (pp) P19246" source="12401" target="12658" cy:directed="1"/>
      <edge id="15054" label="P46660 (pp) P35438" source="12401" target="12215" cy:directed="1"/>
      <edge id="15053" label="P63044 (pp) P35802" source="12400" target="12806" cy:directed="1"/>
      <edge id="15052" label="P63044 (pp) P51863" source="12400" target="12223" cy:directed="1"/>
      <edge id="15051" label="P63044 (pp) P18872" source="12400" target="12390" cy:directed="1"/>
      <edge id="15050" label="P63044 (pp) Q6PIE5" source="12400" target="12574" cy:directed="1"/>
      <edge id="15049" label="P63044 (pp) O35526" source="12400" target="12329" cy:directed="1"/>
      <edge id="15048" label="P63044 (pp) P62874" source="12400" target="12361" cy:directed="1"/>
      <edge id="15047" label="P63044 (pp) Q99LX0" source="12400" target="12317" cy:directed="1"/>
      <edge id="15046" label="P63044 (pp) P39053" source="12400" target="12497" cy:directed="1"/>
      <edge id="15045" label="P63044 (pp) Q6PIC6" source="12400" target="12633" cy:directed="1"/>
      <edge id="15044" label="P63044 (pp) P28663" source="12400" target="12630" cy:directed="1"/>
      <edge id="15043" label="P63044 (pp) O55042" source="12400" target="12616" cy:directed="1"/>
      <edge id="15042" label="P63044 (pp) P60766" source="12400" target="12527" cy:directed="1"/>
      <edge id="15041" label="Q62351 (pp) Q68FD5" source="12399" target="12376" cy:directed="1"/>
      <edge id="15040" label="Q62351 (pp) Q91VZ6" source="12399" target="12638" cy:directed="1"/>
      <edge id="15039" label="P63001 (pp) P35438" source="12398" target="12215" cy:directed="1"/>
      <edge id="15038" label="P63001 (pp) P60766" source="12398" target="12527" cy:directed="1"/>
      <edge id="15037" label="P63001 (pp) Q5FWK3" source="12398" target="12490" cy:directed="1"/>
      <edge id="15036" label="Q8BG51 (pp) P84096" source="12397" target="12704" cy:directed="1"/>
      <edge id="15035" label="Q8BG51 (pp) Q5FWK3" source="12397" target="12490" cy:directed="1"/>
      <edge id="15034" label="Q8BG51 (pp) P63001" source="12397" target="12398" cy:directed="1"/>
      <edge id="15033" label="Q9CXZ1 (pp) Q9D6J6" source="12396" target="12207" cy:directed="1"/>
      <edge id="15032" label="Q9CXZ1 (pp) Q91VD9" source="12396" target="12265" cy:directed="1"/>
      <edge id="15031" label="Q9CXZ1 (pp) Q9DC69" source="12396" target="12407" cy:directed="1"/>
      <edge id="15030" label="Q9CXZ1 (pp) Q9DCS9" source="12396" target="12266" cy:directed="1"/>
      <edge id="15029" label="Q9CXZ1 (pp) Q9CQ69" source="12396" target="12234" cy:directed="1"/>
      <edge id="15028" label="Q9CXZ1 (pp) Q8K3J1" source="12396" target="12404" cy:directed="1"/>
      <edge id="15027" label="Q9CXZ1 (pp) Q9ERS2" source="12396" target="12339" cy:directed="1"/>
      <edge id="15026" label="Q9CXZ1 (pp) Q3UIU2" source="12396" target="12288" cy:directed="1"/>
      <edge id="15025" label="Q9CXZ1 (pp) O09111" source="12396" target="12211" cy:directed="1"/>
      <edge id="15024" label="Q9CXZ1 (pp) Q9D0M3" source="12396" target="12250" cy:directed="1"/>
      <edge id="15023" label="Q9CXZ1 (pp) Q9Z1P6" source="12396" target="12299" cy:directed="1"/>
      <edge id="15022" label="Q9CXZ1 (pp) Q9CQJ8" source="12396" target="12270" cy:directed="1"/>
      <edge id="15021" label="Q9CXZ1 (pp) Q62425" source="12396" target="12545" cy:directed="1"/>
      <edge id="15020" label="Q9CXZ1 (pp) Q91YT0" source="12396" target="12379" cy:directed="1"/>
      <edge id="15019" label="Q9CXZ1 (pp) Q9CR68" source="12396" target="12267" cy:directed="1"/>
      <edge id="15018" label="Q9CXZ1 (pp) Q99LY9" source="12396" target="12252" cy:directed="1"/>
      <edge id="15017" label="Q9CXZ1 (pp) Q9DCJ5" source="12396" target="12380" cy:directed="1"/>
      <edge id="15016" label="Q9CXZ1 (pp) Q9CQQ7" source="12396" target="12409" cy:directed="1"/>
      <edge id="15015" label="Q9CXZ1 (pp) Q9CQH3" source="12396" target="12240" cy:directed="1"/>
      <edge id="15014" label="Q9CXZ1 (pp) Q9D6J5" source="12396" target="12487" cy:directed="1"/>
      <edge id="15013" label="Q9CXZ1 (pp) P97450" source="12396" target="12430" cy:directed="1"/>
      <edge id="15012" label="Q9CXZ1 (pp) Q9DB77" source="12396" target="12405" cy:directed="1"/>
      <edge id="15011" label="Q9CXZ1 (pp) Q9CQZ6" source="12396" target="12231" cy:directed="1"/>
      <edge id="15010" label="Q9CXZ1 (pp) Q9CQ54" source="12396" target="12232" cy:directed="1"/>
      <edge id="15009" label="Q9CXZ1 (pp) Q99LC3" source="12396" target="12251" cy:directed="1"/>
      <edge id="15008" label="Q9CXZ1 (pp) Q9CQC7" source="12396" target="12494" cy:directed="1"/>
      <edge id="15007" label="Q9CXZ1 (pp) Q9CQZ5" source="12396" target="12206" cy:directed="1"/>
      <edge id="15006" label="Q9CXZ1 (pp) Q9CPP6" source="12396" target="12281" cy:directed="1"/>
      <edge id="15005" label="Q60676 (pp) P35438" source="12395" target="12215" cy:directed="1"/>
      <edge id="15004" label="Q60676 (pp) P63330" source="12395" target="12229" cy:directed="1"/>
      <edge id="15003" label="Q8JZN5 (pp) Q61425" source="12394" target="12314" cy:directed="1"/>
      <edge id="15002" label="Q8JZN5 (pp) Q8BMS1" source="12394" target="12516" cy:directed="1"/>
      <edge id="15001" label="Q8JZN5 (pp) Q99LC5" source="12394" target="12315" cy:directed="1"/>
      <edge id="15000" label="Q8JZQ2 (pp) P63038" source="12393" target="12247" cy:directed="1"/>
      <edge id="14999" label="Q8JZQ2 (pp) P00493" source="12393" target="12600" cy:directed="1"/>
      <edge id="14998" label="Q8JZQ2 (pp) Q68FF6" source="12393" target="12583" cy:directed="1"/>
      <edge id="14997" label="P51174 (pp) Q99LC5" source="12392" target="12315" cy:directed="1"/>
      <edge id="14996" label="P51174 (pp) Q8BMS1" source="12392" target="12516" cy:directed="1"/>
      <edge id="14995" label="P51174 (pp) Q91WC3" source="12392" target="12622" cy:directed="1"/>
      <edge id="14994" label="P51174 (pp) Q8BWT1" source="12392" target="12311" cy:directed="1"/>
      <edge id="14993" label="P51174 (pp) Q921G7" source="12392" target="12310" cy:directed="1"/>
      <edge id="14992" label="P51174 (pp) P41216" source="12392" target="12628" cy:directed="1"/>
      <edge id="14991" label="P51174 (pp) Q61425" source="12392" target="12314" cy:directed="1"/>
      <edge id="14990" label="P51174 (pp) Q8BGD5" source="12392" target="12518" cy:directed="1"/>
      <edge id="14989" label="P51174 (pp) Q99JY0" source="12392" target="12384" cy:directed="1"/>
      <edge id="14988" label="Q8VDD5 (pp) P35438" source="12391" target="12215" cy:directed="1"/>
      <edge id="14987" label="Q8VDD5 (pp) P63101" source="12391" target="12479" cy:directed="1"/>
      <edge id="14986" label="Q8VDD5 (pp) Q01097" source="12391" target="12204" cy:directed="1"/>
      <edge id="14985" label="P18872 (pp) P12023" source="12390" target="12325" cy:directed="1"/>
      <edge id="14984" label="P18872 (pp) P62874" source="12390" target="12361" cy:directed="1"/>
      <edge id="14983" label="P18872 (pp) P06151" source="12390" target="12238" cy:directed="1"/>
      <edge id="14982" label="Q9CQ75 (pp) Q9CPP6" source="12389" target="12281" cy:directed="1"/>
      <edge id="14981" label="Q9CQ75 (pp) Q91VD9" source="12389" target="12265" cy:directed="1"/>
      <edge id="14980" label="Q9CQ75 (pp) Q9CQJ8" source="12389" target="12270" cy:directed="1"/>
      <edge id="14979" label="Q9CQ75 (pp) Q8K3J1" source="12389" target="12404" cy:directed="1"/>
      <edge id="14978" label="Q9CQ75 (pp) Q9CQZ5" source="12389" target="12206" cy:directed="1"/>
      <edge id="14977" label="Q9CQ75 (pp) Q9DC69" source="12389" target="12407" cy:directed="1"/>
      <edge id="14976" label="Q9CQ75 (pp) Q9CPQ1" source="12389" target="12604" cy:directed="1"/>
      <edge id="14975" label="Q9CQ75 (pp) Q9D3D9" source="12389" target="12210" cy:directed="1"/>
      <edge id="14974" label="Q9CQ75 (pp) Q9D6J6" source="12389" target="12207" cy:directed="1"/>
      <edge id="14973" label="Q9CQ75 (pp) Q9CXZ1" source="12389" target="12396" cy:directed="1"/>
      <edge id="14972" label="Q9CQ75 (pp) Q7TMF3" source="12389" target="12365" cy:directed="1"/>
      <edge id="14971" label="Q9CQ75 (pp) Q9D6J5" source="12389" target="12487" cy:directed="1"/>
      <edge id="14970" label="Q9CQ75 (pp) Q99LC3" source="12389" target="12251" cy:directed="1"/>
      <edge id="14969" label="Q9CQ75 (pp) Q3UIU2" source="12389" target="12288" cy:directed="1"/>
      <edge id="14968" label="Q9CQ75 (pp) Q9CR68" source="12389" target="12267" cy:directed="1"/>
      <edge id="14967" label="Q9CQ75 (pp) Q9ERS2" source="12389" target="12339" cy:directed="1"/>
      <edge id="14966" label="Q9CQ75 (pp) P43024" source="12389" target="12472" cy:directed="1"/>
      <edge id="14965" label="Q9CQ75 (pp) Q62425" source="12389" target="12545" cy:directed="1"/>
      <edge id="14964" label="Q9CQ75 (pp) Q9CQH3" source="12389" target="12240" cy:directed="1"/>
      <edge id="14963" label="Q9CQ75 (pp) Q9D0M3" source="12389" target="12250" cy:directed="1"/>
      <edge id="14962" label="Q9CQ75 (pp) Q9Z1P6" source="12389" target="12299" cy:directed="1"/>
      <edge id="14961" label="Q9CQ75 (pp) P56391" source="12389" target="12331" cy:directed="1"/>
      <edge id="14960" label="Q9CQ75 (pp) Q9CQ69" source="12389" target="12234" cy:directed="1"/>
      <edge id="14959" label="Q9CQ75 (pp) Q9DCX2" source="12389" target="12366" cy:directed="1"/>
      <edge id="14958" label="Q9CQ75 (pp) Q9CQZ6" source="12389" target="12231" cy:directed="1"/>
      <edge id="14957" label="Q9CQ75 (pp) Q99LY9" source="12389" target="12252" cy:directed="1"/>
      <edge id="14956" label="Q9CQ75 (pp) Q9DCJ5" source="12389" target="12380" cy:directed="1"/>
      <edge id="14955" label="Q9CQ75 (pp) Q9CQ54" source="12389" target="12232" cy:directed="1"/>
      <edge id="14954" label="Q9CQ75 (pp) Q9CQC7" source="12389" target="12494" cy:directed="1"/>
      <edge id="14953" label="Q9CQ75 (pp) O09111" source="12389" target="12211" cy:directed="1"/>
      <edge id="14952" label="Q9CQ75 (pp) Q9DCS9" source="12389" target="12266" cy:directed="1"/>
      <edge id="14951" label="Q9CQ75 (pp) P97450" source="12389" target="12430" cy:directed="1"/>
      <edge id="14950" label="Q9CQ75 (pp) Q9D855" source="12389" target="12403" cy:directed="1"/>
      <edge id="14949" label="Q9CQ75 (pp) Q9DB20" source="12389" target="12239" cy:directed="1"/>
      <edge id="14948" label="Q9CQ75 (pp) Q91YT0" source="12389" target="12379" cy:directed="1"/>
      <edge id="14947" label="Q9CQ75 (pp) P52503" source="12389" target="12352" cy:directed="1"/>
      <edge id="14946" label="Q9CQ75 (pp) Q9DC70" source="12389" target="12272" cy:directed="1"/>
      <edge id="14945" label="P03930 (pp) Q9CQQ7" source="12388" target="12409" cy:directed="1"/>
      <edge id="14944" label="P03930 (pp) Q91VR2" source="12388" target="12263" cy:directed="1"/>
      <edge id="14943" label="P03930 (pp) Q9D3D9" source="12388" target="12210" cy:directed="1"/>
      <edge id="14942" label="P49615 (pp) P19246" source="12387" target="12658" cy:directed="1"/>
      <edge id="14941" label="P39688 (pp) Q60631" source="12386" target="12353" cy:directed="1"/>
      <edge id="14940" label="P39688 (pp) P30999" source="12386" target="12584" cy:directed="1"/>
      <edge id="14939" label="P39688 (pp) P18052" source="12386" target="12414" cy:directed="1"/>
      <edge id="14938" label="P39688 (pp) P49615" source="12386" target="12387" cy:directed="1"/>
      <edge id="14937" label="P04925 (pp) P62259" source="12385" target="12225" cy:directed="1"/>
      <edge id="14936" label="P04925 (pp) O35136" source="12385" target="12721" cy:directed="1"/>
      <edge id="14935" label="P04925 (pp) P11627" source="12385" target="12561" cy:directed="1"/>
      <edge id="14934" label="P04925 (pp) O08599" source="12385" target="12674" cy:directed="1"/>
      <edge id="14933" label="P04925 (pp) P63101" source="12385" target="12479" cy:directed="1"/>
      <edge id="14932" label="P04925 (pp) O88935" source="12385" target="12431" cy:directed="1"/>
      <edge id="14931" label="P04925 (pp) Q99PJ0" source="12385" target="12626" cy:directed="1"/>
      <edge id="14930" label="P04925 (pp) Q99N28" source="12385" target="12372" cy:directed="1"/>
      <edge id="14929" label="P04925 (pp) Q9Z218" source="12385" target="12568" cy:directed="1"/>
      <edge id="14928" label="P04925 (pp) Q8VDN2" source="12385" target="12484" cy:directed="1"/>
      <edge id="14927" label="Q99JY0 (pp) Q8BMS1" source="12384" target="12516" cy:directed="1"/>
      <edge id="14926" label="Q99JY0 (pp) Q9DBL1" source="12384" target="12451" cy:directed="1"/>
      <edge id="14925" label="O08756 (pp) Q8BMS1" source="12383" target="12516" cy:directed="1"/>
      <edge id="14924" label="O08756 (pp) Q9CQH3" source="12383" target="12240" cy:directed="1"/>
      <edge id="14923" label="O08756 (pp) O09111" source="12383" target="12211" cy:directed="1"/>
      <edge id="14922" label="O08756 (pp) Q99JY0" source="12383" target="12384" cy:directed="1"/>
      <edge id="14921" label="P28660 (pp) Q9JJV2" source="12382" target="12408" cy:directed="1"/>
      <edge id="14920" label="P60879 (pp) P63017" source="12381" target="12420" cy:directed="1"/>
      <edge id="14919" label="P60879 (pp) O55042" source="12381" target="12616" cy:directed="1"/>
      <edge id="14918" label="P60879 (pp) Q8K400" source="12381" target="12797" cy:directed="1"/>
      <edge id="14917" label="P60879 (pp) P63040" source="12381" target="12461" cy:directed="1"/>
      <edge id="14916" label="P60879 (pp) P61264" source="12381" target="12467" cy:directed="1"/>
      <edge id="14915" label="P60879 (pp) O08599" source="12381" target="12674" cy:directed="1"/>
      <edge id="14914" label="P60879 (pp) Q7TSJ2" source="12381" target="12720" cy:directed="1"/>
      <edge id="14913" label="P60879 (pp) P68368" source="12381" target="12532" cy:directed="1"/>
      <edge id="14912" label="P60879 (pp) P16858" source="12381" target="12559" cy:directed="1"/>
      <edge id="14911" label="P60879 (pp) Q9QWI6" source="12381" target="12480" cy:directed="1"/>
      <edge id="14910" label="P60879 (pp) P46096" source="12381" target="12690" cy:directed="1"/>
      <edge id="14909" label="P60879 (pp) P17426" source="12381" target="12291" cy:directed="1"/>
      <edge id="14908" label="P60879 (pp) Q62442" source="12381" target="12333" cy:directed="1"/>
      <edge id="14907" label="P60879 (pp) P47708" source="12381" target="12654" cy:directed="1"/>
      <edge id="14906" label="P60879 (pp) P63044" source="12381" target="12400" cy:directed="1"/>
      <edge id="14905" label="P60879 (pp) P51863" source="12381" target="12223" cy:directed="1"/>
      <edge id="14904" label="P60879 (pp) P06837" source="12381" target="12507" cy:directed="1"/>
      <edge id="14903" label="P60879 (pp) P28660" source="12381" target="12382" cy:directed="1"/>
      <edge id="14902" label="Q9DCJ5 (pp) O09111" source="12380" target="12211" cy:directed="1"/>
      <edge id="14901" label="Q9DCJ5 (pp) P56391" source="12380" target="12331" cy:directed="1"/>
      <edge id="14900" label="Q9DCJ5 (pp) Q99LY9" source="12380" target="12252" cy:directed="1"/>
      <edge id="14899" label="Q9DCJ5 (pp) Q91VR2" source="12380" target="12263" cy:directed="1"/>
      <edge id="14898" label="Q9DCJ5 (pp) Q9D6J6" source="12380" target="12207" cy:directed="1"/>
      <edge id="14897" label="Q9DCJ5 (pp) P99029" source="12380" target="12356" cy:directed="1"/>
      <edge id="14896" label="Q9DCJ5 (pp) O08756" source="12380" target="12383" cy:directed="1"/>
      <edge id="14895" label="Q9DCJ5 (pp) Q99LX0" source="12380" target="12317" cy:directed="1"/>
      <edge id="14894" label="Q9DCJ5 (pp) P67778" source="12380" target="12261" cy:directed="1"/>
      <edge id="14893" label="Q9DCJ5 (pp) Q9DCX2" source="12380" target="12366" cy:directed="1"/>
      <edge id="14892" label="Q9DCJ5 (pp) Q9CQH3" source="12380" target="12240" cy:directed="1"/>
      <edge id="14891" label="Q9DCJ5 (pp) Q9CPQ8" source="12380" target="12264" cy:directed="1"/>
      <edge id="14890" label="Q9DCJ5 (pp) Q9ERS2" source="12380" target="12339" cy:directed="1"/>
      <edge id="14889" label="Q9DCJ5 (pp) Q9CQQ7" source="12380" target="12409" cy:directed="1"/>
      <edge id="14888" label="Q9DCJ5 (pp) Q9DC69" source="12380" target="12407" cy:directed="1"/>
      <edge id="14887" label="Q9DCJ5 (pp) Q9D3D9" source="12380" target="12210" cy:directed="1"/>
      <edge id="14886" label="Q9DCJ5 (pp) Q3UIU2" source="12380" target="12288" cy:directed="1"/>
      <edge id="14885" label="Q9DCJ5 (pp) Q8K3J1" source="12380" target="12404" cy:directed="1"/>
      <edge id="14884" label="Q9DCJ5 (pp) P50516" source="12380" target="12293" cy:directed="1"/>
      <edge id="14883" label="Q91YT0 (pp) Q9WUM5" source="12379" target="12276" cy:directed="1"/>
      <edge id="14882" label="Q91YT0 (pp) Q8CAQ8" source="12379" target="12553" cy:directed="1"/>
      <edge id="14881" label="Q91YT0 (pp) Q9DCJ5" source="12379" target="12380" cy:directed="1"/>
      <edge id="14880" label="Q91YT0 (pp) Q99LX0" source="12379" target="12317" cy:directed="1"/>
      <edge id="14879" label="Q91YT0 (pp) Q9CQ69" source="12379" target="12234" cy:directed="1"/>
      <edge id="14878" label="Q91YT0 (pp) O09111" source="12379" target="12211" cy:directed="1"/>
      <edge id="14877" label="Q91YT0 (pp) Q8K3J1" source="12379" target="12404" cy:directed="1"/>
      <edge id="14876" label="Q91YT0 (pp) Q91VR2" source="12379" target="12263" cy:directed="1"/>
      <edge id="14875" label="Q91YT0 (pp) Q3UIU2" source="12379" target="12288" cy:directed="1"/>
      <edge id="14874" label="Q91YT0 (pp) Q9D2G2" source="12379" target="12287" cy:directed="1"/>
      <edge id="14873" label="Q91YT0 (pp) Q9DCS9" source="12379" target="12266" cy:directed="1"/>
      <edge id="14872" label="Q91YT0 (pp) Q9D3D9" source="12379" target="12210" cy:directed="1"/>
      <edge id="14871" label="Q91YT0 (pp) Q9ERS2" source="12379" target="12339" cy:directed="1"/>
      <edge id="14870" label="Q91YT0 (pp) Q60597" source="12379" target="12511" cy:directed="1"/>
      <edge id="14869" label="Q91YT0 (pp) Q9CR68" source="12379" target="12267" cy:directed="1"/>
      <edge id="14868" label="Q91YT0 (pp) Q9CQQ7" source="12379" target="12409" cy:directed="1"/>
      <edge id="14867" label="Q91YT0 (pp) Q9DCX2" source="12379" target="12366" cy:directed="1"/>
      <edge id="14866" label="Q91YT0 (pp) Q9DC69" source="12379" target="12407" cy:directed="1"/>
      <edge id="14865" label="Q91YT0 (pp) P70404" source="12379" target="12294" cy:directed="1"/>
      <edge id="14864" label="Q91YT0 (pp) Q9D6J6" source="12379" target="12207" cy:directed="1"/>
      <edge id="14863" label="Q91YT0 (pp) Q9CQH3" source="12379" target="12240" cy:directed="1"/>
      <edge id="14862" label="Q91YT0 (pp) Q06185" source="12379" target="12271" cy:directed="1"/>
      <edge id="14861" label="Q9JM76 (pp) P59999" source="12378" target="12492" cy:directed="1"/>
      <edge id="14860" label="Q9JM76 (pp) P68510" source="12378" target="12213" cy:directed="1"/>
      <edge id="14859" label="Q9JM76 (pp) Q9D898" source="12378" target="12421" cy:directed="1"/>
      <edge id="14858" label="Q9R0Q6 (pp) Q9CPW4" source="12377" target="12514" cy:directed="1"/>
      <edge id="14857" label="Q9R0Q6 (pp) P59999" source="12377" target="12492" cy:directed="1"/>
      <edge id="14856" label="Q9R0Q6 (pp) Q9JM76" source="12377" target="12378" cy:directed="1"/>
      <edge id="14855" label="Q68FD5 (pp) P17426" source="12376" target="12291" cy:directed="1"/>
      <edge id="14854" label="Q68FD5 (pp) Q62420" source="12376" target="12471" cy:directed="1"/>
      <edge id="14853" label="Q68FD5 (pp) P62962" source="12376" target="12442" cy:directed="1"/>
      <edge id="14852" label="Q68FD5 (pp) P35438" source="12376" target="12215" cy:directed="1"/>
      <edge id="14851" label="Q68FD5 (pp) Q6IRU5" source="12376" target="12537" cy:directed="1"/>
      <edge id="14850" label="Q68FD5 (pp) P63101" source="12376" target="12479" cy:directed="1"/>
      <edge id="14849" label="Q68FD5 (pp) Q80VP1" source="12376" target="12632" cy:directed="1"/>
      <edge id="14848" label="Q68FD5 (pp) O35643" source="12376" target="12679" cy:directed="1"/>
      <edge id="14847" label="Q68FD5 (pp) Q80TZ3" source="12376" target="12725" cy:directed="1"/>
      <edge id="14846" label="Q68FD5 (pp) Q9Z0R4" source="12376" target="12601" cy:directed="1"/>
      <edge id="14845" label="Q68FD5 (pp) O70589" source="12376" target="12564" cy:directed="1"/>
      <edge id="14844" label="Q68FD5 (pp) O08585" source="12376" target="12607" cy:directed="1"/>
      <edge id="14843" label="Q68FD5 (pp) P62743" source="12376" target="12657" cy:directed="1"/>
      <edge id="14842" label="Q68FD5 (pp) Q8CHC4" source="12376" target="12639" cy:directed="1"/>
      <edge id="14841" label="Q68FD5 (pp) Q01097" source="12376" target="12204" cy:directed="1"/>
      <edge id="14840" label="Q68FD5 (pp) Q8CHU3" source="12376" target="12491" cy:directed="1"/>
      <edge id="14839" label="Q68FD5 (pp) Q61548" source="12376" target="12418" cy:directed="1"/>
      <edge id="14838" label="Q68FD5 (pp) P62259" source="12376" target="12225" cy:directed="1"/>
      <edge id="14837" label="Q60864 (pp) P63038" source="12374" target="12247" cy:directed="1"/>
      <edge id="14836" label="Q60864 (pp) P04925" source="12374" target="12385" cy:directed="1"/>
      <edge id="14835" label="Q60864 (pp) Q9CR16" source="12374" target="12735" cy:directed="1"/>
      <edge id="14834" label="Q60864 (pp) P48722" source="12374" target="12702" cy:directed="1"/>
      <edge id="14833" label="Q60864 (pp) Q61699" source="12374" target="12718" cy:directed="1"/>
      <edge id="14832" label="Q60864 (pp) P63037" source="12374" target="12279" cy:directed="1"/>
      <edge id="14831" label="Q60864 (pp) P17156" source="12374" target="12578" cy:directed="1"/>
      <edge id="14830" label="Q60864 (pp) Q9QYJ0" source="12374" target="12375" cy:directed="1"/>
      <edge id="14829" label="P19536 (pp) P00405" source="12373" target="12669" cy:directed="1"/>
      <edge id="14828" label="P19536 (pp) Q91VR2" source="12373" target="12263" cy:directed="1"/>
      <edge id="14827" label="P19536 (pp) Q9CQH3" source="12373" target="12240" cy:directed="1"/>
      <edge id="14826" label="P19536 (pp) Q9CQ69" source="12373" target="12234" cy:directed="1"/>
      <edge id="14825" label="P19536 (pp) P56391" source="12373" target="12331" cy:directed="1"/>
      <edge id="14824" label="P19536 (pp) Q9D3D9" source="12373" target="12210" cy:directed="1"/>
      <edge id="14823" label="P19536 (pp) Q9CR68" source="12373" target="12267" cy:directed="1"/>
      <edge id="14822" label="Q9JLB0 (pp) O70318" source="12371" target="12597" cy:directed="1"/>
      <edge id="14821" label="Q9JLB0 (pp) Q8R5M8" source="12371" target="12328" cy:directed="1"/>
      <edge id="14820" label="Q9JLB0 (pp) Q99N28" source="12371" target="12372" cy:directed="1"/>
      <edge id="14819" label="Q8BVE3 (pp) Q9DC69" source="12370" target="12407" cy:directed="1"/>
      <edge id="14818" label="Q8BVE3 (pp) P50516" source="12370" target="12293" cy:directed="1"/>
      <edge id="14817" label="Q8BVE3 (pp) P63082" source="12370" target="12448" cy:directed="1"/>
      <edge id="14816" label="Q8BVE3 (pp) Q9Z1G4" source="12370" target="12275" cy:directed="1"/>
      <edge id="14815" label="Q8BVE3 (pp) P45878" source="12370" target="12419" cy:directed="1"/>
      <edge id="14814" label="P50518 (pp) P50516" source="12369" target="12293" cy:directed="1"/>
      <edge id="14813" label="P50518 (pp) Q9Z1G3" source="12369" target="12224" cy:directed="1"/>
      <edge id="14812" label="P50518 (pp) Q9WTT4" source="12369" target="12489" cy:directed="1"/>
      <edge id="14811" label="P50518 (pp) P57746" source="12369" target="12292" cy:directed="1"/>
      <edge id="14810" label="P50518 (pp) P63082" source="12369" target="12448" cy:directed="1"/>
      <edge id="14809" label="P50518 (pp) Q9Z1G4" source="12369" target="12275" cy:directed="1"/>
      <edge id="14808" label="P50518 (pp) Q8BVE3" source="12369" target="12370" cy:directed="1"/>
      <edge id="14807" label="Q61735 (pp) P97797" source="12367" target="12368" cy:directed="1"/>
      <edge id="14806" label="Q9DCX2 (pp) Q99LY9" source="12366" target="12252" cy:directed="1"/>
      <edge id="14805" label="Q9DCX2 (pp) Q9D3D9" source="12366" target="12210" cy:directed="1"/>
      <edge id="14804" label="Q9DCX2 (pp) Q9CQH3" source="12366" target="12240" cy:directed="1"/>
      <edge id="14803" label="Q9DCX2 (pp) Q9D6J6" source="12366" target="12207" cy:directed="1"/>
      <edge id="14802" label="Q9DCX2 (pp) Q9CQQ7" source="12366" target="12409" cy:directed="1"/>
      <edge id="14801" label="Q9DCX2 (pp) Q91VR2" source="12366" target="12263" cy:directed="1"/>
      <edge id="14800" label="Q9DCX2 (pp) Q99LX0" source="12366" target="12317" cy:directed="1"/>
      <edge id="14799" label="Q9DCX2 (pp) Q9ERS2" source="12366" target="12339" cy:directed="1"/>
      <edge id="14798" label="Q7TMF3 (pp) Q99LC3" source="12365" target="12251" cy:directed="1"/>
      <edge id="14797" label="Q7TMF3 (pp) Q91VD9" source="12365" target="12265" cy:directed="1"/>
      <edge id="14796" label="Q7TMF3 (pp) Q91YT0" source="12365" target="12379" cy:directed="1"/>
      <edge id="14795" label="Q7TMF3 (pp) Q9CQ69" source="12365" target="12234" cy:directed="1"/>
      <edge id="14794" label="Q7TMF3 (pp) Q9D6J6" source="12365" target="12207" cy:directed="1"/>
      <edge id="14793" label="Q7TMF3 (pp) Q9D3D9" source="12365" target="12210" cy:directed="1"/>
      <edge id="14792" label="Q7TMF3 (pp) Q9CQH3" source="12365" target="12240" cy:directed="1"/>
      <edge id="14791" label="Q7TMF3 (pp) Q9CQC7" source="12365" target="12494" cy:directed="1"/>
      <edge id="14790" label="Q7TMF3 (pp) Q8K3J1" source="12365" target="12404" cy:directed="1"/>
      <edge id="14789" label="Q7TMF3 (pp) Q99LY9" source="12365" target="12252" cy:directed="1"/>
      <edge id="14788" label="Q7TMF3 (pp) Q9D6J5" source="12365" target="12487" cy:directed="1"/>
      <edge id="14787" label="Q7TMF3 (pp) Q9CQJ8" source="12365" target="12270" cy:directed="1"/>
      <edge id="14786" label="Q7TMF3 (pp) Q9ERS2" source="12365" target="12339" cy:directed="1"/>
      <edge id="14785" label="Q7TMF3 (pp) Q3UIU2" source="12365" target="12288" cy:directed="1"/>
      <edge id="14784" label="Q7TMF3 (pp) Q9CQZ6" source="12365" target="12231" cy:directed="1"/>
      <edge id="14783" label="Q7TMF3 (pp) Q9DCJ5" source="12365" target="12380" cy:directed="1"/>
      <edge id="14782" label="Q7TMF3 (pp) Q9Z1P6" source="12365" target="12299" cy:directed="1"/>
      <edge id="14781" label="Q7TMF3 (pp) Q9CQQ7" source="12365" target="12409" cy:directed="1"/>
      <edge id="14780" label="Q7TMF3 (pp) Q9CQZ5" source="12365" target="12206" cy:directed="1"/>
      <edge id="14779" label="Q7TMF3 (pp) Q9DCS9" source="12365" target="12266" cy:directed="1"/>
      <edge id="14778" label="Q7TMF3 (pp) Q9DC70" source="12365" target="12272" cy:directed="1"/>
      <edge id="14777" label="Q7TMF3 (pp) Q9D855" source="12365" target="12403" cy:directed="1"/>
      <edge id="14776" label="Q7TMF3 (pp) P52503" source="12365" target="12352" cy:directed="1"/>
      <edge id="14775" label="Q7TMF3 (pp) P97450" source="12365" target="12430" cy:directed="1"/>
      <edge id="14774" label="Q7TMF3 (pp) Q9D0M3" source="12365" target="12250" cy:directed="1"/>
      <edge id="14773" label="Q7TMF3 (pp) Q62425" source="12365" target="12545" cy:directed="1"/>
      <edge id="14772" label="Q7TMF3 (pp) Q9DC69" source="12365" target="12407" cy:directed="1"/>
      <edge id="14771" label="Q7TMF3 (pp) Q9CQ54" source="12365" target="12232" cy:directed="1"/>
      <edge id="14770" label="Q7TMF3 (pp) Q9CR68" source="12365" target="12267" cy:directed="1"/>
      <edge id="14769" label="Q7TMF3 (pp) O09111" source="12365" target="12211" cy:directed="1"/>
      <edge id="14768" label="Q7TMF3 (pp) Q9CXZ1" source="12365" target="12396" cy:directed="1"/>
      <edge id="14767" label="Q7TMF3 (pp) Q9DCX2" source="12365" target="12366" cy:directed="1"/>
      <edge id="14766" label="O35658 (pp) Q9CQQ7" source="12364" target="12409" cy:directed="1"/>
      <edge id="14765" label="O35658 (pp) P40630" source="12364" target="12594" cy:directed="1"/>
      <edge id="14764" label="Q99KR7 (pp) P56480" source="12363" target="12258" cy:directed="1"/>
      <edge id="14763" label="Q99KR7 (pp) O35658" source="12363" target="12364" cy:directed="1"/>
      <edge id="14762" label="P62874 (pp) P04925" source="12361" target="12385" cy:directed="1"/>
      <edge id="14761" label="P63213 (pp) P18872" source="12360" target="12390" cy:directed="1"/>
      <edge id="14760" label="P63213 (pp) P62874" source="12360" target="12361" cy:directed="1"/>
      <edge id="14759" label="P40142 (pp) P05063" source="12359" target="12512" cy:directed="1"/>
      <edge id="14758" label="P40142 (pp) Q9D0F9" source="12359" target="12635" cy:directed="1"/>
      <edge id="14757" label="P40142 (pp) P35486" source="12359" target="12439" cy:directed="1"/>
      <edge id="14756" label="P40142 (pp) P17182" source="12359" target="12515" cy:directed="1"/>
      <edge id="14755" label="P40142 (pp) P06151" source="12359" target="12238" cy:directed="1"/>
      <edge id="14754" label="P40142 (pp) P05064" source="12359" target="12321" cy:directed="1"/>
      <edge id="14753" label="P40142 (pp) P17751" source="12359" target="12297" cy:directed="1"/>
      <edge id="14752" label="P40142 (pp) P52480" source="12359" target="12455" cy:directed="1"/>
      <edge id="14751" label="P40142 (pp) Q60597" source="12359" target="12511" cy:directed="1"/>
      <edge id="14750" label="P40142 (pp) P16858" source="12359" target="12559" cy:directed="1"/>
      <edge id="14749" label="P40142 (pp) Q93092" source="12359" target="12454" cy:directed="1"/>
      <edge id="14748" label="P40142 (pp) P06745" source="12359" target="12464" cy:directed="1"/>
      <edge id="14747" label="P40142 (pp) Q9DCD0" source="12359" target="12222" cy:directed="1"/>
      <edge id="14746" label="P40142 (pp) P09411" source="12359" target="12298" cy:directed="1"/>
      <edge id="14745" label="Q9CQR4 (pp) Q61425" source="12358" target="12314" cy:directed="1"/>
      <edge id="14744" label="Q9CQR4 (pp) Q99LC5" source="12358" target="12315" cy:directed="1"/>
      <edge id="14743" label="Q9CQR4 (pp) Q9DCJ5" source="12358" target="12380" cy:directed="1"/>
      <edge id="14742" label="Q9CQR4 (pp) Q9CQZ5" source="12358" target="12206" cy:directed="1"/>
      <edge id="14741" label="Q9CQR4 (pp) Q9CQZ6" source="12358" target="12231" cy:directed="1"/>
      <edge id="14740" label="Q9CQR4 (pp) Q9DCD0" source="12358" target="12222" cy:directed="1"/>
      <edge id="14739" label="Q9CQR4 (pp) Q9D6J6" source="12358" target="12207" cy:directed="1"/>
      <edge id="14738" label="Q9CQR4 (pp) P97450" source="12358" target="12430" cy:directed="1"/>
      <edge id="14737" label="Q9CQR4 (pp) Q9CQH3" source="12358" target="12240" cy:directed="1"/>
      <edge id="14736" label="Q9CQV8 (pp) P10637" source="12357" target="12534" cy:directed="1"/>
      <edge id="14735" label="Q9CQV8 (pp) Q64010" source="12357" target="12429" cy:directed="1"/>
      <edge id="14734" label="Q9CQV8 (pp) P16054" source="12357" target="12443" cy:directed="1"/>
      <edge id="14733" label="Q9CQV8 (pp) P63101" source="12357" target="12479" cy:directed="1"/>
      <edge id="14732" label="Q9CQV8 (pp) P62259" source="12357" target="12225" cy:directed="1"/>
      <edge id="14731" label="P99029 (pp) Q9D6J6" source="12356" target="12207" cy:directed="1"/>
      <edge id="14730" label="P62073 (pp) Q9CQH3" source="12355" target="12240" cy:directed="1"/>
      <edge id="14729" label="P62073 (pp) Q9D6J6" source="12355" target="12207" cy:directed="1"/>
      <edge id="14728" label="P62073 (pp) P67778" source="12355" target="12261" cy:directed="1"/>
      <edge id="14727" label="P62073 (pp) Q9DCS9" source="12355" target="12266" cy:directed="1"/>
      <edge id="14726" label="P62073 (pp) Q9D3D9" source="12355" target="12210" cy:directed="1"/>
      <edge id="14725" label="P62073 (pp) Q9CR68" source="12355" target="12267" cy:directed="1"/>
      <edge id="14724" label="P62073 (pp) O35658" source="12355" target="12364" cy:directed="1"/>
      <edge id="14723" label="P62073 (pp) P56391" source="12355" target="12331" cy:directed="1"/>
      <edge id="14722" label="P62073 (pp) Q9DCJ5" source="12355" target="12380" cy:directed="1"/>
      <edge id="14721" label="P62073 (pp) Q925I1" source="12355" target="12589" cy:directed="1"/>
      <edge id="14720" label="P62073 (pp) Q9ERS2" source="12355" target="12339" cy:directed="1"/>
      <edge id="14719" label="P62073 (pp) O08756" source="12355" target="12383" cy:directed="1"/>
      <edge id="14718" label="P62073 (pp) P99029" source="12355" target="12356" cy:directed="1"/>
      <edge id="14717" label="Q62277 (pp) P43006" source="12354" target="12773" cy:directed="1"/>
      <edge id="14716" label="Q62277 (pp) P01831" source="12354" target="12619" cy:directed="1"/>
      <edge id="14715" label="Q62277 (pp) P63044" source="12354" target="12400" cy:directed="1"/>
      <edge id="14714" label="Q62277 (pp) P46096" source="12354" target="12690" cy:directed="1"/>
      <edge id="14713" label="Q62277 (pp) P62204" source="12354" target="12579" cy:directed="1"/>
      <edge id="14712" label="Q62277 (pp) P60879" source="12354" target="12381" cy:directed="1"/>
      <edge id="14711" label="Q60631 (pp) Q68FD5" source="12353" target="12376" cy:directed="1"/>
      <edge id="14710" label="Q60631 (pp) P39053" source="12353" target="12497" cy:directed="1"/>
      <edge id="14709" label="Q60631 (pp) Q8CHC4" source="12353" target="12639" cy:directed="1"/>
      <edge id="14708" label="Q60631 (pp) P05480" source="12353" target="12344" cy:directed="1"/>
      <edge id="14707" label="Q60631 (pp) O08585" source="12353" target="12607" cy:directed="1"/>
      <edge id="14706" label="Q60631 (pp) P12023" source="12353" target="12325" cy:directed="1"/>
      <edge id="14705" label="Q60631 (pp) P20444" source="12353" target="12676" cy:directed="1"/>
      <edge id="14704" label="Q60631 (pp) P04925" source="12353" target="12385" cy:directed="1"/>
      <edge id="14703" label="Q60631 (pp) P18052" source="12353" target="12414" cy:directed="1"/>
      <edge id="14702" label="Q60631 (pp) Q62420" source="12353" target="12471" cy:directed="1"/>
      <edge id="14701" label="Q60631 (pp) Q62277" source="12353" target="12354" cy:directed="1"/>
      <edge id="14700" label="P52503 (pp) Q9Z1P6" source="12352" target="12299" cy:directed="1"/>
      <edge id="14699" label="P52503 (pp) Q9CQ69" source="12352" target="12234" cy:directed="1"/>
      <edge id="14698" label="P52503 (pp) O09111" source="12352" target="12211" cy:directed="1"/>
      <edge id="14697" label="P52503 (pp) O08756" source="12352" target="12383" cy:directed="1"/>
      <edge id="14696" label="P52503 (pp) Q9D3D9" source="12352" target="12210" cy:directed="1"/>
      <edge id="14695" label="P52503 (pp) Q9DCS9" source="12352" target="12266" cy:directed="1"/>
      <edge id="14694" label="P52503 (pp) Q99LY9" source="12352" target="12252" cy:directed="1"/>
      <edge id="14693" label="P52503 (pp) Q9CPP6" source="12352" target="12281" cy:directed="1"/>
      <edge id="14692" label="P52503 (pp) P17665" source="12352" target="12555" cy:directed="1"/>
      <edge id="14691" label="P52503 (pp) Q9CQ54" source="12352" target="12232" cy:directed="1"/>
      <edge id="14690" label="P52503 (pp) Q06185" source="12352" target="12271" cy:directed="1"/>
      <edge id="14689" label="P52503 (pp) Q9ERS2" source="12352" target="12339" cy:directed="1"/>
      <edge id="14688" label="P52503 (pp) P99029" source="12352" target="12356" cy:directed="1"/>
      <edge id="14687" label="P52503 (pp) Q9D6J5" source="12352" target="12487" cy:directed="1"/>
      <edge id="14686" label="P52503 (pp) Q9CQC7" source="12352" target="12494" cy:directed="1"/>
      <edge id="14685" label="P52503 (pp) Q9D0M3" source="12352" target="12250" cy:directed="1"/>
      <edge id="14684" label="P52503 (pp) Q9CXZ1" source="12352" target="12396" cy:directed="1"/>
      <edge id="14683" label="P52503 (pp) Q9DCJ5" source="12352" target="12380" cy:directed="1"/>
      <edge id="14682" label="P52503 (pp) Q99LX0" source="12352" target="12317" cy:directed="1"/>
      <edge id="14681" label="P52503 (pp) P97450" source="12352" target="12430" cy:directed="1"/>
      <edge id="14680" label="P52503 (pp) Q99LC3" source="12352" target="12251" cy:directed="1"/>
      <edge id="14679" label="P52503 (pp) Q9DB20" source="12352" target="12239" cy:directed="1"/>
      <edge id="14678" label="P52503 (pp) P56391" source="12352" target="12331" cy:directed="1"/>
      <edge id="14677" label="P52503 (pp) Q9CR68" source="12352" target="12267" cy:directed="1"/>
      <edge id="14676" label="P52503 (pp) Q9CQH3" source="12352" target="12240" cy:directed="1"/>
      <edge id="14675" label="P52503 (pp) Q9CQJ8" source="12352" target="12270" cy:directed="1"/>
      <edge id="14674" label="P52503 (pp) Q9CQQ7" source="12352" target="12409" cy:directed="1"/>
      <edge id="14673" label="P52503 (pp) Q8K3J1" source="12352" target="12404" cy:directed="1"/>
      <edge id="14672" label="P52503 (pp) Q9DC69" source="12352" target="12407" cy:directed="1"/>
      <edge id="14671" label="P52503 (pp) P62073" source="12352" target="12355" cy:directed="1"/>
      <edge id="14670" label="P52503 (pp) P43024" source="12352" target="12472" cy:directed="1"/>
      <edge id="14669" label="P52503 (pp) P42125" source="12352" target="12519" cy:directed="1"/>
      <edge id="14668" label="P52503 (pp) Q9CQZ5" source="12352" target="12206" cy:directed="1"/>
      <edge id="14667" label="P52503 (pp) Q91VD9" source="12352" target="12265" cy:directed="1"/>
      <edge id="14666" label="P52503 (pp) Q9CZ13" source="12352" target="12249" cy:directed="1"/>
      <edge id="14665" label="P52503 (pp) Q91YT0" source="12352" target="12379" cy:directed="1"/>
      <edge id="14664" label="P52503 (pp) Q9CQZ6" source="12352" target="12231" cy:directed="1"/>
      <edge id="14663" label="P52503 (pp) P48771" source="12352" target="12303" cy:directed="1"/>
      <edge id="14662" label="P52503 (pp) Q9D6J6" source="12352" target="12207" cy:directed="1"/>
      <edge id="14661" label="Q8R4N0 (pp) Q99LC5" source="12351" target="12315" cy:directed="1"/>
      <edge id="14660" label="Q8R4N0 (pp) Q9WUM5" source="12351" target="12276" cy:directed="1"/>
      <edge id="14659" label="Q8R4N0 (pp) P05480" source="12351" target="12344" cy:directed="1"/>
      <edge id="14658" label="Q8R4N0 (pp) Q99MR8" source="12351" target="12625" cy:directed="1"/>
      <edge id="14657" label="Q8R4N0 (pp) Q91ZA3" source="12351" target="12477" cy:directed="1"/>
      <edge id="14656" label="Q3ULD5 (pp) Q05920" source="12350" target="12254" cy:directed="1"/>
      <edge id="14655" label="Q3ULD5 (pp) Q9D0K2" source="12350" target="12277" cy:directed="1"/>
      <edge id="14654" label="Q3ULD5 (pp) Q99MR8" source="12350" target="12625" cy:directed="1"/>
      <edge id="14653" label="Q3ULD5 (pp) Q91ZA3" source="12350" target="12477" cy:directed="1"/>
      <edge id="14652" label="Q3ULD5 (pp) Q8BH95" source="12350" target="12248" cy:directed="1"/>
      <edge id="14651" label="Q3ULD5 (pp) Q8BMS1" source="12350" target="12516" cy:directed="1"/>
      <edge id="14650" label="Q3ULD5 (pp) Q921G7" source="12350" target="12310" cy:directed="1"/>
      <edge id="14649" label="Q3ULD5 (pp) Q9JHI5" source="12350" target="12453" cy:directed="1"/>
      <edge id="14648" label="Q3ULD5 (pp) Q99MN9" source="12350" target="12434" cy:directed="1"/>
      <edge id="14647" label="Q3ULD5 (pp) Q8R4N0" source="12350" target="12351" cy:directed="1"/>
      <edge id="14646" label="Q8VEM8 (pp) Q9D3D9" source="12349" target="12210" cy:directed="1"/>
      <edge id="14645" label="Q8VEM8 (pp) Q9CQQ7" source="12349" target="12409" cy:directed="1"/>
      <edge id="14644" label="Q8VEM8 (pp) Q9CQH3" source="12349" target="12240" cy:directed="1"/>
      <edge id="14643" label="Q8VEM8 (pp) Q9D6J6" source="12349" target="12207" cy:directed="1"/>
      <edge id="14642" label="P68369 (pp) P60879" source="12348" target="12381" cy:directed="1"/>
      <edge id="14641" label="P68369 (pp) P35438" source="12348" target="12215" cy:directed="1"/>
      <edge id="14640" label="P68369 (pp) P63101" source="12348" target="12479" cy:directed="1"/>
      <edge id="14639" label="P68369 (pp) P27546" source="12348" target="12665" cy:directed="1"/>
      <edge id="14638" label="P68369 (pp) P39053" source="12348" target="12497" cy:directed="1"/>
      <edge id="14637" label="Q8K2B3 (pp) Q99JY0" source="12347" target="12384" cy:directed="1"/>
      <edge id="14636" label="Q8K2B3 (pp) P58281" source="12347" target="12664" cy:directed="1"/>
      <edge id="14635" label="Q8K2B3 (pp) P17751" source="12347" target="12297" cy:directed="1"/>
      <edge id="14634" label="Q8K2B3 (pp) Q91VD9" source="12347" target="12265" cy:directed="1"/>
      <edge id="14633" label="Q8K2B3 (pp) Q9D6R2" source="12347" target="12236" cy:directed="1"/>
      <edge id="14632" label="Q8K2B3 (pp) P63038" source="12347" target="12247" cy:directed="1"/>
      <edge id="14631" label="Q8K2B3 (pp) Q8K3J1" source="12347" target="12404" cy:directed="1"/>
      <edge id="14630" label="Q8K2B3 (pp) P35486" source="12347" target="12439" cy:directed="1"/>
      <edge id="14629" label="Q8K2B3 (pp) Q9DB77" source="12347" target="12405" cy:directed="1"/>
      <edge id="14628" label="Q8K2B3 (pp) Q9D6J6" source="12347" target="12207" cy:directed="1"/>
      <edge id="14627" label="Q8K2B3 (pp) Q9DC69" source="12347" target="12407" cy:directed="1"/>
      <edge id="14626" label="Q8K2B3 (pp) Q9CZ13" source="12347" target="12249" cy:directed="1"/>
      <edge id="14625" label="Q8K2B3 (pp) Q9CR68" source="12347" target="12267" cy:directed="1"/>
      <edge id="14624" label="Q8K2B3 (pp) Q99LC5" source="12347" target="12315" cy:directed="1"/>
      <edge id="14623" label="Q8K2B3 (pp) Q9WUM5" source="12347" target="12276" cy:directed="1"/>
      <edge id="14622" label="Q8K2B3 (pp) P56480" source="12347" target="12258" cy:directed="1"/>
      <edge id="14621" label="Q8K2B3 (pp) Q60597" source="12347" target="12511" cy:directed="1"/>
      <edge id="14620" label="Q8K2B3 (pp) P00493" source="12347" target="12600" cy:directed="1"/>
      <edge id="14619" label="Q8K2B3 (pp) Q9Z2I9" source="12347" target="12458" cy:directed="1"/>
      <edge id="14618" label="Q8K2B3 (pp) Q91YT0" source="12347" target="12379" cy:directed="1"/>
      <edge id="14617" label="Q8K2B3 (pp) P09411" source="12347" target="12298" cy:directed="1"/>
      <edge id="14616" label="Q8K2B3 (pp) Q99KI0" source="12347" target="12338" cy:directed="1"/>
      <edge id="14615" label="Q8K2B3 (pp) Q9CQQ7" source="12347" target="12409" cy:directed="1"/>
      <edge id="14614" label="Q8K2B3 (pp) Q9CPP6" source="12347" target="12281" cy:directed="1"/>
      <edge id="14613" label="Q8K2B3 (pp) P52196" source="12347" target="12268" cy:directed="1"/>
      <edge id="14612" label="Q8K2B3 (pp) Q03265" source="12347" target="12212" cy:directed="1"/>
      <edge id="14611" label="Q8K2B3 (pp) Q9D051" source="12347" target="12209" cy:directed="1"/>
      <edge id="14610" label="Q8K2B3 (pp) Q9Z0X1" source="12347" target="12550" cy:directed="1"/>
      <edge id="14609" label="Q8K2B3 (pp) Q9D2G2" source="12347" target="12287" cy:directed="1"/>
      <edge id="14608" label="Q8K2B3 (pp) Q91VR2" source="12347" target="12263" cy:directed="1"/>
      <edge id="14607" label="Q8K2B3 (pp) Q9D0M3" source="12347" target="12250" cy:directed="1"/>
      <edge id="14606" label="Q8K2B3 (pp) Q8VEM8" source="12347" target="12349" cy:directed="1"/>
      <edge id="14605" label="Q8K2B3 (pp) Q8JZQ2" source="12347" target="12393" cy:directed="1"/>
      <edge id="14604" label="Q8K2B3 (pp) P97807" source="12347" target="12340" cy:directed="1"/>
      <edge id="14603" label="Q91WD5 (pp) Q9CPP6" source="12346" target="12281" cy:directed="1"/>
      <edge id="14602" label="Q91WD5 (pp) Q99LY9" source="12346" target="12252" cy:directed="1"/>
      <edge id="14601" label="Q91WD5 (pp) Q91YT0" source="12346" target="12379" cy:directed="1"/>
      <edge id="14600" label="Q91WD5 (pp) Q9DC69" source="12346" target="12407" cy:directed="1"/>
      <edge id="14599" label="Q91WD5 (pp) Q9WUM5" source="12346" target="12276" cy:directed="1"/>
      <edge id="14598" label="Q91WD5 (pp) P35486" source="12346" target="12439" cy:directed="1"/>
      <edge id="14597" label="Q91WD5 (pp) Q91VD9" source="12346" target="12265" cy:directed="1"/>
      <edge id="14596" label="Q91WD5 (pp) P09411" source="12346" target="12298" cy:directed="1"/>
      <edge id="14595" label="Q91WD5 (pp) Q9DB20" source="12346" target="12239" cy:directed="1"/>
      <edge id="14594" label="Q91WD5 (pp) Q9CZ13" source="12346" target="12249" cy:directed="1"/>
      <edge id="14593" label="Q91WD5 (pp) Q99LC5" source="12346" target="12315" cy:directed="1"/>
      <edge id="14592" label="Q91WD5 (pp) Q8BH95" source="12346" target="12248" cy:directed="1"/>
      <edge id="14591" label="Q91WD5 (pp) P17751" source="12346" target="12297" cy:directed="1"/>
      <edge id="14590" label="Q91WD5 (pp) P52503" source="12346" target="12352" cy:directed="1"/>
      <edge id="14589" label="Q91WD5 (pp) Q8K1Z0" source="12346" target="12319" cy:directed="1"/>
      <edge id="14588" label="Q91WD5 (pp) Q9ERS2" source="12346" target="12339" cy:directed="1"/>
      <edge id="14587" label="Q91WD5 (pp) Q9CQ75" source="12346" target="12389" cy:directed="1"/>
      <edge id="14586" label="Q91WD5 (pp) Q9D6J5" source="12346" target="12487" cy:directed="1"/>
      <edge id="14585" label="Q91WD5 (pp) Q8K3J1" source="12346" target="12404" cy:directed="1"/>
      <edge id="14584" label="Q91WD5 (pp) P56480" source="12346" target="12258" cy:directed="1"/>
      <edge id="14583" label="Q91WD5 (pp) Q6PB66" source="12346" target="12498" cy:directed="1"/>
      <edge id="14582" label="Q91WD5 (pp) Q8CAQ8" source="12346" target="12553" cy:directed="1"/>
      <edge id="14581" label="Q91WD5 (pp) Q7TMF3" source="12346" target="12365" cy:directed="1"/>
      <edge id="14580" label="Q91WD5 (pp) Q03265" source="12346" target="12212" cy:directed="1"/>
      <edge id="14579" label="Q91WD5 (pp) Q8BGH2" source="12346" target="12316" cy:directed="1"/>
      <edge id="14578" label="Q91WD5 (pp) P20108" source="12346" target="12427" cy:directed="1"/>
      <edge id="14577" label="Q91WD5 (pp) Q3ULD5" source="12346" target="12350" cy:directed="1"/>
      <edge id="14576" label="Q91WD5 (pp) Q9CR68" source="12346" target="12267" cy:directed="1"/>
      <edge id="14575" label="Q91WD5 (pp) Q9DCS9" source="12346" target="12266" cy:directed="1"/>
      <edge id="14574" label="Q91WD5 (pp) Q9D6J6" source="12346" target="12207" cy:directed="1"/>
      <edge id="14573" label="Q91WD5 (pp) Q9CXZ1" source="12346" target="12396" cy:directed="1"/>
      <edge id="14572" label="Q91WD5 (pp) Q9DB77" source="12346" target="12405" cy:directed="1"/>
      <edge id="14571" label="Q91WD5 (pp) Q9CQJ8" source="12346" target="12270" cy:directed="1"/>
      <edge id="14570" label="Q91WD5 (pp) Q9CQC7" source="12346" target="12494" cy:directed="1"/>
      <edge id="14569" label="Q91WD5 (pp) P97450" source="12346" target="12430" cy:directed="1"/>
      <edge id="14568" label="Q91WD5 (pp) Q9CQZ5" source="12346" target="12206" cy:directed="1"/>
      <edge id="14567" label="Q91WD5 (pp) Q99LC3" source="12346" target="12251" cy:directed="1"/>
      <edge id="14566" label="Q91WD5 (pp) Q99LX0" source="12346" target="12317" cy:directed="1"/>
      <edge id="14565" label="Q91WD5 (pp) Q9CQQ7" source="12346" target="12409" cy:directed="1"/>
      <edge id="14564" label="Q91WD5 (pp) P97807" source="12346" target="12340" cy:directed="1"/>
      <edge id="14563" label="Q91WD5 (pp) Q9DC70" source="12346" target="12272" cy:directed="1"/>
      <edge id="14562" label="Q91WD5 (pp) Q9CQH3" source="12346" target="12240" cy:directed="1"/>
      <edge id="14561" label="Q91WD5 (pp) Q9D855" source="12346" target="12403" cy:directed="1"/>
      <edge id="14560" label="Q91WD5 (pp) Q9CQ69" source="12346" target="12234" cy:directed="1"/>
      <edge id="14559" label="Q91WD5 (pp) Q91VR2" source="12346" target="12263" cy:directed="1"/>
      <edge id="14558" label="Q91WD5 (pp) Q99JY0" source="12346" target="12384" cy:directed="1"/>
      <edge id="14557" label="Q91WD5 (pp) Q99KI0" source="12346" target="12338" cy:directed="1"/>
      <edge id="14556" label="Q91WD5 (pp) Q9D0M3" source="12346" target="12250" cy:directed="1"/>
      <edge id="14555" label="Q91WD5 (pp) Q8VEM8" source="12346" target="12349" cy:directed="1"/>
      <edge id="14554" label="Q91WD5 (pp) P70404" source="12346" target="12294" cy:directed="1"/>
      <edge id="14553" label="Q91WD5 (pp) P08249" source="12346" target="12235" cy:directed="1"/>
      <edge id="14552" label="Q91WD5 (pp) Q9DCJ5" source="12346" target="12380" cy:directed="1"/>
      <edge id="14551" label="Q91WD5 (pp) Q99MN9" source="12346" target="12434" cy:directed="1"/>
      <edge id="14550" label="Q91WD5 (pp) Q9CQZ6" source="12346" target="12231" cy:directed="1"/>
      <edge id="14549" label="Q91WD5 (pp) Q8K2B3" source="12346" target="12347" cy:directed="1"/>
      <edge id="14548" label="P51881 (pp) P16054" source="12345" target="12443" cy:directed="1"/>
      <edge id="14547" label="P51881 (pp) P62259" source="12345" target="12225" cy:directed="1"/>
      <edge id="14546" label="P05480 (pp) P23242" source="12344" target="12732" cy:directed="1"/>
      <edge id="14545" label="P05480 (pp) P30999" source="12344" target="12584" cy:directed="1"/>
      <edge id="14544" label="P05480 (pp) P39053" source="12344" target="12497" cy:directed="1"/>
      <edge id="14543" label="P05480 (pp) P35438" source="12344" target="12215" cy:directed="1"/>
      <edge id="14542" label="P05480 (pp) P35436" source="12344" target="12220" cy:directed="1"/>
      <edge id="14541" label="Q02248 (pp) P63001" source="12343" target="12398" cy:directed="1"/>
      <edge id="14540" label="Q02248 (pp) Q01097" source="12343" target="12204" cy:directed="1"/>
      <edge id="14539" label="Q02248 (pp) O88712" source="12343" target="12541" cy:directed="1"/>
      <edge id="14538" label="Q02248 (pp) Q68FH0" source="12343" target="12748" cy:directed="1"/>
      <edge id="14537" label="Q02248 (pp) P68510" source="12343" target="12213" cy:directed="1"/>
      <edge id="14536" label="Q02248 (pp) P39688" source="12343" target="12386" cy:directed="1"/>
      <edge id="14535" label="Q02248 (pp) P35438" source="12343" target="12215" cy:directed="1"/>
      <edge id="14534" label="Q02248 (pp) Q61301" source="12343" target="12457" cy:directed="1"/>
      <edge id="14533" label="Q02248 (pp) P05480" source="12343" target="12344" cy:directed="1"/>
      <edge id="14532" label="P60710 (pp) O70589" source="12342" target="12564" cy:directed="1"/>
      <edge id="14531" label="P60710 (pp) Q9JM76" source="12342" target="12378" cy:directed="1"/>
      <edge id="14530" label="P60710 (pp) Q9CPW4" source="12342" target="12514" cy:directed="1"/>
      <edge id="14529" label="P60710 (pp) P16054" source="12342" target="12443" cy:directed="1"/>
      <edge id="14528" label="P60710 (pp) P35438" source="12342" target="12215" cy:directed="1"/>
      <edge id="14527" label="P60710 (pp) Q9D898" source="12342" target="12421" cy:directed="1"/>
      <edge id="14526" label="P60710 (pp) P59999" source="12342" target="12492" cy:directed="1"/>
      <edge id="14525" label="P60710 (pp) Q9R0Q6" source="12342" target="12377" cy:directed="1"/>
      <edge id="14524" label="Q6PHZ2 (pp) P68369" source="12341" target="12348" cy:directed="1"/>
      <edge id="14523" label="Q6PHZ2 (pp) P63101" source="12341" target="12479" cy:directed="1"/>
      <edge id="14522" label="Q6PHZ2 (pp) P35436" source="12341" target="12220" cy:directed="1"/>
      <edge id="14521" label="Q6PHZ2 (pp) P99024" source="12341" target="12567" cy:directed="1"/>
      <edge id="14520" label="Q6PHZ2 (pp) P60710" source="12341" target="12342" cy:directed="1"/>
      <edge id="14519" label="P97807 (pp) P05202" source="12340" target="12216" cy:directed="1"/>
      <edge id="14518" label="P97807 (pp) Q60931" source="12340" target="12556" cy:directed="1"/>
      <edge id="14517" label="P97807 (pp) Q9CQH3" source="12340" target="12240" cy:directed="1"/>
      <edge id="14516" label="P97807 (pp) Q921G7" source="12340" target="12310" cy:directed="1"/>
      <edge id="14515" label="P97807 (pp) Q9CR68" source="12340" target="12267" cy:directed="1"/>
      <edge id="14514" label="P97807 (pp) Q61425" source="12340" target="12314" cy:directed="1"/>
      <edge id="14513" label="P97807 (pp) Q8BMF4" source="12340" target="12253" cy:directed="1"/>
      <edge id="14512" label="P97807 (pp) P06745" source="12340" target="12464" cy:directed="1"/>
      <edge id="14511" label="P97807 (pp) Q9D6J6" source="12340" target="12207" cy:directed="1"/>
      <edge id="14510" label="P97807 (pp) Q9WUM5" source="12340" target="12276" cy:directed="1"/>
      <edge id="14509" label="P97807 (pp) P06151" source="12340" target="12238" cy:directed="1"/>
      <edge id="14508" label="P97807 (pp) Q8K3J1" source="12340" target="12404" cy:directed="1"/>
      <edge id="14507" label="P97807 (pp) Q91YT0" source="12340" target="12379" cy:directed="1"/>
      <edge id="14506" label="P97807 (pp) Q91VR2" source="12340" target="12263" cy:directed="1"/>
      <edge id="14505" label="P97807 (pp) Q05920" source="12340" target="12254" cy:directed="1"/>
      <edge id="14504" label="P97807 (pp) Q60597" source="12340" target="12511" cy:directed="1"/>
      <edge id="14503" label="P97807 (pp) Q9DC69" source="12340" target="12407" cy:directed="1"/>
      <edge id="14502" label="P97807 (pp) Q99LC5" source="12340" target="12315" cy:directed="1"/>
      <edge id="14501" label="P97807 (pp) Q9DCS9" source="12340" target="12266" cy:directed="1"/>
      <edge id="14500" label="P97807 (pp) Q9DCJ5" source="12340" target="12380" cy:directed="1"/>
      <edge id="14499" label="P97807 (pp) Q9DCD0" source="12340" target="12222" cy:directed="1"/>
      <edge id="14498" label="P97807 (pp) O08756" source="12340" target="12383" cy:directed="1"/>
      <edge id="14497" label="P97807 (pp) P48771" source="12340" target="12303" cy:directed="1"/>
      <edge id="14496" label="P97807 (pp) Q9CQQ7" source="12340" target="12409" cy:directed="1"/>
      <edge id="14495" label="P97807 (pp) Q9D6R2" source="12340" target="12236" cy:directed="1"/>
      <edge id="14494" label="P97807 (pp) Q9D2G2" source="12340" target="12287" cy:directed="1"/>
      <edge id="14493" label="P97807 (pp) Q99LX0" source="12340" target="12317" cy:directed="1"/>
      <edge id="14492" label="P97807 (pp) P54071" source="12340" target="12237" cy:directed="1"/>
      <edge id="14491" label="P97807 (pp) Q06185" source="12340" target="12271" cy:directed="1"/>
      <edge id="14490" label="Q9ERS2 (pp) Q9CQH3" source="12339" target="12240" cy:directed="1"/>
      <edge id="14489" label="Q9ERS2 (pp) Q9D6J6" source="12339" target="12207" cy:directed="1"/>
      <edge id="14488" label="Q9ERS2 (pp) O09111" source="12339" target="12211" cy:directed="1"/>
      <edge id="14487" label="Q9ERS2 (pp) Q91VR2" source="12339" target="12263" cy:directed="1"/>
      <edge id="14486" label="Q9ERS2 (pp) P50516" source="12339" target="12293" cy:directed="1"/>
      <edge id="14485" label="Q99KI0 (pp) Q9D6J6" source="12338" target="12207" cy:directed="1"/>
      <edge id="14484" label="Q99KI0 (pp) P05064" source="12338" target="12321" cy:directed="1"/>
      <edge id="14483" label="Q99KI0 (pp) P56480" source="12338" target="12258" cy:directed="1"/>
      <edge id="14482" label="Q99KI0 (pp) P97807" source="12338" target="12340" cy:directed="1"/>
      <edge id="14481" label="Q99KI0 (pp) Q01097" source="12338" target="12204" cy:directed="1"/>
      <edge id="14480" label="Q99KI0 (pp) Q03265" source="12338" target="12212" cy:directed="1"/>
      <edge id="14479" label="Q99KI0 (pp) Q9Z1J3" source="12338" target="12543" cy:directed="1"/>
      <edge id="14478" label="Q99KI0 (pp) P35486" source="12338" target="12439" cy:directed="1"/>
      <edge id="14477" label="Q99KI0 (pp) Q99LX0" source="12338" target="12317" cy:directed="1"/>
      <edge id="14476" label="Q99KI0 (pp) Q60597" source="12338" target="12511" cy:directed="1"/>
      <edge id="14475" label="Q99KI0 (pp) Q9WUM5" source="12338" target="12276" cy:directed="1"/>
      <edge id="14474" label="Q99KI0 (pp) P68510" source="12338" target="12213" cy:directed="1"/>
      <edge id="14473" label="Q99KI0 (pp) Q8K1M6" source="12338" target="12450" cy:directed="1"/>
      <edge id="14472" label="Q99KI0 (pp) Q9CPP6" source="12338" target="12281" cy:directed="1"/>
      <edge id="14471" label="Q99KI0 (pp) Q9D0M3" source="12338" target="12250" cy:directed="1"/>
      <edge id="14470" label="Q99KI0 (pp) Q9DCJ5" source="12338" target="12380" cy:directed="1"/>
      <edge id="14469" label="Q99KI0 (pp) Q9DB20" source="12338" target="12239" cy:directed="1"/>
      <edge id="14468" label="Q99KI0 (pp) P06745" source="12338" target="12464" cy:directed="1"/>
      <edge id="14467" label="Q99KI0 (pp) Q9CR68" source="12338" target="12267" cy:directed="1"/>
      <edge id="14466" label="Q99KI0 (pp) Q91YT0" source="12338" target="12379" cy:directed="1"/>
      <edge id="14465" label="Q99KI0 (pp) Q9ERS2" source="12338" target="12339" cy:directed="1"/>
      <edge id="14464" label="Q99KI0 (pp) Q9D6R2" source="12338" target="12236" cy:directed="1"/>
      <edge id="14463" label="Q99KI0 (pp) O09111" source="12338" target="12211" cy:directed="1"/>
      <edge id="14462" label="Q99KI0 (pp) P70404" source="12338" target="12294" cy:directed="1"/>
      <edge id="14461" label="Q99KI0 (pp) Q9D3D9" source="12338" target="12210" cy:directed="1"/>
      <edge id="14460" label="Q99KI0 (pp) Q05920" source="12338" target="12254" cy:directed="1"/>
      <edge id="14459" label="Q99KI0 (pp) P52480" source="12338" target="12455" cy:directed="1"/>
      <edge id="14458" label="Q99KI0 (pp) P47857" source="12338" target="12531" cy:directed="1"/>
      <edge id="14457" label="Q99KI0 (pp) P54071" source="12338" target="12237" cy:directed="1"/>
      <edge id="14456" label="Q99KI0 (pp) P63038" source="12338" target="12247" cy:directed="1"/>
      <edge id="14455" label="Q99KI0 (pp) Q9CZ13" source="12338" target="12249" cy:directed="1"/>
      <edge id="14454" label="Q99KI0 (pp) Q9DB77" source="12338" target="12405" cy:directed="1"/>
      <edge id="14453" label="Q99KI0 (pp) Q9DC69" source="12338" target="12407" cy:directed="1"/>
      <edge id="14452" label="Q99KI0 (pp) P17751" source="12338" target="12297" cy:directed="1"/>
      <edge id="14451" label="Q99KI0 (pp) Q9CQH3" source="12338" target="12240" cy:directed="1"/>
      <edge id="14450" label="Q99KI0 (pp) Q91VR2" source="12338" target="12263" cy:directed="1"/>
      <edge id="14449" label="Q99KI0 (pp) Q62351" source="12338" target="12399" cy:directed="1"/>
      <edge id="14448" label="Q99KI0 (pp) Q9D2G2" source="12338" target="12287" cy:directed="1"/>
      <edge id="14447" label="O08788 (pp) O35465" source="12337" target="12446" cy:directed="1"/>
      <edge id="14446" label="Q99KJ8 (pp) P28667" source="12336" target="12617" cy:directed="1"/>
      <edge id="14445" label="Q99KJ8 (pp) O08788" source="12336" target="12337" cy:directed="1"/>
      <edge id="14444" label="Q91Z53 (pp) P45376" source="12335" target="12611" cy:directed="1"/>
      <edge id="14443" label="P26443 (pp) Q9DCD0" source="12334" target="12222" cy:directed="1"/>
      <edge id="14442" label="P26443 (pp) P54071" source="12334" target="12237" cy:directed="1"/>
      <edge id="14441" label="P26443 (pp) P48320" source="12334" target="12323" cy:directed="1"/>
      <edge id="14440" label="P26443 (pp) Q99KI0" source="12334" target="12338" cy:directed="1"/>
      <edge id="14439" label="P26443 (pp) P63038" source="12334" target="12247" cy:directed="1"/>
      <edge id="14438" label="P26443 (pp) P56480" source="12334" target="12258" cy:directed="1"/>
      <edge id="14437" label="P26443 (pp) P70404" source="12334" target="12294" cy:directed="1"/>
      <edge id="14436" label="P26443 (pp) Q60597" source="12334" target="12511" cy:directed="1"/>
      <edge id="14435" label="P26443 (pp) P17751" source="12334" target="12297" cy:directed="1"/>
      <edge id="14434" label="P26443 (pp) P61922" source="12334" target="12324" cy:directed="1"/>
      <edge id="14433" label="P26443 (pp) Q05920" source="12334" target="12254" cy:directed="1"/>
      <edge id="14432" label="P26443 (pp) P05063" source="12334" target="12512" cy:directed="1"/>
      <edge id="14431" label="P26443 (pp) P29758" source="12334" target="12503" cy:directed="1"/>
      <edge id="14430" label="P26443 (pp) Q8CHT0" source="12334" target="12502" cy:directed="1"/>
      <edge id="14429" label="P26443 (pp) Q8BH04" source="12334" target="12624" cy:directed="1"/>
      <edge id="14428" label="P26443 (pp) Q9D6R2" source="12334" target="12236" cy:directed="1"/>
      <edge id="14427" label="P26443 (pp) P15105" source="12334" target="12282" cy:directed="1"/>
      <edge id="14426" label="P26443 (pp) P05202" source="12334" target="12216" cy:directed="1"/>
      <edge id="14425" label="P26443 (pp) P97807" source="12334" target="12340" cy:directed="1"/>
      <edge id="14424" label="P26443 (pp) Q61425" source="12334" target="12314" cy:directed="1"/>
      <edge id="14423" label="P26443 (pp) Q91Z53" source="12334" target="12335" cy:directed="1"/>
      <edge id="14422" label="Q62442 (pp) P61264" source="12333" target="12467" cy:directed="1"/>
      <edge id="14421" label="Q9D172 (pp) Q9DC70" source="12332" target="12272" cy:directed="1"/>
      <edge id="14420" label="Q9D172 (pp) P42125" source="12332" target="12519" cy:directed="1"/>
      <edge id="14419" label="Q9D172 (pp) Q9DCJ5" source="12332" target="12380" cy:directed="1"/>
      <edge id="14418" label="Q9D172 (pp) Q8BH95" source="12332" target="12248" cy:directed="1"/>
      <edge id="14417" label="Q9D172 (pp) Q91WD5" source="12332" target="12346" cy:directed="1"/>
      <edge id="14416" label="Q9D172 (pp) Q9CZ13" source="12332" target="12249" cy:directed="1"/>
      <edge id="14415" label="Q9D172 (pp) Q9DCT2" source="12332" target="12233" cy:directed="1"/>
      <edge id="14414" label="Q9D172 (pp) Q9CQZ5" source="12332" target="12206" cy:directed="1"/>
      <edge id="14413" label="Q9D172 (pp) Q91YT0" source="12332" target="12379" cy:directed="1"/>
      <edge id="14412" label="Q9D172 (pp) P97807" source="12332" target="12340" cy:directed="1"/>
      <edge id="14411" label="Q9D172 (pp) Q9CQH3" source="12332" target="12240" cy:directed="1"/>
      <edge id="14410" label="P56391 (pp) Q9DCX2" source="12331" target="12366" cy:directed="1"/>
      <edge id="14409" label="P56391 (pp) P17665" source="12331" target="12555" cy:directed="1"/>
      <edge id="14408" label="P56391 (pp) P00405" source="12331" target="12669" cy:directed="1"/>
      <edge id="14407" label="P56391 (pp) Q9ERS2" source="12331" target="12339" cy:directed="1"/>
      <edge id="14406" label="P56391 (pp) Q9D3D9" source="12331" target="12210" cy:directed="1"/>
      <edge id="14405" label="P56391 (pp) O09111" source="12331" target="12211" cy:directed="1"/>
      <edge id="14404" label="Q9WV18 (pp) Q80T41" source="12330" target="12422" cy:directed="1"/>
      <edge id="14403" label="O35526 (pp) O08599" source="12329" target="12674" cy:directed="1"/>
      <edge id="14402" label="O35526 (pp) P60879" source="12329" target="12381" cy:directed="1"/>
      <edge id="14401" label="O35526 (pp) P63040" source="12329" target="12461" cy:directed="1"/>
      <edge id="14400" label="O35526 (pp) Q62442" source="12329" target="12333" cy:directed="1"/>
      <edge id="14399" label="Q8R5M8 (pp) O70589" source="12328" target="12564" cy:directed="1"/>
      <edge id="14398" label="Q9WV92 (pp) P12023" source="12327" target="12325" cy:directed="1"/>
      <edge id="14397" label="Q9WV92 (pp) Q8R5M8" source="12327" target="12328" cy:directed="1"/>
      <edge id="14396" label="P62814 (pp) Q9Z1G4" source="12326" target="12275" cy:directed="1"/>
      <edge id="14395" label="P62814 (pp) Q9WTT4" source="12326" target="12489" cy:directed="1"/>
      <edge id="14394" label="P62814 (pp) P50518" source="12326" target="12369" cy:directed="1"/>
      <edge id="14393" label="P62814 (pp) Q91VM9" source="12326" target="12406" cy:directed="1"/>
      <edge id="14392" label="P62814 (pp) P63082" source="12326" target="12448" cy:directed="1"/>
      <edge id="14391" label="P62814 (pp) Q9Z1G3" source="12326" target="12224" cy:directed="1"/>
      <edge id="14390" label="P62814 (pp) Q9DC69" source="12326" target="12407" cy:directed="1"/>
      <edge id="14389" label="P62814 (pp) P57746" source="12326" target="12292" cy:directed="1"/>
      <edge id="14388" label="P62814 (pp) Q8BVE3" source="12326" target="12370" cy:directed="1"/>
      <edge id="14387" label="P62814 (pp) P50516" source="12326" target="12293" cy:directed="1"/>
      <edge id="14386" label="P62814 (pp) P51863" source="12326" target="12223" cy:directed="1"/>
      <edge id="14385" label="P12023 (pp) P61264" source="12325" target="12467" cy:directed="1"/>
      <edge id="14384" label="P12023 (pp) P63017" source="12325" target="12420" cy:directed="1"/>
      <edge id="14383" label="P12023 (pp) P11627" source="12325" target="12561" cy:directed="1"/>
      <edge id="14382" label="P12023 (pp) Q61316" source="12325" target="12741" cy:directed="1"/>
      <edge id="14381" label="P12023 (pp) Q9CQV8" source="12325" target="12357" cy:directed="1"/>
      <edge id="14380" label="P12023 (pp) Q9Z1G4" source="12325" target="12275" cy:directed="1"/>
      <edge id="14379" label="P12023 (pp) Q68FD5" source="12325" target="12376" cy:directed="1"/>
      <edge id="14378" label="P12023 (pp) P01831" source="12325" target="12619" cy:directed="1"/>
      <edge id="14377" label="P12023 (pp) Q62420" source="12325" target="12471" cy:directed="1"/>
      <edge id="14376" label="P12023 (pp) P97300" source="12325" target="12744" cy:directed="1"/>
      <edge id="14375" label="P12023 (pp) O55042" source="12325" target="12616" cy:directed="1"/>
      <edge id="14374" label="P12023 (pp) P60879" source="12325" target="12381" cy:directed="1"/>
      <edge id="14373" label="P12023 (pp) P46660" source="12325" target="12401" cy:directed="1"/>
      <edge id="14372" label="P12023 (pp) Q812A2" source="12325" target="12800" cy:directed="1"/>
      <edge id="14371" label="P12023 (pp) O54991" source="12325" target="12610" cy:directed="1"/>
      <edge id="14370" label="P12023 (pp) P28652" source="12325" target="12576" cy:directed="1"/>
      <edge id="14369" label="P12023 (pp) Q91ZZ3" source="12325" target="12798" cy:directed="1"/>
      <edge id="14368" label="P12023 (pp) P57780" source="12325" target="12734" cy:directed="1"/>
      <edge id="14367" label="P12023 (pp) P46096" source="12325" target="12690" cy:directed="1"/>
      <edge id="14366" label="P12023 (pp) P62821" source="12325" target="12648" cy:directed="1"/>
      <edge id="14365" label="P12023 (pp) P08551" source="12325" target="12715" cy:directed="1"/>
      <edge id="14364" label="P12023 (pp) P12960" source="12325" target="12719" cy:directed="1"/>
      <edge id="14363" label="P12023 (pp) P39053" source="12325" target="12497" cy:directed="1"/>
      <edge id="14362" label="P12023 (pp) O08599" source="12325" target="12674" cy:directed="1"/>
      <edge id="14361" label="P12023 (pp) P68510" source="12325" target="12213" cy:directed="1"/>
      <edge id="14360" label="P12023 (pp) P60710" source="12325" target="12342" cy:directed="1"/>
      <edge id="14359" label="P12023 (pp) P63101" source="12325" target="12479" cy:directed="1"/>
      <edge id="14358" label="P12023 (pp) Q9JIS5" source="12325" target="12593" cy:directed="1"/>
      <edge id="14357" label="P12023 (pp) P13595" source="12325" target="12562" cy:directed="1"/>
      <edge id="14356" label="P12023 (pp) O88737" source="12325" target="12495" cy:directed="1"/>
      <edge id="14355" label="P12023 (pp) P61982" source="12325" target="12509" cy:directed="1"/>
      <edge id="14354" label="P12023 (pp) P07901" source="12325" target="12508" cy:directed="1"/>
      <edge id="14353" label="P12023 (pp) O88935" source="12325" target="12431" cy:directed="1"/>
      <edge id="14352" label="P12023 (pp) Q64332" source="12325" target="12598" cy:directed="1"/>
      <edge id="14351" label="P12023 (pp) P56564" source="12325" target="12668" cy:directed="1"/>
      <edge id="14350" label="P12023 (pp) P35564" source="12325" target="12687" cy:directed="1"/>
      <edge id="14349" label="P12023 (pp) Q60932" source="12325" target="12606" cy:directed="1"/>
      <edge id="14348" label="P12023 (pp) Q61548" source="12325" target="12418" cy:directed="1"/>
      <edge id="14347" label="P12023 (pp) Q9D6F9" source="12325" target="12627" cy:directed="1"/>
      <edge id="14346" label="P12023 (pp) P62259" source="12325" target="12225" cy:directed="1"/>
      <edge id="14345" label="P12023 (pp) Q810U3" source="12325" target="12661" cy:directed="1"/>
      <edge id="14344" label="P12023 (pp) Q9Z1G3" source="12325" target="12224" cy:directed="1"/>
      <edge id="14343" label="P12023 (pp) Q62277" source="12325" target="12354" cy:directed="1"/>
      <edge id="14342" label="P12023 (pp) Q9JHU4" source="12325" target="12402" cy:directed="1"/>
      <edge id="14341" label="P12023 (pp) Q8VDN2" source="12325" target="12484" cy:directed="1"/>
      <edge id="14340" label="P12023 (pp) P68254" source="12325" target="12580" cy:directed="1"/>
      <edge id="14339" label="P12023 (pp) O08756" source="12325" target="12383" cy:directed="1"/>
      <edge id="14338" label="P12023 (pp) O35526" source="12325" target="12329" cy:directed="1"/>
      <edge id="14337" label="P12023 (pp) P63011" source="12325" target="12547" cy:directed="1"/>
      <edge id="14336" label="P12023 (pp) P06837" source="12325" target="12507" cy:directed="1"/>
      <edge id="14335" label="P12023 (pp) Q9CZT8" source="12325" target="12438" cy:directed="1"/>
      <edge id="14334" label="P12023 (pp) P62823" source="12325" target="12432" cy:directed="1"/>
      <edge id="14333" label="P12023 (pp) P63044" source="12325" target="12400" cy:directed="1"/>
      <edge id="14332" label="P12023 (pp) P04925" source="12325" target="12385" cy:directed="1"/>
      <edge id="14331" label="P12023 (pp) Q9WV18" source="12325" target="12330" cy:directed="1"/>
      <edge id="14330" label="P12023 (pp) P46460" source="12325" target="12283" cy:directed="1"/>
      <edge id="14329" label="P61922 (pp) Q9EQ20" source="12324" target="12362" cy:directed="1"/>
      <edge id="14328" label="P61922 (pp) P15105" source="12324" target="12282" cy:directed="1"/>
      <edge id="14327" label="P61922 (pp) Q9DBF1" source="12324" target="12482" cy:directed="1"/>
      <edge id="14326" label="P48320 (pp) P15105" source="12323" target="12282" cy:directed="1"/>
      <edge id="14325" label="P48320 (pp) P61922" source="12323" target="12324" cy:directed="1"/>
      <edge id="14324" label="P17710 (pp) Q9WUA3" source="12322" target="12510" cy:directed="1"/>
      <edge id="14323" label="P05064 (pp) P05063" source="12321" target="12512" cy:directed="1"/>
      <edge id="14322" label="P05064 (pp) Q61735" source="12321" target="12367" cy:directed="1"/>
      <edge id="14321" label="P05064 (pp) P17182" source="12321" target="12515" cy:directed="1"/>
      <edge id="14320" label="P05064 (pp) Q9WUA3" source="12321" target="12510" cy:directed="1"/>
      <edge id="14319" label="P05064 (pp) P17710" source="12321" target="12322" cy:directed="1"/>
      <edge id="14318" label="P11499 (pp) Q9CR16" source="12320" target="12735" cy:directed="1"/>
      <edge id="14317" label="P11499 (pp) P60710" source="12320" target="12342" cy:directed="1"/>
      <edge id="14316" label="P11499 (pp) P63037" source="12320" target="12279" cy:directed="1"/>
      <edge id="14315" label="P11499 (pp) P63038" source="12320" target="12247" cy:directed="1"/>
      <edge id="14314" label="P11499 (pp) Q60864" source="12320" target="12374" cy:directed="1"/>
      <edge id="14313" label="P11499 (pp) P62259" source="12320" target="12225" cy:directed="1"/>
      <edge id="14312" label="Q8K1Z0 (pp) Q9ERS2" source="12319" target="12339" cy:directed="1"/>
      <edge id="14311" label="Q8K1Z0 (pp) Q9D6J6" source="12319" target="12207" cy:directed="1"/>
      <edge id="14310" label="Q8K1Z0 (pp) Q9WUM5" source="12319" target="12276" cy:directed="1"/>
      <edge id="14309" label="Q8K1Z0 (pp) Q9DCJ5" source="12319" target="12380" cy:directed="1"/>
      <edge id="14308" label="P62331 (pp) O70161" source="12318" target="12308" cy:directed="1"/>
      <edge id="14307" label="Q99LX0 (pp) Q9CQH3" source="12317" target="12240" cy:directed="1"/>
      <edge id="14306" label="Q99LX0 (pp) Q91VR2" source="12317" target="12263" cy:directed="1"/>
      <edge id="14305" label="Q99LX0 (pp) O08756" source="12317" target="12383" cy:directed="1"/>
      <edge id="14304" label="Q99LX0 (pp) O55042" source="12317" target="12616" cy:directed="1"/>
      <edge id="14303" label="Q99LX0 (pp) Q9D6J6" source="12317" target="12207" cy:directed="1"/>
      <edge id="14302" label="Q99LX0 (pp) O09111" source="12317" target="12211" cy:directed="1"/>
      <edge id="14301" label="Q99LX0 (pp) Q62277" source="12317" target="12354" cy:directed="1"/>
      <edge id="14300" label="Q8BGH2 (pp) Q91YT0" source="12316" target="12379" cy:directed="1"/>
      <edge id="14299" label="Q8BGH2 (pp) Q9WUM5" source="12316" target="12276" cy:directed="1"/>
      <edge id="14298" label="Q8BGH2 (pp) Q9DCJ5" source="12316" target="12380" cy:directed="1"/>
      <edge id="14297" label="Q8BGH2 (pp) Q9CRB9" source="12316" target="12650" cy:directed="1"/>
      <edge id="14296" label="Q8BGH2 (pp) P97807" source="12316" target="12340" cy:directed="1"/>
      <edge id="14295" label="Q8BGH2 (pp) O88441" source="12316" target="12295" cy:directed="1"/>
      <edge id="14294" label="Q8BGH2 (pp) Q9QYA2" source="12316" target="12761" cy:directed="1"/>
      <edge id="14293" label="Q8BGH2 (pp) Q9DC69" source="12316" target="12407" cy:directed="1"/>
      <edge id="14292" label="Q8BGH2 (pp) Q9CZ13" source="12316" target="12249" cy:directed="1"/>
      <edge id="14291" label="Q8BGH2 (pp) Q8CAQ8" source="12316" target="12553" cy:directed="1"/>
      <edge id="14290" label="Q8BGH2 (pp) Q8BH95" source="12316" target="12248" cy:directed="1"/>
      <edge id="14289" label="Q8BGH2 (pp) Q99LX0" source="12316" target="12317" cy:directed="1"/>
      <edge id="14288" label="Q99LC5 (pp) Q9DC69" source="12315" target="12407" cy:directed="1"/>
      <edge id="14287" label="Q99LC5 (pp) O88441" source="12315" target="12295" cy:directed="1"/>
      <edge id="14286" label="Q99LC5 (pp) Q9CR68" source="12315" target="12267" cy:directed="1"/>
      <edge id="14285" label="Q99LC5 (pp) Q9WUM5" source="12315" target="12276" cy:directed="1"/>
      <edge id="14284" label="Q99LC5 (pp) Q8BWT1" source="12315" target="12311" cy:directed="1"/>
      <edge id="14283" label="Q99LC5 (pp) Q9Z0X1" source="12315" target="12550" cy:directed="1"/>
      <edge id="14282" label="Q99LC5 (pp) Q91YT0" source="12315" target="12379" cy:directed="1"/>
      <edge id="14281" label="Q99LC5 (pp) O08756" source="12315" target="12383" cy:directed="1"/>
      <edge id="14280" label="Q99LC5 (pp) Q99JY0" source="12315" target="12384" cy:directed="1"/>
      <edge id="14279" label="Q99LC5 (pp) Q9DBL1" source="12315" target="12451" cy:directed="1"/>
      <edge id="14278" label="Q99LC5 (pp) Q91VR2" source="12315" target="12263" cy:directed="1"/>
      <edge id="14277" label="Q99LC5 (pp) Q80U28" source="12315" target="12659" cy:directed="1"/>
      <edge id="14276" label="Q99LC5 (pp) Q9CQH3" source="12315" target="12240" cy:directed="1"/>
      <edge id="14275" label="Q99LC5 (pp) Q91ZJ5" source="12315" target="12614" cy:directed="1"/>
      <edge id="14274" label="Q99LC5 (pp) Q6PB66" source="12315" target="12498" cy:directed="1"/>
      <edge id="14273" label="Q99LC5 (pp) Q9DCJ5" source="12315" target="12380" cy:directed="1"/>
      <edge id="14272" label="Q99LC5 (pp) Q9D6J6" source="12315" target="12207" cy:directed="1"/>
      <edge id="14271" label="Q99LC5 (pp) P50544" source="12315" target="12459" cy:directed="1"/>
      <edge id="14270" label="Q99LC5 (pp) O09111" source="12315" target="12211" cy:directed="1"/>
      <edge id="14269" label="Q61425 (pp) Q9EQ20" source="12314" target="12362" cy:directed="1"/>
      <edge id="14268" label="Q61425 (pp) Q8QZT1" source="12314" target="12557" cy:directed="1"/>
      <edge id="14267" label="Q61425 (pp) P47738" source="12314" target="12305" cy:directed="1"/>
      <edge id="14266" label="Q61425 (pp) O08756" source="12314" target="12383" cy:directed="1"/>
      <edge id="14265" label="Q61425 (pp) Q99JY0" source="12314" target="12384" cy:directed="1"/>
      <edge id="14264" label="Q61425 (pp) Q8BWT1" source="12314" target="12311" cy:directed="1"/>
      <edge id="14263" label="Q61425 (pp) Q9CQ62" source="12314" target="12285" cy:directed="1"/>
      <edge id="14262" label="Q61425 (pp) Q8BMS1" source="12314" target="12516" cy:directed="1"/>
      <edge id="14261" label="Q61425 (pp) Q9CZS1" source="12314" target="12412" cy:directed="1"/>
      <edge id="14260" label="Q61425 (pp) Q9D0K2" source="12314" target="12277" cy:directed="1"/>
      <edge id="14259" label="Q61425 (pp) Q9DBL1" source="12314" target="12451" cy:directed="1"/>
      <edge id="14258" label="Q61425 (pp) Q9WUM5" source="12314" target="12276" cy:directed="1"/>
      <edge id="14257" label="Q61425 (pp) Q99LC5" source="12314" target="12315" cy:directed="1"/>
      <edge id="14256" label="P12787 (pp) P56480" source="12313" target="12258" cy:directed="1"/>
      <edge id="14255" label="P12787 (pp) Q06185" source="12313" target="12271" cy:directed="1"/>
      <edge id="14254" label="P12787 (pp) Q9CXZ1" source="12313" target="12396" cy:directed="1"/>
      <edge id="14253" label="P12787 (pp) Q9CQZ6" source="12313" target="12231" cy:directed="1"/>
      <edge id="14252" label="P12787 (pp) P19536" source="12313" target="12373" cy:directed="1"/>
      <edge id="14251" label="P12787 (pp) P43024" source="12313" target="12472" cy:directed="1"/>
      <edge id="14250" label="P12787 (pp) Q9DB77" source="12313" target="12405" cy:directed="1"/>
      <edge id="14249" label="P12787 (pp) Q9CQA3" source="12313" target="12312" cy:directed="1"/>
      <edge id="14248" label="P12787 (pp) Q9D855" source="12313" target="12403" cy:directed="1"/>
      <edge id="14247" label="P12787 (pp) Q03265" source="12313" target="12212" cy:directed="1"/>
      <edge id="14246" label="P12787 (pp) P09671" source="12313" target="12444" cy:directed="1"/>
      <edge id="14245" label="P12787 (pp) Q9CQH3" source="12313" target="12240" cy:directed="1"/>
      <edge id="14244" label="P12787 (pp) Q9DCX2" source="12313" target="12366" cy:directed="1"/>
      <edge id="14243" label="P12787 (pp) Q99LC3" source="12313" target="12251" cy:directed="1"/>
      <edge id="14242" label="P12787 (pp) Q91VR2" source="12313" target="12263" cy:directed="1"/>
      <edge id="14241" label="P12787 (pp) Q9CQ54" source="12313" target="12232" cy:directed="1"/>
      <edge id="14240" label="P12787 (pp) Q9DC70" source="12313" target="12272" cy:directed="1"/>
      <edge id="14239" label="P12787 (pp) Q9CPQ1" source="12313" target="12604" cy:directed="1"/>
      <edge id="14238" label="P12787 (pp) Q9CQJ8" source="12313" target="12270" cy:directed="1"/>
      <edge id="14237" label="P12787 (pp) Q9CQ69" source="12313" target="12234" cy:directed="1"/>
      <edge id="14236" label="P12787 (pp) Q9D6J5" source="12313" target="12487" cy:directed="1"/>
      <edge id="14235" label="P12787 (pp) Q9D0M3" source="12313" target="12250" cy:directed="1"/>
      <edge id="14234" label="P12787 (pp) Q9DCJ5" source="12313" target="12380" cy:directed="1"/>
      <edge id="14233" label="P12787 (pp) Q9CQZ5" source="12313" target="12206" cy:directed="1"/>
      <edge id="14232" label="P12787 (pp) P00405" source="12313" target="12669" cy:directed="1"/>
      <edge id="14231" label="P12787 (pp) Q9DB20" source="12313" target="12239" cy:directed="1"/>
      <edge id="14230" label="P12787 (pp) Q9D6J6" source="12313" target="12207" cy:directed="1"/>
      <edge id="14229" label="P12787 (pp) Q9CQQ7" source="12313" target="12409" cy:directed="1"/>
      <edge id="14228" label="P12787 (pp) P19783" source="12313" target="12245" cy:directed="1"/>
      <edge id="14227" label="P12787 (pp) Q9ERS2" source="12313" target="12339" cy:directed="1"/>
      <edge id="14226" label="P12787 (pp) P56391" source="12313" target="12331" cy:directed="1"/>
      <edge id="14225" label="P12787 (pp) Q9DCT2" source="12313" target="12233" cy:directed="1"/>
      <edge id="14224" label="P12787 (pp) P97450" source="12313" target="12430" cy:directed="1"/>
      <edge id="14223" label="P12787 (pp) Q9DCW4" source="12313" target="12280" cy:directed="1"/>
      <edge id="14222" label="P12787 (pp) Q9DC69" source="12313" target="12407" cy:directed="1"/>
      <edge id="14221" label="P12787 (pp) P17665" source="12313" target="12555" cy:directed="1"/>
      <edge id="14220" label="P12787 (pp) Q8VEM8" source="12313" target="12349" cy:directed="1"/>
      <edge id="14219" label="P12787 (pp) Q7TMF3" source="12313" target="12365" cy:directed="1"/>
      <edge id="14218" label="P12787 (pp) Q8K3J1" source="12313" target="12404" cy:directed="1"/>
      <edge id="14217" label="P12787 (pp) Q9D3D9" source="12313" target="12210" cy:directed="1"/>
      <edge id="14216" label="P12787 (pp) Q99LC5" source="12313" target="12315" cy:directed="1"/>
      <edge id="14215" label="P12787 (pp) Q9DCS9" source="12313" target="12266" cy:directed="1"/>
      <edge id="14214" label="P12787 (pp) Q9D6R2" source="12313" target="12236" cy:directed="1"/>
      <edge id="14213" label="P12787 (pp) P52503" source="12313" target="12352" cy:directed="1"/>
      <edge id="14212" label="P12787 (pp) Q9CR68" source="12313" target="12267" cy:directed="1"/>
      <edge id="14211" label="Q9CQA3 (pp) Q60597" source="12312" target="12511" cy:directed="1"/>
      <edge id="14210" label="Q9CQA3 (pp) P08249" source="12312" target="12235" cy:directed="1"/>
      <edge id="14209" label="Q9CQA3 (pp) Q9CQJ8" source="12312" target="12270" cy:directed="1"/>
      <edge id="14208" label="Q9CQA3 (pp) Q9ERS2" source="12312" target="12339" cy:directed="1"/>
      <edge id="14207" label="Q9CQA3 (pp) P99029" source="12312" target="12356" cy:directed="1"/>
      <edge id="14206" label="Q9CQA3 (pp) P19536" source="12312" target="12373" cy:directed="1"/>
      <edge id="14205" label="Q9CQA3 (pp) Q99LX0" source="12312" target="12317" cy:directed="1"/>
      <edge id="14204" label="Q9CQA3 (pp) Q9D3D9" source="12312" target="12210" cy:directed="1"/>
      <edge id="14203" label="Q9CQA3 (pp) O09111" source="12312" target="12211" cy:directed="1"/>
      <edge id="14202" label="Q9CQA3 (pp) P43024" source="12312" target="12472" cy:directed="1"/>
      <edge id="14201" label="Q9CQA3 (pp) P17751" source="12312" target="12297" cy:directed="1"/>
      <edge id="14200" label="Q9CQA3 (pp) Q9CQ69" source="12312" target="12234" cy:directed="1"/>
      <edge id="14199" label="Q9CQA3 (pp) Q9DC70" source="12312" target="12272" cy:directed="1"/>
      <edge id="14198" label="Q9CQA3 (pp) Q9D6R2" source="12312" target="12236" cy:directed="1"/>
      <edge id="14197" label="Q9CQA3 (pp) P19783" source="12312" target="12245" cy:directed="1"/>
      <edge id="14196" label="Q9CQA3 (pp) Q91WD5" source="12312" target="12346" cy:directed="1"/>
      <edge id="14195" label="Q9CQA3 (pp) Q9CPP6" source="12312" target="12281" cy:directed="1"/>
      <edge id="14194" label="Q9CQA3 (pp) Q9DCD0" source="12312" target="12222" cy:directed="1"/>
      <edge id="14193" label="Q9CQA3 (pp) P97450" source="12312" target="12430" cy:directed="1"/>
      <edge id="14192" label="Q9CQA3 (pp) P56480" source="12312" target="12258" cy:directed="1"/>
      <edge id="14191" label="Q9CQA3 (pp) Q9DCX2" source="12312" target="12366" cy:directed="1"/>
      <edge id="14190" label="Q9CQA3 (pp) Q91YT0" source="12312" target="12379" cy:directed="1"/>
      <edge id="14189" label="Q9CQA3 (pp) Q8VEM8" source="12312" target="12349" cy:directed="1"/>
      <edge id="14188" label="Q9CQA3 (pp) Q64521" source="12312" target="12425" cy:directed="1"/>
      <edge id="14187" label="Q9CQA3 (pp) Q61425" source="12312" target="12314" cy:directed="1"/>
      <edge id="14186" label="Q9CQA3 (pp) Q91VR2" source="12312" target="12263" cy:directed="1"/>
      <edge id="14185" label="Q9CQA3 (pp) Q03265" source="12312" target="12212" cy:directed="1"/>
      <edge id="14184" label="Q9CQA3 (pp) Q7TMF3" source="12312" target="12365" cy:directed="1"/>
      <edge id="14183" label="Q9CQA3 (pp) Q9CQQ7" source="12312" target="12409" cy:directed="1"/>
      <edge id="14182" label="Q9CQA3 (pp) Q99LC5" source="12312" target="12315" cy:directed="1"/>
      <edge id="14181" label="Q9CQA3 (pp) Q9CQZ5" source="12312" target="12206" cy:directed="1"/>
      <edge id="14180" label="Q9CQA3 (pp) P20108" source="12312" target="12427" cy:directed="1"/>
      <edge id="14179" label="Q9CQA3 (pp) Q9D6J6" source="12312" target="12207" cy:directed="1"/>
      <edge id="14178" label="Q9CQA3 (pp) Q91VD9" source="12312" target="12265" cy:directed="1"/>
      <edge id="14177" label="Q9CQA3 (pp) Q9CR68" source="12312" target="12267" cy:directed="1"/>
      <edge id="14176" label="Q9CQA3 (pp) Q8K2B3" source="12312" target="12347" cy:directed="1"/>
      <edge id="14175" label="Q9CQA3 (pp) Q9CQ75" source="12312" target="12389" cy:directed="1"/>
      <edge id="14174" label="Q9CQA3 (pp) Q9DB77" source="12312" target="12405" cy:directed="1"/>
      <edge id="14173" label="Q9CQA3 (pp) P56391" source="12312" target="12331" cy:directed="1"/>
      <edge id="14172" label="Q9CQA3 (pp) Q9D6J5" source="12312" target="12487" cy:directed="1"/>
      <edge id="14171" label="Q9CQA3 (pp) Q9WUM5" source="12312" target="12276" cy:directed="1"/>
      <edge id="14170" label="Q9CQA3 (pp) Q9DC69" source="12312" target="12407" cy:directed="1"/>
      <edge id="14169" label="Q9CQA3 (pp) P52503" source="12312" target="12352" cy:directed="1"/>
      <edge id="14168" label="Q9CQA3 (pp) Q9CQH3" source="12312" target="12240" cy:directed="1"/>
      <edge id="14167" label="Q9CQA3 (pp) Q9CPQ1" source="12312" target="12604" cy:directed="1"/>
      <edge id="14166" label="Q9CQA3 (pp) P70404" source="12312" target="12294" cy:directed="1"/>
      <edge id="14165" label="Q9CQA3 (pp) P97807" source="12312" target="12340" cy:directed="1"/>
      <edge id="14164" label="Q9CQA3 (pp) Q9D855" source="12312" target="12403" cy:directed="1"/>
      <edge id="14163" label="Q9CQA3 (pp) Q9DB20" source="12312" target="12239" cy:directed="1"/>
      <edge id="14162" label="Q9CQA3 (pp) Q9CQ62" source="12312" target="12285" cy:directed="1"/>
      <edge id="14161" label="Q9CQA3 (pp) Q99KI0" source="12312" target="12338" cy:directed="1"/>
      <edge id="14160" label="Q9CQA3 (pp) P54071" source="12312" target="12237" cy:directed="1"/>
      <edge id="14159" label="Q9CQA3 (pp) Q9DCJ5" source="12312" target="12380" cy:directed="1"/>
      <edge id="14158" label="Q9CQA3 (pp) Q9D2G2" source="12312" target="12287" cy:directed="1"/>
      <edge id="14157" label="Q9CQA3 (pp) Q9CQZ6" source="12312" target="12231" cy:directed="1"/>
      <edge id="14156" label="Q9CQA3 (pp) Q9DCS9" source="12312" target="12266" cy:directed="1"/>
      <edge id="14155" label="Q9CQA3 (pp) Q9Z1P6" source="12312" target="12299" cy:directed="1"/>
      <edge id="14154" label="Q9CQA3 (pp) Q9Z2I9" source="12312" target="12458" cy:directed="1"/>
      <edge id="14153" label="Q9CQA3 (pp) Q8K3J1" source="12312" target="12404" cy:directed="1"/>
      <edge id="14152" label="Q9CQA3 (pp) Q06185" source="12312" target="12271" cy:directed="1"/>
      <edge id="14151" label="Q9CQA3 (pp) Q9CZ13" source="12312" target="12249" cy:directed="1"/>
      <edge id="14150" label="Q9CQA3 (pp) Q9D0M3" source="12312" target="12250" cy:directed="1"/>
      <edge id="14149" label="Q8BWT1 (pp) Q91ZA3" source="12311" target="12477" cy:directed="1"/>
      <edge id="14148" label="Q8BWT1 (pp) O08756" source="12311" target="12383" cy:directed="1"/>
      <edge id="14147" label="Q8BWT1 (pp) Q9WUM5" source="12311" target="12276" cy:directed="1"/>
      <edge id="14146" label="Q8BWT1 (pp) Q8BMS1" source="12311" target="12516" cy:directed="1"/>
      <edge id="14145" label="Q8BWT1 (pp) Q99JY0" source="12311" target="12384" cy:directed="1"/>
      <edge id="14144" label="Q8BWT1 (pp) Q9EQ20" source="12311" target="12362" cy:directed="1"/>
      <edge id="14143" label="Q8BWT1 (pp) Q9DBL1" source="12311" target="12451" cy:directed="1"/>
      <edge id="14142" label="Q8BWT1 (pp) Q9D0K2" source="12311" target="12277" cy:directed="1"/>
      <edge id="14141" label="Q921G7 (pp) Q99LC5" source="12310" target="12315" cy:directed="1"/>
      <edge id="14140" label="Q921G7 (pp) Q9CQ62" source="12310" target="12285" cy:directed="1"/>
      <edge id="14139" label="Q921G7 (pp) Q80U28" source="12310" target="12659" cy:directed="1"/>
      <edge id="14138" label="Q921G7 (pp) Q9WUM5" source="12310" target="12276" cy:directed="1"/>
      <edge id="14137" label="Q921G7 (pp) Q99JY0" source="12310" target="12384" cy:directed="1"/>
      <edge id="14136" label="Q921G7 (pp) Q9D6J6" source="12310" target="12207" cy:directed="1"/>
      <edge id="14135" label="Q921G7 (pp) Q8BMS1" source="12310" target="12516" cy:directed="1"/>
      <edge id="14134" label="Q921G7 (pp) Q61425" source="12310" target="12314" cy:directed="1"/>
      <edge id="14133" label="Q921G7 (pp) Q8BWT1" source="12310" target="12311" cy:directed="1"/>
      <edge id="14132" label="Q9Z1B3 (pp) P35438" source="12309" target="12215" cy:directed="1"/>
      <edge id="14131" label="Q9Z1B3 (pp) Q01097" source="12309" target="12204" cy:directed="1"/>
      <edge id="14130" label="O70161 (pp) Q71LX4" source="12308" target="12697" cy:directed="1"/>
      <edge id="14129" label="O70161 (pp) P17426" source="12308" target="12291" cy:directed="1"/>
      <edge id="14128" label="O70161 (pp) Q9Z1B3" source="12308" target="12309" cy:directed="1"/>
      <edge id="14127" label="Q6PER3 (pp) O08788" source="12307" target="12337" cy:directed="1"/>
      <edge id="14126" label="P63005 (pp) P20357" source="12306" target="12620" cy:directed="1"/>
      <edge id="14125" label="P63005 (pp) Q99KJ8" source="12306" target="12336" cy:directed="1"/>
      <edge id="14124" label="P63005 (pp) O08788" source="12306" target="12337" cy:directed="1"/>
      <edge id="14123" label="P63005 (pp) Q6PER3" source="12306" target="12307" cy:directed="1"/>
      <edge id="14122" label="P47738 (pp) Q8BW75" source="12305" target="12673" cy:directed="1"/>
      <edge id="14121" label="P47738 (pp) Q9EQ20" source="12305" target="12362" cy:directed="1"/>
      <edge id="14120" label="P47738 (pp) Q8CHT0" source="12305" target="12502" cy:directed="1"/>
      <edge id="14119" label="P47738 (pp) P61922" source="12305" target="12324" cy:directed="1"/>
      <edge id="14118" label="Q64133 (pp) Q9DBF1" source="12304" target="12482" cy:directed="1"/>
      <edge id="14117" label="Q64133 (pp) Q9CZS1" source="12304" target="12412" cy:directed="1"/>
      <edge id="14116" label="Q64133 (pp) Q9JLJ2" source="12304" target="12262" cy:directed="1"/>
      <edge id="14115" label="Q64133 (pp) P47738" source="12304" target="12305" cy:directed="1"/>
      <edge id="14114" label="P48771 (pp) P43024" source="12303" target="12472" cy:directed="1"/>
      <edge id="14113" label="P48771 (pp) Q9CQ69" source="12303" target="12234" cy:directed="1"/>
      <edge id="14112" label="P48771 (pp) Q9CQH3" source="12303" target="12240" cy:directed="1"/>
      <edge id="14111" label="P48771 (pp) Q9D6J6" source="12303" target="12207" cy:directed="1"/>
      <edge id="14110" label="P48771 (pp) Q06185" source="12303" target="12271" cy:directed="1"/>
      <edge id="14109" label="P48771 (pp) Q99LX0" source="12303" target="12317" cy:directed="1"/>
      <edge id="14108" label="P48771 (pp) P56391" source="12303" target="12331" cy:directed="1"/>
      <edge id="14107" label="P48771 (pp) Q91VR2" source="12303" target="12263" cy:directed="1"/>
      <edge id="14106" label="P48771 (pp) Q9DC69" source="12303" target="12407" cy:directed="1"/>
      <edge id="14105" label="O70325 (pp) P99029" source="12302" target="12356" cy:directed="1"/>
      <edge id="14104" label="O70325 (pp) Q9ERS2" source="12302" target="12339" cy:directed="1"/>
      <edge id="14103" label="O70325 (pp) Q9D3D9" source="12302" target="12210" cy:directed="1"/>
      <edge id="14102" label="O70325 (pp) Q99LX0" source="12302" target="12317" cy:directed="1"/>
      <edge id="14101" label="P62812 (pp) P22723" source="12301" target="12656" cy:directed="1"/>
      <edge id="14100" label="P62812 (pp) P63328" source="12301" target="12615" cy:directed="1"/>
      <edge id="14099" label="P63137 (pp) P62812" source="12300" target="12301" cy:directed="1"/>
      <edge id="14098" label="Q9Z1P6 (pp) O09111" source="12299" target="12211" cy:directed="1"/>
      <edge id="14097" label="Q9Z1P6 (pp) Q9DCX2" source="12299" target="12366" cy:directed="1"/>
      <edge id="14096" label="Q9Z1P6 (pp) Q91YT0" source="12299" target="12379" cy:directed="1"/>
      <edge id="14095" label="Q9Z1P6 (pp) Q9DCS9" source="12299" target="12266" cy:directed="1"/>
      <edge id="14094" label="Q9Z1P6 (pp) O08756" source="12299" target="12383" cy:directed="1"/>
      <edge id="14093" label="Q9Z1P6 (pp) Q06185" source="12299" target="12271" cy:directed="1"/>
      <edge id="14092" label="Q9Z1P6 (pp) Q8K3J1" source="12299" target="12404" cy:directed="1"/>
      <edge id="14091" label="Q9Z1P6 (pp) Q9DCJ5" source="12299" target="12380" cy:directed="1"/>
      <edge id="14090" label="Q9Z1P6 (pp) Q9CQH3" source="12299" target="12240" cy:directed="1"/>
      <edge id="14089" label="Q9Z1P6 (pp) Q9CQ69" source="12299" target="12234" cy:directed="1"/>
      <edge id="14088" label="Q9Z1P6 (pp) Q99LX0" source="12299" target="12317" cy:directed="1"/>
      <edge id="14087" label="Q9Z1P6 (pp) Q9CPQ8" source="12299" target="12264" cy:directed="1"/>
      <edge id="14086" label="Q9Z1P6 (pp) Q9DC69" source="12299" target="12407" cy:directed="1"/>
      <edge id="14085" label="Q9Z1P6 (pp) Q9D3D9" source="12299" target="12210" cy:directed="1"/>
      <edge id="14084" label="Q9Z1P6 (pp) Q3UIU2" source="12299" target="12288" cy:directed="1"/>
      <edge id="14083" label="Q9Z1P6 (pp) P56391" source="12299" target="12331" cy:directed="1"/>
      <edge id="14082" label="Q9Z1P6 (pp) Q9ERS2" source="12299" target="12339" cy:directed="1"/>
      <edge id="14081" label="Q9Z1P6 (pp) Q9D6J6" source="12299" target="12207" cy:directed="1"/>
      <edge id="14080" label="P09411 (pp) P06151" source="12298" target="12238" cy:directed="1"/>
      <edge id="14079" label="P09411 (pp) P16858" source="12298" target="12559" cy:directed="1"/>
      <edge id="14078" label="P09411 (pp) P17742" source="12298" target="12259" cy:directed="1"/>
      <edge id="14077" label="P09411 (pp) P17182" source="12298" target="12515" cy:directed="1"/>
      <edge id="14076" label="P09411 (pp) Q9DCD0" source="12298" target="12222" cy:directed="1"/>
      <edge id="14075" label="P17751 (pp) Q91YT0" source="12297" target="12379" cy:directed="1"/>
      <edge id="14074" label="P17751 (pp) Q9R0P5" source="12297" target="12816" cy:directed="1"/>
      <edge id="14073" label="P17751 (pp) P06151" source="12297" target="12238" cy:directed="1"/>
      <edge id="14072" label="P17751 (pp) P52480" source="12297" target="12455" cy:directed="1"/>
      <edge id="14071" label="P17751 (pp) P63101" source="12297" target="12479" cy:directed="1"/>
      <edge id="14070" label="P17751 (pp) Q91VR2" source="12297" target="12263" cy:directed="1"/>
      <edge id="14069" label="P17751 (pp) Q9WUA3" source="12297" target="12510" cy:directed="1"/>
      <edge id="14068" label="P17751 (pp) Q9CR68" source="12297" target="12267" cy:directed="1"/>
      <edge id="14067" label="P17751 (pp) P05064" source="12297" target="12321" cy:directed="1"/>
      <edge id="14066" label="P17751 (pp) Q03265" source="12297" target="12212" cy:directed="1"/>
      <edge id="14065" label="P17751 (pp) P97807" source="12297" target="12340" cy:directed="1"/>
      <edge id="14064" label="P17751 (pp) Q8K3J1" source="12297" target="12404" cy:directed="1"/>
      <edge id="14063" label="P17751 (pp) P99029" source="12297" target="12356" cy:directed="1"/>
      <edge id="14062" label="P17751 (pp) P23506" source="12297" target="12486" cy:directed="1"/>
      <edge id="14061" label="P17751 (pp) Q9WUM5" source="12297" target="12276" cy:directed="1"/>
      <edge id="14060" label="P17751 (pp) P16858" source="12297" target="12559" cy:directed="1"/>
      <edge id="14059" label="P17751 (pp) P47857" source="12297" target="12531" cy:directed="1"/>
      <edge id="14058" label="P17751 (pp) Q64521" source="12297" target="12425" cy:directed="1"/>
      <edge id="14057" label="P17751 (pp) Q9D2G2" source="12297" target="12287" cy:directed="1"/>
      <edge id="14056" label="P17751 (pp) P70296" source="12297" target="12667" cy:directed="1"/>
      <edge id="14055" label="P17751 (pp) Q91VD9" source="12297" target="12265" cy:directed="1"/>
      <edge id="14054" label="P17751 (pp) P56480" source="12297" target="12258" cy:directed="1"/>
      <edge id="14053" label="P17751 (pp) Q9D6J6" source="12297" target="12207" cy:directed="1"/>
      <edge id="14052" label="P17751 (pp) Q9CZ13" source="12297" target="12249" cy:directed="1"/>
      <edge id="14051" label="P17751 (pp) Q93092" source="12297" target="12454" cy:directed="1"/>
      <edge id="14050" label="P17751 (pp) P09411" source="12297" target="12298" cy:directed="1"/>
      <edge id="14049" label="P17751 (pp) Q99LX0" source="12297" target="12317" cy:directed="1"/>
      <edge id="14048" label="P17751 (pp) P17182" source="12297" target="12515" cy:directed="1"/>
      <edge id="14047" label="P17751 (pp) P05063" source="12297" target="12512" cy:directed="1"/>
      <edge id="14046" label="P17751 (pp) P06745" source="12297" target="12464" cy:directed="1"/>
      <edge id="14045" label="Q7TQI3 (pp) P68510" source="12296" target="12213" cy:directed="1"/>
      <edge id="14044" label="O88441 (pp) Q6PB66" source="12295" target="12498" cy:directed="1"/>
      <edge id="14043" label="O88441 (pp) Q9CQH3" source="12295" target="12240" cy:directed="1"/>
      <edge id="14042" label="O88441 (pp) Q9D6J6" source="12295" target="12207" cy:directed="1"/>
      <edge id="14041" label="P70404 (pp) Q9D2G2" source="12294" target="12287" cy:directed="1"/>
      <edge id="14040" label="P70404 (pp) Q60597" source="12294" target="12511" cy:directed="1"/>
      <edge id="14039" label="P70404 (pp) Q9DC69" source="12294" target="12407" cy:directed="1"/>
      <edge id="14038" label="P70404 (pp) Q9WUM5" source="12294" target="12276" cy:directed="1"/>
      <edge id="14037" label="P70404 (pp) Q91VR2" source="12294" target="12263" cy:directed="1"/>
      <edge id="14036" label="P50516 (pp) P08553" source="12293" target="12717" cy:directed="1"/>
      <edge id="14035" label="P50516 (pp) P12382" source="12293" target="12214" cy:directed="1"/>
      <edge id="14034" label="P50516 (pp) Q91VR2" source="12293" target="12263" cy:directed="1"/>
      <edge id="14033" label="P50516 (pp) Q3UHL1" source="12293" target="12605" cy:directed="1"/>
      <edge id="14032" label="P50516 (pp) Q9Z1J3" source="12293" target="12543" cy:directed="1"/>
      <edge id="14031" label="P50516 (pp) Q9Z0E0" source="12293" target="12801" cy:directed="1"/>
      <edge id="14030" label="P50516 (pp) P17426" source="12293" target="12291" cy:directed="1"/>
      <edge id="14029" label="P50516 (pp) O54983" source="12293" target="12713" cy:directed="1"/>
      <edge id="14028" label="P50516 (pp) Q80XN0" source="12293" target="12774" cy:directed="1"/>
      <edge id="14027" label="P50516 (pp) Q99LX0" source="12293" target="12317" cy:directed="1"/>
      <edge id="14026" label="P50516 (pp) P17427" source="12293" target="12290" cy:directed="1"/>
      <edge id="14025" label="P50516 (pp) Q8VD37" source="12293" target="12558" cy:directed="1"/>
      <edge id="14024" label="P50516 (pp) Q9JLM8" source="12293" target="12428" cy:directed="1"/>
      <edge id="14023" label="P50516 (pp) O08539" source="12293" target="12596" cy:directed="1"/>
      <edge id="14022" label="P50516 (pp) P63082" source="12293" target="12448" cy:directed="1"/>
      <edge id="14021" label="P50516 (pp) Q62425" source="12293" target="12545" cy:directed="1"/>
      <edge id="14020" label="P50516 (pp) Q9Z2I0" source="12293" target="12710" cy:directed="1"/>
      <edge id="14019" label="P50516 (pp) O35643" source="12293" target="12679" cy:directed="1"/>
      <edge id="14018" label="P50516 (pp) Q5DQR4" source="12293" target="12671" cy:directed="1"/>
      <edge id="14017" label="P50516 (pp) Q5SQX6" source="12293" target="12603" cy:directed="1"/>
      <edge id="14016" label="P50516 (pp) P47754" source="12293" target="12437" cy:directed="1"/>
      <edge id="14015" label="P50516 (pp) Q9D6R2" source="12293" target="12236" cy:directed="1"/>
      <edge id="14014" label="P50516 (pp) P28660" source="12293" target="12382" cy:directed="1"/>
      <edge id="14013" label="P50516 (pp) P01831" source="12293" target="12619" cy:directed="1"/>
      <edge id="14012" label="P50516 (pp) Q9QYR6" source="12293" target="12608" cy:directed="1"/>
      <edge id="14011" label="P50516 (pp) P46660" source="12293" target="12401" cy:directed="1"/>
      <edge id="14010" label="P50516 (pp) P46460" source="12293" target="12283" cy:directed="1"/>
      <edge id="14009" label="P50516 (pp) Q9D6J6" source="12293" target="12207" cy:directed="1"/>
      <edge id="14008" label="P50516 (pp) P55088" source="12293" target="12535" cy:directed="1"/>
      <edge id="14007" label="P50516 (pp) P53395" source="12293" target="12452" cy:directed="1"/>
      <edge id="14006" label="P50516 (pp) Q7TQF7" source="12293" target="12505" cy:directed="1"/>
      <edge id="14005" label="P50516 (pp) P39053" source="12293" target="12497" cy:directed="1"/>
      <edge id="14004" label="P50516 (pp) Q7TPR4" source="12293" target="12466" cy:directed="1"/>
      <edge id="14003" label="P50516 (pp) P60710" source="12293" target="12342" cy:directed="1"/>
      <edge id="14002" label="P50516 (pp) Q8BPN8" source="12293" target="12447" cy:directed="1"/>
      <edge id="14001" label="P50516 (pp) Q9R0K7" source="12293" target="12423" cy:directed="1"/>
      <edge id="14000" label="P50516 (pp) Q9JHU4" source="12293" target="12402" cy:directed="1"/>
      <edge id="13999" label="P57746 (pp) Q9CQH3" source="12292" target="12240" cy:directed="1"/>
      <edge id="13998" label="P57746 (pp) P63082" source="12292" target="12448" cy:directed="1"/>
      <edge id="13997" label="P57746 (pp) P23506" source="12292" target="12486" cy:directed="1"/>
      <edge id="13996" label="P57746 (pp) Q9WTT4" source="12292" target="12489" cy:directed="1"/>
      <edge id="13995" label="P57746 (pp) Q9Z1G3" source="12292" target="12224" cy:directed="1"/>
      <edge id="13994" label="P57746 (pp) P97450" source="12292" target="12430" cy:directed="1"/>
      <edge id="13993" label="P57746 (pp) Q9CQZ6" source="12292" target="12231" cy:directed="1"/>
      <edge id="13992" label="P57746 (pp) Q9Z1G4" source="12292" target="12275" cy:directed="1"/>
      <edge id="13991" label="P57746 (pp) Q8BVE3" source="12292" target="12370" cy:directed="1"/>
      <edge id="13990" label="P57746 (pp) P50516" source="12292" target="12293" cy:directed="1"/>
      <edge id="13989" label="P17426 (pp) Q8CHC4" source="12291" target="12639" cy:directed="1"/>
      <edge id="13988" label="P17426 (pp) Q80VP1" source="12291" target="12632" cy:directed="1"/>
      <edge id="13987" label="P17426 (pp) O08585" source="12291" target="12607" cy:directed="1"/>
      <edge id="13986" label="P17426 (pp) P62743" source="12291" target="12657" cy:directed="1"/>
      <edge id="13985" label="P17427 (pp) Q9DBG3" source="12290" target="12536" cy:directed="1"/>
      <edge id="13984" label="P17427 (pp) P84091" source="12290" target="12569" cy:directed="1"/>
      <edge id="13983" label="P17427 (pp) Q6IRU5" source="12290" target="12537" cy:directed="1"/>
      <edge id="13982" label="P17427 (pp) Q8CHC4" source="12290" target="12639" cy:directed="1"/>
      <edge id="13981" label="P17427 (pp) P39053" source="12290" target="12497" cy:directed="1"/>
      <edge id="13980" label="P17427 (pp) P62743" source="12290" target="12657" cy:directed="1"/>
      <edge id="13979" label="P17427 (pp) Q80VP1" source="12290" target="12632" cy:directed="1"/>
      <edge id="13978" label="P17427 (pp) O08585" source="12290" target="12607" cy:directed="1"/>
      <edge id="13977" label="P17427 (pp) Q68FD5" source="12290" target="12376" cy:directed="1"/>
      <edge id="13976" label="P17427 (pp) P17426" source="12290" target="12291" cy:directed="1"/>
      <edge id="13975" label="P31938 (pp) P16054" source="12289" target="12443" cy:directed="1"/>
      <edge id="13974" label="P31938 (pp) P35438" source="12289" target="12215" cy:directed="1"/>
      <edge id="13973" label="P31938 (pp) P63085" source="12289" target="12255" cy:directed="1"/>
      <edge id="13972" label="Q3UIU2 (pp) Q9CQH3" source="12288" target="12240" cy:directed="1"/>
      <edge id="13971" label="Q3UIU2 (pp) Q9D6J6" source="12288" target="12207" cy:directed="1"/>
      <edge id="13970" label="Q9D2G2 (pp) Q9D3D9" source="12287" target="12210" cy:directed="1"/>
      <edge id="13969" label="Q9D2G2 (pp) Q60597" source="12287" target="12511" cy:directed="1"/>
      <edge id="13968" label="Q9D2G2 (pp) Q9WUM5" source="12287" target="12276" cy:directed="1"/>
      <edge id="13967" label="Q9D2G2 (pp) Q91VR2" source="12287" target="12263" cy:directed="1"/>
      <edge id="13966" label="Q9CQ62 (pp) P41216" source="12285" target="12628" cy:directed="1"/>
      <edge id="13965" label="Q9CQ62 (pp) P19096" source="12285" target="12686" cy:directed="1"/>
      <edge id="13964" label="Q9CQ62 (pp) Q99LC5" source="12285" target="12315" cy:directed="1"/>
      <edge id="13963" label="Q9CQ62 (pp) Q8BWT1" source="12285" target="12311" cy:directed="1"/>
      <edge id="13962" label="Q9CQ62 (pp) Q99JY0" source="12285" target="12384" cy:directed="1"/>
      <edge id="13961" label="Q08331 (pp) Q01097" source="12284" target="12204" cy:directed="1"/>
      <edge id="13960" label="Q08331 (pp) Q9CQ62" source="12284" target="12285" cy:directed="1"/>
      <edge id="13959" label="P46460 (pp) P63101" source="12283" target="12479" cy:directed="1"/>
      <edge id="13958" label="P46460 (pp) P23819" source="12283" target="12219" cy:directed="1"/>
      <edge id="13957" label="P46460 (pp) P35438" source="12283" target="12215" cy:directed="1"/>
      <edge id="13956" label="P46460 (pp) O35526" source="12283" target="12329" cy:directed="1"/>
      <edge id="13955" label="P46460 (pp) O08599" source="12283" target="12674" cy:directed="1"/>
      <edge id="13954" label="P46460 (pp) Q62442" source="12283" target="12333" cy:directed="1"/>
      <edge id="13953" label="P46460 (pp) Q9CWZ7" source="12283" target="12693" cy:directed="1"/>
      <edge id="13952" label="P46460 (pp) Q01097" source="12283" target="12204" cy:directed="1"/>
      <edge id="13951" label="Q9CPP6 (pp) Q91YT0" source="12281" target="12379" cy:directed="1"/>
      <edge id="13950" label="Q9CPP6 (pp) P43024" source="12281" target="12472" cy:directed="1"/>
      <edge id="13949" label="Q9CPP6 (pp) P56391" source="12281" target="12331" cy:directed="1"/>
      <edge id="13948" label="Q9CPP6 (pp) Q9Z1P6" source="12281" target="12299" cy:directed="1"/>
      <edge id="13947" label="Q9CPP6 (pp) Q9WUM5" source="12281" target="12276" cy:directed="1"/>
      <edge id="13946" label="Q9CPP6 (pp) Q9CQH3" source="12281" target="12240" cy:directed="1"/>
      <edge id="13945" label="Q9CPP6 (pp) Q9D6J5" source="12281" target="12487" cy:directed="1"/>
      <edge id="13944" label="Q9CPP6 (pp) Q99LC5" source="12281" target="12315" cy:directed="1"/>
      <edge id="13943" label="Q9CPP6 (pp) Q9CQ69" source="12281" target="12234" cy:directed="1"/>
      <edge id="13942" label="Q9CPP6 (pp) Q8K3J1" source="12281" target="12404" cy:directed="1"/>
      <edge id="13941" label="Q9CPP6 (pp) Q91VD9" source="12281" target="12265" cy:directed="1"/>
      <edge id="13940" label="Q9CPP6 (pp) Q9CQZ6" source="12281" target="12231" cy:directed="1"/>
      <edge id="13939" label="Q9CPP6 (pp) Q9ERS2" source="12281" target="12339" cy:directed="1"/>
      <edge id="13938" label="Q9CPP6 (pp) Q99LY9" source="12281" target="12252" cy:directed="1"/>
      <edge id="13937" label="Q9CPP6 (pp) Q9DCJ5" source="12281" target="12380" cy:directed="1"/>
      <edge id="13936" label="Q9CPP6 (pp) P48771" source="12281" target="12303" cy:directed="1"/>
      <edge id="13935" label="Q9CPP6 (pp) Q9DCX2" source="12281" target="12366" cy:directed="1"/>
      <edge id="13934" label="Q9CPP6 (pp) Q9DB77" source="12281" target="12405" cy:directed="1"/>
      <edge id="13933" label="Q9CPP6 (pp) Q9D6J6" source="12281" target="12207" cy:directed="1"/>
      <edge id="13932" label="Q9DCW4 (pp) P50544" source="12280" target="12459" cy:directed="1"/>
      <edge id="13931" label="Q9DCW4 (pp) Q8R4N0" source="12280" target="12351" cy:directed="1"/>
      <edge id="13930" label="Q9DCW4 (pp) Q9DC70" source="12280" target="12272" cy:directed="1"/>
      <edge id="13929" label="Q9DCW4 (pp) Q8QZT1" source="12280" target="12557" cy:directed="1"/>
      <edge id="13928" label="Q9DCW4 (pp) Q9D0S9" source="12280" target="12273" cy:directed="1"/>
      <edge id="13927" label="Q9DCW4 (pp) Q9D6J6" source="12280" target="12207" cy:directed="1"/>
      <edge id="13926" label="Q9DCW4 (pp) Q9Z1P6" source="12280" target="12299" cy:directed="1"/>
      <edge id="13925" label="Q9DCW4 (pp) Q61425" source="12280" target="12314" cy:directed="1"/>
      <edge id="13924" label="Q9DCW4 (pp) Q9DCS9" source="12280" target="12266" cy:directed="1"/>
      <edge id="13923" label="Q9DCW4 (pp) Q8BWT1" source="12280" target="12311" cy:directed="1"/>
      <edge id="13922" label="Q9DCW4 (pp) O08756" source="12280" target="12383" cy:directed="1"/>
      <edge id="13921" label="Q9DCW4 (pp) Q9JHI5" source="12280" target="12453" cy:directed="1"/>
      <edge id="13920" label="Q9DCW4 (pp) Q9DCT2" source="12280" target="12233" cy:directed="1"/>
      <edge id="13919" label="Q9DCW4 (pp) Q8BH95" source="12280" target="12248" cy:directed="1"/>
      <edge id="13918" label="Q9DCW4 (pp) Q9CQJ8" source="12280" target="12270" cy:directed="1"/>
      <edge id="13917" label="Q9DCW4 (pp) P52503" source="12280" target="12352" cy:directed="1"/>
      <edge id="13916" label="Q9DCW4 (pp) Q99LC5" source="12280" target="12315" cy:directed="1"/>
      <edge id="13915" label="Q9DCW4 (pp) Q9DC69" source="12280" target="12407" cy:directed="1"/>
      <edge id="13914" label="Q9DCW4 (pp) P19783" source="12280" target="12245" cy:directed="1"/>
      <edge id="13913" label="Q9DCW4 (pp) Q80U28" source="12280" target="12659" cy:directed="1"/>
      <edge id="13912" label="Q9DCW4 (pp) Q99LC3" source="12280" target="12251" cy:directed="1"/>
      <edge id="13911" label="Q9DCW4 (pp) Q921G7" source="12280" target="12310" cy:directed="1"/>
      <edge id="13910" label="Q9DCW4 (pp) Q9DBL1" source="12280" target="12451" cy:directed="1"/>
      <edge id="13909" label="Q9DCW4 (pp) P42125" source="12280" target="12519" cy:directed="1"/>
      <edge id="13908" label="Q9DCW4 (pp) Q9WUM5" source="12280" target="12276" cy:directed="1"/>
      <edge id="13907" label="Q9DCW4 (pp) Q91Z53" source="12280" target="12335" cy:directed="1"/>
      <edge id="13906" label="Q9DCW4 (pp) P17751" source="12280" target="12297" cy:directed="1"/>
      <edge id="13905" label="Q9DCW4 (pp) P08249" source="12280" target="12235" cy:directed="1"/>
      <edge id="13904" label="Q9DCW4 (pp) Q8K3J1" source="12280" target="12404" cy:directed="1"/>
      <edge id="13903" label="Q9DCW4 (pp) Q8BMS1" source="12280" target="12516" cy:directed="1"/>
      <edge id="13902" label="Q9DCW4 (pp) Q9ERS2" source="12280" target="12339" cy:directed="1"/>
      <edge id="13901" label="Q9DCW4 (pp) Q91YT0" source="12280" target="12379" cy:directed="1"/>
      <edge id="13900" label="Q9DCW4 (pp) Q9D6J5" source="12280" target="12487" cy:directed="1"/>
      <edge id="13899" label="Q9DCW4 (pp) O09111" source="12280" target="12211" cy:directed="1"/>
      <edge id="13898" label="Q9DCW4 (pp) Q06185" source="12280" target="12271" cy:directed="1"/>
      <edge id="13897" label="Q9DCW4 (pp) Q9Z2I9" source="12280" target="12458" cy:directed="1"/>
      <edge id="13896" label="Q9DCW4 (pp) Q9CQA3" source="12280" target="12312" cy:directed="1"/>
      <edge id="13895" label="Q9DCW4 (pp) Q8JZN5" source="12280" target="12394" cy:directed="1"/>
      <edge id="13894" label="Q9DCW4 (pp) Q9D3D9" source="12280" target="12210" cy:directed="1"/>
      <edge id="13893" label="Q9DCW4 (pp) Q9DB20" source="12280" target="12239" cy:directed="1"/>
      <edge id="13892" label="Q9DCW4 (pp) P51174" source="12280" target="12392" cy:directed="1"/>
      <edge id="13891" label="Q9DCW4 (pp) P56391" source="12280" target="12331" cy:directed="1"/>
      <edge id="13890" label="Q9DCW4 (pp) Q9DCJ5" source="12280" target="12380" cy:directed="1"/>
      <edge id="13889" label="Q9DCW4 (pp) Q9CPP6" source="12280" target="12281" cy:directed="1"/>
      <edge id="13888" label="P63037 (pp) Q61699" source="12279" target="12718" cy:directed="1"/>
      <edge id="13887" label="P63037 (pp) Q91VR2" source="12279" target="12263" cy:directed="1"/>
      <edge id="13886" label="Q9CQN1 (pp) P63038" source="12278" target="12247" cy:directed="1"/>
      <edge id="13885" label="Q9CQN1 (pp) Q91YT0" source="12278" target="12379" cy:directed="1"/>
      <edge id="13884" label="Q9CQN1 (pp) Q8K3J1" source="12278" target="12404" cy:directed="1"/>
      <edge id="13883" label="Q9CQN1 (pp) P63037" source="12278" target="12279" cy:directed="1"/>
      <edge id="13882" label="Q9WUM5 (pp) Q8VEM8" source="12276" target="12349" cy:directed="1"/>
      <edge id="13881" label="Q9WUM5 (pp) Q60931" source="12276" target="12556" cy:directed="1"/>
      <edge id="13880" label="Q9WUM5 (pp) Q9CQH3" source="12276" target="12240" cy:directed="1"/>
      <edge id="13879" label="Q9WUM5 (pp) Q9ERS2" source="12276" target="12339" cy:directed="1"/>
      <edge id="13878" label="Q9WUM5 (pp) Q99LX0" source="12276" target="12317" cy:directed="1"/>
      <edge id="13877" label="Q9WUM5 (pp) Q60597" source="12276" target="12511" cy:directed="1"/>
      <edge id="13876" label="Q9WUM5 (pp) Q99JY0" source="12276" target="12384" cy:directed="1"/>
      <edge id="13875" label="Q9WUM5 (pp) Q91VR2" source="12276" target="12263" cy:directed="1"/>
      <edge id="13874" label="Q9WUM5 (pp) Q9D6J6" source="12276" target="12207" cy:directed="1"/>
      <edge id="13873" label="Q9WUM5 (pp) P06151" source="12276" target="12238" cy:directed="1"/>
      <edge id="13872" label="Q9WUM5 (pp) Q9DCJ5" source="12276" target="12380" cy:directed="1"/>
      <edge id="13871" label="Q9WUM5 (pp) Q9CQQ7" source="12276" target="12409" cy:directed="1"/>
      <edge id="13870" label="Q9WUM5 (pp) Q9DC69" source="12276" target="12407" cy:directed="1"/>
      <edge id="13869" label="Q9WUM5 (pp) Q9D0K2" source="12276" target="12277" cy:directed="1"/>
      <edge id="13868" label="Q9Z1G4 (pp) Q62277" source="12275" target="12354" cy:directed="1"/>
      <edge id="13867" label="Q9Z1G4 (pp) P63082" source="12275" target="12448" cy:directed="1"/>
      <edge id="13866" label="Q9Z1G4 (pp) Q9WTT4" source="12275" target="12489" cy:directed="1"/>
      <edge id="13865" label="Q9Z1G4 (pp) P50516" source="12275" target="12293" cy:directed="1"/>
      <edge id="13864" label="Q9D1K2 (pp) P50518" source="12274" target="12369" cy:directed="1"/>
      <edge id="13863" label="Q9D1K2 (pp) P57746" source="12274" target="12292" cy:directed="1"/>
      <edge id="13862" label="Q9D1K2 (pp) Q8BVE3" source="12274" target="12370" cy:directed="1"/>
      <edge id="13861" label="Q9D1K2 (pp) Q9Z1P6" source="12274" target="12299" cy:directed="1"/>
      <edge id="13860" label="Q9D1K2 (pp) Q91VM9" source="12274" target="12406" cy:directed="1"/>
      <edge id="13859" label="Q9D1K2 (pp) P50516" source="12274" target="12293" cy:directed="1"/>
      <edge id="13858" label="Q9D1K2 (pp) Q9CQ75" source="12274" target="12389" cy:directed="1"/>
      <edge id="13857" label="Q9D1K2 (pp) P51863" source="12274" target="12223" cy:directed="1"/>
      <edge id="13856" label="Q9D1K2 (pp) Q9CQZ5" source="12274" target="12206" cy:directed="1"/>
      <edge id="13855" label="Q9D1K2 (pp) Q9WTT4" source="12274" target="12489" cy:directed="1"/>
      <edge id="13854" label="Q9D1K2 (pp) Q9Z1G3" source="12274" target="12224" cy:directed="1"/>
      <edge id="13853" label="Q9D1K2 (pp) Q8K3J1" source="12274" target="12404" cy:directed="1"/>
      <edge id="13852" label="Q9D1K2 (pp) P63082" source="12274" target="12448" cy:directed="1"/>
      <edge id="13851" label="Q9D1K2 (pp) P62814" source="12274" target="12326" cy:directed="1"/>
      <edge id="13850" label="Q9D1K2 (pp) Q9Z1G4" source="12274" target="12275" cy:directed="1"/>
      <edge id="13849" label="Q9D0S9 (pp) O08756" source="12273" target="12383" cy:directed="1"/>
      <edge id="13848" label="Q9D0S9 (pp) Q91Z53" source="12273" target="12335" cy:directed="1"/>
      <edge id="13847" label="Q9DC70 (pp) Q9DC69" source="12272" target="12407" cy:directed="1"/>
      <edge id="13846" label="Q9DC70 (pp) Q9CXZ1" source="12272" target="12396" cy:directed="1"/>
      <edge id="13845" label="Q9DC70 (pp) Q06185" source="12272" target="12271" cy:directed="1"/>
      <edge id="13844" label="Q9DC70 (pp) Q9D6J6" source="12272" target="12207" cy:directed="1"/>
      <edge id="13843" label="Q9DC70 (pp) Q9CZ13" source="12272" target="12249" cy:directed="1"/>
      <edge id="13842" label="Q9DC70 (pp) Q91VT4" source="12272" target="12754" cy:directed="1"/>
      <edge id="13841" label="Q9DC70 (pp) Q91VD9" source="12272" target="12265" cy:directed="1"/>
      <edge id="13840" label="Q9DC70 (pp) P19783" source="12272" target="12245" cy:directed="1"/>
      <edge id="13839" label="Q9DC70 (pp) Q91Z53" source="12272" target="12335" cy:directed="1"/>
      <edge id="13838" label="Q9DC70 (pp) Q91VR2" source="12272" target="12263" cy:directed="1"/>
      <edge id="13837" label="Q9DC70 (pp) Q9DCS9" source="12272" target="12266" cy:directed="1"/>
      <edge id="13836" label="Q9DC70 (pp) Q9D3D9" source="12272" target="12210" cy:directed="1"/>
      <edge id="13835" label="Q9DC70 (pp) O08756" source="12272" target="12383" cy:directed="1"/>
      <edge id="13834" label="Q9DC70 (pp) O09111" source="12272" target="12211" cy:directed="1"/>
      <edge id="13833" label="Q9DC70 (pp) Q9CQ69" source="12272" target="12234" cy:directed="1"/>
      <edge id="13832" label="Q9DC70 (pp) Q8K3J1" source="12272" target="12404" cy:directed="1"/>
      <edge id="13831" label="Q9DC70 (pp) Q9CQJ8" source="12272" target="12270" cy:directed="1"/>
      <edge id="13830" label="Q9DC70 (pp) Q9ERS2" source="12272" target="12339" cy:directed="1"/>
      <edge id="13829" label="Q9DC70 (pp) P70404" source="12272" target="12294" cy:directed="1"/>
      <edge id="13828" label="Q9DC70 (pp) P56480" source="12272" target="12258" cy:directed="1"/>
      <edge id="13827" label="Q9DC70 (pp) Q9CPP6" source="12272" target="12281" cy:directed="1"/>
      <edge id="13826" label="Q9DC70 (pp) Q91YT0" source="12272" target="12379" cy:directed="1"/>
      <edge id="13825" label="Q9DC70 (pp) Q9CR68" source="12272" target="12267" cy:directed="1"/>
      <edge id="13824" label="Q9DC70 (pp) Q3UIU2" source="12272" target="12288" cy:directed="1"/>
      <edge id="13823" label="Q9DC70 (pp) Q9DB20" source="12272" target="12239" cy:directed="1"/>
      <edge id="13822" label="Q9DC70 (pp) Q9D855" source="12272" target="12403" cy:directed="1"/>
      <edge id="13821" label="Q9DC70 (pp) Q9DCX2" source="12272" target="12366" cy:directed="1"/>
      <edge id="13820" label="Q9DC70 (pp) Q9DCJ5" source="12272" target="12380" cy:directed="1"/>
      <edge id="13819" label="Q9DC70 (pp) Q9D0M3" source="12272" target="12250" cy:directed="1"/>
      <edge id="13818" label="Q9DC70 (pp) P17751" source="12272" target="12297" cy:directed="1"/>
      <edge id="13817" label="Q9DC70 (pp) Q99KI0" source="12272" target="12338" cy:directed="1"/>
      <edge id="13816" label="Q9DC70 (pp) Q99LC3" source="12272" target="12251" cy:directed="1"/>
      <edge id="13815" label="Q9DC70 (pp) P97450" source="12272" target="12430" cy:directed="1"/>
      <edge id="13814" label="Q9DC70 (pp) P52503" source="12272" target="12352" cy:directed="1"/>
      <edge id="13813" label="Q9DC70 (pp) P56391" source="12272" target="12331" cy:directed="1"/>
      <edge id="13812" label="Q9DC70 (pp) Q9CQH3" source="12272" target="12240" cy:directed="1"/>
      <edge id="13811" label="Q9DC70 (pp) P42125" source="12272" target="12519" cy:directed="1"/>
      <edge id="13810" label="Q9DC70 (pp) Q9Z1P6" source="12272" target="12299" cy:directed="1"/>
      <edge id="13809" label="Q9DC70 (pp) P62073" source="12272" target="12355" cy:directed="1"/>
      <edge id="13808" label="Q9DC70 (pp) Q8K2B3" source="12272" target="12347" cy:directed="1"/>
      <edge id="13807" label="Q9DC70 (pp) Q9CQZ5" source="12272" target="12206" cy:directed="1"/>
      <edge id="13806" label="Q9DC70 (pp) Q03265" source="12272" target="12212" cy:directed="1"/>
      <edge id="13805" label="Q9DC70 (pp) Q9D0S9" source="12272" target="12273" cy:directed="1"/>
      <edge id="13804" label="Q06185 (pp) P03930" source="12271" target="12388" cy:directed="1"/>
      <edge id="13803" label="Q06185 (pp) Q9DCX2" source="12271" target="12366" cy:directed="1"/>
      <edge id="13802" label="Q06185 (pp) Q9CQQ7" source="12271" target="12409" cy:directed="1"/>
      <edge id="13801" label="Q06185 (pp) Q9ERS2" source="12271" target="12339" cy:directed="1"/>
      <edge id="13800" label="Q06185 (pp) Q9D3D9" source="12271" target="12210" cy:directed="1"/>
      <edge id="13799" label="Q06185 (pp) Q91VR2" source="12271" target="12263" cy:directed="1"/>
      <edge id="13798" label="Q06185 (pp) Q8K3J1" source="12271" target="12404" cy:directed="1"/>
      <edge id="13797" label="Q06185 (pp) O09111" source="12271" target="12211" cy:directed="1"/>
      <edge id="13796" label="Q06185 (pp) Q9CQ69" source="12271" target="12234" cy:directed="1"/>
      <edge id="13795" label="Q06185 (pp) Q9DCJ5" source="12271" target="12380" cy:directed="1"/>
      <edge id="13794" label="Q06185 (pp) P56391" source="12271" target="12331" cy:directed="1"/>
      <edge id="13793" label="Q06185 (pp) Q9CQH3" source="12271" target="12240" cy:directed="1"/>
      <edge id="13792" label="Q06185 (pp) Q9D6J6" source="12271" target="12207" cy:directed="1"/>
      <edge id="13791" label="Q06185 (pp) Q99LY9" source="12271" target="12252" cy:directed="1"/>
      <edge id="13790" label="Q9CQJ8 (pp) Q9CQQ7" source="12270" target="12409" cy:directed="1"/>
      <edge id="13789" label="Q9CQJ8 (pp) Q9DCS9" source="12270" target="12266" cy:directed="1"/>
      <edge id="13788" label="Q9CQJ8 (pp) P62073" source="12270" target="12355" cy:directed="1"/>
      <edge id="13787" label="Q9CQJ8 (pp) P99029" source="12270" target="12356" cy:directed="1"/>
      <edge id="13786" label="Q9CQJ8 (pp) Q9D3D9" source="12270" target="12210" cy:directed="1"/>
      <edge id="13785" label="Q9CQJ8 (pp) Q91VD9" source="12270" target="12265" cy:directed="1"/>
      <edge id="13784" label="Q9CQJ8 (pp) Q9D6J5" source="12270" target="12487" cy:directed="1"/>
      <edge id="13783" label="Q9CQJ8 (pp) Q91VR2" source="12270" target="12263" cy:directed="1"/>
      <edge id="13782" label="Q9CQJ8 (pp) Q9DCX2" source="12270" target="12366" cy:directed="1"/>
      <edge id="13781" label="Q9CQJ8 (pp) Q8K3J1" source="12270" target="12404" cy:directed="1"/>
      <edge id="13780" label="Q9CQJ8 (pp) Q99LY9" source="12270" target="12252" cy:directed="1"/>
      <edge id="13779" label="Q9CQJ8 (pp) Q9CQH3" source="12270" target="12240" cy:directed="1"/>
      <edge id="13778" label="Q9CQJ8 (pp) Q9CR68" source="12270" target="12267" cy:directed="1"/>
      <edge id="13777" label="Q9CQJ8 (pp) Q62425" source="12270" target="12545" cy:directed="1"/>
      <edge id="13776" label="Q9CQJ8 (pp) Q03265" source="12270" target="12212" cy:directed="1"/>
      <edge id="13775" label="Q9CQJ8 (pp) Q8VEM8" source="12270" target="12349" cy:directed="1"/>
      <edge id="13774" label="Q9CQJ8 (pp) Q99LC5" source="12270" target="12315" cy:directed="1"/>
      <edge id="13773" label="Q9CQJ8 (pp) Q9CQZ5" source="12270" target="12206" cy:directed="1"/>
      <edge id="13772" label="Q9CQJ8 (pp) Q8K1Z0" source="12270" target="12319" cy:directed="1"/>
      <edge id="13771" label="Q9CQJ8 (pp) Q9CQC7" source="12270" target="12494" cy:directed="1"/>
      <edge id="13770" label="Q9CQJ8 (pp) P43024" source="12270" target="12472" cy:directed="1"/>
      <edge id="13769" label="Q9CQJ8 (pp) Q9CPQ8" source="12270" target="12264" cy:directed="1"/>
      <edge id="13768" label="Q9CQJ8 (pp) Q9CPP6" source="12270" target="12281" cy:directed="1"/>
      <edge id="13767" label="Q9CQJ8 (pp) Q99LC3" source="12270" target="12251" cy:directed="1"/>
      <edge id="13766" label="Q9CQJ8 (pp) Q91YT0" source="12270" target="12379" cy:directed="1"/>
      <edge id="13765" label="Q9CQJ8 (pp) Q99KI0" source="12270" target="12338" cy:directed="1"/>
      <edge id="13764" label="Q9CQJ8 (pp) Q9ERS2" source="12270" target="12339" cy:directed="1"/>
      <edge id="13763" label="Q9CQJ8 (pp) Q9CQZ6" source="12270" target="12231" cy:directed="1"/>
      <edge id="13762" label="Q9CQJ8 (pp) Q9D023" source="12270" target="12416" cy:directed="1"/>
      <edge id="13761" label="Q9CQJ8 (pp) P97807" source="12270" target="12340" cy:directed="1"/>
      <edge id="13760" label="Q9CQJ8 (pp) Q9CZ13" source="12270" target="12249" cy:directed="1"/>
      <edge id="13759" label="Q9CQJ8 (pp) P97450" source="12270" target="12430" cy:directed="1"/>
      <edge id="13758" label="Q9CQJ8 (pp) Q9CQ54" source="12270" target="12232" cy:directed="1"/>
      <edge id="13757" label="Q9CQJ8 (pp) Q9D6J6" source="12270" target="12207" cy:directed="1"/>
      <edge id="13756" label="Q9CQJ8 (pp) Q9D0M3" source="12270" target="12250" cy:directed="1"/>
      <edge id="13755" label="Q9CQJ8 (pp) P48771" source="12270" target="12303" cy:directed="1"/>
      <edge id="13754" label="Q9CQJ8 (pp) Q9DCJ5" source="12270" target="12380" cy:directed="1"/>
      <edge id="13753" label="Q9CQJ8 (pp) Q9CQ69" source="12270" target="12234" cy:directed="1"/>
      <edge id="13752" label="Q9CQJ8 (pp) Q9DB20" source="12270" target="12239" cy:directed="1"/>
      <edge id="13751" label="Q9CQJ8 (pp) O09111" source="12270" target="12211" cy:directed="1"/>
      <edge id="13750" label="Q9CQJ8 (pp) Q9DC69" source="12270" target="12407" cy:directed="1"/>
      <edge id="13749" label="Q9CQJ8 (pp) Q9Z1P6" source="12270" target="12299" cy:directed="1"/>
      <edge id="13748" label="Q9CQJ8 (pp) Q9DB77" source="12270" target="12405" cy:directed="1"/>
      <edge id="13747" label="Q9CQJ8 (pp) P19783" source="12270" target="12245" cy:directed="1"/>
      <edge id="13746" label="Q9CQJ8 (pp) Q06185" source="12270" target="12271" cy:directed="1"/>
      <edge id="13745" label="P05132 (pp) P35438" source="12269" target="12215" cy:directed="1"/>
      <edge id="13744" label="P05132 (pp) P31324" source="12269" target="12499" cy:directed="1"/>
      <edge id="13743" label="P05132 (pp) P12367" source="12269" target="12417" cy:directed="1"/>
      <edge id="13742" label="Q9CR68 (pp) O35658" source="12267" target="12364" cy:directed="1"/>
      <edge id="13741" label="Q9CR68 (pp) Q9CQH3" source="12267" target="12240" cy:directed="1"/>
      <edge id="13740" label="Q9CR68 (pp) Q91VR2" source="12267" target="12263" cy:directed="1"/>
      <edge id="13739" label="Q9CR68 (pp) Q8VEM8" source="12267" target="12349" cy:directed="1"/>
      <edge id="13738" label="Q9CR68 (pp) Q9DCX2" source="12267" target="12366" cy:directed="1"/>
      <edge id="13737" label="Q9CR68 (pp) O09111" source="12267" target="12211" cy:directed="1"/>
      <edge id="13736" label="Q9CR68 (pp) Q9DC69" source="12267" target="12407" cy:directed="1"/>
      <edge id="13735" label="Q9CR68 (pp) Q9D6J6" source="12267" target="12207" cy:directed="1"/>
      <edge id="13734" label="Q9CR68 (pp) P62897" source="12267" target="12286" cy:directed="1"/>
      <edge id="13733" label="Q9CR68 (pp) O88441" source="12267" target="12295" cy:directed="1"/>
      <edge id="13732" label="Q9CR68 (pp) Q9CQ69" source="12267" target="12234" cy:directed="1"/>
      <edge id="13731" label="Q9CR68 (pp) P56391" source="12267" target="12331" cy:directed="1"/>
      <edge id="13730" label="Q9CR68 (pp) P00405" source="12267" target="12669" cy:directed="1"/>
      <edge id="13729" label="Q9CR68 (pp) Q9D3D9" source="12267" target="12210" cy:directed="1"/>
      <edge id="13728" label="Q9CR68 (pp) Q9ERS2" source="12267" target="12339" cy:directed="1"/>
      <edge id="13727" label="Q9CR68 (pp) Q9WUM5" source="12267" target="12276" cy:directed="1"/>
      <edge id="13726" label="Q9CR68 (pp) Q9DCJ5" source="12267" target="12380" cy:directed="1"/>
      <edge id="13725" label="Q9CR68 (pp) Q8K3J1" source="12267" target="12404" cy:directed="1"/>
      <edge id="13724" label="Q9CR68 (pp) Q9CQQ7" source="12267" target="12409" cy:directed="1"/>
      <edge id="13723" label="Q9CR68 (pp) Q06185" source="12267" target="12271" cy:directed="1"/>
      <edge id="13722" label="Q9CR68 (pp) Q9D2G2" source="12267" target="12287" cy:directed="1"/>
      <edge id="13721" label="Q9CR68 (pp) P43024" source="12267" target="12472" cy:directed="1"/>
      <edge id="13720" label="Q9DCS9 (pp) O09111" source="12266" target="12211" cy:directed="1"/>
      <edge id="13719" label="Q9DCS9 (pp) Q9CQH3" source="12266" target="12240" cy:directed="1"/>
      <edge id="13718" label="Q9DCS9 (pp) Q9DCJ5" source="12266" target="12380" cy:directed="1"/>
      <edge id="13717" label="Q9DCS9 (pp) Q8K3J1" source="12266" target="12404" cy:directed="1"/>
      <edge id="13716" label="Q9DCS9 (pp) Q9CQ69" source="12266" target="12234" cy:directed="1"/>
      <edge id="13715" label="Q9DCS9 (pp) Q9ERS2" source="12266" target="12339" cy:directed="1"/>
      <edge id="13714" label="Q9DCS9 (pp) Q9D6J6" source="12266" target="12207" cy:directed="1"/>
      <edge id="13713" label="Q9DCS9 (pp) Q9DCX2" source="12266" target="12366" cy:directed="1"/>
      <edge id="13712" label="Q9DCS9 (pp) Q9D3D9" source="12266" target="12210" cy:directed="1"/>
      <edge id="13711" label="Q9DCS9 (pp) Q9CPQ8" source="12266" target="12264" cy:directed="1"/>
      <edge id="13710" label="Q9DCS9 (pp) Q06185" source="12266" target="12271" cy:directed="1"/>
      <edge id="13709" label="Q9DCS9 (pp) Q9CQQ7" source="12266" target="12409" cy:directed="1"/>
      <edge id="13708" label="Q9DCS9 (pp) Q9DC69" source="12266" target="12407" cy:directed="1"/>
      <edge id="13707" label="Q9DCS9 (pp) Q9CR68" source="12266" target="12267" cy:directed="1"/>
      <edge id="13706" label="Q91VD9 (pp) Q9D6J6" source="12265" target="12207" cy:directed="1"/>
      <edge id="13705" label="Q91VD9 (pp) Q9CQZ6" source="12265" target="12231" cy:directed="1"/>
      <edge id="13704" label="Q91VD9 (pp) Q9D2G2" source="12265" target="12287" cy:directed="1"/>
      <edge id="13703" label="Q91VD9 (pp) O09111" source="12265" target="12211" cy:directed="1"/>
      <edge id="13702" label="Q91VD9 (pp) Q9CQ69" source="12265" target="12234" cy:directed="1"/>
      <edge id="13701" label="Q91VD9 (pp) Q91VR2" source="12265" target="12263" cy:directed="1"/>
      <edge id="13700" label="Q91VD9 (pp) Q9CQH3" source="12265" target="12240" cy:directed="1"/>
      <edge id="13699" label="Q91VD9 (pp) Q9CR68" source="12265" target="12267" cy:directed="1"/>
      <edge id="13698" label="Q91VD9 (pp) Q9WUM5" source="12265" target="12276" cy:directed="1"/>
      <edge id="13697" label="Q91VD9 (pp) Q9DCS9" source="12265" target="12266" cy:directed="1"/>
      <edge id="13696" label="Q91VD9 (pp) Q6PB66" source="12265" target="12498" cy:directed="1"/>
      <edge id="13695" label="Q91VD9 (pp) Q99LC3" source="12265" target="12251" cy:directed="1"/>
      <edge id="13694" label="Q91VD9 (pp) Q9DB77" source="12265" target="12405" cy:directed="1"/>
      <edge id="13693" label="Q91VD9 (pp) P97807" source="12265" target="12340" cy:directed="1"/>
      <edge id="13692" label="Q91VD9 (pp) Q9CQQ7" source="12265" target="12409" cy:directed="1"/>
      <edge id="13691" label="Q91VD9 (pp) Q9CQ54" source="12265" target="12232" cy:directed="1"/>
      <edge id="13690" label="Q91VD9 (pp) Q9DCJ5" source="12265" target="12380" cy:directed="1"/>
      <edge id="13689" label="Q91VD9 (pp) Q8BMF4" source="12265" target="12253" cy:directed="1"/>
      <edge id="13688" label="Q91VD9 (pp) Q9Z1P6" source="12265" target="12299" cy:directed="1"/>
      <edge id="13687" label="Q91VD9 (pp) Q8K3J1" source="12265" target="12404" cy:directed="1"/>
      <edge id="13686" label="Q91VD9 (pp) Q99LC5" source="12265" target="12315" cy:directed="1"/>
      <edge id="13685" label="Q91VD9 (pp) Q3UIU2" source="12265" target="12288" cy:directed="1"/>
      <edge id="13684" label="Q91VD9 (pp) Q99LY9" source="12265" target="12252" cy:directed="1"/>
      <edge id="13683" label="Q91VD9 (pp) Q91YT0" source="12265" target="12379" cy:directed="1"/>
      <edge id="13682" label="Q91VD9 (pp) Q9DC69" source="12265" target="12407" cy:directed="1"/>
      <edge id="13681" label="Q91VD9 (pp) Q9ERS2" source="12265" target="12339" cy:directed="1"/>
      <edge id="13680" label="Q9CPQ8 (pp) Q9D6J6" source="12264" target="12207" cy:directed="1"/>
      <edge id="13679" label="Q9CPQ8 (pp) Q9CQH3" source="12264" target="12240" cy:directed="1"/>
      <edge id="13678" label="Q91VR2 (pp) Q9D6J6" source="12263" target="12207" cy:directed="1"/>
      <edge id="13677" label="Q91VR2 (pp) Q9CQH3" source="12263" target="12240" cy:directed="1"/>
      <edge id="13676" label="Q91VR2 (pp) O09111" source="12263" target="12211" cy:directed="1"/>
      <edge id="13675" label="Q9JLJ2 (pp) P61922" source="12262" target="12324" cy:directed="1"/>
      <edge id="13674" label="Q9JLJ2 (pp) Q8BW75" source="12262" target="12673" cy:directed="1"/>
      <edge id="13673" label="Q9JLJ2 (pp) Q8CHT0" source="12262" target="12502" cy:directed="1"/>
      <edge id="13672" label="Q9JLJ2 (pp) Q61425" source="12262" target="12314" cy:directed="1"/>
      <edge id="13671" label="Q9JLJ2 (pp) Q9EQ20" source="12262" target="12362" cy:directed="1"/>
      <edge id="13670" label="Q9JLJ2 (pp) Q91VR2" source="12262" target="12263" cy:directed="1"/>
      <edge id="13669" label="P67778 (pp) P50516" source="12261" target="12293" cy:directed="1"/>
      <edge id="13668" label="P68404 (pp) P26645" source="12260" target="12705" cy:directed="1"/>
      <edge id="13667" label="P68404 (pp) P35438" source="12260" target="12215" cy:directed="1"/>
      <edge id="13666" label="P56480 (pp) Q03265" source="12258" target="12212" cy:directed="1"/>
      <edge id="13665" label="P56480 (pp) P97807" source="12258" target="12340" cy:directed="1"/>
      <edge id="13664" label="P56480 (pp) Q9CR68" source="12258" target="12267" cy:directed="1"/>
      <edge id="13663" label="P56480 (pp) Q91YT0" source="12258" target="12379" cy:directed="1"/>
      <edge id="13662" label="P56480 (pp) Q9CQQ7" source="12258" target="12409" cy:directed="1"/>
      <edge id="13661" label="P56480 (pp) Q9D6J6" source="12258" target="12207" cy:directed="1"/>
      <edge id="13660" label="P56480 (pp) Q91VD9" source="12258" target="12265" cy:directed="1"/>
      <edge id="13659" label="P56480 (pp) P16054" source="12258" target="12443" cy:directed="1"/>
      <edge id="13658" label="P56480 (pp) Q91VR2" source="12258" target="12263" cy:directed="1"/>
      <edge id="13657" label="P56480 (pp) Q8VEM8" source="12258" target="12349" cy:directed="1"/>
      <edge id="13656" label="P56480 (pp) Q9DCX2" source="12258" target="12366" cy:directed="1"/>
      <edge id="13655" label="P56480 (pp) P17182" source="12258" target="12515" cy:directed="1"/>
      <edge id="13654" label="P56480 (pp) Q8K3J1" source="12258" target="12404" cy:directed="1"/>
      <edge id="13653" label="P56480 (pp) Q99LC3" source="12258" target="12251" cy:directed="1"/>
      <edge id="13652" label="P56480 (pp) O35143" source="12258" target="12703" cy:directed="1"/>
      <edge id="13651" label="P56480 (pp) P15105" source="12258" target="12282" cy:directed="1"/>
      <edge id="13650" label="P56480 (pp) P56391" source="12258" target="12331" cy:directed="1"/>
      <edge id="13649" label="P56480 (pp) P00405" source="12258" target="12669" cy:directed="1"/>
      <edge id="13648" label="P56480 (pp) P62259" source="12258" target="12225" cy:directed="1"/>
      <edge id="13647" label="P56480 (pp) P19783" source="12258" target="12245" cy:directed="1"/>
      <edge id="13646" label="P56480 (pp) Q9CZ13" source="12258" target="12249" cy:directed="1"/>
      <edge id="13645" label="P56480 (pp) P17156" source="12258" target="12578" cy:directed="1"/>
      <edge id="13644" label="P56480 (pp) Q9WUM5" source="12258" target="12276" cy:directed="1"/>
      <edge id="13643" label="P56480 (pp) Q99LX0" source="12258" target="12317" cy:directed="1"/>
      <edge id="13642" label="P56480 (pp) Q06185" source="12258" target="12271" cy:directed="1"/>
      <edge id="13641" label="P56480 (pp) P03930" source="12258" target="12388" cy:directed="1"/>
      <edge id="13640" label="P56480 (pp) Q60864" source="12258" target="12374" cy:directed="1"/>
      <edge id="13639" label="P56480 (pp) Q9D3D9" source="12258" target="12210" cy:directed="1"/>
      <edge id="13638" label="P56480 (pp) P09103" source="12258" target="12474" cy:directed="1"/>
      <edge id="13637" label="P56480 (pp) P50516" source="12258" target="12293" cy:directed="1"/>
      <edge id="13636" label="P56480 (pp) P63038" source="12258" target="12247" cy:directed="1"/>
      <edge id="13635" label="P56480 (pp) Q9D2G2" source="12258" target="12287" cy:directed="1"/>
      <edge id="13634" label="P56480 (pp) P17742" source="12258" target="12259" cy:directed="1"/>
      <edge id="13633" label="Q61598 (pp) P62821" source="12257" target="12648" cy:directed="1"/>
      <edge id="13632" label="Q61598 (pp) Q99PT1" source="12257" target="12433" cy:directed="1"/>
      <edge id="13631" label="Q61598 (pp) P63011" source="12257" target="12547" cy:directed="1"/>
      <edge id="13630" label="Q61598 (pp) Q91VR2" source="12257" target="12263" cy:directed="1"/>
      <edge id="13629" label="P61027 (pp) Q61598" source="12256" target="12257" cy:directed="1"/>
      <edge id="13628" label="P63085 (pp) P07901" source="12255" target="12508" cy:directed="1"/>
      <edge id="13627" label="P63085 (pp) Q64010" source="12255" target="12429" cy:directed="1"/>
      <edge id="13626" label="P63085 (pp) P35438" source="12255" target="12215" cy:directed="1"/>
      <edge id="13625" label="Q05920 (pp) P15105" source="12254" target="12282" cy:directed="1"/>
      <edge id="13624" label="Q05920 (pp) P06151" source="12254" target="12238" cy:directed="1"/>
      <edge id="13623" label="Q8BMF4 (pp) Q922H2" source="12253" target="12691" cy:directed="1"/>
      <edge id="13622" label="Q8BMF4 (pp) Q99JY0" source="12253" target="12384" cy:directed="1"/>
      <edge id="13621" label="Q8BMF4 (pp) Q9WUM5" source="12253" target="12276" cy:directed="1"/>
      <edge id="13620" label="Q8BMF4 (pp) P63101" source="12253" target="12479" cy:directed="1"/>
      <edge id="13619" label="Q8BMF4 (pp) Q9D2G2" source="12253" target="12287" cy:directed="1"/>
      <edge id="13618" label="Q8BMF4 (pp) Q8BWT1" source="12253" target="12311" cy:directed="1"/>
      <edge id="13617" label="Q8BMF4 (pp) Q05920" source="12253" target="12254" cy:directed="1"/>
      <edge id="13616" label="Q99LY9 (pp) Q9D6J6" source="12252" target="12207" cy:directed="1"/>
      <edge id="13615" label="Q99LY9 (pp) Q9CQH3" source="12252" target="12240" cy:directed="1"/>
      <edge id="13614" label="Q99LY9 (pp) Q9ERS2" source="12252" target="12339" cy:directed="1"/>
      <edge id="13613" label="Q99LC3 (pp) Q8K3J1" source="12251" target="12404" cy:directed="1"/>
      <edge id="13612" label="Q99LC3 (pp) Q9D3D9" source="12251" target="12210" cy:directed="1"/>
      <edge id="13611" label="Q99LC3 (pp) Q9DC69" source="12251" target="12407" cy:directed="1"/>
      <edge id="13610" label="Q99LC3 (pp) Q9CQ69" source="12251" target="12234" cy:directed="1"/>
      <edge id="13609" label="Q99LC3 (pp) Q9DCS9" source="12251" target="12266" cy:directed="1"/>
      <edge id="13608" label="Q99LC3 (pp) Q9CQ54" source="12251" target="12232" cy:directed="1"/>
      <edge id="13607" label="Q99LC3 (pp) Q91YT0" source="12251" target="12379" cy:directed="1"/>
      <edge id="13606" label="Q99LC3 (pp) Q9DB77" source="12251" target="12405" cy:directed="1"/>
      <edge id="13605" label="Q99LC3 (pp) Q9CQH3" source="12251" target="12240" cy:directed="1"/>
      <edge id="13604" label="Q99LC3 (pp) Q9D6J6" source="12251" target="12207" cy:directed="1"/>
      <edge id="13603" label="Q99LC3 (pp) O09111" source="12251" target="12211" cy:directed="1"/>
      <edge id="13602" label="Q99LC3 (pp) P50516" source="12251" target="12293" cy:directed="1"/>
      <edge id="13601" label="Q99LC3 (pp) Q9DCJ5" source="12251" target="12380" cy:directed="1"/>
      <edge id="13600" label="Q99LC3 (pp) Q9Z1P6" source="12251" target="12299" cy:directed="1"/>
      <edge id="13599" label="Q99LC3 (pp) Q99LY9" source="12251" target="12252" cy:directed="1"/>
      <edge id="13598" label="Q9D0M3 (pp) P56480" source="12250" target="12258" cy:directed="1"/>
      <edge id="13597" label="Q9D0M3 (pp) O35658" source="12250" target="12364" cy:directed="1"/>
      <edge id="13596" label="Q9D0M3 (pp) Q03265" source="12250" target="12212" cy:directed="1"/>
      <edge id="13595" label="Q9D0M3 (pp) Q9CPP6" source="12250" target="12281" cy:directed="1"/>
      <edge id="13594" label="Q9D0M3 (pp) P19783" source="12250" target="12245" cy:directed="1"/>
      <edge id="13593" label="Q9D0M3 (pp) P00405" source="12250" target="12669" cy:directed="1"/>
      <edge id="13592" label="Q9D0M3 (pp) Q9Z1P6" source="12250" target="12299" cy:directed="1"/>
      <edge id="13591" label="Q9D0M3 (pp) Q9CQH3" source="12250" target="12240" cy:directed="1"/>
      <edge id="13590" label="Q9D0M3 (pp) Q9CZ13" source="12250" target="12249" cy:directed="1"/>
      <edge id="13589" label="Q9D0M3 (pp) P48771" source="12250" target="12303" cy:directed="1"/>
      <edge id="13588" label="Q9D0M3 (pp) Q9DCJ5" source="12250" target="12380" cy:directed="1"/>
      <edge id="13587" label="Q9D0M3 (pp) Q9D2G2" source="12250" target="12287" cy:directed="1"/>
      <edge id="13586" label="Q9D0M3 (pp) Q9CQQ7" source="12250" target="12409" cy:directed="1"/>
      <edge id="13585" label="Q9D0M3 (pp) Q9DC69" source="12250" target="12407" cy:directed="1"/>
      <edge id="13584" label="Q9D0M3 (pp) P43024" source="12250" target="12472" cy:directed="1"/>
      <edge id="13583" label="Q9D0M3 (pp) Q99LX0" source="12250" target="12317" cy:directed="1"/>
      <edge id="13582" label="Q9D0M3 (pp) Q99LC3" source="12250" target="12251" cy:directed="1"/>
      <edge id="13581" label="Q9D0M3 (pp) P42125" source="12250" target="12519" cy:directed="1"/>
      <edge id="13580" label="Q9D0M3 (pp) Q8VEM8" source="12250" target="12349" cy:directed="1"/>
      <edge id="13579" label="Q9D0M3 (pp) P56391" source="12250" target="12331" cy:directed="1"/>
      <edge id="13578" label="Q9D0M3 (pp) Q64521" source="12250" target="12425" cy:directed="1"/>
      <edge id="13577" label="Q9D0M3 (pp) Q8K3J1" source="12250" target="12404" cy:directed="1"/>
      <edge id="13576" label="Q9D0M3 (pp) P62073" source="12250" target="12355" cy:directed="1"/>
      <edge id="13575" label="Q9D0M3 (pp) Q9D6J6" source="12250" target="12207" cy:directed="1"/>
      <edge id="13574" label="Q9D0M3 (pp) Q91YT0" source="12250" target="12379" cy:directed="1"/>
      <edge id="13573" label="Q9D0M3 (pp) Q9CR68" source="12250" target="12267" cy:directed="1"/>
      <edge id="13572" label="Q9D0M3 (pp) Q9DCX2" source="12250" target="12366" cy:directed="1"/>
      <edge id="13571" label="Q9D0M3 (pp) P50516" source="12250" target="12293" cy:directed="1"/>
      <edge id="13570" label="Q9D0M3 (pp) Q91VR2" source="12250" target="12263" cy:directed="1"/>
      <edge id="13569" label="Q9D0M3 (pp) P19536" source="12250" target="12373" cy:directed="1"/>
      <edge id="13568" label="Q9D0M3 (pp) Q9DB77" source="12250" target="12405" cy:directed="1"/>
      <edge id="13567" label="Q9D0M3 (pp) P17751" source="12250" target="12297" cy:directed="1"/>
      <edge id="13566" label="Q9D0M3 (pp) Q91VD9" source="12250" target="12265" cy:directed="1"/>
      <edge id="13565" label="Q9D0M3 (pp) Q9WUM5" source="12250" target="12276" cy:directed="1"/>
      <edge id="13564" label="Q9D0M3 (pp) Q06185" source="12250" target="12271" cy:directed="1"/>
      <edge id="13563" label="Q9D0M3 (pp) P97450" source="12250" target="12430" cy:directed="1"/>
      <edge id="13562" label="Q9D0M3 (pp) Q9CQ69" source="12250" target="12234" cy:directed="1"/>
      <edge id="13561" label="Q9D0M3 (pp) Q9CQZ6" source="12250" target="12231" cy:directed="1"/>
      <edge id="13560" label="Q9D0M3 (pp) Q9ERS2" source="12250" target="12339" cy:directed="1"/>
      <edge id="13559" label="Q9D0M3 (pp) Q9D3D9" source="12250" target="12210" cy:directed="1"/>
      <edge id="13558" label="Q9D0M3 (pp) P97807" source="12250" target="12340" cy:directed="1"/>
      <edge id="13557" label="Q9D0M3 (pp) O09111" source="12250" target="12211" cy:directed="1"/>
      <edge id="13556" label="Q9D0M3 (pp) P70404" source="12250" target="12294" cy:directed="1"/>
      <edge id="13555" label="Q9D0M3 (pp) P62897" source="12250" target="12286" cy:directed="1"/>
      <edge id="13554" label="Q9D0M3 (pp) Q9DB20" source="12250" target="12239" cy:directed="1"/>
      <edge id="13553" label="Q9CZ13 (pp) Q99LY9" source="12249" target="12252" cy:directed="1"/>
      <edge id="13552" label="Q9CZ13 (pp) Q9CR68" source="12249" target="12267" cy:directed="1"/>
      <edge id="13551" label="Q9CZ13 (pp) Q9DB77" source="12249" target="12405" cy:directed="1"/>
      <edge id="13550" label="Q9CZ13 (pp) Q9DC69" source="12249" target="12407" cy:directed="1"/>
      <edge id="13549" label="Q9CZ13 (pp) Q99P72" source="12249" target="12678" cy:directed="1"/>
      <edge id="13548" label="Q9CZ13 (pp) Q9CQH3" source="12249" target="12240" cy:directed="1"/>
      <edge id="13547" label="Q9CZ13 (pp) Q8K3J1" source="12249" target="12404" cy:directed="1"/>
      <edge id="13546" label="Q9CZ13 (pp) Q91VR2" source="12249" target="12263" cy:directed="1"/>
      <edge id="13545" label="Q9CZ13 (pp) Q9D6J6" source="12249" target="12207" cy:directed="1"/>
      <edge id="13544" label="Q9CZ13 (pp) P19783" source="12249" target="12245" cy:directed="1"/>
      <edge id="13543" label="Q9CZ13 (pp) Q9WUM5" source="12249" target="12276" cy:directed="1"/>
      <edge id="13542" label="Q9CZ13 (pp) Q9Z1P6" source="12249" target="12299" cy:directed="1"/>
      <edge id="13541" label="Q9CZ13 (pp) Q9DCJ5" source="12249" target="12380" cy:directed="1"/>
      <edge id="13540" label="Q9CZ13 (pp) Q9CQ69" source="12249" target="12234" cy:directed="1"/>
      <edge id="13539" label="Q9CZ13 (pp) Q60597" source="12249" target="12511" cy:directed="1"/>
      <edge id="13538" label="Q9CZ13 (pp) Q8K1Z0" source="12249" target="12319" cy:directed="1"/>
      <edge id="13537" label="Q9CZ13 (pp) O09111" source="12249" target="12211" cy:directed="1"/>
      <edge id="13536" label="Q9CZ13 (pp) Q91YT0" source="12249" target="12379" cy:directed="1"/>
      <edge id="13535" label="Q9CZ13 (pp) Q9D3D9" source="12249" target="12210" cy:directed="1"/>
      <edge id="13534" label="Q9CZ13 (pp) Q91VD9" source="12249" target="12265" cy:directed="1"/>
      <edge id="13533" label="Q9CZ13 (pp) P67778" source="12249" target="12261" cy:directed="1"/>
      <edge id="13532" label="Q9CZ13 (pp) P97807" source="12249" target="12340" cy:directed="1"/>
      <edge id="13531" label="Q9CZ13 (pp) Q9DCS9" source="12249" target="12266" cy:directed="1"/>
      <edge id="13530" label="Q9CZ13 (pp) Q9ERS2" source="12249" target="12339" cy:directed="1"/>
      <edge id="13529" label="Q8BH95 (pp) Q9DBL1" source="12248" target="12451" cy:directed="1"/>
      <edge id="13528" label="Q8BH95 (pp) Q9DC69" source="12248" target="12407" cy:directed="1"/>
      <edge id="13527" label="Q8BH95 (pp) Q99LC5" source="12248" target="12315" cy:directed="1"/>
      <edge id="13526" label="Q8BH95 (pp) Q9CQ62" source="12248" target="12285" cy:directed="1"/>
      <edge id="13525" label="Q8BH95 (pp) Q9WUM5" source="12248" target="12276" cy:directed="1"/>
      <edge id="13524" label="Q8BH95 (pp) Q9DCJ5" source="12248" target="12380" cy:directed="1"/>
      <edge id="13523" label="Q8BH95 (pp) Q99MR8" source="12248" target="12625" cy:directed="1"/>
      <edge id="13522" label="Q8BH95 (pp) Q99JY0" source="12248" target="12384" cy:directed="1"/>
      <edge id="13521" label="Q8BH95 (pp) Q61425" source="12248" target="12314" cy:directed="1"/>
      <edge id="13520" label="Q8BH95 (pp) O08756" source="12248" target="12383" cy:directed="1"/>
      <edge id="13519" label="Q8BH95 (pp) Q99MN9" source="12248" target="12434" cy:directed="1"/>
      <edge id="13518" label="Q8BH95 (pp) Q8BMS1" source="12248" target="12516" cy:directed="1"/>
      <edge id="13517" label="Q8BH95 (pp) Q9JHI5" source="12248" target="12453" cy:directed="1"/>
      <edge id="13516" label="Q8BH95 (pp) P50544" source="12248" target="12459" cy:directed="1"/>
      <edge id="13515" label="Q8BH95 (pp) P51174" source="12248" target="12392" cy:directed="1"/>
      <edge id="13514" label="Q8BH95 (pp) Q8QZT1" source="12248" target="12557" cy:directed="1"/>
      <edge id="13513" label="Q8BH95 (pp) Q8BWT1" source="12248" target="12311" cy:directed="1"/>
      <edge id="13512" label="Q8BH95 (pp) Q9CZ13" source="12248" target="12249" cy:directed="1"/>
      <edge id="13511" label="P63038 (pp) P97807" source="12247" target="12340" cy:directed="1"/>
      <edge id="13510" label="P63038 (pp) P67778" source="12247" target="12261" cy:directed="1"/>
      <edge id="13509" label="P63038 (pp) O35658" source="12247" target="12364" cy:directed="1"/>
      <edge id="13508" label="P63038 (pp) P17156" source="12247" target="12578" cy:directed="1"/>
      <edge id="13507" label="P63038 (pp) Q61699" source="12247" target="12718" cy:directed="1"/>
      <edge id="13506" label="P63038 (pp) Q91VR2" source="12247" target="12263" cy:directed="1"/>
      <edge id="13505" label="P63038 (pp) Q921G7" source="12247" target="12310" cy:directed="1"/>
      <edge id="13504" label="P63038 (pp) Q8CGK3" source="12247" target="12758" cy:directed="1"/>
      <edge id="13503" label="P63038 (pp) Q925I1" source="12247" target="12589" cy:directed="1"/>
      <edge id="13502" label="P63038 (pp) P63037" source="12247" target="12279" cy:directed="1"/>
      <edge id="13501" label="P63038 (pp) Q8BIJ6" source="12247" target="12727" cy:directed="1"/>
      <edge id="13500" label="P63038 (pp) Q6PB66" source="12247" target="12498" cy:directed="1"/>
      <edge id="13499" label="P63038 (pp) Q9Z0X1" source="12247" target="12550" cy:directed="1"/>
      <edge id="13498" label="P63038 (pp) Q9WUM5" source="12247" target="12276" cy:directed="1"/>
      <edge id="13497" label="P63038 (pp) P15105" source="12247" target="12282" cy:directed="1"/>
      <edge id="13496" label="P63038 (pp) P52480" source="12247" target="12455" cy:directed="1"/>
      <edge id="13495" label="P63038 (pp) Q99LC5" source="12247" target="12315" cy:directed="1"/>
      <edge id="13494" label="P63038 (pp) P09411" source="12247" target="12298" cy:directed="1"/>
      <edge id="13493" label="P63038 (pp) P52196" source="12247" target="12268" cy:directed="1"/>
      <edge id="13492" label="Q8BK64 (pp) P11499" source="12246" target="12320" cy:directed="1"/>
      <edge id="13491" label="Q8BK64 (pp) Q61699" source="12246" target="12718" cy:directed="1"/>
      <edge id="13490" label="Q8BK64 (pp) P07901" source="12246" target="12508" cy:directed="1"/>
      <edge id="13489" label="Q8BK64 (pp) Q60864" source="12246" target="12374" cy:directed="1"/>
      <edge id="13488" label="Q8BK64 (pp) P63038" source="12246" target="12247" cy:directed="1"/>
      <edge id="13487" label="P19783 (pp) Q9DC69" source="12245" target="12407" cy:directed="1"/>
      <edge id="13486" label="P19783 (pp) P48771" source="12245" target="12303" cy:directed="1"/>
      <edge id="13485" label="P19783 (pp) Q9DCJ5" source="12245" target="12380" cy:directed="1"/>
      <edge id="13484" label="P19783 (pp) P00405" source="12245" target="12669" cy:directed="1"/>
      <edge id="13483" label="P19783 (pp) P43024" source="12245" target="12472" cy:directed="1"/>
      <edge id="13482" label="P19783 (pp) P56391" source="12245" target="12331" cy:directed="1"/>
      <edge id="13481" label="P19783 (pp) Q9CQQ7" source="12245" target="12409" cy:directed="1"/>
      <edge id="13480" label="P19783 (pp) Q99LX0" source="12245" target="12317" cy:directed="1"/>
      <edge id="13479" label="P19783 (pp) Q9DCX2" source="12245" target="12366" cy:directed="1"/>
      <edge id="13478" label="P19783 (pp) P17665" source="12245" target="12555" cy:directed="1"/>
      <edge id="13477" label="P19783 (pp) Q9ERS2" source="12245" target="12339" cy:directed="1"/>
      <edge id="13476" label="P19783 (pp) Q91VR2" source="12245" target="12263" cy:directed="1"/>
      <edge id="13475" label="P19783 (pp) Q06185" source="12245" target="12271" cy:directed="1"/>
      <edge id="13474" label="P19783 (pp) Q91YT0" source="12245" target="12379" cy:directed="1"/>
      <edge id="13473" label="P19783 (pp) Q9D3D9" source="12245" target="12210" cy:directed="1"/>
      <edge id="13472" label="P19783 (pp) P19536" source="12245" target="12373" cy:directed="1"/>
      <edge id="13471" label="P19783 (pp) Q9CR68" source="12245" target="12267" cy:directed="1"/>
      <edge id="13470" label="P19783 (pp) Q9CQ69" source="12245" target="12234" cy:directed="1"/>
      <edge id="13469" label="P19783 (pp) Q9CQH3" source="12245" target="12240" cy:directed="1"/>
      <edge id="13468" label="O88952 (pp) O70589" source="12244" target="12564" cy:directed="1"/>
      <edge id="13467" label="O88952 (pp) P60469" source="12244" target="12613" cy:directed="1"/>
      <edge id="13466" label="Q6P9K8 (pp) O70589" source="12243" target="12564" cy:directed="1"/>
      <edge id="13465" label="Q6P9K8 (pp) O88952" source="12243" target="12244" cy:directed="1"/>
      <edge id="13464" label="Q9Z2H5 (pp) Q99N28" source="12242" target="12372" cy:directed="1"/>
      <edge id="13463" label="Q3UHD9 (pp) Q9Z2H5" source="12241" target="12242" cy:directed="1"/>
      <edge id="13462" label="Q9CQH3 (pp) Q9D6J6" source="12240" target="12207" cy:directed="1"/>
      <edge id="13461" label="Q9DB20 (pp) Q9DB77" source="12239" target="12405" cy:directed="1"/>
      <edge id="13460" label="Q9DB20 (pp) Q91VR2" source="12239" target="12263" cy:directed="1"/>
      <edge id="13459" label="Q9DB20 (pp) Q9CPQ8" source="12239" target="12264" cy:directed="1"/>
      <edge id="13458" label="Q9DB20 (pp) Q9Z1P6" source="12239" target="12299" cy:directed="1"/>
      <edge id="13457" label="Q9DB20 (pp) Q03265" source="12239" target="12212" cy:directed="1"/>
      <edge id="13456" label="Q9DB20 (pp) P56480" source="12239" target="12258" cy:directed="1"/>
      <edge id="13455" label="Q9DB20 (pp) P43024" source="12239" target="12472" cy:directed="1"/>
      <edge id="13454" label="Q9DB20 (pp) Q9DCS9" source="12239" target="12266" cy:directed="1"/>
      <edge id="13453" label="Q9DB20 (pp) Q91VM9" source="12239" target="12406" cy:directed="1"/>
      <edge id="13452" label="Q9DB20 (pp) Q06185" source="12239" target="12271" cy:directed="1"/>
      <edge id="13451" label="Q9DB20 (pp) Q8K3J1" source="12239" target="12404" cy:directed="1"/>
      <edge id="13450" label="Q9DB20 (pp) Q78IK2" source="12239" target="12755" cy:directed="1"/>
      <edge id="13449" label="Q9DB20 (pp) P17751" source="12239" target="12297" cy:directed="1"/>
      <edge id="13448" label="Q9DB20 (pp) Q9WUM5" source="12239" target="12276" cy:directed="1"/>
      <edge id="13447" label="Q9DB20 (pp) Q91YT0" source="12239" target="12379" cy:directed="1"/>
      <edge id="13446" label="Q9DB20 (pp) Q9D3D9" source="12239" target="12210" cy:directed="1"/>
      <edge id="13445" label="Q9DB20 (pp) Q9ERS2" source="12239" target="12339" cy:directed="1"/>
      <edge id="13444" label="Q9DB20 (pp) P62073" source="12239" target="12355" cy:directed="1"/>
      <edge id="13443" label="Q9DB20 (pp) Q9CQQ7" source="12239" target="12409" cy:directed="1"/>
      <edge id="13442" label="Q9DB20 (pp) Q9DC69" source="12239" target="12407" cy:directed="1"/>
      <edge id="13441" label="Q9DB20 (pp) Q3UIU2" source="12239" target="12288" cy:directed="1"/>
      <edge id="13440" label="Q9DB20 (pp) P56391" source="12239" target="12331" cy:directed="1"/>
      <edge id="13439" label="Q9DB20 (pp) P19783" source="12239" target="12245" cy:directed="1"/>
      <edge id="13438" label="Q9DB20 (pp) Q9D6J6" source="12239" target="12207" cy:directed="1"/>
      <edge id="13437" label="Q9DB20 (pp) Q9CZ13" source="12239" target="12249" cy:directed="1"/>
      <edge id="13436" label="Q9DB20 (pp) P97807" source="12239" target="12340" cy:directed="1"/>
      <edge id="13435" label="Q9DB20 (pp) Q9CR68" source="12239" target="12267" cy:directed="1"/>
      <edge id="13434" label="Q9DB20 (pp) Q9CQ69" source="12239" target="12234" cy:directed="1"/>
      <edge id="13433" label="Q9DB20 (pp) P99029" source="12239" target="12356" cy:directed="1"/>
      <edge id="13432" label="Q9DB20 (pp) Q9CPP6" source="12239" target="12281" cy:directed="1"/>
      <edge id="13431" label="Q9DB20 (pp) Q9DCJ5" source="12239" target="12380" cy:directed="1"/>
      <edge id="13430" label="Q9DB20 (pp) Q99LX0" source="12239" target="12317" cy:directed="1"/>
      <edge id="13429" label="Q9DB20 (pp) Q9D6J5" source="12239" target="12487" cy:directed="1"/>
      <edge id="13428" label="Q9DB20 (pp) O09111" source="12239" target="12211" cy:directed="1"/>
      <edge id="13427" label="Q9DB20 (pp) Q9DCX2" source="12239" target="12366" cy:directed="1"/>
      <edge id="13426" label="Q9DB20 (pp) P67778" source="12239" target="12261" cy:directed="1"/>
      <edge id="13425" label="Q9DB20 (pp) Q9CQH3" source="12239" target="12240" cy:directed="1"/>
      <edge id="13424" label="P54071 (pp) P70404" source="12237" target="12294" cy:directed="1"/>
      <edge id="13423" label="P54071 (pp) Q60597" source="12237" target="12511" cy:directed="1"/>
      <edge id="13422" label="P54071 (pp) P06151" source="12237" target="12238" cy:directed="1"/>
      <edge id="13421" label="Q9D6R2 (pp) Q9WUM5" source="12236" target="12276" cy:directed="1"/>
      <edge id="13420" label="Q9D6R2 (pp) Q9D2G2" source="12236" target="12287" cy:directed="1"/>
      <edge id="13419" label="Q9D6R2 (pp) P54071" source="12236" target="12237" cy:directed="1"/>
      <edge id="13418" label="Q9D6R2 (pp) Q60597" source="12236" target="12511" cy:directed="1"/>
      <edge id="13417" label="Q9D6R2 (pp) Q8K3J1" source="12236" target="12404" cy:directed="1"/>
      <edge id="13416" label="Q9D6R2 (pp) Q91VR2" source="12236" target="12263" cy:directed="1"/>
      <edge id="13415" label="Q9D6R2 (pp) Q8BWF0" source="12236" target="12623" cy:directed="1"/>
      <edge id="13414" label="Q9D6R2 (pp) P16054" source="12236" target="12443" cy:directed="1"/>
      <edge id="13413" label="Q9D6R2 (pp) P70404" source="12236" target="12294" cy:directed="1"/>
      <edge id="13412" label="P08249 (pp) Q9DCS9" source="12235" target="12266" cy:directed="1"/>
      <edge id="13411" label="P08249 (pp) Q9CQQ7" source="12235" target="12409" cy:directed="1"/>
      <edge id="13410" label="P08249 (pp) Q9CQH3" source="12235" target="12240" cy:directed="1"/>
      <edge id="13409" label="P08249 (pp) Q03265" source="12235" target="12212" cy:directed="1"/>
      <edge id="13408" label="P08249 (pp) P48962" source="12235" target="12698" cy:directed="1"/>
      <edge id="13407" label="P08249 (pp) P06745" source="12235" target="12464" cy:directed="1"/>
      <edge id="13406" label="P08249 (pp) Q9D0M3" source="12235" target="12250" cy:directed="1"/>
      <edge id="13405" label="P08249 (pp) Q9CZ13" source="12235" target="12249" cy:directed="1"/>
      <edge id="13404" label="P08249 (pp) Q9CQZ5" source="12235" target="12206" cy:directed="1"/>
      <edge id="13403" label="P08249 (pp) P26443" source="12235" target="12334" cy:directed="1"/>
      <edge id="13402" label="P08249 (pp) Q9WUM5" source="12235" target="12276" cy:directed="1"/>
      <edge id="13401" label="P08249 (pp) P97450" source="12235" target="12430" cy:directed="1"/>
      <edge id="13400" label="P08249 (pp) Q9DCJ5" source="12235" target="12380" cy:directed="1"/>
      <edge id="13399" label="P08249 (pp) Q9D2G2" source="12235" target="12287" cy:directed="1"/>
      <edge id="13398" label="P08249 (pp) P52480" source="12235" target="12455" cy:directed="1"/>
      <edge id="13397" label="P08249 (pp) P54071" source="12235" target="12237" cy:directed="1"/>
      <edge id="13396" label="P08249 (pp) Q9DB20" source="12235" target="12239" cy:directed="1"/>
      <edge id="13395" label="P08249 (pp) Q91VD9" source="12235" target="12265" cy:directed="1"/>
      <edge id="13394" label="P08249 (pp) P19783" source="12235" target="12245" cy:directed="1"/>
      <edge id="13393" label="P08249 (pp) Q9Z2I9" source="12235" target="12458" cy:directed="1"/>
      <edge id="13392" label="P08249 (pp) Q91YT0" source="12235" target="12379" cy:directed="1"/>
      <edge id="13391" label="P08249 (pp) Q05920" source="12235" target="12254" cy:directed="1"/>
      <edge id="13390" label="P08249 (pp) Q9DCX2" source="12235" target="12366" cy:directed="1"/>
      <edge id="13389" label="P08249 (pp) Q99LX0" source="12235" target="12317" cy:directed="1"/>
      <edge id="13388" label="P08249 (pp) O09111" source="12235" target="12211" cy:directed="1"/>
      <edge id="13387" label="P08249 (pp) Q99KI0" source="12235" target="12338" cy:directed="1"/>
      <edge id="13386" label="P08249 (pp) Q8VEM8" source="12235" target="12349" cy:directed="1"/>
      <edge id="13385" label="P08249 (pp) Q9CQJ8" source="12235" target="12270" cy:directed="1"/>
      <edge id="13384" label="P08249 (pp) Q8BMF4" source="12235" target="12253" cy:directed="1"/>
      <edge id="13383" label="P08249 (pp) Q8BMF3" source="12235" target="12544" cy:directed="1"/>
      <edge id="13382" label="P08249 (pp) Q8K3J1" source="12235" target="12404" cy:directed="1"/>
      <edge id="13381" label="P08249 (pp) Q9DC69" source="12235" target="12407" cy:directed="1"/>
      <edge id="13380" label="P08249 (pp) P09411" source="12235" target="12298" cy:directed="1"/>
      <edge id="13379" label="P08249 (pp) Q9DB77" source="12235" target="12405" cy:directed="1"/>
      <edge id="13378" label="P08249 (pp) Q9CR68" source="12235" target="12267" cy:directed="1"/>
      <edge id="13377" label="P08249 (pp) Q9CQC7" source="12235" target="12494" cy:directed="1"/>
      <edge id="13376" label="P08249 (pp) Q9D6J6" source="12235" target="12207" cy:directed="1"/>
      <edge id="13375" label="P08249 (pp) P63038" source="12235" target="12247" cy:directed="1"/>
      <edge id="13374" label="P08249 (pp) Q8BH04" source="12235" target="12624" cy:directed="1"/>
      <edge id="13373" label="P08249 (pp) Q9DC70" source="12235" target="12272" cy:directed="1"/>
      <edge id="13372" label="P08249 (pp) P05202" source="12235" target="12216" cy:directed="1"/>
      <edge id="13371" label="P08249 (pp) Q8K2B3" source="12235" target="12347" cy:directed="1"/>
      <edge id="13370" label="P08249 (pp) Q9D855" source="12235" target="12403" cy:directed="1"/>
      <edge id="13369" label="P08249 (pp) Q9D051" source="12235" target="12209" cy:directed="1"/>
      <edge id="13368" label="P08249 (pp) Q8BGH2" source="12235" target="12316" cy:directed="1"/>
      <edge id="13367" label="P08249 (pp) Q60931" source="12235" target="12556" cy:directed="1"/>
      <edge id="13366" label="P08249 (pp) Q64521" source="12235" target="12425" cy:directed="1"/>
      <edge id="13365" label="P08249 (pp) P97807" source="12235" target="12340" cy:directed="1"/>
      <edge id="13364" label="P08249 (pp) Q9D3D9" source="12235" target="12210" cy:directed="1"/>
      <edge id="13363" label="P08249 (pp) P56480" source="12235" target="12258" cy:directed="1"/>
      <edge id="13362" label="P08249 (pp) Q9DCD0" source="12235" target="12222" cy:directed="1"/>
      <edge id="13361" label="P08249 (pp) P17751" source="12235" target="12297" cy:directed="1"/>
      <edge id="13360" label="P08249 (pp) O35658" source="12235" target="12364" cy:directed="1"/>
      <edge id="13359" label="P08249 (pp) P70404" source="12235" target="12294" cy:directed="1"/>
      <edge id="13358" label="P08249 (pp) Q91VR2" source="12235" target="12263" cy:directed="1"/>
      <edge id="13357" label="P08249 (pp) Q06185" source="12235" target="12271" cy:directed="1"/>
      <edge id="13356" label="P08249 (pp) Q9D6R2" source="12235" target="12236" cy:directed="1"/>
      <edge id="13355" label="Q9CQ69 (pp) Q99LX0" source="12234" target="12317" cy:directed="1"/>
      <edge id="13354" label="Q9CQ69 (pp) Q9CQQ7" source="12234" target="12409" cy:directed="1"/>
      <edge id="13353" label="Q9CQ69 (pp) O09111" source="12234" target="12211" cy:directed="1"/>
      <edge id="13352" label="Q9CQ69 (pp) P17665" source="12234" target="12555" cy:directed="1"/>
      <edge id="13351" label="Q9CQ69 (pp) Q3UIU2" source="12234" target="12288" cy:directed="1"/>
      <edge id="13350" label="Q9CQ69 (pp) Q91VR2" source="12234" target="12263" cy:directed="1"/>
      <edge id="13349" label="Q9CQ69 (pp) P00405" source="12234" target="12669" cy:directed="1"/>
      <edge id="13348" label="Q9CQ69 (pp) Q9D3D9" source="12234" target="12210" cy:directed="1"/>
      <edge id="13347" label="Q9CQ69 (pp) Q9ERS2" source="12234" target="12339" cy:directed="1"/>
      <edge id="13346" label="Q9CQ69 (pp) Q9DC69" source="12234" target="12407" cy:directed="1"/>
      <edge id="13345" label="Q9CQ69 (pp) Q9CQH3" source="12234" target="12240" cy:directed="1"/>
      <edge id="13344" label="Q9CQ69 (pp) Q9DCJ5" source="12234" target="12380" cy:directed="1"/>
      <edge id="13343" label="Q9CQ69 (pp) Q9D6J6" source="12234" target="12207" cy:directed="1"/>
      <edge id="13342" label="Q9CQ69 (pp) Q99LY9" source="12234" target="12252" cy:directed="1"/>
      <edge id="13341" label="Q9CQ69 (pp) Q8K3J1" source="12234" target="12404" cy:directed="1"/>
      <edge id="13340" label="Q9CQ69 (pp) P56391" source="12234" target="12331" cy:directed="1"/>
      <edge id="13339" label="Q9DCT2 (pp) P97450" source="12233" target="12430" cy:directed="1"/>
      <edge id="13338" label="Q9DCT2 (pp) Q99LX0" source="12233" target="12317" cy:directed="1"/>
      <edge id="13337" label="Q9DCT2 (pp) Q06185" source="12233" target="12271" cy:directed="1"/>
      <edge id="13336" label="Q9DCT2 (pp) P70404" source="12233" target="12294" cy:directed="1"/>
      <edge id="13335" label="Q9DCT2 (pp) Q9CQZ5" source="12233" target="12206" cy:directed="1"/>
      <edge id="13334" label="Q9DCT2 (pp) Q80Y14" source="12233" target="12602" cy:directed="1"/>
      <edge id="13333" label="Q9DCT2 (pp) Q9CZU6" source="12233" target="12221" cy:directed="1"/>
      <edge id="13332" label="Q9DCT2 (pp) Q9CR62" source="12233" target="12746" cy:directed="1"/>
      <edge id="13331" label="Q9DCT2 (pp) Q9Z1P6" source="12233" target="12299" cy:directed="1"/>
      <edge id="13330" label="Q9DCT2 (pp) P97807" source="12233" target="12340" cy:directed="1"/>
      <edge id="13329" label="Q9DCT2 (pp) P50516" source="12233" target="12293" cy:directed="1"/>
      <edge id="13328" label="Q9DCT2 (pp) Q9D0S9" source="12233" target="12273" cy:directed="1"/>
      <edge id="13327" label="Q9DCT2 (pp) Q9CPQ1" source="12233" target="12604" cy:directed="1"/>
      <edge id="13326" label="Q9DCT2 (pp) P08249" source="12233" target="12235" cy:directed="1"/>
      <edge id="13325" label="Q9DCT2 (pp) P62073" source="12233" target="12355" cy:directed="1"/>
      <edge id="13324" label="Q9DCT2 (pp) P68510" source="12233" target="12213" cy:directed="1"/>
      <edge id="13323" label="Q9DCT2 (pp) O09111" source="12233" target="12211" cy:directed="1"/>
      <edge id="13322" label="Q9DCT2 (pp) Q62425" source="12233" target="12545" cy:directed="1"/>
      <edge id="13321" label="Q9DCT2 (pp) Q9CQH3" source="12233" target="12240" cy:directed="1"/>
      <edge id="13320" label="Q9DCT2 (pp) O88441" source="12233" target="12295" cy:directed="1"/>
      <edge id="13319" label="Q9DCT2 (pp) Q91VR2" source="12233" target="12263" cy:directed="1"/>
      <edge id="13318" label="Q9DCT2 (pp) Q99KI0" source="12233" target="12338" cy:directed="1"/>
      <edge id="13317" label="Q9DCT2 (pp) Q9D0M3" source="12233" target="12250" cy:directed="1"/>
      <edge id="13316" label="Q9DCT2 (pp) Q9CQ54" source="12233" target="12232" cy:directed="1"/>
      <edge id="13315" label="Q9DCT2 (pp) Q9CPP6" source="12233" target="12281" cy:directed="1"/>
      <edge id="13314" label="Q9DCT2 (pp) Q8VEM8" source="12233" target="12349" cy:directed="1"/>
      <edge id="13313" label="Q9DCT2 (pp) Q9DB20" source="12233" target="12239" cy:directed="1"/>
      <edge id="13312" label="Q9DCT2 (pp) Q9CZ13" source="12233" target="12249" cy:directed="1"/>
      <edge id="13311" label="Q9DCT2 (pp) P56379" source="12233" target="12415" cy:directed="1"/>
      <edge id="13310" label="Q9DCT2 (pp) Q91YT0" source="12233" target="12379" cy:directed="1"/>
      <edge id="13309" label="Q9DCT2 (pp) Q8BH95" source="12233" target="12248" cy:directed="1"/>
      <edge id="13308" label="Q9DCT2 (pp) Q91VD9" source="12233" target="12265" cy:directed="1"/>
      <edge id="13307" label="Q9DCT2 (pp) P52503" source="12233" target="12352" cy:directed="1"/>
      <edge id="13306" label="Q9DCT2 (pp) Q9CQ75" source="12233" target="12389" cy:directed="1"/>
      <edge id="13305" label="Q9DCT2 (pp) Q8K2B3" source="12233" target="12347" cy:directed="1"/>
      <edge id="13304" label="Q9DCT2 (pp) P56480" source="12233" target="12258" cy:directed="1"/>
      <edge id="13303" label="Q9DCT2 (pp) P09671" source="12233" target="12444" cy:directed="1"/>
      <edge id="13302" label="Q9DCT2 (pp) Q9DCJ5" source="12233" target="12380" cy:directed="1"/>
      <edge id="13301" label="Q9DCT2 (pp) Q9CQR4" source="12233" target="12358" cy:directed="1"/>
      <edge id="13300" label="Q9DCT2 (pp) Q9DCX2" source="12233" target="12366" cy:directed="1"/>
      <edge id="13299" label="Q9DCT2 (pp) Q9D855" source="12233" target="12403" cy:directed="1"/>
      <edge id="13298" label="Q9DCT2 (pp) Q9DC69" source="12233" target="12407" cy:directed="1"/>
      <edge id="13297" label="Q9DCT2 (pp) Q9D051" source="12233" target="12209" cy:directed="1"/>
      <edge id="13296" label="Q9DCT2 (pp) P99029" source="12233" target="12356" cy:directed="1"/>
      <edge id="13295" label="Q9DCT2 (pp) Q9CQZ6" source="12233" target="12231" cy:directed="1"/>
      <edge id="13294" label="Q9DCT2 (pp) P42125" source="12233" target="12519" cy:directed="1"/>
      <edge id="13293" label="Q9DCT2 (pp) Q9CR68" source="12233" target="12267" cy:directed="1"/>
      <edge id="13292" label="Q9DCT2 (pp) Q7TMF3" source="12233" target="12365" cy:directed="1"/>
      <edge id="13291" label="Q9DCT2 (pp) Q99LY9" source="12233" target="12252" cy:directed="1"/>
      <edge id="13290" label="Q9DCT2 (pp) Q99LC5" source="12233" target="12315" cy:directed="1"/>
      <edge id="13289" label="Q9DCT2 (pp) Q9CXZ1" source="12233" target="12396" cy:directed="1"/>
      <edge id="13288" label="Q9DCT2 (pp) Q9CQJ8" source="12233" target="12270" cy:directed="1"/>
      <edge id="13287" label="Q9DCT2 (pp) Q9WUM5" source="12233" target="12276" cy:directed="1"/>
      <edge id="13286" label="Q9DCT2 (pp) Q9CQC7" source="12233" target="12494" cy:directed="1"/>
      <edge id="13285" label="Q9DCT2 (pp) Q8BGH2" source="12233" target="12316" cy:directed="1"/>
      <edge id="13284" label="Q9DCT2 (pp) Q03265" source="12233" target="12212" cy:directed="1"/>
      <edge id="13283" label="Q9DCT2 (pp) Q9ERS2" source="12233" target="12339" cy:directed="1"/>
      <edge id="13282" label="Q9DCT2 (pp) P56391" source="12233" target="12331" cy:directed="1"/>
      <edge id="13281" label="Q9DCT2 (pp) Q9D6J5" source="12233" target="12487" cy:directed="1"/>
      <edge id="13280" label="Q9DCT2 (pp) Q91WD5" source="12233" target="12346" cy:directed="1"/>
      <edge id="13279" label="Q9DCT2 (pp) Q8K3J1" source="12233" target="12404" cy:directed="1"/>
      <edge id="13278" label="Q9DCT2 (pp) P17751" source="12233" target="12297" cy:directed="1"/>
      <edge id="13277" label="Q9DCT2 (pp) P48771" source="12233" target="12303" cy:directed="1"/>
      <edge id="13276" label="Q9DCT2 (pp) Q9D3D9" source="12233" target="12210" cy:directed="1"/>
      <edge id="13275" label="Q9DCT2 (pp) Q9DCS9" source="12233" target="12266" cy:directed="1"/>
      <edge id="13274" label="Q9DCT2 (pp) Q9D6J6" source="12233" target="12207" cy:directed="1"/>
      <edge id="13273" label="Q9DCT2 (pp) Q9CQQ7" source="12233" target="12409" cy:directed="1"/>
      <edge id="13272" label="Q9DCT2 (pp) Q9DB77" source="12233" target="12405" cy:directed="1"/>
      <edge id="13271" label="Q9DCT2 (pp) Q3UIU2" source="12233" target="12288" cy:directed="1"/>
      <edge id="13270" label="Q9DCT2 (pp) Q9DC70" source="12233" target="12272" cy:directed="1"/>
      <edge id="13269" label="Q9DCT2 (pp) P19536" source="12233" target="12373" cy:directed="1"/>
      <edge id="13268" label="Q9DCT2 (pp) Q8K1Z0" source="12233" target="12319" cy:directed="1"/>
      <edge id="13267" label="Q9DCT2 (pp) Q9CQA3" source="12233" target="12312" cy:directed="1"/>
      <edge id="13266" label="Q9DCT2 (pp) O70325" source="12233" target="12302" cy:directed="1"/>
      <edge id="13265" label="Q9DCT2 (pp) Q99LC3" source="12233" target="12251" cy:directed="1"/>
      <edge id="13264" label="Q9DCT2 (pp) P19783" source="12233" target="12245" cy:directed="1"/>
      <edge id="13263" label="Q9DCT2 (pp) Q9CQ69" source="12233" target="12234" cy:directed="1"/>
      <edge id="13262" label="Q9CQ54 (pp) Q3UIU2" source="12232" target="12288" cy:directed="1"/>
      <edge id="13261" label="Q9CQ54 (pp) Q9Z1P6" source="12232" target="12299" cy:directed="1"/>
      <edge id="13260" label="Q9CQ54 (pp) Q9CQH3" source="12232" target="12240" cy:directed="1"/>
      <edge id="13259" label="Q9CQ54 (pp) Q99LY9" source="12232" target="12252" cy:directed="1"/>
      <edge id="13258" label="Q9CQ54 (pp) Q9DCS9" source="12232" target="12266" cy:directed="1"/>
      <edge id="13257" label="Q9CQ54 (pp) Q9D6J6" source="12232" target="12207" cy:directed="1"/>
      <edge id="13256" label="Q9CQ54 (pp) Q9CQ69" source="12232" target="12234" cy:directed="1"/>
      <edge id="13255" label="Q9CQ54 (pp) Q8K3J1" source="12232" target="12404" cy:directed="1"/>
      <edge id="13254" label="Q9CQ54 (pp) Q06185" source="12232" target="12271" cy:directed="1"/>
      <edge id="13253" label="Q9CQ54 (pp) Q9DCJ5" source="12232" target="12380" cy:directed="1"/>
      <edge id="13252" label="Q9CQ54 (pp) Q9CQQ7" source="12232" target="12409" cy:directed="1"/>
      <edge id="13251" label="Q9CQ54 (pp) Q9DC69" source="12232" target="12407" cy:directed="1"/>
      <edge id="13250" label="Q9CQ54 (pp) O09111" source="12232" target="12211" cy:directed="1"/>
      <edge id="13249" label="Q9CQ54 (pp) Q91YT0" source="12232" target="12379" cy:directed="1"/>
      <edge id="13248" label="Q9CQZ6 (pp) Q9CQ69" source="12231" target="12234" cy:directed="1"/>
      <edge id="13247" label="Q9CQZ6 (pp) Q99LX0" source="12231" target="12317" cy:directed="1"/>
      <edge id="13246" label="Q9CQZ6 (pp) Q9CQQ7" source="12231" target="12409" cy:directed="1"/>
      <edge id="13245" label="Q9CQZ6 (pp) P48771" source="12231" target="12303" cy:directed="1"/>
      <edge id="13244" label="Q9CQZ6 (pp) Q9DCJ5" source="12231" target="12380" cy:directed="1"/>
      <edge id="13243" label="Q9CQZ6 (pp) Q99LC5" source="12231" target="12315" cy:directed="1"/>
      <edge id="13242" label="Q9CQZ6 (pp) Q9CPQ8" source="12231" target="12264" cy:directed="1"/>
      <edge id="13241" label="Q9CQZ6 (pp) Q9Z1P6" source="12231" target="12299" cy:directed="1"/>
      <edge id="13240" label="Q9CQZ6 (pp) Q9DC69" source="12231" target="12407" cy:directed="1"/>
      <edge id="13239" label="Q9CQZ6 (pp) P56391" source="12231" target="12331" cy:directed="1"/>
      <edge id="13238" label="Q9CQZ6 (pp) Q9DB77" source="12231" target="12405" cy:directed="1"/>
      <edge id="13237" label="Q9CQZ6 (pp) Q9DCX2" source="12231" target="12366" cy:directed="1"/>
      <edge id="13236" label="Q9CQZ6 (pp) Q99LY9" source="12231" target="12252" cy:directed="1"/>
      <edge id="13235" label="Q9CQZ6 (pp) Q91VR2" source="12231" target="12263" cy:directed="1"/>
      <edge id="13234" label="Q9CQZ6 (pp) Q91YT0" source="12231" target="12379" cy:directed="1"/>
      <edge id="13233" label="Q9CQZ6 (pp) Q8K3J1" source="12231" target="12404" cy:directed="1"/>
      <edge id="13232" label="Q9CQZ6 (pp) Q9ERS2" source="12231" target="12339" cy:directed="1"/>
      <edge id="13231" label="Q9CQZ6 (pp) Q62425" source="12231" target="12545" cy:directed="1"/>
      <edge id="13230" label="Q9CQZ6 (pp) Q9WUM5" source="12231" target="12276" cy:directed="1"/>
      <edge id="13229" label="Q9CQZ6 (pp) Q9D6J6" source="12231" target="12207" cy:directed="1"/>
      <edge id="13228" label="Q9CQZ6 (pp) Q06185" source="12231" target="12271" cy:directed="1"/>
      <edge id="13227" label="Q9CQZ6 (pp) Q9DCS9" source="12231" target="12266" cy:directed="1"/>
      <edge id="13226" label="Q9CQZ6 (pp) Q9CR68" source="12231" target="12267" cy:directed="1"/>
      <edge id="13225" label="Q9CQZ6 (pp) Q9CQH3" source="12231" target="12240" cy:directed="1"/>
      <edge id="13224" label="Q9CQZ6 (pp) Q3UIU2" source="12231" target="12288" cy:directed="1"/>
      <edge id="13223" label="Q9CQZ6 (pp) Q99LC3" source="12231" target="12251" cy:directed="1"/>
      <edge id="13222" label="Q9CQZ6 (pp) Q9CQ54" source="12231" target="12232" cy:directed="1"/>
      <edge id="13221" label="Q76MZ3 (pp) Q9DC28" source="12230" target="12652" cy:directed="1"/>
      <edge id="13220" label="Q76MZ3 (pp) Q61151" source="12230" target="12753" cy:directed="1"/>
      <edge id="13219" label="Q76MZ3 (pp) P18052" source="12230" target="12414" cy:directed="1"/>
      <edge id="13218" label="Q76MZ3 (pp) P61982" source="12230" target="12509" cy:directed="1"/>
      <edge id="13217" label="Q76MZ3 (pp) P62259" source="12230" target="12225" cy:directed="1"/>
      <edge id="13216" label="Q76MZ3 (pp) P50396" source="12230" target="12647" cy:directed="1"/>
      <edge id="13215" label="Q76MZ3 (pp) Q60996" source="12230" target="12586" cy:directed="1"/>
      <edge id="13214" label="Q76MZ3 (pp) Q99KJ8" source="12230" target="12336" cy:directed="1"/>
      <edge id="13213" label="Q76MZ3 (pp) P35438" source="12230" target="12215" cy:directed="1"/>
      <edge id="13212" label="Q76MZ3 (pp) P63101" source="12230" target="12479" cy:directed="1"/>
      <edge id="13211" label="Q76MZ3 (pp) O08788" source="12230" target="12337" cy:directed="1"/>
      <edge id="13210" label="Q76MZ3 (pp) Q6P1F6" source="12230" target="12629" cy:directed="1"/>
      <edge id="13209" label="P63330 (pp) Q6P1F6" source="12229" target="12629" cy:directed="1"/>
      <edge id="13208" label="P63330 (pp) P35438" source="12229" target="12215" cy:directed="1"/>
      <edge id="13207" label="P63330 (pp) Q61151" source="12229" target="12753" cy:directed="1"/>
      <edge id="13206" label="P63330 (pp) Q60996" source="12229" target="12586" cy:directed="1"/>
      <edge id="13205" label="P63330 (pp) Q76MZ3" source="12229" target="12230" cy:directed="1"/>
      <edge id="13204" label="P16546 (pp) O08788" source="12228" target="12337" cy:directed="1"/>
      <edge id="13203" label="P16546 (pp) Q9CQV8" source="12228" target="12357" cy:directed="1"/>
      <edge id="13202" label="Q8C8R3 (pp) P11627" source="12227" target="12561" cy:directed="1"/>
      <edge id="13201" label="Q8C8R3 (pp) P16546" source="12227" target="12228" cy:directed="1"/>
      <edge id="13200" label="P47757 (pp) O89053" source="12226" target="12794" cy:directed="1"/>
      <edge id="13199" label="P62259 (pp) Q812A2" source="12225" target="12800" cy:directed="1"/>
      <edge id="13198" label="P62259 (pp) Q3UTJ2" source="12225" target="12465" cy:directed="1"/>
      <edge id="13197" label="P62259 (pp) Q68FF6" source="12225" target="12583" cy:directed="1"/>
      <edge id="13196" label="P62259 (pp) Q61316" source="12225" target="12741" cy:directed="1"/>
      <edge id="13195" label="P62259 (pp) P30999" source="12225" target="12584" cy:directed="1"/>
      <edge id="13194" label="P62259 (pp) Q03265" source="12225" target="12212" cy:directed="1"/>
      <edge id="13193" label="P62259 (pp) Q9DC28" source="12225" target="12652" cy:directed="1"/>
      <edge id="13192" label="P62259 (pp) P16858" source="12225" target="12559" cy:directed="1"/>
      <edge id="13191" label="P62259 (pp) Q9QWI6" source="12225" target="12480" cy:directed="1"/>
      <edge id="13190" label="P62259 (pp) P63101" source="12225" target="12479" cy:directed="1"/>
      <edge id="13189" label="P62259 (pp) P10637" source="12225" target="12534" cy:directed="1"/>
      <edge id="13188" label="P62259 (pp) O88935" source="12225" target="12431" cy:directed="1"/>
      <edge id="13187" label="P62259 (pp) Q9JLM8" source="12225" target="12428" cy:directed="1"/>
      <edge id="13186" label="P62259 (pp) P46660" source="12225" target="12401" cy:directed="1"/>
      <edge id="13185" label="P62259 (pp) P47757" source="12225" target="12226" cy:directed="1"/>
      <edge id="13184" label="Q9Z1G3 (pp) P23506" source="12224" target="12486" cy:directed="1"/>
      <edge id="13183" label="Q9Z1G3 (pp) P63082" source="12224" target="12448" cy:directed="1"/>
      <edge id="13182" label="Q9Z1G3 (pp) Q8BVE3" source="12224" target="12370" cy:directed="1"/>
      <edge id="13181" label="Q9Z1G3 (pp) Q91VM9" source="12224" target="12406" cy:directed="1"/>
      <edge id="13180" label="Q9Z1G3 (pp) P50516" source="12224" target="12293" cy:directed="1"/>
      <edge id="13179" label="Q9Z1G3 (pp) Q9Z1G4" source="12224" target="12275" cy:directed="1"/>
      <edge id="13178" label="Q9Z1G3 (pp) Q9WTT4" source="12224" target="12489" cy:directed="1"/>
      <edge id="13177" label="Q9Z1G3 (pp) P62331" source="12224" target="12318" cy:directed="1"/>
      <edge id="13176" label="P51863 (pp) Q9WTT4" source="12223" target="12489" cy:directed="1"/>
      <edge id="13175" label="P51863 (pp) P50518" source="12223" target="12369" cy:directed="1"/>
      <edge id="13174" label="P51863 (pp) Q9EPJ9" source="12223" target="12670" cy:directed="1"/>
      <edge id="13173" label="P51863 (pp) Q9Z1G4" source="12223" target="12275" cy:directed="1"/>
      <edge id="13172" label="P51863 (pp) P57746" source="12223" target="12292" cy:directed="1"/>
      <edge id="13171" label="P51863 (pp) P50516" source="12223" target="12293" cy:directed="1"/>
      <edge id="13170" label="P51863 (pp) Q8BVE3" source="12223" target="12370" cy:directed="1"/>
      <edge id="13169" label="P51863 (pp) P63082" source="12223" target="12448" cy:directed="1"/>
      <edge id="13168" label="P51863 (pp) Q9Z1G3" source="12223" target="12224" cy:directed="1"/>
      <edge id="13167" label="Q9DCD0 (pp) Q8CAQ8" source="12222" target="12553" cy:directed="1"/>
      <edge id="13166" label="Q9DCD0 (pp) P06151" source="12222" target="12238" cy:directed="1"/>
      <edge id="13165" label="Q9DCD0 (pp) Q91ZJ5" source="12222" target="12614" cy:directed="1"/>
      <edge id="13164" label="Q9DCD0 (pp) Q8BMS1" source="12222" target="12516" cy:directed="1"/>
      <edge id="13163" label="Q9DCD0 (pp) Q9D0F9" source="12222" target="12635" cy:directed="1"/>
      <edge id="13162" label="Q9CZU6 (pp) P19096" source="12221" target="12686" cy:directed="1"/>
      <edge id="13161" label="Q9CZU6 (pp) Q9CR68" source="12221" target="12267" cy:directed="1"/>
      <edge id="13160" label="Q9CZU6 (pp) Q9CZ13" source="12221" target="12249" cy:directed="1"/>
      <edge id="13159" label="Q9CZU6 (pp) Q9D6J6" source="12221" target="12207" cy:directed="1"/>
      <edge id="13158" label="Q9CZU6 (pp) Q05920" source="12221" target="12254" cy:directed="1"/>
      <edge id="13157" label="Q9CZU6 (pp) Q9D2G2" source="12221" target="12287" cy:directed="1"/>
      <edge id="13156" label="Q9CZU6 (pp) P56480" source="12221" target="12258" cy:directed="1"/>
      <edge id="13155" label="Q9CZU6 (pp) Q8QZT1" source="12221" target="12557" cy:directed="1"/>
      <edge id="13154" label="Q9CZU6 (pp) Q9WUM5" source="12221" target="12276" cy:directed="1"/>
      <edge id="13153" label="Q9CZU6 (pp) P70404" source="12221" target="12294" cy:directed="1"/>
      <edge id="13152" label="Q9CZU6 (pp) Q9D6R2" source="12221" target="12236" cy:directed="1"/>
      <edge id="13151" label="Q9CZU6 (pp) Q9DB20" source="12221" target="12239" cy:directed="1"/>
      <edge id="13150" label="Q9CZU6 (pp) Q60597" source="12221" target="12511" cy:directed="1"/>
      <edge id="13149" label="Q9CZU6 (pp) Q8BGH2" source="12221" target="12316" cy:directed="1"/>
      <edge id="13148" label="Q9CZU6 (pp) P35486" source="12221" target="12439" cy:directed="1"/>
      <edge id="13147" label="Q9CZU6 (pp) Q8BH04" source="12221" target="12624" cy:directed="1"/>
      <edge id="13146" label="Q9CZU6 (pp) Q8BMF4" source="12221" target="12253" cy:directed="1"/>
      <edge id="13145" label="Q9CZU6 (pp) Q99JY0" source="12221" target="12384" cy:directed="1"/>
      <edge id="13144" label="Q9CZU6 (pp) Q9CQA3" source="12221" target="12312" cy:directed="1"/>
      <edge id="13143" label="Q9CZU6 (pp) Q9D0M3" source="12221" target="12250" cy:directed="1"/>
      <edge id="13142" label="Q9CZU6 (pp) P09671" source="12221" target="12444" cy:directed="1"/>
      <edge id="13141" label="Q9CZU6 (pp) P52480" source="12221" target="12455" cy:directed="1"/>
      <edge id="13140" label="Q9CZU6 (pp) Q03265" source="12221" target="12212" cy:directed="1"/>
      <edge id="13139" label="Q9CZU6 (pp) Q91YT0" source="12221" target="12379" cy:directed="1"/>
      <edge id="13138" label="Q9CZU6 (pp) Q91WD5" source="12221" target="12346" cy:directed="1"/>
      <edge id="13137" label="Q9CZU6 (pp) Q8BWT1" source="12221" target="12311" cy:directed="1"/>
      <edge id="13136" label="Q9CZU6 (pp) Q99KI0" source="12221" target="12338" cy:directed="1"/>
      <edge id="13135" label="Q9CZU6 (pp) Q8K2B3" source="12221" target="12347" cy:directed="1"/>
      <edge id="13134" label="Q9CZU6 (pp) P06151" source="12221" target="12238" cy:directed="1"/>
      <edge id="13133" label="Q9CZU6 (pp) P97807" source="12221" target="12340" cy:directed="1"/>
      <edge id="13132" label="Q9CZU6 (pp) Q91VR2" source="12221" target="12263" cy:directed="1"/>
      <edge id="13131" label="Q9CZU6 (pp) P08249" source="12221" target="12235" cy:directed="1"/>
      <edge id="13130" label="Q9CZU6 (pp) P26443" source="12221" target="12334" cy:directed="1"/>
      <edge id="13129" label="Q9CZU6 (pp) Q8BMF3" source="12221" target="12544" cy:directed="1"/>
      <edge id="13128" label="Q9CZU6 (pp) Q8BKZ9" source="12221" target="12513" cy:directed="1"/>
      <edge id="13127" label="Q9CZU6 (pp) P05202" source="12221" target="12216" cy:directed="1"/>
      <edge id="13126" label="Q9CZU6 (pp) Q91VD9" source="12221" target="12265" cy:directed="1"/>
      <edge id="13125" label="Q9CZU6 (pp) Q9DCD0" source="12221" target="12222" cy:directed="1"/>
      <edge id="13124" label="P35436 (pp) P35438" source="12220" target="12215" cy:directed="1"/>
      <edge id="13123" label="P23819 (pp) P16330" source="12219" target="12565" cy:directed="1"/>
      <edge id="13122" label="P23819 (pp) P38647" source="12219" target="12546" cy:directed="1"/>
      <edge id="13121" label="P23819 (pp) O08599" source="12219" target="12674" cy:directed="1"/>
      <edge id="13120" label="P23819 (pp) P99024" source="12219" target="12567" cy:directed="1"/>
      <edge id="13119" label="P23819 (pp) P68369" source="12219" target="12348" cy:directed="1"/>
      <edge id="13118" label="P23819 (pp) P35436" source="12219" target="12220" cy:directed="1"/>
      <edge id="13117" label="Q06335 (pp) Q03157" source="12218" target="12757" cy:directed="1"/>
      <edge id="13116" label="Q06335 (pp) P63001" source="12218" target="12398" cy:directed="1"/>
      <edge id="13115" label="Q06335 (pp) P12023" source="12218" target="12325" cy:directed="1"/>
      <edge id="13114" label="Q06335 (pp) P04925" source="12218" target="12385" cy:directed="1"/>
      <edge id="13113" label="Q06335 (pp) P63330" source="12218" target="12229" cy:directed="1"/>
      <edge id="13112" label="Q06335 (pp) Q9QXJ1" source="12218" target="12570" cy:directed="1"/>
      <edge id="13111" label="Q9QUI0 (pp) O88643" source="12217" target="12726" cy:directed="1"/>
      <edge id="13110" label="Q9QUI0 (pp) P63001" source="12217" target="12398" cy:directed="1"/>
      <edge id="13109" label="Q9QUI0 (pp) P30999" source="12217" target="12584" cy:directed="1"/>
      <edge id="13108" label="Q9QUI0 (pp) Q99PT1" source="12217" target="12433" cy:directed="1"/>
      <edge id="13107" label="Q9QUI0 (pp) Q06335" source="12217" target="12218" cy:directed="1"/>
      <edge id="13106" label="P05202 (pp) P70404" source="12216" target="12294" cy:directed="1"/>
      <edge id="13105" label="P05202 (pp) P06151" source="12216" target="12238" cy:directed="1"/>
      <edge id="13104" label="P05202 (pp) Q8BH04" source="12216" target="12624" cy:directed="1"/>
      <edge id="13103" label="P05202 (pp) Q05920" source="12216" target="12254" cy:directed="1"/>
      <edge id="13102" label="P05202 (pp) Q60597" source="12216" target="12511" cy:directed="1"/>
      <edge id="13101" label="P05202 (pp) Q9D6R2" source="12216" target="12236" cy:directed="1"/>
      <edge id="13100" label="P05202 (pp) P54071" source="12216" target="12237" cy:directed="1"/>
      <edge id="13099" label="P35438 (pp) P11627" source="12215" target="12561" cy:directed="1"/>
      <edge id="13098" label="P35438 (pp) F6SEU4" source="12215" target="12763" cy:directed="1"/>
      <edge id="13097" label="P35438 (pp) O35526" source="12215" target="12329" cy:directed="1"/>
      <edge id="13096" label="P35438 (pp) P12367" source="12215" target="12417" cy:directed="1"/>
      <edge id="13095" label="P35438 (pp) P63017" source="12215" target="12420" cy:directed="1"/>
      <edge id="13094" label="P35438 (pp) A2CG49" source="12215" target="12792" cy:directed="1"/>
      <edge id="13093" label="P35438 (pp) O88737" source="12215" target="12495" cy:directed="1"/>
      <edge id="13092" label="P35438 (pp) Q6URW6" source="12215" target="12787" cy:directed="1"/>
      <edge id="13091" label="P35438 (pp) Q8BMF4" source="12215" target="12253" cy:directed="1"/>
      <edge id="13090" label="P35438 (pp) P57780" source="12215" target="12734" cy:directed="1"/>
      <edge id="13089" label="P35438 (pp) O55100" source="12215" target="12682" cy:directed="1"/>
      <edge id="13088" label="P35438 (pp) P62259" source="12215" target="12225" cy:directed="1"/>
      <edge id="13087" label="P35438 (pp) P68368" source="12215" target="12532" cy:directed="1"/>
      <edge id="13086" label="P35438 (pp) P06837" source="12215" target="12507" cy:directed="1"/>
      <edge id="13085" label="P35438 (pp) P68033" source="12215" target="12571" cy:directed="1"/>
      <edge id="13084" label="P35438 (pp) Q60631" source="12215" target="12353" cy:directed="1"/>
      <edge id="13083" label="P35438 (pp) Q6PIC6" source="12215" target="12633" cy:directed="1"/>
      <edge id="13082" label="P35438 (pp) P28652" source="12215" target="12576" cy:directed="1"/>
      <edge id="13081" label="P12382 (pp) P17751" source="12214" target="12297" cy:directed="1"/>
      <edge id="13080" label="P12382 (pp) P47857" source="12214" target="12531" cy:directed="1"/>
      <edge id="13079" label="P12382 (pp) P52480" source="12214" target="12455" cy:directed="1"/>
      <edge id="13078" label="P12382 (pp) P06745" source="12214" target="12464" cy:directed="1"/>
      <edge id="13077" label="P12382 (pp) P63101" source="12214" target="12479" cy:directed="1"/>
      <edge id="13076" label="P12382 (pp) Q93092" source="12214" target="12454" cy:directed="1"/>
      <edge id="13075" label="P12382 (pp) P05064" source="12214" target="12321" cy:directed="1"/>
      <edge id="13074" label="P12382 (pp) P05063" source="12214" target="12512" cy:directed="1"/>
      <edge id="13073" label="P12382 (pp) P17710" source="12214" target="12322" cy:directed="1"/>
      <edge id="13072" label="P12382 (pp) P35438" source="12214" target="12215" cy:directed="1"/>
      <edge id="13071" label="P68510 (pp) P62259" source="12213" target="12225" cy:directed="1"/>
      <edge id="13070" label="P68510 (pp) Q9DCJ5" source="12213" target="12380" cy:directed="1"/>
      <edge id="13069" label="P68510 (pp) Q9CQW1" source="12213" target="12770" cy:directed="1"/>
      <edge id="13068" label="P68510 (pp) P56480" source="12213" target="12258" cy:directed="1"/>
      <edge id="13067" label="P68510 (pp) Q9D051" source="12213" target="12209" cy:directed="1"/>
      <edge id="13066" label="P68510 (pp) P11499" source="12213" target="12320" cy:directed="1"/>
      <edge id="13065" label="P68510 (pp) Q9WV55" source="12213" target="12723" cy:directed="1"/>
      <edge id="13064" label="P68510 (pp) Q9DCW4" source="12213" target="12280" cy:directed="1"/>
      <edge id="13063" label="P68510 (pp) Q60930" source="12213" target="12677" cy:directed="1"/>
      <edge id="13062" label="P68510 (pp) P46460" source="12213" target="12283" cy:directed="1"/>
      <edge id="13061" label="P68510 (pp) P42208" source="12213" target="12707" cy:directed="1"/>
      <edge id="13060" label="P68510 (pp) Q9ERS2" source="12213" target="12339" cy:directed="1"/>
      <edge id="13059" label="P68510 (pp) P54071" source="12213" target="12237" cy:directed="1"/>
      <edge id="13058" label="P68510 (pp) Q68FD5" source="12213" target="12376" cy:directed="1"/>
      <edge id="13057" label="P68510 (pp) Q9CWS0" source="12213" target="12775" cy:directed="1"/>
      <edge id="13056" label="P68510 (pp) P12787" source="12213" target="12313" cy:directed="1"/>
      <edge id="13055" label="P68510 (pp) P50518" source="12213" target="12369" cy:directed="1"/>
      <edge id="13054" label="P68510 (pp) P48036" source="12213" target="12739" cy:directed="1"/>
      <edge id="13053" label="P68510 (pp) P63101" source="12213" target="12479" cy:directed="1"/>
      <edge id="13052" label="P68510 (pp) Q9R0Q6" source="12213" target="12377" cy:directed="1"/>
      <edge id="13051" label="P68510 (pp) P61164" source="12213" target="12681" cy:directed="1"/>
      <edge id="13050" label="P68510 (pp) P10637" source="12213" target="12534" cy:directed="1"/>
      <edge id="13049" label="P68510 (pp) O55042" source="12213" target="12616" cy:directed="1"/>
      <edge id="13048" label="P68510 (pp) P67871" source="12213" target="12662" cy:directed="1"/>
      <edge id="13047" label="P68510 (pp) Q61553" source="12213" target="12660" cy:directed="1"/>
      <edge id="13046" label="P68510 (pp) P08249" source="12213" target="12235" cy:directed="1"/>
      <edge id="13045" label="P68510 (pp) Q8VBV7" source="12213" target="12653" cy:directed="1"/>
      <edge id="13044" label="P68510 (pp) Q91VZ6" source="12213" target="12638" cy:directed="1"/>
      <edge id="13043" label="P68510 (pp) Q9CQ92" source="12213" target="12449" cy:directed="1"/>
      <edge id="13042" label="P68510 (pp) Q9D8B3" source="12213" target="12618" cy:directed="1"/>
      <edge id="13041" label="P68510 (pp) P68368" source="12213" target="12532" cy:directed="1"/>
      <edge id="13040" label="P68510 (pp) Q99PT1" source="12213" target="12433" cy:directed="1"/>
      <edge id="13039" label="P68510 (pp) P17751" source="12213" target="12297" cy:directed="1"/>
      <edge id="13038" label="P68510 (pp) P05202" source="12213" target="12216" cy:directed="1"/>
      <edge id="13037" label="Q03265 (pp) P43024" source="12212" target="12472" cy:directed="1"/>
      <edge id="13036" label="Q03265 (pp) Q9CQH3" source="12212" target="12240" cy:directed="1"/>
      <edge id="13035" label="Q03265 (pp) Q9D6J6" source="12212" target="12207" cy:directed="1"/>
      <edge id="13034" label="Q03265 (pp) O35143" source="12212" target="12703" cy:directed="1"/>
      <edge id="13033" label="Q03265 (pp) Q9CQQ7" source="12212" target="12409" cy:directed="1"/>
      <edge id="13032" label="Q03265 (pp) P03930" source="12212" target="12388" cy:directed="1"/>
      <edge id="13031" label="Q03265 (pp) P19536" source="12212" target="12373" cy:directed="1"/>
      <edge id="13030" label="Q03265 (pp) P48962" source="12212" target="12698" cy:directed="1"/>
      <edge id="13029" label="Q03265 (pp) Q9D3D9" source="12212" target="12210" cy:directed="1"/>
      <edge id="13028" label="Q03265 (pp) Q9D2G2" source="12212" target="12287" cy:directed="1"/>
      <edge id="13027" label="Q03265 (pp) Q8VEM8" source="12212" target="12349" cy:directed="1"/>
      <edge id="13026" label="Q03265 (pp) Q60931" source="12212" target="12556" cy:directed="1"/>
      <edge id="13025" label="Q03265 (pp) P63038" source="12212" target="12247" cy:directed="1"/>
      <edge id="13024" label="Q03265 (pp) Q9DB77" source="12212" target="12405" cy:directed="1"/>
      <edge id="13023" label="Q03265 (pp) Q06185" source="12212" target="12271" cy:directed="1"/>
      <edge id="13022" label="Q03265 (pp) Q9WUM5" source="12212" target="12276" cy:directed="1"/>
      <edge id="13021" label="Q03265 (pp) Q91YT0" source="12212" target="12379" cy:directed="1"/>
      <edge id="13020" label="Q03265 (pp) Q91VR2" source="12212" target="12263" cy:directed="1"/>
      <edge id="13019" label="Q03265 (pp) Q9R0Y5" source="12212" target="12572" cy:directed="1"/>
      <edge id="13018" label="Q03265 (pp) Q99LC5" source="12212" target="12315" cy:directed="1"/>
      <edge id="13017" label="Q03265 (pp) Q8K3J1" source="12212" target="12404" cy:directed="1"/>
      <edge id="13016" label="Q03265 (pp) P09411" source="12212" target="12298" cy:directed="1"/>
      <edge id="13015" label="Q03265 (pp) P16054" source="12212" target="12443" cy:directed="1"/>
      <edge id="13014" label="Q03265 (pp) P97807" source="12212" target="12340" cy:directed="1"/>
      <edge id="13013" label="Q03265 (pp) Q9CZ13" source="12212" target="12249" cy:directed="1"/>
      <edge id="13012" label="Q03265 (pp) Q91VD9" source="12212" target="12265" cy:directed="1"/>
      <edge id="13011" label="Q03265 (pp) Q9DCX2" source="12212" target="12366" cy:directed="1"/>
      <edge id="13010" label="Q03265 (pp) Q9CR68" source="12212" target="12267" cy:directed="1"/>
      <edge id="13009" label="Q03265 (pp) Q9DC69" source="12212" target="12407" cy:directed="1"/>
      <edge id="13008" label="Q03265 (pp) Q91VM9" source="12212" target="12406" cy:directed="1"/>
      <edge id="13007" label="Q03265 (pp) P68510" source="12212" target="12213" cy:directed="1"/>
      <edge id="13006" label="O09111 (pp) Q9D6J6" source="12211" target="12207" cy:directed="1"/>
      <edge id="13005" label="O09111 (pp) Q9CQH3" source="12211" target="12240" cy:directed="1"/>
      <edge id="13004" label="Q9D3D9 (pp) Q9D6J6" source="12210" target="12207" cy:directed="1"/>
      <edge id="13003" label="Q9D3D9 (pp) Q99LY9" source="12210" target="12252" cy:directed="1"/>
      <edge id="13002" label="Q9D3D9 (pp) Q91VR2" source="12210" target="12263" cy:directed="1"/>
      <edge id="13001" label="Q9D3D9 (pp) Q9CQH3" source="12210" target="12240" cy:directed="1"/>
      <edge id="13000" label="Q9D3D9 (pp) Q9ERS2" source="12210" target="12339" cy:directed="1"/>
      <edge id="12999" label="Q9D3D9 (pp) O09111" source="12210" target="12211" cy:directed="1"/>
      <edge id="12998" label="Q9D051 (pp) P06745" source="12209" target="12464" cy:directed="1"/>
      <edge id="12997" label="Q9D051 (pp) Q93092" source="12209" target="12454" cy:directed="1"/>
      <edge id="12996" label="Q9D051 (pp) P35486" source="12209" target="12439" cy:directed="1"/>
      <edge id="12995" label="Q9D051 (pp) Q99LC5" source="12209" target="12315" cy:directed="1"/>
      <edge id="12994" label="Q9D051 (pp) Q9DCJ5" source="12209" target="12380" cy:directed="1"/>
      <edge id="12993" label="Q9D051 (pp) Q05920" source="12209" target="12254" cy:directed="1"/>
      <edge id="12992" label="Q9D051 (pp) Q9CR68" source="12209" target="12267" cy:directed="1"/>
      <edge id="12991" label="Q9D051 (pp) Q9D2G2" source="12209" target="12287" cy:directed="1"/>
      <edge id="12990" label="Q9D051 (pp) Q9D0M3" source="12209" target="12250" cy:directed="1"/>
      <edge id="12989" label="Q9D051 (pp) Q9CQH3" source="12209" target="12240" cy:directed="1"/>
      <edge id="12988" label="Q9D051 (pp) P97807" source="12209" target="12340" cy:directed="1"/>
      <edge id="12987" label="Q9D051 (pp) Q8BMF3" source="12209" target="12544" cy:directed="1"/>
      <edge id="12986" label="Q9D051 (pp) P97450" source="12209" target="12430" cy:directed="1"/>
      <edge id="12985" label="Q9D051 (pp) P06151" source="12209" target="12238" cy:directed="1"/>
      <edge id="12984" label="Q9D051 (pp) P16054" source="12209" target="12443" cy:directed="1"/>
      <edge id="12983" label="Q9D051 (pp) P40142" source="12209" target="12359" cy:directed="1"/>
      <edge id="12982" label="Q9D051 (pp) Q9D6R2" source="12209" target="12236" cy:directed="1"/>
      <edge id="12981" label="Q9D051 (pp) P52480" source="12209" target="12455" cy:directed="1"/>
      <edge id="12980" label="Q9D051 (pp) Q9CQQ7" source="12209" target="12409" cy:directed="1"/>
      <edge id="12979" label="Q9D051 (pp) P63101" source="12209" target="12479" cy:directed="1"/>
      <edge id="12978" label="Q9D051 (pp) Q9DB77" source="12209" target="12405" cy:directed="1"/>
      <edge id="12977" label="Q9D051 (pp) Q8BMF4" source="12209" target="12253" cy:directed="1"/>
      <edge id="12976" label="Q9D051 (pp) Q91VD9" source="12209" target="12265" cy:directed="1"/>
      <edge id="12975" label="Q9D051 (pp) Q03265" source="12209" target="12212" cy:directed="1"/>
      <edge id="12974" label="O08749 (pp) P56480" source="12208" target="12258" cy:directed="1"/>
      <edge id="12973" label="O08749 (pp) Q9DC69" source="12208" target="12407" cy:directed="1"/>
      <edge id="12972" label="O08749 (pp) Q91ZJ5" source="12208" target="12614" cy:directed="1"/>
      <edge id="12971" label="O08749 (pp) P35486" source="12208" target="12439" cy:directed="1"/>
      <edge id="12970" label="O08749 (pp) Q9D6R2" source="12208" target="12236" cy:directed="1"/>
      <edge id="12969" label="O08749 (pp) Q9D2G2" source="12208" target="12287" cy:directed="1"/>
      <edge id="12968" label="O08749 (pp) P08249" source="12208" target="12235" cy:directed="1"/>
      <edge id="12967" label="O08749 (pp) Q9DB77" source="12208" target="12405" cy:directed="1"/>
      <edge id="12966" label="O08749 (pp) P52480" source="12208" target="12455" cy:directed="1"/>
      <edge id="12965" label="O08749 (pp) Q9CQA3" source="12208" target="12312" cy:directed="1"/>
      <edge id="12964" label="O08749 (pp) Q9CZU6" source="12208" target="12221" cy:directed="1"/>
      <edge id="12963" label="O08749 (pp) Q8K2B3" source="12208" target="12347" cy:directed="1"/>
      <edge id="12962" label="O08749 (pp) Q91VR2" source="12208" target="12263" cy:directed="1"/>
      <edge id="12961" label="O08749 (pp) P09671" source="12208" target="12444" cy:directed="1"/>
      <edge id="12960" label="O08749 (pp) Q9CQH3" source="12208" target="12240" cy:directed="1"/>
      <edge id="12959" label="O08749 (pp) Q91VD9" source="12208" target="12265" cy:directed="1"/>
      <edge id="12958" label="O08749 (pp) O88441" source="12208" target="12295" cy:directed="1"/>
      <edge id="12957" label="O08749 (pp) P99029" source="12208" target="12356" cy:directed="1"/>
      <edge id="12956" label="O08749 (pp) P63038" source="12208" target="12247" cy:directed="1"/>
      <edge id="12955" label="O08749 (pp) Q8BMF4" source="12208" target="12253" cy:directed="1"/>
      <edge id="12954" label="O08749 (pp) Q8BKZ9" source="12208" target="12513" cy:directed="1"/>
      <edge id="12953" label="O08749 (pp) Q9D6J6" source="12208" target="12207" cy:directed="1"/>
      <edge id="12952" label="O08749 (pp) Q60597" source="12208" target="12511" cy:directed="1"/>
      <edge id="12951" label="O08749 (pp) Q9WUM5" source="12208" target="12276" cy:directed="1"/>
      <edge id="12950" label="O08749 (pp) Q9Z2I9" source="12208" target="12458" cy:directed="1"/>
      <edge id="12949" label="O08749 (pp) Q99KI0" source="12208" target="12338" cy:directed="1"/>
      <edge id="12948" label="O08749 (pp) Q60931" source="12208" target="12556" cy:directed="1"/>
      <edge id="12947" label="O08749 (pp) Q6PB66" source="12208" target="12498" cy:directed="1"/>
      <edge id="12946" label="O08749 (pp) Q99LC5" source="12208" target="12315" cy:directed="1"/>
      <edge id="12945" label="O08749 (pp) Q03265" source="12208" target="12212" cy:directed="1"/>
      <edge id="12944" label="O08749 (pp) Q91YT0" source="12208" target="12379" cy:directed="1"/>
      <edge id="12943" label="O08749 (pp) P97807" source="12208" target="12340" cy:directed="1"/>
      <edge id="12942" label="O08749 (pp) Q9D051" source="12208" target="12209" cy:directed="1"/>
      <edge id="12941" label="Q9D6J6 (pp) Q01097" source="12207" target="12204" cy:directed="1"/>
      <edge id="12940" label="Q9CQZ5 (pp) Q9Z1P6" source="12206" target="12299" cy:directed="1"/>
      <edge id="12939" label="Q9CQZ5 (pp) Q9DB77" source="12206" target="12405" cy:directed="1"/>
      <edge id="12938" label="Q9CQZ5 (pp) Q9CQH3" source="12206" target="12240" cy:directed="1"/>
      <edge id="12937" label="Q9CQZ5 (pp) Q99LX0" source="12206" target="12317" cy:directed="1"/>
      <edge id="12936" label="Q9CQZ5 (pp) Q9D0M3" source="12206" target="12250" cy:directed="1"/>
      <edge id="12935" label="Q9CQZ5 (pp) Q8K3J1" source="12206" target="12404" cy:directed="1"/>
      <edge id="12934" label="Q9CQZ5 (pp) Q9DCJ5" source="12206" target="12380" cy:directed="1"/>
      <edge id="12933" label="Q9CQZ5 (pp) Q9WUM5" source="12206" target="12276" cy:directed="1"/>
      <edge id="12932" label="Q9CQZ5 (pp) Q9ERS2" source="12206" target="12339" cy:directed="1"/>
      <edge id="12931" label="Q9CQZ5 (pp) Q9D3D9" source="12206" target="12210" cy:directed="1"/>
      <edge id="12930" label="Q9CQZ5 (pp) Q9CQ54" source="12206" target="12232" cy:directed="1"/>
      <edge id="12929" label="Q9CQZ5 (pp) Q9DB20" source="12206" target="12239" cy:directed="1"/>
      <edge id="12928" label="Q9CQZ5 (pp) Q9DCX2" source="12206" target="12366" cy:directed="1"/>
      <edge id="12927" label="Q9CQZ5 (pp) Q06185" source="12206" target="12271" cy:directed="1"/>
      <edge id="12926" label="Q9CQZ5 (pp) Q9DCS9" source="12206" target="12266" cy:directed="1"/>
      <edge id="12925" label="Q9CQZ5 (pp) Q9D6J5" source="12206" target="12487" cy:directed="1"/>
      <edge id="12924" label="Q9CQZ5 (pp) Q99LC3" source="12206" target="12251" cy:directed="1"/>
      <edge id="12923" label="Q9CQZ5 (pp) Q9D0S9" source="12206" target="12273" cy:directed="1"/>
      <edge id="12922" label="Q9CQZ5 (pp) Q9DC69" source="12206" target="12407" cy:directed="1"/>
      <edge id="12921" label="Q9CQZ5 (pp) Q9CZ13" source="12206" target="12249" cy:directed="1"/>
      <edge id="12920" label="Q9CQZ5 (pp) Q9CR68" source="12206" target="12267" cy:directed="1"/>
      <edge id="12919" label="Q9CQZ5 (pp) Q62425" source="12206" target="12545" cy:directed="1"/>
      <edge id="12918" label="Q9CQZ5 (pp) Q9CQQ7" source="12206" target="12409" cy:directed="1"/>
      <edge id="12917" label="Q9CQZ5 (pp) Q3UIU2" source="12206" target="12288" cy:directed="1"/>
      <edge id="12916" label="Q9CQZ5 (pp) Q9CQC7" source="12206" target="12494" cy:directed="1"/>
      <edge id="12915" label="Q9CQZ5 (pp) Q9CPQ8" source="12206" target="12264" cy:directed="1"/>
      <edge id="12914" label="Q9CQZ5 (pp) P99029" source="12206" target="12356" cy:directed="1"/>
      <edge id="12913" label="Q9CQZ5 (pp) Q99LC5" source="12206" target="12315" cy:directed="1"/>
      <edge id="12912" label="Q9CQZ5 (pp) Q9CQ69" source="12206" target="12234" cy:directed="1"/>
      <edge id="12911" label="Q9CQZ5 (pp) Q91YT0" source="12206" target="12379" cy:directed="1"/>
      <edge id="12910" label="Q9CQZ5 (pp) P97450" source="12206" target="12430" cy:directed="1"/>
      <edge id="12909" label="Q9CQZ5 (pp) O09111" source="12206" target="12211" cy:directed="1"/>
      <edge id="12908" label="Q9CQZ5 (pp) P19536" source="12206" target="12373" cy:directed="1"/>
      <edge id="12907" label="Q9CQZ5 (pp) Q9CQZ6" source="12206" target="12231" cy:directed="1"/>
      <edge id="12906" label="Q9CQZ5 (pp) Q9CPP6" source="12206" target="12281" cy:directed="1"/>
      <edge id="12905" label="Q9CQZ5 (pp) Q91VD9" source="12206" target="12265" cy:directed="1"/>
      <edge id="12904" label="Q9CQZ5 (pp) Q91VR2" source="12206" target="12263" cy:directed="1"/>
      <edge id="12903" label="Q9CQZ5 (pp) P48771" source="12206" target="12303" cy:directed="1"/>
      <edge id="12902" label="Q9CQZ5 (pp) Q9D6J6" source="12206" target="12207" cy:directed="1"/>
      <edge id="12901" label="Q80Z38 (pp) P35438" source="12205" target="12215" cy:directed="1"/>
      <edge id="12900" label="Q80Z38 (pp) Q8BYM5" source="12205" target="12592" cy:directed="1"/>
      <edge id="12899" label="Q01097 (pp) P12382" source="12204" target="12214" cy:directed="1"/>
      <edge id="12898" label="Q01097 (pp) A2CG49" source="12204" target="12792" cy:directed="1"/>
      <edge id="12897" label="Q01097 (pp) P15116" source="12204" target="12506" cy:directed="1"/>
      <edge id="12896" label="Q01097 (pp) P57780" source="12204" target="12734" cy:directed="1"/>
      <edge id="12895" label="Q01097 (pp) P31324" source="12204" target="12499" cy:directed="1"/>
      <edge id="12894" label="Q01097 (pp) Q61879" source="12204" target="12478" cy:directed="1"/>
      <edge id="12893" label="Q01097 (pp) P68181" source="12204" target="12631" cy:directed="1"/>
      <edge id="12892" label="Q01097 (pp) O35129" source="12204" target="12411" cy:directed="1"/>
      <edge id="12891" label="Q01097 (pp) P35436" source="12204" target="12220" cy:directed="1"/>
      <edge id="12890" label="Q01097 (pp) P53994" source="12204" target="12793" cy:directed="1"/>
      <edge id="12889" label="Q01097 (pp) P46660" source="12204" target="12401" cy:directed="1"/>
      <edge id="12888" label="Q01097 (pp) P63330" source="12204" target="12229" cy:directed="1"/>
      <edge id="12887" label="Q01097 (pp) P39053" source="12204" target="12497" cy:directed="1"/>
      <edge id="12886" label="Q01097 (pp) Q9QXS6" source="12204" target="12539" cy:directed="1"/>
      <edge id="12885" label="Q01097 (pp) D3YVF0" source="12204" target="12790" cy:directed="1"/>
      <edge id="12884" label="Q01097 (pp) P30999" source="12204" target="12584" cy:directed="1"/>
      <edge id="12883" label="Q01097 (pp) P35438" source="12204" target="12215" cy:directed="1"/>
      <edge id="12882" label="Q01097 (pp) P62874" source="12204" target="12361" cy:directed="1"/>
      <edge id="12881" label="Q01097 (pp) P05202" source="12204" target="12216" cy:directed="1"/>
      <edge id="12880" label="Q01097 (pp) P13020" source="12204" target="12777" cy:directed="1"/>
      <edge id="12879" label="Q01097 (pp) P11627" source="12204" target="12561" cy:directed="1"/>
      <edge id="12878" label="Q01097 (pp) P08551" source="12204" target="12715" cy:directed="1"/>
      <edge id="12877" label="Q01097 (pp) Q9CVB6" source="12204" target="12493" cy:directed="1"/>
      <edge id="12876" label="Q01097 (pp) P43006" source="12204" target="12773" cy:directed="1"/>
      <edge id="12875" label="Q01097 (pp) P06837" source="12204" target="12507" cy:directed="1"/>
      <edge id="12874" label="Q01097 (pp) O88737" source="12204" target="12495" cy:directed="1"/>
      <edge id="12873" label="Q01097 (pp) P17751" source="12204" target="12297" cy:directed="1"/>
      <edge id="12872" label="Q01097 (pp) Q8BH59" source="12204" target="12765" cy:directed="1"/>
      <edge id="12871" label="Q01097 (pp) P63011" source="12204" target="12547" cy:directed="1"/>
      <edge id="12870" label="Q01097 (pp) F6SEU4" source="12204" target="12763" cy:directed="1"/>
      <edge id="12869" label="Q01097 (pp) P59999" source="12204" target="12492" cy:directed="1"/>
      <edge id="12868" label="Q01097 (pp) P63001" source="12204" target="12398" cy:directed="1"/>
      <edge id="12867" label="Q01097 (pp) P63328" source="12204" target="12615" cy:directed="1"/>
      <edge id="12866" label="Q01097 (pp) P46096" source="12204" target="12690" cy:directed="1"/>
      <edge id="12865" label="Q01097 (pp) Q9JM76" source="12204" target="12378" cy:directed="1"/>
      <edge id="12864" label="Q01097 (pp) Q923T9" source="12204" target="12462" cy:directed="1"/>
      <edge id="12863" label="Q01097 (pp) O08599" source="12204" target="12674" cy:directed="1"/>
      <edge id="12862" label="Q01097 (pp) P48962" source="12204" target="12698" cy:directed="1"/>
      <edge id="12861" label="Q01097 (pp) P62259" source="12204" target="12225" cy:directed="1"/>
      <edge id="12860" label="Q01097 (pp) Q61411" source="12204" target="12640" cy:directed="1"/>
      <edge id="12859" label="Q01097 (pp) P62204" source="12204" target="12579" cy:directed="1"/>
      <edge id="12858" label="Q01097 (pp) P08553" source="12204" target="12717" cy:directed="1"/>
      <edge id="12857" label="Q01097 (pp) P60710" source="12204" target="12342" cy:directed="1"/>
      <edge id="12856" label="Q01097 (pp) P61982" source="12204" target="12509" cy:directed="1"/>
      <edge id="12855" label="Q01097 (pp) P63321" source="12204" target="12701" cy:directed="1"/>
      <edge id="12854" label="Q01097 (pp) P35279" source="12204" target="12651" cy:directed="1"/>
      <edge id="12853" label="Q01097 (pp) Q91VR2" source="12204" target="12263" cy:directed="1"/>
      <edge id="12852" label="Q01097 (pp) O55100" source="12204" target="12682" cy:directed="1"/>
      <edge id="12851" label="Q01097 (pp) P68404" source="12204" target="12260" cy:directed="1"/>
      <edge id="12850" label="Q01097 (pp) P97772" source="12204" target="12501" cy:directed="1"/>
      <edge id="12849" label="Q01097 (pp) P63318" source="12204" target="12666" cy:directed="1"/>
      <edge id="12848" label="Q01097 (pp) P50516" source="12204" target="12293" cy:directed="1"/>
      <edge id="12847" label="Q01097 (pp) P05480" source="12204" target="12344" cy:directed="1"/>
      <edge id="12846" label="Q01097 (pp) O88952" source="12204" target="12244" cy:directed="1"/>
      <edge id="12845" label="Q01097 (pp) P60879" source="12204" target="12381" cy:directed="1"/>
      <edge id="12844" label="Q01097 (pp) P06151" source="12204" target="12238" cy:directed="1"/>
      <edge id="12843" label="Q01097 (pp) P16858" source="12204" target="12559" cy:directed="1"/>
      <edge id="12842" label="Q01097 (pp) P51863" source="12204" target="12223" cy:directed="1"/>
      <edge id="12841" label="Q01097 (pp) P16054" source="12204" target="12443" cy:directed="1"/>
      <edge id="12840" label="Q01097 (pp) P31938" source="12204" target="12289" cy:directed="1"/>
      <edge id="12839" label="Q01097 (pp) P20357" source="12204" target="12620" cy:directed="1"/>
      <edge id="12838" label="Q01097 (pp) P05063" source="12204" target="12512" cy:directed="1"/>
      <edge id="12837" label="Q01097 (pp) P47757" source="12204" target="12226" cy:directed="1"/>
      <edge id="12836" label="Q01097 (pp) P68369" source="12204" target="12348" cy:directed="1"/>
      <edge id="12835" label="Q01097 (pp) P68033" source="12204" target="12571" cy:directed="1"/>
      <edge id="12834" label="Q01097 (pp) P17426" source="12204" target="12291" cy:directed="1"/>
      <edge id="12833" label="Q01097 (pp) P63101" source="12204" target="12479" cy:directed="1"/>
      <edge id="12832" label="Q01097 (pp) Q9D6M3" source="12204" target="12530" cy:directed="1"/>
      <edge id="12831" label="Q01097 (pp) Q6PHZ2" source="12204" target="12341" cy:directed="1"/>
      <edge id="12830" label="Q01097 (pp) P62835" source="12204" target="12525" cy:directed="1"/>
      <edge id="12829" label="Q01097 (pp) Q03265" source="12204" target="12212" cy:directed="1"/>
      <edge id="12828" label="Q01097 (pp) P47754" source="12204" target="12437" cy:directed="1"/>
      <edge id="12827" label="Q01097 (pp) P63085" source="12204" target="12255" cy:directed="1"/>
      <edge id="12826" label="Q01097 (pp) P12367" source="12204" target="12417" cy:directed="1"/>
      <edge id="12825" label="Q01097 (pp) Q60676" source="12204" target="12395" cy:directed="1"/>
      <edge id="12824" label="Q01097 (pp) P68510" source="12204" target="12213" cy:directed="1"/>
      <edge id="12823" label="Q01097 (pp) P51881" source="12204" target="12345" cy:directed="1"/>
      <edge id="12822" label="Q01097 (pp) O35526" source="12204" target="12329" cy:directed="1"/>
      <edge id="12821" label="Q01097 (pp) P15105" source="12204" target="12282" cy:directed="1"/>
      <edge id="12820" label="Q01097 (pp) P05132" source="12204" target="12269" cy:directed="1"/>
      <edge id="12819" label="Q01097 (pp) Q80Z38" source="12204" target="12205" cy:directed="1"/>
    </graph>
  </att>
</graph>
