# Supplementary material for: APP Is a Context-Sensitive Regulator of the Hippocampal Presynaptic Active Zone
Source: PLOS journal article supplement (doi:10.1371/journal.pcbi.1004832), 2016-04-19
Supplement: S6 (10.1371/journal.pcbi.1004832.s006) [file journal.pcbi.1004832.s006.cys › CytoscapeSession-2016_01_22-10_07/properties/session_bookmarks.xml]

<?xml version="1.0" encoding="UTF-8" standalone="yes"?>
<bookmarks xmlns:ns2="http://www.w3.org/1999/xlink" version="0.5">
    <description>
		Bookmark file for Cytoscape 2.4 and later.
	</description>
    <category name="ontology">
        <dataSource ns2:href="http://purl.obolibrary.org/obo/go.obo" name="Gene Ontology" format="obo">
            <attribute name="description">
				The Gene Ontology (GO) project provides a controlled vocabulary to describe gene and gene product attributes in any organism. This data source contains full size GO dag, which contains all GO terms.  This OBO file is written in version 1.2 format.
			</attribute>
            <attribute name="ontologyType">GO</attribute>
        </dataSource>
        <dataSource ns2:href="http://geneontology.org/ontology/subsets/goslim_generic.obo" name="Generic GO slim" format="obo">
            <attribute name="description">
				Subset of general GO Terms.
			</attribute>
            <attribute name="ontologyType">GO</attribute>
        </dataSource>
        <dataSource ns2:href="http://geneontology.org/ontology/subsets/goslim_yeast.obo" name="Yeast GO slim" format="obo">
            <attribute name="description">
				Subset of GO Terms for annotating Yeast data sets.  Maintained by SGD.
			</attribute>
            <attribute name="ontologyType">GO</attribute>
        </dataSource>
        <dataSource ns2:href="http://obo.cvs.sourceforge.net/*checkout*/obo/obo/ontology/genomic-proteomic/protein/psi-mi.obo" name="Protein-protein interaction" format="obo">
            <attribute name="description">
				A structured controlled vocabulary for the annotation of experiments concerned with protein-protein interactions.
			</attribute>
        </dataSource>
        <dataSource ns2:href="http://obo.cvs.sourceforge.net/*checkout*/obo/obo/ontology/genomic-proteomic/pathway.obo" name="Pathway Ontology" format="obo">
            <attribute name="description">
				The Pathway Ontology is a controlled vocabulary for pathways that provides standard terms for the annotation of geneproducts.
			</attribute>
        </dataSource>
        <category name="annotation">
            <dataSource ns2:href="http://geneontology.org/gene-associations/gene_association.sgd.gz" name="Gene Association file for Saccharomyces cerevisiae" format="Gene Association">
                <attribute name="curator">SGD</attribute>
                <attribute name="species">
					Saccharomyces cerevisiae
				</attribute>
            </dataSource>
            <dataSource ns2:href="http://geneontology.org/gene-associations/gene_association.fb.gz" name="Gene Association file for Drosophila melanogaster" format="Gene Association">
                <attribute name="curator">FlyBase</attribute>
                <attribute name="species">
					Drosophila melanogaster
				</attribute>
            </dataSource>
            <dataSource ns2:href="http://geneontology.org/gene-associations/gene_association.mgi.gz" name="Gene Association file for Mus musculus" format="Gene Association">
                <attribute name="curator">MGI</attribute>
                <attribute name="species">Mus musculus</attribute>
            </dataSource>
            <dataSource ns2:href="http://geneontology.org/gene-associations/gene_association.tair.gz" name="Gene Association file for Arabidopsis thaliana" format="Gene Association">
                <attribute name="curator">TAIR/TIGR</attribute>
                <attribute name="species">
					Arabidopsis thaliana
				</attribute>
            </dataSource>
            <dataSource ns2:href="http://geneontology.org/gene-associations/gene_association.wb.gz" name="Gene Association file for Caenorhabditis elegans" format="Gene Association">
                <attribute name="curator">WormBase</attribute>
                <attribute name="species">
					Caenorhabditis elegans
				</attribute>
            </dataSource>
            <dataSource ns2:href="http://geneontology.org/gene-associations/gene_association.rgd.gz" name="Gene Association file for Rattus norvegicus" format="Gene Association">
                <attribute name="curator">RGD</attribute>
                <attribute name="species">Rattus norvegicus</attribute>
            </dataSource>
            <dataSource ns2:href="http://geneontology.org/gene-associations/gene_association.gramene_oryza.gz" name="Gene Association file for Oryza sativa" format="Gene Association">
                <attribute name="curator">Gramene</attribute>
                <attribute name="species">Oryza sativa</attribute>
            </dataSource>
            <dataSource ns2:href="http://geneontology.org/gene-associations/gene_association.zfin.gz" name="Gene Association file for Danio rerio" format="Gene Association">
                <attribute name="curator">ZFIN</attribute>
                <attribute name="species">Danio rerio</attribute>
            </dataSource>
            <dataSource ns2:href="http://geneontology.org/gene-associations/gene_association.ddb.gz" name="Gene Association file for Dictyostelium discoideum" format="Gene Association">
                <attribute name="curator">DictyBase</attribute>
                <attribute name="species">
					Dictyostelium discoideum
				</attribute>
            </dataSource>
            <dataSource ns2:href="http://geneontology.org/gene-associations/gene_association.cgd.gz" name="Gene Association file for Candida albicans" format="Gene Association">
                <attribute name="curator">CGD</attribute>
                <attribute name="species">Candida albicans</attribute>
            </dataSource>
            <dataSource ns2:href="http://geneontology.org/gene-associations/gene_association.pseudocap.gz" name="Gene Association file for Pseudomonas aeruginosa PAO1" format="Gene Association">
                <attribute name="curator">PseudoCAP</attribute>
                <attribute name="species">
					Pseudomonas aeruginosa PAO1
				</attribute>
            </dataSource>
            <dataSource ns2:href="http://geneontology.org/gene-associations/gene_association.tigr_Banthracis.gz" name="Gene Association file for Bacillus anthracis Ames" format="Gene Association">
                <attribute name="curator">TIGR</attribute>
                <attribute name="species">
					Bacillus anthracis Ames
				</attribute>
            </dataSource>
            <dataSource ns2:href="http://geneontology.org/gene-associations/gene_association.tigr_Cburnetii.gz" name="Gene Association file for Coxiella burnetii RSA 493" format="Gene Association">
                <attribute name="curator">TIGR</attribute>
                <attribute name="species">
					Coxiella burnetii RSA 493
				</attribute>
            </dataSource>
            <dataSource ns2:href="http://geneontology.org/gene-associations/gene_association.tigr_Cjejuni.gz" name="Gene Association file for Campylobacter jejuni RM1221" format="Gene Association">
                <attribute name="curator">TIGR</attribute>
                <attribute name="species">
					Campylobacter jejuni RM1221
				</attribute>
            </dataSource>
            <dataSource ns2:href="http://geneontology.org/gene-associations/gene_association.tigr_Dethenogenes.gz" name="Gene Association file for Dehalococcoides ethenogenes 195" format="Gene Association">
                <attribute name="curator">TIGR</attribute>
                <attribute name="species">
					Dehalococcoides ethenogenes 195
				</attribute>
            </dataSource>
            <dataSource ns2:href="http://geneontology.org/gene-associations/gene_association.tigr_Gsulfurreducens.gz" name="Gene Association file for Geobacter sulfurreducens PCA" format="Gene Association">
                <attribute name="curator">TIGR</attribute>
                <attribute name="species">
					Geobacter sulfurreducens PCA
				</attribute>
            </dataSource>
            <dataSource ns2:href="http://geneontology.org/gene-associations/gene_association.tigr_Lmonocytogenes.gz" name="Gene Association file for Listeria monocytogenes 4b F2365" format="Gene Association">
                <attribute name="curator">TIGR</attribute>
                <attribute name="species">
					Listeria monocytogenes 4b F2365
				</attribute>
            </dataSource>
            <dataSource ns2:href="http://geneontology.org/gene-associations/gene_association.tigr_Mcapsulatus.gz" name="Gene Association file for Methylococcus capsulatus Bath" format="Gene Association">
                <attribute name="curator">TIGR</attribute>
                <attribute name="species">
					Methylococcus capsulatus Bath
				</attribute>
            </dataSource>
            <dataSource ns2:href="http://geneontology.org/gene-associations/gene_association.tigr_Psyringae.gz" name="Gene Association file for Pseudomonas syringae DC3000" format="Gene Association">
                <attribute name="curator">TIGR</attribute>
                <attribute name="species">
					Pseudomonas syringae DC3000
				</attribute>
            </dataSource>
            <dataSource ns2:href="http://geneontology.org/gene-associations/gene_association.tigr_Soneidensis.gz" name="Gene Association file for Shewanella oneidensis MR-1" format="Gene Association">
                <attribute name="curator">TIGR</attribute>
                <attribute name="species">
					Shewanella oneidensis MR-1
				</attribute>
            </dataSource>
            <dataSource ns2:href="http://geneontology.org/gene-associations/gene_association.tigr_Spomeroyi.gz" name="Gene Association file for Silicibacter pomeroyi DSS-3" format="Gene Association">
                <attribute name="curator">TIGR</attribute>
                <attribute name="species">
					Silicibacter pomeroyi DSS-3
				</attribute>
            </dataSource>
            <dataSource ns2:href="http://geneontology.org/gene-associations/gene_association.tigr_Tbrucei_chr2.gz" name="Gene Association file for Trypanosoma brucei chr 2" format="Gene Association">
                <attribute name="curator">TIGR</attribute>
                <attribute name="species">
					Trypanosoma brucei chr 2
				</attribute>
            </dataSource>
            <dataSource ns2:href="http://geneontology.org/gene-associations/gene_association.tigr_Vcholerae.gz" name="Gene Association file for Vibrio cholerae" format="Gene Association">
                <attribute name="curator">TIGR</attribute>
                <attribute name="species">Vibrio cholerae</attribute>
            </dataSource>
            <dataSource ns2:href="http://geneontology.org/gene-associations/gene_association.goa_chicken.gz" name="Gene Association file for Gallus gallus" format="Gene Association">
                <attribute name="curator">
					GO Annotations @ EBI
				</attribute>
                <attribute name="species">Gallus gallus</attribute>
            </dataSource>
            <dataSource ns2:href="http://geneontology.org/gene-associations/gene_association.goa_cow.gz" name="Gene Association file for Bos taurus" format="Gene Association">
                <attribute name="curator">
					GO Annotations @ EBI
				</attribute>
                <attribute name="species">Bos taurus</attribute>
            </dataSource>
            <dataSource ns2:href="http://geneontology.org/gene-associations/gene_association.goa_human.gz" name="Gene Association file for Homo sapiens" format="Gene Association">
                <attribute name="curator">
					GO Annotations @ EBI
				</attribute>
                <attribute name="species">Homo sapiens</attribute>
            </dataSource>
            <dataSource ns2:href="http://geneontology.org/gene-associations/gene_association.goa_pdb.gz" name="Gene Association file for PDB" format="Gene Association">
                <attribute name="curator">
					GO Annotations @ EBI
				</attribute>
                <attribute name="species">PDB</attribute>
            </dataSource>
            <dataSource ns2:href="http://geneontology.org/gene-associations/gene_association.goa_uniprot.gz" name="Gene Association file for UniProt" format="Gene Association">
                <attribute name="curator">
					GO Annotations @ EBI
				</attribute>
                <attribute name="species">UniProt</attribute>
            </dataSource>
            <dataSource ns2:href="http://geneontology.org/gene-associations/gene_association.GeneDB_Lmajor.gz" name="Gene Association file for Leishmania major" format="Gene Association">
                <attribute name="curator">Sanger GeneDB</attribute>
                <attribute name="species">Leishmania major</attribute>
            </dataSource>
            <dataSource ns2:href="http://geneontology.org/gene-associations/gene_association.GeneDB_Pfalciparum.gz" name="Gene Association file for Plasmodium falciparum" format="Gene Association">
                <attribute name="curator">Sanger GeneDB</attribute>
                <attribute name="species">
					Plasmodium falciparum
				</attribute>
            </dataSource>
            <dataSource ns2:href="http://geneontology.org/gene-associations/gene_association.GeneDB_Spombe.gz" name="Gene Association file for Schizosaccharomyces pombe" format="Gene Association">
                <attribute name="curator">Sanger GeneDB</attribute>
                <attribute name="species">
					Schizosaccharomyces pombe
				</attribute>
            </dataSource>
            <dataSource ns2:href="http://geneontology.org/gene-associations/gene_association.GeneDB_Tbrucei.gz" name="Gene Association file for Trypanosoma brucei" format="Gene Association">
                <attribute name="curator">Sanger GeneDB</attribute>
                <attribute name="species">Trypanosoma brucei</attribute>
            </dataSource>
        </category>
    </category>
    <category name="network">
        <dataSource ns2:href="http://www.cytoscape.org/datasets/galFiltered.sif" name="Yeast Protein-Protein: Ideker, T. et al. (362 Interactions, galFiltered.sif)" format="sif"/>
        <dataSource ns2:href="http://cytoscape.org/datasets/rual.sif" name="Human Protein-Protein: Rual et al. Toward a proteome-scale map of the human protein-protein interaction network. Nature 2005." format="sif"/>
        <dataSource ns2:href="http://www.cytoscape.org/tut/getting.started/RUAL.subset.sif" name="Human Protein-Protein: Rual et al. (Subnetwork for tutorial)" format="sif"/>
    </category>
    <category name="table">
        <dataSource ns2:href="http://chianti.ucsd.edu/~kono/data/galFiltered.attrs" name="Sample table for galFiltered.sif network" format="attrs"/>
    </category>
    <category name="plugins">
        <dataSource ns2:href="http://chianti.ucsd.edu/cyto_web/plugins3/plugins3.xml" name="Cytoscape"/>
        <dataSource ns2:href="http://db.systemsbiology.net/cytoscape/skillcoyne/plugins.xml" name="Test"/>
    </category>
</bookmarks>
