# Supplementary material for: APP Is a Context-Sensitive Regulator of the Hippocampal Presynaptic Active Zone
Source: PLOS journal article supplement (doi:10.1371/journal.pcbi.1004832), 2016-04-19
Supplement: S6 (10.1371/journal.pcbi.1004832.s006) [file journal.pcbi.1004832.s006.cys › CytoscapeSession-2016_01_22-10_07/tables/36-Basic+Network/LOCAL_ATTRS-org.cytoscape.model.CyEdge-36+default+edge.cytable]

CyCSV-Version	1
SUID	interaction	name	selected
java.lang.Long	java.lang.String	java.lang.String	java.lang.Boolean
36 default edge
1113			false
2135			false
1111			false
2134			false
2087			false
2086			false
2085			false
2084			false
2083			false
2082			false
2081			false
2079			false
1055			false
2078			false
1054			false
2077			false
1053			false
1052			false
1050			false
1049			false
1048			false
2575			false
2574			false
2572			false
1030			false
1029			false
2565			false
2052			false
2051			false
1027			false
1026			false
2562			false
1025			false
2048			false
2047			false
2558			false
2557			false
2044			false
2040			false
2552			false
2551			false
2539			false
2537			false
2533			false
3045			false
2532			false
3044			false
3043			false
3041			false
2528			false
3040			false
3038			false
3036			false
2521			false
3033			false
2520			false
3032			false
3031			false
3030			false
2517			false
3029			false
2516			false
3028			false
2515			false
3027			false
2511			false
2510			false
2509			false
2508			false
2507			false
2506			false
2504			false
2503			false
1990			false
1989			false
2501			false
1988			false
1476			false
2500			false
1987			false
2499			false
1986			false
1474			false
1985			false
1473			false
1983			false
2495			false
1471			false
1470			false
2493			false
1980			false
2492			false
1468			false
1979			false
1977			false
1465			false
1976			false
1464			false
1975			false
1462			false
2473			false
1439			false
1438			false
925			false
1435			false
1433			false
1430			false
1429			false
1428			false
1427			false
1422			false
903			false
2942			false
2941			false
2940			false
2939			false
1912			false
1911			false
1910			false
2919			false
2918			false
2917			false
2915			false
2914			false
866			false
2912			false
2911			false
2910			false
2909			false
2908			false
2905			false
2904			false
2903			false
2900			false
852			false
2899			false
2897			false
2890			false
840			false
839			false
2885			false
2882			false
2876			false
1852			false
1851			false
2873			false
1849			false
1847			false
1846			false
2869			false
1844			false
1843			false
2865			false
1313			false
2849			false
1312			false
2848			false
2847			false
2845			false
2836			false
2835			false
781			false
780			false
2828			false
2826			false
2823			false
2822			false
1283			false
1282			false
2818			false
1280			false
2816			false
2815			false
1278			false
1277			false
762			false
732			false
722			false
1227			false
1224			false
3780			false
3778			false
1214			false
697			false
693			false
1171			false
1170			false
3727			false
1679			false
3726			false
3725			false
3724			false
3723			false
3722			false
1161			false
3720			false
1672			false
1160			false
2183			false
3719			false
1158			false
2181			false
3717			false
1157			false
2180			false
3716			false
2179			false
3715			false
1155			false
1154			false
3713			false
3712			false
1152			false
1151			false
1148			false
1147			false
1146			false
1145			false
1143			false
1142			false
1139			false
2370			false
2369			false
2368			false
831			false
2366			false
2365			false
2364			false
1590			false
1589			false
1587			false
2354			false
1585			false
1840			false
1071			false
1839			false
1838			false
1836			false
1833			false
802			false
1570			false
1569			false
1057			false
1056			false
1567			false
798			false
1566			false
1309			false
1565			false
1308			false
2075			false
795			false
2074			false
1306			false
794			false
2073			false
1305			false
1304			false
1303			false
1559			false
1302			false
1301			false
783			false
782			false
779			false
777			false
1017			false
2553			false
2039			false
2038			false
2037			false
2036			false
2548			false
2034			false
1009			false
2543			false
746			false
1000			false
2535			false
2530			false
993			false
1248			false
2527			false
1246			false
1245			false
989			false
2524			false
2523			false
2522			false
727			false
1747			false
1746			false
720			false
2768			false
3788			false
3786			false
3785			false
713			false
1992			false
3784			false
3782			false
3268			false
3779			false
2498			false
1217			false
2497			false
1216			false
1982			false
1981			false
698			false
695			false
1974			false
691			false
690			false
689			false
1953			false
920			false
1176			false
917			false
2450			false
2449			false
1167			false
1165			false
1163			false
1670			false
3695			false
3694			false
3691			false
3690			false
2922			false
3689			false
3432			false
3688			false
2920			false
3431			false
870			false
3686			false
3685			false
3684			false
3681			false
3680			false
3676			false
3675			false
2519			false
724			false
851			false
2512			false
848			false
716			false
1991			false
706			false
2496			false
1842			false
1070			false
1067			false
1192			false
807			false
1190			false
1062			false
927			false
3227			false
922			false
921			false
915			false
1040			false
1035			false
1034			false
773			false
1669			false
771			false
2559			false
1022			false
765			false
758			false
2545			false
3693			false
1004			false
1003			false
2538			false
997			false
2525			false
1244			false
