# Supplementary material for: APP Is a Context-Sensitive Regulator of the Hippocampal Presynaptic Active Zone
Source: PLOS journal article supplement (doi:10.1371/journal.pcbi.1004832), 2016-04-19
Supplement: S6 (10.1371/journal.pcbi.1004832.s006) [file journal.pcbi.1004832.s006.cys › CytoscapeSession-2016_01_22-10_07/tables/36-Basic+Network/LOCAL_ATTRS-org.cytoscape.model.CyNode-36+default+node.cytable]

CyCSV-Version	1
SUID	name	selected
java.lang.Long	java.lang.String	java.lang.Boolean
36 default node
241		false
118		false
503		false
376		false
123		false
635		false
508		false
509		false
384		false
512		false
513		false
133		false
261		false
518		false
263		false
519		false
648		false
137		false
649		false
394		false
395		false
397		false
270		false
398		false
143		false
271		false
273		false
274		false
660		false
661		false
662		false
663		false
280		false
664		false
409		false
156		false
158		false
672		false
417		false
673		false
547		false
164		false
292		false
548		false
293		false
166		false
297		false
553		false
170		false
554		false
173		false
302		false
175		false
304		false
178		false
306		false
562		false
179		false
307		false
563		false
565		false
447		false
448		false
323		false
453		false
455		false
583		false
330		false
75		false
205		false
461		false
79		false
82		false
341		false
469		false
601		false
90		false
476		false
351		false
96		false
225		false
482		false
356		false
358		false
232		false
488		false
489		false
106		false
362		false
107		false
492		false
500		false
375		false
120		false
378		false
380		false
514		false
515		false
260		false
520		false
393		false
521		false
652		false
401		false
529		false
530		false
536		false
154		false
666		false
283		false
667		false
165		false
423		false
426		false
557		false
561		false
434		false
435		false
564		false
309		false
569		false
442		false
321		false
197		false
200		false
331		false
77		false
592		false
81		false
593		false
83		false
211		false
597		false
470		false
598		false
343		false
599		false
216		false
600		false
93		false
607		false
352		false
353		false
354		false
611		false
359		false
615		false
616		false
233		false
490		false
236		false
111		false
368		false
630		false
121		false
383		false
269		false
146		false
275		false
152		false
157		false
161		false
549		false
295		false
300		false
308		false
311		false
185		false
314		false
326		false
328		false
329		false
203		false
467		false
84		false
214		false
224		false
100		false
4115		false
