# Supplementary material for: APP Is a Context-Sensitive Regulator of the Hippocampal Presynaptic Active Zone
Source: PLOS journal article supplement (doi:10.1371/journal.pcbi.1004832), 2016-04-19
Supplement: S6 (10.1371/journal.pcbi.1004832.s006) [file journal.pcbi.1004832.s006.cys › CytoscapeSession-2016_01_22-10_07/tables/36-Basic+Network/SHARED_ATTRS-org.cytoscape.model.CyEdge-36+shared+edge.cytable]

CyCSV-Version	1
SUID	shared interaction	shared name
java.lang.Long	java.lang.String	java.lang.String
36 shared edge
1113	pp	P63011 (pp) Q99NE5
2135	pp	P63213 (pp) P62874
1111	pp	P63011 (pp) P47708
2134	pp	P63213 (pp) P18872
2087	pp	P50518 (pp) Q8BVE3
2086	pp	P50518 (pp) Q9Z1G4
2085	pp	P50518 (pp) P63082
2084	pp	P50518 (pp) P57746
2083	pp	P50518 (pp) Q9WTT4
2082	pp	P50518 (pp) Q9Z1G3
2081	pp	P50518 (pp) P50516
2079	pp	Q8BVE3 (pp) Q9Z1G4
1055	pp	P84091 (pp) P17426
2078	pp	Q8BVE3 (pp) P63082
1054	pp	P84091 (pp) P50516
2077	pp	Q8BVE3 (pp) P50516
1053	pp	P84091 (pp) Q68FD5
1052	pp	P84091 (pp) O08585
1050	pp	P84091 (pp) P62743
1049	pp	P84091 (pp) Q6IRU5
1048	pp	P84091 (pp) Q9DBG3
2575	pp	P05064 (pp) Q9WUA3
2574	pp	P05064 (pp) P17182
2572	pp	P05064 (pp) P05063
1030	pp	Q9DBJ1 (pp) P09411
1029	pp	Q9DBJ1 (pp) P06745
2565	pp	P12023 (pp) P46460
2052	pp	Q68FD5 (pp) P62743
2051	pp	Q68FD5 (pp) O08585
1027	pp	Q9DBJ1 (pp) P17751
1026	pp	Q9DBJ1 (pp) P17182
2562	pp	P12023 (pp) P63044
1025	pp	Q9DBJ1 (pp) P52480
2048	pp	Q68FD5 (pp) Q80TZ3
2047	pp	Q68FD5 (pp) O35643
2558	pp	P12023 (pp) P63011
2557	pp	P12023 (pp) O35526
2044	pp	Q68FD5 (pp) Q6IRU5
2040	pp	Q68FD5 (pp) P17426
2552	pp	P12023 (pp) Q62277
2551	pp	P12023 (pp) Q9Z1G3
2539	pp	P12023 (pp) O88737
2537	pp	P12023 (pp) Q9JIS5
2533	pp	P12023 (pp) O08599
3045	pp	Q9D1K2 (pp) Q9Z1G4
2532	pp	P12023 (pp) P39053
3044	pp	Q9D1K2 (pp) P62814
3043	pp	Q9D1K2 (pp) P63082
3041	pp	Q9D1K2 (pp) Q9Z1G3
2528	pp	P12023 (pp) P46096
3040	pp	Q9D1K2 (pp) Q9WTT4
3038	pp	Q9D1K2 (pp) P51863
3036	pp	Q9D1K2 (pp) P50516
2521	pp	P12023 (pp) P60879
3033	pp	Q9D1K2 (pp) Q8BVE3
2520	pp	P12023 (pp) O55042
3032	pp	Q9D1K2 (pp) P57746
3031	pp	Q9D1K2 (pp) P50518
3030	pp	Q9Z1G4 (pp) P50516
2517	pp	P12023 (pp) P01831
3029	pp	Q9Z1G4 (pp) Q9WTT4
2516	pp	P12023 (pp) Q68FD5
3028	pp	Q9Z1G4 (pp) P63082
2515	pp	P12023 (pp) Q9Z1G4
3027	pp	Q9Z1G4 (pp) Q62277
2511	pp	P12023 (pp) P63017
2510	pp	P12023 (pp) P61264
2509	pp	P62814 (pp) P51863
2508	pp	P62814 (pp) P50516
2507	pp	P62814 (pp) Q8BVE3
2506	pp	P62814 (pp) P57746
2504	pp	P62814 (pp) Q9Z1G3
2503	pp	P62814 (pp) P63082
1990	pp	P60879 (pp) P51863
1989	pp	P60879 (pp) P63044
2501	pp	P62814 (pp) P50518
1988	pp	P60879 (pp) P47708
1476	pp	P52480 (pp) P17182
2500	pp	P62814 (pp) Q9WTT4
1987	pp	P60879 (pp) Q62442
2499	pp	P62814 (pp) Q9Z1G4
1986	pp	P60879 (pp) P17426
1474	pp	P52480 (pp) P47857
1985	pp	P60879 (pp) P46096
1473	pp	P52480 (pp) Q9WUA3
1983	pp	P60879 (pp) P16858
2495	pp	O35526 (pp) Q62442
1471	pp	P52480 (pp) P05063
1470	pp	P52480 (pp) P09411
2493	pp	O35526 (pp) P60879
1980	pp	P60879 (pp) O08599
2492	pp	O35526 (pp) O08599
1468	pp	P52480 (pp) P06151
1979	pp	P60879 (pp) P61264
1977	pp	P60879 (pp) Q8K400
1465	pp	P52480 (pp) P05064
1976	pp	P60879 (pp) O55042
1464	pp	P52480 (pp) P06745
1975	pp	P60879 (pp) P63017
1462	pp	Q9DB05 (pp) P46460
2473	pp	Q62442 (pp) P61264
1439	pp	P06745 (pp) P05064
1438	pp	P06745 (pp) Q9WUA3
925	pp	O55042 (pp) O35526
1435	pp	P06745 (pp) P47857
1433	pp	P06745 (pp) P17182
1430	pp	P06745 (pp) P06151
1429	pp	P06745 (pp) P16858
1428	pp	P06745 (pp) P09411
1427	pp	P06745 (pp) P05063
1422	pp	P61264 (pp) P63044
903	pp	P28663 (pp) P46460
2942	pp	P46460 (pp) Q9CWZ7
2941	pp	P46460 (pp) Q62442
2940	pp	P46460 (pp) O08599
2939	pp	P46460 (pp) O35526
1912	pp	P18872 (pp) P06151
1911	pp	P18872 (pp) P62874
1910	pp	P18872 (pp) P12023
2919	pp	P17427 (pp) P17426
2918	pp	P17427 (pp) Q68FD5
2917	pp	P17427 (pp) O08585
2915	pp	P17427 (pp) P62743
2914	pp	P17427 (pp) P39053
866	pp	P62743 (pp) O08585
2912	pp	P17427 (pp) Q6IRU5
2911	pp	P17427 (pp) P84091
2910	pp	P17427 (pp) Q9DBG3
2909	pp	P17426 (pp) P62743
2908	pp	P17426 (pp) O08585
2905	pp	P57746 (pp) P50516
2904	pp	P57746 (pp) Q8BVE3
2903	pp	P57746 (pp) Q9Z1G4
2900	pp	P57746 (pp) Q9Z1G3
852	pp	O08599 (pp) P61264
2899	pp	P57746 (pp) Q9WTT4
2897	pp	P57746 (pp) P63082
2890	pp	P50516 (pp) P39053
840	pp	O35643 (pp) Q80TZ3
839	pp	O35643 (pp) O08585
2885	pp	P50516 (pp) P46460
2882	pp	P50516 (pp) P01831
2876	pp	P50516 (pp) O35643
1852	pp	P63044 (pp) O55042
1851	pp	P63044 (pp) P28663
2873	pp	P50516 (pp) P63082
1849	pp	P63044 (pp) P39053
1847	pp	P63044 (pp) P62874
1846	pp	P63044 (pp) O35526
2869	pp	P50516 (pp) P17427
1844	pp	P63044 (pp) P18872
1843	pp	P63044 (pp) P51863
2865	pp	P50516 (pp) P17426
1313	pp	Q9WTT4 (pp) P50516
2849	pp	P17751 (pp) P06745
1312	pp	Q9WTT4 (pp) P63082
2848	pp	P17751 (pp) P05063
2847	pp	P17751 (pp) P17182
2845	pp	P17751 (pp) P09411
2836	pp	P17751 (pp) P47857
2835	pp	P17751 (pp) P16858
781	pp	Q80TZ3 (pp) O08585
780	pp	Q80TZ3 (pp) P50516
2828	pp	P17751 (pp) P05064
2826	pp	P17751 (pp) Q9WUA3
2823	pp	P17751 (pp) P52480
2822	pp	P17751 (pp) P06151
1283	pp	O88737 (pp) Q6PH08
1282	pp	O88737 (pp) Q99NE5
2818	pp	P09411 (pp) P17182
1280	pp	Q6PH08 (pp) Q99NE5
2816	pp	P09411 (pp) P16858
2815	pp	P09411 (pp) P06151
1278	pp	P39053 (pp) Q68FD5
1277	pp	P39053 (pp) P17426
762	pp	Q99NE5 (pp) Q9EQZ6
732	pp	Q03157 (pp) P12023
722	pp	Q9CQW1 (pp) P46460
1227	pp	P05063 (pp) Q9WUA3
1224	pp	P05063 (pp) P17182
3780	pp	Q06335 (pp) P12023
3778	pp	Q06335 (pp) Q03157
1214	pp	P17182 (pp) Q9WUA3
697	pp	Q9QYX7 (pp) Q9EQZ6
693	pp	O54774 (pp) Q68FD5
1171	pp	P47857 (pp) P05064
1170	pp	P47857 (pp) P05063
3727	pp	P51863 (pp) Q9Z1G3
1679	pp	P63017 (pp) P63037
3726	pp	P51863 (pp) P63082
3725	pp	P51863 (pp) Q8BVE3
3724	pp	P51863 (pp) P50516
3723	pp	P51863 (pp) P57746
3722	pp	P51863 (pp) Q9Z1G4
1161	pp	Q9DBG3 (pp) Q6IRU5
3720	pp	P51863 (pp) P50518
1672	pp	P63017 (pp) Q9QYJ0
1160	pp	Q9DBG3 (pp) O08585
2183	pp	Q62277 (pp) P60879
3719	pp	P51863 (pp) Q9WTT4
1158	pp	Q9DBG3 (pp) Q68FD5
2181	pp	Q62277 (pp) P46096
3717	pp	Q9Z1G3 (pp) Q9WTT4
1157	pp	Q9DBG3 (pp) P17426
2180	pp	Q62277 (pp) P63044
3716	pp	Q9Z1G3 (pp) Q9Z1G4
2179	pp	Q62277 (pp) P01831
3715	pp	Q9Z1G3 (pp) P50516
1155	pp	Q9DBG3 (pp) P62743
1154	pp	Q9DBG3 (pp) P60879
3713	pp	Q9Z1G3 (pp) Q8BVE3
3712	pp	Q9Z1G3 (pp) P63082
1152	pp	Q6IRU5 (pp) P62743
1151	pp	Q6IRU5 (pp) P17426
1148	pp	P17183 (pp) P05064
1147	pp	P17183 (pp) Q9DBJ1
1146	pp	P17183 (pp) P05063
1145	pp	P17183 (pp) P17751
1143	pp	P17183 (pp) P09411
1142	pp	P17183 (pp) P52480
1139	pp	P17183 (pp) P06745
2370	pp	P60710 (pp) Q9R0Q6
2369	pp	P60710 (pp) P59999
2368	pp	P60710 (pp) Q9D898
831	pp	Q61644 (pp) P10637
2366	pp	P60710 (pp) P16054
2365	pp	P60710 (pp) Q9CPW4
2364	pp	P60710 (pp) Q9JM76
1590	pp	Q99JY9 (pp) P59999
1589	pp	Q99JY9 (pp) Q9JM76
1587	pp	P47754 (pp) P16054
2354	pp	Q02248 (pp) P63001
1585	pp	P47754 (pp) P47757
1840	pp	P46660 (pp) P19246
1071	pp	P62746 (pp) P63330
1839	pp	Q9JHU4 (pp) Q60996
1838	pp	Q9JHU4 (pp) Q99KJ8
1836	pp	Q9JHU4 (pp) P68368
1833	pp	Q9JHU4 (pp) O08788
802	pp	P18760 (pp) P40124
1570	pp	P62962 (pp) Q9JJV2
1569	pp	P62962 (pp) P59999
1057	pp	P99024 (pp) Q6PER3
1056	pp	P99024 (pp) P60879
1567	pp	P62962 (pp) P99024
798	pp	P08551 (pp) P19246
1566	pp	P62962 (pp) P60710
1309	pp	Q9CVB6 (pp) Q9JM76
1565	pp	P16054 (pp) P47757
1308	pp	Q9CVB6 (pp) Q9CPW4
2075	pp	Q9JLB0 (pp) Q99N28
795	pp	P08553 (pp) P19246
2074	pp	Q9JLB0 (pp) Q8R5M8
1306	pp	Q9CVB6 (pp) Q9R0Q6
794	pp	P08553 (pp) P46660
2073	pp	Q9JLB0 (pp) O70318
1305	pp	Q9CVB6 (pp) P60710
1304	pp	Q9CVB6 (pp) Q99JY9
1303	pp	Q9CVB6 (pp) Q9D898
1559	pp	P16054 (pp) P23242
1302	pp	Q9CVB6 (pp) P47757
1301	pp	Q9CVB6 (pp) P59999
783	pp	Q7TMB8 (pp) P28660
782	pp	Q7TMB8 (pp) Q9JJV2
779	pp	O88643 (pp) P63001
777	pp	O88643 (pp) Q68FF6
1017	pp	P30999 (pp) Q02248
2553	pp	P12023 (pp) Q9JHU4
2039	pp	Q9R0Q6 (pp) Q9JM76
2038	pp	Q9R0Q6 (pp) P59999
2037	pp	Q9R0Q6 (pp) Q9CPW4
2036	pp	Q9JM76 (pp) Q9D898
2548	pp	P12023 (pp) Q9D6F9
2034	pp	Q9JM76 (pp) P59999
1009	pp	Q62261 (pp) P16546
2543	pp	P12023 (pp) Q64332
746	pp	Q91VR7 (pp) P14873
1000	pp	Q9JIS5 (pp) Q68FF6
2535	pp	P12023 (pp) P60710
2530	pp	P12023 (pp) P08551
993	pp	O70318 (pp) P63001
1248	pp	P15116 (pp) Q02248
2527	pp	P12023 (pp) P57780
1246	pp	P15116 (pp) P23242
1245	pp	P15116 (pp) P30999
989	pp	Q64332 (pp) Q9JJV2
2524	pp	P12023 (pp) O54991
2523	pp	P12023 (pp) Q812A2
2522	pp	P12023 (pp) P46660
727	pp	P20152 (pp) P16054
1747	pp	Q9JJV2 (pp) P60710
1746	pp	Q9JJV2 (pp) Q9QXS6
720	pp	Q9ERD7 (pp) P47757
2768	pp	Q6PER3 (pp) O08788
3788	pp	Q9QUI0 (pp) Q06335
3786	pp	Q9QUI0 (pp) P30999
3785	pp	Q9QUI0 (pp) P63001
713	pp	Q9CYT6 (pp) P40124
1992	pp	P60879 (pp) P28660
3784	pp	Q9QUI0 (pp) O88643
3782	pp	Q06335 (pp) P63330
3268	pp	P63085 (pp) Q64010
3779	pp	Q06335 (pp) P63001
2498	pp	Q9WV92 (pp) Q8R5M8
1217	pp	Q9CPW4 (pp) P59999
2497	pp	Q9WV92 (pp) P12023
1216	pp	Q9CPW4 (pp) Q9JM76
1982	pp	P60879 (pp) P68368
1981	pp	P60879 (pp) Q7TSJ2
698	pp	P23927 (pp) P16054
695	pp	P58771 (pp) P16054
1974	pp	P28660 (pp) Q9JJV2
691	pp	O88342 (pp) Q9CVB6
690	pp	O88342 (pp) P47757
689	pp	O88342 (pp) P18760
1953	pp	P49615 (pp) P19246
920	pp	P20357 (pp) Q9ERD7
1176	pp	Q99104 (pp) P08551
917	pp	P20357 (pp) P14873
2450	pp	Q99KJ8 (pp) O08788
2449	pp	Q99KJ8 (pp) P28667
1167	pp	P10637 (pp) P12023
1165	pp	P10637 (pp) O55042
1163	pp	P10637 (pp) Q9D8Y0
1670	pp	Q9D898 (pp) P59999
3695	pp	P47757 (pp) O89053
3694	pp	Q8C8R3 (pp) P16546
3691	pp	P16546 (pp) O08788
3690	pp	P63330 (pp) Q76MZ3
2922	pp	P31938 (pp) P63085
3689	pp	P63330 (pp) Q60996
3432	pp	Q3UHD9 (pp) Q9Z2H5
3688	pp	P63330 (pp) Q61151
2920	pp	P31938 (pp) P16054
3431	pp	Q9Z2H5 (pp) Q99N28
870	pp	Q9CQI6 (pp) P60710
3686	pp	P63330 (pp) Q6P1F6
3685	pp	Q76MZ3 (pp) Q6P1F6
3684	pp	Q76MZ3 (pp) O08788
3681	pp	Q76MZ3 (pp) Q99KJ8
3680	pp	Q76MZ3 (pp) Q60996
3676	pp	Q76MZ3 (pp) P18052
3675	pp	Q76MZ3 (pp) Q61151
2519	pp	P12023 (pp) P97300
724	pp	Q6P9K9 (pp) O70589
851	pp	O08599 (pp) P16546
2512	pp	P12023 (pp) P11627
848	pp	P20444 (pp) P26645
716	pp	Q63810 (pp) P48453
1991	pp	P60879 (pp) P06837
706	pp	D3YVF0 (pp) P48453
2496	pp	Q8R5M8 (pp) O70589
1842	pp	P63044 (pp) P35802
1070	pp	P11627 (pp) P13595
1067	pp	P13595 (pp) P16546
1192	pp	P08226 (pp) P12023
807	pp	P26645 (pp) P63318
1190	pp	P08226 (pp) P20357
1062	pp	O70589 (pp) O08599
927	pp	P63328 (pp) Q63810
3227	pp	P68404 (pp) P26645
922	pp	P20357 (pp) Q6PHZ2
921	pp	P20357 (pp) P11798
915	pp	Q3UVX5 (pp) P62204
1040	pp	P28652 (pp) Q6PHZ2
1035	pp	P62204 (pp) P63328
1034	pp	P62204 (pp) O70589
773	pp	Q91XV3 (pp) P26645
1669	pp	Q9R0K7 (pp) P12023
771	pp	Q91XV3 (pp) P06837
2559	pp	P12023 (pp) P06837
1022	pp	P23818 (pp) Q3UVX5
765	pp	Q9QY76 (pp) O35526
758	pp	P11798 (pp) P28652
2545	pp	P12023 (pp) P35564
3693	pp	Q8C8R3 (pp) P11627
1004	pp	P48453 (pp) P62204
1003	pp	P48453 (pp) P63328
2538	pp	P12023 (pp) P13595
997	pp	Q9CS84 (pp) O70589
2525	pp	P12023 (pp) P28652
1244	pp	P06837 (pp) P62204
4076	pp	Q01097 (pp) Q80Z38
3993	pp	Q9CQZ5 (pp) Q9D6J6
3953	pp	O08749 (pp) Q9D051
3896	pp	Q9D3D9 (pp) O09111
3888	pp	Q03265 (pp) P68510
3823	pp	P12382 (pp) P35438
3857	pp	P68510 (pp) P05202
3777	pp	P23819 (pp) P35436
3770	pp	Q9CZU6 (pp) Q9DCD0
3710	pp	P62259 (pp) P47757
3673	pp	Q9CQZ6 (pp) Q9CQ54
3632	pp	Q9DCT2 (pp) Q9CQ69
3539	pp	P08249 (pp) Q9D6R2
3473	pp	P54071 (pp) P06151
3470	pp	Q9DB20 (pp) Q9CQH3
3430	pp	Q6P9K8 (pp) O88952
3426	pp	P19783 (pp) Q9CQH3
3407	pp	Q8BK64 (pp) P63038
3383	pp	Q8BH95 (pp) Q9CZ13
3341	pp	Q9D0M3 (pp) Q9DB20
3296	pp	Q99LC3 (pp) Q99LY9
3278	pp	Q8BMF4 (pp) Q05920
3269	pp	P63085 (pp) P35438
3266	pp	P61027 (pp) Q61598
3631	pp	Q9DCT2 (pp) P19783
3261	pp	P56480 (pp) P17742
3228	pp	P68404 (pp) P35438
3469	pp	Q9DB20 (pp) P67778
3225	pp	Q9JLJ2 (pp) Q91VR2
3216	pp	Q9CPQ8 (pp) Q9CQH3
3769	pp	Q9CZU6 (pp) Q91VD9
3188	pp	Q9DCS9 (pp) Q9CR68
3402	pp	P63038 (pp) P52196
4075	pp	Q01097 (pp) P05132
3149	pp	Q9CQJ8 (pp) Q06185
3090	pp	Q9DC70 (pp) Q9D0S9
3026	pp	Q9WUM5 (pp) Q9D0K2
3012	pp	Q9CQN1 (pp) P63037
3006	pp	Q9DCW4 (pp) Q9CPP6
4074	pp	Q01097 (pp) P15105
2943	pp	P46460 (pp) Q01097
2935	pp	Q08331 (pp) Q9CQ62
3340	pp	Q9D0M3 (pp) P62897
3260	pp	P56480 (pp) Q9D2G2
2924	pp	Q3UIU2 (pp) Q9D6J6
3339	pp	Q9D0M3 (pp) P70404
2853	pp	O88441 (pp) Q9D6J6
3630	pp	Q9DCT2 (pp) Q99LC3
2850	pp	Q7TQI3 (pp) P68510
3538	pp	P08249 (pp) Q06185
3856	pp	P68510 (pp) P17751
3401	pp	P63038 (pp) P09411
3295	pp	Q99LC3 (pp) Q9Z1P6
2796	pp	P63137 (pp) P62812
3629	pp	Q9DCT2 (pp) O70325
3992	pp	Q9CQZ5 (pp) P48771
2780	pp	Q64133 (pp) P47738
2772	pp	P63005 (pp) Q6PER3
2767	pp	O70161 (pp) Q9Z1B3
2762	pp	Q921G7 (pp) Q8BWT1
3628	pp	Q9DCT2 (pp) Q9CQA3
2683	pp	P12787 (pp) Q9CR68
2638	pp	Q61425 (pp) Q99LC5
2606	pp	Q8BGH2 (pp) Q99LX0
3718	pp	Q9Z1G3 (pp) P62331
3627	pp	Q9DCT2 (pp) Q8K1Z0
3089	pp	Q9DC70 (pp) Q03265
3277	pp	Q8BMF4 (pp) Q8BWT1
3400	pp	P63038 (pp) Q99LC5
2582	pp	P11499 (pp) P62259
2576	pp	P05064 (pp) P17710
2570	pp	P48320 (pp) P61922
3672	pp	Q9CQZ6 (pp) Q99LC3
3537	pp	P08249 (pp) Q91VR2
4073	pp	Q01097 (pp) O35526
3338	pp	Q9D0M3 (pp) O09111
3536	pp	P08249 (pp) P70404
2564	pp	P12023 (pp) Q9WV18
2490	pp	P56391 (pp) O09111
2484	pp	Q9D172 (pp) Q9CQH3
2814	pp	Q9Z1P6 (pp) Q9D6J6
2472	pp	P26443 (pp) Q91Z53
2447	pp	Q99KI0 (pp) Q9D2G2
3365	pp	Q9CZ13 (pp) Q9ERS2
3795	pp	P05202 (pp) P54071
3337	pp	Q9D0M3 (pp) P97807
2375	pp	Q6PHZ2 (pp) P60710
2362	pp	Q02248 (pp) P05480
4072	pp	Q01097 (pp) P51881
2346	pp	Q91WD5 (pp) Q8K2B3
3776	pp	P23819 (pp) P68369
2252	pp	Q8VEM8 (pp) Q9D6J6
2248	pp	Q3ULD5 (pp) Q8R4N0
2682	pp	P12787 (pp) P52503
2194	pp	Q60631 (pp) Q62277
2177	pp	P62073 (pp) P99029
3148	pp	Q9CQJ8 (pp) P19783
3692	pp	P16546 (pp) Q9CQV8
2158	pp	Q9CQR4 (pp) Q9CQH3
2149	pp	P40142 (pp) P09411
2793	pp	O70325 (pp) Q99LX0
3224	pp	Q9JLJ2 (pp) Q9EQ20
2132	pp	Q99KR7 (pp) O35658
2128	pp	Q7TMF3 (pp) Q9DCX2
2088	pp	Q61735 (pp) P97797
3626	pp	Q9DCT2 (pp) P19536
2065	pp	Q60864 (pp) Q9QYJ0
3952	pp	O08749 (pp) P97807
2776	pp	P47738 (pp) P61922
2057	pp	Q68FD5 (pp) P62259
2033	pp	Q91YT0 (pp) Q06185
2681	pp	P12787 (pp) Q9D6R2
2011	pp	Q9DCJ5 (pp) P50516
3364	pp	Q9CZ13 (pp) Q9DCS9
3259	pp	P56480 (pp) P63038
4071	pp	Q01097 (pp) P68510
3468	pp	Q9DB20 (pp) Q9DCX2
2345	pp	Q91WD5 (pp) Q9CQZ6
3951	pp	O08749 (pp) Q91YT0
2291	pp	Q8K2B3 (pp) P97807
1973	pp	O08756 (pp) Q99JY0
2858	pp	P70404 (pp) Q91VR2
2563	pp	P12023 (pp) P04925
1957	pp	P39688 (pp) P49615
1952	pp	P03930 (pp) Q9D3D9
1949	pp	Q9CQ75 (pp) Q9DC70
1909	pp	Q8VDD5 (pp) Q01097
1906	pp	P51174 (pp) Q99JY0
3671	pp	Q9CQZ6 (pp) Q3UIU2
2923	pp	Q3UIU2 (pp) Q9CQH3
1948	pp	Q9CQ75 (pp) P52503
2290	pp	Q8K2B3 (pp) Q8JZQ2
1894	pp	Q8JZN5 (pp) Q99LC5
3214	pp	Q91VD9 (pp) Q9ERS2
4070	pp	Q01097 (pp) Q60676
2127	pp	Q7TMF3 (pp) Q9CXZ1
1861	pp	Q8BG51 (pp) P63001
2446	pp	Q99KI0 (pp) Q62351
3709	pp	P62259 (pp) P46660
2131	pp	Q99KR7 (pp) P56480
2176	pp	P62073 (pp) O08756
3625	pp	Q9DCT2 (pp) Q9DC70
3382	pp	Q8BH95 (pp) Q8BWT1
3624	pp	Q9DCT2 (pp) Q3UIU2
2895	pp	P50516 (pp) Q9JHU4
3555	pp	Q9CQ69 (pp) P56391
1829	pp	Q9D855 (pp) Q8K3J1
2637	pp	Q61425 (pp) Q9WUM5
3991	pp	Q9CQZ5 (pp) Q91VR2
3990	pp	Q9CQZ5 (pp) Q91VD9
1828	pp	Q9D855 (pp) Q9DCX2
3623	pp	Q9DCT2 (pp) Q9DB77
3887	pp	Q03265 (pp) Q91VM9
3886	pp	Q03265 (pp) Q9DC69
3258	pp	P56480 (pp) P50516
3622	pp	Q9DCT2 (pp) Q9CQQ7
1736	pp	O88696 (pp) O35129
2233	pp	P52503 (pp) Q9D6J6
3005	pp	Q9DCW4 (pp) Q9DCJ5
1703	pp	Q9CZS1 (pp) Q9EQ20
1947	pp	Q9CQ75 (pp) Q91YT0
2771	pp	P63005 (pp) O08788
1700	pp	P70232 (pp) P18052
1697	pp	P56379 (pp) Q9CQH3
1685	pp	Q9D023 (pp) Q99LC5
2096	pp	Q9DCX2 (pp) Q9ERS2
4069	pp	Q01097 (pp) P12367
2056	pp	Q68FD5 (pp) Q61548
2080	pp	Q8BVE3 (pp) P45878
2625	pp	Q99LC5 (pp) O09111
2491	pp	Q9WV18 (pp) Q80T41
2894	pp	P50516 (pp) Q9R0K7
1667	pp	P13707 (pp) Q64521
3482	pp	Q9D6R2 (pp) P70404
4068	pp	Q01097 (pp) P63085
3187	pp	Q9DCS9 (pp) Q9DC69
2680	pp	P12787 (pp) Q9DCS9
1662	pp	Q9QUH0 (pp) P20108
2032	pp	Q91YT0 (pp) Q9CQH3
3708	pp	P62259 (pp) Q9JLM8
2745	pp	Q9CQA3 (pp) Q9D0M3
3025	pp	Q9WUM5 (pp) Q9DC69
2744	pp	Q9CQA3 (pp) Q9CZ13
1655	pp	Q64010 (pp) P05480
2031	pp	Q91YT0 (pp) Q9D6J6
3621	pp	Q9DCT2 (pp) Q9D6J6
3336	pp	Q9D0M3 (pp) Q9D3D9
1649	pp	P97450 (pp) Q91VM9
2489	pp	P56391 (pp) Q9D3D9
2743	pp	Q9CQA3 (pp) Q06185
3707	pp	P62259 (pp) O88935
2561	pp	P12023 (pp) P62823
1605	pp	Q99PT1 (pp) P56480
1946	pp	Q9CQ75 (pp) Q9DB20
1599	pp	Q99MN9 (pp) Q9EQ20
2742	pp	Q9CQA3 (pp) Q8K3J1
1593	pp	Q99JY9 (pp) P14094
3004	pp	Q9DCW4 (pp) P56391
2679	pp	P12787 (pp) Q99LC5
4067	pp	Q01097 (pp) P47754
2560	pp	P12023 (pp) Q9CZT8
2404	pp	P97807 (pp) Q06185
3885	pp	Q03265 (pp) Q9CR68
3950	pp	O08749 (pp) Q03265
1583	pp	P35486 (pp) Q9WUM5
1573	pp	P22315 (pp) Q61102
2445	pp	Q99KI0 (pp) Q91VR2
1827	pp	Q9D855 (pp) Q91VR2
3787	pp	Q9QUI0 (pp) Q99PT1
1549	pp	P09671 (pp) Q9CQH3
1515	pp	P18572 (pp) O35465
2893	pp	P50516 (pp) Q8BPN8
3620	pp	Q9DCT2 (pp) Q9DCS9
1945	pp	Q9CQ75 (pp) Q9D855
2232	pp	P52503 (pp) P48771
2813	pp	Q9Z1P6 (pp) Q9ERS2
3335	pp	Q9D0M3 (pp) Q9ERS2
1507	pp	Q9CQ92 (pp) Q8K1M6
2636	pp	Q61425 (pp) Q9DBL1
1503	pp	P53395 (pp) Q9JHI5
1489	pp	Q93092 (pp) P52480
1648	pp	P97450 (pp) Q9DCS9
2444	pp	Q99KI0 (pp) Q9CQH3
3003	pp	Q9DCW4 (pp) P51174
2361	pp	Q02248 (pp) Q61301
2741	pp	Q9CQA3 (pp) Q9Z2I9
2624	pp	Q99LC5 (pp) P50544
2403	pp	P97807 (pp) P54071
1889	pp	Q9CXZ1 (pp) Q9CPP6
2962	pp	Q9CPP6 (pp) Q9D6J6
1445	pp	Q61831 (pp) P35438
2494	pp	O35526 (pp) P63040
2402	pp	P97807 (pp) Q99LX0
1442	pp	Q923T9 (pp) P35436
1440	pp	Q920I9 (pp) Q8BPN8
3467	pp	Q9DB20 (pp) O09111
2157	pp	Q9CQR4 (pp) P97450
3989	pp	Q9CQZ5 (pp) Q9CPP6
1425	pp	Q3UTJ2 (pp) Q7TPR4
1421	pp	P70441 (pp) P26040
1419	pp	Q9EP69 (pp) Q62420
3174	pp	Q9CR68 (pp) P43024
2678	pp	P12787 (pp) Q9D3D9
1407	pp	P14873 (pp) P62259
3257	pp	P56480 (pp) P09103
1401	pp	P56382 (pp) P97450
3670	pp	Q9CQZ6 (pp) Q9CQH3
2126	pp	Q7TMF3 (pp) O09111
2892	pp	P50516 (pp) P60710
2163	pp	Q9CQV8 (pp) P62259
1388	pp	Q3UMR5 (pp) P50516
3554	pp	Q9CQ69 (pp) Q8K3J1
1598	pp	Q99MN9 (pp) Q91ZA3
3949	pp	O08749 (pp) Q99LC5
1385	pp	Q61879 (pp) P63101
1888	pp	Q9CXZ1 (pp) Q9CQZ5
1356	pp	Q9QWI6 (pp) Q8R001
2740	pp	Q9CQA3 (pp) Q9Z1P6
1944	pp	Q9CQ75 (pp) P97450
1743	pp	Q9CQQ7 (pp) Q9CQH3
2891	pp	P50516 (pp) Q7TPR4
2568	pp	P61922 (pp) Q9DBF1
2443	pp	Q99KI0 (pp) P17751
1664	pp	Q64521 (pp) Q64516
3024	pp	Q9WUM5 (pp) Q9CQQ7
3406	pp	Q8BK64 (pp) Q60864
1353	pp	Q8VDN2 (pp) P23819
3822	pp	P12382 (pp) P17710
3535	pp	P08249 (pp) O35658
3553	pp	Q9CQ69 (pp) Q99LY9
3855	pp	P68510 (pp) Q99PT1
1346	pp	Q6PCP5 (pp) P23506
1344	pp	Q9D6J5 (pp) Q91VR2
1320	pp	Q00612 (pp) Q93092
3619	pp	Q9DCT2 (pp) Q9D3D9
2251	pp	Q8VEM8 (pp) Q9CQH3
1654	pp	Q64010 (pp) P63101
1858	pp	P63001 (pp) Q5FWK3
2055	pp	Q68FD5 (pp) Q8CHU3
1826	pp	Q9D855 (pp) Q9CQZ5
1647	pp	P97450 (pp) Q99LY9
2739	pp	Q9CQA3 (pp) Q9DCS9
3104	pp	Q06185 (pp) Q99LY9
1887	pp	Q9CXZ1 (pp) Q9CQC7
3669	pp	Q9CQZ6 (pp) Q9CR68
2605	pp	Q8BGH2 (pp) Q8BH95
2193	pp	Q60631 (pp) Q62420
2257	pp	P68369 (pp) P39053
3103	pp	Q06185 (pp) Q9D6J6
3948	pp	O08749 (pp) Q6PB66
1300	pp	Q9CQC7 (pp) Q9CQ54
3102	pp	Q06185 (pp) Q9CQH3
3534	pp	P08249 (pp) P17751
1270	pp	P31324 (pp) Q8BR92
2677	pp	P12787 (pp) Q8K3J1
1264	pp	P97772 (pp) Q3UHD9
1262	pp	Q8CHT0 (pp) P29758
3552	pp	Q9CQ69 (pp) Q9D6J6
3768	pp	Q9CZU6 (pp) P05202
1582	pp	P35486 (pp) P06745
2344	pp	Q91WD5 (pp) Q99MN9
3088	pp	Q9DC70 (pp) Q9CQZ5
2162	pp	Q9CQV8 (pp) P63101
1257	pp	Q99L47 (pp) P63038
1256	pp	Q7TQF7 (pp) P17427
1269	pp	P31324 (pp) P12367
3988	pp	Q9CQZ5 (pp) Q9CQZ6
1261	pp	Q8CHT0 (pp) Q9DBF1
1299	pp	Q9CQC7 (pp) Q06185
1548	pp	P09671 (pp) P09411
4066	pp	Q01097 (pp) Q03265
3334	pp	Q9D0M3 (pp) Q9CQZ6
1243	pp	P07901 (pp) P61982
3425	pp	P19783 (pp) Q9CQ69
3533	pp	P08249 (pp) Q9DCD0
1735	pp	O88696 (pp) Q9D0M3
3333	pp	Q9D0M3 (pp) Q9CQ69
3186	pp	Q9DCS9 (pp) Q9CQQ7
1604	pp	Q99PT1 (pp) O35465
1460	pp	Q9Z2I9 (pp) Q60597
1279	pp	P39053 (pp) P04925
3767	pp	Q9CZU6 (pp) Q8BKZ9
2889	pp	P50516 (pp) Q7TQF7
3101	pp	Q06185 (pp) P56391
2888	pp	P50516 (pp) P53395
1951	pp	P03930 (pp) Q91VR2
1757	pp	Q9DC69 (pp) Q91VR2
1493	pp	Q9JHI5 (pp) Q8BMS1
2343	pp	Q91WD5 (pp) Q9DCJ5
2471	pp	P26443 (pp) Q61425
1678	pp	P63017 (pp) Q60864
2442	pp	Q99KI0 (pp) Q9DC69
1742	pp	Q9CQQ7 (pp) Q99LY9
3920	pp	Q9D051 (pp) Q03265
3363	pp	Q9CZ13 (pp) P97807
1212	pp	Q9Z268 (pp) Q06335
3466	pp	Q9DB20 (pp) Q9D6J5
3256	pp	P56480 (pp) Q9D3D9
3532	pp	P08249 (pp) P56480
1825	pp	Q9D855 (pp) Q9D3D9
1905	pp	P51174 (pp) Q8BGD5
3185	pp	Q9DCS9 (pp) Q06185
2738	pp	Q9CQA3 (pp) Q9CQZ6
1210	pp	P42125 (pp) Q9Z1P6
3087	pp	Q9DC70 (pp) Q8K2B3
1459	pp	Q9Z2I9 (pp) Q9WUM5
3086	pp	Q9DC70 (pp) P62073
3362	pp	Q9CZ13 (pp) P67778
1196	pp	Q61290 (pp) Q8R0S4
1458	pp	Q9Z2I9 (pp) P23506
2035	pp	Q9JM76 (pp) P68510
2030	pp	Q91YT0 (pp) P70404
2753	pp	Q8BWT1 (pp) Q9D0K2
1194	pp	P08226 (pp) Q91ZX7
1187	pp	Q8BLK3 (pp) P04925
2676	pp	P12787 (pp) Q7TMF3
3919	pp	Q9D051 (pp) Q91VD9
1437	pp	P06745 (pp) Q9WUM5
3147	pp	Q9CQJ8 (pp) Q9DB77
4065	pp	Q01097 (pp) P62835
1760	pp	Q91VM9 (pp) Q9CQQ7
1646	pp	P97450 (pp) Q03265
1185	pp	Q6R891 (pp) Q62277
2812	pp	Q9Z1P6 (pp) P56391
1182	pp	P60766 (pp) P63005
1967	pp	P04925 (pp) Q8VDN2
2594	pp	Q99LX0 (pp) Q62277
4064	pp	Q01097 (pp) Q6PHZ2
2231	pp	P52503 (pp) Q9CQZ6
2623	pp	Q99LC5 (pp) Q9D6J6
2029	pp	Q91YT0 (pp) Q9DC69
1178	pp	Q99104 (pp) Q01097
1547	pp	P09671 (pp) Q91VD9
1436	pp	P06745 (pp) Q05920
1653	pp	Q64010 (pp) P62259
3551	pp	Q9CQ69 (pp) Q9DCJ5
1355	pp	Q9QWI6 (pp) P05480
1173	pp	Q62048 (pp) P63085
4063	pp	Q01097 (pp) Q9D6M3
1488	pp	Q93092 (pp) P47857
3854	pp	P68510 (pp) P68368
1343	pp	Q9D6J5 (pp) Q91VD9
1477	pp	P52480 (pp) P54071
2737	pp	Q9CQA3 (pp) Q9D2G2
1168	pp	Q922R8 (pp) P12023
1581	pp	P35486 (pp) P52480
3002	pp	Q9DCW4 (pp) Q9DB20
3987	pp	Q9CQZ5 (pp) P19536
3706	pp	P62259 (pp) P10637
2401	pp	P97807 (pp) Q9D2G2
2581	pp	P11499 (pp) Q60864
2887	pp	P50516 (pp) P55088
3294	pp	Q99LC3 (pp) Q9DCJ5
1149	pp	P17183 (pp) P40142
1242	pp	P07901 (pp) P11499
1138	pp	Q9QXS6 (pp) P62259
1137	pp	Q8BHL5 (pp) Q60631
3821	pp	P12382 (pp) P05063
1824	pp	Q9D855 (pp) Q9CQJ8
1136	pp	O88712 (pp) Q62420
1209	pp	P42125 (pp) Q9JHI5
2161	pp	Q9CQV8 (pp) P16054
1135	pp	Q9DCB8 (pp) Q9Z1J3
3766	pp	Q9CZU6 (pp) Q8BMF3
3184	pp	Q9DCS9 (pp) Q9CPQ8
1129	pp	Q62425 (pp) Q9DCS9
1118	pp	P38647 (pp) P63101
3465	pp	Q9DB20 (pp) Q99LX0
2586	pp	Q8K1Z0 (pp) Q9DCJ5
1110	pp	Q60598 (pp) P61161
1099	pp	Q9Z0X1 (pp) Q8K1M6
2675	pp	P12787 (pp) Q8VEM8
1097	pp	Q8VDP6 (pp) Q99L43
2604	pp	Q8BGH2 (pp) Q8CAQ8
3255	pp	P56480 (pp) Q60864
3213	pp	Q91VD9 (pp) Q9DC69
3361	pp	Q9CZ13 (pp) Q91VD9
2125	pp	Q7TMF3 (pp) Q9CR68
1093	pp	Q9JLZ3 (pp) Q3ULD5
2289	pp	Q8K2B3 (pp) Q8VEM8
1666	pp	P13707 (pp) Q64516
1783	pp	Q9DB77 (pp) Q9CQH3
2674	pp	P12787 (pp) P17665
1117	pp	P38647 (pp) Q9QYJ0
3947	pp	O08749 (pp) Q60931
3820	pp	P12382 (pp) P05064
2342	pp	Q91WD5 (pp) P08249
3085	pp	Q9DC70 (pp) Q9Z1P6
3381	pp	Q8BH95 (pp) Q8QZT1
2846	pp	P17751 (pp) Q99LX0
1645	pp	P97450 (pp) Q9CQZ6
3173	pp	Q9CR68 (pp) Q9D2G2
1908	pp	Q8VDD5 (pp) P63101
1891	pp	Q60676 (pp) P63330
3646	pp	Q9CQ54 (pp) Q91YT0
2736	pp	Q9CQA3 (pp) Q9DCJ5
1076	pp	Q8VD37 (pp) Q62420
2635	pp	Q61425 (pp) Q9D0K2
2288	pp	Q8K2B3 (pp) Q9D0M3
3146	pp	Q9CQJ8 (pp) Q9Z1P6
1400	pp	P56382 (pp) Q06185
4062	pp	Q01097 (pp) P63101
3172	pp	Q9CR68 (pp) Q06185
2673	pp	P12787 (pp) Q9DC69
1502	pp	P53395 (pp) O08749
2250	pp	Q8VEM8 (pp) Q9CQQ7
3084	pp	Q9DC70 (pp) P42125
2886	pp	P50516 (pp) Q9D6J6
1086	pp	Q8QZT1 (pp) Q8BMS1
1564	pp	P16054 (pp) P16858
2441	pp	Q99KI0 (pp) Q9DB77
1659	pp	P20108 (pp) Q9DB77
2735	pp	Q9CQA3 (pp) P54071
3360	pp	Q9CZ13 (pp) Q9D3D9
3918	pp	Q9D051 (pp) Q8BMF4
2010	pp	Q9DCJ5 (pp) Q8K3J1
1886	pp	Q9CXZ1 (pp) Q99LC3
2148	pp	P40142 (pp) Q9DCD0
3001	pp	Q9DCW4 (pp) Q9D3D9
1823	pp	Q9D855 (pp) Q9D6J6
2147	pp	P40142 (pp) P06745
1073	pp	P62746 (pp) Q8BG51
3464	pp	Q9DB20 (pp) Q9DCJ5
1233	pp	P61982 (pp) P63101
2622	pp	Q99LC5 (pp) Q9DCJ5
3000	pp	Q9DCW4 (pp) Q8JZN5
2400	pp	P97807 (pp) Q9D6R2
1298	pp	Q9CQC7 (pp) Q9Z1P6
3946	pp	O08749 (pp) Q99KI0
1066	pp	Q8BKX1 (pp) P62259
2175	pp	P62073 (pp) Q9ERS2
3765	pp	Q9CZU6 (pp) P26443
2353	pp	P05480 (pp) P35436
1064	pp	O70589 (pp) P16330
2341	pp	Q91WD5 (pp) P70404
2409	pp	Q9ERS2 (pp) P50516
2399	pp	P97807 (pp) Q9CQQ7
2483	pp	Q9D172 (pp) P97807
2287	pp	Q8K2B3 (pp) Q91VR2
1177	pp	Q99104 (pp) P03995
1255	pp	Q7TQF7 (pp) Q68FD5
2286	pp	Q8K2B3 (pp) Q9D2G2
3531	pp	P08249 (pp) Q9D3D9
1580	pp	P35486 (pp) Q9DC69
3145	pp	Q9CQJ8 (pp) Q9DC69
3550	pp	Q9CQ69 (pp) Q9CQH3
2285	pp	Q8K2B3 (pp) Q9Z0X1
2482	pp	Q9D172 (pp) Q91YT0
3399	pp	P63038 (pp) P52480
1297	pp	Q9CQC7 (pp) Q9DC69
1241	pp	P07901 (pp) P63037
2374	pp	Q6PHZ2 (pp) P99024
2284	pp	Q8K2B3 (pp) Q9D051
2283	pp	Q8K2B3 (pp) Q03265
1568	pp	P62962 (pp) P39053
2398	pp	P97807 (pp) P48771
2397	pp	P97807 (pp) O08756
3359	pp	Q9CZ13 (pp) Q91YT0
2761	pp	Q921G7 (pp) Q61425
2999	pp	Q9DCW4 (pp) Q9CQA3
3254	pp	P56480 (pp) P03930
1966	pp	P04925 (pp) Q9Z218
1342	pp	Q9D6J5 (pp) Q9CQ54
2998	pp	Q9DCW4 (pp) Q9Z2I9
2961	pp	Q9CPP6 (pp) Q9DB77
3212	pp	Q91VD9 (pp) Q91YT0
2396	pp	P97807 (pp) Q9DCD0
2230	pp	P52503 (pp) Q91YT0
1943	pp	Q9CQ75 (pp) Q9DCS9
3211	pp	Q91VD9 (pp) Q99LY9
1572	pp	P22315 (pp) P63038
4061	pp	Q01097 (pp) P17426
1756	pp	Q9DC69 (pp) O09111
3171	pp	Q9CR68 (pp) Q9CQQ7
3424	pp	P19783 (pp) Q9CR68
1822	pp	Q9D855 (pp) Q9CQ69
1232	pp	P61982 (pp) P62259
3783	pp	Q06335 (pp) Q9QXJ1
2440	pp	Q99KI0 (pp) Q9CZ13
1208	pp	P42125 (pp) Q8BMS1
2395	pp	P97807 (pp) Q9DCJ5
4060	pp	Q01097 (pp) P68033
2439	pp	Q99KI0 (pp) P63038
1965	pp	P04925 (pp) Q99N28
1885	pp	Q9CXZ1 (pp) Q9CQ54
3618	pp	Q9DCT2 (pp) P48771
3170	pp	Q9CR68 (pp) Q8K3J1
1644	pp	P97450 (pp) P03930
3794	pp	P05202 (pp) Q9D6R2
1475	pp	P52480 (pp) Q9R0Y5
1514	pp	Q8BPN8 (pp) P70404
2760	pp	Q921G7 (pp) Q8BMS1
3276	pp	Q8BMF4 (pp) Q9D2G2
1942	pp	Q9CQ75 (pp) O09111
3042	pp	Q9D1K2 (pp) Q8K3J1
1643	pp	P97450 (pp) Q9ERS2
1058	pp	P99024 (pp) O70589
2634	pp	Q61425 (pp) Q9CZS1
3083	pp	Q9DC70 (pp) Q9CQH3
2672	pp	P12787 (pp) Q9DCW4
1044	pp	P47802 (pp) O88441
1043	pp	Q6PIE5 (pp) P70414
1128	pp	Q62425 (pp) Q9CQ54
3082	pp	Q9DC70 (pp) P56391
2960	pp	Q9CPP6 (pp) Q9DCX2
2556	pp	P12023 (pp) O08756
3813	pp	P35438 (pp) P28652
3705	pp	P62259 (pp) P63101
3210	pp	Q91VD9 (pp) Q3UIU2
1038	pp	Q99K85 (pp) Q91Z53
1821	pp	Q9D855 (pp) Q3UIU2
3617	pp	Q9DCT2 (pp) P17751
1345	pp	P23506 (pp) Q9CQH3
3463	pp	Q9DB20 (pp) Q9CPP6
2064	pp	Q60864 (pp) P17156
1036	pp	P62204 (pp) P35438
3986	pp	Q9CQZ5 (pp) O09111
2621	pp	Q99LC5 (pp) Q6PB66
3081	pp	Q9DC70 (pp) P52503
3616	pp	Q9DCT2 (pp) Q8K3J1
2146	pp	P40142 (pp) Q93092
2282	pp	Q8K2B3 (pp) P52196
1642	pp	P97450 (pp) Q9DB77
2555	pp	P12023 (pp) P68254
1031	pp	Q9DBJ1 (pp) Q93092
2554	pp	P12023 (pp) Q8VDN2
2671	pp	P12787 (pp) P97450
3358	pp	Q9CZ13 (pp) O09111
2281	pp	Q8K2B3 (pp) Q9CPP6
1024	pp	P23818 (pp) P35436
2394	pp	P97807 (pp) Q9DCS9
2959	pp	Q9CPP6 (pp) P48771
1020	pp	Q68FF6 (pp) P63101
2764	pp	Q9Z1B3 (pp) Q01097
1116	pp	P38647 (pp) P63038
3144	pp	Q9CQJ8 (pp) O09111
2811	pp	Q9Z1P6 (pp) Q3UIU2
1546	pp	P09671 (pp) Q9D6J6
2844	pp	P17751 (pp) Q93092
1759	pp	Q91VM9 (pp) P63082
1603	pp	Q99PT1 (pp) P63001
3985	pp	Q9CQZ5 (pp) P97450
2770	pp	P63005 (pp) Q99KJ8
3668	pp	Q9CQZ6 (pp) Q9DCS9
1820	pp	Q9D855 (pp) P52503
1734	pp	O88696 (pp) Q9DB20
1383	pp	P63101 (pp) P62482
1014	pp	Q9R0N7 (pp) P60879
1641	pp	P97450 (pp) Q06185
2810	pp	Q9Z1P6 (pp) Q9D3D9
1853	pp	P63044 (pp) P60766
4059	pp	Q01097 (pp) P68369
2156	pp	Q9CQR4 (pp) Q9D6J6
2958	pp	Q9CPP6 (pp) Q9DCJ5
1640	pp	P97450 (pp) Q9DCX2
1012	pp	Q62261 (pp) P63101
3615	pp	Q9DCT2 (pp) Q91WD5
3481	pp	Q9D6R2 (pp) P16054
2174	pp	P62073 (pp) Q925I1
1005	pp	P48453 (pp) P63101
1399	pp	P56382 (pp) Q9DCX2
2997	pp	Q9DCW4 (pp) Q06185
2393	pp	P97807 (pp) Q99LC5
2884	pp	P50516 (pp) P46660
1506	pp	Q9CQ92 (pp) Q6PCP5
3380	pp	Q8BH95 (pp) P51174
1002	pp	Q4ACU6 (pp) Q8BYM5
3143	pp	Q9CQJ8 (pp) Q9DB20
2192	pp	Q60631 (pp) P18052
2670	pp	P12787 (pp) Q9DCT2
3917	pp	Q9D051 (pp) Q9DB77
2809	pp	Q9Z1P6 (pp) Q9DC69
1457	pp	Q9Z2I9 (pp) Q91VD9
2191	pp	Q60631 (pp) P04925
3253	pp	P56480 (pp) Q06185
3379	pp	Q8BH95 (pp) P50544
1941	pp	Q9CQ75 (pp) Q9CQC7
2130	pp	O35658 (pp) P40630
999	pp	Q9CS84 (pp) Q8BYM5
3332	pp	Q9D0M3 (pp) P97450
3764	pp	Q9CZU6 (pp) P08249
2921	pp	P31938 (pp) P35438
3614	pp	Q9DCT2 (pp) Q9D6J5
3331	pp	Q9D0M3 (pp) Q06185
996	pp	O08539 (pp) P10637
2734	pp	Q9CQA3 (pp) Q99KI0
2902	pp	P57746 (pp) Q9CQZ6
991	pp	Q64332 (pp) P60761
2808	pp	Q9Z1P6 (pp) Q9CPQ8
986	pp	P00493 (pp) Q99LC5
2843	pp	P17751 (pp) Q9CZ13
3916	pp	Q9D051 (pp) P63101
1733	pp	O88696 (pp) P63038
979	pp	Q9Z0R4 (pp) P39053
4058	pp	Q01097 (pp) P47757
3763	pp	Q9CZU6 (pp) Q91VR2
3884	pp	Q03265 (pp) Q9DCX2
977	pp	Q80Y14 (pp) P99029
2733	pp	Q9CQA3 (pp) Q9CQ62
2996	pp	Q9DCW4 (pp) O09111
1443	pp	P63040 (pp) P63044
1341	pp	Q9D6J5 (pp) Q9Z1P6
973	pp	Q5SQX6 (pp) P28660
2759	pp	Q921G7 (pp) Q9D6J6
3462	pp	Q9DB20 (pp) P99029
3433	pp	Q9CQH3 (pp) Q9D6J6
2145	pp	P40142 (pp) P16858
3357	pp	Q9CZ13 (pp) Q8K1Z0
972	pp	Q9CPQ1 (pp) Q9ERS2
3883	pp	Q03265 (pp) Q91VD9
946	pp	Q3UHL1 (pp) P63101
1384	pp	Q61879 (pp) P35438
944	pp	Q60932 (pp) Q99LX0
2883	pp	P50516 (pp) Q9QYR6
3219	pp	Q91VR2 (pp) O09111
936	pp	B9EKR1 (pp) O54991
3398	pp	P63038 (pp) P15105
1940	pp	Q9CQ75 (pp) Q9CQ54
2360	pp	Q02248 (pp) P35438
3100	pp	Q06185 (pp) Q9DCJ5
1639	pp	P97450 (pp) Q91VR2
3945	pp	O08749 (pp) Q9Z2I9
2488	pp	P56391 (pp) Q9ERS2
1398	pp	P56382 (pp) Q99LX0
1418	pp	Q9EP69 (pp) Q68FD5
2249	pp	Q8VEM8 (pp) Q9D3D9
2451	pp	Q91Z53 (pp) P45376
4057	pp	Q01097 (pp) P05063
3209	pp	Q91VD9 (pp) Q99LC5
3461	pp	Q9DB20 (pp) Q9CQ69
933	pp	Q62419 (pp) Q7TQF7
1063	pp	O70589 (pp) P60469
1732	pp	O88696 (pp) Q9D6J6
2732	pp	Q9CQA3 (pp) Q9DB20
3944	pp	O08749 (pp) Q9WUM5
2620	pp	Q99LC5 (pp) Q91ZJ5
2095	pp	Q9DCX2 (pp) Q99LX0
1382	pp	P63101 (pp) P63328
3853	pp	P68510 (pp) Q9D8B3
3099	pp	Q06185 (pp) Q9CQ69
3378	pp	Q8BH95 (pp) Q9JHI5
4056	pp	Q01097 (pp) P20357
1819	pp	Q9D855 (pp) P97807
3223	pp	Q9JLJ2 (pp) Q61425
971	pp	Q9CPQ1 (pp) Q91VR2
3762	pp	Q9CZU6 (pp) P97807
2340	pp	Q91WD5 (pp) Q8VEM8
2669	pp	P12787 (pp) P56391
4055	pp	Q01097 (pp) P31938
2807	pp	Q9Z1P6 (pp) Q99LX0
916	pp	Q3UVX5 (pp) P04925
3984	pp	Q9CQZ5 (pp) Q91YT0
3530	pp	P08249 (pp) P97807
1884	pp	Q9CXZ1 (pp) Q9CQZ6
913	pp	Q91WC3 (pp) P50516
2731	pp	Q9CQA3 (pp) Q9D855
2072	pp	P19536 (pp) Q9CR68
1818	pp	Q9D855 (pp) Q9DCS9
1189	pp	Q91ZX7 (pp) P12023
1817	pp	Q9D855 (pp) Q9D023
912	pp	Q8BWF0 (pp) Q60597
908	pp	Q8BH04 (pp) Q05920
2124	pp	Q7TMF3 (pp) Q9CQ54
1492	pp	Q9JHI5 (pp) Q99MR8
3356	pp	Q9CZ13 (pp) Q60597
1397	pp	P56382 (pp) Q9DB20
1741	pp	Q9CQQ7 (pp) Q91VR2
1658	pp	P20108 (pp) Q99LC5
1296	pp	Q9CQC7 (pp) Q9CQZ6
3882	pp	Q03265 (pp) Q9CZ13
1295	pp	Q9CQC7 (pp) Q9DCJ5
2438	pp	Q99KI0 (pp) P54071
1904	pp	P51174 (pp) Q61425
1939	pp	Q9CQ75 (pp) Q9DCJ5
1964	pp	P04925 (pp) Q99PJ0
1816	pp	Q9D855 (pp) Q9CQZ6
2752	pp	Q8BWT1 (pp) Q9DBL1
2160	pp	Q9CQV8 (pp) Q64010
1340	pp	Q9D6J5 (pp) Q9CQH3
3460	pp	Q9DB20 (pp) Q9CR68
1404	pp	P09103 (pp) P63038
3613	pp	Q9DCT2 (pp) P56391
1563	pp	P16054 (pp) Q8BMS1
2229	pp	P52503 (pp) Q9CZ13
2881	pp	P50516 (pp) P28660
1857	pp	P63001 (pp) P60766
3252	pp	P56480 (pp) Q99LX0
1211	pp	Q8BGD5 (pp) P50544
1011	pp	Q62261 (pp) P35438
1159	pp	Q9DBG3 (pp) O70161
1109	pp	Q60598 (pp) P05480
2123	pp	Q7TMF3 (pp) Q9DC69
1740	pp	Q9CQQ7 (pp) Q3UIU2
2668	pp	P12787 (pp) Q9ERS2
2633	pp	Q61425 (pp) Q8BMS1
3852	pp	P68510 (pp) Q9CQ92
3208	pp	Q91VD9 (pp) Q8K3J1
1240	pp	P07901 (pp) P62259
2730	pp	Q9CQA3 (pp) P97807
1260	pp	Q8CHT0 (pp) P15105
3423	pp	P19783 (pp) P19536
4054	pp	Q01097 (pp) P16054
1795	pp	Q8K3J1 (pp) Q3UIU2
3761	pp	Q9CZU6 (pp) P06151
2667	pp	P12787 (pp) P19783
1339	pp	Q9D6J5 (pp) Q99LX0
3760	pp	Q9CZU6 (pp) Q8K2B3
1247	pp	P15116 (pp) P35438
2842	pp	P17751 (pp) Q9D6J6
3459	pp	Q9DB20 (pp) P97807
3397	pp	P63038 (pp) Q9WUM5
1108	pp	Q60598 (pp) Q80Z38
4053	pp	Q01097 (pp) P51863
1782	pp	Q9DB77 (pp) Q91YT0
1456	pp	Q9Z2I9 (pp) Q8CAQ8
1545	pp	P09671 (pp) Q9CPP6
1781	pp	Q9DB77 (pp) Q9DC69
3422	pp	P19783 (pp) Q9D3D9
1195	pp	Q8R0S4 (pp) Q9D6F9
2729	pp	Q9CQA3 (pp) P70404
1780	pp	Q9DB77 (pp) Q9WUM5
3169	pp	Q9CR68 (pp) Q9DCJ5
2054	pp	Q68FD5 (pp) Q01097
1487	pp	Q93092 (pp) P06151
3612	pp	Q9DCT2 (pp) Q9ERS2
2339	pp	Q91WD5 (pp) Q9D0M3
3480	pp	Q9D6R2 (pp) Q8BWF0
2247	pp	Q3ULD5 (pp) Q99MN9
2880	pp	P50516 (pp) Q9D6R2
2619	pp	Q99LC5 (pp) Q9CQH3
1956	pp	P39688 (pp) P18052
904	pp	P41216 (pp) Q99JY0
3529	pp	P08249 (pp) Q64521
1448	pp	P50544 (pp) P41216
1319	pp	Q00612 (pp) P40142
1085	pp	Q8QZT1 (pp) Q9D2G2
3458	pp	Q9DB20 (pp) Q9CZ13
3457	pp	Q9DB20 (pp) Q9D6J6
1042	pp	P28652 (pp) P23819
1638	pp	P97450 (pp) O35658
3759	pp	Q9CZU6 (pp) Q99KI0
4052	pp	Q01097 (pp) P16858
902	pp	P68181 (pp) P12367
1815	pp	Q9D855 (pp) Q06185
3183	pp	Q9DCS9 (pp) Q9D3D9
3152	pp	P05132 (pp) P12367
3011	pp	Q9CQN1 (pp) Q8K3J1
3207	pp	Q91VD9 (pp) Q9Z1P6
3611	pp	Q9DCT2 (pp) Q03265
3943	pp	O08749 (pp) Q60597
3330	pp	Q9D0M3 (pp) Q9WUM5
1226	pp	P05063 (pp) P17710
2819	pp	P09411 (pp) Q9DCD0
2338	pp	Q91WD5 (pp) Q99KI0
3377	pp	Q8BH95 (pp) Q8BMS1
2806	pp	Q9Z1P6 (pp) Q9CQ69
1814	pp	Q9D855 (pp) P56391
1447	pp	P50544 (pp) Q91WC3
2916	pp	P17427 (pp) Q80VP1
1486	pp	Q93092 (pp) Q9DCD0
1414	pp	P43024 (pp) Q9CQ69
3168	pp	Q9CR68 (pp) Q9WUM5
2028	pp	Q91YT0 (pp) Q9DCX2
2841	pp	P17751 (pp) P56480
1850	pp	P63044 (pp) Q6PIC6
3421	pp	P19783 (pp) Q91YT0
970	pp	Q9CPQ1 (pp) Q06185
1223	pp	Q8BKZ9 (pp) Q8BMF4
2337	pp	Q91WD5 (pp) Q99JY0
990	pp	Q64332 (pp) P62259
3182	pp	Q9DCS9 (pp) Q9DCX2
2228	pp	P52503 (pp) Q91VD9
2336	pp	Q91WD5 (pp) Q91VR2
899	pp	Q80VP1 (pp) Q9Z0R4
985	pp	P00493 (pp) Q9R111
3983	pp	Q9CQZ5 (pp) Q9CQ69
1712	pp	O35129 (pp) P62073
1696	pp	P56379 (pp) Q06185
3732	pp	Q9DCD0 (pp) Q9D0F9
3915	pp	Q9D051 (pp) Q9CQQ7
1294	pp	Q9CQC7 (pp) Q9CQH3
2227	pp	P52503 (pp) Q9CQZ5
2280	pp	Q8K2B3 (pp) Q9CQQ7
1677	pp	P63017 (pp) P63038
3206	pp	Q91VD9 (pp) Q8BMF4
1381	pp	P63101 (pp) Q62465
1779	pp	Q9DB77 (pp) Q9CQ69
3329	pp	Q9D0M3 (pp) Q91VD9
3420	pp	P19783 (pp) Q06185
894	pp	Q9WUB3 (pp) Q91ZJ5
1883	pp	Q9CXZ1 (pp) Q9DB77
3851	pp	P68510 (pp) Q91VZ6
1544	pp	P09671 (pp) Q9D2G2
1268	pp	P31324 (pp) P20357
890	pp	Q8CHC4 (pp) Q62420
3610	pp	Q9DCT2 (pp) Q8BGH2
888	pp	Q61411 (pp) P35438
3982	pp	Q9CQZ5 (pp) Q99LC5
3758	pp	Q9CZU6 (pp) Q8BWT1
2238	pp	Q8R4N0 (pp) Q91ZA3
969	pp	Q9CPQ1 (pp) P19783
3222	pp	Q9JLJ2 (pp) Q8CHT0
3142	pp	Q9CQJ8 (pp) Q9CQ69
2580	pp	P11499 (pp) P63038
3549	pp	Q9CQ69 (pp) Q9DC69
1794	pp	Q8K3J1 (pp) Q99LX0
1207	pp	P42125 (pp) O09111
1778	pp	Q9DB77 (pp) P68510
2009	pp	Q9DCJ5 (pp) Q3UIU2
1543	pp	P09671 (pp) P06745
1184	pp	Q6R891 (pp) Q60875
1434	pp	P06745 (pp) O55023
1045	pp	Q9R0Y5 (pp) Q9DCD0
4051	pp	Q01097 (pp) P06151
2279	pp	Q8K2B3 (pp) Q99KI0
3528	pp	P08249 (pp) Q60931
884	pp	Q80UU9 (pp) P68510
883	pp	Q9R0P9 (pp) P68369
1755	pp	Q9DC69 (pp) Q9CQQ7
2392	pp	P97807 (pp) Q9DC69
1542	pp	P09671 (pp) P99029
3419	pp	P19783 (pp) Q91VR2
2122	pp	Q7TMF3 (pp) Q62425
3141	pp	Q9CQJ8 (pp) Q9DCJ5
3167	pp	Q9CR68 (pp) Q9ERS2
1882	pp	Q9CXZ1 (pp) P97450
1107	pp	Q60598 (pp) Q9CVB6
880	pp	P0C0A3 (pp) Q9WU78
874	pp	P50396 (pp) P62821
1637	pp	P97450 (pp) Q9D6J6
2437	pp	Q99KI0 (pp) P47857
2585	pp	Q8K1Z0 (pp) Q9WUM5
1777	pp	Q9DB77 (pp) P19783
2995	pp	Q9DCW4 (pp) Q9D6J5
1938	pp	Q9CQ75 (pp) Q99LY9
869	pp	Q9CRB9 (pp) P16054
868	pp	P35279 (pp) Q61598
3981	pp	Q9CQZ5 (pp) P99029
2155	pp	Q9CQR4 (pp) Q9DCD0
4050	pp	Q01097 (pp) P60879
2436	pp	Q99KI0 (pp) P52480
3140	pp	Q9CQJ8 (pp) P48771
1597	pp	Q99MN9 (pp) Q9WUM5
3328	pp	Q9D0M3 (pp) P17751
873	pp	P50396 (pp) P07901
3609	pp	Q9DCT2 (pp) Q9CQC7
1837	pp	Q9JHU4 (pp) Q9DC28
2666	pp	P12787 (pp) Q9CQQ7
3327	pp	Q9D0M3 (pp) Q9DB77
3608	pp	Q9DCT2 (pp) Q9WUM5
886	pp	Q60875 (pp) Q8BG51
2246	pp	Q3ULD5 (pp) Q9JHI5
2053	pp	Q68FD5 (pp) Q8CHC4
3166	pp	Q9CR68 (pp) Q9D3D9
2758	pp	Q921G7 (pp) Q99JY0
2901	pp	P57746 (pp) P97450
1084	pp	Q8QZT1 (pp) Q9WUM5
3293	pp	Q99LC3 (pp) P50516
3607	pp	Q9DCT2 (pp) Q9CQJ8
3527	pp	P08249 (pp) Q8BGH2
2121	pp	Q7TMF3 (pp) Q9D0M3
2120	pp	Q7TMF3 (pp) P97450
3812	pp	P35438 (pp) Q6PIC6
3757	pp	Q9CZU6 (pp) Q91WD5
3850	pp	P68510 (pp) Q8VBV7
1501	pp	P53395 (pp) Q9WUM5
3895	pp	Q9D3D9 (pp) Q9ERS2
1636	pp	P97450 (pp) Q60931
1293	pp	Q9CQC7 (pp) Q8K3J1
2857	pp	P70404 (pp) Q9WUM5
2728	pp	Q9CQA3 (pp) Q9CPQ1
2632	pp	Q61425 (pp) Q9CQ62
1115	pp	P38647 (pp) Q8JZQ2
867	pp	Q60605 (pp) Q01097
2840	pp	P17751 (pp) Q91VD9
3080	pp	Q9DC70 (pp) P97450
1338	pp	Q9D6J5 (pp) Q8K3J1
930	pp	P63328 (pp) P22723
3526	pp	P08249 (pp) Q9D051
1541	pp	P09671 (pp) Q9CQQ7
3756	pp	Q9CZU6 (pp) Q91YT0
4049	pp	Q01097 (pp) O88952
1848	pp	P63044 (pp) Q99LX0
2957	pp	Q9CPP6 (pp) Q99LY9
2757	pp	Q921G7 (pp) Q9WUM5
3881	pp	Q03265 (pp) P97807
1010	pp	Q62261 (pp) Q01097
3606	pp	Q9DCT2 (pp) Q9CXZ1
3428	pp	O88952 (pp) P60469
1485	pp	Q93092 (pp) P17182
3849	pp	P68510 (pp) P08249
2159	pp	Q9CQV8 (pp) P10637
3980	pp	Q9CQZ5 (pp) Q9CPQ8
3605	pp	Q9DCT2 (pp) Q99LC5
4048	pp	Q01097 (pp) P05480
3811	pp	P35438 (pp) Q60631
2852	pp	O88441 (pp) Q9CQH3
3755	pp	Q9CZU6 (pp) Q03265
3326	pp	Q9D0M3 (pp) P19536
3810	pp	P35438 (pp) P68033
3942	pp	O08749 (pp) Q9D6J6
2789	pp	P48771 (pp) Q9DC69
3098	pp	Q06185 (pp) O09111
3880	pp	Q03265 (pp) P16054
3251	pp	P56480 (pp) Q9WUM5
4047	pp	Q01097 (pp) P50516
2359	pp	Q02248 (pp) P39688
3008	pp	P63037 (pp) Q91VR2
2435	pp	Q99KI0 (pp) Q05920
1403	pp	P09103 (pp) P04925
2481	pp	Q9D172 (pp) Q9CQZ5
1937	pp	Q9CQ75 (pp) Q9CQZ6
1396	pp	P56382 (pp) Q9CQQ7
1684	pp	Q9D023 (pp) Q9D6J6
2879	pp	P50516 (pp) P47754
3215	pp	Q9CPQ8 (pp) Q9D6J6
2756	pp	Q921G7 (pp) Q80U28
3848	pp	P68510 (pp) Q61553
2727	pp	Q9CQA3 (pp) Q9CQH3
1676	pp	P63017 (pp) P11499
1936	pp	Q9CQ75 (pp) Q9DCX2
2878	pp	P50516 (pp) Q5SQX6
2434	pp	Q99KI0 (pp) Q9D3D9
3525	pp	P08249 (pp) Q9D855
2550	pp	P12023 (pp) Q810U3
3604	pp	Q9DCT2 (pp) Q99LY9
2726	pp	Q9CQA3 (pp) P52503
2994	pp	Q9DCW4 (pp) Q91YT0
906	pp	Q99MR8 (pp) Q99MN9
1254	pp	Q7TQF7 (pp) Q9EP69
3771	pp	P35436 (pp) P35438
2391	pp	P97807 (pp) Q60597
901	pp	P68181 (pp) P35438
3181	pp	Q9DCS9 (pp) Q9D6J6
3847	pp	P68510 (pp) P67871
2725	pp	Q9CQA3 (pp) Q9DC69
3250	pp	P56480 (pp) P17156
1793	pp	Q8K3J1 (pp) O09111
2278	pp	Q8K2B3 (pp) P09411
3914	pp	Q9D051 (pp) P52480
2549	pp	P12023 (pp) P62259
3667	pp	Q9CQZ6 (pp) Q06185
879	pp	P0C0A3 (pp) Q9D8B3
1222	pp	Q8BKZ9 (pp) P35486
945	pp	Q3UHL1 (pp) P60761
1935	pp	Q9CQ75 (pp) Q9CQ69
2993	pp	Q9DCW4 (pp) Q9ERS2
3418	pp	P19783 (pp) Q9ERS2
863	pp	Q8R3V5 (pp) Q8CHC4
3603	pp	Q9DCT2 (pp) Q7TMF3
1253	pp	Q7TQF7 (pp) Q8CHC4
862	pp	P58281 (pp) Q8K1M6
3079	pp	Q9DC70 (pp) Q99LC3
1206	pp	P42125 (pp) Q61425
3979	pp	Q9CQZ5 (pp) Q9CQC7
2665	pp	P12787 (pp) Q9D6J6
2256	pp	P68369 (pp) P27546
4046	pp	Q01097 (pp) P63318
3819	pp	P12382 (pp) Q93092
1072	pp	P62746 (pp) Q5FWK3
2839	pp	P17751 (pp) P70296
3097	pp	Q06185 (pp) Q8K3J1
1596	pp	Q99MN9 (pp) Q8BWT1
2119	pp	Q7TMF3 (pp) P52503
1934	pp	Q9CQ75 (pp) P56391
2779	pp	Q64133 (pp) Q9JLJ2
2027	pp	Q91YT0 (pp) Q9CQQ7
860	pp	P56564 (pp) P63101
2992	pp	Q9DCW4 (pp) Q8BMS1
2335	pp	Q91WD5 (pp) Q9CQ69
1500	pp	P53395 (pp) P35486
3602	pp	Q9DCT2 (pp) Q9CR68
2433	pp	Q99KI0 (pp) P70404
3355	pp	Q9CZ13 (pp) Q9CQ69
3524	pp	P08249 (pp) Q8K2B3
1776	pp	Q9DB77 (pp) Q99LC5
1540	pp	P09671 (pp) O70325
976	pp	Q80Y14 (pp) Q9DCB8
1775	pp	Q9DB77 (pp) Q91VR2
1215	pp	P17182 (pp) P63101
3165	pp	Q9CR68 (pp) P00405
1813	pp	Q9D855 (pp) Q9CPP6
1774	pp	Q9DB77 (pp) Q99JY0
3523	pp	P08249 (pp) P05202
1933	pp	Q9CQ75 (pp) Q9Z1P6
3456	pp	Q9DB20 (pp) P19783
856	pp	Q9EPJ9 (pp) P62331
2470	pp	P26443 (pp) P97807
2618	pp	Q99LC5 (pp) Q80U28
3047	pp	Q9D0S9 (pp) Q91Z53
1292	pp	Q9CQC7 (pp) Q9D6J5
3846	pp	P68510 (pp) O55042
1041	pp	P28652 (pp) P35436
2877	pp	P50516 (pp) Q5DQR4
2277	pp	Q8K2B3 (pp) Q91YT0
3978	pp	Q9CQZ5 (pp) Q3UIU2
1903	pp	P51174 (pp) P41216
1972	pp	O08756 (pp) O09111
2276	pp	Q8K2B3 (pp) Q9Z2I9
1635	pp	P97450 (pp) Q9D3D9
3226	pp	P67778 (pp) P50516
1652	pp	Q64010 (pp) P61982
855	pp	O35239 (pp) P46460
2154	pp	Q9CQR4 (pp) Q9CQZ6
1773	pp	Q9DB77 (pp) Q3UIU2
1881	pp	Q9CXZ1 (pp) Q9D6J5
2817	pp	P09411 (pp) P17742
2469	pp	P26443 (pp) P05202
1702	pp	Q9CZS1 (pp) Q8CHT0
1661	pp	Q9QUH0 (pp) P99029
2724	pp	Q9CQA3 (pp) Q9WUM5
1231	pp	P61982 (pp) Q9DC28
3845	pp	P68510 (pp) P10637
3164	pp	Q9CR68 (pp) P56391
1963	pp	P04925 (pp) O88935
2275	pp	Q8K2B3 (pp) P00493
2071	pp	P19536 (pp) Q9D3D9
2991	pp	Q9DCW4 (pp) Q8K3J1
3221	pp	Q9JLJ2 (pp) Q8BW75
1880	pp	Q9CXZ1 (pp) Q9CQH3
2956	pp	Q9CPP6 (pp) Q9ERS2
2050	pp	Q68FD5 (pp) O70589
3354	pp	Q9CZ13 (pp) Q9DCJ5
2664	pp	P12787 (pp) Q9DB20
3078	pp	Q9DC70 (pp) Q99KI0
3754	pp	Q9CZU6 (pp) P52480
2118	pp	Q7TMF3 (pp) Q9D855
1060	pp	P03995 (pp) Q9QXS1
1106	pp	Q60598 (pp) P35438
2955	pp	Q9CPP6 (pp) Q9CQZ6
2432	pp	Q99KI0 (pp) O09111
3205	pp	Q91VD9 (pp) Q9DCJ5
3077	pp	Q9DC70 (pp) P17751
2190	pp	Q60631 (pp) P20444
2237	pp	Q8R4N0 (pp) Q99MR8
3376	pp	Q8BH95 (pp) Q99MN9
1172	pp	P47857 (pp) P63101
3455	pp	Q9DB20 (pp) P56391
3076	pp	Q9DC70 (pp) Q9D0M3
1539	pp	P09671 (pp) Q9CXZ1
4045	pp	Q01097 (pp) P97772
1792	pp	Q8K3J1 (pp) Q9D3D9
984	pp	P00493 (pp) P52480
1380	pp	P63101 (pp) O88935
1444	pp	Q61831 (pp) Q01097
932	pp	Q62419 (pp) P39053
847	pp	Q60930 (pp) Q9CR68
3204	pp	Q91VD9 (pp) Q9CQ54
935	pp	O54991 (pp) Q99P72
3353	pp	Q9CZ13 (pp) Q9Z1P6
923	pp	P20357 (pp) P35438
2117	pp	Q7TMF3 (pp) Q9DC70
3046	pp	Q9D0S9 (pp) O08756
3879	pp	Q03265 (pp) P09411
3522	pp	P08249 (pp) Q9DC70
2226	pp	P52503 (pp) P42125
1562	pp	P16054 (pp) O35643
3396	pp	P63038 (pp) Q9Z0X1
3521	pp	P08249 (pp) Q8BH04
838	pp	Q8R191 (pp) P50516
1455	pp	Q9Z2I9 (pp) Q03265
1665	pp	P13707 (pp) P17751
3151	pp	P05132 (pp) P31324
3753	pp	Q9CZU6 (pp) P09671
1772	pp	Q9DB77 (pp) Q99P72
1739	pp	Q9CQQ7 (pp) Q9D6J6
2225	pp	P52503 (pp) P43024
3601	pp	Q9DCT2 (pp) P42125
3249	pp	P56480 (pp) Q9CZ13
1225	pp	P05063 (pp) Q91VR2
3150	pp	P05132 (pp) P35438
2049	pp	Q68FD5 (pp) Q9Z0R4
3666	pp	Q9CQZ6 (pp) Q9D6J6
3139	pp	Q9CQJ8 (pp) Q9D0M3
1352	pp	Q8VDN2 (pp) P60879
3075	pp	Q9DC70 (pp) Q9DCJ5
1791	pp	Q8K3J1 (pp) Q9ERS2
3600	pp	Q9DCT2 (pp) Q9CQZ6
4044	pp	Q01097 (pp) P68404
3645	pp	Q9CQ54 (pp) O09111
3844	pp	P68510 (pp) P61164
3818	pp	P12382 (pp) P63101
4043	pp	Q01097 (pp) O55100
2468	pp	P26443 (pp) P15105
835	pp	Q5RJI5 (pp) P62259
1879	pp	Q9CXZ1 (pp) Q9CQQ7
834	pp	Q8BZ98 (pp) Q61644
1634	pp	P97450 (pp) Q9WUM5
3775	pp	P23819 (pp) P99024
828	pp	P19096 (pp) Q05920
1633	pp	P97450 (pp) O88441
1586	pp	P47754 (pp) P63101
2026	pp	Q91YT0 (pp) Q9CR68
1075	pp	Q8VD37 (pp) P35564
824	pp	Q9CZ42 (pp) P61922
2934	pp	Q08331 (pp) Q01097
2838	pp	P17751 (pp) Q9D2G2
2334	pp	Q91WD5 (pp) Q9D855
3281	pp	Q99LY9 (pp) Q9ERS2
4042	pp	Q01097 (pp) Q91VR2
3941	pp	O08749 (pp) Q8BKZ9
3325	pp	Q9D0M3 (pp) Q91VR2
823	pp	Q61490 (pp) P01831
3683	pp	Q76MZ3 (pp) P63101
1731	pp	O88696 (pp) Q9D3D9
2775	pp	P47738 (pp) Q8CHT0
2663	pp	P12787 (pp) P00405
2224	pp	P52503 (pp) P62073
1812	pp	Q9D855 (pp) Q9DB77
939	pp	O08585 (pp) Q91VR2
3665	pp	Q9CQZ6 (pp) Q9WUM5
3096	pp	Q06185 (pp) Q91VR2
3352	pp	Q9CZ13 (pp) Q9WUM5
1083	pp	Q8QZT1 (pp) Q99JY0
4041	pp	Q01097 (pp) P35279
1166	pp	P10637 (pp) P04925
3664	pp	Q9CQZ6 (pp) Q62425
1127	pp	Q62425 (pp) Q9DCJ5
1682	pp	P12367 (pp) Q8BR92
1379	pp	P63101 (pp) P46660
2431	pp	Q99KI0 (pp) Q9D6R2
2723	pp	Q9CQA3 (pp) Q9D6J5
1932	pp	Q9CQ75 (pp) Q9D0M3
1205	pp	P42125 (pp) P51174
3682	pp	Q76MZ3 (pp) P35438
3599	pp	Q9DCT2 (pp) P99029
3265	pp	Q61598 (pp) Q91VR2
2505	pp	P62814 (pp) Q9DC69
3023	pp	Q9WUM5 (pp) Q9DCJ5
1538	pp	P09671 (pp) P63038
2236	pp	Q8R4N0 (pp) P05480
3977	pp	Q9CQZ5 (pp) Q9CQQ7
1878	pp	Q9CXZ1 (pp) Q9DCJ5
3793	pp	P05202 (pp) Q60597
1657	pp	P20108 (pp) Q9WUM5
3976	pp	Q9CQZ5 (pp) Q62425
3598	pp	Q9DCT2 (pp) Q9D051
3248	pp	P56480 (pp) P19783
1579	pp	P35486 (pp) Q922H2
1505	pp	Q9CQ92 (pp) Q8BZ98
1378	pp	P63101 (pp) P28740
2990	pp	Q9DCW4 (pp) P08249
3878	pp	Q03265 (pp) Q8K3J1
2390	pp	P97807 (pp) Q05920
2547	pp	P12023 (pp) Q61548
3454	pp	Q9DB20 (pp) Q3UIU2
3597	pp	Q9DCT2 (pp) Q9DC69
822	pp	O35857 (pp) Q9D880
817	pp	P43406 (pp) Q71LX4
1561	pp	P16054 (pp) P48962
815	pp	Q8CI94 (pp) P50516
812	pp	Q8K021 (pp) Q62277
1204	pp	P42125 (pp) Q99LC5
3247	pp	P56480 (pp) P62259
1695	pp	P56379 (pp) Q9Z1P6
4040	pp	Q01097 (pp) P63321
1592	pp	Q99JY9 (pp) Q8VDN2
2989	pp	Q9DCW4 (pp) P17751
2189	pp	Q60631 (pp) P12023
3246	pp	P56480 (pp) P00405
827	pp	P19096 (pp) Q64521
3843	pp	P68510 (pp) Q9R0Q6
2008	pp	Q9DCJ5 (pp) Q9D3D9
843	pp	Q99P72 (pp) P48722
3271	pp	Q05920 (pp) P06151
3809	pp	P35438 (pp) P06837
1377	pp	P63101 (pp) Q925I1
2487	pp	P56391 (pp) P00405
3292	pp	Q99LC3 (pp) O09111
3913	pp	Q9D051 (pp) Q9D6R2
882	pp	Q9R0P9 (pp) Q99LX0
3520	pp	P08249 (pp) P63038
905	pp	Q9D6F9 (pp) P50516
2751	pp	Q8BWT1 (pp) Q9EQ20
1754	pp	Q9DC69 (pp) Q9D3D9
1276	pp	P39053 (pp) P28740
2722	pp	Q9CQA3 (pp) P56391
3519	pp	P08249 (pp) Q9D6J6
4039	pp	Q01097 (pp) P61982
810	pp	O35143 (pp) Q9D3D9
885	pp	Q60875 (pp) P84096
2467	pp	P26443 (pp) Q9D6R2
3663	pp	Q9CQZ6 (pp) Q9ERS2
2430	pp	Q99KI0 (pp) Q9ERS2
2631	pp	Q61425 (pp) Q8BWT1
2603	pp	Q8BGH2 (pp) Q9CZ13
1472	pp	P52480 (pp) Q8BH04
2070	pp	P19536 (pp) P56391
3912	pp	Q9D051 (pp) P40142
3752	pp	Q9CZU6 (pp) Q9D0M3
3427	pp	O88952 (pp) O70589
806	pp	P28661 (pp) P42208
805	pp	Q9WV34 (pp) Q01097
816	pp	P48962 (pp) Q60931
4038	pp	Q01097 (pp) P60710
3074	pp	Q9DC70 (pp) Q9DCX2
804	pp	Q9Z2Q6 (pp) P42208
3245	pp	P56480 (pp) P56391
3138	pp	Q9CQJ8 (pp) Q9D6J6
2480	pp	Q9D172 (pp) Q9DCT2
2617	pp	Q99LC5 (pp) Q91VR2
3264	pp	Q61598 (pp) P63011
3596	pp	Q9DCT2 (pp) Q9D855
2245	pp	Q3ULD5 (pp) Q921G7
1931	pp	Q9CQ75 (pp) Q9CQH3
2875	pp	P50516 (pp) Q9Z2I0
2988	pp	Q9DCW4 (pp) Q91Z53
896	pp	Q9D0F9 (pp) P17710
2837	pp	P17751 (pp) Q64521
1069	pp	P13595 (pp) Q9CQV8
2244	pp	Q3ULD5 (pp) Q8BMS1
2769	pp	P63005 (pp) P20357
3548	pp	Q9CQ69 (pp) Q9ERS2
2025	pp	Q91YT0 (pp) Q60597
3518	pp	P08249 (pp) Q9CQC7
801	pp	O54983 (pp) Q8VDQ8
2429	pp	Q99KI0 (pp) Q91YT0
2373	pp	Q6PHZ2 (pp) P35436
2153	pp	Q9CQR4 (pp) Q9CQZ5
1499	pp	P53395 (pp) Q8K2B3
3644	pp	Q9CQ54 (pp) Q9DC69
1811	pp	Q9D855 (pp) Q9DC69
2874	pp	P50516 (pp) Q62425
3808	pp	P35438 (pp) P68368
2933	pp	Q9CQ62 (pp) Q99JY0
2116	pp	Q7TMF3 (pp) Q9DCS9
3417	pp	P19783 (pp) P17665
2367	pp	P60710 (pp) P35438
2115	pp	Q7TMF3 (pp) Q9CQZ5
1771	pp	Q9DB77 (pp) O09111
968	pp	Q9CPQ1 (pp) Q03265
2569	pp	P48320 (pp) P15105
2333	pp	Q91WD5 (pp) Q9CQH3
2332	pp	Q91WD5 (pp) Q9DC70
3517	pp	P08249 (pp) Q9CR68
1711	pp	O35129 (pp) Q8BGH2
797	pp	Q8K4Z3 (pp) Q9Z1P6
1537	pp	P09671 (pp) Q9DC70
893	pp	Q9WUB3 (pp) Q9D0F9
1651	pp	Q64010 (pp) P68254
3516	pp	P08249 (pp) Q9DB77
2007	pp	Q9DCJ5 (pp) Q9DC69
4037	pp	Q01097 (pp) P08553
800	pp	Q8VDQ8 (pp) Q9DC69
1183	pp	Q6R891 (pp) P63101
2114	pp	Q7TMF3 (pp) Q9CQQ7
2274	pp	Q8K2B3 (pp) Q60597
1632	pp	P97450 (pp) Q99LC5
3877	pp	Q03265 (pp) Q99LC5
2223	pp	P52503 (pp) Q9DC69
2792	pp	O70325 (pp) Q9D3D9
3807	pp	P35438 (pp) P62259
2358	pp	Q02248 (pp) P68510
1068	pp	P13595 (pp) P04925
2662	pp	P12787 (pp) Q9CQZ5
2389	pp	P97807 (pp) Q91VR2
929	pp	P63328 (pp) P35438
793	pp	Q61699 (pp) P68369
2331	pp	Q91WD5 (pp) P97807
3244	pp	P56480 (pp) P15105
792	pp	P12960 (pp) B9EKR1
3842	pp	P68510 (pp) P63101
1082	pp	Q8QZT1 (pp) O08756
2428	pp	Q99KI0 (pp) Q9CR68
821	pp	O35857 (pp) P38647
3704	pp	P62259 (pp) Q9QWI6
2579	pp	P11499 (pp) P63037
2182	pp	Q62277 (pp) P62204
3137	pp	Q9CQJ8 (pp) Q9CQ54
1413	pp	P43024 (pp) Q91VR2
2427	pp	Q99KI0 (pp) P06745
3751	pp	Q9CZU6 (pp) Q9CQA3
3351	pp	Q9CZ13 (pp) P19783
1631	pp	P97450 (pp) Q9D6J5
2661	pp	P12787 (pp) Q9DCJ5
1376	pp	P63101 (pp) Q7TSJ2
1969	pp	Q99JY0 (pp) Q9DBL1
1307	pp	Q9CVB6 (pp) P67871
983	pp	P00493 (pp) P17742
789	pp	O35136 (pp) P11627
1337	pp	Q9D6J5 (pp) Q9D6J6
1513	pp	Q8BPN8 (pp) P28660
1336	pp	Q9D6J5 (pp) Q9CZ13
3275	pp	Q8BMF4 (pp) P63101
4036	pp	Q01097 (pp) P62204
788	pp	O55131 (pp) P42208
1132	pp	Q8BMF3 (pp) P06151
1930	pp	Q9CQ75 (pp) Q62425
1252	pp	Q7TQF7 (pp) P39053
2721	pp	Q9CQA3 (pp) Q9DB77
3291	pp	Q99LC3 (pp) Q9D6J6
3324	pp	Q9D0M3 (pp) P50516
3453	pp	Q9DB20 (pp) Q9DC69
2426	pp	Q99KI0 (pp) Q9DB20
3203	pp	Q91VD9 (pp) Q9CQQ7
3136	pp	Q9CQJ8 (pp) P97450
3290	pp	Q99LC3 (pp) Q9CQH3
2069	pp	P19536 (pp) Q9CQ69
787	pp	Q9WV55 (pp) P63044
3940	pp	O08749 (pp) Q8BMF4
3073	pp	Q9DC70 (pp) Q9D855
2388	pp	P97807 (pp) Q91YT0
3595	pp	Q9DCT2 (pp) Q9DCX2
3594	pp	Q9DCT2 (pp) Q9CQR4
2954	pp	Q9CPP6 (pp) Q91VD9
1395	pp	P56382 (pp) P03930
2630	pp	Q61425 (pp) Q99JY0
2987	pp	Q9DCW4 (pp) Q9WUM5
2222	pp	P52503 (pp) Q8K3J1
1560	pp	P16054 (pp) P63038
1841	pp	P46660 (pp) P35438
2660	pp	P12787 (pp) Q9D0M3
3975	pp	Q9CQZ5 (pp) Q9CR68
2616	pp	Q99LC5 (pp) Q9DBL1
3593	pp	Q9DCT2 (pp) Q9DCJ5
2720	pp	Q9CQA3 (pp) Q9CQ75
2221	pp	P52503 (pp) Q9CQQ7
2152	pp	Q9CQR4 (pp) Q9DCJ5
3592	pp	Q9DCT2 (pp) P09671
2546	pp	P12023 (pp) Q60932
1595	pp	Q99MN9 (pp) Q99JY0
1770	pp	Q9DB77 (pp) Q9CR68
1028	pp	Q9DBJ1 (pp) Q99K85
3072	pp	Q9DC70 (pp) Q9DB20
3071	pp	Q9DC70 (pp) Q3UIU2
2273	pp	Q8K2B3 (pp) P56480
1897	pp	Q8JZQ2 (pp) Q68FF6
1181	pp	P60766 (pp) Q99PT1
2352	pp	P05480 (pp) P35438
3452	pp	Q9DB20 (pp) Q9CQQ7
2220	pp	P52503 (pp) Q9CQJ8
2144	pp	P40142 (pp) Q60597
1512	pp	Q8BPN8 (pp) Q9WUA3
3451	pp	Q9DB20 (pp) P62073
3395	pp	P63038 (pp) Q6PB66
2795	pp	P62812 (pp) P63328
3243	pp	P56480 (pp) O35143
3995	pp	Q80Z38 (pp) Q8BYM5
3750	pp	Q9CZU6 (pp) Q99JY0
943	pp	Q60932 (pp) P17710
967	pp	Q9CPQ1 (pp) Q9D6J6
1230	pp	P61982 (pp) P10637
1962	pp	P04925 (pp) P63101
3591	pp	Q9DCT2 (pp) P56480
3643	pp	Q9CQ54 (pp) Q9CQQ7
2788	pp	P48771 (pp) Q91VR2
3070	pp	Q9DC70 (pp) Q9CR68
3590	pp	Q9DCT2 (pp) Q8K2B3
3774	pp	P23819 (pp) O08599
3202	pp	Q91VD9 (pp) P97807
3731	pp	Q9DCD0 (pp) Q8BMS1
1810	pp	Q9D855 (pp) Q9DB20
3515	pp	P08249 (pp) P09411
3792	pp	P05202 (pp) Q05920
1730	pp	O88696 (pp) Q9DC70
3394	pp	P63038 (pp) Q8BIJ6
3350	pp	Q9CZ13 (pp) Q9D6J6
1729	pp	O88696 (pp) Q8BGH2
2094	pp	Q9DCX2 (pp) Q91VR2
2787	pp	P48771 (pp) P56391
2024	pp	Q91YT0 (pp) Q9ERS2
775	pp	P55302 (pp) Q91ZX7
2928	pp	Q9D2G2 (pp) Q91VR2
3514	pp	P08249 (pp) Q9DC69
1432	pp	P06745 (pp) Q9DCD0
1105	pp	Q60598 (pp) Q01097
1461	pp	Q61301 (pp) P15116
995	pp	O08539 (pp) Q8R3V5
3876	pp	Q03265 (pp) Q9R0Y5
1984	pp	P60879 (pp) Q9QWI6
3875	pp	Q03265 (pp) Q91VR2
3974	pp	Q9CQZ5 (pp) Q9CZ13
3749	pp	Q9CZU6 (pp) Q8BMF4
2219	pp	P52503 (pp) Q9CQH3
1809	pp	Q9D855 (pp) Q9CR68
3393	pp	P63038 (pp) P63037
2006	pp	Q9DCJ5 (pp) Q9CQQ7
1431	pp	P06745 (pp) Q9D0F9
2986	pp	Q9DCW4 (pp) P42125
3589	pp	Q9DCT2 (pp) Q9CQ75
1251	pp	Q7TQF7 (pp) Q9DBG3
3662	pp	Q9CQZ6 (pp) Q8K3J1
1065	pp	Q8BKX1 (pp) P28660
3642	pp	Q9CQ54 (pp) Q9DCJ5
4035	pp	Q01097 (pp) Q61411
3135	pp	Q9CQJ8 (pp) Q9CZ13
2113	pp	Q7TMF3 (pp) Q9Z1P6
2173	pp	P62073 (pp) Q9DCJ5
3323	pp	Q9D0M3 (pp) Q9DCX2
3679	pp	Q76MZ3 (pp) P50396
2755	pp	Q921G7 (pp) Q9CQ62
3911	pp	Q9D051 (pp) P16054
774	pp	Q91XV3 (pp) P68510
2898	pp	P57746 (pp) P23506
770	pp	P48758 (pp) P62259
1877	pp	Q9CXZ1 (pp) Q99LY9
2063	pp	Q60864 (pp) P63037
1876	pp	Q9CXZ1 (pp) Q9CR68
2659	pp	P12787 (pp) Q9D6J5
2387	pp	P97807 (pp) Q8K3J1
3069	pp	Q9DC70 (pp) Q91YT0
1491	pp	Q9JHI5 (pp) Q61425
769	pp	Q9R1V6 (pp) Q01097
978	pp	Q9Z0R4 (pp) P50516
3806	pp	P35438 (pp) O55100
2856	pp	P70404 (pp) Q9DC69
3039	pp	Q9D1K2 (pp) Q9CQZ5
3910	pp	Q9D051 (pp) P06151
1081	pp	Q8QZT1 (pp) Q9D0K2
3874	pp	Q03265 (pp) Q91YT0
1753	pp	Q9DC69 (pp) P99029
2330	pp	Q91WD5 (pp) Q9CQQ7
3479	pp	Q9D6R2 (pp) Q91VR2
1375	pp	P63101 (pp) P28652
1808	pp	Q9D855 (pp) Q99LY9
1710	pp	O35129 (pp) Q9CZ13
1203	pp	P42125 (pp) Q9DCJ5
3134	pp	Q9CQJ8 (pp) P97807
3873	pp	Q03265 (pp) Q9WUM5
3201	pp	Q91VD9 (pp) Q9DB77
3909	pp	Q9D051 (pp) P97450
2005	pp	Q9DCJ5 (pp) Q9ERS2
3547	pp	Q9CQ69 (pp) Q9D3D9
767	pp	Q9QY76 (pp) P61264
3805	pp	P35438 (pp) P57780
1023	pp	P23818 (pp) P35438
3375	pp	Q8BH95 (pp) O08756
1239	pp	P07901 (pp) Q9CR16
2172	pp	P62073 (pp) P56391
3513	pp	P08249 (pp) Q8K3J1
966	pp	Q9CPQ1 (pp) Q9DCX2
3973	pp	Q9CQZ5 (pp) Q9DC69
2602	pp	Q8BGH2 (pp) Q9DC69
3133	pp	Q9CQJ8 (pp) Q9D023
934	pp	P45376 (pp) P16054
1738	pp	Q9CQQ7 (pp) Q9ERS2
1088	pp	Q60931 (pp) Q9D6J6
1602	pp	Q99PT1 (pp) P62746
1650	pp	Q64010 (pp) P68510
2805	pp	Q9Z1P6 (pp) Q9CQH3
2985	pp	Q9DCW4 (pp) Q9DBL1
761	pp	Q8K183 (pp) P63330
2386	pp	P97807 (pp) P06151
1875	pp	Q9CXZ1 (pp) Q91YT0
965	pp	Q9CPQ1 (pp) Q9CQ69
3242	pp	P56480 (pp) Q99LC3
1387	pp	Q91ZA3 (pp) Q9EQ20
1291	pp	Q9CQC7 (pp) Q99LY9
3132	pp	Q9CQJ8 (pp) Q9CQZ6
2872	pp	P50516 (pp) O08539
2004	pp	Q9DCJ5 (pp) Q9CPQ8
1019	pp	Q68FF6 (pp) B9EKR1
760	pp	P11798 (pp) Q9WU78
3131	pp	Q9CQJ8 (pp) Q9ERS2
3241	pp	P56480 (pp) Q8K3J1
3841	pp	P68510 (pp) P48036
1769	pp	Q9DB77 (pp) Q9DCJ5
4034	pp	Q01097 (pp) P62259
1728	pp	O88696 (pp) P42125
1032	pp	P68254 (pp) P10637
3678	pp	Q76MZ3 (pp) P62259
3840	pp	P68510 (pp) P50518
1758	pp	Q91VM9 (pp) Q99LC5
3022	pp	Q9WUM5 (pp) P06151
3450	pp	Q9DB20 (pp) Q9ERS2
753	pp	Q9D1T0 (pp) P12023
2953	pp	Q9CPP6 (pp) Q8K3J1
2466	pp	P26443 (pp) Q8BH04
1683	pp	Q9D023 (pp) Q9CQH3
1896	pp	Q8JZQ2 (pp) P00493
2218	pp	P52503 (pp) Q9CR68
1578	pp	P35486 (pp) Q9D2G2
752	pp	Q61316 (pp) Q60864
1250	pp	Q7TQF7 (pp) Q8BZ98
1104	pp	Q60598 (pp) P63085
3163	pp	Q9CR68 (pp) Q9CQ69
3661	pp	Q9CQZ6 (pp) Q91YT0
4033	pp	Q01097 (pp) P48962
3274	pp	Q8BMF4 (pp) Q9WUM5
2804	pp	Q9Z1P6 (pp) Q9DCJ5
3954	pp	Q9D6J6 (pp) Q01097
1087	pp	Q60931 (pp) Q9CQH3
2544	pp	P12023 (pp) P56564
2567	pp	P61922 (pp) P15105
1709	pp	O35129 (pp) Q9DCT2
2217	pp	P52503 (pp) P56391
846	pp	Q60930 (pp) Q01097
1727	pp	O88696 (pp) Q91YT0
2216	pp	P52503 (pp) Q9DB20
751	pp	O08917 (pp) Q60634
3449	pp	Q9DB20 (pp) Q9D3D9
3021	pp	Q9WUM5 (pp) Q9D6J6
1096	pp	Q8VDP6 (pp) Q9Z1B3
2062	pp	Q60864 (pp) Q61699
2215	pp	P52503 (pp) Q99LC3
2719	pp	Q9CQA3 (pp) Q8K2B3
2718	pp	Q9CQA3 (pp) Q9CR68
3130	pp	Q9CQJ8 (pp) Q99KI0
3349	pp	Q9CZ13 (pp) Q91VR2
1074	pp	Q8VD37 (pp) P17426
2542	pp	P12023 (pp) O88935
750	pp	P97300 (pp) Q99P72
2615	pp	Q99LC5 (pp) Q99JY0
3773	pp	P23819 (pp) P38647
2750	pp	Q8BWT1 (pp) Q99JY0
749	pp	Q8CHH9 (pp) P50516
2717	pp	Q9CQA3 (pp) Q91VD9
3748	pp	Q9CZU6 (pp) Q8BH04
3273	pp	Q8BMF4 (pp) Q99JY0
3200	pp	Q91VD9 (pp) Q99LC3
2541	pp	P12023 (pp) P07901
1374	pp	P63101 (pp) P16330
1558	pp	P16054 (pp) Q9CR62
3660	pp	Q9CQZ6 (pp) Q91VR2
1037	pp	Q99K85 (pp) O88712
1726	pp	O88696 (pp) O08756
2566	pp	P61922 (pp) Q9EQ20
2143	pp	P40142 (pp) P52480
1874	pp	Q9CXZ1 (pp) Q62425
2425	pp	Q99KI0 (pp) Q9DCJ5
3068	pp	Q9DC70 (pp) Q9CPP6
1745	pp	Q9JJV2 (pp) P39053
3781	pp	Q06335 (pp) P04925
3199	pp	Q91VD9 (pp) Q6PB66
3322	pp	Q9D0M3 (pp) Q9CR68
2584	pp	Q8K1Z0 (pp) Q9D6J6
2658	pp	P12787 (pp) Q9CQ69
3321	pp	Q9D0M3 (pp) Q91YT0
1725	pp	O88696 (pp) P52503
878	pp	Q9WU78 (pp) Q62420
2235	pp	Q8R4N0 (pp) Q9WUM5
1873	pp	Q9CXZ1 (pp) Q9CQJ8
1855	pp	Q62351 (pp) Q91VZ6
988	pp	Q64332 (pp) P46460
877	pp	Q9WU78 (pp) P05480
2357	pp	Q02248 (pp) Q68FH0
1872	pp	Q9CXZ1 (pp) Q9Z1P6
3512	pp	P08249 (pp) Q8BMF3
3747	pp	Q9CZU6 (pp) P35486
2984	pp	Q9DCW4 (pp) Q921G7
1290	pp	Q9CQC7 (pp) Q62425
3037	pp	Q9D1K2 (pp) Q9CQ75
2003	pp	Q9DCJ5 (pp) Q9CQH3
3588	pp	Q9DCT2 (pp) P52503
1557	pp	P16054 (pp) Q99JY0
3546	pp	Q9CQ69 (pp) P00405
3129	pp	Q9CQJ8 (pp) Q91YT0
1680	pp	Q61548 (pp) P17427
2002	pp	Q9DCJ5 (pp) Q9DCX2
964	pp	Q9CPQ1 (pp) Q9CPP6
1126	pp	Q62425 (pp) Q9Z1P6
1335	pp	Q9D6J5 (pp) Q06185
2424	pp	Q99KI0 (pp) Q9D0M3
2716	pp	Q9CQA3 (pp) Q9D6J6
2272	pp	Q8K2B3 (pp) Q9WUM5
1591	pp	Q99JY9 (pp) Q60598
2023	pp	Q91YT0 (pp) Q9D3D9
2927	pp	Q9D2G2 (pp) Q9WUM5
1871	pp	Q9CXZ1 (pp) Q9D0M3
3067	pp	Q9DC70 (pp) P56480
4032	pp	Q01097 (pp) O08599
3511	pp	P08249 (pp) Q8BMF4
3894	pp	Q9D3D9 (pp) Q9CQH3
3416	pp	P19783 (pp) Q9DCX2
3448	pp	Q9DB20 (pp) Q91YT0
1845	pp	P63044 (pp) Q6PIE5
2214	pp	P52503 (pp) P97450
1103	pp	Q60598 (pp) P59999
982	pp	P00493 (pp) P06151
3447	pp	Q9DB20 (pp) Q9WUM5
2112	pp	Q7TMF3 (pp) Q9DCJ5
3872	pp	Q03265 (pp) Q06185
3730	pp	Q9DCD0 (pp) Q91ZJ5
3587	pp	Q9DCT2 (pp) Q91VD9
[truncated: 1,403 more rows]
