# Supplementary material for: APP Is a Context-Sensitive Regulator of the Hippocampal Presynaptic Active Zone
Source: PLOS journal article supplement (doi:10.1371/journal.pcbi.1004832), 2016-04-19
Supplement: S6 (10.1371/journal.pcbi.1004832.s006) [file journal.pcbi.1004832.s006.cys › CytoscapeSession-2016_01_22-10_07/tables/36-Basic+Network/SHARED_ATTRS-org.cytoscape.model.CyNetwork-36+shared+network.cytable]

CyCSV-Version	1
SUID	shared name
java.lang.Long	java.lang.String
36 shared network
62	basic_network_interactions
36
24660	Core Network PAZ(1)
24906	Core Network PAZ(1)
4077	Core Network PAZ(1)
4095	Core Network PAZ(1)
4105	Core Network PAZ(1)
