# Supplementary material for: APP Is a Context-Sensitive Regulator of the Hippocampal Presynaptic Active Zone
Source: PLOS journal article supplement (doi:10.1371/journal.pcbi.1004832), 2016-04-19
Supplement: S6 (10.1371/journal.pcbi.1004832.s006) [file journal.pcbi.1004832.s006.cys › CytoscapeSession-2016_01_22-10_07/tables/36-Basic+Network/SHARED_ATTRS-org.cytoscape.model.CyNode-36+shared+node.cytable]

CyCSV-Version	1
SUID	shared name
java.lang.Long	java.lang.String
36 shared node
241	Q9CQI6
118	Q9ERD7
503	P49615
376	Q9CPW4
123	P20152
635	P63085
508	P28660
509	P60879
384	P15116
512	Q9JM76
513	Q9R0Q6
133	Q03157
261	Q6P1F6
518	Q99N28
263	Q9D6F9
519	Q9JLB0
648	Q9Z2H5
137	Q61151
649	Q3UHD9
394	Q6PH08
395	O88737
397	Q9CVB6
270	P20357
398	P59999
143	Q91VR7
271	P01831
273	P28667
274	O55042
660	Q76MZ3
661	P63330
662	P16546
663	Q8C8R3
280	O54991
664	P47757
409	Q8R001
156	P57780
158	P23242
672	Q06335
417	P14873
673	Q9QUI0
547	Q02248
164	O88643
292	Q64332
548	P60710
293	O70318
166	Q7TMB8
297	Q9JIS5
553	O08788
170	Q7TSJ2
554	Q99KJ8
173	P08553
302	Q62261
175	P08551
304	Q60996
178	P40124
306	P30999
562	Q8R5M8
179	P18760
307	Q68FF6
563	Q9WV92
565	P12023
447	P16054
448	P62962
323	P99024
453	P47754
455	Q99JY9
583	Q6PER3
330	P62746
75	O88342
205	Q61644
461	Q64010
79	P58771
82	P23927
341	P61161
469	Q9D898
601	P31938
90	Q812A2
476	P18052
351	Q9QXS6
96	O89053
225	P27546
482	Q9JJV2
356	P10637
358	P68368
232	P19246
488	Q9JHU4
489	P46660
106	Q9CYT6
362	Q99104
107	Q9D8Y0
492	P63001
500	P18872
375	P17182
120	Q9CQW1
378	P05063
380	Q9WUA3
514	Q68FD5
515	Q9QYJ0
260	P28663
520	Q8BVE3
393	P39053
521	P50518
652	P06151
401	Q9WTT4
529	P62874
530	P63213
536	Q62277
154	Q99NE5
666	Q9Z1G3
283	O08585
667	P51863
165	Q80TZ3
423	P61264
426	P06745
557	Q62442
561	O35526
434	Q9DB05
435	P52480
564	P62814
309	Q9DBJ1
569	P05064
442	P63082
321	P84091
197	Q9CWZ7
200	P46096
331	P16858
77	O54774
592	P09411
81	Q9QYX7
593	P17751
83	Q9EQZ6
211	O35643
597	P50516
470	P63017
598	P57746
343	P63011
599	P17426
216	O08599
600	P17427
93	Q8K400
607	P46460
352	P17183
353	Q6IRU5
354	Q9DBG3
611	P63037
359	P47857
615	Q9Z1G4
616	Q9D1K2
233	P62743
490	P63044
236	P47708
111	Q63810
368	P08226
630	P68404
121	Q6P9K9
383	P06837
269	Q3UVX5
146	P97300
275	P63328
152	P11798
157	Q9QY76
161	Q91XV3
549	Q6PHZ2
295	Q9CS84
300	P48453
308	P23818
311	P62204
185	P26645
314	P28652
326	O70589
328	P13595
329	P11627
203	P35564
467	Q9R0K7
84	P35802
214	P20444
224	P63318
100	D3YVF0
686	Q01097
685	Q80Z38
684	Q9CQZ5
683	Q9D6J6
682	O08749
681	Q9D051
680	Q9D3D9
679	O09111
678	Q03265
677	P68510
676	P12382
675	P35438
674	P05202
671	P23819
670	P35436
669	Q9CZU6
668	Q9DCD0
665	P62259
659	Q9CQZ6
658	Q9CQ54
657	Q9DCT2
656	Q9CQ69
655	P08249
654	Q9D6R2
653	P54071
651	Q9DB20
650	Q9CQH3
647	Q6P9K8
646	O88952
645	P19783
644	Q8BK64
643	P63038
642	Q8BH95
641	Q9CZ13
640	Q9D0M3
639	Q99LC3
638	Q99LY9
637	Q8BMF4
636	Q05920
634	P61027
633	Q61598
632	P56480
631	P17742
629	P67778
628	Q9JLJ2
627	Q91VR2
626	Q9CPQ8
625	Q91VD9
624	Q9DCS9
623	Q9CR68
622	P52196
621	P05132
620	Q9CQJ8
619	Q06185
618	Q9DC70
617	Q9D0S9
614	Q9WUM5
613	Q9D0K2
612	Q9CQN1
610	Q9DCW4
609	Q9CPP6
608	P15105
606	Q08331
605	Q9CQ62
604	P62897
603	Q9D2G2
602	Q3UIU2
596	P70404
595	O88441
594	Q7TQI3
591	Q9Z1P6
590	P63137
589	P62812
588	O70325
587	P48771
586	Q64133
585	P47738
584	P63005
582	O70161
581	Q9Z1B3
580	Q921G7
579	Q8BWT1
578	Q9CQA3
577	P12787
576	Q61425
575	Q99LC5
574	Q8BGH2
573	Q99LX0
572	P62331
571	Q8K1Z0
570	P11499
568	P17710
567	P48320
566	P61922
560	Q9WV18
559	P56391
558	Q9D172
556	P26443
555	Q91Z53
552	Q99KI0
551	Q9ERS2
550	P97807
546	P05480
545	P51881
544	Q91WD5
543	Q8K2B3
542	P68369
541	Q8VEM8
540	Q3ULD5
539	Q8R4N0
538	P52503
537	Q60631
535	P62073
534	P99029
533	Q9CQV8
532	Q9CQR4
531	P40142
528	Q9EQ20
527	Q99KR7
526	O35658
525	Q7TMF3
524	Q9DCX2
523	Q61735
522	P97797
517	P19536
516	Q60864
511	Q91YT0
510	Q9DCJ5
507	O08756
506	Q99JY0
505	P04925
504	P39688
502	P03930
501	Q9CQ75
499	Q8VDD5
498	P51174
497	Q8JZQ2
496	Q8JZN5
495	Q60676
494	Q9CXZ1
493	Q8BG51
491	Q62351
487	Q9D855
486	Q8K3J1
485	Q9DB77
484	Q91VM9
483	Q9DC69
481	Q9CQQ7
480	O88696
479	O35129
478	Q9CZS1
477	P70232
475	P56379
474	Q9D023
473	P12367
472	Q61548
471	P45878
468	Q80T41
466	P13707
465	Q64521
464	Q9QUH0
463	P20108
462	Q9JLM8
460	P97450
459	O88935
458	P62823
457	Q99PT1
456	Q99MN9
454	P14094
452	Q9CZT8
451	P35486
450	P22315
449	Q61102
446	P09671
445	P18572
444	O35465
443	Q8BPN8
441	Q9CQ92
440	Q8K1M6
439	Q9DBL1
438	P53395
437	Q9JHI5
436	Q93092
433	Q61301
432	Q9Z2I9
431	P50544
430	Q61831
429	P63040
428	Q923T9
427	Q920I9
425	Q3UTJ2
424	Q7TPR4
422	P70441
421	P26040
420	Q9EP69
419	Q62420
418	P43024
416	P09103
415	P56382
414	Q3UMR5
413	Q91ZA3
412	Q61879
411	P63101
410	Q9QWI6
408	Q9DBF1
407	Q64516
406	Q8VDN2
405	Q6PCP5
404	P23506
403	Q9D6J5
402	Q00612
400	Q5FWK3
399	Q8CHU3
396	Q9CQC7
392	Q6PB66
391	P31324
390	Q8BR92
389	P97772
388	Q8CHT0
387	P29758
386	Q99L47
385	Q7TQF7
382	P07901
381	P61982
379	Q60597
377	Q8BKZ9
374	Q8BMS1
373	Q9Z268
372	Q8BGD5
371	P42125
370	Q61290
369	Q8R0S4
367	Q91ZX7
366	Q8BLK3
365	P62835
364	Q6R891
363	P60766
361	Q62048
360	Q9D6M3
357	Q922R8
355	P55088
350	Q8BHL5
349	O88712
348	Q9DCB8
347	Q9Z1J3
346	Q8BMF3
345	Q62425
344	P38647
342	Q60598
340	Q9Z0X1
339	Q8VDP6
338	Q99L43
337	Q8CAQ8
336	Q9JLZ3
335	P17665
334	Q60931
333	Q8QZT1
332	Q8VD37
327	Q8BKX1
325	P16330
324	P03995
322	Q9Z218
320	Q9QXJ1
319	P68033
318	Q9R0Y5
317	P47802
316	Q6PIE5
315	P70414
313	Q99K85
312	P17156
310	P68254
305	P62482
303	Q9R0N7
301	Q925I1
299	Q4ACU6
298	Q8BYM5
296	P40630
294	O08539
291	P60761
290	P00493
289	Q9Z0R4
288	Q80Y14
287	Q5SQX6
286	Q9CPQ1
285	Q3UHL1
284	Q60932
282	Q9QYR6
281	B9EKR1
279	P45376
278	Q62419
277	P60469
276	Q91ZJ5
272	Q9D8B3
268	Q91WC3
267	Q8BWF0
266	Q8BH04
265	Q99MR8
264	Q99PJ0
262	P41216
259	P68181
258	Q80VP1
257	Q6PIC6
256	Q9R111
255	Q9D0F9
254	Q62465
253	Q9WUB3
252	Q91VZ6
251	Q8CHC4
250	Q61411
249	Q60875
248	O55023
247	Q80UU9
246	Q9R0P9
245	P0C0A3
244	Q9WU78
243	P50396
242	P62821
240	Q9CRB9
239	P35279
238	Q9DC28
237	Q8VBV7
235	Q60605
234	P22723
231	Q80U28
230	Q61553
229	Q810U3
228	P67871
227	Q8R3V5
226	P58281
223	P70296
222	P56564
221	P00405
220	Q9EPJ9
219	Q5DQR4
218	O35239
217	Q8BW75
215	Q9QXS1
213	Q60930
212	Q99P72
210	Q8R191
209	P61164
208	O55100
207	Q5RJI5
206	Q8BZ98
204	P19096
202	Q9CZ42
201	Q61490
199	Q922H2
198	P28740
196	O35857
195	Q9D880
194	P43406
193	Q71LX4
192	P48962
191	Q8CI94
190	Q8K021
189	P63321
188	P48722
187	O35143
186	P84096
184	P28661
183	P42208
182	Q9WV34
181	Q9Z2Q6
180	Q9Z2I0
177	O54983
176	Q8VDQ8
174	Q8K4Z3
172	Q61699
171	P12960
169	O35136
168	O55131
167	Q9WV55
163	Q8BIJ6
162	P55302
160	P48758
159	Q9R1V6
155	Q9CR16
153	Q8K183
151	P48036
150	Q9D1T0
149	Q61316
148	O08917
147	Q60634
145	Q8CHH9
144	Q9CR62
142	Q68FH0
141	Q7TMM9
140	Q2PFD7
139	Q920P5
138	Q3THE2
136	Q91VT4
135	Q78IK2
134	Q8R5C5
132	Q8CGK3
131	Q3ULJ0
130	Q61206
129	Q9QYA2
128	Q8R366
127	F6SEU4
126	Q921M7
125	Q8BH59
124	Q8BRT1
122	Q9CZW5
119	Q921J2
117	P43006
116	Q80XN0
115	Q9CWS0
114	Q8K0T0
113	P13020
112	Q61330
110	Q9Z2W9
109	Q04447
108	Q9Z0P4
105	Q99KB8
104	Q9D6K5
103	Q6URW6
102	Q9R1V7
101	Q9ES97
99	Q810U4
98	A2CG49
97	P53994
95	Q9JIA1
94	Q91WS0
92	Q91ZZ3
91	Q9QZF2
89	Q9Z0E0
88	Q4KMM3
87	Q9CR95
86	Q60737
85	P80560
80	Q03137
78	Q8VHW2
76	Q9DB73
74	Q9R0P5
73	Q9R1V4
72	Q00493
4115	Node 1
4087	Q60598
32562	P68369
