# Supplementary material for: APP Is a Context-Sensitive Regulator of the Hippocampal Presynaptic Active Zone
Source: PLOS journal article supplement (doi:10.1371/journal.pcbi.1004832), 2016-04-19
Supplement: S6 (10.1371/journal.pcbi.1004832.s006) [file journal.pcbi.1004832.s006.cys › CytoscapeSession-2016_01_22-10_07/tables/62-Core+Network+PAZ/HIDDEN-org.cytoscape.model.CyEdge-62+hidden+edge.cytable]

"CyCSV-Version","1"
"SUID"
"java.lang.Long"
""
"62 hidden edge",""
"687"
"688"
"689"
"690"
"691"
"692"
"693"
"694"
"695"
"696"
"697"
"698"
"699"
"700"
"701"
"702"
"703"
"704"
"705"
"706"
"707"
"708"
"709"
"710"
"711"
"712"
"713"
"714"
"715"
"716"
"717"
"718"
"719"
"720"
"721"
"722"
"723"
"724"
"725"
"726"
"727"
"728"
"729"
"730"
"731"
"732"
"733"
"734"
"735"
"736"
"737"
"738"
"739"
"740"
"741"
"742"
"743"
"744"
"745"
"746"
"747"
"748"
"749"
"750"
"751"
"752"
"753"
"754"
"755"
"756"
"757"
"758"
"759"
"760"
"761"
"762"
"763"
"764"
"765"
"766"
"767"
"768"
"769"
"770"
"771"
"772"
"773"
"774"
"775"
"776"
"777"
"778"
"779"
"780"
"781"
"782"
"783"
"784"
"785"
"786"
"787"
"788"
"789"
"790"
"791"
"792"
"793"
"794"
"795"
"796"
"797"
"798"
"799"
"800"
"801"
"802"
"803"
"804"
"805"
"806"
"807"
"808"
"809"
"810"
"811"
"812"
"813"
"814"
"815"
"816"
"817"
"818"
"819"
"820"
"821"
"822"
"823"
"824"
"825"
"826"
"827"
"828"
"829"
"830"
"831"
"832"
"833"
"834"
"835"
"836"
"837"
"838"
"839"
"840"
"841"
"842"
"843"
"844"
"845"
"846"
"847"
"848"
"849"
"850"
"851"
"852"
"853"
"854"
"855"
"856"
"857"
"858"
"859"
"860"
"861"
"862"
"863"
"864"
"865"
"866"
"867"
"868"
"869"
"870"
"871"
"872"
"873"
"874"
"875"
"876"
"877"
"878"
"879"
"880"
"881"
"882"
"883"
"884"
"885"
"886"
"887"
"888"
"889"
"890"
"891"
"892"
"893"
"894"
"895"
"896"
"897"
"898"
"899"
"900"
"901"
"902"
"903"
"904"
"905"
"906"
"907"
"908"
"909"
"910"
"911"
"912"
"913"
"914"
"915"
"916"
"917"
"918"
"919"
"920"
"921"
"922"
"923"
"924"
"925"
"926"
"927"
"928"
"929"
"930"
"931"
"932"
"933"
"934"
"935"
"936"
"937"
"938"
"939"
"940"
"941"
"942"
"943"
"944"
"945"
"946"
"947"
"948"
"949"
"950"
"951"
"952"
"953"
"954"
"955"
"956"
"957"
"958"
"959"
"960"
"961"
"962"
"963"
"964"
"965"
"966"
"967"
"968"
"969"
"970"
"971"
"972"
"973"
"974"
"975"
"976"
"977"
"978"
"979"
"980"
"981"
"982"
"983"
"984"
"985"
"986"
"987"
"988"
"989"
"990"
"991"
"992"
"993"
"994"
"995"
"996"
"997"
"998"
"999"
"1000"
"1001"
"1002"
"1003"
"1004"
"1005"
"1006"
"1007"
"1008"
"1009"
"1010"
"1011"
"1012"
"1013"
"1014"
"1015"
"1016"
"1017"
"1018"
"1019"
"1020"
"1021"
"1022"
"1023"
"1024"
"1025"
"1026"
"1027"
"1028"
"1029"
"1030"
"1031"
"1032"
"1033"
"1034"
"1035"
"1036"
"1037"
"1038"
"1039"
"1040"
"1041"
"1042"
"1043"
"1044"
"1045"
"1046"
"1047"
"1048"
"1049"
"1050"
"1051"
"1052"
"1053"
"1054"
"1055"
"1056"
"1057"
"1058"
"1059"
"1060"
"1061"
"1062"
"1063"
"1064"
"1065"
"1066"
"1067"
"1068"
"1069"
"1070"
"1071"
"1072"
"1073"
"1074"
"1075"
"1076"
"1077"
"1078"
"1079"
"1080"
"1081"
"1082"
"1083"
"1084"
"1085"
"1086"
"1087"
"1088"
"1089"
"1090"
"1091"
"1092"
"1093"
"1094"
"1095"
"1096"
"1097"
"1098"
"1099"
"1100"
"1101"
"1102"
"1103"
"1104"
"1105"
"1106"
"1107"
"1108"
"1109"
"1110"
"1111"
"1112"
"1113"
"1114"
"1115"
"1116"
"1117"
"1118"
"1119"
"1120"
"1121"
"1122"
"1123"
"1124"
"1125"
"1126"
"1127"
"1128"
"1129"
"1130"
"1131"
"1132"
"1133"
"1134"
"1135"
"1136"
"1137"
"1138"
"1139"
"1140"
"1141"
"1142"
"1143"
"1144"
"1145"
"1146"
"1147"
"1148"
"1149"
"1150"
"1151"
"1152"
"1153"
"1154"
"1155"
"1156"
"1157"
"1158"
"1159"
"1160"
"1161"
"1162"
"1163"
"1164"
"1165"
"1166"
"1167"
"1168"
"1169"
"1170"
"1171"
"1172"
"1173"
"1174"
"1175"
"1176"
"1177"
"1178"
"1179"
"1180"
"1181"
"1182"
"1183"
"1184"
"1185"
"1186"
"1187"
"1188"
"1189"
"1190"
"1191"
"1192"
"1193"
"1194"
"1195"
"1196"
"1197"
"1198"
"1199"
"1200"
"1201"
"1202"
"1203"
"1204"
"1205"
"1206"
"1207"
"1208"
"1209"
"1210"
"1211"
"1212"
"1213"
"1214"
"1215"
"1216"
"1217"
"1218"
"1219"
"1220"
"1221"
"1222"
"1223"
"1224"
"1225"
"1226"
"1227"
"1228"
"1229"
"1230"
"1231"
"1232"
"1233"
"1234"
"1235"
"1236"
"1237"
"1238"
"1239"
"1240"
"1241"
"1242"
"1243"
"1244"
"1245"
"1246"
"1247"
"1248"
"1249"
"1250"
"1251"
"1252"
"1253"
"1254"
"1255"
"1256"
"1257"
"1258"
"1259"
"1260"
"1261"
"1262"
"1263"
"1264"
"1265"
"1266"
"1267"
"1268"
"1269"
"1270"
"1271"
"1272"
"1273"
"1274"
"1275"
"1276"
"1277"
"1278"
"1279"
"1280"
"1281"
"1282"
"1283"
"1284"
"1285"
"1286"
"1287"
"1288"
"1289"
"1290"
"1291"
"1292"
"1293"
"1294"
"1295"
"1296"
"1297"
"1298"
"1299"
"1300"
"1301"
"1302"
"1303"
"1304"
"1305"
"1306"
"1307"
"1308"
"1309"
"1310"
"1311"
"1312"
"1313"
"1314"
"1315"
"1316"
"1317"
"1318"
"1319"
"1320"
"1321"
"1322"
"1323"
"1324"
"1325"
"1326"
"1327"
"1328"
"1329"
"1330"
"1331"
"1332"
"1333"
"1334"
"1335"
"1336"
"1337"
"1338"
"1339"
"1340"
"1341"
"1342"
"1343"
"1344"
"1345"
"1346"
"1347"
"1348"
"1349"
"1350"
"1351"
"1352"
"1353"
"1354"
"1355"
"1356"
"1357"
"1358"
"1359"
"1360"
"1361"
"1362"
"1363"
"1364"
"1365"
"1366"
"1367"
"1368"
"1369"
"1370"
"1371"
"1372"
"1373"
"1374"
"1375"
"1376"
"1377"
"1378"
"1379"
"1380"
"1381"
"1382"
"1383"
"1384"
"1385"
"1386"
"1387"
"1388"
"1389"
"1390"
"1391"
"1392"
"1393"
"1394"
"1395"
"1396"
"1397"
"1398"
"1399"
"1400"
"1401"
"1402"
"1403"
"1404"
"1405"
"1406"
"1407"
"1408"
"1409"
"1410"
"1411"
"1412"
"1413"
"1414"
"1415"
"1416"
"1417"
"1418"
"1419"
"1420"
"1421"
"1422"
"1423"
"1424"
"1425"
"1426"
"1427"
"1428"
"1429"
"1430"
"1431"
"1432"
"1433"
"1434"
"1435"
"1436"
"1437"
"1438"
"1439"
"1440"
"1441"
"1442"
"1443"
"1444"
"1445"
"1446"
"1447"
"1448"
"1449"
"1450"
"1451"
"1452"
"1453"
"1454"
"1455"
"1456"
"1457"
"1458"
"1459"
"1460"
"1461"
"1462"
"1463"
"1464"
"1465"
"1466"
"1467"
"1468"
"1469"
"1470"
"1471"
"1472"
"1473"
"1474"
"1475"
"1476"
"1477"
"1478"
"1479"
"1480"
"1481"
"1482"
"1483"
"1484"
"1485"
"1486"
"1487"
"1488"
"1489"
"1490"
"1491"
"1492"
"1493"
"1494"
"1495"
"1496"
"1497"
"1498"
"1499"
"1500"
"1501"
"1502"
"1503"
"1504"
"1505"
"1506"
"1507"
"1508"
"1509"
"1510"
"1511"
"1512"
"1513"
"1514"
"1515"
"1516"
"1517"
"1518"
"1519"
"1520"
"1521"
"1522"
"1523"
"1524"
"1525"
"1526"
"1527"
"1528"
"1529"
"1530"
"1531"
"1532"
"1533"
"1534"
"1535"
"1536"
"1537"
"1538"
"1539"
"1540"
"1541"
"1542"
"1543"
"1544"
"1545"
"1546"
"1547"
"1548"
"1549"
"1550"
"1551"
"1552"
"1553"
"1554"
"1555"
"1556"
"1557"
"1558"
"1559"
"1560"
"1561"
"1562"
"1563"
"1564"
"1565"
"1566"
"1567"
"1568"
"1569"
"1570"
"1571"
"1572"
"1573"
"1574"
"1575"
"1576"
"1577"
"1578"
"1579"
"1580"
"1581"
"1582"
"1583"
"1584"
"1585"
"1586"
"1587"
"1588"
"1589"
"1590"
"1591"
"1592"
"1593"
"1594"
"1595"
"1596"
"1597"
"1598"
"1599"
"1600"
"1601"
"1602"
"1603"
"1604"
"1605"
"1606"
"1607"
"1608"
"1609"
"1610"
"1611"
"1612"
"1613"
"1614"
"1615"
"1616"
"1617"
"1618"
"1619"
"1620"
"1621"
"1622"
"1623"
"1624"
"1625"
"1626"
"1627"
"1628"
"1629"
"1630"
"1631"
"1632"
"1633"
"1634"
"1635"
"1636"
"1637"
"1638"
"1639"
"1640"
"1641"
"1642"
"1643"
"1644"
"1645"
"1646"
"1647"
"1648"
"1649"
"1650"
"1651"
"1652"
"1653"
"1654"
"1655"
"1656"
"1657"
"1658"
"1659"
"1660"
"1661"
"1662"
"1663"
"1664"
"1665"
"1666"
"1667"
"1668"
"1669"
"1670"
"1671"
"1672"
"1673"
"1674"
"1675"
"1676"
"1677"
"1678"
"1679"
"1680"
"1681"
"1682"
"1683"
"1684"
"1685"
"1686"
"1687"
"1688"
"1689"
"1690"
"1691"
"1692"
"1693"
"1694"
"1695"
"1696"
"1697"
"1698"
"1699"
"1700"
"1701"
"1702"
"1703"
"1704"
"1705"
"1706"
"1707"
"1708"
"1709"
"1710"
"1711"
"1712"
"1713"
"1714"
"1715"
"1716"
"1717"
"1718"
"1719"
"1720"
"1721"
"1722"
"1723"
"1724"
"1725"
"1726"
"1727"
"1728"
"1729"
"1730"
"1731"
"1732"
"1733"
"1734"
"1735"
"1736"
"1737"
"1738"
"1739"
"1740"
"1741"
"1742"
"1743"
"1744"
"1745"
"1746"
"1747"
"1748"
"1749"
"1750"
"1751"
"1752"
"1753"
"1754"
"1755"
"1756"
"1757"
"1758"
"1759"
"1760"
"1761"
"1762"
"1763"
"1764"
"1765"
"1766"
"1767"
"1768"
"1769"
"1770"
"1771"
"1772"
"1773"
"1774"
"1775"
"1776"
"1777"
"1778"
"1779"
"1780"
"1781"
"1782"
"1783"
"1784"
"1785"
"1786"
"1787"
"1788"
"1789"
"1790"
"1791"
"1792"
"1793"
"1794"
"1795"
"1796"
"1797"
"1798"
"1799"
"1800"
"1801"
"1802"
"1803"
"1804"
"1805"
"1806"
"1807"
"1808"
"1809"
"1810"
"1811"
"1812"
"1813"
"1814"
"1815"
"1816"
"1817"
"1818"
"1819"
"1820"
"1821"
"1822"
"1823"
"1824"
"1825"
"1826"
"1827"
"1828"
"1829"
"1830"
"1831"
"1832"
"1833"
"1834"
"1835"
"1836"
"1837"
"1838"
"1839"
"1840"
"1841"
"1842"
"1843"
"1844"
"1845"
"1846"
"1847"
"1848"
"1849"
"1850"
"1851"
"1852"
"1853"
"1854"
"1855"
"1856"
"1857"
"1858"
"1859"
"1860"
"1861"
"1862"
"1863"
"1864"
"1865"
"1866"
"1867"
"1868"
"1869"
"1870"
"1871"
"1872"
"1873"
"1874"
"1875"
"1876"
"1877"
"1878"
"1879"
"1880"
"1881"
"1882"
"1883"
"1884"
"1885"
"1886"
"1887"
"1888"
"1889"
"1890"
"1891"
"1892"
"1893"
"1894"
"1895"
"1896"
"1897"
"1898"
"1899"
"1900"
"1901"
"1902"
"1903"
"1904"
"1905"
"1906"
"1907"
"1908"
"1909"
"1910"
"1911"
"1912"
"1913"
"1914"
"1915"
"1916"
"1917"
"1918"
"1919"
"1920"
"1921"
"1922"
"1923"
"1924"
"1925"
"1926"
"1927"
"1928"
"1929"
"1930"
"1931"
"1932"
"1933"
"1934"
"1935"
"1936"
"1937"
"1938"
"1939"
"1940"
"1941"
"1942"
"1943"
"1944"
"1945"
"1946"
"1947"
"1948"
"1949"
"1950"
"1951"
"1952"
"1953"
"1954"
"1955"
"1956"
"1957"
"1958"
"1959"
"1960"
"1961"
"1962"
"1963"
"1964"
"1965"
"1966"
"1967"
"1968"
"1969"
"1970"
"1971"
"1972"
"1973"
"1974"
"1975"
"1976"
"1977"
"1978"
"1979"
"1980"
"1981"
"1982"
"1983"
"1984"
"1985"
"1986"
"1987"
"1988"
"1989"
"1990"
"1991"
"1992"
"1993"
"1994"
"1995"
"1996"
"1997"
"1998"
"1999"
"2000"
"2001"
"2002"
"2003"
"2004"
"2005"
"2006"
"2007"
"2008"
"2009"
"2010"
"2011"
"2012"
"2013"
"2014"
"2015"
"2016"
"2017"
"2018"
"2019"
"2020"
"2021"
"2022"
"2023"
"2024"
"2025"
"2026"
"2027"
"2028"
"2029"
"2030"
"2031"
"2032"
"2033"
"2034"
"2035"
"2036"
"2037"
"2038"
"2039"
"2040"
"2041"
"2042"
"2043"
"2044"
"2045"
"2046"
"2047"
"2048"
"2049"
"2050"
"2051"
"2052"
"2053"
"2054"
"2055"
"2056"
"2057"
"2058"
"2059"
"2060"
"2061"
"2062"
"2063"
"2064"
"2065"
"2066"
"2067"
"2068"
"2069"
"2070"
"2071"
"2072"
"2073"
"2074"
"2075"
"2076"
"2077"
"2078"
"2079"
"2080"
"2081"
"2082"
"2083"
"2084"
"2085"
"2086"
"2087"
"2088"
"2089"
"2090"
"2091"
"2092"
"2093"
"2094"
"2095"
"2096"
"2097"
"2098"
"2099"
"2100"
"2101"
"2102"
"2103"
"2104"
"2105"
"2106"
"2107"
"2108"
"2109"
"2110"
"2111"
"2112"
"2113"
"2114"
"2115"
"2116"
"2117"
"2118"
"2119"
"2120"
"2121"
"2122"
"2123"
"2124"
"2125"
"2126"
"2127"
"2128"
"2129"
"2130"
"2131"
"2132"
"2133"
"2134"
"2135"
"2136"
"2137"
"2138"
"2139"
"2140"
"2141"
"2142"
"2143"
"2144"
"2145"
"2146"
"2147"
"2148"
"2149"
"2150"
"2151"
"2152"
"2153"
"2154"
"2155"
"2156"
"2157"
"2158"
"2159"
"2160"
"2161"
"2162"
"2163"
"2164"
"2165"
"2166"
"2167"
"2168"
"2169"
"2170"
"2171"
"2172"
"2173"
"2174"
"2175"
"2176"
"2177"
"2178"
"2179"
"2180"
"2181"
"2182"
"2183"
"2184"
"2185"
"2186"
"2187"
"2188"
"2189"
"2190"
"2191"
"2192"
"2193"
"2194"
"2195"
"2196"
"2197"
"2198"
"2199"
"2200"
"2201"
"2202"
"2203"
"2204"
"2205"
"2206"
"2207"
"2208"
"2209"
"2210"
"2211"
"2212"
"2213"
"2214"
"2215"
"2216"
"2217"
"2218"
"2219"
"2220"
"2221"
"2222"
"2223"
"2224"
"2225"
"2226"
"2227"
"2228"
"2229"
"2230"
"2231"
"2232"
"2233"
"2234"
"2235"
"2236"
"2237"
"2238"
"2239"
"2240"
"2241"
"2242"
"2243"
"2244"
"2245"
"2246"
"2247"
"2248"
"2249"
"2250"
"2251"
"2252"
"2253"
"2254"
"2255"
"2256"
"2257"
"2258"
"2259"
"2260"
"2261"
"2262"
"2263"
"2264"
"2265"
"2266"
"2267"
"2268"
"2269"
"2270"
"2271"
"2272"
"2273"
"2274"
"2275"
"2276"
"2277"
"2278"
"2279"
"2280"
"2281"
"2282"
"2283"
"2284"
"2285"
"2286"
"2287"
"2288"
"2289"
"2290"
"2291"
"2292"
"2293"
"2294"
"2295"
"2296"
"2297"
"2298"
"2299"
"2300"
"2301"
"2302"
"2303"
"2304"
"2305"
"2306"
"2307"
"2308"
"2309"
"2310"
"2311"
"2312"
"2313"
"2314"
"2315"
"2316"
"2317"
"2318"
"2319"
"2320"
"2321"
"2322"
"2323"
"2324"
"2325"
"2326"
"2327"
"2328"
"2329"
"2330"
"2331"
"2332"
"2333"
"2334"
"2335"
"2336"
"2337"
"2338"
"2339"
"2340"
"2341"
"2342"
"2343"
"2344"
"2345"
"2346"
"2347"
"2348"
"2349"
"2350"
"2351"
"2352"
"2353"
"2354"
"2355"
"2356"
"2357"
"2358"
"2359"
"2360"
"2361"
"2362"
"2363"
"2364"
"2365"
"2366"
"2367"
"2368"
"2369"
"2370"
"2371"
"2372"
"2373"
"2374"
"2375"
"2376"
"2377"
"2378"
"2379"
"2380"
"2381"
"2382"
"2383"
"2384"
"2385"
"2386"
"2387"
"2388"
"2389"
"2390"
"2391"
"2392"
"2393"
"2394"
"2395"
"2396"
"2397"
"2398"
"2399"
"2400"
"2401"
"2402"
"2403"
"2404"
"2405"
"2406"
"2407"
"2408"
"2409"
"2410"
"2411"
"2412"
"2413"
"2414"
"2415"
"2416"
"2417"
"2418"
"2419"
"2420"
"2421"
"2422"
"2423"
"2424"
"2425"
"2426"
"2427"
"2428"
"2429"
"2430"
"2431"
"2432"
"2433"
"2434"
"2435"
"2436"
"2437"
"2438"
"2439"
"2440"
"2441"
"2442"
"2443"
"2444"
"2445"
"2446"
"2447"
"2448"
"2449"
"2450"
"2451"
"2452"
"2453"
"2454"
"2455"
"2456"
"2457"
"2458"
"2459"
"2460"
"2461"
"2462"
"2463"
"2464"
"2465"
"2466"
"2467"
"2468"
"2469"
"2470"
"2471"
"2472"
"2473"
"2474"
"2475"
"2476"
"2477"
"2478"
"2479"
"2480"
"2481"
"2482"
"2483"
"2484"
"2485"
"2486"
"2487"
"2488"
"2489"
"2490"
"2491"
"2492"
"2493"
"2494"
"2495"
"2496"
"2497"
"2498"
"2499"
"2500"
"2501"
"2502"
"2503"
"2504"
"2505"
"2506"
"2507"
"2508"
"2509"
"2510"
"2511"
"2512"
"2513"
"2514"
"2515"
"2516"
"2517"
"2518"
"2519"
"2520"
"2521"
"2522"
"2523"
"2524"
"2525"
"2526"
"2527"
"2528"
"2529"
"2530"
"2531"
"2532"
"2533"
"2534"
"2535"
"2536"
"2537"
"2538"
"2539"
"2540"
"2541"
"2542"
"2543"
"2544"
"2545"
"2546"
"2547"
"2548"
"2549"
"2550"
"2551"
"2552"
"2553"
"2554"
"2555"
"2556"
"2557"
"2558"
"2559"
"2560"
"2561"
"2562"
"2563"
"2564"
"2565"
"2566"
"2567"
"2568"
"2569"
"2570"
"2571"
"2572"
"2573"
"2574"
"2575"
"2576"
"2577"
"2578"
"2579"
"2580"
"2581"
"2582"
"2583"
"2584"
"2585"
"2586"
"2587"
"2588"
"2589"
"2590"
"2591"
"2592"
"2593"
"2594"
"2595"
"2596"
"2597"
"2598"
"2599"
"2600"
"2601"
"2602"
"2603"
"2604"
"2605"
"2606"
"2607"
"2608"
"2609"
"2610"
"2611"
"2612"
"2613"
"2614"
"2615"
"2616"
"2617"
"2618"
"2619"
"2620"
"2621"
"2622"
"2623"
"2624"
"2625"
"2626"
"2627"
"2628"
"2629"
"2630"
"2631"
"2632"
"2633"
"2634"
"2635"
"2636"
"2637"
"2638"
"2639"
"2640"
"2641"
"2642"
"2643"
"2644"
"2645"
"2646"
"2647"
"2648"
"2649"
"2650"
"2651"
"2652"
"2653"
"2654"
"2655"
"2656"
"2657"
"2658"
"2659"
"2660"
"2661"
"2662"
"2663"
"2664"
"2665"
"2666"
"2667"
"2668"
"2669"
"2670"
"2671"
"2672"
"2673"
"2674"
"2675"
"2676"
"2677"
"2678"
"2679"
"2680"
"2681"
"2682"
"2683"
"2684"
"2685"
"2686"
"2687"
"2688"
"2689"
"2690"
"2691"
"2692"
"2693"
"2694"
"2695"
"2696"
"2697"
"2698"
"2699"
"2700"
"2701"
"2702"
"2703"
"2704"
"2705"
"2706"
"2707"
"2708"
"2709"
"2710"
"2711"
"2712"
"2713"
"2714"
"2715"
"2716"
"2717"
"2718"
"2719"
"2720"
"2721"
"2722"
"2723"
"2724"
"2725"
"2726"
"2727"
"2728"
"2729"
"2730"
"2731"
"2732"
"2733"
"2734"
"2735"
"2736"
"2737"
"2738"
"2739"
"2740"
"2741"
"2742"
"2743"
"2744"
"2745"
"2746"
"2747"
"2748"
"2749"
"2750"
"2751"
"2752"
"2753"
"2754"
"2755"
"2756"
"2757"
"2758"
"2759"
"2760"
"2761"
"2762"
"2763"
"2764"
"2765"
"2766"
"2767"
"2768"
"2769"
"2770"
"2771"
"2772"
"2773"
"2774"
"2775"
"2776"
"2777"
"2778"
"2779"
"2780"
"2781"
"2782"
"2783"
"2784"
"2785"
"2786"
"2787"
"2788"
"2789"
"2790"
"2791"
"2792"
"2793"
"2794"
"2795"
"2796"
"2797"
"2798"
"2799"
"2800"
"2801"
"2802"
"2803"
"2804"
"2805"
"2806"
"2807"
"2808"
"2809"
"2810"
"2811"
"2812"
"2813"
"2814"
"2815"
"2816"
"2817"
"2818"
"2819"
"2820"
"2821"
"2822"
"2823"
"2824"
"2825"
"2826"
"2827"
"2828"
"2829"
"2830"
"2831"
"2832"
"2833"
"2834"
"2835"
"2836"
"2837"
"2838"
"2839"
"2840"
"2841"
"2842"
"2843"
"2844"
"2845"
"2846"
"2847"
"2848"
"2849"
"2850"
"2851"
"2852"
"2853"
"2854"
"2855"
"2856"
"2857"
"2858"
"2859"
"2860"
"2861"
"2862"
"2863"
"2864"
"2865"
"2866"
"2867"
"2868"
"2869"
"2870"
"2871"
"2872"
"2873"
"2874"
"2875"
"2876"
"2877"
"2878"
"2879"
"2880"
"2881"
"2882"
"2883"
"2884"
"2885"
"2886"
"2887"
"2888"
"2889"
"2890"
"2891"
"2892"
"2893"
"2894"
"2895"
"2896"
"2897"
"2898"
"2899"
"2900"
"2901"
"2902"
"2903"
"2904"
"2905"
"2906"
"2907"
"2908"
"2909"
"2910"
"2911"
"2912"
"2913"
"2914"
"2915"
"2916"
"2917"
"2918"
"2919"
"2920"
"2921"
"2922"
"2923"
"2924"
"2925"
"2926"
"2927"
"2928"
"2929"
"2930"
"2931"
"2932"
"2933"
"2934"
"2935"
"2936"
"2937"
"2938"
"2939"
"2940"
"2941"
"2942"
"2943"
"2944"
"2945"
"2946"
"2947"
"2948"
"2949"
"2950"
"2951"
"2952"
"2953"
"2954"
"2955"
"2956"
"2957"
"2958"
"2959"
"2960"
"2961"
"2962"
"2963"
"2964"
"2965"
"2966"
"2967"
"2968"
"2969"
"2970"
"2971"
"2972"
"2973"
"2974"
"2975"
"2976"
"2977"
"2978"
"2979"
"2980"
"2981"
"2982"
"2983"
"2984"
"2985"
"2986"
"2987"
"2988"
"2989"
"2990"
"2991"
"2992"
"2993"
"2994"
"2995"
"2996"
"2997"
"2998"
"2999"
"3000"
"3001"
"3002"
"3003"
"3004"
"3005"
"3006"
"3007"
"3008"
"3009"
"3010"
"3011"
"3012"
"3013"
"3014"
"3015"
"3016"
"3017"
"3018"
"3019"
"3020"
"3021"
"3022"
"3023"
"3024"
"3025"
"3026"
"3027"
"3028"
"3029"
"3030"
"3031"
"3032"
"3033"
"3034"
"3035"
"3036"
"3037"
"3038"
"3039"
"3040"
"3041"
"3042"
"3043"
"3044"
"3045"
"3046"
"3047"
"3048"
"3049"
"3050"
"3051"
"3052"
"3053"
"3054"
"3055"
"3056"
"3057"
"3058"
"3059"
"3060"
"3061"
"3062"
"3063"
"3064"
"3065"
"3066"
"3067"
"3068"
"3069"
"3070"
"3071"
"3072"
"3073"
"3074"
"3075"
"3076"
"3077"
"3078"
"3079"
"3080"
"3081"
"3082"
"3083"
"3084"
"3085"
"3086"
"3087"
"3088"
"3089"
"3090"
"3091"
"3092"
"3093"
"3094"
"3095"
"3096"
"3097"
"3098"
"3099"
"3100"
"3101"
"3102"
"3103"
"3104"
"3105"
"3106"
"3107"
"3108"
"3109"
"3110"
"3111"
"3112"
"3113"
"3114"
"3115"
"3116"
"3117"
"3118"
"3119"
"3120"
"3121"
"3122"
"3123"
"3124"
"3125"
"3126"
"3127"
"3128"
"3129"
"3130"
"3131"
"3132"
"3133"
"3134"
"3135"
"3136"
"3137"
"3138"
"3139"
"3140"
"3141"
"3142"
"3143"
"3144"
"3145"
"3146"
"3147"
"3148"
"3149"
"3150"
"3151"
"3152"
"3153"
"3154"
"3155"
"3156"
"3157"
"3158"
"3159"
"3160"
"3161"
"3162"
"3163"
"3164"
"3165"
"3166"
"3167"
"3168"
"3169"
"3170"
"3171"
"3172"
"3173"
"3174"
"3175"
"3176"
"3177"
"3178"
"3179"
"3180"
"3181"
"3182"
"3183"
"3184"
"3185"
"3186"
"3187"
"3188"
"3189"
"3190"
"3191"
"3192"
"3193"
"3194"
"3195"
"3196"
"3197"
"3198"
"3199"
"3200"
"3201"
"3202"
"3203"
"3204"
"3205"
"3206"
"3207"
"3208"
"3209"
"3210"
"3211"
"3212"
"3213"
"3214"
"3215"
"3216"
"3217"
"3218"
"3219"
"3220"
"3221"
"3222"
"3223"
"3224"
"3225"
"3226"
"3227"
"3228"
"3229"
"3230"
"3231"
"3232"
"3233"
"3234"
"3235"
"3236"
"3237"
"3238"
"3239"
"3240"
"3241"
"3242"
"3243"
"3244"
"3245"
"3246"
"3247"
"3248"
"3249"
"3250"
"3251"
"3252"
"3253"
"3254"
"3255"
"3256"
"3257"
"3258"
"3259"
"3260"
"3261"
"3262"
"3263"
"3264"
"3265"
"3266"
"3267"
"3268"
"3269"
"3270"
"3271"
"3272"
"3273"
"3274"
"3275"
"3276"
"3277"
"3278"
"3279"
"3280"
"3281"
"3282"
"3283"
"3284"
"3285"
"3286"
"3287"
"3288"
"3289"
"3290"
"3291"
"3292"
"3293"
"3294"
"3295"
"3296"
"3297"
"3298"
"3299"
"3300"
"3301"
"3302"
"3303"
"3304"
"3305"
"3306"
"3307"
"3308"
"3309"
"3310"
"3311"
"3312"
"3313"
"3314"
"3315"
"3316"
"3317"
"3318"
"3319"
"3320"
"3321"
"3322"
"3323"
"3324"
"3325"
"3326"
"3327"
"3328"
"3329"
"3330"
"3331"
"3332"
"3333"
"3334"
"3335"
"3336"
"3337"
"3338"
"3339"
"3340"
"3341"
"3342"
"3343"
"3344"
"3345"
"3346"
"3347"
"3348"
"3349"
"3350"
"3351"
"3352"
"3353"
"3354"
"3355"
"3356"
"3357"
"3358"
"3359"
"3360"
"3361"
"3362"
"3363"
"3364"
"3365"
"3366"
"3367"
"3368"
"3369"
"3370"
"3371"
"3372"
"3373"
"3374"
"3375"
"3376"
"3377"
"3378"
"3379"
"3380"
"3381"
"3382"
"3383"
"3384"
"3385"
"3386"
"3387"
"3388"
"3389"
"3390"
"3391"
"3392"
"3393"
"3394"
"3395"
"3396"
"3397"
"3398"
"3399"
"3400"
"3401"
"3402"
"3403"
"3404"
"3405"
"3406"
"3407"
"3408"
"3409"
"3410"
"3411"
"3412"
"3413"
"3414"
"3415"
"3416"
"3417"
"3418"
"3419"
"3420"
"3421"
"3422"
"3423"
"3424"
"3425"
"3426"
"3427"
"3428"
"3429"
"3430"
"3431"
"3432"
"3433"
"3434"
"3435"
"3436"
"3437"
"3438"
"3439"
"3440"
"3441"
"3442"
"3443"
"3444"
"3445"
"3446"
"3447"
"3448"
"3449"
"3450"
"3451"
"3452"
"3453"
"3454"
"3455"
"3456"
"3457"
"3458"
"3459"
"3460"
"3461"
"3462"
"3463"
"3464"
"3465"
"3466"
"3467"
"3468"
"3469"
"3470"
"3471"
"3472"
"3473"
"3474"
"3475"
"3476"
"3477"
"3478"
"3479"
"3480"
"3481"
"3482"
"3483"
"3484"
"3485"
"3486"
"3487"
"3488"
"3489"
"3490"
"3491"
"3492"
"3493"
"3494"
"3495"
"3496"
"3497"
"3498"
"3499"
"3500"
"3501"
"3502"
"3503"
"3504"
"3505"
"3506"
"3507"
"3508"
"3509"
"3510"
"3511"
"3512"
"3513"
"3514"
"3515"
"3516"
"3517"
"3518"
"3519"
"3520"
"3521"
"3522"
"3523"
"3524"
"3525"
"3526"
"3527"
"3528"
"3529"
"3530"
"3531"
"3532"
"3533"
"3534"
"3535"
"3536"
"3537"
"3538"
"3539"
"3540"
"3541"
"3542"
"3543"
"3544"
"3545"
"3546"
"3547"
"3548"
"3549"
"3550"
"3551"
"3552"
"3553"
"3554"
"3555"
"3556"
"3557"
"3558"
"3559"
"3560"
"3561"
"3562"
"3563"
"3564"
"3565"
"3566"
"3567"
"3568"
"3569"
"3570"
"3571"
"3572"
"3573"
"3574"
"3575"
"3576"
"3577"
"3578"
"3579"
"3580"
"3581"
"3582"
"3583"
"3584"
"3585"
"3586"
"3587"
"3588"
"3589"
"3590"
"3591"
"3592"
"3593"
"3594"
"3595"
"3596"
"3597"
"3598"
"3599"
"3600"
"3601"
"3602"
"3603"
"3604"
"3605"
"3606"
"3607"
"3608"
"3609"
"3610"
"3611"
"3612"
"3613"
"3614"
"3615"
"3616"
"3617"
"3618"
"3619"
"3620"
"3621"
"3622"
"3623"
"3624"
"3625"
"3626"
"3627"
"3628"
"3629"
"3630"
"3631"
"3632"
"3633"
"3634"
"3635"
"3636"
"3637"
"3638"
"3639"
"3640"
"3641"
"3642"
"3643"
"3644"
"3645"
"3646"
"3647"
"3648"
"3649"
"3650"
"3651"
"3652"
"3653"
"3654"
"3655"
"3656"
"3657"
"3658"
"3659"
"3660"
"3661"
"3662"
"3663"
"3664"
"3665"
"3666"
"3667"
"3668"
"3669"
"3670"
"3671"
"3672"
"3673"
"3674"
"3675"
"3676"
"3677"
"3678"
"3679"
"3680"
"3681"
"3682"
"3683"
"3684"
"3685"
"3686"
"3687"
"3688"
"3689"
"3690"
"3691"
"3692"
"3693"
"3694"
"3695"
"3696"
"3697"
"3698"
"3699"
"3700"
"3701"
"3702"
"3703"
"3704"
"3705"
"3706"
"3707"
"3708"
"3709"
"3710"
"3711"
"3712"
"3713"
"3714"
"3715"
"3716"
"3717"
"3718"
"3719"
"3720"
"3721"
"3722"
"3723"
"3724"
"3725"
"3726"
"3727"
"3728"
"3729"
"3730"
"3731"
"3732"
"3733"
"3734"
"3735"
"3736"
"3737"
"3738"
"3739"
"3740"
"3741"
"3742"
"3743"
"3744"
"3745"
"3746"
"3747"
"3748"
"3749"
"3750"
"3751"
"3752"
"3753"
"3754"
"3755"
"3756"
"3757"
"3758"
"3759"
"3760"
"3761"
"3762"
"3763"
"3764"
"3765"
"3766"
"3767"
"3768"
"3769"
"3770"
"3771"
"3772"
"3773"
"3774"
"3775"
"3776"
"3777"
"3778"
"3779"
"3780"
"3781"
"3782"
"3783"
"3784"
"3785"
"3786"
"3787"
"3788"
"3789"
"3790"
"3791"
"3792"
"3793"
"3794"
"3795"
"3796"
"3797"
"3798"
"3799"
"3800"
"3801"
"3802"
"3803"
"3804"
"3805"
"3806"
"3807"
"3808"
"3809"
"3810"
"3811"
"3812"
"3813"
"3814"
"3815"
"3816"
"3817"
"3818"
"3819"
"3820"
"3821"
"3822"
"3823"
"3824"
"3825"
"3826"
"3827"
"3828"
"3829"
"3830"
"3831"
"3832"
"3833"
"3834"
"3835"
"3836"
"3837"
"3838"
"3839"
"3840"
"3841"
"3842"
"3843"
"3844"
"3845"
"3846"
"3847"
"3848"
"3849"
"3850"
"3851"
"3852"
"3853"
"3854"
"3855"
"3856"
"3857"
"3858"
"3859"
"3860"
"3861"
"3862"
"3863"
"3864"
"3865"
"3866"
"3867"
"3868"
"3869"
"3870"
"3871"
"3872"
"3873"
"3874"
"3875"
"3876"
"3877"
"3878"
"3879"
"3880"
"3881"
"3882"
"3883"
"3884"
"3885"
"3886"
"3887"
"3888"
"3889"
"3890"
"3891"
"3892"
"3893"
"3894"
"3895"
"3896"
"3897"
"3898"
"3899"
"3900"
"3901"
"3902"
"3903"
"3904"
"3905"
"3906"
"3907"
"3908"
"3909"
"3910"
"3911"
"3912"
"3913"
"3914"
"3915"
"3916"
"3917"
"3918"
"3919"
"3920"
"3921"
"3922"
"3923"
"3924"
"3925"
"3926"
"3927"
"3928"
"3929"
"3930"
"3931"
"3932"
"3933"
"3934"
"3935"
"3936"
"3937"
"3938"
"3939"
"3940"
"3941"
"3942"
"3943"
"3944"
"3945"
"3946"
"3947"
"3948"
"3949"
"3950"
"3951"
"3952"
"3953"
"3954"
"3955"
"3956"
"3957"
"3958"
"3959"
"3960"
"3961"
"3962"
"3963"
"3964"
"3965"
"3966"
"3967"
"3968"
"3969"
"3970"
"3971"
"3972"
"3973"
"3974"
"3975"
"3976"
"3977"
"3978"
"3979"
"3980"
"3981"
"3982"
"3983"
"3984"
"3985"
"3986"
"3987"
"3988"
"3989"
"3990"
"3991"
"3992"
"3993"
"3994"
"3995"
"3996"
"3997"
"3998"
"3999"
"4000"
"4001"
"4002"
"4003"
"4004"
"4005"
"4006"
"4007"
"4008"
"4009"
"4010"
"4011"
"4012"
"4013"
"4014"
"4015"
"4016"
"4017"
"4018"
"4019"
"4020"
"4021"
"4022"
"4023"
"4024"
"4025"
"4026"
"4027"
"4028"
"4029"
"4030"
"4031"
"4032"
"4033"
"4034"
"4035"
"4036"
"4037"
"4038"
"4039"
"4040"
"4041"
"4042"
"4043"
"4044"
"4045"
"4046"
"4047"
"4048"
"4049"
"4050"
"4051"
"4052"
"4053"
"4054"
"4055"
"4056"
"4057"
"4058"
"4059"
"4060"
"4061"
"4062"
"4063"
"4064"
"4065"
"4066"
"4067"
"4068"
"4069"
"4070"
"4071"
"4072"
"4073"
"4074"
"4075"
"4076"
