# Supplementary material for: APP Is a Context-Sensitive Regulator of the Hippocampal Presynaptic Active Zone
Source: PLOS journal article supplement (doi:10.1371/journal.pcbi.1004832), 2016-04-19
Supplement: S6 (10.1371/journal.pcbi.1004832.s006) [file journal.pcbi.1004832.s006.cys › CytoscapeSession-2016_01_22-10_07/tables/62-Core+Network+PAZ/HIDDEN-org.cytoscape.model.CyNode-62+hidden+node.cytable]

"CyCSV-Version","1"
"SUID"
"java.lang.Long"
""
"62 hidden node",""
"72"
"73"
"74"
"75"
"76"
"77"
"78"
"79"
"80"
"81"
"82"
"83"
"84"
"85"
"86"
"87"
"88"
"89"
"90"
"91"
"92"
"93"
"94"
"95"
"96"
"97"
"98"
"99"
"100"
"101"
"102"
"103"
"104"
"105"
"106"
"107"
"108"
"109"
"110"
"111"
"112"
"113"
"114"
"115"
"116"
"117"
"118"
"119"
"120"
"121"
"122"
"123"
"124"
"125"
"126"
"127"
"128"
"129"
"130"
"131"
"132"
"133"
"134"
"135"
"136"
"137"
"138"
"139"
"140"
"141"
"142"
"143"
"144"
"145"
"146"
"147"
"148"
"149"
"150"
"151"
"152"
"153"
"154"
"155"
"156"
"157"
"158"
"159"
"160"
"161"
"162"
"163"
"164"
"165"
"166"
"167"
"168"
"169"
"170"
"171"
"172"
"173"
"174"
"175"
"176"
"177"
"178"
"179"
"180"
"181"
"182"
"183"
"184"
"185"
"186"
"187"
"188"
"189"
"190"
"191"
"192"
"193"
"194"
"195"
"196"
"197"
"198"
"199"
"200"
"201"
"202"
"203"
"204"
"205"
"206"
"207"
"208"
"209"
"210"
"211"
"212"
"213"
"214"
"215"
"216"
"217"
"218"
"219"
"220"
"221"
"222"
"223"
"224"
"225"
"226"
"227"
"228"
"229"
"230"
"231"
"232"
"233"
"234"
"235"
"236"
"237"
"238"
"239"
"240"
"241"
"242"
"243"
"244"
"245"
"246"
"247"
"248"
"249"
"250"
"251"
"252"
"253"
"254"
"255"
"256"
"257"
"258"
"259"
"260"
"261"
"262"
"263"
"264"
"265"
"266"
"267"
"268"
"269"
"270"
"271"
"272"
"273"
"274"
"275"
"276"
"277"
"278"
"279"
"280"
"281"
"282"
"283"
"284"
"285"
"286"
"287"
"288"
"289"
"290"
"291"
"292"
"293"
"294"
"295"
"296"
"297"
"298"
"299"
"300"
"301"
"302"
"303"
"304"
"305"
"306"
"307"
"308"
"309"
"310"
"311"
"312"
"313"
"314"
"315"
"316"
"317"
"318"
"319"
"320"
"321"
"322"
"323"
"324"
"325"
"326"
"327"
"328"
"329"
"330"
"331"
"332"
"333"
"334"
"335"
"336"
"337"
"338"
"339"
"340"
"341"
"342"
"343"
"344"
"345"
"346"
"347"
"348"
"349"
"350"
"351"
"352"
"353"
"354"
"355"
"356"
"357"
"358"
"359"
"360"
"361"
"362"
"363"
"364"
"365"
"366"
"367"
"368"
"369"
"370"
"371"
"372"
"373"
"374"
"375"
"376"
"377"
"378"
"379"
"380"
"381"
"382"
"383"
"384"
"385"
"386"
"387"
"388"
"389"
"390"
"391"
"392"
"393"
"394"
"395"
"396"
"397"
"398"
"399"
"400"
"401"
"402"
"403"
"404"
"405"
"406"
"407"
"408"
"409"
"410"
"411"
"412"
"413"
"414"
"415"
"416"
"417"
"418"
"419"
"420"
"421"
"422"
"423"
"424"
"425"
"426"
"427"
"428"
"429"
"430"
"431"
"432"
"433"
"434"
"435"
"436"
"437"
"438"
"439"
"440"
"441"
"442"
"443"
"444"
"445"
"446"
"447"
"448"
"449"
"450"
"451"
"452"
"453"
"454"
"455"
"456"
"457"
"458"
"459"
"460"
"461"
"462"
"463"
"464"
"465"
"466"
"467"
"468"
"469"
"470"
"471"
"472"
"473"
"474"
"475"
"476"
"477"
"478"
"479"
"480"
"481"
"482"
"483"
"484"
"485"
"486"
"487"
"488"
"489"
"490"
"491"
"492"
"493"
"494"
"495"
"496"
"497"
"498"
"499"
"500"
"501"
"502"
"503"
"504"
"505"
"506"
"507"
"508"
"509"
"510"
"511"
"512"
"513"
"514"
"515"
"516"
"517"
"518"
"519"
"520"
"521"
"522"
"523"
"524"
"525"
"526"
"527"
"528"
"529"
"530"
"531"
"532"
"533"
"534"
"535"
"536"
"537"
"538"
"539"
"540"
"541"
"542"
"543"
"544"
"545"
"546"
"547"
"548"
"549"
"550"
"551"
"552"
"553"
"554"
"555"
"556"
"557"
"558"
"559"
"560"
"561"
"562"
"563"
"564"
"565"
"566"
"567"
"568"
"569"
"570"
"571"
"572"
"573"
"574"
"575"
"576"
"577"
"578"
"579"
"580"
"581"
"582"
"583"
"584"
"585"
"586"
"587"
"588"
"589"
"590"
"591"
"592"
"593"
"594"
"595"
"596"
"597"
"598"
"599"
"600"
"601"
"602"
"603"
"604"
"605"
"606"
"607"
"608"
"609"
"610"
"611"
"612"
"613"
"614"
"615"
"616"
"617"
"618"
"619"
"620"
"621"
"622"
"623"
"624"
"625"
"626"
"627"
"628"
"629"
"630"
"631"
"632"
"633"
"634"
"635"
"636"
"637"
"638"
"639"
"640"
"641"
"642"
"643"
"644"
"645"
"646"
"647"
"648"
"649"
"650"
"651"
"652"
"653"
"654"
"655"
"656"
"657"
"658"
"659"
"660"
"661"
"662"
"663"
"664"
"665"
"666"
"667"
"668"
"669"
"670"
"671"
"672"
"673"
"674"
"675"
"676"
"677"
"678"
"679"
"680"
"681"
"682"
"683"
"684"
"685"
"686"
