# Supplementary material for: APP Is a Context-Sensitive Regulator of the Hippocampal Presynaptic Active Zone
Source: PLOS journal article supplement (doi:10.1371/journal.pcbi.1004832), 2016-04-19
Supplement: S6 (10.1371/journal.pcbi.1004832.s006) [file journal.pcbi.1004832.s006.cys › CytoscapeSession-2016_01_22-10_07/tables/62-Core+Network+PAZ/LOCAL_ATTRS-org.cytoscape.model.CyEdge-Core+Network+PAZ+default+edge.cytable]

CyCSV-Version	1
SUID	interaction	name	selected
java.lang.Long	java.lang.String	java.lang.String	java.lang.Boolean
Core Network PAZ default edge
687	pp	Q00493 (pp) P12023	false
688	pp	Q9R1V4 (pp) Q9JIA1	false
689	pp	O88342 (pp) P18760	false
690	pp	O88342 (pp) P47757	false
691	pp	O88342 (pp) Q9CVB6	false
692	pp	Q9DB73 (pp) Q91VR2	false
693	pp	O54774 (pp) Q68FD5	false
694	pp	Q8VHW2 (pp) P23819	false
695	pp	P58771 (pp) P16054	false
696	pp	Q03137 (pp) P39688	false
697	pp	Q9QYX7 (pp) Q9EQZ6	false
698	pp	P23927 (pp) P16054	false
699	pp	P80560 (pp) P18052	false
700	pp	Q9CR95 (pp) P17427	false
701	pp	Q4KMM3 (pp) P50516	false
702	pp	Q9QZF2 (pp) P12023	false
703	pp	Q91WS0 (pp) Q9CQH3	false
704	pp	Q9JIA1 (pp) Q01097	false
705	pp	P53994 (pp) Q61598	false
706	pp	D3YVF0 (pp) P48453	false
707	pp	D3YVF0 (pp) P35438	false
708	pp	Q9ES97 (pp) Q99P72	false
709	pp	Q9ES97 (pp) Q8K0T0	false
710	pp	Q9R1V7 (pp) Q9JIA1	false
711	pp	Q9R1V7 (pp) P04925	false
712	pp	Q9D6K5 (pp) Q8CHC4	false
713	pp	Q9CYT6 (pp) P40124	false
714	pp	Q04447 (pp) P63017	false
715	pp	Q9Z2W9 (pp) P23819	false
716	pp	Q63810 (pp) P48453	false
717	pp	Q61330 (pp) B9EKR1	false
718	pp	Q8K0T0 (pp) P50516	false
719	pp	Q8K0T0 (pp) Q01097	false
720	pp	Q9ERD7 (pp) P47757	false
721	pp	Q921J2 (pp) P63101	false
722	pp	Q9CQW1 (pp) P46460	false
723	pp	Q6P9K9 (pp) Q8BYM5	false
724	pp	Q6P9K9 (pp) O70589	false
725	pp	Q9CZW5 (pp) P63038	false
726	pp	Q9CZW5 (pp) Q6PB66	false
727	pp	P20152 (pp) P16054	false
728	pp	Q8BRT1 (pp) P28740	false
729	pp	Q921M7 (pp) P68510	false
730	pp	Q8R366 (pp) P04925	false
731	pp	Q61206 (pp) P63005	false
732	pp	Q03157 (pp) P12023	false
733	pp	Q03157 (pp) Q9Z268	false
734	pp	Q03157 (pp) Q9QXJ1	false
735	pp	Q03157 (pp) P04925	false
736	pp	Q8R5C5 (pp) P50516	false
737	pp	Q91VT4 (pp) Q8QZT1	false
738	pp	Q91VT4 (pp) Q9CR68	false
739	pp	Q91VT4 (pp) Q99LC5	false
740	pp	Q3THE2 (pp) Q01097	false
741	pp	Q3THE2 (pp) P68510	false
742	pp	Q920P5 (pp) P63101	false
743	pp	Q2PFD7 (pp) P63101	false
744	pp	Q7TMM9 (pp) P60879	false
745	pp	Q7TMM9 (pp) P63101	false
746	pp	Q91VR7 (pp) P14873	false
747	pp	Q9CR62 (pp) Q9DC69	false
748	pp	Q9CR62 (pp) Q9CZ13	false
749	pp	Q8CHH9 (pp) P50516	false
750	pp	P97300 (pp) Q99P72	false
751	pp	O08917 (pp) Q60634	false
752	pp	Q61316 (pp) Q60864	false
753	pp	Q9D1T0 (pp) P12023	false
754	pp	P11798 (pp) P35438	false
755	pp	P11798 (pp) P63101	false
756	pp	P11798 (pp) Q01097	false
757	pp	P11798 (pp) P35436	false
758	pp	P11798 (pp) P28652	false
759	pp	P11798 (pp) O88935	false
760	pp	P11798 (pp) Q9WU78	false
761	pp	Q8K183 (pp) P63330	false
762	pp	Q99NE5 (pp) Q9EQZ6	false
763	pp	P57780 (pp) P09103	false
764	pp	P57780 (pp) P50516	false
765	pp	Q9QY76 (pp) O35526	false
766	pp	Q9QY76 (pp) O08788	false
767	pp	Q9QY76 (pp) P61264	false
768	pp	Q9R1V6 (pp) Q9JIA1	false
769	pp	Q9R1V6 (pp) Q01097	false
770	pp	P48758 (pp) P62259	false
771	pp	Q91XV3 (pp) P06837	false
772	pp	Q91XV3 (pp) P60761	false
773	pp	Q91XV3 (pp) P26645	false
774	pp	Q91XV3 (pp) P68510	false
775	pp	P55302 (pp) Q91ZX7	false
776	pp	O88643 (pp) P60766	false
777	pp	O88643 (pp) Q68FF6	false
778	pp	O88643 (pp) Q61735	false
779	pp	O88643 (pp) P63001	false
780	pp	Q80TZ3 (pp) P50516	false
781	pp	Q80TZ3 (pp) O08585	false
782	pp	Q7TMB8 (pp) Q9JJV2	false
783	pp	Q7TMB8 (pp) P28660	false
784	pp	Q9WV55 (pp) Q62442	false
785	pp	Q9WV55 (pp) Q9QY76	false
786	pp	Q9WV55 (pp) P60879	false
787	pp	Q9WV55 (pp) P63044	false
788	pp	O55131 (pp) P42208	false
789	pp	O35136 (pp) P11627	false
790	pp	P12960 (pp) P04925	false
791	pp	P12960 (pp) P11627	false
792	pp	P12960 (pp) B9EKR1	false
793	pp	Q61699 (pp) P68369	false
794	pp	P08553 (pp) P46660	false
795	pp	P08553 (pp) P19246	false
796	pp	Q8K4Z3 (pp) Q9CZ42	false
797	pp	Q8K4Z3 (pp) Q9Z1P6	false
798	pp	P08551 (pp) P19246	false
799	pp	P08551 (pp) P63101	false
800	pp	Q8VDQ8 (pp) Q9DC69	false
801	pp	O54983 (pp) Q8VDQ8	false
802	pp	P18760 (pp) P40124	false
803	pp	Q9Z2Q6 (pp) O55131	false
804	pp	Q9Z2Q6 (pp) P42208	false
805	pp	Q9WV34 (pp) Q01097	false
806	pp	P28661 (pp) P42208	false
807	pp	P26645 (pp) P63318	false
808	pp	P84096 (pp) Q5FWK3	false
809	pp	O35143 (pp) Q91VR2	false
810	pp	O35143 (pp) Q9D3D9	false
811	pp	P63321 (pp) P35438	false
812	pp	Q8K021 (pp) Q62277	false
813	pp	Q8CI94 (pp) Q9D0F9	false
814	pp	Q8CI94 (pp) Q91ZJ5	false
815	pp	Q8CI94 (pp) P50516	false
816	pp	P48962 (pp) Q60931	false
817	pp	P43406 (pp) Q71LX4	false
818	pp	O35857 (pp) P17156	false
819	pp	O35857 (pp) P62073	false
820	pp	O35857 (pp) O35129	false
821	pp	O35857 (pp) P38647	false
822	pp	O35857 (pp) Q9D880	false
823	pp	Q61490 (pp) P01831	false
824	pp	Q9CZ42 (pp) P61922	false
825	pp	P35564 (pp) P09103	false
826	pp	P19096 (pp) Q9DCD0	false
827	pp	P19096 (pp) Q64521	false
828	pp	P19096 (pp) Q05920	false
829	pp	Q61644 (pp) P39053	false
830	pp	Q61644 (pp) Q8CHC4	false
831	pp	Q61644 (pp) P10637	false
832	pp	Q8BZ98 (pp) Q60631	false
833	pp	Q8BZ98 (pp) Q60598	false
834	pp	Q8BZ98 (pp) Q61644	false
835	pp	Q5RJI5 (pp) P62259	false
836	pp	P61164 (pp) P62259	false
837	pp	Q8R191 (pp) Q62277	false
838	pp	Q8R191 (pp) P50516	false
839	pp	O35643 (pp) O08585	false
840	pp	O35643 (pp) Q80TZ3	false
841	pp	O35643 (pp) Q60631	false
842	pp	Q99P72 (pp) Q9D1T0	false
843	pp	Q99P72 (pp) P48722	false
844	pp	Q60930 (pp) P48962	false
845	pp	Q60930 (pp) Q9WUM5	false
846	pp	Q60930 (pp) Q01097	false
847	pp	Q60930 (pp) Q9CR68	false
848	pp	P20444 (pp) P26645	false
849	pp	Q9QXS1 (pp) P63101	false
850	pp	Q9QXS1 (pp) Q64010	false
851	pp	O08599 (pp) P16546	false
852	pp	O08599 (pp) P61264	false
853	pp	Q8BW75 (pp) Q9CZS1	false
854	pp	Q8BW75 (pp) Q9DBF1	false
855	pp	O35239 (pp) P46460	false
856	pp	Q9EPJ9 (pp) P62331	false
857	pp	P00405 (pp) Q6PB66	false
858	pp	P00405 (pp) P03930	false
859	pp	P56564 (pp) P28661	false
860	pp	P56564 (pp) P63101	false
861	pp	P63318 (pp) P35438	false
862	pp	P58281 (pp) Q8K1M6	false
863	pp	Q8R3V5 (pp) Q8CHC4	false
864	pp	P67871 (pp) Q60737	false
865	pp	Q810U3 (pp) Q8C8R3	false
866	pp	P62743 (pp) O08585	false
867	pp	Q60605 (pp) Q01097	false
868	pp	P35279 (pp) Q61598	false
869	pp	Q9CRB9 (pp) P16054	false
870	pp	Q9CQI6 (pp) P60710	false
871	pp	P50396 (pp) P63011	false
872	pp	P50396 (pp) Q99PT1	false
873	pp	P50396 (pp) P07901	false
874	pp	P50396 (pp) P62821	false
875	pp	Q9WU78 (pp) Q62419	false
876	pp	Q9WU78 (pp) Q60631	false
877	pp	Q9WU78 (pp) P05480	false
878	pp	Q9WU78 (pp) Q62420	false
879	pp	P0C0A3 (pp) Q9D8B3	false
880	pp	P0C0A3 (pp) Q9WU78	false
881	pp	Q9R0P9 (pp) O55042	false
882	pp	Q9R0P9 (pp) Q99LX0	false
883	pp	Q9R0P9 (pp) P68369	false
884	pp	Q80UU9 (pp) P68510	false
885	pp	Q60875 (pp) P84096	false
886	pp	Q60875 (pp) Q8BG51	false
887	pp	Q61411 (pp) P63038	false
888	pp	Q61411 (pp) P35438	false
889	pp	Q8CHC4 (pp) P50516	false
890	pp	Q8CHC4 (pp) Q62420	false
891	pp	Q91VZ6 (pp) Q68FD5	false
892	pp	Q9WUB3 (pp) P47857	false
893	pp	Q9WUB3 (pp) Q9D0F9	false
894	pp	Q9WUB3 (pp) Q91ZJ5	false
895	pp	Q9D0F9 (pp) Q91ZJ5	false
896	pp	Q9D0F9 (pp) P17710	false
897	pp	Q6PIC6 (pp) P04925	false
898	pp	Q6PIC6 (pp) Q01097	false
899	pp	Q80VP1 (pp) Q9Z0R4	false
900	pp	P68181 (pp) P63101	false
901	pp	P68181 (pp) P35438	false
902	pp	P68181 (pp) P12367	false
903	pp	P28663 (pp) P46460	false
904	pp	P41216 (pp) Q99JY0	false
905	pp	Q9D6F9 (pp) P50516	false
906	pp	Q99MR8 (pp) Q99MN9	false
907	pp	Q8BH04 (pp) P17182	false
908	pp	Q8BH04 (pp) Q05920	false
909	pp	Q8BWF0 (pp) Q05920	false
910	pp	Q8BWF0 (pp) P61922	false
911	pp	Q8BWF0 (pp) P70404	false
912	pp	Q8BWF0 (pp) Q60597	false
913	pp	Q91WC3 (pp) P50516	false
914	pp	Q3UVX5 (pp) P35438	false
915	pp	Q3UVX5 (pp) P62204	false
916	pp	Q3UVX5 (pp) P04925	false
917	pp	P20357 (pp) P14873	false
918	pp	P20357 (pp) P12367	false
919	pp	P20357 (pp) O88935	false
920	pp	P20357 (pp) Q9ERD7	false
921	pp	P20357 (pp) P11798	false
922	pp	P20357 (pp) Q6PHZ2	false
923	pp	P20357 (pp) P35438	false
924	pp	Q9D8B3 (pp) Q9WU78	false
925	pp	O55042 (pp) O35526	false
926	pp	P63328 (pp) P63137	false
927	pp	P63328 (pp) Q63810	false
928	pp	P63328 (pp) O35465	false
929	pp	P63328 (pp) P35438	false
930	pp	P63328 (pp) P22723	false
931	pp	Q62419 (pp) Q9D8B3	false
932	pp	Q62419 (pp) P39053	false
933	pp	Q62419 (pp) Q7TQF7	false
934	pp	P45376 (pp) P16054	false
935	pp	O54991 (pp) Q99P72	false
936	pp	B9EKR1 (pp) O54991	false
937	pp	Q9QYR6 (pp) Q91VR7	false
938	pp	O08585 (pp) Q80VP1	false
939	pp	O08585 (pp) Q91VR2	false
940	pp	Q60932 (pp) P48962	false
941	pp	Q60932 (pp) Q01097	false
942	pp	Q60932 (pp) P16054	false
943	pp	Q60932 (pp) P17710	false
944	pp	Q60932 (pp) Q99LX0	false
945	pp	Q3UHL1 (pp) P60761	false
946	pp	Q3UHL1 (pp) P63101	false
947	pp	Q9CPQ1 (pp) P56391	false
948	pp	Q9CPQ1 (pp) P00405	false
949	pp	Q9CPQ1 (pp) Q9D855	false
950	pp	Q9CPQ1 (pp) Q9DB20	false
951	pp	Q9CPQ1 (pp) Q9CQZ5	false
952	pp	Q9CPQ1 (pp) P43024	false
953	pp	Q9CPQ1 (pp) P56379	false
954	pp	Q9CPQ1 (pp) Q9CQH3	false
955	pp	Q9CPQ1 (pp) Q9CQQ7	false
956	pp	Q9CPQ1 (pp) Q9CQZ6	false
957	pp	Q9CPQ1 (pp) Q9D3D9	false
958	pp	Q9CPQ1 (pp) Q99LY9	false
959	pp	Q9CPQ1 (pp) P97450	false
960	pp	Q9CPQ1 (pp) Q9CQJ8	false
961	pp	Q9CPQ1 (pp) Q9DB77	false
962	pp	Q9CPQ1 (pp) P17665	false
963	pp	Q9CPQ1 (pp) P48771	false
964	pp	Q9CPQ1 (pp) Q9CPP6	false
965	pp	Q9CPQ1 (pp) Q9CQ69	false
966	pp	Q9CPQ1 (pp) Q9DCX2	false
967	pp	Q9CPQ1 (pp) Q9D6J6	false
968	pp	Q9CPQ1 (pp) Q03265	false
969	pp	Q9CPQ1 (pp) P19783	false
970	pp	Q9CPQ1 (pp) Q06185	false
971	pp	Q9CPQ1 (pp) Q91VR2	false
972	pp	Q9CPQ1 (pp) Q9ERS2	false
973	pp	Q5SQX6 (pp) P28660	false
974	pp	Q80Y14 (pp) Q99KI0	false
975	pp	Q80Y14 (pp) Q99KB8	false
976	pp	Q80Y14 (pp) Q9DCB8	false
977	pp	Q80Y14 (pp) P99029	false
978	pp	Q9Z0R4 (pp) P50516	false
979	pp	Q9Z0R4 (pp) P39053	false
980	pp	P00493 (pp) P04925	false
981	pp	P00493 (pp) Q9R0Y5	false
982	pp	P00493 (pp) P06151	false
983	pp	P00493 (pp) P17742	false
984	pp	P00493 (pp) P52480	false
985	pp	P00493 (pp) Q9R111	false
986	pp	P00493 (pp) Q99LC5	false
987	pp	P60761 (pp) P06837	false
988	pp	Q64332 (pp) P46460	false
989	pp	Q64332 (pp) Q9JJV2	false
990	pp	Q64332 (pp) P62259	false
991	pp	Q64332 (pp) P60761	false
992	pp	O70318 (pp) O70589	false
993	pp	O70318 (pp) P63001	false
994	pp	O08539 (pp) Q8BZ98	false
995	pp	O08539 (pp) Q8R3V5	false
996	pp	O08539 (pp) P10637	false
997	pp	Q9CS84 (pp) O70589	false
998	pp	Q9CS84 (pp) O88952	false
999	pp	Q9CS84 (pp) Q8BYM5	false
1000	pp	Q9JIS5 (pp) Q68FF6	false
1001	pp	Q4ACU6 (pp) Q60631	false
1002	pp	Q4ACU6 (pp) Q8BYM5	false
1003	pp	P48453 (pp) P63328	false
1004	pp	P48453 (pp) P62204	false
1005	pp	P48453 (pp) P63101	false
1006	pp	Q925I1 (pp) O35658	false
1007	pp	Q62261 (pp) P13595	false
1008	pp	Q62261 (pp) Q810U4	false
1009	pp	Q62261 (pp) P16546	false
1010	pp	Q62261 (pp) Q01097	false
1011	pp	Q62261 (pp) P35438	false
1012	pp	Q62261 (pp) P63101	false
1013	pp	Q9R0N7 (pp) Q9Z0P4	false
1014	pp	Q9R0N7 (pp) P60879	false
1015	pp	P30999 (pp) Q60598	false
1016	pp	P30999 (pp) P35438	false
1017	pp	P30999 (pp) Q02248	false
1018	pp	Q68FF6 (pp) P62204	false
1019	pp	Q68FF6 (pp) B9EKR1	false
1020	pp	Q68FF6 (pp) P63101	false
1021	pp	P23818 (pp) P23819	false
1022	pp	P23818 (pp) Q3UVX5	false
1023	pp	P23818 (pp) P35438	false
1024	pp	P23818 (pp) P35436	false
1025	pp	Q9DBJ1 (pp) P52480	false
1026	pp	Q9DBJ1 (pp) P17182	false
1027	pp	Q9DBJ1 (pp) P17751	false
1028	pp	Q9DBJ1 (pp) Q99K85	false
1029	pp	Q9DBJ1 (pp) P06745	false
1030	pp	Q9DBJ1 (pp) P09411	false
1031	pp	Q9DBJ1 (pp) Q93092	false
1032	pp	P68254 (pp) P10637	false
1033	pp	P62204 (pp) P63101	false
1034	pp	P62204 (pp) O70589	false
1035	pp	P62204 (pp) P63328	false
1036	pp	P62204 (pp) P35438	false
1037	pp	Q99K85 (pp) O88712	false
1038	pp	Q99K85 (pp) Q91Z53	false
1039	pp	P28652 (pp) Q01097	false
1040	pp	P28652 (pp) Q6PHZ2	false
1041	pp	P28652 (pp) P35436	false
1042	pp	P28652 (pp) P23819	false
1043	pp	Q6PIE5 (pp) P70414	false
1044	pp	P47802 (pp) O88441	false
1045	pp	Q9R0Y5 (pp) Q9DCD0	false
1046	pp	Q9QXJ1 (pp) P12023	false
1047	pp	Q9QXJ1 (pp) P04925	false
1048	pp	P84091 (pp) Q9DBG3	false
1049	pp	P84091 (pp) Q6IRU5	false
1050	pp	P84091 (pp) P62743	false
1051	pp	P84091 (pp) Q80VP1	false
1052	pp	P84091 (pp) O08585	false
1053	pp	P84091 (pp) Q68FD5	false
1054	pp	P84091 (pp) P50516	false
1055	pp	P84091 (pp) P17426	false
1056	pp	P99024 (pp) P60879	false
1057	pp	P99024 (pp) Q6PER3	false
1058	pp	P99024 (pp) O70589	false
1059	pp	P03995 (pp) P63101	false
1060	pp	P03995 (pp) Q9QXS1	false
1061	pp	O70589 (pp) O88935	false
1062	pp	O70589 (pp) O08599	false
1063	pp	O70589 (pp) P60469	false
1064	pp	O70589 (pp) P16330	false
1065	pp	Q8BKX1 (pp) P28660	false
1066	pp	Q8BKX1 (pp) P62259	false
1067	pp	P13595 (pp) P16546	false
1068	pp	P13595 (pp) P04925	false
1069	pp	P13595 (pp) Q9CQV8	false
1070	pp	P11627 (pp) P13595	false
1071	pp	P62746 (pp) P63330	false
1072	pp	P62746 (pp) Q5FWK3	false
1073	pp	P62746 (pp) Q8BG51	false
1074	pp	Q8VD37 (pp) P17426	false
1075	pp	Q8VD37 (pp) P35564	false
1076	pp	Q8VD37 (pp) Q62420	false
1077	pp	Q8QZT1 (pp) Q99LC5	false
1078	pp	Q8QZT1 (pp) Q8BMF4	false
1079	pp	Q8QZT1 (pp) Q8BWT1	false
1080	pp	Q8QZT1 (pp) Q9DBL1	false
1081	pp	Q8QZT1 (pp) Q9D0K2	false
1082	pp	Q8QZT1 (pp) O08756	false
1083	pp	Q8QZT1 (pp) Q99JY0	false
1084	pp	Q8QZT1 (pp) Q9WUM5	false
1085	pp	Q8QZT1 (pp) Q9D2G2	false
1086	pp	Q8QZT1 (pp) Q8BMS1	false
1087	pp	Q60931 (pp) Q9CQH3	false
1088	pp	Q60931 (pp) Q9D6J6	false
1089	pp	Q9JLZ3 (pp) Q99MR8	false
1090	pp	Q9JLZ3 (pp) Q8BH95	false
1091	pp	Q9JLZ3 (pp) Q9JLJ2	false
1092	pp	Q9JLZ3 (pp) Q61425	false
1093	pp	Q9JLZ3 (pp) Q3ULD5	false
1094	pp	Q8VDP6 (pp) O55023	false
1095	pp	Q8VDP6 (pp) P63082	false
1096	pp	Q8VDP6 (pp) Q9Z1B3	false
1097	pp	Q8VDP6 (pp) Q99L43	false
1098	pp	Q9Z0X1 (pp) P17742	false
1099	pp	Q9Z0X1 (pp) Q8K1M6	false
1100	pp	Q60598 (pp) Q9JM76	false
1101	pp	Q60598 (pp) Q5FWK3	false
1102	pp	Q60598 (pp) P23819	false
1103	pp	Q60598 (pp) P59999	false
1104	pp	Q60598 (pp) P63085	false
1105	pp	Q60598 (pp) Q01097	false
1106	pp	Q60598 (pp) P35438	false
1107	pp	Q60598 (pp) Q9CVB6	false
1108	pp	Q60598 (pp) Q80Z38	false
1109	pp	Q60598 (pp) P05480	false
1110	pp	Q60598 (pp) P61161	false
1111	pp	P63011 (pp) P47708	false
1112	pp	P63011 (pp) P35438	false
1113	pp	P63011 (pp) Q99NE5	false
1114	pp	P38647 (pp) Q60864	false
1115	pp	P38647 (pp) Q8JZQ2	false
1116	pp	P38647 (pp) P63038	false
1117	pp	P38647 (pp) Q9QYJ0	false
1118	pp	P38647 (pp) P63101	false
1119	pp	Q62425 (pp) Q9CQH3	false
1120	pp	Q62425 (pp) Q99LX0	false
1121	pp	Q62425 (pp) Q9CQ69	false
1122	pp	Q62425 (pp) P68510	false
1123	pp	Q62425 (pp) Q3UIU2	false
1124	pp	Q62425 (pp) P16054	false
1125	pp	Q62425 (pp) O09111	false
1126	pp	Q62425 (pp) Q9Z1P6	false
1127	pp	Q62425 (pp) Q9DCJ5	false
1128	pp	Q62425 (pp) Q9CQ54	false
1129	pp	Q62425 (pp) Q9DCS9	false
1130	pp	Q8BMF3 (pp) Q05920	false
1131	pp	Q8BMF3 (pp) P52480	false
1132	pp	Q8BMF3 (pp) P06151	false
1133	pp	Q9DCB8 (pp) Q9D6J6	false
1134	pp	Q9DCB8 (pp) Q99KI0	false
1135	pp	Q9DCB8 (pp) Q9Z1J3	false
1136	pp	O88712 (pp) Q62420	false
1137	pp	Q8BHL5 (pp) Q60631	false
1138	pp	Q9QXS6 (pp) P62259	false
1139	pp	P17183 (pp) P06745	false
1140	pp	P17183 (pp) P56480	false
1141	pp	P17183 (pp) Q93092	false
1142	pp	P17183 (pp) P52480	false
1143	pp	P17183 (pp) P09411	false
1144	pp	P17183 (pp) Q8BH04	false
1145	pp	P17183 (pp) P17751	false
1146	pp	P17183 (pp) P05063	false
1147	pp	P17183 (pp) Q9DBJ1	false
1148	pp	P17183 (pp) P05064	false
1149	pp	P17183 (pp) P40142	false
1150	pp	Q6IRU5 (pp) Q61548	false
1151	pp	Q6IRU5 (pp) P17426	false
1152	pp	Q6IRU5 (pp) P62743	false
1153	pp	Q9DBG3 (pp) Q80VP1	false
1154	pp	Q9DBG3 (pp) P60879	false
1155	pp	Q9DBG3 (pp) P62743	false
1156	pp	Q9DBG3 (pp) P63101	false
1157	pp	Q9DBG3 (pp) P17426	false
1158	pp	Q9DBG3 (pp) Q68FD5	false
1159	pp	Q9DBG3 (pp) O70161	false
1160	pp	Q9DBG3 (pp) O08585	false
1161	pp	Q9DBG3 (pp) Q6IRU5	false
1162	pp	P10637 (pp) Q99LX0	false
1163	pp	P10637 (pp) Q9D8Y0	false
1164	pp	P10637 (pp) Q9QXJ1	false
1165	pp	P10637 (pp) O55042	false
1166	pp	P10637 (pp) P04925	false
1167	pp	P10637 (pp) P12023	false
1168	pp	Q922R8 (pp) P12023	false
1169	pp	P47857 (pp) Q9R0Y5	false
1170	pp	P47857 (pp) P05063	false
1171	pp	P47857 (pp) P05064	false
1172	pp	P47857 (pp) P63101	false
1173	pp	Q62048 (pp) P63085	false
1174	pp	Q99104 (pp) P35438	false
1175	pp	Q99104 (pp) P63101	false
1176	pp	Q99104 (pp) P08551	false
1177	pp	Q99104 (pp) P03995	false
1178	pp	Q99104 (pp) Q01097	false
1179	pp	P60766 (pp) Q8BG51	false
1180	pp	P60766 (pp) Q5FWK3	false
1181	pp	P60766 (pp) Q99PT1	false
1182	pp	P60766 (pp) P63005	false
1183	pp	Q6R891 (pp) P63101	false
1184	pp	Q6R891 (pp) Q60875	false
1185	pp	Q6R891 (pp) Q62277	false
1186	pp	P62835 (pp) P35438	false
1187	pp	Q8BLK3 (pp) P04925	false
1188	pp	Q91ZX7 (pp) Q9D6K5	false
1189	pp	Q91ZX7 (pp) P12023	false
1190	pp	P08226 (pp) P20357	false
1191	pp	P08226 (pp) P10637	false
1192	pp	P08226 (pp) P12023	false
1193	pp	P08226 (pp) P04925	false
1194	pp	P08226 (pp) Q91ZX7	false
1195	pp	Q8R0S4 (pp) Q9D6F9	false
1196	pp	Q61290 (pp) Q8R0S4	false
1197	pp	P42125 (pp) Q99JY0	false
1198	pp	P42125 (pp) Q8K1Z0	false
1199	pp	P42125 (pp) Q8BH95	false
1200	pp	P42125 (pp) Q91YT0	false
1201	pp	P42125 (pp) Q9CQ62	false
1202	pp	P42125 (pp) O08756	false
1203	pp	P42125 (pp) Q9DCJ5	false
1204	pp	P42125 (pp) Q99LC5	false
1205	pp	P42125 (pp) P51174	false
1206	pp	P42125 (pp) Q61425	false
1207	pp	P42125 (pp) O09111	false
1208	pp	P42125 (pp) Q8BMS1	false
1209	pp	P42125 (pp) Q9JHI5	false
1210	pp	P42125 (pp) Q9Z1P6	false
1211	pp	Q8BGD5 (pp) P50544	false
1212	pp	Q9Z268 (pp) Q06335	false
1213	pp	P17182 (pp) Q9DCD0	false
1214	pp	P17182 (pp) Q9WUA3	false
1215	pp	P17182 (pp) P63101	false
1216	pp	Q9CPW4 (pp) Q9JM76	false
1217	pp	Q9CPW4 (pp) P59999	false
1218	pp	Q8BKZ9 (pp) P97807	false
1219	pp	Q8BKZ9 (pp) Q60597	false
1220	pp	Q8BKZ9 (pp) Q9D051	false
1221	pp	Q8BKZ9 (pp) Q922H2	false
1222	pp	Q8BKZ9 (pp) P35486	false
1223	pp	Q8BKZ9 (pp) Q8BMF4	false
1224	pp	P05063 (pp) P17182	false
1225	pp	P05063 (pp) Q91VR2	false
1226	pp	P05063 (pp) P17710	false
1227	pp	P05063 (pp) Q9WUA3	false
1228	pp	Q9WUA3 (pp) P63101	false
1229	pp	P61982 (pp) P35438	false
1230	pp	P61982 (pp) P10637	false
1231	pp	P61982 (pp) Q9DC28	false
1232	pp	P61982 (pp) P62259	false
1233	pp	P61982 (pp) P63101	false
1234	pp	P07901 (pp) Q61699	false
1235	pp	P07901 (pp) Q60864	false
1236	pp	P07901 (pp) Q9DC28	false
1237	pp	P07901 (pp) Q99KJ8	false
1238	pp	P07901 (pp) P63038	false
1239	pp	P07901 (pp) Q9CR16	false
1240	pp	P07901 (pp) P62259	false
1241	pp	P07901 (pp) P63037	false
1242	pp	P07901 (pp) P11499	false
1243	pp	P07901 (pp) P61982	false
1244	pp	P06837 (pp) P62204	false
1245	pp	P15116 (pp) P30999	false
1246	pp	P15116 (pp) P23242	false
1247	pp	P15116 (pp) P35438	false
1248	pp	P15116 (pp) Q02248	false
1249	pp	Q7TQF7 (pp) Q62420	false
1250	pp	Q7TQF7 (pp) Q8BZ98	false
1251	pp	Q7TQF7 (pp) Q9DBG3	false
1252	pp	Q7TQF7 (pp) P39053	false
1253	pp	Q7TQF7 (pp) Q8CHC4	false
1254	pp	Q7TQF7 (pp) Q9EP69	false
1255	pp	Q7TQF7 (pp) Q68FD5	false
1256	pp	Q7TQF7 (pp) P17427	false
1257	pp	Q99L47 (pp) P63038	false
1258	pp	P29758 (pp) P15105	false
1259	pp	P29758 (pp) P12023	false
1260	pp	Q8CHT0 (pp) P15105	false
1261	pp	Q8CHT0 (pp) Q9DBF1	false
1262	pp	Q8CHT0 (pp) P29758	false
1263	pp	P97772 (pp) P35438	false
1264	pp	P97772 (pp) Q3UHD9	false
1265	pp	P31324 (pp) P68181	false
1266	pp	P31324 (pp) P35438	false
1267	pp	P31324 (pp) P63101	false
1268	pp	P31324 (pp) P20357	false
1269	pp	P31324 (pp) P12367	false
1270	pp	P31324 (pp) Q8BR92	false
1271	pp	Q6PB66 (pp) P68510	false
1272	pp	P39053 (pp) Q8CHC4	false
1273	pp	P39053 (pp) Q9CQ92	false
1274	pp	P39053 (pp) O08539	false
1275	pp	P39053 (pp) P35438	false
1276	pp	P39053 (pp) P28740	false
1277	pp	P39053 (pp) P17426	false
1278	pp	P39053 (pp) Q68FD5	false
1279	pp	P39053 (pp) P04925	false
1280	pp	Q6PH08 (pp) Q99NE5	false
1281	pp	Q6PH08 (pp) P62259	false
1282	pp	O88737 (pp) Q99NE5	false
1283	pp	O88737 (pp) Q6PH08	false
1284	pp	Q9CQC7 (pp) Q9D6J6	false
1285	pp	Q9CQC7 (pp) Q9CQQ7	false
1286	pp	Q9CQC7 (pp) Q91YT0	false
1287	pp	Q9CQC7 (pp) Q9DCS9	false
1288	pp	Q9CQC7 (pp) Q3UIU2	false
1289	pp	Q9CQC7 (pp) Q99LC3	false
1290	pp	Q9CQC7 (pp) Q62425	false
1291	pp	Q9CQC7 (pp) Q99LY9	false
1292	pp	Q9CQC7 (pp) Q9D6J5	false
1293	pp	Q9CQC7 (pp) Q8K3J1	false
1294	pp	Q9CQC7 (pp) Q9CQH3	false
1295	pp	Q9CQC7 (pp) Q9DCJ5	false
1296	pp	Q9CQC7 (pp) Q9CQZ6	false
1297	pp	Q9CQC7 (pp) Q9DC69	false
1298	pp	Q9CQC7 (pp) Q9Z1P6	false
1299	pp	Q9CQC7 (pp) Q06185	false
1300	pp	Q9CQC7 (pp) Q9CQ54	false
1301	pp	Q9CVB6 (pp) P59999	false
1302	pp	Q9CVB6 (pp) P47757	false
1303	pp	Q9CVB6 (pp) Q9D898	false
1304	pp	Q9CVB6 (pp) Q99JY9	false
1305	pp	Q9CVB6 (pp) P60710	false
1306	pp	Q9CVB6 (pp) Q9R0Q6	false
1307	pp	Q9CVB6 (pp) P67871	false
1308	pp	Q9CVB6 (pp) Q9CPW4	false
1309	pp	Q9CVB6 (pp) Q9JM76	false
1310	pp	Q5FWK3 (pp) Q9QUI0	false
1311	pp	Q5FWK3 (pp) P63005	false
1312	pp	Q9WTT4 (pp) P63082	false
1313	pp	Q9WTT4 (pp) P50516	false
1314	pp	Q00612 (pp) P06745	false
1315	pp	Q00612 (pp) Q9DCD0	false
1316	pp	Q00612 (pp) P17751	false
1317	pp	Q00612 (pp) P97807	false
1318	pp	Q00612 (pp) P09671	false
1319	pp	Q00612 (pp) P40142	false
1320	pp	Q00612 (pp) Q93092	false
1321	pp	Q9D6J5 (pp) Q9CPQ8	false
1322	pp	Q9D6J5 (pp) Q91YT0	false
1323	pp	Q9D6J5 (pp) Q9DC69	false
1324	pp	Q9D6J5 (pp) Q9D3D9	false
1325	pp	Q9D6J5 (pp) Q9CQQ7	false
1326	pp	Q9D6J5 (pp) Q9CQZ6	false
1327	pp	Q9D6J5 (pp) O09111	false
1328	pp	Q9D6J5 (pp) Q9ERS2	false
1329	pp	Q9D6J5 (pp) Q9DCJ5	false
1330	pp	Q9D6J5 (pp) Q9CQ69	false
1331	pp	Q9D6J5 (pp) Q9DB77	false
1332	pp	Q9D6J5 (pp) Q99LC3	false
1333	pp	Q9D6J5 (pp) Q9DCS9	false
1334	pp	Q9D6J5 (pp) Q3UIU2	false
1335	pp	Q9D6J5 (pp) Q06185	false
1336	pp	Q9D6J5 (pp) Q9CZ13	false
1337	pp	Q9D6J5 (pp) Q9D6J6	false
1338	pp	Q9D6J5 (pp) Q8K3J1	false
1339	pp	Q9D6J5 (pp) Q99LX0	false
1340	pp	Q9D6J5 (pp) Q9CQH3	false
1341	pp	Q9D6J5 (pp) Q9Z1P6	false
1342	pp	Q9D6J5 (pp) Q9CQ54	false
1343	pp	Q9D6J5 (pp) Q91VD9	false
1344	pp	Q9D6J5 (pp) Q91VR2	false
1345	pp	P23506 (pp) Q9CQH3	false
1346	pp	Q6PCP5 (pp) P23506	false
1347	pp	Q8VDN2 (pp) P35438	false
1348	pp	Q8VDN2 (pp) P14094	false
1349	pp	Q8VDN2 (pp) Q01097	false
1350	pp	Q8VDN2 (pp) P63044	false
1351	pp	Q8VDN2 (pp) P70414	false
1352	pp	Q8VDN2 (pp) P60879	false
1353	pp	Q8VDN2 (pp) P23819	false
1354	pp	Q9QWI6 (pp) Q68FF6	false
1355	pp	Q9QWI6 (pp) P05480	false
1356	pp	Q9QWI6 (pp) Q8R001	false
1357	pp	P63101 (pp) Q64332	false
1358	pp	P63101 (pp) P10637	false
1359	pp	P63101 (pp) P20357	false
1360	pp	P63101 (pp) P08553	false
1361	pp	P63101 (pp) Q80U28	false
1362	pp	P63101 (pp) P17156	false
1363	pp	P63101 (pp) P47757	false
1364	pp	P63101 (pp) Q8BPN8	false
1365	pp	P63101 (pp) P16546	false
1366	pp	P63101 (pp) P13020	false
1367	pp	P63101 (pp) F6SEU4	false
1368	pp	P63101 (pp) Q60875	false
1369	pp	P63101 (pp) Q920I9	false
1370	pp	P63101 (pp) Q9R0K7	false
1371	pp	P63101 (pp) P30999	false
1372	pp	P63101 (pp) P60469	false
1373	pp	P63101 (pp) P12367	false
1374	pp	P63101 (pp) P16330	false
1375	pp	P63101 (pp) P28652	false
1376	pp	P63101 (pp) Q7TSJ2	false
1377	pp	P63101 (pp) Q925I1	false
1378	pp	P63101 (pp) P28740	false
1379	pp	P63101 (pp) P46660	false
1380	pp	P63101 (pp) O88935	false
1381	pp	P63101 (pp) Q62465	false
1382	pp	P63101 (pp) P63328	false
1383	pp	P63101 (pp) P62482	false
1384	pp	Q61879 (pp) P35438	false
1385	pp	Q61879 (pp) P63101	false
1386	pp	Q91ZA3 (pp) Q99JY0	false
1387	pp	Q91ZA3 (pp) Q9EQ20	false
1388	pp	Q3UMR5 (pp) P50516	false
1389	pp	P56382 (pp) Q03265	false
1390	pp	P56382 (pp) Q91VM9	false
1391	pp	P56382 (pp) Q91VR2	false
1392	pp	P56382 (pp) P56480	false
1393	pp	P56382 (pp) Q9D3D9	false
1394	pp	P56382 (pp) Q9CQZ5	false
1395	pp	P56382 (pp) P03930	false
1396	pp	P56382 (pp) Q9CQQ7	false
1397	pp	P56382 (pp) Q9DB20	false
1398	pp	P56382 (pp) Q99LX0	false
1399	pp	P56382 (pp) Q9DCX2	false
1400	pp	P56382 (pp) Q06185	false
1401	pp	P56382 (pp) P97450	false
1402	pp	P09103 (pp) Q922R8	false
1403	pp	P09103 (pp) P04925	false
1404	pp	P09103 (pp) P63038	false
1405	pp	P14873 (pp) Q9QYR6	false
1406	pp	P14873 (pp) P63005	false
1407	pp	P14873 (pp) P62259	false
1408	pp	P43024 (pp) Q9ERS2	false
1409	pp	P43024 (pp) P56391	false
1410	pp	P43024 (pp) Q9DCX2	false
1411	pp	P43024 (pp) Q9D3D9	false
1412	pp	P43024 (pp) P00405	false
1413	pp	P43024 (pp) Q91VR2	false
1414	pp	P43024 (pp) Q9CQ69	false
1415	pp	Q62420 (pp) P39053	false
1416	pp	Q62420 (pp) O08585	false
1417	pp	Q9EP69 (pp) Q8CHC4	false
1418	pp	Q9EP69 (pp) Q68FD5	false
1419	pp	Q9EP69 (pp) Q62420	false
1420	pp	P26040 (pp) P11627	false
1421	pp	P70441 (pp) P26040	false
1422	pp	P61264 (pp) P63044	false
1423	pp	Q7TPR4 (pp) Q2PFD7	false
1424	pp	Q3UTJ2 (pp) O08917	false
1425	pp	Q3UTJ2 (pp) Q7TPR4	false
1426	pp	P06745 (pp) P17710	false
1427	pp	P06745 (pp) P05063	false
1428	pp	P06745 (pp) P09411	false
1429	pp	P06745 (pp) P16858	false
1430	pp	P06745 (pp) P06151	false
1431	pp	P06745 (pp) Q9D0F9	false
1432	pp	P06745 (pp) Q9DCD0	false
1433	pp	P06745 (pp) P17182	false
1434	pp	P06745 (pp) O55023	false
1435	pp	P06745 (pp) P47857	false
1436	pp	P06745 (pp) Q05920	false
1437	pp	P06745 (pp) Q9WUM5	false
1438	pp	P06745 (pp) Q9WUA3	false
1439	pp	P06745 (pp) P05064	false
1440	pp	Q920I9 (pp) Q8BPN8	false
1441	pp	Q923T9 (pp) P63101	false
1442	pp	Q923T9 (pp) P35436	false
1443	pp	P63040 (pp) P63044	false
1444	pp	Q61831 (pp) Q01097	false
1445	pp	Q61831 (pp) P35438	false
1446	pp	P50544 (pp) Q8BMS1	false
1447	pp	P50544 (pp) Q91WC3	false
1448	pp	P50544 (pp) P41216	false
1449	pp	Q9Z2I9 (pp) Q99LC5	false
1450	pp	Q9Z2I9 (pp) P97807	false
1451	pp	Q9Z2I9 (pp) Q9D023	false
1452	pp	Q9Z2I9 (pp) Q9D2G2	false
1453	pp	Q9Z2I9 (pp) P50516	false
1454	pp	Q9Z2I9 (pp) Q8R4N0	false
1455	pp	Q9Z2I9 (pp) Q03265	false
1456	pp	Q9Z2I9 (pp) Q8CAQ8	false
1457	pp	Q9Z2I9 (pp) Q91VD9	false
1458	pp	Q9Z2I9 (pp) P23506	false
1459	pp	Q9Z2I9 (pp) Q9WUM5	false
1460	pp	Q9Z2I9 (pp) Q60597	false
1461	pp	Q61301 (pp) P15116	false
1462	pp	Q9DB05 (pp) P46460	false
1463	pp	P52480 (pp) P17710	false
1464	pp	P52480 (pp) P06745	false
1465	pp	P52480 (pp) P05064	false
1466	pp	P52480 (pp) Q05920	false
1467	pp	P52480 (pp) Q9WUB3	false
1468	pp	P52480 (pp) P06151	false
1469	pp	P52480 (pp) Q9DCD0	false
1470	pp	P52480 (pp) P09411	false
1471	pp	P52480 (pp) P05063	false
1472	pp	P52480 (pp) Q8BH04	false
1473	pp	P52480 (pp) Q9WUA3	false
1474	pp	P52480 (pp) P47857	false
1475	pp	P52480 (pp) Q9R0Y5	false
1476	pp	P52480 (pp) P17182	false
1477	pp	P52480 (pp) P54071	false
1478	pp	Q93092 (pp) P97807	false
1479	pp	Q93092 (pp) P05063	false
1480	pp	Q93092 (pp) P05064	false
1481	pp	Q93092 (pp) P06745	false
1482	pp	Q93092 (pp) Q9D0F9	false
1483	pp	Q93092 (pp) P17710	false
1484	pp	Q93092 (pp) Q9WUA3	false
1485	pp	Q93092 (pp) P17182	false
1486	pp	Q93092 (pp) Q9DCD0	false
1487	pp	Q93092 (pp) P06151	false
1488	pp	Q93092 (pp) P47857	false
1489	pp	Q93092 (pp) P52480	false
1490	pp	Q9JHI5 (pp) Q99LC5	false
1491	pp	Q9JHI5 (pp) Q61425	false
1492	pp	Q9JHI5 (pp) Q99MR8	false
1493	pp	Q9JHI5 (pp) Q8BMS1	false
1494	pp	P53395 (pp) Q9DBL1	false
1495	pp	P53395 (pp) Q3ULD5	false
1496	pp	P53395 (pp) Q9D051	false
1497	pp	P53395 (pp) Q99MN9	false
1498	pp	P53395 (pp) Q60597	false
1499	pp	P53395 (pp) Q8K2B3	false
1500	pp	P53395 (pp) P35486	false
1501	pp	P53395 (pp) Q9WUM5	false
1502	pp	P53395 (pp) O08749	false
1503	pp	P53395 (pp) Q9JHI5	false
1504	pp	Q9DBL1 (pp) Q8BMS1	false
1505	pp	Q9CQ92 (pp) Q8BZ98	false
1506	pp	Q9CQ92 (pp) Q6PCP5	false
1507	pp	Q9CQ92 (pp) Q8K1M6	false
1508	pp	Q8BPN8 (pp) Q5SQX6	false
1509	pp	Q8BPN8 (pp) P12382	false
1510	pp	Q8BPN8 (pp) Q9Z1G3	false
1511	pp	Q8BPN8 (pp) P63318	false
1512	pp	Q8BPN8 (pp) Q9WUA3	false
1513	pp	Q8BPN8 (pp) P28660	false
1514	pp	Q8BPN8 (pp) P70404	false
1515	pp	P18572 (pp) O35465	false
1516	pp	P09671 (pp) Q99KI0	false
1517	pp	P09671 (pp) Q9WUM5	false
1518	pp	P09671 (pp) Q03265	false
1519	pp	P09671 (pp) Q9QUH0	false
1520	pp	P09671 (pp) Q9CQA3	false
1521	pp	P09671 (pp) Q9CR68	false
1522	pp	P09671 (pp) P20108	false
1523	pp	P09671 (pp) Q9DCJ5	false
1524	pp	P09671 (pp) P97807	false
1525	pp	P09671 (pp) Q8K3J1	false
1526	pp	P09671 (pp) P17751	false
1527	pp	P09671 (pp) Q9D6J5	false
1528	pp	P09671 (pp) Q80Y14	false
1529	pp	P09671 (pp) Q64521	false
1530	pp	P09671 (pp) Q9D0M3	false
1531	pp	P09671 (pp) Q99LX0	false
1532	pp	P09671 (pp) P52503	false
1533	pp	P09671 (pp) Q91YT0	false
1534	pp	P09671 (pp) Q9DCD0	false
1535	pp	P09671 (pp) Q9DC69	false
1536	pp	P09671 (pp) P08249	false
1537	pp	P09671 (pp) Q9DC70	false
1538	pp	P09671 (pp) P63038	false
1539	pp	P09671 (pp) Q9CXZ1	false
1540	pp	P09671 (pp) O70325	false
1541	pp	P09671 (pp) Q9CQQ7	false
1542	pp	P09671 (pp) P99029	false
1543	pp	P09671 (pp) P06745	false
1544	pp	P09671 (pp) Q9D2G2	false
1545	pp	P09671 (pp) Q9CPP6	false
1546	pp	P09671 (pp) Q9D6J6	false
1547	pp	P09671 (pp) Q91VD9	false
1548	pp	P09671 (pp) P09411	false
1549	pp	P09671 (pp) Q9CQH3	false
1550	pp	P16054 (pp) P05480	false
1551	pp	P16054 (pp) P67778	false
1552	pp	P16054 (pp) P17182	false
1553	pp	P16054 (pp) Q9CQA3	false
1554	pp	P16054 (pp) Q9CQ62	false
1555	pp	P16054 (pp) Q9CQR4	false
1556	pp	P16054 (pp) P35438	false
1557	pp	P16054 (pp) Q99JY0	false
1558	pp	P16054 (pp) Q9CR62	false
1559	pp	P16054 (pp) P23242	false
1560	pp	P16054 (pp) P63038	false
1561	pp	P16054 (pp) P48962	false
1562	pp	P16054 (pp) O35643	false
1563	pp	P16054 (pp) Q8BMS1	false
1564	pp	P16054 (pp) P16858	false
1565	pp	P16054 (pp) P47757	false
1566	pp	P62962 (pp) P60710	false
1567	pp	P62962 (pp) P99024	false
1568	pp	P62962 (pp) P39053	false
1569	pp	P62962 (pp) P59999	false
1570	pp	P62962 (pp) Q9JJV2	false
1571	pp	P22315 (pp) Q9Z1J3	false
1572	pp	P22315 (pp) P63038	false
1573	pp	P22315 (pp) Q61102	false
1574	pp	P35486 (pp) Q8BMF4	false
1575	pp	P35486 (pp) Q05920	false
1576	pp	P35486 (pp) P06151	false
1577	pp	P35486 (pp) P09411	false
1578	pp	P35486 (pp) Q9D2G2	false
1579	pp	P35486 (pp) Q922H2	false
1580	pp	P35486 (pp) Q9DC69	false
1581	pp	P35486 (pp) P52480	false
1582	pp	P35486 (pp) P06745	false
1583	pp	P35486 (pp) Q9WUM5	false
1584	pp	P47754 (pp) P62259	false
1585	pp	P47754 (pp) P47757	false
1586	pp	P47754 (pp) P63101	false
1587	pp	P47754 (pp) P16054	false
1588	pp	P14094 (pp) P04925	false
1589	pp	Q99JY9 (pp) Q9JM76	false
1590	pp	Q99JY9 (pp) P59999	false
1591	pp	Q99JY9 (pp) Q60598	false
1592	pp	Q99JY9 (pp) Q8VDN2	false
1593	pp	Q99JY9 (pp) P14094	false
1594	pp	Q99MN9 (pp) Q05920	false
1595	pp	Q99MN9 (pp) Q99JY0	false
1596	pp	Q99MN9 (pp) Q8BWT1	false
1597	pp	Q99MN9 (pp) Q9WUM5	false
1598	pp	Q99MN9 (pp) Q91ZA3	false
1599	pp	Q99MN9 (pp) Q9EQ20	false
1600	pp	Q99PT1 (pp) P84096	false
1601	pp	Q99PT1 (pp) P26040	false
1602	pp	Q99PT1 (pp) P62746	false
1603	pp	Q99PT1 (pp) P63001	false
1604	pp	Q99PT1 (pp) O35465	false
1605	pp	Q99PT1 (pp) P56480	false
1606	pp	O88935 (pp) P39053	false
1607	pp	P97450 (pp) Q9Z1P6	false
1608	pp	P97450 (pp) P48771	false
1609	pp	P97450 (pp) P19783	false
1610	pp	P97450 (pp) Q8K3J1	false
1611	pp	P97450 (pp) Q9CQQ7	false
1612	pp	P97450 (pp) Q99LX0	false
1613	pp	P97450 (pp) Q9DC69	false
1614	pp	P97450 (pp) Q9DB20	false
1615	pp	P97450 (pp) P56391	false
1616	pp	P97450 (pp) Q9DCJ5	false
1617	pp	P97450 (pp) Q9D023	false
1618	pp	P97450 (pp) Q91VD9	false
1619	pp	P97450 (pp) P56480	false
1620	pp	P97450 (pp) Q9CPP6	false
1621	pp	P97450 (pp) Q9CQ54	false
1622	pp	P97450 (pp) O09111	false
1623	pp	P97450 (pp) Q9CQ69	false
1624	pp	P97450 (pp) Q9CQH3	false
1625	pp	P97450 (pp) P19536	false
1626	pp	P97450 (pp) Q8VEM8	false
1627	pp	P97450 (pp) Q9CPQ8	false
1628	pp	P97450 (pp) Q9CR68	false
1629	pp	P97450 (pp) Q91YT0	false
1630	pp	P97450 (pp) Q3UIU2	false
1631	pp	P97450 (pp) Q9D6J5	false
1632	pp	P97450 (pp) Q99LC5	false
1633	pp	P97450 (pp) O88441	false
1634	pp	P97450 (pp) Q9WUM5	false
1635	pp	P97450 (pp) Q9D3D9	false
1636	pp	P97450 (pp) Q60931	false
1637	pp	P97450 (pp) Q9D6J6	false
1638	pp	P97450 (pp) O35658	false
1639	pp	P97450 (pp) Q91VR2	false
1640	pp	P97450 (pp) Q9DCX2	false
1641	pp	P97450 (pp) Q06185	false
1642	pp	P97450 (pp) Q9DB77	false
1643	pp	P97450 (pp) Q9ERS2	false
1644	pp	P97450 (pp) P03930	false
1645	pp	P97450 (pp) Q9CQZ6	false
1646	pp	P97450 (pp) Q03265	false
1647	pp	P97450 (pp) Q99LY9	false
1648	pp	P97450 (pp) Q9DCS9	false
1649	pp	P97450 (pp) Q91VM9	false
1650	pp	Q64010 (pp) P68510	false
1651	pp	Q64010 (pp) P68254	false
1652	pp	Q64010 (pp) P61982	false
1653	pp	Q64010 (pp) P62259	false
1654	pp	Q64010 (pp) P63101	false
1655	pp	Q64010 (pp) P05480	false
1656	pp	P20108 (pp) P63038	false
1657	pp	P20108 (pp) Q9WUM5	false
1658	pp	P20108 (pp) Q99LC5	false
1659	pp	P20108 (pp) Q9DB77	false
1660	pp	Q9QUH0 (pp) O70325	false
1661	pp	Q9QUH0 (pp) P99029	false
1662	pp	Q9QUH0 (pp) P20108	false
1663	pp	Q64521 (pp) Q3ULJ0	false
1664	pp	Q64521 (pp) Q64516	false
1665	pp	P13707 (pp) P17751	false
1666	pp	P13707 (pp) Q64516	false
1667	pp	P13707 (pp) Q64521	false
1668	pp	Q9R0K7 (pp) P04925	false
1669	pp	Q9R0K7 (pp) P12023	false
1670	pp	Q9D898 (pp) P59999	false
1671	pp	P63017 (pp) Q61699	false
1672	pp	P63017 (pp) Q9QYJ0	false
1673	pp	P63017 (pp) P10637	false
1674	pp	P63017 (pp) P07901	false
1675	pp	P63017 (pp) P62259	false
1676	pp	P63017 (pp) P11499	false
1677	pp	P63017 (pp) P63038	false
1678	pp	P63017 (pp) Q60864	false
1679	pp	P63017 (pp) P63037	false
1680	pp	Q61548 (pp) P17427	false
1681	pp	P12367 (pp) D3YVF0	false
1682	pp	P12367 (pp) Q8BR92	false
1683	pp	Q9D023 (pp) Q9CQH3	false
1684	pp	Q9D023 (pp) Q9D6J6	false
1685	pp	Q9D023 (pp) Q99LC5	false
1686	pp	P56379 (pp) Q9DB20	false
1687	pp	P56379 (pp) Q9CPQ8	false
1688	pp	P56379 (pp) Q9CQZ6	false
1689	pp	P56379 (pp) P97450	false
1690	pp	P56379 (pp) Q9D855	false
1691	pp	P56379 (pp) P52503	false
1692	pp	P56379 (pp) Q9CQZ5	false
1693	pp	P56379 (pp) P48771	false
1694	pp	P56379 (pp) Q9CQ69	false
1695	pp	P56379 (pp) Q9Z1P6	false
1696	pp	P56379 (pp) Q06185	false
1697	pp	P56379 (pp) Q9CQH3	false
1698	pp	P18052 (pp) P05480	false
1699	pp	P18052 (pp) P43406	false
1700	pp	P70232 (pp) P18052	false
1701	pp	Q9CZS1 (pp) P61922	false
1702	pp	Q9CZS1 (pp) Q8CHT0	false
1703	pp	Q9CZS1 (pp) Q9EQ20	false
1704	pp	O35129 (pp) O35658	false
1705	pp	O35129 (pp) P63038	false
1706	pp	O35129 (pp) Q9D0M3	false
1707	pp	O35129 (pp) Q99LX0	false
1708	pp	O35129 (pp) P67778	false
1709	pp	O35129 (pp) Q9DCT2	false
1710	pp	O35129 (pp) Q9CZ13	false
1711	pp	O35129 (pp) Q8BGH2	false
1712	pp	O35129 (pp) P62073	false
1713	pp	O88696 (pp) Q9CQA3	false
1714	pp	O88696 (pp) Q8K3J1	false
1715	pp	O88696 (pp) P97807	false
1716	pp	O88696 (pp) P56480	false
1717	pp	O88696 (pp) Q9CZ13	false
1718	pp	O88696 (pp) Q99LX0	false
1719	pp	O88696 (pp) Q9Z1P6	false
1720	pp	O88696 (pp) P67778	false
1721	pp	O88696 (pp) Q9DCT2	false
1722	pp	O88696 (pp) Q8CGK3	false
1723	pp	O88696 (pp) P17751	false
1724	pp	O88696 (pp) Q91Z53	false
1725	pp	O88696 (pp) P52503	false
1726	pp	O88696 (pp) O08756	false
1727	pp	O88696 (pp) Q91YT0	false
1728	pp	O88696 (pp) P42125	false
1729	pp	O88696 (pp) Q8BGH2	false
1730	pp	O88696 (pp) Q9DC70	false
1731	pp	O88696 (pp) Q9D3D9	false
1732	pp	O88696 (pp) Q9D6J6	false
1733	pp	O88696 (pp) P63038	false
1734	pp	O88696 (pp) Q9DB20	false
1735	pp	O88696 (pp) Q9D0M3	false
1736	pp	O88696 (pp) O35129	false
1737	pp	Q9CQQ7 (pp) Q9D3D9	false
1738	pp	Q9CQQ7 (pp) Q9ERS2	false
1739	pp	Q9CQQ7 (pp) Q9D6J6	false
1740	pp	Q9CQQ7 (pp) Q3UIU2	false
1741	pp	Q9CQQ7 (pp) Q91VR2	false
1742	pp	Q9CQQ7 (pp) Q99LY9	false
1743	pp	Q9CQQ7 (pp) Q9CQH3	false
1744	pp	Q9JJV2 (pp) O88935	false
1745	pp	Q9JJV2 (pp) P39053	false
1746	pp	Q9JJV2 (pp) Q9QXS6	false
1747	pp	Q9JJV2 (pp) P60710	false
1748	pp	Q9DC69 (pp) Q9ERS2	false
1749	pp	Q9DC69 (pp) Q99LX0	false
1750	pp	Q9DC69 (pp) Q9CQH3	false
1751	pp	Q9DC69 (pp) Q9DCX2	false
1752	pp	Q9DC69 (pp) Q9D6J6	false
1753	pp	Q9DC69 (pp) P99029	false
1754	pp	Q9DC69 (pp) Q9D3D9	false
1755	pp	Q9DC69 (pp) Q9CQQ7	false
1756	pp	Q9DC69 (pp) O09111	false
1757	pp	Q9DC69 (pp) Q91VR2	false
1758	pp	Q91VM9 (pp) Q99LC5	false
1759	pp	Q91VM9 (pp) P63082	false
1760	pp	Q91VM9 (pp) Q9CQQ7	false
1761	pp	Q9DB77 (pp) P00405	false
1762	pp	Q9DB77 (pp) Q8VEM8	false
1763	pp	Q9DB77 (pp) Q9D6J6	false
1764	pp	Q9DB77 (pp) Q9ERS2	false
1765	pp	Q9DB77 (pp) Q99LY9	false
1766	pp	Q9DB77 (pp) Q9DCX2	false
1767	pp	Q9DB77 (pp) Q9CQQ7	false
1768	pp	Q9DB77 (pp) Q9DCS9	false
1769	pp	Q9DB77 (pp) Q9DCJ5	false
1770	pp	Q9DB77 (pp) Q9CR68	false
1771	pp	Q9DB77 (pp) O09111	false
1772	pp	Q9DB77 (pp) Q99P72	false
1773	pp	Q9DB77 (pp) Q3UIU2	false
1774	pp	Q9DB77 (pp) Q99JY0	false
1775	pp	Q9DB77 (pp) Q91VR2	false
1776	pp	Q9DB77 (pp) Q99LC5	false
1777	pp	Q9DB77 (pp) P19783	false
1778	pp	Q9DB77 (pp) P68510	false
1779	pp	Q9DB77 (pp) Q9CQ69	false
1780	pp	Q9DB77 (pp) Q9WUM5	false
1781	pp	Q9DB77 (pp) Q9DC69	false
1782	pp	Q9DB77 (pp) Q91YT0	false
1783	pp	Q9DB77 (pp) Q9CQH3	false
1784	pp	Q8K3J1 (pp) Q91VR2	false
1785	pp	Q8K3J1 (pp) Q9D6J6	false
1786	pp	Q8K3J1 (pp) Q9DC69	false
1787	pp	Q8K3J1 (pp) P56391	false
1788	pp	Q8K3J1 (pp) Q9DCX2	false
1789	pp	Q8K3J1 (pp) Q9CQH3	false
1790	pp	Q8K3J1 (pp) Q9CQQ7	false
1791	pp	Q8K3J1 (pp) Q9ERS2	false
1792	pp	Q8K3J1 (pp) Q9D3D9	false
1793	pp	Q8K3J1 (pp) O09111	false
1794	pp	Q8K3J1 (pp) Q99LX0	false
1795	pp	Q8K3J1 (pp) Q3UIU2	false
1796	pp	Q9D855 (pp) Q9CQH3	false
1797	pp	Q9D855 (pp) Q03265	false
1798	pp	Q9D855 (pp) P43024	false
1799	pp	Q9D855 (pp) Q91YT0	false
1800	pp	Q9D855 (pp) Q8K2B3	false
1801	pp	Q9D855 (pp) Q9ERS2	false
1802	pp	Q9D855 (pp) Q9CQQ7	false
1803	pp	Q9D855 (pp) Q9CZ13	false
1804	pp	Q9D855 (pp) P97450	false
1805	pp	Q9D855 (pp) Q9D0M3	false
1806	pp	Q9D855 (pp) Q91VD9	false
1807	pp	Q9D855 (pp) Q9DCJ5	false
1808	pp	Q9D855 (pp) Q99LY9	false
1809	pp	Q9D855 (pp) Q9CR68	false
1810	pp	Q9D855 (pp) Q9DB20	false
1811	pp	Q9D855 (pp) Q9DC69	false
1812	pp	Q9D855 (pp) Q9DB77	false
1813	pp	Q9D855 (pp) Q9CPP6	false
1814	pp	Q9D855 (pp) P56391	false
1815	pp	Q9D855 (pp) Q06185	false
1816	pp	Q9D855 (pp) Q9CQZ6	false
1817	pp	Q9D855 (pp) Q9D023	false
1818	pp	Q9D855 (pp) Q9DCS9	false
1819	pp	Q9D855 (pp) P97807	false
1820	pp	Q9D855 (pp) P52503	false
1821	pp	Q9D855 (pp) Q3UIU2	false
1822	pp	Q9D855 (pp) Q9CQ69	false
1823	pp	Q9D855 (pp) Q9D6J6	false
1824	pp	Q9D855 (pp) Q9CQJ8	false
1825	pp	Q9D855 (pp) Q9D3D9	false
1826	pp	Q9D855 (pp) Q9CQZ5	false
1827	pp	Q9D855 (pp) Q91VR2	false
1828	pp	Q9D855 (pp) Q9DCX2	false
1829	pp	Q9D855 (pp) Q8K3J1	false
1830	pp	Q9JHU4 (pp) Q8BPN8	false
1831	pp	Q9JHU4 (pp) P63005	false
1832	pp	Q9JHU4 (pp) P07901	false
1833	pp	Q9JHU4 (pp) O08788	false
1834	pp	Q9JHU4 (pp) P68369	false
1835	pp	Q9JHU4 (pp) P63101	false
1836	pp	Q9JHU4 (pp) P68368	false
1837	pp	Q9JHU4 (pp) Q9DC28	false
1838	pp	Q9JHU4 (pp) Q99KJ8	false
1839	pp	Q9JHU4 (pp) Q60996	false
1840	pp	P46660 (pp) P19246	false
1841	pp	P46660 (pp) P35438	false
1842	pp	P63044 (pp) P35802	false
1843	pp	P63044 (pp) P51863	false
1844	pp	P63044 (pp) P18872	false
1845	pp	P63044 (pp) Q6PIE5	false
1846	pp	P63044 (pp) O35526	false
1847	pp	P63044 (pp) P62874	false
1848	pp	P63044 (pp) Q99LX0	false
1849	pp	P63044 (pp) P39053	false
1850	pp	P63044 (pp) Q6PIC6	false
1851	pp	P63044 (pp) P28663	false
1852	pp	P63044 (pp) O55042	false
1853	pp	P63044 (pp) P60766	false
1854	pp	Q62351 (pp) Q68FD5	false
1855	pp	Q62351 (pp) Q91VZ6	false
1856	pp	P63001 (pp) P35438	false
1857	pp	P63001 (pp) P60766	false
1858	pp	P63001 (pp) Q5FWK3	false
1859	pp	Q8BG51 (pp) P84096	false
1860	pp	Q8BG51 (pp) Q5FWK3	false
1861	pp	Q8BG51 (pp) P63001	false
1862	pp	Q9CXZ1 (pp) Q9D6J6	false
1863	pp	Q9CXZ1 (pp) Q91VD9	false
1864	pp	Q9CXZ1 (pp) Q9DC69	false
1865	pp	Q9CXZ1 (pp) Q9DCS9	false
1866	pp	Q9CXZ1 (pp) Q9CQ69	false
1867	pp	Q9CXZ1 (pp) Q8K3J1	false
1868	pp	Q9CXZ1 (pp) Q9ERS2	false
1869	pp	Q9CXZ1 (pp) Q3UIU2	false
1870	pp	Q9CXZ1 (pp) O09111	false
1871	pp	Q9CXZ1 (pp) Q9D0M3	false
1872	pp	Q9CXZ1 (pp) Q9Z1P6	false
1873	pp	Q9CXZ1 (pp) Q9CQJ8	false
1874	pp	Q9CXZ1 (pp) Q62425	false
1875	pp	Q9CXZ1 (pp) Q91YT0	false
1876	pp	Q9CXZ1 (pp) Q9CR68	false
1877	pp	Q9CXZ1 (pp) Q99LY9	false
1878	pp	Q9CXZ1 (pp) Q9DCJ5	false
1879	pp	Q9CXZ1 (pp) Q9CQQ7	false
1880	pp	Q9CXZ1 (pp) Q9CQH3	false
1881	pp	Q9CXZ1 (pp) Q9D6J5	false
1882	pp	Q9CXZ1 (pp) P97450	false
1883	pp	Q9CXZ1 (pp) Q9DB77	false
1884	pp	Q9CXZ1 (pp) Q9CQZ6	false
1885	pp	Q9CXZ1 (pp) Q9CQ54	false
1886	pp	Q9CXZ1 (pp) Q99LC3	false
1887	pp	Q9CXZ1 (pp) Q9CQC7	false
1888	pp	Q9CXZ1 (pp) Q9CQZ5	false
1889	pp	Q9CXZ1 (pp) Q9CPP6	false
1890	pp	Q60676 (pp) P35438	false
1891	pp	Q60676 (pp) P63330	false
1892	pp	Q8JZN5 (pp) Q61425	false
1893	pp	Q8JZN5 (pp) Q8BMS1	false
1894	pp	Q8JZN5 (pp) Q99LC5	false
1895	pp	Q8JZQ2 (pp) P63038	false
1896	pp	Q8JZQ2 (pp) P00493	false
1897	pp	Q8JZQ2 (pp) Q68FF6	false
1898	pp	P51174 (pp) Q99LC5	false
1899	pp	P51174 (pp) Q8BMS1	false
1900	pp	P51174 (pp) Q91WC3	false
1901	pp	P51174 (pp) Q8BWT1	false
1902	pp	P51174 (pp) Q921G7	false
1903	pp	P51174 (pp) P41216	false
1904	pp	P51174 (pp) Q61425	false
1905	pp	P51174 (pp) Q8BGD5	false
1906	pp	P51174 (pp) Q99JY0	false
1907	pp	Q8VDD5 (pp) P35438	false
1908	pp	Q8VDD5 (pp) P63101	false
1909	pp	Q8VDD5 (pp) Q01097	false
1910	pp	P18872 (pp) P12023	false
1911	pp	P18872 (pp) P62874	false
1912	pp	P18872 (pp) P06151	false
1913	pp	Q9CQ75 (pp) Q9CPP6	false
1914	pp	Q9CQ75 (pp) Q91VD9	false
1915	pp	Q9CQ75 (pp) Q9CQJ8	false
1916	pp	Q9CQ75 (pp) Q8K3J1	false
1917	pp	Q9CQ75 (pp) Q9CQZ5	false
1918	pp	Q9CQ75 (pp) Q9DC69	false
1919	pp	Q9CQ75 (pp) Q9CPQ1	false
1920	pp	Q9CQ75 (pp) Q9D3D9	false
1921	pp	Q9CQ75 (pp) Q9D6J6	false
1922	pp	Q9CQ75 (pp) Q9CXZ1	false
1923	pp	Q9CQ75 (pp) Q7TMF3	false
1924	pp	Q9CQ75 (pp) Q9D6J5	false
1925	pp	Q9CQ75 (pp) Q99LC3	false
1926	pp	Q9CQ75 (pp) Q3UIU2	false
1927	pp	Q9CQ75 (pp) Q9CR68	false
1928	pp	Q9CQ75 (pp) Q9ERS2	false
1929	pp	Q9CQ75 (pp) P43024	false
1930	pp	Q9CQ75 (pp) Q62425	false
1931	pp	Q9CQ75 (pp) Q9CQH3	false
1932	pp	Q9CQ75 (pp) Q9D0M3	false
1933	pp	Q9CQ75 (pp) Q9Z1P6	false
1934	pp	Q9CQ75 (pp) P56391	false
1935	pp	Q9CQ75 (pp) Q9CQ69	false
1936	pp	Q9CQ75 (pp) Q9DCX2	false
1937	pp	Q9CQ75 (pp) Q9CQZ6	false
1938	pp	Q9CQ75 (pp) Q99LY9	false
1939	pp	Q9CQ75 (pp) Q9DCJ5	false
1940	pp	Q9CQ75 (pp) Q9CQ54	false
1941	pp	Q9CQ75 (pp) Q9CQC7	false
1942	pp	Q9CQ75 (pp) O09111	false
1943	pp	Q9CQ75 (pp) Q9DCS9	false
1944	pp	Q9CQ75 (pp) P97450	false
1945	pp	Q9CQ75 (pp) Q9D855	false
1946	pp	Q9CQ75 (pp) Q9DB20	false
1947	pp	Q9CQ75 (pp) Q91YT0	false
1948	pp	Q9CQ75 (pp) P52503	false
1949	pp	Q9CQ75 (pp) Q9DC70	false
1950	pp	P03930 (pp) Q9CQQ7	false
1951	pp	P03930 (pp) Q91VR2	false
1952	pp	P03930 (pp) Q9D3D9	false
1953	pp	P49615 (pp) P19246	false
1954	pp	P39688 (pp) Q60631	false
1955	pp	P39688 (pp) P30999	false
1956	pp	P39688 (pp) P18052	false
1957	pp	P39688 (pp) P49615	false
1958	pp	P04925 (pp) P62259	false
1959	pp	P04925 (pp) O35136	false
1960	pp	P04925 (pp) P11627	false
1961	pp	P04925 (pp) O08599	false
1962	pp	P04925 (pp) P63101	false
1963	pp	P04925 (pp) O88935	false
1964	pp	P04925 (pp) Q99PJ0	false
1965	pp	P04925 (pp) Q99N28	false
1966	pp	P04925 (pp) Q9Z218	false
1967	pp	P04925 (pp) Q8VDN2	false
1968	pp	Q99JY0 (pp) Q8BMS1	false
1969	pp	Q99JY0 (pp) Q9DBL1	false
1970	pp	O08756 (pp) Q8BMS1	false
1971	pp	O08756 (pp) Q9CQH3	false
1972	pp	O08756 (pp) O09111	false
1973	pp	O08756 (pp) Q99JY0	false
1974	pp	P28660 (pp) Q9JJV2	false
1975	pp	P60879 (pp) P63017	false
1976	pp	P60879 (pp) O55042	false
1977	pp	P60879 (pp) Q8K400	false
1978	pp	P60879 (pp) P63040	false
1979	pp	P60879 (pp) P61264	false
1980	pp	P60879 (pp) O08599	false
1981	pp	P60879 (pp) Q7TSJ2	false
1982	pp	P60879 (pp) P68368	false
1983	pp	P60879 (pp) P16858	false
1984	pp	P60879 (pp) Q9QWI6	false
1985	pp	P60879 (pp) P46096	false
1986	pp	P60879 (pp) P17426	false
1987	pp	P60879 (pp) Q62442	false
1988	pp	P60879 (pp) P47708	false
1989	pp	P60879 (pp) P63044	false
1990	pp	P60879 (pp) P51863	false
1991	pp	P60879 (pp) P06837	false
1992	pp	P60879 (pp) P28660	false
1993	pp	Q9DCJ5 (pp) O09111	false
1994	pp	Q9DCJ5 (pp) P56391	false
1995	pp	Q9DCJ5 (pp) Q99LY9	false
1996	pp	Q9DCJ5 (pp) Q91VR2	false
1997	pp	Q9DCJ5 (pp) Q9D6J6	false
1998	pp	Q9DCJ5 (pp) P99029	false
1999	pp	Q9DCJ5 (pp) O08756	false
2000	pp	Q9DCJ5 (pp) Q99LX0	false
2001	pp	Q9DCJ5 (pp) P67778	false
2002	pp	Q9DCJ5 (pp) Q9DCX2	false
2003	pp	Q9DCJ5 (pp) Q9CQH3	false
2004	pp	Q9DCJ5 (pp) Q9CPQ8	false
2005	pp	Q9DCJ5 (pp) Q9ERS2	false
2006	pp	Q9DCJ5 (pp) Q9CQQ7	false
2007	pp	Q9DCJ5 (pp) Q9DC69	false
2008	pp	Q9DCJ5 (pp) Q9D3D9	false
2009	pp	Q9DCJ5 (pp) Q3UIU2	false
2010	pp	Q9DCJ5 (pp) Q8K3J1	false
2011	pp	Q9DCJ5 (pp) P50516	false
2012	pp	Q91YT0 (pp) Q9WUM5	false
2013	pp	Q91YT0 (pp) Q8CAQ8	false
2014	pp	Q91YT0 (pp) Q9DCJ5	false
2015	pp	Q91YT0 (pp) Q99LX0	false
2016	pp	Q91YT0 (pp) Q9CQ69	false
2017	pp	Q91YT0 (pp) O09111	false
2018	pp	Q91YT0 (pp) Q8K3J1	false
2019	pp	Q91YT0 (pp) Q91VR2	false
2020	pp	Q91YT0 (pp) Q3UIU2	false
2021	pp	Q91YT0 (pp) Q9D2G2	false
2022	pp	Q91YT0 (pp) Q9DCS9	false
2023	pp	Q91YT0 (pp) Q9D3D9	false
2024	pp	Q91YT0 (pp) Q9ERS2	false
2025	pp	Q91YT0 (pp) Q60597	false
2026	pp	Q91YT0 (pp) Q9CR68	false
2027	pp	Q91YT0 (pp) Q9CQQ7	false
2028	pp	Q91YT0 (pp) Q9DCX2	false
2029	pp	Q91YT0 (pp) Q9DC69	false
2030	pp	Q91YT0 (pp) P70404	false
2031	pp	Q91YT0 (pp) Q9D6J6	false
2032	pp	Q91YT0 (pp) Q9CQH3	false
2033	pp	Q91YT0 (pp) Q06185	false
2034	pp	Q9JM76 (pp) P59999	false
2035	pp	Q9JM76 (pp) P68510	false
2036	pp	Q9JM76 (pp) Q9D898	false
2037	pp	Q9R0Q6 (pp) Q9CPW4	false
2038	pp	Q9R0Q6 (pp) P59999	false
2039	pp	Q9R0Q6 (pp) Q9JM76	false
2040	pp	Q68FD5 (pp) P17426	false
2041	pp	Q68FD5 (pp) Q62420	false
2042	pp	Q68FD5 (pp) P62962	false
2043	pp	Q68FD5 (pp) P35438	false
2044	pp	Q68FD5 (pp) Q6IRU5	false
2045	pp	Q68FD5 (pp) P63101	false
2046	pp	Q68FD5 (pp) Q80VP1	false
2047	pp	Q68FD5 (pp) O35643	false
2048	pp	Q68FD5 (pp) Q80TZ3	false
2049	pp	Q68FD5 (pp) Q9Z0R4	false
2050	pp	Q68FD5 (pp) O70589	false
2051	pp	Q68FD5 (pp) O08585	false
2052	pp	Q68FD5 (pp) P62743	false
2053	pp	Q68FD5 (pp) Q8CHC4	false
2054	pp	Q68FD5 (pp) Q01097	false
2055	pp	Q68FD5 (pp) Q8CHU3	false
2056	pp	Q68FD5 (pp) Q61548	false
2057	pp	Q68FD5 (pp) P62259	false
2058	pp	Q60864 (pp) P63038	false
2059	pp	Q60864 (pp) P04925	false
2060	pp	Q60864 (pp) Q9CR16	false
2061	pp	Q60864 (pp) P48722	false
2062	pp	Q60864 (pp) Q61699	false
2063	pp	Q60864 (pp) P63037	false
2064	pp	Q60864 (pp) P17156	false
2065	pp	Q60864 (pp) Q9QYJ0	false
2066	pp	P19536 (pp) P00405	false
2067	pp	P19536 (pp) Q91VR2	false
2068	pp	P19536 (pp) Q9CQH3	false
2069	pp	P19536 (pp) Q9CQ69	false
2070	pp	P19536 (pp) P56391	false
2071	pp	P19536 (pp) Q9D3D9	false
2072	pp	P19536 (pp) Q9CR68	false
2073	pp	Q9JLB0 (pp) O70318	false
2074	pp	Q9JLB0 (pp) Q8R5M8	false
2075	pp	Q9JLB0 (pp) Q99N28	false
2076	pp	Q8BVE3 (pp) Q9DC69	false
2077	pp	Q8BVE3 (pp) P50516	false
2078	pp	Q8BVE3 (pp) P63082	false
2079	pp	Q8BVE3 (pp) Q9Z1G4	false
2080	pp	Q8BVE3 (pp) P45878	false
2081	pp	P50518 (pp) P50516	false
2082	pp	P50518 (pp) Q9Z1G3	false
2083	pp	P50518 (pp) Q9WTT4	false
2084	pp	P50518 (pp) P57746	false
2085	pp	P50518 (pp) P63082	false
2086	pp	P50518 (pp) Q9Z1G4	false
2087	pp	P50518 (pp) Q8BVE3	false
2088	pp	Q61735 (pp) P97797	false
2089	pp	Q9DCX2 (pp) Q99LY9	false
2090	pp	Q9DCX2 (pp) Q9D3D9	false
2091	pp	Q9DCX2 (pp) Q9CQH3	false
2092	pp	Q9DCX2 (pp) Q9D6J6	false
2093	pp	Q9DCX2 (pp) Q9CQQ7	false
2094	pp	Q9DCX2 (pp) Q91VR2	false
2095	pp	Q9DCX2 (pp) Q99LX0	false
2096	pp	Q9DCX2 (pp) Q9ERS2	false
2097	pp	Q7TMF3 (pp) Q99LC3	false
2098	pp	Q7TMF3 (pp) Q91VD9	false
2099	pp	Q7TMF3 (pp) Q91YT0	false
2100	pp	Q7TMF3 (pp) Q9CQ69	false
2101	pp	Q7TMF3 (pp) Q9D6J6	false
2102	pp	Q7TMF3 (pp) Q9D3D9	false
2103	pp	Q7TMF3 (pp) Q9CQH3	false
2104	pp	Q7TMF3 (pp) Q9CQC7	false
2105	pp	Q7TMF3 (pp) Q8K3J1	false
2106	pp	Q7TMF3 (pp) Q99LY9	false
2107	pp	Q7TMF3 (pp) Q9D6J5	false
2108	pp	Q7TMF3 (pp) Q9CQJ8	false
2109	pp	Q7TMF3 (pp) Q9ERS2	false
2110	pp	Q7TMF3 (pp) Q3UIU2	false
2111	pp	Q7TMF3 (pp) Q9CQZ6	false
2112	pp	Q7TMF3 (pp) Q9DCJ5	false
2113	pp	Q7TMF3 (pp) Q9Z1P6	false
2114	pp	Q7TMF3 (pp) Q9CQQ7	false
2115	pp	Q7TMF3 (pp) Q9CQZ5	false
2116	pp	Q7TMF3 (pp) Q9DCS9	false
2117	pp	Q7TMF3 (pp) Q9DC70	false
2118	pp	Q7TMF3 (pp) Q9D855	false
2119	pp	Q7TMF3 (pp) P52503	false
2120	pp	Q7TMF3 (pp) P97450	false
2121	pp	Q7TMF3 (pp) Q9D0M3	false
2122	pp	Q7TMF3 (pp) Q62425	false
2123	pp	Q7TMF3 (pp) Q9DC69	false
2124	pp	Q7TMF3 (pp) Q9CQ54	false
2125	pp	Q7TMF3 (pp) Q9CR68	false
2126	pp	Q7TMF3 (pp) O09111	false
2127	pp	Q7TMF3 (pp) Q9CXZ1	false
2128	pp	Q7TMF3 (pp) Q9DCX2	false
2129	pp	O35658 (pp) Q9CQQ7	false
2130	pp	O35658 (pp) P40630	false
2131	pp	Q99KR7 (pp) P56480	false
2132	pp	Q99KR7 (pp) O35658	false
2133	pp	P62874 (pp) P04925	false
2134	pp	P63213 (pp) P18872	false
2135	pp	P63213 (pp) P62874	false
2136	pp	P40142 (pp) P05063	false
2137	pp	P40142 (pp) Q9D0F9	false
2138	pp	P40142 (pp) P35486	false
2139	pp	P40142 (pp) P17182	false
2140	pp	P40142 (pp) P06151	false
2141	pp	P40142 (pp) P05064	false
2142	pp	P40142 (pp) P17751	false
2143	pp	P40142 (pp) P52480	false
2144	pp	P40142 (pp) Q60597	false
2145	pp	P40142 (pp) P16858	false
2146	pp	P40142 (pp) Q93092	false
2147	pp	P40142 (pp) P06745	false
2148	pp	P40142 (pp) Q9DCD0	false
2149	pp	P40142 (pp) P09411	false
2150	pp	Q9CQR4 (pp) Q61425	false
2151	pp	Q9CQR4 (pp) Q99LC5	false
2152	pp	Q9CQR4 (pp) Q9DCJ5	false
2153	pp	Q9CQR4 (pp) Q9CQZ5	false
2154	pp	Q9CQR4 (pp) Q9CQZ6	false
2155	pp	Q9CQR4 (pp) Q9DCD0	false
2156	pp	Q9CQR4 (pp) Q9D6J6	false
2157	pp	Q9CQR4 (pp) P97450	false
2158	pp	Q9CQR4 (pp) Q9CQH3	false
2159	pp	Q9CQV8 (pp) P10637	false
2160	pp	Q9CQV8 (pp) Q64010	false
2161	pp	Q9CQV8 (pp) P16054	false
2162	pp	Q9CQV8 (pp) P63101	false
2163	pp	Q9CQV8 (pp) P62259	false
2164	pp	P99029 (pp) Q9D6J6	false
2165	pp	P62073 (pp) Q9CQH3	false
2166	pp	P62073 (pp) Q9D6J6	false
2167	pp	P62073 (pp) P67778	false
2168	pp	P62073 (pp) Q9DCS9	false
2169	pp	P62073 (pp) Q9D3D9	false
2170	pp	P62073 (pp) Q9CR68	false
2171	pp	P62073 (pp) O35658	false
2172	pp	P62073 (pp) P56391	false
2173	pp	P62073 (pp) Q9DCJ5	false
2174	pp	P62073 (pp) Q925I1	false
2175	pp	P62073 (pp) Q9ERS2	false
2176	pp	P62073 (pp) O08756	false
2177	pp	P62073 (pp) P99029	false
2178	pp	Q62277 (pp) P43006	false
2179	pp	Q62277 (pp) P01831	false
2180	pp	Q62277 (pp) P63044	false
2181	pp	Q62277 (pp) P46096	false
2182	pp	Q62277 (pp) P62204	false
2183	pp	Q62277 (pp) P60879	false
2184	pp	Q60631 (pp) Q68FD5	false
2185	pp	Q60631 (pp) P39053	false
2186	pp	Q60631 (pp) Q8CHC4	false
2187	pp	Q60631 (pp) P05480	false
2188	pp	Q60631 (pp) O08585	false
2189	pp	Q60631 (pp) P12023	false
2190	pp	Q60631 (pp) P20444	false
2191	pp	Q60631 (pp) P04925	false
2192	pp	Q60631 (pp) P18052	false
2193	pp	Q60631 (pp) Q62420	false
2194	pp	Q60631 (pp) Q62277	false
2195	pp	P52503 (pp) Q9Z1P6	false
2196	pp	P52503 (pp) Q9CQ69	false
2197	pp	P52503 (pp) O09111	false
2198	pp	P52503 (pp) O08756	false
2199	pp	P52503 (pp) Q9D3D9	false
2200	pp	P52503 (pp) Q9DCS9	false
2201	pp	P52503 (pp) Q99LY9	false
2202	pp	P52503 (pp) Q9CPP6	false
2203	pp	P52503 (pp) P17665	false
2204	pp	P52503 (pp) Q9CQ54	false
2205	pp	P52503 (pp) Q06185	false
2206	pp	P52503 (pp) Q9ERS2	false
2207	pp	P52503 (pp) P99029	false
2208	pp	P52503 (pp) Q9D6J5	false
2209	pp	P52503 (pp) Q9CQC7	false
2210	pp	P52503 (pp) Q9D0M3	false
2211	pp	P52503 (pp) Q9CXZ1	false
2212	pp	P52503 (pp) Q9DCJ5	false
2213	pp	P52503 (pp) Q99LX0	false
2214	pp	P52503 (pp) P97450	false
2215	pp	P52503 (pp) Q99LC3	false
2216	pp	P52503 (pp) Q9DB20	false
2217	pp	P52503 (pp) P56391	false
2218	pp	P52503 (pp) Q9CR68	false
2219	pp	P52503 (pp) Q9CQH3	false
2220	pp	P52503 (pp) Q9CQJ8	false
2221	pp	P52503 (pp) Q9CQQ7	false
2222	pp	P52503 (pp) Q8K3J1	false
2223	pp	P52503 (pp) Q9DC69	false
2224	pp	P52503 (pp) P62073	false
2225	pp	P52503 (pp) P43024	false
2226	pp	P52503 (pp) P42125	false
2227	pp	P52503 (pp) Q9CQZ5	false
2228	pp	P52503 (pp) Q91VD9	false
2229	pp	P52503 (pp) Q9CZ13	false
2230	pp	P52503 (pp) Q91YT0	false
2231	pp	P52503 (pp) Q9CQZ6	false
2232	pp	P52503 (pp) P48771	false
2233	pp	P52503 (pp) Q9D6J6	false
2234	pp	Q8R4N0 (pp) Q99LC5	false
2235	pp	Q8R4N0 (pp) Q9WUM5	false
2236	pp	Q8R4N0 (pp) P05480	false
2237	pp	Q8R4N0 (pp) Q99MR8	false
2238	pp	Q8R4N0 (pp) Q91ZA3	false
2239	pp	Q3ULD5 (pp) Q05920	false
2240	pp	Q3ULD5 (pp) Q9D0K2	false
2241	pp	Q3ULD5 (pp) Q99MR8	false
2242	pp	Q3ULD5 (pp) Q91ZA3	false
2243	pp	Q3ULD5 (pp) Q8BH95	false
2244	pp	Q3ULD5 (pp) Q8BMS1	false
2245	pp	Q3ULD5 (pp) Q921G7	false
2246	pp	Q3ULD5 (pp) Q9JHI5	false
2247	pp	Q3ULD5 (pp) Q99MN9	false
2248	pp	Q3ULD5 (pp) Q8R4N0	false
2249	pp	Q8VEM8 (pp) Q9D3D9	false
2250	pp	Q8VEM8 (pp) Q9CQQ7	false
2251	pp	Q8VEM8 (pp) Q9CQH3	false
2252	pp	Q8VEM8 (pp) Q9D6J6	false
2253	pp	P68369 (pp) P60879	false
2254	pp	P68369 (pp) P35438	false
2255	pp	P68369 (pp) P63101	false
2256	pp	P68369 (pp) P27546	false
2257	pp	P68369 (pp) P39053	false
2258	pp	Q8K2B3 (pp) Q99JY0	false
2259	pp	Q8K2B3 (pp) P58281	false
2260	pp	Q8K2B3 (pp) P17751	false
2261	pp	Q8K2B3 (pp) Q91VD9	false
2262	pp	Q8K2B3 (pp) Q9D6R2	false
2263	pp	Q8K2B3 (pp) P63038	false
2264	pp	Q8K2B3 (pp) Q8K3J1	false
2265	pp	Q8K2B3 (pp) P35486	false
2266	pp	Q8K2B3 (pp) Q9DB77	false
2267	pp	Q8K2B3 (pp) Q9D6J6	false
2268	pp	Q8K2B3 (pp) Q9DC69	false
2269	pp	Q8K2B3 (pp) Q9CZ13	false
2270	pp	Q8K2B3 (pp) Q9CR68	false
2271	pp	Q8K2B3 (pp) Q99LC5	false
2272	pp	Q8K2B3 (pp) Q9WUM5	false
2273	pp	Q8K2B3 (pp) P56480	false
2274	pp	Q8K2B3 (pp) Q60597	false
2275	pp	Q8K2B3 (pp) P00493	false
2276	pp	Q8K2B3 (pp) Q9Z2I9	false
2277	pp	Q8K2B3 (pp) Q91YT0	false
2278	pp	Q8K2B3 (pp) P09411	false
2279	pp	Q8K2B3 (pp) Q99KI0	false
2280	pp	Q8K2B3 (pp) Q9CQQ7	false
2281	pp	Q8K2B3 (pp) Q9CPP6	false
2282	pp	Q8K2B3 (pp) P52196	false
2283	pp	Q8K2B3 (pp) Q03265	false
2284	pp	Q8K2B3 (pp) Q9D051	false
2285	pp	Q8K2B3 (pp) Q9Z0X1	false
2286	pp	Q8K2B3 (pp) Q9D2G2	false
2287	pp	Q8K2B3 (pp) Q91VR2	false
2288	pp	Q8K2B3 (pp) Q9D0M3	false
2289	pp	Q8K2B3 (pp) Q8VEM8	false
2290	pp	Q8K2B3 (pp) Q8JZQ2	false
2291	pp	Q8K2B3 (pp) P97807	false
2292	pp	Q91WD5 (pp) Q9CPP6	false
2293	pp	Q91WD5 (pp) Q99LY9	false
2294	pp	Q91WD5 (pp) Q91YT0	false
2295	pp	Q91WD5 (pp) Q9DC69	false
2296	pp	Q91WD5 (pp) Q9WUM5	false
2297	pp	Q91WD5 (pp) P35486	false
2298	pp	Q91WD5 (pp) Q91VD9	false
2299	pp	Q91WD5 (pp) P09411	false
2300	pp	Q91WD5 (pp) Q9DB20	false
2301	pp	Q91WD5 (pp) Q9CZ13	false
2302	pp	Q91WD5 (pp) Q99LC5	false
2303	pp	Q91WD5 (pp) Q8BH95	false
2304	pp	Q91WD5 (pp) P17751	false
2305	pp	Q91WD5 (pp) P52503	false
2306	pp	Q91WD5 (pp) Q8K1Z0	false
2307	pp	Q91WD5 (pp) Q9ERS2	false
2308	pp	Q91WD5 (pp) Q9CQ75	false
2309	pp	Q91WD5 (pp) Q9D6J5	false
2310	pp	Q91WD5 (pp) Q8K3J1	false
2311	pp	Q91WD5 (pp) P56480	false
2312	pp	Q91WD5 (pp) Q6PB66	false
2313	pp	Q91WD5 (pp) Q8CAQ8	false
2314	pp	Q91WD5 (pp) Q7TMF3	false
2315	pp	Q91WD5 (pp) Q03265	false
2316	pp	Q91WD5 (pp) Q8BGH2	false
2317	pp	Q91WD5 (pp) P20108	false
2318	pp	Q91WD5 (pp) Q3ULD5	false
2319	pp	Q91WD5 (pp) Q9CR68	false
2320	pp	Q91WD5 (pp) Q9DCS9	false
2321	pp	Q91WD5 (pp) Q9D6J6	false
2322	pp	Q91WD5 (pp) Q9CXZ1	false
2323	pp	Q91WD5 (pp) Q9DB77	false
2324	pp	Q91WD5 (pp) Q9CQJ8	false
2325	pp	Q91WD5 (pp) Q9CQC7	false
2326	pp	Q91WD5 (pp) P97450	false
2327	pp	Q91WD5 (pp) Q9CQZ5	false
2328	pp	Q91WD5 (pp) Q99LC3	false
2329	pp	Q91WD5 (pp) Q99LX0	false
2330	pp	Q91WD5 (pp) Q9CQQ7	false
2331	pp	Q91WD5 (pp) P97807	false
2332	pp	Q91WD5 (pp) Q9DC70	false
2333	pp	Q91WD5 (pp) Q9CQH3	false
2334	pp	Q91WD5 (pp) Q9D855	false
2335	pp	Q91WD5 (pp) Q9CQ69	false
2336	pp	Q91WD5 (pp) Q91VR2	false
2337	pp	Q91WD5 (pp) Q99JY0	false
2338	pp	Q91WD5 (pp) Q99KI0	false
2339	pp	Q91WD5 (pp) Q9D0M3	false
2340	pp	Q91WD5 (pp) Q8VEM8	false
2341	pp	Q91WD5 (pp) P70404	false
2342	pp	Q91WD5 (pp) P08249	false
2343	pp	Q91WD5 (pp) Q9DCJ5	false
2344	pp	Q91WD5 (pp) Q99MN9	false
2345	pp	Q91WD5 (pp) Q9CQZ6	false
2346	pp	Q91WD5 (pp) Q8K2B3	false
2347	pp	P51881 (pp) P16054	false
2348	pp	P51881 (pp) P62259	false
2349	pp	P05480 (pp) P23242	false
2350	pp	P05480 (pp) P30999	false
2351	pp	P05480 (pp) P39053	false
2352	pp	P05480 (pp) P35438	false
2353	pp	P05480 (pp) P35436	false
2354	pp	Q02248 (pp) P63001	false
2355	pp	Q02248 (pp) Q01097	false
2356	pp	Q02248 (pp) O88712	false
2357	pp	Q02248 (pp) Q68FH0	false
2358	pp	Q02248 (pp) P68510	false
2359	pp	Q02248 (pp) P39688	false
2360	pp	Q02248 (pp) P35438	false
2361	pp	Q02248 (pp) Q61301	false
2362	pp	Q02248 (pp) P05480	false
2363	pp	P60710 (pp) O70589	false
2364	pp	P60710 (pp) Q9JM76	false
2365	pp	P60710 (pp) Q9CPW4	false
2366	pp	P60710 (pp) P16054	false
2367	pp	P60710 (pp) P35438	false
2368	pp	P60710 (pp) Q9D898	false
2369	pp	P60710 (pp) P59999	false
2370	pp	P60710 (pp) Q9R0Q6	false
2371	pp	Q6PHZ2 (pp) P68369	false
2372	pp	Q6PHZ2 (pp) P63101	false
2373	pp	Q6PHZ2 (pp) P35436	false
2374	pp	Q6PHZ2 (pp) P99024	false
2375	pp	Q6PHZ2 (pp) P60710	false
2376	pp	P97807 (pp) P05202	false
2377	pp	P97807 (pp) Q60931	false
2378	pp	P97807 (pp) Q9CQH3	false
2379	pp	P97807 (pp) Q921G7	false
2380	pp	P97807 (pp) Q9CR68	false
2381	pp	P97807 (pp) Q61425	false
2382	pp	P97807 (pp) Q8BMF4	false
2383	pp	P97807 (pp) P06745	false
2384	pp	P97807 (pp) Q9D6J6	false
2385	pp	P97807 (pp) Q9WUM5	false
2386	pp	P97807 (pp) P06151	false
2387	pp	P97807 (pp) Q8K3J1	false
2388	pp	P97807 (pp) Q91YT0	false
2389	pp	P97807 (pp) Q91VR2	false
2390	pp	P97807 (pp) Q05920	false
2391	pp	P97807 (pp) Q60597	false
2392	pp	P97807 (pp) Q9DC69	false
2393	pp	P97807 (pp) Q99LC5	false
2394	pp	P97807 (pp) Q9DCS9	false
2395	pp	P97807 (pp) Q9DCJ5	false
2396	pp	P97807 (pp) Q9DCD0	false
2397	pp	P97807 (pp) O08756	false
2398	pp	P97807 (pp) P48771	false
2399	pp	P97807 (pp) Q9CQQ7	false
2400	pp	P97807 (pp) Q9D6R2	false
2401	pp	P97807 (pp) Q9D2G2	false
2402	pp	P97807 (pp) Q99LX0	false
2403	pp	P97807 (pp) P54071	false
2404	pp	P97807 (pp) Q06185	false
2405	pp	Q9ERS2 (pp) Q9CQH3	false
2406	pp	Q9ERS2 (pp) Q9D6J6	false
2407	pp	Q9ERS2 (pp) O09111	false
2408	pp	Q9ERS2 (pp) Q91VR2	false
2409	pp	Q9ERS2 (pp) P50516	false
2410	pp	Q99KI0 (pp) Q9D6J6	false
2411	pp	Q99KI0 (pp) P05064	false
2412	pp	Q99KI0 (pp) P56480	false
2413	pp	Q99KI0 (pp) P97807	false
2414	pp	Q99KI0 (pp) Q01097	false
2415	pp	Q99KI0 (pp) Q03265	false
2416	pp	Q99KI0 (pp) Q9Z1J3	false
2417	pp	Q99KI0 (pp) P35486	false
2418	pp	Q99KI0 (pp) Q99LX0	false
2419	pp	Q99KI0 (pp) Q60597	false
2420	pp	Q99KI0 (pp) Q9WUM5	false
2421	pp	Q99KI0 (pp) P68510	false
2422	pp	Q99KI0 (pp) Q8K1M6	false
2423	pp	Q99KI0 (pp) Q9CPP6	false
2424	pp	Q99KI0 (pp) Q9D0M3	false
2425	pp	Q99KI0 (pp) Q9DCJ5	false
2426	pp	Q99KI0 (pp) Q9DB20	false
2427	pp	Q99KI0 (pp) P06745	false
2428	pp	Q99KI0 (pp) Q9CR68	false
2429	pp	Q99KI0 (pp) Q91YT0	false
2430	pp	Q99KI0 (pp) Q9ERS2	false
2431	pp	Q99KI0 (pp) Q9D6R2	false
2432	pp	Q99KI0 (pp) O09111	false
2433	pp	Q99KI0 (pp) P70404	false
2434	pp	Q99KI0 (pp) Q9D3D9	false
2435	pp	Q99KI0 (pp) Q05920	false
2436	pp	Q99KI0 (pp) P52480	false
2437	pp	Q99KI0 (pp) P47857	false
2438	pp	Q99KI0 (pp) P54071	false
2439	pp	Q99KI0 (pp) P63038	false
2440	pp	Q99KI0 (pp) Q9CZ13	false
2441	pp	Q99KI0 (pp) Q9DB77	false
2442	pp	Q99KI0 (pp) Q9DC69	false
2443	pp	Q99KI0 (pp) P17751	false
2444	pp	Q99KI0 (pp) Q9CQH3	false
2445	pp	Q99KI0 (pp) Q91VR2	false
2446	pp	Q99KI0 (pp) Q62351	false
2447	pp	Q99KI0 (pp) Q9D2G2	false
2448	pp	O08788 (pp) O35465	false
2449	pp	Q99KJ8 (pp) P28667	false
2450	pp	Q99KJ8 (pp) O08788	false
2451	pp	Q91Z53 (pp) P45376	false
2452	pp	P26443 (pp) Q9DCD0	false
2453	pp	P26443 (pp) P54071	false
2454	pp	P26443 (pp) P48320	false
2455	pp	P26443 (pp) Q99KI0	false
2456	pp	P26443 (pp) P63038	false
2457	pp	P26443 (pp) P56480	false
2458	pp	P26443 (pp) P70404	false
2459	pp	P26443 (pp) Q60597	false
2460	pp	P26443 (pp) P17751	false
2461	pp	P26443 (pp) P61922	false
2462	pp	P26443 (pp) Q05920	false
2463	pp	P26443 (pp) P05063	false
2464	pp	P26443 (pp) P29758	false
2465	pp	P26443 (pp) Q8CHT0	false
2466	pp	P26443 (pp) Q8BH04	false
2467	pp	P26443 (pp) Q9D6R2	false
2468	pp	P26443 (pp) P15105	false
2469	pp	P26443 (pp) P05202	false
2470	pp	P26443 (pp) P97807	false
2471	pp	P26443 (pp) Q61425	false
2472	pp	P26443 (pp) Q91Z53	false
2473	pp	Q62442 (pp) P61264	false
2474	pp	Q9D172 (pp) Q9DC70	false
2475	pp	Q9D172 (pp) P42125	false
2476	pp	Q9D172 (pp) Q9DCJ5	false
2477	pp	Q9D172 (pp) Q8BH95	false
2478	pp	Q9D172 (pp) Q91WD5	false
2479	pp	Q9D172 (pp) Q9CZ13	false
2480	pp	Q9D172 (pp) Q9DCT2	false
2481	pp	Q9D172 (pp) Q9CQZ5	false
2482	pp	Q9D172 (pp) Q91YT0	false
2483	pp	Q9D172 (pp) P97807	false
2484	pp	Q9D172 (pp) Q9CQH3	false
2485	pp	P56391 (pp) Q9DCX2	false
2486	pp	P56391 (pp) P17665	false
2487	pp	P56391 (pp) P00405	false
2488	pp	P56391 (pp) Q9ERS2	false
2489	pp	P56391 (pp) Q9D3D9	false
2490	pp	P56391 (pp) O09111	false
2491	pp	Q9WV18 (pp) Q80T41	false
2492	pp	O35526 (pp) O08599	false
2493	pp	O35526 (pp) P60879	false
2494	pp	O35526 (pp) P63040	false
2495	pp	O35526 (pp) Q62442	false
2496	pp	Q8R5M8 (pp) O70589	false
2497	pp	Q9WV92 (pp) P12023	false
2498	pp	Q9WV92 (pp) Q8R5M8	false
2499	pp	P62814 (pp) Q9Z1G4	false
2500	pp	P62814 (pp) Q9WTT4	false
2501	pp	P62814 (pp) P50518	false
2502	pp	P62814 (pp) Q91VM9	false
2503	pp	P62814 (pp) P63082	false
2504	pp	P62814 (pp) Q9Z1G3	false
2505	pp	P62814 (pp) Q9DC69	false
2506	pp	P62814 (pp) P57746	false
2507	pp	P62814 (pp) Q8BVE3	false
2508	pp	P62814 (pp) P50516	false
2509	pp	P62814 (pp) P51863	false
2510	pp	P12023 (pp) P61264	false
2511	pp	P12023 (pp) P63017	false
2512	pp	P12023 (pp) P11627	false
2513	pp	P12023 (pp) Q61316	false
2514	pp	P12023 (pp) Q9CQV8	false
2515	pp	P12023 (pp) Q9Z1G4	false
2516	pp	P12023 (pp) Q68FD5	false
2517	pp	P12023 (pp) P01831	false
2518	pp	P12023 (pp) Q62420	false
2519	pp	P12023 (pp) P97300	false
2520	pp	P12023 (pp) O55042	false
2521	pp	P12023 (pp) P60879	false
2522	pp	P12023 (pp) P46660	false
2523	pp	P12023 (pp) Q812A2	false
2524	pp	P12023 (pp) O54991	false
2525	pp	P12023 (pp) P28652	false
2526	pp	P12023 (pp) Q91ZZ3	false
2527	pp	P12023 (pp) P57780	false
2528	pp	P12023 (pp) P46096	false
2529	pp	P12023 (pp) P62821	false
2530	pp	P12023 (pp) P08551	false
2531	pp	P12023 (pp) P12960	false
2532	pp	P12023 (pp) P39053	false
2533	pp	P12023 (pp) O08599	false
2534	pp	P12023 (pp) P68510	false
2535	pp	P12023 (pp) P60710	false
2536	pp	P12023 (pp) P63101	false
2537	pp	P12023 (pp) Q9JIS5	false
2538	pp	P12023 (pp) P13595	false
2539	pp	P12023 (pp) O88737	false
2540	pp	P12023 (pp) P61982	false
2541	pp	P12023 (pp) P07901	false
2542	pp	P12023 (pp) O88935	false
2543	pp	P12023 (pp) Q64332	false
2544	pp	P12023 (pp) P56564	false
2545	pp	P12023 (pp) P35564	false
2546	pp	P12023 (pp) Q60932	false
2547	pp	P12023 (pp) Q61548	false
2548	pp	P12023 (pp) Q9D6F9	false
2549	pp	P12023 (pp) P62259	false
2550	pp	P12023 (pp) Q810U3	false
2551	pp	P12023 (pp) Q9Z1G3	false
2552	pp	P12023 (pp) Q62277	false
2553	pp	P12023 (pp) Q9JHU4	false
2554	pp	P12023 (pp) Q8VDN2	false
2555	pp	P12023 (pp) P68254	false
2556	pp	P12023 (pp) O08756	false
2557	pp	P12023 (pp) O35526	false
2558	pp	P12023 (pp) P63011	false
2559	pp	P12023 (pp) P06837	false
2560	pp	P12023 (pp) Q9CZT8	false
2561	pp	P12023 (pp) P62823	false
2562	pp	P12023 (pp) P63044	false
2563	pp	P12023 (pp) P04925	false
2564	pp	P12023 (pp) Q9WV18	false
2565	pp	P12023 (pp) P46460	false
2566	pp	P61922 (pp) Q9EQ20	false
2567	pp	P61922 (pp) P15105	false
2568	pp	P61922 (pp) Q9DBF1	false
2569	pp	P48320 (pp) P15105	false
2570	pp	P48320 (pp) P61922	false
2571	pp	P17710 (pp) Q9WUA3	false
2572	pp	P05064 (pp) P05063	false
2573	pp	P05064 (pp) Q61735	false
2574	pp	P05064 (pp) P17182	false
2575	pp	P05064 (pp) Q9WUA3	false
2576	pp	P05064 (pp) P17710	false
2577	pp	P11499 (pp) Q9CR16	false
2578	pp	P11499 (pp) P60710	false
2579	pp	P11499 (pp) P63037	false
2580	pp	P11499 (pp) P63038	false
2581	pp	P11499 (pp) Q60864	false
2582	pp	P11499 (pp) P62259	false
2583	pp	Q8K1Z0 (pp) Q9ERS2	false
2584	pp	Q8K1Z0 (pp) Q9D6J6	false
2585	pp	Q8K1Z0 (pp) Q9WUM5	false
2586	pp	Q8K1Z0 (pp) Q9DCJ5	false
2587	pp	P62331 (pp) O70161	false
2588	pp	Q99LX0 (pp) Q9CQH3	false
2589	pp	Q99LX0 (pp) Q91VR2	false
2590	pp	Q99LX0 (pp) O08756	false
2591	pp	Q99LX0 (pp) O55042	false
2592	pp	Q99LX0 (pp) Q9D6J6	false
2593	pp	Q99LX0 (pp) O09111	false
2594	pp	Q99LX0 (pp) Q62277	false
2595	pp	Q8BGH2 (pp) Q91YT0	false
2596	pp	Q8BGH2 (pp) Q9WUM5	false
2597	pp	Q8BGH2 (pp) Q9DCJ5	false
2598	pp	Q8BGH2 (pp) Q9CRB9	false
2599	pp	Q8BGH2 (pp) P97807	false
2600	pp	Q8BGH2 (pp) O88441	false
2601	pp	Q8BGH2 (pp) Q9QYA2	false
2602	pp	Q8BGH2 (pp) Q9DC69	false
2603	pp	Q8BGH2 (pp) Q9CZ13	false
2604	pp	Q8BGH2 (pp) Q8CAQ8	false
2605	pp	Q8BGH2 (pp) Q8BH95	false
2606	pp	Q8BGH2 (pp) Q99LX0	false
2607	pp	Q99LC5 (pp) Q9DC69	false
2608	pp	Q99LC5 (pp) O88441	false
2609	pp	Q99LC5 (pp) Q9CR68	false
2610	pp	Q99LC5 (pp) Q9WUM5	false
2611	pp	Q99LC5 (pp) Q8BWT1	false
2612	pp	Q99LC5 (pp) Q9Z0X1	false
2613	pp	Q99LC5 (pp) Q91YT0	false
2614	pp	Q99LC5 (pp) O08756	false
2615	pp	Q99LC5 (pp) Q99JY0	false
2616	pp	Q99LC5 (pp) Q9DBL1	false
2617	pp	Q99LC5 (pp) Q91VR2	false
2618	pp	Q99LC5 (pp) Q80U28	false
2619	pp	Q99LC5 (pp) Q9CQH3	false
2620	pp	Q99LC5 (pp) Q91ZJ5	false
2621	pp	Q99LC5 (pp) Q6PB66	false
2622	pp	Q99LC5 (pp) Q9DCJ5	false
2623	pp	Q99LC5 (pp) Q9D6J6	false
2624	pp	Q99LC5 (pp) P50544	false
2625	pp	Q99LC5 (pp) O09111	false
2626	pp	Q61425 (pp) Q9EQ20	false
2627	pp	Q61425 (pp) Q8QZT1	false
2628	pp	Q61425 (pp) P47738	false
2629	pp	Q61425 (pp) O08756	false
2630	pp	Q61425 (pp) Q99JY0	false
2631	pp	Q61425 (pp) Q8BWT1	false
2632	pp	Q61425 (pp) Q9CQ62	false
2633	pp	Q61425 (pp) Q8BMS1	false
2634	pp	Q61425 (pp) Q9CZS1	false
2635	pp	Q61425 (pp) Q9D0K2	false
2636	pp	Q61425 (pp) Q9DBL1	false
2637	pp	Q61425 (pp) Q9WUM5	false
2638	pp	Q61425 (pp) Q99LC5	false
2639	pp	P12787 (pp) P56480	false
2640	pp	P12787 (pp) Q06185	false
2641	pp	P12787 (pp) Q9CXZ1	false
2642	pp	P12787 (pp) Q9CQZ6	false
2643	pp	P12787 (pp) P19536	false
2644	pp	P12787 (pp) P43024	false
2645	pp	P12787 (pp) Q9DB77	false
2646	pp	P12787 (pp) Q9CQA3	false
2647	pp	P12787 (pp) Q9D855	false
2648	pp	P12787 (pp) Q03265	false
2649	pp	P12787 (pp) P09671	false
2650	pp	P12787 (pp) Q9CQH3	false
2651	pp	P12787 (pp) Q9DCX2	false
2652	pp	P12787 (pp) Q99LC3	false
2653	pp	P12787 (pp) Q91VR2	false
2654	pp	P12787 (pp) Q9CQ54	false
2655	pp	P12787 (pp) Q9DC70	false
2656	pp	P12787 (pp) Q9CPQ1	false
2657	pp	P12787 (pp) Q9CQJ8	false
2658	pp	P12787 (pp) Q9CQ69	false
2659	pp	P12787 (pp) Q9D6J5	false
2660	pp	P12787 (pp) Q9D0M3	false
2661	pp	P12787 (pp) Q9DCJ5	false
2662	pp	P12787 (pp) Q9CQZ5	false
2663	pp	P12787 (pp) P00405	false
2664	pp	P12787 (pp) Q9DB20	false
2665	pp	P12787 (pp) Q9D6J6	false
2666	pp	P12787 (pp) Q9CQQ7	false
2667	pp	P12787 (pp) P19783	false
2668	pp	P12787 (pp) Q9ERS2	false
2669	pp	P12787 (pp) P56391	false
2670	pp	P12787 (pp) Q9DCT2	false
2671	pp	P12787 (pp) P97450	false
2672	pp	P12787 (pp) Q9DCW4	false
2673	pp	P12787 (pp) Q9DC69	false
2674	pp	P12787 (pp) P17665	false
2675	pp	P12787 (pp) Q8VEM8	false
2676	pp	P12787 (pp) Q7TMF3	false
2677	pp	P12787 (pp) Q8K3J1	false
2678	pp	P12787 (pp) Q9D3D9	false
2679	pp	P12787 (pp) Q99LC5	false
2680	pp	P12787 (pp) Q9DCS9	false
2681	pp	P12787 (pp) Q9D6R2	false
2682	pp	P12787 (pp) P52503	false
[truncated: 1,394 more rows]
