# Supplementary material for: APP Is a Context-Sensitive Regulator of the Hippocampal Presynaptic Active Zone
Source: PLOS journal article supplement (doi:10.1371/journal.pcbi.1004832), 2016-04-19
Supplement: S6 (10.1371/journal.pcbi.1004832.s006) [file journal.pcbi.1004832.s006.cys › CytoscapeSession-2016_01_22-10_07/tables/4077-Cytoskeleton+Subnetwork/LOCAL_ATTRS-org.cytoscape.model.CyEdge-Cytoskeleton+Subnetwork+default+edge.cytable]

CyCSV-Version	1
SUID	interaction	name	selected
java.lang.Long	java.lang.String	java.lang.String	java.lang.Boolean
Cytoskeleton Subnetwork default edge
4088	undirected	Node 1 (undirected) P59999	false
4089	undirected	Node 1 (undirected) Q9JM76	false
4090	undirected	Node 1 (undirected) Q9CVB6	false
4091	undirected	Node 1 (undirected) Q99JY9	false
4092	undirected	Node 1 (undirected) P63085	false
4093	undirected	Node 1 (undirected) P61161	false
4094	undirected	P30999 (undirected) Node 1	false
2370	pp	P60710 (pp) Q9R0Q6	false
2369	pp	P60710 (pp) P59999	false
2368	pp	P60710 (pp) Q9D898	false
831	pp	Q61644 (pp) P10637	false
2366	pp	P60710 (pp) P16054	false
2365	pp	P60710 (pp) Q9CPW4	false
2364	pp	P60710 (pp) Q9JM76	false
1590	pp	Q99JY9 (pp) P59999	false
1589	pp	Q99JY9 (pp) Q9JM76	false
1587	pp	P47754 (pp) P16054	false
2354	pp	Q02248 (pp) P63001	false
1585	pp	P47754 (pp) P47757	false
1840	pp	P46660 (pp) P19246	false
1071	pp	P62746 (pp) P63330	false
1839	pp	Q9JHU4 (pp) Q60996	false
1838	pp	Q9JHU4 (pp) Q99KJ8	false
1836	pp	Q9JHU4 (pp) P68368	false
1833	pp	Q9JHU4 (pp) O08788	false
802	pp	P18760 (pp) P40124	false
1570	pp	P62962 (pp) Q9JJV2	false
1569	pp	P62962 (pp) P59999	false
1057	pp	P99024 (pp) Q6PER3	false
1056	pp	P99024 (pp) P60879	false
1567	pp	P62962 (pp) P99024	false
798	pp	P08551 (pp) P19246	false
1566	pp	P62962 (pp) P60710	false
1309	pp	Q9CVB6 (pp) Q9JM76	false
1565	pp	P16054 (pp) P47757	false
1308	pp	Q9CVB6 (pp) Q9CPW4	false
2075	pp	Q9JLB0 (pp) Q99N28	false
795	pp	P08553 (pp) P19246	false
2074	pp	Q9JLB0 (pp) Q8R5M8	false
1306	pp	Q9CVB6 (pp) Q9R0Q6	false
794	pp	P08553 (pp) P46660	false
2073	pp	Q9JLB0 (pp) O70318	false
1305	pp	Q9CVB6 (pp) P60710	false
1304	pp	Q9CVB6 (pp) Q99JY9	false
1303	pp	Q9CVB6 (pp) Q9D898	false
1559	pp	P16054 (pp) P23242	false
1302	pp	Q9CVB6 (pp) P47757	false
1301	pp	Q9CVB6 (pp) P59999	false
783	pp	Q7TMB8 (pp) P28660	false
782	pp	Q7TMB8 (pp) Q9JJV2	false
779	pp	O88643 (pp) P63001	false
777	pp	O88643 (pp) Q68FF6	false
1283	pp	O88737 (pp) Q6PH08	false
1017	pp	P30999 (pp) Q02248	false
2553	pp	P12023 (pp) Q9JHU4	false
2039	pp	Q9R0Q6 (pp) Q9JM76	false
2038	pp	Q9R0Q6 (pp) P59999	false
2037	pp	Q9R0Q6 (pp) Q9CPW4	false
2036	pp	Q9JM76 (pp) Q9D898	false
2548	pp	P12023 (pp) Q9D6F9	false
2034	pp	Q9JM76 (pp) P59999	false
1009	pp	Q62261 (pp) P16546	false
2543	pp	P12023 (pp) Q64332	false
2539	pp	P12023 (pp) O88737	false
746	pp	Q91VR7 (pp) P14873	false
2537	pp	P12023 (pp) Q9JIS5	false
1000	pp	Q9JIS5 (pp) Q68FF6	false
2535	pp	P12023 (pp) P60710	false
2530	pp	P12023 (pp) P08551	false
993	pp	O70318 (pp) P63001	false
1248	pp	P15116 (pp) Q02248	false
2527	pp	P12023 (pp) P57780	false
1246	pp	P15116 (pp) P23242	false
1245	pp	P15116 (pp) P30999	false
989	pp	Q64332 (pp) Q9JJV2	false
732	pp	Q03157 (pp) P12023	false
2524	pp	P12023 (pp) O54991	false
2523	pp	P12023 (pp) Q812A2	false
2522	pp	P12023 (pp) P46660	false
2521	pp	P12023 (pp) P60879	false
2520	pp	P12023 (pp) O55042	false
727	pp	P20152 (pp) P16054	false
2517	pp	P12023 (pp) P01831	false
1747	pp	Q9JJV2 (pp) P60710	false
1746	pp	Q9JJV2 (pp) Q9QXS6	false
720	pp	Q9ERD7 (pp) P47757	false
2768	pp	Q6PER3 (pp) O08788	false
3788	pp	Q9QUI0 (pp) Q06335	false
3786	pp	Q9QUI0 (pp) P30999	false
3785	pp	Q9QUI0 (pp) P63001	false
713	pp	Q9CYT6 (pp) P40124	false
1992	pp	P60879 (pp) P28660	false
3784	pp	Q9QUI0 (pp) O88643	false
3782	pp	Q06335 (pp) P63330	false
3268	pp	P63085 (pp) Q64010	false
3780	pp	Q06335 (pp) P12023	false
3779	pp	Q06335 (pp) P63001	false
3778	pp	Q06335 (pp) Q03157	false
2498	pp	Q9WV92 (pp) Q8R5M8	false
1217	pp	Q9CPW4 (pp) P59999	false
2497	pp	Q9WV92 (pp) P12023	false
1216	pp	Q9CPW4 (pp) Q9JM76	false
1982	pp	P60879 (pp) P68368	false
1981	pp	P60879 (pp) Q7TSJ2	false
698	pp	P23927 (pp) P16054	false
1976	pp	P60879 (pp) O55042	false
695	pp	P58771 (pp) P16054	false
1974	pp	P28660 (pp) Q9JJV2	false
691	pp	O88342 (pp) Q9CVB6	false
690	pp	O88342 (pp) P47757	false
689	pp	O88342 (pp) P18760	false
1953	pp	P49615 (pp) P19246	false
920	pp	P20357 (pp) Q9ERD7	false
1176	pp	Q99104 (pp) P08551	false
917	pp	P20357 (pp) P14873	false
2450	pp	Q99KJ8 (pp) O08788	false
2449	pp	Q99KJ8 (pp) P28667	false
1167	pp	P10637 (pp) P12023	false
1165	pp	P10637 (pp) O55042	false
1163	pp	P10637 (pp) Q9D8Y0	false
1670	pp	Q9D898 (pp) P59999	false
3695	pp	P47757 (pp) O89053	false
3694	pp	Q8C8R3 (pp) P16546	false
3691	pp	P16546 (pp) O08788	false
3690	pp	P63330 (pp) Q76MZ3	false
2922	pp	P31938 (pp) P63085	false
3689	pp	P63330 (pp) Q60996	false
3432	pp	Q3UHD9 (pp) Q9Z2H5	false
3688	pp	P63330 (pp) Q61151	false
2920	pp	P31938 (pp) P16054	false
3431	pp	Q9Z2H5 (pp) Q99N28	false
870	pp	Q9CQI6 (pp) P60710	false
3686	pp	P63330 (pp) Q6P1F6	false
3685	pp	Q76MZ3 (pp) Q6P1F6	false
3684	pp	Q76MZ3 (pp) O08788	false
3681	pp	Q76MZ3 (pp) Q99KJ8	false
3680	pp	Q76MZ3 (pp) Q60996	false
3676	pp	Q76MZ3 (pp) P18052	false
3675	pp	Q76MZ3 (pp) Q61151	false
32572	undirected	P68369 (undirected) Q9JHU4	false
32574	undirected	P68369 (undirected) P27546	false
