# Supplementary material for: APP Is a Context-Sensitive Regulator of the Hippocampal Presynaptic Active Zone
Source: PLOS journal article supplement (doi:10.1371/journal.pcbi.1004832), 2016-04-19
Supplement: S6 (10.1371/journal.pcbi.1004832.s006) [file journal.pcbi.1004832.s006.cys › CytoscapeSession-2016_01_22-10_07/tables/4077-Cytoskeleton+Subnetwork/LOCAL_ATTRS-org.cytoscape.model.CyNode-Cytoskeleton+Subnetwork+default+node.cytable]

CyCSV-Version	1
SUID	1_Localization	APP-KO/wt	Community	Gene names	Gene names (primary )	name	NexCre/wt	Organism	Organism ID	Protein names	selected	Status	Subcommunities
java.lang.Long	java.lang.String	java.lang.Double	java.lang.Integer	java.lang.String	java.lang.String	java.lang.String	java.lang.Double	java.lang.String	java.lang.Integer	java.lang.String	java.lang.Boolean	java.lang.String	java.lang.String
	mutable	mutable	mutable	mutable	mutable		mutable	mutable	mutable	mutable		mutable	mutable
Cytoskeleton Subnetwork default node
4087	Cytoskeleton	1.03	1	Cttn Ems1	Cttn	Q60598	0.874	Mus musculus (Mouse)	10090	Src substrate cortactin	false	reviewed	1_8
241	Cytoskeleton	0.813	1	Cotl1 Clp	Cotl1	Q9CQI6	0.911	Mus musculus (Mouse)	10090	Coactosin-like protein	false	reviewed	1_8
118	Cytoskeleton	1.007	1	Tubb3	Tubb3	Q9ERD7	1.014	Mus musculus (Mouse)	10090	Tubulin beta-3 chain	false	reviewed	1_5
503	Signaling Cascade	1.095	1	Cdk5 Cdkn5 Crk6	Cdk5	P49615	1.014	Mus musculus (Mouse)	10090	Cyclin-dependent-like kinase 5 (EC 2.7.11.1) (CR6 protein kinase) (CRK6) (Cell division protein kinase 5) (Serine/threonine-protein kinase PSSALRE) (Tau protein kinase II catalytic subunit) (TPKII catalytic subunit)	false	reviewed	1_5
376	Cytoskeleton	0.905	1	Arpc5	Arpc5	Q9CPW4	0.861	Mus musculus (Mouse)	10090	Actin-related protein 2/3 complex subunit 5 (Arp2/3 complex 16 kDa subunit) (p16-ARC)	false	reviewed	1_8
123	Cytoskeleton	1.139	1	Vim	Vim	P20152	0.935	Mus musculus (Mouse)	10090	Vimentin	false	reviewed	1_5
635	Signaling Cascade	1.021	1	Mapk1 Erk2 Mapk Prkm1	Mapk1	P63085	0.966	Mus musculus (Mouse)	10090	Mitogen-activated protein kinase 1 (MAP kinase 1) (MAPK 1) (EC 2.7.11.24) (ERT1) (Extracellular signal-regulated kinase 2) (ERK-2) (MAP kinase isoform p42) (p42-MAPK) (Mitogen-activated protein kinase 2) (MAP kinase 2) (MAPK 2)	false	reviewed	1_1
508	Signaling Cascade	1.048	2	Nckap1 Hem2 Kiaa0587 Nap1	Nckap1	P28660	0.937	Mus musculus (Mouse)	10090	Nck-associated protein 1 (NAP 1) (Brain protein H19) (MH19) (Membrane-associated protein HEM-2) (p125Nap1)	false	reviewed	2_1
509	Plasma Membrane	0.917	1	Snap25 Snap	Snap25	P60879	0.997	Mus musculus (Mouse)	10090	Synaptosomal-associated protein 25 (SNAP-25) (Super protein) (SUP) (Synaptosomal-associated 25 kDa protein)	false	reviewed	1_3
384	Plasma Membrane	0.879	1	Cdh2	Cdh2	P15116	1.051	Mus musculus (Mouse)	10090	Cadherin-2 (Neural cadherin) (N-cadherin) (CD antigen CD325)	false	reviewed	1_5
512	Cytoskeleton	0.917	1	Arpc3	Arpc3	Q9JM76	0.995	Mus musculus (Mouse)	10090	Actin-related protein 2/3 complex subunit 3 (Arp2/3 complex 21 kDa subunit) (p21-ARC)	false	reviewed	1_8
513	Cytoskeleton	1.016	1	Arpc1a Sid329	Arpc1a	Q9R0Q6	0.928	Mus musculus (Mouse)	10090	Actin-related protein 2/3 complex subunit 1A (SOP2-like protein) (Sid 329)	false	reviewed	1_8
133	Plasma Membrane	1.0	1	Aplp1	Aplp1	Q03157	1.0	Mus musculus (Mouse)	10090	Amyloid-like protein 1 (APLP) (APLP-1) [Cleaved into: C30]	false	reviewed	1_2
261	Signaling Cascade	0.999	1	Ppp2r2a	Ppp2r2a	Q6P1F6	0.967	Mus musculus (Mouse)	10090	Serine/threonine-protein phosphatase 2A 55 kDa regulatory subunit B alpha isoform (PP2A subunit B isoform B55-alpha) (PP2A subunit B isoform PR55-alpha) (PP2A subunit B isoform R2-alpha) (PP2A subunit B isoform alpha)	false	reviewed	1_7
518	Plasma Membrane	0.956	1	Cadm3 Igsf4b Necl1 Syncam3 Tsll1	Cadm3	Q99N28	1.038	Mus musculus (Mouse)	10090	Cell adhesion molecule 3 (Immunoglobulin superfamily member 4B) (IgSF4B) (Nectin-like protein 1) (NECL-1) (Synaptic cell adhesion molecule 3) (TSLC1-like protein 1)	false	reviewed	1_9
263	Cytoskeleton	0.959	2	Tubb4a Tubb4	Tubb4a	Q9D6F9	0.979	Mus musculus (Mouse)	10090	Tubulin beta-4A chain (Tubulin beta-4 chain)	false	reviewed	2_1
519	Plasma Membrane	0.995	1	Mpp6 Dlgh4 Pals2	Mpp6	Q9JLB0	0.963	Mus musculus (Mouse)	10090	MAGUK p55 subfamily member 6 (Dlgh4 protein) (P55T protein) (Protein associated with Lin-7 2)	false	reviewed	1_9
648	Cytoskeleton	1.046	1	Epb41l1 Epb4 Epb4.1l1 Kiaa0338	Epb41l1	Q9Z2H5	0.98	Mus musculus (Mouse)	10090	Band 4.1-like protein 1 (Neuronal protein 4.1) (4.1N)	false	reviewed	1_9
137	Signaling Cascade	0.949	1	Ppp2r5e Kiaa4006	Ppp2r5e	Q61151	0.989	Mus musculus (Mouse)	10090	Serine/threonine-protein phosphatase 2A 56 kDa regulatory subunit epsilon isoform (PP2A B subunit isoform B'-epsilon) (PP2A B subunit isoform B56-epsilon) (PP2A B subunit isoform PR61-epsilon) (PP2A B subunit isoform R5-epsilon)	false	reviewed	1_7
649	Signaling Cascade	0.993	1	Agap2 Centg1 Kiaa0167	Agap2	Q3UHD9	1.067	Mus musculus (Mouse)	10090	Arf-GAP with GTPase, ANK repeat and PH domain-containing protein 2 (AGAP-2) (Centaurin-gamma-1) (Cnt-g1) (Phosphatidylinositol 3-kinase enhancer) (PIKE)	false	reviewed	1_9
394	Plasma Membrane	0.859	1	Erc2 Cast1 D14Ertd171e Kiaa0378	Erc2	Q6PH08	1.053	Mus musculus (Mouse)	10090	ERC protein 2 (CAZ-associated structural protein 1) (CAST1)	false	reviewed	1_12
395	Cytoskeleton	0.924	1	Bsn Kiaa0434	Bsn	O88737	1.057	Mus musculus (Mouse)	10090	Protein bassoon	false	reviewed	1_12
397	Cytoskeleton	1.009	1	Arpc2	Arpc2	Q9CVB6	0.925	Mus musculus (Mouse)	10090	Actin-related protein 2/3 complex subunit 2 (Arp2/3 complex 34 kDa subunit) (p34-ARC)	false	reviewed	1_8
270	Cytoskeleton	0.971	1	Map2 Mtap2	Map2	P20357	0.958	Mus musculus (Mouse)	10090	Microtubule-associated protein 2 (MAP-2)	false	reviewed	1_1
398	Cytoskeleton	0.879	1	Arpc4 Arc20	Arpc4	P59999	0.871	Mus musculus (Mouse)	10090	Actin-related protein 2/3 complex subunit 4 (Arp2/3 complex 20 kDa subunit) (p20-ARC)	false	reviewed	1_8
143	Cytoskeleton	1.059	1	Map1lc3a	Map1lc3a	Q91VR7	0.927	Mus musculus (Mouse)	10090	Microtubule-associated proteins 1A/1B light chain 3A (Autophagy-related protein LC3 A) (Autophagy-related ubiquitin-like modifier LC3 A) (MAP1 light chain 3-like protein 1) (MAP1A/MAP1B light chain 3 A) (MAP1A/MAP1B LC3 A) (Microtubule-associated protein 1 light chain 3 alpha)	false	reviewed	1_7
271	Plasma Membrane	0.935	2	Thy1 Thy-1	Thy1	P01831	0.914	Mus musculus (Mouse)	10090	Thy-1 membrane glycoprotein (Thy-1 antigen) (CD antigen CD90)	false	reviewed	2_6
273	Signaling Cascade	0.939	1	Marcksl1 Mlp Mrp	Marcksl1	P28667	0.743	Mus musculus (Mouse)	10090	MARCKS-related protein (Brain protein F52) (MARCKS-like protein 1) (Macrophage myristoylated alanine-rich C kinase substrate) (Mac-MARCKS) (MacMARCKS)	false	reviewed	1_7
274	Synaptic Vesicle	0.836	1	Snca Syn	Snca	O55042	0.528	Mus musculus (Mouse)	10090	Alpha-synuclein (Non-A beta component of AD amyloid) (Non-A4 component of amyloid precursor) (NACP)	false	reviewed	1_3
660	Signaling Cascade	0.998	1	Ppp2r1a	Ppp2r1a	Q76MZ3	0.93	Mus musculus (Mouse)	10090	Serine/threonine-protein phosphatase 2A 65 kDa regulatory subunit A alpha isoform (PP2A subunit A isoform PR65-alpha) (PP2A subunit A isoform R1-alpha)	false	reviewed	1_7
661	Signaling Cascade	1.016	1	Ppp2ca	Ppp2ca	P63330	0.959	Mus musculus (Mouse)	10090	Serine/threonine-protein phosphatase 2A catalytic subunit alpha isoform (PP2A-alpha) (EC 3.1.3.16)	false	reviewed	1_7
662	Cytoskeleton	1.081	1	Sptan1 Spna2 Spta2	Sptan1	P16546	0.996	Mus musculus (Mouse)	10090	Spectrin alpha chain, non-erythrocytic 1 (Alpha-II spectrin) (Fodrin alpha chain)	false	reviewed	1_2
663	Plasma Membrane	1.008	1	Ank2	Ank2	Q8C8R3	0.986	Mus musculus (Mouse)	10090	Ankyrin-2 (ANK-2) (Brain ankyrin)	false	reviewed	1_2
280	Plasma Membrane	1.006	6	Cntnap1 Nrxn4	Cntnap1	O54991	1.048	Mus musculus (Mouse)	10090	Contactin-associated protein 1 (Caspr) (Caspr1) (MHDNIV) (NCP1) (Neurexin IV) (Neurexin-4) (Paranodin)	false	reviewed	6_3
664	Cytoskeleton	1.086	1	Capzb Cappb1	Capzb	P47757	0.991	Mus musculus (Mouse)	10090	F-actin-capping protein subunit beta (CapZ beta)	false	reviewed	1_5
409	Cytoskeleton	0.952	1	Mapre2	Mapre2	Q8R001	1.068	Mus musculus (Mouse)	10090	Microtubule-associated protein RP/EB family member 2 (APC-binding protein EB2) (End-binding protein 2) (EB2)	false	reviewed	1_4
156	Cytoskeleton	1.003	1	Actn4	Actn4	P57780	1.024	Mus musculus (Mouse)	10090	Alpha-actinin-4 (Non-muscle alpha-actinin 4)	false	reviewed	1_2
158	Plasma Membrane	1.013	1	Gja1 Cxn-43	Gja1	P23242	1.006	Mus musculus (Mouse)	10090	Gap junction alpha-1 protein (Connexin-43) (Cx43) (Gap junction 43 kDa heart protein)	false	reviewed	1_5
672	Plasma Membrane	1.0	1	Aplp2	Aplp2	Q06335	1.0	Mus musculus (Mouse)	10090	Amyloid-like protein 2 (APLP-2) (CDEI box-binding protein) (CDEBP)	false	reviewed	1_2
417	Cytoskeleton	1.001	1	Map1b Mtap1b Mtap5	Map1b	P14873	1.02	Mus musculus (Mouse)	10090	Microtubule-associated protein 1B (MAP-1B) (MAP1(X)) (MAP1.2) [Cleaved into: MAP1B heavy chain; MAP1 light chain LC1]	false	reviewed	1_7
673	Signaling Cascade	1.046	1	Rhoa Arha Arha2	Rhoa	Q9QUI0	0.967	Mus musculus (Mouse)	10090	Transforming protein RhoA	false	reviewed	1_6
547	Signaling Cascade	1.043	1	Ctnnb1 Catnb	Ctnnb1	Q02248	0.972	Mus musculus (Mouse)	10090	Catenin beta-1 (Beta-catenin)	false	reviewed	1_5
164	Signaling Cascade	1.029	1	Pak1 Paka	Pak1	O88643	0.986	Mus musculus (Mouse)	10090	Serine/threonine-protein kinase PAK 1 (EC 2.7.11.1) (Alpha-PAK) (CDC42/RAC effector kinase PAK-A) (p21-activated kinase 1) (PAK-1) (p65-PAK)	false	reviewed	1_6
292	Synaptic Vesicle	1.032	1	Syn2	Syn2	Q64332	0.941	Mus musculus (Mouse)	10090	Synapsin-2 (Synapsin II)	false	reviewed	1_4
548	Cytoskeleton	1.043	1	Actb	Actb	P60710	1.007	Mus musculus (Mouse)	10090	Actin, cytoplasmic 1 (Beta-actin) [Cleaved into: Actin, cytoplasmic 1, N-terminally processed]	false	reviewed	1_8
293	Cytoskeleton	0.915	1	Epb41l2 Epb4.1l2	Epb41l2	O70318	0.987	Mus musculus (Mouse)	10090	Band 4.1-like protein 2 (Generally expressed protein 4.1) (4.1G)	false	reviewed	1_9
166	Cytoskeleton	1.034	2	Cyfip1 Kiaa0068 Shyc Sra1	Cyfip1	Q7TMB8	0.981	Mus musculus (Mouse)	10090	Cytoplasmic FMR1-interacting protein 1 (Specifically Rac1-associated protein 1) (Sra-1)	false	reviewed	2_1
297	Synaptic Vesicle	0.997	1	Sv2a Kiaa0736 Sv2	Sv2a	Q9JIS5	1.001	Mus musculus (Mouse)	10090	Synaptic vesicle glycoprotein 2A (Synaptic vesicle protein 2) (Synaptic vesicle protein 2A) (Calcium regulator SV2A)	false	reviewed	1_4
553	Cytoskeleton	0.88	1	Dctn1	Dctn1	O08788	1.023	Mus musculus (Mouse)	10090	Dynactin subunit 1 (150 kDa dynein-associated polypeptide) (DAP-150) (DP-150) (p150-glued)	false	reviewed	1_7
170	Cytoskeleton	0.98	1	Map6 Mtap6	Map6	Q7TSJ2	0.989	Mus musculus (Mouse)	10090	Microtubule-associated protein 6 (MAP-6) (Stable tubule-only polypeptide) (STOP)	false	reviewed	1_3
554	Cytoskeleton	1.014	1	Dctn2	Dctn2	Q99KJ8	0.953	Mus musculus (Mouse)	10090	Dynactin subunit 2 (50 kDa dynein-associated polypeptide) (Dynactin complex 50 kDa subunit) (DCTN-50) (Growth cone membrane protein 23-48K) (GMP23-48K) (p50 dynamitin)	false	reviewed	1_7
173	Cytoskeleton	0.962	1	Nefm Nef3 Nfm	Nefm	P08553	0.805	Mus musculus (Mouse)	10090	Neurofilament medium polypeptide (NF-M) (160 kDa neurofilament protein) (Neurofilament 3) (Neurofilament triplet M protein)	false	reviewed	1_4
302	Cytoskeleton	1.062	1	Sptbn1 Elf Spnb-2 Spnb2 Sptb2	Sptbn1	Q62261	0.997	Mus musculus (Mouse)	10090	Spectrin beta chain, non-erythrocytic 1 (Beta-II spectrin) (Embryonic liver fodrin) (Fodrin beta chain)	false	reviewed	1_2
175	Cytoskeleton	0.994	1	Nefl Nf68 Nfl	Nefl	P08551	0.743	Mus musculus (Mouse)	10090	Neurofilament light polypeptide (NF-L) (68 kDa neurofilament protein) (Neurofilament triplet L protein)	false	reviewed	1_4
304	Signaling Cascade	1.082	1	Ppp2r5c	Ppp2r5c	Q60996	0.969	Mus musculus (Mouse)	10090	Serine/threonine-protein phosphatase 2A 56 kDa regulatory subunit gamma isoform (PP2A B subunit isoform B'-alpha-3) (PP2A B subunit isoform B'-gamma) (PP2A B subunit isoform B56-gamma) (PP2A B subunit isoform PR61-gamma) (PP2A B subunit isoform R5-gamma)	false	reviewed	1_7
178	Plasma Membrane	1.009	1	Cap1 Cap	Cap1	P40124	0.925	Mus musculus (Mouse)	10090	Adenylyl cyclase-associated protein 1 (CAP 1)	false	reviewed	1_8
306	Signaling Cascade	1.006	1	Ctnnd1 Catns Kiaa0384	Ctnnd1	P30999	0.942	Mus musculus (Mouse)	10090	Catenin delta-1 (Cadherin-associated Src substrate) (CAS) (p120 catenin) (p120(ctn)) (p120(cas))	false	reviewed	1_5
562	Plasma Membrane	0.949	1	Cadm1 Igsf4 Necl2 Ra175 Syncam SynCam1 Tslc1	Cadm1	Q8R5M8	0.99	Mus musculus (Mouse)	10090	Cell adhesion molecule 1 (Immunoglobulin superfamily member 4) (IgSF4) (Nectin-like protein 2) (NECL-2) (Spermatogenic immunoglobulin superfamily) (SgIgSF) (Synaptic cell adhesion molecule) (SynCAM) (Tumor suppressor in lung cancer 1) (TSLC-1)	false	reviewed	1_9
179	Cytoskeleton	0.831	1	Cfl1	Cfl1	P18760	0.835	Mus musculus (Mouse)	10090	Cofilin-1 (Cofilin, non-muscle isoform)	false	reviewed	1_8
307	Signaling Cascade	0.986	1	Git1	Git1	Q68FF6	1.06	Mus musculus (Mouse)	10090	ARF GTPase-activating protein GIT1 (ARF GAP GIT1) (G protein-coupled receptor kinase-interactor 1) (GRK-interacting protein 1)	false	reviewed	1_4
563	Cytoskeleton	0.997	1	Epb41l3 Dal1 Epb4.1l3 Kiaa0987	Epb41l3	Q9WV92	0.982	Mus musculus (Mouse)	10090	Band 4.1-like protein 3 (4.1B) (Differentially expressed in adenocarcinoma of the lung protein 1) (DAL-1) (DAL1P) (mDAL-1) [Cleaved into: Band 4.1-like protein 3, N-terminally processed]	false	reviewed	1_9
565	Plasma Membrane	1.0	1	App	App	P12023	1.0	Mus musculus (Mouse)	10090	Amyloid beta A4 protein (ABPP) (APP) (Alzheimer disease amyloid A4 protein homolog) (Amyloidogenic glycoprotein) (AG) [Cleaved into: N-APP; Soluble APP-alpha (S-APP-alpha); Soluble APP-beta (S-APP-beta); C99 (APP-C99); Beta-amyloid protein 42 (Beta-APP42); Beta-amyloid protein 40 (Beta-APP40); C83; P3(42); P3(40); C80; Gamma-secretase C-terminal fragment 59 (APP-C59) (Amyloid intracellular domain…	false	reviewed	1_2
447	Signaling Cascade	1.035	1	Prkce Pkce Pkcea	Prkce	P16054	1.03	Mus musculus (Mouse)	10090	Protein kinase C epsilon type (EC 2.7.11.13) (nPKC-epsilon)	false	reviewed	1_5
448	Cytoskeleton	0.956	1	Pfn1	Pfn1	P62962	0.945	Mus musculus (Mouse)	10090	Profilin-1 (Profilin I)	false	reviewed	1_8
323	Cytoskeleton	0.92	1	Tubb5	Tubb5	P99024	1.067	Mus musculus (Mouse)	10090	Tubulin beta-5 chain	false	reviewed	1_3
453	Cytoskeleton	1.048	1	Capza2 Cappa2	Capza2	P47754	1.025	Mus musculus (Mouse)	10090	F-actin-capping protein subunit alpha-2 (CapZ alpha-2)	false	reviewed	1_5
455	Cytoskeleton	1.031	1	Actr3 Arp3	Actr3	Q99JY9	0.954	Mus musculus (Mouse)	10090	Actin-related protein 3 (Actin-like protein 3)	false	reviewed	1_8
583	Cytoskeleton	1.034	1	Mapre3	Mapre3	Q6PER3	1.014	Mus musculus (Mouse)	10090	Microtubule-associated protein RP/EB family member 3 (EB1 protein family member 3) (EBF3) (End-binding protein 3) (EB3) (RP3)	false	reviewed	1_7
330	Cytoskeleton	0.946	1	Rhob Arhb	Rhob	P62746	0.96	Mus musculus (Mouse)	10090	Rho-related GTP-binding protein RhoB	false	reviewed	1_6
75	Cytoskeleton	1.008	1	Wdr1	Wdr1	O88342	0.967	Mus musculus (Mouse)	10090	WD repeat-containing protein 1 (Actin-interacting protein 1) (AIP1)	false	reviewed	1_8
205	Signaling Cascade	0.999	2	Pacsin1 Pacsin	Pacsin1	Q61644	0.939	Mus musculus (Mouse)	10090	Protein kinase C and casein kinase substrate in neurons protein 1 (Syndapin-1)	false	reviewed	2_2
461	Signaling Cascade	0.996	1	Crk Crko	Crk	Q64010	0.986	Mus musculus (Mouse)	10090	Adapter molecule crk (Proto-oncogene c-Crk) (p38)	false	reviewed	1_4
79	Cytoskeleton	0.806	1	Tpm1 Tpm-1 Tpma	Tpm1	P58771	0.867	Mus musculus (Mouse)	10090	Tropomyosin alpha-1 chain (Alpha-tropomyosin) (Tropomyosin-1)	false	reviewed	1_5
82	Cytoplasm	1.009	1	Cryab Crya2	Cryab	P23927	0.918	Mus musculus (Mouse)	10090	Alpha-crystallin B chain (Alpha(B)-crystallin) (P23)	false	reviewed	1_5
341	Cytoskeleton	1.005	1	Actr2 Arp2	Actr2	P61161	0.993	Mus musculus (Mouse)	10090	Actin-related protein 2 (Actin-like protein 2)	false	reviewed	1_8
469	Cytoskeleton	0.967	1	Arpc5l	Arpc5l	Q9D898	0.944	Mus musculus (Mouse)	10090	Actin-related protein 2/3 complex subunit 5-like protein (Arp2/3 complex 16 kDa subunit 2) (ARC16-2)	false	reviewed	1_8
601	Signaling Cascade	1.079	1	Map2k1 Mek1 Prkmk1	Map2k1	P31938	0.95	Mus musculus (Mouse)	10090	Dual specificity mitogen-activated protein kinase kinase 1 (MAP kinase kinase 1) (MAPKK 1) (EC 2.7.12.2) (ERK activator kinase 1) (MAPK/ERK kinase 1) (MEK 1)	false	reviewed	1_1
90	Signaling Cascade	1.095	1	Srgap3 Arhgap14 Kiaa0411 Srgap2	Srgap3	Q812A2	1.043	Mus musculus (Mouse)	10090	SLIT-ROBO Rho GTPase-activating protein 3 (srGAP3) (Rho GTPase-activating protein 14) (WAVE-associated Rac GTPase-activating protein) (WRP)	false	reviewed	1_4
476	Plasma Membrane	1.012	1	Ptpra Lrp Ptpa	Ptpra	P18052	1.072	Mus musculus (Mouse)	10090	Receptor-type tyrosine-protein phosphatase alpha (Protein-tyrosine phosphatase alpha) (R-PTP-alpha) (EC 3.1.3.48) (LCA-related phosphatase) (PTPTY-28)	false	reviewed	1_5
351	Cytoskeleton	0.905	1	Dbn1 Drba	Dbn1	Q9QXS6	1.005	Mus musculus (Mouse)	10090	Drebrin (Developmentally-regulated brain protein)	false	reviewed	1_4
96	Cytoskeleton	1.009	1	Coro1a Coro1	Coro1a	O89053	1.018	Mus musculus (Mouse)	10090	Coronin-1A (Coronin-like protein A) (Clipin-A) (Coronin-like protein p57) (Tryptophan aspartate-containing coat protein) (TACO)	false	reviewed	1_5
225	Cytoskeleton	0.916	1	Map4 Mtap4	Map4	P27546	0.962	Mus musculus (Mouse)	10090	Microtubule-associated protein 4 (MAP-4)	false	reviewed	1_3
482	Cytoskeleton	0.915	1	Pfn2	Pfn2	Q9JJV2	0.913	Mus musculus (Mouse)	10090	Profilin-2 (Profilin II)	false	reviewed	1_4
356	Cytoskeleton	0.832	1	Mapt Mtapt Tau	Mapt	P10637	0.823	Mus musculus (Mouse)	10090	Microtubule-associated protein tau (Neurofibrillary tangle protein) (Paired helical filament-tau) (PHF-tau)	false	reviewed	1_2
358	Cytoskeleton	0.962	1	Tuba4a Tuba4	Tuba4a	P68368	1.03	Mus musculus (Mouse)	10090	Tubulin alpha-4A chain (Alpha-tubulin 4) (Alpha-tubulin isotype M-alpha-4) (Tubulin alpha-4 chain)	false	reviewed	1_10
232	Cytoskeleton	0.983	1	Nefh Kiaa0845 Nfh	Nefh	P19246	0.856	Mus musculus (Mouse)	10090	Neurofilament heavy polypeptide (NF-H) (200 kDa neurofilament protein) (Neurofilament triplet H protein)	false	reviewed	1_4
488	Cytoskeleton	1.029	1	Dync1h1 Dhc1 Dnch1 Dnchc1 Dyhc	Dync1h1	Q9JHU4	1.005	Mus musculus (Mouse)	10090	Cytoplasmic dynein 1 heavy chain 1 (Cytoplasmic dynein heavy chain 1) (Dynein heavy chain, cytosolic)	false	reviewed	1_7
489	Cytoskeleton	0.985	1	Ina	Ina	P46660	0.845	Mus musculus (Mouse)	10090	Alpha-internexin (Alpha-Inx) (66 kDa neurofilament protein) (NF-66) (Neurofilament-66)	false	reviewed	1_4
106	Plasma Membrane	0.993	1	Cap2	Cap2	Q9CYT6	0.957	Mus musculus (Mouse)	10090	Adenylyl cyclase-associated protein 2 (CAP 2)	false	reviewed	1_8
362	Cytoskeleton	0.979	1	Myo5a Dilute	Myo5a	Q99104	1.045	Mus musculus (Mouse)	10090	Unconventional myosin-Va (Dilute myosin heavy chain, non-muscle)	false	reviewed	1_4
107	Signaling Cascade	0.878	1	Efhd2 Sws1	Efhd2	Q9D8Y0	0.86	Mus musculus (Mouse)	10090	EF-hand domain-containing protein D2 (Swiprosin-1)	false	reviewed	1_2
492	Plasma Membrane	0.965	1	Rac1	Rac1	P63001	0.951	Mus musculus (Mouse)	10090	Ras-related C3 botulinum toxin substrate 1 (p21-Rac1)	false	reviewed	1_6
32562	Cytoskeleton	0.97	1	Tuba1a Tuba1	Tuba1a	P68369	1.026	Mus musculus (Mouse)	10090	Tubulin alpha-1A chain (Alpha-tubulin 1) (Alpha-tubulin isotype M-alpha-1) (Tubulin alpha-1 chain)	false	reviewed	1_3
