# Supplementary material for: APP Is a Context-Sensitive Regulator of the Hippocampal Presynaptic Active Zone
Source: PLOS journal article supplement (doi:10.1371/journal.pcbi.1004832), 2016-04-19
Supplement: S6 (10.1371/journal.pcbi.1004832.s006) [file journal.pcbi.1004832.s006.cys › CytoscapeSession-2016_01_22-10_07/tables/4095-Synaptic+Vesicle+Cycle+Subnetwork/LOCAL_ATTRS-org.cytoscape.model.CyEdge-Synaptic+Vesicle+Cycle+Subnetwork+default+edge.cytable]

CyCSV-Version	1
SUID	interaction	name	selected
java.lang.Long	java.lang.String	java.lang.String	java.lang.Boolean
Synaptic Vesicle Cycle Subnetwork default edge
1113	pp	P63011 (pp) Q99NE5	false
2135	pp	P63213 (pp) P62874	false
1111	pp	P63011 (pp) P47708	false
2134	pp	P63213 (pp) P18872	false
2087	pp	P50518 (pp) Q8BVE3	false
2086	pp	P50518 (pp) Q9Z1G4	false
2085	pp	P50518 (pp) P63082	false
2084	pp	P50518 (pp) P57746	false
2083	pp	P50518 (pp) Q9WTT4	false
2082	pp	P50518 (pp) Q9Z1G3	false
2081	pp	P50518 (pp) P50516	false
2079	pp	Q8BVE3 (pp) Q9Z1G4	false
1055	pp	P84091 (pp) P17426	false
2078	pp	Q8BVE3 (pp) P63082	false
1054	pp	P84091 (pp) P50516	false
2077	pp	Q8BVE3 (pp) P50516	false
1053	pp	P84091 (pp) Q68FD5	false
1052	pp	P84091 (pp) O08585	false
1050	pp	P84091 (pp) P62743	false
1049	pp	P84091 (pp) Q6IRU5	false
1048	pp	P84091 (pp) Q9DBG3	false
2575	pp	P05064 (pp) Q9WUA3	false
2574	pp	P05064 (pp) P17182	false
2572	pp	P05064 (pp) P05063	false
1030	pp	Q9DBJ1 (pp) P09411	false
1029	pp	Q9DBJ1 (pp) P06745	false
2565	pp	P12023 (pp) P46460	false
2052	pp	Q68FD5 (pp) P62743	false
2051	pp	Q68FD5 (pp) O08585	false
1027	pp	Q9DBJ1 (pp) P17751	false
1026	pp	Q9DBJ1 (pp) P17182	false
2562	pp	P12023 (pp) P63044	false
1025	pp	Q9DBJ1 (pp) P52480	false
2048	pp	Q68FD5 (pp) Q80TZ3	false
2047	pp	Q68FD5 (pp) O35643	false
2558	pp	P12023 (pp) P63011	false
2557	pp	P12023 (pp) O35526	false
2044	pp	Q68FD5 (pp) Q6IRU5	false
2040	pp	Q68FD5 (pp) P17426	false
2552	pp	P12023 (pp) Q62277	false
2551	pp	P12023 (pp) Q9Z1G3	false
2539	pp	P12023 (pp) O88737	false
2537	pp	P12023 (pp) Q9JIS5	false
2533	pp	P12023 (pp) O08599	false
3045	pp	Q9D1K2 (pp) Q9Z1G4	false
2532	pp	P12023 (pp) P39053	false
3044	pp	Q9D1K2 (pp) P62814	false
3043	pp	Q9D1K2 (pp) P63082	false
3041	pp	Q9D1K2 (pp) Q9Z1G3	false
2528	pp	P12023 (pp) P46096	false
3040	pp	Q9D1K2 (pp) Q9WTT4	false
3038	pp	Q9D1K2 (pp) P51863	false
3036	pp	Q9D1K2 (pp) P50516	false
2521	pp	P12023 (pp) P60879	false
3033	pp	Q9D1K2 (pp) Q8BVE3	false
2520	pp	P12023 (pp) O55042	false
3032	pp	Q9D1K2 (pp) P57746	false
3031	pp	Q9D1K2 (pp) P50518	false
3030	pp	Q9Z1G4 (pp) P50516	false
2517	pp	P12023 (pp) P01831	false
3029	pp	Q9Z1G4 (pp) Q9WTT4	false
2516	pp	P12023 (pp) Q68FD5	false
3028	pp	Q9Z1G4 (pp) P63082	false
2515	pp	P12023 (pp) Q9Z1G4	false
3027	pp	Q9Z1G4 (pp) Q62277	false
2511	pp	P12023 (pp) P63017	false
2510	pp	P12023 (pp) P61264	false
2509	pp	P62814 (pp) P51863	false
2508	pp	P62814 (pp) P50516	false
2507	pp	P62814 (pp) Q8BVE3	false
2506	pp	P62814 (pp) P57746	false
2504	pp	P62814 (pp) Q9Z1G3	false
2503	pp	P62814 (pp) P63082	false
1990	pp	P60879 (pp) P51863	false
1989	pp	P60879 (pp) P63044	false
2501	pp	P62814 (pp) P50518	false
1988	pp	P60879 (pp) P47708	false
1476	pp	P52480 (pp) P17182	false
2500	pp	P62814 (pp) Q9WTT4	false
1987	pp	P60879 (pp) Q62442	false
2499	pp	P62814 (pp) Q9Z1G4	false
1986	pp	P60879 (pp) P17426	false
1474	pp	P52480 (pp) P47857	false
1985	pp	P60879 (pp) P46096	false
1473	pp	P52480 (pp) Q9WUA3	false
1983	pp	P60879 (pp) P16858	false
2495	pp	O35526 (pp) Q62442	false
1471	pp	P52480 (pp) P05063	false
1470	pp	P52480 (pp) P09411	false
2493	pp	O35526 (pp) P60879	false
1980	pp	P60879 (pp) O08599	false
2492	pp	O35526 (pp) O08599	false
1468	pp	P52480 (pp) P06151	false
1979	pp	P60879 (pp) P61264	false
1977	pp	P60879 (pp) Q8K400	false
1465	pp	P52480 (pp) P05064	false
1976	pp	P60879 (pp) O55042	false
1464	pp	P52480 (pp) P06745	false
1975	pp	P60879 (pp) P63017	false
1462	pp	Q9DB05 (pp) P46460	false
2473	pp	Q62442 (pp) P61264	false
1439	pp	P06745 (pp) P05064	false
1438	pp	P06745 (pp) Q9WUA3	false
925	pp	O55042 (pp) O35526	false
1435	pp	P06745 (pp) P47857	false
1433	pp	P06745 (pp) P17182	false
1430	pp	P06745 (pp) P06151	false
1429	pp	P06745 (pp) P16858	false
1428	pp	P06745 (pp) P09411	false
1427	pp	P06745 (pp) P05063	false
1422	pp	P61264 (pp) P63044	false
903	pp	P28663 (pp) P46460	false
2942	pp	P46460 (pp) Q9CWZ7	false
2941	pp	P46460 (pp) Q62442	false
2940	pp	P46460 (pp) O08599	false
2939	pp	P46460 (pp) O35526	false
1912	pp	P18872 (pp) P06151	false
1911	pp	P18872 (pp) P62874	false
1910	pp	P18872 (pp) P12023	false
2919	pp	P17427 (pp) P17426	false
2918	pp	P17427 (pp) Q68FD5	false
2917	pp	P17427 (pp) O08585	false
2915	pp	P17427 (pp) P62743	false
2914	pp	P17427 (pp) P39053	false
866	pp	P62743 (pp) O08585	false
2912	pp	P17427 (pp) Q6IRU5	false
2911	pp	P17427 (pp) P84091	false
2910	pp	P17427 (pp) Q9DBG3	false
2909	pp	P17426 (pp) P62743	false
2908	pp	P17426 (pp) O08585	false
2905	pp	P57746 (pp) P50516	false
2904	pp	P57746 (pp) Q8BVE3	false
2903	pp	P57746 (pp) Q9Z1G4	false
2900	pp	P57746 (pp) Q9Z1G3	false
852	pp	O08599 (pp) P61264	false
2899	pp	P57746 (pp) Q9WTT4	false
2897	pp	P57746 (pp) P63082	false
2890	pp	P50516 (pp) P39053	false
840	pp	O35643 (pp) Q80TZ3	false
839	pp	O35643 (pp) O08585	false
2885	pp	P50516 (pp) P46460	false
2882	pp	P50516 (pp) P01831	false
2876	pp	P50516 (pp) O35643	false
1852	pp	P63044 (pp) O55042	false
1851	pp	P63044 (pp) P28663	false
2873	pp	P50516 (pp) P63082	false
1849	pp	P63044 (pp) P39053	false
1847	pp	P63044 (pp) P62874	false
1846	pp	P63044 (pp) O35526	false
2869	pp	P50516 (pp) P17427	false
1844	pp	P63044 (pp) P18872	false
1843	pp	P63044 (pp) P51863	false
2865	pp	P50516 (pp) P17426	false
1313	pp	Q9WTT4 (pp) P50516	false
2849	pp	P17751 (pp) P06745	false
1312	pp	Q9WTT4 (pp) P63082	false
2848	pp	P17751 (pp) P05063	false
2847	pp	P17751 (pp) P17182	false
2845	pp	P17751 (pp) P09411	false
2836	pp	P17751 (pp) P47857	false
2835	pp	P17751 (pp) P16858	false
781	pp	Q80TZ3 (pp) O08585	false
780	pp	Q80TZ3 (pp) P50516	false
2828	pp	P17751 (pp) P05064	false
2826	pp	P17751 (pp) Q9WUA3	false
2823	pp	P17751 (pp) P52480	false
2822	pp	P17751 (pp) P06151	false
1283	pp	O88737 (pp) Q6PH08	false
1282	pp	O88737 (pp) Q99NE5	false
2818	pp	P09411 (pp) P17182	false
1280	pp	Q6PH08 (pp) Q99NE5	false
2816	pp	P09411 (pp) P16858	false
2815	pp	P09411 (pp) P06151	false
1278	pp	P39053 (pp) Q68FD5	false
1277	pp	P39053 (pp) P17426	false
762	pp	Q99NE5 (pp) Q9EQZ6	false
732	pp	Q03157 (pp) P12023	false
722	pp	Q9CQW1 (pp) P46460	false
1227	pp	P05063 (pp) Q9WUA3	false
1224	pp	P05063 (pp) P17182	false
3780	pp	Q06335 (pp) P12023	false
3778	pp	Q06335 (pp) Q03157	false
1214	pp	P17182 (pp) Q9WUA3	false
697	pp	Q9QYX7 (pp) Q9EQZ6	false
693	pp	O54774 (pp) Q68FD5	false
1171	pp	P47857 (pp) P05064	false
1170	pp	P47857 (pp) P05063	false
3727	pp	P51863 (pp) Q9Z1G3	false
1679	pp	P63017 (pp) P63037	false
3726	pp	P51863 (pp) P63082	false
3725	pp	P51863 (pp) Q8BVE3	false
3724	pp	P51863 (pp) P50516	false
3723	pp	P51863 (pp) P57746	false
3722	pp	P51863 (pp) Q9Z1G4	false
1161	pp	Q9DBG3 (pp) Q6IRU5	false
3720	pp	P51863 (pp) P50518	false
1672	pp	P63017 (pp) Q9QYJ0	false
1160	pp	Q9DBG3 (pp) O08585	false
2183	pp	Q62277 (pp) P60879	false
3719	pp	P51863 (pp) Q9WTT4	false
1158	pp	Q9DBG3 (pp) Q68FD5	false
2181	pp	Q62277 (pp) P46096	false
3717	pp	Q9Z1G3 (pp) Q9WTT4	false
1157	pp	Q9DBG3 (pp) P17426	false
2180	pp	Q62277 (pp) P63044	false
3716	pp	Q9Z1G3 (pp) Q9Z1G4	false
2179	pp	Q62277 (pp) P01831	false
3715	pp	Q9Z1G3 (pp) P50516	false
1155	pp	Q9DBG3 (pp) P62743	false
1154	pp	Q9DBG3 (pp) P60879	false
3713	pp	Q9Z1G3 (pp) Q8BVE3	false
3712	pp	Q9Z1G3 (pp) P63082	false
1152	pp	Q6IRU5 (pp) P62743	false
1151	pp	Q6IRU5 (pp) P17426	false
1148	pp	P17183 (pp) P05064	false
1147	pp	P17183 (pp) Q9DBJ1	false
1146	pp	P17183 (pp) P05063	false
1145	pp	P17183 (pp) P17751	false
1143	pp	P17183 (pp) P09411	false
1142	pp	P17183 (pp) P52480	false
1139	pp	P17183 (pp) P06745	false
