# Supplementary material for: APP Is a Context-Sensitive Regulator of the Hippocampal Presynaptic Active Zone
Source: PLOS journal article supplement (doi:10.1371/journal.pcbi.1004832), 2016-04-19
Supplement: S6 (10.1371/journal.pcbi.1004832.s006) [file journal.pcbi.1004832.s006.cys › CytoscapeSession-2016_01_22-10_07/tables/4095-Synaptic+Vesicle+Cycle+Subnetwork/LOCAL_ATTRS-org.cytoscape.model.CyNode-Synaptic+Vesicle+Cycle+Subnetwork+default+node.cytable]

CyCSV-Version	1
SUID	1_Localization	APP-KO/wt	Community	Gene names	Gene names (primary )	name	NexCre/wt	Organism	Organism ID	Protein names	selected	Status	Subcommunities
java.lang.Long	java.lang.String	java.lang.Double	java.lang.Integer	java.lang.String	java.lang.String	java.lang.String	java.lang.Double	java.lang.String	java.lang.Integer	java.lang.String	java.lang.Boolean	java.lang.String	java.lang.String
	mutable	mutable	mutable	mutable	mutable		mutable	mutable	mutable	mutable		mutable	mutable
Synaptic Vesicle Cycle Subnetwork default node
500	Signaling Cascade	0.937	1	Gnao1 Gna0 Gnao	Gnao1	P18872	1.022	Mus musculus (Mouse)	10090	Guanine nucleotide-binding protein G(o) subunit alpha	false	reviewed	1_3
375	Synaptic Vesicle	1.026	4	Eno1 Eno-1	Eno1	P17182	0.973	Mus musculus (Mouse)	10090	Alpha-enolase (EC 4.2.1.11) (2-phospho-D-glycerate hydro-lyase) (Enolase 1) (Non-neural enolase) (NNE)	false	reviewed	4_2
120	Synaptic Vesicle	1.026	1	Ykt6	Ykt6	Q9CQW1	0.964	Mus musculus (Mouse)	10090	Synaptobrevin homolog YKT6 (EC 2.3.1.-)	false	reviewed	1_10
378	Synaptic Vesicle	1.069	4	Aldoc Aldo3 Scrg2	Aldoc	P05063	1.068	Mus musculus (Mouse)	10090	Fructose-bisphosphate aldolase C (EC 4.1.2.13) (Aldolase 3) (Brain-type aldolase) (Scrapie-responsive protein 2) (Zebrin II)	false	reviewed	4_2
380	Cytoplasm	0.974	4	Pfkp Pfkc	Pfkp	Q9WUA3	1.016	Mus musculus (Mouse)	10090	ATP-dependent 6-phosphofructokinase, platelet type (ATP-PFK) (PFK-P) (EC 2.7.1.11) (6-phosphofructokinase type C) (Phosphofructo-1-kinase isozyme C) (PFK-C) (Phosphohexokinase)	false	reviewed	4_2
509	Plasma Membrane	0.917	1	Snap25 Snap	Snap25	P60879	0.997	Mus musculus (Mouse)	10090	Synaptosomal-associated protein 25 (SNAP-25) (Super protein) (SUP) (Synaptosomal-associated 25 kDa protein)	false	reviewed	1_3
514	Synaptic Vesicle	1.028	2	Cltc	Cltc	Q68FD5	0.994	Mus musculus (Mouse)	10090	Clathrin heavy chain 1	false	reviewed	2_3
515	Plasma Membrane	1.049	6	Dnaja2	Dnaja2	Q9QYJ0	0.954	Mus musculus (Mouse)	10090	DnaJ homolog subfamily A member 2 (mDj3)	false	reviewed	6_4
260	Plasma Membrane	0.948	1	Napb Snapb	Napb	P28663	0.894	Mus musculus (Mouse)	10090	Beta-soluble NSF attachment protein (SNAP-beta) (Brain protein I47) (N-ethylmaleimide-sensitive factor attachment protein beta)	false	reviewed	1_3
133	Plasma Membrane	1.0	1	Aplp1	Aplp1	Q03157	1.0	Mus musculus (Mouse)	10090	Amyloid-like protein 1 (APLP) (APLP-1) [Cleaved into: C30]	false	reviewed	1_2
520	Synaptic Vesicle	0.999	2	Atp6v1h	Atp6v1h	Q8BVE3	0.899	Mus musculus (Mouse)	10090	V-type proton ATPase subunit H (V-ATPase subunit H) (Vacuolar proton pump subunit H)	false	reviewed	2_4
393	Synaptic Vesicle	1.066	2	Dnm1 Dnm Kiaa4093	Dnm1	P39053	0.98	Mus musculus (Mouse)	10090	Dynamin-1 (EC 3.6.5.5)	false	reviewed	2_2
521	Synaptic Vesicle	0.956	2	Atp6v1e1 Atp6e Atp6e2	Atp6v1e1	P50518	0.897	Mus musculus (Mouse)	10090	V-type proton ATPase subunit E 1 (V-ATPase subunit E 1) (V-ATPase 31 kDa subunit) (p31) (Vacuolar proton pump subunit E 1)	false	reviewed	2_4
394	Plasma Membrane	0.859	1	Erc2 Cast1 D14Ertd171e Kiaa0378	Erc2	Q6PH08	1.053	Mus musculus (Mouse)	10090	ERC protein 2 (CAZ-associated structural protein 1) (CAST1)	false	reviewed	1_12
395	Cytoskeleton	0.924	1	Bsn Kiaa0434	Bsn	O88737	1.057	Mus musculus (Mouse)	10090	Protein bassoon	false	reviewed	1_12
652	Cytoplasm	1.083	4	Ldha Ldh-1 Ldh1	Ldha	P06151	0.876	Mus musculus (Mouse)	10090	L-lactate dehydrogenase A chain (LDH-A) (EC 1.1.1.27) (LDH muscle subunit) (LDH-M)	false	reviewed	4_3
271	Plasma Membrane	0.935	2	Thy1 Thy-1	Thy1	P01831	0.914	Mus musculus (Mouse)	10090	Thy-1 membrane glycoprotein (Thy-1 antigen) (CD antigen CD90)	false	reviewed	2_6
401	Synaptic Vesicle	0.945	2	Atp6v1g2 Atp6g2 Ng38	Atp6v1g2	Q9WTT4	0.919	Mus musculus (Mouse)	10090	V-type proton ATPase subunit G 2 (V-ATPase subunit G 2) (V-ATPase 13 kDa subunit 2) (Vacuolar proton pump subunit G 2)	false	reviewed	2_4
529	Signaling Cascade	1.027	1	Gnb1	Gnb1	P62874	0.87	Mus musculus (Mouse)	10090	Guanine nucleotide-binding protein G(I)/G(S)/G(T) subunit beta-1 (Transducin beta chain 1)	false	reviewed	1_3
274	Synaptic Vesicle	0.836	1	Snca Syn	Snca	O55042	0.528	Mus musculus (Mouse)	10090	Alpha-synuclein (Non-A beta component of AD amyloid) (Non-A4 component of amyloid precursor) (NACP)	false	reviewed	1_3
530	Signaling Cascade	0.37	1	Gng2	Gng2	P63213	0.536	Mus musculus (Mouse)	10090	Guanine nucleotide-binding protein G(I)/G(S)/G(O) subunit gamma-2 (G gamma-I)	false	reviewed	1_3
536	Synaptic Vesicle	1.247	2	Syp	Syp	Q62277	0.923	Mus musculus (Mouse)	10090	Synaptophysin (BM89 antigen) (Major synaptic vesicle protein p38)	false	reviewed	2_6
154	Synaptic Vesicle	0.919	1	Rims1 Kiaa0340 Rab3ip1 Rim1	Rims1	Q99NE5	0.996	Mus musculus (Mouse)	10090	Regulating synaptic membrane exocytosis protein 1 (Rab-3-interacting molecule 1) (RIM 1) (Rab-3-interacting protein 1)	false	reviewed	1_12
666	Synaptic Vesicle	1.033	2	Atp6v1c1 Atp6c Atp6c1 Vatc	Atp6v1c1	Q9Z1G3	0.896	Mus musculus (Mouse)	10090	V-type proton ATPase subunit C 1 (V-ATPase subunit C 1) (Vacuolar proton pump subunit C 1)	false	reviewed	2_4
283	Synaptic Vesicle	0.699	2	Clta	Clta	O08585	0.893	Mus musculus (Mouse)	10090	Clathrin light chain A (Lca)	false	reviewed	2_3
667	Synaptic Vesicle	0.629	2	Atp6v0d1 Atp6d	Atp6v0d1	P51863	0.813	Mus musculus (Mouse)	10090	V-type proton ATPase subunit d 1 (V-ATPase subunit d 1) (P39) (Physophilin) (V-ATPase 40 kDa accessory protein) (V-ATPase AC39 subunit) (Vacuolar proton pump subunit d 1)	false	reviewed	2_4
672	Plasma Membrane	1.0	1	Aplp2	Aplp2	Q06335	1.0	Mus musculus (Mouse)	10090	Amyloid-like protein 2 (APLP-2) (CDEI box-binding protein) (CDEBP)	false	reviewed	1_2
165	Synaptic Vesicle	1.117	2	Dnajc6 Kiaa0473	Dnajc6	Q80TZ3	0.987	Mus musculus (Mouse)	10090	Putative tyrosine-protein phosphatase auxilin (EC 3.1.3.48) (DnaJ homolog subfamily C member 6)	false	reviewed	2_3
423	Plasma Membrane	0.865	1	Stx1b Stx1b1 Stx1b2	Stx1b	P61264	0.987	Mus musculus (Mouse)	10090	Syntaxin-1B	false	reviewed	1_3
297	Synaptic Vesicle	0.997	1	Sv2a Kiaa0736 Sv2	Sv2a	Q9JIS5	1.001	Mus musculus (Mouse)	10090	Synaptic vesicle glycoprotein 2A (Synaptic vesicle protein 2) (Synaptic vesicle protein 2A) (Calcium regulator SV2A)	false	reviewed	1_4
426	Synaptic Vesicle	1.035	4	Gpi Gpi1	Gpi	P06745	0.923	Mus musculus (Mouse)	10090	Glucose-6-phosphate isomerase (GPI) (EC 5.3.1.9) (Autocrine motility factor) (AMF) (Neuroleukin) (NLK) (Phosphoglucose isomerase) (PGI) (Phosphohexose isomerase) (PHI)	false	reviewed	4_2
557	Synaptic Vesicle	0.929	1	Vamp1 Syb1	Vamp1	Q62442	0.924	Mus musculus (Mouse)	10090	Vesicle-associated membrane protein 1 (VAMP-1) (Synaptobrevin-1)	false	reviewed	1_3
561	Plasma Membrane	0.907	1	Stx1a	Stx1a	O35526	1.043	Mus musculus (Mouse)	10090	Syntaxin-1A (Neuron-specific antigen HPC-1)	false	reviewed	1_3
434	Plasma Membrane	1.008	1	Napa Snapa	Napa	Q9DB05	0.905	Mus musculus (Mouse)	10090	Alpha-soluble NSF attachment protein (SNAP-alpha) (N-ethylmaleimide-sensitive factor attachment protein alpha)	false	reviewed	1_3
435	Synaptic Vesicle	0.997	4	Pkm Pk3 Pkm2 Pykm	Pkm	P52480	0.928	Mus musculus (Mouse)	10090	Pyruvate kinase PKM (EC 2.7.1.40) (Pyruvate kinase muscle isozyme)	false	reviewed	4_2
564	Synaptic Vesicle	1.06	2	Atp6v1b2 Atp6b2 Vat2	Atp6v1b2	P62814	0.95	Mus musculus (Mouse)	10090	V-type proton ATPase subunit B, brain isoform (V-ATPase subunit B 2) (Endomembrane proton pump 58 kDa subunit) (Vacuolar proton pump subunit B 2)	false	reviewed	2_4
309	Synaptic Vesicle	0.936	4	Pgam1	Pgam1	Q9DBJ1	0.878	Mus musculus (Mouse)	10090	Phosphoglycerate mutase 1 (EC 3.1.3.13) (EC 5.4.2.11) (EC 5.4.2.4) (BPG-dependent PGAM 1) (Phosphoglycerate mutase isozyme B) (PGAM-B)	false	reviewed	4_2
565	Plasma Membrane	1.0	1	App	App	P12023	1.0	Mus musculus (Mouse)	10090	Amyloid beta A4 protein (ABPP) (APP) (Alzheimer disease amyloid A4 protein homolog) (Amyloidogenic glycoprotein) (AG) [Cleaved into: N-APP; Soluble APP-alpha (S-APP-alpha); Soluble APP-beta (S-APP-beta); C99 (APP-C99); Beta-amyloid protein 42 (Beta-APP42); Beta-amyloid protein 40 (Beta-APP40); C83; P3(42); P3(40); C80; Gamma-secretase C-terminal fragment 59 (APP-C59) (Amyloid intracellular domain…	false	reviewed	1_2
569	Synaptic Vesicle	1.053	4	Aldoa Aldo1	Aldoa	P05064	0.875	Mus musculus (Mouse)	10090	Fructose-bisphosphate aldolase A (EC 4.1.2.13) (Aldolase 1) (Muscle-type aldolase)	false	reviewed	4_2
442	Synaptic Vesicle	1.104	2	Atp6v0c Atp6c Atp6l Atpl Mvp	Atp6v0c	P63082	0.683	Mus musculus (Mouse)	10090	V-type proton ATPase 16 kDa proteolipid subunit (V-ATPase 16 kDa proteolipid subunit) (PL16) (Vacuolar proton pump 16 kDa proteolipid subunit)	false	reviewed	2_4
321	Synaptic Vesicle	1.032	2	Ap2m1 Clapm1	Ap2m1	P84091	1.0	Mus musculus (Mouse)	10090	AP-2 complex subunit mu (AP-2 mu chain) (Adaptor protein complex AP-2 subunit mu) (Adaptor-related protein complex 2 subunit mu) (Clathrin assembly protein complex 2 mu medium chain) (Clathrin coat assembly protein AP50) (Clathrin coat-associated protein AP50) (Mu2-adaptin) (Plasma membrane adaptor AP-2 50 kDa protein)	false	reviewed	2_3
197	Plasma Membrane	0.966	1	Napg Snapg	Napg	Q9CWZ7	0.921	Mus musculus (Mouse)	10090	Gamma-soluble NSF attachment protein (SNAP-gamma) (N-ethylmaleimide-sensitive factor attachment protein gamma)	false	reviewed	1_3
200	Synaptic Vesicle	0.936	1	Syt1	Syt1	P46096	1.078	Mus musculus (Mouse)	10090	Synaptotagmin-1 (Synaptotagmin I) (SytI) (p65)	false	reviewed	1_3
331	Cytoplasm	0.986	4	Gapdh Gapd	Gapdh	P16858	0.965	Mus musculus (Mouse)	10090	Glyceraldehyde-3-phosphate dehydrogenase (GAPDH) (EC 1.2.1.12) (Peptidyl-cysteine S-nitrosylase GAPDH) (EC 2.6.99.-)	false	reviewed	4_2
77	Synaptic Vesicle	1.056	2	Ap3d1 Ap3d	Ap3d1	O54774	1.0	Mus musculus (Mouse)	10090	AP-3 complex subunit delta-1 (AP-3 complex subunit delta) (Adaptor-related protein complex 3 subunit delta-1) (Delta-adaptin) (mBLVR1)	false	reviewed	2_3
592	Synaptic Vesicle	1.03	4	Pgk1 Pgk-1	Pgk1	P09411	0.922	Mus musculus (Mouse)	10090	Phosphoglycerate kinase 1 (EC 2.7.2.3)	false	reviewed	4_2
81	Synaptic Vesicle	0.932	1	Pclo Acz	Pclo	Q9QYX7	1.053	Mus musculus (Mouse)	10090	Protein piccolo (Aczonin) (Brain-derived HLMN protein) (Multidomain presynaptic cytomatrix protein)	false	reviewed	1_12
593	Synaptic Vesicle	0.978	4	Tpi1 Tpi	Tpi1	P17751	0.919	Mus musculus (Mouse)	10090	Triosephosphate isomerase (TIM) (EC 5.3.1.1) (Triose-phosphate isomerase)	false	reviewed	4_2
83	Signaling Cascade	1.064	1	Rapgef4 Cgef2 Epac2	Rapgef4	Q9EQZ6	1.012	Mus musculus (Mouse)	10090	Rap guanine nucleotide exchange factor 4 (Exchange factor directly activated by cAMP 2) (Exchange protein directly activated by cAMP 2) (EPAC 2) (cAMP-dependent Rap1 guanine-nucleotide exchange factor) (cAMP-regulated guanine nucleotide exchange factor II) (cAMP-GEFII)	false	reviewed	1_12
211	Synaptic Vesicle	1.088	2	Ap1b1 Adtb1	Ap1b1	O35643	0.978	Mus musculus (Mouse)	10090	AP-1 complex subunit beta-1 (Adaptor protein complex AP-1 subunit beta-1) (Adaptor-related protein complex 1 subunit beta-1) (Beta-1-adaptin) (Beta-adaptin 1) (Clathrin assembly protein complex 1 beta large chain) (Golgi adaptor HA1/AP1 adaptin beta subunit)	false	reviewed	2_3
597	Synaptic Vesicle	1.044	2	Atp6v1a Atp6a1 Atp6a2 Atp6v1a1	Atp6v1a	P50516	0.941	Mus musculus (Mouse)	10090	V-type proton ATPase catalytic subunit A (V-ATPase subunit A) (EC 3.6.3.14) (V-ATPase 69 kDa subunit) (Vacuolar proton pump subunit alpha)	false	reviewed	2_1
470	Signaling Cascade	0.999	6	Hspa8 Hsc70 Hsc73	Hspa8	P63017	1.005	Mus musculus (Mouse)	10090	Heat shock cognate 71 kDa protein (Heat shock 70 kDa protein 8)	false	reviewed	6_2
598	Synaptic Vesicle	1.038	2	Atp6v1d Atp6m Vatd	Atp6v1d	P57746	0.909	Mus musculus (Mouse)	10090	V-type proton ATPase subunit D (V-ATPase subunit D) (V-ATPase 28 kDa accessory protein) (Vacuolar proton pump subunit D)	false	reviewed	2_4
343	Synaptic Vesicle	0.956	1	Rab3a	Rab3a	P63011	0.989	Mus musculus (Mouse)	10090	Ras-related protein Rab-3A	false	reviewed	1_6
599	Synaptic Vesicle	1.066	2	Ap2a1 Adtaa Clapa1	Ap2a1	P17426	0.961	Mus musculus (Mouse)	10090	AP-2 complex subunit alpha-1 (100 kDa coated vesicle protein A) (Adaptor protein complex AP-2 subunit alpha-1) (Adaptor-related protein complex 2 subunit alpha-1) (Alpha-adaptin A) (Alpha1-adaptin) (Clathrin assembly protein complex 2 alpha-A large chain) (Plasma membrane adaptor HA2/AP2 adaptin alpha A subunit)	false	reviewed	2_3
216	Synaptic Vesicle	1.028	1	Stxbp1	Stxbp1	O08599	0.901	Mus musculus (Mouse)	10090	Syntaxin-binding protein 1 (Protein unc-18 homolog 1) (Unc18-1) (Protein unc-18 homolog A) (Unc-18A)	false	reviewed	1_3
600	Synaptic Vesicle	1.072	2	Ap2a2 Adtab	Ap2a2	P17427	0.967	Mus musculus (Mouse)	10090	AP-2 complex subunit alpha-2 (100 kDa coated vesicle protein C) (Adaptor protein complex AP-2 subunit alpha-2) (Adaptor-related protein complex 2 subunit alpha-2) (Alpha-adaptin C) (Alpha2-adaptin) (Clathrin assembly protein complex 2 alpha-C large chain) (Plasma membrane adaptor HA2/AP2 adaptin alpha C subunit)	false	reviewed	2_3
93	Synaptic Vesicle	0.954	1	Stxbp5 Kiaa4253 Llgl3	Stxbp5	Q8K400	0.989	Mus musculus (Mouse)	10090	Syntaxin-binding protein 5 (Lethal(2) giant larvae protein homolog 3) (Tomosyn-1)	false	reviewed	1_3
607	Synaptic Vesicle	1.028	1	Nsf Skd2	Nsf	P46460	1.081	Mus musculus (Mouse)	10090	Vesicle-fusing ATPase (EC 3.6.4.6) (N-ethylmaleimide-sensitive fusion protein) (NEM-sensitive fusion protein) (Suppressor of K(+) transport growth defect 2) (Protein SKD2) (Vesicular-fusion protein NSF)	false	reviewed	1_3
352	Synaptic Vesicle	1.037	4	Eno2 Eno-2	Eno2	P17183	0.926	Mus musculus (Mouse)	10090	Gamma-enolase (EC 4.2.1.11) (2-phospho-D-glycerate hydro-lyase) (Enolase 2) (Neural enolase) (Neuron-specific enolase) (NSE)	false	reviewed	4_2
353	Synaptic Vesicle	0.804	2	Cltb	Cltb	Q6IRU5	0.81	Mus musculus (Mouse)	10090	Clathrin light chain B (Lcb)	false	reviewed	2_3
354	Synaptic Vesicle	1.096	2	Ap2b1 Clapb1	Ap2b1	Q9DBG3	0.926	Mus musculus (Mouse)	10090	AP-2 complex subunit beta (AP105B) (Adaptor protein complex AP-2 subunit beta) (Adaptor-related protein complex 2 subunit beta) (Beta-2-adaptin) (Beta-adaptin) (Clathrin assembly protein complex 2 beta large chain) (Plasma membrane adaptor HA2/AP2 adaptin beta subunit)	false	reviewed	2_3
611	Cytoplasm	1.067	6	Dnaja1 Dnaj2 Hsj2 Hspf4	Dnaja1	P63037	1.039	Mus musculus (Mouse)	10090	DnaJ homolog subfamily A member 1 (DnaJ protein homolog 2) (Heat shock 40 kDa protein 4) (Heat shock protein J2) (HSJ-2)	false	reviewed	6_2
359	Cytoplasm	0.993	4	Pfkm Pfk-m Pfka	Pfkm	P47857	1.019	Mus musculus (Mouse)	10090	ATP-dependent 6-phosphofructokinase, muscle type (ATP-PFK) (PFK-M) (EC 2.7.1.11) (6-phosphofructokinase type A) (Phosphofructo-1-kinase isozyme A) (PFK-A) (Phosphohexokinase)	false	reviewed	4_2
615	Synaptic Vesicle	1.069	2	Atp6v0a1 Atp6n1	Atp6v0a1	Q9Z1G4	1.027	Mus musculus (Mouse)	10090	V-type proton ATPase 116 kDa subunit a isoform 1 (V-ATPase 116 kDa isoform a1) (Clathrin-coated vesicle/synaptic vesicle proton pump 116 kDa subunit) (Vacuolar adenosine triphosphatase subunit Ac116) (Vacuolar proton pump subunit 1) (Vacuolar proton translocating ATPase 116 kDa subunit a isoform 1)	false	reviewed	2_4
616	Synaptic Vesicle	0.881	2	Atp6v1f Atp6s14 Vatf	Atp6v1f	Q9D1K2	0.954	Mus musculus (Mouse)	10090	V-type proton ATPase subunit F (V-ATPase subunit F) (V-ATPase 14 kDa subunit) (Vacuolar proton pump subunit F)	false	reviewed	2_4
233	Synaptic Vesicle	0.849	2	Ap2s1 Ap17 Claps2	Ap2s1	P62743	0.911	Mus musculus (Mouse)	10090	AP-2 complex subunit sigma (Adaptor protein complex AP-2 subunit sigma) (Adaptor-related protein complex 2 subunit sigma) (Clathrin assembly protein 2 sigma small chain) (Clathrin coat assembly protein AP17) (Clathrin coat-associated protein AP17) (Plasma membrane adaptor AP-2 17 kDa protein) (Sigma-adaptin 3b) (Sigma2-adaptin)	false	reviewed	2_3
490	Synaptic Vesicle	0.944	1	Vamp2 Syb2	Vamp2	P63044	0.853	Mus musculus (Mouse)	10090	Vesicle-associated membrane protein 2 (VAMP-2) (Synaptobrevin-2)	false	reviewed	1_3
236	Synaptic Vesicle	0.926	1	Rph3a	Rph3a	P47708	0.958	Mus musculus (Mouse)	10090	Rabphilin-3A (Exophilin-1)	false	reviewed	1_6
