# Supplementary material for: APP Is a Context-Sensitive Regulator of the Hippocampal Presynaptic Active Zone
Source: PLOS journal article supplement (doi:10.1371/journal.pcbi.1004832), 2016-04-19
Supplement: S6 (10.1371/journal.pcbi.1004832.s006) [file journal.pcbi.1004832.s006.cys › CytoscapeSession-2016_01_22-10_07/tables/4105-Calcium+Homeostasis+Subnetwork/LOCAL_ATTRS-org.cytoscape.model.CyEdge-Calcium+Homeostasis+Subnetwork+default+edge.cytable]

CyCSV-Version	1
SUID	interaction	name	selected
java.lang.Long	java.lang.String	java.lang.String	java.lang.Boolean
Calcium Homeostasis Subnetwork default edge
2521	pp	P12023 (pp) P60879	false
2520	pp	P12023 (pp) O55042	false
2135	pp	P63213 (pp) P62874	false
2519	pp	P12023 (pp) P97300	false
2134	pp	P63213 (pp) P18872	false
2517	pp	P12023 (pp) P01831	false
724	pp	Q6P9K9 (pp) O70589	false
851	pp	O08599 (pp) P16546	false
2512	pp	P12023 (pp) P11627	false
848	pp	P20444 (pp) P26645	false
716	pp	Q63810 (pp) P48453	false
1991	pp	P60879 (pp) P06837	false
1989	pp	P60879 (pp) P63044	false
1988	pp	P60879 (pp) P47708	false
3780	pp	Q06335 (pp) P12023	false
3778	pp	Q06335 (pp) Q03157	false
706	pp	D3YVF0 (pp) P48453	false
1985	pp	P60879 (pp) P46096	false
2496	pp	Q8R5M8 (pp) O70589	false
2493	pp	O35526 (pp) P60879	false
1980	pp	P60879 (pp) O08599	false
2492	pp	O35526 (pp) O08599	false
1852	pp	P63044 (pp) O55042	false
697	pp	Q9QYX7 (pp) Q9EQZ6	false
1976	pp	P60879 (pp) O55042	false
1847	pp	P63044 (pp) P62874	false
1846	pp	P63044 (pp) O35526	false
1844	pp	P63044 (pp) P18872	false
1842	pp	P63044 (pp) P35802	false
1070	pp	P11627 (pp) P13595	false
1067	pp	P13595 (pp) P16546	false
1192	pp	P08226 (pp) P12023	false
807	pp	P26645 (pp) P63318	false
1190	pp	P08226 (pp) P20357	false
1062	pp	O70589 (pp) O08599	false
927	pp	P63328 (pp) Q63810	false
925	pp	O55042 (pp) O35526	false
3227	pp	P68404 (pp) P26645	false
922	pp	P20357 (pp) Q6PHZ2	false
921	pp	P20357 (pp) P11798	false
915	pp	Q3UVX5 (pp) P62204	false
1040	pp	P28652 (pp) Q6PHZ2	false
1035	pp	P62204 (pp) P63328	false
1034	pp	P62204 (pp) O70589	false
773	pp	Q91XV3 (pp) P26645	false
1669	pp	Q9R0K7 (pp) P12023	false
1283	pp	O88737 (pp) Q6PH08	false
771	pp	Q91XV3 (pp) P06837	false
1282	pp	O88737 (pp) Q99NE5	false
2562	pp	P12023 (pp) P63044	false
1280	pp	Q6PH08 (pp) Q99NE5	false
2559	pp	P12023 (pp) P06837	false
1022	pp	P23818 (pp) Q3UVX5	false
765	pp	Q9QY76 (pp) O35526	false
2557	pp	P12023 (pp) O35526	false
762	pp	Q99NE5 (pp) Q9EQZ6	false
1911	pp	P18872 (pp) P62874	false
1910	pp	P18872 (pp) P12023	false
758	pp	P11798 (pp) P28652	false
2545	pp	P12023 (pp) P35564	false
3694	pp	Q8C8R3 (pp) P16546	false
3693	pp	Q8C8R3 (pp) P11627	false
1004	pp	P48453 (pp) P62204	false
1003	pp	P48453 (pp) P63328	false
2539	pp	P12023 (pp) O88737	false
2538	pp	P12023 (pp) P13595	false
2537	pp	P12023 (pp) Q9JIS5	false
997	pp	Q9CS84 (pp) O70589	false
2533	pp	P12023 (pp) O08599	false
2528	pp	P12023 (pp) P46096	false
2525	pp	P12023 (pp) P28652	false
1244	pp	P06837 (pp) P62204	false
732	pp	Q03157 (pp) P12023	false
