# Supplementary material for: APP Is a Context-Sensitive Regulator of the Hippocampal Presynaptic Active Zone
Source: PLOS journal article supplement (doi:10.1371/journal.pcbi.1004832), 2016-04-19
Supplement: S6 (10.1371/journal.pcbi.1004832.s006) [file journal.pcbi.1004832.s006.cys › CytoscapeSession-2016_01_22-10_07/tables/4105-Calcium+Homeostasis+Subnetwork/LOCAL_ATTRS-org.cytoscape.model.CyNetwork-Calcium+Homeostasis+Subnetwork+default+network.cytable]

"CyCSV-Version","1"
"SUID","__Annotations","name","selected"
"java.lang.Long","java.util.List<java.lang.String>","java.lang.String","java.lang.Boolean"
"","mutable","",""
"Calcium Homeostasis Subnetwork default network",""
"4105","","Calcium Homeostasis Subnetwork","false"
