# Supplementary material for: APP Is a Context-Sensitive Regulator of the Hippocampal Presynaptic Active Zone
Source: PLOS journal article supplement (doi:10.1371/journal.pcbi.1004832), 2016-04-19
Supplement: S6 (10.1371/journal.pcbi.1004832.s006) [file journal.pcbi.1004832.s006.cys › CytoscapeSession-2016_01_22-10_07/tables/4105-Calcium+Homeostasis+Subnetwork/LOCAL_ATTRS-org.cytoscape.model.CyNode-Calcium+Homeostasis+Subnetwork+default+node.cytable]

CyCSV-Version	1
SUID	1_Localization	APP-KO/wt	Community	Gene names	Gene names (primary )	name	NexCre/wt	Organism	Organism ID	Protein names	selected	Status	Subcommunities
java.lang.Long	java.lang.String	java.lang.Double	java.lang.Integer	java.lang.String	java.lang.String	java.lang.String	java.lang.Double	java.lang.String	java.lang.Integer	java.lang.String	java.lang.Boolean	java.lang.String	java.lang.String
	mutable	mutable	mutable	mutable	mutable		mutable	mutable	mutable	mutable		mutable	mutable
Calcium Homeostasis Subnetwork default node
111	Signaling Cascade	0.877	1	Ppp3r1 Cnb	Ppp3r1	Q63810	0.893	Mus musculus (Mouse)	10090	Calcineurin subunit B type 1 (Protein phosphatase 2B regulatory subunit 1) (Protein phosphatase 3 regulatory subunit B alpha isoform 1)	false	reviewed	1_11
368	Plasma Membrane	1.055	1	Apoe	Apoe	P08226	0.943	Mus musculus (Mouse)	10090	Apolipoprotein E (Apo-E)	false	reviewed	1_2
500	Signaling Cascade	0.937	1	Gnao1 Gna0 Gnao	Gnao1	P18872	1.022	Mus musculus (Mouse)	10090	Guanine nucleotide-binding protein G(o) subunit alpha	false	reviewed	1_3
630	Signaling Cascade	0.921	1	Prkcb Pkcb Prkcb1	Prkcb	P68404	1.048	Mus musculus (Mouse)	10090	Protein kinase C beta type (PKC-B) (PKC-beta) (EC 2.7.11.13)	false	reviewed	1_1
121	Signaling Cascade	0.978	1	Nrxn3	Nrxn3	Q6P9K9	1.024	Mus musculus (Mouse)	10090	Neurexin-3 (Neurexin III-alpha) (Neurexin-3-alpha)	false	reviewed	1_9
509	Plasma Membrane	0.917	1	Snap25 Snap	Snap25	P60879	0.997	Mus musculus (Mouse)	10090	Synaptosomal-associated protein 25 (SNAP-25) (Super protein) (SUP) (Synaptosomal-associated 25 kDa protein)	false	reviewed	1_3
383	Plasma Membrane	0.79	1	Gap43 Basp2	Gap43	P06837	0.72	Mus musculus (Mouse)	10090	Neuromodulin (Axonal membrane protein GAP-43) (Calmodulin-binding protein P-57) (Growth-associated protein 43)	false	reviewed	1_1
133	Plasma Membrane	1.0	1	Aplp1	Aplp1	Q03157	1.0	Mus musculus (Mouse)	10090	Amyloid-like protein 1 (APLP) (APLP-1) [Cleaved into: C30]	false	reviewed	1_2
394	Plasma Membrane	0.859	1	Erc2 Cast1 D14Ertd171e Kiaa0378	Erc2	Q6PH08	1.053	Mus musculus (Mouse)	10090	ERC protein 2 (CAZ-associated structural protein 1) (CAST1)	false	reviewed	1_12
395	Cytoskeleton	0.924	1	Bsn Kiaa0434	Bsn	O88737	1.057	Mus musculus (Mouse)	10090	Protein bassoon	false	reviewed	1_12
269	Plasma Membrane	1.012	1	Grm5 Gprc1e Mglur5	Grm5	Q3UVX5	1.076	Mus musculus (Mouse)	10090	Metabotropic glutamate receptor 5 (mGluR5)	false	reviewed	1_1
270	Cytoskeleton	0.971	1	Map2 Mtap2	Map2	P20357	0.958	Mus musculus (Mouse)	10090	Microtubule-associated protein 2 (MAP-2)	false	reviewed	1_1
271	Plasma Membrane	0.935	2	Thy1 Thy-1	Thy1	P01831	0.914	Mus musculus (Mouse)	10090	Thy-1 membrane glycoprotein (Thy-1 antigen) (CD antigen CD90)	false	reviewed	2_6
529	Signaling Cascade	1.027	1	Gnb1	Gnb1	P62874	0.87	Mus musculus (Mouse)	10090	Guanine nucleotide-binding protein G(I)/G(S)/G(T) subunit beta-1 (Transducin beta chain 1)	false	reviewed	1_3
146	Plasma Membrane	0.877	6	Nptn Sdfr1 Sdr1	Nptn	P97300	1.075	Mus musculus (Mouse)	10090	Neuroplastin (Stromal cell-derived receptor 1) (SDR-1)	false	reviewed	6_3
274	Synaptic Vesicle	0.836	1	Snca Syn	Snca	O55042	0.528	Mus musculus (Mouse)	10090	Alpha-synuclein (Non-A beta component of AD amyloid) (Non-A4 component of amyloid precursor) (NACP)	false	reviewed	1_3
530	Signaling Cascade	0.37	1	Gng2	Gng2	P63213	0.536	Mus musculus (Mouse)	10090	Guanine nucleotide-binding protein G(I)/G(S)/G(O) subunit gamma-2 (G gamma-I)	false	reviewed	1_3
275	Signaling Cascade	1.02	1	Ppp3ca Calna	Ppp3ca	P63328	0.945	Mus musculus (Mouse)	10090	Serine/threonine-protein phosphatase 2B catalytic subunit alpha isoform (EC 3.1.3.16) (CAM-PRP catalytic subunit) (Calmodulin-dependent calcineurin A subunit alpha isoform)	false	reviewed	1_11
662	Cytoskeleton	1.081	1	Sptan1 Spna2 Spta2	Sptan1	P16546	0.996	Mus musculus (Mouse)	10090	Spectrin alpha chain, non-erythrocytic 1 (Alpha-II spectrin) (Fodrin alpha chain)	false	reviewed	1_2
663	Plasma Membrane	1.008	1	Ank2	Ank2	Q8C8R3	0.986	Mus musculus (Mouse)	10090	Ankyrin-2 (ANK-2) (Brain ankyrin)	false	reviewed	1_2
152	Signaling Cascade	0.928	1	Camk2a	Camk2a	P11798	1.09	Mus musculus (Mouse)	10090	Calcium/calmodulin-dependent protein kinase type II subunit alpha (CaM kinase II subunit alpha) (CaMK-II subunit alpha) (EC 2.7.11.17)	false	reviewed	1_1
154	Synaptic Vesicle	0.919	1	Rims1 Kiaa0340 Rab3ip1 Rim1	Rims1	Q99NE5	0.996	Mus musculus (Mouse)	10090	Regulating synaptic membrane exocytosis protein 1 (Rab-3-interacting molecule 1) (RIM 1) (Rab-3-interacting protein 1)	false	reviewed	1_12
157	Synaptic Vesicle	0.979	1	Vapb	Vapb	Q9QY76	1.024	Mus musculus (Mouse)	10090	Vesicle-associated membrane protein-associated protein B (VAMP-B) (VAMP-associated protein B) (VAP-B) (VAMP-associated protein 33b)	false	reviewed	1_3
672	Plasma Membrane	1.0	1	Aplp2	Aplp2	Q06335	1.0	Mus musculus (Mouse)	10090	Amyloid-like protein 2 (APLP-2) (CDEI box-binding protein) (CDEBP)	false	reviewed	1_2
161	Plasma Membrane	0.801	1	Basp1 Nap22	Basp1	Q91XV3	0.636	Mus musculus (Mouse)	10090	Brain acid soluble protein 1 (22 kDa neuronal tissue-enriched acidic protein) (Neuronal axonal membrane protein NAP-22)	false	reviewed	1_1
549	Signaling Cascade	1.144	1	Camk2d Kiaa4163	Camk2d	Q6PHZ2	0.941	Mus musculus (Mouse)	10090	Calcium/calmodulin-dependent protein kinase type II subunit delta (CaM kinase II subunit delta) (CaMK-II subunit delta) (EC 2.7.11.17)	false	reviewed	1_1
295	Signaling Cascade	0.938	1	Nrxn1 Kiaa0578	Nrxn1	Q9CS84	1.061	Mus musculus (Mouse)	10090	Neurexin-1 (Neurexin I-alpha) (Neurexin-1-alpha)	false	reviewed	1_9
297	Synaptic Vesicle	0.997	1	Sv2a Kiaa0736 Sv2	Sv2a	Q9JIS5	1.001	Mus musculus (Mouse)	10090	Synaptic vesicle glycoprotein 2A (Synaptic vesicle protein 2) (Synaptic vesicle protein 2A) (Calcium regulator SV2A)	false	reviewed	1_4
300	Signaling Cascade	1.018	1	Ppp3cb Calnb	Ppp3cb	P48453	0.974	Mus musculus (Mouse)	10090	Serine/threonine-protein phosphatase 2B catalytic subunit beta isoform (EC 3.1.3.16) (CAM-PRP catalytic subunit) (Calmodulin-dependent calcineurin A subunit beta isoform)	false	reviewed	1_11
561	Plasma Membrane	0.907	1	Stx1a	Stx1a	O35526	1.043	Mus musculus (Mouse)	10090	Syntaxin-1A (Neuron-specific antigen HPC-1)	false	reviewed	1_3
562	Plasma Membrane	0.949	1	Cadm1 Igsf4 Necl2 Ra175 Syncam SynCam1 Tslc1	Cadm1	Q8R5M8	0.99	Mus musculus (Mouse)	10090	Cell adhesion molecule 1 (Immunoglobulin superfamily member 4) (IgSF4) (Nectin-like protein 2) (NECL-2) (Spermatogenic immunoglobulin superfamily) (SgIgSF) (Synaptic cell adhesion molecule) (SynCAM) (Tumor suppressor in lung cancer 1) (TSLC-1)	false	reviewed	1_9
308	Plasma Membrane	0.925	1	Gria1 Glur1	Gria1	P23818	1.044	Mus musculus (Mouse)	10090	Glutamate receptor 1 (GluR-1) (AMPA-selective glutamate receptor 1) (GluR-A) (GluR-K1) (Glutamate receptor ionotropic, AMPA 1) (GluA1)	false	reviewed	1_1
565	Plasma Membrane	1.0	1	App	App	P12023	1.0	Mus musculus (Mouse)	10090	Amyloid beta A4 protein (ABPP) (APP) (Alzheimer disease amyloid A4 protein homolog) (Amyloidogenic glycoprotein) (AG) [Cleaved into: N-APP; Soluble APP-alpha (S-APP-alpha); Soluble APP-beta (S-APP-beta); C99 (APP-C99); Beta-amyloid protein 42 (Beta-APP42); Beta-amyloid protein 40 (Beta-APP40); C83; P3(42); P3(40); C80; Gamma-secretase C-terminal fragment 59 (APP-C59) (Amyloid intracellular domain…	false	reviewed	1_2
311	Signaling Cascade	0.309	1	Calm1 Calm Cam Cam1; Calm2 Cam2 Camb; Calm3 Cam3 Camc	Calm1; Calm2; Calm3	P62204	0.542	Mus musculus (Mouse)	10090	Calmodulin (CaM)	false	reviewed	1_1
185	Cytoskeleton	0.894	1	Marcks Macs	Marcks	P26645	0.613	Mus musculus (Mouse)	10090	Myristoylated alanine-rich C-kinase substrate (MARCKS)	false	reviewed	1_1
314	Signaling Cascade	1.062	1	Camk2b Camk2d	Camk2b	P28652	1.054	Mus musculus (Mouse)	10090	Calcium/calmodulin-dependent protein kinase type II subunit beta (CaM kinase II subunit beta) (CaMK-II subunit beta) (EC 2.7.11.17)	false	reviewed	1_1
326	Plasma Membrane	1.038	1	Cask	Cask	O70589	1.062	Mus musculus (Mouse)	10090	Peripheral plasma membrane protein CASK (EC 2.7.11.1) (Calcium/calmodulin-dependent serine protein kinase)	false	reviewed	1_9
200	Synaptic Vesicle	0.936	1	Syt1	Syt1	P46096	1.078	Mus musculus (Mouse)	10090	Synaptotagmin-1 (Synaptotagmin I) (SytI) (p65)	false	reviewed	1_3
328	Plasma Membrane	0.914	1	Ncam1 Ncam	Ncam1	P13595	0.987	Mus musculus (Mouse)	10090	Neural cell adhesion molecule 1 (N-CAM-1) (NCAM-1) (CD antigen CD56)	false	reviewed	1_2
329	Plasma Membrane	0.933	1	L1cam Caml1	L1cam	P11627	1.14	Mus musculus (Mouse)	10090	Neural cell adhesion molecule L1 (N-CAM-L1) (NCAM-L1) (CD antigen CD171)	false	reviewed	1_2
203	Signaling Cascade	1.009	1	Canx	Canx	P35564	1.094	Mus musculus (Mouse)	10090	Calnexin	false	reviewed	1_2
81	Synaptic Vesicle	0.932	1	Pclo Acz	Pclo	Q9QYX7	1.053	Mus musculus (Mouse)	10090	Protein piccolo (Aczonin) (Brain-derived HLMN protein) (Multidomain presynaptic cytomatrix protein)	false	reviewed	1_12
83	Signaling Cascade	1.064	1	Rapgef4 Cgef2 Epac2	Rapgef4	Q9EQZ6	1.012	Mus musculus (Mouse)	10090	Rap guanine nucleotide exchange factor 4 (Exchange factor directly activated by cAMP 2) (Exchange protein directly activated by cAMP 2) (EPAC 2) (cAMP-dependent Rap1 guanine-nucleotide exchange factor) (cAMP-regulated guanine nucleotide exchange factor II) (cAMP-GEFII)	false	reviewed	1_12
467	Plasma Membrane	0.942	1	Atp2b2 Pmca2	Atp2b2	Q9R0K7	1.025	Mus musculus (Mouse)	10090	Plasma membrane calcium-transporting ATPase 2 (PMCA2) (EC 3.6.3.8) (Plasma membrane calcium ATPase isoform 2) (Plasma membrane calcium pump isoform 2)	false	reviewed	1_2
84	Plasma Membrane	0.901	1	Gpm6a M6a	Gpm6a	P35802	0.834	Mus musculus (Mouse)	10090	Neuronal membrane glycoprotein M6-a (M6a)	false	reviewed	1_3
214	Signaling Cascade	1.026	2	Prkca Pkca	Prkca	P20444	1.091	Mus musculus (Mouse)	10090	Protein kinase C alpha type (PKC-A) (PKC-alpha) (EC 2.7.11.13)	false	reviewed	2_2
216	Synaptic Vesicle	1.028	1	Stxbp1	Stxbp1	O08599	0.901	Mus musculus (Mouse)	10090	Syntaxin-binding protein 1 (Protein unc-18 homolog 1) (Unc18-1) (Protein unc-18 homolog A) (Unc-18A)	false	reviewed	1_3
224	Signaling Cascade	0.926	1	Prkcg Pkcc Pkcg Prkcc	Prkcg	P63318	1.126	Mus musculus (Mouse)	10090	Protein kinase C gamma type (PKC-gamma) (EC 2.7.11.13)	false	reviewed	1_1
100	Cytoskeleton	0.899	1	Akap5 Akap150	Akap5	D3YVF0	0.916	Mus musculus (Mouse)	10090	A-kinase anchor protein 5 (AKAP-5) (A-kinase anchor protein 150 kDa) (AKAP 150) (P150) (cAMP-dependent protein kinase regulatory subunit II high affinity-binding protein)	false	reviewed	1_1
490	Synaptic Vesicle	0.944	1	Vamp2 Syb2	Vamp2	P63044	0.853	Mus musculus (Mouse)	10090	Vesicle-associated membrane protein 2 (VAMP-2) (Synaptobrevin-2)	false	reviewed	1_3
236	Synaptic Vesicle	0.926	1	Rph3a	Rph3a	P47708	0.958	Mus musculus (Mouse)	10090	Rabphilin-3A (Exophilin-1)	false	reviewed	1_6
