# Supplementary material for: APP Is a Context-Sensitive Regulator of the Hippocampal Presynaptic Active Zone
Source: PLOS journal article supplement (doi:10.1371/journal.pcbi.1004832), 2016-04-19
Supplement: S6 (10.1371/journal.pcbi.1004832.s006) [file journal.pcbi.1004832.s006.cys › CytoscapeSession-2016_01_22-10_07/tables/4116-Core+Network+Subcommunities/SHARED_ATTRS-org.cytoscape.model.CyEdge-4116+shared+edge.cytable]

CyCSV-Version	1
SUID	shared interaction	shared name
java.lang.Long	java.lang.String	java.lang.String
4116 shared edge
4757	pp	Q01097 (pp) Q80Z38
4758	pp	Q01097 (pp) P05132
4759	pp	Q01097 (pp) P15105
4760	pp	Q01097 (pp) O35526
4761	pp	Q01097 (pp) P51881
4762	pp	Q01097 (pp) P68510
4763	pp	Q01097 (pp) Q60676
4764	pp	Q01097 (pp) P12367
4765	pp	Q01097 (pp) P63085
4766	pp	Q01097 (pp) P47754
4767	pp	Q01097 (pp) Q03265
4768	pp	Q01097 (pp) P62835
4769	pp	Q01097 (pp) Q6PHZ2
4770	pp	Q01097 (pp) Q9D6M3
4771	pp	Q01097 (pp) P63101
4772	pp	Q01097 (pp) P17426
4773	pp	Q01097 (pp) P68033
4774	pp	Q01097 (pp) P68369
4775	pp	Q01097 (pp) P47757
4776	pp	Q01097 (pp) P05063
4777	pp	Q01097 (pp) P20357
4778	pp	Q01097 (pp) P31938
4779	pp	Q01097 (pp) P16054
4780	pp	Q01097 (pp) P51863
4781	pp	Q01097 (pp) P16858
4782	pp	Q01097 (pp) P06151
4783	pp	Q01097 (pp) P60879
4784	pp	Q01097 (pp) O88952
4785	pp	Q01097 (pp) P05480
4786	pp	Q01097 (pp) P50516
4787	pp	Q01097 (pp) P63318
4788	pp	Q01097 (pp) P97772
4789	pp	Q01097 (pp) P68404
4790	pp	Q01097 (pp) O55100
4791	pp	Q01097 (pp) Q91VR2
4792	pp	Q01097 (pp) P35279
4793	pp	Q01097 (pp) P63321
4794	pp	Q01097 (pp) P61982
4795	pp	Q01097 (pp) P60710
4796	pp	Q01097 (pp) P08553
4797	pp	Q01097 (pp) P62204
4798	pp	Q01097 (pp) Q61411
4799	pp	Q01097 (pp) P62259
4800	pp	Q01097 (pp) P48962
4801	pp	Q01097 (pp) O08599
4802	pp	Q01097 (pp) Q923T9
4803	pp	Q01097 (pp) Q9JM76
4804	pp	Q01097 (pp) P46096
4805	pp	Q01097 (pp) P63328
4806	pp	Q01097 (pp) P63001
4807	pp	Q01097 (pp) P59999
4808	pp	Q01097 (pp) F6SEU4
4809	pp	Q01097 (pp) P63011
4810	pp	Q01097 (pp) Q8BH59
4811	pp	Q01097 (pp) P17751
4812	pp	Q01097 (pp) O88737
4813	pp	Q01097 (pp) P06837
4814	pp	Q01097 (pp) P43006
4815	pp	Q01097 (pp) Q9CVB6
4816	pp	Q01097 (pp) P08551
4817	pp	Q01097 (pp) P11627
4818	pp	Q01097 (pp) P13020
4819	pp	Q01097 (pp) P05202
4820	pp	Q01097 (pp) P62874
4821	pp	Q01097 (pp) P35438
4822	pp	Q01097 (pp) P30999
4823	pp	Q01097 (pp) D3YVF0
4824	pp	Q01097 (pp) Q9QXS6
4825	pp	Q01097 (pp) P39053
4826	pp	Q01097 (pp) P63330
4827	pp	Q01097 (pp) P46660
4828	pp	Q01097 (pp) P53994
4829	pp	Q01097 (pp) P35436
4830	pp	Q01097 (pp) O35129
4831	pp	Q01097 (pp) P68181
4832	pp	Q01097 (pp) Q61879
4833	pp	Q01097 (pp) P31324
4834	pp	Q01097 (pp) P57780
4835	pp	Q01097 (pp) P15116
4836	pp	Q01097 (pp) A2CG49
4837	pp	Q01097 (pp) P12382
4838	pp	Q80Z38 (pp) Q8BYM5
4839	pp	Q80Z38 (pp) P35438
4840	pp	Q9CQZ5 (pp) Q9D6J6
4841	pp	Q9CQZ5 (pp) P48771
4842	pp	Q9CQZ5 (pp) Q91VR2
4843	pp	Q9CQZ5 (pp) Q91VD9
4844	pp	Q9CQZ5 (pp) Q9CPP6
4845	pp	Q9CQZ5 (pp) Q9CQZ6
4846	pp	Q9CQZ5 (pp) P19536
4847	pp	Q9CQZ5 (pp) O09111
4848	pp	Q9CQZ5 (pp) P97450
4849	pp	Q9CQZ5 (pp) Q91YT0
4850	pp	Q9CQZ5 (pp) Q9CQ69
4851	pp	Q9CQZ5 (pp) Q99LC5
4852	pp	Q9CQZ5 (pp) P99029
4853	pp	Q9CQZ5 (pp) Q9CPQ8
4854	pp	Q9CQZ5 (pp) Q9CQC7
4855	pp	Q9CQZ5 (pp) Q3UIU2
4856	pp	Q9CQZ5 (pp) Q9CQQ7
4857	pp	Q9CQZ5 (pp) Q62425
4858	pp	Q9CQZ5 (pp) Q9CR68
4859	pp	Q9CQZ5 (pp) Q9CZ13
4860	pp	Q9CQZ5 (pp) Q9DC69
4861	pp	Q9CQZ5 (pp) Q9D0S9
4862	pp	Q9CQZ5 (pp) Q99LC3
4863	pp	Q9CQZ5 (pp) Q9D6J5
4864	pp	Q9CQZ5 (pp) Q9DCS9
4865	pp	Q9CQZ5 (pp) Q06185
4866	pp	Q9CQZ5 (pp) Q9DCX2
4867	pp	Q9CQZ5 (pp) Q9DB20
4868	pp	Q9CQZ5 (pp) Q9CQ54
4869	pp	Q9CQZ5 (pp) Q9D3D9
4870	pp	Q9CQZ5 (pp) Q9ERS2
4871	pp	Q9CQZ5 (pp) Q9WUM5
4872	pp	Q9CQZ5 (pp) Q9DCJ5
4873	pp	Q9CQZ5 (pp) Q8K3J1
4874	pp	Q9CQZ5 (pp) Q9D0M3
4875	pp	Q9CQZ5 (pp) Q99LX0
4876	pp	Q9CQZ5 (pp) Q9CQH3
4877	pp	Q9CQZ5 (pp) Q9DB77
4878	pp	Q9CQZ5 (pp) Q9Z1P6
4879	pp	Q9D6J6 (pp) Q01097
4880	pp	O08749 (pp) Q9D051
4881	pp	O08749 (pp) P97807
4882	pp	O08749 (pp) Q91YT0
4883	pp	O08749 (pp) Q03265
4884	pp	O08749 (pp) Q99LC5
4885	pp	O08749 (pp) Q6PB66
4886	pp	O08749 (pp) Q60931
4887	pp	O08749 (pp) Q99KI0
4888	pp	O08749 (pp) Q9Z2I9
4889	pp	O08749 (pp) Q9WUM5
4890	pp	O08749 (pp) Q60597
4891	pp	O08749 (pp) Q9D6J6
4892	pp	O08749 (pp) Q8BKZ9
4893	pp	O08749 (pp) Q8BMF4
4894	pp	O08749 (pp) P63038
4895	pp	O08749 (pp) P99029
4896	pp	O08749 (pp) O88441
4897	pp	O08749 (pp) Q91VD9
4898	pp	O08749 (pp) Q9CQH3
4899	pp	O08749 (pp) P09671
4900	pp	O08749 (pp) Q91VR2
4901	pp	O08749 (pp) Q8K2B3
4902	pp	O08749 (pp) Q9CZU6
4903	pp	O08749 (pp) Q9CQA3
4904	pp	O08749 (pp) P52480
4905	pp	O08749 (pp) Q9DB77
4906	pp	O08749 (pp) P08249
4907	pp	O08749 (pp) Q9D2G2
4908	pp	O08749 (pp) Q9D6R2
4909	pp	O08749 (pp) P35486
4910	pp	O08749 (pp) Q91ZJ5
4911	pp	O08749 (pp) Q9DC69
4912	pp	O08749 (pp) P56480
4913	pp	Q9D051 (pp) Q03265
4914	pp	Q9D051 (pp) Q91VD9
4915	pp	Q9D051 (pp) Q8BMF4
4916	pp	Q9D051 (pp) Q9DB77
4917	pp	Q9D051 (pp) P63101
4918	pp	Q9D051 (pp) Q9CQQ7
4919	pp	Q9D051 (pp) P52480
4920	pp	Q9D051 (pp) Q9D6R2
4921	pp	Q9D051 (pp) P40142
4922	pp	Q9D051 (pp) P16054
4923	pp	Q9D051 (pp) P06151
4924	pp	Q9D051 (pp) P97450
4925	pp	Q9D051 (pp) Q8BMF3
4926	pp	Q9D051 (pp) P97807
4927	pp	Q9D051 (pp) Q9CQH3
4928	pp	Q9D051 (pp) Q9D0M3
4929	pp	Q9D051 (pp) Q9D2G2
4930	pp	Q9D051 (pp) Q9CR68
4931	pp	Q9D051 (pp) Q05920
4932	pp	Q9D051 (pp) Q9DCJ5
4933	pp	Q9D051 (pp) Q99LC5
4934	pp	Q9D051 (pp) P35486
4935	pp	Q9D051 (pp) Q93092
4936	pp	Q9D051 (pp) P06745
4937	pp	Q9D3D9 (pp) O09111
4938	pp	Q9D3D9 (pp) Q9ERS2
4939	pp	Q9D3D9 (pp) Q9CQH3
4940	pp	Q9D3D9 (pp) Q91VR2
4941	pp	Q9D3D9 (pp) Q99LY9
4942	pp	Q9D3D9 (pp) Q9D6J6
4943	pp	O09111 (pp) Q9CQH3
4944	pp	O09111 (pp) Q9D6J6
4945	pp	Q03265 (pp) P68510
4946	pp	Q03265 (pp) Q91VM9
4947	pp	Q03265 (pp) Q9DC69
4948	pp	Q03265 (pp) Q9CR68
4949	pp	Q03265 (pp) Q9DCX2
4950	pp	Q03265 (pp) Q91VD9
4951	pp	Q03265 (pp) Q9CZ13
4952	pp	Q03265 (pp) P97807
4953	pp	Q03265 (pp) P16054
4954	pp	Q03265 (pp) P09411
4955	pp	Q03265 (pp) Q8K3J1
4956	pp	Q03265 (pp) Q99LC5
4957	pp	Q03265 (pp) Q9R0Y5
4958	pp	Q03265 (pp) Q91VR2
4959	pp	Q03265 (pp) Q91YT0
4960	pp	Q03265 (pp) Q9WUM5
4961	pp	Q03265 (pp) Q06185
4962	pp	Q03265 (pp) Q9DB77
4963	pp	Q03265 (pp) P63038
4964	pp	Q03265 (pp) Q60931
4965	pp	Q03265 (pp) Q8VEM8
4966	pp	Q03265 (pp) Q9D2G2
4967	pp	Q03265 (pp) Q9D3D9
4968	pp	Q03265 (pp) P48962
4969	pp	Q03265 (pp) P19536
4970	pp	Q03265 (pp) P03930
4971	pp	Q03265 (pp) Q9CQQ7
4972	pp	Q03265 (pp) O35143
4973	pp	Q03265 (pp) Q9D6J6
4974	pp	Q03265 (pp) Q9CQH3
4975	pp	Q03265 (pp) P43024
4976	pp	P68510 (pp) P05202
4977	pp	P68510 (pp) P17751
4978	pp	P68510 (pp) Q99PT1
4979	pp	P68510 (pp) P68368
4980	pp	P68510 (pp) Q9D8B3
4981	pp	P68510 (pp) Q9CQ92
4982	pp	P68510 (pp) Q91VZ6
4983	pp	P68510 (pp) Q8VBV7
4984	pp	P68510 (pp) P08249
4985	pp	P68510 (pp) Q61553
4986	pp	P68510 (pp) P67871
4987	pp	P68510 (pp) O55042
4988	pp	P68510 (pp) P10637
4989	pp	P68510 (pp) P61164
4990	pp	P68510 (pp) Q9R0Q6
4991	pp	P68510 (pp) P63101
4992	pp	P68510 (pp) P48036
4993	pp	P68510 (pp) P50518
4994	pp	P68510 (pp) P12787
4995	pp	P68510 (pp) Q9CWS0
4996	pp	P68510 (pp) Q68FD5
4997	pp	P68510 (pp) P54071
4998	pp	P68510 (pp) Q9ERS2
4999	pp	P68510 (pp) P42208
5000	pp	P68510 (pp) P46460
5001	pp	P68510 (pp) Q60930
5002	pp	P68510 (pp) Q9DCW4
5003	pp	P68510 (pp) Q9WV55
5004	pp	P68510 (pp) P11499
5005	pp	P68510 (pp) Q9D051
5006	pp	P68510 (pp) P56480
5007	pp	P68510 (pp) Q9CQW1
5008	pp	P68510 (pp) Q9DCJ5
5009	pp	P68510 (pp) P62259
5010	pp	P12382 (pp) P35438
5011	pp	P12382 (pp) P17710
5012	pp	P12382 (pp) P05063
5013	pp	P12382 (pp) P05064
5014	pp	P12382 (pp) Q93092
5015	pp	P12382 (pp) P63101
5016	pp	P12382 (pp) P06745
5017	pp	P12382 (pp) P52480
5018	pp	P12382 (pp) P47857
5019	pp	P12382 (pp) P17751
5020	pp	P35438 (pp) P28652
5021	pp	P35438 (pp) Q6PIC6
5022	pp	P35438 (pp) Q60631
5023	pp	P35438 (pp) P68033
5024	pp	P35438 (pp) P06837
5025	pp	P35438 (pp) P68368
5026	pp	P35438 (pp) P62259
5027	pp	P35438 (pp) O55100
5028	pp	P35438 (pp) P57780
5029	pp	P35438 (pp) Q8BMF4
5030	pp	P35438 (pp) Q6URW6
5031	pp	P35438 (pp) O88737
5032	pp	P35438 (pp) A2CG49
5033	pp	P35438 (pp) P63017
5034	pp	P35438 (pp) P12367
5035	pp	P35438 (pp) O35526
5036	pp	P35438 (pp) F6SEU4
5037	pp	P35438 (pp) P11627
5038	pp	P05202 (pp) P54071
5039	pp	P05202 (pp) Q9D6R2
5040	pp	P05202 (pp) Q60597
5041	pp	P05202 (pp) Q05920
5042	pp	P05202 (pp) Q8BH04
5043	pp	P05202 (pp) P06151
5044	pp	P05202 (pp) P70404
5045	pp	Q9QUI0 (pp) Q06335
5046	pp	Q9QUI0 (pp) Q99PT1
5047	pp	Q9QUI0 (pp) P30999
5048	pp	Q9QUI0 (pp) P63001
5049	pp	Q9QUI0 (pp) O88643
5050	pp	Q06335 (pp) Q9QXJ1
5051	pp	Q06335 (pp) P63330
5052	pp	Q06335 (pp) P04925
5053	pp	Q06335 (pp) P12023
5054	pp	Q06335 (pp) P63001
5055	pp	Q06335 (pp) Q03157
5056	pp	P23819 (pp) P35436
5057	pp	P23819 (pp) P68369
5058	pp	P23819 (pp) P99024
5059	pp	P23819 (pp) O08599
5060	pp	P23819 (pp) P38647
5061	pp	P23819 (pp) P16330
5062	pp	P35436 (pp) P35438
5063	pp	Q9CZU6 (pp) Q9DCD0
5064	pp	Q9CZU6 (pp) Q91VD9
5065	pp	Q9CZU6 (pp) P05202
5066	pp	Q9CZU6 (pp) Q8BKZ9
5067	pp	Q9CZU6 (pp) Q8BMF3
5068	pp	Q9CZU6 (pp) P26443
5069	pp	Q9CZU6 (pp) P08249
5070	pp	Q9CZU6 (pp) Q91VR2
5071	pp	Q9CZU6 (pp) P97807
5072	pp	Q9CZU6 (pp) P06151
5073	pp	Q9CZU6 (pp) Q8K2B3
5074	pp	Q9CZU6 (pp) Q99KI0
5075	pp	Q9CZU6 (pp) Q8BWT1
5076	pp	Q9CZU6 (pp) Q91WD5
5077	pp	Q9CZU6 (pp) Q91YT0
5078	pp	Q9CZU6 (pp) Q03265
5079	pp	Q9CZU6 (pp) P52480
5080	pp	Q9CZU6 (pp) P09671
5081	pp	Q9CZU6 (pp) Q9D0M3
5082	pp	Q9CZU6 (pp) Q9CQA3
5083	pp	Q9CZU6 (pp) Q99JY0
5084	pp	Q9CZU6 (pp) Q8BMF4
5085	pp	Q9CZU6 (pp) Q8BH04
5086	pp	Q9CZU6 (pp) P35486
5087	pp	Q9CZU6 (pp) Q8BGH2
5088	pp	Q9CZU6 (pp) Q60597
5089	pp	Q9CZU6 (pp) Q9DB20
5090	pp	Q9CZU6 (pp) Q9D6R2
5091	pp	Q9CZU6 (pp) P70404
5092	pp	Q9CZU6 (pp) Q9WUM5
5093	pp	Q9CZU6 (pp) Q8QZT1
5094	pp	Q9CZU6 (pp) P56480
5095	pp	Q9CZU6 (pp) Q9D2G2
5096	pp	Q9CZU6 (pp) Q05920
5097	pp	Q9CZU6 (pp) Q9D6J6
5098	pp	Q9CZU6 (pp) Q9CZ13
5099	pp	Q9CZU6 (pp) Q9CR68
5100	pp	Q9CZU6 (pp) P19096
5101	pp	Q9DCD0 (pp) Q9D0F9
5102	pp	Q9DCD0 (pp) Q8BMS1
5103	pp	Q9DCD0 (pp) Q91ZJ5
5104	pp	Q9DCD0 (pp) P06151
5105	pp	Q9DCD0 (pp) Q8CAQ8
5106	pp	P51863 (pp) Q9Z1G3
5107	pp	P51863 (pp) P63082
5108	pp	P51863 (pp) Q8BVE3
5109	pp	P51863 (pp) P50516
5110	pp	P51863 (pp) P57746
5111	pp	P51863 (pp) Q9Z1G4
5112	pp	P51863 (pp) Q9EPJ9
5113	pp	P51863 (pp) P50518
5114	pp	P51863 (pp) Q9WTT4
5115	pp	Q9Z1G3 (pp) P62331
5116	pp	Q9Z1G3 (pp) Q9WTT4
5117	pp	Q9Z1G3 (pp) Q9Z1G4
5118	pp	Q9Z1G3 (pp) P50516
5119	pp	Q9Z1G3 (pp) Q91VM9
5120	pp	Q9Z1G3 (pp) Q8BVE3
5121	pp	Q9Z1G3 (pp) P63082
5122	pp	Q9Z1G3 (pp) P23506
5123	pp	P62259 (pp) P47757
5124	pp	P62259 (pp) P46660
5125	pp	P62259 (pp) Q9JLM8
5126	pp	P62259 (pp) O88935
5127	pp	P62259 (pp) P10637
5128	pp	P62259 (pp) P63101
5129	pp	P62259 (pp) Q9QWI6
5130	pp	P62259 (pp) P16858
5131	pp	P62259 (pp) Q9DC28
5132	pp	P62259 (pp) Q03265
5133	pp	P62259 (pp) P30999
5134	pp	P62259 (pp) Q61316
5135	pp	P62259 (pp) Q68FF6
5136	pp	P62259 (pp) Q3UTJ2
5137	pp	P62259 (pp) Q812A2
5138	pp	P47757 (pp) O89053
5139	pp	Q8C8R3 (pp) P16546
5140	pp	Q8C8R3 (pp) P11627
5141	pp	P16546 (pp) Q9CQV8
5142	pp	P16546 (pp) O08788
5143	pp	P63330 (pp) Q76MZ3
5144	pp	P63330 (pp) Q60996
5145	pp	P63330 (pp) Q61151
5146	pp	P63330 (pp) P35438
5147	pp	P63330 (pp) Q6P1F6
5148	pp	Q76MZ3 (pp) Q6P1F6
5149	pp	Q76MZ3 (pp) O08788
5150	pp	Q76MZ3 (pp) P63101
5151	pp	Q76MZ3 (pp) P35438
5152	pp	Q76MZ3 (pp) Q99KJ8
5153	pp	Q76MZ3 (pp) Q60996
5154	pp	Q76MZ3 (pp) P50396
5155	pp	Q76MZ3 (pp) P62259
5156	pp	Q76MZ3 (pp) P61982
5157	pp	Q76MZ3 (pp) P18052
5158	pp	Q76MZ3 (pp) Q61151
5159	pp	Q76MZ3 (pp) Q9DC28
5160	pp	Q9CQZ6 (pp) Q9CQ54
5161	pp	Q9CQZ6 (pp) Q99LC3
5162	pp	Q9CQZ6 (pp) Q3UIU2
5163	pp	Q9CQZ6 (pp) Q9CQH3
5164	pp	Q9CQZ6 (pp) Q9CR68
5165	pp	Q9CQZ6 (pp) Q9DCS9
5166	pp	Q9CQZ6 (pp) Q06185
5167	pp	Q9CQZ6 (pp) Q9D6J6
5168	pp	Q9CQZ6 (pp) Q9WUM5
5169	pp	Q9CQZ6 (pp) Q62425
5170	pp	Q9CQZ6 (pp) Q9ERS2
5171	pp	Q9CQZ6 (pp) Q8K3J1
5172	pp	Q9CQZ6 (pp) Q91YT0
5173	pp	Q9CQZ6 (pp) Q91VR2
5174	pp	Q9CQZ6 (pp) Q99LY9
5175	pp	Q9CQZ6 (pp) Q9DCX2
5176	pp	Q9CQZ6 (pp) Q9DB77
5177	pp	Q9CQZ6 (pp) P56391
5178	pp	Q9CQZ6 (pp) Q9DC69
5179	pp	Q9CQZ6 (pp) Q9Z1P6
5180	pp	Q9CQZ6 (pp) Q9CPQ8
5181	pp	Q9CQZ6 (pp) Q99LC5
5182	pp	Q9CQZ6 (pp) Q9DCJ5
5183	pp	Q9CQZ6 (pp) P48771
5184	pp	Q9CQZ6 (pp) Q9CQQ7
5185	pp	Q9CQZ6 (pp) Q99LX0
5186	pp	Q9CQZ6 (pp) Q9CQ69
5187	pp	Q9CQ54 (pp) Q91YT0
5188	pp	Q9CQ54 (pp) O09111
5189	pp	Q9CQ54 (pp) Q9DC69
5190	pp	Q9CQ54 (pp) Q9CQQ7
5191	pp	Q9CQ54 (pp) Q9DCJ5
5192	pp	Q9CQ54 (pp) Q06185
5193	pp	Q9CQ54 (pp) Q8K3J1
5194	pp	Q9CQ54 (pp) Q9CQ69
5195	pp	Q9CQ54 (pp) Q9D6J6
5196	pp	Q9CQ54 (pp) Q9DCS9
5197	pp	Q9CQ54 (pp) Q99LY9
5198	pp	Q9CQ54 (pp) Q9CQH3
5199	pp	Q9CQ54 (pp) Q9Z1P6
5200	pp	Q9CQ54 (pp) Q3UIU2
5201	pp	Q9DCT2 (pp) Q9CQ69
5202	pp	Q9DCT2 (pp) P19783
5203	pp	Q9DCT2 (pp) Q99LC3
5204	pp	Q9DCT2 (pp) O70325
5205	pp	Q9DCT2 (pp) Q9CQA3
5206	pp	Q9DCT2 (pp) Q8K1Z0
5207	pp	Q9DCT2 (pp) P19536
5208	pp	Q9DCT2 (pp) Q9DC70
5209	pp	Q9DCT2 (pp) Q3UIU2
5210	pp	Q9DCT2 (pp) Q9DB77
5211	pp	Q9DCT2 (pp) Q9CQQ7
5212	pp	Q9DCT2 (pp) Q9D6J6
5213	pp	Q9DCT2 (pp) Q9DCS9
5214	pp	Q9DCT2 (pp) Q9D3D9
5215	pp	Q9DCT2 (pp) P48771
5216	pp	Q9DCT2 (pp) P17751
5217	pp	Q9DCT2 (pp) Q8K3J1
5218	pp	Q9DCT2 (pp) Q91WD5
5219	pp	Q9DCT2 (pp) Q9D6J5
5220	pp	Q9DCT2 (pp) P56391
5221	pp	Q9DCT2 (pp) Q9ERS2
5222	pp	Q9DCT2 (pp) Q03265
5223	pp	Q9DCT2 (pp) Q8BGH2
5224	pp	Q9DCT2 (pp) Q9CQC7
5225	pp	Q9DCT2 (pp) Q9WUM5
5226	pp	Q9DCT2 (pp) Q9CQJ8
5227	pp	Q9DCT2 (pp) Q9CXZ1
5228	pp	Q9DCT2 (pp) Q99LC5
5229	pp	Q9DCT2 (pp) Q99LY9
5230	pp	Q9DCT2 (pp) Q7TMF3
5231	pp	Q9DCT2 (pp) Q9CR68
5232	pp	Q9DCT2 (pp) P42125
5233	pp	Q9DCT2 (pp) Q9CQZ6
5234	pp	Q9DCT2 (pp) P99029
5235	pp	Q9DCT2 (pp) Q9D051
5236	pp	Q9DCT2 (pp) Q9DC69
5237	pp	Q9DCT2 (pp) Q9D855
5238	pp	Q9DCT2 (pp) Q9DCX2
5239	pp	Q9DCT2 (pp) Q9CQR4
5240	pp	Q9DCT2 (pp) Q9DCJ5
5241	pp	Q9DCT2 (pp) P09671
5242	pp	Q9DCT2 (pp) P56480
5243	pp	Q9DCT2 (pp) Q8K2B3
5244	pp	Q9DCT2 (pp) Q9CQ75
5245	pp	Q9DCT2 (pp) P52503
5246	pp	Q9DCT2 (pp) Q91VD9
5247	pp	Q9DCT2 (pp) Q8BH95
5248	pp	Q9DCT2 (pp) Q91YT0
5249	pp	Q9DCT2 (pp) P56379
5250	pp	Q9DCT2 (pp) Q9CZ13
5251	pp	Q9DCT2 (pp) Q9DB20
5252	pp	Q9DCT2 (pp) Q8VEM8
5253	pp	Q9DCT2 (pp) Q9CPP6
5254	pp	Q9DCT2 (pp) Q9CQ54
5255	pp	Q9DCT2 (pp) Q9D0M3
5256	pp	Q9DCT2 (pp) Q99KI0
5257	pp	Q9DCT2 (pp) Q91VR2
5258	pp	Q9DCT2 (pp) O88441
5259	pp	Q9DCT2 (pp) Q9CQH3
5260	pp	Q9DCT2 (pp) Q62425
5261	pp	Q9DCT2 (pp) O09111
5262	pp	Q9DCT2 (pp) P68510
5263	pp	Q9DCT2 (pp) P62073
5264	pp	Q9DCT2 (pp) P08249
5265	pp	Q9DCT2 (pp) Q9CPQ1
5266	pp	Q9DCT2 (pp) Q9D0S9
5267	pp	Q9DCT2 (pp) P50516
5268	pp	Q9DCT2 (pp) P97807
5269	pp	Q9DCT2 (pp) Q9Z1P6
5270	pp	Q9DCT2 (pp) Q9CR62
5271	pp	Q9DCT2 (pp) Q9CZU6
5272	pp	Q9DCT2 (pp) Q80Y14
5273	pp	Q9DCT2 (pp) Q9CQZ5
5274	pp	Q9DCT2 (pp) P70404
5275	pp	Q9DCT2 (pp) Q06185
5276	pp	Q9DCT2 (pp) Q99LX0
5277	pp	Q9DCT2 (pp) P97450
5278	pp	Q9CQ69 (pp) P56391
5279	pp	Q9CQ69 (pp) Q8K3J1
5280	pp	Q9CQ69 (pp) Q99LY9
5281	pp	Q9CQ69 (pp) Q9D6J6
5282	pp	Q9CQ69 (pp) Q9DCJ5
5283	pp	Q9CQ69 (pp) Q9CQH3
5284	pp	Q9CQ69 (pp) Q9DC69
5285	pp	Q9CQ69 (pp) Q9ERS2
5286	pp	Q9CQ69 (pp) Q9D3D9
5287	pp	Q9CQ69 (pp) P00405
5288	pp	Q9CQ69 (pp) Q91VR2
5289	pp	Q9CQ69 (pp) Q3UIU2
5290	pp	Q9CQ69 (pp) P17665
5291	pp	Q9CQ69 (pp) O09111
5292	pp	Q9CQ69 (pp) Q9CQQ7
5293	pp	Q9CQ69 (pp) Q99LX0
5294	pp	P08249 (pp) Q9D6R2
5295	pp	P08249 (pp) Q06185
5296	pp	P08249 (pp) Q91VR2
5297	pp	P08249 (pp) P70404
5298	pp	P08249 (pp) O35658
5299	pp	P08249 (pp) P17751
5300	pp	P08249 (pp) Q9DCD0
5301	pp	P08249 (pp) P56480
5302	pp	P08249 (pp) Q9D3D9
5303	pp	P08249 (pp) P97807
5304	pp	P08249 (pp) Q64521
5305	pp	P08249 (pp) Q60931
5306	pp	P08249 (pp) Q8BGH2
5307	pp	P08249 (pp) Q9D051
5308	pp	P08249 (pp) Q9D855
5309	pp	P08249 (pp) Q8K2B3
5310	pp	P08249 (pp) P05202
5311	pp	P08249 (pp) Q9DC70
5312	pp	P08249 (pp) Q8BH04
5313	pp	P08249 (pp) P63038
5314	pp	P08249 (pp) Q9D6J6
5315	pp	P08249 (pp) Q9CQC7
5316	pp	P08249 (pp) Q9CR68
5317	pp	P08249 (pp) Q9DB77
5318	pp	P08249 (pp) P09411
5319	pp	P08249 (pp) Q9DC69
5320	pp	P08249 (pp) Q8K3J1
5321	pp	P08249 (pp) Q8BMF3
5322	pp	P08249 (pp) Q8BMF4
5323	pp	P08249 (pp) Q9CQJ8
5324	pp	P08249 (pp) Q8VEM8
5325	pp	P08249 (pp) Q99KI0
5326	pp	P08249 (pp) O09111
5327	pp	P08249 (pp) Q99LX0
5328	pp	P08249 (pp) Q9DCX2
5329	pp	P08249 (pp) Q05920
5330	pp	P08249 (pp) Q91YT0
5331	pp	P08249 (pp) Q9Z2I9
5332	pp	P08249 (pp) P19783
5333	pp	P08249 (pp) Q91VD9
5334	pp	P08249 (pp) Q9DB20
5335	pp	P08249 (pp) P54071
5336	pp	P08249 (pp) P52480
5337	pp	P08249 (pp) Q9D2G2
5338	pp	P08249 (pp) Q9DCJ5
5339	pp	P08249 (pp) P97450
5340	pp	P08249 (pp) Q9WUM5
5341	pp	P08249 (pp) P26443
5342	pp	P08249 (pp) Q9CQZ5
5343	pp	P08249 (pp) Q9CZ13
5344	pp	P08249 (pp) Q9D0M3
5345	pp	P08249 (pp) P06745
5346	pp	P08249 (pp) P48962
5347	pp	P08249 (pp) Q03265
5348	pp	P08249 (pp) Q9CQH3
5349	pp	P08249 (pp) Q9CQQ7
5350	pp	P08249 (pp) Q9DCS9
5351	pp	Q9D6R2 (pp) P70404
5352	pp	Q9D6R2 (pp) P16054
5353	pp	Q9D6R2 (pp) Q8BWF0
5354	pp	Q9D6R2 (pp) Q91VR2
5355	pp	Q9D6R2 (pp) Q8K3J1
5356	pp	Q9D6R2 (pp) Q60597
5357	pp	Q9D6R2 (pp) P54071
5358	pp	Q9D6R2 (pp) Q9D2G2
5359	pp	Q9D6R2 (pp) Q9WUM5
5360	pp	P54071 (pp) P06151
5361	pp	P54071 (pp) Q60597
5362	pp	P54071 (pp) P70404
5363	pp	Q9DB20 (pp) Q9CQH3
5364	pp	Q9DB20 (pp) P67778
5365	pp	Q9DB20 (pp) Q9DCX2
5366	pp	Q9DB20 (pp) O09111
5367	pp	Q9DB20 (pp) Q9D6J5
5368	pp	Q9DB20 (pp) Q99LX0
5369	pp	Q9DB20 (pp) Q9DCJ5
5370	pp	Q9DB20 (pp) Q9CPP6
5371	pp	Q9DB20 (pp) P99029
5372	pp	Q9DB20 (pp) Q9CQ69
5373	pp	Q9DB20 (pp) Q9CR68
5374	pp	Q9DB20 (pp) P97807
5375	pp	Q9DB20 (pp) Q9CZ13
5376	pp	Q9DB20 (pp) Q9D6J6
5377	pp	Q9DB20 (pp) P19783
5378	pp	Q9DB20 (pp) P56391
5379	pp	Q9DB20 (pp) Q3UIU2
5380	pp	Q9DB20 (pp) Q9DC69
5381	pp	Q9DB20 (pp) Q9CQQ7
5382	pp	Q9DB20 (pp) P62073
5383	pp	Q9DB20 (pp) Q9ERS2
5384	pp	Q9DB20 (pp) Q9D3D9
5385	pp	Q9DB20 (pp) Q91YT0
5386	pp	Q9DB20 (pp) Q9WUM5
5387	pp	Q9DB20 (pp) P17751
5388	pp	Q9DB20 (pp) Q78IK2
5389	pp	Q9DB20 (pp) Q8K3J1
5390	pp	Q9DB20 (pp) Q06185
5391	pp	Q9DB20 (pp) Q91VM9
5392	pp	Q9DB20 (pp) Q9DCS9
5393	pp	Q9DB20 (pp) P43024
5394	pp	Q9DB20 (pp) P56480
5395	pp	Q9DB20 (pp) Q03265
5396	pp	Q9DB20 (pp) Q9Z1P6
5397	pp	Q9DB20 (pp) Q9CPQ8
5398	pp	Q9DB20 (pp) Q91VR2
5399	pp	Q9DB20 (pp) Q9DB77
5400	pp	Q9CQH3 (pp) Q9D6J6
5401	pp	Q3UHD9 (pp) Q9Z2H5
5402	pp	Q9Z2H5 (pp) Q99N28
5403	pp	Q6P9K8 (pp) O88952
5404	pp	Q6P9K8 (pp) O70589
5405	pp	O88952 (pp) P60469
5406	pp	O88952 (pp) O70589
5407	pp	P19783 (pp) Q9CQH3
5408	pp	P19783 (pp) Q9CQ69
5409	pp	P19783 (pp) Q9CR68
5410	pp	P19783 (pp) P19536
5411	pp	P19783 (pp) Q9D3D9
5412	pp	P19783 (pp) Q91YT0
5413	pp	P19783 (pp) Q06185
5414	pp	P19783 (pp) Q91VR2
5415	pp	P19783 (pp) Q9ERS2
5416	pp	P19783 (pp) P17665
5417	pp	P19783 (pp) Q9DCX2
5418	pp	P19783 (pp) Q99LX0
5419	pp	P19783 (pp) Q9CQQ7
5420	pp	P19783 (pp) P56391
5421	pp	P19783 (pp) P43024
5422	pp	P19783 (pp) P00405
5423	pp	P19783 (pp) Q9DCJ5
5424	pp	P19783 (pp) P48771
5425	pp	P19783 (pp) Q9DC69
5426	pp	Q8BK64 (pp) P63038
5427	pp	Q8BK64 (pp) Q60864
5428	pp	Q8BK64 (pp) P07901
5429	pp	Q8BK64 (pp) Q61699
5430	pp	Q8BK64 (pp) P11499
5431	pp	P63038 (pp) P52196
5432	pp	P63038 (pp) P09411
5433	pp	P63038 (pp) Q99LC5
5434	pp	P63038 (pp) P52480
5435	pp	P63038 (pp) P15105
5436	pp	P63038 (pp) Q9WUM5
5437	pp	P63038 (pp) Q9Z0X1
5438	pp	P63038 (pp) Q6PB66
5439	pp	P63038 (pp) Q8BIJ6
5440	pp	P63038 (pp) P63037
5441	pp	P63038 (pp) Q925I1
5442	pp	P63038 (pp) Q8CGK3
5443	pp	P63038 (pp) Q921G7
5444	pp	P63038 (pp) Q91VR2
5445	pp	P63038 (pp) Q61699
5446	pp	P63038 (pp) P17156
5447	pp	P63038 (pp) O35658
5448	pp	P63038 (pp) P67778
5449	pp	P63038 (pp) P97807
5450	pp	Q8BH95 (pp) Q9CZ13
5451	pp	Q8BH95 (pp) Q8BWT1
5452	pp	Q8BH95 (pp) Q8QZT1
5453	pp	Q8BH95 (pp) P51174
5454	pp	Q8BH95 (pp) P50544
5455	pp	Q8BH95 (pp) Q9JHI5
5456	pp	Q8BH95 (pp) Q8BMS1
5457	pp	Q8BH95 (pp) Q99MN9
5458	pp	Q8BH95 (pp) O08756
5459	pp	Q8BH95 (pp) Q61425
5460	pp	Q8BH95 (pp) Q99JY0
5461	pp	Q8BH95 (pp) Q99MR8
5462	pp	Q8BH95 (pp) Q9DCJ5
5463	pp	Q8BH95 (pp) Q9WUM5
5464	pp	Q8BH95 (pp) Q9CQ62
5465	pp	Q8BH95 (pp) Q99LC5
5466	pp	Q8BH95 (pp) Q9DC69
5467	pp	Q8BH95 (pp) Q9DBL1
5468	pp	Q9CZ13 (pp) Q9ERS2
5469	pp	Q9CZ13 (pp) Q9DCS9
5470	pp	Q9CZ13 (pp) P97807
5471	pp	Q9CZ13 (pp) P67778
5472	pp	Q9CZ13 (pp) Q91VD9
5473	pp	Q9CZ13 (pp) Q9D3D9
5474	pp	Q9CZ13 (pp) Q91YT0
5475	pp	Q9CZ13 (pp) O09111
5476	pp	Q9CZ13 (pp) Q8K1Z0
5477	pp	Q9CZ13 (pp) Q60597
5478	pp	Q9CZ13 (pp) Q9CQ69
5479	pp	Q9CZ13 (pp) Q9DCJ5
5480	pp	Q9CZ13 (pp) Q9Z1P6
5481	pp	Q9CZ13 (pp) Q9WUM5
5482	pp	Q9CZ13 (pp) P19783
5483	pp	Q9CZ13 (pp) Q9D6J6
5484	pp	Q9CZ13 (pp) Q91VR2
5485	pp	Q9CZ13 (pp) Q8K3J1
5486	pp	Q9CZ13 (pp) Q9CQH3
5487	pp	Q9CZ13 (pp) Q99P72
5488	pp	Q9CZ13 (pp) Q9DC69
5489	pp	Q9CZ13 (pp) Q9DB77
5490	pp	Q9CZ13 (pp) Q9CR68
5491	pp	Q9CZ13 (pp) Q99LY9
5492	pp	Q9D0M3 (pp) Q9DB20
5493	pp	Q9D0M3 (pp) P62897
5494	pp	Q9D0M3 (pp) P70404
5495	pp	Q9D0M3 (pp) O09111
5496	pp	Q9D0M3 (pp) P97807
5497	pp	Q9D0M3 (pp) Q9D3D9
5498	pp	Q9D0M3 (pp) Q9ERS2
5499	pp	Q9D0M3 (pp) Q9CQZ6
5500	pp	Q9D0M3 (pp) Q9CQ69
5501	pp	Q9D0M3 (pp) P97450
5502	pp	Q9D0M3 (pp) Q06185
5503	pp	Q9D0M3 (pp) Q9WUM5
5504	pp	Q9D0M3 (pp) Q91VD9
5505	pp	Q9D0M3 (pp) P17751
5506	pp	Q9D0M3 (pp) Q9DB77
5507	pp	Q9D0M3 (pp) P19536
5508	pp	Q9D0M3 (pp) Q91VR2
5509	pp	Q9D0M3 (pp) P50516
5510	pp	Q9D0M3 (pp) Q9DCX2
5511	pp	Q9D0M3 (pp) Q9CR68
5512	pp	Q9D0M3 (pp) Q91YT0
5513	pp	Q9D0M3 (pp) Q9D6J6
5514	pp	Q9D0M3 (pp) P62073
5515	pp	Q9D0M3 (pp) Q8K3J1
5516	pp	Q9D0M3 (pp) Q64521
5517	pp	Q9D0M3 (pp) P56391
5518	pp	Q9D0M3 (pp) Q8VEM8
5519	pp	Q9D0M3 (pp) P42125
5520	pp	Q9D0M3 (pp) Q99LC3
5521	pp	Q9D0M3 (pp) Q99LX0
5522	pp	Q9D0M3 (pp) P43024
5523	pp	Q9D0M3 (pp) Q9DC69
5524	pp	Q9D0M3 (pp) Q9CQQ7
5525	pp	Q9D0M3 (pp) Q9D2G2
5526	pp	Q9D0M3 (pp) Q9DCJ5
5527	pp	Q9D0M3 (pp) P48771
5528	pp	Q9D0M3 (pp) Q9CZ13
5529	pp	Q9D0M3 (pp) Q9CQH3
5530	pp	Q9D0M3 (pp) Q9Z1P6
5531	pp	Q9D0M3 (pp) P00405
5532	pp	Q9D0M3 (pp) P19783
5533	pp	Q9D0M3 (pp) Q9CPP6
5534	pp	Q9D0M3 (pp) Q03265
5535	pp	Q9D0M3 (pp) O35658
5536	pp	Q9D0M3 (pp) P56480
5537	pp	Q99LC3 (pp) Q99LY9
5538	pp	Q99LC3 (pp) Q9Z1P6
5539	pp	Q99LC3 (pp) Q9DCJ5
5540	pp	Q99LC3 (pp) P50516
5541	pp	Q99LC3 (pp) O09111
5542	pp	Q99LC3 (pp) Q9D6J6
5543	pp	Q99LC3 (pp) Q9CQH3
5544	pp	Q99LC3 (pp) Q9DB77
5545	pp	Q99LC3 (pp) Q91YT0
5546	pp	Q99LC3 (pp) Q9CQ54
5547	pp	Q99LC3 (pp) Q9DCS9
5548	pp	Q99LC3 (pp) Q9CQ69
5549	pp	Q99LC3 (pp) Q9DC69
5550	pp	Q99LC3 (pp) Q9D3D9
5551	pp	Q99LC3 (pp) Q8K3J1
5552	pp	Q99LY9 (pp) Q9ERS2
5553	pp	Q99LY9 (pp) Q9CQH3
5554	pp	Q99LY9 (pp) Q9D6J6
5555	pp	Q8BMF4 (pp) Q05920
5556	pp	Q8BMF4 (pp) Q8BWT1
5557	pp	Q8BMF4 (pp) Q9D2G2
5558	pp	Q8BMF4 (pp) P63101
5559	pp	Q8BMF4 (pp) Q9WUM5
5560	pp	Q8BMF4 (pp) Q99JY0
5561	pp	Q8BMF4 (pp) Q922H2
5562	pp	Q05920 (pp) P06151
5563	pp	Q05920 (pp) P15105
5564	pp	P63085 (pp) P35438
5565	pp	P63085 (pp) Q64010
5566	pp	P63085 (pp) P07901
5567	pp	P61027 (pp) Q61598
5568	pp	Q61598 (pp) Q91VR2
5569	pp	Q61598 (pp) P63011
5570	pp	Q61598 (pp) Q99PT1
5571	pp	Q61598 (pp) P62821
5572	pp	P56480 (pp) P17742
5573	pp	P56480 (pp) Q9D2G2
5574	pp	P56480 (pp) P63038
5575	pp	P56480 (pp) P50516
5576	pp	P56480 (pp) P09103
5577	pp	P56480 (pp) Q9D3D9
5578	pp	P56480 (pp) Q60864
5579	pp	P56480 (pp) P03930
5580	pp	P56480 (pp) Q06185
5581	pp	P56480 (pp) Q99LX0
5582	pp	P56480 (pp) Q9WUM5
5583	pp	P56480 (pp) P17156
5584	pp	P56480 (pp) Q9CZ13
5585	pp	P56480 (pp) P19783
5586	pp	P56480 (pp) P62259
5587	pp	P56480 (pp) P00405
5588	pp	P56480 (pp) P56391
5589	pp	P56480 (pp) P15105
5590	pp	P56480 (pp) O35143
5591	pp	P56480 (pp) Q99LC3
5592	pp	P56480 (pp) Q8K3J1
5593	pp	P56480 (pp) P17182
5594	pp	P56480 (pp) Q9DCX2
5595	pp	P56480 (pp) Q8VEM8
5596	pp	P56480 (pp) Q91VR2
5597	pp	P56480 (pp) P16054
5598	pp	P56480 (pp) Q91VD9
5599	pp	P56480 (pp) Q9D6J6
5600	pp	P56480 (pp) Q9CQQ7
5601	pp	P56480 (pp) Q91YT0
5602	pp	P56480 (pp) Q9CR68
5603	pp	P56480 (pp) P97807
5604	pp	P56480 (pp) Q03265
5605	pp	P68404 (pp) P35438
5606	pp	P68404 (pp) P26645
5607	pp	P67778 (pp) P50516
5608	pp	Q9JLJ2 (pp) Q91VR2
5609	pp	Q9JLJ2 (pp) Q9EQ20
5610	pp	Q9JLJ2 (pp) Q61425
5611	pp	Q9JLJ2 (pp) Q8CHT0
5612	pp	Q9JLJ2 (pp) Q8BW75
5613	pp	Q9JLJ2 (pp) P61922
5614	pp	Q91VR2 (pp) O09111
5615	pp	Q91VR2 (pp) Q9CQH3
5616	pp	Q91VR2 (pp) Q9D6J6
5617	pp	Q9CPQ8 (pp) Q9CQH3
5618	pp	Q9CPQ8 (pp) Q9D6J6
5619	pp	Q91VD9 (pp) Q9ERS2
5620	pp	Q91VD9 (pp) Q9DC69
5621	pp	Q91VD9 (pp) Q91YT0
5622	pp	Q91VD9 (pp) Q99LY9
5623	pp	Q91VD9 (pp) Q3UIU2
5624	pp	Q91VD9 (pp) Q99LC5
5625	pp	Q91VD9 (pp) Q8K3J1
5626	pp	Q91VD9 (pp) Q9Z1P6
5627	pp	Q91VD9 (pp) Q8BMF4
5628	pp	Q91VD9 (pp) Q9DCJ5
5629	pp	Q91VD9 (pp) Q9CQ54
5630	pp	Q91VD9 (pp) Q9CQQ7
5631	pp	Q91VD9 (pp) P97807
5632	pp	Q91VD9 (pp) Q9DB77
5633	pp	Q91VD9 (pp) Q99LC3
5634	pp	Q91VD9 (pp) Q6PB66
5635	pp	Q91VD9 (pp) Q9DCS9
5636	pp	Q91VD9 (pp) Q9WUM5
5637	pp	Q91VD9 (pp) Q9CR68
5638	pp	Q91VD9 (pp) Q9CQH3
5639	pp	Q91VD9 (pp) Q91VR2
5640	pp	Q91VD9 (pp) Q9CQ69
5641	pp	Q91VD9 (pp) O09111
5642	pp	Q91VD9 (pp) Q9D2G2
5643	pp	Q91VD9 (pp) Q9CQZ6
5644	pp	Q91VD9 (pp) Q9D6J6
5645	pp	Q9DCS9 (pp) Q9CR68
5646	pp	Q9DCS9 (pp) Q9DC69
5647	pp	Q9DCS9 (pp) Q9CQQ7
5648	pp	Q9DCS9 (pp) Q06185
5649	pp	Q9DCS9 (pp) Q9CPQ8
5650	pp	Q9DCS9 (pp) Q9D3D9
5651	pp	Q9DCS9 (pp) Q9DCX2
5652	pp	Q9DCS9 (pp) Q9D6J6
5653	pp	Q9DCS9 (pp) Q9ERS2
5654	pp	Q9DCS9 (pp) Q9CQ69
5655	pp	Q9DCS9 (pp) Q8K3J1
5656	pp	Q9DCS9 (pp) Q9DCJ5
5657	pp	Q9DCS9 (pp) Q9CQH3
5658	pp	Q9DCS9 (pp) O09111
5659	pp	Q9CR68 (pp) P43024
5660	pp	Q9CR68 (pp) Q9D2G2
5661	pp	Q9CR68 (pp) Q06185
5662	pp	Q9CR68 (pp) Q9CQQ7
5663	pp	Q9CR68 (pp) Q8K3J1
5664	pp	Q9CR68 (pp) Q9DCJ5
5665	pp	Q9CR68 (pp) Q9WUM5
5666	pp	Q9CR68 (pp) Q9ERS2
5667	pp	Q9CR68 (pp) Q9D3D9
5668	pp	Q9CR68 (pp) P00405
5669	pp	Q9CR68 (pp) P56391
5670	pp	Q9CR68 (pp) Q9CQ69
5671	pp	Q9CR68 (pp) O88441
5672	pp	Q9CR68 (pp) P62897
5673	pp	Q9CR68 (pp) Q9D6J6
5674	pp	Q9CR68 (pp) Q9DC69
5675	pp	Q9CR68 (pp) O09111
5676	pp	Q9CR68 (pp) Q9DCX2
5677	pp	Q9CR68 (pp) Q8VEM8
5678	pp	Q9CR68 (pp) Q91VR2
5679	pp	Q9CR68 (pp) Q9CQH3
5680	pp	Q9CR68 (pp) O35658
5681	pp	P05132 (pp) P12367
5682	pp	P05132 (pp) P31324
5683	pp	P05132 (pp) P35438
5684	pp	Q9CQJ8 (pp) Q06185
5685	pp	Q9CQJ8 (pp) P19783
5686	pp	Q9CQJ8 (pp) Q9DB77
5687	pp	Q9CQJ8 (pp) Q9Z1P6
5688	pp	Q9CQJ8 (pp) Q9DC69
5689	pp	Q9CQJ8 (pp) O09111
5690	pp	Q9CQJ8 (pp) Q9DB20
5691	pp	Q9CQJ8 (pp) Q9CQ69
5692	pp	Q9CQJ8 (pp) Q9DCJ5
5693	pp	Q9CQJ8 (pp) P48771
5694	pp	Q9CQJ8 (pp) Q9D0M3
5695	pp	Q9CQJ8 (pp) Q9D6J6
5696	pp	Q9CQJ8 (pp) Q9CQ54
5697	pp	Q9CQJ8 (pp) P97450
5698	pp	Q9CQJ8 (pp) Q9CZ13
5699	pp	Q9CQJ8 (pp) P97807
5700	pp	Q9CQJ8 (pp) Q9D023
5701	pp	Q9CQJ8 (pp) Q9CQZ6
5702	pp	Q9CQJ8 (pp) Q9ERS2
5703	pp	Q9CQJ8 (pp) Q99KI0
5704	pp	Q9CQJ8 (pp) Q91YT0
5705	pp	Q9CQJ8 (pp) Q99LC3
5706	pp	Q9CQJ8 (pp) Q9CPP6
5707	pp	Q9CQJ8 (pp) Q9CPQ8
5708	pp	Q9CQJ8 (pp) P43024
5709	pp	Q9CQJ8 (pp) Q9CQC7
5710	pp	Q9CQJ8 (pp) Q8K1Z0
5711	pp	Q9CQJ8 (pp) Q9CQZ5
5712	pp	Q9CQJ8 (pp) Q99LC5
5713	pp	Q9CQJ8 (pp) Q8VEM8
5714	pp	Q9CQJ8 (pp) Q03265
5715	pp	Q9CQJ8 (pp) Q62425
5716	pp	Q9CQJ8 (pp) Q9CR68
5717	pp	Q9CQJ8 (pp) Q9CQH3
5718	pp	Q9CQJ8 (pp) Q99LY9
5719	pp	Q9CQJ8 (pp) Q8K3J1
5720	pp	Q9CQJ8 (pp) Q9DCX2
5721	pp	Q9CQJ8 (pp) Q91VR2
5722	pp	Q9CQJ8 (pp) Q9D6J5
5723	pp	Q9CQJ8 (pp) Q91VD9
5724	pp	Q9CQJ8 (pp) Q9D3D9
5725	pp	Q9CQJ8 (pp) P99029
5726	pp	Q9CQJ8 (pp) P62073
5727	pp	Q9CQJ8 (pp) Q9DCS9
5728	pp	Q9CQJ8 (pp) Q9CQQ7
5729	pp	Q06185 (pp) Q99LY9
5730	pp	Q06185 (pp) Q9D6J6
5731	pp	Q06185 (pp) Q9CQH3
5732	pp	Q06185 (pp) P56391
5733	pp	Q06185 (pp) Q9DCJ5
5734	pp	Q06185 (pp) Q9CQ69
5735	pp	Q06185 (pp) O09111
5736	pp	Q06185 (pp) Q8K3J1
5737	pp	Q06185 (pp) Q91VR2
5738	pp	Q06185 (pp) Q9D3D9
5739	pp	Q06185 (pp) Q9ERS2
5740	pp	Q06185 (pp) Q9CQQ7
5741	pp	Q06185 (pp) Q9DCX2
5742	pp	Q06185 (pp) P03930
5743	pp	Q9DC70 (pp) Q9D0S9
5744	pp	Q9DC70 (pp) Q03265
5745	pp	Q9DC70 (pp) Q9CQZ5
5746	pp	Q9DC70 (pp) Q8K2B3
5747	pp	Q9DC70 (pp) P62073
5748	pp	Q9DC70 (pp) Q9Z1P6
5749	pp	Q9DC70 (pp) P42125
5750	pp	Q9DC70 (pp) Q9CQH3
5751	pp	Q9DC70 (pp) P56391
5752	pp	Q9DC70 (pp) P52503
5753	pp	Q9DC70 (pp) P97450
5754	pp	Q9DC70 (pp) Q99LC3
5755	pp	Q9DC70 (pp) Q99KI0
5756	pp	Q9DC70 (pp) P17751
5757	pp	Q9DC70 (pp) Q9D0M3
5758	pp	Q9DC70 (pp) Q9DCJ5
5759	pp	Q9DC70 (pp) Q9DCX2
5760	pp	Q9DC70 (pp) Q9D855
5761	pp	Q9DC70 (pp) Q9DB20
5762	pp	Q9DC70 (pp) Q3UIU2
5763	pp	Q9DC70 (pp) Q9CR68
5764	pp	Q9DC70 (pp) Q91YT0
5765	pp	Q9DC70 (pp) Q9CPP6
5766	pp	Q9DC70 (pp) P56480
5767	pp	Q9DC70 (pp) P70404
5768	pp	Q9DC70 (pp) Q9ERS2
5769	pp	Q9DC70 (pp) Q9CQJ8
5770	pp	Q9DC70 (pp) Q8K3J1
5771	pp	Q9DC70 (pp) Q9CQ69
5772	pp	Q9DC70 (pp) O09111
5773	pp	Q9DC70 (pp) O08756
5774	pp	Q9DC70 (pp) Q9D3D9
5775	pp	Q9DC70 (pp) Q9DCS9
5776	pp	Q9DC70 (pp) Q91VR2
5777	pp	Q9DC70 (pp) Q91Z53
5778	pp	Q9DC70 (pp) P19783
5779	pp	Q9DC70 (pp) Q91VD9
5780	pp	Q9DC70 (pp) Q91VT4
5781	pp	Q9DC70 (pp) Q9CZ13
5782	pp	Q9DC70 (pp) Q9D6J6
5783	pp	Q9DC70 (pp) Q06185
5784	pp	Q9DC70 (pp) Q9CXZ1
5785	pp	Q9DC70 (pp) Q9DC69
5786	pp	Q9D0S9 (pp) Q91Z53
5787	pp	Q9D0S9 (pp) O08756
5788	pp	Q9D1K2 (pp) Q9Z1G4
5789	pp	Q9D1K2 (pp) P62814
5790	pp	Q9D1K2 (pp) P63082
5791	pp	Q9D1K2 (pp) Q8K3J1
5792	pp	Q9D1K2 (pp) Q9Z1G3
5793	pp	Q9D1K2 (pp) Q9WTT4
5794	pp	Q9D1K2 (pp) Q9CQZ5
5795	pp	Q9D1K2 (pp) P51863
5796	pp	Q9D1K2 (pp) Q9CQ75
5797	pp	Q9D1K2 (pp) P50516
5798	pp	Q9D1K2 (pp) Q91VM9
5799	pp	Q9D1K2 (pp) Q9Z1P6
5800	pp	Q9D1K2 (pp) Q8BVE3
5801	pp	Q9D1K2 (pp) P57746
5802	pp	Q9D1K2 (pp) P50518
5803	pp	Q9Z1G4 (pp) P50516
5804	pp	Q9Z1G4 (pp) Q9WTT4
5805	pp	Q9Z1G4 (pp) P63082
5806	pp	Q9Z1G4 (pp) Q62277
5807	pp	Q9WUM5 (pp) Q9D0K2
5808	pp	Q9WUM5 (pp) Q9DC69
5809	pp	Q9WUM5 (pp) Q9CQQ7
5810	pp	Q9WUM5 (pp) Q9DCJ5
5811	pp	Q9WUM5 (pp) P06151
5812	pp	Q9WUM5 (pp) Q9D6J6
5813	pp	Q9WUM5 (pp) Q91VR2
5814	pp	Q9WUM5 (pp) Q99JY0
5815	pp	Q9WUM5 (pp) Q60597
5816	pp	Q9WUM5 (pp) Q99LX0
5817	pp	Q9WUM5 (pp) Q9ERS2
5818	pp	Q9WUM5 (pp) Q9CQH3
5819	pp	Q9WUM5 (pp) Q60931
5820	pp	Q9WUM5 (pp) Q8VEM8
5821	pp	Q9CQN1 (pp) P63037
5822	pp	Q9CQN1 (pp) Q8K3J1
5823	pp	Q9CQN1 (pp) Q91YT0
5824	pp	Q9CQN1 (pp) P63038
5825	pp	P63037 (pp) Q91VR2
5826	pp	P63037 (pp) Q61699
5827	pp	Q9DCW4 (pp) Q9CPP6
5828	pp	Q9DCW4 (pp) Q9DCJ5
5829	pp	Q9DCW4 (pp) P56391
5830	pp	Q9DCW4 (pp) P51174
5831	pp	Q9DCW4 (pp) Q9DB20
5832	pp	Q9DCW4 (pp) Q9D3D9
5833	pp	Q9DCW4 (pp) Q8JZN5
5834	pp	Q9DCW4 (pp) Q9CQA3
5835	pp	Q9DCW4 (pp) Q9Z2I9
5836	pp	Q9DCW4 (pp) Q06185
5837	pp	Q9DCW4 (pp) O09111
5838	pp	Q9DCW4 (pp) Q9D6J5
5839	pp	Q9DCW4 (pp) Q91YT0
5840	pp	Q9DCW4 (pp) Q9ERS2
5841	pp	Q9DCW4 (pp) Q8BMS1
5842	pp	Q9DCW4 (pp) Q8K3J1
5843	pp	Q9DCW4 (pp) P08249
5844	pp	Q9DCW4 (pp) P17751
5845	pp	Q9DCW4 (pp) Q91Z53
5846	pp	Q9DCW4 (pp) Q9WUM5
5847	pp	Q9DCW4 (pp) P42125
5848	pp	Q9DCW4 (pp) Q9DBL1
5849	pp	Q9DCW4 (pp) Q921G7
5850	pp	Q9DCW4 (pp) Q99LC3
5851	pp	Q9DCW4 (pp) Q80U28
5852	pp	Q9DCW4 (pp) P19783
5853	pp	Q9DCW4 (pp) Q9DC69
5854	pp	Q9DCW4 (pp) Q99LC5
5855	pp	Q9DCW4 (pp) P52503
5856	pp	Q9DCW4 (pp) Q9CQJ8
5857	pp	Q9DCW4 (pp) Q8BH95
5858	pp	Q9DCW4 (pp) Q9DCT2
5859	pp	Q9DCW4 (pp) Q9JHI5
5860	pp	Q9DCW4 (pp) O08756
5861	pp	Q9DCW4 (pp) Q8BWT1
5862	pp	Q9DCW4 (pp) Q9DCS9
5863	pp	Q9DCW4 (pp) Q61425
5864	pp	Q9DCW4 (pp) Q9Z1P6
5865	pp	Q9DCW4 (pp) Q9D6J6
5866	pp	Q9DCW4 (pp) Q9D0S9
5867	pp	Q9DCW4 (pp) Q8QZT1
5868	pp	Q9DCW4 (pp) Q9DC70
5869	pp	Q9DCW4 (pp) Q8R4N0
5870	pp	Q9DCW4 (pp) P50544
5871	pp	Q9CPP6 (pp) Q9D6J6
5872	pp	Q9CPP6 (pp) Q9DB77
5873	pp	Q9CPP6 (pp) Q9DCX2
5874	pp	Q9CPP6 (pp) P48771
5875	pp	Q9CPP6 (pp) Q9DCJ5
5876	pp	Q9CPP6 (pp) Q99LY9
5877	pp	Q9CPP6 (pp) Q9ERS2
5878	pp	Q9CPP6 (pp) Q9CQZ6
5879	pp	Q9CPP6 (pp) Q91VD9
5880	pp	Q9CPP6 (pp) Q8K3J1
5881	pp	Q9CPP6 (pp) Q9CQ69
5882	pp	Q9CPP6 (pp) Q99LC5
5883	pp	Q9CPP6 (pp) Q9D6J5
5884	pp	Q9CPP6 (pp) Q9CQH3
5885	pp	Q9CPP6 (pp) Q9WUM5
5886	pp	Q9CPP6 (pp) Q9Z1P6
5887	pp	Q9CPP6 (pp) P56391
5888	pp	Q9CPP6 (pp) P43024
5889	pp	Q9CPP6 (pp) Q91YT0
5890	pp	P46460 (pp) Q01097
5891	pp	P46460 (pp) Q9CWZ7
5892	pp	P46460 (pp) Q62442
5893	pp	P46460 (pp) O08599
5894	pp	P46460 (pp) O35526
5895	pp	P46460 (pp) P35438
5896	pp	P46460 (pp) P23819
5897	pp	P46460 (pp) P63101
5898	pp	Q08331 (pp) Q9CQ62
5899	pp	Q08331 (pp) Q01097
5900	pp	Q9CQ62 (pp) Q99JY0
5901	pp	Q9CQ62 (pp) Q8BWT1
5902	pp	Q9CQ62 (pp) Q99LC5
5903	pp	Q9CQ62 (pp) P19096
5904	pp	Q9CQ62 (pp) P41216
5905	pp	Q9D2G2 (pp) Q91VR2
5906	pp	Q9D2G2 (pp) Q9WUM5
5907	pp	Q9D2G2 (pp) Q60597
5908	pp	Q9D2G2 (pp) Q9D3D9
5909	pp	Q3UIU2 (pp) Q9D6J6
5910	pp	Q3UIU2 (pp) Q9CQH3
5911	pp	P31938 (pp) P63085
5912	pp	P31938 (pp) P35438
5913	pp	P31938 (pp) P16054
5914	pp	P17427 (pp) P17426
5915	pp	P17427 (pp) Q68FD5
5916	pp	P17427 (pp) O08585
5917	pp	P17427 (pp) Q80VP1
5918	pp	P17427 (pp) P62743
5919	pp	P17427 (pp) P39053
5920	pp	P17427 (pp) Q8CHC4
5921	pp	P17427 (pp) Q6IRU5
5922	pp	P17427 (pp) P84091
5923	pp	P17427 (pp) Q9DBG3
5924	pp	P17426 (pp) P62743
5925	pp	P17426 (pp) O08585
5926	pp	P17426 (pp) Q80VP1
5927	pp	P17426 (pp) Q8CHC4
5928	pp	P57746 (pp) P50516
5929	pp	P57746 (pp) Q8BVE3
5930	pp	P57746 (pp) Q9Z1G4
5931	pp	P57746 (pp) Q9CQZ6
5932	pp	P57746 (pp) P97450
5933	pp	P57746 (pp) Q9Z1G3
5934	pp	P57746 (pp) Q9WTT4
5935	pp	P57746 (pp) P23506
5936	pp	P57746 (pp) P63082
5937	pp	P57746 (pp) Q9CQH3
5938	pp	P50516 (pp) Q9JHU4
5939	pp	P50516 (pp) Q9R0K7
5940	pp	P50516 (pp) Q8BPN8
5941	pp	P50516 (pp) P60710
5942	pp	P50516 (pp) Q7TPR4
5943	pp	P50516 (pp) P39053
5944	pp	P50516 (pp) Q7TQF7
5945	pp	P50516 (pp) P53395
5946	pp	P50516 (pp) P55088
5947	pp	P50516 (pp) Q9D6J6
5948	pp	P50516 (pp) P46460
5949	pp	P50516 (pp) P46660
5950	pp	P50516 (pp) Q9QYR6
5951	pp	P50516 (pp) P01831
5952	pp	P50516 (pp) P28660
5953	pp	P50516 (pp) Q9D6R2
5954	pp	P50516 (pp) P47754
5955	pp	P50516 (pp) Q5SQX6
5956	pp	P50516 (pp) Q5DQR4
5957	pp	P50516 (pp) O35643
5958	pp	P50516 (pp) Q9Z2I0
5959	pp	P50516 (pp) Q62425
5960	pp	P50516 (pp) P63082
5961	pp	P50516 (pp) O08539
5962	pp	P50516 (pp) Q9JLM8
5963	pp	P50516 (pp) Q8VD37
5964	pp	P50516 (pp) P17427
5965	pp	P50516 (pp) Q99LX0
5966	pp	P50516 (pp) Q80XN0
5967	pp	P50516 (pp) O54983
5968	pp	P50516 (pp) P17426
5969	pp	P50516 (pp) Q9Z0E0
5970	pp	P50516 (pp) Q9Z1J3
5971	pp	P50516 (pp) Q3UHL1
5972	pp	P50516 (pp) Q91VR2
5973	pp	P50516 (pp) P12382
5974	pp	P50516 (pp) P08553
5975	pp	P70404 (pp) Q91VR2
5976	pp	P70404 (pp) Q9WUM5
5977	pp	P70404 (pp) Q9DC69
5978	pp	P70404 (pp) Q60597
5979	pp	P70404 (pp) Q9D2G2
5980	pp	O88441 (pp) Q9D6J6
5981	pp	O88441 (pp) Q9CQH3
5982	pp	O88441 (pp) Q6PB66
5983	pp	Q7TQI3 (pp) P68510
5984	pp	P17751 (pp) P06745
5985	pp	P17751 (pp) P05063
5986	pp	P17751 (pp) P17182
5987	pp	P17751 (pp) Q99LX0
5988	pp	P17751 (pp) P09411
5989	pp	P17751 (pp) Q93092
5990	pp	P17751 (pp) Q9CZ13
5991	pp	P17751 (pp) Q9D6J6
5992	pp	P17751 (pp) P56480
5993	pp	P17751 (pp) Q91VD9
5994	pp	P17751 (pp) P70296
5995	pp	P17751 (pp) Q9D2G2
5996	pp	P17751 (pp) Q64521
5997	pp	P17751 (pp) P47857
5998	pp	P17751 (pp) P16858
5999	pp	P17751 (pp) Q9WUM5
6000	pp	P17751 (pp) P23506
6001	pp	P17751 (pp) P99029
6002	pp	P17751 (pp) Q8K3J1
6003	pp	P17751 (pp) P97807
6004	pp	P17751 (pp) Q03265
6005	pp	P17751 (pp) P05064
6006	pp	P17751 (pp) Q9CR68
6007	pp	P17751 (pp) Q9WUA3
6008	pp	P17751 (pp) Q91VR2
6009	pp	P17751 (pp) P63101
6010	pp	P17751 (pp) P52480
6011	pp	P17751 (pp) P06151
6012	pp	P17751 (pp) Q9R0P5
6013	pp	P17751 (pp) Q91YT0
6014	pp	P09411 (pp) Q9DCD0
6015	pp	P09411 (pp) P17182
6016	pp	P09411 (pp) P17742
6017	pp	P09411 (pp) P16858
6018	pp	P09411 (pp) P06151
6019	pp	Q9Z1P6 (pp) Q9D6J6
6020	pp	Q9Z1P6 (pp) Q9ERS2
6021	pp	Q9Z1P6 (pp) P56391
6022	pp	Q9Z1P6 (pp) Q3UIU2
6023	pp	Q9Z1P6 (pp) Q9D3D9
6024	pp	Q9Z1P6 (pp) Q9DC69
6025	pp	Q9Z1P6 (pp) Q9CPQ8
6026	pp	Q9Z1P6 (pp) Q99LX0
6027	pp	Q9Z1P6 (pp) Q9CQ69
6028	pp	Q9Z1P6 (pp) Q9CQH3
6029	pp	Q9Z1P6 (pp) Q9DCJ5
6030	pp	Q9Z1P6 (pp) Q8K3J1
6031	pp	Q9Z1P6 (pp) Q06185
6032	pp	Q9Z1P6 (pp) O08756
6033	pp	Q9Z1P6 (pp) Q9DCS9
6034	pp	Q9Z1P6 (pp) Q91YT0
6035	pp	Q9Z1P6 (pp) Q9DCX2
6036	pp	Q9Z1P6 (pp) O09111
6037	pp	P63137 (pp) P62812
6038	pp	P62812 (pp) P63328
6039	pp	P62812 (pp) P22723
6040	pp	O70325 (pp) Q99LX0
6041	pp	O70325 (pp) Q9D3D9
6042	pp	O70325 (pp) Q9ERS2
6043	pp	O70325 (pp) P99029
6044	pp	P48771 (pp) Q9DC69
6045	pp	P48771 (pp) Q91VR2
6046	pp	P48771 (pp) P56391
6047	pp	P48771 (pp) Q99LX0
6048	pp	P48771 (pp) Q06185
6049	pp	P48771 (pp) Q9D6J6
6050	pp	P48771 (pp) Q9CQH3
6051	pp	P48771 (pp) Q9CQ69
6052	pp	P48771 (pp) P43024
6053	pp	Q64133 (pp) P47738
6054	pp	Q64133 (pp) Q9JLJ2
6055	pp	Q64133 (pp) Q9CZS1
6056	pp	Q64133 (pp) Q9DBF1
6057	pp	P47738 (pp) P61922
6058	pp	P47738 (pp) Q8CHT0
6059	pp	P47738 (pp) Q9EQ20
6060	pp	P47738 (pp) Q8BW75
6061	pp	P63005 (pp) Q6PER3
6062	pp	P63005 (pp) O08788
6063	pp	P63005 (pp) Q99KJ8
6064	pp	P63005 (pp) P20357
6065	pp	Q6PER3 (pp) O08788
6066	pp	O70161 (pp) Q9Z1B3
6067	pp	O70161 (pp) P17426
6068	pp	O70161 (pp) Q71LX4
6069	pp	Q9Z1B3 (pp) Q01097
6070	pp	Q9Z1B3 (pp) P35438
6071	pp	Q921G7 (pp) Q8BWT1
6072	pp	Q921G7 (pp) Q61425
6073	pp	Q921G7 (pp) Q8BMS1
6074	pp	Q921G7 (pp) Q9D6J6
6075	pp	Q921G7 (pp) Q99JY0
6076	pp	Q921G7 (pp) Q9WUM5
6077	pp	Q921G7 (pp) Q80U28
6078	pp	Q921G7 (pp) Q9CQ62
6079	pp	Q921G7 (pp) Q99LC5
6080	pp	Q8BWT1 (pp) Q9D0K2
6081	pp	Q8BWT1 (pp) Q9DBL1
6082	pp	Q8BWT1 (pp) Q9EQ20
6083	pp	Q8BWT1 (pp) Q99JY0
6084	pp	Q8BWT1 (pp) Q8BMS1
6085	pp	Q8BWT1 (pp) Q9WUM5
6086	pp	Q8BWT1 (pp) O08756
6087	pp	Q8BWT1 (pp) Q91ZA3
6088	pp	Q9CQA3 (pp) Q9D0M3
6089	pp	Q9CQA3 (pp) Q9CZ13
6090	pp	Q9CQA3 (pp) Q06185
6091	pp	Q9CQA3 (pp) Q8K3J1
6092	pp	Q9CQA3 (pp) Q9Z2I9
6093	pp	Q9CQA3 (pp) Q9Z1P6
6094	pp	Q9CQA3 (pp) Q9DCS9
6095	pp	Q9CQA3 (pp) Q9CQZ6
6096	pp	Q9CQA3 (pp) Q9D2G2
6097	pp	Q9CQA3 (pp) Q9DCJ5
6098	pp	Q9CQA3 (pp) P54071
6099	pp	Q9CQA3 (pp) Q99KI0
6100	pp	Q9CQA3 (pp) Q9CQ62
6101	pp	Q9CQA3 (pp) Q9DB20
6102	pp	Q9CQA3 (pp) Q9D855
6103	pp	Q9CQA3 (pp) P97807
6104	pp	Q9CQA3 (pp) P70404
6105	pp	Q9CQA3 (pp) Q9CPQ1
6106	pp	Q9CQA3 (pp) Q9CQH3
6107	pp	Q9CQA3 (pp) P52503
6108	pp	Q9CQA3 (pp) Q9DC69
6109	pp	Q9CQA3 (pp) Q9WUM5
6110	pp	Q9CQA3 (pp) Q9D6J5
6111	pp	Q9CQA3 (pp) P56391
6112	pp	Q9CQA3 (pp) Q9DB77
6113	pp	Q9CQA3 (pp) Q9CQ75
6114	pp	Q9CQA3 (pp) Q8K2B3
6115	pp	Q9CQA3 (pp) Q9CR68
6116	pp	Q9CQA3 (pp) Q91VD9
6117	pp	Q9CQA3 (pp) Q9D6J6
6118	pp	Q9CQA3 (pp) P20108
6119	pp	Q9CQA3 (pp) Q9CQZ5
6120	pp	Q9CQA3 (pp) Q99LC5
6121	pp	Q9CQA3 (pp) Q9CQQ7
6122	pp	Q9CQA3 (pp) Q7TMF3
6123	pp	Q9CQA3 (pp) Q03265
6124	pp	Q9CQA3 (pp) Q91VR2
6125	pp	Q9CQA3 (pp) Q61425
6126	pp	Q9CQA3 (pp) Q64521
6127	pp	Q9CQA3 (pp) Q8VEM8
6128	pp	Q9CQA3 (pp) Q91YT0
6129	pp	Q9CQA3 (pp) Q9DCX2
6130	pp	Q9CQA3 (pp) P56480
6131	pp	Q9CQA3 (pp) P97450
6132	pp	Q9CQA3 (pp) Q9DCD0
6133	pp	Q9CQA3 (pp) Q9CPP6
6134	pp	Q9CQA3 (pp) Q91WD5
6135	pp	Q9CQA3 (pp) P19783
6136	pp	Q9CQA3 (pp) Q9D6R2
6137	pp	Q9CQA3 (pp) Q9DC70
6138	pp	Q9CQA3 (pp) Q9CQ69
6139	pp	Q9CQA3 (pp) P17751
6140	pp	Q9CQA3 (pp) P43024
6141	pp	Q9CQA3 (pp) O09111
6142	pp	Q9CQA3 (pp) Q9D3D9
6143	pp	Q9CQA3 (pp) Q99LX0
6144	pp	Q9CQA3 (pp) P19536
6145	pp	Q9CQA3 (pp) P99029
6146	pp	Q9CQA3 (pp) Q9ERS2
6147	pp	Q9CQA3 (pp) Q9CQJ8
6148	pp	Q9CQA3 (pp) P08249
6149	pp	Q9CQA3 (pp) Q60597
6150	pp	P12787 (pp) Q9CR68
6151	pp	P12787 (pp) P52503
6152	pp	P12787 (pp) Q9D6R2
6153	pp	P12787 (pp) Q9DCS9
6154	pp	P12787 (pp) Q99LC5
6155	pp	P12787 (pp) Q9D3D9
6156	pp	P12787 (pp) Q8K3J1
6157	pp	P12787 (pp) Q7TMF3
6158	pp	P12787 (pp) Q8VEM8
6159	pp	P12787 (pp) P17665
6160	pp	P12787 (pp) Q9DC69
6161	pp	P12787 (pp) Q9DCW4
6162	pp	P12787 (pp) P97450
6163	pp	P12787 (pp) Q9DCT2
6164	pp	P12787 (pp) P56391
6165	pp	P12787 (pp) Q9ERS2
6166	pp	P12787 (pp) P19783
6167	pp	P12787 (pp) Q9CQQ7
6168	pp	P12787 (pp) Q9D6J6
6169	pp	P12787 (pp) Q9DB20
6170	pp	P12787 (pp) P00405
6171	pp	P12787 (pp) Q9CQZ5
6172	pp	P12787 (pp) Q9DCJ5
6173	pp	P12787 (pp) Q9D0M3
6174	pp	P12787 (pp) Q9D6J5
6175	pp	P12787 (pp) Q9CQ69
6176	pp	P12787 (pp) Q9CQJ8
6177	pp	P12787 (pp) Q9CPQ1
6178	pp	P12787 (pp) Q9DC70
6179	pp	P12787 (pp) Q9CQ54
6180	pp	P12787 (pp) Q91VR2
6181	pp	P12787 (pp) Q99LC3
6182	pp	P12787 (pp) Q9DCX2
6183	pp	P12787 (pp) Q9CQH3
6184	pp	P12787 (pp) P09671
6185	pp	P12787 (pp) Q03265
6186	pp	P12787 (pp) Q9D855
6187	pp	P12787 (pp) Q9CQA3
6188	pp	P12787 (pp) Q9DB77
6189	pp	P12787 (pp) P43024
6190	pp	P12787 (pp) P19536
6191	pp	P12787 (pp) Q9CQZ6
6192	pp	P12787 (pp) Q9CXZ1
6193	pp	P12787 (pp) Q06185
6194	pp	P12787 (pp) P56480
6195	pp	Q61425 (pp) Q99LC5
6196	pp	Q61425 (pp) Q9WUM5
6197	pp	Q61425 (pp) Q9DBL1
6198	pp	Q61425 (pp) Q9D0K2
6199	pp	Q61425 (pp) Q9CZS1
6200	pp	Q61425 (pp) Q8BMS1
6201	pp	Q61425 (pp) Q9CQ62
6202	pp	Q61425 (pp) Q8BWT1
6203	pp	Q61425 (pp) Q99JY0
6204	pp	Q61425 (pp) O08756
6205	pp	Q61425 (pp) P47738
6206	pp	Q61425 (pp) Q8QZT1
6207	pp	Q61425 (pp) Q9EQ20
6208	pp	Q99LC5 (pp) O09111
6209	pp	Q99LC5 (pp) P50544
6210	pp	Q99LC5 (pp) Q9D6J6
6211	pp	Q99LC5 (pp) Q9DCJ5
6212	pp	Q99LC5 (pp) Q6PB66
6213	pp	Q99LC5 (pp) Q91ZJ5
6214	pp	Q99LC5 (pp) Q9CQH3
6215	pp	Q99LC5 (pp) Q80U28
6216	pp	Q99LC5 (pp) Q91VR2
6217	pp	Q99LC5 (pp) Q9DBL1
6218	pp	Q99LC5 (pp) Q99JY0
6219	pp	Q99LC5 (pp) O08756
6220	pp	Q99LC5 (pp) Q91YT0
6221	pp	Q99LC5 (pp) Q9Z0X1
6222	pp	Q99LC5 (pp) Q8BWT1
6223	pp	Q99LC5 (pp) Q9WUM5
6224	pp	Q99LC5 (pp) Q9CR68
6225	pp	Q99LC5 (pp) O88441
6226	pp	Q99LC5 (pp) Q9DC69
6227	pp	Q8BGH2 (pp) Q99LX0
6228	pp	Q8BGH2 (pp) Q8BH95
6229	pp	Q8BGH2 (pp) Q8CAQ8
6230	pp	Q8BGH2 (pp) Q9CZ13
6231	pp	Q8BGH2 (pp) Q9DC69
6232	pp	Q8BGH2 (pp) Q9QYA2
6233	pp	Q8BGH2 (pp) O88441
6234	pp	Q8BGH2 (pp) P97807
6235	pp	Q8BGH2 (pp) Q9CRB9
6236	pp	Q8BGH2 (pp) Q9DCJ5
6237	pp	Q8BGH2 (pp) Q9WUM5
6238	pp	Q8BGH2 (pp) Q91YT0
6239	pp	Q99LX0 (pp) Q62277
6240	pp	Q99LX0 (pp) O09111
6241	pp	Q99LX0 (pp) Q9D6J6
6242	pp	Q99LX0 (pp) O55042
6243	pp	Q99LX0 (pp) O08756
6244	pp	Q99LX0 (pp) Q91VR2
6245	pp	Q99LX0 (pp) Q9CQH3
6246	pp	P62331 (pp) O70161
6247	pp	Q8K1Z0 (pp) Q9DCJ5
6248	pp	Q8K1Z0 (pp) Q9WUM5
6249	pp	Q8K1Z0 (pp) Q9D6J6
6250	pp	Q8K1Z0 (pp) Q9ERS2
6251	pp	P11499 (pp) P62259
6252	pp	P11499 (pp) Q60864
6253	pp	P11499 (pp) P63038
6254	pp	P11499 (pp) P63037
6255	pp	P11499 (pp) P60710
6256	pp	P11499 (pp) Q9CR16
6257	pp	P05064 (pp) P17710
6258	pp	P05064 (pp) Q9WUA3
6259	pp	P05064 (pp) P17182
6260	pp	P05064 (pp) Q61735
6261	pp	P05064 (pp) P05063
6262	pp	P17710 (pp) Q9WUA3
6263	pp	P48320 (pp) P61922
6264	pp	P48320 (pp) P15105
6265	pp	P61922 (pp) Q9DBF1
6266	pp	P61922 (pp) P15105
6267	pp	P61922 (pp) Q9EQ20
6268	pp	P12023 (pp) P46460
6269	pp	P12023 (pp) Q9WV18
6270	pp	P12023 (pp) P04925
6271	pp	P12023 (pp) P63044
6272	pp	P12023 (pp) P62823
6273	pp	P12023 (pp) Q9CZT8
6274	pp	P12023 (pp) P06837
6275	pp	P12023 (pp) P63011
6276	pp	P12023 (pp) O35526
6277	pp	P12023 (pp) O08756
6278	pp	P12023 (pp) P68254
6279	pp	P12023 (pp) Q8VDN2
6280	pp	P12023 (pp) Q9JHU4
6281	pp	P12023 (pp) Q62277
6282	pp	P12023 (pp) Q9Z1G3
6283	pp	P12023 (pp) Q810U3
6284	pp	P12023 (pp) P62259
6285	pp	P12023 (pp) Q9D6F9
6286	pp	P12023 (pp) Q61548
6287	pp	P12023 (pp) Q60932
6288	pp	P12023 (pp) P35564
6289	pp	P12023 (pp) P56564
6290	pp	P12023 (pp) Q64332
6291	pp	P12023 (pp) O88935
6292	pp	P12023 (pp) P07901
6293	pp	P12023 (pp) P61982
6294	pp	P12023 (pp) O88737
6295	pp	P12023 (pp) P13595
6296	pp	P12023 (pp) Q9JIS5
6297	pp	P12023 (pp) P63101
6298	pp	P12023 (pp) P60710
6299	pp	P12023 (pp) P68510
6300	pp	P12023 (pp) O08599
6301	pp	P12023 (pp) P39053
6302	pp	P12023 (pp) P12960
6303	pp	P12023 (pp) P08551
6304	pp	P12023 (pp) P62821
6305	pp	P12023 (pp) P46096
6306	pp	P12023 (pp) P57780
6307	pp	P12023 (pp) Q91ZZ3
6308	pp	P12023 (pp) P28652
6309	pp	P12023 (pp) O54991
6310	pp	P12023 (pp) Q812A2
6311	pp	P12023 (pp) P46660
6312	pp	P12023 (pp) P60879
6313	pp	P12023 (pp) O55042
6314	pp	P12023 (pp) P97300
6315	pp	P12023 (pp) Q62420
6316	pp	P12023 (pp) P01831
6317	pp	P12023 (pp) Q68FD5
6318	pp	P12023 (pp) Q9Z1G4
6319	pp	P12023 (pp) Q9CQV8
6320	pp	P12023 (pp) Q61316
6321	pp	P12023 (pp) P11627
6322	pp	P12023 (pp) P63017
6323	pp	P12023 (pp) P61264
6324	pp	P62814 (pp) P51863
6325	pp	P62814 (pp) P50516
6326	pp	P62814 (pp) Q8BVE3
6327	pp	P62814 (pp) P57746
6328	pp	P62814 (pp) Q9DC69
6329	pp	P62814 (pp) Q9Z1G3
6330	pp	P62814 (pp) P63082
6331	pp	P62814 (pp) Q91VM9
6332	pp	P62814 (pp) P50518
6333	pp	P62814 (pp) Q9WTT4
6334	pp	P62814 (pp) Q9Z1G4
6335	pp	Q9WV92 (pp) Q8R5M8
6336	pp	Q9WV92 (pp) P12023
6337	pp	Q8R5M8 (pp) O70589
6338	pp	O35526 (pp) Q62442
6339	pp	O35526 (pp) P63040
6340	pp	O35526 (pp) P60879
6341	pp	O35526 (pp) O08599
6342	pp	Q9WV18 (pp) Q80T41
6343	pp	P56391 (pp) O09111
6344	pp	P56391 (pp) Q9D3D9
6345	pp	P56391 (pp) Q9ERS2
6346	pp	P56391 (pp) P00405
6347	pp	P56391 (pp) P17665
6348	pp	P56391 (pp) Q9DCX2
6349	pp	Q9D172 (pp) Q9CQH3
6350	pp	Q9D172 (pp) P97807
6351	pp	Q9D172 (pp) Q91YT0
6352	pp	Q9D172 (pp) Q9CQZ5
6353	pp	Q9D172 (pp) Q9DCT2
6354	pp	Q9D172 (pp) Q9CZ13
6355	pp	Q9D172 (pp) Q91WD5
6356	pp	Q9D172 (pp) Q8BH95
6357	pp	Q9D172 (pp) Q9DCJ5
6358	pp	Q9D172 (pp) P42125
6359	pp	Q9D172 (pp) Q9DC70
6360	pp	Q62442 (pp) P61264
6361	pp	P26443 (pp) Q91Z53
6362	pp	P26443 (pp) Q61425
6363	pp	P26443 (pp) P97807
6364	pp	P26443 (pp) P05202
6365	pp	P26443 (pp) P15105
6366	pp	P26443 (pp) Q9D6R2
6367	pp	P26443 (pp) Q8BH04
6368	pp	P26443 (pp) Q8CHT0
6369	pp	P26443 (pp) P29758
6370	pp	P26443 (pp) P05063
6371	pp	P26443 (pp) Q05920
6372	pp	P26443 (pp) P61922
6373	pp	P26443 (pp) P17751
6374	pp	P26443 (pp) Q60597
6375	pp	P26443 (pp) P70404
6376	pp	P26443 (pp) P56480
6377	pp	P26443 (pp) P63038
6378	pp	P26443 (pp) Q99KI0
6379	pp	P26443 (pp) P48320
6380	pp	P26443 (pp) P54071
6381	pp	P26443 (pp) Q9DCD0
6382	pp	Q91Z53 (pp) P45376
6383	pp	Q99KJ8 (pp) O08788
6384	pp	Q99KJ8 (pp) P28667
6385	pp	O08788 (pp) O35465
6386	pp	Q99KI0 (pp) Q9D2G2
6387	pp	Q99KI0 (pp) Q62351
6388	pp	Q99KI0 (pp) Q91VR2
6389	pp	Q99KI0 (pp) Q9CQH3
6390	pp	Q99KI0 (pp) P17751
6391	pp	Q99KI0 (pp) Q9DC69
6392	pp	Q99KI0 (pp) Q9DB77
6393	pp	Q99KI0 (pp) Q9CZ13
6394	pp	Q99KI0 (pp) P63038
6395	pp	Q99KI0 (pp) P54071
6396	pp	Q99KI0 (pp) P47857
6397	pp	Q99KI0 (pp) P52480
6398	pp	Q99KI0 (pp) Q05920
6399	pp	Q99KI0 (pp) Q9D3D9
6400	pp	Q99KI0 (pp) P70404
6401	pp	Q99KI0 (pp) O09111
6402	pp	Q99KI0 (pp) Q9D6R2
6403	pp	Q99KI0 (pp) Q9ERS2
6404	pp	Q99KI0 (pp) Q91YT0
6405	pp	Q99KI0 (pp) Q9CR68
6406	pp	Q99KI0 (pp) P06745
6407	pp	Q99KI0 (pp) Q9DB20
6408	pp	Q99KI0 (pp) Q9DCJ5
6409	pp	Q99KI0 (pp) Q9D0M3
6410	pp	Q99KI0 (pp) Q9CPP6
6411	pp	Q99KI0 (pp) Q8K1M6
6412	pp	Q99KI0 (pp) P68510
6413	pp	Q99KI0 (pp) Q9WUM5
6414	pp	Q99KI0 (pp) Q60597
6415	pp	Q99KI0 (pp) Q99LX0
6416	pp	Q99KI0 (pp) P35486
6417	pp	Q99KI0 (pp) Q9Z1J3
6418	pp	Q99KI0 (pp) Q03265
6419	pp	Q99KI0 (pp) Q01097
6420	pp	Q99KI0 (pp) P97807
6421	pp	Q99KI0 (pp) P56480
6422	pp	Q99KI0 (pp) P05064
6423	pp	Q99KI0 (pp) Q9D6J6
6424	pp	Q9ERS2 (pp) P50516
6425	pp	Q9ERS2 (pp) Q91VR2
6426	pp	Q9ERS2 (pp) O09111
6427	pp	Q9ERS2 (pp) Q9D6J6
6428	pp	Q9ERS2 (pp) Q9CQH3
6429	pp	P97807 (pp) Q06185
6430	pp	P97807 (pp) P54071
6431	pp	P97807 (pp) Q99LX0
6432	pp	P97807 (pp) Q9D2G2
6433	pp	P97807 (pp) Q9D6R2
6434	pp	P97807 (pp) Q9CQQ7
6435	pp	P97807 (pp) P48771
6436	pp	P97807 (pp) O08756
6437	pp	P97807 (pp) Q9DCD0
6438	pp	P97807 (pp) Q9DCJ5
6439	pp	P97807 (pp) Q9DCS9
6440	pp	P97807 (pp) Q99LC5
6441	pp	P97807 (pp) Q9DC69
6442	pp	P97807 (pp) Q60597
6443	pp	P97807 (pp) Q05920
6444	pp	P97807 (pp) Q91VR2
6445	pp	P97807 (pp) Q91YT0
6446	pp	P97807 (pp) Q8K3J1
6447	pp	P97807 (pp) P06151
6448	pp	P97807 (pp) Q9WUM5
6449	pp	P97807 (pp) Q9D6J6
6450	pp	P97807 (pp) P06745
6451	pp	P97807 (pp) Q8BMF4
6452	pp	P97807 (pp) Q61425
6453	pp	P97807 (pp) Q9CR68
6454	pp	P97807 (pp) Q921G7
6455	pp	P97807 (pp) Q9CQH3
6456	pp	P97807 (pp) Q60931
6457	pp	P97807 (pp) P05202
6458	pp	Q6PHZ2 (pp) P60710
6459	pp	Q6PHZ2 (pp) P99024
6460	pp	Q6PHZ2 (pp) P35436
6461	pp	Q6PHZ2 (pp) P63101
6462	pp	Q6PHZ2 (pp) P68369
6463	pp	P60710 (pp) Q9R0Q6
6464	pp	P60710 (pp) P59999
6465	pp	P60710 (pp) Q9D898
6466	pp	P60710 (pp) P35438
6467	pp	P60710 (pp) P16054
6468	pp	P60710 (pp) Q9CPW4
6469	pp	P60710 (pp) Q9JM76
6470	pp	P60710 (pp) O70589
6471	pp	Q02248 (pp) P05480
6472	pp	Q02248 (pp) Q61301
6473	pp	Q02248 (pp) P35438
6474	pp	Q02248 (pp) P39688
6475	pp	Q02248 (pp) P68510
6476	pp	Q02248 (pp) Q68FH0
6477	pp	Q02248 (pp) O88712
6478	pp	Q02248 (pp) Q01097
6479	pp	Q02248 (pp) P63001
6480	pp	P05480 (pp) P35436
6481	pp	P05480 (pp) P35438
6482	pp	P05480 (pp) P39053
6483	pp	P05480 (pp) P30999
6484	pp	P05480 (pp) P23242
6485	pp	P51881 (pp) P62259
6486	pp	P51881 (pp) P16054
6487	pp	Q91WD5 (pp) Q8K2B3
6488	pp	Q91WD5 (pp) Q9CQZ6
6489	pp	Q91WD5 (pp) Q99MN9
6490	pp	Q91WD5 (pp) Q9DCJ5
6491	pp	Q91WD5 (pp) P08249
6492	pp	Q91WD5 (pp) P70404
6493	pp	Q91WD5 (pp) Q8VEM8
6494	pp	Q91WD5 (pp) Q9D0M3
6495	pp	Q91WD5 (pp) Q99KI0
6496	pp	Q91WD5 (pp) Q99JY0
6497	pp	Q91WD5 (pp) Q91VR2
6498	pp	Q91WD5 (pp) Q9CQ69
6499	pp	Q91WD5 (pp) Q9D855
6500	pp	Q91WD5 (pp) Q9CQH3
6501	pp	Q91WD5 (pp) Q9DC70
6502	pp	Q91WD5 (pp) P97807
6503	pp	Q91WD5 (pp) Q9CQQ7
6504	pp	Q91WD5 (pp) Q99LX0
6505	pp	Q91WD5 (pp) Q99LC3
6506	pp	Q91WD5 (pp) Q9CQZ5
6507	pp	Q91WD5 (pp) P97450
6508	pp	Q91WD5 (pp) Q9CQC7
6509	pp	Q91WD5 (pp) Q9CQJ8
6510	pp	Q91WD5 (pp) Q9DB77
6511	pp	Q91WD5 (pp) Q9CXZ1
6512	pp	Q91WD5 (pp) Q9D6J6
6513	pp	Q91WD5 (pp) Q9DCS9
6514	pp	Q91WD5 (pp) Q9CR68
6515	pp	Q91WD5 (pp) Q3ULD5
6516	pp	Q91WD5 (pp) P20108
6517	pp	Q91WD5 (pp) Q8BGH2
6518	pp	Q91WD5 (pp) Q03265
6519	pp	Q91WD5 (pp) Q7TMF3
6520	pp	Q91WD5 (pp) Q8CAQ8
6521	pp	Q91WD5 (pp) Q6PB66
6522	pp	Q91WD5 (pp) P56480
6523	pp	Q91WD5 (pp) Q8K3J1
6524	pp	Q91WD5 (pp) Q9D6J5
6525	pp	Q91WD5 (pp) Q9CQ75
6526	pp	Q91WD5 (pp) Q9ERS2
6527	pp	Q91WD5 (pp) Q8K1Z0
6528	pp	Q91WD5 (pp) P52503
6529	pp	Q91WD5 (pp) P17751
6530	pp	Q91WD5 (pp) Q8BH95
6531	pp	Q91WD5 (pp) Q99LC5
6532	pp	Q91WD5 (pp) Q9CZ13
6533	pp	Q91WD5 (pp) Q9DB20
6534	pp	Q91WD5 (pp) P09411
6535	pp	Q91WD5 (pp) Q91VD9
6536	pp	Q91WD5 (pp) P35486
6537	pp	Q91WD5 (pp) Q9WUM5
6538	pp	Q91WD5 (pp) Q9DC69
6539	pp	Q91WD5 (pp) Q91YT0
6540	pp	Q91WD5 (pp) Q99LY9
6541	pp	Q91WD5 (pp) Q9CPP6
6542	pp	Q8K2B3 (pp) P97807
6543	pp	Q8K2B3 (pp) Q8JZQ2
6544	pp	Q8K2B3 (pp) Q8VEM8
6545	pp	Q8K2B3 (pp) Q9D0M3
6546	pp	Q8K2B3 (pp) Q91VR2
6547	pp	Q8K2B3 (pp) Q9D2G2
6548	pp	Q8K2B3 (pp) Q9Z0X1
6549	pp	Q8K2B3 (pp) Q9D051
6550	pp	Q8K2B3 (pp) Q03265
6551	pp	Q8K2B3 (pp) P52196
6552	pp	Q8K2B3 (pp) Q9CPP6
6553	pp	Q8K2B3 (pp) Q9CQQ7
6554	pp	Q8K2B3 (pp) Q99KI0
6555	pp	Q8K2B3 (pp) P09411
6556	pp	Q8K2B3 (pp) Q91YT0
6557	pp	Q8K2B3 (pp) Q9Z2I9
6558	pp	Q8K2B3 (pp) P00493
6559	pp	Q8K2B3 (pp) Q60597
6560	pp	Q8K2B3 (pp) P56480
6561	pp	Q8K2B3 (pp) Q9WUM5
6562	pp	Q8K2B3 (pp) Q99LC5
6563	pp	Q8K2B3 (pp) Q9CR68
6564	pp	Q8K2B3 (pp) Q9CZ13
6565	pp	Q8K2B3 (pp) Q9DC69
6566	pp	Q8K2B3 (pp) Q9D6J6
6567	pp	Q8K2B3 (pp) Q9DB77
6568	pp	Q8K2B3 (pp) P35486
6569	pp	Q8K2B3 (pp) Q8K3J1
6570	pp	Q8K2B3 (pp) P63038
6571	pp	Q8K2B3 (pp) Q9D6R2
6572	pp	Q8K2B3 (pp) Q91VD9
6573	pp	Q8K2B3 (pp) P17751
6574	pp	Q8K2B3 (pp) P58281
6575	pp	Q8K2B3 (pp) Q99JY0
6576	pp	P68369 (pp) P39053
6577	pp	P68369 (pp) P27546
6578	pp	P68369 (pp) P63101
6579	pp	P68369 (pp) P35438
6580	pp	P68369 (pp) P60879
6581	pp	Q8VEM8 (pp) Q9D6J6
6582	pp	Q8VEM8 (pp) Q9CQH3
6583	pp	Q8VEM8 (pp) Q9CQQ7
6584	pp	Q8VEM8 (pp) Q9D3D9
6585	pp	Q3ULD5 (pp) Q8R4N0
6586	pp	Q3ULD5 (pp) Q99MN9
6587	pp	Q3ULD5 (pp) Q9JHI5
6588	pp	Q3ULD5 (pp) Q921G7
6589	pp	Q3ULD5 (pp) Q8BMS1
6590	pp	Q3ULD5 (pp) Q8BH95
6591	pp	Q3ULD5 (pp) Q91ZA3
6592	pp	Q3ULD5 (pp) Q99MR8
6593	pp	Q3ULD5 (pp) Q9D0K2
6594	pp	Q3ULD5 (pp) Q05920
6595	pp	Q8R4N0 (pp) Q91ZA3
6596	pp	Q8R4N0 (pp) Q99MR8
6597	pp	Q8R4N0 (pp) P05480
6598	pp	Q8R4N0 (pp) Q9WUM5
6599	pp	Q8R4N0 (pp) Q99LC5
6600	pp	P52503 (pp) Q9D6J6
6601	pp	P52503 (pp) P48771
6602	pp	P52503 (pp) Q9CQZ6
6603	pp	P52503 (pp) Q91YT0
6604	pp	P52503 (pp) Q9CZ13
6605	pp	P52503 (pp) Q91VD9
6606	pp	P52503 (pp) Q9CQZ5
6607	pp	P52503 (pp) P42125
6608	pp	P52503 (pp) P43024
6609	pp	P52503 (pp) P62073
6610	pp	P52503 (pp) Q9DC69
6611	pp	P52503 (pp) Q8K3J1
6612	pp	P52503 (pp) Q9CQQ7
6613	pp	P52503 (pp) Q9CQJ8
6614	pp	P52503 (pp) Q9CQH3
6615	pp	P52503 (pp) Q9CR68
6616	pp	P52503 (pp) P56391
6617	pp	P52503 (pp) Q9DB20
6618	pp	P52503 (pp) Q99LC3
6619	pp	P52503 (pp) P97450
6620	pp	P52503 (pp) Q99LX0
6621	pp	P52503 (pp) Q9DCJ5
6622	pp	P52503 (pp) Q9CXZ1
6623	pp	P52503 (pp) Q9D0M3
6624	pp	P52503 (pp) Q9CQC7
6625	pp	P52503 (pp) Q9D6J5
6626	pp	P52503 (pp) P99029
6627	pp	P52503 (pp) Q9ERS2
6628	pp	P52503 (pp) Q06185
6629	pp	P52503 (pp) Q9CQ54
6630	pp	P52503 (pp) P17665
6631	pp	P52503 (pp) Q9CPP6
6632	pp	P52503 (pp) Q99LY9
6633	pp	P52503 (pp) Q9DCS9
6634	pp	P52503 (pp) Q9D3D9
6635	pp	P52503 (pp) O08756
6636	pp	P52503 (pp) O09111
6637	pp	P52503 (pp) Q9CQ69
6638	pp	P52503 (pp) Q9Z1P6
6639	pp	Q60631 (pp) Q62277
6640	pp	Q60631 (pp) Q62420
6641	pp	Q60631 (pp) P18052
6642	pp	Q60631 (pp) P04925
6643	pp	Q60631 (pp) P20444
6644	pp	Q60631 (pp) P12023
6645	pp	Q60631 (pp) O08585
6646	pp	Q60631 (pp) P05480
6647	pp	Q60631 (pp) Q8CHC4
6648	pp	Q60631 (pp) P39053
6649	pp	Q60631 (pp) Q68FD5
6650	pp	Q62277 (pp) P60879
6651	pp	Q62277 (pp) P62204
6652	pp	Q62277 (pp) P46096
6653	pp	Q62277 (pp) P63044
6654	pp	Q62277 (pp) P01831
6655	pp	Q62277 (pp) P43006
6656	pp	P62073 (pp) P99029
6657	pp	P62073 (pp) O08756
6658	pp	P62073 (pp) Q9ERS2
6659	pp	P62073 (pp) Q925I1
6660	pp	P62073 (pp) Q9DCJ5
6661	pp	P62073 (pp) P56391
6662	pp	P62073 (pp) O35658
6663	pp	P62073 (pp) Q9CR68
6664	pp	P62073 (pp) Q9D3D9
6665	pp	P62073 (pp) Q9DCS9
6666	pp	P62073 (pp) P67778
6667	pp	P62073 (pp) Q9D6J6
6668	pp	P62073 (pp) Q9CQH3
6669	pp	P99029 (pp) Q9D6J6
6670	pp	Q9CQV8 (pp) P62259
6671	pp	Q9CQV8 (pp) P63101
6672	pp	Q9CQV8 (pp) P16054
6673	pp	Q9CQV8 (pp) Q64010
6674	pp	Q9CQV8 (pp) P10637
6675	pp	Q9CQR4 (pp) Q9CQH3
6676	pp	Q9CQR4 (pp) P97450
6677	pp	Q9CQR4 (pp) Q9D6J6
6678	pp	Q9CQR4 (pp) Q9DCD0
6679	pp	Q9CQR4 (pp) Q9CQZ6
6680	pp	Q9CQR4 (pp) Q9CQZ5
6681	pp	Q9CQR4 (pp) Q9DCJ5
6682	pp	Q9CQR4 (pp) Q99LC5
6683	pp	Q9CQR4 (pp) Q61425
6684	pp	P40142 (pp) P09411
6685	pp	P40142 (pp) Q9DCD0
6686	pp	P40142 (pp) P06745
6687	pp	P40142 (pp) Q93092
6688	pp	P40142 (pp) P16858
6689	pp	P40142 (pp) Q60597
6690	pp	P40142 (pp) P52480
6691	pp	P40142 (pp) P17751
6692	pp	P40142 (pp) P05064
6693	pp	P40142 (pp) P06151
6694	pp	P40142 (pp) P17182
6695	pp	P40142 (pp) P35486
6696	pp	P40142 (pp) Q9D0F9
6697	pp	P40142 (pp) P05063
6698	pp	P63213 (pp) P62874
6699	pp	P63213 (pp) P18872
6700	pp	P62874 (pp) P04925
6701	pp	Q99KR7 (pp) O35658
6702	pp	Q99KR7 (pp) P56480
6703	pp	O35658 (pp) P40630
6704	pp	O35658 (pp) Q9CQQ7
6705	pp	Q7TMF3 (pp) Q9DCX2
6706	pp	Q7TMF3 (pp) Q9CXZ1
6707	pp	Q7TMF3 (pp) O09111
6708	pp	Q7TMF3 (pp) Q9CR68
6709	pp	Q7TMF3 (pp) Q9CQ54
6710	pp	Q7TMF3 (pp) Q9DC69
6711	pp	Q7TMF3 (pp) Q62425
6712	pp	Q7TMF3 (pp) Q9D0M3
6713	pp	Q7TMF3 (pp) P97450
6714	pp	Q7TMF3 (pp) P52503
6715	pp	Q7TMF3 (pp) Q9D855
6716	pp	Q7TMF3 (pp) Q9DC70
6717	pp	Q7TMF3 (pp) Q9DCS9
6718	pp	Q7TMF3 (pp) Q9CQZ5
6719	pp	Q7TMF3 (pp) Q9CQQ7
6720	pp	Q7TMF3 (pp) Q9Z1P6
6721	pp	Q7TMF3 (pp) Q9DCJ5
6722	pp	Q7TMF3 (pp) Q9CQZ6
6723	pp	Q7TMF3 (pp) Q3UIU2
6724	pp	Q7TMF3 (pp) Q9ERS2
6725	pp	Q7TMF3 (pp) Q9CQJ8
6726	pp	Q7TMF3 (pp) Q9D6J5
6727	pp	Q7TMF3 (pp) Q99LY9
6728	pp	Q7TMF3 (pp) Q8K3J1
6729	pp	Q7TMF3 (pp) Q9CQC7
6730	pp	Q7TMF3 (pp) Q9CQH3
6731	pp	Q7TMF3 (pp) Q9D3D9
6732	pp	Q7TMF3 (pp) Q9D6J6
6733	pp	Q7TMF3 (pp) Q9CQ69
6734	pp	Q7TMF3 (pp) Q91YT0
6735	pp	Q7TMF3 (pp) Q91VD9
6736	pp	Q7TMF3 (pp) Q99LC3
6737	pp	Q9DCX2 (pp) Q9ERS2
6738	pp	Q9DCX2 (pp) Q99LX0
6739	pp	Q9DCX2 (pp) Q91VR2
6740	pp	Q9DCX2 (pp) Q9CQQ7
6741	pp	Q9DCX2 (pp) Q9D6J6
6742	pp	Q9DCX2 (pp) Q9CQH3
6743	pp	Q9DCX2 (pp) Q9D3D9
6744	pp	Q9DCX2 (pp) Q99LY9
6745	pp	Q61735 (pp) P97797
6746	pp	P50518 (pp) Q8BVE3
6747	pp	P50518 (pp) Q9Z1G4
6748	pp	P50518 (pp) P63082
6749	pp	P50518 (pp) P57746
6750	pp	P50518 (pp) Q9WTT4
6751	pp	P50518 (pp) Q9Z1G3
6752	pp	P50518 (pp) P50516
[truncated: 1,394 more rows]
