# Supplementary material for: APP Is a Context-Sensitive Regulator of the Hippocampal Presynaptic Active Zone
Source: PLOS journal article supplement (doi:10.1371/journal.pcbi.1004832), 2016-04-19
Supplement: S6 (10.1371/journal.pcbi.1004832.s006) [file journal.pcbi.1004832.s006.cys › CytoscapeSession-2016_01_22-10_07/tables/4116-Core+Network+Subcommunities/SHARED_ATTRS-org.cytoscape.model.CyNode-4116+shared+node.cytable]

CyCSV-Version	1
SUID	shared name
java.lang.Long	java.lang.String
4116 shared node
4142	Q01097
4143	Q80Z38
4144	Q9CQZ5
4145	Q9D6J6
4146	O08749
4147	Q9D051
4148	Q9D3D9
4149	O09111
4150	Q03265
4151	P68510
4152	P12382
4153	P35438
4154	P05202
4155	Q9QUI0
4156	Q06335
4157	P23819
4158	P35436
4159	Q9CZU6
4160	Q9DCD0
4161	P51863
4162	Q9Z1G3
4163	P62259
4164	P47757
4165	Q8C8R3
4166	P16546
4167	P63330
4168	Q76MZ3
4169	Q9CQZ6
4170	Q9CQ54
4171	Q9DCT2
4172	Q9CQ69
4173	P08249
4174	Q9D6R2
4175	P54071
4176	P06151
4177	Q9DB20
4178	Q9CQH3
4179	Q3UHD9
4180	Q9Z2H5
4181	Q6P9K8
4182	O88952
4183	P19783
4184	Q8BK64
4185	P63038
4186	Q8BH95
4187	Q9CZ13
4188	Q9D0M3
4189	Q99LC3
4190	Q99LY9
4191	Q8BMF4
4192	Q05920
4193	P63085
4194	P61027
4195	Q61598
4196	P56480
4197	P17742
4198	P68404
4199	P67778
4200	Q9JLJ2
4201	Q91VR2
4202	Q9CPQ8
4203	Q91VD9
4204	Q9DCS9
4205	Q9CR68
4206	P52196
4207	P05132
4208	Q9CQJ8
4209	Q06185
4210	Q9DC70
4211	Q9D0S9
4212	Q9D1K2
4213	Q9Z1G4
4214	Q9WUM5
4215	Q9D0K2
4216	Q9CQN1
4217	P63037
4218	Q9DCW4
4219	Q9CPP6
4220	P15105
4221	P46460
4222	Q08331
4223	Q9CQ62
4224	P62897
4225	Q9D2G2
4226	Q3UIU2
4227	P31938
4228	P17427
4229	P17426
4230	P57746
4231	P50516
4232	P70404
4233	O88441
4234	Q7TQI3
4235	P17751
4236	P09411
4237	Q9Z1P6
4238	P63137
4239	P62812
4240	O70325
4241	P48771
4242	Q64133
4243	P47738
4244	P63005
4245	Q6PER3
4246	O70161
4247	Q9Z1B3
4248	Q921G7
4249	Q8BWT1
4250	Q9CQA3
4251	P12787
4252	Q61425
4253	Q99LC5
4254	Q8BGH2
4255	Q99LX0
4256	P62331
4257	Q8K1Z0
4258	P11499
4259	P05064
4260	P17710
4261	P48320
4262	P61922
4263	P12023
4264	P62814
4265	Q9WV92
4266	Q8R5M8
4267	O35526
4268	Q9WV18
4269	P56391
4270	Q9D172
4271	Q62442
4272	P26443
4273	Q91Z53
4274	Q99KJ8
4275	O08788
4276	Q99KI0
4277	Q9ERS2
4278	P97807
4279	Q6PHZ2
4280	P60710
4281	Q02248
4282	P05480
4283	P51881
4284	Q91WD5
4285	Q8K2B3
4286	P68369
4287	Q8VEM8
4288	Q3ULD5
4289	Q8R4N0
4290	P52503
4291	Q60631
4292	Q62277
4293	P62073
4294	P99029
4295	Q9CQV8
4296	Q9CQR4
4297	P40142
4298	P63213
4299	P62874
4300	Q9EQ20
4301	Q99KR7
4302	O35658
4303	Q7TMF3
4304	Q9DCX2
4305	Q61735
4306	P97797
4307	P50518
4308	Q8BVE3
4309	Q9JLB0
4310	Q99N28
4311	P19536
4312	Q60864
4313	Q9QYJ0
4314	Q68FD5
4315	Q9R0Q6
4316	Q9JM76
4317	Q91YT0
4318	Q9DCJ5
4319	P60879
4320	P28660
4321	O08756
4322	Q99JY0
4323	P04925
4324	P39688
4325	P49615
4326	P03930
4327	Q9CQ75
4328	P18872
4329	Q8VDD5
4330	P51174
4331	Q8JZQ2
4332	Q8JZN5
4333	Q60676
4334	Q9CXZ1
4335	Q8BG51
4336	P63001
4337	Q62351
4338	P63044
4339	P46660
4340	Q9JHU4
4341	Q9D855
4342	Q8K3J1
4343	Q9DB77
4344	Q91VM9
4345	Q9DC69
4346	Q9JJV2
4347	Q9CQQ7
4348	O88696
4349	O35129
4350	Q9CZS1
4351	P70232
4352	P18052
4353	P56379
4354	Q9D023
4355	P12367
4356	Q61548
4357	P45878
4358	P63017
4359	Q9D898
4360	Q80T41
4361	Q9R0K7
4362	P13707
4363	Q64521
4364	Q9QUH0
4365	P20108
4366	Q9JLM8
4367	Q64010
4368	P97450
4369	O88935
4370	P62823
4371	Q99PT1
4372	Q99MN9
4373	Q99JY9
4374	P14094
4375	P47754
4376	Q9CZT8
4377	P35486
4378	P22315
4379	Q61102
4380	P62962
4381	P16054
4382	P09671
4383	P18572
4384	O35465
4385	Q8BPN8
4386	P63082
4387	Q9CQ92
4388	Q8K1M6
4389	Q9DBL1
4390	P53395
4391	Q9JHI5
4392	Q93092
4393	P52480
4394	Q9DB05
4395	Q61301
4396	Q9Z2I9
4397	P50544
4398	Q61831
4399	P63040
4400	Q923T9
4401	Q920I9
4402	P06745
4403	Q3UTJ2
4404	Q7TPR4
4405	P61264
4406	P70441
4407	P26040
4408	Q9EP69
4409	Q62420
4410	P43024
4411	P14873
4412	P09103
4413	P56382
4414	Q3UMR5
4415	Q91ZA3
4416	Q61879
4417	P63101
4418	Q9QWI6
4419	Q8R001
4420	Q9DBF1
4421	Q64516
4422	Q8VDN2
4423	Q6PCP5
4424	P23506
4425	Q9D6J5
4426	Q00612
4427	Q9WTT4
4428	Q5FWK3
4429	Q8CHU3
4430	P59999
4431	Q9CVB6
4432	Q9CQC7
4433	O88737
4434	Q6PH08
4435	P39053
4436	Q6PB66
4437	P31324
4438	Q8BR92
4439	P97772
4440	Q8CHT0
4441	P29758
4442	Q99L47
4443	Q7TQF7
4444	P15116
4445	P06837
4446	P07901
4447	P61982
4448	Q9WUA3
4449	Q60597
4450	P05063
4451	Q8BKZ9
4452	Q9CPW4
4453	P17182
4454	Q8BMS1
4455	Q9Z268
4456	Q8BGD5
4457	P42125
4458	Q61290
4459	Q8R0S4
4460	P08226
4461	Q91ZX7
4462	Q8BLK3
4463	P62835
4464	Q6R891
4465	P60766
4466	Q99104
4467	Q62048
4468	Q9D6M3
4469	P47857
4470	P68368
4471	Q922R8
4472	P10637
4473	P55088
4474	Q9DBG3
4475	Q6IRU5
4476	P17183
4477	Q9QXS6
4478	Q8BHL5
4479	O88712
4480	Q9DCB8
4481	Q9Z1J3
4482	Q8BMF3
4483	Q62425
4484	P38647
4485	P63011
4486	Q60598
4487	P61161
4488	Q9Z0X1
4489	Q8VDP6
4490	Q99L43
4491	Q8CAQ8
4492	Q9JLZ3
4493	P17665
4494	Q60931
4495	Q8QZT1
4496	Q8VD37
4497	P16858
4498	P62746
4499	P11627
4500	P13595
4501	Q8BKX1
4502	O70589
4503	P16330
4504	P03995
4505	P99024
4506	Q9Z218
4507	P84091
4508	Q9QXJ1
4509	P68033
4510	Q9R0Y5
4511	P47802
4512	Q6PIE5
4513	P70414
4514	P28652
4515	Q99K85
4516	P17156
4517	P62204
4518	P68254
4519	Q9DBJ1
4520	P23818
4521	Q68FF6
4522	P30999
4523	P62482
4524	Q60996
4525	Q9R0N7
4526	Q62261
4527	Q925I1
4528	P48453
4529	Q4ACU6
4530	Q8BYM5
4531	Q9JIS5
4532	P40630
4533	Q9CS84
4534	O08539
4535	O70318
4536	Q64332
4537	P60761
4538	P00493
4539	Q9Z0R4
4540	Q80Y14
4541	Q5SQX6
4542	Q9CPQ1
4543	Q3UHL1
4544	Q60932
4545	O08585
4546	Q9QYR6
4547	B9EKR1
4548	O54991
4549	P45376
4550	Q62419
4551	P60469
4552	Q91ZJ5
4553	P63328
4554	O55042
4555	P28667
4556	Q9D8B3
4557	P01831
4558	P20357
4559	Q3UVX5
4560	Q91WC3
4561	Q8BWF0
4562	Q8BH04
4563	Q99MR8
4564	Q99PJ0
4565	Q9D6F9
4566	P41216
4567	Q6P1F6
4568	P28663
4569	P68181
4570	Q80VP1
4571	Q6PIC6
4572	Q9R111
4573	Q9D0F9
4574	Q62465
4575	Q9WUB3
4576	Q91VZ6
4577	Q8CHC4
4578	Q61411
4579	Q60875
4580	O55023
4581	Q80UU9
4582	Q9R0P9
4583	P0C0A3
4584	Q9WU78
4585	P50396
4586	P62821
4587	Q9CQI6
4588	Q9CRB9
4589	P35279
4590	Q9DC28
4591	Q8VBV7
4592	P47708
4593	Q60605
4594	P22723
4595	P62743
4596	P19246
4597	Q80U28
4598	Q61553
4599	Q810U3
4600	P67871
4601	Q8R3V5
4602	P58281
4603	P27546
4604	P63318
4605	P70296
4606	P56564
4607	P00405
4608	Q9EPJ9
4609	Q5DQR4
4610	O35239
4611	Q8BW75
4612	O08599
4613	Q9QXS1
4614	P20444
4615	Q60930
4616	Q99P72
4617	O35643
4618	Q8R191
4619	P61164
4620	O55100
4621	Q5RJI5
4622	Q8BZ98
4623	Q61644
4624	P19096
4625	P35564
4626	Q9CZ42
4627	Q61490
4628	P46096
4629	Q922H2
4630	P28740
4631	Q9CWZ7
4632	O35857
4633	Q9D880
4634	P43406
4635	Q71LX4
4636	P48962
4637	Q8CI94
4638	Q8K021
4639	P63321
4640	P48722
4641	O35143
4642	P84096
4643	P26645
4644	P28661
4645	P42208
4646	Q9WV34
4647	Q9Z2Q6
4648	Q9Z2I0
4649	P18760
4650	P40124
4651	O54983
4652	Q8VDQ8
4653	P08551
4654	Q8K4Z3
4655	P08553
4656	Q61699
4657	P12960
4658	Q7TSJ2
4659	O35136
4660	O55131
4661	Q9WV55
4662	Q7TMB8
4663	Q80TZ3
4664	O88643
4665	Q8BIJ6
4666	P55302
4667	Q91XV3
4668	P48758
4669	Q9R1V6
4670	P23242
4671	Q9QY76
4672	P57780
4673	Q9CR16
4674	Q99NE5
4675	Q8K183
4676	P11798
4677	P48036
4678	Q9D1T0
4679	Q61316
4680	O08917
4681	Q60634
4682	P97300
4683	Q8CHH9
4684	Q9CR62
4685	Q91VR7
4686	Q68FH0
4687	Q7TMM9
4688	Q2PFD7
4689	Q920P5
4690	Q3THE2
4691	Q61151
4692	Q91VT4
4693	Q78IK2
4694	Q8R5C5
4695	Q03157
4696	Q8CGK3
4697	Q3ULJ0
4698	Q61206
4699	Q9QYA2
4700	Q8R366
4701	F6SEU4
4702	Q921M7
4703	Q8BH59
4704	Q8BRT1
4705	P20152
4706	Q9CZW5
4707	Q6P9K9
4708	Q9CQW1
4709	Q921J2
4710	Q9ERD7
4711	P43006
4712	Q80XN0
4713	Q9CWS0
4714	Q8K0T0
4715	P13020
4716	Q61330
4717	Q63810
4718	Q9Z2W9
4719	Q04447
4720	Q9Z0P4
4721	Q9D8Y0
4722	Q9CYT6
4723	Q99KB8
4724	Q9D6K5
4725	Q6URW6
4726	Q9R1V7
4727	Q9ES97
4728	D3YVF0
4729	Q810U4
4730	A2CG49
4731	P53994
4732	O89053
4733	Q9JIA1
4734	Q91WS0
4735	Q8K400
4736	Q91ZZ3
4737	Q9QZF2
4738	Q812A2
4739	Q9Z0E0
4740	Q4KMM3
4741	Q9CR95
4742	Q60737
4743	P80560
4744	P35802
4745	Q9EQZ6
4746	P23927
4747	Q9QYX7
4748	Q03137
4749	P58771
4750	Q8VHW2
4751	O54774
4752	Q9DB73
4753	O88342
4754	Q9R0P5
4755	Q9R1V4
4756	Q00493
