# Supplementary material for: APP Is a Context-Sensitive Regulator of the Hippocampal Presynaptic Active Zone
Source: PLOS journal article supplement (doi:10.1371/journal.pcbi.1004832), 2016-04-19
Supplement: S6 (10.1371/journal.pcbi.1004832.s006) [file journal.pcbi.1004832.s006.cys › CytoscapeSession-2016_01_22-10_07/tables/4132-Subcommunities/HIDDEN-org.cytoscape.model.CyEdge-4132+hidden+edge.cytable]

"CyCSV-Version","1"
"SUID"
"java.lang.Long"
""
"4132 hidden edge",""
"4757"
"4758"
"4759"
"4760"
"4761"
"4762"
"4763"
"4764"
"4765"
"4766"
"4767"
"4768"
"4769"
"4770"
"4771"
"4772"
"4773"
"4774"
"4775"
"4776"
"4777"
"4778"
"4779"
"4780"
"4781"
"4782"
"4783"
"4784"
"4785"
"4786"
"4787"
"4788"
"4789"
"4790"
"4791"
"4792"
"4793"
"4794"
"4795"
"4796"
"4797"
"4798"
"4799"
"4800"
"4801"
"4802"
"4803"
"4804"
"4805"
"4806"
"4807"
"4808"
"4809"
"4810"
"4811"
"4812"
"4813"
"4814"
"4815"
"4816"
"4817"
"4818"
"4819"
"4820"
"4821"
"4822"
"4823"
"4824"
"4825"
"4826"
"4827"
"4828"
"4829"
"4830"
"4831"
"4832"
"4833"
"4834"
"4835"
"4836"
"4837"
"4838"
"4839"
"4840"
"4841"
"4842"
"4843"
"4844"
"4845"
"4846"
"4847"
"4848"
"4849"
"4850"
"4851"
"4852"
"4853"
"4854"
"4855"
"4856"
"4857"
"4858"
"4859"
"4860"
"4861"
"4862"
"4863"
"4864"
"4865"
"4866"
"4867"
"4868"
"4869"
"4870"
"4871"
"4872"
"4873"
"4874"
"4875"
"4876"
"4877"
"4878"
"4879"
"4880"
"4881"
"4882"
"4883"
"4884"
"4885"
"4886"
"4887"
"4888"
"4889"
"4890"
"4891"
"4892"
"4893"
"4894"
"4895"
"4896"
"4897"
"4898"
"4899"
"4900"
"4901"
"4902"
"4903"
"4904"
"4905"
"4906"
"4907"
"4908"
"4909"
"4910"
"4911"
"4912"
"4913"
"4914"
"4915"
"4916"
"4917"
"4918"
"4919"
"4920"
"4921"
"4922"
"4923"
"4924"
"4925"
"4926"
"4927"
"4928"
"4929"
"4930"
"4931"
"4932"
"4933"
"4934"
"4935"
"4936"
"4937"
"4938"
"4939"
"4940"
"4941"
"4942"
"4943"
"4944"
"4945"
"4946"
"4947"
"4948"
"4949"
"4950"
"4951"
"4952"
"4953"
"4954"
"4955"
"4956"
"4957"
"4958"
"4959"
"4960"
"4961"
"4962"
"4963"
"4964"
"4965"
"4966"
"4967"
"4968"
"4969"
"4970"
"4971"
"4972"
"4973"
"4974"
"4975"
"4976"
"4977"
"4978"
"4979"
"4980"
"4981"
"4982"
"4983"
"4984"
"4985"
"4986"
"4987"
"4988"
"4989"
"4990"
"4991"
"4992"
"4993"
"4994"
"4995"
"4996"
"4997"
"4998"
"4999"
"5000"
"5001"
"5002"
"5003"
"5004"
"5005"
"5006"
"5007"
"5008"
"5009"
"5010"
"5011"
"5012"
"5013"
"5014"
"5015"
"5016"
"5017"
"5018"
"5019"
"5020"
"5021"
"5022"
"5023"
"5024"
"5025"
"5026"
"5027"
"5028"
"5029"
"5030"
"5031"
"5032"
"5033"
"5034"
"5035"
"5036"
"5037"
"5038"
"5039"
"5040"
"5041"
"5042"
"5043"
"5044"
"5045"
"5046"
"5047"
"5048"
"5049"
"5050"
"5051"
"5052"
"5053"
"5054"
"5055"
"5056"
"5057"
"5058"
"5059"
"5060"
"5061"
"5062"
"5063"
"5064"
"5065"
"5066"
"5067"
"5068"
"5069"
"5070"
"5071"
"5072"
"5073"
"5074"
"5075"
"5076"
"5077"
"5078"
"5079"
"5080"
"5081"
"5082"
"5083"
"5084"
"5085"
"5086"
"5087"
"5088"
"5089"
"5090"
"5091"
"5092"
"5093"
"5094"
"5095"
"5096"
"5097"
"5098"
"5099"
"5100"
"5101"
"5102"
"5103"
"5104"
"5105"
"5106"
"5107"
"5108"
"5109"
"5110"
"5111"
"5112"
"5113"
"5114"
"5115"
"5116"
"5117"
"5118"
"5119"
"5120"
"5121"
"5122"
"5123"
"5124"
"5125"
"5126"
"5127"
"5128"
"5129"
"5130"
"5131"
"5132"
"5133"
"5134"
"5135"
"5136"
"5137"
"5138"
"5139"
"5140"
"5141"
"5142"
"5143"
"5144"
"5145"
"5146"
"5147"
"5148"
"5149"
"5150"
"5151"
"5152"
"5153"
"5154"
"5155"
"5156"
"5157"
"5158"
"5159"
"5160"
"5161"
"5162"
"5163"
"5164"
"5165"
"5166"
"5167"
"5168"
"5169"
"5170"
"5171"
"5172"
"5173"
"5174"
"5175"
"5176"
"5177"
"5178"
"5179"
"5180"
"5181"
"5182"
"5183"
"5184"
"5185"
"5186"
"5187"
"5188"
"5189"
"5190"
"5191"
"5192"
"5193"
"5194"
"5195"
"5196"
"5197"
"5198"
"5199"
"5200"
"5201"
"5202"
"5203"
"5204"
"5205"
"5206"
"5207"
"5208"
"5209"
"5210"
"5211"
"5212"
"5213"
"5214"
"5215"
"5216"
"5217"
"5218"
"5219"
"5220"
"5221"
"5222"
"5223"
"5224"
"5225"
"5226"
"5227"
"5228"
"5229"
"5230"
"5231"
"5232"
"5233"
"5234"
"5235"
"5236"
"5237"
"5238"
"5239"
"5240"
"5241"
"5242"
"5243"
"5244"
"5245"
"5246"
"5247"
"5248"
"5249"
"5250"
"5251"
"5252"
"5253"
"5254"
"5255"
"5256"
"5257"
"5258"
"5259"
"5260"
"5261"
"5262"
"5263"
"5264"
"5265"
"5266"
"5267"
"5268"
"5269"
"5270"
"5271"
"5272"
"5273"
"5274"
"5275"
"5276"
"5277"
"5278"
"5279"
"5280"
"5281"
"5282"
"5283"
"5284"
"5285"
"5286"
"5287"
"5288"
"5289"
"5290"
"5291"
"5292"
"5293"
"5294"
"5295"
"5296"
"5297"
"5298"
"5299"
"5300"
"5301"
"5302"
"5303"
"5304"
"5305"
"5306"
"5307"
"5308"
"5309"
"5310"
"5311"
"5312"
"5313"
"5314"
"5315"
"5316"
"5317"
"5318"
"5319"
"5320"
"5321"
"5322"
"5323"
"5324"
"5325"
"5326"
"5327"
"5328"
"5329"
"5330"
"5331"
"5332"
"5333"
"5334"
"5335"
"5336"
"5337"
"5338"
"5339"
"5340"
"5341"
"5342"
"5343"
"5344"
"5345"
"5346"
"5347"
"5348"
"5349"
"5350"
"5351"
"5352"
"5353"
"5354"
"5355"
"5356"
"5357"
"5358"
"5359"
"5360"
"5361"
"5362"
"5363"
"5364"
"5365"
"5366"
"5367"
"5368"
"5369"
"5370"
"5371"
"5372"
"5373"
"5374"
"5375"
"5376"
"5377"
"5378"
"5379"
"5380"
"5381"
"5382"
"5383"
"5384"
"5385"
"5386"
"5387"
"5388"
"5389"
"5390"
"5391"
"5392"
"5393"
"5394"
"5395"
"5396"
"5397"
"5398"
"5399"
"5400"
"5401"
"5402"
"5403"
"5404"
"5405"
"5406"
"5407"
"5408"
"5409"
"5410"
"5411"
"5412"
"5413"
"5414"
"5415"
"5416"
"5417"
"5418"
"5419"
"5420"
"5421"
"5422"
"5423"
"5424"
"5425"
"5426"
"5427"
"5428"
"5429"
"5430"
"5431"
"5432"
"5433"
"5434"
"5435"
"5436"
"5437"
"5438"
"5439"
"5440"
"5441"
"5442"
"5443"
"5444"
"5445"
"5446"
"5447"
"5448"
"5449"
"5450"
"5451"
"5452"
"5453"
"5454"
"5455"
"5456"
"5457"
"5458"
"5459"
"5460"
"5461"
"5462"
"5463"
"5464"
"5465"
"5466"
"5467"
"5468"
"5469"
"5470"
"5471"
"5472"
"5473"
"5474"
"5475"
"5476"
"5477"
"5478"
"5479"
"5480"
"5481"
"5482"
"5483"
"5484"
"5485"
"5486"
"5487"
"5488"
"5489"
"5490"
"5491"
"5492"
"5493"
"5494"
"5495"
"5496"
"5497"
"5498"
"5499"
"5500"
"5501"
"5502"
"5503"
"5504"
"5505"
"5506"
"5507"
"5508"
"5509"
"5510"
"5511"
"5512"
"5513"
"5514"
"5515"
"5516"
"5517"
"5518"
"5519"
"5520"
"5521"
"5522"
"5523"
"5524"
"5525"
"5526"
"5527"
"5528"
"5529"
"5530"
"5531"
"5532"
"5533"
"5534"
"5535"
"5536"
"5537"
"5538"
"5539"
"5540"
"5541"
"5542"
"5543"
"5544"
"5545"
"5546"
"5547"
"5548"
"5549"
"5550"
"5551"
"5552"
"5553"
"5554"
"5555"
"5556"
"5557"
"5558"
"5559"
"5560"
"5561"
"5562"
"5563"
"5564"
"5565"
"5566"
"5567"
"5568"
"5569"
"5570"
"5571"
"5572"
"5573"
"5574"
"5575"
"5576"
"5577"
"5578"
"5579"
"5580"
"5581"
"5582"
"5583"
"5584"
"5585"
"5586"
"5587"
"5588"
"5589"
"5590"
"5591"
"5592"
"5593"
"5594"
"5595"
"5596"
"5597"
"5598"
"5599"
"5600"
"5601"
"5602"
"5603"
"5604"
"5605"
"5606"
"5607"
"5608"
"5609"
"5610"
"5611"
"5612"
"5613"
"5614"
"5615"
"5616"
"5617"
"5618"
"5619"
"5620"
"5621"
"5622"
"5623"
"5624"
"5625"
"5626"
"5627"
"5628"
"5629"
"5630"
"5631"
"5632"
"5633"
"5634"
"5635"
"5636"
"5637"
"5638"
"5639"
"5640"
"5641"
"5642"
"5643"
"5644"
"5645"
"5646"
"5647"
"5648"
"5649"
"5650"
"5651"
"5652"
"5653"
"5654"
"5655"
"5656"
"5657"
"5658"
"5659"
"5660"
"5661"
"5662"
"5663"
"5664"
"5665"
"5666"
"5667"
"5668"
"5669"
"5670"
"5671"
"5672"
"5673"
"5674"
"5675"
"5676"
"5677"
"5678"
"5679"
"5680"
"5681"
"5682"
"5683"
"5684"
"5685"
"5686"
"5687"
"5688"
"5689"
"5690"
"5691"
"5692"
"5693"
"5694"
"5695"
"5696"
"5697"
"5698"
"5699"
"5700"
"5701"
"5702"
"5703"
"5704"
"5705"
"5706"
"5707"
"5708"
"5709"
"5710"
"5711"
"5712"
"5713"
"5714"
"5715"
"5716"
"5717"
"5718"
"5719"
"5720"
"5721"
"5722"
"5723"
"5724"
"5725"
"5726"
"5727"
"5728"
"5729"
"5730"
"5731"
"5732"
"5733"
"5734"
"5735"
"5736"
"5737"
"5738"
"5739"
"5740"
"5741"
"5742"
"5743"
"5744"
"5745"
"5746"
"5747"
"5748"
"5749"
"5750"
"5751"
"5752"
"5753"
"5754"
"5755"
"5756"
"5757"
"5758"
"5759"
"5760"
"5761"
"5762"
"5763"
"5764"
"5765"
"5766"
"5767"
"5768"
"5769"
"5770"
"5771"
"5772"
"5773"
"5774"
"5775"
"5776"
"5777"
"5778"
"5779"
"5780"
"5781"
"5782"
"5783"
"5784"
"5785"
"5786"
"5787"
"5788"
"5789"
"5790"
"5791"
"5792"
"5793"
"5794"
"5795"
"5796"
"5797"
"5798"
"5799"
"5800"
"5801"
"5802"
"5803"
"5804"
"5805"
"5806"
"5807"
"5808"
"5809"
"5810"
"5811"
"5812"
"5813"
"5814"
"5815"
"5816"
"5817"
"5818"
"5819"
"5820"
"5821"
"5822"
"5823"
"5824"
"5825"
"5826"
"5827"
"5828"
"5829"
"5830"
"5831"
"5832"
"5833"
"5834"
"5835"
"5836"
"5837"
"5838"
"5839"
"5840"
"5841"
"5842"
"5843"
"5844"
"5845"
"5846"
"5847"
"5848"
"5849"
"5850"
"5851"
"5852"
"5853"
"5854"
"5855"
"5856"
"5857"
"5858"
"5859"
"5860"
"5861"
"5862"
"5863"
"5864"
"5865"
"5866"
"5867"
"5868"
"5869"
"5870"
"5871"
"5872"
"5873"
"5874"
"5875"
"5876"
"5877"
"5878"
"5879"
"5880"
"5881"
"5882"
"5883"
"5884"
"5885"
"5886"
"5887"
"5888"
"5889"
"5890"
"5891"
"5892"
"5893"
"5894"
"5895"
"5896"
"5897"
"5898"
"5899"
"5900"
"5901"
"5902"
"5903"
"5904"
"5905"
"5906"
"5907"
"5908"
"5909"
"5910"
"5911"
"5912"
"5913"
"5914"
"5915"
"5916"
"5917"
"5918"
"5919"
"5920"
"5921"
"5922"
"5923"
"5924"
"5925"
"5926"
"5927"
"5928"
"5929"
"5930"
"5931"
"5932"
"5933"
"5934"
"5935"
"5936"
"5937"
"5938"
"5939"
"5940"
"5941"
"5942"
"5943"
"5944"
"5945"
"5946"
"5947"
"5948"
"5949"
"5950"
"5951"
"5952"
"5953"
"5954"
"5955"
"5956"
"5957"
"5958"
"5959"
"5960"
"5961"
"5962"
"5963"
"5964"
"5965"
"5966"
"5967"
"5968"
"5969"
"5970"
"5971"
"5972"
"5973"
"5974"
"5975"
"5976"
"5977"
"5978"
"5979"
"5980"
"5981"
"5982"
"5983"
"5984"
"5985"
"5986"
"5987"
"5988"
"5989"
"5990"
"5991"
"5992"
"5993"
"5994"
"5995"
"5996"
"5997"
"5998"
"5999"
"6000"
"6001"
"6002"
"6003"
"6004"
"6005"
"6006"
"6007"
"6008"
"6009"
"6010"
"6011"
"6012"
"6013"
"6014"
"6015"
"6016"
"6017"
"6018"
"6019"
"6020"
"6021"
"6022"
"6023"
"6024"
"6025"
"6026"
"6027"
"6028"
"6029"
"6030"
"6031"
"6032"
"6033"
"6034"
"6035"
"6036"
"6037"
"6038"
"6039"
"6040"
"6041"
"6042"
"6043"
"6044"
"6045"
"6046"
"6047"
"6048"
"6049"
"6050"
"6051"
"6052"
"6053"
"6054"
"6055"
"6056"
"6057"
"6058"
"6059"
"6060"
"6061"
"6062"
"6063"
"6064"
"6065"
"6066"
"6067"
"6068"
"6069"
"6070"
"6071"
"6072"
"6073"
"6074"
"6075"
"6076"
"6077"
"6078"
"6079"
"6080"
"6081"
"6082"
"6083"
"6084"
"6085"
"6086"
"6087"
"6088"
"6089"
"6090"
"6091"
"6092"
"6093"
"6094"
"6095"
"6096"
"6097"
"6098"
"6099"
"6100"
"6101"
"6102"
"6103"
"6104"
"6105"
"6106"
"6107"
"6108"
"6109"
"6110"
"6111"
"6112"
"6113"
"6114"
"6115"
"6116"
"6117"
"6118"
"6119"
"6120"
"6121"
"6122"
"6123"
"6124"
"6125"
"6126"
"6127"
"6128"
"6129"
"6130"
"6131"
"6132"
"6133"
"6134"
"6135"
"6136"
"6137"
"6138"
"6139"
"6140"
"6141"
"6142"
"6143"
"6144"
"6145"
"6146"
"6147"
"6148"
"6149"
"6150"
"6151"
"6152"
"6153"
"6154"
"6155"
"6156"
"6157"
"6158"
"6159"
"6160"
"6161"
"6162"
"6163"
"6164"
"6165"
"6166"
"6167"
"6168"
"6169"
"6170"
"6171"
"6172"
"6173"
"6174"
"6175"
"6176"
"6177"
"6178"
"6179"
"6180"
"6181"
"6182"
"6183"
"6184"
"6185"
"6186"
"6187"
"6188"
"6189"
"6190"
"6191"
"6192"
"6193"
"6194"
"6195"
"6196"
"6197"
"6198"
"6199"
"6200"
"6201"
"6202"
"6203"
"6204"
"6205"
"6206"
"6207"
"6208"
"6209"
"6210"
"6211"
"6212"
"6213"
"6214"
"6215"
"6216"
"6217"
"6218"
"6219"
"6220"
"6221"
"6222"
"6223"
"6224"
"6225"
"6226"
"6227"
"6228"
"6229"
"6230"
"6231"
"6232"
"6233"
"6234"
"6235"
"6236"
"6237"
"6238"
"6239"
"6240"
"6241"
"6242"
"6243"
"6244"
"6245"
"6246"
"6247"
"6248"
"6249"
"6250"
"6251"
"6252"
"6253"
"6254"
"6255"
"6256"
"6257"
"6258"
"6259"
"6260"
"6261"
"6262"
"6263"
"6264"
"6265"
"6266"
"6267"
"6268"
"6269"
"6270"
"6271"
"6272"
"6273"
"6274"
"6275"
"6276"
"6277"
"6278"
"6279"
"6280"
"6281"
"6282"
"6283"
"6284"
"6285"
"6286"
"6287"
"6288"
"6289"
"6290"
"6291"
"6292"
"6293"
"6294"
"6295"
"6296"
"6297"
"6298"
"6299"
"6300"
"6301"
"6302"
"6303"
"6304"
"6305"
"6306"
"6307"
"6308"
"6309"
"6310"
"6311"
"6312"
"6313"
"6314"
"6315"
"6316"
"6317"
"6318"
"6319"
"6320"
"6321"
"6322"
"6323"
"6324"
"6325"
"6326"
"6327"
"6328"
"6329"
"6330"
"6331"
"6332"
"6333"
"6334"
"6335"
"6336"
"6337"
"6338"
"6339"
"6340"
"6341"
"6342"
"6343"
"6344"
"6345"
"6346"
"6347"
"6348"
"6349"
"6350"
"6351"
"6352"
"6353"
"6354"
"6355"
"6356"
"6357"
"6358"
"6359"
"6360"
"6361"
"6362"
"6363"
"6364"
"6365"
"6366"
"6367"
"6368"
"6369"
"6370"
"6371"
"6372"
"6373"
"6374"
"6375"
"6376"
"6377"
"6378"
"6379"
"6380"
"6381"
"6382"
"6383"
"6384"
"6385"
"6386"
"6387"
"6388"
"6389"
"6390"
"6391"
"6392"
"6393"
"6394"
"6395"
"6396"
"6397"
"6398"
"6399"
"6400"
"6401"
"6402"
"6403"
"6404"
"6405"
"6406"
"6407"
"6408"
"6409"
"6410"
"6411"
"6412"
"6413"
"6414"
"6415"
"6416"
"6417"
"6418"
"6419"
"6420"
"6421"
"6422"
"6423"
"6424"
"6425"
"6426"
"6427"
"6428"
"6429"
"6430"
"6431"
"6432"
"6433"
"6434"
"6435"
"6436"
"6437"
"6438"
"6439"
"6440"
"6441"
"6442"
"6443"
"6444"
"6445"
"6446"
"6447"
"6448"
"6449"
"6450"
"6451"
"6452"
"6453"
"6454"
"6455"
"6456"
"6457"
"6458"
"6459"
"6460"
"6461"
"6462"
"6463"
"6464"
"6465"
"6466"
"6467"
"6468"
"6469"
"6470"
"6471"
"6472"
"6473"
"6474"
"6475"
"6476"
"6477"
"6478"
"6479"
"6480"
"6481"
"6482"
"6483"
"6484"
"6485"
"6486"
"6487"
"6488"
"6489"
"6490"
"6491"
"6492"
"6493"
"6494"
"6495"
"6496"
"6497"
"6498"
"6499"
"6500"
"6501"
"6502"
"6503"
"6504"
"6505"
"6506"
"6507"
"6508"
"6509"
"6510"
"6511"
"6512"
"6513"
"6514"
"6515"
"6516"
"6517"
"6518"
"6519"
"6520"
"6521"
"6522"
"6523"
"6524"
"6525"
"6526"
"6527"
"6528"
"6529"
"6530"
"6531"
"6532"
"6533"
"6534"
"6535"
"6536"
"6537"
"6538"
"6539"
"6540"
"6541"
"6542"
"6543"
"6544"
"6545"
"6546"
"6547"
"6548"
"6549"
"6550"
"6551"
"6552"
"6553"
"6554"
"6555"
"6556"
"6557"
"6558"
"6559"
"6560"
"6561"
"6562"
"6563"
"6564"
"6565"
"6566"
"6567"
"6568"
"6569"
"6570"
"6571"
"6572"
"6573"
"6574"
"6575"
"6576"
"6577"
"6578"
"6579"
"6580"
"6581"
"6582"
"6583"
"6584"
"6585"
"6586"
"6587"
"6588"
"6589"
"6590"
"6591"
"6592"
"6593"
"6594"
"6595"
"6596"
"6597"
"6598"
"6599"
"6600"
"6601"
"6602"
"6603"
"6604"
"6605"
"6606"
"6607"
"6608"
"6609"
"6610"
"6611"
"6612"
"6613"
"6614"
"6615"
"6616"
"6617"
"6618"
"6619"
"6620"
"6621"
"6622"
"6623"
"6624"
"6625"
"6626"
"6627"
"6628"
"6629"
"6630"
"6631"
"6632"
"6633"
"6634"
"6635"
"6636"
"6637"
"6638"
"6639"
"6640"
"6641"
"6642"
"6643"
"6644"
"6645"
"6646"
"6647"
"6648"
"6649"
"6650"
"6651"
"6652"
"6653"
"6654"
"6655"
"6656"
"6657"
"6658"
"6659"
"6660"
"6661"
"6662"
"6663"
"6664"
"6665"
"6666"
"6667"
"6668"
"6669"
"6670"
"6671"
"6672"
"6673"
"6674"
"6675"
"6676"
"6677"
"6678"
"6679"
"6680"
"6681"
"6682"
"6683"
"6684"
"6685"
"6686"
"6687"
"6688"
"6689"
"6690"
"6691"
"6692"
"6693"
"6694"
"6695"
"6696"
"6697"
"6698"
"6699"
"6700"
"6701"
"6702"
"6703"
"6704"
"6705"
"6706"
"6707"
"6708"
"6709"
"6710"
"6711"
"6712"
"6713"
"6714"
"6715"
"6716"
"6717"
"6718"
"6719"
"6720"
"6721"
"6722"
"6723"
"6724"
"6725"
"6726"
"6727"
"6728"
"6729"
"6730"
"6731"
"6732"
"6733"
"6734"
"6735"
"6736"
"6737"
"6738"
"6739"
"6740"
"6741"
"6742"
"6743"
"6744"
"6745"
"6746"
"6747"
"6748"
"6749"
"6750"
"6751"
"6752"
"6753"
"6754"
"6755"
"6756"
"6757"
"6758"
"6759"
"6760"
"6761"
"6762"
"6763"
"6764"
"6765"
"6766"
"6767"
"6768"
"6769"
"6770"
"6771"
"6772"
"6773"
"6774"
"6775"
"6776"
"6777"
"6778"
"6779"
"6780"
"6781"
"6782"
"6783"
"6784"
"6785"
"6786"
"6787"
"6788"
"6789"
"6790"
"6791"
"6792"
"6793"
"6794"
"6795"
"6796"
"6797"
"6798"
"6799"
"6800"
"6801"
"6802"
"6803"
"6804"
"6805"
"6806"
"6807"
"6808"
"6809"
"6810"
"6811"
"6812"
"6813"
"6814"
"6815"
"6816"
"6817"
"6818"
"6819"
"6820"
"6821"
"6822"
"6823"
"6824"
"6825"
"6826"
"6827"
"6828"
"6829"
"6830"
"6831"
"6832"
"6833"
"6834"
"6835"
"6836"
"6837"
"6838"
"6839"
"6840"
"6841"
"6842"
"6843"
"6844"
"6845"
"6846"
"6847"
"6848"
"6849"
"6850"
"6851"
"6852"
"6853"
"6854"
"6855"
"6856"
"6857"
"6858"
"6859"
"6860"
"6861"
"6862"
"6863"
"6864"
"6865"
"6866"
"6867"
"6868"
"6869"
"6870"
"6871"
"6872"
"6873"
"6874"
"6875"
"6876"
"6877"
"6878"
"6879"
"6880"
"6881"
"6882"
"6883"
"6884"
"6885"
"6886"
"6887"
"6888"
"6889"
"6890"
"6891"
"6892"
"6893"
"6894"
"6895"
"6896"
"6897"
"6898"
"6899"
"6900"
"6901"
"6902"
"6903"
"6904"
"6905"
"6906"
"6907"
"6908"
"6909"
"6910"
"6911"
"6912"
"6913"
"6914"
"6915"
"6916"
"6917"
"6918"
"6919"
"6920"
"6921"
"6922"
"6923"
"6924"
"6925"
"6926"
"6927"
"6928"
"6929"
"6930"
"6931"
"6932"
"6933"
"6934"
"6935"
"6936"
"6937"
"6938"
"6939"
"6940"
"6941"
"6942"
"6943"
"6944"
"6945"
"6946"
"6947"
"6948"
"6949"
"6950"
"6951"
"6952"
"6953"
"6954"
"6955"
"6956"
"6957"
"6958"
"6959"
"6960"
"6961"
"6962"
"6963"
"6964"
"6965"
"6966"
"6967"
"6968"
"6969"
"6970"
"6971"
"6972"
"6973"
"6974"
"6975"
"6976"
"6977"
"6978"
"6979"
"6980"
"6981"
"6982"
"6983"
"6984"
"6985"
"6986"
"6987"
"6988"
"6989"
"6990"
"6991"
"6992"
"6993"
"6994"
"6995"
"6996"
"6997"
"6998"
"6999"
"7000"
"7001"
"7002"
"7003"
"7004"
"7005"
"7006"
"7007"
"7008"
"7009"
"7010"
"7011"
"7012"
"7013"
"7014"
"7015"
"7016"
"7017"
"7018"
"7019"
"7020"
"7021"
"7022"
"7023"
"7024"
"7025"
"7026"
"7027"
"7028"
"7029"
"7030"
"7031"
"7032"
"7033"
"7034"
"7035"
"7036"
"7037"
"7038"
"7039"
"7040"
"7041"
"7042"
"7043"
"7044"
"7045"
"7046"
"7047"
"7048"
"7049"
"7050"
"7051"
"7052"
"7053"
"7054"
"7055"
"7056"
"7057"
"7058"
"7059"
"7060"
"7061"
"7062"
"7063"
"7064"
"7065"
"7066"
"7067"
"7068"
"7069"
"7070"
"7071"
"7072"
"7073"
"7074"
"7075"
"7076"
"7077"
"7078"
"7079"
"7080"
"7081"
"7082"
"7083"
"7084"
"7085"
"7086"
"7087"
"7088"
"7089"
"7090"
"7091"
"7092"
"7093"
"7094"
"7095"
"7096"
"7097"
"7098"
"7099"
"7100"
"7101"
"7102"
"7103"
"7104"
"7105"
"7106"
"7107"
"7108"
"7109"
"7110"
"7111"
"7112"
"7113"
"7114"
"7115"
"7116"
"7117"
"7118"
"7119"
"7120"
"7121"
"7122"
"7123"
"7124"
"7125"
"7126"
"7127"
"7128"
"7129"
"7130"
"7131"
"7132"
"7133"
"7134"
"7135"
"7136"
"7137"
"7138"
"7139"
"7140"
"7141"
"7142"
"7143"
"7144"
"7145"
"7146"
"7147"
"7148"
"7149"
"7150"
"7151"
"7152"
"7153"
"7154"
"7155"
"7156"
"7157"
"7158"
"7159"
"7160"
"7161"
"7162"
"7163"
"7164"
"7165"
"7166"
"7167"
"7168"
"7169"
"7170"
"7171"
"7172"
"7173"
"7174"
"7175"
"7176"
"7177"
"7178"
"7179"
"7180"
"7181"
"7182"
"7183"
"7184"
"7185"
"7186"
"7187"
"7188"
"7189"
"7190"
"7191"
"7192"
"7193"
"7194"
"7195"
"7196"
"7197"
"7198"
"7199"
"7200"
"7201"
"7202"
"7203"
"7204"
"7205"
"7206"
"7207"
"7208"
"7209"
"7210"
"7211"
"7212"
"7213"
"7214"
"7215"
"7216"
"7217"
"7218"
"7219"
"7220"
"7221"
"7222"
"7223"
"7224"
"7225"
"7226"
"7227"
"7228"
"7229"
"7230"
"7231"
"7232"
"7233"
"7234"
"7235"
"7236"
"7237"
"7238"
"7239"
"7240"
"7241"
"7242"
"7243"
"7244"
"7245"
"7246"
"7247"
"7248"
"7249"
"7250"
"7251"
"7252"
"7253"
"7254"
"7255"
"7256"
"7257"
"7258"
"7259"
"7260"
"7261"
"7262"
"7263"
"7264"
"7265"
"7266"
"7267"
"7268"
"7269"
"7270"
"7271"
"7272"
"7273"
"7274"
"7275"
"7276"
"7277"
"7278"
"7279"
"7280"
"7281"
"7282"
"7283"
"7284"
"7285"
"7286"
"7287"
"7288"
"7289"
"7290"
"7291"
"7292"
"7293"
"7294"
"7295"
"7296"
"7297"
"7298"
"7299"
"7300"
"7301"
"7302"
"7303"
"7304"
"7305"
"7306"
"7307"
"7308"
"7309"
"7310"
"7311"
"7312"
"7313"
"7314"
"7315"
"7316"
"7317"
"7318"
"7319"
"7320"
"7321"
"7322"
"7323"
"7324"
"7325"
"7326"
"7327"
"7328"
"7329"
"7330"
"7331"
"7332"
"7333"
"7334"
"7335"
"7336"
"7337"
"7338"
"7339"
"7340"
"7341"
"7342"
"7343"
"7344"
"7345"
"7346"
"7347"
"7348"
"7349"
"7350"
"7351"
"7352"
"7353"
"7354"
"7355"
"7356"
"7357"
"7358"
"7359"
"7360"
"7361"
"7362"
"7363"
"7364"
"7365"
"7366"
"7367"
"7368"
"7369"
"7370"
"7371"
"7372"
"7373"
"7374"
"7375"
"7376"
"7377"
"7378"
"7379"
"7380"
"7381"
"7382"
"7383"
"7384"
"7385"
"7386"
"7387"
"7388"
"7389"
"7390"
"7391"
"7392"
"7393"
"7394"
"7395"
"7396"
"7397"
"7398"
"7399"
"7400"
"7401"
"7402"
"7403"
"7404"
"7405"
"7406"
"7407"
"7408"
"7409"
"7410"
"7411"
"7412"
"7413"
"7414"
"7415"
"7416"
"7417"
"7418"
"7419"
"7420"
"7421"
"7422"
"7423"
"7424"
"7425"
"7426"
"7427"
"7428"
"7429"
"7430"
"7431"
"7432"
"7433"
"7434"
"7435"
"7436"
"7437"
"7438"
"7439"
"7440"
"7441"
"7442"
"7443"
"7444"
"7445"
"7446"
"7447"
"7448"
"7449"
"7450"
"7451"
"7452"
"7453"
"7454"
"7455"
"7456"
"7457"
"7458"
"7459"
"7460"
"7461"
"7462"
"7463"
"7464"
"7465"
"7466"
"7467"
"7468"
"7469"
"7470"
"7471"
"7472"
"7473"
"7474"
"7475"
"7476"
"7477"
"7478"
"7479"
"7480"
"7481"
"7482"
"7483"
"7484"
"7485"
"7486"
"7487"
"7488"
"7489"
"7490"
"7491"
"7492"
"7493"
"7494"
"7495"
"7496"
"7497"
"7498"
"7499"
"7500"
"7501"
"7502"
"7503"
"7504"
"7505"
"7506"
"7507"
"7508"
"7509"
"7510"
"7511"
"7512"
"7513"
"7514"
"7515"
"7516"
"7517"
"7518"
"7519"
"7520"
"7521"
"7522"
"7523"
"7524"
"7525"
"7526"
"7527"
"7528"
"7529"
"7530"
"7531"
"7532"
"7533"
"7534"
"7535"
"7536"
"7537"
"7538"
"7539"
"7540"
"7541"
"7542"
"7543"
"7544"
"7545"
"7546"
"7547"
"7548"
"7549"
"7550"
"7551"
"7552"
"7553"
"7554"
"7555"
"7556"
"7557"
"7558"
"7559"
"7560"
"7561"
"7562"
"7563"
"7564"
"7565"
"7566"
"7567"
"7568"
"7569"
"7570"
"7571"
"7572"
"7573"
"7574"
"7575"
"7576"
"7577"
"7578"
"7579"
"7580"
"7581"
"7582"
"7583"
"7584"
"7585"
"7586"
"7587"
"7588"
"7589"
"7590"
"7591"
"7592"
"7593"
"7594"
"7595"
"7596"
"7597"
"7598"
"7599"
"7600"
"7601"
"7602"
"7603"
"7604"
"7605"
"7606"
"7607"
"7608"
"7609"
"7610"
"7611"
"7612"
"7613"
"7614"
"7615"
"7616"
"7617"
"7618"
"7619"
"7620"
"7621"
"7622"
"7623"
"7624"
"7625"
"7626"
"7627"
"7628"
"7629"
"7630"
"7631"
"7632"
"7633"
"7634"
"7635"
"7636"
"7637"
"7638"
"7639"
"7640"
"7641"
"7642"
"7643"
"7644"
"7645"
"7646"
"7647"
"7648"
"7649"
"7650"
"7651"
"7652"
"7653"
"7654"
"7655"
"7656"
"7657"
"7658"
"7659"
"7660"
"7661"
"7662"
"7663"
"7664"
"7665"
"7666"
"7667"
"7668"
"7669"
"7670"
"7671"
"7672"
"7673"
"7674"
"7675"
"7676"
"7677"
"7678"
"7679"
"7680"
"7681"
"7682"
"7683"
"7684"
"7685"
"7686"
"7687"
"7688"
"7689"
"7690"
"7691"
"7692"
"7693"
"7694"
"7695"
"7696"
"7697"
"7698"
"7699"
"7700"
"7701"
"7702"
"7703"
"7704"
"7705"
"7706"
"7707"
"7708"
"7709"
"7710"
"7711"
"7712"
"7713"
"7714"
"7715"
"7716"
"7717"
"7718"
"7719"
"7720"
"7721"
"7722"
"7723"
"7724"
"7725"
"7726"
"7727"
"7728"
"7729"
"7730"
"7731"
"7732"
"7733"
"7734"
"7735"
"7736"
"7737"
"7738"
"7739"
"7740"
"7741"
"7742"
"7743"
"7744"
"7745"
"7746"
"7747"
"7748"
"7749"
"7750"
"7751"
"7752"
"7753"
"7754"
"7755"
"7756"
"7757"
"7758"
"7759"
"7760"
"7761"
"7762"
"7763"
"7764"
"7765"
"7766"
"7767"
"7768"
"7769"
"7770"
"7771"
"7772"
"7773"
"7774"
"7775"
"7776"
"7777"
"7778"
"7779"
"7780"
"7781"
"7782"
"7783"
"7784"
"7785"
"7786"
"7787"
"7788"
"7789"
"7790"
"7791"
"7792"
"7793"
"7794"
"7795"
"7796"
"7797"
"7798"
"7799"
"7800"
"7801"
"7802"
"7803"
"7804"
"7805"
"7806"
"7807"
"7808"
"7809"
"7810"
"7811"
"7812"
"7813"
"7814"
"7815"
"7816"
"7817"
"7818"
"7819"
"7820"
"7821"
"7822"
"7823"
"7824"
"7825"
"7826"
"7827"
"7828"
"7829"
"7830"
"7831"
"7832"
"7833"
"7834"
"7835"
"7836"
"7837"
"7838"
"7839"
"7840"
"7841"
"7842"
"7843"
"7844"
"7845"
"7846"
"7847"
"7848"
"7849"
"7850"
"7851"
"7852"
"7853"
"7854"
"7855"
"7856"
"7857"
"7858"
"7859"
"7860"
"7861"
"7862"
"7863"
"7864"
"7865"
"7866"
"7867"
"7868"
"7869"
"7870"
"7871"
"7872"
"7873"
"7874"
"7875"
"7876"
"7877"
"7878"
"7879"
"7880"
"7881"
"7882"
"7883"
"7884"
"7885"
"7886"
"7887"
"7888"
"7889"
"7890"
"7891"
"7892"
"7893"
"7894"
"7895"
"7896"
"7897"
"7898"
"7899"
"7900"
"7901"
"7902"
"7903"
"7904"
"7905"
"7906"
"7907"
"7908"
"7909"
"7910"
"7911"
"7912"
"7913"
"7914"
"7915"
"7916"
"7917"
"7918"
"7919"
"7920"
"7921"
"7922"
"7923"
"7924"
"7925"
"7926"
"7927"
"7928"
"7929"
"7930"
"7931"
"7932"
"7933"
"7934"
"7935"
"7936"
"7937"
"7938"
"7939"
"7940"
"7941"
"7942"
"7943"
"7944"
"7945"
"7946"
"7947"
"7948"
"7949"
"7950"
"7951"
"7952"
"7953"
"7954"
"7955"
"7956"
"7957"
"7958"
"7959"
"7960"
"7961"
"7962"
"7963"
"7964"
"7965"
"7966"
"7967"
"7968"
"7969"
"7970"
"7971"
"7972"
"7973"
"7974"
"7975"
"7976"
"7977"
"7978"
"7979"
"7980"
"7981"
"7982"
"7983"
"7984"
"7985"
"7986"
"7987"
"7988"
"7989"
"7990"
"7991"
"7992"
"7993"
"7994"
"7995"
"7996"
"7997"
"7998"
"7999"
"8000"
"8001"
"8002"
"8003"
"8004"
"8005"
"8006"
"8007"
"8008"
"8009"
"8010"
"8011"
"8012"
"8013"
"8014"
"8015"
"8016"
"8017"
"8018"
"8019"
"8020"
"8021"
"8022"
"8023"
"8024"
"8025"
"8026"
"8027"
"8028"
"8029"
"8030"
"8031"
"8032"
"8033"
"8034"
"8035"
"8036"
"8037"
"8038"
"8039"
"8040"
"8041"
"8042"
"8043"
"8044"
"8045"
"8046"
"8047"
"8048"
"8049"
"8050"
"8051"
"8052"
"8053"
"8054"
"8055"
"8056"
"8057"
"8058"
"8059"
"8060"
"8061"
"8062"
"8063"
"8064"
"8065"
"8066"
"8067"
"8068"
"8069"
"8070"
"8071"
"8072"
"8073"
"8074"
"8075"
"8076"
"8077"
"8078"
"8079"
"8080"
"8081"
"8082"
"8083"
"8084"
"8085"
"8086"
"8087"
"8088"
"8089"
"8090"
"8091"
"8092"
"8093"
"8094"
"8095"
"8096"
"8097"
"8098"
"8099"
"8100"
"8101"
"8102"
"8103"
"8104"
"8105"
"8106"
"8107"
"8108"
"8109"
"8110"
"8111"
"8112"
"8113"
"8114"
"8115"
"8116"
"8117"
"8118"
"8119"
"8120"
"8121"
"8122"
"8123"
"8124"
"8125"
"8126"
"8127"
"8128"
"8129"
"8130"
"8131"
"8132"
"8133"
"8134"
"8135"
"8136"
"8137"
"8138"
"8139"
"8140"
"8141"
"8142"
"8143"
"8144"
"8145"
"8146"
