# Supplementary material for: APP Is a Context-Sensitive Regulator of the Hippocampal Presynaptic Active Zone
Source: PLOS journal article supplement (doi:10.1371/journal.pcbi.1004832), 2016-04-19
Supplement: S6 (10.1371/journal.pcbi.1004832.s006) [file journal.pcbi.1004832.s006.cys › CytoscapeSession-2016_01_22-10_07/tables/4132-Subcommunities/HIDDEN-org.cytoscape.model.CyNode-4132+hidden+node.cytable]

"CyCSV-Version","1"
"SUID"
"java.lang.Long"
""
"4132 hidden node",""
"4142"
"4143"
"4144"
"4145"
"4146"
"4147"
"4148"
"4149"
"4150"
"4151"
"4152"
"4153"
"4154"
"4155"
"4156"
"4157"
"4158"
"4159"
"4160"
"4161"
"4162"
"4163"
"4164"
"4165"
"4166"
"4167"
"4168"
"4169"
"4170"
"4171"
"4172"
"4173"
"4174"
"4175"
"4176"
"4177"
"4178"
"4179"
"4180"
"4181"
"4182"
"4183"
"4184"
"4185"
"4186"
"4187"
"4188"
"4189"
"4190"
"4191"
"4192"
"4193"
"4194"
"4195"
"4196"
"4197"
"4198"
"4199"
"4200"
"4201"
"4202"
"4203"
"4204"
"4205"
"4206"
"4207"
"4208"
"4209"
"4210"
"4211"
"4212"
"4213"
"4214"
"4215"
"4216"
"4217"
"4218"
"4219"
"4220"
"4221"
"4222"
"4223"
"4224"
"4225"
"4226"
"4227"
"4228"
"4229"
"4230"
"4231"
"4232"
"4233"
"4234"
"4235"
"4236"
"4237"
"4238"
"4239"
"4240"
"4241"
"4242"
"4243"
"4244"
"4245"
"4246"
"4247"
"4248"
"4249"
"4250"
"4251"
"4252"
"4253"
"4254"
"4255"
"4256"
"4257"
"4258"
"4259"
"4260"
"4261"
"4262"
"4263"
"4264"
"4265"
"4266"
"4267"
"4268"
"4269"
"4270"
"4271"
"4272"
"4273"
"4274"
"4275"
"4276"
"4277"
"4278"
"4279"
"4280"
"4281"
"4282"
"4283"
"4284"
"4285"
"4286"
"4287"
"4288"
"4289"
"4290"
"4291"
"4292"
"4293"
"4294"
"4295"
"4296"
"4297"
"4298"
"4299"
"4300"
"4301"
"4302"
"4303"
"4304"
"4305"
"4306"
"4307"
"4308"
"4309"
"4310"
"4311"
"4312"
"4313"
"4314"
"4315"
"4316"
"4317"
"4318"
"4319"
"4320"
"4321"
"4322"
"4323"
"4324"
"4325"
"4326"
"4327"
"4328"
"4329"
"4330"
"4331"
"4332"
"4333"
"4334"
"4335"
"4336"
"4337"
"4338"
"4339"
"4340"
"4341"
"4342"
"4343"
"4344"
"4345"
"4346"
"4347"
"4348"
"4349"
"4350"
"4351"
"4352"
"4353"
"4354"
"4355"
"4356"
"4357"
"4358"
"4359"
"4360"
"4361"
"4362"
"4363"
"4364"
"4365"
"4366"
"4367"
"4368"
"4369"
"4370"
"4371"
"4372"
"4373"
"4374"
"4375"
"4376"
"4377"
"4378"
"4379"
"4380"
"4381"
"4382"
"4383"
"4384"
"4385"
"4386"
"4387"
"4388"
"4389"
"4390"
"4391"
"4392"
"4393"
"4394"
"4395"
"4396"
"4397"
"4398"
"4399"
"4400"
"4401"
"4402"
"4403"
"4404"
"4405"
"4406"
"4407"
"4408"
"4409"
"4410"
"4411"
"4412"
"4413"
"4414"
"4415"
"4416"
"4417"
"4418"
"4419"
"4420"
"4421"
"4422"
"4423"
"4424"
"4425"
"4426"
"4427"
"4428"
"4429"
"4430"
"4431"
"4432"
"4433"
"4434"
"4435"
"4436"
"4437"
"4438"
"4439"
"4440"
"4441"
"4442"
"4443"
"4444"
"4445"
"4446"
"4447"
"4448"
"4449"
"4450"
"4451"
"4452"
"4453"
"4454"
"4455"
"4456"
"4457"
"4458"
"4459"
"4460"
"4461"
"4462"
"4463"
"4464"
"4465"
"4466"
"4467"
"4468"
"4469"
"4470"
"4471"
"4472"
"4473"
"4474"
"4475"
"4476"
"4477"
"4478"
"4479"
"4480"
"4481"
"4482"
"4483"
"4484"
"4485"
"4486"
"4487"
"4488"
"4489"
"4490"
"4491"
"4492"
"4493"
"4494"
"4495"
"4496"
"4497"
"4498"
"4499"
"4500"
"4501"
"4502"
"4503"
"4504"
"4505"
"4506"
"4507"
"4508"
"4509"
"4510"
"4511"
"4512"
"4513"
"4514"
"4515"
"4516"
"4517"
"4518"
"4519"
"4520"
"4521"
"4522"
"4523"
"4524"
"4525"
"4526"
"4527"
"4528"
"4529"
"4530"
"4531"
"4532"
"4533"
"4534"
"4535"
"4536"
"4537"
"4538"
"4539"
"4540"
"4541"
"4542"
"4543"
"4544"
"4545"
"4546"
"4547"
"4548"
"4549"
"4550"
"4551"
"4552"
"4553"
"4554"
"4555"
"4556"
"4557"
"4558"
"4559"
"4560"
"4561"
"4562"
"4563"
"4564"
"4565"
"4566"
"4567"
"4568"
"4569"
"4570"
"4571"
"4572"
"4573"
"4574"
"4575"
"4576"
"4577"
"4578"
"4579"
"4580"
"4581"
"4582"
"4583"
"4584"
"4585"
"4586"
"4587"
"4588"
"4589"
"4590"
"4591"
"4592"
"4593"
"4594"
"4595"
"4596"
"4597"
"4598"
"4599"
"4600"
"4601"
"4602"
"4603"
"4604"
"4605"
"4606"
"4607"
"4608"
"4609"
"4610"
"4611"
"4612"
"4613"
"4614"
"4615"
"4616"
"4617"
"4618"
"4619"
"4620"
"4621"
"4622"
"4623"
"4624"
"4625"
"4626"
"4627"
"4628"
"4629"
"4630"
"4631"
"4632"
"4633"
"4634"
"4635"
"4636"
"4637"
"4638"
"4639"
"4640"
"4641"
"4642"
"4643"
"4644"
"4645"
"4646"
"4647"
"4648"
"4649"
"4650"
"4651"
"4652"
"4653"
"4654"
"4655"
"4656"
"4657"
"4658"
"4659"
"4660"
"4661"
"4662"
"4663"
"4664"
"4665"
"4666"
"4667"
"4668"
"4669"
"4670"
"4671"
"4672"
"4673"
"4674"
"4675"
"4676"
"4677"
"4678"
"4679"
"4680"
"4681"
"4682"
"4683"
"4684"
"4685"
"4686"
"4687"
"4688"
"4689"
"4690"
"4691"
"4692"
"4693"
"4694"
"4695"
"4696"
"4697"
"4698"
"4699"
"4700"
"4701"
"4702"
"4703"
"4704"
"4705"
"4706"
"4707"
"4708"
"4709"
"4710"
"4711"
"4712"
"4713"
"4714"
"4715"
"4716"
"4717"
"4718"
"4719"
"4720"
"4721"
"4722"
"4723"
"4724"
"4725"
"4726"
"4727"
"4728"
"4729"
"4730"
"4731"
"4732"
"4733"
"4734"
"4735"
"4736"
"4737"
"4738"
"4739"
"4740"
"4741"
"4742"
"4743"
"4744"
"4745"
"4746"
"4747"
"4748"
"4749"
"4750"
"4751"
"4752"
"4753"
"4754"
"4755"
"4756"
