# Supplementary material for: APP Is a Context-Sensitive Regulator of the Hippocampal Presynaptic Active Zone
Source: PLOS journal article supplement (doi:10.1371/journal.pcbi.1004832), 2016-04-19
Supplement: S6 (10.1371/journal.pcbi.1004832.s006) [file journal.pcbi.1004832.s006.cys › CytoscapeSession-2016_01_22-10_07/tables/4132-Subcommunities/LOCAL_ATTRS-org.cytoscape.model.CyEdge-Subcommunities+default+edge.cytable]

CyCSV-Version	1
SUID	interaction	name	selected
java.lang.Long	java.lang.String	java.lang.String	java.lang.Boolean
Subcommunities default edge
4757	pp	Q01097 (pp) Q80Z38	false
4758	pp	Q01097 (pp) P05132	false
4759	pp	Q01097 (pp) P15105	false
4760	pp	Q01097 (pp) O35526	false
4761	pp	Q01097 (pp) P51881	false
4762	pp	Q01097 (pp) P68510	false
4763	pp	Q01097 (pp) Q60676	false
4764	pp	Q01097 (pp) P12367	false
4765	pp	Q01097 (pp) P63085	false
4766	pp	Q01097 (pp) P47754	false
4767	pp	Q01097 (pp) Q03265	false
4768	pp	Q01097 (pp) P62835	false
4769	pp	Q01097 (pp) Q6PHZ2	false
4770	pp	Q01097 (pp) Q9D6M3	false
4771	pp	Q01097 (pp) P63101	false
4772	pp	Q01097 (pp) P17426	false
4773	pp	Q01097 (pp) P68033	false
4774	pp	Q01097 (pp) P68369	false
4775	pp	Q01097 (pp) P47757	false
4776	pp	Q01097 (pp) P05063	false
4777	pp	Q01097 (pp) P20357	false
4778	pp	Q01097 (pp) P31938	false
4779	pp	Q01097 (pp) P16054	false
4780	pp	Q01097 (pp) P51863	false
4781	pp	Q01097 (pp) P16858	false
4782	pp	Q01097 (pp) P06151	false
4783	pp	Q01097 (pp) P60879	false
4784	pp	Q01097 (pp) O88952	false
4785	pp	Q01097 (pp) P05480	false
4786	pp	Q01097 (pp) P50516	false
4787	pp	Q01097 (pp) P63318	false
4788	pp	Q01097 (pp) P97772	false
4789	pp	Q01097 (pp) P68404	false
4790	pp	Q01097 (pp) O55100	false
4791	pp	Q01097 (pp) Q91VR2	false
4792	pp	Q01097 (pp) P35279	false
4793	pp	Q01097 (pp) P63321	false
4794	pp	Q01097 (pp) P61982	false
4795	pp	Q01097 (pp) P60710	false
4796	pp	Q01097 (pp) P08553	false
4797	pp	Q01097 (pp) P62204	false
4798	pp	Q01097 (pp) Q61411	false
4799	pp	Q01097 (pp) P62259	false
4800	pp	Q01097 (pp) P48962	false
4801	pp	Q01097 (pp) O08599	false
4802	pp	Q01097 (pp) Q923T9	false
4803	pp	Q01097 (pp) Q9JM76	false
4804	pp	Q01097 (pp) P46096	false
4805	pp	Q01097 (pp) P63328	false
4806	pp	Q01097 (pp) P63001	false
4807	pp	Q01097 (pp) P59999	false
4808	pp	Q01097 (pp) F6SEU4	false
4809	pp	Q01097 (pp) P63011	false
4810	pp	Q01097 (pp) Q8BH59	false
4811	pp	Q01097 (pp) P17751	false
4812	pp	Q01097 (pp) O88737	false
4813	pp	Q01097 (pp) P06837	false
4814	pp	Q01097 (pp) P43006	false
4815	pp	Q01097 (pp) Q9CVB6	false
4816	pp	Q01097 (pp) P08551	false
4817	pp	Q01097 (pp) P11627	false
4818	pp	Q01097 (pp) P13020	false
4819	pp	Q01097 (pp) P05202	false
4820	pp	Q01097 (pp) P62874	false
4821	pp	Q01097 (pp) P35438	false
4822	pp	Q01097 (pp) P30999	false
4823	pp	Q01097 (pp) D3YVF0	false
4824	pp	Q01097 (pp) Q9QXS6	false
4825	pp	Q01097 (pp) P39053	false
4826	pp	Q01097 (pp) P63330	false
4827	pp	Q01097 (pp) P46660	false
4828	pp	Q01097 (pp) P53994	false
4829	pp	Q01097 (pp) P35436	false
4830	pp	Q01097 (pp) O35129	false
4831	pp	Q01097 (pp) P68181	false
4832	pp	Q01097 (pp) Q61879	false
4833	pp	Q01097 (pp) P31324	false
4834	pp	Q01097 (pp) P57780	false
4835	pp	Q01097 (pp) P15116	false
4836	pp	Q01097 (pp) A2CG49	false
4837	pp	Q01097 (pp) P12382	false
4838	pp	Q80Z38 (pp) Q8BYM5	false
4839	pp	Q80Z38 (pp) P35438	false
4840	pp	Q9CQZ5 (pp) Q9D6J6	false
4841	pp	Q9CQZ5 (pp) P48771	false
4842	pp	Q9CQZ5 (pp) Q91VR2	false
4843	pp	Q9CQZ5 (pp) Q91VD9	false
4844	pp	Q9CQZ5 (pp) Q9CPP6	false
4845	pp	Q9CQZ5 (pp) Q9CQZ6	false
4846	pp	Q9CQZ5 (pp) P19536	false
4847	pp	Q9CQZ5 (pp) O09111	false
4848	pp	Q9CQZ5 (pp) P97450	false
4849	pp	Q9CQZ5 (pp) Q91YT0	false
4850	pp	Q9CQZ5 (pp) Q9CQ69	false
4851	pp	Q9CQZ5 (pp) Q99LC5	false
4852	pp	Q9CQZ5 (pp) P99029	false
4853	pp	Q9CQZ5 (pp) Q9CPQ8	false
4854	pp	Q9CQZ5 (pp) Q9CQC7	false
4855	pp	Q9CQZ5 (pp) Q3UIU2	false
4856	pp	Q9CQZ5 (pp) Q9CQQ7	false
4857	pp	Q9CQZ5 (pp) Q62425	false
4858	pp	Q9CQZ5 (pp) Q9CR68	false
4859	pp	Q9CQZ5 (pp) Q9CZ13	false
4860	pp	Q9CQZ5 (pp) Q9DC69	false
4861	pp	Q9CQZ5 (pp) Q9D0S9	false
4862	pp	Q9CQZ5 (pp) Q99LC3	false
4863	pp	Q9CQZ5 (pp) Q9D6J5	false
4864	pp	Q9CQZ5 (pp) Q9DCS9	false
4865	pp	Q9CQZ5 (pp) Q06185	false
4866	pp	Q9CQZ5 (pp) Q9DCX2	false
4867	pp	Q9CQZ5 (pp) Q9DB20	false
4868	pp	Q9CQZ5 (pp) Q9CQ54	false
4869	pp	Q9CQZ5 (pp) Q9D3D9	false
4870	pp	Q9CQZ5 (pp) Q9ERS2	false
4871	pp	Q9CQZ5 (pp) Q9WUM5	false
4872	pp	Q9CQZ5 (pp) Q9DCJ5	false
4873	pp	Q9CQZ5 (pp) Q8K3J1	false
4874	pp	Q9CQZ5 (pp) Q9D0M3	false
4875	pp	Q9CQZ5 (pp) Q99LX0	false
4876	pp	Q9CQZ5 (pp) Q9CQH3	false
4877	pp	Q9CQZ5 (pp) Q9DB77	false
4878	pp	Q9CQZ5 (pp) Q9Z1P6	false
4879	pp	Q9D6J6 (pp) Q01097	false
4880	pp	O08749 (pp) Q9D051	false
4881	pp	O08749 (pp) P97807	false
4882	pp	O08749 (pp) Q91YT0	false
4883	pp	O08749 (pp) Q03265	false
4884	pp	O08749 (pp) Q99LC5	false
4885	pp	O08749 (pp) Q6PB66	false
4886	pp	O08749 (pp) Q60931	false
4887	pp	O08749 (pp) Q99KI0	false
4888	pp	O08749 (pp) Q9Z2I9	false
4889	pp	O08749 (pp) Q9WUM5	false
4890	pp	O08749 (pp) Q60597	false
4891	pp	O08749 (pp) Q9D6J6	false
4892	pp	O08749 (pp) Q8BKZ9	false
4893	pp	O08749 (pp) Q8BMF4	false
4894	pp	O08749 (pp) P63038	false
4895	pp	O08749 (pp) P99029	false
4896	pp	O08749 (pp) O88441	false
4897	pp	O08749 (pp) Q91VD9	false
4898	pp	O08749 (pp) Q9CQH3	false
4899	pp	O08749 (pp) P09671	false
4900	pp	O08749 (pp) Q91VR2	false
4901	pp	O08749 (pp) Q8K2B3	false
4902	pp	O08749 (pp) Q9CZU6	false
4903	pp	O08749 (pp) Q9CQA3	false
4904	pp	O08749 (pp) P52480	false
4905	pp	O08749 (pp) Q9DB77	false
4906	pp	O08749 (pp) P08249	false
4907	pp	O08749 (pp) Q9D2G2	false
4908	pp	O08749 (pp) Q9D6R2	false
4909	pp	O08749 (pp) P35486	false
4910	pp	O08749 (pp) Q91ZJ5	false
4911	pp	O08749 (pp) Q9DC69	false
4912	pp	O08749 (pp) P56480	false
4913	pp	Q9D051 (pp) Q03265	false
4914	pp	Q9D051 (pp) Q91VD9	false
4915	pp	Q9D051 (pp) Q8BMF4	false
4916	pp	Q9D051 (pp) Q9DB77	false
4917	pp	Q9D051 (pp) P63101	false
4918	pp	Q9D051 (pp) Q9CQQ7	false
4919	pp	Q9D051 (pp) P52480	false
4920	pp	Q9D051 (pp) Q9D6R2	false
4921	pp	Q9D051 (pp) P40142	false
4922	pp	Q9D051 (pp) P16054	false
4923	pp	Q9D051 (pp) P06151	false
4924	pp	Q9D051 (pp) P97450	false
4925	pp	Q9D051 (pp) Q8BMF3	false
4926	pp	Q9D051 (pp) P97807	false
4927	pp	Q9D051 (pp) Q9CQH3	false
4928	pp	Q9D051 (pp) Q9D0M3	false
4929	pp	Q9D051 (pp) Q9D2G2	false
4930	pp	Q9D051 (pp) Q9CR68	false
4931	pp	Q9D051 (pp) Q05920	false
4932	pp	Q9D051 (pp) Q9DCJ5	false
4933	pp	Q9D051 (pp) Q99LC5	false
4934	pp	Q9D051 (pp) P35486	false
4935	pp	Q9D051 (pp) Q93092	false
4936	pp	Q9D051 (pp) P06745	false
4937	pp	Q9D3D9 (pp) O09111	false
4938	pp	Q9D3D9 (pp) Q9ERS2	false
4939	pp	Q9D3D9 (pp) Q9CQH3	false
4940	pp	Q9D3D9 (pp) Q91VR2	false
4941	pp	Q9D3D9 (pp) Q99LY9	false
4942	pp	Q9D3D9 (pp) Q9D6J6	false
4943	pp	O09111 (pp) Q9CQH3	false
4944	pp	O09111 (pp) Q9D6J6	false
4945	pp	Q03265 (pp) P68510	false
4946	pp	Q03265 (pp) Q91VM9	false
4947	pp	Q03265 (pp) Q9DC69	false
4948	pp	Q03265 (pp) Q9CR68	false
4949	pp	Q03265 (pp) Q9DCX2	false
4950	pp	Q03265 (pp) Q91VD9	false
4951	pp	Q03265 (pp) Q9CZ13	false
4952	pp	Q03265 (pp) P97807	false
4953	pp	Q03265 (pp) P16054	false
4954	pp	Q03265 (pp) P09411	false
4955	pp	Q03265 (pp) Q8K3J1	false
4956	pp	Q03265 (pp) Q99LC5	false
4957	pp	Q03265 (pp) Q9R0Y5	false
4958	pp	Q03265 (pp) Q91VR2	false
4959	pp	Q03265 (pp) Q91YT0	false
4960	pp	Q03265 (pp) Q9WUM5	false
4961	pp	Q03265 (pp) Q06185	false
4962	pp	Q03265 (pp) Q9DB77	false
4963	pp	Q03265 (pp) P63038	false
4964	pp	Q03265 (pp) Q60931	false
4965	pp	Q03265 (pp) Q8VEM8	false
4966	pp	Q03265 (pp) Q9D2G2	false
4967	pp	Q03265 (pp) Q9D3D9	false
4968	pp	Q03265 (pp) P48962	false
4969	pp	Q03265 (pp) P19536	false
4970	pp	Q03265 (pp) P03930	false
4971	pp	Q03265 (pp) Q9CQQ7	false
4972	pp	Q03265 (pp) O35143	false
4973	pp	Q03265 (pp) Q9D6J6	false
4974	pp	Q03265 (pp) Q9CQH3	false
4975	pp	Q03265 (pp) P43024	false
4976	pp	P68510 (pp) P05202	false
4977	pp	P68510 (pp) P17751	false
4978	pp	P68510 (pp) Q99PT1	false
4979	pp	P68510 (pp) P68368	false
4980	pp	P68510 (pp) Q9D8B3	false
4981	pp	P68510 (pp) Q9CQ92	false
4982	pp	P68510 (pp) Q91VZ6	false
4983	pp	P68510 (pp) Q8VBV7	false
4984	pp	P68510 (pp) P08249	false
4985	pp	P68510 (pp) Q61553	false
4986	pp	P68510 (pp) P67871	false
4987	pp	P68510 (pp) O55042	false
4988	pp	P68510 (pp) P10637	false
4989	pp	P68510 (pp) P61164	false
4990	pp	P68510 (pp) Q9R0Q6	false
4991	pp	P68510 (pp) P63101	false
4992	pp	P68510 (pp) P48036	false
4993	pp	P68510 (pp) P50518	false
4994	pp	P68510 (pp) P12787	false
4995	pp	P68510 (pp) Q9CWS0	false
4996	pp	P68510 (pp) Q68FD5	false
4997	pp	P68510 (pp) P54071	false
4998	pp	P68510 (pp) Q9ERS2	false
4999	pp	P68510 (pp) P42208	false
5000	pp	P68510 (pp) P46460	false
5001	pp	P68510 (pp) Q60930	false
5002	pp	P68510 (pp) Q9DCW4	false
5003	pp	P68510 (pp) Q9WV55	false
5004	pp	P68510 (pp) P11499	false
5005	pp	P68510 (pp) Q9D051	false
5006	pp	P68510 (pp) P56480	false
5007	pp	P68510 (pp) Q9CQW1	false
5008	pp	P68510 (pp) Q9DCJ5	false
5009	pp	P68510 (pp) P62259	false
5010	pp	P12382 (pp) P35438	false
5011	pp	P12382 (pp) P17710	false
5012	pp	P12382 (pp) P05063	false
5013	pp	P12382 (pp) P05064	false
5014	pp	P12382 (pp) Q93092	false
5015	pp	P12382 (pp) P63101	false
5016	pp	P12382 (pp) P06745	false
5017	pp	P12382 (pp) P52480	false
5018	pp	P12382 (pp) P47857	false
5019	pp	P12382 (pp) P17751	false
5020	pp	P35438 (pp) P28652	false
5021	pp	P35438 (pp) Q6PIC6	false
5022	pp	P35438 (pp) Q60631	false
5023	pp	P35438 (pp) P68033	false
5024	pp	P35438 (pp) P06837	false
5025	pp	P35438 (pp) P68368	false
5026	pp	P35438 (pp) P62259	false
5027	pp	P35438 (pp) O55100	false
5028	pp	P35438 (pp) P57780	false
5029	pp	P35438 (pp) Q8BMF4	false
5030	pp	P35438 (pp) Q6URW6	false
5031	pp	P35438 (pp) O88737	false
5032	pp	P35438 (pp) A2CG49	false
5033	pp	P35438 (pp) P63017	false
5034	pp	P35438 (pp) P12367	false
5035	pp	P35438 (pp) O35526	false
5036	pp	P35438 (pp) F6SEU4	false
5037	pp	P35438 (pp) P11627	false
5038	pp	P05202 (pp) P54071	false
5039	pp	P05202 (pp) Q9D6R2	false
5040	pp	P05202 (pp) Q60597	false
5041	pp	P05202 (pp) Q05920	false
5042	pp	P05202 (pp) Q8BH04	false
5043	pp	P05202 (pp) P06151	false
5044	pp	P05202 (pp) P70404	false
5045	pp	Q9QUI0 (pp) Q06335	false
5046	pp	Q9QUI0 (pp) Q99PT1	false
5047	pp	Q9QUI0 (pp) P30999	false
5048	pp	Q9QUI0 (pp) P63001	false
5049	pp	Q9QUI0 (pp) O88643	false
5050	pp	Q06335 (pp) Q9QXJ1	false
5051	pp	Q06335 (pp) P63330	false
5052	pp	Q06335 (pp) P04925	false
5053	pp	Q06335 (pp) P12023	false
5054	pp	Q06335 (pp) P63001	false
5055	pp	Q06335 (pp) Q03157	false
5056	pp	P23819 (pp) P35436	false
5057	pp	P23819 (pp) P68369	false
5058	pp	P23819 (pp) P99024	false
5059	pp	P23819 (pp) O08599	false
5060	pp	P23819 (pp) P38647	false
5061	pp	P23819 (pp) P16330	false
5062	pp	P35436 (pp) P35438	false
5063	pp	Q9CZU6 (pp) Q9DCD0	false
5064	pp	Q9CZU6 (pp) Q91VD9	false
5065	pp	Q9CZU6 (pp) P05202	false
5066	pp	Q9CZU6 (pp) Q8BKZ9	false
5067	pp	Q9CZU6 (pp) Q8BMF3	false
5068	pp	Q9CZU6 (pp) P26443	false
5069	pp	Q9CZU6 (pp) P08249	false
5070	pp	Q9CZU6 (pp) Q91VR2	false
5071	pp	Q9CZU6 (pp) P97807	false
5072	pp	Q9CZU6 (pp) P06151	false
5073	pp	Q9CZU6 (pp) Q8K2B3	false
5074	pp	Q9CZU6 (pp) Q99KI0	false
5075	pp	Q9CZU6 (pp) Q8BWT1	false
5076	pp	Q9CZU6 (pp) Q91WD5	false
5077	pp	Q9CZU6 (pp) Q91YT0	false
5078	pp	Q9CZU6 (pp) Q03265	false
5079	pp	Q9CZU6 (pp) P52480	false
5080	pp	Q9CZU6 (pp) P09671	false
5081	pp	Q9CZU6 (pp) Q9D0M3	false
5082	pp	Q9CZU6 (pp) Q9CQA3	false
5083	pp	Q9CZU6 (pp) Q99JY0	false
5084	pp	Q9CZU6 (pp) Q8BMF4	false
5085	pp	Q9CZU6 (pp) Q8BH04	false
5086	pp	Q9CZU6 (pp) P35486	false
5087	pp	Q9CZU6 (pp) Q8BGH2	false
5088	pp	Q9CZU6 (pp) Q60597	false
5089	pp	Q9CZU6 (pp) Q9DB20	false
5090	pp	Q9CZU6 (pp) Q9D6R2	false
5091	pp	Q9CZU6 (pp) P70404	false
5092	pp	Q9CZU6 (pp) Q9WUM5	false
5093	pp	Q9CZU6 (pp) Q8QZT1	false
5094	pp	Q9CZU6 (pp) P56480	false
5095	pp	Q9CZU6 (pp) Q9D2G2	false
5096	pp	Q9CZU6 (pp) Q05920	false
5097	pp	Q9CZU6 (pp) Q9D6J6	false
5098	pp	Q9CZU6 (pp) Q9CZ13	false
5099	pp	Q9CZU6 (pp) Q9CR68	false
5100	pp	Q9CZU6 (pp) P19096	false
5101	pp	Q9DCD0 (pp) Q9D0F9	false
5102	pp	Q9DCD0 (pp) Q8BMS1	false
5103	pp	Q9DCD0 (pp) Q91ZJ5	false
5104	pp	Q9DCD0 (pp) P06151	false
5105	pp	Q9DCD0 (pp) Q8CAQ8	false
5106	pp	P51863 (pp) Q9Z1G3	false
5107	pp	P51863 (pp) P63082	false
5108	pp	P51863 (pp) Q8BVE3	false
5109	pp	P51863 (pp) P50516	false
5110	pp	P51863 (pp) P57746	false
5111	pp	P51863 (pp) Q9Z1G4	false
5112	pp	P51863 (pp) Q9EPJ9	false
5113	pp	P51863 (pp) P50518	false
5114	pp	P51863 (pp) Q9WTT4	false
5115	pp	Q9Z1G3 (pp) P62331	false
5116	pp	Q9Z1G3 (pp) Q9WTT4	false
5117	pp	Q9Z1G3 (pp) Q9Z1G4	false
5118	pp	Q9Z1G3 (pp) P50516	false
5119	pp	Q9Z1G3 (pp) Q91VM9	false
5120	pp	Q9Z1G3 (pp) Q8BVE3	false
5121	pp	Q9Z1G3 (pp) P63082	false
5122	pp	Q9Z1G3 (pp) P23506	false
5123	pp	P62259 (pp) P47757	false
5124	pp	P62259 (pp) P46660	false
5125	pp	P62259 (pp) Q9JLM8	false
5126	pp	P62259 (pp) O88935	false
5127	pp	P62259 (pp) P10637	false
5128	pp	P62259 (pp) P63101	false
5129	pp	P62259 (pp) Q9QWI6	false
5130	pp	P62259 (pp) P16858	false
5131	pp	P62259 (pp) Q9DC28	false
5132	pp	P62259 (pp) Q03265	false
5133	pp	P62259 (pp) P30999	false
5134	pp	P62259 (pp) Q61316	false
5135	pp	P62259 (pp) Q68FF6	false
5136	pp	P62259 (pp) Q3UTJ2	false
5137	pp	P62259 (pp) Q812A2	false
5138	pp	P47757 (pp) O89053	false
5139	pp	Q8C8R3 (pp) P16546	false
5140	pp	Q8C8R3 (pp) P11627	false
5141	pp	P16546 (pp) Q9CQV8	false
5142	pp	P16546 (pp) O08788	false
5143	pp	P63330 (pp) Q76MZ3	false
5144	pp	P63330 (pp) Q60996	false
5145	pp	P63330 (pp) Q61151	false
5146	pp	P63330 (pp) P35438	false
5147	pp	P63330 (pp) Q6P1F6	false
5148	pp	Q76MZ3 (pp) Q6P1F6	false
5149	pp	Q76MZ3 (pp) O08788	false
5150	pp	Q76MZ3 (pp) P63101	false
5151	pp	Q76MZ3 (pp) P35438	false
5152	pp	Q76MZ3 (pp) Q99KJ8	false
5153	pp	Q76MZ3 (pp) Q60996	false
5154	pp	Q76MZ3 (pp) P50396	false
5155	pp	Q76MZ3 (pp) P62259	false
5156	pp	Q76MZ3 (pp) P61982	false
5157	pp	Q76MZ3 (pp) P18052	false
5158	pp	Q76MZ3 (pp) Q61151	false
5159	pp	Q76MZ3 (pp) Q9DC28	false
5160	pp	Q9CQZ6 (pp) Q9CQ54	false
5161	pp	Q9CQZ6 (pp) Q99LC3	false
5162	pp	Q9CQZ6 (pp) Q3UIU2	false
5163	pp	Q9CQZ6 (pp) Q9CQH3	false
5164	pp	Q9CQZ6 (pp) Q9CR68	false
5165	pp	Q9CQZ6 (pp) Q9DCS9	false
5166	pp	Q9CQZ6 (pp) Q06185	false
5167	pp	Q9CQZ6 (pp) Q9D6J6	false
5168	pp	Q9CQZ6 (pp) Q9WUM5	false
5169	pp	Q9CQZ6 (pp) Q62425	false
5170	pp	Q9CQZ6 (pp) Q9ERS2	false
5171	pp	Q9CQZ6 (pp) Q8K3J1	false
5172	pp	Q9CQZ6 (pp) Q91YT0	false
5173	pp	Q9CQZ6 (pp) Q91VR2	false
5174	pp	Q9CQZ6 (pp) Q99LY9	false
5175	pp	Q9CQZ6 (pp) Q9DCX2	false
5176	pp	Q9CQZ6 (pp) Q9DB77	false
5177	pp	Q9CQZ6 (pp) P56391	false
5178	pp	Q9CQZ6 (pp) Q9DC69	false
5179	pp	Q9CQZ6 (pp) Q9Z1P6	false
5180	pp	Q9CQZ6 (pp) Q9CPQ8	false
5181	pp	Q9CQZ6 (pp) Q99LC5	false
5182	pp	Q9CQZ6 (pp) Q9DCJ5	false
5183	pp	Q9CQZ6 (pp) P48771	false
5184	pp	Q9CQZ6 (pp) Q9CQQ7	false
5185	pp	Q9CQZ6 (pp) Q99LX0	false
5186	pp	Q9CQZ6 (pp) Q9CQ69	false
5187	pp	Q9CQ54 (pp) Q91YT0	false
5188	pp	Q9CQ54 (pp) O09111	false
5189	pp	Q9CQ54 (pp) Q9DC69	false
5190	pp	Q9CQ54 (pp) Q9CQQ7	false
5191	pp	Q9CQ54 (pp) Q9DCJ5	false
5192	pp	Q9CQ54 (pp) Q06185	false
5193	pp	Q9CQ54 (pp) Q8K3J1	false
5194	pp	Q9CQ54 (pp) Q9CQ69	false
5195	pp	Q9CQ54 (pp) Q9D6J6	false
5196	pp	Q9CQ54 (pp) Q9DCS9	false
5197	pp	Q9CQ54 (pp) Q99LY9	false
5198	pp	Q9CQ54 (pp) Q9CQH3	false
5199	pp	Q9CQ54 (pp) Q9Z1P6	false
5200	pp	Q9CQ54 (pp) Q3UIU2	false
5201	pp	Q9DCT2 (pp) Q9CQ69	false
5202	pp	Q9DCT2 (pp) P19783	false
5203	pp	Q9DCT2 (pp) Q99LC3	false
5204	pp	Q9DCT2 (pp) O70325	false
5205	pp	Q9DCT2 (pp) Q9CQA3	false
5206	pp	Q9DCT2 (pp) Q8K1Z0	false
5207	pp	Q9DCT2 (pp) P19536	false
5208	pp	Q9DCT2 (pp) Q9DC70	false
5209	pp	Q9DCT2 (pp) Q3UIU2	false
5210	pp	Q9DCT2 (pp) Q9DB77	false
5211	pp	Q9DCT2 (pp) Q9CQQ7	false
5212	pp	Q9DCT2 (pp) Q9D6J6	false
5213	pp	Q9DCT2 (pp) Q9DCS9	false
5214	pp	Q9DCT2 (pp) Q9D3D9	false
5215	pp	Q9DCT2 (pp) P48771	false
5216	pp	Q9DCT2 (pp) P17751	false
5217	pp	Q9DCT2 (pp) Q8K3J1	false
5218	pp	Q9DCT2 (pp) Q91WD5	false
5219	pp	Q9DCT2 (pp) Q9D6J5	false
5220	pp	Q9DCT2 (pp) P56391	false
5221	pp	Q9DCT2 (pp) Q9ERS2	false
5222	pp	Q9DCT2 (pp) Q03265	false
5223	pp	Q9DCT2 (pp) Q8BGH2	false
5224	pp	Q9DCT2 (pp) Q9CQC7	false
5225	pp	Q9DCT2 (pp) Q9WUM5	false
5226	pp	Q9DCT2 (pp) Q9CQJ8	false
5227	pp	Q9DCT2 (pp) Q9CXZ1	false
5228	pp	Q9DCT2 (pp) Q99LC5	false
5229	pp	Q9DCT2 (pp) Q99LY9	false
5230	pp	Q9DCT2 (pp) Q7TMF3	false
5231	pp	Q9DCT2 (pp) Q9CR68	false
5232	pp	Q9DCT2 (pp) P42125	false
5233	pp	Q9DCT2 (pp) Q9CQZ6	false
5234	pp	Q9DCT2 (pp) P99029	false
5235	pp	Q9DCT2 (pp) Q9D051	false
5236	pp	Q9DCT2 (pp) Q9DC69	false
5237	pp	Q9DCT2 (pp) Q9D855	false
5238	pp	Q9DCT2 (pp) Q9DCX2	false
5239	pp	Q9DCT2 (pp) Q9CQR4	false
5240	pp	Q9DCT2 (pp) Q9DCJ5	false
5241	pp	Q9DCT2 (pp) P09671	false
5242	pp	Q9DCT2 (pp) P56480	false
5243	pp	Q9DCT2 (pp) Q8K2B3	false
5244	pp	Q9DCT2 (pp) Q9CQ75	false
5245	pp	Q9DCT2 (pp) P52503	false
5246	pp	Q9DCT2 (pp) Q91VD9	false
5247	pp	Q9DCT2 (pp) Q8BH95	false
5248	pp	Q9DCT2 (pp) Q91YT0	false
5249	pp	Q9DCT2 (pp) P56379	false
5250	pp	Q9DCT2 (pp) Q9CZ13	false
5251	pp	Q9DCT2 (pp) Q9DB20	false
5252	pp	Q9DCT2 (pp) Q8VEM8	false
5253	pp	Q9DCT2 (pp) Q9CPP6	false
5254	pp	Q9DCT2 (pp) Q9CQ54	false
5255	pp	Q9DCT2 (pp) Q9D0M3	false
5256	pp	Q9DCT2 (pp) Q99KI0	false
5257	pp	Q9DCT2 (pp) Q91VR2	false
5258	pp	Q9DCT2 (pp) O88441	false
5259	pp	Q9DCT2 (pp) Q9CQH3	false
5260	pp	Q9DCT2 (pp) Q62425	false
5261	pp	Q9DCT2 (pp) O09111	false
5262	pp	Q9DCT2 (pp) P68510	false
5263	pp	Q9DCT2 (pp) P62073	false
5264	pp	Q9DCT2 (pp) P08249	false
5265	pp	Q9DCT2 (pp) Q9CPQ1	false
5266	pp	Q9DCT2 (pp) Q9D0S9	false
5267	pp	Q9DCT2 (pp) P50516	false
5268	pp	Q9DCT2 (pp) P97807	false
5269	pp	Q9DCT2 (pp) Q9Z1P6	false
5270	pp	Q9DCT2 (pp) Q9CR62	false
5271	pp	Q9DCT2 (pp) Q9CZU6	false
5272	pp	Q9DCT2 (pp) Q80Y14	false
5273	pp	Q9DCT2 (pp) Q9CQZ5	false
5274	pp	Q9DCT2 (pp) P70404	false
5275	pp	Q9DCT2 (pp) Q06185	false
5276	pp	Q9DCT2 (pp) Q99LX0	false
5277	pp	Q9DCT2 (pp) P97450	false
5278	pp	Q9CQ69 (pp) P56391	false
5279	pp	Q9CQ69 (pp) Q8K3J1	false
5280	pp	Q9CQ69 (pp) Q99LY9	false
5281	pp	Q9CQ69 (pp) Q9D6J6	false
5282	pp	Q9CQ69 (pp) Q9DCJ5	false
5283	pp	Q9CQ69 (pp) Q9CQH3	false
5284	pp	Q9CQ69 (pp) Q9DC69	false
5285	pp	Q9CQ69 (pp) Q9ERS2	false
5286	pp	Q9CQ69 (pp) Q9D3D9	false
5287	pp	Q9CQ69 (pp) P00405	false
5288	pp	Q9CQ69 (pp) Q91VR2	false
5289	pp	Q9CQ69 (pp) Q3UIU2	false
5290	pp	Q9CQ69 (pp) P17665	false
5291	pp	Q9CQ69 (pp) O09111	false
5292	pp	Q9CQ69 (pp) Q9CQQ7	false
5293	pp	Q9CQ69 (pp) Q99LX0	false
5294	pp	P08249 (pp) Q9D6R2	false
5295	pp	P08249 (pp) Q06185	false
5296	pp	P08249 (pp) Q91VR2	false
5297	pp	P08249 (pp) P70404	false
5298	pp	P08249 (pp) O35658	false
5299	pp	P08249 (pp) P17751	false
5300	pp	P08249 (pp) Q9DCD0	false
5301	pp	P08249 (pp) P56480	false
5302	pp	P08249 (pp) Q9D3D9	false
5303	pp	P08249 (pp) P97807	false
5304	pp	P08249 (pp) Q64521	false
5305	pp	P08249 (pp) Q60931	false
5306	pp	P08249 (pp) Q8BGH2	false
5307	pp	P08249 (pp) Q9D051	false
5308	pp	P08249 (pp) Q9D855	false
5309	pp	P08249 (pp) Q8K2B3	false
5310	pp	P08249 (pp) P05202	false
5311	pp	P08249 (pp) Q9DC70	false
5312	pp	P08249 (pp) Q8BH04	false
5313	pp	P08249 (pp) P63038	false
5314	pp	P08249 (pp) Q9D6J6	false
5315	pp	P08249 (pp) Q9CQC7	false
5316	pp	P08249 (pp) Q9CR68	false
5317	pp	P08249 (pp) Q9DB77	false
5318	pp	P08249 (pp) P09411	false
5319	pp	P08249 (pp) Q9DC69	false
5320	pp	P08249 (pp) Q8K3J1	false
5321	pp	P08249 (pp) Q8BMF3	false
5322	pp	P08249 (pp) Q8BMF4	false
5323	pp	P08249 (pp) Q9CQJ8	false
5324	pp	P08249 (pp) Q8VEM8	false
5325	pp	P08249 (pp) Q99KI0	false
5326	pp	P08249 (pp) O09111	false
5327	pp	P08249 (pp) Q99LX0	false
5328	pp	P08249 (pp) Q9DCX2	false
5329	pp	P08249 (pp) Q05920	false
5330	pp	P08249 (pp) Q91YT0	false
5331	pp	P08249 (pp) Q9Z2I9	false
5332	pp	P08249 (pp) P19783	false
5333	pp	P08249 (pp) Q91VD9	false
5334	pp	P08249 (pp) Q9DB20	false
5335	pp	P08249 (pp) P54071	false
5336	pp	P08249 (pp) P52480	false
5337	pp	P08249 (pp) Q9D2G2	false
5338	pp	P08249 (pp) Q9DCJ5	false
5339	pp	P08249 (pp) P97450	false
5340	pp	P08249 (pp) Q9WUM5	false
5341	pp	P08249 (pp) P26443	false
5342	pp	P08249 (pp) Q9CQZ5	false
5343	pp	P08249 (pp) Q9CZ13	false
5344	pp	P08249 (pp) Q9D0M3	false
5345	pp	P08249 (pp) P06745	false
5346	pp	P08249 (pp) P48962	false
5347	pp	P08249 (pp) Q03265	false
5348	pp	P08249 (pp) Q9CQH3	false
5349	pp	P08249 (pp) Q9CQQ7	false
5350	pp	P08249 (pp) Q9DCS9	false
5351	pp	Q9D6R2 (pp) P70404	false
5352	pp	Q9D6R2 (pp) P16054	false
5353	pp	Q9D6R2 (pp) Q8BWF0	false
5354	pp	Q9D6R2 (pp) Q91VR2	false
5355	pp	Q9D6R2 (pp) Q8K3J1	false
5356	pp	Q9D6R2 (pp) Q60597	false
5357	pp	Q9D6R2 (pp) P54071	false
5358	pp	Q9D6R2 (pp) Q9D2G2	false
5359	pp	Q9D6R2 (pp) Q9WUM5	false
5360	pp	P54071 (pp) P06151	false
5361	pp	P54071 (pp) Q60597	false
5362	pp	P54071 (pp) P70404	false
5363	pp	Q9DB20 (pp) Q9CQH3	false
5364	pp	Q9DB20 (pp) P67778	false
5365	pp	Q9DB20 (pp) Q9DCX2	false
5366	pp	Q9DB20 (pp) O09111	false
5367	pp	Q9DB20 (pp) Q9D6J5	false
5368	pp	Q9DB20 (pp) Q99LX0	false
5369	pp	Q9DB20 (pp) Q9DCJ5	false
5370	pp	Q9DB20 (pp) Q9CPP6	false
5371	pp	Q9DB20 (pp) P99029	false
5372	pp	Q9DB20 (pp) Q9CQ69	false
5373	pp	Q9DB20 (pp) Q9CR68	false
5374	pp	Q9DB20 (pp) P97807	false
5375	pp	Q9DB20 (pp) Q9CZ13	false
5376	pp	Q9DB20 (pp) Q9D6J6	false
5377	pp	Q9DB20 (pp) P19783	false
5378	pp	Q9DB20 (pp) P56391	false
5379	pp	Q9DB20 (pp) Q3UIU2	false
5380	pp	Q9DB20 (pp) Q9DC69	false
5381	pp	Q9DB20 (pp) Q9CQQ7	false
5382	pp	Q9DB20 (pp) P62073	false
5383	pp	Q9DB20 (pp) Q9ERS2	false
5384	pp	Q9DB20 (pp) Q9D3D9	false
5385	pp	Q9DB20 (pp) Q91YT0	false
5386	pp	Q9DB20 (pp) Q9WUM5	false
5387	pp	Q9DB20 (pp) P17751	false
5388	pp	Q9DB20 (pp) Q78IK2	false
5389	pp	Q9DB20 (pp) Q8K3J1	false
5390	pp	Q9DB20 (pp) Q06185	false
5391	pp	Q9DB20 (pp) Q91VM9	false
5392	pp	Q9DB20 (pp) Q9DCS9	false
5393	pp	Q9DB20 (pp) P43024	false
5394	pp	Q9DB20 (pp) P56480	false
5395	pp	Q9DB20 (pp) Q03265	false
5396	pp	Q9DB20 (pp) Q9Z1P6	false
5397	pp	Q9DB20 (pp) Q9CPQ8	false
5398	pp	Q9DB20 (pp) Q91VR2	false
5399	pp	Q9DB20 (pp) Q9DB77	false
5400	pp	Q9CQH3 (pp) Q9D6J6	false
5401	pp	Q3UHD9 (pp) Q9Z2H5	false
5402	pp	Q9Z2H5 (pp) Q99N28	false
5403	pp	Q6P9K8 (pp) O88952	false
5404	pp	Q6P9K8 (pp) O70589	false
5405	pp	O88952 (pp) P60469	false
5406	pp	O88952 (pp) O70589	false
5407	pp	P19783 (pp) Q9CQH3	false
5408	pp	P19783 (pp) Q9CQ69	false
5409	pp	P19783 (pp) Q9CR68	false
5410	pp	P19783 (pp) P19536	false
5411	pp	P19783 (pp) Q9D3D9	false
5412	pp	P19783 (pp) Q91YT0	false
5413	pp	P19783 (pp) Q06185	false
5414	pp	P19783 (pp) Q91VR2	false
5415	pp	P19783 (pp) Q9ERS2	false
5416	pp	P19783 (pp) P17665	false
5417	pp	P19783 (pp) Q9DCX2	false
5418	pp	P19783 (pp) Q99LX0	false
5419	pp	P19783 (pp) Q9CQQ7	false
5420	pp	P19783 (pp) P56391	false
5421	pp	P19783 (pp) P43024	false
5422	pp	P19783 (pp) P00405	false
5423	pp	P19783 (pp) Q9DCJ5	false
5424	pp	P19783 (pp) P48771	false
5425	pp	P19783 (pp) Q9DC69	false
5426	pp	Q8BK64 (pp) P63038	false
5427	pp	Q8BK64 (pp) Q60864	false
5428	pp	Q8BK64 (pp) P07901	false
5429	pp	Q8BK64 (pp) Q61699	false
5430	pp	Q8BK64 (pp) P11499	false
5431	pp	P63038 (pp) P52196	false
5432	pp	P63038 (pp) P09411	false
5433	pp	P63038 (pp) Q99LC5	false
5434	pp	P63038 (pp) P52480	false
5435	pp	P63038 (pp) P15105	false
5436	pp	P63038 (pp) Q9WUM5	false
5437	pp	P63038 (pp) Q9Z0X1	false
5438	pp	P63038 (pp) Q6PB66	false
5439	pp	P63038 (pp) Q8BIJ6	false
5440	pp	P63038 (pp) P63037	false
5441	pp	P63038 (pp) Q925I1	false
5442	pp	P63038 (pp) Q8CGK3	false
5443	pp	P63038 (pp) Q921G7	false
5444	pp	P63038 (pp) Q91VR2	false
5445	pp	P63038 (pp) Q61699	false
5446	pp	P63038 (pp) P17156	false
5447	pp	P63038 (pp) O35658	false
5448	pp	P63038 (pp) P67778	false
5449	pp	P63038 (pp) P97807	false
5450	pp	Q8BH95 (pp) Q9CZ13	false
5451	pp	Q8BH95 (pp) Q8BWT1	false
5452	pp	Q8BH95 (pp) Q8QZT1	false
5453	pp	Q8BH95 (pp) P51174	false
5454	pp	Q8BH95 (pp) P50544	false
5455	pp	Q8BH95 (pp) Q9JHI5	false
5456	pp	Q8BH95 (pp) Q8BMS1	false
5457	pp	Q8BH95 (pp) Q99MN9	false
5458	pp	Q8BH95 (pp) O08756	false
5459	pp	Q8BH95 (pp) Q61425	false
5460	pp	Q8BH95 (pp) Q99JY0	false
5461	pp	Q8BH95 (pp) Q99MR8	false
5462	pp	Q8BH95 (pp) Q9DCJ5	false
5463	pp	Q8BH95 (pp) Q9WUM5	false
5464	pp	Q8BH95 (pp) Q9CQ62	false
5465	pp	Q8BH95 (pp) Q99LC5	false
5466	pp	Q8BH95 (pp) Q9DC69	false
5467	pp	Q8BH95 (pp) Q9DBL1	false
5468	pp	Q9CZ13 (pp) Q9ERS2	false
5469	pp	Q9CZ13 (pp) Q9DCS9	false
5470	pp	Q9CZ13 (pp) P97807	false
5471	pp	Q9CZ13 (pp) P67778	false
5472	pp	Q9CZ13 (pp) Q91VD9	false
5473	pp	Q9CZ13 (pp) Q9D3D9	false
5474	pp	Q9CZ13 (pp) Q91YT0	false
5475	pp	Q9CZ13 (pp) O09111	false
5476	pp	Q9CZ13 (pp) Q8K1Z0	false
5477	pp	Q9CZ13 (pp) Q60597	false
5478	pp	Q9CZ13 (pp) Q9CQ69	false
5479	pp	Q9CZ13 (pp) Q9DCJ5	false
5480	pp	Q9CZ13 (pp) Q9Z1P6	false
5481	pp	Q9CZ13 (pp) Q9WUM5	false
5482	pp	Q9CZ13 (pp) P19783	false
5483	pp	Q9CZ13 (pp) Q9D6J6	false
5484	pp	Q9CZ13 (pp) Q91VR2	false
5485	pp	Q9CZ13 (pp) Q8K3J1	false
5486	pp	Q9CZ13 (pp) Q9CQH3	false
5487	pp	Q9CZ13 (pp) Q99P72	false
5488	pp	Q9CZ13 (pp) Q9DC69	false
5489	pp	Q9CZ13 (pp) Q9DB77	false
5490	pp	Q9CZ13 (pp) Q9CR68	false
5491	pp	Q9CZ13 (pp) Q99LY9	false
5492	pp	Q9D0M3 (pp) Q9DB20	false
5493	pp	Q9D0M3 (pp) P62897	false
5494	pp	Q9D0M3 (pp) P70404	false
5495	pp	Q9D0M3 (pp) O09111	false
5496	pp	Q9D0M3 (pp) P97807	false
5497	pp	Q9D0M3 (pp) Q9D3D9	false
5498	pp	Q9D0M3 (pp) Q9ERS2	false
5499	pp	Q9D0M3 (pp) Q9CQZ6	false
5500	pp	Q9D0M3 (pp) Q9CQ69	false
5501	pp	Q9D0M3 (pp) P97450	false
5502	pp	Q9D0M3 (pp) Q06185	false
5503	pp	Q9D0M3 (pp) Q9WUM5	false
5504	pp	Q9D0M3 (pp) Q91VD9	false
5505	pp	Q9D0M3 (pp) P17751	false
5506	pp	Q9D0M3 (pp) Q9DB77	false
5507	pp	Q9D0M3 (pp) P19536	false
5508	pp	Q9D0M3 (pp) Q91VR2	false
5509	pp	Q9D0M3 (pp) P50516	false
5510	pp	Q9D0M3 (pp) Q9DCX2	false
5511	pp	Q9D0M3 (pp) Q9CR68	false
5512	pp	Q9D0M3 (pp) Q91YT0	false
5513	pp	Q9D0M3 (pp) Q9D6J6	false
5514	pp	Q9D0M3 (pp) P62073	false
5515	pp	Q9D0M3 (pp) Q8K3J1	false
5516	pp	Q9D0M3 (pp) Q64521	false
5517	pp	Q9D0M3 (pp) P56391	false
5518	pp	Q9D0M3 (pp) Q8VEM8	false
5519	pp	Q9D0M3 (pp) P42125	false
5520	pp	Q9D0M3 (pp) Q99LC3	false
5521	pp	Q9D0M3 (pp) Q99LX0	false
5522	pp	Q9D0M3 (pp) P43024	false
5523	pp	Q9D0M3 (pp) Q9DC69	false
5524	pp	Q9D0M3 (pp) Q9CQQ7	false
5525	pp	Q9D0M3 (pp) Q9D2G2	false
5526	pp	Q9D0M3 (pp) Q9DCJ5	false
5527	pp	Q9D0M3 (pp) P48771	false
5528	pp	Q9D0M3 (pp) Q9CZ13	false
5529	pp	Q9D0M3 (pp) Q9CQH3	false
5530	pp	Q9D0M3 (pp) Q9Z1P6	false
5531	pp	Q9D0M3 (pp) P00405	false
5532	pp	Q9D0M3 (pp) P19783	false
5533	pp	Q9D0M3 (pp) Q9CPP6	false
5534	pp	Q9D0M3 (pp) Q03265	false
5535	pp	Q9D0M3 (pp) O35658	false
5536	pp	Q9D0M3 (pp) P56480	false
5537	pp	Q99LC3 (pp) Q99LY9	false
5538	pp	Q99LC3 (pp) Q9Z1P6	false
5539	pp	Q99LC3 (pp) Q9DCJ5	false
5540	pp	Q99LC3 (pp) P50516	false
5541	pp	Q99LC3 (pp) O09111	false
5542	pp	Q99LC3 (pp) Q9D6J6	false
5543	pp	Q99LC3 (pp) Q9CQH3	false
5544	pp	Q99LC3 (pp) Q9DB77	false
5545	pp	Q99LC3 (pp) Q91YT0	false
5546	pp	Q99LC3 (pp) Q9CQ54	false
5547	pp	Q99LC3 (pp) Q9DCS9	false
5548	pp	Q99LC3 (pp) Q9CQ69	false
5549	pp	Q99LC3 (pp) Q9DC69	false
5550	pp	Q99LC3 (pp) Q9D3D9	false
5551	pp	Q99LC3 (pp) Q8K3J1	false
5552	pp	Q99LY9 (pp) Q9ERS2	false
5553	pp	Q99LY9 (pp) Q9CQH3	false
5554	pp	Q99LY9 (pp) Q9D6J6	false
5555	pp	Q8BMF4 (pp) Q05920	false
5556	pp	Q8BMF4 (pp) Q8BWT1	false
5557	pp	Q8BMF4 (pp) Q9D2G2	false
5558	pp	Q8BMF4 (pp) P63101	false
5559	pp	Q8BMF4 (pp) Q9WUM5	false
5560	pp	Q8BMF4 (pp) Q99JY0	false
5561	pp	Q8BMF4 (pp) Q922H2	false
5562	pp	Q05920 (pp) P06151	false
5563	pp	Q05920 (pp) P15105	false
5564	pp	P63085 (pp) P35438	false
5565	pp	P63085 (pp) Q64010	false
5566	pp	P63085 (pp) P07901	false
5567	pp	P61027 (pp) Q61598	false
5568	pp	Q61598 (pp) Q91VR2	false
5569	pp	Q61598 (pp) P63011	false
5570	pp	Q61598 (pp) Q99PT1	false
5571	pp	Q61598 (pp) P62821	false
5572	pp	P56480 (pp) P17742	false
5573	pp	P56480 (pp) Q9D2G2	false
5574	pp	P56480 (pp) P63038	false
5575	pp	P56480 (pp) P50516	false
5576	pp	P56480 (pp) P09103	false
5577	pp	P56480 (pp) Q9D3D9	false
5578	pp	P56480 (pp) Q60864	false
5579	pp	P56480 (pp) P03930	false
5580	pp	P56480 (pp) Q06185	false
5581	pp	P56480 (pp) Q99LX0	false
5582	pp	P56480 (pp) Q9WUM5	false
5583	pp	P56480 (pp) P17156	false
5584	pp	P56480 (pp) Q9CZ13	false
5585	pp	P56480 (pp) P19783	false
5586	pp	P56480 (pp) P62259	false
5587	pp	P56480 (pp) P00405	false
5588	pp	P56480 (pp) P56391	false
5589	pp	P56480 (pp) P15105	false
5590	pp	P56480 (pp) O35143	false
5591	pp	P56480 (pp) Q99LC3	false
5592	pp	P56480 (pp) Q8K3J1	false
5593	pp	P56480 (pp) P17182	false
5594	pp	P56480 (pp) Q9DCX2	false
5595	pp	P56480 (pp) Q8VEM8	false
5596	pp	P56480 (pp) Q91VR2	false
5597	pp	P56480 (pp) P16054	false
5598	pp	P56480 (pp) Q91VD9	false
5599	pp	P56480 (pp) Q9D6J6	false
5600	pp	P56480 (pp) Q9CQQ7	false
5601	pp	P56480 (pp) Q91YT0	false
5602	pp	P56480 (pp) Q9CR68	false
5603	pp	P56480 (pp) P97807	false
5604	pp	P56480 (pp) Q03265	false
5605	pp	P68404 (pp) P35438	false
5606	pp	P68404 (pp) P26645	false
5607	pp	P67778 (pp) P50516	false
5608	pp	Q9JLJ2 (pp) Q91VR2	false
5609	pp	Q9JLJ2 (pp) Q9EQ20	false
5610	pp	Q9JLJ2 (pp) Q61425	false
5611	pp	Q9JLJ2 (pp) Q8CHT0	false
5612	pp	Q9JLJ2 (pp) Q8BW75	false
5613	pp	Q9JLJ2 (pp) P61922	false
5614	pp	Q91VR2 (pp) O09111	false
5615	pp	Q91VR2 (pp) Q9CQH3	false
5616	pp	Q91VR2 (pp) Q9D6J6	false
5617	pp	Q9CPQ8 (pp) Q9CQH3	false
5618	pp	Q9CPQ8 (pp) Q9D6J6	false
5619	pp	Q91VD9 (pp) Q9ERS2	false
5620	pp	Q91VD9 (pp) Q9DC69	false
5621	pp	Q91VD9 (pp) Q91YT0	false
5622	pp	Q91VD9 (pp) Q99LY9	false
5623	pp	Q91VD9 (pp) Q3UIU2	false
5624	pp	Q91VD9 (pp) Q99LC5	false
5625	pp	Q91VD9 (pp) Q8K3J1	false
5626	pp	Q91VD9 (pp) Q9Z1P6	false
5627	pp	Q91VD9 (pp) Q8BMF4	false
5628	pp	Q91VD9 (pp) Q9DCJ5	false
5629	pp	Q91VD9 (pp) Q9CQ54	false
5630	pp	Q91VD9 (pp) Q9CQQ7	false
5631	pp	Q91VD9 (pp) P97807	false
5632	pp	Q91VD9 (pp) Q9DB77	false
5633	pp	Q91VD9 (pp) Q99LC3	false
5634	pp	Q91VD9 (pp) Q6PB66	false
5635	pp	Q91VD9 (pp) Q9DCS9	false
5636	pp	Q91VD9 (pp) Q9WUM5	false
5637	pp	Q91VD9 (pp) Q9CR68	false
5638	pp	Q91VD9 (pp) Q9CQH3	false
5639	pp	Q91VD9 (pp) Q91VR2	false
5640	pp	Q91VD9 (pp) Q9CQ69	false
5641	pp	Q91VD9 (pp) O09111	false
5642	pp	Q91VD9 (pp) Q9D2G2	false
5643	pp	Q91VD9 (pp) Q9CQZ6	false
5644	pp	Q91VD9 (pp) Q9D6J6	false
5645	pp	Q9DCS9 (pp) Q9CR68	false
5646	pp	Q9DCS9 (pp) Q9DC69	false
5647	pp	Q9DCS9 (pp) Q9CQQ7	false
5648	pp	Q9DCS9 (pp) Q06185	false
5649	pp	Q9DCS9 (pp) Q9CPQ8	false
5650	pp	Q9DCS9 (pp) Q9D3D9	false
5651	pp	Q9DCS9 (pp) Q9DCX2	false
5652	pp	Q9DCS9 (pp) Q9D6J6	false
5653	pp	Q9DCS9 (pp) Q9ERS2	false
5654	pp	Q9DCS9 (pp) Q9CQ69	false
5655	pp	Q9DCS9 (pp) Q8K3J1	false
5656	pp	Q9DCS9 (pp) Q9DCJ5	false
5657	pp	Q9DCS9 (pp) Q9CQH3	false
5658	pp	Q9DCS9 (pp) O09111	false
5659	pp	Q9CR68 (pp) P43024	false
5660	pp	Q9CR68 (pp) Q9D2G2	false
5661	pp	Q9CR68 (pp) Q06185	false
5662	pp	Q9CR68 (pp) Q9CQQ7	false
5663	pp	Q9CR68 (pp) Q8K3J1	false
5664	pp	Q9CR68 (pp) Q9DCJ5	false
5665	pp	Q9CR68 (pp) Q9WUM5	false
5666	pp	Q9CR68 (pp) Q9ERS2	false
5667	pp	Q9CR68 (pp) Q9D3D9	false
5668	pp	Q9CR68 (pp) P00405	false
5669	pp	Q9CR68 (pp) P56391	false
5670	pp	Q9CR68 (pp) Q9CQ69	false
5671	pp	Q9CR68 (pp) O88441	false
5672	pp	Q9CR68 (pp) P62897	false
5673	pp	Q9CR68 (pp) Q9D6J6	false
5674	pp	Q9CR68 (pp) Q9DC69	false
5675	pp	Q9CR68 (pp) O09111	false
5676	pp	Q9CR68 (pp) Q9DCX2	false
5677	pp	Q9CR68 (pp) Q8VEM8	false
5678	pp	Q9CR68 (pp) Q91VR2	false
5679	pp	Q9CR68 (pp) Q9CQH3	false
5680	pp	Q9CR68 (pp) O35658	false
5681	pp	P05132 (pp) P12367	false
5682	pp	P05132 (pp) P31324	false
5683	pp	P05132 (pp) P35438	false
5684	pp	Q9CQJ8 (pp) Q06185	false
5685	pp	Q9CQJ8 (pp) P19783	false
5686	pp	Q9CQJ8 (pp) Q9DB77	false
5687	pp	Q9CQJ8 (pp) Q9Z1P6	false
5688	pp	Q9CQJ8 (pp) Q9DC69	false
5689	pp	Q9CQJ8 (pp) O09111	false
5690	pp	Q9CQJ8 (pp) Q9DB20	false
5691	pp	Q9CQJ8 (pp) Q9CQ69	false
5692	pp	Q9CQJ8 (pp) Q9DCJ5	false
5693	pp	Q9CQJ8 (pp) P48771	false
5694	pp	Q9CQJ8 (pp) Q9D0M3	false
5695	pp	Q9CQJ8 (pp) Q9D6J6	false
5696	pp	Q9CQJ8 (pp) Q9CQ54	false
5697	pp	Q9CQJ8 (pp) P97450	false
5698	pp	Q9CQJ8 (pp) Q9CZ13	false
5699	pp	Q9CQJ8 (pp) P97807	false
5700	pp	Q9CQJ8 (pp) Q9D023	false
5701	pp	Q9CQJ8 (pp) Q9CQZ6	false
5702	pp	Q9CQJ8 (pp) Q9ERS2	false
5703	pp	Q9CQJ8 (pp) Q99KI0	false
5704	pp	Q9CQJ8 (pp) Q91YT0	false
5705	pp	Q9CQJ8 (pp) Q99LC3	false
5706	pp	Q9CQJ8 (pp) Q9CPP6	false
5707	pp	Q9CQJ8 (pp) Q9CPQ8	false
5708	pp	Q9CQJ8 (pp) P43024	false
5709	pp	Q9CQJ8 (pp) Q9CQC7	false
5710	pp	Q9CQJ8 (pp) Q8K1Z0	false
5711	pp	Q9CQJ8 (pp) Q9CQZ5	false
5712	pp	Q9CQJ8 (pp) Q99LC5	false
5713	pp	Q9CQJ8 (pp) Q8VEM8	false
5714	pp	Q9CQJ8 (pp) Q03265	false
5715	pp	Q9CQJ8 (pp) Q62425	false
5716	pp	Q9CQJ8 (pp) Q9CR68	false
5717	pp	Q9CQJ8 (pp) Q9CQH3	false
5718	pp	Q9CQJ8 (pp) Q99LY9	false
5719	pp	Q9CQJ8 (pp) Q8K3J1	false
5720	pp	Q9CQJ8 (pp) Q9DCX2	false
5721	pp	Q9CQJ8 (pp) Q91VR2	false
5722	pp	Q9CQJ8 (pp) Q9D6J5	false
5723	pp	Q9CQJ8 (pp) Q91VD9	false
5724	pp	Q9CQJ8 (pp) Q9D3D9	false
5725	pp	Q9CQJ8 (pp) P99029	false
5726	pp	Q9CQJ8 (pp) P62073	false
5727	pp	Q9CQJ8 (pp) Q9DCS9	false
5728	pp	Q9CQJ8 (pp) Q9CQQ7	false
5729	pp	Q06185 (pp) Q99LY9	false
5730	pp	Q06185 (pp) Q9D6J6	false
5731	pp	Q06185 (pp) Q9CQH3	false
5732	pp	Q06185 (pp) P56391	false
5733	pp	Q06185 (pp) Q9DCJ5	false
5734	pp	Q06185 (pp) Q9CQ69	false
5735	pp	Q06185 (pp) O09111	false
5736	pp	Q06185 (pp) Q8K3J1	false
5737	pp	Q06185 (pp) Q91VR2	false
5738	pp	Q06185 (pp) Q9D3D9	false
5739	pp	Q06185 (pp) Q9ERS2	false
5740	pp	Q06185 (pp) Q9CQQ7	false
5741	pp	Q06185 (pp) Q9DCX2	false
5742	pp	Q06185 (pp) P03930	false
5743	pp	Q9DC70 (pp) Q9D0S9	false
5744	pp	Q9DC70 (pp) Q03265	false
5745	pp	Q9DC70 (pp) Q9CQZ5	false
5746	pp	Q9DC70 (pp) Q8K2B3	false
5747	pp	Q9DC70 (pp) P62073	false
5748	pp	Q9DC70 (pp) Q9Z1P6	false
5749	pp	Q9DC70 (pp) P42125	false
5750	pp	Q9DC70 (pp) Q9CQH3	false
5751	pp	Q9DC70 (pp) P56391	false
5752	pp	Q9DC70 (pp) P52503	false
5753	pp	Q9DC70 (pp) P97450	false
5754	pp	Q9DC70 (pp) Q99LC3	false
5755	pp	Q9DC70 (pp) Q99KI0	false
5756	pp	Q9DC70 (pp) P17751	false
5757	pp	Q9DC70 (pp) Q9D0M3	false
5758	pp	Q9DC70 (pp) Q9DCJ5	false
5759	pp	Q9DC70 (pp) Q9DCX2	false
5760	pp	Q9DC70 (pp) Q9D855	false
5761	pp	Q9DC70 (pp) Q9DB20	false
5762	pp	Q9DC70 (pp) Q3UIU2	false
5763	pp	Q9DC70 (pp) Q9CR68	false
5764	pp	Q9DC70 (pp) Q91YT0	false
5765	pp	Q9DC70 (pp) Q9CPP6	false
5766	pp	Q9DC70 (pp) P56480	false
5767	pp	Q9DC70 (pp) P70404	false
5768	pp	Q9DC70 (pp) Q9ERS2	false
5769	pp	Q9DC70 (pp) Q9CQJ8	false
5770	pp	Q9DC70 (pp) Q8K3J1	false
5771	pp	Q9DC70 (pp) Q9CQ69	false
5772	pp	Q9DC70 (pp) O09111	false
5773	pp	Q9DC70 (pp) O08756	false
5774	pp	Q9DC70 (pp) Q9D3D9	false
5775	pp	Q9DC70 (pp) Q9DCS9	false
5776	pp	Q9DC70 (pp) Q91VR2	false
5777	pp	Q9DC70 (pp) Q91Z53	false
5778	pp	Q9DC70 (pp) P19783	false
5779	pp	Q9DC70 (pp) Q91VD9	false
5780	pp	Q9DC70 (pp) Q91VT4	false
5781	pp	Q9DC70 (pp) Q9CZ13	false
5782	pp	Q9DC70 (pp) Q9D6J6	false
5783	pp	Q9DC70 (pp) Q06185	false
5784	pp	Q9DC70 (pp) Q9CXZ1	false
5785	pp	Q9DC70 (pp) Q9DC69	false
5786	pp	Q9D0S9 (pp) Q91Z53	false
5787	pp	Q9D0S9 (pp) O08756	false
5788	pp	Q9D1K2 (pp) Q9Z1G4	false
5789	pp	Q9D1K2 (pp) P62814	false
5790	pp	Q9D1K2 (pp) P63082	false
5791	pp	Q9D1K2 (pp) Q8K3J1	false
5792	pp	Q9D1K2 (pp) Q9Z1G3	false
5793	pp	Q9D1K2 (pp) Q9WTT4	false
5794	pp	Q9D1K2 (pp) Q9CQZ5	false
5795	pp	Q9D1K2 (pp) P51863	false
5796	pp	Q9D1K2 (pp) Q9CQ75	false
5797	pp	Q9D1K2 (pp) P50516	false
5798	pp	Q9D1K2 (pp) Q91VM9	false
5799	pp	Q9D1K2 (pp) Q9Z1P6	false
5800	pp	Q9D1K2 (pp) Q8BVE3	false
5801	pp	Q9D1K2 (pp) P57746	false
5802	pp	Q9D1K2 (pp) P50518	false
5803	pp	Q9Z1G4 (pp) P50516	false
5804	pp	Q9Z1G4 (pp) Q9WTT4	false
5805	pp	Q9Z1G4 (pp) P63082	false
5806	pp	Q9Z1G4 (pp) Q62277	false
5807	pp	Q9WUM5 (pp) Q9D0K2	false
5808	pp	Q9WUM5 (pp) Q9DC69	false
5809	pp	Q9WUM5 (pp) Q9CQQ7	false
5810	pp	Q9WUM5 (pp) Q9DCJ5	false
5811	pp	Q9WUM5 (pp) P06151	false
5812	pp	Q9WUM5 (pp) Q9D6J6	false
5813	pp	Q9WUM5 (pp) Q91VR2	false
5814	pp	Q9WUM5 (pp) Q99JY0	false
5815	pp	Q9WUM5 (pp) Q60597	false
5816	pp	Q9WUM5 (pp) Q99LX0	false
5817	pp	Q9WUM5 (pp) Q9ERS2	false
5818	pp	Q9WUM5 (pp) Q9CQH3	false
5819	pp	Q9WUM5 (pp) Q60931	false
5820	pp	Q9WUM5 (pp) Q8VEM8	false
5821	pp	Q9CQN1 (pp) P63037	false
5822	pp	Q9CQN1 (pp) Q8K3J1	false
5823	pp	Q9CQN1 (pp) Q91YT0	false
5824	pp	Q9CQN1 (pp) P63038	false
5825	pp	P63037 (pp) Q91VR2	false
5826	pp	P63037 (pp) Q61699	false
5827	pp	Q9DCW4 (pp) Q9CPP6	false
5828	pp	Q9DCW4 (pp) Q9DCJ5	false
5829	pp	Q9DCW4 (pp) P56391	false
5830	pp	Q9DCW4 (pp) P51174	false
5831	pp	Q9DCW4 (pp) Q9DB20	false
5832	pp	Q9DCW4 (pp) Q9D3D9	false
5833	pp	Q9DCW4 (pp) Q8JZN5	false
5834	pp	Q9DCW4 (pp) Q9CQA3	false
5835	pp	Q9DCW4 (pp) Q9Z2I9	false
5836	pp	Q9DCW4 (pp) Q06185	false
5837	pp	Q9DCW4 (pp) O09111	false
5838	pp	Q9DCW4 (pp) Q9D6J5	false
5839	pp	Q9DCW4 (pp) Q91YT0	false
5840	pp	Q9DCW4 (pp) Q9ERS2	false
5841	pp	Q9DCW4 (pp) Q8BMS1	false
5842	pp	Q9DCW4 (pp) Q8K3J1	false
5843	pp	Q9DCW4 (pp) P08249	false
5844	pp	Q9DCW4 (pp) P17751	false
5845	pp	Q9DCW4 (pp) Q91Z53	false
5846	pp	Q9DCW4 (pp) Q9WUM5	false
5847	pp	Q9DCW4 (pp) P42125	false
5848	pp	Q9DCW4 (pp) Q9DBL1	false
5849	pp	Q9DCW4 (pp) Q921G7	false
5850	pp	Q9DCW4 (pp) Q99LC3	false
5851	pp	Q9DCW4 (pp) Q80U28	false
5852	pp	Q9DCW4 (pp) P19783	false
5853	pp	Q9DCW4 (pp) Q9DC69	false
5854	pp	Q9DCW4 (pp) Q99LC5	false
5855	pp	Q9DCW4 (pp) P52503	false
5856	pp	Q9DCW4 (pp) Q9CQJ8	false
5857	pp	Q9DCW4 (pp) Q8BH95	false
5858	pp	Q9DCW4 (pp) Q9DCT2	false
5859	pp	Q9DCW4 (pp) Q9JHI5	false
5860	pp	Q9DCW4 (pp) O08756	false
5861	pp	Q9DCW4 (pp) Q8BWT1	false
5862	pp	Q9DCW4 (pp) Q9DCS9	false
5863	pp	Q9DCW4 (pp) Q61425	false
5864	pp	Q9DCW4 (pp) Q9Z1P6	false
5865	pp	Q9DCW4 (pp) Q9D6J6	false
5866	pp	Q9DCW4 (pp) Q9D0S9	false
5867	pp	Q9DCW4 (pp) Q8QZT1	false
5868	pp	Q9DCW4 (pp) Q9DC70	false
5869	pp	Q9DCW4 (pp) Q8R4N0	false
5870	pp	Q9DCW4 (pp) P50544	false
5871	pp	Q9CPP6 (pp) Q9D6J6	false
5872	pp	Q9CPP6 (pp) Q9DB77	false
5873	pp	Q9CPP6 (pp) Q9DCX2	false
5874	pp	Q9CPP6 (pp) P48771	false
5875	pp	Q9CPP6 (pp) Q9DCJ5	false
5876	pp	Q9CPP6 (pp) Q99LY9	false
5877	pp	Q9CPP6 (pp) Q9ERS2	false
5878	pp	Q9CPP6 (pp) Q9CQZ6	false
5879	pp	Q9CPP6 (pp) Q91VD9	false
5880	pp	Q9CPP6 (pp) Q8K3J1	false
5881	pp	Q9CPP6 (pp) Q9CQ69	false
5882	pp	Q9CPP6 (pp) Q99LC5	false
5883	pp	Q9CPP6 (pp) Q9D6J5	false
5884	pp	Q9CPP6 (pp) Q9CQH3	false
5885	pp	Q9CPP6 (pp) Q9WUM5	false
5886	pp	Q9CPP6 (pp) Q9Z1P6	false
5887	pp	Q9CPP6 (pp) P56391	false
5888	pp	Q9CPP6 (pp) P43024	false
5889	pp	Q9CPP6 (pp) Q91YT0	false
5890	pp	P46460 (pp) Q01097	false
5891	pp	P46460 (pp) Q9CWZ7	false
5892	pp	P46460 (pp) Q62442	false
5893	pp	P46460 (pp) O08599	false
5894	pp	P46460 (pp) O35526	false
5895	pp	P46460 (pp) P35438	false
5896	pp	P46460 (pp) P23819	false
5897	pp	P46460 (pp) P63101	false
5898	pp	Q08331 (pp) Q9CQ62	false
5899	pp	Q08331 (pp) Q01097	false
5900	pp	Q9CQ62 (pp) Q99JY0	false
5901	pp	Q9CQ62 (pp) Q8BWT1	false
5902	pp	Q9CQ62 (pp) Q99LC5	false
5903	pp	Q9CQ62 (pp) P19096	false
5904	pp	Q9CQ62 (pp) P41216	false
5905	pp	Q9D2G2 (pp) Q91VR2	false
5906	pp	Q9D2G2 (pp) Q9WUM5	false
5907	pp	Q9D2G2 (pp) Q60597	false
5908	pp	Q9D2G2 (pp) Q9D3D9	false
5909	pp	Q3UIU2 (pp) Q9D6J6	false
5910	pp	Q3UIU2 (pp) Q9CQH3	false
5911	pp	P31938 (pp) P63085	false
5912	pp	P31938 (pp) P35438	false
5913	pp	P31938 (pp) P16054	false
5914	pp	P17427 (pp) P17426	false
5915	pp	P17427 (pp) Q68FD5	false
5916	pp	P17427 (pp) O08585	false
5917	pp	P17427 (pp) Q80VP1	false
5918	pp	P17427 (pp) P62743	false
5919	pp	P17427 (pp) P39053	false
5920	pp	P17427 (pp) Q8CHC4	false
5921	pp	P17427 (pp) Q6IRU5	false
5922	pp	P17427 (pp) P84091	false
5923	pp	P17427 (pp) Q9DBG3	false
5924	pp	P17426 (pp) P62743	false
5925	pp	P17426 (pp) O08585	false
5926	pp	P17426 (pp) Q80VP1	false
5927	pp	P17426 (pp) Q8CHC4	false
5928	pp	P57746 (pp) P50516	false
5929	pp	P57746 (pp) Q8BVE3	false
5930	pp	P57746 (pp) Q9Z1G4	false
5931	pp	P57746 (pp) Q9CQZ6	false
5932	pp	P57746 (pp) P97450	false
5933	pp	P57746 (pp) Q9Z1G3	false
5934	pp	P57746 (pp) Q9WTT4	false
5935	pp	P57746 (pp) P23506	false
5936	pp	P57746 (pp) P63082	false
5937	pp	P57746 (pp) Q9CQH3	false
5938	pp	P50516 (pp) Q9JHU4	false
5939	pp	P50516 (pp) Q9R0K7	false
5940	pp	P50516 (pp) Q8BPN8	false
5941	pp	P50516 (pp) P60710	false
5942	pp	P50516 (pp) Q7TPR4	false
5943	pp	P50516 (pp) P39053	false
5944	pp	P50516 (pp) Q7TQF7	false
5945	pp	P50516 (pp) P53395	false
5946	pp	P50516 (pp) P55088	false
5947	pp	P50516 (pp) Q9D6J6	false
5948	pp	P50516 (pp) P46460	false
5949	pp	P50516 (pp) P46660	false
5950	pp	P50516 (pp) Q9QYR6	false
5951	pp	P50516 (pp) P01831	false
5952	pp	P50516 (pp) P28660	false
5953	pp	P50516 (pp) Q9D6R2	false
5954	pp	P50516 (pp) P47754	false
5955	pp	P50516 (pp) Q5SQX6	false
5956	pp	P50516 (pp) Q5DQR4	false
5957	pp	P50516 (pp) O35643	false
5958	pp	P50516 (pp) Q9Z2I0	false
5959	pp	P50516 (pp) Q62425	false
5960	pp	P50516 (pp) P63082	false
5961	pp	P50516 (pp) O08539	false
5962	pp	P50516 (pp) Q9JLM8	false
5963	pp	P50516 (pp) Q8VD37	false
5964	pp	P50516 (pp) P17427	false
5965	pp	P50516 (pp) Q99LX0	false
5966	pp	P50516 (pp) Q80XN0	false
5967	pp	P50516 (pp) O54983	false
5968	pp	P50516 (pp) P17426	false
5969	pp	P50516 (pp) Q9Z0E0	false
5970	pp	P50516 (pp) Q9Z1J3	false
5971	pp	P50516 (pp) Q3UHL1	false
5972	pp	P50516 (pp) Q91VR2	false
5973	pp	P50516 (pp) P12382	false
5974	pp	P50516 (pp) P08553	false
5975	pp	P70404 (pp) Q91VR2	false
5976	pp	P70404 (pp) Q9WUM5	false
5977	pp	P70404 (pp) Q9DC69	false
5978	pp	P70404 (pp) Q60597	false
5979	pp	P70404 (pp) Q9D2G2	false
5980	pp	O88441 (pp) Q9D6J6	false
5981	pp	O88441 (pp) Q9CQH3	false
5982	pp	O88441 (pp) Q6PB66	false
5983	pp	Q7TQI3 (pp) P68510	false
5984	pp	P17751 (pp) P06745	false
5985	pp	P17751 (pp) P05063	false
5986	pp	P17751 (pp) P17182	false
5987	pp	P17751 (pp) Q99LX0	false
5988	pp	P17751 (pp) P09411	false
5989	pp	P17751 (pp) Q93092	false
5990	pp	P17751 (pp) Q9CZ13	false
5991	pp	P17751 (pp) Q9D6J6	false
5992	pp	P17751 (pp) P56480	false
5993	pp	P17751 (pp) Q91VD9	false
5994	pp	P17751 (pp) P70296	false
5995	pp	P17751 (pp) Q9D2G2	false
5996	pp	P17751 (pp) Q64521	false
5997	pp	P17751 (pp) P47857	false
5998	pp	P17751 (pp) P16858	false
5999	pp	P17751 (pp) Q9WUM5	false
6000	pp	P17751 (pp) P23506	false
6001	pp	P17751 (pp) P99029	false
6002	pp	P17751 (pp) Q8K3J1	false
6003	pp	P17751 (pp) P97807	false
6004	pp	P17751 (pp) Q03265	false
6005	pp	P17751 (pp) P05064	false
6006	pp	P17751 (pp) Q9CR68	false
6007	pp	P17751 (pp) Q9WUA3	false
6008	pp	P17751 (pp) Q91VR2	false
6009	pp	P17751 (pp) P63101	false
6010	pp	P17751 (pp) P52480	false
6011	pp	P17751 (pp) P06151	false
6012	pp	P17751 (pp) Q9R0P5	false
6013	pp	P17751 (pp) Q91YT0	false
6014	pp	P09411 (pp) Q9DCD0	false
6015	pp	P09411 (pp) P17182	false
6016	pp	P09411 (pp) P17742	false
6017	pp	P09411 (pp) P16858	false
6018	pp	P09411 (pp) P06151	false
6019	pp	Q9Z1P6 (pp) Q9D6J6	false
6020	pp	Q9Z1P6 (pp) Q9ERS2	false
6021	pp	Q9Z1P6 (pp) P56391	false
6022	pp	Q9Z1P6 (pp) Q3UIU2	false
6023	pp	Q9Z1P6 (pp) Q9D3D9	false
6024	pp	Q9Z1P6 (pp) Q9DC69	false
6025	pp	Q9Z1P6 (pp) Q9CPQ8	false
6026	pp	Q9Z1P6 (pp) Q99LX0	false
6027	pp	Q9Z1P6 (pp) Q9CQ69	false
6028	pp	Q9Z1P6 (pp) Q9CQH3	false
6029	pp	Q9Z1P6 (pp) Q9DCJ5	false
6030	pp	Q9Z1P6 (pp) Q8K3J1	false
6031	pp	Q9Z1P6 (pp) Q06185	false
6032	pp	Q9Z1P6 (pp) O08756	false
6033	pp	Q9Z1P6 (pp) Q9DCS9	false
6034	pp	Q9Z1P6 (pp) Q91YT0	false
6035	pp	Q9Z1P6 (pp) Q9DCX2	false
6036	pp	Q9Z1P6 (pp) O09111	false
6037	pp	P63137 (pp) P62812	false
6038	pp	P62812 (pp) P63328	false
6039	pp	P62812 (pp) P22723	false
6040	pp	O70325 (pp) Q99LX0	false
6041	pp	O70325 (pp) Q9D3D9	false
6042	pp	O70325 (pp) Q9ERS2	false
6043	pp	O70325 (pp) P99029	false
6044	pp	P48771 (pp) Q9DC69	false
6045	pp	P48771 (pp) Q91VR2	false
6046	pp	P48771 (pp) P56391	false
6047	pp	P48771 (pp) Q99LX0	false
6048	pp	P48771 (pp) Q06185	false
6049	pp	P48771 (pp) Q9D6J6	false
6050	pp	P48771 (pp) Q9CQH3	false
6051	pp	P48771 (pp) Q9CQ69	false
6052	pp	P48771 (pp) P43024	false
6053	pp	Q64133 (pp) P47738	false
6054	pp	Q64133 (pp) Q9JLJ2	false
6055	pp	Q64133 (pp) Q9CZS1	false
6056	pp	Q64133 (pp) Q9DBF1	false
6057	pp	P47738 (pp) P61922	false
6058	pp	P47738 (pp) Q8CHT0	false
6059	pp	P47738 (pp) Q9EQ20	false
6060	pp	P47738 (pp) Q8BW75	false
6061	pp	P63005 (pp) Q6PER3	false
6062	pp	P63005 (pp) O08788	false
6063	pp	P63005 (pp) Q99KJ8	false
6064	pp	P63005 (pp) P20357	false
6065	pp	Q6PER3 (pp) O08788	false
6066	pp	O70161 (pp) Q9Z1B3	false
6067	pp	O70161 (pp) P17426	false
6068	pp	O70161 (pp) Q71LX4	false
6069	pp	Q9Z1B3 (pp) Q01097	false
6070	pp	Q9Z1B3 (pp) P35438	false
6071	pp	Q921G7 (pp) Q8BWT1	false
6072	pp	Q921G7 (pp) Q61425	false
6073	pp	Q921G7 (pp) Q8BMS1	false
6074	pp	Q921G7 (pp) Q9D6J6	false
6075	pp	Q921G7 (pp) Q99JY0	false
6076	pp	Q921G7 (pp) Q9WUM5	false
6077	pp	Q921G7 (pp) Q80U28	false
6078	pp	Q921G7 (pp) Q9CQ62	false
6079	pp	Q921G7 (pp) Q99LC5	false
6080	pp	Q8BWT1 (pp) Q9D0K2	false
6081	pp	Q8BWT1 (pp) Q9DBL1	false
6082	pp	Q8BWT1 (pp) Q9EQ20	false
6083	pp	Q8BWT1 (pp) Q99JY0	false
6084	pp	Q8BWT1 (pp) Q8BMS1	false
6085	pp	Q8BWT1 (pp) Q9WUM5	false
6086	pp	Q8BWT1 (pp) O08756	false
6087	pp	Q8BWT1 (pp) Q91ZA3	false
6088	pp	Q9CQA3 (pp) Q9D0M3	false
6089	pp	Q9CQA3 (pp) Q9CZ13	false
6090	pp	Q9CQA3 (pp) Q06185	false
6091	pp	Q9CQA3 (pp) Q8K3J1	false
6092	pp	Q9CQA3 (pp) Q9Z2I9	false
6093	pp	Q9CQA3 (pp) Q9Z1P6	false
6094	pp	Q9CQA3 (pp) Q9DCS9	false
6095	pp	Q9CQA3 (pp) Q9CQZ6	false
6096	pp	Q9CQA3 (pp) Q9D2G2	false
6097	pp	Q9CQA3 (pp) Q9DCJ5	false
6098	pp	Q9CQA3 (pp) P54071	false
6099	pp	Q9CQA3 (pp) Q99KI0	false
6100	pp	Q9CQA3 (pp) Q9CQ62	false
6101	pp	Q9CQA3 (pp) Q9DB20	false
6102	pp	Q9CQA3 (pp) Q9D855	false
6103	pp	Q9CQA3 (pp) P97807	false
6104	pp	Q9CQA3 (pp) P70404	false
6105	pp	Q9CQA3 (pp) Q9CPQ1	false
6106	pp	Q9CQA3 (pp) Q9CQH3	false
6107	pp	Q9CQA3 (pp) P52503	false
6108	pp	Q9CQA3 (pp) Q9DC69	false
6109	pp	Q9CQA3 (pp) Q9WUM5	false
6110	pp	Q9CQA3 (pp) Q9D6J5	false
6111	pp	Q9CQA3 (pp) P56391	false
6112	pp	Q9CQA3 (pp) Q9DB77	false
6113	pp	Q9CQA3 (pp) Q9CQ75	false
6114	pp	Q9CQA3 (pp) Q8K2B3	false
6115	pp	Q9CQA3 (pp) Q9CR68	false
6116	pp	Q9CQA3 (pp) Q91VD9	false
6117	pp	Q9CQA3 (pp) Q9D6J6	false
6118	pp	Q9CQA3 (pp) P20108	false
6119	pp	Q9CQA3 (pp) Q9CQZ5	false
6120	pp	Q9CQA3 (pp) Q99LC5	false
6121	pp	Q9CQA3 (pp) Q9CQQ7	false
6122	pp	Q9CQA3 (pp) Q7TMF3	false
6123	pp	Q9CQA3 (pp) Q03265	false
6124	pp	Q9CQA3 (pp) Q91VR2	false
6125	pp	Q9CQA3 (pp) Q61425	false
6126	pp	Q9CQA3 (pp) Q64521	false
6127	pp	Q9CQA3 (pp) Q8VEM8	false
6128	pp	Q9CQA3 (pp) Q91YT0	false
6129	pp	Q9CQA3 (pp) Q9DCX2	false
6130	pp	Q9CQA3 (pp) P56480	false
6131	pp	Q9CQA3 (pp) P97450	false
6132	pp	Q9CQA3 (pp) Q9DCD0	false
6133	pp	Q9CQA3 (pp) Q9CPP6	false
6134	pp	Q9CQA3 (pp) Q91WD5	false
6135	pp	Q9CQA3 (pp) P19783	false
6136	pp	Q9CQA3 (pp) Q9D6R2	false
6137	pp	Q9CQA3 (pp) Q9DC70	false
6138	pp	Q9CQA3 (pp) Q9CQ69	false
6139	pp	Q9CQA3 (pp) P17751	false
6140	pp	Q9CQA3 (pp) P43024	false
6141	pp	Q9CQA3 (pp) O09111	false
6142	pp	Q9CQA3 (pp) Q9D3D9	false
6143	pp	Q9CQA3 (pp) Q99LX0	false
6144	pp	Q9CQA3 (pp) P19536	false
6145	pp	Q9CQA3 (pp) P99029	false
6146	pp	Q9CQA3 (pp) Q9ERS2	false
6147	pp	Q9CQA3 (pp) Q9CQJ8	false
6148	pp	Q9CQA3 (pp) P08249	false
6149	pp	Q9CQA3 (pp) Q60597	false
6150	pp	P12787 (pp) Q9CR68	false
6151	pp	P12787 (pp) P52503	false
6152	pp	P12787 (pp) Q9D6R2	false
6153	pp	P12787 (pp) Q9DCS9	false
6154	pp	P12787 (pp) Q99LC5	false
6155	pp	P12787 (pp) Q9D3D9	false
6156	pp	P12787 (pp) Q8K3J1	false
6157	pp	P12787 (pp) Q7TMF3	false
6158	pp	P12787 (pp) Q8VEM8	false
6159	pp	P12787 (pp) P17665	false
6160	pp	P12787 (pp) Q9DC69	false
6161	pp	P12787 (pp) Q9DCW4	false
6162	pp	P12787 (pp) P97450	false
6163	pp	P12787 (pp) Q9DCT2	false
6164	pp	P12787 (pp) P56391	false
6165	pp	P12787 (pp) Q9ERS2	false
6166	pp	P12787 (pp) P19783	false
6167	pp	P12787 (pp) Q9CQQ7	false
6168	pp	P12787 (pp) Q9D6J6	false
6169	pp	P12787 (pp) Q9DB20	false
6170	pp	P12787 (pp) P00405	false
6171	pp	P12787 (pp) Q9CQZ5	false
6172	pp	P12787 (pp) Q9DCJ5	false
6173	pp	P12787 (pp) Q9D0M3	false
6174	pp	P12787 (pp) Q9D6J5	false
6175	pp	P12787 (pp) Q9CQ69	false
6176	pp	P12787 (pp) Q9CQJ8	false
6177	pp	P12787 (pp) Q9CPQ1	false
6178	pp	P12787 (pp) Q9DC70	false
6179	pp	P12787 (pp) Q9CQ54	false
6180	pp	P12787 (pp) Q91VR2	false
6181	pp	P12787 (pp) Q99LC3	false
6182	pp	P12787 (pp) Q9DCX2	false
6183	pp	P12787 (pp) Q9CQH3	false
6184	pp	P12787 (pp) P09671	false
6185	pp	P12787 (pp) Q03265	false
6186	pp	P12787 (pp) Q9D855	false
6187	pp	P12787 (pp) Q9CQA3	false
6188	pp	P12787 (pp) Q9DB77	false
6189	pp	P12787 (pp) P43024	false
6190	pp	P12787 (pp) P19536	false
6191	pp	P12787 (pp) Q9CQZ6	false
6192	pp	P12787 (pp) Q9CXZ1	false
6193	pp	P12787 (pp) Q06185	false
6194	pp	P12787 (pp) P56480	false
6195	pp	Q61425 (pp) Q99LC5	false
6196	pp	Q61425 (pp) Q9WUM5	false
6197	pp	Q61425 (pp) Q9DBL1	false
6198	pp	Q61425 (pp) Q9D0K2	false
6199	pp	Q61425 (pp) Q9CZS1	false
6200	pp	Q61425 (pp) Q8BMS1	false
6201	pp	Q61425 (pp) Q9CQ62	false
6202	pp	Q61425 (pp) Q8BWT1	false
6203	pp	Q61425 (pp) Q99JY0	false
6204	pp	Q61425 (pp) O08756	false
6205	pp	Q61425 (pp) P47738	false
6206	pp	Q61425 (pp) Q8QZT1	false
6207	pp	Q61425 (pp) Q9EQ20	false
6208	pp	Q99LC5 (pp) O09111	false
6209	pp	Q99LC5 (pp) P50544	false
6210	pp	Q99LC5 (pp) Q9D6J6	false
6211	pp	Q99LC5 (pp) Q9DCJ5	false
6212	pp	Q99LC5 (pp) Q6PB66	false
6213	pp	Q99LC5 (pp) Q91ZJ5	false
6214	pp	Q99LC5 (pp) Q9CQH3	false
6215	pp	Q99LC5 (pp) Q80U28	false
6216	pp	Q99LC5 (pp) Q91VR2	false
6217	pp	Q99LC5 (pp) Q9DBL1	false
6218	pp	Q99LC5 (pp) Q99JY0	false
6219	pp	Q99LC5 (pp) O08756	false
6220	pp	Q99LC5 (pp) Q91YT0	false
6221	pp	Q99LC5 (pp) Q9Z0X1	false
6222	pp	Q99LC5 (pp) Q8BWT1	false
6223	pp	Q99LC5 (pp) Q9WUM5	false
6224	pp	Q99LC5 (pp) Q9CR68	false
6225	pp	Q99LC5 (pp) O88441	false
6226	pp	Q99LC5 (pp) Q9DC69	false
6227	pp	Q8BGH2 (pp) Q99LX0	false
6228	pp	Q8BGH2 (pp) Q8BH95	false
6229	pp	Q8BGH2 (pp) Q8CAQ8	false
6230	pp	Q8BGH2 (pp) Q9CZ13	false
6231	pp	Q8BGH2 (pp) Q9DC69	false
6232	pp	Q8BGH2 (pp) Q9QYA2	false
6233	pp	Q8BGH2 (pp) O88441	false
6234	pp	Q8BGH2 (pp) P97807	false
6235	pp	Q8BGH2 (pp) Q9CRB9	false
6236	pp	Q8BGH2 (pp) Q9DCJ5	false
6237	pp	Q8BGH2 (pp) Q9WUM5	false
6238	pp	Q8BGH2 (pp) Q91YT0	false
6239	pp	Q99LX0 (pp) Q62277	false
6240	pp	Q99LX0 (pp) O09111	false
6241	pp	Q99LX0 (pp) Q9D6J6	false
6242	pp	Q99LX0 (pp) O55042	false
6243	pp	Q99LX0 (pp) O08756	false
6244	pp	Q99LX0 (pp) Q91VR2	false
6245	pp	Q99LX0 (pp) Q9CQH3	false
6246	pp	P62331 (pp) O70161	false
6247	pp	Q8K1Z0 (pp) Q9DCJ5	false
6248	pp	Q8K1Z0 (pp) Q9WUM5	false
6249	pp	Q8K1Z0 (pp) Q9D6J6	false
6250	pp	Q8K1Z0 (pp) Q9ERS2	false
6251	pp	P11499 (pp) P62259	false
6252	pp	P11499 (pp) Q60864	false
6253	pp	P11499 (pp) P63038	false
6254	pp	P11499 (pp) P63037	false
6255	pp	P11499 (pp) P60710	false
6256	pp	P11499 (pp) Q9CR16	false
6257	pp	P05064 (pp) P17710	false
6258	pp	P05064 (pp) Q9WUA3	false
6259	pp	P05064 (pp) P17182	false
6260	pp	P05064 (pp) Q61735	false
6261	pp	P05064 (pp) P05063	false
6262	pp	P17710 (pp) Q9WUA3	false
6263	pp	P48320 (pp) P61922	false
6264	pp	P48320 (pp) P15105	false
6265	pp	P61922 (pp) Q9DBF1	false
6266	pp	P61922 (pp) P15105	false
6267	pp	P61922 (pp) Q9EQ20	false
6268	pp	P12023 (pp) P46460	false
6269	pp	P12023 (pp) Q9WV18	false
6270	pp	P12023 (pp) P04925	false
6271	pp	P12023 (pp) P63044	false
6272	pp	P12023 (pp) P62823	false
6273	pp	P12023 (pp) Q9CZT8	false
6274	pp	P12023 (pp) P06837	false
6275	pp	P12023 (pp) P63011	false
6276	pp	P12023 (pp) O35526	false
6277	pp	P12023 (pp) O08756	false
6278	pp	P12023 (pp) P68254	false
6279	pp	P12023 (pp) Q8VDN2	false
6280	pp	P12023 (pp) Q9JHU4	false
6281	pp	P12023 (pp) Q62277	false
6282	pp	P12023 (pp) Q9Z1G3	false
6283	pp	P12023 (pp) Q810U3	false
6284	pp	P12023 (pp) P62259	false
6285	pp	P12023 (pp) Q9D6F9	false
6286	pp	P12023 (pp) Q61548	false
6287	pp	P12023 (pp) Q60932	false
6288	pp	P12023 (pp) P35564	false
6289	pp	P12023 (pp) P56564	false
6290	pp	P12023 (pp) Q64332	false
6291	pp	P12023 (pp) O88935	false
6292	pp	P12023 (pp) P07901	false
6293	pp	P12023 (pp) P61982	false
6294	pp	P12023 (pp) O88737	false
6295	pp	P12023 (pp) P13595	false
6296	pp	P12023 (pp) Q9JIS5	false
6297	pp	P12023 (pp) P63101	false
6298	pp	P12023 (pp) P60710	false
6299	pp	P12023 (pp) P68510	false
6300	pp	P12023 (pp) O08599	false
6301	pp	P12023 (pp) P39053	false
6302	pp	P12023 (pp) P12960	false
6303	pp	P12023 (pp) P08551	false
6304	pp	P12023 (pp) P62821	false
6305	pp	P12023 (pp) P46096	false
6306	pp	P12023 (pp) P57780	false
6307	pp	P12023 (pp) Q91ZZ3	false
6308	pp	P12023 (pp) P28652	false
6309	pp	P12023 (pp) O54991	false
6310	pp	P12023 (pp) Q812A2	false
6311	pp	P12023 (pp) P46660	false
6312	pp	P12023 (pp) P60879	false
6313	pp	P12023 (pp) O55042	false
6314	pp	P12023 (pp) P97300	false
6315	pp	P12023 (pp) Q62420	false
6316	pp	P12023 (pp) P01831	false
6317	pp	P12023 (pp) Q68FD5	false
6318	pp	P12023 (pp) Q9Z1G4	false
6319	pp	P12023 (pp) Q9CQV8	false
6320	pp	P12023 (pp) Q61316	false
6321	pp	P12023 (pp) P11627	false
6322	pp	P12023 (pp) P63017	false
6323	pp	P12023 (pp) P61264	false
6324	pp	P62814 (pp) P51863	false
6325	pp	P62814 (pp) P50516	false
6326	pp	P62814 (pp) Q8BVE3	false
6327	pp	P62814 (pp) P57746	false
6328	pp	P62814 (pp) Q9DC69	false
6329	pp	P62814 (pp) Q9Z1G3	false
6330	pp	P62814 (pp) P63082	false
6331	pp	P62814 (pp) Q91VM9	false
6332	pp	P62814 (pp) P50518	false
6333	pp	P62814 (pp) Q9WTT4	false
6334	pp	P62814 (pp) Q9Z1G4	false
6335	pp	Q9WV92 (pp) Q8R5M8	false
6336	pp	Q9WV92 (pp) P12023	false
6337	pp	Q8R5M8 (pp) O70589	false
6338	pp	O35526 (pp) Q62442	false
6339	pp	O35526 (pp) P63040	false
6340	pp	O35526 (pp) P60879	false
6341	pp	O35526 (pp) O08599	false
6342	pp	Q9WV18 (pp) Q80T41	false
6343	pp	P56391 (pp) O09111	false
6344	pp	P56391 (pp) Q9D3D9	false
6345	pp	P56391 (pp) Q9ERS2	false
6346	pp	P56391 (pp) P00405	false
6347	pp	P56391 (pp) P17665	false
6348	pp	P56391 (pp) Q9DCX2	false
6349	pp	Q9D172 (pp) Q9CQH3	false
6350	pp	Q9D172 (pp) P97807	false
6351	pp	Q9D172 (pp) Q91YT0	false
6352	pp	Q9D172 (pp) Q9CQZ5	false
6353	pp	Q9D172 (pp) Q9DCT2	false
6354	pp	Q9D172 (pp) Q9CZ13	false
6355	pp	Q9D172 (pp) Q91WD5	false
6356	pp	Q9D172 (pp) Q8BH95	false
6357	pp	Q9D172 (pp) Q9DCJ5	false
6358	pp	Q9D172 (pp) P42125	false
6359	pp	Q9D172 (pp) Q9DC70	false
6360	pp	Q62442 (pp) P61264	false
6361	pp	P26443 (pp) Q91Z53	false
6362	pp	P26443 (pp) Q61425	false
6363	pp	P26443 (pp) P97807	false
6364	pp	P26443 (pp) P05202	false
6365	pp	P26443 (pp) P15105	false
6366	pp	P26443 (pp) Q9D6R2	false
6367	pp	P26443 (pp) Q8BH04	false
6368	pp	P26443 (pp) Q8CHT0	false
6369	pp	P26443 (pp) P29758	false
6370	pp	P26443 (pp) P05063	false
6371	pp	P26443 (pp) Q05920	false
6372	pp	P26443 (pp) P61922	false
6373	pp	P26443 (pp) P17751	false
6374	pp	P26443 (pp) Q60597	false
6375	pp	P26443 (pp) P70404	false
6376	pp	P26443 (pp) P56480	false
6377	pp	P26443 (pp) P63038	false
6378	pp	P26443 (pp) Q99KI0	false
6379	pp	P26443 (pp) P48320	false
6380	pp	P26443 (pp) P54071	false
6381	pp	P26443 (pp) Q9DCD0	false
6382	pp	Q91Z53 (pp) P45376	false
6383	pp	Q99KJ8 (pp) O08788	false
6384	pp	Q99KJ8 (pp) P28667	false
6385	pp	O08788 (pp) O35465	false
6386	pp	Q99KI0 (pp) Q9D2G2	false
6387	pp	Q99KI0 (pp) Q62351	false
6388	pp	Q99KI0 (pp) Q91VR2	false
6389	pp	Q99KI0 (pp) Q9CQH3	false
6390	pp	Q99KI0 (pp) P17751	false
6391	pp	Q99KI0 (pp) Q9DC69	false
6392	pp	Q99KI0 (pp) Q9DB77	false
6393	pp	Q99KI0 (pp) Q9CZ13	false
6394	pp	Q99KI0 (pp) P63038	false
6395	pp	Q99KI0 (pp) P54071	false
6396	pp	Q99KI0 (pp) P47857	false
6397	pp	Q99KI0 (pp) P52480	false
6398	pp	Q99KI0 (pp) Q05920	false
6399	pp	Q99KI0 (pp) Q9D3D9	false
6400	pp	Q99KI0 (pp) P70404	false
6401	pp	Q99KI0 (pp) O09111	false
6402	pp	Q99KI0 (pp) Q9D6R2	false
6403	pp	Q99KI0 (pp) Q9ERS2	false
6404	pp	Q99KI0 (pp) Q91YT0	false
6405	pp	Q99KI0 (pp) Q9CR68	false
6406	pp	Q99KI0 (pp) P06745	false
6407	pp	Q99KI0 (pp) Q9DB20	false
6408	pp	Q99KI0 (pp) Q9DCJ5	false
6409	pp	Q99KI0 (pp) Q9D0M3	false
6410	pp	Q99KI0 (pp) Q9CPP6	false
6411	pp	Q99KI0 (pp) Q8K1M6	false
6412	pp	Q99KI0 (pp) P68510	false
6413	pp	Q99KI0 (pp) Q9WUM5	false
6414	pp	Q99KI0 (pp) Q60597	false
6415	pp	Q99KI0 (pp) Q99LX0	false
6416	pp	Q99KI0 (pp) P35486	false
6417	pp	Q99KI0 (pp) Q9Z1J3	false
6418	pp	Q99KI0 (pp) Q03265	false
6419	pp	Q99KI0 (pp) Q01097	false
6420	pp	Q99KI0 (pp) P97807	false
6421	pp	Q99KI0 (pp) P56480	false
6422	pp	Q99KI0 (pp) P05064	false
6423	pp	Q99KI0 (pp) Q9D6J6	false
6424	pp	Q9ERS2 (pp) P50516	false
6425	pp	Q9ERS2 (pp) Q91VR2	false
6426	pp	Q9ERS2 (pp) O09111	false
6427	pp	Q9ERS2 (pp) Q9D6J6	false
6428	pp	Q9ERS2 (pp) Q9CQH3	false
6429	pp	P97807 (pp) Q06185	false
6430	pp	P97807 (pp) P54071	false
6431	pp	P97807 (pp) Q99LX0	false
6432	pp	P97807 (pp) Q9D2G2	false
6433	pp	P97807 (pp) Q9D6R2	false
6434	pp	P97807 (pp) Q9CQQ7	false
6435	pp	P97807 (pp) P48771	false
6436	pp	P97807 (pp) O08756	false
6437	pp	P97807 (pp) Q9DCD0	false
6438	pp	P97807 (pp) Q9DCJ5	false
6439	pp	P97807 (pp) Q9DCS9	false
6440	pp	P97807 (pp) Q99LC5	false
6441	pp	P97807 (pp) Q9DC69	false
6442	pp	P97807 (pp) Q60597	false
6443	pp	P97807 (pp) Q05920	false
6444	pp	P97807 (pp) Q91VR2	false
6445	pp	P97807 (pp) Q91YT0	false
6446	pp	P97807 (pp) Q8K3J1	false
6447	pp	P97807 (pp) P06151	false
6448	pp	P97807 (pp) Q9WUM5	false
6449	pp	P97807 (pp) Q9D6J6	false
6450	pp	P97807 (pp) P06745	false
6451	pp	P97807 (pp) Q8BMF4	false
6452	pp	P97807 (pp) Q61425	false
6453	pp	P97807 (pp) Q9CR68	false
6454	pp	P97807 (pp) Q921G7	false
6455	pp	P97807 (pp) Q9CQH3	false
6456	pp	P97807 (pp) Q60931	false
6457	pp	P97807 (pp) P05202	false
6458	pp	Q6PHZ2 (pp) P60710	false
6459	pp	Q6PHZ2 (pp) P99024	false
6460	pp	Q6PHZ2 (pp) P35436	false
6461	pp	Q6PHZ2 (pp) P63101	false
6462	pp	Q6PHZ2 (pp) P68369	false
6463	pp	P60710 (pp) Q9R0Q6	false
6464	pp	P60710 (pp) P59999	false
6465	pp	P60710 (pp) Q9D898	false
6466	pp	P60710 (pp) P35438	false
6467	pp	P60710 (pp) P16054	false
6468	pp	P60710 (pp) Q9CPW4	false
6469	pp	P60710 (pp) Q9JM76	false
6470	pp	P60710 (pp) O70589	false
6471	pp	Q02248 (pp) P05480	false
6472	pp	Q02248 (pp) Q61301	false
6473	pp	Q02248 (pp) P35438	false
6474	pp	Q02248 (pp) P39688	false
6475	pp	Q02248 (pp) P68510	false
6476	pp	Q02248 (pp) Q68FH0	false
6477	pp	Q02248 (pp) O88712	false
6478	pp	Q02248 (pp) Q01097	false
6479	pp	Q02248 (pp) P63001	false
6480	pp	P05480 (pp) P35436	false
6481	pp	P05480 (pp) P35438	false
6482	pp	P05480 (pp) P39053	false
6483	pp	P05480 (pp) P30999	false
6484	pp	P05480 (pp) P23242	false
6485	pp	P51881 (pp) P62259	false
6486	pp	P51881 (pp) P16054	false
6487	pp	Q91WD5 (pp) Q8K2B3	false
6488	pp	Q91WD5 (pp) Q9CQZ6	false
6489	pp	Q91WD5 (pp) Q99MN9	false
6490	pp	Q91WD5 (pp) Q9DCJ5	false
6491	pp	Q91WD5 (pp) P08249	false
6492	pp	Q91WD5 (pp) P70404	false
6493	pp	Q91WD5 (pp) Q8VEM8	false
6494	pp	Q91WD5 (pp) Q9D0M3	false
6495	pp	Q91WD5 (pp) Q99KI0	false
6496	pp	Q91WD5 (pp) Q99JY0	false
6497	pp	Q91WD5 (pp) Q91VR2	false
6498	pp	Q91WD5 (pp) Q9CQ69	false
6499	pp	Q91WD5 (pp) Q9D855	false
6500	pp	Q91WD5 (pp) Q9CQH3	false
6501	pp	Q91WD5 (pp) Q9DC70	false
6502	pp	Q91WD5 (pp) P97807	false
6503	pp	Q91WD5 (pp) Q9CQQ7	false
6504	pp	Q91WD5 (pp) Q99LX0	false
6505	pp	Q91WD5 (pp) Q99LC3	false
6506	pp	Q91WD5 (pp) Q9CQZ5	false
6507	pp	Q91WD5 (pp) P97450	false
6508	pp	Q91WD5 (pp) Q9CQC7	false
6509	pp	Q91WD5 (pp) Q9CQJ8	false
6510	pp	Q91WD5 (pp) Q9DB77	false
6511	pp	Q91WD5 (pp) Q9CXZ1	false
6512	pp	Q91WD5 (pp) Q9D6J6	false
6513	pp	Q91WD5 (pp) Q9DCS9	false
6514	pp	Q91WD5 (pp) Q9CR68	false
6515	pp	Q91WD5 (pp) Q3ULD5	false
6516	pp	Q91WD5 (pp) P20108	false
6517	pp	Q91WD5 (pp) Q8BGH2	false
6518	pp	Q91WD5 (pp) Q03265	false
6519	pp	Q91WD5 (pp) Q7TMF3	false
6520	pp	Q91WD5 (pp) Q8CAQ8	false
6521	pp	Q91WD5 (pp) Q6PB66	false
6522	pp	Q91WD5 (pp) P56480	false
6523	pp	Q91WD5 (pp) Q8K3J1	false
6524	pp	Q91WD5 (pp) Q9D6J5	false
6525	pp	Q91WD5 (pp) Q9CQ75	false
6526	pp	Q91WD5 (pp) Q9ERS2	false
6527	pp	Q91WD5 (pp) Q8K1Z0	false
6528	pp	Q91WD5 (pp) P52503	false
6529	pp	Q91WD5 (pp) P17751	false
6530	pp	Q91WD5 (pp) Q8BH95	false
6531	pp	Q91WD5 (pp) Q99LC5	false
6532	pp	Q91WD5 (pp) Q9CZ13	false
6533	pp	Q91WD5 (pp) Q9DB20	false
6534	pp	Q91WD5 (pp) P09411	false
6535	pp	Q91WD5 (pp) Q91VD9	false
6536	pp	Q91WD5 (pp) P35486	false
6537	pp	Q91WD5 (pp) Q9WUM5	false
6538	pp	Q91WD5 (pp) Q9DC69	false
6539	pp	Q91WD5 (pp) Q91YT0	false
6540	pp	Q91WD5 (pp) Q99LY9	false
6541	pp	Q91WD5 (pp) Q9CPP6	false
6542	pp	Q8K2B3 (pp) P97807	false
6543	pp	Q8K2B3 (pp) Q8JZQ2	false
6544	pp	Q8K2B3 (pp) Q8VEM8	false
6545	pp	Q8K2B3 (pp) Q9D0M3	false
6546	pp	Q8K2B3 (pp) Q91VR2	false
6547	pp	Q8K2B3 (pp) Q9D2G2	false
6548	pp	Q8K2B3 (pp) Q9Z0X1	false
6549	pp	Q8K2B3 (pp) Q9D051	false
6550	pp	Q8K2B3 (pp) Q03265	false
6551	pp	Q8K2B3 (pp) P52196	false
6552	pp	Q8K2B3 (pp) Q9CPP6	false
6553	pp	Q8K2B3 (pp) Q9CQQ7	false
6554	pp	Q8K2B3 (pp) Q99KI0	false
6555	pp	Q8K2B3 (pp) P09411	false
6556	pp	Q8K2B3 (pp) Q91YT0	false
6557	pp	Q8K2B3 (pp) Q9Z2I9	false
6558	pp	Q8K2B3 (pp) P00493	false
6559	pp	Q8K2B3 (pp) Q60597	false
6560	pp	Q8K2B3 (pp) P56480	false
6561	pp	Q8K2B3 (pp) Q9WUM5	false
6562	pp	Q8K2B3 (pp) Q99LC5	false
6563	pp	Q8K2B3 (pp) Q9CR68	false
6564	pp	Q8K2B3 (pp) Q9CZ13	false
6565	pp	Q8K2B3 (pp) Q9DC69	false
6566	pp	Q8K2B3 (pp) Q9D6J6	false
6567	pp	Q8K2B3 (pp) Q9DB77	false
6568	pp	Q8K2B3 (pp) P35486	false
6569	pp	Q8K2B3 (pp) Q8K3J1	false
6570	pp	Q8K2B3 (pp) P63038	false
6571	pp	Q8K2B3 (pp) Q9D6R2	false
6572	pp	Q8K2B3 (pp) Q91VD9	false
6573	pp	Q8K2B3 (pp) P17751	false
6574	pp	Q8K2B3 (pp) P58281	false
6575	pp	Q8K2B3 (pp) Q99JY0	false
6576	pp	P68369 (pp) P39053	false
6577	pp	P68369 (pp) P27546	false
6578	pp	P68369 (pp) P63101	false
6579	pp	P68369 (pp) P35438	false
6580	pp	P68369 (pp) P60879	false
6581	pp	Q8VEM8 (pp) Q9D6J6	false
6582	pp	Q8VEM8 (pp) Q9CQH3	false
6583	pp	Q8VEM8 (pp) Q9CQQ7	false
6584	pp	Q8VEM8 (pp) Q9D3D9	false
6585	pp	Q3ULD5 (pp) Q8R4N0	false
6586	pp	Q3ULD5 (pp) Q99MN9	false
6587	pp	Q3ULD5 (pp) Q9JHI5	false
6588	pp	Q3ULD5 (pp) Q921G7	false
6589	pp	Q3ULD5 (pp) Q8BMS1	false
6590	pp	Q3ULD5 (pp) Q8BH95	false
6591	pp	Q3ULD5 (pp) Q91ZA3	false
6592	pp	Q3ULD5 (pp) Q99MR8	false
6593	pp	Q3ULD5 (pp) Q9D0K2	false
6594	pp	Q3ULD5 (pp) Q05920	false
6595	pp	Q8R4N0 (pp) Q91ZA3	false
6596	pp	Q8R4N0 (pp) Q99MR8	false
6597	pp	Q8R4N0 (pp) P05480	false
6598	pp	Q8R4N0 (pp) Q9WUM5	false
6599	pp	Q8R4N0 (pp) Q99LC5	false
6600	pp	P52503 (pp) Q9D6J6	false
6601	pp	P52503 (pp) P48771	false
6602	pp	P52503 (pp) Q9CQZ6	false
6603	pp	P52503 (pp) Q91YT0	false
6604	pp	P52503 (pp) Q9CZ13	false
6605	pp	P52503 (pp) Q91VD9	false
6606	pp	P52503 (pp) Q9CQZ5	false
6607	pp	P52503 (pp) P42125	false
6608	pp	P52503 (pp) P43024	false
6609	pp	P52503 (pp) P62073	false
6610	pp	P52503 (pp) Q9DC69	false
6611	pp	P52503 (pp) Q8K3J1	false
6612	pp	P52503 (pp) Q9CQQ7	false
6613	pp	P52503 (pp) Q9CQJ8	false
6614	pp	P52503 (pp) Q9CQH3	false
6615	pp	P52503 (pp) Q9CR68	false
6616	pp	P52503 (pp) P56391	false
6617	pp	P52503 (pp) Q9DB20	false
6618	pp	P52503 (pp) Q99LC3	false
6619	pp	P52503 (pp) P97450	false
6620	pp	P52503 (pp) Q99LX0	false
6621	pp	P52503 (pp) Q9DCJ5	false
6622	pp	P52503 (pp) Q9CXZ1	false
6623	pp	P52503 (pp) Q9D0M3	false
6624	pp	P52503 (pp) Q9CQC7	false
6625	pp	P52503 (pp) Q9D6J5	false
6626	pp	P52503 (pp) P99029	false
6627	pp	P52503 (pp) Q9ERS2	false
6628	pp	P52503 (pp) Q06185	false
6629	pp	P52503 (pp) Q9CQ54	false
6630	pp	P52503 (pp) P17665	false
6631	pp	P52503 (pp) Q9CPP6	false
6632	pp	P52503 (pp) Q99LY9	false
6633	pp	P52503 (pp) Q9DCS9	false
6634	pp	P52503 (pp) Q9D3D9	false
6635	pp	P52503 (pp) O08756	false
6636	pp	P52503 (pp) O09111	false
6637	pp	P52503 (pp) Q9CQ69	false
6638	pp	P52503 (pp) Q9Z1P6	false
6639	pp	Q60631 (pp) Q62277	false
6640	pp	Q60631 (pp) Q62420	false
6641	pp	Q60631 (pp) P18052	false
6642	pp	Q60631 (pp) P04925	false
6643	pp	Q60631 (pp) P20444	false
6644	pp	Q60631 (pp) P12023	false
6645	pp	Q60631 (pp) O08585	false
6646	pp	Q60631 (pp) P05480	false
6647	pp	Q60631 (pp) Q8CHC4	false
6648	pp	Q60631 (pp) P39053	false
6649	pp	Q60631 (pp) Q68FD5	false
6650	pp	Q62277 (pp) P60879	false
6651	pp	Q62277 (pp) P62204	false
6652	pp	Q62277 (pp) P46096	false
6653	pp	Q62277 (pp) P63044	false
6654	pp	Q62277 (pp) P01831	false
6655	pp	Q62277 (pp) P43006	false
6656	pp	P62073 (pp) P99029	false
6657	pp	P62073 (pp) O08756	false
6658	pp	P62073 (pp) Q9ERS2	false
6659	pp	P62073 (pp) Q925I1	false
6660	pp	P62073 (pp) Q9DCJ5	false
6661	pp	P62073 (pp) P56391	false
6662	pp	P62073 (pp) O35658	false
6663	pp	P62073 (pp) Q9CR68	false
6664	pp	P62073 (pp) Q9D3D9	false
6665	pp	P62073 (pp) Q9DCS9	false
6666	pp	P62073 (pp) P67778	false
6667	pp	P62073 (pp) Q9D6J6	false
6668	pp	P62073 (pp) Q9CQH3	false
6669	pp	P99029 (pp) Q9D6J6	false
6670	pp	Q9CQV8 (pp) P62259	false
6671	pp	Q9CQV8 (pp) P63101	false
6672	pp	Q9CQV8 (pp) P16054	false
6673	pp	Q9CQV8 (pp) Q64010	false
6674	pp	Q9CQV8 (pp) P10637	false
6675	pp	Q9CQR4 (pp) Q9CQH3	false
6676	pp	Q9CQR4 (pp) P97450	false
6677	pp	Q9CQR4 (pp) Q9D6J6	false
6678	pp	Q9CQR4 (pp) Q9DCD0	false
6679	pp	Q9CQR4 (pp) Q9CQZ6	false
6680	pp	Q9CQR4 (pp) Q9CQZ5	false
6681	pp	Q9CQR4 (pp) Q9DCJ5	false
6682	pp	Q9CQR4 (pp) Q99LC5	false
6683	pp	Q9CQR4 (pp) Q61425	false
6684	pp	P40142 (pp) P09411	false
6685	pp	P40142 (pp) Q9DCD0	false
6686	pp	P40142 (pp) P06745	false
6687	pp	P40142 (pp) Q93092	false
6688	pp	P40142 (pp) P16858	false
6689	pp	P40142 (pp) Q60597	false
6690	pp	P40142 (pp) P52480	false
6691	pp	P40142 (pp) P17751	false
6692	pp	P40142 (pp) P05064	false
6693	pp	P40142 (pp) P06151	false
6694	pp	P40142 (pp) P17182	false
6695	pp	P40142 (pp) P35486	false
6696	pp	P40142 (pp) Q9D0F9	false
6697	pp	P40142 (pp) P05063	false
6698	pp	P63213 (pp) P62874	false
6699	pp	P63213 (pp) P18872	false
6700	pp	P62874 (pp) P04925	false
6701	pp	Q99KR7 (pp) O35658	false
6702	pp	Q99KR7 (pp) P56480	false
6703	pp	O35658 (pp) P40630	false
6704	pp	O35658 (pp) Q9CQQ7	false
6705	pp	Q7TMF3 (pp) Q9DCX2	false
6706	pp	Q7TMF3 (pp) Q9CXZ1	false
6707	pp	Q7TMF3 (pp) O09111	false
6708	pp	Q7TMF3 (pp) Q9CR68	false
6709	pp	Q7TMF3 (pp) Q9CQ54	false
6710	pp	Q7TMF3 (pp) Q9DC69	false
6711	pp	Q7TMF3 (pp) Q62425	false
6712	pp	Q7TMF3 (pp) Q9D0M3	false
6713	pp	Q7TMF3 (pp) P97450	false
6714	pp	Q7TMF3 (pp) P52503	false
6715	pp	Q7TMF3 (pp) Q9D855	false
6716	pp	Q7TMF3 (pp) Q9DC70	false
6717	pp	Q7TMF3 (pp) Q9DCS9	false
6718	pp	Q7TMF3 (pp) Q9CQZ5	false
6719	pp	Q7TMF3 (pp) Q9CQQ7	false
6720	pp	Q7TMF3 (pp) Q9Z1P6	false
6721	pp	Q7TMF3 (pp) Q9DCJ5	false
6722	pp	Q7TMF3 (pp) Q9CQZ6	false
6723	pp	Q7TMF3 (pp) Q3UIU2	false
6724	pp	Q7TMF3 (pp) Q9ERS2	false
6725	pp	Q7TMF3 (pp) Q9CQJ8	false
6726	pp	Q7TMF3 (pp) Q9D6J5	false
6727	pp	Q7TMF3 (pp) Q99LY9	false
6728	pp	Q7TMF3 (pp) Q8K3J1	false
6729	pp	Q7TMF3 (pp) Q9CQC7	false
6730	pp	Q7TMF3 (pp) Q9CQH3	false
6731	pp	Q7TMF3 (pp) Q9D3D9	false
6732	pp	Q7TMF3 (pp) Q9D6J6	false
6733	pp	Q7TMF3 (pp) Q9CQ69	false
6734	pp	Q7TMF3 (pp) Q91YT0	false
6735	pp	Q7TMF3 (pp) Q91VD9	false
6736	pp	Q7TMF3 (pp) Q99LC3	false
6737	pp	Q9DCX2 (pp) Q9ERS2	false
6738	pp	Q9DCX2 (pp) Q99LX0	false
6739	pp	Q9DCX2 (pp) Q91VR2	false
6740	pp	Q9DCX2 (pp) Q9CQQ7	false
6741	pp	Q9DCX2 (pp) Q9D6J6	false
6742	pp	Q9DCX2 (pp) Q9CQH3	false
6743	pp	Q9DCX2 (pp) Q9D3D9	false
6744	pp	Q9DCX2 (pp) Q99LY9	false
6745	pp	Q61735 (pp) P97797	false
6746	pp	P50518 (pp) Q8BVE3	false
6747	pp	P50518 (pp) Q9Z1G4	false
6748	pp	P50518 (pp) P63082	false
6749	pp	P50518 (pp) P57746	false
6750	pp	P50518 (pp) Q9WTT4	false
6751	pp	P50518 (pp) Q9Z1G3	false
6752	pp	P50518 (pp) P50516	false
[truncated: 1,394 more rows]
