# Supplementary material for: APP Is a Context-Sensitive Regulator of the Hippocampal Presynaptic Active Zone
Source: PLOS journal article supplement (doi:10.1371/journal.pcbi.1004832), 2016-04-19
Supplement: S6 (10.1371/journal.pcbi.1004832.s006) [file journal.pcbi.1004832.s006.cys › CytoscapeSession-2016_01_22-10_07/tables/8147-Core+Network+Communities/HIDDEN-org.cytoscape.model.CyNode-8147+hidden+node.cytable]

"CyCSV-Version","1"
"SUID"
"java.lang.Long"
""
"8147 hidden node",""
