# Supplementary material for: APP Is a Context-Sensitive Regulator of the Hippocampal Presynaptic Active Zone
Source: PLOS journal article supplement (doi:10.1371/journal.pcbi.1004832), 2016-04-19
Supplement: S6 (10.1371/journal.pcbi.1004832.s006) [file journal.pcbi.1004832.s006.cys › CytoscapeSession-2016_01_22-10_07/tables/8147-Core+Network+Communities/SHARED_ATTRS-org.cytoscape.model.CyEdge-8147+shared+edge.cytable]

CyCSV-Version	1
SUID	shared interaction	shared name
java.lang.Long	java.lang.String	java.lang.String
8147 shared edge
8788	pp	Q01097 (pp) Q80Z38
8789	pp	Q01097 (pp) P05132
8790	pp	Q01097 (pp) P15105
8791	pp	Q01097 (pp) O35526
8792	pp	Q01097 (pp) P51881
8793	pp	Q01097 (pp) P68510
8794	pp	Q01097 (pp) Q60676
8795	pp	Q01097 (pp) P12367
8796	pp	Q01097 (pp) P63085
8797	pp	Q01097 (pp) P47754
8798	pp	Q01097 (pp) Q03265
8799	pp	Q01097 (pp) P62835
8800	pp	Q01097 (pp) Q6PHZ2
8801	pp	Q01097 (pp) Q9D6M3
8802	pp	Q01097 (pp) P63101
8803	pp	Q01097 (pp) P17426
8804	pp	Q01097 (pp) P68033
8805	pp	Q01097 (pp) P68369
8806	pp	Q01097 (pp) P47757
8807	pp	Q01097 (pp) P05063
8808	pp	Q01097 (pp) P20357
8809	pp	Q01097 (pp) P31938
8810	pp	Q01097 (pp) P16054
8811	pp	Q01097 (pp) P51863
8812	pp	Q01097 (pp) P16858
8813	pp	Q01097 (pp) P06151
8814	pp	Q01097 (pp) P60879
8815	pp	Q01097 (pp) O88952
8816	pp	Q01097 (pp) P05480
8817	pp	Q01097 (pp) P50516
8818	pp	Q01097 (pp) P63318
8819	pp	Q01097 (pp) P97772
8820	pp	Q01097 (pp) P68404
8821	pp	Q01097 (pp) O55100
8822	pp	Q01097 (pp) Q91VR2
8823	pp	Q01097 (pp) P35279
8824	pp	Q01097 (pp) P63321
8825	pp	Q01097 (pp) P61982
8826	pp	Q01097 (pp) P60710
8827	pp	Q01097 (pp) P08553
8828	pp	Q01097 (pp) P62204
8829	pp	Q01097 (pp) Q61411
8830	pp	Q01097 (pp) P62259
8831	pp	Q01097 (pp) P48962
8832	pp	Q01097 (pp) O08599
8833	pp	Q01097 (pp) Q923T9
8834	pp	Q01097 (pp) Q9JM76
8835	pp	Q01097 (pp) P46096
8836	pp	Q01097 (pp) P63328
8837	pp	Q01097 (pp) P63001
8838	pp	Q01097 (pp) P59999
8839	pp	Q01097 (pp) F6SEU4
8840	pp	Q01097 (pp) P63011
8841	pp	Q01097 (pp) Q8BH59
8842	pp	Q01097 (pp) P17751
8843	pp	Q01097 (pp) O88737
8844	pp	Q01097 (pp) P06837
8845	pp	Q01097 (pp) P43006
8846	pp	Q01097 (pp) Q9CVB6
8847	pp	Q01097 (pp) P08551
8848	pp	Q01097 (pp) P11627
8849	pp	Q01097 (pp) P13020
8850	pp	Q01097 (pp) P05202
8851	pp	Q01097 (pp) P62874
8852	pp	Q01097 (pp) P35438
8853	pp	Q01097 (pp) P30999
8854	pp	Q01097 (pp) D3YVF0
8855	pp	Q01097 (pp) Q9QXS6
8856	pp	Q01097 (pp) P39053
8857	pp	Q01097 (pp) P63330
8858	pp	Q01097 (pp) P46660
8859	pp	Q01097 (pp) P53994
8860	pp	Q01097 (pp) P35436
8861	pp	Q01097 (pp) O35129
8862	pp	Q01097 (pp) P68181
8863	pp	Q01097 (pp) Q61879
8864	pp	Q01097 (pp) P31324
8865	pp	Q01097 (pp) P57780
8866	pp	Q01097 (pp) P15116
8867	pp	Q01097 (pp) A2CG49
8868	pp	Q01097 (pp) P12382
8869	pp	Q80Z38 (pp) Q8BYM5
8870	pp	Q80Z38 (pp) P35438
8871	pp	Q9CQZ5 (pp) Q9D6J6
8872	pp	Q9CQZ5 (pp) P48771
8873	pp	Q9CQZ5 (pp) Q91VR2
8874	pp	Q9CQZ5 (pp) Q91VD9
8875	pp	Q9CQZ5 (pp) Q9CPP6
8876	pp	Q9CQZ5 (pp) Q9CQZ6
8877	pp	Q9CQZ5 (pp) P19536
8878	pp	Q9CQZ5 (pp) O09111
8879	pp	Q9CQZ5 (pp) P97450
8880	pp	Q9CQZ5 (pp) Q91YT0
8881	pp	Q9CQZ5 (pp) Q9CQ69
8882	pp	Q9CQZ5 (pp) Q99LC5
8883	pp	Q9CQZ5 (pp) P99029
8884	pp	Q9CQZ5 (pp) Q9CPQ8
8885	pp	Q9CQZ5 (pp) Q9CQC7
8886	pp	Q9CQZ5 (pp) Q3UIU2
8887	pp	Q9CQZ5 (pp) Q9CQQ7
8888	pp	Q9CQZ5 (pp) Q62425
8889	pp	Q9CQZ5 (pp) Q9CR68
8890	pp	Q9CQZ5 (pp) Q9CZ13
8891	pp	Q9CQZ5 (pp) Q9DC69
8892	pp	Q9CQZ5 (pp) Q9D0S9
8893	pp	Q9CQZ5 (pp) Q99LC3
8894	pp	Q9CQZ5 (pp) Q9D6J5
8895	pp	Q9CQZ5 (pp) Q9DCS9
8896	pp	Q9CQZ5 (pp) Q06185
8897	pp	Q9CQZ5 (pp) Q9DCX2
8898	pp	Q9CQZ5 (pp) Q9DB20
8899	pp	Q9CQZ5 (pp) Q9CQ54
8900	pp	Q9CQZ5 (pp) Q9D3D9
8901	pp	Q9CQZ5 (pp) Q9ERS2
8902	pp	Q9CQZ5 (pp) Q9WUM5
8903	pp	Q9CQZ5 (pp) Q9DCJ5
8904	pp	Q9CQZ5 (pp) Q8K3J1
8905	pp	Q9CQZ5 (pp) Q9D0M3
8906	pp	Q9CQZ5 (pp) Q99LX0
8907	pp	Q9CQZ5 (pp) Q9CQH3
8908	pp	Q9CQZ5 (pp) Q9DB77
8909	pp	Q9CQZ5 (pp) Q9Z1P6
8910	pp	Q9D6J6 (pp) Q01097
8911	pp	O08749 (pp) Q9D051
8912	pp	O08749 (pp) P97807
8913	pp	O08749 (pp) Q91YT0
8914	pp	O08749 (pp) Q03265
8915	pp	O08749 (pp) Q99LC5
8916	pp	O08749 (pp) Q6PB66
8917	pp	O08749 (pp) Q60931
8918	pp	O08749 (pp) Q99KI0
8919	pp	O08749 (pp) Q9Z2I9
8920	pp	O08749 (pp) Q9WUM5
8921	pp	O08749 (pp) Q60597
8922	pp	O08749 (pp) Q9D6J6
8923	pp	O08749 (pp) Q8BKZ9
8924	pp	O08749 (pp) Q8BMF4
8925	pp	O08749 (pp) P63038
8926	pp	O08749 (pp) P99029
8927	pp	O08749 (pp) O88441
8928	pp	O08749 (pp) Q91VD9
8929	pp	O08749 (pp) Q9CQH3
8930	pp	O08749 (pp) P09671
8931	pp	O08749 (pp) Q91VR2
8932	pp	O08749 (pp) Q8K2B3
8933	pp	O08749 (pp) Q9CZU6
8934	pp	O08749 (pp) Q9CQA3
8935	pp	O08749 (pp) P52480
8936	pp	O08749 (pp) Q9DB77
8937	pp	O08749 (pp) P08249
8938	pp	O08749 (pp) Q9D2G2
8939	pp	O08749 (pp) Q9D6R2
8940	pp	O08749 (pp) P35486
8941	pp	O08749 (pp) Q91ZJ5
8942	pp	O08749 (pp) Q9DC69
8943	pp	O08749 (pp) P56480
8944	pp	Q9D051 (pp) Q03265
8945	pp	Q9D051 (pp) Q91VD9
8946	pp	Q9D051 (pp) Q8BMF4
8947	pp	Q9D051 (pp) Q9DB77
8948	pp	Q9D051 (pp) P63101
8949	pp	Q9D051 (pp) Q9CQQ7
8950	pp	Q9D051 (pp) P52480
8951	pp	Q9D051 (pp) Q9D6R2
8952	pp	Q9D051 (pp) P40142
8953	pp	Q9D051 (pp) P16054
8954	pp	Q9D051 (pp) P06151
8955	pp	Q9D051 (pp) P97450
8956	pp	Q9D051 (pp) Q8BMF3
8957	pp	Q9D051 (pp) P97807
8958	pp	Q9D051 (pp) Q9CQH3
8959	pp	Q9D051 (pp) Q9D0M3
8960	pp	Q9D051 (pp) Q9D2G2
8961	pp	Q9D051 (pp) Q9CR68
8962	pp	Q9D051 (pp) Q05920
8963	pp	Q9D051 (pp) Q9DCJ5
8964	pp	Q9D051 (pp) Q99LC5
8965	pp	Q9D051 (pp) P35486
8966	pp	Q9D051 (pp) Q93092
8967	pp	Q9D051 (pp) P06745
8968	pp	Q9D3D9 (pp) O09111
8969	pp	Q9D3D9 (pp) Q9ERS2
8970	pp	Q9D3D9 (pp) Q9CQH3
8971	pp	Q9D3D9 (pp) Q91VR2
8972	pp	Q9D3D9 (pp) Q99LY9
8973	pp	Q9D3D9 (pp) Q9D6J6
8974	pp	O09111 (pp) Q9CQH3
8975	pp	O09111 (pp) Q9D6J6
8976	pp	Q03265 (pp) P68510
8977	pp	Q03265 (pp) Q91VM9
8978	pp	Q03265 (pp) Q9DC69
8979	pp	Q03265 (pp) Q9CR68
8980	pp	Q03265 (pp) Q9DCX2
8981	pp	Q03265 (pp) Q91VD9
8982	pp	Q03265 (pp) Q9CZ13
8983	pp	Q03265 (pp) P97807
8984	pp	Q03265 (pp) P16054
8985	pp	Q03265 (pp) P09411
8986	pp	Q03265 (pp) Q8K3J1
8987	pp	Q03265 (pp) Q99LC5
8988	pp	Q03265 (pp) Q9R0Y5
8989	pp	Q03265 (pp) Q91VR2
8990	pp	Q03265 (pp) Q91YT0
8991	pp	Q03265 (pp) Q9WUM5
8992	pp	Q03265 (pp) Q06185
8993	pp	Q03265 (pp) Q9DB77
8994	pp	Q03265 (pp) P63038
8995	pp	Q03265 (pp) Q60931
8996	pp	Q03265 (pp) Q8VEM8
8997	pp	Q03265 (pp) Q9D2G2
8998	pp	Q03265 (pp) Q9D3D9
8999	pp	Q03265 (pp) P48962
9000	pp	Q03265 (pp) P19536
9001	pp	Q03265 (pp) P03930
9002	pp	Q03265 (pp) Q9CQQ7
9003	pp	Q03265 (pp) O35143
9004	pp	Q03265 (pp) Q9D6J6
9005	pp	Q03265 (pp) Q9CQH3
9006	pp	Q03265 (pp) P43024
9007	pp	P68510 (pp) P05202
9008	pp	P68510 (pp) P17751
9009	pp	P68510 (pp) Q99PT1
9010	pp	P68510 (pp) P68368
9011	pp	P68510 (pp) Q9D8B3
9012	pp	P68510 (pp) Q9CQ92
9013	pp	P68510 (pp) Q91VZ6
9014	pp	P68510 (pp) Q8VBV7
9015	pp	P68510 (pp) P08249
9016	pp	P68510 (pp) Q61553
9017	pp	P68510 (pp) P67871
9018	pp	P68510 (pp) O55042
9019	pp	P68510 (pp) P10637
9020	pp	P68510 (pp) P61164
9021	pp	P68510 (pp) Q9R0Q6
9022	pp	P68510 (pp) P63101
9023	pp	P68510 (pp) P48036
9024	pp	P68510 (pp) P50518
9025	pp	P68510 (pp) P12787
9026	pp	P68510 (pp) Q9CWS0
9027	pp	P68510 (pp) Q68FD5
9028	pp	P68510 (pp) P54071
9029	pp	P68510 (pp) Q9ERS2
9030	pp	P68510 (pp) P42208
9031	pp	P68510 (pp) P46460
9032	pp	P68510 (pp) Q60930
9033	pp	P68510 (pp) Q9DCW4
9034	pp	P68510 (pp) Q9WV55
9035	pp	P68510 (pp) P11499
9036	pp	P68510 (pp) Q9D051
9037	pp	P68510 (pp) P56480
9038	pp	P68510 (pp) Q9CQW1
9039	pp	P68510 (pp) Q9DCJ5
9040	pp	P68510 (pp) P62259
9041	pp	P12382 (pp) P35438
9042	pp	P12382 (pp) P17710
9043	pp	P12382 (pp) P05063
9044	pp	P12382 (pp) P05064
9045	pp	P12382 (pp) Q93092
9046	pp	P12382 (pp) P63101
9047	pp	P12382 (pp) P06745
9048	pp	P12382 (pp) P52480
9049	pp	P12382 (pp) P47857
9050	pp	P12382 (pp) P17751
9051	pp	P35438 (pp) P28652
9052	pp	P35438 (pp) Q6PIC6
9053	pp	P35438 (pp) Q60631
9054	pp	P35438 (pp) P68033
9055	pp	P35438 (pp) P06837
9056	pp	P35438 (pp) P68368
9057	pp	P35438 (pp) P62259
9058	pp	P35438 (pp) O55100
9059	pp	P35438 (pp) P57780
9060	pp	P35438 (pp) Q8BMF4
9061	pp	P35438 (pp) Q6URW6
9062	pp	P35438 (pp) O88737
9063	pp	P35438 (pp) A2CG49
9064	pp	P35438 (pp) P63017
9065	pp	P35438 (pp) P12367
9066	pp	P35438 (pp) O35526
9067	pp	P35438 (pp) F6SEU4
9068	pp	P35438 (pp) P11627
9069	pp	P05202 (pp) P54071
9070	pp	P05202 (pp) Q9D6R2
9071	pp	P05202 (pp) Q60597
9072	pp	P05202 (pp) Q05920
9073	pp	P05202 (pp) Q8BH04
9074	pp	P05202 (pp) P06151
9075	pp	P05202 (pp) P70404
9076	pp	Q9QUI0 (pp) Q06335
9077	pp	Q9QUI0 (pp) Q99PT1
9078	pp	Q9QUI0 (pp) P30999
9079	pp	Q9QUI0 (pp) P63001
9080	pp	Q9QUI0 (pp) O88643
9081	pp	Q06335 (pp) Q9QXJ1
9082	pp	Q06335 (pp) P63330
9083	pp	Q06335 (pp) P04925
9084	pp	Q06335 (pp) P12023
9085	pp	Q06335 (pp) P63001
9086	pp	Q06335 (pp) Q03157
9087	pp	P23819 (pp) P35436
9088	pp	P23819 (pp) P68369
9089	pp	P23819 (pp) P99024
9090	pp	P23819 (pp) O08599
9091	pp	P23819 (pp) P38647
9092	pp	P23819 (pp) P16330
9093	pp	P35436 (pp) P35438
9094	pp	Q9CZU6 (pp) Q9DCD0
9095	pp	Q9CZU6 (pp) Q91VD9
9096	pp	Q9CZU6 (pp) P05202
9097	pp	Q9CZU6 (pp) Q8BKZ9
9098	pp	Q9CZU6 (pp) Q8BMF3
9099	pp	Q9CZU6 (pp) P26443
9100	pp	Q9CZU6 (pp) P08249
9101	pp	Q9CZU6 (pp) Q91VR2
9102	pp	Q9CZU6 (pp) P97807
9103	pp	Q9CZU6 (pp) P06151
9104	pp	Q9CZU6 (pp) Q8K2B3
9105	pp	Q9CZU6 (pp) Q99KI0
9106	pp	Q9CZU6 (pp) Q8BWT1
9107	pp	Q9CZU6 (pp) Q91WD5
9108	pp	Q9CZU6 (pp) Q91YT0
9109	pp	Q9CZU6 (pp) Q03265
9110	pp	Q9CZU6 (pp) P52480
9111	pp	Q9CZU6 (pp) P09671
9112	pp	Q9CZU6 (pp) Q9D0M3
9113	pp	Q9CZU6 (pp) Q9CQA3
9114	pp	Q9CZU6 (pp) Q99JY0
9115	pp	Q9CZU6 (pp) Q8BMF4
9116	pp	Q9CZU6 (pp) Q8BH04
9117	pp	Q9CZU6 (pp) P35486
9118	pp	Q9CZU6 (pp) Q8BGH2
9119	pp	Q9CZU6 (pp) Q60597
9120	pp	Q9CZU6 (pp) Q9DB20
9121	pp	Q9CZU6 (pp) Q9D6R2
9122	pp	Q9CZU6 (pp) P70404
9123	pp	Q9CZU6 (pp) Q9WUM5
9124	pp	Q9CZU6 (pp) Q8QZT1
9125	pp	Q9CZU6 (pp) P56480
9126	pp	Q9CZU6 (pp) Q9D2G2
9127	pp	Q9CZU6 (pp) Q05920
9128	pp	Q9CZU6 (pp) Q9D6J6
9129	pp	Q9CZU6 (pp) Q9CZ13
9130	pp	Q9CZU6 (pp) Q9CR68
9131	pp	Q9CZU6 (pp) P19096
9132	pp	Q9DCD0 (pp) Q9D0F9
9133	pp	Q9DCD0 (pp) Q8BMS1
9134	pp	Q9DCD0 (pp) Q91ZJ5
9135	pp	Q9DCD0 (pp) P06151
9136	pp	Q9DCD0 (pp) Q8CAQ8
9137	pp	P51863 (pp) Q9Z1G3
9138	pp	P51863 (pp) P63082
9139	pp	P51863 (pp) Q8BVE3
9140	pp	P51863 (pp) P50516
9141	pp	P51863 (pp) P57746
9142	pp	P51863 (pp) Q9Z1G4
9143	pp	P51863 (pp) Q9EPJ9
9144	pp	P51863 (pp) P50518
9145	pp	P51863 (pp) Q9WTT4
9146	pp	Q9Z1G3 (pp) P62331
9147	pp	Q9Z1G3 (pp) Q9WTT4
9148	pp	Q9Z1G3 (pp) Q9Z1G4
9149	pp	Q9Z1G3 (pp) P50516
9150	pp	Q9Z1G3 (pp) Q91VM9
9151	pp	Q9Z1G3 (pp) Q8BVE3
9152	pp	Q9Z1G3 (pp) P63082
9153	pp	Q9Z1G3 (pp) P23506
9154	pp	P62259 (pp) P47757
9155	pp	P62259 (pp) P46660
9156	pp	P62259 (pp) Q9JLM8
9157	pp	P62259 (pp) O88935
9158	pp	P62259 (pp) P10637
9159	pp	P62259 (pp) P63101
9160	pp	P62259 (pp) Q9QWI6
9161	pp	P62259 (pp) P16858
9162	pp	P62259 (pp) Q9DC28
9163	pp	P62259 (pp) Q03265
9164	pp	P62259 (pp) P30999
9165	pp	P62259 (pp) Q61316
9166	pp	P62259 (pp) Q68FF6
9167	pp	P62259 (pp) Q3UTJ2
9168	pp	P62259 (pp) Q812A2
9169	pp	P47757 (pp) O89053
9170	pp	Q8C8R3 (pp) P16546
9171	pp	Q8C8R3 (pp) P11627
9172	pp	P16546 (pp) Q9CQV8
9173	pp	P16546 (pp) O08788
9174	pp	P63330 (pp) Q76MZ3
9175	pp	P63330 (pp) Q60996
9176	pp	P63330 (pp) Q61151
9177	pp	P63330 (pp) P35438
9178	pp	P63330 (pp) Q6P1F6
9179	pp	Q76MZ3 (pp) Q6P1F6
9180	pp	Q76MZ3 (pp) O08788
9181	pp	Q76MZ3 (pp) P63101
9182	pp	Q76MZ3 (pp) P35438
9183	pp	Q76MZ3 (pp) Q99KJ8
9184	pp	Q76MZ3 (pp) Q60996
9185	pp	Q76MZ3 (pp) P50396
9186	pp	Q76MZ3 (pp) P62259
9187	pp	Q76MZ3 (pp) P61982
9188	pp	Q76MZ3 (pp) P18052
9189	pp	Q76MZ3 (pp) Q61151
9190	pp	Q76MZ3 (pp) Q9DC28
9191	pp	Q9CQZ6 (pp) Q9CQ54
9192	pp	Q9CQZ6 (pp) Q99LC3
9193	pp	Q9CQZ6 (pp) Q3UIU2
9194	pp	Q9CQZ6 (pp) Q9CQH3
9195	pp	Q9CQZ6 (pp) Q9CR68
9196	pp	Q9CQZ6 (pp) Q9DCS9
9197	pp	Q9CQZ6 (pp) Q06185
9198	pp	Q9CQZ6 (pp) Q9D6J6
9199	pp	Q9CQZ6 (pp) Q9WUM5
9200	pp	Q9CQZ6 (pp) Q62425
9201	pp	Q9CQZ6 (pp) Q9ERS2
9202	pp	Q9CQZ6 (pp) Q8K3J1
9203	pp	Q9CQZ6 (pp) Q91YT0
9204	pp	Q9CQZ6 (pp) Q91VR2
9205	pp	Q9CQZ6 (pp) Q99LY9
9206	pp	Q9CQZ6 (pp) Q9DCX2
9207	pp	Q9CQZ6 (pp) Q9DB77
9208	pp	Q9CQZ6 (pp) P56391
9209	pp	Q9CQZ6 (pp) Q9DC69
9210	pp	Q9CQZ6 (pp) Q9Z1P6
9211	pp	Q9CQZ6 (pp) Q9CPQ8
9212	pp	Q9CQZ6 (pp) Q99LC5
9213	pp	Q9CQZ6 (pp) Q9DCJ5
9214	pp	Q9CQZ6 (pp) P48771
9215	pp	Q9CQZ6 (pp) Q9CQQ7
9216	pp	Q9CQZ6 (pp) Q99LX0
9217	pp	Q9CQZ6 (pp) Q9CQ69
9218	pp	Q9CQ54 (pp) Q91YT0
9219	pp	Q9CQ54 (pp) O09111
9220	pp	Q9CQ54 (pp) Q9DC69
9221	pp	Q9CQ54 (pp) Q9CQQ7
9222	pp	Q9CQ54 (pp) Q9DCJ5
9223	pp	Q9CQ54 (pp) Q06185
9224	pp	Q9CQ54 (pp) Q8K3J1
9225	pp	Q9CQ54 (pp) Q9CQ69
9226	pp	Q9CQ54 (pp) Q9D6J6
9227	pp	Q9CQ54 (pp) Q9DCS9
9228	pp	Q9CQ54 (pp) Q99LY9
9229	pp	Q9CQ54 (pp) Q9CQH3
9230	pp	Q9CQ54 (pp) Q9Z1P6
9231	pp	Q9CQ54 (pp) Q3UIU2
9232	pp	Q9DCT2 (pp) Q9CQ69
9233	pp	Q9DCT2 (pp) P19783
9234	pp	Q9DCT2 (pp) Q99LC3
9235	pp	Q9DCT2 (pp) O70325
9236	pp	Q9DCT2 (pp) Q9CQA3
9237	pp	Q9DCT2 (pp) Q8K1Z0
9238	pp	Q9DCT2 (pp) P19536
9239	pp	Q9DCT2 (pp) Q9DC70
9240	pp	Q9DCT2 (pp) Q3UIU2
9241	pp	Q9DCT2 (pp) Q9DB77
9242	pp	Q9DCT2 (pp) Q9CQQ7
9243	pp	Q9DCT2 (pp) Q9D6J6
9244	pp	Q9DCT2 (pp) Q9DCS9
9245	pp	Q9DCT2 (pp) Q9D3D9
9246	pp	Q9DCT2 (pp) P48771
9247	pp	Q9DCT2 (pp) P17751
9248	pp	Q9DCT2 (pp) Q8K3J1
9249	pp	Q9DCT2 (pp) Q91WD5
9250	pp	Q9DCT2 (pp) Q9D6J5
9251	pp	Q9DCT2 (pp) P56391
9252	pp	Q9DCT2 (pp) Q9ERS2
9253	pp	Q9DCT2 (pp) Q03265
9254	pp	Q9DCT2 (pp) Q8BGH2
9255	pp	Q9DCT2 (pp) Q9CQC7
9256	pp	Q9DCT2 (pp) Q9WUM5
9257	pp	Q9DCT2 (pp) Q9CQJ8
9258	pp	Q9DCT2 (pp) Q9CXZ1
9259	pp	Q9DCT2 (pp) Q99LC5
9260	pp	Q9DCT2 (pp) Q99LY9
9261	pp	Q9DCT2 (pp) Q7TMF3
9262	pp	Q9DCT2 (pp) Q9CR68
9263	pp	Q9DCT2 (pp) P42125
9264	pp	Q9DCT2 (pp) Q9CQZ6
9265	pp	Q9DCT2 (pp) P99029
9266	pp	Q9DCT2 (pp) Q9D051
9267	pp	Q9DCT2 (pp) Q9DC69
9268	pp	Q9DCT2 (pp) Q9D855
9269	pp	Q9DCT2 (pp) Q9DCX2
9270	pp	Q9DCT2 (pp) Q9CQR4
9271	pp	Q9DCT2 (pp) Q9DCJ5
9272	pp	Q9DCT2 (pp) P09671
9273	pp	Q9DCT2 (pp) P56480
9274	pp	Q9DCT2 (pp) Q8K2B3
9275	pp	Q9DCT2 (pp) Q9CQ75
9276	pp	Q9DCT2 (pp) P52503
9277	pp	Q9DCT2 (pp) Q91VD9
9278	pp	Q9DCT2 (pp) Q8BH95
9279	pp	Q9DCT2 (pp) Q91YT0
9280	pp	Q9DCT2 (pp) P56379
9281	pp	Q9DCT2 (pp) Q9CZ13
9282	pp	Q9DCT2 (pp) Q9DB20
9283	pp	Q9DCT2 (pp) Q8VEM8
9284	pp	Q9DCT2 (pp) Q9CPP6
9285	pp	Q9DCT2 (pp) Q9CQ54
9286	pp	Q9DCT2 (pp) Q9D0M3
9287	pp	Q9DCT2 (pp) Q99KI0
9288	pp	Q9DCT2 (pp) Q91VR2
9289	pp	Q9DCT2 (pp) O88441
9290	pp	Q9DCT2 (pp) Q9CQH3
9291	pp	Q9DCT2 (pp) Q62425
9292	pp	Q9DCT2 (pp) O09111
9293	pp	Q9DCT2 (pp) P68510
9294	pp	Q9DCT2 (pp) P62073
9295	pp	Q9DCT2 (pp) P08249
9296	pp	Q9DCT2 (pp) Q9CPQ1
9297	pp	Q9DCT2 (pp) Q9D0S9
9298	pp	Q9DCT2 (pp) P50516
9299	pp	Q9DCT2 (pp) P97807
9300	pp	Q9DCT2 (pp) Q9Z1P6
9301	pp	Q9DCT2 (pp) Q9CR62
9302	pp	Q9DCT2 (pp) Q9CZU6
9303	pp	Q9DCT2 (pp) Q80Y14
9304	pp	Q9DCT2 (pp) Q9CQZ5
9305	pp	Q9DCT2 (pp) P70404
9306	pp	Q9DCT2 (pp) Q06185
9307	pp	Q9DCT2 (pp) Q99LX0
9308	pp	Q9DCT2 (pp) P97450
9309	pp	Q9CQ69 (pp) P56391
9310	pp	Q9CQ69 (pp) Q8K3J1
9311	pp	Q9CQ69 (pp) Q99LY9
9312	pp	Q9CQ69 (pp) Q9D6J6
9313	pp	Q9CQ69 (pp) Q9DCJ5
9314	pp	Q9CQ69 (pp) Q9CQH3
9315	pp	Q9CQ69 (pp) Q9DC69
9316	pp	Q9CQ69 (pp) Q9ERS2
9317	pp	Q9CQ69 (pp) Q9D3D9
9318	pp	Q9CQ69 (pp) P00405
9319	pp	Q9CQ69 (pp) Q91VR2
9320	pp	Q9CQ69 (pp) Q3UIU2
9321	pp	Q9CQ69 (pp) P17665
9322	pp	Q9CQ69 (pp) O09111
9323	pp	Q9CQ69 (pp) Q9CQQ7
9324	pp	Q9CQ69 (pp) Q99LX0
9325	pp	P08249 (pp) Q9D6R2
9326	pp	P08249 (pp) Q06185
9327	pp	P08249 (pp) Q91VR2
9328	pp	P08249 (pp) P70404
9329	pp	P08249 (pp) O35658
9330	pp	P08249 (pp) P17751
9331	pp	P08249 (pp) Q9DCD0
9332	pp	P08249 (pp) P56480
9333	pp	P08249 (pp) Q9D3D9
9334	pp	P08249 (pp) P97807
9335	pp	P08249 (pp) Q64521
9336	pp	P08249 (pp) Q60931
9337	pp	P08249 (pp) Q8BGH2
9338	pp	P08249 (pp) Q9D051
9339	pp	P08249 (pp) Q9D855
9340	pp	P08249 (pp) Q8K2B3
9341	pp	P08249 (pp) P05202
9342	pp	P08249 (pp) Q9DC70
9343	pp	P08249 (pp) Q8BH04
9344	pp	P08249 (pp) P63038
9345	pp	P08249 (pp) Q9D6J6
9346	pp	P08249 (pp) Q9CQC7
9347	pp	P08249 (pp) Q9CR68
9348	pp	P08249 (pp) Q9DB77
9349	pp	P08249 (pp) P09411
9350	pp	P08249 (pp) Q9DC69
9351	pp	P08249 (pp) Q8K3J1
9352	pp	P08249 (pp) Q8BMF3
9353	pp	P08249 (pp) Q8BMF4
9354	pp	P08249 (pp) Q9CQJ8
9355	pp	P08249 (pp) Q8VEM8
9356	pp	P08249 (pp) Q99KI0
9357	pp	P08249 (pp) O09111
9358	pp	P08249 (pp) Q99LX0
9359	pp	P08249 (pp) Q9DCX2
9360	pp	P08249 (pp) Q05920
9361	pp	P08249 (pp) Q91YT0
9362	pp	P08249 (pp) Q9Z2I9
9363	pp	P08249 (pp) P19783
9364	pp	P08249 (pp) Q91VD9
9365	pp	P08249 (pp) Q9DB20
9366	pp	P08249 (pp) P54071
9367	pp	P08249 (pp) P52480
9368	pp	P08249 (pp) Q9D2G2
9369	pp	P08249 (pp) Q9DCJ5
9370	pp	P08249 (pp) P97450
9371	pp	P08249 (pp) Q9WUM5
9372	pp	P08249 (pp) P26443
9373	pp	P08249 (pp) Q9CQZ5
9374	pp	P08249 (pp) Q9CZ13
9375	pp	P08249 (pp) Q9D0M3
9376	pp	P08249 (pp) P06745
9377	pp	P08249 (pp) P48962
9378	pp	P08249 (pp) Q03265
9379	pp	P08249 (pp) Q9CQH3
9380	pp	P08249 (pp) Q9CQQ7
9381	pp	P08249 (pp) Q9DCS9
9382	pp	Q9D6R2 (pp) P70404
9383	pp	Q9D6R2 (pp) P16054
9384	pp	Q9D6R2 (pp) Q8BWF0
9385	pp	Q9D6R2 (pp) Q91VR2
9386	pp	Q9D6R2 (pp) Q8K3J1
9387	pp	Q9D6R2 (pp) Q60597
9388	pp	Q9D6R2 (pp) P54071
9389	pp	Q9D6R2 (pp) Q9D2G2
9390	pp	Q9D6R2 (pp) Q9WUM5
9391	pp	P54071 (pp) P06151
9392	pp	P54071 (pp) Q60597
9393	pp	P54071 (pp) P70404
9394	pp	Q9DB20 (pp) Q9CQH3
9395	pp	Q9DB20 (pp) P67778
9396	pp	Q9DB20 (pp) Q9DCX2
9397	pp	Q9DB20 (pp) O09111
9398	pp	Q9DB20 (pp) Q9D6J5
9399	pp	Q9DB20 (pp) Q99LX0
9400	pp	Q9DB20 (pp) Q9DCJ5
9401	pp	Q9DB20 (pp) Q9CPP6
9402	pp	Q9DB20 (pp) P99029
9403	pp	Q9DB20 (pp) Q9CQ69
9404	pp	Q9DB20 (pp) Q9CR68
9405	pp	Q9DB20 (pp) P97807
9406	pp	Q9DB20 (pp) Q9CZ13
9407	pp	Q9DB20 (pp) Q9D6J6
9408	pp	Q9DB20 (pp) P19783
9409	pp	Q9DB20 (pp) P56391
9410	pp	Q9DB20 (pp) Q3UIU2
9411	pp	Q9DB20 (pp) Q9DC69
9412	pp	Q9DB20 (pp) Q9CQQ7
9413	pp	Q9DB20 (pp) P62073
9414	pp	Q9DB20 (pp) Q9ERS2
9415	pp	Q9DB20 (pp) Q9D3D9
9416	pp	Q9DB20 (pp) Q91YT0
9417	pp	Q9DB20 (pp) Q9WUM5
9418	pp	Q9DB20 (pp) P17751
9419	pp	Q9DB20 (pp) Q78IK2
9420	pp	Q9DB20 (pp) Q8K3J1
9421	pp	Q9DB20 (pp) Q06185
9422	pp	Q9DB20 (pp) Q91VM9
9423	pp	Q9DB20 (pp) Q9DCS9
9424	pp	Q9DB20 (pp) P43024
9425	pp	Q9DB20 (pp) P56480
9426	pp	Q9DB20 (pp) Q03265
9427	pp	Q9DB20 (pp) Q9Z1P6
9428	pp	Q9DB20 (pp) Q9CPQ8
9429	pp	Q9DB20 (pp) Q91VR2
9430	pp	Q9DB20 (pp) Q9DB77
9431	pp	Q9CQH3 (pp) Q9D6J6
9432	pp	Q3UHD9 (pp) Q9Z2H5
9433	pp	Q9Z2H5 (pp) Q99N28
9434	pp	Q6P9K8 (pp) O88952
9435	pp	Q6P9K8 (pp) O70589
9436	pp	O88952 (pp) P60469
9437	pp	O88952 (pp) O70589
9438	pp	P19783 (pp) Q9CQH3
9439	pp	P19783 (pp) Q9CQ69
9440	pp	P19783 (pp) Q9CR68
9441	pp	P19783 (pp) P19536
9442	pp	P19783 (pp) Q9D3D9
9443	pp	P19783 (pp) Q91YT0
9444	pp	P19783 (pp) Q06185
9445	pp	P19783 (pp) Q91VR2
9446	pp	P19783 (pp) Q9ERS2
9447	pp	P19783 (pp) P17665
9448	pp	P19783 (pp) Q9DCX2
9449	pp	P19783 (pp) Q99LX0
9450	pp	P19783 (pp) Q9CQQ7
9451	pp	P19783 (pp) P56391
9452	pp	P19783 (pp) P43024
9453	pp	P19783 (pp) P00405
9454	pp	P19783 (pp) Q9DCJ5
9455	pp	P19783 (pp) P48771
9456	pp	P19783 (pp) Q9DC69
9457	pp	Q8BK64 (pp) P63038
9458	pp	Q8BK64 (pp) Q60864
9459	pp	Q8BK64 (pp) P07901
9460	pp	Q8BK64 (pp) Q61699
9461	pp	Q8BK64 (pp) P11499
9462	pp	P63038 (pp) P52196
9463	pp	P63038 (pp) P09411
9464	pp	P63038 (pp) Q99LC5
9465	pp	P63038 (pp) P52480
9466	pp	P63038 (pp) P15105
9467	pp	P63038 (pp) Q9WUM5
9468	pp	P63038 (pp) Q9Z0X1
9469	pp	P63038 (pp) Q6PB66
9470	pp	P63038 (pp) Q8BIJ6
9471	pp	P63038 (pp) P63037
9472	pp	P63038 (pp) Q925I1
9473	pp	P63038 (pp) Q8CGK3
9474	pp	P63038 (pp) Q921G7
9475	pp	P63038 (pp) Q91VR2
9476	pp	P63038 (pp) Q61699
9477	pp	P63038 (pp) P17156
9478	pp	P63038 (pp) O35658
9479	pp	P63038 (pp) P67778
9480	pp	P63038 (pp) P97807
9481	pp	Q8BH95 (pp) Q9CZ13
9482	pp	Q8BH95 (pp) Q8BWT1
9483	pp	Q8BH95 (pp) Q8QZT1
9484	pp	Q8BH95 (pp) P51174
9485	pp	Q8BH95 (pp) P50544
9486	pp	Q8BH95 (pp) Q9JHI5
9487	pp	Q8BH95 (pp) Q8BMS1
9488	pp	Q8BH95 (pp) Q99MN9
9489	pp	Q8BH95 (pp) O08756
9490	pp	Q8BH95 (pp) Q61425
9491	pp	Q8BH95 (pp) Q99JY0
9492	pp	Q8BH95 (pp) Q99MR8
9493	pp	Q8BH95 (pp) Q9DCJ5
9494	pp	Q8BH95 (pp) Q9WUM5
9495	pp	Q8BH95 (pp) Q9CQ62
9496	pp	Q8BH95 (pp) Q99LC5
9497	pp	Q8BH95 (pp) Q9DC69
9498	pp	Q8BH95 (pp) Q9DBL1
9499	pp	Q9CZ13 (pp) Q9ERS2
9500	pp	Q9CZ13 (pp) Q9DCS9
9501	pp	Q9CZ13 (pp) P97807
9502	pp	Q9CZ13 (pp) P67778
9503	pp	Q9CZ13 (pp) Q91VD9
9504	pp	Q9CZ13 (pp) Q9D3D9
9505	pp	Q9CZ13 (pp) Q91YT0
9506	pp	Q9CZ13 (pp) O09111
9507	pp	Q9CZ13 (pp) Q8K1Z0
9508	pp	Q9CZ13 (pp) Q60597
9509	pp	Q9CZ13 (pp) Q9CQ69
9510	pp	Q9CZ13 (pp) Q9DCJ5
9511	pp	Q9CZ13 (pp) Q9Z1P6
9512	pp	Q9CZ13 (pp) Q9WUM5
9513	pp	Q9CZ13 (pp) P19783
9514	pp	Q9CZ13 (pp) Q9D6J6
9515	pp	Q9CZ13 (pp) Q91VR2
9516	pp	Q9CZ13 (pp) Q8K3J1
9517	pp	Q9CZ13 (pp) Q9CQH3
9518	pp	Q9CZ13 (pp) Q99P72
9519	pp	Q9CZ13 (pp) Q9DC69
9520	pp	Q9CZ13 (pp) Q9DB77
9521	pp	Q9CZ13 (pp) Q9CR68
9522	pp	Q9CZ13 (pp) Q99LY9
9523	pp	Q9D0M3 (pp) Q9DB20
9524	pp	Q9D0M3 (pp) P62897
9525	pp	Q9D0M3 (pp) P70404
9526	pp	Q9D0M3 (pp) O09111
9527	pp	Q9D0M3 (pp) P97807
9528	pp	Q9D0M3 (pp) Q9D3D9
9529	pp	Q9D0M3 (pp) Q9ERS2
9530	pp	Q9D0M3 (pp) Q9CQZ6
9531	pp	Q9D0M3 (pp) Q9CQ69
9532	pp	Q9D0M3 (pp) P97450
9533	pp	Q9D0M3 (pp) Q06185
9534	pp	Q9D0M3 (pp) Q9WUM5
9535	pp	Q9D0M3 (pp) Q91VD9
9536	pp	Q9D0M3 (pp) P17751
9537	pp	Q9D0M3 (pp) Q9DB77
9538	pp	Q9D0M3 (pp) P19536
9539	pp	Q9D0M3 (pp) Q91VR2
9540	pp	Q9D0M3 (pp) P50516
9541	pp	Q9D0M3 (pp) Q9DCX2
9542	pp	Q9D0M3 (pp) Q9CR68
9543	pp	Q9D0M3 (pp) Q91YT0
9544	pp	Q9D0M3 (pp) Q9D6J6
9545	pp	Q9D0M3 (pp) P62073
9546	pp	Q9D0M3 (pp) Q8K3J1
9547	pp	Q9D0M3 (pp) Q64521
9548	pp	Q9D0M3 (pp) P56391
9549	pp	Q9D0M3 (pp) Q8VEM8
9550	pp	Q9D0M3 (pp) P42125
9551	pp	Q9D0M3 (pp) Q99LC3
9552	pp	Q9D0M3 (pp) Q99LX0
9553	pp	Q9D0M3 (pp) P43024
9554	pp	Q9D0M3 (pp) Q9DC69
9555	pp	Q9D0M3 (pp) Q9CQQ7
9556	pp	Q9D0M3 (pp) Q9D2G2
9557	pp	Q9D0M3 (pp) Q9DCJ5
9558	pp	Q9D0M3 (pp) P48771
9559	pp	Q9D0M3 (pp) Q9CZ13
9560	pp	Q9D0M3 (pp) Q9CQH3
9561	pp	Q9D0M3 (pp) Q9Z1P6
9562	pp	Q9D0M3 (pp) P00405
9563	pp	Q9D0M3 (pp) P19783
9564	pp	Q9D0M3 (pp) Q9CPP6
9565	pp	Q9D0M3 (pp) Q03265
9566	pp	Q9D0M3 (pp) O35658
9567	pp	Q9D0M3 (pp) P56480
9568	pp	Q99LC3 (pp) Q99LY9
9569	pp	Q99LC3 (pp) Q9Z1P6
9570	pp	Q99LC3 (pp) Q9DCJ5
9571	pp	Q99LC3 (pp) P50516
9572	pp	Q99LC3 (pp) O09111
9573	pp	Q99LC3 (pp) Q9D6J6
9574	pp	Q99LC3 (pp) Q9CQH3
9575	pp	Q99LC3 (pp) Q9DB77
9576	pp	Q99LC3 (pp) Q91YT0
9577	pp	Q99LC3 (pp) Q9CQ54
9578	pp	Q99LC3 (pp) Q9DCS9
9579	pp	Q99LC3 (pp) Q9CQ69
9580	pp	Q99LC3 (pp) Q9DC69
9581	pp	Q99LC3 (pp) Q9D3D9
9582	pp	Q99LC3 (pp) Q8K3J1
9583	pp	Q99LY9 (pp) Q9ERS2
9584	pp	Q99LY9 (pp) Q9CQH3
9585	pp	Q99LY9 (pp) Q9D6J6
9586	pp	Q8BMF4 (pp) Q05920
9587	pp	Q8BMF4 (pp) Q8BWT1
9588	pp	Q8BMF4 (pp) Q9D2G2
9589	pp	Q8BMF4 (pp) P63101
9590	pp	Q8BMF4 (pp) Q9WUM5
9591	pp	Q8BMF4 (pp) Q99JY0
9592	pp	Q8BMF4 (pp) Q922H2
9593	pp	Q05920 (pp) P06151
9594	pp	Q05920 (pp) P15105
9595	pp	P63085 (pp) P35438
9596	pp	P63085 (pp) Q64010
9597	pp	P63085 (pp) P07901
9598	pp	P61027 (pp) Q61598
9599	pp	Q61598 (pp) Q91VR2
9600	pp	Q61598 (pp) P63011
9601	pp	Q61598 (pp) Q99PT1
9602	pp	Q61598 (pp) P62821
9603	pp	P56480 (pp) P17742
9604	pp	P56480 (pp) Q9D2G2
9605	pp	P56480 (pp) P63038
9606	pp	P56480 (pp) P50516
9607	pp	P56480 (pp) P09103
9608	pp	P56480 (pp) Q9D3D9
9609	pp	P56480 (pp) Q60864
9610	pp	P56480 (pp) P03930
9611	pp	P56480 (pp) Q06185
9612	pp	P56480 (pp) Q99LX0
9613	pp	P56480 (pp) Q9WUM5
9614	pp	P56480 (pp) P17156
9615	pp	P56480 (pp) Q9CZ13
9616	pp	P56480 (pp) P19783
9617	pp	P56480 (pp) P62259
9618	pp	P56480 (pp) P00405
9619	pp	P56480 (pp) P56391
9620	pp	P56480 (pp) P15105
9621	pp	P56480 (pp) O35143
9622	pp	P56480 (pp) Q99LC3
9623	pp	P56480 (pp) Q8K3J1
9624	pp	P56480 (pp) P17182
9625	pp	P56480 (pp) Q9DCX2
9626	pp	P56480 (pp) Q8VEM8
9627	pp	P56480 (pp) Q91VR2
9628	pp	P56480 (pp) P16054
9629	pp	P56480 (pp) Q91VD9
9630	pp	P56480 (pp) Q9D6J6
9631	pp	P56480 (pp) Q9CQQ7
9632	pp	P56480 (pp) Q91YT0
9633	pp	P56480 (pp) Q9CR68
9634	pp	P56480 (pp) P97807
9635	pp	P56480 (pp) Q03265
9636	pp	P68404 (pp) P35438
9637	pp	P68404 (pp) P26645
9638	pp	P67778 (pp) P50516
9639	pp	Q9JLJ2 (pp) Q91VR2
9640	pp	Q9JLJ2 (pp) Q9EQ20
9641	pp	Q9JLJ2 (pp) Q61425
9642	pp	Q9JLJ2 (pp) Q8CHT0
9643	pp	Q9JLJ2 (pp) Q8BW75
9644	pp	Q9JLJ2 (pp) P61922
9645	pp	Q91VR2 (pp) O09111
9646	pp	Q91VR2 (pp) Q9CQH3
9647	pp	Q91VR2 (pp) Q9D6J6
9648	pp	Q9CPQ8 (pp) Q9CQH3
9649	pp	Q9CPQ8 (pp) Q9D6J6
9650	pp	Q91VD9 (pp) Q9ERS2
9651	pp	Q91VD9 (pp) Q9DC69
9652	pp	Q91VD9 (pp) Q91YT0
9653	pp	Q91VD9 (pp) Q99LY9
9654	pp	Q91VD9 (pp) Q3UIU2
9655	pp	Q91VD9 (pp) Q99LC5
9656	pp	Q91VD9 (pp) Q8K3J1
9657	pp	Q91VD9 (pp) Q9Z1P6
9658	pp	Q91VD9 (pp) Q8BMF4
9659	pp	Q91VD9 (pp) Q9DCJ5
9660	pp	Q91VD9 (pp) Q9CQ54
9661	pp	Q91VD9 (pp) Q9CQQ7
9662	pp	Q91VD9 (pp) P97807
9663	pp	Q91VD9 (pp) Q9DB77
9664	pp	Q91VD9 (pp) Q99LC3
9665	pp	Q91VD9 (pp) Q6PB66
9666	pp	Q91VD9 (pp) Q9DCS9
9667	pp	Q91VD9 (pp) Q9WUM5
9668	pp	Q91VD9 (pp) Q9CR68
9669	pp	Q91VD9 (pp) Q9CQH3
9670	pp	Q91VD9 (pp) Q91VR2
9671	pp	Q91VD9 (pp) Q9CQ69
9672	pp	Q91VD9 (pp) O09111
9673	pp	Q91VD9 (pp) Q9D2G2
9674	pp	Q91VD9 (pp) Q9CQZ6
9675	pp	Q91VD9 (pp) Q9D6J6
9676	pp	Q9DCS9 (pp) Q9CR68
9677	pp	Q9DCS9 (pp) Q9DC69
9678	pp	Q9DCS9 (pp) Q9CQQ7
9679	pp	Q9DCS9 (pp) Q06185
9680	pp	Q9DCS9 (pp) Q9CPQ8
9681	pp	Q9DCS9 (pp) Q9D3D9
9682	pp	Q9DCS9 (pp) Q9DCX2
9683	pp	Q9DCS9 (pp) Q9D6J6
9684	pp	Q9DCS9 (pp) Q9ERS2
9685	pp	Q9DCS9 (pp) Q9CQ69
9686	pp	Q9DCS9 (pp) Q8K3J1
9687	pp	Q9DCS9 (pp) Q9DCJ5
9688	pp	Q9DCS9 (pp) Q9CQH3
9689	pp	Q9DCS9 (pp) O09111
9690	pp	Q9CR68 (pp) P43024
9691	pp	Q9CR68 (pp) Q9D2G2
9692	pp	Q9CR68 (pp) Q06185
9693	pp	Q9CR68 (pp) Q9CQQ7
9694	pp	Q9CR68 (pp) Q8K3J1
9695	pp	Q9CR68 (pp) Q9DCJ5
9696	pp	Q9CR68 (pp) Q9WUM5
9697	pp	Q9CR68 (pp) Q9ERS2
9698	pp	Q9CR68 (pp) Q9D3D9
9699	pp	Q9CR68 (pp) P00405
9700	pp	Q9CR68 (pp) P56391
9701	pp	Q9CR68 (pp) Q9CQ69
9702	pp	Q9CR68 (pp) O88441
9703	pp	Q9CR68 (pp) P62897
9704	pp	Q9CR68 (pp) Q9D6J6
9705	pp	Q9CR68 (pp) Q9DC69
9706	pp	Q9CR68 (pp) O09111
9707	pp	Q9CR68 (pp) Q9DCX2
9708	pp	Q9CR68 (pp) Q8VEM8
9709	pp	Q9CR68 (pp) Q91VR2
9710	pp	Q9CR68 (pp) Q9CQH3
9711	pp	Q9CR68 (pp) O35658
9712	pp	P05132 (pp) P12367
9713	pp	P05132 (pp) P31324
9714	pp	P05132 (pp) P35438
9715	pp	Q9CQJ8 (pp) Q06185
9716	pp	Q9CQJ8 (pp) P19783
9717	pp	Q9CQJ8 (pp) Q9DB77
9718	pp	Q9CQJ8 (pp) Q9Z1P6
9719	pp	Q9CQJ8 (pp) Q9DC69
9720	pp	Q9CQJ8 (pp) O09111
9721	pp	Q9CQJ8 (pp) Q9DB20
9722	pp	Q9CQJ8 (pp) Q9CQ69
9723	pp	Q9CQJ8 (pp) Q9DCJ5
9724	pp	Q9CQJ8 (pp) P48771
9725	pp	Q9CQJ8 (pp) Q9D0M3
9726	pp	Q9CQJ8 (pp) Q9D6J6
9727	pp	Q9CQJ8 (pp) Q9CQ54
9728	pp	Q9CQJ8 (pp) P97450
9729	pp	Q9CQJ8 (pp) Q9CZ13
9730	pp	Q9CQJ8 (pp) P97807
9731	pp	Q9CQJ8 (pp) Q9D023
9732	pp	Q9CQJ8 (pp) Q9CQZ6
9733	pp	Q9CQJ8 (pp) Q9ERS2
9734	pp	Q9CQJ8 (pp) Q99KI0
9735	pp	Q9CQJ8 (pp) Q91YT0
9736	pp	Q9CQJ8 (pp) Q99LC3
9737	pp	Q9CQJ8 (pp) Q9CPP6
9738	pp	Q9CQJ8 (pp) Q9CPQ8
9739	pp	Q9CQJ8 (pp) P43024
9740	pp	Q9CQJ8 (pp) Q9CQC7
9741	pp	Q9CQJ8 (pp) Q8K1Z0
9742	pp	Q9CQJ8 (pp) Q9CQZ5
9743	pp	Q9CQJ8 (pp) Q99LC5
9744	pp	Q9CQJ8 (pp) Q8VEM8
9745	pp	Q9CQJ8 (pp) Q03265
9746	pp	Q9CQJ8 (pp) Q62425
9747	pp	Q9CQJ8 (pp) Q9CR68
9748	pp	Q9CQJ8 (pp) Q9CQH3
9749	pp	Q9CQJ8 (pp) Q99LY9
9750	pp	Q9CQJ8 (pp) Q8K3J1
9751	pp	Q9CQJ8 (pp) Q9DCX2
9752	pp	Q9CQJ8 (pp) Q91VR2
9753	pp	Q9CQJ8 (pp) Q9D6J5
9754	pp	Q9CQJ8 (pp) Q91VD9
9755	pp	Q9CQJ8 (pp) Q9D3D9
9756	pp	Q9CQJ8 (pp) P99029
9757	pp	Q9CQJ8 (pp) P62073
9758	pp	Q9CQJ8 (pp) Q9DCS9
9759	pp	Q9CQJ8 (pp) Q9CQQ7
9760	pp	Q06185 (pp) Q99LY9
9761	pp	Q06185 (pp) Q9D6J6
9762	pp	Q06185 (pp) Q9CQH3
9763	pp	Q06185 (pp) P56391
9764	pp	Q06185 (pp) Q9DCJ5
9765	pp	Q06185 (pp) Q9CQ69
9766	pp	Q06185 (pp) O09111
9767	pp	Q06185 (pp) Q8K3J1
9768	pp	Q06185 (pp) Q91VR2
9769	pp	Q06185 (pp) Q9D3D9
9770	pp	Q06185 (pp) Q9ERS2
9771	pp	Q06185 (pp) Q9CQQ7
9772	pp	Q06185 (pp) Q9DCX2
9773	pp	Q06185 (pp) P03930
9774	pp	Q9DC70 (pp) Q9D0S9
9775	pp	Q9DC70 (pp) Q03265
9776	pp	Q9DC70 (pp) Q9CQZ5
9777	pp	Q9DC70 (pp) Q8K2B3
9778	pp	Q9DC70 (pp) P62073
9779	pp	Q9DC70 (pp) Q9Z1P6
9780	pp	Q9DC70 (pp) P42125
9781	pp	Q9DC70 (pp) Q9CQH3
9782	pp	Q9DC70 (pp) P56391
9783	pp	Q9DC70 (pp) P52503
9784	pp	Q9DC70 (pp) P97450
9785	pp	Q9DC70 (pp) Q99LC3
9786	pp	Q9DC70 (pp) Q99KI0
9787	pp	Q9DC70 (pp) P17751
9788	pp	Q9DC70 (pp) Q9D0M3
9789	pp	Q9DC70 (pp) Q9DCJ5
9790	pp	Q9DC70 (pp) Q9DCX2
9791	pp	Q9DC70 (pp) Q9D855
9792	pp	Q9DC70 (pp) Q9DB20
9793	pp	Q9DC70 (pp) Q3UIU2
9794	pp	Q9DC70 (pp) Q9CR68
9795	pp	Q9DC70 (pp) Q91YT0
9796	pp	Q9DC70 (pp) Q9CPP6
9797	pp	Q9DC70 (pp) P56480
9798	pp	Q9DC70 (pp) P70404
9799	pp	Q9DC70 (pp) Q9ERS2
9800	pp	Q9DC70 (pp) Q9CQJ8
9801	pp	Q9DC70 (pp) Q8K3J1
9802	pp	Q9DC70 (pp) Q9CQ69
9803	pp	Q9DC70 (pp) O09111
9804	pp	Q9DC70 (pp) O08756
9805	pp	Q9DC70 (pp) Q9D3D9
9806	pp	Q9DC70 (pp) Q9DCS9
9807	pp	Q9DC70 (pp) Q91VR2
9808	pp	Q9DC70 (pp) Q91Z53
9809	pp	Q9DC70 (pp) P19783
9810	pp	Q9DC70 (pp) Q91VD9
9811	pp	Q9DC70 (pp) Q91VT4
9812	pp	Q9DC70 (pp) Q9CZ13
9813	pp	Q9DC70 (pp) Q9D6J6
9814	pp	Q9DC70 (pp) Q06185
9815	pp	Q9DC70 (pp) Q9CXZ1
9816	pp	Q9DC70 (pp) Q9DC69
9817	pp	Q9D0S9 (pp) Q91Z53
9818	pp	Q9D0S9 (pp) O08756
9819	pp	Q9D1K2 (pp) Q9Z1G4
9820	pp	Q9D1K2 (pp) P62814
9821	pp	Q9D1K2 (pp) P63082
9822	pp	Q9D1K2 (pp) Q8K3J1
9823	pp	Q9D1K2 (pp) Q9Z1G3
9824	pp	Q9D1K2 (pp) Q9WTT4
9825	pp	Q9D1K2 (pp) Q9CQZ5
9826	pp	Q9D1K2 (pp) P51863
9827	pp	Q9D1K2 (pp) Q9CQ75
9828	pp	Q9D1K2 (pp) P50516
9829	pp	Q9D1K2 (pp) Q91VM9
9830	pp	Q9D1K2 (pp) Q9Z1P6
9831	pp	Q9D1K2 (pp) Q8BVE3
9832	pp	Q9D1K2 (pp) P57746
9833	pp	Q9D1K2 (pp) P50518
9834	pp	Q9Z1G4 (pp) P50516
9835	pp	Q9Z1G4 (pp) Q9WTT4
9836	pp	Q9Z1G4 (pp) P63082
9837	pp	Q9Z1G4 (pp) Q62277
9838	pp	Q9WUM5 (pp) Q9D0K2
9839	pp	Q9WUM5 (pp) Q9DC69
9840	pp	Q9WUM5 (pp) Q9CQQ7
9841	pp	Q9WUM5 (pp) Q9DCJ5
9842	pp	Q9WUM5 (pp) P06151
9843	pp	Q9WUM5 (pp) Q9D6J6
9844	pp	Q9WUM5 (pp) Q91VR2
9845	pp	Q9WUM5 (pp) Q99JY0
9846	pp	Q9WUM5 (pp) Q60597
9847	pp	Q9WUM5 (pp) Q99LX0
9848	pp	Q9WUM5 (pp) Q9ERS2
9849	pp	Q9WUM5 (pp) Q9CQH3
9850	pp	Q9WUM5 (pp) Q60931
9851	pp	Q9WUM5 (pp) Q8VEM8
9852	pp	Q9CQN1 (pp) P63037
9853	pp	Q9CQN1 (pp) Q8K3J1
9854	pp	Q9CQN1 (pp) Q91YT0
9855	pp	Q9CQN1 (pp) P63038
9856	pp	P63037 (pp) Q91VR2
9857	pp	P63037 (pp) Q61699
9858	pp	Q9DCW4 (pp) Q9CPP6
9859	pp	Q9DCW4 (pp) Q9DCJ5
9860	pp	Q9DCW4 (pp) P56391
9861	pp	Q9DCW4 (pp) P51174
9862	pp	Q9DCW4 (pp) Q9DB20
9863	pp	Q9DCW4 (pp) Q9D3D9
9864	pp	Q9DCW4 (pp) Q8JZN5
9865	pp	Q9DCW4 (pp) Q9CQA3
9866	pp	Q9DCW4 (pp) Q9Z2I9
9867	pp	Q9DCW4 (pp) Q06185
9868	pp	Q9DCW4 (pp) O09111
9869	pp	Q9DCW4 (pp) Q9D6J5
9870	pp	Q9DCW4 (pp) Q91YT0
9871	pp	Q9DCW4 (pp) Q9ERS2
9872	pp	Q9DCW4 (pp) Q8BMS1
9873	pp	Q9DCW4 (pp) Q8K3J1
9874	pp	Q9DCW4 (pp) P08249
9875	pp	Q9DCW4 (pp) P17751
9876	pp	Q9DCW4 (pp) Q91Z53
9877	pp	Q9DCW4 (pp) Q9WUM5
9878	pp	Q9DCW4 (pp) P42125
9879	pp	Q9DCW4 (pp) Q9DBL1
9880	pp	Q9DCW4 (pp) Q921G7
9881	pp	Q9DCW4 (pp) Q99LC3
9882	pp	Q9DCW4 (pp) Q80U28
9883	pp	Q9DCW4 (pp) P19783
9884	pp	Q9DCW4 (pp) Q9DC69
9885	pp	Q9DCW4 (pp) Q99LC5
9886	pp	Q9DCW4 (pp) P52503
9887	pp	Q9DCW4 (pp) Q9CQJ8
9888	pp	Q9DCW4 (pp) Q8BH95
9889	pp	Q9DCW4 (pp) Q9DCT2
9890	pp	Q9DCW4 (pp) Q9JHI5
9891	pp	Q9DCW4 (pp) O08756
9892	pp	Q9DCW4 (pp) Q8BWT1
9893	pp	Q9DCW4 (pp) Q9DCS9
9894	pp	Q9DCW4 (pp) Q61425
9895	pp	Q9DCW4 (pp) Q9Z1P6
9896	pp	Q9DCW4 (pp) Q9D6J6
9897	pp	Q9DCW4 (pp) Q9D0S9
9898	pp	Q9DCW4 (pp) Q8QZT1
9899	pp	Q9DCW4 (pp) Q9DC70
9900	pp	Q9DCW4 (pp) Q8R4N0
9901	pp	Q9DCW4 (pp) P50544
9902	pp	Q9CPP6 (pp) Q9D6J6
9903	pp	Q9CPP6 (pp) Q9DB77
9904	pp	Q9CPP6 (pp) Q9DCX2
9905	pp	Q9CPP6 (pp) P48771
9906	pp	Q9CPP6 (pp) Q9DCJ5
9907	pp	Q9CPP6 (pp) Q99LY9
9908	pp	Q9CPP6 (pp) Q9ERS2
9909	pp	Q9CPP6 (pp) Q9CQZ6
9910	pp	Q9CPP6 (pp) Q91VD9
9911	pp	Q9CPP6 (pp) Q8K3J1
9912	pp	Q9CPP6 (pp) Q9CQ69
9913	pp	Q9CPP6 (pp) Q99LC5
9914	pp	Q9CPP6 (pp) Q9D6J5
9915	pp	Q9CPP6 (pp) Q9CQH3
9916	pp	Q9CPP6 (pp) Q9WUM5
9917	pp	Q9CPP6 (pp) Q9Z1P6
9918	pp	Q9CPP6 (pp) P56391
9919	pp	Q9CPP6 (pp) P43024
9920	pp	Q9CPP6 (pp) Q91YT0
9921	pp	P46460 (pp) Q01097
9922	pp	P46460 (pp) Q9CWZ7
9923	pp	P46460 (pp) Q62442
9924	pp	P46460 (pp) O08599
9925	pp	P46460 (pp) O35526
9926	pp	P46460 (pp) P35438
9927	pp	P46460 (pp) P23819
9928	pp	P46460 (pp) P63101
9929	pp	Q08331 (pp) Q9CQ62
9930	pp	Q08331 (pp) Q01097
9931	pp	Q9CQ62 (pp) Q99JY0
9932	pp	Q9CQ62 (pp) Q8BWT1
9933	pp	Q9CQ62 (pp) Q99LC5
9934	pp	Q9CQ62 (pp) P19096
9935	pp	Q9CQ62 (pp) P41216
9936	pp	Q9D2G2 (pp) Q91VR2
9937	pp	Q9D2G2 (pp) Q9WUM5
9938	pp	Q9D2G2 (pp) Q60597
9939	pp	Q9D2G2 (pp) Q9D3D9
9940	pp	Q3UIU2 (pp) Q9D6J6
9941	pp	Q3UIU2 (pp) Q9CQH3
9942	pp	P31938 (pp) P63085
9943	pp	P31938 (pp) P35438
9944	pp	P31938 (pp) P16054
9945	pp	P17427 (pp) P17426
9946	pp	P17427 (pp) Q68FD5
9947	pp	P17427 (pp) O08585
9948	pp	P17427 (pp) Q80VP1
9949	pp	P17427 (pp) P62743
9950	pp	P17427 (pp) P39053
9951	pp	P17427 (pp) Q8CHC4
9952	pp	P17427 (pp) Q6IRU5
9953	pp	P17427 (pp) P84091
9954	pp	P17427 (pp) Q9DBG3
9955	pp	P17426 (pp) P62743
9956	pp	P17426 (pp) O08585
9957	pp	P17426 (pp) Q80VP1
9958	pp	P17426 (pp) Q8CHC4
9959	pp	P57746 (pp) P50516
9960	pp	P57746 (pp) Q8BVE3
9961	pp	P57746 (pp) Q9Z1G4
9962	pp	P57746 (pp) Q9CQZ6
9963	pp	P57746 (pp) P97450
9964	pp	P57746 (pp) Q9Z1G3
9965	pp	P57746 (pp) Q9WTT4
9966	pp	P57746 (pp) P23506
9967	pp	P57746 (pp) P63082
9968	pp	P57746 (pp) Q9CQH3
9969	pp	P50516 (pp) Q9JHU4
9970	pp	P50516 (pp) Q9R0K7
9971	pp	P50516 (pp) Q8BPN8
9972	pp	P50516 (pp) P60710
9973	pp	P50516 (pp) Q7TPR4
9974	pp	P50516 (pp) P39053
9975	pp	P50516 (pp) Q7TQF7
9976	pp	P50516 (pp) P53395
9977	pp	P50516 (pp) P55088
9978	pp	P50516 (pp) Q9D6J6
9979	pp	P50516 (pp) P46460
9980	pp	P50516 (pp) P46660
9981	pp	P50516 (pp) Q9QYR6
9982	pp	P50516 (pp) P01831
9983	pp	P50516 (pp) P28660
9984	pp	P50516 (pp) Q9D6R2
9985	pp	P50516 (pp) P47754
9986	pp	P50516 (pp) Q5SQX6
9987	pp	P50516 (pp) Q5DQR4
9988	pp	P50516 (pp) O35643
9989	pp	P50516 (pp) Q9Z2I0
9990	pp	P50516 (pp) Q62425
9991	pp	P50516 (pp) P63082
9992	pp	P50516 (pp) O08539
9993	pp	P50516 (pp) Q9JLM8
9994	pp	P50516 (pp) Q8VD37
9995	pp	P50516 (pp) P17427
9996	pp	P50516 (pp) Q99LX0
9997	pp	P50516 (pp) Q80XN0
9998	pp	P50516 (pp) O54983
9999	pp	P50516 (pp) P17426
10000	pp	P50516 (pp) Q9Z0E0
10001	pp	P50516 (pp) Q9Z1J3
10002	pp	P50516 (pp) Q3UHL1
10003	pp	P50516 (pp) Q91VR2
10004	pp	P50516 (pp) P12382
10005	pp	P50516 (pp) P08553
10006	pp	P70404 (pp) Q91VR2
10007	pp	P70404 (pp) Q9WUM5
10008	pp	P70404 (pp) Q9DC69
10009	pp	P70404 (pp) Q60597
10010	pp	P70404 (pp) Q9D2G2
10011	pp	O88441 (pp) Q9D6J6
10012	pp	O88441 (pp) Q9CQH3
10013	pp	O88441 (pp) Q6PB66
10014	pp	Q7TQI3 (pp) P68510
10015	pp	P17751 (pp) P06745
10016	pp	P17751 (pp) P05063
10017	pp	P17751 (pp) P17182
10018	pp	P17751 (pp) Q99LX0
10019	pp	P17751 (pp) P09411
10020	pp	P17751 (pp) Q93092
10021	pp	P17751 (pp) Q9CZ13
10022	pp	P17751 (pp) Q9D6J6
10023	pp	P17751 (pp) P56480
10024	pp	P17751 (pp) Q91VD9
10025	pp	P17751 (pp) P70296
10026	pp	P17751 (pp) Q9D2G2
10027	pp	P17751 (pp) Q64521
10028	pp	P17751 (pp) P47857
10029	pp	P17751 (pp) P16858
10030	pp	P17751 (pp) Q9WUM5
10031	pp	P17751 (pp) P23506
10032	pp	P17751 (pp) P99029
10033	pp	P17751 (pp) Q8K3J1
10034	pp	P17751 (pp) P97807
10035	pp	P17751 (pp) Q03265
10036	pp	P17751 (pp) P05064
10037	pp	P17751 (pp) Q9CR68
10038	pp	P17751 (pp) Q9WUA3
10039	pp	P17751 (pp) Q91VR2
10040	pp	P17751 (pp) P63101
10041	pp	P17751 (pp) P52480
10042	pp	P17751 (pp) P06151
10043	pp	P17751 (pp) Q9R0P5
10044	pp	P17751 (pp) Q91YT0
10045	pp	P09411 (pp) Q9DCD0
10046	pp	P09411 (pp) P17182
10047	pp	P09411 (pp) P17742
10048	pp	P09411 (pp) P16858
10049	pp	P09411 (pp) P06151
10050	pp	Q9Z1P6 (pp) Q9D6J6
10051	pp	Q9Z1P6 (pp) Q9ERS2
10052	pp	Q9Z1P6 (pp) P56391
10053	pp	Q9Z1P6 (pp) Q3UIU2
10054	pp	Q9Z1P6 (pp) Q9D3D9
10055	pp	Q9Z1P6 (pp) Q9DC69
10056	pp	Q9Z1P6 (pp) Q9CPQ8
10057	pp	Q9Z1P6 (pp) Q99LX0
10058	pp	Q9Z1P6 (pp) Q9CQ69
10059	pp	Q9Z1P6 (pp) Q9CQH3
10060	pp	Q9Z1P6 (pp) Q9DCJ5
10061	pp	Q9Z1P6 (pp) Q8K3J1
10062	pp	Q9Z1P6 (pp) Q06185
10063	pp	Q9Z1P6 (pp) O08756
10064	pp	Q9Z1P6 (pp) Q9DCS9
10065	pp	Q9Z1P6 (pp) Q91YT0
10066	pp	Q9Z1P6 (pp) Q9DCX2
10067	pp	Q9Z1P6 (pp) O09111
10068	pp	P63137 (pp) P62812
10069	pp	P62812 (pp) P63328
10070	pp	P62812 (pp) P22723
10071	pp	O70325 (pp) Q99LX0
10072	pp	O70325 (pp) Q9D3D9
10073	pp	O70325 (pp) Q9ERS2
10074	pp	O70325 (pp) P99029
10075	pp	P48771 (pp) Q9DC69
10076	pp	P48771 (pp) Q91VR2
10077	pp	P48771 (pp) P56391
10078	pp	P48771 (pp) Q99LX0
10079	pp	P48771 (pp) Q06185
10080	pp	P48771 (pp) Q9D6J6
10081	pp	P48771 (pp) Q9CQH3
10082	pp	P48771 (pp) Q9CQ69
10083	pp	P48771 (pp) P43024
10084	pp	Q64133 (pp) P47738
10085	pp	Q64133 (pp) Q9JLJ2
10086	pp	Q64133 (pp) Q9CZS1
10087	pp	Q64133 (pp) Q9DBF1
10088	pp	P47738 (pp) P61922
10089	pp	P47738 (pp) Q8CHT0
10090	pp	P47738 (pp) Q9EQ20
10091	pp	P47738 (pp) Q8BW75
10092	pp	P63005 (pp) Q6PER3
10093	pp	P63005 (pp) O08788
10094	pp	P63005 (pp) Q99KJ8
10095	pp	P63005 (pp) P20357
10096	pp	Q6PER3 (pp) O08788
10097	pp	O70161 (pp) Q9Z1B3
10098	pp	O70161 (pp) P17426
10099	pp	O70161 (pp) Q71LX4
10100	pp	Q9Z1B3 (pp) Q01097
10101	pp	Q9Z1B3 (pp) P35438
10102	pp	Q921G7 (pp) Q8BWT1
10103	pp	Q921G7 (pp) Q61425
10104	pp	Q921G7 (pp) Q8BMS1
10105	pp	Q921G7 (pp) Q9D6J6
10106	pp	Q921G7 (pp) Q99JY0
10107	pp	Q921G7 (pp) Q9WUM5
10108	pp	Q921G7 (pp) Q80U28
10109	pp	Q921G7 (pp) Q9CQ62
10110	pp	Q921G7 (pp) Q99LC5
10111	pp	Q8BWT1 (pp) Q9D0K2
10112	pp	Q8BWT1 (pp) Q9DBL1
10113	pp	Q8BWT1 (pp) Q9EQ20
10114	pp	Q8BWT1 (pp) Q99JY0
10115	pp	Q8BWT1 (pp) Q8BMS1
10116	pp	Q8BWT1 (pp) Q9WUM5
10117	pp	Q8BWT1 (pp) O08756
10118	pp	Q8BWT1 (pp) Q91ZA3
10119	pp	Q9CQA3 (pp) Q9D0M3
10120	pp	Q9CQA3 (pp) Q9CZ13
10121	pp	Q9CQA3 (pp) Q06185
10122	pp	Q9CQA3 (pp) Q8K3J1
10123	pp	Q9CQA3 (pp) Q9Z2I9
10124	pp	Q9CQA3 (pp) Q9Z1P6
10125	pp	Q9CQA3 (pp) Q9DCS9
10126	pp	Q9CQA3 (pp) Q9CQZ6
10127	pp	Q9CQA3 (pp) Q9D2G2
10128	pp	Q9CQA3 (pp) Q9DCJ5
10129	pp	Q9CQA3 (pp) P54071
10130	pp	Q9CQA3 (pp) Q99KI0
10131	pp	Q9CQA3 (pp) Q9CQ62
10132	pp	Q9CQA3 (pp) Q9DB20
10133	pp	Q9CQA3 (pp) Q9D855
10134	pp	Q9CQA3 (pp) P97807
10135	pp	Q9CQA3 (pp) P70404
10136	pp	Q9CQA3 (pp) Q9CPQ1
10137	pp	Q9CQA3 (pp) Q9CQH3
10138	pp	Q9CQA3 (pp) P52503
10139	pp	Q9CQA3 (pp) Q9DC69
10140	pp	Q9CQA3 (pp) Q9WUM5
10141	pp	Q9CQA3 (pp) Q9D6J5
10142	pp	Q9CQA3 (pp) P56391
10143	pp	Q9CQA3 (pp) Q9DB77
10144	pp	Q9CQA3 (pp) Q9CQ75
10145	pp	Q9CQA3 (pp) Q8K2B3
10146	pp	Q9CQA3 (pp) Q9CR68
10147	pp	Q9CQA3 (pp) Q91VD9
10148	pp	Q9CQA3 (pp) Q9D6J6
10149	pp	Q9CQA3 (pp) P20108
10150	pp	Q9CQA3 (pp) Q9CQZ5
10151	pp	Q9CQA3 (pp) Q99LC5
10152	pp	Q9CQA3 (pp) Q9CQQ7
10153	pp	Q9CQA3 (pp) Q7TMF3
10154	pp	Q9CQA3 (pp) Q03265
10155	pp	Q9CQA3 (pp) Q91VR2
10156	pp	Q9CQA3 (pp) Q61425
10157	pp	Q9CQA3 (pp) Q64521
10158	pp	Q9CQA3 (pp) Q8VEM8
10159	pp	Q9CQA3 (pp) Q91YT0
10160	pp	Q9CQA3 (pp) Q9DCX2
10161	pp	Q9CQA3 (pp) P56480
10162	pp	Q9CQA3 (pp) P97450
10163	pp	Q9CQA3 (pp) Q9DCD0
10164	pp	Q9CQA3 (pp) Q9CPP6
10165	pp	Q9CQA3 (pp) Q91WD5
10166	pp	Q9CQA3 (pp) P19783
10167	pp	Q9CQA3 (pp) Q9D6R2
10168	pp	Q9CQA3 (pp) Q9DC70
10169	pp	Q9CQA3 (pp) Q9CQ69
10170	pp	Q9CQA3 (pp) P17751
10171	pp	Q9CQA3 (pp) P43024
10172	pp	Q9CQA3 (pp) O09111
10173	pp	Q9CQA3 (pp) Q9D3D9
10174	pp	Q9CQA3 (pp) Q99LX0
10175	pp	Q9CQA3 (pp) P19536
10176	pp	Q9CQA3 (pp) P99029
10177	pp	Q9CQA3 (pp) Q9ERS2
10178	pp	Q9CQA3 (pp) Q9CQJ8
10179	pp	Q9CQA3 (pp) P08249
10180	pp	Q9CQA3 (pp) Q60597
10181	pp	P12787 (pp) Q9CR68
10182	pp	P12787 (pp) P52503
10183	pp	P12787 (pp) Q9D6R2
10184	pp	P12787 (pp) Q9DCS9
10185	pp	P12787 (pp) Q99LC5
10186	pp	P12787 (pp) Q9D3D9
10187	pp	P12787 (pp) Q8K3J1
10188	pp	P12787 (pp) Q7TMF3
10189	pp	P12787 (pp) Q8VEM8
10190	pp	P12787 (pp) P17665
10191	pp	P12787 (pp) Q9DC69
10192	pp	P12787 (pp) Q9DCW4
10193	pp	P12787 (pp) P97450
10194	pp	P12787 (pp) Q9DCT2
10195	pp	P12787 (pp) P56391
10196	pp	P12787 (pp) Q9ERS2
10197	pp	P12787 (pp) P19783
10198	pp	P12787 (pp) Q9CQQ7
10199	pp	P12787 (pp) Q9D6J6
10200	pp	P12787 (pp) Q9DB20
10201	pp	P12787 (pp) P00405
10202	pp	P12787 (pp) Q9CQZ5
10203	pp	P12787 (pp) Q9DCJ5
10204	pp	P12787 (pp) Q9D0M3
10205	pp	P12787 (pp) Q9D6J5
10206	pp	P12787 (pp) Q9CQ69
10207	pp	P12787 (pp) Q9CQJ8
10208	pp	P12787 (pp) Q9CPQ1
10209	pp	P12787 (pp) Q9DC70
10210	pp	P12787 (pp) Q9CQ54
10211	pp	P12787 (pp) Q91VR2
10212	pp	P12787 (pp) Q99LC3
10213	pp	P12787 (pp) Q9DCX2
10214	pp	P12787 (pp) Q9CQH3
10215	pp	P12787 (pp) P09671
10216	pp	P12787 (pp) Q03265
10217	pp	P12787 (pp) Q9D855
10218	pp	P12787 (pp) Q9CQA3
10219	pp	P12787 (pp) Q9DB77
10220	pp	P12787 (pp) P43024
10221	pp	P12787 (pp) P19536
10222	pp	P12787 (pp) Q9CQZ6
10223	pp	P12787 (pp) Q9CXZ1
10224	pp	P12787 (pp) Q06185
10225	pp	P12787 (pp) P56480
10226	pp	Q61425 (pp) Q99LC5
10227	pp	Q61425 (pp) Q9WUM5
10228	pp	Q61425 (pp) Q9DBL1
10229	pp	Q61425 (pp) Q9D0K2
10230	pp	Q61425 (pp) Q9CZS1
10231	pp	Q61425 (pp) Q8BMS1
10232	pp	Q61425 (pp) Q9CQ62
10233	pp	Q61425 (pp) Q8BWT1
10234	pp	Q61425 (pp) Q99JY0
10235	pp	Q61425 (pp) O08756
10236	pp	Q61425 (pp) P47738
10237	pp	Q61425 (pp) Q8QZT1
10238	pp	Q61425 (pp) Q9EQ20
10239	pp	Q99LC5 (pp) O09111
10240	pp	Q99LC5 (pp) P50544
10241	pp	Q99LC5 (pp) Q9D6J6
10242	pp	Q99LC5 (pp) Q9DCJ5
10243	pp	Q99LC5 (pp) Q6PB66
10244	pp	Q99LC5 (pp) Q91ZJ5
10245	pp	Q99LC5 (pp) Q9CQH3
10246	pp	Q99LC5 (pp) Q80U28
10247	pp	Q99LC5 (pp) Q91VR2
10248	pp	Q99LC5 (pp) Q9DBL1
10249	pp	Q99LC5 (pp) Q99JY0
10250	pp	Q99LC5 (pp) O08756
10251	pp	Q99LC5 (pp) Q91YT0
10252	pp	Q99LC5 (pp) Q9Z0X1
10253	pp	Q99LC5 (pp) Q8BWT1
10254	pp	Q99LC5 (pp) Q9WUM5
10255	pp	Q99LC5 (pp) Q9CR68
10256	pp	Q99LC5 (pp) O88441
10257	pp	Q99LC5 (pp) Q9DC69
10258	pp	Q8BGH2 (pp) Q99LX0
10259	pp	Q8BGH2 (pp) Q8BH95
10260	pp	Q8BGH2 (pp) Q8CAQ8
10261	pp	Q8BGH2 (pp) Q9CZ13
10262	pp	Q8BGH2 (pp) Q9DC69
10263	pp	Q8BGH2 (pp) Q9QYA2
10264	pp	Q8BGH2 (pp) O88441
10265	pp	Q8BGH2 (pp) P97807
10266	pp	Q8BGH2 (pp) Q9CRB9
10267	pp	Q8BGH2 (pp) Q9DCJ5
10268	pp	Q8BGH2 (pp) Q9WUM5
10269	pp	Q8BGH2 (pp) Q91YT0
10270	pp	Q99LX0 (pp) Q62277
10271	pp	Q99LX0 (pp) O09111
10272	pp	Q99LX0 (pp) Q9D6J6
10273	pp	Q99LX0 (pp) O55042
10274	pp	Q99LX0 (pp) O08756
10275	pp	Q99LX0 (pp) Q91VR2
10276	pp	Q99LX0 (pp) Q9CQH3
10277	pp	P62331 (pp) O70161
10278	pp	Q8K1Z0 (pp) Q9DCJ5
10279	pp	Q8K1Z0 (pp) Q9WUM5
10280	pp	Q8K1Z0 (pp) Q9D6J6
10281	pp	Q8K1Z0 (pp) Q9ERS2
10282	pp	P11499 (pp) P62259
10283	pp	P11499 (pp) Q60864
10284	pp	P11499 (pp) P63038
10285	pp	P11499 (pp) P63037
10286	pp	P11499 (pp) P60710
10287	pp	P11499 (pp) Q9CR16
10288	pp	P05064 (pp) P17710
10289	pp	P05064 (pp) Q9WUA3
10290	pp	P05064 (pp) P17182
10291	pp	P05064 (pp) Q61735
10292	pp	P05064 (pp) P05063
10293	pp	P17710 (pp) Q9WUA3
10294	pp	P48320 (pp) P61922
10295	pp	P48320 (pp) P15105
10296	pp	P61922 (pp) Q9DBF1
10297	pp	P61922 (pp) P15105
10298	pp	P61922 (pp) Q9EQ20
10299	pp	P12023 (pp) P46460
10300	pp	P12023 (pp) Q9WV18
10301	pp	P12023 (pp) P04925
10302	pp	P12023 (pp) P63044
10303	pp	P12023 (pp) P62823
10304	pp	P12023 (pp) Q9CZT8
10305	pp	P12023 (pp) P06837
10306	pp	P12023 (pp) P63011
10307	pp	P12023 (pp) O35526
10308	pp	P12023 (pp) O08756
10309	pp	P12023 (pp) P68254
10310	pp	P12023 (pp) Q8VDN2
10311	pp	P12023 (pp) Q9JHU4
10312	pp	P12023 (pp) Q62277
10313	pp	P12023 (pp) Q9Z1G3
10314	pp	P12023 (pp) Q810U3
10315	pp	P12023 (pp) P62259
10316	pp	P12023 (pp) Q9D6F9
10317	pp	P12023 (pp) Q61548
10318	pp	P12023 (pp) Q60932
10319	pp	P12023 (pp) P35564
10320	pp	P12023 (pp) P56564
10321	pp	P12023 (pp) Q64332
10322	pp	P12023 (pp) O88935
10323	pp	P12023 (pp) P07901
10324	pp	P12023 (pp) P61982
10325	pp	P12023 (pp) O88737
10326	pp	P12023 (pp) P13595
10327	pp	P12023 (pp) Q9JIS5
10328	pp	P12023 (pp) P63101
10329	pp	P12023 (pp) P60710
10330	pp	P12023 (pp) P68510
10331	pp	P12023 (pp) O08599
10332	pp	P12023 (pp) P39053
10333	pp	P12023 (pp) P12960
10334	pp	P12023 (pp) P08551
10335	pp	P12023 (pp) P62821
10336	pp	P12023 (pp) P46096
10337	pp	P12023 (pp) P57780
10338	pp	P12023 (pp) Q91ZZ3
10339	pp	P12023 (pp) P28652
10340	pp	P12023 (pp) O54991
10341	pp	P12023 (pp) Q812A2
10342	pp	P12023 (pp) P46660
10343	pp	P12023 (pp) P60879
10344	pp	P12023 (pp) O55042
10345	pp	P12023 (pp) P97300
10346	pp	P12023 (pp) Q62420
10347	pp	P12023 (pp) P01831
10348	pp	P12023 (pp) Q68FD5
10349	pp	P12023 (pp) Q9Z1G4
10350	pp	P12023 (pp) Q9CQV8
10351	pp	P12023 (pp) Q61316
10352	pp	P12023 (pp) P11627
10353	pp	P12023 (pp) P63017
10354	pp	P12023 (pp) P61264
10355	pp	P62814 (pp) P51863
10356	pp	P62814 (pp) P50516
10357	pp	P62814 (pp) Q8BVE3
10358	pp	P62814 (pp) P57746
10359	pp	P62814 (pp) Q9DC69
10360	pp	P62814 (pp) Q9Z1G3
10361	pp	P62814 (pp) P63082
10362	pp	P62814 (pp) Q91VM9
10363	pp	P62814 (pp) P50518
10364	pp	P62814 (pp) Q9WTT4
10365	pp	P62814 (pp) Q9Z1G4
10366	pp	Q9WV92 (pp) Q8R5M8
10367	pp	Q9WV92 (pp) P12023
10368	pp	Q8R5M8 (pp) O70589
10369	pp	O35526 (pp) Q62442
10370	pp	O35526 (pp) P63040
10371	pp	O35526 (pp) P60879
10372	pp	O35526 (pp) O08599
10373	pp	Q9WV18 (pp) Q80T41
10374	pp	P56391 (pp) O09111
10375	pp	P56391 (pp) Q9D3D9
10376	pp	P56391 (pp) Q9ERS2
10377	pp	P56391 (pp) P00405
10378	pp	P56391 (pp) P17665
10379	pp	P56391 (pp) Q9DCX2
10380	pp	Q9D172 (pp) Q9CQH3
10381	pp	Q9D172 (pp) P97807
10382	pp	Q9D172 (pp) Q91YT0
10383	pp	Q9D172 (pp) Q9CQZ5
10384	pp	Q9D172 (pp) Q9DCT2
10385	pp	Q9D172 (pp) Q9CZ13
10386	pp	Q9D172 (pp) Q91WD5
10387	pp	Q9D172 (pp) Q8BH95
10388	pp	Q9D172 (pp) Q9DCJ5
10389	pp	Q9D172 (pp) P42125
10390	pp	Q9D172 (pp) Q9DC70
10391	pp	Q62442 (pp) P61264
10392	pp	P26443 (pp) Q91Z53
10393	pp	P26443 (pp) Q61425
10394	pp	P26443 (pp) P97807
10395	pp	P26443 (pp) P05202
10396	pp	P26443 (pp) P15105
10397	pp	P26443 (pp) Q9D6R2
10398	pp	P26443 (pp) Q8BH04
10399	pp	P26443 (pp) Q8CHT0
10400	pp	P26443 (pp) P29758
10401	pp	P26443 (pp) P05063
10402	pp	P26443 (pp) Q05920
10403	pp	P26443 (pp) P61922
10404	pp	P26443 (pp) P17751
10405	pp	P26443 (pp) Q60597
10406	pp	P26443 (pp) P70404
10407	pp	P26443 (pp) P56480
10408	pp	P26443 (pp) P63038
10409	pp	P26443 (pp) Q99KI0
10410	pp	P26443 (pp) P48320
10411	pp	P26443 (pp) P54071
10412	pp	P26443 (pp) Q9DCD0
10413	pp	Q91Z53 (pp) P45376
10414	pp	Q99KJ8 (pp) O08788
10415	pp	Q99KJ8 (pp) P28667
10416	pp	O08788 (pp) O35465
10417	pp	Q99KI0 (pp) Q9D2G2
10418	pp	Q99KI0 (pp) Q62351
10419	pp	Q99KI0 (pp) Q91VR2
10420	pp	Q99KI0 (pp) Q9CQH3
10421	pp	Q99KI0 (pp) P17751
10422	pp	Q99KI0 (pp) Q9DC69
10423	pp	Q99KI0 (pp) Q9DB77
10424	pp	Q99KI0 (pp) Q9CZ13
10425	pp	Q99KI0 (pp) P63038
10426	pp	Q99KI0 (pp) P54071
10427	pp	Q99KI0 (pp) P47857
10428	pp	Q99KI0 (pp) P52480
10429	pp	Q99KI0 (pp) Q05920
10430	pp	Q99KI0 (pp) Q9D3D9
10431	pp	Q99KI0 (pp) P70404
10432	pp	Q99KI0 (pp) O09111
10433	pp	Q99KI0 (pp) Q9D6R2
10434	pp	Q99KI0 (pp) Q9ERS2
10435	pp	Q99KI0 (pp) Q91YT0
10436	pp	Q99KI0 (pp) Q9CR68
10437	pp	Q99KI0 (pp) P06745
10438	pp	Q99KI0 (pp) Q9DB20
10439	pp	Q99KI0 (pp) Q9DCJ5
10440	pp	Q99KI0 (pp) Q9D0M3
10441	pp	Q99KI0 (pp) Q9CPP6
10442	pp	Q99KI0 (pp) Q8K1M6
10443	pp	Q99KI0 (pp) P68510
10444	pp	Q99KI0 (pp) Q9WUM5
10445	pp	Q99KI0 (pp) Q60597
10446	pp	Q99KI0 (pp) Q99LX0
10447	pp	Q99KI0 (pp) P35486
10448	pp	Q99KI0 (pp) Q9Z1J3
10449	pp	Q99KI0 (pp) Q03265
10450	pp	Q99KI0 (pp) Q01097
10451	pp	Q99KI0 (pp) P97807
10452	pp	Q99KI0 (pp) P56480
10453	pp	Q99KI0 (pp) P05064
10454	pp	Q99KI0 (pp) Q9D6J6
10455	pp	Q9ERS2 (pp) P50516
10456	pp	Q9ERS2 (pp) Q91VR2
10457	pp	Q9ERS2 (pp) O09111
10458	pp	Q9ERS2 (pp) Q9D6J6
10459	pp	Q9ERS2 (pp) Q9CQH3
10460	pp	P97807 (pp) Q06185
10461	pp	P97807 (pp) P54071
10462	pp	P97807 (pp) Q99LX0
10463	pp	P97807 (pp) Q9D2G2
10464	pp	P97807 (pp) Q9D6R2
10465	pp	P97807 (pp) Q9CQQ7
10466	pp	P97807 (pp) P48771
10467	pp	P97807 (pp) O08756
10468	pp	P97807 (pp) Q9DCD0
10469	pp	P97807 (pp) Q9DCJ5
10470	pp	P97807 (pp) Q9DCS9
10471	pp	P97807 (pp) Q99LC5
10472	pp	P97807 (pp) Q9DC69
10473	pp	P97807 (pp) Q60597
10474	pp	P97807 (pp) Q05920
10475	pp	P97807 (pp) Q91VR2
10476	pp	P97807 (pp) Q91YT0
10477	pp	P97807 (pp) Q8K3J1
10478	pp	P97807 (pp) P06151
10479	pp	P97807 (pp) Q9WUM5
10480	pp	P97807 (pp) Q9D6J6
10481	pp	P97807 (pp) P06745
10482	pp	P97807 (pp) Q8BMF4
10483	pp	P97807 (pp) Q61425
10484	pp	P97807 (pp) Q9CR68
10485	pp	P97807 (pp) Q921G7
10486	pp	P97807 (pp) Q9CQH3
10487	pp	P97807 (pp) Q60931
10488	pp	P97807 (pp) P05202
10489	pp	Q6PHZ2 (pp) P60710
10490	pp	Q6PHZ2 (pp) P99024
10491	pp	Q6PHZ2 (pp) P35436
10492	pp	Q6PHZ2 (pp) P63101
10493	pp	Q6PHZ2 (pp) P68369
10494	pp	P60710 (pp) Q9R0Q6
10495	pp	P60710 (pp) P59999
10496	pp	P60710 (pp) Q9D898
10497	pp	P60710 (pp) P35438
10498	pp	P60710 (pp) P16054
10499	pp	P60710 (pp) Q9CPW4
10500	pp	P60710 (pp) Q9JM76
10501	pp	P60710 (pp) O70589
10502	pp	Q02248 (pp) P05480
10503	pp	Q02248 (pp) Q61301
10504	pp	Q02248 (pp) P35438
10505	pp	Q02248 (pp) P39688
10506	pp	Q02248 (pp) P68510
10507	pp	Q02248 (pp) Q68FH0
10508	pp	Q02248 (pp) O88712
10509	pp	Q02248 (pp) Q01097
10510	pp	Q02248 (pp) P63001
10511	pp	P05480 (pp) P35436
10512	pp	P05480 (pp) P35438
10513	pp	P05480 (pp) P39053
10514	pp	P05480 (pp) P30999
10515	pp	P05480 (pp) P23242
10516	pp	P51881 (pp) P62259
10517	pp	P51881 (pp) P16054
10518	pp	Q91WD5 (pp) Q8K2B3
10519	pp	Q91WD5 (pp) Q9CQZ6
10520	pp	Q91WD5 (pp) Q99MN9
10521	pp	Q91WD5 (pp) Q9DCJ5
10522	pp	Q91WD5 (pp) P08249
10523	pp	Q91WD5 (pp) P70404
10524	pp	Q91WD5 (pp) Q8VEM8
10525	pp	Q91WD5 (pp) Q9D0M3
10526	pp	Q91WD5 (pp) Q99KI0
10527	pp	Q91WD5 (pp) Q99JY0
10528	pp	Q91WD5 (pp) Q91VR2
10529	pp	Q91WD5 (pp) Q9CQ69
10530	pp	Q91WD5 (pp) Q9D855
10531	pp	Q91WD5 (pp) Q9CQH3
10532	pp	Q91WD5 (pp) Q9DC70
10533	pp	Q91WD5 (pp) P97807
10534	pp	Q91WD5 (pp) Q9CQQ7
10535	pp	Q91WD5 (pp) Q99LX0
10536	pp	Q91WD5 (pp) Q99LC3
10537	pp	Q91WD5 (pp) Q9CQZ5
10538	pp	Q91WD5 (pp) P97450
10539	pp	Q91WD5 (pp) Q9CQC7
10540	pp	Q91WD5 (pp) Q9CQJ8
10541	pp	Q91WD5 (pp) Q9DB77
10542	pp	Q91WD5 (pp) Q9CXZ1
10543	pp	Q91WD5 (pp) Q9D6J6
10544	pp	Q91WD5 (pp) Q9DCS9
10545	pp	Q91WD5 (pp) Q9CR68
10546	pp	Q91WD5 (pp) Q3ULD5
10547	pp	Q91WD5 (pp) P20108
10548	pp	Q91WD5 (pp) Q8BGH2
10549	pp	Q91WD5 (pp) Q03265
10550	pp	Q91WD5 (pp) Q7TMF3
10551	pp	Q91WD5 (pp) Q8CAQ8
10552	pp	Q91WD5 (pp) Q6PB66
10553	pp	Q91WD5 (pp) P56480
10554	pp	Q91WD5 (pp) Q8K3J1
10555	pp	Q91WD5 (pp) Q9D6J5
10556	pp	Q91WD5 (pp) Q9CQ75
10557	pp	Q91WD5 (pp) Q9ERS2
10558	pp	Q91WD5 (pp) Q8K1Z0
10559	pp	Q91WD5 (pp) P52503
10560	pp	Q91WD5 (pp) P17751
10561	pp	Q91WD5 (pp) Q8BH95
10562	pp	Q91WD5 (pp) Q99LC5
10563	pp	Q91WD5 (pp) Q9CZ13
10564	pp	Q91WD5 (pp) Q9DB20
10565	pp	Q91WD5 (pp) P09411
10566	pp	Q91WD5 (pp) Q91VD9
10567	pp	Q91WD5 (pp) P35486
10568	pp	Q91WD5 (pp) Q9WUM5
10569	pp	Q91WD5 (pp) Q9DC69
10570	pp	Q91WD5 (pp) Q91YT0
10571	pp	Q91WD5 (pp) Q99LY9
10572	pp	Q91WD5 (pp) Q9CPP6
10573	pp	Q8K2B3 (pp) P97807
10574	pp	Q8K2B3 (pp) Q8JZQ2
10575	pp	Q8K2B3 (pp) Q8VEM8
10576	pp	Q8K2B3 (pp) Q9D0M3
10577	pp	Q8K2B3 (pp) Q91VR2
10578	pp	Q8K2B3 (pp) Q9D2G2
10579	pp	Q8K2B3 (pp) Q9Z0X1
10580	pp	Q8K2B3 (pp) Q9D051
10581	pp	Q8K2B3 (pp) Q03265
10582	pp	Q8K2B3 (pp) P52196
10583	pp	Q8K2B3 (pp) Q9CPP6
10584	pp	Q8K2B3 (pp) Q9CQQ7
10585	pp	Q8K2B3 (pp) Q99KI0
10586	pp	Q8K2B3 (pp) P09411
10587	pp	Q8K2B3 (pp) Q91YT0
10588	pp	Q8K2B3 (pp) Q9Z2I9
10589	pp	Q8K2B3 (pp) P00493
10590	pp	Q8K2B3 (pp) Q60597
10591	pp	Q8K2B3 (pp) P56480
10592	pp	Q8K2B3 (pp) Q9WUM5
10593	pp	Q8K2B3 (pp) Q99LC5
10594	pp	Q8K2B3 (pp) Q9CR68
10595	pp	Q8K2B3 (pp) Q9CZ13
10596	pp	Q8K2B3 (pp) Q9DC69
10597	pp	Q8K2B3 (pp) Q9D6J6
10598	pp	Q8K2B3 (pp) Q9DB77
10599	pp	Q8K2B3 (pp) P35486
10600	pp	Q8K2B3 (pp) Q8K3J1
10601	pp	Q8K2B3 (pp) P63038
10602	pp	Q8K2B3 (pp) Q9D6R2
10603	pp	Q8K2B3 (pp) Q91VD9
10604	pp	Q8K2B3 (pp) P17751
10605	pp	Q8K2B3 (pp) P58281
10606	pp	Q8K2B3 (pp) Q99JY0
10607	pp	P68369 (pp) P39053
10608	pp	P68369 (pp) P27546
10609	pp	P68369 (pp) P63101
10610	pp	P68369 (pp) P35438
10611	pp	P68369 (pp) P60879
10612	pp	Q8VEM8 (pp) Q9D6J6
10613	pp	Q8VEM8 (pp) Q9CQH3
10614	pp	Q8VEM8 (pp) Q9CQQ7
10615	pp	Q8VEM8 (pp) Q9D3D9
10616	pp	Q3ULD5 (pp) Q8R4N0
10617	pp	Q3ULD5 (pp) Q99MN9
10618	pp	Q3ULD5 (pp) Q9JHI5
10619	pp	Q3ULD5 (pp) Q921G7
10620	pp	Q3ULD5 (pp) Q8BMS1
10621	pp	Q3ULD5 (pp) Q8BH95
10622	pp	Q3ULD5 (pp) Q91ZA3
10623	pp	Q3ULD5 (pp) Q99MR8
10624	pp	Q3ULD5 (pp) Q9D0K2
10625	pp	Q3ULD5 (pp) Q05920
10626	pp	Q8R4N0 (pp) Q91ZA3
10627	pp	Q8R4N0 (pp) Q99MR8
10628	pp	Q8R4N0 (pp) P05480
10629	pp	Q8R4N0 (pp) Q9WUM5
10630	pp	Q8R4N0 (pp) Q99LC5
10631	pp	P52503 (pp) Q9D6J6
10632	pp	P52503 (pp) P48771
10633	pp	P52503 (pp) Q9CQZ6
10634	pp	P52503 (pp) Q91YT0
10635	pp	P52503 (pp) Q9CZ13
10636	pp	P52503 (pp) Q91VD9
10637	pp	P52503 (pp) Q9CQZ5
10638	pp	P52503 (pp) P42125
10639	pp	P52503 (pp) P43024
10640	pp	P52503 (pp) P62073
10641	pp	P52503 (pp) Q9DC69
10642	pp	P52503 (pp) Q8K3J1
10643	pp	P52503 (pp) Q9CQQ7
10644	pp	P52503 (pp) Q9CQJ8
10645	pp	P52503 (pp) Q9CQH3
10646	pp	P52503 (pp) Q9CR68
10647	pp	P52503 (pp) P56391
10648	pp	P52503 (pp) Q9DB20
10649	pp	P52503 (pp) Q99LC3
10650	pp	P52503 (pp) P97450
10651	pp	P52503 (pp) Q99LX0
10652	pp	P52503 (pp) Q9DCJ5
10653	pp	P52503 (pp) Q9CXZ1
10654	pp	P52503 (pp) Q9D0M3
10655	pp	P52503 (pp) Q9CQC7
10656	pp	P52503 (pp) Q9D6J5
10657	pp	P52503 (pp) P99029
10658	pp	P52503 (pp) Q9ERS2
10659	pp	P52503 (pp) Q06185
10660	pp	P52503 (pp) Q9CQ54
10661	pp	P52503 (pp) P17665
10662	pp	P52503 (pp) Q9CPP6
10663	pp	P52503 (pp) Q99LY9
10664	pp	P52503 (pp) Q9DCS9
10665	pp	P52503 (pp) Q9D3D9
10666	pp	P52503 (pp) O08756
10667	pp	P52503 (pp) O09111
10668	pp	P52503 (pp) Q9CQ69
10669	pp	P52503 (pp) Q9Z1P6
10670	pp	Q60631 (pp) Q62277
10671	pp	Q60631 (pp) Q62420
10672	pp	Q60631 (pp) P18052
10673	pp	Q60631 (pp) P04925
10674	pp	Q60631 (pp) P20444
10675	pp	Q60631 (pp) P12023
10676	pp	Q60631 (pp) O08585
10677	pp	Q60631 (pp) P05480
10678	pp	Q60631 (pp) Q8CHC4
10679	pp	Q60631 (pp) P39053
10680	pp	Q60631 (pp) Q68FD5
10681	pp	Q62277 (pp) P60879
10682	pp	Q62277 (pp) P62204
10683	pp	Q62277 (pp) P46096
10684	pp	Q62277 (pp) P63044
10685	pp	Q62277 (pp) P01831
10686	pp	Q62277 (pp) P43006
10687	pp	P62073 (pp) P99029
10688	pp	P62073 (pp) O08756
10689	pp	P62073 (pp) Q9ERS2
10690	pp	P62073 (pp) Q925I1
10691	pp	P62073 (pp) Q9DCJ5
10692	pp	P62073 (pp) P56391
10693	pp	P62073 (pp) O35658
10694	pp	P62073 (pp) Q9CR68
10695	pp	P62073 (pp) Q9D3D9
10696	pp	P62073 (pp) Q9DCS9
10697	pp	P62073 (pp) P67778
10698	pp	P62073 (pp) Q9D6J6
10699	pp	P62073 (pp) Q9CQH3
10700	pp	P99029 (pp) Q9D6J6
10701	pp	Q9CQV8 (pp) P62259
10702	pp	Q9CQV8 (pp) P63101
10703	pp	Q9CQV8 (pp) P16054
10704	pp	Q9CQV8 (pp) Q64010
10705	pp	Q9CQV8 (pp) P10637
10706	pp	Q9CQR4 (pp) Q9CQH3
10707	pp	Q9CQR4 (pp) P97450
10708	pp	Q9CQR4 (pp) Q9D6J6
10709	pp	Q9CQR4 (pp) Q9DCD0
10710	pp	Q9CQR4 (pp) Q9CQZ6
10711	pp	Q9CQR4 (pp) Q9CQZ5
10712	pp	Q9CQR4 (pp) Q9DCJ5
10713	pp	Q9CQR4 (pp) Q99LC5
10714	pp	Q9CQR4 (pp) Q61425
10715	pp	P40142 (pp) P09411
10716	pp	P40142 (pp) Q9DCD0
10717	pp	P40142 (pp) P06745
10718	pp	P40142 (pp) Q93092
10719	pp	P40142 (pp) P16858
10720	pp	P40142 (pp) Q60597
10721	pp	P40142 (pp) P52480
10722	pp	P40142 (pp) P17751
10723	pp	P40142 (pp) P05064
10724	pp	P40142 (pp) P06151
10725	pp	P40142 (pp) P17182
10726	pp	P40142 (pp) P35486
10727	pp	P40142 (pp) Q9D0F9
10728	pp	P40142 (pp) P05063
10729	pp	P63213 (pp) P62874
10730	pp	P63213 (pp) P18872
10731	pp	P62874 (pp) P04925
10732	pp	Q99KR7 (pp) O35658
10733	pp	Q99KR7 (pp) P56480
10734	pp	O35658 (pp) P40630
10735	pp	O35658 (pp) Q9CQQ7
10736	pp	Q7TMF3 (pp) Q9DCX2
10737	pp	Q7TMF3 (pp) Q9CXZ1
10738	pp	Q7TMF3 (pp) O09111
10739	pp	Q7TMF3 (pp) Q9CR68
10740	pp	Q7TMF3 (pp) Q9CQ54
10741	pp	Q7TMF3 (pp) Q9DC69
10742	pp	Q7TMF3 (pp) Q62425
10743	pp	Q7TMF3 (pp) Q9D0M3
10744	pp	Q7TMF3 (pp) P97450
10745	pp	Q7TMF3 (pp) P52503
10746	pp	Q7TMF3 (pp) Q9D855
10747	pp	Q7TMF3 (pp) Q9DC70
10748	pp	Q7TMF3 (pp) Q9DCS9
10749	pp	Q7TMF3 (pp) Q9CQZ5
10750	pp	Q7TMF3 (pp) Q9CQQ7
10751	pp	Q7TMF3 (pp) Q9Z1P6
10752	pp	Q7TMF3 (pp) Q9DCJ5
10753	pp	Q7TMF3 (pp) Q9CQZ6
10754	pp	Q7TMF3 (pp) Q3UIU2
10755	pp	Q7TMF3 (pp) Q9ERS2
10756	pp	Q7TMF3 (pp) Q9CQJ8
10757	pp	Q7TMF3 (pp) Q9D6J5
10758	pp	Q7TMF3 (pp) Q99LY9
10759	pp	Q7TMF3 (pp) Q8K3J1
10760	pp	Q7TMF3 (pp) Q9CQC7
10761	pp	Q7TMF3 (pp) Q9CQH3
10762	pp	Q7TMF3 (pp) Q9D3D9
10763	pp	Q7TMF3 (pp) Q9D6J6
10764	pp	Q7TMF3 (pp) Q9CQ69
10765	pp	Q7TMF3 (pp) Q91YT0
10766	pp	Q7TMF3 (pp) Q91VD9
10767	pp	Q7TMF3 (pp) Q99LC3
10768	pp	Q9DCX2 (pp) Q9ERS2
10769	pp	Q9DCX2 (pp) Q99LX0
10770	pp	Q9DCX2 (pp) Q91VR2
10771	pp	Q9DCX2 (pp) Q9CQQ7
10772	pp	Q9DCX2 (pp) Q9D6J6
10773	pp	Q9DCX2 (pp) Q9CQH3
10774	pp	Q9DCX2 (pp) Q9D3D9
10775	pp	Q9DCX2 (pp) Q99LY9
10776	pp	Q61735 (pp) P97797
10777	pp	P50518 (pp) Q8BVE3
10778	pp	P50518 (pp) Q9Z1G4
10779	pp	P50518 (pp) P63082
10780	pp	P50518 (pp) P57746
10781	pp	P50518 (pp) Q9WTT4
10782	pp	P50518 (pp) Q9Z1G3
10783	pp	P50518 (pp) P50516
[truncated: 1,394 more rows]
