# Supplementary material for: APP Is a Context-Sensitive Regulator of the Hippocampal Presynaptic Active Zone
Source: PLOS journal article supplement (doi:10.1371/journal.pcbi.1004832), 2016-04-19
Supplement: S6 (10.1371/journal.pcbi.1004832.s006) [file journal.pcbi.1004832.s006.cys › CytoscapeSession-2016_01_22-10_07/tables/8147-Core+Network+Communities/SHARED_ATTRS-org.cytoscape.model.CyNode-8147+shared+node.cytable]

CyCSV-Version	1
SUID	shared name
java.lang.Long	java.lang.String
8147 shared node
8173	Q01097
8174	Q80Z38
8175	Q9CQZ5
8176	Q9D6J6
8177	O08749
8178	Q9D051
8179	Q9D3D9
8180	O09111
8181	Q03265
8182	P68510
8183	P12382
8184	P35438
8185	P05202
8186	Q9QUI0
8187	Q06335
8188	P23819
8189	P35436
8190	Q9CZU6
8191	Q9DCD0
8192	P51863
8193	Q9Z1G3
8194	P62259
8195	P47757
8196	Q8C8R3
8197	P16546
8198	P63330
8199	Q76MZ3
8200	Q9CQZ6
8201	Q9CQ54
8202	Q9DCT2
8203	Q9CQ69
8204	P08249
8205	Q9D6R2
8206	P54071
8207	P06151
8208	Q9DB20
8209	Q9CQH3
8210	Q3UHD9
8211	Q9Z2H5
8212	Q6P9K8
8213	O88952
8214	P19783
8215	Q8BK64
8216	P63038
8217	Q8BH95
8218	Q9CZ13
8219	Q9D0M3
8220	Q99LC3
8221	Q99LY9
8222	Q8BMF4
8223	Q05920
8224	P63085
8225	P61027
8226	Q61598
8227	P56480
8228	P17742
8229	P68404
8230	P67778
8231	Q9JLJ2
8232	Q91VR2
8233	Q9CPQ8
8234	Q91VD9
8235	Q9DCS9
8236	Q9CR68
8237	P52196
8238	P05132
8239	Q9CQJ8
8240	Q06185
8241	Q9DC70
8242	Q9D0S9
8243	Q9D1K2
8244	Q9Z1G4
8245	Q9WUM5
8246	Q9D0K2
8247	Q9CQN1
8248	P63037
8249	Q9DCW4
8250	Q9CPP6
8251	P15105
8252	P46460
8253	Q08331
8254	Q9CQ62
8255	P62897
8256	Q9D2G2
8257	Q3UIU2
8258	P31938
8259	P17427
8260	P17426
8261	P57746
8262	P50516
8263	P70404
8264	O88441
8265	Q7TQI3
8266	P17751
8267	P09411
8268	Q9Z1P6
8269	P63137
8270	P62812
8271	O70325
8272	P48771
8273	Q64133
8274	P47738
8275	P63005
8276	Q6PER3
8277	O70161
8278	Q9Z1B3
8279	Q921G7
8280	Q8BWT1
8281	Q9CQA3
8282	P12787
8283	Q61425
8284	Q99LC5
8285	Q8BGH2
8286	Q99LX0
8287	P62331
8288	Q8K1Z0
8289	P11499
8290	P05064
8291	P17710
8292	P48320
8293	P61922
8294	P12023
8295	P62814
8296	Q9WV92
8297	Q8R5M8
8298	O35526
8299	Q9WV18
8300	P56391
8301	Q9D172
8302	Q62442
8303	P26443
8304	Q91Z53
8305	Q99KJ8
8306	O08788
8307	Q99KI0
8308	Q9ERS2
8309	P97807
8310	Q6PHZ2
8311	P60710
8312	Q02248
8313	P05480
8314	P51881
8315	Q91WD5
8316	Q8K2B3
8317	P68369
8318	Q8VEM8
8319	Q3ULD5
8320	Q8R4N0
8321	P52503
8322	Q60631
8323	Q62277
8324	P62073
8325	P99029
8326	Q9CQV8
8327	Q9CQR4
8328	P40142
8329	P63213
8330	P62874
8331	Q9EQ20
8332	Q99KR7
8333	O35658
8334	Q7TMF3
8335	Q9DCX2
8336	Q61735
8337	P97797
8338	P50518
8339	Q8BVE3
8340	Q9JLB0
8341	Q99N28
8342	P19536
8343	Q60864
8344	Q9QYJ0
8345	Q68FD5
8346	Q9R0Q6
8347	Q9JM76
8348	Q91YT0
8349	Q9DCJ5
8350	P60879
8351	P28660
8352	O08756
8353	Q99JY0
8354	P04925
8355	P39688
8356	P49615
8357	P03930
8358	Q9CQ75
8359	P18872
8360	Q8VDD5
8361	P51174
8362	Q8JZQ2
8363	Q8JZN5
8364	Q60676
8365	Q9CXZ1
8366	Q8BG51
8367	P63001
8368	Q62351
8369	P63044
8370	P46660
8371	Q9JHU4
8372	Q9D855
8373	Q8K3J1
8374	Q9DB77
8375	Q91VM9
8376	Q9DC69
8377	Q9JJV2
8378	Q9CQQ7
8379	O88696
8380	O35129
8381	Q9CZS1
8382	P70232
8383	P18052
8384	P56379
8385	Q9D023
8386	P12367
8387	Q61548
8388	P45878
8389	P63017
8390	Q9D898
8391	Q80T41
8392	Q9R0K7
8393	P13707
8394	Q64521
8395	Q9QUH0
8396	P20108
8397	Q9JLM8
8398	Q64010
8399	P97450
8400	O88935
8401	P62823
8402	Q99PT1
8403	Q99MN9
8404	Q99JY9
8405	P14094
8406	P47754
8407	Q9CZT8
8408	P35486
8409	P22315
8410	Q61102
8411	P62962
8412	P16054
8413	P09671
8414	P18572
8415	O35465
8416	Q8BPN8
8417	P63082
8418	Q9CQ92
8419	Q8K1M6
8420	Q9DBL1
8421	P53395
8422	Q9JHI5
8423	Q93092
8424	P52480
8425	Q9DB05
8426	Q61301
8427	Q9Z2I9
8428	P50544
8429	Q61831
8430	P63040
8431	Q923T9
8432	Q920I9
8433	P06745
8434	Q3UTJ2
8435	Q7TPR4
8436	P61264
8437	P70441
8438	P26040
8439	Q9EP69
8440	Q62420
8441	P43024
8442	P14873
8443	P09103
8444	P56382
8445	Q3UMR5
8446	Q91ZA3
8447	Q61879
8448	P63101
8449	Q9QWI6
8450	Q8R001
8451	Q9DBF1
8452	Q64516
8453	Q8VDN2
8454	Q6PCP5
8455	P23506
8456	Q9D6J5
8457	Q00612
8458	Q9WTT4
8459	Q5FWK3
8460	Q8CHU3
8461	P59999
8462	Q9CVB6
8463	Q9CQC7
8464	O88737
8465	Q6PH08
8466	P39053
8467	Q6PB66
8468	P31324
8469	Q8BR92
8470	P97772
8471	Q8CHT0
8472	P29758
8473	Q99L47
8474	Q7TQF7
8475	P15116
8476	P06837
8477	P07901
8478	P61982
8479	Q9WUA3
8480	Q60597
8481	P05063
8482	Q8BKZ9
8483	Q9CPW4
8484	P17182
8485	Q8BMS1
8486	Q9Z268
8487	Q8BGD5
8488	P42125
8489	Q61290
8490	Q8R0S4
8491	P08226
8492	Q91ZX7
8493	Q8BLK3
8494	P62835
8495	Q6R891
8496	P60766
8497	Q99104
8498	Q62048
8499	Q9D6M3
8500	P47857
8501	P68368
8502	Q922R8
8503	P10637
8504	P55088
8505	Q9DBG3
8506	Q6IRU5
8507	P17183
8508	Q9QXS6
8509	Q8BHL5
8510	O88712
8511	Q9DCB8
8512	Q9Z1J3
8513	Q8BMF3
8514	Q62425
8515	P38647
8516	P63011
8517	Q60598
8518	P61161
8519	Q9Z0X1
8520	Q8VDP6
8521	Q99L43
8522	Q8CAQ8
8523	Q9JLZ3
8524	P17665
8525	Q60931
8526	Q8QZT1
8527	Q8VD37
8528	P16858
8529	P62746
8530	P11627
8531	P13595
8532	Q8BKX1
8533	O70589
8534	P16330
8535	P03995
8536	P99024
8537	Q9Z218
8538	P84091
8539	Q9QXJ1
8540	P68033
8541	Q9R0Y5
8542	P47802
8543	Q6PIE5
8544	P70414
8545	P28652
8546	Q99K85
8547	P17156
8548	P62204
8549	P68254
8550	Q9DBJ1
8551	P23818
8552	Q68FF6
8553	P30999
8554	P62482
8555	Q60996
8556	Q9R0N7
8557	Q62261
8558	Q925I1
8559	P48453
8560	Q4ACU6
8561	Q8BYM5
8562	Q9JIS5
8563	P40630
8564	Q9CS84
8565	O08539
8566	O70318
8567	Q64332
8568	P60761
8569	P00493
8570	Q9Z0R4
8571	Q80Y14
8572	Q5SQX6
8573	Q9CPQ1
8574	Q3UHL1
8575	Q60932
8576	O08585
8577	Q9QYR6
8578	B9EKR1
8579	O54991
8580	P45376
8581	Q62419
8582	P60469
8583	Q91ZJ5
8584	P63328
8585	O55042
8586	P28667
8587	Q9D8B3
8588	P01831
8589	P20357
8590	Q3UVX5
8591	Q91WC3
8592	Q8BWF0
8593	Q8BH04
8594	Q99MR8
8595	Q99PJ0
8596	Q9D6F9
8597	P41216
8598	Q6P1F6
8599	P28663
8600	P68181
8601	Q80VP1
8602	Q6PIC6
8603	Q9R111
8604	Q9D0F9
8605	Q62465
8606	Q9WUB3
8607	Q91VZ6
8608	Q8CHC4
8609	Q61411
8610	Q60875
8611	O55023
8612	Q80UU9
8613	Q9R0P9
8614	P0C0A3
8615	Q9WU78
8616	P50396
8617	P62821
8618	Q9CQI6
8619	Q9CRB9
8620	P35279
8621	Q9DC28
8622	Q8VBV7
8623	P47708
8624	Q60605
8625	P22723
8626	P62743
8627	P19246
8628	Q80U28
8629	Q61553
8630	Q810U3
8631	P67871
8632	Q8R3V5
8633	P58281
8634	P27546
8635	P63318
8636	P70296
8637	P56564
8638	P00405
8639	Q9EPJ9
8640	Q5DQR4
8641	O35239
8642	Q8BW75
8643	O08599
8644	Q9QXS1
8645	P20444
8646	Q60930
8647	Q99P72
8648	O35643
8649	Q8R191
8650	P61164
8651	O55100
8652	Q5RJI5
8653	Q8BZ98
8654	Q61644
8655	P19096
8656	P35564
8657	Q9CZ42
8658	Q61490
8659	P46096
8660	Q922H2
8661	P28740
8662	Q9CWZ7
8663	O35857
8664	Q9D880
8665	P43406
8666	Q71LX4
8667	P48962
8668	Q8CI94
8669	Q8K021
8670	P63321
8671	P48722
8672	O35143
8673	P84096
8674	P26645
8675	P28661
8676	P42208
8677	Q9WV34
8678	Q9Z2Q6
8679	Q9Z2I0
8680	P18760
8681	P40124
8682	O54983
8683	Q8VDQ8
8684	P08551
8685	Q8K4Z3
8686	P08553
8687	Q61699
8688	P12960
8689	Q7TSJ2
8690	O35136
8691	O55131
8692	Q9WV55
8693	Q7TMB8
8694	Q80TZ3
8695	O88643
8696	Q8BIJ6
8697	P55302
8698	Q91XV3
8699	P48758
8700	Q9R1V6
8701	P23242
8702	Q9QY76
8703	P57780
8704	Q9CR16
8705	Q99NE5
8706	Q8K183
8707	P11798
8708	P48036
8709	Q9D1T0
8710	Q61316
8711	O08917
8712	Q60634
8713	P97300
8714	Q8CHH9
8715	Q9CR62
8716	Q91VR7
8717	Q68FH0
8718	Q7TMM9
8719	Q2PFD7
8720	Q920P5
8721	Q3THE2
8722	Q61151
8723	Q91VT4
8724	Q78IK2
8725	Q8R5C5
8726	Q03157
8727	Q8CGK3
8728	Q3ULJ0
8729	Q61206
8730	Q9QYA2
8731	Q8R366
8732	F6SEU4
8733	Q921M7
8734	Q8BH59
8735	Q8BRT1
8736	P20152
8737	Q9CZW5
8738	Q6P9K9
8739	Q9CQW1
8740	Q921J2
8741	Q9ERD7
8742	P43006
8743	Q80XN0
8744	Q9CWS0
8745	Q8K0T0
8746	P13020
8747	Q61330
8748	Q63810
8749	Q9Z2W9
8750	Q04447
8751	Q9Z0P4
8752	Q9D8Y0
8753	Q9CYT6
8754	Q99KB8
8755	Q9D6K5
8756	Q6URW6
8757	Q9R1V7
8758	Q9ES97
8759	D3YVF0
8760	Q810U4
8761	A2CG49
8762	P53994
8763	O89053
8764	Q9JIA1
8765	Q91WS0
8766	Q8K400
8767	Q91ZZ3
8768	Q9QZF2
8769	Q812A2
8770	Q9Z0E0
8771	Q4KMM3
8772	Q9CR95
8773	Q60737
8774	P80560
8775	P35802
8776	Q9EQZ6
8777	P23927
8778	Q9QYX7
8779	Q03137
8780	P58771
8781	Q8VHW2
8782	O54774
8783	Q9DB73
8784	O88342
8785	Q9R0P5
8786	Q9R1V4
8787	Q00493
