# Supplementary material for: APP Is a Context-Sensitive Regulator of the Hippocampal Presynaptic Active Zone
Source: PLOS journal article supplement (doi:10.1371/journal.pcbi.1004832), 2016-04-19
Supplement: S6 (10.1371/journal.pcbi.1004832.s006) [file journal.pcbi.1004832.s006.cys › CytoscapeSession-2016_01_22-10_07/tables/8163-Communities/HIDDEN-org.cytoscape.model.CyEdge-8163+hidden+edge.cytable]

"CyCSV-Version","1"
"SUID"
"java.lang.Long"
""
"8163 hidden edge",""
"8788"
"8789"
"8790"
"8791"
"8792"
"8793"
"8794"
"8795"
"8796"
"8797"
"8798"
"8799"
"8800"
"8801"
"8802"
"8803"
"8804"
"8805"
"8806"
"8807"
"8808"
"8809"
"8810"
"8811"
"8812"
"8813"
"8814"
"8815"
"8816"
"8817"
"8818"
"8819"
"8820"
"8821"
"8822"
"8823"
"8824"
"8825"
"8826"
"8827"
"8828"
"8829"
"8830"
"8831"
"8832"
"8833"
"8834"
"8835"
"8836"
"8837"
"8838"
"8839"
"8840"
"8841"
"8842"
"8843"
"8844"
"8845"
"8846"
"8847"
"8848"
"8849"
"8850"
"8851"
"8852"
"8853"
"8854"
"8855"
"8856"
"8857"
"8858"
"8859"
"8860"
"8861"
"8862"
"8863"
"8864"
"8865"
"8866"
"8867"
"8868"
"8869"
"8870"
"8871"
"8872"
"8873"
"8874"
"8875"
"8876"
"8877"
"8878"
"8879"
"8880"
"8881"
"8882"
"8883"
"8884"
"8885"
"8886"
"8887"
"8888"
"8889"
"8890"
"8891"
"8892"
"8893"
"8894"
"8895"
"8896"
"8897"
"8898"
"8899"
"8900"
"8901"
"8902"
"8903"
"8904"
"8905"
"8906"
"8907"
"8908"
"8909"
"8910"
"8911"
"8912"
"8913"
"8914"
"8915"
"8916"
"8917"
"8918"
"8919"
"8920"
"8921"
"8922"
"8923"
"8924"
"8925"
"8926"
"8927"
"8928"
"8929"
"8930"
"8931"
"8932"
"8933"
"8934"
"8935"
"8936"
"8937"
"8938"
"8939"
"8940"
"8941"
"8942"
"8943"
"8944"
"8945"
"8946"
"8947"
"8948"
"8949"
"8950"
"8951"
"8952"
"8953"
"8954"
"8955"
"8956"
"8957"
"8958"
"8959"
"8960"
"8961"
"8962"
"8963"
"8964"
"8965"
"8966"
"8967"
"8968"
"8969"
"8970"
"8971"
"8972"
"8973"
"8974"
"8975"
"8976"
"8977"
"8978"
"8979"
"8980"
"8981"
"8982"
"8983"
"8984"
"8985"
"8986"
"8987"
"8988"
"8989"
"8990"
"8991"
"8992"
"8993"
"8994"
"8995"
"8996"
"8997"
"8998"
"8999"
"9000"
"9001"
"9002"
"9003"
"9004"
"9005"
"9006"
"9007"
"9008"
"9009"
"9010"
"9011"
"9012"
"9013"
"9014"
"9015"
"9016"
"9017"
"9018"
"9019"
"9020"
"9021"
"9022"
"9023"
"9024"
"9025"
"9026"
"9027"
"9028"
"9029"
"9030"
"9031"
"9032"
"9033"
"9034"
"9035"
"9036"
"9037"
"9038"
"9039"
"9040"
"9041"
"9042"
"9043"
"9044"
"9045"
"9046"
"9047"
"9048"
"9049"
"9050"
"9051"
"9052"
"9053"
"9054"
"9055"
"9056"
"9057"
"9058"
"9059"
"9060"
"9061"
"9062"
"9063"
"9064"
"9065"
"9066"
"9067"
"9068"
"9069"
"9070"
"9071"
"9072"
"9073"
"9074"
"9075"
"9076"
"9077"
"9078"
"9079"
"9080"
"9081"
"9082"
"9083"
"9084"
"9085"
"9086"
"9087"
"9088"
"9089"
"9090"
"9091"
"9092"
"9093"
"9094"
"9095"
"9096"
"9097"
"9098"
"9099"
"9100"
"9101"
"9102"
"9103"
"9104"
"9105"
"9106"
"9107"
"9108"
"9109"
"9110"
"9111"
"9112"
"9113"
"9114"
"9115"
"9116"
"9117"
"9118"
"9119"
"9120"
"9121"
"9122"
"9123"
"9124"
"9125"
"9126"
"9127"
"9128"
"9129"
"9130"
"9131"
"9132"
"9133"
"9134"
"9135"
"9136"
"9137"
"9138"
"9139"
"9140"
"9141"
"9142"
"9143"
"9144"
"9145"
"9146"
"9147"
"9148"
"9149"
"9150"
"9151"
"9152"
"9153"
"9154"
"9155"
"9156"
"9157"
"9158"
"9159"
"9160"
"9161"
"9162"
"9163"
"9164"
"9165"
"9166"
"9167"
"9168"
"9169"
"9170"
"9171"
"9172"
"9173"
"9174"
"9175"
"9176"
"9177"
"9178"
"9179"
"9180"
"9181"
"9182"
"9183"
"9184"
"9185"
"9186"
"9187"
"9188"
"9189"
"9190"
"9191"
"9192"
"9193"
"9194"
"9195"
"9196"
"9197"
"9198"
"9199"
"9200"
"9201"
"9202"
"9203"
"9204"
"9205"
"9206"
"9207"
"9208"
"9209"
"9210"
"9211"
"9212"
"9213"
"9214"
"9215"
"9216"
"9217"
"9218"
"9219"
"9220"
"9221"
"9222"
"9223"
"9224"
"9225"
"9226"
"9227"
"9228"
"9229"
"9230"
"9231"
"9232"
"9233"
"9234"
"9235"
"9236"
"9237"
"9238"
"9239"
"9240"
"9241"
"9242"
"9243"
"9244"
"9245"
"9246"
"9247"
"9248"
"9249"
"9250"
"9251"
"9252"
"9253"
"9254"
"9255"
"9256"
"9257"
"9258"
"9259"
"9260"
"9261"
"9262"
"9263"
"9264"
"9265"
"9266"
"9267"
"9268"
"9269"
"9270"
"9271"
"9272"
"9273"
"9274"
"9275"
"9276"
"9277"
"9278"
"9279"
"9280"
"9281"
"9282"
"9283"
"9284"
"9285"
"9286"
"9287"
"9288"
"9289"
"9290"
"9291"
"9292"
"9293"
"9294"
"9295"
"9296"
"9297"
"9298"
"9299"
"9300"
"9301"
"9302"
"9303"
"9304"
"9305"
"9306"
"9307"
"9308"
"9309"
"9310"
"9311"
"9312"
"9313"
"9314"
"9315"
"9316"
"9317"
"9318"
"9319"
"9320"
"9321"
"9322"
"9323"
"9324"
"9325"
"9326"
"9327"
"9328"
"9329"
"9330"
"9331"
"9332"
"9333"
"9334"
"9335"
"9336"
"9337"
"9338"
"9339"
"9340"
"9341"
"9342"
"9343"
"9344"
"9345"
"9346"
"9347"
"9348"
"9349"
"9350"
"9351"
"9352"
"9353"
"9354"
"9355"
"9356"
"9357"
"9358"
"9359"
"9360"
"9361"
"9362"
"9363"
"9364"
"9365"
"9366"
"9367"
"9368"
"9369"
"9370"
"9371"
"9372"
"9373"
"9374"
"9375"
"9376"
"9377"
"9378"
"9379"
"9380"
"9381"
"9382"
"9383"
"9384"
"9385"
"9386"
"9387"
"9388"
"9389"
"9390"
"9391"
"9392"
"9393"
"9394"
"9395"
"9396"
"9397"
"9398"
"9399"
"9400"
"9401"
"9402"
"9403"
"9404"
"9405"
"9406"
"9407"
"9408"
"9409"
"9410"
"9411"
"9412"
"9413"
"9414"
"9415"
"9416"
"9417"
"9418"
"9419"
"9420"
"9421"
"9422"
"9423"
"9424"
"9425"
"9426"
"9427"
"9428"
"9429"
"9430"
"9431"
"9432"
"9433"
"9434"
"9435"
"9436"
"9437"
"9438"
"9439"
"9440"
"9441"
"9442"
"9443"
"9444"
"9445"
"9446"
"9447"
"9448"
"9449"
"9450"
"9451"
"9452"
"9453"
"9454"
"9455"
"9456"
"9457"
"9458"
"9459"
"9460"
"9461"
"9462"
"9463"
"9464"
"9465"
"9466"
"9467"
"9468"
"9469"
"9470"
"9471"
"9472"
"9473"
"9474"
"9475"
"9476"
"9477"
"9478"
"9479"
"9480"
"9481"
"9482"
"9483"
"9484"
"9485"
"9486"
"9487"
"9488"
"9489"
"9490"
"9491"
"9492"
"9493"
"9494"
"9495"
"9496"
"9497"
"9498"
"9499"
"9500"
"9501"
"9502"
"9503"
"9504"
"9505"
"9506"
"9507"
"9508"
"9509"
"9510"
"9511"
"9512"
"9513"
"9514"
"9515"
"9516"
"9517"
"9518"
"9519"
"9520"
"9521"
"9522"
"9523"
"9524"
"9525"
"9526"
"9527"
"9528"
"9529"
"9530"
"9531"
"9532"
"9533"
"9534"
"9535"
"9536"
"9537"
"9538"
"9539"
"9540"
"9541"
"9542"
"9543"
"9544"
"9545"
"9546"
"9547"
"9548"
"9549"
"9550"
"9551"
"9552"
"9553"
"9554"
"9555"
"9556"
"9557"
"9558"
"9559"
"9560"
"9561"
"9562"
"9563"
"9564"
"9565"
"9566"
"9567"
"9568"
"9569"
"9570"
"9571"
"9572"
"9573"
"9574"
"9575"
"9576"
"9577"
"9578"
"9579"
"9580"
"9581"
"9582"
"9583"
"9584"
"9585"
"9586"
"9587"
"9588"
"9589"
"9590"
"9591"
"9592"
"9593"
"9594"
"9595"
"9596"
"9597"
"9598"
"9599"
"9600"
"9601"
"9602"
"9603"
"9604"
"9605"
"9606"
"9607"
"9608"
"9609"
"9610"
"9611"
"9612"
"9613"
"9614"
"9615"
"9616"
"9617"
"9618"
"9619"
"9620"
"9621"
"9622"
"9623"
"9624"
"9625"
"9626"
"9627"
"9628"
"9629"
"9630"
"9631"
"9632"
"9633"
"9634"
"9635"
"9636"
"9637"
"9638"
"9639"
"9640"
"9641"
"9642"
"9643"
"9644"
"9645"
"9646"
"9647"
"9648"
"9649"
"9650"
"9651"
"9652"
"9653"
"9654"
"9655"
"9656"
"9657"
"9658"
"9659"
"9660"
"9661"
"9662"
"9663"
"9664"
"9665"
"9666"
"9667"
"9668"
"9669"
"9670"
"9671"
"9672"
"9673"
"9674"
"9675"
"9676"
"9677"
"9678"
"9679"
"9680"
"9681"
"9682"
"9683"
"9684"
"9685"
"9686"
"9687"
"9688"
"9689"
"9690"
"9691"
"9692"
"9693"
"9694"
"9695"
"9696"
"9697"
"9698"
"9699"
"9700"
"9701"
"9702"
"9703"
"9704"
"9705"
"9706"
"9707"
"9708"
"9709"
"9710"
"9711"
"9712"
"9713"
"9714"
"9715"
"9716"
"9717"
"9718"
"9719"
"9720"
"9721"
"9722"
"9723"
"9724"
"9725"
"9726"
"9727"
"9728"
"9729"
"9730"
"9731"
"9732"
"9733"
"9734"
"9735"
"9736"
"9737"
"9738"
"9739"
"9740"
"9741"
"9742"
"9743"
"9744"
"9745"
"9746"
"9747"
"9748"
"9749"
"9750"
"9751"
"9752"
"9753"
"9754"
"9755"
"9756"
"9757"
"9758"
"9759"
"9760"
"9761"
"9762"
"9763"
"9764"
"9765"
"9766"
"9767"
"9768"
"9769"
"9770"
"9771"
"9772"
"9773"
"9774"
"9775"
"9776"
"9777"
"9778"
"9779"
"9780"
"9781"
"9782"
"9783"
"9784"
"9785"
"9786"
"9787"
"9788"
"9789"
"9790"
"9791"
"9792"
"9793"
"9794"
"9795"
"9796"
"9797"
"9798"
"9799"
"9800"
"9801"
"9802"
"9803"
"9804"
"9805"
"9806"
"9807"
"9808"
"9809"
"9810"
"9811"
"9812"
"9813"
"9814"
"9815"
"9816"
"9817"
"9818"
"9819"
"9820"
"9821"
"9822"
"9823"
"9824"
"9825"
"9826"
"9827"
"9828"
"9829"
"9830"
"9831"
"9832"
"9833"
"9834"
"9835"
"9836"
"9837"
"9838"
"9839"
"9840"
"9841"
"9842"
"9843"
"9844"
"9845"
"9846"
"9847"
"9848"
"9849"
"9850"
"9851"
"9852"
"9853"
"9854"
"9855"
"9856"
"9857"
"9858"
"9859"
"9860"
"9861"
"9862"
"9863"
"9864"
"9865"
"9866"
"9867"
"9868"
"9869"
"9870"
"9871"
"9872"
"9873"
"9874"
"9875"
"9876"
"9877"
"9878"
"9879"
"9880"
"9881"
"9882"
"9883"
"9884"
"9885"
"9886"
"9887"
"9888"
"9889"
"9890"
"9891"
"9892"
"9893"
"9894"
"9895"
"9896"
"9897"
"9898"
"9899"
"9900"
"9901"
"9902"
"9903"
"9904"
"9905"
"9906"
"9907"
"9908"
"9909"
"9910"
"9911"
"9912"
"9913"
"9914"
"9915"
"9916"
"9917"
"9918"
"9919"
"9920"
"9921"
"9922"
"9923"
"9924"
"9925"
"9926"
"9927"
"9928"
"9929"
"9930"
"9931"
"9932"
"9933"
"9934"
"9935"
"9936"
"9937"
"9938"
"9939"
"9940"
"9941"
"9942"
"9943"
"9944"
"9945"
"9946"
"9947"
"9948"
"9949"
"9950"
"9951"
"9952"
"9953"
"9954"
"9955"
"9956"
"9957"
"9958"
"9959"
"9960"
"9961"
"9962"
"9963"
"9964"
"9965"
"9966"
"9967"
"9968"
"9969"
"9970"
"9971"
"9972"
"9973"
"9974"
"9975"
"9976"
"9977"
"9978"
"9979"
"9980"
"9981"
"9982"
"9983"
"9984"
"9985"
"9986"
"9987"
"9988"
"9989"
"9990"
"9991"
"9992"
"9993"
"9994"
"9995"
"9996"
"9997"
"9998"
"9999"
"10000"
"10001"
"10002"
"10003"
"10004"
"10005"
"10006"
"10007"
"10008"
"10009"
"10010"
"10011"
"10012"
"10013"
"10014"
"10015"
"10016"
"10017"
"10018"
"10019"
"10020"
"10021"
"10022"
"10023"
"10024"
"10025"
"10026"
"10027"
"10028"
"10029"
"10030"
"10031"
"10032"
"10033"
"10034"
"10035"
"10036"
"10037"
"10038"
"10039"
"10040"
"10041"
"10042"
"10043"
"10044"
"10045"
"10046"
"10047"
"10048"
"10049"
"10050"
"10051"
"10052"
"10053"
"10054"
"10055"
"10056"
"10057"
"10058"
"10059"
"10060"
"10061"
"10062"
"10063"
"10064"
"10065"
"10066"
"10067"
"10068"
"10069"
"10070"
"10071"
"10072"
"10073"
"10074"
"10075"
"10076"
"10077"
"10078"
"10079"
"10080"
"10081"
"10082"
"10083"
"10084"
"10085"
"10086"
"10087"
"10088"
"10089"
"10090"
"10091"
"10092"
"10093"
"10094"
"10095"
"10096"
"10097"
"10098"
"10099"
"10100"
"10101"
"10102"
"10103"
"10104"
"10105"
"10106"
"10107"
"10108"
"10109"
"10110"
"10111"
"10112"
"10113"
"10114"
"10115"
"10116"
"10117"
"10118"
"10119"
"10120"
"10121"
"10122"
"10123"
"10124"
"10125"
"10126"
"10127"
"10128"
"10129"
"10130"
"10131"
"10132"
"10133"
"10134"
"10135"
"10136"
"10137"
"10138"
"10139"
"10140"
"10141"
"10142"
"10143"
"10144"
"10145"
"10146"
"10147"
"10148"
"10149"
"10150"
"10151"
"10152"
"10153"
"10154"
"10155"
"10156"
"10157"
"10158"
"10159"
"10160"
"10161"
"10162"
"10163"
"10164"
"10165"
"10166"
"10167"
"10168"
"10169"
"10170"
"10171"
"10172"
"10173"
"10174"
"10175"
"10176"
"10177"
"10178"
"10179"
"10180"
"10181"
"10182"
"10183"
"10184"
"10185"
"10186"
"10187"
"10188"
"10189"
"10190"
"10191"
"10192"
"10193"
"10194"
"10195"
"10196"
"10197"
"10198"
"10199"
"10200"
"10201"
"10202"
"10203"
"10204"
"10205"
"10206"
"10207"
"10208"
"10209"
"10210"
"10211"
"10212"
"10213"
"10214"
"10215"
"10216"
"10217"
"10218"
"10219"
"10220"
"10221"
"10222"
"10223"
"10224"
"10225"
"10226"
"10227"
"10228"
"10229"
"10230"
"10231"
"10232"
"10233"
"10234"
"10235"
"10236"
"10237"
"10238"
"10239"
"10240"
"10241"
"10242"
"10243"
"10244"
"10245"
"10246"
"10247"
"10248"
"10249"
"10250"
"10251"
"10252"
"10253"
"10254"
"10255"
"10256"
"10257"
"10258"
"10259"
"10260"
"10261"
"10262"
"10263"
"10264"
"10265"
"10266"
"10267"
"10268"
"10269"
"10270"
"10271"
"10272"
"10273"
"10274"
"10275"
"10276"
"10277"
"10278"
"10279"
"10280"
"10281"
"10282"
"10283"
"10284"
"10285"
"10286"
"10287"
"10288"
"10289"
"10290"
"10291"
"10292"
"10293"
"10294"
"10295"
"10296"
"10297"
"10298"
"10299"
"10300"
"10301"
"10302"
"10303"
"10304"
"10305"
"10306"
"10307"
"10308"
"10309"
"10310"
"10311"
"10312"
"10313"
"10314"
"10315"
"10316"
"10317"
"10318"
"10319"
"10320"
"10321"
"10322"
"10323"
"10324"
"10325"
"10326"
"10327"
"10328"
"10329"
"10330"
"10331"
"10332"
"10333"
"10334"
"10335"
"10336"
"10337"
"10338"
"10339"
"10340"
"10341"
"10342"
"10343"
"10344"
"10345"
"10346"
"10347"
"10348"
"10349"
"10350"
"10351"
"10352"
"10353"
"10354"
"10355"
"10356"
"10357"
"10358"
"10359"
"10360"
"10361"
"10362"
"10363"
"10364"
"10365"
"10366"
"10367"
"10368"
"10369"
"10370"
"10371"
"10372"
"10373"
"10374"
"10375"
"10376"
"10377"
"10378"
"10379"
"10380"
"10381"
"10382"
"10383"
"10384"
"10385"
"10386"
"10387"
"10388"
"10389"
"10390"
"10391"
"10392"
"10393"
"10394"
"10395"
"10396"
"10397"
"10398"
"10399"
"10400"
"10401"
"10402"
"10403"
"10404"
"10405"
"10406"
"10407"
"10408"
"10409"
"10410"
"10411"
"10412"
"10413"
"10414"
"10415"
"10416"
"10417"
"10418"
"10419"
"10420"
"10421"
"10422"
"10423"
"10424"
"10425"
"10426"
"10427"
"10428"
"10429"
"10430"
"10431"
"10432"
"10433"
"10434"
"10435"
"10436"
"10437"
"10438"
"10439"
"10440"
"10441"
"10442"
"10443"
"10444"
"10445"
"10446"
"10447"
"10448"
"10449"
"10450"
"10451"
"10452"
"10453"
"10454"
"10455"
"10456"
"10457"
"10458"
"10459"
"10460"
"10461"
"10462"
"10463"
"10464"
"10465"
"10466"
"10467"
"10468"
"10469"
"10470"
"10471"
"10472"
"10473"
"10474"
"10475"
"10476"
"10477"
"10478"
"10479"
"10480"
"10481"
"10482"
"10483"
"10484"
"10485"
"10486"
"10487"
"10488"
"10489"
"10490"
"10491"
"10492"
"10493"
"10494"
"10495"
"10496"
"10497"
"10498"
"10499"
"10500"
"10501"
"10502"
"10503"
"10504"
"10505"
"10506"
"10507"
"10508"
"10509"
"10510"
"10511"
"10512"
"10513"
"10514"
"10515"
"10516"
"10517"
"10518"
"10519"
"10520"
"10521"
"10522"
"10523"
"10524"
"10525"
"10526"
"10527"
"10528"
"10529"
"10530"
"10531"
"10532"
"10533"
"10534"
"10535"
"10536"
"10537"
"10538"
"10539"
"10540"
"10541"
"10542"
"10543"
"10544"
"10545"
"10546"
"10547"
"10548"
"10549"
"10550"
"10551"
"10552"
"10553"
"10554"
"10555"
"10556"
"10557"
"10558"
"10559"
"10560"
"10561"
"10562"
"10563"
"10564"
"10565"
"10566"
"10567"
"10568"
"10569"
"10570"
"10571"
"10572"
"10573"
"10574"
"10575"
"10576"
"10577"
"10578"
"10579"
"10580"
"10581"
"10582"
"10583"
"10584"
"10585"
"10586"
"10587"
"10588"
"10589"
"10590"
"10591"
"10592"
"10593"
"10594"
"10595"
"10596"
"10597"
"10598"
"10599"
"10600"
"10601"
"10602"
"10603"
"10604"
"10605"
"10606"
"10607"
"10608"
"10609"
"10610"
"10611"
"10612"
"10613"
"10614"
"10615"
"10616"
"10617"
"10618"
"10619"
"10620"
"10621"
"10622"
"10623"
"10624"
"10625"
"10626"
"10627"
"10628"
"10629"
"10630"
"10631"
"10632"
"10633"
"10634"
"10635"
"10636"
"10637"
"10638"
"10639"
"10640"
"10641"
"10642"
"10643"
"10644"
"10645"
"10646"
"10647"
"10648"
"10649"
"10650"
"10651"
"10652"
"10653"
"10654"
"10655"
"10656"
"10657"
"10658"
"10659"
"10660"
"10661"
"10662"
"10663"
"10664"
"10665"
"10666"
"10667"
"10668"
"10669"
"10670"
"10671"
"10672"
"10673"
"10674"
"10675"
"10676"
"10677"
"10678"
"10679"
"10680"
"10681"
"10682"
"10683"
"10684"
"10685"
"10686"
"10687"
"10688"
"10689"
"10690"
"10691"
"10692"
"10693"
"10694"
"10695"
"10696"
"10697"
"10698"
"10699"
"10700"
"10701"
"10702"
"10703"
"10704"
"10705"
"10706"
"10707"
"10708"
"10709"
"10710"
"10711"
"10712"
"10713"
"10714"
"10715"
"10716"
"10717"
"10718"
"10719"
"10720"
"10721"
"10722"
"10723"
"10724"
"10725"
"10726"
"10727"
"10728"
"10729"
"10730"
"10731"
"10732"
"10733"
"10734"
"10735"
"10736"
"10737"
"10738"
"10739"
"10740"
"10741"
"10742"
"10743"
"10744"
"10745"
"10746"
"10747"
"10748"
"10749"
"10750"
"10751"
"10752"
"10753"
"10754"
"10755"
"10756"
"10757"
"10758"
"10759"
"10760"
"10761"
"10762"
"10763"
"10764"
"10765"
"10766"
"10767"
"10768"
"10769"
"10770"
"10771"
"10772"
"10773"
"10774"
"10775"
"10776"
"10777"
"10778"
"10779"
"10780"
"10781"
"10782"
"10783"
"10784"
"10785"
"10786"
"10787"
"10788"
"10789"
"10790"
"10791"
"10792"
"10793"
"10794"
"10795"
"10796"
"10797"
"10798"
"10799"
"10800"
"10801"
"10802"
"10803"
"10804"
"10805"
"10806"
"10807"
"10808"
"10809"
"10810"
"10811"
"10812"
"10813"
"10814"
"10815"
"10816"
"10817"
"10818"
"10819"
"10820"
"10821"
"10822"
"10823"
"10824"
"10825"
"10826"
"10827"
"10828"
"10829"
"10830"
"10831"
"10832"
"10833"
"10834"
"10835"
"10836"
"10837"
"10838"
"10839"
"10840"
"10841"
"10842"
"10843"
"10844"
"10845"
"10846"
"10847"
"10848"
"10849"
"10850"
"10851"
"10852"
"10853"
"10854"
"10855"
"10856"
"10857"
"10858"
"10859"
"10860"
"10861"
"10862"
"10863"
"10864"
"10865"
"10866"
"10867"
"10868"
"10869"
"10870"
"10871"
"10872"
"10873"
"10874"
"10875"
"10876"
"10877"
"10878"
"10879"
"10880"
"10881"
"10882"
"10883"
"10884"
"10885"
"10886"
"10887"
"10888"
"10889"
"10890"
"10891"
"10892"
"10893"
"10894"
"10895"
"10896"
"10897"
"10898"
"10899"
"10900"
"10901"
"10902"
"10903"
"10904"
"10905"
"10906"
"10907"
"10908"
"10909"
"10910"
"10911"
"10912"
"10913"
"10914"
"10915"
"10916"
"10917"
"10918"
"10919"
"10920"
"10921"
"10922"
"10923"
"10924"
"10925"
"10926"
"10927"
"10928"
"10929"
"10930"
"10931"
"10932"
"10933"
"10934"
"10935"
"10936"
"10937"
"10938"
"10939"
"10940"
"10941"
"10942"
"10943"
"10944"
"10945"
"10946"
"10947"
"10948"
"10949"
"10950"
"10951"
"10952"
"10953"
"10954"
"10955"
"10956"
"10957"
"10958"
"10959"
"10960"
"10961"
"10962"
"10963"
"10964"
"10965"
"10966"
"10967"
"10968"
"10969"
"10970"
"10971"
"10972"
"10973"
"10974"
"10975"
"10976"
"10977"
"10978"
"10979"
"10980"
"10981"
"10982"
"10983"
"10984"
"10985"
"10986"
"10987"
"10988"
"10989"
"10990"
"10991"
"10992"
"10993"
"10994"
"10995"
"10996"
"10997"
"10998"
"10999"
"11000"
"11001"
"11002"
"11003"
"11004"
"11005"
"11006"
"11007"
"11008"
"11009"
"11010"
"11011"
"11012"
"11013"
"11014"
"11015"
"11016"
"11017"
"11018"
"11019"
"11020"
"11021"
"11022"
"11023"
"11024"
"11025"
"11026"
"11027"
"11028"
"11029"
"11030"
"11031"
"11032"
"11033"
"11034"
"11035"
"11036"
"11037"
"11038"
"11039"
"11040"
"11041"
"11042"
"11043"
"11044"
"11045"
"11046"
"11047"
"11048"
"11049"
"11050"
"11051"
"11052"
"11053"
"11054"
"11055"
"11056"
"11057"
"11058"
"11059"
"11060"
"11061"
"11062"
"11063"
"11064"
"11065"
"11066"
"11067"
"11068"
"11069"
"11070"
"11071"
"11072"
"11073"
"11074"
"11075"
"11076"
"11077"
"11078"
"11079"
"11080"
"11081"
"11082"
"11083"
"11084"
"11085"
"11086"
"11087"
"11088"
"11089"
"11090"
"11091"
"11092"
"11093"
"11094"
"11095"
"11096"
"11097"
"11098"
"11099"
"11100"
"11101"
"11102"
"11103"
"11104"
"11105"
"11106"
"11107"
"11108"
"11109"
"11110"
"11111"
"11112"
"11113"
"11114"
"11115"
"11116"
"11117"
"11118"
"11119"
"11120"
"11121"
"11122"
"11123"
"11124"
"11125"
"11126"
"11127"
"11128"
"11129"
"11130"
"11131"
"11132"
"11133"
"11134"
"11135"
"11136"
"11137"
"11138"
"11139"
"11140"
"11141"
"11142"
"11143"
"11144"
"11145"
"11146"
"11147"
"11148"
"11149"
"11150"
"11151"
"11152"
"11153"
"11154"
"11155"
"11156"
"11157"
"11158"
"11159"
"11160"
"11161"
"11162"
"11163"
"11164"
"11165"
"11166"
"11167"
"11168"
"11169"
"11170"
"11171"
"11172"
"11173"
"11174"
"11175"
"11176"
"11177"
"11178"
"11179"
"11180"
"11181"
"11182"
"11183"
"11184"
"11185"
"11186"
"11187"
"11188"
"11189"
"11190"
"11191"
"11192"
"11193"
"11194"
"11195"
"11196"
"11197"
"11198"
"11199"
"11200"
"11201"
"11202"
"11203"
"11204"
"11205"
"11206"
"11207"
"11208"
"11209"
"11210"
"11211"
"11212"
"11213"
"11214"
"11215"
"11216"
"11217"
"11218"
"11219"
"11220"
"11221"
"11222"
"11223"
"11224"
"11225"
"11226"
"11227"
"11228"
"11229"
"11230"
"11231"
"11232"
"11233"
"11234"
"11235"
"11236"
"11237"
"11238"
"11239"
"11240"
"11241"
"11242"
"11243"
"11244"
"11245"
"11246"
"11247"
"11248"
"11249"
"11250"
"11251"
"11252"
"11253"
"11254"
"11255"
"11256"
"11257"
"11258"
"11259"
"11260"
"11261"
"11262"
"11263"
"11264"
"11265"
"11266"
"11267"
"11268"
"11269"
"11270"
"11271"
"11272"
"11273"
"11274"
"11275"
"11276"
"11277"
"11278"
"11279"
"11280"
"11281"
"11282"
"11283"
"11284"
"11285"
"11286"
"11287"
"11288"
"11289"
"11290"
"11291"
"11292"
"11293"
"11294"
"11295"
"11296"
"11297"
"11298"
"11299"
"11300"
"11301"
"11302"
"11303"
"11304"
"11305"
"11306"
"11307"
"11308"
"11309"
"11310"
"11311"
"11312"
"11313"
"11314"
"11315"
"11316"
"11317"
"11318"
"11319"
"11320"
"11321"
"11322"
"11323"
"11324"
"11325"
"11326"
"11327"
"11328"
"11329"
"11330"
"11331"
"11332"
"11333"
"11334"
"11335"
"11336"
"11337"
"11338"
"11339"
"11340"
"11341"
"11342"
"11343"
"11344"
"11345"
"11346"
"11347"
"11348"
"11349"
"11350"
"11351"
"11352"
"11353"
"11354"
"11355"
"11356"
"11357"
"11358"
"11359"
"11360"
"11361"
"11362"
"11363"
"11364"
"11365"
"11366"
"11367"
"11368"
"11369"
"11370"
"11371"
"11372"
"11373"
"11374"
"11375"
"11376"
"11377"
"11378"
"11379"
"11380"
"11381"
"11382"
"11383"
"11384"
"11385"
"11386"
"11387"
"11388"
"11389"
"11390"
"11391"
"11392"
"11393"
"11394"
"11395"
"11396"
"11397"
"11398"
"11399"
"11400"
"11401"
"11402"
"11403"
"11404"
"11405"
"11406"
"11407"
"11408"
"11409"
"11410"
"11411"
"11412"
"11413"
"11414"
"11415"
"11416"
"11417"
"11418"
"11419"
"11420"
"11421"
"11422"
"11423"
"11424"
"11425"
"11426"
"11427"
"11428"
"11429"
"11430"
"11431"
"11432"
"11433"
"11434"
"11435"
"11436"
"11437"
"11438"
"11439"
"11440"
"11441"
"11442"
"11443"
"11444"
"11445"
"11446"
"11447"
"11448"
"11449"
"11450"
"11451"
"11452"
"11453"
"11454"
"11455"
"11456"
"11457"
"11458"
"11459"
"11460"
"11461"
"11462"
"11463"
"11464"
"11465"
"11466"
"11467"
"11468"
"11469"
"11470"
"11471"
"11472"
"11473"
"11474"
"11475"
"11476"
"11477"
"11478"
"11479"
"11480"
"11481"
"11482"
"11483"
"11484"
"11485"
"11486"
"11487"
"11488"
"11489"
"11490"
"11491"
"11492"
"11493"
"11494"
"11495"
"11496"
"11497"
"11498"
"11499"
"11500"
"11501"
"11502"
"11503"
"11504"
"11505"
"11506"
"11507"
"11508"
"11509"
"11510"
"11511"
"11512"
"11513"
"11514"
"11515"
"11516"
"11517"
"11518"
"11519"
"11520"
"11521"
"11522"
"11523"
"11524"
"11525"
"11526"
"11527"
"11528"
"11529"
"11530"
"11531"
"11532"
"11533"
"11534"
"11535"
"11536"
"11537"
"11538"
"11539"
"11540"
"11541"
"11542"
"11543"
"11544"
"11545"
"11546"
"11547"
"11548"
"11549"
"11550"
"11551"
"11552"
"11553"
"11554"
"11555"
"11556"
"11557"
"11558"
"11559"
"11560"
"11561"
"11562"
"11563"
"11564"
"11565"
"11566"
"11567"
"11568"
"11569"
"11570"
"11571"
"11572"
"11573"
"11574"
"11575"
"11576"
"11577"
"11578"
"11579"
"11580"
"11581"
"11582"
"11583"
"11584"
"11585"
"11586"
"11587"
"11588"
"11589"
"11590"
"11591"
"11592"
"11593"
"11594"
"11595"
"11596"
"11597"
"11598"
"11599"
"11600"
"11601"
"11602"
"11603"
"11604"
"11605"
"11606"
"11607"
"11608"
"11609"
"11610"
"11611"
"11612"
"11613"
"11614"
"11615"
"11616"
"11617"
"11618"
"11619"
"11620"
"11621"
"11622"
"11623"
"11624"
"11625"
"11626"
"11627"
"11628"
"11629"
"11630"
"11631"
"11632"
"11633"
"11634"
"11635"
"11636"
"11637"
"11638"
"11639"
"11640"
"11641"
"11642"
"11643"
"11644"
"11645"
"11646"
"11647"
"11648"
"11649"
"11650"
"11651"
"11652"
"11653"
"11654"
"11655"
"11656"
"11657"
"11658"
"11659"
"11660"
"11661"
"11662"
"11663"
"11664"
"11665"
"11666"
"11667"
"11668"
"11669"
"11670"
"11671"
"11672"
"11673"
"11674"
"11675"
"11676"
"11677"
"11678"
"11679"
"11680"
"11681"
"11682"
"11683"
"11684"
"11685"
"11686"
"11687"
"11688"
"11689"
"11690"
"11691"
"11692"
"11693"
"11694"
"11695"
"11696"
"11697"
"11698"
"11699"
"11700"
"11701"
"11702"
"11703"
"11704"
"11705"
"11706"
"11707"
"11708"
"11709"
"11710"
"11711"
"11712"
"11713"
"11714"
"11715"
"11716"
"11717"
"11718"
"11719"
"11720"
"11721"
"11722"
"11723"
"11724"
"11725"
"11726"
"11727"
"11728"
"11729"
"11730"
"11731"
"11732"
"11733"
"11734"
"11735"
"11736"
"11737"
"11738"
"11739"
"11740"
"11741"
"11742"
"11743"
"11744"
"11745"
"11746"
"11747"
"11748"
"11749"
"11750"
"11751"
"11752"
"11753"
"11754"
"11755"
"11756"
"11757"
"11758"
"11759"
"11760"
"11761"
"11762"
"11763"
"11764"
"11765"
"11766"
"11767"
"11768"
"11769"
"11770"
"11771"
"11772"
"11773"
"11774"
"11775"
"11776"
"11777"
"11778"
"11779"
"11780"
"11781"
"11782"
"11783"
"11784"
"11785"
"11786"
"11787"
"11788"
"11789"
"11790"
"11791"
"11792"
"11793"
"11794"
"11795"
"11796"
"11797"
"11798"
"11799"
"11800"
"11801"
"11802"
"11803"
"11804"
"11805"
"11806"
"11807"
"11808"
"11809"
"11810"
"11811"
"11812"
"11813"
"11814"
"11815"
"11816"
"11817"
"11818"
"11819"
"11820"
"11821"
"11822"
"11823"
"11824"
"11825"
"11826"
"11827"
"11828"
"11829"
"11830"
"11831"
"11832"
"11833"
"11834"
"11835"
"11836"
"11837"
"11838"
"11839"
"11840"
"11841"
"11842"
"11843"
"11844"
"11845"
"11846"
"11847"
"11848"
"11849"
"11850"
"11851"
"11852"
"11853"
"11854"
"11855"
"11856"
"11857"
"11858"
"11859"
"11860"
"11861"
"11862"
"11863"
"11864"
"11865"
"11866"
"11867"
"11868"
"11869"
"11870"
"11871"
"11872"
"11873"
"11874"
"11875"
"11876"
"11877"
"11878"
"11879"
"11880"
"11881"
"11882"
"11883"
"11884"
"11885"
"11886"
"11887"
"11888"
"11889"
"11890"
"11891"
"11892"
"11893"
"11894"
"11895"
"11896"
"11897"
"11898"
"11899"
"11900"
"11901"
"11902"
"11903"
"11904"
"11905"
"11906"
"11907"
"11908"
"11909"
"11910"
"11911"
"11912"
"11913"
"11914"
"11915"
"11916"
"11917"
"11918"
"11919"
"11920"
"11921"
"11922"
"11923"
"11924"
"11925"
"11926"
"11927"
"11928"
"11929"
"11930"
"11931"
"11932"
"11933"
"11934"
"11935"
"11936"
"11937"
"11938"
"11939"
"11940"
"11941"
"11942"
"11943"
"11944"
"11945"
"11946"
"11947"
"11948"
"11949"
"11950"
"11951"
"11952"
"11953"
"11954"
"11955"
"11956"
"11957"
"11958"
"11959"
"11960"
"11961"
"11962"
"11963"
"11964"
"11965"
"11966"
"11967"
"11968"
"11969"
"11970"
"11971"
"11972"
"11973"
"11974"
"11975"
"11976"
"11977"
"11978"
"11979"
"11980"
"11981"
"11982"
"11983"
"11984"
"11985"
"11986"
"11987"
"11988"
"11989"
"11990"
"11991"
"11992"
"11993"
"11994"
"11995"
"11996"
"11997"
"11998"
"11999"
"12000"
"12001"
"12002"
"12003"
"12004"
"12005"
"12006"
"12007"
"12008"
"12009"
"12010"
"12011"
"12012"
"12013"
"12014"
"12015"
"12016"
"12017"
"12018"
"12019"
"12020"
"12021"
"12022"
"12023"
"12024"
"12025"
"12026"
"12027"
"12028"
"12029"
"12030"
"12031"
"12032"
"12033"
"12034"
"12035"
"12036"
"12037"
"12038"
"12039"
"12040"
"12041"
"12042"
"12043"
"12044"
"12045"
"12046"
"12047"
"12048"
"12049"
"12050"
"12051"
"12052"
"12053"
"12054"
"12055"
"12056"
"12057"
"12058"
"12059"
"12060"
"12061"
"12062"
"12063"
"12064"
"12065"
"12066"
"12067"
"12068"
"12069"
"12070"
"12071"
"12072"
"12073"
"12074"
"12075"
"12076"
"12077"
"12078"
"12079"
"12080"
"12081"
"12082"
"12083"
"12084"
"12085"
"12086"
"12087"
"12088"
"12089"
"12090"
"12091"
"12092"
"12093"
"12094"
"12095"
"12096"
"12097"
"12098"
"12099"
"12100"
"12101"
"12102"
"12103"
"12104"
"12105"
"12106"
"12107"
"12108"
"12109"
"12110"
"12111"
"12112"
"12113"
"12114"
"12115"
"12116"
"12117"
"12118"
"12119"
"12120"
"12121"
"12122"
"12123"
"12124"
"12125"
"12126"
"12127"
"12128"
"12129"
"12130"
"12131"
"12132"
"12133"
"12134"
"12135"
"12136"
"12137"
"12138"
"12139"
"12140"
"12141"
"12142"
"12143"
"12144"
"12145"
"12146"
"12147"
"12148"
"12149"
"12150"
"12151"
"12152"
"12153"
"12154"
"12155"
"12156"
"12157"
"12158"
"12159"
"12160"
"12161"
"12162"
"12163"
"12164"
"12165"
"12166"
"12167"
"12168"
"12169"
"12170"
"12171"
"12172"
"12173"
"12174"
"12175"
"12176"
"12177"
