# Supplementary material for: APP Is a Context-Sensitive Regulator of the Hippocampal Presynaptic Active Zone
Source: PLOS journal article supplement (doi:10.1371/journal.pcbi.1004832), 2016-04-19
Supplement: S6 (10.1371/journal.pcbi.1004832.s006) [file journal.pcbi.1004832.s006.cys › CytoscapeSession-2016_01_22-10_07/tables/8163-Communities/HIDDEN-org.cytoscape.model.CyNode-8163+hidden+node.cytable]

"CyCSV-Version","1"
"SUID"
"java.lang.Long"
""
"8163 hidden node",""
"8173"
"8174"
"8175"
"8176"
"8177"
"8178"
"8179"
"8180"
"8181"
"8182"
"8183"
"8184"
"8185"
"8186"
"8187"
"8188"
"8189"
"8190"
"8191"
"8192"
"8193"
"8194"
"8195"
"8196"
"8197"
"8198"
"8199"
"8200"
"8201"
"8202"
"8203"
"8204"
"8205"
"8206"
"8207"
"8208"
"8209"
"8210"
"8211"
"8212"
"8213"
"8214"
"8215"
"8216"
"8217"
"8218"
"8219"
"8220"
"8221"
"8222"
"8223"
"8224"
"8225"
"8226"
"8227"
"8228"
"8229"
"8230"
"8231"
"8232"
"8233"
"8234"
"8235"
"8236"
"8237"
"8238"
"8239"
"8240"
"8241"
"8242"
"8243"
"8244"
"8245"
"8246"
"8247"
"8248"
"8249"
"8250"
"8251"
"8252"
"8253"
"8254"
"8255"
"8256"
"8257"
"8258"
"8259"
"8260"
"8261"
"8262"
"8263"
"8264"
"8265"
"8266"
"8267"
"8268"
"8269"
"8270"
"8271"
"8272"
"8273"
"8274"
"8275"
"8276"
"8277"
"8278"
"8279"
"8280"
"8281"
"8282"
"8283"
"8284"
"8285"
"8286"
"8287"
"8288"
"8289"
"8290"
"8291"
"8292"
"8293"
"8294"
"8295"
"8296"
"8297"
"8298"
"8299"
"8300"
"8301"
"8302"
"8303"
"8304"
"8305"
"8306"
"8307"
"8308"
"8309"
"8310"
"8311"
"8312"
"8313"
"8314"
"8315"
"8316"
"8317"
"8318"
"8319"
"8320"
"8321"
"8322"
"8323"
"8324"
"8325"
"8326"
"8327"
"8328"
"8329"
"8330"
"8331"
"8332"
"8333"
"8334"
"8335"
"8336"
"8337"
"8338"
"8339"
"8340"
"8341"
"8342"
"8343"
"8344"
"8345"
"8346"
"8347"
"8348"
"8349"
"8350"
"8351"
"8352"
"8353"
"8354"
"8355"
"8356"
"8357"
"8358"
"8359"
"8360"
"8361"
"8362"
"8363"
"8364"
"8365"
"8366"
"8367"
"8368"
"8369"
"8370"
"8371"
"8372"
"8373"
"8374"
"8375"
"8376"
"8377"
"8378"
"8379"
"8380"
"8381"
"8382"
"8383"
"8384"
"8385"
"8386"
"8387"
"8388"
"8389"
"8390"
"8391"
"8392"
"8393"
"8394"
"8395"
"8396"
"8397"
"8398"
"8399"
"8400"
"8401"
"8402"
"8403"
"8404"
"8405"
"8406"
"8407"
"8408"
"8409"
"8410"
"8411"
"8412"
"8413"
"8414"
"8415"
"8416"
"8417"
"8418"
"8419"
"8420"
"8421"
"8422"
"8423"
"8424"
"8425"
"8426"
"8427"
"8428"
"8429"
"8430"
"8431"
"8432"
"8433"
"8434"
"8435"
"8436"
"8437"
"8438"
"8439"
"8440"
"8441"
"8442"
"8443"
"8444"
"8445"
"8446"
"8447"
"8448"
"8449"
"8450"
"8451"
"8452"
"8453"
"8454"
"8455"
"8456"
"8457"
"8458"
"8459"
"8460"
"8461"
"8462"
"8463"
"8464"
"8465"
"8466"
"8467"
"8468"
"8469"
"8470"
"8471"
"8472"
"8473"
"8474"
"8475"
"8476"
"8477"
"8478"
"8479"
"8480"
"8481"
"8482"
"8483"
"8484"
"8485"
"8486"
"8487"
"8488"
"8489"
"8490"
"8491"
"8492"
"8493"
"8494"
"8495"
"8496"
"8497"
"8498"
"8499"
"8500"
"8501"
"8502"
"8503"
"8504"
"8505"
"8506"
"8507"
"8508"
"8509"
"8510"
"8511"
"8512"
"8513"
"8514"
"8515"
"8516"
"8517"
"8518"
"8519"
"8520"
"8521"
"8522"
"8523"
"8524"
"8525"
"8526"
"8527"
"8528"
"8529"
"8530"
"8531"
"8532"
"8533"
"8534"
"8535"
"8536"
"8537"
"8538"
"8539"
"8540"
"8541"
"8542"
"8543"
"8544"
"8545"
"8546"
"8547"
"8548"
"8549"
"8550"
"8551"
"8552"
"8553"
"8554"
"8555"
"8556"
"8557"
"8558"
"8559"
"8560"
"8561"
"8562"
"8563"
"8564"
"8565"
"8566"
"8567"
"8568"
"8569"
"8570"
"8571"
"8572"
"8573"
"8574"
"8575"
"8576"
"8577"
"8578"
"8579"
"8580"
"8581"
"8582"
"8583"
"8584"
"8585"
"8586"
"8587"
"8588"
"8589"
"8590"
"8591"
"8592"
"8593"
"8594"
"8595"
"8596"
"8597"
"8598"
"8599"
"8600"
"8601"
"8602"
"8603"
"8604"
"8605"
"8606"
"8607"
"8608"
"8609"
"8610"
"8611"
"8612"
"8613"
"8614"
"8615"
"8616"
"8617"
"8618"
"8619"
"8620"
"8621"
"8622"
"8623"
"8624"
"8625"
"8626"
"8627"
"8628"
"8629"
"8630"
"8631"
"8632"
"8633"
"8634"
"8635"
"8636"
"8637"
"8638"
"8639"
"8640"
"8641"
"8642"
"8643"
"8644"
"8645"
"8646"
"8647"
"8648"
"8649"
"8650"
"8651"
"8652"
"8653"
"8654"
"8655"
"8656"
"8657"
"8658"
"8659"
"8660"
"8661"
"8662"
"8663"
"8664"
"8665"
"8666"
"8667"
"8668"
"8669"
"8670"
"8671"
"8672"
"8673"
"8674"
"8675"
"8676"
"8677"
"8678"
"8679"
"8680"
"8681"
"8682"
"8683"
"8684"
"8685"
"8686"
"8687"
"8688"
"8689"
"8690"
"8691"
"8692"
"8693"
"8694"
"8695"
"8696"
"8697"
"8698"
"8699"
"8700"
"8701"
"8702"
"8703"
"8704"
"8705"
"8706"
"8707"
"8708"
"8709"
"8710"
"8711"
"8712"
"8713"
"8714"
"8715"
"8716"
"8717"
"8718"
"8719"
"8720"
"8721"
"8722"
"8723"
"8724"
"8725"
"8726"
"8727"
"8728"
"8729"
"8730"
"8731"
"8732"
"8733"
"8734"
"8735"
"8736"
"8737"
"8738"
"8739"
"8740"
"8741"
"8742"
"8743"
"8744"
"8745"
"8746"
"8747"
"8748"
"8749"
"8750"
"8751"
"8752"
"8753"
"8754"
"8755"
"8756"
"8757"
"8758"
"8759"
"8760"
"8761"
"8762"
"8763"
"8764"
"8765"
"8766"
"8767"
"8768"
"8769"
"8770"
"8771"
"8772"
"8773"
"8774"
"8775"
"8776"
"8777"
"8778"
"8779"
"8780"
"8781"
"8782"
"8783"
"8784"
"8785"
"8786"
"8787"
