# Supplementary material for: APP Is a Context-Sensitive Regulator of the Hippocampal Presynaptic Active Zone
Source: PLOS journal article supplement (doi:10.1371/journal.pcbi.1004832), 2016-04-19
Supplement: S6 (10.1371/journal.pcbi.1004832.s006) [file journal.pcbi.1004832.s006.cys › CytoscapeSession-2016_01_22-10_07/tables/8163-Communities/LOCAL_ATTRS-org.cytoscape.model.CyEdge-Communities+default+edge.cytable]

CyCSV-Version	1
SUID	interaction	name	selected
java.lang.Long	java.lang.String	java.lang.String	java.lang.Boolean
Communities default edge
8788	pp	Q01097 (pp) Q80Z38	false
8789	pp	Q01097 (pp) P05132	false
8790	pp	Q01097 (pp) P15105	false
8791	pp	Q01097 (pp) O35526	false
8792	pp	Q01097 (pp) P51881	false
8793	pp	Q01097 (pp) P68510	false
8794	pp	Q01097 (pp) Q60676	false
8795	pp	Q01097 (pp) P12367	false
8796	pp	Q01097 (pp) P63085	false
8797	pp	Q01097 (pp) P47754	false
8798	pp	Q01097 (pp) Q03265	false
8799	pp	Q01097 (pp) P62835	false
8800	pp	Q01097 (pp) Q6PHZ2	false
8801	pp	Q01097 (pp) Q9D6M3	false
8802	pp	Q01097 (pp) P63101	false
8803	pp	Q01097 (pp) P17426	false
8804	pp	Q01097 (pp) P68033	false
8805	pp	Q01097 (pp) P68369	false
8806	pp	Q01097 (pp) P47757	false
8807	pp	Q01097 (pp) P05063	false
8808	pp	Q01097 (pp) P20357	false
8809	pp	Q01097 (pp) P31938	false
8810	pp	Q01097 (pp) P16054	false
8811	pp	Q01097 (pp) P51863	false
8812	pp	Q01097 (pp) P16858	false
8813	pp	Q01097 (pp) P06151	false
8814	pp	Q01097 (pp) P60879	false
8815	pp	Q01097 (pp) O88952	false
8816	pp	Q01097 (pp) P05480	false
8817	pp	Q01097 (pp) P50516	false
8818	pp	Q01097 (pp) P63318	false
8819	pp	Q01097 (pp) P97772	false
8820	pp	Q01097 (pp) P68404	false
8821	pp	Q01097 (pp) O55100	false
8822	pp	Q01097 (pp) Q91VR2	false
8823	pp	Q01097 (pp) P35279	false
8824	pp	Q01097 (pp) P63321	false
8825	pp	Q01097 (pp) P61982	false
8826	pp	Q01097 (pp) P60710	false
8827	pp	Q01097 (pp) P08553	false
8828	pp	Q01097 (pp) P62204	false
8829	pp	Q01097 (pp) Q61411	false
8830	pp	Q01097 (pp) P62259	false
8831	pp	Q01097 (pp) P48962	false
8832	pp	Q01097 (pp) O08599	false
8833	pp	Q01097 (pp) Q923T9	false
8834	pp	Q01097 (pp) Q9JM76	false
8835	pp	Q01097 (pp) P46096	false
8836	pp	Q01097 (pp) P63328	false
8837	pp	Q01097 (pp) P63001	false
8838	pp	Q01097 (pp) P59999	false
8839	pp	Q01097 (pp) F6SEU4	false
8840	pp	Q01097 (pp) P63011	false
8841	pp	Q01097 (pp) Q8BH59	false
8842	pp	Q01097 (pp) P17751	false
8843	pp	Q01097 (pp) O88737	false
8844	pp	Q01097 (pp) P06837	false
8845	pp	Q01097 (pp) P43006	false
8846	pp	Q01097 (pp) Q9CVB6	false
8847	pp	Q01097 (pp) P08551	false
8848	pp	Q01097 (pp) P11627	false
8849	pp	Q01097 (pp) P13020	false
8850	pp	Q01097 (pp) P05202	false
8851	pp	Q01097 (pp) P62874	false
8852	pp	Q01097 (pp) P35438	false
8853	pp	Q01097 (pp) P30999	false
8854	pp	Q01097 (pp) D3YVF0	false
8855	pp	Q01097 (pp) Q9QXS6	false
8856	pp	Q01097 (pp) P39053	false
8857	pp	Q01097 (pp) P63330	false
8858	pp	Q01097 (pp) P46660	false
8859	pp	Q01097 (pp) P53994	false
8860	pp	Q01097 (pp) P35436	false
8861	pp	Q01097 (pp) O35129	false
8862	pp	Q01097 (pp) P68181	false
8863	pp	Q01097 (pp) Q61879	false
8864	pp	Q01097 (pp) P31324	false
8865	pp	Q01097 (pp) P57780	false
8866	pp	Q01097 (pp) P15116	false
8867	pp	Q01097 (pp) A2CG49	false
8868	pp	Q01097 (pp) P12382	false
8869	pp	Q80Z38 (pp) Q8BYM5	false
8870	pp	Q80Z38 (pp) P35438	false
8871	pp	Q9CQZ5 (pp) Q9D6J6	false
8872	pp	Q9CQZ5 (pp) P48771	false
8873	pp	Q9CQZ5 (pp) Q91VR2	false
8874	pp	Q9CQZ5 (pp) Q91VD9	false
8875	pp	Q9CQZ5 (pp) Q9CPP6	false
8876	pp	Q9CQZ5 (pp) Q9CQZ6	false
8877	pp	Q9CQZ5 (pp) P19536	false
8878	pp	Q9CQZ5 (pp) O09111	false
8879	pp	Q9CQZ5 (pp) P97450	false
8880	pp	Q9CQZ5 (pp) Q91YT0	false
8881	pp	Q9CQZ5 (pp) Q9CQ69	false
8882	pp	Q9CQZ5 (pp) Q99LC5	false
8883	pp	Q9CQZ5 (pp) P99029	false
8884	pp	Q9CQZ5 (pp) Q9CPQ8	false
8885	pp	Q9CQZ5 (pp) Q9CQC7	false
8886	pp	Q9CQZ5 (pp) Q3UIU2	false
8887	pp	Q9CQZ5 (pp) Q9CQQ7	false
8888	pp	Q9CQZ5 (pp) Q62425	false
8889	pp	Q9CQZ5 (pp) Q9CR68	false
8890	pp	Q9CQZ5 (pp) Q9CZ13	false
8891	pp	Q9CQZ5 (pp) Q9DC69	false
8892	pp	Q9CQZ5 (pp) Q9D0S9	false
8893	pp	Q9CQZ5 (pp) Q99LC3	false
8894	pp	Q9CQZ5 (pp) Q9D6J5	false
8895	pp	Q9CQZ5 (pp) Q9DCS9	false
8896	pp	Q9CQZ5 (pp) Q06185	false
8897	pp	Q9CQZ5 (pp) Q9DCX2	false
8898	pp	Q9CQZ5 (pp) Q9DB20	false
8899	pp	Q9CQZ5 (pp) Q9CQ54	false
8900	pp	Q9CQZ5 (pp) Q9D3D9	false
8901	pp	Q9CQZ5 (pp) Q9ERS2	false
8902	pp	Q9CQZ5 (pp) Q9WUM5	false
8903	pp	Q9CQZ5 (pp) Q9DCJ5	false
8904	pp	Q9CQZ5 (pp) Q8K3J1	false
8905	pp	Q9CQZ5 (pp) Q9D0M3	false
8906	pp	Q9CQZ5 (pp) Q99LX0	false
8907	pp	Q9CQZ5 (pp) Q9CQH3	false
8908	pp	Q9CQZ5 (pp) Q9DB77	false
8909	pp	Q9CQZ5 (pp) Q9Z1P6	false
8910	pp	Q9D6J6 (pp) Q01097	false
8911	pp	O08749 (pp) Q9D051	false
8912	pp	O08749 (pp) P97807	false
8913	pp	O08749 (pp) Q91YT0	false
8914	pp	O08749 (pp) Q03265	false
8915	pp	O08749 (pp) Q99LC5	false
8916	pp	O08749 (pp) Q6PB66	false
8917	pp	O08749 (pp) Q60931	false
8918	pp	O08749 (pp) Q99KI0	false
8919	pp	O08749 (pp) Q9Z2I9	false
8920	pp	O08749 (pp) Q9WUM5	false
8921	pp	O08749 (pp) Q60597	false
8922	pp	O08749 (pp) Q9D6J6	false
8923	pp	O08749 (pp) Q8BKZ9	false
8924	pp	O08749 (pp) Q8BMF4	false
8925	pp	O08749 (pp) P63038	false
8926	pp	O08749 (pp) P99029	false
8927	pp	O08749 (pp) O88441	false
8928	pp	O08749 (pp) Q91VD9	false
8929	pp	O08749 (pp) Q9CQH3	false
8930	pp	O08749 (pp) P09671	false
8931	pp	O08749 (pp) Q91VR2	false
8932	pp	O08749 (pp) Q8K2B3	false
8933	pp	O08749 (pp) Q9CZU6	false
8934	pp	O08749 (pp) Q9CQA3	false
8935	pp	O08749 (pp) P52480	false
8936	pp	O08749 (pp) Q9DB77	false
8937	pp	O08749 (pp) P08249	false
8938	pp	O08749 (pp) Q9D2G2	false
8939	pp	O08749 (pp) Q9D6R2	false
8940	pp	O08749 (pp) P35486	false
8941	pp	O08749 (pp) Q91ZJ5	false
8942	pp	O08749 (pp) Q9DC69	false
8943	pp	O08749 (pp) P56480	false
8944	pp	Q9D051 (pp) Q03265	false
8945	pp	Q9D051 (pp) Q91VD9	false
8946	pp	Q9D051 (pp) Q8BMF4	false
8947	pp	Q9D051 (pp) Q9DB77	false
8948	pp	Q9D051 (pp) P63101	false
8949	pp	Q9D051 (pp) Q9CQQ7	false
8950	pp	Q9D051 (pp) P52480	false
8951	pp	Q9D051 (pp) Q9D6R2	false
8952	pp	Q9D051 (pp) P40142	false
8953	pp	Q9D051 (pp) P16054	false
8954	pp	Q9D051 (pp) P06151	false
8955	pp	Q9D051 (pp) P97450	false
8956	pp	Q9D051 (pp) Q8BMF3	false
8957	pp	Q9D051 (pp) P97807	false
8958	pp	Q9D051 (pp) Q9CQH3	false
8959	pp	Q9D051 (pp) Q9D0M3	false
8960	pp	Q9D051 (pp) Q9D2G2	false
8961	pp	Q9D051 (pp) Q9CR68	false
8962	pp	Q9D051 (pp) Q05920	false
8963	pp	Q9D051 (pp) Q9DCJ5	false
8964	pp	Q9D051 (pp) Q99LC5	false
8965	pp	Q9D051 (pp) P35486	false
8966	pp	Q9D051 (pp) Q93092	false
8967	pp	Q9D051 (pp) P06745	false
8968	pp	Q9D3D9 (pp) O09111	false
8969	pp	Q9D3D9 (pp) Q9ERS2	false
8970	pp	Q9D3D9 (pp) Q9CQH3	false
8971	pp	Q9D3D9 (pp) Q91VR2	false
8972	pp	Q9D3D9 (pp) Q99LY9	false
8973	pp	Q9D3D9 (pp) Q9D6J6	false
8974	pp	O09111 (pp) Q9CQH3	false
8975	pp	O09111 (pp) Q9D6J6	false
8976	pp	Q03265 (pp) P68510	false
8977	pp	Q03265 (pp) Q91VM9	false
8978	pp	Q03265 (pp) Q9DC69	false
8979	pp	Q03265 (pp) Q9CR68	false
8980	pp	Q03265 (pp) Q9DCX2	false
8981	pp	Q03265 (pp) Q91VD9	false
8982	pp	Q03265 (pp) Q9CZ13	false
8983	pp	Q03265 (pp) P97807	false
8984	pp	Q03265 (pp) P16054	false
8985	pp	Q03265 (pp) P09411	false
8986	pp	Q03265 (pp) Q8K3J1	false
8987	pp	Q03265 (pp) Q99LC5	false
8988	pp	Q03265 (pp) Q9R0Y5	false
8989	pp	Q03265 (pp) Q91VR2	false
8990	pp	Q03265 (pp) Q91YT0	false
8991	pp	Q03265 (pp) Q9WUM5	false
8992	pp	Q03265 (pp) Q06185	false
8993	pp	Q03265 (pp) Q9DB77	false
8994	pp	Q03265 (pp) P63038	false
8995	pp	Q03265 (pp) Q60931	false
8996	pp	Q03265 (pp) Q8VEM8	false
8997	pp	Q03265 (pp) Q9D2G2	false
8998	pp	Q03265 (pp) Q9D3D9	false
8999	pp	Q03265 (pp) P48962	false
9000	pp	Q03265 (pp) P19536	false
9001	pp	Q03265 (pp) P03930	false
9002	pp	Q03265 (pp) Q9CQQ7	false
9003	pp	Q03265 (pp) O35143	false
9004	pp	Q03265 (pp) Q9D6J6	false
9005	pp	Q03265 (pp) Q9CQH3	false
9006	pp	Q03265 (pp) P43024	false
9007	pp	P68510 (pp) P05202	false
9008	pp	P68510 (pp) P17751	false
9009	pp	P68510 (pp) Q99PT1	false
9010	pp	P68510 (pp) P68368	false
9011	pp	P68510 (pp) Q9D8B3	false
9012	pp	P68510 (pp) Q9CQ92	false
9013	pp	P68510 (pp) Q91VZ6	false
9014	pp	P68510 (pp) Q8VBV7	false
9015	pp	P68510 (pp) P08249	false
9016	pp	P68510 (pp) Q61553	false
9017	pp	P68510 (pp) P67871	false
9018	pp	P68510 (pp) O55042	false
9019	pp	P68510 (pp) P10637	false
9020	pp	P68510 (pp) P61164	false
9021	pp	P68510 (pp) Q9R0Q6	false
9022	pp	P68510 (pp) P63101	false
9023	pp	P68510 (pp) P48036	false
9024	pp	P68510 (pp) P50518	false
9025	pp	P68510 (pp) P12787	false
9026	pp	P68510 (pp) Q9CWS0	false
9027	pp	P68510 (pp) Q68FD5	false
9028	pp	P68510 (pp) P54071	false
9029	pp	P68510 (pp) Q9ERS2	false
9030	pp	P68510 (pp) P42208	false
9031	pp	P68510 (pp) P46460	false
9032	pp	P68510 (pp) Q60930	false
9033	pp	P68510 (pp) Q9DCW4	false
9034	pp	P68510 (pp) Q9WV55	false
9035	pp	P68510 (pp) P11499	false
9036	pp	P68510 (pp) Q9D051	false
9037	pp	P68510 (pp) P56480	false
9038	pp	P68510 (pp) Q9CQW1	false
9039	pp	P68510 (pp) Q9DCJ5	false
9040	pp	P68510 (pp) P62259	false
9041	pp	P12382 (pp) P35438	false
9042	pp	P12382 (pp) P17710	false
9043	pp	P12382 (pp) P05063	false
9044	pp	P12382 (pp) P05064	false
9045	pp	P12382 (pp) Q93092	false
9046	pp	P12382 (pp) P63101	false
9047	pp	P12382 (pp) P06745	false
9048	pp	P12382 (pp) P52480	false
9049	pp	P12382 (pp) P47857	false
9050	pp	P12382 (pp) P17751	false
9051	pp	P35438 (pp) P28652	false
9052	pp	P35438 (pp) Q6PIC6	false
9053	pp	P35438 (pp) Q60631	false
9054	pp	P35438 (pp) P68033	false
9055	pp	P35438 (pp) P06837	false
9056	pp	P35438 (pp) P68368	false
9057	pp	P35438 (pp) P62259	false
9058	pp	P35438 (pp) O55100	false
9059	pp	P35438 (pp) P57780	false
9060	pp	P35438 (pp) Q8BMF4	false
9061	pp	P35438 (pp) Q6URW6	false
9062	pp	P35438 (pp) O88737	false
9063	pp	P35438 (pp) A2CG49	false
9064	pp	P35438 (pp) P63017	false
9065	pp	P35438 (pp) P12367	false
9066	pp	P35438 (pp) O35526	false
9067	pp	P35438 (pp) F6SEU4	false
9068	pp	P35438 (pp) P11627	false
9069	pp	P05202 (pp) P54071	false
9070	pp	P05202 (pp) Q9D6R2	false
9071	pp	P05202 (pp) Q60597	false
9072	pp	P05202 (pp) Q05920	false
9073	pp	P05202 (pp) Q8BH04	false
9074	pp	P05202 (pp) P06151	false
9075	pp	P05202 (pp) P70404	false
9076	pp	Q9QUI0 (pp) Q06335	false
9077	pp	Q9QUI0 (pp) Q99PT1	false
9078	pp	Q9QUI0 (pp) P30999	false
9079	pp	Q9QUI0 (pp) P63001	false
9080	pp	Q9QUI0 (pp) O88643	false
9081	pp	Q06335 (pp) Q9QXJ1	false
9082	pp	Q06335 (pp) P63330	false
9083	pp	Q06335 (pp) P04925	false
9084	pp	Q06335 (pp) P12023	false
9085	pp	Q06335 (pp) P63001	false
9086	pp	Q06335 (pp) Q03157	false
9087	pp	P23819 (pp) P35436	false
9088	pp	P23819 (pp) P68369	false
9089	pp	P23819 (pp) P99024	false
9090	pp	P23819 (pp) O08599	false
9091	pp	P23819 (pp) P38647	false
9092	pp	P23819 (pp) P16330	false
9093	pp	P35436 (pp) P35438	false
9094	pp	Q9CZU6 (pp) Q9DCD0	false
9095	pp	Q9CZU6 (pp) Q91VD9	false
9096	pp	Q9CZU6 (pp) P05202	false
9097	pp	Q9CZU6 (pp) Q8BKZ9	false
9098	pp	Q9CZU6 (pp) Q8BMF3	false
9099	pp	Q9CZU6 (pp) P26443	false
9100	pp	Q9CZU6 (pp) P08249	false
9101	pp	Q9CZU6 (pp) Q91VR2	false
9102	pp	Q9CZU6 (pp) P97807	false
9103	pp	Q9CZU6 (pp) P06151	false
9104	pp	Q9CZU6 (pp) Q8K2B3	false
9105	pp	Q9CZU6 (pp) Q99KI0	false
9106	pp	Q9CZU6 (pp) Q8BWT1	false
9107	pp	Q9CZU6 (pp) Q91WD5	false
9108	pp	Q9CZU6 (pp) Q91YT0	false
9109	pp	Q9CZU6 (pp) Q03265	false
9110	pp	Q9CZU6 (pp) P52480	false
9111	pp	Q9CZU6 (pp) P09671	false
9112	pp	Q9CZU6 (pp) Q9D0M3	false
9113	pp	Q9CZU6 (pp) Q9CQA3	false
9114	pp	Q9CZU6 (pp) Q99JY0	false
9115	pp	Q9CZU6 (pp) Q8BMF4	false
9116	pp	Q9CZU6 (pp) Q8BH04	false
9117	pp	Q9CZU6 (pp) P35486	false
9118	pp	Q9CZU6 (pp) Q8BGH2	false
9119	pp	Q9CZU6 (pp) Q60597	false
9120	pp	Q9CZU6 (pp) Q9DB20	false
9121	pp	Q9CZU6 (pp) Q9D6R2	false
9122	pp	Q9CZU6 (pp) P70404	false
9123	pp	Q9CZU6 (pp) Q9WUM5	false
9124	pp	Q9CZU6 (pp) Q8QZT1	false
9125	pp	Q9CZU6 (pp) P56480	false
9126	pp	Q9CZU6 (pp) Q9D2G2	false
9127	pp	Q9CZU6 (pp) Q05920	false
9128	pp	Q9CZU6 (pp) Q9D6J6	false
9129	pp	Q9CZU6 (pp) Q9CZ13	false
9130	pp	Q9CZU6 (pp) Q9CR68	false
9131	pp	Q9CZU6 (pp) P19096	false
9132	pp	Q9DCD0 (pp) Q9D0F9	false
9133	pp	Q9DCD0 (pp) Q8BMS1	false
9134	pp	Q9DCD0 (pp) Q91ZJ5	false
9135	pp	Q9DCD0 (pp) P06151	false
9136	pp	Q9DCD0 (pp) Q8CAQ8	false
9137	pp	P51863 (pp) Q9Z1G3	false
9138	pp	P51863 (pp) P63082	false
9139	pp	P51863 (pp) Q8BVE3	false
9140	pp	P51863 (pp) P50516	false
9141	pp	P51863 (pp) P57746	false
9142	pp	P51863 (pp) Q9Z1G4	false
9143	pp	P51863 (pp) Q9EPJ9	false
9144	pp	P51863 (pp) P50518	false
9145	pp	P51863 (pp) Q9WTT4	false
9146	pp	Q9Z1G3 (pp) P62331	false
9147	pp	Q9Z1G3 (pp) Q9WTT4	false
9148	pp	Q9Z1G3 (pp) Q9Z1G4	false
9149	pp	Q9Z1G3 (pp) P50516	false
9150	pp	Q9Z1G3 (pp) Q91VM9	false
9151	pp	Q9Z1G3 (pp) Q8BVE3	false
9152	pp	Q9Z1G3 (pp) P63082	false
9153	pp	Q9Z1G3 (pp) P23506	false
9154	pp	P62259 (pp) P47757	false
9155	pp	P62259 (pp) P46660	false
9156	pp	P62259 (pp) Q9JLM8	false
9157	pp	P62259 (pp) O88935	false
9158	pp	P62259 (pp) P10637	false
9159	pp	P62259 (pp) P63101	false
9160	pp	P62259 (pp) Q9QWI6	false
9161	pp	P62259 (pp) P16858	false
9162	pp	P62259 (pp) Q9DC28	false
9163	pp	P62259 (pp) Q03265	false
9164	pp	P62259 (pp) P30999	false
9165	pp	P62259 (pp) Q61316	false
9166	pp	P62259 (pp) Q68FF6	false
9167	pp	P62259 (pp) Q3UTJ2	false
9168	pp	P62259 (pp) Q812A2	false
9169	pp	P47757 (pp) O89053	false
9170	pp	Q8C8R3 (pp) P16546	false
9171	pp	Q8C8R3 (pp) P11627	false
9172	pp	P16546 (pp) Q9CQV8	false
9173	pp	P16546 (pp) O08788	false
9174	pp	P63330 (pp) Q76MZ3	false
9175	pp	P63330 (pp) Q60996	false
9176	pp	P63330 (pp) Q61151	false
9177	pp	P63330 (pp) P35438	false
9178	pp	P63330 (pp) Q6P1F6	false
9179	pp	Q76MZ3 (pp) Q6P1F6	false
9180	pp	Q76MZ3 (pp) O08788	false
9181	pp	Q76MZ3 (pp) P63101	false
9182	pp	Q76MZ3 (pp) P35438	false
9183	pp	Q76MZ3 (pp) Q99KJ8	false
9184	pp	Q76MZ3 (pp) Q60996	false
9185	pp	Q76MZ3 (pp) P50396	false
9186	pp	Q76MZ3 (pp) P62259	false
9187	pp	Q76MZ3 (pp) P61982	false
9188	pp	Q76MZ3 (pp) P18052	false
9189	pp	Q76MZ3 (pp) Q61151	false
9190	pp	Q76MZ3 (pp) Q9DC28	false
9191	pp	Q9CQZ6 (pp) Q9CQ54	false
9192	pp	Q9CQZ6 (pp) Q99LC3	false
9193	pp	Q9CQZ6 (pp) Q3UIU2	false
9194	pp	Q9CQZ6 (pp) Q9CQH3	false
9195	pp	Q9CQZ6 (pp) Q9CR68	false
9196	pp	Q9CQZ6 (pp) Q9DCS9	false
9197	pp	Q9CQZ6 (pp) Q06185	false
9198	pp	Q9CQZ6 (pp) Q9D6J6	false
9199	pp	Q9CQZ6 (pp) Q9WUM5	false
9200	pp	Q9CQZ6 (pp) Q62425	false
9201	pp	Q9CQZ6 (pp) Q9ERS2	false
9202	pp	Q9CQZ6 (pp) Q8K3J1	false
9203	pp	Q9CQZ6 (pp) Q91YT0	false
9204	pp	Q9CQZ6 (pp) Q91VR2	false
9205	pp	Q9CQZ6 (pp) Q99LY9	false
9206	pp	Q9CQZ6 (pp) Q9DCX2	false
9207	pp	Q9CQZ6 (pp) Q9DB77	false
9208	pp	Q9CQZ6 (pp) P56391	false
9209	pp	Q9CQZ6 (pp) Q9DC69	false
9210	pp	Q9CQZ6 (pp) Q9Z1P6	false
9211	pp	Q9CQZ6 (pp) Q9CPQ8	false
9212	pp	Q9CQZ6 (pp) Q99LC5	false
9213	pp	Q9CQZ6 (pp) Q9DCJ5	false
9214	pp	Q9CQZ6 (pp) P48771	false
9215	pp	Q9CQZ6 (pp) Q9CQQ7	false
9216	pp	Q9CQZ6 (pp) Q99LX0	false
9217	pp	Q9CQZ6 (pp) Q9CQ69	false
9218	pp	Q9CQ54 (pp) Q91YT0	false
9219	pp	Q9CQ54 (pp) O09111	false
9220	pp	Q9CQ54 (pp) Q9DC69	false
9221	pp	Q9CQ54 (pp) Q9CQQ7	false
9222	pp	Q9CQ54 (pp) Q9DCJ5	false
9223	pp	Q9CQ54 (pp) Q06185	false
9224	pp	Q9CQ54 (pp) Q8K3J1	false
9225	pp	Q9CQ54 (pp) Q9CQ69	false
9226	pp	Q9CQ54 (pp) Q9D6J6	false
9227	pp	Q9CQ54 (pp) Q9DCS9	false
9228	pp	Q9CQ54 (pp) Q99LY9	false
9229	pp	Q9CQ54 (pp) Q9CQH3	false
9230	pp	Q9CQ54 (pp) Q9Z1P6	false
9231	pp	Q9CQ54 (pp) Q3UIU2	false
9232	pp	Q9DCT2 (pp) Q9CQ69	false
9233	pp	Q9DCT2 (pp) P19783	false
9234	pp	Q9DCT2 (pp) Q99LC3	false
9235	pp	Q9DCT2 (pp) O70325	false
9236	pp	Q9DCT2 (pp) Q9CQA3	false
9237	pp	Q9DCT2 (pp) Q8K1Z0	false
9238	pp	Q9DCT2 (pp) P19536	false
9239	pp	Q9DCT2 (pp) Q9DC70	false
9240	pp	Q9DCT2 (pp) Q3UIU2	false
9241	pp	Q9DCT2 (pp) Q9DB77	false
9242	pp	Q9DCT2 (pp) Q9CQQ7	false
9243	pp	Q9DCT2 (pp) Q9D6J6	false
9244	pp	Q9DCT2 (pp) Q9DCS9	false
9245	pp	Q9DCT2 (pp) Q9D3D9	false
9246	pp	Q9DCT2 (pp) P48771	false
9247	pp	Q9DCT2 (pp) P17751	false
9248	pp	Q9DCT2 (pp) Q8K3J1	false
9249	pp	Q9DCT2 (pp) Q91WD5	false
9250	pp	Q9DCT2 (pp) Q9D6J5	false
9251	pp	Q9DCT2 (pp) P56391	false
9252	pp	Q9DCT2 (pp) Q9ERS2	false
9253	pp	Q9DCT2 (pp) Q03265	false
9254	pp	Q9DCT2 (pp) Q8BGH2	false
9255	pp	Q9DCT2 (pp) Q9CQC7	false
9256	pp	Q9DCT2 (pp) Q9WUM5	false
9257	pp	Q9DCT2 (pp) Q9CQJ8	false
9258	pp	Q9DCT2 (pp) Q9CXZ1	false
9259	pp	Q9DCT2 (pp) Q99LC5	false
9260	pp	Q9DCT2 (pp) Q99LY9	false
9261	pp	Q9DCT2 (pp) Q7TMF3	false
9262	pp	Q9DCT2 (pp) Q9CR68	false
9263	pp	Q9DCT2 (pp) P42125	false
9264	pp	Q9DCT2 (pp) Q9CQZ6	false
9265	pp	Q9DCT2 (pp) P99029	false
9266	pp	Q9DCT2 (pp) Q9D051	false
9267	pp	Q9DCT2 (pp) Q9DC69	false
9268	pp	Q9DCT2 (pp) Q9D855	false
9269	pp	Q9DCT2 (pp) Q9DCX2	false
9270	pp	Q9DCT2 (pp) Q9CQR4	false
9271	pp	Q9DCT2 (pp) Q9DCJ5	false
9272	pp	Q9DCT2 (pp) P09671	false
9273	pp	Q9DCT2 (pp) P56480	false
9274	pp	Q9DCT2 (pp) Q8K2B3	false
9275	pp	Q9DCT2 (pp) Q9CQ75	false
9276	pp	Q9DCT2 (pp) P52503	false
9277	pp	Q9DCT2 (pp) Q91VD9	false
9278	pp	Q9DCT2 (pp) Q8BH95	false
9279	pp	Q9DCT2 (pp) Q91YT0	false
9280	pp	Q9DCT2 (pp) P56379	false
9281	pp	Q9DCT2 (pp) Q9CZ13	false
9282	pp	Q9DCT2 (pp) Q9DB20	false
9283	pp	Q9DCT2 (pp) Q8VEM8	false
9284	pp	Q9DCT2 (pp) Q9CPP6	false
9285	pp	Q9DCT2 (pp) Q9CQ54	false
9286	pp	Q9DCT2 (pp) Q9D0M3	false
9287	pp	Q9DCT2 (pp) Q99KI0	false
9288	pp	Q9DCT2 (pp) Q91VR2	false
9289	pp	Q9DCT2 (pp) O88441	false
9290	pp	Q9DCT2 (pp) Q9CQH3	false
9291	pp	Q9DCT2 (pp) Q62425	false
9292	pp	Q9DCT2 (pp) O09111	false
9293	pp	Q9DCT2 (pp) P68510	false
9294	pp	Q9DCT2 (pp) P62073	false
9295	pp	Q9DCT2 (pp) P08249	false
9296	pp	Q9DCT2 (pp) Q9CPQ1	false
9297	pp	Q9DCT2 (pp) Q9D0S9	false
9298	pp	Q9DCT2 (pp) P50516	false
9299	pp	Q9DCT2 (pp) P97807	false
9300	pp	Q9DCT2 (pp) Q9Z1P6	false
9301	pp	Q9DCT2 (pp) Q9CR62	false
9302	pp	Q9DCT2 (pp) Q9CZU6	false
9303	pp	Q9DCT2 (pp) Q80Y14	false
9304	pp	Q9DCT2 (pp) Q9CQZ5	false
9305	pp	Q9DCT2 (pp) P70404	false
9306	pp	Q9DCT2 (pp) Q06185	false
9307	pp	Q9DCT2 (pp) Q99LX0	false
9308	pp	Q9DCT2 (pp) P97450	false
9309	pp	Q9CQ69 (pp) P56391	false
9310	pp	Q9CQ69 (pp) Q8K3J1	false
9311	pp	Q9CQ69 (pp) Q99LY9	false
9312	pp	Q9CQ69 (pp) Q9D6J6	false
9313	pp	Q9CQ69 (pp) Q9DCJ5	false
9314	pp	Q9CQ69 (pp) Q9CQH3	false
9315	pp	Q9CQ69 (pp) Q9DC69	false
9316	pp	Q9CQ69 (pp) Q9ERS2	false
9317	pp	Q9CQ69 (pp) Q9D3D9	false
9318	pp	Q9CQ69 (pp) P00405	false
9319	pp	Q9CQ69 (pp) Q91VR2	false
9320	pp	Q9CQ69 (pp) Q3UIU2	false
9321	pp	Q9CQ69 (pp) P17665	false
9322	pp	Q9CQ69 (pp) O09111	false
9323	pp	Q9CQ69 (pp) Q9CQQ7	false
9324	pp	Q9CQ69 (pp) Q99LX0	false
9325	pp	P08249 (pp) Q9D6R2	false
9326	pp	P08249 (pp) Q06185	false
9327	pp	P08249 (pp) Q91VR2	false
9328	pp	P08249 (pp) P70404	false
9329	pp	P08249 (pp) O35658	false
9330	pp	P08249 (pp) P17751	false
9331	pp	P08249 (pp) Q9DCD0	false
9332	pp	P08249 (pp) P56480	false
9333	pp	P08249 (pp) Q9D3D9	false
9334	pp	P08249 (pp) P97807	false
9335	pp	P08249 (pp) Q64521	false
9336	pp	P08249 (pp) Q60931	false
9337	pp	P08249 (pp) Q8BGH2	false
9338	pp	P08249 (pp) Q9D051	false
9339	pp	P08249 (pp) Q9D855	false
9340	pp	P08249 (pp) Q8K2B3	false
9341	pp	P08249 (pp) P05202	false
9342	pp	P08249 (pp) Q9DC70	false
9343	pp	P08249 (pp) Q8BH04	false
9344	pp	P08249 (pp) P63038	false
9345	pp	P08249 (pp) Q9D6J6	false
9346	pp	P08249 (pp) Q9CQC7	false
9347	pp	P08249 (pp) Q9CR68	false
9348	pp	P08249 (pp) Q9DB77	false
9349	pp	P08249 (pp) P09411	false
9350	pp	P08249 (pp) Q9DC69	false
9351	pp	P08249 (pp) Q8K3J1	false
9352	pp	P08249 (pp) Q8BMF3	false
9353	pp	P08249 (pp) Q8BMF4	false
9354	pp	P08249 (pp) Q9CQJ8	false
9355	pp	P08249 (pp) Q8VEM8	false
9356	pp	P08249 (pp) Q99KI0	false
9357	pp	P08249 (pp) O09111	false
9358	pp	P08249 (pp) Q99LX0	false
9359	pp	P08249 (pp) Q9DCX2	false
9360	pp	P08249 (pp) Q05920	false
9361	pp	P08249 (pp) Q91YT0	false
9362	pp	P08249 (pp) Q9Z2I9	false
9363	pp	P08249 (pp) P19783	false
9364	pp	P08249 (pp) Q91VD9	false
9365	pp	P08249 (pp) Q9DB20	false
9366	pp	P08249 (pp) P54071	false
9367	pp	P08249 (pp) P52480	false
9368	pp	P08249 (pp) Q9D2G2	false
9369	pp	P08249 (pp) Q9DCJ5	false
9370	pp	P08249 (pp) P97450	false
9371	pp	P08249 (pp) Q9WUM5	false
9372	pp	P08249 (pp) P26443	false
9373	pp	P08249 (pp) Q9CQZ5	false
9374	pp	P08249 (pp) Q9CZ13	false
9375	pp	P08249 (pp) Q9D0M3	false
9376	pp	P08249 (pp) P06745	false
9377	pp	P08249 (pp) P48962	false
9378	pp	P08249 (pp) Q03265	false
9379	pp	P08249 (pp) Q9CQH3	false
9380	pp	P08249 (pp) Q9CQQ7	false
9381	pp	P08249 (pp) Q9DCS9	false
9382	pp	Q9D6R2 (pp) P70404	false
9383	pp	Q9D6R2 (pp) P16054	false
9384	pp	Q9D6R2 (pp) Q8BWF0	false
9385	pp	Q9D6R2 (pp) Q91VR2	false
9386	pp	Q9D6R2 (pp) Q8K3J1	false
9387	pp	Q9D6R2 (pp) Q60597	false
9388	pp	Q9D6R2 (pp) P54071	false
9389	pp	Q9D6R2 (pp) Q9D2G2	false
9390	pp	Q9D6R2 (pp) Q9WUM5	false
9391	pp	P54071 (pp) P06151	false
9392	pp	P54071 (pp) Q60597	false
9393	pp	P54071 (pp) P70404	false
9394	pp	Q9DB20 (pp) Q9CQH3	false
9395	pp	Q9DB20 (pp) P67778	false
9396	pp	Q9DB20 (pp) Q9DCX2	false
9397	pp	Q9DB20 (pp) O09111	false
9398	pp	Q9DB20 (pp) Q9D6J5	false
9399	pp	Q9DB20 (pp) Q99LX0	false
9400	pp	Q9DB20 (pp) Q9DCJ5	false
9401	pp	Q9DB20 (pp) Q9CPP6	false
9402	pp	Q9DB20 (pp) P99029	false
9403	pp	Q9DB20 (pp) Q9CQ69	false
9404	pp	Q9DB20 (pp) Q9CR68	false
9405	pp	Q9DB20 (pp) P97807	false
9406	pp	Q9DB20 (pp) Q9CZ13	false
9407	pp	Q9DB20 (pp) Q9D6J6	false
9408	pp	Q9DB20 (pp) P19783	false
9409	pp	Q9DB20 (pp) P56391	false
9410	pp	Q9DB20 (pp) Q3UIU2	false
9411	pp	Q9DB20 (pp) Q9DC69	false
9412	pp	Q9DB20 (pp) Q9CQQ7	false
9413	pp	Q9DB20 (pp) P62073	false
9414	pp	Q9DB20 (pp) Q9ERS2	false
9415	pp	Q9DB20 (pp) Q9D3D9	false
9416	pp	Q9DB20 (pp) Q91YT0	false
9417	pp	Q9DB20 (pp) Q9WUM5	false
9418	pp	Q9DB20 (pp) P17751	false
9419	pp	Q9DB20 (pp) Q78IK2	false
9420	pp	Q9DB20 (pp) Q8K3J1	false
9421	pp	Q9DB20 (pp) Q06185	false
9422	pp	Q9DB20 (pp) Q91VM9	false
9423	pp	Q9DB20 (pp) Q9DCS9	false
9424	pp	Q9DB20 (pp) P43024	false
9425	pp	Q9DB20 (pp) P56480	false
9426	pp	Q9DB20 (pp) Q03265	false
9427	pp	Q9DB20 (pp) Q9Z1P6	false
9428	pp	Q9DB20 (pp) Q9CPQ8	false
9429	pp	Q9DB20 (pp) Q91VR2	false
9430	pp	Q9DB20 (pp) Q9DB77	false
9431	pp	Q9CQH3 (pp) Q9D6J6	false
9432	pp	Q3UHD9 (pp) Q9Z2H5	false
9433	pp	Q9Z2H5 (pp) Q99N28	false
9434	pp	Q6P9K8 (pp) O88952	false
9435	pp	Q6P9K8 (pp) O70589	false
9436	pp	O88952 (pp) P60469	false
9437	pp	O88952 (pp) O70589	false
9438	pp	P19783 (pp) Q9CQH3	false
9439	pp	P19783 (pp) Q9CQ69	false
9440	pp	P19783 (pp) Q9CR68	false
9441	pp	P19783 (pp) P19536	false
9442	pp	P19783 (pp) Q9D3D9	false
9443	pp	P19783 (pp) Q91YT0	false
9444	pp	P19783 (pp) Q06185	false
9445	pp	P19783 (pp) Q91VR2	false
9446	pp	P19783 (pp) Q9ERS2	false
9447	pp	P19783 (pp) P17665	false
9448	pp	P19783 (pp) Q9DCX2	false
9449	pp	P19783 (pp) Q99LX0	false
9450	pp	P19783 (pp) Q9CQQ7	false
9451	pp	P19783 (pp) P56391	false
9452	pp	P19783 (pp) P43024	false
9453	pp	P19783 (pp) P00405	false
9454	pp	P19783 (pp) Q9DCJ5	false
9455	pp	P19783 (pp) P48771	false
9456	pp	P19783 (pp) Q9DC69	false
9457	pp	Q8BK64 (pp) P63038	false
9458	pp	Q8BK64 (pp) Q60864	false
9459	pp	Q8BK64 (pp) P07901	false
9460	pp	Q8BK64 (pp) Q61699	false
9461	pp	Q8BK64 (pp) P11499	false
9462	pp	P63038 (pp) P52196	false
9463	pp	P63038 (pp) P09411	false
9464	pp	P63038 (pp) Q99LC5	false
9465	pp	P63038 (pp) P52480	false
9466	pp	P63038 (pp) P15105	false
9467	pp	P63038 (pp) Q9WUM5	false
9468	pp	P63038 (pp) Q9Z0X1	false
9469	pp	P63038 (pp) Q6PB66	false
9470	pp	P63038 (pp) Q8BIJ6	false
9471	pp	P63038 (pp) P63037	false
9472	pp	P63038 (pp) Q925I1	false
9473	pp	P63038 (pp) Q8CGK3	false
9474	pp	P63038 (pp) Q921G7	false
9475	pp	P63038 (pp) Q91VR2	false
9476	pp	P63038 (pp) Q61699	false
9477	pp	P63038 (pp) P17156	false
9478	pp	P63038 (pp) O35658	false
9479	pp	P63038 (pp) P67778	false
9480	pp	P63038 (pp) P97807	false
9481	pp	Q8BH95 (pp) Q9CZ13	false
9482	pp	Q8BH95 (pp) Q8BWT1	false
9483	pp	Q8BH95 (pp) Q8QZT1	false
9484	pp	Q8BH95 (pp) P51174	false
9485	pp	Q8BH95 (pp) P50544	false
9486	pp	Q8BH95 (pp) Q9JHI5	false
9487	pp	Q8BH95 (pp) Q8BMS1	false
9488	pp	Q8BH95 (pp) Q99MN9	false
9489	pp	Q8BH95 (pp) O08756	false
9490	pp	Q8BH95 (pp) Q61425	false
9491	pp	Q8BH95 (pp) Q99JY0	false
9492	pp	Q8BH95 (pp) Q99MR8	false
9493	pp	Q8BH95 (pp) Q9DCJ5	false
9494	pp	Q8BH95 (pp) Q9WUM5	false
9495	pp	Q8BH95 (pp) Q9CQ62	false
9496	pp	Q8BH95 (pp) Q99LC5	false
9497	pp	Q8BH95 (pp) Q9DC69	false
9498	pp	Q8BH95 (pp) Q9DBL1	false
9499	pp	Q9CZ13 (pp) Q9ERS2	false
9500	pp	Q9CZ13 (pp) Q9DCS9	false
9501	pp	Q9CZ13 (pp) P97807	false
9502	pp	Q9CZ13 (pp) P67778	false
9503	pp	Q9CZ13 (pp) Q91VD9	false
9504	pp	Q9CZ13 (pp) Q9D3D9	false
9505	pp	Q9CZ13 (pp) Q91YT0	false
9506	pp	Q9CZ13 (pp) O09111	false
9507	pp	Q9CZ13 (pp) Q8K1Z0	false
9508	pp	Q9CZ13 (pp) Q60597	false
9509	pp	Q9CZ13 (pp) Q9CQ69	false
9510	pp	Q9CZ13 (pp) Q9DCJ5	false
9511	pp	Q9CZ13 (pp) Q9Z1P6	false
9512	pp	Q9CZ13 (pp) Q9WUM5	false
9513	pp	Q9CZ13 (pp) P19783	false
9514	pp	Q9CZ13 (pp) Q9D6J6	false
9515	pp	Q9CZ13 (pp) Q91VR2	false
9516	pp	Q9CZ13 (pp) Q8K3J1	false
9517	pp	Q9CZ13 (pp) Q9CQH3	false
9518	pp	Q9CZ13 (pp) Q99P72	false
9519	pp	Q9CZ13 (pp) Q9DC69	false
9520	pp	Q9CZ13 (pp) Q9DB77	false
9521	pp	Q9CZ13 (pp) Q9CR68	false
9522	pp	Q9CZ13 (pp) Q99LY9	false
9523	pp	Q9D0M3 (pp) Q9DB20	false
9524	pp	Q9D0M3 (pp) P62897	false
9525	pp	Q9D0M3 (pp) P70404	false
9526	pp	Q9D0M3 (pp) O09111	false
9527	pp	Q9D0M3 (pp) P97807	false
9528	pp	Q9D0M3 (pp) Q9D3D9	false
9529	pp	Q9D0M3 (pp) Q9ERS2	false
9530	pp	Q9D0M3 (pp) Q9CQZ6	false
9531	pp	Q9D0M3 (pp) Q9CQ69	false
9532	pp	Q9D0M3 (pp) P97450	false
9533	pp	Q9D0M3 (pp) Q06185	false
9534	pp	Q9D0M3 (pp) Q9WUM5	false
9535	pp	Q9D0M3 (pp) Q91VD9	false
9536	pp	Q9D0M3 (pp) P17751	false
9537	pp	Q9D0M3 (pp) Q9DB77	false
9538	pp	Q9D0M3 (pp) P19536	false
9539	pp	Q9D0M3 (pp) Q91VR2	false
9540	pp	Q9D0M3 (pp) P50516	false
9541	pp	Q9D0M3 (pp) Q9DCX2	false
9542	pp	Q9D0M3 (pp) Q9CR68	false
9543	pp	Q9D0M3 (pp) Q91YT0	false
9544	pp	Q9D0M3 (pp) Q9D6J6	false
9545	pp	Q9D0M3 (pp) P62073	false
9546	pp	Q9D0M3 (pp) Q8K3J1	false
9547	pp	Q9D0M3 (pp) Q64521	false
9548	pp	Q9D0M3 (pp) P56391	false
9549	pp	Q9D0M3 (pp) Q8VEM8	false
9550	pp	Q9D0M3 (pp) P42125	false
9551	pp	Q9D0M3 (pp) Q99LC3	false
9552	pp	Q9D0M3 (pp) Q99LX0	false
9553	pp	Q9D0M3 (pp) P43024	false
9554	pp	Q9D0M3 (pp) Q9DC69	false
9555	pp	Q9D0M3 (pp) Q9CQQ7	false
9556	pp	Q9D0M3 (pp) Q9D2G2	false
9557	pp	Q9D0M3 (pp) Q9DCJ5	false
9558	pp	Q9D0M3 (pp) P48771	false
9559	pp	Q9D0M3 (pp) Q9CZ13	false
9560	pp	Q9D0M3 (pp) Q9CQH3	false
9561	pp	Q9D0M3 (pp) Q9Z1P6	false
9562	pp	Q9D0M3 (pp) P00405	false
9563	pp	Q9D0M3 (pp) P19783	false
9564	pp	Q9D0M3 (pp) Q9CPP6	false
9565	pp	Q9D0M3 (pp) Q03265	false
9566	pp	Q9D0M3 (pp) O35658	false
9567	pp	Q9D0M3 (pp) P56480	false
9568	pp	Q99LC3 (pp) Q99LY9	false
9569	pp	Q99LC3 (pp) Q9Z1P6	false
9570	pp	Q99LC3 (pp) Q9DCJ5	false
9571	pp	Q99LC3 (pp) P50516	false
9572	pp	Q99LC3 (pp) O09111	false
9573	pp	Q99LC3 (pp) Q9D6J6	false
9574	pp	Q99LC3 (pp) Q9CQH3	false
9575	pp	Q99LC3 (pp) Q9DB77	false
9576	pp	Q99LC3 (pp) Q91YT0	false
9577	pp	Q99LC3 (pp) Q9CQ54	false
9578	pp	Q99LC3 (pp) Q9DCS9	false
9579	pp	Q99LC3 (pp) Q9CQ69	false
9580	pp	Q99LC3 (pp) Q9DC69	false
9581	pp	Q99LC3 (pp) Q9D3D9	false
9582	pp	Q99LC3 (pp) Q8K3J1	false
9583	pp	Q99LY9 (pp) Q9ERS2	false
9584	pp	Q99LY9 (pp) Q9CQH3	false
9585	pp	Q99LY9 (pp) Q9D6J6	false
9586	pp	Q8BMF4 (pp) Q05920	false
9587	pp	Q8BMF4 (pp) Q8BWT1	false
9588	pp	Q8BMF4 (pp) Q9D2G2	false
9589	pp	Q8BMF4 (pp) P63101	false
9590	pp	Q8BMF4 (pp) Q9WUM5	false
9591	pp	Q8BMF4 (pp) Q99JY0	false
9592	pp	Q8BMF4 (pp) Q922H2	false
9593	pp	Q05920 (pp) P06151	false
9594	pp	Q05920 (pp) P15105	false
9595	pp	P63085 (pp) P35438	false
9596	pp	P63085 (pp) Q64010	false
9597	pp	P63085 (pp) P07901	false
9598	pp	P61027 (pp) Q61598	false
9599	pp	Q61598 (pp) Q91VR2	false
9600	pp	Q61598 (pp) P63011	false
9601	pp	Q61598 (pp) Q99PT1	false
9602	pp	Q61598 (pp) P62821	false
9603	pp	P56480 (pp) P17742	false
9604	pp	P56480 (pp) Q9D2G2	false
9605	pp	P56480 (pp) P63038	false
9606	pp	P56480 (pp) P50516	false
9607	pp	P56480 (pp) P09103	false
9608	pp	P56480 (pp) Q9D3D9	false
9609	pp	P56480 (pp) Q60864	false
9610	pp	P56480 (pp) P03930	false
9611	pp	P56480 (pp) Q06185	false
9612	pp	P56480 (pp) Q99LX0	false
9613	pp	P56480 (pp) Q9WUM5	false
9614	pp	P56480 (pp) P17156	false
9615	pp	P56480 (pp) Q9CZ13	false
9616	pp	P56480 (pp) P19783	false
9617	pp	P56480 (pp) P62259	false
9618	pp	P56480 (pp) P00405	false
9619	pp	P56480 (pp) P56391	false
9620	pp	P56480 (pp) P15105	false
9621	pp	P56480 (pp) O35143	false
9622	pp	P56480 (pp) Q99LC3	false
9623	pp	P56480 (pp) Q8K3J1	false
9624	pp	P56480 (pp) P17182	false
9625	pp	P56480 (pp) Q9DCX2	false
9626	pp	P56480 (pp) Q8VEM8	false
9627	pp	P56480 (pp) Q91VR2	false
9628	pp	P56480 (pp) P16054	false
9629	pp	P56480 (pp) Q91VD9	false
9630	pp	P56480 (pp) Q9D6J6	false
9631	pp	P56480 (pp) Q9CQQ7	false
9632	pp	P56480 (pp) Q91YT0	false
9633	pp	P56480 (pp) Q9CR68	false
9634	pp	P56480 (pp) P97807	false
9635	pp	P56480 (pp) Q03265	false
9636	pp	P68404 (pp) P35438	false
9637	pp	P68404 (pp) P26645	false
9638	pp	P67778 (pp) P50516	false
9639	pp	Q9JLJ2 (pp) Q91VR2	false
9640	pp	Q9JLJ2 (pp) Q9EQ20	false
9641	pp	Q9JLJ2 (pp) Q61425	false
9642	pp	Q9JLJ2 (pp) Q8CHT0	false
9643	pp	Q9JLJ2 (pp) Q8BW75	false
9644	pp	Q9JLJ2 (pp) P61922	false
9645	pp	Q91VR2 (pp) O09111	false
9646	pp	Q91VR2 (pp) Q9CQH3	false
9647	pp	Q91VR2 (pp) Q9D6J6	false
9648	pp	Q9CPQ8 (pp) Q9CQH3	false
9649	pp	Q9CPQ8 (pp) Q9D6J6	false
9650	pp	Q91VD9 (pp) Q9ERS2	false
9651	pp	Q91VD9 (pp) Q9DC69	false
9652	pp	Q91VD9 (pp) Q91YT0	false
9653	pp	Q91VD9 (pp) Q99LY9	false
9654	pp	Q91VD9 (pp) Q3UIU2	false
9655	pp	Q91VD9 (pp) Q99LC5	false
9656	pp	Q91VD9 (pp) Q8K3J1	false
9657	pp	Q91VD9 (pp) Q9Z1P6	false
9658	pp	Q91VD9 (pp) Q8BMF4	false
9659	pp	Q91VD9 (pp) Q9DCJ5	false
9660	pp	Q91VD9 (pp) Q9CQ54	false
9661	pp	Q91VD9 (pp) Q9CQQ7	false
9662	pp	Q91VD9 (pp) P97807	false
9663	pp	Q91VD9 (pp) Q9DB77	false
9664	pp	Q91VD9 (pp) Q99LC3	false
9665	pp	Q91VD9 (pp) Q6PB66	false
9666	pp	Q91VD9 (pp) Q9DCS9	false
9667	pp	Q91VD9 (pp) Q9WUM5	false
9668	pp	Q91VD9 (pp) Q9CR68	false
9669	pp	Q91VD9 (pp) Q9CQH3	false
9670	pp	Q91VD9 (pp) Q91VR2	false
9671	pp	Q91VD9 (pp) Q9CQ69	false
9672	pp	Q91VD9 (pp) O09111	false
9673	pp	Q91VD9 (pp) Q9D2G2	false
9674	pp	Q91VD9 (pp) Q9CQZ6	false
9675	pp	Q91VD9 (pp) Q9D6J6	false
9676	pp	Q9DCS9 (pp) Q9CR68	false
9677	pp	Q9DCS9 (pp) Q9DC69	false
9678	pp	Q9DCS9 (pp) Q9CQQ7	false
9679	pp	Q9DCS9 (pp) Q06185	false
9680	pp	Q9DCS9 (pp) Q9CPQ8	false
9681	pp	Q9DCS9 (pp) Q9D3D9	false
9682	pp	Q9DCS9 (pp) Q9DCX2	false
9683	pp	Q9DCS9 (pp) Q9D6J6	false
9684	pp	Q9DCS9 (pp) Q9ERS2	false
9685	pp	Q9DCS9 (pp) Q9CQ69	false
9686	pp	Q9DCS9 (pp) Q8K3J1	false
9687	pp	Q9DCS9 (pp) Q9DCJ5	false
9688	pp	Q9DCS9 (pp) Q9CQH3	false
9689	pp	Q9DCS9 (pp) O09111	false
9690	pp	Q9CR68 (pp) P43024	false
9691	pp	Q9CR68 (pp) Q9D2G2	false
9692	pp	Q9CR68 (pp) Q06185	false
9693	pp	Q9CR68 (pp) Q9CQQ7	false
9694	pp	Q9CR68 (pp) Q8K3J1	false
9695	pp	Q9CR68 (pp) Q9DCJ5	false
9696	pp	Q9CR68 (pp) Q9WUM5	false
9697	pp	Q9CR68 (pp) Q9ERS2	false
9698	pp	Q9CR68 (pp) Q9D3D9	false
9699	pp	Q9CR68 (pp) P00405	false
9700	pp	Q9CR68 (pp) P56391	false
9701	pp	Q9CR68 (pp) Q9CQ69	false
9702	pp	Q9CR68 (pp) O88441	false
9703	pp	Q9CR68 (pp) P62897	false
9704	pp	Q9CR68 (pp) Q9D6J6	false
9705	pp	Q9CR68 (pp) Q9DC69	false
9706	pp	Q9CR68 (pp) O09111	false
9707	pp	Q9CR68 (pp) Q9DCX2	false
9708	pp	Q9CR68 (pp) Q8VEM8	false
9709	pp	Q9CR68 (pp) Q91VR2	false
9710	pp	Q9CR68 (pp) Q9CQH3	false
9711	pp	Q9CR68 (pp) O35658	false
9712	pp	P05132 (pp) P12367	false
9713	pp	P05132 (pp) P31324	false
9714	pp	P05132 (pp) P35438	false
9715	pp	Q9CQJ8 (pp) Q06185	false
9716	pp	Q9CQJ8 (pp) P19783	false
9717	pp	Q9CQJ8 (pp) Q9DB77	false
9718	pp	Q9CQJ8 (pp) Q9Z1P6	false
9719	pp	Q9CQJ8 (pp) Q9DC69	false
9720	pp	Q9CQJ8 (pp) O09111	false
9721	pp	Q9CQJ8 (pp) Q9DB20	false
9722	pp	Q9CQJ8 (pp) Q9CQ69	false
9723	pp	Q9CQJ8 (pp) Q9DCJ5	false
9724	pp	Q9CQJ8 (pp) P48771	false
9725	pp	Q9CQJ8 (pp) Q9D0M3	false
9726	pp	Q9CQJ8 (pp) Q9D6J6	false
9727	pp	Q9CQJ8 (pp) Q9CQ54	false
9728	pp	Q9CQJ8 (pp) P97450	false
9729	pp	Q9CQJ8 (pp) Q9CZ13	false
9730	pp	Q9CQJ8 (pp) P97807	false
9731	pp	Q9CQJ8 (pp) Q9D023	false
9732	pp	Q9CQJ8 (pp) Q9CQZ6	false
9733	pp	Q9CQJ8 (pp) Q9ERS2	false
9734	pp	Q9CQJ8 (pp) Q99KI0	false
9735	pp	Q9CQJ8 (pp) Q91YT0	false
9736	pp	Q9CQJ8 (pp) Q99LC3	false
9737	pp	Q9CQJ8 (pp) Q9CPP6	false
9738	pp	Q9CQJ8 (pp) Q9CPQ8	false
9739	pp	Q9CQJ8 (pp) P43024	false
9740	pp	Q9CQJ8 (pp) Q9CQC7	false
9741	pp	Q9CQJ8 (pp) Q8K1Z0	false
9742	pp	Q9CQJ8 (pp) Q9CQZ5	false
9743	pp	Q9CQJ8 (pp) Q99LC5	false
9744	pp	Q9CQJ8 (pp) Q8VEM8	false
9745	pp	Q9CQJ8 (pp) Q03265	false
9746	pp	Q9CQJ8 (pp) Q62425	false
9747	pp	Q9CQJ8 (pp) Q9CR68	false
9748	pp	Q9CQJ8 (pp) Q9CQH3	false
9749	pp	Q9CQJ8 (pp) Q99LY9	false
9750	pp	Q9CQJ8 (pp) Q8K3J1	false
9751	pp	Q9CQJ8 (pp) Q9DCX2	false
9752	pp	Q9CQJ8 (pp) Q91VR2	false
9753	pp	Q9CQJ8 (pp) Q9D6J5	false
9754	pp	Q9CQJ8 (pp) Q91VD9	false
9755	pp	Q9CQJ8 (pp) Q9D3D9	false
9756	pp	Q9CQJ8 (pp) P99029	false
9757	pp	Q9CQJ8 (pp) P62073	false
9758	pp	Q9CQJ8 (pp) Q9DCS9	false
9759	pp	Q9CQJ8 (pp) Q9CQQ7	false
9760	pp	Q06185 (pp) Q99LY9	false
9761	pp	Q06185 (pp) Q9D6J6	false
9762	pp	Q06185 (pp) Q9CQH3	false
9763	pp	Q06185 (pp) P56391	false
9764	pp	Q06185 (pp) Q9DCJ5	false
9765	pp	Q06185 (pp) Q9CQ69	false
9766	pp	Q06185 (pp) O09111	false
9767	pp	Q06185 (pp) Q8K3J1	false
9768	pp	Q06185 (pp) Q91VR2	false
9769	pp	Q06185 (pp) Q9D3D9	false
9770	pp	Q06185 (pp) Q9ERS2	false
9771	pp	Q06185 (pp) Q9CQQ7	false
9772	pp	Q06185 (pp) Q9DCX2	false
9773	pp	Q06185 (pp) P03930	false
9774	pp	Q9DC70 (pp) Q9D0S9	false
9775	pp	Q9DC70 (pp) Q03265	false
9776	pp	Q9DC70 (pp) Q9CQZ5	false
9777	pp	Q9DC70 (pp) Q8K2B3	false
9778	pp	Q9DC70 (pp) P62073	false
9779	pp	Q9DC70 (pp) Q9Z1P6	false
9780	pp	Q9DC70 (pp) P42125	false
9781	pp	Q9DC70 (pp) Q9CQH3	false
9782	pp	Q9DC70 (pp) P56391	false
9783	pp	Q9DC70 (pp) P52503	false
9784	pp	Q9DC70 (pp) P97450	false
9785	pp	Q9DC70 (pp) Q99LC3	false
9786	pp	Q9DC70 (pp) Q99KI0	false
9787	pp	Q9DC70 (pp) P17751	false
9788	pp	Q9DC70 (pp) Q9D0M3	false
9789	pp	Q9DC70 (pp) Q9DCJ5	false
9790	pp	Q9DC70 (pp) Q9DCX2	false
9791	pp	Q9DC70 (pp) Q9D855	false
9792	pp	Q9DC70 (pp) Q9DB20	false
9793	pp	Q9DC70 (pp) Q3UIU2	false
9794	pp	Q9DC70 (pp) Q9CR68	false
9795	pp	Q9DC70 (pp) Q91YT0	false
9796	pp	Q9DC70 (pp) Q9CPP6	false
9797	pp	Q9DC70 (pp) P56480	false
9798	pp	Q9DC70 (pp) P70404	false
9799	pp	Q9DC70 (pp) Q9ERS2	false
9800	pp	Q9DC70 (pp) Q9CQJ8	false
9801	pp	Q9DC70 (pp) Q8K3J1	false
9802	pp	Q9DC70 (pp) Q9CQ69	false
9803	pp	Q9DC70 (pp) O09111	false
9804	pp	Q9DC70 (pp) O08756	false
9805	pp	Q9DC70 (pp) Q9D3D9	false
9806	pp	Q9DC70 (pp) Q9DCS9	false
9807	pp	Q9DC70 (pp) Q91VR2	false
9808	pp	Q9DC70 (pp) Q91Z53	false
9809	pp	Q9DC70 (pp) P19783	false
9810	pp	Q9DC70 (pp) Q91VD9	false
9811	pp	Q9DC70 (pp) Q91VT4	false
9812	pp	Q9DC70 (pp) Q9CZ13	false
9813	pp	Q9DC70 (pp) Q9D6J6	false
9814	pp	Q9DC70 (pp) Q06185	false
9815	pp	Q9DC70 (pp) Q9CXZ1	false
9816	pp	Q9DC70 (pp) Q9DC69	false
9817	pp	Q9D0S9 (pp) Q91Z53	false
9818	pp	Q9D0S9 (pp) O08756	false
9819	pp	Q9D1K2 (pp) Q9Z1G4	false
9820	pp	Q9D1K2 (pp) P62814	false
9821	pp	Q9D1K2 (pp) P63082	false
9822	pp	Q9D1K2 (pp) Q8K3J1	false
9823	pp	Q9D1K2 (pp) Q9Z1G3	false
9824	pp	Q9D1K2 (pp) Q9WTT4	false
9825	pp	Q9D1K2 (pp) Q9CQZ5	false
9826	pp	Q9D1K2 (pp) P51863	false
9827	pp	Q9D1K2 (pp) Q9CQ75	false
9828	pp	Q9D1K2 (pp) P50516	false
9829	pp	Q9D1K2 (pp) Q91VM9	false
9830	pp	Q9D1K2 (pp) Q9Z1P6	false
9831	pp	Q9D1K2 (pp) Q8BVE3	false
9832	pp	Q9D1K2 (pp) P57746	false
9833	pp	Q9D1K2 (pp) P50518	false
9834	pp	Q9Z1G4 (pp) P50516	false
9835	pp	Q9Z1G4 (pp) Q9WTT4	false
9836	pp	Q9Z1G4 (pp) P63082	false
9837	pp	Q9Z1G4 (pp) Q62277	false
9838	pp	Q9WUM5 (pp) Q9D0K2	false
9839	pp	Q9WUM5 (pp) Q9DC69	false
9840	pp	Q9WUM5 (pp) Q9CQQ7	false
9841	pp	Q9WUM5 (pp) Q9DCJ5	false
9842	pp	Q9WUM5 (pp) P06151	false
9843	pp	Q9WUM5 (pp) Q9D6J6	false
9844	pp	Q9WUM5 (pp) Q91VR2	false
9845	pp	Q9WUM5 (pp) Q99JY0	false
9846	pp	Q9WUM5 (pp) Q60597	false
9847	pp	Q9WUM5 (pp) Q99LX0	false
9848	pp	Q9WUM5 (pp) Q9ERS2	false
9849	pp	Q9WUM5 (pp) Q9CQH3	false
9850	pp	Q9WUM5 (pp) Q60931	false
9851	pp	Q9WUM5 (pp) Q8VEM8	false
9852	pp	Q9CQN1 (pp) P63037	false
9853	pp	Q9CQN1 (pp) Q8K3J1	false
9854	pp	Q9CQN1 (pp) Q91YT0	false
9855	pp	Q9CQN1 (pp) P63038	false
9856	pp	P63037 (pp) Q91VR2	false
9857	pp	P63037 (pp) Q61699	false
9858	pp	Q9DCW4 (pp) Q9CPP6	false
9859	pp	Q9DCW4 (pp) Q9DCJ5	false
9860	pp	Q9DCW4 (pp) P56391	false
9861	pp	Q9DCW4 (pp) P51174	false
9862	pp	Q9DCW4 (pp) Q9DB20	false
9863	pp	Q9DCW4 (pp) Q9D3D9	false
9864	pp	Q9DCW4 (pp) Q8JZN5	false
9865	pp	Q9DCW4 (pp) Q9CQA3	false
9866	pp	Q9DCW4 (pp) Q9Z2I9	false
9867	pp	Q9DCW4 (pp) Q06185	false
9868	pp	Q9DCW4 (pp) O09111	false
9869	pp	Q9DCW4 (pp) Q9D6J5	false
9870	pp	Q9DCW4 (pp) Q91YT0	false
9871	pp	Q9DCW4 (pp) Q9ERS2	false
9872	pp	Q9DCW4 (pp) Q8BMS1	false
9873	pp	Q9DCW4 (pp) Q8K3J1	false
9874	pp	Q9DCW4 (pp) P08249	false
9875	pp	Q9DCW4 (pp) P17751	false
9876	pp	Q9DCW4 (pp) Q91Z53	false
9877	pp	Q9DCW4 (pp) Q9WUM5	false
9878	pp	Q9DCW4 (pp) P42125	false
9879	pp	Q9DCW4 (pp) Q9DBL1	false
9880	pp	Q9DCW4 (pp) Q921G7	false
9881	pp	Q9DCW4 (pp) Q99LC3	false
9882	pp	Q9DCW4 (pp) Q80U28	false
9883	pp	Q9DCW4 (pp) P19783	false
9884	pp	Q9DCW4 (pp) Q9DC69	false
9885	pp	Q9DCW4 (pp) Q99LC5	false
9886	pp	Q9DCW4 (pp) P52503	false
9887	pp	Q9DCW4 (pp) Q9CQJ8	false
9888	pp	Q9DCW4 (pp) Q8BH95	false
9889	pp	Q9DCW4 (pp) Q9DCT2	false
9890	pp	Q9DCW4 (pp) Q9JHI5	false
9891	pp	Q9DCW4 (pp) O08756	false
9892	pp	Q9DCW4 (pp) Q8BWT1	false
9893	pp	Q9DCW4 (pp) Q9DCS9	false
9894	pp	Q9DCW4 (pp) Q61425	false
9895	pp	Q9DCW4 (pp) Q9Z1P6	false
9896	pp	Q9DCW4 (pp) Q9D6J6	false
9897	pp	Q9DCW4 (pp) Q9D0S9	false
9898	pp	Q9DCW4 (pp) Q8QZT1	false
9899	pp	Q9DCW4 (pp) Q9DC70	false
9900	pp	Q9DCW4 (pp) Q8R4N0	false
9901	pp	Q9DCW4 (pp) P50544	false
9902	pp	Q9CPP6 (pp) Q9D6J6	false
9903	pp	Q9CPP6 (pp) Q9DB77	false
9904	pp	Q9CPP6 (pp) Q9DCX2	false
9905	pp	Q9CPP6 (pp) P48771	false
9906	pp	Q9CPP6 (pp) Q9DCJ5	false
9907	pp	Q9CPP6 (pp) Q99LY9	false
9908	pp	Q9CPP6 (pp) Q9ERS2	false
9909	pp	Q9CPP6 (pp) Q9CQZ6	false
9910	pp	Q9CPP6 (pp) Q91VD9	false
9911	pp	Q9CPP6 (pp) Q8K3J1	false
9912	pp	Q9CPP6 (pp) Q9CQ69	false
9913	pp	Q9CPP6 (pp) Q99LC5	false
9914	pp	Q9CPP6 (pp) Q9D6J5	false
9915	pp	Q9CPP6 (pp) Q9CQH3	false
9916	pp	Q9CPP6 (pp) Q9WUM5	false
9917	pp	Q9CPP6 (pp) Q9Z1P6	false
9918	pp	Q9CPP6 (pp) P56391	false
9919	pp	Q9CPP6 (pp) P43024	false
9920	pp	Q9CPP6 (pp) Q91YT0	false
9921	pp	P46460 (pp) Q01097	false
9922	pp	P46460 (pp) Q9CWZ7	false
9923	pp	P46460 (pp) Q62442	false
9924	pp	P46460 (pp) O08599	false
9925	pp	P46460 (pp) O35526	false
9926	pp	P46460 (pp) P35438	false
9927	pp	P46460 (pp) P23819	false
9928	pp	P46460 (pp) P63101	false
9929	pp	Q08331 (pp) Q9CQ62	false
9930	pp	Q08331 (pp) Q01097	false
9931	pp	Q9CQ62 (pp) Q99JY0	false
9932	pp	Q9CQ62 (pp) Q8BWT1	false
9933	pp	Q9CQ62 (pp) Q99LC5	false
9934	pp	Q9CQ62 (pp) P19096	false
9935	pp	Q9CQ62 (pp) P41216	false
9936	pp	Q9D2G2 (pp) Q91VR2	false
9937	pp	Q9D2G2 (pp) Q9WUM5	false
9938	pp	Q9D2G2 (pp) Q60597	false
9939	pp	Q9D2G2 (pp) Q9D3D9	false
9940	pp	Q3UIU2 (pp) Q9D6J6	false
9941	pp	Q3UIU2 (pp) Q9CQH3	false
9942	pp	P31938 (pp) P63085	false
9943	pp	P31938 (pp) P35438	false
9944	pp	P31938 (pp) P16054	false
9945	pp	P17427 (pp) P17426	false
9946	pp	P17427 (pp) Q68FD5	false
9947	pp	P17427 (pp) O08585	false
9948	pp	P17427 (pp) Q80VP1	false
9949	pp	P17427 (pp) P62743	false
9950	pp	P17427 (pp) P39053	false
9951	pp	P17427 (pp) Q8CHC4	false
9952	pp	P17427 (pp) Q6IRU5	false
9953	pp	P17427 (pp) P84091	false
9954	pp	P17427 (pp) Q9DBG3	false
9955	pp	P17426 (pp) P62743	false
9956	pp	P17426 (pp) O08585	false
9957	pp	P17426 (pp) Q80VP1	false
9958	pp	P17426 (pp) Q8CHC4	false
9959	pp	P57746 (pp) P50516	false
9960	pp	P57746 (pp) Q8BVE3	false
9961	pp	P57746 (pp) Q9Z1G4	false
9962	pp	P57746 (pp) Q9CQZ6	false
9963	pp	P57746 (pp) P97450	false
9964	pp	P57746 (pp) Q9Z1G3	false
9965	pp	P57746 (pp) Q9WTT4	false
9966	pp	P57746 (pp) P23506	false
9967	pp	P57746 (pp) P63082	false
9968	pp	P57746 (pp) Q9CQH3	false
9969	pp	P50516 (pp) Q9JHU4	false
9970	pp	P50516 (pp) Q9R0K7	false
9971	pp	P50516 (pp) Q8BPN8	false
9972	pp	P50516 (pp) P60710	false
9973	pp	P50516 (pp) Q7TPR4	false
9974	pp	P50516 (pp) P39053	false
9975	pp	P50516 (pp) Q7TQF7	false
9976	pp	P50516 (pp) P53395	false
9977	pp	P50516 (pp) P55088	false
9978	pp	P50516 (pp) Q9D6J6	false
9979	pp	P50516 (pp) P46460	false
9980	pp	P50516 (pp) P46660	false
9981	pp	P50516 (pp) Q9QYR6	false
9982	pp	P50516 (pp) P01831	false
9983	pp	P50516 (pp) P28660	false
9984	pp	P50516 (pp) Q9D6R2	false
9985	pp	P50516 (pp) P47754	false
9986	pp	P50516 (pp) Q5SQX6	false
9987	pp	P50516 (pp) Q5DQR4	false
9988	pp	P50516 (pp) O35643	false
9989	pp	P50516 (pp) Q9Z2I0	false
9990	pp	P50516 (pp) Q62425	false
9991	pp	P50516 (pp) P63082	false
9992	pp	P50516 (pp) O08539	false
9993	pp	P50516 (pp) Q9JLM8	false
9994	pp	P50516 (pp) Q8VD37	false
9995	pp	P50516 (pp) P17427	false
9996	pp	P50516 (pp) Q99LX0	false
9997	pp	P50516 (pp) Q80XN0	false
9998	pp	P50516 (pp) O54983	false
9999	pp	P50516 (pp) P17426	false
10000	pp	P50516 (pp) Q9Z0E0	false
10001	pp	P50516 (pp) Q9Z1J3	false
10002	pp	P50516 (pp) Q3UHL1	false
10003	pp	P50516 (pp) Q91VR2	false
10004	pp	P50516 (pp) P12382	false
10005	pp	P50516 (pp) P08553	false
10006	pp	P70404 (pp) Q91VR2	false
10007	pp	P70404 (pp) Q9WUM5	false
10008	pp	P70404 (pp) Q9DC69	false
10009	pp	P70404 (pp) Q60597	false
10010	pp	P70404 (pp) Q9D2G2	false
10011	pp	O88441 (pp) Q9D6J6	false
10012	pp	O88441 (pp) Q9CQH3	false
10013	pp	O88441 (pp) Q6PB66	false
10014	pp	Q7TQI3 (pp) P68510	false
10015	pp	P17751 (pp) P06745	false
10016	pp	P17751 (pp) P05063	false
10017	pp	P17751 (pp) P17182	false
10018	pp	P17751 (pp) Q99LX0	false
10019	pp	P17751 (pp) P09411	false
10020	pp	P17751 (pp) Q93092	false
10021	pp	P17751 (pp) Q9CZ13	false
10022	pp	P17751 (pp) Q9D6J6	false
10023	pp	P17751 (pp) P56480	false
10024	pp	P17751 (pp) Q91VD9	false
10025	pp	P17751 (pp) P70296	false
10026	pp	P17751 (pp) Q9D2G2	false
10027	pp	P17751 (pp) Q64521	false
10028	pp	P17751 (pp) P47857	false
10029	pp	P17751 (pp) P16858	false
10030	pp	P17751 (pp) Q9WUM5	false
10031	pp	P17751 (pp) P23506	false
10032	pp	P17751 (pp) P99029	false
10033	pp	P17751 (pp) Q8K3J1	false
10034	pp	P17751 (pp) P97807	false
10035	pp	P17751 (pp) Q03265	false
10036	pp	P17751 (pp) P05064	false
10037	pp	P17751 (pp) Q9CR68	false
10038	pp	P17751 (pp) Q9WUA3	false
10039	pp	P17751 (pp) Q91VR2	false
10040	pp	P17751 (pp) P63101	false
10041	pp	P17751 (pp) P52480	false
10042	pp	P17751 (pp) P06151	false
10043	pp	P17751 (pp) Q9R0P5	false
10044	pp	P17751 (pp) Q91YT0	false
10045	pp	P09411 (pp) Q9DCD0	false
10046	pp	P09411 (pp) P17182	false
10047	pp	P09411 (pp) P17742	false
10048	pp	P09411 (pp) P16858	false
10049	pp	P09411 (pp) P06151	false
10050	pp	Q9Z1P6 (pp) Q9D6J6	false
10051	pp	Q9Z1P6 (pp) Q9ERS2	false
10052	pp	Q9Z1P6 (pp) P56391	false
10053	pp	Q9Z1P6 (pp) Q3UIU2	false
10054	pp	Q9Z1P6 (pp) Q9D3D9	false
10055	pp	Q9Z1P6 (pp) Q9DC69	false
10056	pp	Q9Z1P6 (pp) Q9CPQ8	false
10057	pp	Q9Z1P6 (pp) Q99LX0	false
10058	pp	Q9Z1P6 (pp) Q9CQ69	false
10059	pp	Q9Z1P6 (pp) Q9CQH3	false
10060	pp	Q9Z1P6 (pp) Q9DCJ5	false
10061	pp	Q9Z1P6 (pp) Q8K3J1	false
10062	pp	Q9Z1P6 (pp) Q06185	false
10063	pp	Q9Z1P6 (pp) O08756	false
10064	pp	Q9Z1P6 (pp) Q9DCS9	false
10065	pp	Q9Z1P6 (pp) Q91YT0	false
10066	pp	Q9Z1P6 (pp) Q9DCX2	false
10067	pp	Q9Z1P6 (pp) O09111	false
10068	pp	P63137 (pp) P62812	false
10069	pp	P62812 (pp) P63328	false
10070	pp	P62812 (pp) P22723	false
10071	pp	O70325 (pp) Q99LX0	false
10072	pp	O70325 (pp) Q9D3D9	false
10073	pp	O70325 (pp) Q9ERS2	false
10074	pp	O70325 (pp) P99029	false
10075	pp	P48771 (pp) Q9DC69	false
10076	pp	P48771 (pp) Q91VR2	false
10077	pp	P48771 (pp) P56391	false
10078	pp	P48771 (pp) Q99LX0	false
10079	pp	P48771 (pp) Q06185	false
10080	pp	P48771 (pp) Q9D6J6	false
10081	pp	P48771 (pp) Q9CQH3	false
10082	pp	P48771 (pp) Q9CQ69	false
10083	pp	P48771 (pp) P43024	false
10084	pp	Q64133 (pp) P47738	false
10085	pp	Q64133 (pp) Q9JLJ2	false
10086	pp	Q64133 (pp) Q9CZS1	false
10087	pp	Q64133 (pp) Q9DBF1	false
10088	pp	P47738 (pp) P61922	false
10089	pp	P47738 (pp) Q8CHT0	false
10090	pp	P47738 (pp) Q9EQ20	false
10091	pp	P47738 (pp) Q8BW75	false
10092	pp	P63005 (pp) Q6PER3	false
10093	pp	P63005 (pp) O08788	false
10094	pp	P63005 (pp) Q99KJ8	false
10095	pp	P63005 (pp) P20357	false
10096	pp	Q6PER3 (pp) O08788	false
10097	pp	O70161 (pp) Q9Z1B3	false
10098	pp	O70161 (pp) P17426	false
10099	pp	O70161 (pp) Q71LX4	false
10100	pp	Q9Z1B3 (pp) Q01097	false
10101	pp	Q9Z1B3 (pp) P35438	false
10102	pp	Q921G7 (pp) Q8BWT1	false
10103	pp	Q921G7 (pp) Q61425	false
10104	pp	Q921G7 (pp) Q8BMS1	false
10105	pp	Q921G7 (pp) Q9D6J6	false
10106	pp	Q921G7 (pp) Q99JY0	false
10107	pp	Q921G7 (pp) Q9WUM5	false
10108	pp	Q921G7 (pp) Q80U28	false
10109	pp	Q921G7 (pp) Q9CQ62	false
10110	pp	Q921G7 (pp) Q99LC5	false
10111	pp	Q8BWT1 (pp) Q9D0K2	false
10112	pp	Q8BWT1 (pp) Q9DBL1	false
10113	pp	Q8BWT1 (pp) Q9EQ20	false
10114	pp	Q8BWT1 (pp) Q99JY0	false
10115	pp	Q8BWT1 (pp) Q8BMS1	false
10116	pp	Q8BWT1 (pp) Q9WUM5	false
10117	pp	Q8BWT1 (pp) O08756	false
10118	pp	Q8BWT1 (pp) Q91ZA3	false
10119	pp	Q9CQA3 (pp) Q9D0M3	false
10120	pp	Q9CQA3 (pp) Q9CZ13	false
10121	pp	Q9CQA3 (pp) Q06185	false
10122	pp	Q9CQA3 (pp) Q8K3J1	false
10123	pp	Q9CQA3 (pp) Q9Z2I9	false
10124	pp	Q9CQA3 (pp) Q9Z1P6	false
10125	pp	Q9CQA3 (pp) Q9DCS9	false
10126	pp	Q9CQA3 (pp) Q9CQZ6	false
10127	pp	Q9CQA3 (pp) Q9D2G2	false
10128	pp	Q9CQA3 (pp) Q9DCJ5	false
10129	pp	Q9CQA3 (pp) P54071	false
10130	pp	Q9CQA3 (pp) Q99KI0	false
10131	pp	Q9CQA3 (pp) Q9CQ62	false
10132	pp	Q9CQA3 (pp) Q9DB20	false
10133	pp	Q9CQA3 (pp) Q9D855	false
10134	pp	Q9CQA3 (pp) P97807	false
10135	pp	Q9CQA3 (pp) P70404	false
10136	pp	Q9CQA3 (pp) Q9CPQ1	false
10137	pp	Q9CQA3 (pp) Q9CQH3	false
10138	pp	Q9CQA3 (pp) P52503	false
10139	pp	Q9CQA3 (pp) Q9DC69	false
10140	pp	Q9CQA3 (pp) Q9WUM5	false
10141	pp	Q9CQA3 (pp) Q9D6J5	false
10142	pp	Q9CQA3 (pp) P56391	false
10143	pp	Q9CQA3 (pp) Q9DB77	false
10144	pp	Q9CQA3 (pp) Q9CQ75	false
10145	pp	Q9CQA3 (pp) Q8K2B3	false
10146	pp	Q9CQA3 (pp) Q9CR68	false
10147	pp	Q9CQA3 (pp) Q91VD9	false
10148	pp	Q9CQA3 (pp) Q9D6J6	false
10149	pp	Q9CQA3 (pp) P20108	false
10150	pp	Q9CQA3 (pp) Q9CQZ5	false
10151	pp	Q9CQA3 (pp) Q99LC5	false
10152	pp	Q9CQA3 (pp) Q9CQQ7	false
10153	pp	Q9CQA3 (pp) Q7TMF3	false
10154	pp	Q9CQA3 (pp) Q03265	false
10155	pp	Q9CQA3 (pp) Q91VR2	false
10156	pp	Q9CQA3 (pp) Q61425	false
10157	pp	Q9CQA3 (pp) Q64521	false
10158	pp	Q9CQA3 (pp) Q8VEM8	false
10159	pp	Q9CQA3 (pp) Q91YT0	false
10160	pp	Q9CQA3 (pp) Q9DCX2	false
10161	pp	Q9CQA3 (pp) P56480	false
10162	pp	Q9CQA3 (pp) P97450	false
10163	pp	Q9CQA3 (pp) Q9DCD0	false
10164	pp	Q9CQA3 (pp) Q9CPP6	false
10165	pp	Q9CQA3 (pp) Q91WD5	false
10166	pp	Q9CQA3 (pp) P19783	false
10167	pp	Q9CQA3 (pp) Q9D6R2	false
10168	pp	Q9CQA3 (pp) Q9DC70	false
10169	pp	Q9CQA3 (pp) Q9CQ69	false
10170	pp	Q9CQA3 (pp) P17751	false
10171	pp	Q9CQA3 (pp) P43024	false
10172	pp	Q9CQA3 (pp) O09111	false
10173	pp	Q9CQA3 (pp) Q9D3D9	false
10174	pp	Q9CQA3 (pp) Q99LX0	false
10175	pp	Q9CQA3 (pp) P19536	false
10176	pp	Q9CQA3 (pp) P99029	false
10177	pp	Q9CQA3 (pp) Q9ERS2	false
10178	pp	Q9CQA3 (pp) Q9CQJ8	false
10179	pp	Q9CQA3 (pp) P08249	false
10180	pp	Q9CQA3 (pp) Q60597	false
10181	pp	P12787 (pp) Q9CR68	false
10182	pp	P12787 (pp) P52503	false
10183	pp	P12787 (pp) Q9D6R2	false
10184	pp	P12787 (pp) Q9DCS9	false
10185	pp	P12787 (pp) Q99LC5	false
10186	pp	P12787 (pp) Q9D3D9	false
10187	pp	P12787 (pp) Q8K3J1	false
10188	pp	P12787 (pp) Q7TMF3	false
10189	pp	P12787 (pp) Q8VEM8	false
10190	pp	P12787 (pp) P17665	false
10191	pp	P12787 (pp) Q9DC69	false
10192	pp	P12787 (pp) Q9DCW4	false
10193	pp	P12787 (pp) P97450	false
10194	pp	P12787 (pp) Q9DCT2	false
10195	pp	P12787 (pp) P56391	false
10196	pp	P12787 (pp) Q9ERS2	false
10197	pp	P12787 (pp) P19783	false
10198	pp	P12787 (pp) Q9CQQ7	false
10199	pp	P12787 (pp) Q9D6J6	false
10200	pp	P12787 (pp) Q9DB20	false
10201	pp	P12787 (pp) P00405	false
10202	pp	P12787 (pp) Q9CQZ5	false
10203	pp	P12787 (pp) Q9DCJ5	false
10204	pp	P12787 (pp) Q9D0M3	false
10205	pp	P12787 (pp) Q9D6J5	false
10206	pp	P12787 (pp) Q9CQ69	false
10207	pp	P12787 (pp) Q9CQJ8	false
10208	pp	P12787 (pp) Q9CPQ1	false
10209	pp	P12787 (pp) Q9DC70	false
10210	pp	P12787 (pp) Q9CQ54	false
10211	pp	P12787 (pp) Q91VR2	false
10212	pp	P12787 (pp) Q99LC3	false
10213	pp	P12787 (pp) Q9DCX2	false
10214	pp	P12787 (pp) Q9CQH3	false
10215	pp	P12787 (pp) P09671	false
10216	pp	P12787 (pp) Q03265	false
10217	pp	P12787 (pp) Q9D855	false
10218	pp	P12787 (pp) Q9CQA3	false
10219	pp	P12787 (pp) Q9DB77	false
10220	pp	P12787 (pp) P43024	false
10221	pp	P12787 (pp) P19536	false
10222	pp	P12787 (pp) Q9CQZ6	false
10223	pp	P12787 (pp) Q9CXZ1	false
10224	pp	P12787 (pp) Q06185	false
10225	pp	P12787 (pp) P56480	false
10226	pp	Q61425 (pp) Q99LC5	false
10227	pp	Q61425 (pp) Q9WUM5	false
10228	pp	Q61425 (pp) Q9DBL1	false
10229	pp	Q61425 (pp) Q9D0K2	false
10230	pp	Q61425 (pp) Q9CZS1	false
10231	pp	Q61425 (pp) Q8BMS1	false
10232	pp	Q61425 (pp) Q9CQ62	false
10233	pp	Q61425 (pp) Q8BWT1	false
10234	pp	Q61425 (pp) Q99JY0	false
10235	pp	Q61425 (pp) O08756	false
10236	pp	Q61425 (pp) P47738	false
10237	pp	Q61425 (pp) Q8QZT1	false
10238	pp	Q61425 (pp) Q9EQ20	false
10239	pp	Q99LC5 (pp) O09111	false
10240	pp	Q99LC5 (pp) P50544	false
10241	pp	Q99LC5 (pp) Q9D6J6	false
10242	pp	Q99LC5 (pp) Q9DCJ5	false
10243	pp	Q99LC5 (pp) Q6PB66	false
10244	pp	Q99LC5 (pp) Q91ZJ5	false
10245	pp	Q99LC5 (pp) Q9CQH3	false
10246	pp	Q99LC5 (pp) Q80U28	false
10247	pp	Q99LC5 (pp) Q91VR2	false
10248	pp	Q99LC5 (pp) Q9DBL1	false
10249	pp	Q99LC5 (pp) Q99JY0	false
10250	pp	Q99LC5 (pp) O08756	false
10251	pp	Q99LC5 (pp) Q91YT0	false
10252	pp	Q99LC5 (pp) Q9Z0X1	false
10253	pp	Q99LC5 (pp) Q8BWT1	false
10254	pp	Q99LC5 (pp) Q9WUM5	false
10255	pp	Q99LC5 (pp) Q9CR68	false
10256	pp	Q99LC5 (pp) O88441	false
10257	pp	Q99LC5 (pp) Q9DC69	false
10258	pp	Q8BGH2 (pp) Q99LX0	false
10259	pp	Q8BGH2 (pp) Q8BH95	false
10260	pp	Q8BGH2 (pp) Q8CAQ8	false
10261	pp	Q8BGH2 (pp) Q9CZ13	false
10262	pp	Q8BGH2 (pp) Q9DC69	false
10263	pp	Q8BGH2 (pp) Q9QYA2	false
10264	pp	Q8BGH2 (pp) O88441	false
10265	pp	Q8BGH2 (pp) P97807	false
10266	pp	Q8BGH2 (pp) Q9CRB9	false
10267	pp	Q8BGH2 (pp) Q9DCJ5	false
10268	pp	Q8BGH2 (pp) Q9WUM5	false
10269	pp	Q8BGH2 (pp) Q91YT0	false
10270	pp	Q99LX0 (pp) Q62277	false
10271	pp	Q99LX0 (pp) O09111	false
10272	pp	Q99LX0 (pp) Q9D6J6	false
10273	pp	Q99LX0 (pp) O55042	false
10274	pp	Q99LX0 (pp) O08756	false
10275	pp	Q99LX0 (pp) Q91VR2	false
10276	pp	Q99LX0 (pp) Q9CQH3	false
10277	pp	P62331 (pp) O70161	false
10278	pp	Q8K1Z0 (pp) Q9DCJ5	false
10279	pp	Q8K1Z0 (pp) Q9WUM5	false
10280	pp	Q8K1Z0 (pp) Q9D6J6	false
10281	pp	Q8K1Z0 (pp) Q9ERS2	false
10282	pp	P11499 (pp) P62259	false
10283	pp	P11499 (pp) Q60864	false
10284	pp	P11499 (pp) P63038	false
10285	pp	P11499 (pp) P63037	false
10286	pp	P11499 (pp) P60710	false
10287	pp	P11499 (pp) Q9CR16	false
10288	pp	P05064 (pp) P17710	false
10289	pp	P05064 (pp) Q9WUA3	false
10290	pp	P05064 (pp) P17182	false
10291	pp	P05064 (pp) Q61735	false
10292	pp	P05064 (pp) P05063	false
10293	pp	P17710 (pp) Q9WUA3	false
10294	pp	P48320 (pp) P61922	false
10295	pp	P48320 (pp) P15105	false
10296	pp	P61922 (pp) Q9DBF1	false
10297	pp	P61922 (pp) P15105	false
10298	pp	P61922 (pp) Q9EQ20	false
10299	pp	P12023 (pp) P46460	false
10300	pp	P12023 (pp) Q9WV18	false
10301	pp	P12023 (pp) P04925	false
10302	pp	P12023 (pp) P63044	false
10303	pp	P12023 (pp) P62823	false
10304	pp	P12023 (pp) Q9CZT8	false
10305	pp	P12023 (pp) P06837	false
10306	pp	P12023 (pp) P63011	false
10307	pp	P12023 (pp) O35526	false
10308	pp	P12023 (pp) O08756	false
10309	pp	P12023 (pp) P68254	false
10310	pp	P12023 (pp) Q8VDN2	false
10311	pp	P12023 (pp) Q9JHU4	false
10312	pp	P12023 (pp) Q62277	false
10313	pp	P12023 (pp) Q9Z1G3	false
10314	pp	P12023 (pp) Q810U3	false
10315	pp	P12023 (pp) P62259	false
10316	pp	P12023 (pp) Q9D6F9	false
10317	pp	P12023 (pp) Q61548	false
10318	pp	P12023 (pp) Q60932	false
10319	pp	P12023 (pp) P35564	false
10320	pp	P12023 (pp) P56564	false
10321	pp	P12023 (pp) Q64332	false
10322	pp	P12023 (pp) O88935	false
10323	pp	P12023 (pp) P07901	false
10324	pp	P12023 (pp) P61982	false
10325	pp	P12023 (pp) O88737	false
10326	pp	P12023 (pp) P13595	false
10327	pp	P12023 (pp) Q9JIS5	false
10328	pp	P12023 (pp) P63101	false
10329	pp	P12023 (pp) P60710	false
10330	pp	P12023 (pp) P68510	false
10331	pp	P12023 (pp) O08599	false
10332	pp	P12023 (pp) P39053	false
10333	pp	P12023 (pp) P12960	false
10334	pp	P12023 (pp) P08551	false
10335	pp	P12023 (pp) P62821	false
10336	pp	P12023 (pp) P46096	false
10337	pp	P12023 (pp) P57780	false
10338	pp	P12023 (pp) Q91ZZ3	false
10339	pp	P12023 (pp) P28652	false
10340	pp	P12023 (pp) O54991	false
10341	pp	P12023 (pp) Q812A2	false
10342	pp	P12023 (pp) P46660	false
10343	pp	P12023 (pp) P60879	false
10344	pp	P12023 (pp) O55042	false
10345	pp	P12023 (pp) P97300	false
10346	pp	P12023 (pp) Q62420	false
10347	pp	P12023 (pp) P01831	false
10348	pp	P12023 (pp) Q68FD5	false
10349	pp	P12023 (pp) Q9Z1G4	false
10350	pp	P12023 (pp) Q9CQV8	false
10351	pp	P12023 (pp) Q61316	false
10352	pp	P12023 (pp) P11627	false
10353	pp	P12023 (pp) P63017	false
10354	pp	P12023 (pp) P61264	false
10355	pp	P62814 (pp) P51863	false
10356	pp	P62814 (pp) P50516	false
10357	pp	P62814 (pp) Q8BVE3	false
10358	pp	P62814 (pp) P57746	false
10359	pp	P62814 (pp) Q9DC69	false
10360	pp	P62814 (pp) Q9Z1G3	false
10361	pp	P62814 (pp) P63082	false
10362	pp	P62814 (pp) Q91VM9	false
10363	pp	P62814 (pp) P50518	false
10364	pp	P62814 (pp) Q9WTT4	false
10365	pp	P62814 (pp) Q9Z1G4	false
10366	pp	Q9WV92 (pp) Q8R5M8	false
10367	pp	Q9WV92 (pp) P12023	false
10368	pp	Q8R5M8 (pp) O70589	false
10369	pp	O35526 (pp) Q62442	false
10370	pp	O35526 (pp) P63040	false
10371	pp	O35526 (pp) P60879	false
10372	pp	O35526 (pp) O08599	false
10373	pp	Q9WV18 (pp) Q80T41	false
10374	pp	P56391 (pp) O09111	false
10375	pp	P56391 (pp) Q9D3D9	false
10376	pp	P56391 (pp) Q9ERS2	false
10377	pp	P56391 (pp) P00405	false
10378	pp	P56391 (pp) P17665	false
10379	pp	P56391 (pp) Q9DCX2	false
10380	pp	Q9D172 (pp) Q9CQH3	false
10381	pp	Q9D172 (pp) P97807	false
10382	pp	Q9D172 (pp) Q91YT0	false
10383	pp	Q9D172 (pp) Q9CQZ5	false
10384	pp	Q9D172 (pp) Q9DCT2	false
10385	pp	Q9D172 (pp) Q9CZ13	false
10386	pp	Q9D172 (pp) Q91WD5	false
10387	pp	Q9D172 (pp) Q8BH95	false
10388	pp	Q9D172 (pp) Q9DCJ5	false
10389	pp	Q9D172 (pp) P42125	false
10390	pp	Q9D172 (pp) Q9DC70	false
10391	pp	Q62442 (pp) P61264	false
10392	pp	P26443 (pp) Q91Z53	false
10393	pp	P26443 (pp) Q61425	false
10394	pp	P26443 (pp) P97807	false
10395	pp	P26443 (pp) P05202	false
10396	pp	P26443 (pp) P15105	false
10397	pp	P26443 (pp) Q9D6R2	false
10398	pp	P26443 (pp) Q8BH04	false
10399	pp	P26443 (pp) Q8CHT0	false
10400	pp	P26443 (pp) P29758	false
10401	pp	P26443 (pp) P05063	false
10402	pp	P26443 (pp) Q05920	false
10403	pp	P26443 (pp) P61922	false
10404	pp	P26443 (pp) P17751	false
10405	pp	P26443 (pp) Q60597	false
10406	pp	P26443 (pp) P70404	false
10407	pp	P26443 (pp) P56480	false
10408	pp	P26443 (pp) P63038	false
10409	pp	P26443 (pp) Q99KI0	false
10410	pp	P26443 (pp) P48320	false
10411	pp	P26443 (pp) P54071	false
10412	pp	P26443 (pp) Q9DCD0	false
10413	pp	Q91Z53 (pp) P45376	false
10414	pp	Q99KJ8 (pp) O08788	false
10415	pp	Q99KJ8 (pp) P28667	false
10416	pp	O08788 (pp) O35465	false
10417	pp	Q99KI0 (pp) Q9D2G2	false
10418	pp	Q99KI0 (pp) Q62351	false
10419	pp	Q99KI0 (pp) Q91VR2	false
10420	pp	Q99KI0 (pp) Q9CQH3	false
10421	pp	Q99KI0 (pp) P17751	false
10422	pp	Q99KI0 (pp) Q9DC69	false
10423	pp	Q99KI0 (pp) Q9DB77	false
10424	pp	Q99KI0 (pp) Q9CZ13	false
10425	pp	Q99KI0 (pp) P63038	false
10426	pp	Q99KI0 (pp) P54071	false
10427	pp	Q99KI0 (pp) P47857	false
10428	pp	Q99KI0 (pp) P52480	false
10429	pp	Q99KI0 (pp) Q05920	false
10430	pp	Q99KI0 (pp) Q9D3D9	false
10431	pp	Q99KI0 (pp) P70404	false
10432	pp	Q99KI0 (pp) O09111	false
10433	pp	Q99KI0 (pp) Q9D6R2	false
10434	pp	Q99KI0 (pp) Q9ERS2	false
10435	pp	Q99KI0 (pp) Q91YT0	false
10436	pp	Q99KI0 (pp) Q9CR68	false
10437	pp	Q99KI0 (pp) P06745	false
10438	pp	Q99KI0 (pp) Q9DB20	false
10439	pp	Q99KI0 (pp) Q9DCJ5	false
10440	pp	Q99KI0 (pp) Q9D0M3	false
10441	pp	Q99KI0 (pp) Q9CPP6	false
10442	pp	Q99KI0 (pp) Q8K1M6	false
10443	pp	Q99KI0 (pp) P68510	false
10444	pp	Q99KI0 (pp) Q9WUM5	false
10445	pp	Q99KI0 (pp) Q60597	false
10446	pp	Q99KI0 (pp) Q99LX0	false
10447	pp	Q99KI0 (pp) P35486	false
10448	pp	Q99KI0 (pp) Q9Z1J3	false
10449	pp	Q99KI0 (pp) Q03265	false
10450	pp	Q99KI0 (pp) Q01097	false
10451	pp	Q99KI0 (pp) P97807	false
10452	pp	Q99KI0 (pp) P56480	false
10453	pp	Q99KI0 (pp) P05064	false
10454	pp	Q99KI0 (pp) Q9D6J6	false
10455	pp	Q9ERS2 (pp) P50516	false
10456	pp	Q9ERS2 (pp) Q91VR2	false
10457	pp	Q9ERS2 (pp) O09111	false
10458	pp	Q9ERS2 (pp) Q9D6J6	false
10459	pp	Q9ERS2 (pp) Q9CQH3	false
10460	pp	P97807 (pp) Q06185	false
10461	pp	P97807 (pp) P54071	false
10462	pp	P97807 (pp) Q99LX0	false
10463	pp	P97807 (pp) Q9D2G2	false
10464	pp	P97807 (pp) Q9D6R2	false
10465	pp	P97807 (pp) Q9CQQ7	false
10466	pp	P97807 (pp) P48771	false
10467	pp	P97807 (pp) O08756	false
10468	pp	P97807 (pp) Q9DCD0	false
10469	pp	P97807 (pp) Q9DCJ5	false
10470	pp	P97807 (pp) Q9DCS9	false
10471	pp	P97807 (pp) Q99LC5	false
10472	pp	P97807 (pp) Q9DC69	false
10473	pp	P97807 (pp) Q60597	false
10474	pp	P97807 (pp) Q05920	false
10475	pp	P97807 (pp) Q91VR2	false
10476	pp	P97807 (pp) Q91YT0	false
10477	pp	P97807 (pp) Q8K3J1	false
10478	pp	P97807 (pp) P06151	false
10479	pp	P97807 (pp) Q9WUM5	false
10480	pp	P97807 (pp) Q9D6J6	false
10481	pp	P97807 (pp) P06745	false
10482	pp	P97807 (pp) Q8BMF4	false
10483	pp	P97807 (pp) Q61425	false
10484	pp	P97807 (pp) Q9CR68	false
10485	pp	P97807 (pp) Q921G7	false
10486	pp	P97807 (pp) Q9CQH3	false
10487	pp	P97807 (pp) Q60931	false
10488	pp	P97807 (pp) P05202	false
10489	pp	Q6PHZ2 (pp) P60710	false
10490	pp	Q6PHZ2 (pp) P99024	false
10491	pp	Q6PHZ2 (pp) P35436	false
10492	pp	Q6PHZ2 (pp) P63101	false
10493	pp	Q6PHZ2 (pp) P68369	false
10494	pp	P60710 (pp) Q9R0Q6	false
10495	pp	P60710 (pp) P59999	false
10496	pp	P60710 (pp) Q9D898	false
10497	pp	P60710 (pp) P35438	false
10498	pp	P60710 (pp) P16054	false
10499	pp	P60710 (pp) Q9CPW4	false
10500	pp	P60710 (pp) Q9JM76	false
10501	pp	P60710 (pp) O70589	false
10502	pp	Q02248 (pp) P05480	false
10503	pp	Q02248 (pp) Q61301	false
10504	pp	Q02248 (pp) P35438	false
10505	pp	Q02248 (pp) P39688	false
10506	pp	Q02248 (pp) P68510	false
10507	pp	Q02248 (pp) Q68FH0	false
10508	pp	Q02248 (pp) O88712	false
10509	pp	Q02248 (pp) Q01097	false
10510	pp	Q02248 (pp) P63001	false
10511	pp	P05480 (pp) P35436	false
10512	pp	P05480 (pp) P35438	false
10513	pp	P05480 (pp) P39053	false
10514	pp	P05480 (pp) P30999	false
10515	pp	P05480 (pp) P23242	false
10516	pp	P51881 (pp) P62259	false
10517	pp	P51881 (pp) P16054	false
10518	pp	Q91WD5 (pp) Q8K2B3	false
10519	pp	Q91WD5 (pp) Q9CQZ6	false
10520	pp	Q91WD5 (pp) Q99MN9	false
10521	pp	Q91WD5 (pp) Q9DCJ5	false
10522	pp	Q91WD5 (pp) P08249	false
10523	pp	Q91WD5 (pp) P70404	false
10524	pp	Q91WD5 (pp) Q8VEM8	false
10525	pp	Q91WD5 (pp) Q9D0M3	false
10526	pp	Q91WD5 (pp) Q99KI0	false
10527	pp	Q91WD5 (pp) Q99JY0	false
10528	pp	Q91WD5 (pp) Q91VR2	false
10529	pp	Q91WD5 (pp) Q9CQ69	false
10530	pp	Q91WD5 (pp) Q9D855	false
10531	pp	Q91WD5 (pp) Q9CQH3	false
10532	pp	Q91WD5 (pp) Q9DC70	false
10533	pp	Q91WD5 (pp) P97807	false
10534	pp	Q91WD5 (pp) Q9CQQ7	false
10535	pp	Q91WD5 (pp) Q99LX0	false
10536	pp	Q91WD5 (pp) Q99LC3	false
10537	pp	Q91WD5 (pp) Q9CQZ5	false
10538	pp	Q91WD5 (pp) P97450	false
10539	pp	Q91WD5 (pp) Q9CQC7	false
10540	pp	Q91WD5 (pp) Q9CQJ8	false
10541	pp	Q91WD5 (pp) Q9DB77	false
10542	pp	Q91WD5 (pp) Q9CXZ1	false
10543	pp	Q91WD5 (pp) Q9D6J6	false
10544	pp	Q91WD5 (pp) Q9DCS9	false
10545	pp	Q91WD5 (pp) Q9CR68	false
10546	pp	Q91WD5 (pp) Q3ULD5	false
10547	pp	Q91WD5 (pp) P20108	false
10548	pp	Q91WD5 (pp) Q8BGH2	false
10549	pp	Q91WD5 (pp) Q03265	false
10550	pp	Q91WD5 (pp) Q7TMF3	false
10551	pp	Q91WD5 (pp) Q8CAQ8	false
10552	pp	Q91WD5 (pp) Q6PB66	false
10553	pp	Q91WD5 (pp) P56480	false
10554	pp	Q91WD5 (pp) Q8K3J1	false
10555	pp	Q91WD5 (pp) Q9D6J5	false
10556	pp	Q91WD5 (pp) Q9CQ75	false
10557	pp	Q91WD5 (pp) Q9ERS2	false
10558	pp	Q91WD5 (pp) Q8K1Z0	false
10559	pp	Q91WD5 (pp) P52503	false
10560	pp	Q91WD5 (pp) P17751	false
10561	pp	Q91WD5 (pp) Q8BH95	false
10562	pp	Q91WD5 (pp) Q99LC5	false
10563	pp	Q91WD5 (pp) Q9CZ13	false
10564	pp	Q91WD5 (pp) Q9DB20	false
10565	pp	Q91WD5 (pp) P09411	false
10566	pp	Q91WD5 (pp) Q91VD9	false
10567	pp	Q91WD5 (pp) P35486	false
10568	pp	Q91WD5 (pp) Q9WUM5	false
10569	pp	Q91WD5 (pp) Q9DC69	false
10570	pp	Q91WD5 (pp) Q91YT0	false
10571	pp	Q91WD5 (pp) Q99LY9	false
10572	pp	Q91WD5 (pp) Q9CPP6	false
10573	pp	Q8K2B3 (pp) P97807	false
10574	pp	Q8K2B3 (pp) Q8JZQ2	false
10575	pp	Q8K2B3 (pp) Q8VEM8	false
10576	pp	Q8K2B3 (pp) Q9D0M3	false
10577	pp	Q8K2B3 (pp) Q91VR2	false
10578	pp	Q8K2B3 (pp) Q9D2G2	false
10579	pp	Q8K2B3 (pp) Q9Z0X1	false
10580	pp	Q8K2B3 (pp) Q9D051	false
10581	pp	Q8K2B3 (pp) Q03265	false
10582	pp	Q8K2B3 (pp) P52196	false
10583	pp	Q8K2B3 (pp) Q9CPP6	false
10584	pp	Q8K2B3 (pp) Q9CQQ7	false
10585	pp	Q8K2B3 (pp) Q99KI0	false
10586	pp	Q8K2B3 (pp) P09411	false
10587	pp	Q8K2B3 (pp) Q91YT0	false
10588	pp	Q8K2B3 (pp) Q9Z2I9	false
10589	pp	Q8K2B3 (pp) P00493	false
10590	pp	Q8K2B3 (pp) Q60597	false
10591	pp	Q8K2B3 (pp) P56480	false
10592	pp	Q8K2B3 (pp) Q9WUM5	false
10593	pp	Q8K2B3 (pp) Q99LC5	false
10594	pp	Q8K2B3 (pp) Q9CR68	false
10595	pp	Q8K2B3 (pp) Q9CZ13	false
10596	pp	Q8K2B3 (pp) Q9DC69	false
10597	pp	Q8K2B3 (pp) Q9D6J6	false
10598	pp	Q8K2B3 (pp) Q9DB77	false
10599	pp	Q8K2B3 (pp) P35486	false
10600	pp	Q8K2B3 (pp) Q8K3J1	false
10601	pp	Q8K2B3 (pp) P63038	false
10602	pp	Q8K2B3 (pp) Q9D6R2	false
10603	pp	Q8K2B3 (pp) Q91VD9	false
10604	pp	Q8K2B3 (pp) P17751	false
10605	pp	Q8K2B3 (pp) P58281	false
10606	pp	Q8K2B3 (pp) Q99JY0	false
10607	pp	P68369 (pp) P39053	false
10608	pp	P68369 (pp) P27546	false
10609	pp	P68369 (pp) P63101	false
10610	pp	P68369 (pp) P35438	false
10611	pp	P68369 (pp) P60879	false
10612	pp	Q8VEM8 (pp) Q9D6J6	false
10613	pp	Q8VEM8 (pp) Q9CQH3	false
10614	pp	Q8VEM8 (pp) Q9CQQ7	false
10615	pp	Q8VEM8 (pp) Q9D3D9	false
10616	pp	Q3ULD5 (pp) Q8R4N0	false
10617	pp	Q3ULD5 (pp) Q99MN9	false
10618	pp	Q3ULD5 (pp) Q9JHI5	false
10619	pp	Q3ULD5 (pp) Q921G7	false
10620	pp	Q3ULD5 (pp) Q8BMS1	false
10621	pp	Q3ULD5 (pp) Q8BH95	false
10622	pp	Q3ULD5 (pp) Q91ZA3	false
10623	pp	Q3ULD5 (pp) Q99MR8	false
10624	pp	Q3ULD5 (pp) Q9D0K2	false
10625	pp	Q3ULD5 (pp) Q05920	false
10626	pp	Q8R4N0 (pp) Q91ZA3	false
10627	pp	Q8R4N0 (pp) Q99MR8	false
10628	pp	Q8R4N0 (pp) P05480	false
10629	pp	Q8R4N0 (pp) Q9WUM5	false
10630	pp	Q8R4N0 (pp) Q99LC5	false
10631	pp	P52503 (pp) Q9D6J6	false
10632	pp	P52503 (pp) P48771	false
10633	pp	P52503 (pp) Q9CQZ6	false
10634	pp	P52503 (pp) Q91YT0	false
10635	pp	P52503 (pp) Q9CZ13	false
10636	pp	P52503 (pp) Q91VD9	false
10637	pp	P52503 (pp) Q9CQZ5	false
10638	pp	P52503 (pp) P42125	false
10639	pp	P52503 (pp) P43024	false
10640	pp	P52503 (pp) P62073	false
10641	pp	P52503 (pp) Q9DC69	false
10642	pp	P52503 (pp) Q8K3J1	false
10643	pp	P52503 (pp) Q9CQQ7	false
10644	pp	P52503 (pp) Q9CQJ8	false
10645	pp	P52503 (pp) Q9CQH3	false
10646	pp	P52503 (pp) Q9CR68	false
10647	pp	P52503 (pp) P56391	false
10648	pp	P52503 (pp) Q9DB20	false
10649	pp	P52503 (pp) Q99LC3	false
10650	pp	P52503 (pp) P97450	false
10651	pp	P52503 (pp) Q99LX0	false
10652	pp	P52503 (pp) Q9DCJ5	false
10653	pp	P52503 (pp) Q9CXZ1	false
10654	pp	P52503 (pp) Q9D0M3	false
10655	pp	P52503 (pp) Q9CQC7	false
10656	pp	P52503 (pp) Q9D6J5	false
10657	pp	P52503 (pp) P99029	false
10658	pp	P52503 (pp) Q9ERS2	false
10659	pp	P52503 (pp) Q06185	false
10660	pp	P52503 (pp) Q9CQ54	false
10661	pp	P52503 (pp) P17665	false
10662	pp	P52503 (pp) Q9CPP6	false
10663	pp	P52503 (pp) Q99LY9	false
10664	pp	P52503 (pp) Q9DCS9	false
10665	pp	P52503 (pp) Q9D3D9	false
10666	pp	P52503 (pp) O08756	false
10667	pp	P52503 (pp) O09111	false
10668	pp	P52503 (pp) Q9CQ69	false
10669	pp	P52503 (pp) Q9Z1P6	false
10670	pp	Q60631 (pp) Q62277	false
10671	pp	Q60631 (pp) Q62420	false
10672	pp	Q60631 (pp) P18052	false
10673	pp	Q60631 (pp) P04925	false
10674	pp	Q60631 (pp) P20444	false
10675	pp	Q60631 (pp) P12023	false
10676	pp	Q60631 (pp) O08585	false
10677	pp	Q60631 (pp) P05480	false
10678	pp	Q60631 (pp) Q8CHC4	false
10679	pp	Q60631 (pp) P39053	false
10680	pp	Q60631 (pp) Q68FD5	false
10681	pp	Q62277 (pp) P60879	false
10682	pp	Q62277 (pp) P62204	false
10683	pp	Q62277 (pp) P46096	false
10684	pp	Q62277 (pp) P63044	false
10685	pp	Q62277 (pp) P01831	false
10686	pp	Q62277 (pp) P43006	false
10687	pp	P62073 (pp) P99029	false
10688	pp	P62073 (pp) O08756	false
10689	pp	P62073 (pp) Q9ERS2	false
10690	pp	P62073 (pp) Q925I1	false
10691	pp	P62073 (pp) Q9DCJ5	false
10692	pp	P62073 (pp) P56391	false
10693	pp	P62073 (pp) O35658	false
10694	pp	P62073 (pp) Q9CR68	false
10695	pp	P62073 (pp) Q9D3D9	false
10696	pp	P62073 (pp) Q9DCS9	false
10697	pp	P62073 (pp) P67778	false
10698	pp	P62073 (pp) Q9D6J6	false
10699	pp	P62073 (pp) Q9CQH3	false
10700	pp	P99029 (pp) Q9D6J6	false
10701	pp	Q9CQV8 (pp) P62259	false
10702	pp	Q9CQV8 (pp) P63101	false
10703	pp	Q9CQV8 (pp) P16054	false
10704	pp	Q9CQV8 (pp) Q64010	false
10705	pp	Q9CQV8 (pp) P10637	false
10706	pp	Q9CQR4 (pp) Q9CQH3	false
10707	pp	Q9CQR4 (pp) P97450	false
10708	pp	Q9CQR4 (pp) Q9D6J6	false
10709	pp	Q9CQR4 (pp) Q9DCD0	false
10710	pp	Q9CQR4 (pp) Q9CQZ6	false
10711	pp	Q9CQR4 (pp) Q9CQZ5	false
10712	pp	Q9CQR4 (pp) Q9DCJ5	false
10713	pp	Q9CQR4 (pp) Q99LC5	false
10714	pp	Q9CQR4 (pp) Q61425	false
10715	pp	P40142 (pp) P09411	false
10716	pp	P40142 (pp) Q9DCD0	false
10717	pp	P40142 (pp) P06745	false
10718	pp	P40142 (pp) Q93092	false
10719	pp	P40142 (pp) P16858	false
10720	pp	P40142 (pp) Q60597	false
10721	pp	P40142 (pp) P52480	false
10722	pp	P40142 (pp) P17751	false
10723	pp	P40142 (pp) P05064	false
10724	pp	P40142 (pp) P06151	false
10725	pp	P40142 (pp) P17182	false
10726	pp	P40142 (pp) P35486	false
10727	pp	P40142 (pp) Q9D0F9	false
10728	pp	P40142 (pp) P05063	false
10729	pp	P63213 (pp) P62874	false
10730	pp	P63213 (pp) P18872	false
10731	pp	P62874 (pp) P04925	false
10732	pp	Q99KR7 (pp) O35658	false
10733	pp	Q99KR7 (pp) P56480	false
10734	pp	O35658 (pp) P40630	false
10735	pp	O35658 (pp) Q9CQQ7	false
10736	pp	Q7TMF3 (pp) Q9DCX2	false
10737	pp	Q7TMF3 (pp) Q9CXZ1	false
10738	pp	Q7TMF3 (pp) O09111	false
10739	pp	Q7TMF3 (pp) Q9CR68	false
10740	pp	Q7TMF3 (pp) Q9CQ54	false
10741	pp	Q7TMF3 (pp) Q9DC69	false
10742	pp	Q7TMF3 (pp) Q62425	false
10743	pp	Q7TMF3 (pp) Q9D0M3	false
10744	pp	Q7TMF3 (pp) P97450	false
10745	pp	Q7TMF3 (pp) P52503	false
10746	pp	Q7TMF3 (pp) Q9D855	false
10747	pp	Q7TMF3 (pp) Q9DC70	false
10748	pp	Q7TMF3 (pp) Q9DCS9	false
10749	pp	Q7TMF3 (pp) Q9CQZ5	false
10750	pp	Q7TMF3 (pp) Q9CQQ7	false
10751	pp	Q7TMF3 (pp) Q9Z1P6	false
10752	pp	Q7TMF3 (pp) Q9DCJ5	false
10753	pp	Q7TMF3 (pp) Q9CQZ6	false
10754	pp	Q7TMF3 (pp) Q3UIU2	false
10755	pp	Q7TMF3 (pp) Q9ERS2	false
10756	pp	Q7TMF3 (pp) Q9CQJ8	false
10757	pp	Q7TMF3 (pp) Q9D6J5	false
10758	pp	Q7TMF3 (pp) Q99LY9	false
10759	pp	Q7TMF3 (pp) Q8K3J1	false
10760	pp	Q7TMF3 (pp) Q9CQC7	false
10761	pp	Q7TMF3 (pp) Q9CQH3	false
10762	pp	Q7TMF3 (pp) Q9D3D9	false
10763	pp	Q7TMF3 (pp) Q9D6J6	false
10764	pp	Q7TMF3 (pp) Q9CQ69	false
10765	pp	Q7TMF3 (pp) Q91YT0	false
10766	pp	Q7TMF3 (pp) Q91VD9	false
10767	pp	Q7TMF3 (pp) Q99LC3	false
10768	pp	Q9DCX2 (pp) Q9ERS2	false
10769	pp	Q9DCX2 (pp) Q99LX0	false
10770	pp	Q9DCX2 (pp) Q91VR2	false
10771	pp	Q9DCX2 (pp) Q9CQQ7	false
10772	pp	Q9DCX2 (pp) Q9D6J6	false
10773	pp	Q9DCX2 (pp) Q9CQH3	false
10774	pp	Q9DCX2 (pp) Q9D3D9	false
10775	pp	Q9DCX2 (pp) Q99LY9	false
10776	pp	Q61735 (pp) P97797	false
10777	pp	P50518 (pp) Q8BVE3	false
10778	pp	P50518 (pp) Q9Z1G4	false
10779	pp	P50518 (pp) P63082	false
10780	pp	P50518 (pp) P57746	false
10781	pp	P50518 (pp) Q9WTT4	false
10782	pp	P50518 (pp) Q9Z1G3	false
10783	pp	P50518 (pp) P50516	false
[truncated: 1,394 more rows]
