# Supplementary material for: APP Is a Context-Sensitive Regulator of the Hippocampal Presynaptic Active Zone
Source: PLOS journal article supplement (doi:10.1371/journal.pcbi.1004832), 2016-04-19
Supplement: S6 (10.1371/journal.pcbi.1004832.s006) [file journal.pcbi.1004832.s006.cys › CytoscapeSession-2016_01_22-10_07/tables/8163-Communities/LOCAL_ATTRS-org.cytoscape.model.CyNode-Communities+default+node.cytable]

"CyCSV-Version","1"
"SUID","1_Localization","APP-KO/wt","Community","Gene names","Gene names  (primary )","name","NexCre/wt","Organism","Organism ID","Protein names","selected","Status","Subcommunities"
"java.lang.Long","java.lang.String","java.lang.Double","java.lang.Integer","java.lang.String","java.lang.String","java.lang.String","java.lang.Double","java.lang.String","java.lang.Integer","java.lang.String","java.lang.Boolean","java.lang.String","java.lang.String"
"","mutable","mutable","mutable","mutable","mutable","","mutable","mutable","mutable","mutable","","mutable","mutable"
"Communities default node",""
"8173","Plasma Membrane","0.877","1","Grin2b","Grin2b","Q01097","1.114","Mus musculus (Mouse)","10090","Glutamate receptor ionotropic, NMDA 2B (GluN2B) (Glutamate [NMDA] receptor subunit epsilon-2) (N-methyl D-aspartate receptor subtype 2B) (NMDAR2B) (NR2B)","false","reviewed","1_1"
"8174","Cytoplasm","0.957","1","Shank2 Cortbp1 Kiaa1022","Shank2","Q80Z38","1.047","Mus musculus (Mouse)","10090","SH3 and multiple ankyrin repeat domains protein 2 (Shank2) (Cortactin-binding protein 1) (CortBP1)","false","reviewed","1_1"
"8175","Mitochondrion","1.017","3","Ndufa6","Ndufa6","Q9CQZ5","1.199","Mus musculus (Mouse)","10090","NADH dehydrogenase [ubiquinone] 1 alpha subcomplex subunit 6 (Complex I-B14) (CI-B14) (NADH-ubiquinone oxidoreductase B14 subunit)","false","reviewed","3_1"
"8176","Mitochondrion","1.04","3","Ndufv2","Ndufv2","Q9D6J6","1.075","Mus musculus (Mouse)","10090","NADH dehydrogenase [ubiquinone] flavoprotein 2, mitochondrial (EC 1.6.5.3) (EC 1.6.99.3) (NADH-ubiquinone oxidoreductase 24 kDa subunit)","false","reviewed","3_1"
"8177","Mitochondrion","1.062","4","Dld","Dld","O08749","1.193","Mus musculus (Mouse)","10090","Dihydrolipoyl dehydrogenase, mitochondrial (EC 1.8.1.4) (Dihydrolipoamide dehydrogenase)","false","reviewed","4_1"
"8178","Mitochondrion","1.087","4","Pdhb","Pdhb","Q9D051","1.207","Mus musculus (Mouse)","10090","Pyruvate dehydrogenase E1 component subunit beta, mitochondrial (PDHE1-B) (EC 1.2.4.1)","false","reviewed","4_1"
"8179","Mitochondrion","0.884","3","Atp5d","Atp5d","Q9D3D9","1.011","Mus musculus (Mouse)","10090","ATP synthase subunit delta, mitochondrial (F-ATPase delta subunit)","false","reviewed","3_2"
"8180","Mitochondrion","1.034","3","Ndufb11 Np15","Ndufb11","O09111","1.092","Mus musculus (Mouse)","10090","NADH dehydrogenase [ubiquinone] 1 beta subcomplex subunit 11, mitochondrial (Complex I-ESSS) (CI-ESSS) (NADH-ubiquinone oxidoreductase ESSS subunit) (Neuronal protein 15.6) (Np15.6) (p15.6)","false","reviewed","3_1"
"8181","Mitochondrion","1.114","3","Atp5a1","Atp5a1","Q03265","1.245","Mus musculus (Mouse)","10090","ATP synthase subunit alpha, mitochondrial","false","reviewed","3_2"
"8182","Signaling Cascade","0.807","1","Ywhah","Ywhah","P68510","0.87","Mus musculus (Mouse)","10090","14-3-3 protein eta","false","reviewed","1_10"
"8183","Cytoplasm","1.044","4","Pfkl Pfk-l Pfkb","Pfkl","P12382","0.986","Mus musculus (Mouse)","10090","ATP-dependent 6-phosphofructokinase, liver type (ATP-PFK) (PFK-L) (EC 2.7.1.11) (6-phosphofructokinase type B) (Phosphofructo-1-kinase isozyme B) (PFK-B) (Phosphohexokinase)","false","reviewed","4_2"
"8184","Plasma Membrane","0.904","1","Grin1 Glurz1","Grin1","P35438","1.099","Mus musculus (Mouse)","10090","Glutamate receptor ionotropic, NMDA 1 (GluN1) (Glutamate [NMDA] receptor subunit zeta-1) (N-methyl-D-aspartate receptor subunit NR1) (NMD-R1)","false","reviewed","1_1"
"8185","Mitochondrion","1.171","4","Got2 Got-2","Got2","P05202","1.203","Mus musculus (Mouse)","10090","Aspartate aminotransferase, mitochondrial (mAspAT) (EC 2.6.1.1) (EC 2.6.1.7) (Fatty acid-binding protein) (FABP-1) (Glutamate oxaloacetate transaminase 2) (Kynurenine aminotransferase 4) (Kynurenine aminotransferase IV) (Kynurenine--oxoglutarate transaminase 4) (Kynurenine--oxoglutarate transaminase IV) (Plasma membrane-associated fatty acid-binding protein) (FABPpm) (Transaminase A)","false","reviewed","4_1"
"8186","Signaling Cascade","1.046","1","Rhoa Arha Arha2","Rhoa","Q9QUI0","0.967","Mus musculus (Mouse)","10090","Transforming protein RhoA","false","reviewed","1_6"
"8187","Plasma Membrane","1.0","1","Aplp2","Aplp2","Q06335","1.0","Mus musculus (Mouse)","10090","Amyloid-like protein 2 (APLP-2) (CDEI box-binding protein) (CDEBP)","false","reviewed","1_2"
"8188","Plasma Membrane","0.911","1","Gria2 Glur2","Gria2","P23819","1.129","Mus musculus (Mouse)","10090","Glutamate receptor 2 (GluR-2) (AMPA-selective glutamate receptor 2) (GluR-B) (GluR-K2) (Glutamate receptor ionotropic, AMPA 2) (GluA2)","false","reviewed","1_3"
"8189","Plasma Membrane","0.927","1","Grin2a","Grin2a","P35436","1.088","Mus musculus (Mouse)","10090","Glutamate receptor ionotropic, NMDA 2A (GluN2A) (Glutamate [NMDA] receptor subunit epsilon-1) (N-methyl D-aspartate receptor subtype 2A) (NMDAR2A) (NR2A)","false","reviewed","1_1"
"8190","Mitochondrion","1.131","4","Cs","Cs","Q9CZU6","1.175","Mus musculus (Mouse)","10090","Citrate synthase, mitochondrial (EC 2.3.3.1) (Citrate (Si)-synthase)","false","reviewed","4_1"
"8191","Cytoplasm","0.991","4","Pgd","Pgd","Q9DCD0","0.972","Mus musculus (Mouse)","10090","6-phosphogluconate dehydrogenase, decarboxylating (EC 1.1.1.44)","false","reviewed","4_2"
"8192","Synaptic Vesicle","0.629","2","Atp6v0d1 Atp6d","Atp6v0d1","P51863","0.813","Mus musculus (Mouse)","10090","V-type proton ATPase subunit d 1 (V-ATPase subunit d 1) (P39) (Physophilin) (V-ATPase 40 kDa accessory protein) (V-ATPase AC39 subunit) (Vacuolar proton pump subunit d 1)","false","reviewed","2_4"
"8193","Synaptic Vesicle","1.033","2","Atp6v1c1 Atp6c Atp6c1 Vatc","Atp6v1c1","Q9Z1G3","0.896","Mus musculus (Mouse)","10090","V-type proton ATPase subunit C 1 (V-ATPase subunit C 1) (Vacuolar proton pump subunit C 1)","false","reviewed","2_4"
"8194","Signaling Cascade","0.772","1","Ywhae","Ywhae","P62259","0.865","Mus musculus (Mouse)","10090","14-3-3 protein epsilon (14-3-3E)","false","reviewed","1_4"
"8195","Cytoskeleton","1.086","1","Capzb Cappb1","Capzb","P47757","0.991","Mus musculus (Mouse)","10090","F-actin-capping protein subunit beta (CapZ beta)","false","reviewed","1_5"
"8196","Plasma Membrane","1.008","1","Ank2","Ank2","Q8C8R3","0.986","Mus musculus (Mouse)","10090","Ankyrin-2 (ANK-2) (Brain ankyrin)","false","reviewed","1_2"
"8197","Cytoskeleton","1.081","1","Sptan1 Spna2 Spta2","Sptan1","P16546","0.996","Mus musculus (Mouse)","10090","Spectrin alpha chain, non-erythrocytic 1 (Alpha-II spectrin) (Fodrin alpha chain)","false","reviewed","1_2"
"8198","Signaling Cascade","1.016","1","Ppp2ca","Ppp2ca","P63330","0.959","Mus musculus (Mouse)","10090","Serine/threonine-protein phosphatase 2A catalytic subunit alpha isoform (PP2A-alpha) (EC 3.1.3.16)","false","reviewed","1_7"
"8199","Signaling Cascade","0.998","1","Ppp2r1a","Ppp2r1a","Q76MZ3","0.93","Mus musculus (Mouse)","10090","Serine/threonine-protein phosphatase 2A 65 kDa regulatory subunit A alpha isoform (PP2A subunit A isoform PR65-alpha) (PP2A subunit A isoform R1-alpha)","false","reviewed","1_7"
"8200","Mitochondrion","1.016","3","Ndufb3","Ndufb3","Q9CQZ6","1.196","Mus musculus (Mouse)","10090","NADH dehydrogenase [ubiquinone] 1 beta subcomplex subunit 3 (Complex I-B12) (CI-B12) (NADH-ubiquinone oxidoreductase B12 subunit)","false","reviewed","3_1"
"8201","Mitochondrion","0.942","3","Ndufc2","Ndufc2","Q9CQ54","1.076","Mus musculus (Mouse)","10090","NADH dehydrogenase [ubiquinone] 1 subunit C2 (Complex I-B14.5b) (CI-B14.5b) (NADH-ubiquinone oxidoreductase subunit B14.5b)","false","reviewed","3_1"
"8202","Mitochondrion","1.042","3","Ndufs3","Ndufs3","Q9DCT2","1.142","Mus musculus (Mouse)","10090","NADH dehydrogenase [ubiquinone] iron-sulfur protein 3, mitochondrial (EC 1.6.5.3) (EC 1.6.99.3) (Complex I-30kD) (CI-30kD) (NADH-ubiquinone oxidoreductase 30 kDa subunit)","false","reviewed","3_3"
"8203","Mitochondrion","0.888","3","Uqcrq","Uqcrq","Q9CQ69","1.05","Mus musculus (Mouse)","10090","Cytochrome b-c1 complex subunit 8 (Complex III subunit 8) (Complex III subunit VIII) (Ubiquinol-cytochrome c reductase complex 9.5 kDa protein) (Ubiquinol-cytochrome c reductase complex ubiquinone-binding protein QP-C)","false","reviewed","3_1"
"8204","Mitochondrion","1.148","4","Mdh2 Mor1","Mdh2","P08249","1.195","Mus musculus (Mouse)","10090","Malate dehydrogenase, mitochondrial (EC 1.1.1.37)","false","reviewed","4_1"
"8205","Mitochondrion","1.086","4","Idh3a","Idh3a","Q9D6R2","1.187","Mus musculus (Mouse)","10090","Isocitrate dehydrogenase [NAD] subunit alpha, mitochondrial (EC 1.1.1.41) (Isocitric dehydrogenase subunit alpha) (NAD(+)-specific ICDH subunit alpha)","false","reviewed","4_1"
"8206","Mitochondrion","1.186","4","Idh2","Idh2","P54071","1.351","Mus musculus (Mouse)","10090","Isocitrate dehydrogenase [NADP], mitochondrial (IDH) (EC 1.1.1.42) (ICD-M) (IDP) (NADP(+)-specific ICDH) (Oxalosuccinate decarboxylase)","false","reviewed","4_1"
"8207","Cytoplasm","1.083","4","Ldha Ldh-1 Ldh1","Ldha","P06151","0.876","Mus musculus (Mouse)","10090","L-lactate dehydrogenase A chain (LDH-A) (EC 1.1.1.27) (LDH muscle subunit) (LDH-M)","false","reviewed","4_3"
"8208","Mitochondrion","1.057","3","Atp5o D12Wsu28e","Atp5o","Q9DB20","1.162","Mus musculus (Mouse)","10090","ATP synthase subunit O, mitochondrial (Oligomycin sensitivity conferral protein) (OSCP)","false","reviewed","3_3"
"8209","Mitochondrion","0.793","3","Ndufb5","Ndufb5","Q9CQH3","1.102","Mus musculus (Mouse)","10090","NADH dehydrogenase [ubiquinone] 1 beta subcomplex subunit 5, mitochondrial (Complex I-SGDH) (CI-SGDH) (NADH-ubiquinone oxidoreductase SGDH subunit)","false","reviewed","3_1"
"8210","Signaling Cascade","0.993","1","Agap2 Centg1 Kiaa0167","Agap2","Q3UHD9","1.067","Mus musculus (Mouse)","10090","Arf-GAP with GTPase, ANK repeat and PH domain-containing protein 2 (AGAP-2) (Centaurin-gamma-1) (Cnt-g1) (Phosphatidylinositol 3-kinase enhancer) (PIKE)","false","reviewed","1_9"
"8211","Cytoskeleton","1.046","1","Epb41l1 Epb4 Epb4.1l1 Kiaa0338","Epb41l1","Q9Z2H5","0.98","Mus musculus (Mouse)","10090","Band 4.1-like protein 1 (Neuronal protein 4.1) (4.1N)","false","reviewed","1_9"
"8212","Cytoplasm","1.073","1","Caskin1 Kiaa1306","Caskin1","Q6P9K8","1.139","Mus musculus (Mouse)","10090","Caskin-1 (CASK-interacting protein 1)","false","reviewed","1_9"
"8213","Plasma Membrane","1.038","1","Lin7c Mals3 Veli3","Lin7c","O88952","0.97","Mus musculus (Mouse)","10090","Protein lin-7 homolog C (Lin-7C) (mLin7C) (Mammalian lin-seven protein 3) (MALS-3) (Vertebrate lin-7 homolog 3) (Veli-3)","false","reviewed","1_9"
"8214","Mitochondrion","0.984","3","Cox4i1 Cox4 Cox4a","Cox4i1","P19783","1.078","Mus musculus (Mouse)","10090","Cytochrome c oxidase subunit 4 isoform 1, mitochondrial (Cytochrome c oxidase polypeptide IV) (Cytochrome c oxidase subunit IV isoform 1) (COX IV-1)","false","reviewed","3_2"
"8215","Cytoplasm","0.989","6","Ahsa1","Ahsa1","Q8BK64","1.012","Mus musculus (Mouse)","10090","Activator of 90 kDa heat shock protein ATPase homolog 1 (AHA1)","false","reviewed","6_2"
"8216","Mitochondrion","1.117","6","Hspd1 Hsp60","Hspd1","P63038","1.18","Mus musculus (Mouse)","10090","60 kDa heat shock protein, mitochondrial (60 kDa chaperonin) (Chaperonin 60) (CPN60) (HSP-65) (Heat shock protein 60) (HSP-60) (Hsp60) (Mitochondrial matrix protein P1)","false","reviewed","6_1"
"8217","Mitochondrion","1.08","5","Echs1","Echs1","Q8BH95","1.136","Mus musculus (Mouse)","10090","Enoyl-CoA hydratase, mitochondrial (EC 4.2.1.17) (Enoyl-CoA hydratase 1) (Short-chain enoyl-CoA hydratase) (SCEH)","false","reviewed","5_3"
"8218","Mitochondrion","1.09","3","Uqcrc1","Uqcrc1","Q9CZ13","1.232","Mus musculus (Mouse)","10090","Cytochrome b-c1 complex subunit 1, mitochondrial (Complex III subunit 1) (Core protein I) (Ubiquinol-cytochrome-c reductase complex core protein 1)","false","reviewed","3_3"
"8219","Mitochondrion","1.034","3","Cyc1","Cyc1","Q9D0M3","1.097","Mus musculus (Mouse)","10090","Cytochrome c1, heme protein, mitochondrial (Complex III subunit 4) (Complex III subunit IV) (Cytochrome b-c1 complex subunit 4) (Ubiquinol-cytochrome-c reductase complex cytochrome c1 subunit) (Cytochrome c-1)","false","reviewed","3_2"
"8220","Mitochondrion","1.141","3","Ndufa10","Ndufa10","Q99LC3","1.192","Mus musculus (Mouse)","10090","NADH dehydrogenase [ubiquinone] 1 alpha subcomplex subunit 10, mitochondrial (Complex I-42kD) (CI-42kD) (NADH-ubiquinone oxidoreductase 42 kDa subunit)","false","reviewed","3_1"
"8221","Mitochondrion","0.862","3","Ndufs5","Ndufs5","Q99LY9","1.142","Mus musculus (Mouse)","10090","NADH dehydrogenase [ubiquinone] iron-sulfur protein 5 (Complex I-15 kDa) (CI-15 kDa) (NADH-ubiquinone oxidoreductase 15 kDa subunit) [Cleaved into: NADH dehydrogenase [ubiquinone] iron-sulfur protein 5, N-terminally processed]","false","reviewed","3_1"
"8222","Mitochondrion","1.121","4","Dlat","Dlat","Q8BMF4","1.145","Mus musculus (Mouse)","10090","Dihydrolipoyllysine-residue acetyltransferase component of pyruvate dehydrogenase complex, mitochondrial (EC 2.3.1.12) (Dihydrolipoamide acetyltransferase component of pyruvate dehydrogenase complex) (Pyruvate dehydrogenase complex component E2) (PDC-E2) (PDCE2)","false","reviewed","4_1"
"8223","Mitochondrion","1.08","4","Pc Pcx","Pc","Q05920","1.139","Mus musculus (Mouse)","10090","Pyruvate carboxylase, mitochondrial (EC 6.4.1.1) (Pyruvic carboxylase) (PCB)","false","reviewed","4_1"
"8224","Signaling Cascade","1.021","1","Mapk1 Erk2 Mapk Prkm1","Mapk1","P63085","0.966","Mus musculus (Mouse)","10090","Mitogen-activated protein kinase 1 (MAP kinase 1) (MAPK 1) (EC 2.7.11.24) (ERT1) (Extracellular signal-regulated kinase 2) (ERK-2) (MAP kinase isoform p42) (p42-MAPK) (Mitogen-activated protein kinase 2) (MAP kinase 2) (MAPK 2)","false","reviewed","1_1"
"8225","Synaptic Vesicle","0.881","1","Rab10","Rab10","P61027","0.979","Mus musculus (Mouse)","10090","Ras-related protein Rab-10","false","reviewed","1_6"
"8226","Signaling Cascade","0.987","1","Gdi2 Gdi3","Gdi2","Q61598","0.94","Mus musculus (Mouse)","10090","Rab GDP dissociation inhibitor beta (Rab GDI beta) (GDI-3) (Guanosine diphosphate dissociation inhibitor 2) (GDI-2)","false","reviewed","1_6"
"8227","Mitochondrion","1.09","3","Atp5b","Atp5b","P56480","1.193","Mus musculus (Mouse)","10090","ATP synthase subunit beta, mitochondrial (EC 3.6.3.14)","false","reviewed","3_2"
"8228","Signaling Cascade","0.876","4","Ppia","Ppia","P17742","0.849","Mus musculus (Mouse)","10090","Peptidyl-prolyl cis-trans isomerase A (PPIase A) (EC 5.2.1.8) (Cyclophilin A) (Cyclosporin A-binding protein) (Rotamase A) (SP18) [Cleaved into: Peptidyl-prolyl cis-trans isomerase A, N-terminally processed]","false","reviewed","4_3"
"8229","Signaling Cascade","0.921","1","Prkcb Pkcb Prkcb1","Prkcb","P68404","1.048","Mus musculus (Mouse)","10090","Protein kinase C beta type (PKC-B) (PKC-beta) (EC 2.7.11.13)","false","reviewed","1_1"
"8230","Mitochondrion","0.991","3","Phb","Phb","P67778","1.151","Mus musculus (Mouse)","10090","Prohibitin (B-cell receptor-associated protein 32) (BAP 32)","false","reviewed","3_3"
"8231","Cytoplasm","1.047","5","Aldh9a1","Aldh9a1","Q9JLJ2","1.096","Mus musculus (Mouse)","10090","4-trimethylaminobutyraldehyde dehydrogenase (TMABADH) (EC 1.2.1.47) (Aldehyde dehydrogenase family 9 member A1) (EC 1.2.1.3)","false","reviewed","5_2"
"8232","Mitochondrion","1.059","3","Atp5c1","Atp5c1","Q91VR2","1.171","Mus musculus (Mouse)","10090","ATP synthase subunit gamma, mitochondrial (F-ATPase gamma subunit)","false","reviewed","3_2"
"8233","Mitochondrion","0.827","3","Atp5l","Atp5l","Q9CPQ8","1.073","Mus musculus (Mouse)","10090","ATP synthase subunit g, mitochondrial (ATPase subunit g)","false","reviewed","3_1"
"8234","Mitochondrion","1.085","3","Ndufs1","Ndufs1","Q91VD9","1.185","Mus musculus (Mouse)","10090","NADH-ubiquinone oxidoreductase 75 kDa subunit, mitochondrial (EC 1.6.5.3) (EC 1.6.99.3) (Complex I-75kD) (CI-75kD)","false","reviewed","3_1"
"8235","Mitochondrion","1.078","3","Ndufb10","Ndufb10","Q9DCS9","1.12","Mus musculus (Mouse)","10090","NADH dehydrogenase [ubiquinone] 1 beta subcomplex subunit 10 (Complex I-PDSW) (CI-PDSW) (NADH-ubiquinone oxidoreductase PDSW subunit)","false","reviewed","3_1"
"8236","Mitochondrion","1.021","3","Uqcrfs1","Uqcrfs1","Q9CR68","1.099","Mus musculus (Mouse)","10090","Cytochrome b-c1 complex subunit Rieske, mitochondrial (EC 1.10.2.2) (Complex III subunit 5) (Cytochrome b-c1 complex subunit 5) (Rieske iron-sulfur protein) (RISP) (Ubiquinol-cytochrome c reductase iron-sulfur subunit) [Cleaved into: Cytochrome b-c1 complex subunit 11 (Complex III subunit IX) (Ubiquinol-cytochrome c reductase 8 kDa protein)]","false","reviewed","3_2"
"8237","Mitochondrion","1.046","6","Tst","Tst","P52196","1.224","Mus musculus (Mouse)","10090","Thiosulfate sulfurtransferase (EC 2.8.1.1) (Rhodanese)","false","reviewed","6_1"
"8238","Signaling Cascade","1.038","1","Prkaca Pkaca","Prkaca","P05132","0.862","Mus musculus (Mouse)","10090","cAMP-dependent protein kinase catalytic subunit alpha (PKA C-alpha) (EC 2.7.11.11)","false","reviewed","1_1"
"8239","Mitochondrion","0.963","3","Ndufb9","Ndufb9","Q9CQJ8","1.078","Mus musculus (Mouse)","10090","NADH dehydrogenase [ubiquinone] 1 beta subcomplex subunit 9 (Complex I-B22) (CI-B22) (NADH-ubiquinone oxidoreductase B22 subunit)","false","reviewed","3_1"
"8240","Mitochondrion","0.786","3","Atp5i Atp5k Lfm-1 Lfm1","Atp5i","Q06185","1.013","Mus musculus (Mouse)","10090","ATP synthase subunit e, mitochondrial (ATPase subunit e)","false","reviewed","3_2"
"8241","Mitochondrion","1.087","3","Ndufs7","Ndufs7","Q9DC70","1.183","Mus musculus (Mouse)","10090","NADH dehydrogenase [ubiquinone] iron-sulfur protein 7, mitochondrial (EC 1.6.5.3) (EC 1.6.99.3) (Complex I-20kD) (CI-20kD) (NADH-ubiquinone oxidoreductase 20 kDa subunit)","false","reviewed","3_1"
"8242","Mitochondrion","1.045","5","Hint2","Hint2","Q9D0S9","1.141","Mus musculus (Mouse)","10090","Histidine triad nucleotide-binding protein 2, mitochondrial (HINT-2) (EC 3.-.-.-) (HINT-3)","false","reviewed","5_4"
"8243","Synaptic Vesicle","0.881","2","Atp6v1f Atp6s14 Vatf","Atp6v1f","Q9D1K2","0.954","Mus musculus (Mouse)","10090","V-type proton ATPase subunit F (V-ATPase subunit F) (V-ATPase 14 kDa subunit) (Vacuolar proton pump subunit F)","false","reviewed","2_4"
"8244","Synaptic Vesicle","1.069","2","Atp6v0a1 Atp6n1","Atp6v0a1","Q9Z1G4","1.027","Mus musculus (Mouse)","10090","V-type proton ATPase 116 kDa subunit a isoform 1 (V-ATPase 116 kDa isoform a1) (Clathrin-coated vesicle/synaptic vesicle proton pump 116 kDa subunit) (Vacuolar adenosine triphosphatase subunit Ac116) (Vacuolar proton pump subunit 1) (Vacuolar proton translocating ATPase 116 kDa subunit a isoform 1)","false","reviewed","2_4"
"8245","Mitochondrion","1.036","4","Suclg1","Suclg1","Q9WUM5","1.14","Mus musculus (Mouse)","10090","Succinyl-CoA ligase [ADP/GDP-forming] subunit alpha, mitochondrial (EC 6.2.1.4) (EC 6.2.1.5) (Succinyl-CoA synthetase subunit alpha) (SCS-alpha)","false","reviewed","4_1"
"8246","Mitochondrion","1.111","5","Oxct1 Oxct Scot","Oxct1","Q9D0K2","1.23","Mus musculus (Mouse)","10090","Succinyl-CoA:3-ketoacid coenzyme A transferase 1, mitochondrial (EC 2.8.3.5) (3-oxoacid CoA-transferase 1) (Somatic-type succinyl-CoA:3-oxoacid CoA-transferase) (SCOT-s)","false","reviewed","5_1"
"8247","Mitochondrion","1.051","6","Trap1 Hsp75","Trap1","Q9CQN1","1.152","Mus musculus (Mouse)","10090","Heat shock protein 75 kDa, mitochondrial (HSP 75) (TNFR-associated protein 1) (Tumor necrosis factor type 1 receptor-associated protein) (TRAP-1)","false","reviewed","6_1"
"8248","Cytoplasm","1.067","6","Dnaja1 Dnaj2 Hsj2 Hspf4","Dnaja1","P63037","1.039","Mus musculus (Mouse)","10090","DnaJ homolog subfamily A member 1 (DnaJ protein homolog 2) (Heat shock 40 kDa protein 4) (Heat shock protein J2) (HSJ-2)","false","reviewed","6_2"
"8249","Mitochondrion","1.039","5","Etfb","Etfb","Q9DCW4","1.187","Mus musculus (Mouse)","10090","Electron transfer flavoprotein subunit beta (Beta-ETF)","false","reviewed","5_1"
"8250","Mitochondrion","0.927","3","Ndufa5","Ndufa5","Q9CPP6","1.163","Mus musculus (Mouse)","10090","NADH dehydrogenase [ubiquinone] 1 alpha subcomplex subunit 5 (Complex I subunit B13) (Complex I-13kD-B) (CI-13kD-B) (NADH-ubiquinone oxidoreductase 13 kDa-B subunit)","false","reviewed","3_1"
"8251","Signaling Cascade","0.988","5","Glul Glns","Glul","P15105","1.025","Mus musculus (Mouse)","10090","Glutamine synthetase (GS) (EC 6.3.1.2) (Glutamate decarboxylase) (EC 4.1.1.15) (Glutamate--ammonia ligase)","false","reviewed","5_2"
"8252","Synaptic Vesicle","1.028","1","Nsf Skd2","Nsf","P46460","1.081","Mus musculus (Mouse)","10090","Vesicle-fusing ATPase (EC 3.6.4.6) (N-ethylmaleimide-sensitive fusion protein) (NEM-sensitive fusion protein) (Suppressor of K(+) transport growth defect 2) (Protein SKD2) (Vesicular-fusion protein NSF)","false","reviewed","1_3"
"8253","Signaling Cascade","0.956","5","Calb2","Calb2","Q08331","0.855","Mus musculus (Mouse)","10090","Calretinin (CR)","false","reviewed","5_1"
"8254","Mitochondrion","1.117","5","Decr1","Decr1","Q9CQ62","1.26","Mus musculus (Mouse)","10090","2,4-dienoyl-CoA reductase, mitochondrial (EC 1.3.1.34) (2,4-dienoyl-CoA reductase [NADPH]) (4-enoyl-CoA reductase [NADPH])","false","reviewed","5_1"
"8255","Mitochondrion","1.124","3","Cycs","Cycs","P62897","1.192","Mus musculus (Mouse)","10090","Cytochrome c, somatic","false","reviewed","3_2"
"8256","Mitochondrion","1.077","4","Dlst","Dlst","Q9D2G2","1.229","Mus musculus (Mouse)","10090","Dihydrolipoyllysine-residue succinyltransferase component of 2-oxoglutarate dehydrogenase complex, mitochondrial (EC 2.3.1.61) (2-oxoglutarate dehydrogenase complex component E2) (OGDC-E2) (Dihydrolipoamide succinyltransferase component of 2-oxoglutarate dehydrogenase complex) (E2K)","false","reviewed","4_1"
"8257","Mitochondrion","1.057","3","Ndufb6 Gm137","Ndufb6","Q3UIU2","1.011","Mus musculus (Mouse)","10090","NADH dehydrogenase [ubiquinone] 1 beta subcomplex subunit 6 (Complex I-B17) (CI-B17) (NADH-ubiquinone oxidoreductase B17 subunit)","false","reviewed","3_1"
"8258","Signaling Cascade","1.079","1","Map2k1 Mek1 Prkmk1","Map2k1","P31938","0.95","Mus musculus (Mouse)","10090","Dual specificity mitogen-activated protein kinase kinase 1 (MAP kinase kinase 1) (MAPKK 1) (EC 2.7.12.2) (ERK activator kinase 1) (MAPK/ERK kinase 1) (MEK 1)","false","reviewed","1_1"
"8259","Synaptic Vesicle","1.072","2","Ap2a2 Adtab","Ap2a2","P17427","0.967","Mus musculus (Mouse)","10090","AP-2 complex subunit alpha-2 (100 kDa coated vesicle protein C) (Adaptor protein complex AP-2 subunit alpha-2) (Adaptor-related protein complex 2 subunit alpha-2) (Alpha-adaptin C) (Alpha2-adaptin) (Clathrin assembly protein complex 2 alpha-C large chain) (Plasma membrane adaptor HA2/AP2 adaptin alpha C subunit)","false","reviewed","2_3"
"8260","Synaptic Vesicle","1.066","2","Ap2a1 Adtaa Clapa1","Ap2a1","P17426","0.961","Mus musculus (Mouse)","10090","AP-2 complex subunit alpha-1 (100 kDa coated vesicle protein A) (Adaptor protein complex AP-2 subunit alpha-1) (Adaptor-related protein complex 2 subunit alpha-1) (Alpha-adaptin A) (Alpha1-adaptin) (Clathrin assembly protein complex 2 alpha-A large chain) (Plasma membrane adaptor HA2/AP2 adaptin alpha A subunit)","false","reviewed","2_3"
"8261","Synaptic Vesicle","1.038","2","Atp6v1d Atp6m Vatd","Atp6v1d","P57746","0.909","Mus musculus (Mouse)","10090","V-type proton ATPase subunit D (V-ATPase subunit D) (V-ATPase 28 kDa accessory protein) (Vacuolar proton pump subunit D)","false","reviewed","2_4"
"8262","Synaptic Vesicle","1.044","2","Atp6v1a Atp6a1 Atp6a2 Atp6v1a1","Atp6v1a","P50516","0.941","Mus musculus (Mouse)","10090","V-type proton ATPase catalytic subunit A (V-ATPase subunit A) (EC 3.6.3.14) (V-ATPase 69 kDa subunit) (Vacuolar proton pump subunit alpha)","false","reviewed","2_1"
"8263","Mitochondrion","1.095","4","Idh3g","Idh3g","P70404","1.125","Mus musculus (Mouse)","10090","Isocitrate dehydrogenase [NAD] subunit gamma 1, mitochondrial (EC 1.1.1.41) (Isocitric dehydrogenase subunit gamma) (NAD(+)-specific ICDH subunit gamma)","false","reviewed","4_1"
"8264","Mitochondrion","1.006","5","Mtx2 MNCb-0780","Mtx2","O88441","1.008","Mus musculus (Mouse)","10090","Metaxin-2 (Mitochondrial outer membrane import complex protein 2)","false","reviewed","5_6"
"8265","Cytoplasm","0.957","1","Otub1","Otub1","Q7TQI3","0.96","Mus musculus (Mouse)","10090","Ubiquitin thioesterase OTUB1 (EC 3.4.19.12) (Deubiquitinating enzyme OTUB1) (OTU domain-containing ubiquitin aldehyde-binding protein 1) (Otubain-1) (Ubiquitin-specific-processing protease OTUB1)","false","reviewed","1_10"
"8266","Synaptic Vesicle","0.978","4","Tpi1 Tpi","Tpi1","P17751","0.919","Mus musculus (Mouse)","10090","Triosephosphate isomerase (TIM) (EC 5.3.1.1) (Triose-phosphate isomerase)","false","reviewed","4_2"
"8267","Synaptic Vesicle","1.03","4","Pgk1 Pgk-1","Pgk1","P09411","0.922","Mus musculus (Mouse)","10090","Phosphoglycerate kinase 1 (EC 2.7.2.3)","false","reviewed","4_2"
"8268","Mitochondrion","1.058","3","Ndufa7","Ndufa7","Q9Z1P6","1.134","Mus musculus (Mouse)","10090","NADH dehydrogenase [ubiquinone] 1 alpha subcomplex subunit 7 (Complex I-B14.5a) (CI-B14.5a) (NADH-ubiquinone oxidoreductase subunit B14.5a)","false","reviewed","3_1"
"8269","Plasma Membrane","1.032","1","Gabrb2 Gabrb-2","Gabrb2","P63137","1.085","Mus musculus (Mouse)","10090","Gamma-aminobutyric acid receptor subunit beta-2 (GABA(A) receptor subunit beta-2)","false","reviewed","1_11"
"8270","Plasma Membrane","0.906","1","Gabra1 Gabra-1","Gabra1","P62812","1.111","Mus musculus (Mouse)","10090","Gamma-aminobutyric acid receptor subunit alpha-1 (GABA(A) receptor subunit alpha-1)","false","reviewed","1_11"
"8271","Mitochondrion","0.978","3","Gpx4","Gpx4","O70325","1.067","Mus musculus (Mouse)","10090","Phospholipid hydroperoxide glutathione peroxidase, mitochondrial (PHGPx) (EC 1.11.1.12) (Glutathione peroxidase 4) (GPx-4) (GSHPx-4)","false","reviewed","3_3"
"8272","Mitochondrion","0.692","3","Cox7a2 Cox7a3 Cox7al","Cox7a2","P48771","1.003","Mus musculus (Mouse)","10090","Cytochrome c oxidase subunit 7A2, mitochondrial (Cytochrome c oxidase subunit VIIa-liver/heart) (Cytochrome c oxidase subunit VIIa-L)","false","reviewed","3_3"
"8273","Mitochondrion","1.045","5","Maoa","Maoa","Q64133","1.086","Mus musculus (Mouse)","10090","Amine oxidase [flavin-containing] A (EC 1.4.3.4) (Monoamine oxidase type A) (MAO-A)","false","reviewed","5_2"
"8274","Mitochondrion","1.123","5","Aldh2 Ahd-1 Ahd1","Aldh2","P47738","1.265","Mus musculus (Mouse)","10090","Aldehyde dehydrogenase, mitochondrial (EC 1.2.1.3) (AHD-M1) (ALDH class 2) (ALDH-E2) (ALDHI)","false","reviewed","5_2"
"8275","Cytoskeleton","0.97","1","Pafah1b1 Lis-1 Lis1 Pafaha","Pafah1b1","P63005","0.998","Mus musculus (Mouse)","10090","Platelet-activating factor acetylhydrolase IB subunit alpha (Lissencephaly-1 protein) (LIS-1) (PAF acetylhydrolase 45 kDa subunit) (PAF-AH 45 kDa subunit) (PAF-AH alpha) (PAFAH alpha)","false","reviewed","1_7"
"8276","Cytoskeleton","1.034","1","Mapre3","Mapre3","Q6PER3","1.014","Mus musculus (Mouse)","10090","Microtubule-associated protein RP/EB family member 3 (EB1 protein family member 3) (EBF3) (End-binding protein 3) (EB3) (RP3)","false","reviewed","1_7"
"8277","Signaling Cascade","1.053","2","Pip5k1c Kiaa0589","Pip5k1c","O70161","0.945","Mus musculus (Mouse)","10090","Phosphatidylinositol 4-phosphate 5-kinase type-1 gamma (PIP5K1-gamma) (PtdIns(4)P-5-kinase 1 gamma) (EC 2.7.1.68) (Phosphatidylinositol 4-phosphate 5-kinase type I gamma) (PIP5KIgamma)","false","reviewed","2_5"
"8278","Plasma Membrane","0.946","2","Plcb1 Plcb","Plcb1","Q9Z1B3","0.989","Mus musculus (Mouse)","10090","1-phosphatidylinositol 4,5-bisphosphate phosphodiesterase beta-1 (EC 3.1.4.11) (PLC-154) (Phosphoinositide phospholipase C-beta-1) (Phospholipase C-beta-1) (PLC-beta-1)","false","reviewed","2_5"
"8279","Mitochondrion","1.092","5","Etfdh","Etfdh","Q921G7","1.141","Mus musculus (Mouse)","10090","Electron transfer flavoprotein-ubiquinone oxidoreductase, mitochondrial (ETF-QO) (ETF-ubiquinone oxidoreductase) (EC 1.5.5.1) (Electron-transferring-flavoprotein dehydrogenase) (ETF dehydrogenase)","false","reviewed","5_1"
"8280","Mitochondrion","1.069","5","Acaa2","Acaa2","Q8BWT1","1.123","Mus musculus (Mouse)","10090","3-ketoacyl-CoA thiolase, mitochondrial (EC 2.3.1.16) (Acetyl-CoA acyltransferase) (Beta-ketothiolase) (Mitochondrial 3-oxoacyl-CoA thiolase)","false","reviewed","5_1"
"8281","Mitochondrion","1.109","3","Sdhb","Sdhb","Q9CQA3","1.162","Mus musculus (Mouse)","10090","Succinate dehydrogenase [ubiquinone] iron-sulfur subunit, mitochondrial (EC 1.3.5.1) (Iron-sulfur subunit of complex II) (Ip)","false","reviewed","3_2"
"8282","Mitochondrion","0.746","3","Cox5a","Cox5a","P12787","1.047","Mus musculus (Mouse)","10090","Cytochrome c oxidase subunit 5A, mitochondrial (Cytochrome c oxidase polypeptide Va)","false","reviewed","3_2"
"8283","Mitochondrion","1.196","5","Hadh Hadhsc Mschad Schad","Hadh","Q61425","1.323","Mus musculus (Mouse)","10090","Hydroxyacyl-coenzyme A dehydrogenase, mitochondrial (HCDH) (EC 1.1.1.35) (Medium and short-chain L-3-hydroxyacyl-coenzyme A dehydrogenase) (Short-chain 3-hydroxyacyl-CoA dehydrogenase)","false","reviewed","5_1"
"8284","Mitochondrion","1.144","5","Etfa","Etfa","Q99LC5","1.242","Mus musculus (Mouse)","10090","Electron transfer flavoprotein subunit alpha, mitochondrial (Alpha-ETF)","false","reviewed","5_1"
"8285","Mitochondrion","1.044","4","Samm50","Samm50","Q8BGH2","1.129","Mus musculus (Mouse)","10090","Sorting and assembly machinery component 50 homolog","false","reviewed","4_6"
"8286","Signaling Cascade","0.917","3","Park7","Park7","Q99LX0","0.907","Mus musculus (Mouse)","10090","Protein DJ-1 (EC 3.4.-.-) (Parkinson disease protein 7 homolog)","false","reviewed","3_3"
"8287","Signaling Cascade","0.999","2","Arf6","Arf6","P62331","1.007","Mus musculus (Mouse)","10090","ADP-ribosylation factor 6","false","reviewed","2_5"
"8288","Mitochondrion","1.033","3","Coq9","Coq9","Q8K1Z0","1.245","Mus musculus (Mouse)","10090","Ubiquinone biosynthesis protein COQ9, mitochondrial","false","reviewed","3_1"
"8289","Signaling Cascade","1.072","6","Hsp90ab1 Hsp84 Hsp84-1 Hspcb","Hsp90ab1","P11499","0.959","Mus musculus (Mouse)","10090","Heat shock protein HSP 90-beta (Heat shock 84 kDa) (HSP 84) (HSP84) (Tumor-specific transplantation 84 kDa antigen) (TSTA)","false","reviewed","6_2"
"8290","Synaptic Vesicle","1.053","4","Aldoa Aldo1","Aldoa","P05064","0.875","Mus musculus (Mouse)","10090","Fructose-bisphosphate aldolase A (EC 4.1.2.13) (Aldolase 1) (Muscle-type aldolase)","false","reviewed","4_2"
"8291","Synaptic Vesicle","1.185","4","Hk1","Hk1","P17710","1.155","Mus musculus (Mouse)","10090","Hexokinase-1 (EC 2.7.1.1) (Hexokinase type I) (HK I) (Hexokinase, tumor isozyme)","false","reviewed","4_2"
"8292","Cytoplasm","0.977","5","Gad2 Gad65","Gad2","P48320","0.911","Mus musculus (Mouse)","10090","Glutamate decarboxylase 2 (EC 4.1.1.15) (65 kDa glutamic acid decarboxylase) (GAD-65) (Glutamate decarboxylase 65 kDa isoform)","false","reviewed","5_2"
"8293","Mitochondrion","1.169","5","Abat Gabat","Abat","P61922","1.205","Mus musculus (Mouse)","10090","4-aminobutyrate aminotransferase, mitochondrial (EC 2.6.1.19) ((S)-3-amino-2-methylpropionate transaminase) (EC 2.6.1.22) (GABA aminotransferase) (GABA-AT) (Gamma-amino-N-butyrate transaminase) (GABA transaminase) (GABA-T) (L-AIBAT)","false","reviewed","5_2"
"8294","Plasma Membrane","1.0","1","App","App","P12023","1.0","Mus musculus (Mouse)","10090","Amyloid beta A4 protein (ABPP) (APP) (Alzheimer disease amyloid A4 protein homolog) (Amyloidogenic glycoprotein) (AG) [Cleaved into: N-APP; Soluble APP-alpha (S-APP-alpha); Soluble APP-beta (S-APP-beta); C99 (APP-C99); Beta-amyloid protein 42 (Beta-APP42); Beta-amyloid protein 40 (Beta-APP40); C83; P3(42); P3(40); C80; Gamma-secretase C-terminal fragment 59 (APP-C59) (Amyloid intracellular domain 59) (AID(59)) (Gamma-CTF(59)); Gamma-secretase C-terminal fragment 57 (APP-C57) (Amyloid intracellular domain 57) (AID(57)) (Gamma-CTF(57)); Gamma-secretase C-terminal fragment 50 (Amyloid intracellular domain 50) (AID(50)) (Gamma-CTF(50)); C31]","false","reviewed","1_2"
"8295","Synaptic Vesicle","1.06","2","Atp6v1b2 Atp6b2 Vat2","Atp6v1b2","P62814","0.95","Mus musculus (Mouse)","10090","V-type proton ATPase subunit B, brain isoform (V-ATPase subunit B 2) (Endomembrane proton pump 58 kDa subunit) (Vacuolar proton pump subunit B 2)","false","reviewed","2_4"
"8296","Cytoskeleton","0.997","1","Epb41l3 Dal1 Epb4.1l3 Kiaa0987","Epb41l3","Q9WV92","0.982","Mus musculus (Mouse)","10090","Band 4.1-like protein 3 (4.1B) (Differentially expressed in adenocarcinoma of the lung protein 1) (DAL-1) (DAL1P) (mDAL-1) [Cleaved into: Band 4.1-like protein 3, N-terminally processed]","false","reviewed","1_9"
"8297","Plasma Membrane","0.949","1","Cadm1 Igsf4 Necl2 Ra175 Syncam SynCam1 Tslc1","Cadm1","Q8R5M8","0.99","Mus musculus (Mouse)","10090","Cell adhesion molecule 1 (Immunoglobulin superfamily member 4) (IgSF4) (Nectin-like protein 2) (NECL-2) (Spermatogenic immunoglobulin superfamily) (SgIgSF) (Synaptic cell adhesion molecule) (SynCAM) (Tumor suppressor in lung cancer 1) (TSLC-1)","false","reviewed","1_9"
"8298","Plasma Membrane","0.907","1","Stx1a","Stx1a","O35526","1.043","Mus musculus (Mouse)","10090","Syntaxin-1A (Neuron-specific antigen HPC-1)","false","reviewed","1_3"
"8299","Plasma Membrane","0.904","1","Gabbr1","Gabbr1","Q9WV18","1.01","Mus musculus (Mouse)","10090","Gamma-aminobutyric acid type B receptor subunit 1 (GABA-B receptor 1) (GABA-B-R1) (GABA-BR1) (GABABR1) (Gb1)","false","reviewed","1_2"
"8300","Mitochondrion","0.832","3","Cox6b1 Cox6b","Cox6b1","P56391","1.275","Mus musculus (Mouse)","10090","Cytochrome c oxidase subunit 6B1 (Cytochrome c oxidase subunit VIb isoform 1) (COX VIb-1)","false","reviewed","3_2"
"8301","Mitochondrion","1.147","3","D10Jhu81e","D10Jhu81e","Q9D172","1.214","Mus musculus (Mouse)","10090","ES1 protein homolog, mitochondrial","false","reviewed","3_1"
"8302","Synaptic Vesicle","0.929","1","Vamp1 Syb1","Vamp1","Q62442","0.924","Mus musculus (Mouse)","10090","Vesicle-associated membrane protein 1 (VAMP-1) (Synaptobrevin-1)","false","reviewed","1_3"
"8303","Mitochondrion","1.08","4","Glud1 Glud","Glud1","P26443","1.301","Mus musculus (Mouse)","10090","Glutamate dehydrogenase 1, mitochondrial (GDH 1) (EC 1.4.1.3)","false","reviewed","4_1"
"8304","Cytoplasm","0.982","5","Grhpr Glxr","Grhpr","Q91Z53","0.997","Mus musculus (Mouse)","10090","Glyoxylate reductase/hydroxypyruvate reductase (EC 1.1.1.79) (EC 1.1.1.81)","false","reviewed","5_4"
"8305","Cytoskeleton","1.014","1","Dctn2","Dctn2","Q99KJ8","0.953","Mus musculus (Mouse)","10090","Dynactin subunit 2 (50 kDa dynein-associated polypeptide) (Dynactin complex 50 kDa subunit) (DCTN-50) (Growth cone membrane protein 23-48K) (GMP23-48K) (p50 dynamitin)","false","reviewed","1_7"
"8306","Cytoskeleton","0.88","1","Dctn1","Dctn1","O08788","1.023","Mus musculus (Mouse)","10090","Dynactin subunit 1 (150 kDa dynein-associated polypeptide) (DAP-150) (DP-150) (p150-glued)","false","reviewed","1_7"
"8307","Mitochondrion","1.138","4","Aco2","Aco2","Q99KI0","1.231","Mus musculus (Mouse)","10090","Aconitate hydratase, mitochondrial (Aconitase) (EC 4.2.1.3) (Citrate hydro-lyase)","false","reviewed","4_1"
"8308","Mitochondrion","1.052","3","Ndufa13 Grim19","Ndufa13","Q9ERS2","1.164","Mus musculus (Mouse)","10090","NADH dehydrogenase [ubiquinone] 1 alpha subcomplex subunit 13 (Cell death regulatory protein GRIM-19) (Complex I-B16.6) (CI-B16.6) (Gene associated with retinoic and interferon-induced mortality 19 protein) (GRIM-19) (Gene associated with retinoic and IFN-induced mortality 19 protein) (NADH-ubiquinone oxidoreductase B16.6 subunit)","false","reviewed","3_1"
"8309","Mitochondrion","1.119","4","Fh Fh1","Fh","P97807","1.186","Mus musculus (Mouse)","10090","Fumarate hydratase, mitochondrial (Fumarase) (EC 4.2.1.2) (EF-3)","false","reviewed","4_1"
"8310","Signaling Cascade","1.144","1","Camk2d Kiaa4163","Camk2d","Q6PHZ2","0.941","Mus musculus (Mouse)","10090","Calcium/calmodulin-dependent protein kinase type II subunit delta (CaM kinase II subunit delta) (CaMK-II subunit delta) (EC 2.7.11.17)","false","reviewed","1_1"
"8311","Cytoskeleton","1.043","1","Actb","Actb","P60710","1.007","Mus musculus (Mouse)","10090","Actin, cytoplasmic 1 (Beta-actin) [Cleaved into: Actin, cytoplasmic 1, N-terminally processed]","false","reviewed","1_8"
"8312","Signaling Cascade","1.043","1","Ctnnb1 Catnb","Ctnnb1","Q02248","0.972","Mus musculus (Mouse)","10090","Catenin beta-1 (Beta-catenin)","false","reviewed","1_5"
"8313","Signaling Cascade","0.946","1","Src","Src","P05480","0.991","Mus musculus (Mouse)","10090","Neuronal proto-oncogene tyrosine-protein kinase Src (EC 2.7.10.2) (Proto-oncogene c-Src) (pp60c-src) (p60-Src)","false","reviewed","1_5"
"8314","Mitochondrion","1.107","1","Slc25a5 Ant2","Slc25a5","P51881","1.139","Mus musculus (Mouse)","10090","ADP/ATP translocase 2 (ADP,ATP carrier protein 2) (Adenine nucleotide translocator 2) (ANT 2) (Solute carrier family 25 member 5) [Cleaved into: ADP/ATP translocase 2, N-terminally processed]","false","reviewed","1_5"
"8315","Mitochondrion","1.074","3","Ndufs2","Ndufs2","Q91WD5","1.105","Mus musculus (Mouse)","10090","NADH dehydrogenase [ubiquinone] iron-sulfur protein 2, mitochondrial (EC 1.6.5.3) (EC 1.6.99.3) (Complex I-49kD) (CI-49kD) (NADH-ubiquinone oxidoreductase 49 kDa subunit)","false","reviewed","3_1"
"8316","Mitochondrion","1.101","4","Sdha","Sdha","Q8K2B3","1.203","Mus musculus (Mouse)","10090","Succinate dehydrogenase [ubiquinone] flavoprotein subunit, mitochondrial (EC 1.3.5.1) (Flavoprotein subunit of complex II) (Fp)","false","reviewed","4_1"
"8317","Cytoskeleton","0.97","1","Tuba1a Tuba1","Tuba1a","P68369","1.026","Mus musculus (Mouse)","10090","Tubulin alpha-1A chain (Alpha-tubulin 1) (Alpha-tubulin isotype M-alpha-1) (Tubulin alpha-1 chain)","false","reviewed","1_3"
"8318","Mitochondrion","1.094","3","Slc25a3","Slc25a3","Q8VEM8","1.153","Mus musculus (Mouse)","10090","Phosphate carrier protein, mitochondrial (Phosphate transport protein) (PTP) (Solute carrier family 25 member 3)","false","reviewed","3_2"
"8319","Mitochondrion","1.034","5","Mccc2","Mccc2","Q3ULD5","1.218","Mus musculus (Mouse)","10090","Methylcrotonoyl-CoA carboxylase beta chain, mitochondrial (MCCase subunit beta) (EC 6.4.1.4) (3-methylcrotonyl-CoA carboxylase 2) (3-methylcrotonyl-CoA carboxylase non-biotin-containing subunit) (3-methylcrotonyl-CoA:carbon dioxide ligase subunit beta)","false","reviewed","5_3"
"8320","Mitochondrion","1.033","5","Clybl Clb","Clybl","Q8R4N0","1.1","Mus musculus (Mouse)","10090","Citrate lyase subunit beta-like protein, mitochondrial (Citrate lyase beta-like) (EC 4.1.-.-)","false","reviewed","5_3"
"8321","Mitochondrion","0.876","3","Ndufs6 Ip13","Ndufs6","P52503","1.07","Mus musculus (Mouse)","10090","NADH dehydrogenase [ubiquinone] iron-sulfur protein 6, mitochondrial (Complex I-13kD-A) (CI-13kD-A) (NADH-ubiquinone oxidoreductase 13 kDa-A subunit)","false","reviewed","3_3"
"8322","Signaling Cascade","0.898","2","Grb2","Grb2","Q60631","0.84","Mus musculus (Mouse)","10090","Growth factor receptor-bound protein 2 (Adapter protein GRB2) (SH2/SH3 adapter GRB2)","false","reviewed","2_2"
"8323","Synaptic Vesicle","1.247","2","Syp","Syp","Q62277","0.923","Mus musculus (Mouse)","10090","Synaptophysin (BM89 antigen) (Major synaptic vesicle protein p38)","false","reviewed","2_6"
"8324","Mitochondrion","0.896","3","Timm10 Tim10","Timm10","P62073","1.193","Mus musculus (Mouse)","10090","Mitochondrial import inner membrane translocase subunit Tim10","false","reviewed","3_3"
"8325","Mitochondrion","0.997","3","Prdx5 Prdx6","Prdx5","P99029","1.106","Mus musculus (Mouse)","10090","Peroxiredoxin-5, mitochondrial (EC 1.11.1.15) (Antioxidant enzyme B166) (AOEB166) (Liver tissue 2D-page spot 2D-0014IV) (PLP) (Peroxiredoxin V) (Prx-V) (Peroxisomal antioxidant enzyme) (Thioredoxin peroxidase PMP20) (Thioredoxin reductase)","false","reviewed","3_3"
"8326","Signaling Cascade","0.81","1","Ywhab","Ywhab","Q9CQV8","0.873","Mus musculus (Mouse)","10090","14-3-3 protein beta/alpha (Protein kinase C inhibitor protein 1) (KCIP-1) [Cleaved into: 14-3-3 protein beta/alpha, N-terminally processed]","false","reviewed","1_2"
"8327","Signaling Cascade","1.065","3","Acot13 Them2","Acot13","Q9CQR4","1.213","Mus musculus (Mouse)","10090","Acyl-coenzyme A thioesterase 13 (Acyl-CoA thioesterase 13) (EC 3.1.2.-) (Thioesterase superfamily member 2) [Cleaved into: Acyl-coenzyme A thioesterase 13, N-terminally processed]","false","reviewed","3_1"
"8328","Signaling Cascade","0.93","4","Tkt","Tkt","P40142","0.985","Mus musculus (Mouse)","10090","Transketolase (TK) (EC 2.2.1.1) (P68)","false","reviewed","4_2"
"8329","Signaling Cascade","0.37","1","Gng2","Gng2","P63213","0.536","Mus musculus (Mouse)","10090","Guanine nucleotide-binding protein G(I)/G(S)/G(O) subunit gamma-2 (G gamma-I)","false","reviewed","1_3"
"8330","Signaling Cascade","1.027","1","Gnb1","Gnb1","P62874","0.87","Mus musculus (Mouse)","10090","Guanine nucleotide-binding protein G(I)/G(S)/G(T) subunit beta-1 (Transducin beta chain 1)","false","reviewed","1_3"
"8331","Mitochondrion","1.055","5","Aldh6a1","Aldh6a1","Q9EQ20","1.219","Mus musculus (Mouse)","10090","Methylmalonate-semialdehyde dehydrogenase [acylating], mitochondrial (MMSDH) (Malonate-semialdehyde dehydrogenase [acylating]) (EC 1.2.1.18) (EC 1.2.1.27) (Aldehyde dehydrogenase family 6 member A1)","false","reviewed","5_2"
"8332","Mitochondrion","1.012","3","Ppif","Ppif","Q99KR7","1.173","Mus musculus (Mouse)","10090","Peptidyl-prolyl cis-trans isomerase F, mitochondrial (PPIase F) (EC 5.2.1.8) (Cyclophilin D) (CyP-D) (CypD) (Cyclophilin F) (Rotamase F)","false","reviewed","3_2"
"8333","Mitochondrion","0.946","3","C1qbp Gc1qbp","C1qbp","O35658","1.141","Mus musculus (Mouse)","10090","Complement component 1 Q subcomponent-binding protein, mitochondrial (GC1q-R protein) (Glycoprotein gC1qBP) (C1qBP)","false","reviewed","3_2"
"8334","Mitochondrion","1.134","3","Ndufa12","Ndufa12","Q7TMF3","1.11","Mus musculus (Mouse)","10090","NADH dehydrogenase [ubiquinone] 1 alpha subcomplex subunit 12 (Complex I-B17.2) (CI-B17.2) (CIB17.2) (NADH-ubiquinone oxidoreductase subunit B17.2)","false","reviewed","3_1"
"8335","Mitochondrion","0.991","3","Atp5h","Atp5h","Q9DCX2","1.226","Mus musculus (Mouse)","10090","ATP synthase subunit d, mitochondrial (ATPase subunit d)","false","reviewed","3_2"
"8336","Plasma Membrane","0.924","1","Cd47","Cd47","Q61735","1.016","Mus musculus (Mouse)","10090","Leukocyte surface antigen CD47 (Integrin-associated protein) (IAP) (CD antigen CD47)","false","reviewed","1_6"
"8337","Plasma Membrane","0.955","1","Sirpa Bit Myd1 Ptpns1 Shps1 Sirp","Sirpa","P97797","1.005","Mus musculus (Mouse)","10090","Tyrosine-protein phosphatase non-receptor type substrate 1 (SHP substrate 1) (SHPS-1) (Brain Ig-like molecule with tyrosine-based activation motifs) (Bit) (CD172 antigen-like family member A) (Inhibitory receptor SHPS-1) (MyD-1 antigen) (Signal-regulatory protein alpha-1) (Sirp-alpha-1) (mSIRP-alpha1) (p84) (CD antigen CD172a)","false","reviewed","1_6"
"8338","Synaptic Vesicle","0.956","2","Atp6v1e1 Atp6e Atp6e2","Atp6v1e1","P50518","0.897","Mus musculus (Mouse)","10090","V-type proton ATPase subunit E 1 (V-ATPase subunit E 1) (V-ATPase 31 kDa subunit) (p31) (Vacuolar proton pump subunit E 1)","false","reviewed","2_4"
"8339","Synaptic Vesicle","0.999","2","Atp6v1h","Atp6v1h","Q8BVE3","0.899","Mus musculus (Mouse)","10090","V-type proton ATPase subunit H (V-ATPase subunit H) (Vacuolar proton pump subunit H)","false","reviewed","2_4"
"8340","Plasma Membrane","0.995","1","Mpp6 Dlgh4 Pals2","Mpp6","Q9JLB0","0.963","Mus musculus (Mouse)","10090","MAGUK p55 subfamily member 6 (Dlgh4 protein) (P55T protein) (Protein associated with Lin-7 2)","false","reviewed","1_9"
"8341","Plasma Membrane","0.956","1","Cadm3 Igsf4b Necl1 Syncam3 Tsll1","Cadm3","Q99N28","1.038","Mus musculus (Mouse)","10090","Cell adhesion molecule 3 (Immunoglobulin superfamily member 4B) (IgSF4B) (Nectin-like protein 1) (NECL-1) (Synaptic cell adhesion molecule 3) (TSLC1-like protein 1)","false","reviewed","1_9"
"8342","Mitochondrion","0.874","3","Cox5b","Cox5b","P19536","1.106","Mus musculus (Mouse)","10090","Cytochrome c oxidase subunit 5B, mitochondrial (Cytochrome c oxidase polypeptide Vb)","false","reviewed","3_2"
"8343","Signaling Cascade","0.918","6","Stip1","Stip1","Q60864","0.826","Mus musculus (Mouse)","10090","Stress-induced-phosphoprotein 1 (STI1) (mSTI1) (Hsc70/Hsp90-organizing protein) (Hop)","false","reviewed","6_2"
"8344","Plasma Membrane","1.049","6","Dnaja2","Dnaja2","Q9QYJ0","0.954","Mus musculus (Mouse)","10090","DnaJ homolog subfamily A member 2 (mDj3)","false","reviewed","6_4"
"8345","Synaptic Vesicle","1.028","2","Cltc","Cltc","Q68FD5","0.994","Mus musculus (Mouse)","10090","Clathrin heavy chain 1","false","reviewed","2_3"
"8346","Cytoskeleton","1.016","1","Arpc1a Sid329","Arpc1a","Q9R0Q6","0.928","Mus musculus (Mouse)","10090","Actin-related protein 2/3 complex subunit 1A (SOP2-like protein) (Sid 329)","false","reviewed","1_8"
"8347","Cytoskeleton","0.917","1","Arpc3","Arpc3","Q9JM76","0.995","Mus musculus (Mouse)","10090","Actin-related protein 2/3 complex subunit 3 (Arp2/3 complex 21 kDa subunit) (p21-ARC)","false","reviewed","1_8"
"8348","Mitochondrion","1.086","3","Ndufv1","Ndufv1","Q91YT0","1.203","Mus musculus (Mouse)","10090","NADH dehydrogenase [ubiquinone] flavoprotein 1, mitochondrial (EC 1.6.5.3) (EC 1.6.99.3) (Complex I-51kD) (CI-51kD) (NADH-ubiquinone oxidoreductase 51 kDa subunit)","false","reviewed","3_1"
"8349","Mitochondrion","0.974","3","Ndufa8","Ndufa8","Q9DCJ5","1.236","Mus musculus (Mouse)","10090","NADH dehydrogenase [ubiquinone] 1 alpha subcomplex subunit 8 (Complex I-19kD) (CI-19kD) (Complex I-PGIV) (CI-PGIV) (NADH-ubiquinone oxidoreductase 19 kDa subunit)","false","reviewed","3_1"
"8350","Plasma Membrane","0.917","1","Snap25 Snap","Snap25","P60879","0.997","Mus musculus (Mouse)","10090","Synaptosomal-associated protein 25 (SNAP-25) (Super protein) (SUP) (Synaptosomal-associated 25 kDa protein)","false","reviewed","1_3"
"8351","Signaling Cascade","1.048","2","Nckap1 Hem2 Kiaa0587 Nap1","Nckap1","P28660","0.937","Mus musculus (Mouse)","10090","Nck-associated protein 1 (NAP 1) (Brain protein H19) (MH19) (Membrane-associated protein HEM-2) (p125Nap1)","false","reviewed","2_1"
"8352","Mitochondrion","1.017","5","Hsd17b10 Erab Hadh2","Hsd17b10","O08756","1.107","Mus musculus (Mouse)","10090","3-hydroxyacyl-CoA dehydrogenase type-2 (EC 1.1.1.35) (17-beta-hydroxysteroid dehydrogenase 10) (17-beta-HSD 10) (EC 1.1.1.51) (3-hydroxy-2-methylbutyryl-CoA dehydrogenase) (EC 1.1.1.178) (3-hydroxyacyl-CoA dehydrogenase type II) (Endoplasmic reticulum-associated amyloid beta-peptide-binding protein) (Mitochondrial ribonuclease P protein 2) (Mitochondrial RNase P protein 2) (Type II HADH)","false","reviewed","5_1"
"8353","Mitochondrion","1.135","5","Hadhb","Hadhb","Q99JY0","1.175","Mus musculus (Mouse)","10090","Trifunctional enzyme subunit beta, mitochondrial (TP-beta) [Includes: 3-ketoacyl-CoA thiolase (EC 2.3.1.16) (Acetyl-CoA acyltransferase) (Beta-ketothiolase)]","false","reviewed","5_1"
"8354","Signaling Cascade","1.059","1","Prnp Prn-p Prp","Prnp","P04925","0.963","Mus musculus (Mouse)","10090","Major prion protein (PrP) (PrP27-30) (PrP33-35C) (CD antigen CD230)","false","reviewed","1_2"
"8355","Signaling Cascade","0.955","1","Fyn","Fyn","P39688","1.034","Mus musculus (Mouse)","10090","Tyrosine-protein kinase Fyn (EC 2.7.10.2) (Proto-oncogene c-Fyn) (p59-Fyn)","false","reviewed","1_5"
"8356","Signaling Cascade","1.095","1","Cdk5 Cdkn5 Crk6","Cdk5","P49615","1.014","Mus musculus (Mouse)","10090","Cyclin-dependent-like kinase 5 (EC 2.7.11.1) (CR6 protein kinase) (CRK6) (Cell division protein kinase 5) (Serine/threonine-protein kinase PSSALRE) (Tau protein kinase II catalytic subunit) (TPKII catalytic subunit)","false","reviewed","1_5"
"8357","Mitochondrion","0.809","3","Mtatp8 Atp8 mt-Atp8","Mtatp8","P03930","1.019","Mus musculus (Mouse)","10090","ATP synthase protein 8 (A6L) (F-ATPase subunit 8)","false","reviewed","3_2"
"8358","Mitochondrion","0.926","3","Ndufa2","Ndufa2","Q9CQ75","1.246","Mus musculus (Mouse)","10090","NADH dehydrogenase [ubiquinone] 1 alpha subcomplex subunit 2 (Complex I-B8) (CI-B8) (NADH-ubiquinone oxidoreductase B8 subunit)","false","reviewed","3_1"
"8359","Signaling Cascade","0.937","1","Gnao1 Gna0 Gnao","Gnao1","P18872","1.022","Mus musculus (Mouse)","10090","Guanine nucleotide-binding protein G(o) subunit alpha","false","reviewed","1_3"
"8360","Cytoskeleton","1.162","1","Myh9","Myh9","Q8VDD5","1.086","Mus musculus (Mouse)","10090","Myosin-9 (Cellular myosin heavy chain, type A) (Myosin heavy chain 9) (Myosin heavy chain, non-muscle IIa) (Non-muscle myosin heavy chain A) (NMMHC-A) (Non-muscle myosin heavy chain IIa) (NMMHC II-a) (NMMHC-IIA)","false","reviewed","1_1"
"8361","Mitochondrion","1.106","5","Acadl","Acadl","P51174","1.231","Mus musculus (Mouse)","10090","Long-chain specific acyl-CoA dehydrogenase, mitochondrial (LCAD) (EC 1.3.8.8)","false","reviewed","5_5"
"8362","Mitochondrion","1.077","6","Afg3l2","Afg3l2","Q8JZQ2","1.191","Mus musculus (Mouse)","10090","AFG3-like protein 2 (EC 3.4.24.-)","false","reviewed","6_4"
"8363","Mitochondrion","1.051","5","Acad9","Acad9","Q8JZN5","1.124","Mus musculus (Mouse)","10090","Acyl-CoA dehydrogenase family member 9, mitochondrial (ACAD-9) (EC 1.3.99.-)","false","reviewed","5_1"
"8364","Signaling Cascade","0.96","1","Ppp5c","Ppp5c","Q60676","0.998","Mus musculus (Mouse)","10090","Serine/threonine-protein phosphatase 5 (PP5) (EC 3.1.3.16) (Protein phosphatase T) (PPT)","false","reviewed","1_1"
"8365","Mitochondrion","0.877","3","Ndufs4","Ndufs4","Q9CXZ1","1.106","Mus musculus (Mouse)","10090","NADH dehydrogenase [ubiquinone] iron-sulfur protein 4, mitochondrial (Complex I-18 kDa) (CI-18 kDa) (Complex I-AQDQ) (CI-AQDQ) (NADH-ubiquinone oxidoreductase 18 kDa subunit)","false","reviewed","3_1"
"8366","Mitochondrion","1.186","1","Rhot1 Arht1","Rhot1","Q8BG51","1.094","Mus musculus (Mouse)","10090","Mitochondrial Rho GTPase 1 (MIRO-1) (EC 3.6.5.-) (Ras homolog gene family member T1)","false","reviewed","1_6"
"8367","Plasma Membrane","0.965","1","Rac1","Rac1","P63001","0.951","Mus musculus (Mouse)","10090","Ras-related C3 botulinum toxin substrate 1 (p21-Rac1)","false","reviewed","1_6"
"8368","Plasma Membrane","1.074","2","Tfrc Trfr","Tfrc","Q62351","1.046","Mus musculus (Mouse)","10090","Transferrin receptor protein 1 (TR) (TfR) (TfR1) (Trfr) (CD antigen CD71)","false","reviewed","2_3"
"8369","Synaptic Vesicle","0.944","1","Vamp2 Syb2","Vamp2","P63044","0.853","Mus musculus (Mouse)","10090","Vesicle-associated membrane protein 2 (VAMP-2) (Synaptobrevin-2)","false","reviewed","1_3"
"8370","Cytoskeleton","0.985","1","Ina","Ina","P46660","0.845","Mus musculus (Mouse)","10090","Alpha-internexin (Alpha-Inx) (66 kDa neurofilament protein) (NF-66) (Neurofilament-66)","false","reviewed","1_4"
"8371","Cytoskeleton","1.029","1","Dync1h1 Dhc1 Dnch1 Dnchc1 Dyhc","Dync1h1","Q9JHU4","1.005","Mus musculus (Mouse)","10090","Cytoplasmic dynein 1 heavy chain 1 (Cytoplasmic dynein heavy chain 1) (Dynein heavy chain, cytosolic)","false","reviewed","1_7"
"8372","Mitochondrion","0.896","3","Uqcrb","Uqcrb","Q9D855","1.189","Mus musculus (Mouse)","10090","Cytochrome b-c1 complex subunit 7 (Complex III subunit 7) (Complex III subunit VII) (Ubiquinol-cytochrome c reductase complex 14 kDa protein)","false","reviewed","3_2"
"8373","Mitochondrion","0.881","3","Ndufs8","Ndufs8","Q8K3J1","1.156","Mus musculus (Mouse)","10090","NADH dehydrogenase [ubiquinone] iron-sulfur protein 8, mitochondrial (EC 1.6.5.3) (EC 1.6.99.3) (Complex I-23kD) (CI-23kD) (NADH-ubiquinone oxidoreductase 23 kDa subunit)","false","reviewed","3_1"
"8374","Mitochondrion","1.065","3","Uqcrc2","Uqcrc2","Q9DB77","1.128","Mus musculus (Mouse)","10090","Cytochrome b-c1 complex subunit 2, mitochondrial (Complex III subunit 2) (Core protein II) (Ubiquinol-cytochrome-c reductase complex core protein 2)","false","reviewed","3_2"
"8375","Mitochondrion","1.172","2","Ppa2","Ppa2","Q91VM9","1.137","Mus musculus (Mouse)","10090","Inorganic pyrophosphatase 2, mitochondrial (EC 3.6.1.1) (Pyrophosphate phospho-hydrolase 2) (PPase 2)","false","reviewed","2_4"
"8376","Mitochondrion","1.101","3","Ndufa9","Ndufa9","Q9DC69","1.17","Mus musculus (Mouse)","10090","NADH dehydrogenase [ubiquinone] 1 alpha subcomplex subunit 9, mitochondrial (Complex I-39kD) (CI-39kD) (NADH-ubiquinone oxidoreductase 39 kDa subunit)","false","reviewed","3_3"
"8377","Cytoskeleton","0.915","1","Pfn2","Pfn2","Q9JJV2","0.913","Mus musculus (Mouse)","10090","Profilin-2 (Profilin II)","false","reviewed","1_4"
"8378","Mitochondrion","0.932","3","Atp5f1","Atp5f1","Q9CQQ7","1.132","Mus musculus (Mouse)","10090","ATP synthase F(0) complex subunit B1, mitochondrial (ATP synthase subunit b) (ATPase subunit b)","false","reviewed","3_2"
"8379","Mitochondrion","1.077","3","Clpp","Clpp","O88696","1.199","Mus musculus (Mouse)","10090","ATP-dependent Clp protease proteolytic subunit, mitochondrial (EC 3.4.21.92) (Endopeptidase Clp)","false","reviewed","3_3"
"8380","Signaling Cascade","1.044","3","Phb2 Bap Bcap37 Rea","Phb2","O35129","1.143","Mus musculus (Mouse)","10090","Prohibitin-2 (B-cell receptor-associated protein BAP37) (Repressor of estrogen receptor activity)","false","reviewed","3_3"
"8381","Mitochondrion","1.062","5","Aldh1b1 Aldhx","Aldh1b1","Q9CZS1","1.166","Mus musculus (Mouse)","10090","Aldehyde dehydrogenase X, mitochondrial (EC 1.2.1.3) (Aldehyde dehydrogenase family 1 member B1)","false","reviewed","5_2"
"8382","Plasma Membrane","0.937","1","Chl1 Call","Chl1","P70232","1.103","Mus musculus (Mouse)","10090","Neural cell adhesion molecule L1-like protein (Cell adhesion molecule with homology to L1CAM) (Chl1-like protein) (Close homolog of L1) [Cleaved into: Processed neural cell adhesion molecule L1-like protein]","false","reviewed","1_5"
"8383","Plasma Membrane","1.012","1","Ptpra Lrp Ptpa","Ptpra","P18052","1.072","Mus musculus (Mouse)","10090","Receptor-type tyrosine-protein phosphatase alpha (Protein-tyrosine phosphatase alpha) (R-PTP-alpha) (EC 3.1.3.48) (LCA-related phosphatase) (PTPTY-28)","false","reviewed","1_5"
"8384","Mitochondrion","0.98","3","Mp68","Mp68","P56379","1.029","Mus musculus (Mouse)","10090","6.8 kDa mitochondrial proteolipid","false","reviewed","3_3"
"8385","Mitochondrion","0.978","3","Mpc2 Brp44","Mpc2","Q9D023","1.101","Mus musculus (Mouse)","10090","Mitochondrial pyruvate carrier 2 (Brain protein 44)","false","reviewed","3_1"
"8386","Signaling Cascade","1.007","1","Prkar2a","Prkar2a","P12367","0.998","Mus musculus (Mouse)","10090","cAMP-dependent protein kinase type II-alpha regulatory subunit","false","reviewed","1_1"
"8387","Synaptic Vesicle","1.026","2","Snap91","Snap91","Q61548","0.936","Mus musculus (Mouse)","10090","Clathrin coat assembly protein AP180 (91 kDa synaptosomal-associated protein) (Clathrin coat-associated protein AP180) (Phosphoprotein F1-20)","false","reviewed","2_3"
"8388","Signaling Cascade","0.856","2","Fkbp2 Fkbp13","Fkbp2","P45878","0.92","Mus musculus (Mouse)","10090","Peptidyl-prolyl cis-trans isomerase FKBP2 (PPIase FKBP2) (EC 5.2.1.8) (13 kDa FK506-binding protein) (13 kDa FKBP) (FKBP-13) (FK506-binding protein 2) (FKBP-2) (Immunophilin FKBP13) (Rotamase)","false","reviewed","2_4"
"8389","Signaling Cascade","0.999","6","Hspa8 Hsc70 Hsc73","Hspa8","P63017","1.005","Mus musculus (Mouse)","10090","Heat shock cognate 71 kDa protein (Heat shock 70 kDa protein 8)","false","reviewed","6_2"
"8390","Cytoskeleton","0.967","1","Arpc5l","Arpc5l","Q9D898","0.944","Mus musculus (Mouse)","10090","Actin-related protein 2/3 complex subunit 5-like protein (Arp2/3 complex 16 kDa subunit 2) (ARC16-2)","false","reviewed","1_8"
"8391","Plasma Membrane","0.932","1","Gabbr2 Gm425 Gpr51","Gabbr2","Q80T41","0.999","Mus musculus (Mouse)","10090","Gamma-aminobutyric acid type B receptor subunit 2 (GABA-B receptor 2) (GABA-B-R2) (GABA-BR2) (GABABR2) (Gb2) (G-protein coupled receptor 51)","false","reviewed","1_2"
"8392","Plasma Membrane","0.942","1","Atp2b2 Pmca2","Atp2b2","Q9R0K7","1.025","Mus musculus (Mouse)","10090","Plasma membrane calcium-transporting ATPase 2 (PMCA2) (EC 3.6.3.8) (Plasma membrane calcium ATPase isoform 2) (Plasma membrane calcium pump isoform 2)","false","reviewed","1_2"
"8393","Cytoplasm","1.051","4","Gpd1 Gdc-1 Gdc1 Kiaa4010","Gpd1","P13707","0.942","Mus musculus (Mouse)","10090","Glycerol-3-phosphate dehydrogenase [NAD(+)], cytoplasmic (GPD-C) (GPDH-C) (EC 1.1.1.8)","false","reviewed","4_4"
"8394","Mitochondrion","1.049","4","Gpd2 Gdm1","Gpd2","Q64521","1.164","Mus musculus (Mouse)","10090","Glycerol-3-phosphate dehydrogenase, mitochondrial (GPD-M) (GPDH-M) (EC 1.1.5.3) (Protein TISP38)","false","reviewed","4_4"
"8395","Cytoplasm","1.003","3","Glrx Glrx1 Grx Grx1","Glrx","Q9QUH0","0.865","Mus musculus (Mouse)","10090","Glutaredoxin-1 (Thioltransferase-1) (TTase-1)","false","reviewed","3_3"
"8396","Mitochondrion","1.091","3","Prdx3 Aop1 Mer5","Prdx3","P20108","1.118","Mus musculus (Mouse)","10090","Thioredoxin-dependent peroxide reductase, mitochondrial (EC 1.11.1.15) (Antioxidant protein 1) (AOP-1) (PRX III) (Perioredoxin-3) (Protein MER5)","false","reviewed","3_3"
"8397","Signaling Cascade","0.931","2","Dclk1 Dcamkl1 Dclk","Dclk1","Q9JLM8","1.057","Mus musculus (Mouse)","10090","Serine/threonine-protein kinase DCLK1 (EC 2.7.11.1) (Doublecortin-like and CAM kinase-like 1) (Doublecortin-like kinase 1)","false","reviewed","2_1"
"8398","Signaling Cascade","0.996","1","Crk Crko","Crk","Q64010","0.986","Mus musculus (Mouse)","10090","Adapter molecule crk (Proto-oncogene c-Crk) (p38)","false","reviewed","1_4"
"8399","Mitochondrion","0.486","3","Atp5j","Atp5j","P97450","1.227","Mus musculus (Mouse)","10090","ATP synthase-coupling factor 6, mitochondrial (ATPase subunit F6)","false","reviewed","3_2"
"8400","Synaptic Vesicle","1.004","1","Syn1 Syn-1","Syn1","O88935","0.946","Mus musculus (Mouse)","10090","Synapsin-1 (Synapsin I)","false","reviewed","1_4"
"8401","Synaptic Vesicle","0.993","1","Rab3c","Rab3c","P62823","1.027","Mus musculus (Mouse)","10090","Ras-related protein Rab-3C","false","reviewed","1_2"
"8402","Signaling Cascade","1.008","1","Arhgdia C87222 Gdi1","Arhgdia","Q99PT1","0.875","Mus musculus (Mouse)","10090","Rho GDP-dissociation inhibitor 1 (Rho GDI 1) (GDI-1) (Rho-GDI alpha)","false","reviewed","1_6"
"8403","Mitochondrion","1.066","5","Pccb","Pccb","Q99MN9","1.185","Mus musculus (Mouse)","10090","Propionyl-CoA carboxylase beta chain, mitochondrial (PCCase subunit beta) (EC 6.4.1.3) (Propanoyl-CoA:carbon dioxide ligase subunit beta)","false","reviewed","5_3"
"8404","Cytoskeleton","1.031","1","Actr3 Arp3","Actr3","Q99JY9","0.954","Mus musculus (Mouse)","10090","Actin-related protein 3 (Actin-like protein 3)","false","reviewed","1_8"
"8405","Plasma Membrane","0.917","1","Atp1b1 Atp4b","Atp1b1","P14094","0.971","Mus musculus (Mouse)","10090","Sodium/potassium-transporting ATPase subunit beta-1 (Sodium/potassium-dependent ATPase subunit beta-1)","false","reviewed","1_8"
"8406","Cytoskeleton","1.048","1","Capza2 Cappa2","Capza2","P47754","1.025","Mus musculus (Mouse)","10090","F-actin-capping protein subunit alpha-2 (CapZ alpha-2)","false","reviewed","1_5"
"8407","Synaptic Vesicle","0.99","1","Rab3b","Rab3b","Q9CZT8","1.058","Mus musculus (Mouse)","10090","Tas-related protein Rab-3B","false","reviewed","1_2"
"8408","Mitochondrion","1.122","4","Pdha1 Pdha-1","Pdha1","P35486","1.202","Mus musculus (Mouse)","10090","Pyruvate dehydrogenase E1 component subunit alpha, somatic form, mitochondrial (EC 1.2.4.1) (PDHE1-A type I)","false","reviewed","4_1"
"8409","Mitochondrion","1.061","6","Fech","Fech","P22315","1.085","Mus musculus (Mouse)","10090","Ferrochelatase, mitochondrial (EC 4.99.1.1) (Heme synthase) (Protoheme ferro-lyase)","false","reviewed","6_1"
"8410","Mitochondrion","1.043","6","Abcb7 Abc7","Abcb7","Q61102","0.992","Mus musculus (Mouse)","10090","ATP-binding cassette sub-family B member 7, mitochondrial (ATP-binding cassette transporter 7) (ABC transporter 7 protein)","false","reviewed","6_1"
"8411","Cytoskeleton","0.956","1","Pfn1","Pfn1","P62962","0.945","Mus musculus (Mouse)","10090","Profilin-1 (Profilin I)","false","reviewed","1_8"
"8412","Signaling Cascade","1.035","1","Prkce Pkce Pkcea","Prkce","P16054","1.03","Mus musculus (Mouse)","10090","Protein kinase C epsilon type (EC 2.7.11.13) (nPKC-epsilon)","false","reviewed","1_5"
"8413","Mitochondrion","1.161","3","Sod2 Sod-2","Sod2","P09671","1.232","Mus musculus (Mouse)","10090","Superoxide dismutase [Mn], mitochondrial (EC 1.15.1.1)","false","reviewed","3_3"
"8414","Plasma Membrane","0.927","1","Bsg","Bsg","P18572","0.949","Mus musculus (Mouse)","10090","Basigin (Basic immunoglobulin superfamily) (HT7 antigen) (Membrane glycoprotein gp42) (CD antigen CD147)","false","reviewed","1_7"
"8415","Mitochondrion","1.048","1","Fkbp8 Fkbp38 Sam11","Fkbp8","O35465","1.045","Mus musculus (Mouse)","10090","Peptidyl-prolyl cis-trans isomerase FKBP8 (PPIase FKBP8) (EC 5.2.1.8) (38 kDa FK506-binding protein) (38 kDa FKBP) (FKBP-38) (mFKBP38) (FK506-binding protein 8) (FKBP-8) (FKBPR38) (Rotamase)","false","reviewed","1_7"
"8416","Synaptic Vesicle","1.015","2","Dmxl2 Kiaa0856","Dmxl2","Q8BPN8","1.013","Mus musculus (Mouse)","10090","DmX-like protein 2 (Rabconnectin-3)","false","reviewed","2_1"
"8417","Synaptic Vesicle","1.104","2","Atp6v0c Atp6c Atp6l Atpl Mvp","Atp6v0c","P63082","0.683","Mus musculus (Mouse)","10090","V-type proton ATPase 16 kDa proteolipid subunit (V-ATPase 16 kDa proteolipid subunit) (PL16) (Vacuolar proton pump 16 kDa proteolipid subunit)","false","reviewed","2_4"
"8418","Mitochondrion","0.706","2","Fis1 Ttc11","Fis1","Q9CQ92","0.974","Mus musculus (Mouse)","10090","Mitochondrial fission 1 protein (FIS1 homolog) (Tetratricopeptide repeat protein 11) (TPR repeat protein 11)","false","reviewed","2_2"
"8419","Synaptic Vesicle","1.034","4","Dnm1l Drp1","Dnm1l","Q8K1M6","0.954","Mus musculus (Mouse)","10090","Dynamin-1-like protein (EC 3.6.5.5) (Dynamin family member proline-rich carboxyl-terminal domain less) (Dymple) (Dynamin-related protein 1)","false","reviewed","4_3"
"8420","Mitochondrion","1.137","5","Acadsb","Acadsb","Q9DBL1","1.067","Mus musculus (Mouse)","10090","Short/branched chain specific acyl-CoA dehydrogenase, mitochondrial (SBCAD) (EC 1.3.8.5) (2-methyl branched chain acyl-CoA dehydrogenase) (2-MEBCAD) (2-methylbutyryl-coenzyme A dehydrogenase) (2-methylbutyryl-CoA dehydrogenase)","false","reviewed","5_1"
"8421","Mitochondrion","1.095","4","Dbt","Dbt","P53395","1.181","Mus musculus (Mouse)","10090","Lipoamide acyltransferase component of branched-chain alpha-keto acid dehydrogenase complex, mitochondrial (EC 2.3.1.168) (Branched-chain alpha-keto acid dehydrogenase complex component E2) (BCKAD-E2) (BCKADE2) (Dihydrolipoamide acetyltransferase component of branched-chain alpha-keto acid dehydrogenase complex) (Dihydrolipoamide branched chain transacylase) (Dihydrolipoyllysine-residue (2-methylpropanoyl)transferase)","false","reviewed","4_1"
"8422","Mitochondrion","1.065","5","Ivd","Ivd","Q9JHI5","1.423","Mus musculus (Mouse)","10090","Isovaleryl-CoA dehydrogenase, mitochondrial (IVD) (EC 1.3.8.4)","false","reviewed","5_3"
"8423","Cytoplasm","1.054","4","Taldo1 Tal Taldo","Taldo1","Q93092","0.866","Mus musculus (Mouse)","10090","Transaldolase (EC 2.2.1.2)","false","reviewed","4_2"
"8424","Synaptic Vesicle","0.997","4","Pkm Pk3 Pkm2 Pykm","Pkm","P52480","0.928","Mus musculus (Mouse)","10090","Pyruvate kinase PKM (EC 2.7.1.40) (Pyruvate kinase muscle isozyme)","false","reviewed","4_2"
"8425","Plasma Membrane","1.008","1","Napa Snapa","Napa","Q9DB05","0.905","Mus musculus (Mouse)","10090","Alpha-soluble NSF attachment protein (SNAP-alpha) (N-ethylmaleimide-sensitive factor attachment protein alpha)","false","reviewed","1_3"
"8426","Cytoskeleton","1.043","1","Ctnna2 Catna2","Ctnna2","Q61301","0.993","Mus musculus (Mouse)","10090","Catenin alpha-2 (Alpha N-catenin)","false","reviewed","1_5"
"8427","Mitochondrion","1.08","4","Sucla2","Sucla2","Q9Z2I9","1.159","Mus musculus (Mouse)","10090","Succinyl-CoA ligase [ADP-forming] subunit beta, mitochondrial (EC 6.2.1.5) (ATP-specific succinyl-CoA synthetase subunit beta) (Succinyl-CoA synthetase beta-A chain) (SCS-betaA)","false","reviewed","4_1"
"8428","Mitochondrion","1.064","5","Acadvl Vlcad","Acadvl","P50544","1.227","Mus musculus (Mouse)","10090","Very long-chain specific acyl-CoA dehydrogenase, mitochondrial (EC 1.3.8.9) (MVLCAD) (VLCAD)","false","reviewed","5_5"
"8429","Signaling Cascade","1.041","1","Mapk10 Jnk3 Prkm10 Serk2","Mapk10","Q61831","1.015","Mus musculus (Mouse)","10090","Mitogen-activated protein kinase 10 (MAP kinase 10) (MAPK 10) (EC 2.7.11.24) (MAP kinase p49 3F12) (Stress-activated protein kinase JNK3) (c-Jun N-terminal kinase 3)","false","reviewed","1_1"
"8430","Synaptic Vesicle","0.876","1","Cplx1","Cplx1","P63040","0.911","Mus musculus (Mouse)","10090","Complexin-1 (921-S) (Complexin I) (CPX I) (Synaphin-2)","false","reviewed","1_3"
"8431","Signaling Cascade","0.943","1","Camk2g","Camk2g","Q923T9","1.071","Mus musculus (Mouse)","10090","Calcium/calmodulin-dependent protein kinase type II subunit gamma (CaM kinase II subunit gamma) (CaMK-II subunit gamma) (EC 2.7.11.17)","false","reviewed","1_1"
"8432","Signaling Cascade","1.047","2","Wdr7 Kiaa0541 Trag","Wdr7","Q920I9","1.016","Mus musculus (Mouse)","10090","WD repeat-containing protein 7 (TGF-beta resistance-associated protein TRAG)","false","reviewed","2_1"
"8433","Synaptic Vesicle","1.035","4","Gpi Gpi1","Gpi","P06745","0.923","Mus musculus (Mouse)","10090","Glucose-6-phosphate isomerase (GPI) (EC 5.3.1.9) (Autocrine motility factor) (AMF) (Neuroleukin) (NLK) (Phosphoglucose isomerase) (PGI) (Phosphohexose isomerase) (PHI)","false","reviewed","4_2"
"8434","Signaling Cascade","1.099","2","Sorbs2 Argbp2 Kiaa0777","Sorbs2","Q3UTJ2","0.967","Mus musculus (Mouse)","10090","Sorbin and SH3 domain-containing protein 2 (Arg/Abl-interacting protein 2) (ArgBP2)","false","reviewed","2_7"
"8435","Cytoskeleton","1.147","2","Actn1","Actn1","Q7TPR4","0.952","Mus musculus (Mouse)","10090","Alpha-actinin-1 (Alpha-actinin cytoskeletal isoform) (F-actin cross-linking protein) (Non-muscle alpha-actinin-1)","false","reviewed","2_7"
"8436","Plasma Membrane","0.865","1","Stx1b Stx1b1 Stx1b2","Stx1b","P61264","0.987","Mus musculus (Mouse)","10090","Syntaxin-1B","false","reviewed","1_3"
"8437","Signaling Cascade","0.909","1","Slc9a3r1 Nherf Nherf1","Slc9a3r1","P70441","0.834","Mus musculus (Mouse)","10090","Na(+)/H(+) exchange regulatory cofactor NHE-RF1 (NHERF-1) (Ezrin-radixin-moesin-binding phosphoprotein 50) (EBP50) (Regulatory cofactor of Na(+)/H(+) exchanger) (Sodium-hydrogen exchanger regulatory factor 1) (Solute carrier family 9 isoform A3 regulatory factor 1)","false","reviewed","1_6"
"8438","Cytoskeleton","0.937","1","Ezr Vil2","Ezr","P26040","0.95","Mus musculus (Mouse)","10090","Ezrin (Cytovillin) (Villin-2) (p81)","false","reviewed","1_6"
"8439","Signaling Cascade","1.044","2","Sacm1l Kiaa0851 Sac1","Sacm1l","Q9EP69","1.049","Mus musculus (Mouse)","10090","Phosphatidylinositide phosphatase SAC1 (EC 3.1.3.-) (Suppressor of actin mutations 1-like protein)","false","reviewed","2_2"
"8440","Synaptic Vesicle","0.989","2","Sh3gl2 Sh3d2a","Sh3gl2","Q62420","0.903","Mus musculus (Mouse)","10090","Endophilin-A1 (Endophilin-1) (SH3 domain protein 2A) (SH3 domain-containing GRB2-like protein 2) (SH3p4)","false","reviewed","2_2"
"8441","Mitochondrion","1.022","3","Cox6a1 Cox6al","Cox6a1","P43024","1.13","Mus musculus (Mouse)","10090","Cytochrome c oxidase subunit 6A1, mitochondrial (Cytochrome c oxidase polypeptide VIa-liver)","false","reviewed","3_2"
"8442","Cytoskeleton","1.001","1","Map1b Mtap1b Mtap5","Map1b","P14873","1.02","Mus musculus (Mouse)","10090","Microtubule-associated protein 1B (MAP-1B) (MAP1(X)) (MAP1.2) [Cleaved into: MAP1B heavy chain; MAP1 light chain LC1]","false","reviewed","1_7"
"8443","Signaling Cascade","1.074","1","P4hb Pdia1","P4hb","P09103","1.037","Mus musculus (Mouse)","10090","Protein disulfide-isomerase (PDI) (EC 5.3.4.1) (Cellular thyroid hormone-binding protein) (Endoplasmic reticulum resident protein 59) (ER protein 59) (ERp59) (Prolyl 4-hydroxylase subunit beta) (p55)","false","reviewed","1_2"
"8444","Mitochondrion","0.825","3","Atp5e","Atp5e","P56382","1.217","Mus musculus (Mouse)","10090","ATP synthase subunit epsilon, mitochondrial (ATPase subunit epsilon)","false","reviewed","3_2"
"8445","Mitochondrion","1.01","2","Mcu Ccdc109a","Mcu","Q3UMR5","1.166","Mus musculus (Mouse)","10090","Calcium uniporter protein, mitochondrial (Coiled-coil domain-containing protein 109A)","false","reviewed","2_1"
"8446","Mitochondrion","1.115","5","Pcca","Pcca","Q91ZA3","1.155","Mus musculus (Mouse)","10090","Propionyl-CoA carboxylase alpha chain, mitochondrial (PCCase subunit alpha) (EC 6.4.1.3) (Propanoyl-CoA:carbon dioxide ligase subunit alpha)","false","reviewed","5_3"
"8447","Cytoskeleton","1.025","1","Myh10","Myh10","Q61879","1.033","Mus musculus (Mouse)","10090","Myosin-10 (Cellular myosin heavy chain, type B) (Myosin heavy chain 10) (Myosin heavy chain, non-muscle IIb) (Non-muscle myosin heavy chain B) (NMMHC-B) (Non-muscle myosin heavy chain IIb) (NMMHC II-b) (NMMHC-IIB)","false","reviewed","1_1"
"8448","Signaling Cascade","0.813","1","Ywhaz","Ywhaz","P63101","0.804","Mus musculus (Mouse)","10090","14-3-3 protein zeta/delta (Protein kinase C inhibitor protein 1) (KCIP-1) (SEZ-2)","false","reviewed","1_4"
"8449","Signaling Cascade","0.929","1","Srcin1 Kiaa1684 P140","Srcin1","Q9QWI6","1.062","Mus musculus (Mouse)","10090","SRC kinase signaling inhibitor 1 (SNAP-25-interacting protein) (SNIP) (p130Cas-associated protein) (p140Cap)","false","reviewed","1_4"
"8450","Cytoskeleton","0.952","1","Mapre2","Mapre2","Q8R001","1.068","Mus musculus (Mouse)","10090","Microtubule-associated protein RP/EB family member 2 (APC-binding protein EB2) (End-binding protein 2) (EB2)","false","reviewed","1_4"
"8451","Signaling Cascade","1.112","5","Aldh7a1 Ald7a1","Aldh7a1","Q9DBF1","1.149","Mus musculus (Mouse)","10090","Alpha-aminoadipic semialdehyde dehydrogenase (Alpha-AASA dehydrogenase) (EC 1.2.1.31) (Aldehyde dehydrogenase family 7 member A1) (EC 1.2.1.3) (Antiquitin-1) (Betaine aldehyde dehydrogenase) (EC 1.2.1.8) (Delta1-piperideine-6-carboxylate dehydrogenase) (P6c dehydrogenase)","false","reviewed","5_2"
"8452","Mitochondrion","1.075","4","Gk Gyk","Gk","Q64516","1.163","Mus musculus (Mouse)","10090","Glycerol kinase (GK) (Glycerokinase) (EC 2.7.1.30) (ATP:glycerol 3-phosphotransferase)","false","reviewed","4_4"
"8453","Plasma Membrane","0.914","1","Atp1a1","Atp1a1","Q8VDN2","0.974","Mus musculus (Mouse)","10090","Sodium/potassium-transporting ATPase subunit alpha-1 (Na(+)/K(+) ATPase alpha-1 subunit) (EC 3.6.3.9) (Sodium pump subunit alpha-1)","false","reviewed","1_3"
"8454","Mitochondrion","1.086","2","Mff","Mff","Q6PCP5","1.184","Mus musculus (Mouse)","10090","Mitochondrial fission factor","false","reviewed","2_2"
"8455","Cytoplasm","0.977","2","Pcmt1","Pcmt1","P23506","0.909","Mus musculus (Mouse)","10090","Protein-L-isoaspartate(D-aspartate) O-methyltransferase (PIMT) (EC 2.1.1.77) (L-isoaspartyl protein carboxyl methyltransferase) (Protein L-isoaspartyl/D-aspartyl methyltransferase) (Protein-beta-aspartate methyltransferase)","false","reviewed","2_4"
"8456","Mitochondrion","0.942","3","Ndufb8","Ndufb8","Q9D6J5","1.067","Mus musculus (Mouse)","10090","NADH dehydrogenase [ubiquinone] 1 beta subcomplex subunit 8, mitochondrial (Complex I-ASHI) (CI-ASHI) (NADH-ubiquinone oxidoreductase ASHI subunit)","false","reviewed","3_1"
"8457","Synaptic Vesicle","0.903","4","G6pdx G6pd G6pd-1","G6pdx","Q00612","0.943","Mus musculus (Mouse)","10090","Glucose-6-phosphate 1-dehydrogenase X (G6PD) (EC 1.1.1.49)","false","reviewed","4_2"
"8458","Synaptic Vesicle","0.945","2","Atp6v1g2 Atp6g2 Ng38","Atp6v1g2","Q9WTT4","0.919","Mus musculus (Mouse)","10090","V-type proton ATPase subunit G 2 (V-ATPase subunit G 2) (V-ATPase 13 kDa subunit 2) (Vacuolar proton pump subunit G 2)","false","reviewed","2_4"
"8459","Signaling Cascade","1.055","1","Arhgap1","Arhgap1","Q5FWK3","0.966","Mus musculus (Mouse)","10090","Rho GTPase-activating protein 1 (Rho-type GTPase-activating protein 1)","false","reviewed","1_6"
"8460","Cytoplasm","1.329","2","Epn2","Epn2","Q8CHU3","0.89","Mus musculus (Mouse)","10090","Epsin-2 (EPS-15-interacting protein 2) (Intersectin-EH-binding protein 2) (Ibp2)","false","reviewed","2_3"
"8461","Cytoskeleton","0.879","1","Arpc4 Arc20","Arpc4","P59999","0.871","Mus musculus (Mouse)","10090","Actin-related protein 2/3 complex subunit 4 (Arp2/3 complex 20 kDa subunit) (p20-ARC)","false","reviewed","1_8"
"8462","Cytoskeleton","1.009","1","Arpc2","Arpc2","Q9CVB6","0.925","Mus musculus (Mouse)","10090","Actin-related protein 2/3 complex subunit 2 (Arp2/3 complex 34 kDa subunit) (p34-ARC)","false","reviewed","1_8"
"8463","Mitochondrion","0.982","3","Ndufb4","Ndufb4","Q9CQC7","1.049","Mus musculus (Mouse)","10090","NADH dehydrogenase [ubiquinone] 1 beta subcomplex subunit 4 (Complex I-B15) (CI-B15) (NADH-ubiquinone oxidoreductase B15 subunit)","false","reviewed","3_1"
"8464","Cytoskeleton","0.924","1","Bsn Kiaa0434","Bsn","O88737","1.057","Mus musculus (Mouse)","10090","Protein bassoon","false","reviewed","1_12"
"8465","Plasma Membrane","0.859","1","Erc2 Cast1 D14Ertd171e Kiaa0378","Erc2","Q6PH08","1.053","Mus musculus (Mouse)","10090","ERC protein 2 (CAZ-associated structural protein 1) (CAST1)","false","reviewed","1_12"
"8466","Synaptic Vesicle","1.066","2","Dnm1 Dnm Kiaa4093","Dnm1","P39053","0.98","Mus musculus (Mouse)","10090","Dynamin-1 (EC 3.6.5.5)","false","reviewed","2_2"
"8467","Mitochondrion","1.112","6","Lrpprc Lrp130","Lrpprc","Q6PB66","1.158","Mus musculus (Mouse)","10090","Leucine-rich PPR motif-containing protein, mitochondrial (130 kDa leucine-rich protein) (LRP 130) (mLRP130)","false","reviewed","6_1"
"8468","Signaling Cascade","1.01","1","Prkar2b","Prkar2b","P31324","0.915","Mus musculus (Mouse)","10090","cAMP-dependent protein kinase type II-beta regulatory subunit","false","reviewed","1_1"
"8469","Plasma Membrane","0.995","1","Palm2","Palm2","Q8BR92","1.021","Mus musculus (Mouse)","10090","Paralemmin-2","false","reviewed","1_1"
"8470","Plasma Membrane","0.972","1","Grm1 Gprc1a Mglur1","Grm1","P97772","1.026","Mus musculus (Mouse)","10090","Metabotropic glutamate receptor 1 (mGluR1)","false","reviewed","1_1"
"8471","Mitochondrion","1.146","5","Aldh4a1","Aldh4a1","Q8CHT0","1.096","Mus musculus (Mouse)","10090","Delta-1-pyrroline-5-carboxylate dehydrogenase, mitochondrial (P5C dehydrogenase) (EC 1.2.1.88) (Aldehyde dehydrogenase family 4 member A1) (L-glutamate gamma-semialdehyde dehydrogenase)","false","reviewed","5_2"
"8472","Mitochondrion","1.147","5","Oat","Oat","P29758","1.004","Mus musculus (Mouse)","10090","Ornithine aminotransferase, mitochondrial (EC 2.6.1.13) (Ornithine--oxo-acid aminotransferase)","false","reviewed","5_2"
"8473","Signaling Cascade","0.895","6","St13 Fam10a1 Hip","St13","Q99L47","0.827","Mus musculus (Mouse)","10090","Hsc70-interacting protein (Hip) (Protein FAM10A1) (Protein ST13 homolog)","false","reviewed","6_1"
"8474","Synaptic Vesicle","0.981","2","Amph Amph1","Amph","Q7TQF7","0.929","Mus musculus (Mouse)","10090","Amphiphysin","false","reviewed","2_2"
"8475","Plasma Membrane","0.879","1","Cdh2","Cdh2","P15116","1.051","Mus musculus (Mouse)","10090","Cadherin-2 (Neural cadherin) (N-cadherin) (CD antigen CD325)","false","reviewed","1_5"
"8476","Plasma Membrane","0.79","1","Gap43 Basp2","Gap43","P06837","0.72","Mus musculus (Mouse)","10090","Neuromodulin (Axonal membrane protein GAP-43) (Calmodulin-binding protein P-57) (Growth-associated protein 43)","false","reviewed","1_1"
"8477","Signaling Cascade","1.047","6","Hsp90aa1 Hsp86 Hsp86-1 Hspca","Hsp90aa1","P07901","0.949","Mus musculus (Mouse)","10090","Heat shock protein HSP 90-alpha (Heat shock 86 kDa) (HSP 86) (HSP86) (Tumor-specific transplantation 86 kDa antigen) (TSTA)","false","reviewed","6_2"
"8478","Signaling Cascade","0.867","1","Ywhag","Ywhag","P61982","0.845","Mus musculus (Mouse)","10090","14-3-3 protein gamma [Cleaved into: 14-3-3 protein gamma, N-terminally processed]","false","reviewed","1_4"
"8479","Cytoplasm","0.974","4","Pfkp Pfkc","Pfkp","Q9WUA3","1.016","Mus musculus (Mouse)","10090","ATP-dependent 6-phosphofructokinase, platelet type (ATP-PFK) (PFK-P) (EC 2.7.1.11) (6-phosphofructokinase type C) (Phosphofructo-1-kinase isozyme C) (PFK-C) (Phosphohexokinase)","false","reviewed","4_2"
"8480","Mitochondrion","1.07","4","Ogdh Kiaa4192","Ogdh","Q60597","1.223","Mus musculus (Mouse)","10090","2-oxoglutarate dehydrogenase, mitochondrial (EC 1.2.4.2) (2-oxoglutarate dehydrogenase complex component E1) (OGDC-E1) (Alpha-ketoglutarate dehydrogenase)","false","reviewed","4_1"
"8481","Synaptic Vesicle","1.069","4","Aldoc Aldo3 Scrg2","Aldoc","P05063","1.068","Mus musculus (Mouse)","10090","Fructose-bisphosphate aldolase C (EC 4.1.2.13) (Aldolase 3) (Brain-type aldolase) (Scrapie-responsive protein 2) (Zebrin II)","false","reviewed","4_2"
"8482","Mitochondrion","1.047","4","Pdhx","Pdhx","Q8BKZ9","1.165","Mus musculus (Mouse)","10090","Pyruvate dehydrogenase protein X component, mitochondrial (Dihydrolipoamide dehydrogenase-binding protein of pyruvate dehydrogenase complex) (Lipoyl-containing pyruvate dehydrogenase complex component X)","false","reviewed","4_1"
"8483","Cytoskeleton","0.905","1","Arpc5","Arpc5","Q9CPW4","0.861","Mus musculus (Mouse)","10090","Actin-related protein 2/3 complex subunit 5 (Arp2/3 complex 16 kDa subunit) (p16-ARC)","false","reviewed","1_8"
"8484","Synaptic Vesicle","1.026","4","Eno1 Eno-1","Eno1","P17182","0.973","Mus musculus (Mouse)","10090","Alpha-enolase (EC 4.2.1.11) (2-phospho-D-glycerate hydro-lyase) (Enolase 1) (Non-neural enolase) (NNE)","false","reviewed","4_2"
"8485","Mitochondrion","1.047","5","Hadha","Hadha","Q8BMS1","1.261","Mus musculus (Mouse)","10090","Trifunctional enzyme subunit alpha, mitochondrial (TP-alpha) [Includes: Long-chain enoyl-CoA hydratase (EC 4.2.1.17); Long chain 3-hydroxyacyl-CoA dehydrogenase (EC 1.1.1.211)]","false","reviewed","5_1"
"8486","Signaling Cascade","1.047","1","Rasal1 Rasal","Rasal1","Q9Z268","0.981","Mus musculus (Mouse)","10090","RasGAP-activating-like protein 1","false","reviewed","1_2"
"8487","Mitochondrion","1.006","5","Cpt1c","Cpt1c","Q8BGD5","1.042","Mus musculus (Mouse)","10090","Carnitine O-palmitoyltransferase 1, brain isoform (CPT1-B) (EC 2.3.1.21) (CPT IC) (Carnitine O-palmitoyltransferase I, brain isoform) (CPTI-B) (Carnitine palmitoyltransferase 1C)","false","reviewed","5_5"
"8488","Mitochondrion","1.1","5","Eci1 Dci","Eci1","P42125","1.22","Mus musculus (Mouse)","10090","Enoyl-CoA delta isomerase 1, mitochondrial (EC 5.3.3.8) (3,2-trans-enoyl-CoA isomerase) (Delta(3),Delta(2)-enoyl-CoA isomerase) (D3,D2-enoyl-CoA isomerase) (Dodecenoyl-CoA isomerase)","false","reviewed","5_1"
"8489","Plasma Membrane","1.009","2","Cacna1e Cach6 Cacnl1a6 Cchra1","Cacna1e","Q61290","1.051","Mus musculus (Mouse)","10090","Voltage-dependent R-type calcium channel subunit alpha-1E (Brain calcium channel II) (BII) (Calcium channel, L type, alpha-1 polypeptide, isoform 6) (Voltage-gated calcium channel subunit alpha Cav2.3)","false","reviewed","2_1"
"8490","Plasma Membrane","0.953","2","Cacnb4 Cacnlb4","Cacnb4","Q8R0S4","1.019","Mus musculus (Mouse)","10090","Voltage-dependent L-type calcium channel subunit beta-4 (CAB4) (Calcium channel voltage-dependent subunit beta 4)","false","reviewed","2_1"
"8491","Plasma Membrane","1.055","1","Apoe","Apoe","P08226","0.943","Mus musculus (Mouse)","10090","Apolipoprotein E (Apo-E)","false","reviewed","1_2"
"8492","Plasma Membrane","1.012","1","Lrp1 A2mr","Lrp1","Q91ZX7","1.047","Mus musculus (Mouse)","10090","Prolow-density lipoprotein receptor-related protein 1 (LRP-1) (Alpha-2-macroglobulin receptor) (A2MR) (CD antigen CD91) [Cleaved into: Low-density lipoprotein receptor-related protein 1 85 kDa subunit (LRP-85); Low-density lipoprotein receptor-related protein 1 515 kDa subunit (LRP-515); Low-density lipoprotein receptor-related protein 1 intracellular domain (LRPICD)]","false","reviewed","1_2"
"8493","Plasma Membrane","0.865","1","Lsamp","Lsamp","Q8BLK3","1.042","Mus musculus (Mouse)","10090","Limbic system-associated membrane protein (LSAMP)","false","reviewed","1_2"
"8494","Plasma Membrane","0.98","1","Rap1a Krev-1","Rap1a","P62835","0.909","Mus musculus (Mouse)","10090","Ras-related protein Rap-1A (Ras-related protein Krev-1)","false","reviewed","1_1"
"8495","Signaling Cascade","1.03","1","Ppp1r9b","Ppp1r9b","Q6R891","1.101","Mus musculus (Mouse)","10090","Neurabin-2 (Neurabin-II) (Protein phosphatase 1 regulatory subunit 9B) (Spinophilin)","false","reviewed","1_6"
"8496","Signaling Cascade","0.92","1","Cdc42","Cdc42","P60766","0.971","Mus musculus (Mouse)","10090","Cell division control protein 42 homolog (G25K GTP-binding protein)","false","reviewed","1_6"
"8497","Cytoskeleton","0.979","1","Myo5a Dilute","Myo5a","Q99104","1.045","Mus musculus (Mouse)","10090","Unconventional myosin-Va (Dilute myosin heavy chain, non-muscle)","false","reviewed","1_4"
"8498","Signaling Cascade","0.772","1","Pea15 Pea15a","Pea15","Q62048","0.91","Mus musculus (Mouse)","10090","Astrocytic phosphoprotein PEA-15 (15 kDa phosphoprotein enriched in astrocytes)","false","reviewed","1_1"
"8499","Mitochondrion","1.109","1","Slc25a22 Gc1","Slc25a22","Q9D6M3","1.131","Mus musculus (Mouse)","10090","Mitochondrial glutamate carrier 1 (GC-1) (Glutamate/H(+) symporter 1) (Solute carrier family 25 member 22)","false","reviewed","1_1"
"8500","Cytoplasm","0.993","4","Pfkm Pfk-m Pfka","Pfkm","P47857","1.019","Mus musculus (Mouse)","10090","ATP-dependent 6-phosphofructokinase, muscle type (ATP-PFK) (PFK-M) (EC 2.7.1.11) (6-phosphofructokinase type A) (Phosphofructo-1-kinase isozyme A) (PFK-A) (Phosphohexokinase)","false","reviewed","4_2"
"8501","Cytoskeleton","0.962","1","Tuba4a Tuba4","Tuba4a","P68368","1.03","Mus musculus (Mouse)","10090","Tubulin alpha-4A chain (Alpha-tubulin 4) (Alpha-tubulin isotype M-alpha-4) (Tubulin alpha-4 chain)","false","reviewed","1_10"
"8502","Signaling Cascade","1.1","1","Pdia6 Txndc7","Pdia6","Q922R8","1.044","Mus musculus (Mouse)","10090","Protein disulfide-isomerase A6 (EC 5.3.4.1) (Thioredoxin domain-containing protein 7)","false","reviewed","1_2"
"8503","Cytoskeleton","0.832","1","Mapt Mtapt Tau","Mapt","P10637","0.823","Mus musculus (Mouse)","10090","Microtubule-associated protein tau (Neurofibrillary tangle protein) (Paired helical filament-tau) (PHF-tau)","false","reviewed","1_2"
"8504","Plasma Membrane","1.016","2","Aqp4","Aqp4","P55088","0.847","Mus musculus (Mouse)","10090","Aquaporin-4 (AQP-4) (Mercurial-insensitive water channel) (MIWC) (WCH4)","false","reviewed","2_1"
"8505","Synaptic Vesicle","1.096","2","Ap2b1 Clapb1","Ap2b1","Q9DBG3","0.926","Mus musculus (Mouse)","10090","AP-2 complex subunit beta (AP105B) (Adaptor protein complex AP-2 subunit beta) (Adaptor-related protein complex 2 subunit beta) (Beta-2-adaptin) (Beta-adaptin) (Clathrin assembly protein complex 2 beta large chain) (Plasma membrane adaptor HA2/AP2 adaptin beta subunit)","false","reviewed","2_3"
"8506","Synaptic Vesicle","0.804","2","Cltb","Cltb","Q6IRU5","0.81","Mus musculus (Mouse)","10090","Clathrin light chain B (Lcb)","false","reviewed","2_3"
"8507","Synaptic Vesicle","1.037","4","Eno2 Eno-2","Eno2","P17183","0.926","Mus musculus (Mouse)","10090","Gamma-enolase (EC 4.2.1.11) (2-phospho-D-glycerate hydro-lyase) (Enolase 2) (Neural enolase) (Neuron-specific enolase) (NSE)","false","reviewed","4_2"
"8508","Cytoskeleton","0.905","1","Dbn1 Drba","Dbn1","Q9QXS6","1.005","Mus musculus (Mouse)","10090","Drebrin (Developmentally-regulated brain protein)","false","reviewed","1_4"
"8509","Cytoplasm","1.076","2","Elmo2 Kiaa1834","Elmo2","Q8BHL5","1.019","Mus musculus (Mouse)","10090","Engulfment and cell motility protein 2 (Protein ced-12 homolog A)","false","reviewed","2_2"
"8510","Cytoplasm","1.024","5","Ctbp1","Ctbp1","O88712","0.979","Mus musculus (Mouse)","10090","C-terminal-binding protein 1 (CtBP1) (EC 1.1.1.-)","false","reviewed","5_4"
"8511","Mitochondrion","1.065","4","Isca2 Hbld1","Isca2","Q9DCB8","1.045","Mus musculus (Mouse)","10090","Iron-sulfur cluster assembly 2 homolog, mitochondrial (HESB-like domain-containing protein 1)","false","reviewed","4_5"
"8512","Mitochondrion","1.039","4","Nfs1 Nifs","Nfs1","Q9Z1J3","1.073","Mus musculus (Mouse)","10090","Cysteine desulfurase, mitochondrial (m-Nfs1) (EC 2.8.1.7)","false","reviewed","4_5"
"8513","Mitochondrion","1.05","4","Me3","Me3","Q8BMF3","1.109","Mus musculus (Mouse)","10090","NADP-dependent malic enzyme, mitochondrial (NADP-ME) (EC 1.1.1.40) (Malic enzyme 3)","false","reviewed","4_1"
"8514","Mitochondrion","0.94","3","Ndufa4","Ndufa4","Q62425","1.179","Mus musculus (Mouse)","10090","Cytochrome c oxidase subunit NDUFA4","false","reviewed","3_1"
"8515","Mitochondrion","1.069","6","Hspa9 Grp75 Hsp74 Hspa9a","Hspa9","P38647","1.207","Mus musculus (Mouse)","10090","Stress-70 protein, mitochondrial (75 kDa glucose-regulated protein) (GRP-75) (Heat shock 70 kDa protein 9) (Mortalin) (Peptide-binding protein 74) (PBP74) (p66 MOT)","false","reviewed","6_4"
"8516","Synaptic Vesicle","0.956","1","Rab3a","Rab3a","P63011","0.989","Mus musculus (Mouse)","10090","Ras-related protein Rab-3A","false","reviewed","1_6"
"8517","Cytoskeleton","1.03","1","Cttn Ems1","Cttn","Q60598","0.874","Mus musculus (Mouse)","10090","Src substrate cortactin","false","reviewed","1_8"
"8518","Cytoskeleton","1.005","1","Actr2 Arp2","Actr2","P61161","0.993","Mus musculus (Mouse)","10090","Actin-related protein 2 (Actin-like protein 2)","false","reviewed","1_8"
"8519","Mitochondrion","1.067","4","Aifm1 Aif Pdcd8","Aifm1","Q9Z0X1","1.111","Mus musculus (Mouse)","10090","Apoptosis-inducing factor 1, mitochondrial (EC 1.1.1.-) (Programmed cell death protein 8)","false","reviewed","4_3"
"8520","Signaling Cascade","0.82","2","Cdipt Pis1","Cdipt","Q8VDP6","0.945","Mus musculus (Mouse)","10090","CDP-diacylglycerol--inositol 3-phosphatidyltransferase (EC 2.7.8.11) (Phosphatidylinositol synthase) (PI synthase) (PtdIns synthase)","false","reviewed","2_5"
"8521","Mitochondrion","1.079","2","Cds2","Cds2","Q99L43","1.02","Mus musculus (Mouse)","10090","Phosphatidate cytidylyltransferase 2 (EC 2.7.7.41) (CDP-DAG synthase 2) (CDP-DG synthase 2) (CDP-diacylglycerol synthase 2) (CDS 2) (CDP-diglyceride pyrophosphorylase 2) (CDP-diglyceride synthase 2) (CTP:phosphatidate cytidylyltransferase 2)","false","reviewed","2_5"
"8522","Mitochondrion","1.072","4","Immt Mic60","Immt","Q8CAQ8","1.221","Mus musculus (Mouse)","10090","MICOS complex subunit Mic60 (Mitochondrial inner membrane protein) (Mitofilin)","false","reviewed","4_6"
"8523","Mitochondrion","1.001","5","Auh","Auh","Q9JLZ3","1.106","Mus musculus (Mouse)","10090","Methylglutaconyl-CoA hydratase, mitochondrial (EC 4.2.1.18) (AU-specific RNA-binding enoyl-CoA hydratase) (AU-binding enoyl-CoA hydratase) (muAUH)","false","reviewed","5_3"
"8524","Mitochondrion","0.677","3","Cox7c Cox7c1","Cox7c","P17665","0.872","Mus musculus (Mouse)","10090","Cytochrome c oxidase subunit 7C, mitochondrial (Cytochrome c oxidase polypeptide VIIc)","false","reviewed","3_2"
"8525","Mitochondrion","0.953","4","Vdac3","Vdac3","Q60931","1.146","Mus musculus (Mouse)","10090","Voltage-dependent anion-selective channel protein 3 (VDAC-3) (mVDAC3) (Outer mitochondrial membrane protein porin 3)","false","reviewed","4_1"
"8526","Mitochondrion","1.116","5","Acat1","Acat1","Q8QZT1","1.224","Mus musculus (Mouse)","10090","Acetyl-CoA acetyltransferase, mitochondrial (EC 2.3.1.9) (Acetoacetyl-CoA thiolase)","false","reviewed","5_1"
"8527","Plasma Membrane","1.013","2","Sgip1","Sgip1","Q8VD37","0.972","Mus musculus (Mouse)","10090","SH3-containing GRB2-like protein 3-interacting protein 1 (Endophilin-3-interacting protein)","false","reviewed","2_1"
"8528","Cytoplasm","0.986","4","Gapdh Gapd","Gapdh","P16858","0.965","Mus musculus (Mouse)","10090","Glyceraldehyde-3-phosphate dehydrogenase (GAPDH) (EC 1.2.1.12) (Peptidyl-cysteine S-nitrosylase GAPDH) (EC 2.6.99.-)","false","reviewed","4_2"
"8529","Cytoskeleton","0.946","1","Rhob Arhb","Rhob","P62746","0.96","Mus musculus (Mouse)","10090","Rho-related GTP-binding protein RhoB","false","reviewed","1_6"
"8530","Plasma Membrane","0.933","1","L1cam Caml1","L1cam","P11627","1.14","Mus musculus (Mouse)","10090","Neural cell adhesion molecule L1 (N-CAM-L1) (NCAM-L1) (CD antigen CD171)","false","reviewed","1_2"
"8531","Plasma Membrane","0.914","1","Ncam1 Ncam","Ncam1","P13595","0.987","Mus musculus (Mouse)","10090","Neural cell adhesion molecule 1 (N-CAM-1) (NCAM-1) (CD antigen CD56)","false","reviewed","1_2"
"8532","Cytoskeleton","1.096","2","Baiap2","Baiap2","Q8BKX1","0.891","Mus musculus (Mouse)","10090","Brain-specific angiogenesis inhibitor 1-associated protein 2 (BAI-associated protein 2) (BAI1-associated protein 2) (Insulin receptor substrate protein of 53 kDa) (IRSp53) (Insulin receptor substrate p53) (Insulin receptor tyrosine kinase 53 kDa substrate)","false","reviewed","2_1"
"8533","Plasma Membrane","1.038","1","Cask","Cask","O70589","1.062","Mus musculus (Mouse)","10090","Peripheral plasma membrane protein CASK (EC 2.7.11.1) (Calcium/calmodulin-dependent serine protein kinase)","false","reviewed","1_9"
"8534","Signaling Cascade","0.837","1","Cnp Cnp1","Cnp","P16330","0.839","Mus musculus (Mouse)","10090","2',3'-cyclic-nucleotide 3'-phosphodiesterase (CNP) (CNPase) (EC 3.1.4.37)","false","reviewed","1_9"
"8535","Cytoplasm","1.065","1","Gfap","Gfap","P03995","0.818","Mus musculus (Mouse)","10090","Glial fibrillary acidic protein (GFAP)","false","reviewed","1_4"
"8536","Cytoskeleton","0.92","1","Tubb5","Tubb5","P99024","1.067","Mus musculus (Mouse)","10090","Tubulin beta-5 chain","false","reviewed","1_3"
"8537","Plasma Membrane","0.927","1","Dpp6 Dpp-6","Dpp6","Q9Z218","1.035","Mus musculus (Mouse)","10090","Dipeptidyl aminopeptidase-like protein 6 (DPPX) (Dipeptidyl aminopeptidase-related protein) (Dipeptidyl peptidase 6) (Dipeptidyl peptidase IV-like protein) (Dipeptidyl peptidase VI) (DPP VI)","false","reviewed","1_2"
"8538","Synaptic Vesicle","1.032","2","Ap2m1 Clapm1","Ap2m1","P84091","1.0","Mus musculus (Mouse)","10090","AP-2 complex subunit mu (AP-2 mu chain) (Adaptor protein complex AP-2 subunit mu) (Adaptor-related protein complex 2 subunit mu) (Clathrin assembly protein complex 2 mu medium chain) (Clathrin coat assembly protein AP50) (Clathrin coat-associated protein AP50) (Mu2-adaptin) (Plasma membrane adaptor AP-2 50 kDa protein)","false","reviewed","2_3"
"8539","Signaling Cascade","1.0","1","Apbb1 Fe65","Apbb1","Q9QXJ1","1.0","Mus musculus (Mouse)","10090","Amyloid beta A4 precursor protein-binding family B member 1 (Protein Fe65)","false","reviewed","1_2"
"8540","Cytoskeleton","1.169","1","Actc1 Actc","Actc1","P68033","1.036","Mus musculus (Mouse)","10090","Actin, alpha cardiac muscle 1 (Alpha-cardiac actin)","false","reviewed","1_1"
"8541","Plasma Membrane","1.015","4","Ak1","Ak1","Q9R0Y5","0.967","Mus musculus (Mouse)","10090","Adenylate kinase isoenzyme 1 (AK 1) (EC 2.7.4.3) (EC 2.7.4.6) (ATP-AMP transphosphorylase 1) (ATP:AMP phosphotransferase) (Adenylate monophosphate kinase) (Myokinase)","false","reviewed","4_2"
"8542","Mitochondrion","1.123","5","Mtx1 Mtx Mtxn","Mtx1","P47802","1.149","Mus musculus (Mouse)","10090","Metaxin-1 (Mitochondrial outer membrane import complex protein 1)","false","reviewed","5_6"
"8543","Plasma Membrane","0.927","1","Atp1a2","Atp1a2","Q6PIE5","1.049","Mus musculus (Mouse)","10090","Sodium/potassium-transporting ATPase subunit alpha-2 (Na(+)/K(+) ATPase alpha-2 subunit) (EC 3.6.3.9) (Na(+)/K(+) ATPase alpha(+) subunit) (Sodium pump subunit alpha-2)","false","reviewed","1_3"
"8544","Plasma Membrane","0.925","1","Slc8a1 Ncx","Slc8a1","P70414","1.01","Mus musculus (Mouse)","10090","Sodium/calcium exchanger 1 (Na(+)/Ca(2+)-exchange protein 1) (Solute carrier family 8 member 1)","false","reviewed","1_3"
"8545","Signaling Cascade","1.062","1","Camk2b Camk2d","Camk2b","P28652","1.054","Mus musculus (Mouse)","10090","Calcium/calmodulin-dependent protein kinase type II subunit beta (CaM kinase II subunit beta) (CaMK-II subunit beta) (EC 2.7.11.17)","false","reviewed","1_1"
"8546","Cytoplasm","1.002","5","Psat1 Psa Psat","Psat1","Q99K85","0.98","Mus musculus (Mouse)","10090","Phosphoserine aminotransferase (PSAT) (EC 2.6.1.52) (Endometrial progesterone-induced protein) (EPIP) (Phosphohydroxythreonine aminotransferase)","false","reviewed","5_4"
"8547","Signaling Cascade","0.95","6","Hspa2 Hcp70.2 Hsp70-2","Hspa2","P17156","1.012","Mus musculus (Mouse)","10090","Heat shock-related 70 kDa protein 2 (Heat shock protein 70.2)","false","reviewed","6_4"
"8548","Signaling Cascade","0.309","1","Calm1 Calm Cam Cam1; Calm2 Cam2 Camb; Calm3 Cam3 Camc","Calm1; Calm2; Calm3","P62204","0.542","Mus musculus (Mouse)","10090","Calmodulin (CaM)","false","reviewed","1_1"
"8549","Signaling Cascade","0.886","1","Ywhaq","Ywhaq","P68254","0.831","Mus musculus (Mouse)","10090","14-3-3 protein theta (14-3-3 protein tau)","false","reviewed","1_2"
"8550","Synaptic Vesicle","0.936","4","Pgam1","Pgam1","Q9DBJ1","0.878","Mus musculus (Mouse)","10090","Phosphoglycerate mutase 1 (EC 3.1.3.13) (EC 5.4.2.11) (EC 5.4.2.4) (BPG-dependent PGAM 1) (Phosphoglycerate mutase isozyme B) (PGAM-B)","false","reviewed","4_2"
"8551","Plasma Membrane","0.925","1","Gria1 Glur1","Gria1","P23818","1.044","Mus musculus (Mouse)","10090","Glutamate receptor 1 (GluR-1) (AMPA-selective glutamate receptor 1) (GluR-A) (GluR-K1) (Glutamate receptor ionotropic, AMPA 1) (GluA1)","false","reviewed","1_1"
"8552","Signaling Cascade","0.986","1","Git1","Git1","Q68FF6","1.06","Mus musculus (Mouse)","10090","ARF GTPase-activating protein GIT1 (ARF GAP GIT1) (G protein-coupled receptor kinase-interactor 1) (GRK-interacting protein 1)","false","reviewed","1_4"
"8553","Signaling Cascade","1.006","1","Ctnnd1 Catns Kiaa0384","Ctnnd1","P30999","0.942","Mus musculus (Mouse)","10090","Catenin delta-1 (Cadherin-associated Src substrate) (CAS) (p120 catenin) (p120(ctn)) (p120(cas))","false","reviewed","1_5"
"8554","Plasma Membrane","1.055","1","Kcnab2 Ckbeta2 I2rf5 Kcnb3","Kcnab2","P62482","0.933","Mus musculus (Mouse)","10090","Voltage-gated potassium channel subunit beta-2 (K(+) channel subunit beta-2) (Kv-beta-2) (Neuroimmune protein F5)","false","reviewed","1_4"
"8555","Signaling Cascade","1.082","1","Ppp2r5c","Ppp2r5c","Q60996","0.969","Mus musculus (Mouse)","10090","Serine/threonine-protein phosphatase 2A 56 kDa regulatory subunit gamma isoform (PP2A B subunit isoform B'-alpha-3) (PP2A B subunit isoform B'-gamma) (PP2A B subunit isoform B56-gamma) (PP2A B subunit isoform PR61-gamma) (PP2A B subunit isoform R5-gamma)","false","reviewed","1_7"
"8556","Synaptic Vesicle","0.956","1","Syt7","Syt7","Q9R0N7","1.052","Mus musculus (Mouse)","10090","Synaptotagmin-7 (Synaptotagmin VII) (SytVII)","false","reviewed","1_3"
"8557","Cytoskeleton","1.062","1","Sptbn1 Elf Spnb-2 Spnb2 Sptb2","Sptbn1","Q62261","0.997","Mus musculus (Mouse)","10090","Spectrin beta chain, non-erythrocytic 1 (Beta-II spectrin) (Embryonic liver fodrin) (Fodrin beta chain)","false","reviewed","1_2"
"8558","Mitochondrion","1.027","6","Atad3 Atad3a Kiaa1273","Atad3","Q925I1","1.138","Mus musculus (Mouse)","10090","ATPase family AAA domain-containing protein 3 (AAA-ATPase TOB3)","false","reviewed","6_1"
"8559","Signaling Cascade","1.018","1","Ppp3cb Calnb","Ppp3cb","P48453","0.974","Mus musculus (Mouse)","10090","Serine/threonine-protein phosphatase 2B catalytic subunit beta isoform (EC 3.1.3.16) (CAM-PRP catalytic subunit) (Calmodulin-dependent calcineurin A subunit beta isoform)","false","reviewed","1_11"
"8560","Cytoplasm","0.963","2","Shank3 Kiaa1650 Prosap2","Shank3","Q4ACU6","1.07","Mus musculus (Mouse)","10090","SH3 and multiple ankyrin repeat domains protein 3 (Shank3) (Proline-rich synapse-associated protein 2) (ProSAP2) (SPANK-2)","false","reviewed","2_2"
"8561","Plasma Membrane","0.955","1","Nlgn3","Nlgn3","Q8BYM5","0.917","Mus musculus (Mouse)","10090","Neuroligin-3 (Gliotactin homolog)","false","reviewed","1_9"
"8562","Synaptic Vesicle","0.997","1","Sv2a Kiaa0736 Sv2","Sv2a","Q9JIS5","1.001","Mus musculus (Mouse)","10090","Synaptic vesicle glycoprotein 2A (Synaptic vesicle protein 2) (Synaptic vesicle protein 2A) (Calcium regulator SV2A)","false","reviewed","1_4"
"8563","Mitochondrion","0.906","3","Tfam Hmgts","Tfam","P40630","1.19","Mus musculus (Mouse)","10090","Transcription factor A, mitochondrial (mtTFA) (Testis-specific high mobility group protein) (TS-HMG)","false","reviewed","3_2"
"8564","Signaling Cascade","0.938","1","Nrxn1 Kiaa0578","Nrxn1","Q9CS84","1.061","Mus musculus (Mouse)","10090","Neurexin-1 (Neurexin I-alpha) (Neurexin-1-alpha)","false","reviewed","1_9"
"8565","Synaptic Vesicle","0.933","2","Bin1 Amphl Sh3p9","Bin1","O08539","0.898","Mus musculus (Mouse)","10090","Myc box-dependent-interacting protein 1 (Amphiphysin II) (Amphiphysin-like protein) (Bridging integrator 1) (SH3 domain-containing protein 9)","false","reviewed","2_2"
"8566","Cytoskeleton","0.915","1","Epb41l2 Epb4.1l2","Epb41l2","O70318","0.987","Mus musculus (Mouse)","10090","Band 4.1-like protein 2 (Generally expressed protein 4.1) (4.1G)","false","reviewed","1_9"
"8567","Synaptic Vesicle","1.032","1","Syn2","Syn2","Q64332","0.941","Mus musculus (Mouse)","10090","Synapsin-2 (Synapsin II)","false","reviewed","1_4"
"8568","Signaling Cascade","0.735","1","Nrgn","Nrgn","P60761","0.774","Mus musculus (Mouse)","10090","Neurogranin (Ng) (RC3) [Cleaved into: NEUG(55-78)]","false","reviewed","1_4"
"8569","Cytoplasm","1.011","4","Hprt1 Hprt","Hprt1","P00493","0.891","Mus musculus (Mouse)","10090","Hypoxanthine-guanine phosphoribosyltransferase (HGPRT) (HGPRTase) (EC 2.4.2.8) (HPRT B)","false","reviewed","4_3"
"8570","Plasma Membrane","1.05","2","Itsn1 Ese1 Itsn","Itsn1","Q9Z0R4","1.021","Mus musculus (Mouse)","10090","Intersectin-1 (EH and SH3 domains protein 1)","false","reviewed","2_3"
"8571","Mitochondrion","0.947","4","Glrx5","Glrx5","Q80Y14","1.079","Mus musculus (Mouse)","10090","Glutaredoxin-related protein 5, mitochondrial (Monothiol glutaredoxin-5)","false","reviewed","4_5"
"8572","Signaling Cascade","1.037","2","Cyfip2 Kiaa1168 Pir121","Cyfip2","Q5SQX6","0.907","Mus musculus (Mouse)","10090","Cytoplasmic FMR1-interacting protein 2 (p53-inducible protein 121)","false","reviewed","2_1"
"8573","Mitochondrion","0.635","3","Cox6c","Cox6c","Q9CPQ1","0.92","Mus musculus (Mouse)","10090","Cytochrome c oxidase subunit 6C (Cytochrome c oxidase polypeptide VIc)","false","reviewed","3_2"
"8574","Synaptic Vesicle","1.017","1","Camkv","Camkv","Q3UHL1","0.983","Mus musculus (Mouse)","10090","CaM kinase-like vesicle-associated protein","false","reviewed","1_4"
"8575","Mitochondrion","0.905","1","Vdac1 Vdac5","Vdac1","Q60932","1.148","Mus musculus (Mouse)","10090","Voltage-dependent anion-selective channel protein 1 (VDAC-1) (mVDAC1) (Outer mitochondrial membrane protein porin 1) (Plasmalemmal porin) (Voltage-dependent anion-selective channel protein 5) (VDAC-5) (mVDAC5)","false","reviewed","1_5"
"8576","Synaptic Vesicle","0.699","2","Clta","Clta","O08585","0.893","Mus musculus (Mouse)","10090","Clathrin light chain A (Lca)","false","reviewed","2_3"
"8577","Cytoskeleton","1.012","1","Map1a Mtap1 Mtap1a","Map1a","Q9QYR6","0.951","Mus musculus (Mouse)","10090","Microtubule-associated protein 1A (MAP-1A) [Cleaved into: MAP1A heavy chain; MAP1 light chain LC2]","false","reviewed","1_7"
"8578","Plasma Membrane","0.999","6","Ptprz1","Ptprz1","B9EKR1","1.076","Mus musculus (Mouse)","10090","Receptor-type tyrosine-protein phosphatase zeta (R-PTP-zeta) (EC 3.1.3.48)","false","reviewed","6_3"
"8579","Plasma Membrane","1.006","6","Cntnap1 Nrxn4","Cntnap1","O54991","1.048","Mus musculus (Mouse)","10090","Contactin-associated protein 1 (Caspr) (Caspr1) (MHDNIV) (NCP1) (Neurexin IV) (Neurexin-4) (Paranodin)","false","reviewed","6_3"
"8580","Cytoplasm","1.02","5","Akr1b1 Akr1b3 Aldor1 Aldr1","Akr1b1","P45376","0.963","Mus musculus (Mouse)","10090","Aldose reductase (AR) (EC 1.1.1.21) (Aldehyde reductase)","false","reviewed","5_4"
"8581","Synaptic Vesicle","0.914","2","Sh3gl1 Sh3d2b","Sh3gl1","Q62419","0.858","Mus musculus (Mouse)","10090","Endophilin-A2 (Endophilin-2) (SH3 domain protein 2B) (SH3 domain-containing GRB2-like protein 1) (SH3p8)","false","reviewed","2_2"
"8582","Plasma Membrane","0.986","1","Ppfia3","Ppfia3","P60469","0.971","Mus musculus (Mouse)","10090","Liprin-alpha-3 (Protein tyrosine phosphatase receptor type f polypeptide-interacting protein alpha-3) (PTPRF-interacting protein alpha-3)","false","reviewed","1_9"
"8583","Cytoplasm","0.978","4","Ugp2","Ugp2","Q91ZJ5","1.02","Mus musculus (Mouse)","10090","UTP--glucose-1-phosphate uridylyltransferase (EC 2.7.7.9) (UDP-glucose pyrophosphorylase) (UDPGP) (UGPase)","false","reviewed","4_2"
"8584","Signaling Cascade","1.02","1","Ppp3ca Calna","Ppp3ca","P63328","0.945","Mus musculus (Mouse)","10090","Serine/threonine-protein phosphatase 2B catalytic subunit alpha isoform (EC 3.1.3.16) (CAM-PRP catalytic subunit) (Calmodulin-dependent calcineurin A subunit alpha isoform)","false","reviewed","1_11"
"8585","Synaptic Vesicle","0.836","1","Snca Syn","Snca","O55042","0.528","Mus musculus (Mouse)","10090","Alpha-synuclein (Non-A beta component of AD amyloid) (Non-A4 component of amyloid precursor) (NACP)","false","reviewed","1_3"
"8586","Signaling Cascade","0.939","1","Marcksl1 Mlp Mrp","Marcksl1","P28667","0.743","Mus musculus (Mouse)","10090","MARCKS-related protein (Brain protein F52) (MARCKS-like protein 1) (Macrophage myristoylated alanine-rich C kinase substrate) (Mac-MARCKS) (MacMARCKS)","false","reviewed","1_7"
"8587","Plasma Membrane","0.925","2","Chmp4b","Chmp4b","Q9D8B3","0.878","Mus musculus (Mouse)","10090","Charged multivesicular body protein 4b (Chromatin-modifying protein 4b) (CHMP4b)","false","reviewed","2_2"
"8588","Plasma Membrane","0.935","2","Thy1 Thy-1","Thy1","P01831","0.914","Mus musculus (Mouse)","10090","Thy-1 membrane glycoprotein (Thy-1 antigen) (CD antigen CD90)","false","reviewed","2_6"
"8589","Cytoskeleton","0.971","1","Map2 Mtap2","Map2","P20357","0.958","Mus musculus (Mouse)","10090","Microtubule-associated protein 2 (MAP-2)","false","reviewed","1_1"
"8590","Plasma Membrane","1.012","1","Grm5 Gprc1e Mglur5","Grm5","Q3UVX5","1.076","Mus musculus (Mouse)","10090","Metabotropic glutamate receptor 5 (mGluR5)","false","reviewed","1_1"
"8591","Mitochondrion","1.022","5","Acsl6 Facl6","Acsl6","Q91WC3","1.085","Mus musculus (Mouse)","10090","Long-chain-fatty-acid--CoA ligase 6 (EC 6.2.1.3) (Long-chain acyl-CoA synthetase 6) (LACS 6)","false","reviewed","5_5"
"8592","Mitochondrion","1.116","4","Aldh5a1","Aldh5a1","Q8BWF0","1.2","Mus musculus (Mouse)","10090","Succinate-semialdehyde dehydrogenase, mitochondrial (EC 1.2.1.24) (Aldehyde dehydrogenase family 5 member A1) (NAD(+)-dependent succinic semialdehyde dehydrogenase)","false","reviewed","4_1"
"8593","Mitochondrion","1.101","4","Pck2","Pck2","Q8BH04","1.177","Mus musculus (Mouse)","10090","Phosphoenolpyruvate carboxykinase [GTP], mitochondrial (PEPCK-M) (EC 4.1.1.32)","false","reviewed","4_1"
"8594","Mitochondrion","0.97","5","Mccc1 Mcca","Mccc1","Q99MR8","1.102","Mus musculus (Mouse)","10090","Methylcrotonoyl-CoA carboxylase subunit alpha, mitochondrial (MCCase subunit alpha) (EC 6.4.1.4) (3-methylcrotonyl-CoA carboxylase 1) (3-methylcrotonyl-CoA carboxylase biotin-containing subunit) (3-methylcrotonyl-CoA:carbon dioxide ligase subunit alpha)","false","reviewed","5_3"
"8595","Plasma Membrane","0.929","1","Ntm Hnt Nt","Ntm","Q99PJ0","1.079","Mus musculus (Mouse)","10090","Neurotrimin","false","reviewed","1_2"
"8596","Cytoskeleton","0.959","2","Tubb4a Tubb4","Tubb4a","Q9D6F9","0.979","Mus musculus (Mouse)","10090","Tubulin beta-4A chain (Tubulin beta-4 chain)","false","reviewed","2_1"
"8597","Mitochondrion","1.092","5","Acsl1 Acsl2 Facl2","Acsl1","P41216","1.04","Mus musculus (Mouse)","10090","Long-chain-fatty-acid--CoA ligase 1 (EC 6.2.1.3) (Long-chain acyl-CoA synthetase 1) (LACS 1)","false","reviewed","5_5"
"8598","Signaling Cascade","0.999","1","Ppp2r2a","Ppp2r2a","Q6P1F6","0.967","Mus musculus (Mouse)","10090","Serine/threonine-protein phosphatase 2A 55 kDa regulatory subunit B alpha isoform (PP2A subunit B isoform B55-alpha) (PP2A subunit B isoform PR55-alpha) (PP2A subunit B isoform R2-alpha) (PP2A subunit B isoform alpha)","false","reviewed","1_7"
"8599","Plasma Membrane","0.948","1","Napb Snapb","Napb","P28663","0.894","Mus musculus (Mouse)","10090","Beta-soluble NSF attachment protein (SNAP-beta) (Brain protein I47) (N-ethylmaleimide-sensitive factor attachment protein beta)","false","reviewed","1_3"
"8600","Signaling Cascade","1.04","1","Prkacb Pkacb","Prkacb","P68181","0.933","Mus musculus (Mouse)","10090","cAMP-dependent protein kinase catalytic subunit beta (PKA C-beta) (EC 2.7.11.11)","false","reviewed","1_1"
"8601","Plasma Membrane","1.093","2","Epn1","Epn1","Q80VP1","0.954","Mus musculus (Mouse)","10090","Epsin-1 (EPS-15-interacting protein 1) (Intersectin-EH-binding protein 1) (Ibp1)","false","reviewed","2_3"
"8602","Plasma Membrane","0.907","1","Atp1a3","Atp1a3","Q6PIC6","0.972","Mus musculus (Mouse)","10090","Sodium/potassium-transporting ATPase subunit alpha-3 (Na(+)/K(+) ATPase alpha-3 subunit) (EC 3.6.3.9) (Na(+)/K(+) ATPase alpha(III) subunit) (Sodium pump subunit alpha-3)","false","reviewed","1_1"
"8603","Signaling Cascade","1.045","4","Gda","Gda","Q9R111","0.918","Mus musculus (Mouse)","10090","Guanine deaminase (Guanase) (Guanine aminase) (EC 3.5.4.3) (Guanine aminohydrolase) (GAH)","false","reviewed","4_3"
"8604","Cytoplasm","1.006","4","Pgm1 Pgm2","Pgm1","Q9D0F9","0.997","Mus musculus (Mouse)","10090","Phosphoglucomutase-1 (PGM 1) (EC 5.4.2.2) (Glucose phosphomutase 1) (Phosphoglucomutase-2)","false","reviewed","4_2"
"8605","Mitochondrion","1.055","1","Vat1 Vat-1","Vat1","Q62465","0.928","Mus musculus (Mouse)","10090","Synaptic vesicle membrane protein VAT-1 homolog (EC 1.-.-.-)","false","reviewed","1_4"
"8606","Plasma Membrane","1.124","4","Pygm","Pygm","Q9WUB3","1.082","Mus musculus (Mouse)","10090","Glycogen phosphorylase, muscle form (EC 2.4.1.1) (Myophosphorylase)","false","reviewed","4_2"
"8607","Plasma Membrane","1.097","2","Smap1","Smap1","Q91VZ6","1.012","Mus musculus (Mouse)","10090","Stromal membrane-associated protein 1","false","reviewed","2_3"
"8608","Cytoplasm","0.985","2","Synj1 Kiaa0910","Synj1","Q8CHC4","0.987","Mus musculus (Mouse)","10090","Synaptojanin-1 (EC 3.1.3.36) (Synaptic inositol 1,4,5-trisphosphate 5-phosphatase 1)","false","reviewed","2_2"
"8609","Plasma Membrane","0.951","1","Hras Hras1","Hras","Q61411","0.979","Mus musculus (Mouse)","10090","GTPase HRas (H-Ras-1) (Transforming protein p21) (c-H-ras) (p21ras) [Cleaved into: GTPase HRas, N-terminally processed]","false","reviewed","1_1"
"8610","Signaling Cascade","1.096","1","Arhgef2 Kiaa0651 Lbcl1 Lfc","Arhgef2","Q60875","1.026","Mus musculus (Mouse)","10090","Rho guanine nucleotide exchange factor 2 (Guanine nucleotide exchange factor H1) (GEF-H1) (LBC'S first cousin) (Lymphoid blast crisis-like 1) (Oncogene LFC) (Rhobin)","false","reviewed","1_6"
"8611","Cytoplasm","0.91","2","Impa1","Impa1","O55023","0.963","Mus musculus (Mouse)","10090","Inositol monophosphatase 1 (IMP 1) (IMPase 1) (EC 3.1.3.25) (D-galactose 1-phosphate phosphatase) (EC 3.1.3.94) (Inositol-1(or 4)-monophosphatase 1) (Lithium-sensitive myo-inositol monophosphatase A1)","false","reviewed","2_5"
"8612","Plasma Membrane","0.998","1","Pgrmc2","Pgrmc2","Q80UU9","0.973","Mus musculus (Mouse)","10090","Membrane-associated progesterone receptor component 2","false","reviewed","1_10"
"8613","Cytoplasm","0.991","1","Uchl1","Uchl1","Q9R0P9","0.795","Mus musculus (Mouse)","10090","Ubiquitin carboxyl-terminal hydrolase isozyme L1 (UCH-L1) (EC 3.4.19.12) (EC 6.-.-.-) (Neuron cytoplasmic protein 9.5) (PGP 9.5) (PGP9.5) (Ubiquitin thioesterase L1)","false","reviewed","1_3"
"8614","Plasma Membrane","0.815","2","Chmp6","Chmp6","P0C0A3","0.96","Mus musculus (Mouse)","10090","Charged multivesicular body protein 6 (Chromatin-modifying protein 6)","false","reviewed","2_2"
"8615","Signaling Cascade","0.999","2","Pdcd6ip Aip1 Alix","Pdcd6ip","Q9WU78","0.936","Mus musculus (Mouse)","10090","Programmed cell death 6-interacting protein (ALG-2-interacting protein 1) (ALG-2-interacting protein X) (E2F1-inducible protein) (Eig2)","false","reviewed","2_2"
"8616","Signaling Cascade","0.973","1","Gdi1 Rabgdia","Gdi1","P50396","0.928","Mus musculus (Mouse)","10090","Rab GDP dissociation inhibitor alpha (Rab GDI alpha) (Guanosine diphosphate dissociation inhibitor 1) (GDI-1)","false","reviewed","1_6"
"8617","Synaptic Vesicle","0.934","1","Rab1A Rab1","Rab1A","P62821","1.016","Mus musculus (Mouse)","10090","Ras-related protein Rab-1A (YPT1-related protein)","false","reviewed","1_6"
"8618","Cytoskeleton","0.813","1","Cotl1 Clp","Cotl1","Q9CQI6","0.911","Mus musculus (Mouse)","10090","Coactosin-like protein","false","reviewed","1_8"
"8619","Mitochondrion","0.923","4","Chchd3 Mic19","Chchd3","Q9CRB9","1.165","Mus musculus (Mouse)","10090","MICOS complex subunit Mic19 (Coiled-coil-helix-coiled-coil-helix domain-containing protein 3)","false","reviewed","4_6"
"8620","Synaptic Vesicle","0.845","1","Rab6a Rab6 MNCb-1660","Rab6a","P35279","0.95","Mus musculus (Mouse)","10090","Ras-related protein Rab-6A (Rab-6)","false","reviewed","1_6"
"8621","Signaling Cascade","1.183","1","Csnk1d Hckid","Csnk1d","Q9DC28","0.892","Mus musculus (Mouse)","10090","Casein kinase I isoform delta (CKI-delta) (CKId) (EC 2.7.11.1) (Tau-protein kinase CSNK1D) (EC 2.7.11.26)","false","reviewed","1_7"
"8622","Signaling Cascade","0.932","1","Cops8 Csn8","Cops8","Q8VBV7","0.846","Mus musculus (Mouse)","10090","COP9 signalosome complex subunit 8 (SGN8) (Signalosome subunit 8) (COP9 homolog) (JAB1-containing signalosome subunit 8)","false","reviewed","1_10"
"8623","Synaptic Vesicle","0.926","1","Rph3a","Rph3a","P47708","0.958","Mus musculus (Mouse)","10090","Rabphilin-3A (Exophilin-1)","false","reviewed","1_6"
"8624","Cytoskeleton","0.938","1","Myl6 Myln","Myl6","Q60605","0.877","Mus musculus (Mouse)","10090","Myosin light polypeptide 6 (17 kDa myosin light chain) (LC17) (Myosin light chain 3) (MLC-3) (Myosin light chain alkali 3) (Myosin light chain A3) (Smooth muscle and nonmuscle myosin light chain alkali 6)","false","reviewed","1_1"
"8625","Plasma Membrane","0.931","1","Gabrg2","Gabrg2","P22723","1.136","Mus musculus (Mouse)","10090","Gamma-aminobutyric acid receptor subunit gamma-2 (GABA(A) receptor subunit gamma-2)","false","reviewed","1_11"
"8626","Synaptic Vesicle","0.849","2","Ap2s1 Ap17 Claps2","Ap2s1","P62743","0.911","Mus musculus (Mouse)","10090","AP-2 complex subunit sigma (Adaptor protein complex AP-2 subunit sigma) (Adaptor-related protein complex 2 subunit sigma) (Clathrin assembly protein 2 sigma small chain) (Clathrin coat assembly protein AP17) (Clathrin coat-associated protein AP17) (Plasma membrane adaptor AP-2 17 kDa protein) (Sigma-adaptin 3b) (Sigma2-adaptin)","false","reviewed","2_3"
"8627","Cytoskeleton","0.983","1","Nefh Kiaa0845 Nfh","Nefh","P19246","0.856","Mus musculus (Mouse)","10090","Neurofilament heavy polypeptide (NF-H) (200 kDa neurofilament protein) (Neurofilament triplet H protein)","false","reviewed","1_4"
"8628","Signaling Cascade","1.047","5","Madd Kiaa0358","Madd","Q80U28","1.029","Mus musculus (Mouse)","10090","MAP kinase-activating death domain protein (Rab3 GDP/GTP exchange factor)","false","reviewed","5_1"
"8629","Cytoskeleton","0.977","1","Fscn1 Fan1 Snl","Fscn1","Q61553","0.925","Mus musculus (Mouse)","10090","Fascin (Singed-like protein)","false","reviewed","1_10"
"8630","Plasma Membrane","0.898","1","Nfasc","Nfasc","Q810U3","1.034","Mus musculus (Mouse)","10090","Neurofascin","false","reviewed","1_2"
"8631","Signaling Cascade","0.959","1","Csnk2b Ck2n","Csnk2b","P67871","0.945","Mus musculus (Mouse)","10090","Casein kinase II subunit beta (CK II beta) (Phosvitin)","false","reviewed","1_10"
"8632","Cytoplasm","0.93","2","Sh3glb2 Kiaa1848","Sh3glb2","Q8R3V5","0.966","Mus musculus (Mouse)","10090","Endophilin-B2 (SH3 domain-containing GRB2-like protein B2)","false","reviewed","2_2"
"8633","Mitochondrion","1.06","4","Opa1","Opa1","P58281","1.15","Mus musculus (Mouse)","10090","Dynamin-like 120 kDa protein, mitochondrial (EC 3.6.5.5) (Large GTP-binding protein) (LargeG) (Optic atrophy protein 1 homolog) [Cleaved into: Dynamin-like 120 kDa protein, form S1]","false","reviewed","4_3"
"8634","Cytoskeleton","0.916","1","Map4 Mtap4","Map4","P27546","0.962","Mus musculus (Mouse)","10090","Microtubule-associated protein 4 (MAP-4)","false","reviewed","1_3"
"8635","Signaling Cascade","0.926","1","Prkcg Pkcc Pkcg Prkcc","Prkcg","P63318","1.126","Mus musculus (Mouse)","10090","Protein kinase C gamma type (PKC-gamma) (EC 2.7.11.13)","false","reviewed","1_1"
"8636","Plasma Membrane","0.8","4","Pebp1 Pbp Pebp","Pebp1","P70296","0.825","Mus musculus (Mouse)","10090","Phosphatidylethanolamine-binding protein 1 (PEBP-1) (HCNPpp) [Cleaved into: Hippocampal cholinergic neurostimulating peptide (HCNP)]","false","reviewed","4_2"
"8637","Plasma Membrane","0.902","7","Slc1a3 Eaat1 Gmt1","Slc1a3","P56564","1.075","Mus musculus (Mouse)","10090","Excitatory amino acid transporter 1 (Glial high affinity glutamate transporter) (High-affinity neuronal glutamate transporter) (Sodium-dependent glutamate/aspartate transporter 1) (GLAST-1) (Solute carrier family 1 member 3)","false","reviewed","7"
"8638","Mitochondrion","0.887","3","Mtco2 COII mt-Co2","Mtco2","P00405","1.094","Mus musculus (Mouse)","10090","Cytochrome c oxidase subunit 2 (Cytochrome c oxidase polypeptide II)","false","reviewed","3_2"
"8639","Signaling Cascade","0.96","2","Arfgap1 Arf1gap","Arfgap1","Q9EPJ9","1.024","Mus musculus (Mouse)","10090","ADP-ribosylation factor GTPase-activating protein 1 (ARF GAP 1) (ADP-ribosylation factor 1 GTPase-activating protein) (ARF1 GAP) (ARF1-directed GTPase-activating protein)","false","reviewed","2_5"
"8640","Synaptic Vesicle","0.935","2","Stxbp5l Llgl4","Stxbp5l","Q5DQR4","1.077","Mus musculus (Mouse)","10090","Syntaxin-binding protein 5-like (Lethal(2) giant larvae protein homolog 4) (Tomosyn-2)","false","reviewed","2_1"
"8641","Cytoplasm","1.072","1","Ptpn9","Ptpn9","O35239","0.99","Mus musculus (Mouse)","10090","Tyrosine-protein phosphatase non-receptor type 9 (EC 3.1.3.48) (Protein-tyrosine phosphatase MEG2) (PTPase MEG2)","false","reviewed","1_3"
"8642","Mitochondrion","1.028","5","Maob","Maob","Q8BW75","1.148","Mus musculus (Mouse)","10090","Amine oxidase [flavin-containing] B (EC 1.4.3.4) (Monoamine oxidase type B) (MAO-B)","false","reviewed","5_2"
"8643","Synaptic Vesicle","1.028","1","Stxbp1","Stxbp1","O08599","0.901","Mus musculus (Mouse)","10090","Syntaxin-binding protein 1 (Protein unc-18 homolog 1) (Unc18-1) (Protein unc-18 homolog A) (Unc-18A)","false","reviewed","1_3"
"8644","Cytoskeleton","1.018","1","Plec Plec1","Plec","Q9QXS1","0.997","Mus musculus (Mouse)","10090","Plectin (PCN) (PLTN) (Plectin-1) (Plectin-6)","false","reviewed","1_4"
"8645","Signaling Cascade","1.026","2","Prkca Pkca","Prkca","P20444","1.091","Mus musculus (Mouse)","10090","Protein kinase C alpha type (PKC-A) (PKC-alpha) (EC 2.7.11.13)","false","reviewed","2_2"
"8646","Mitochondrion","0.893","1","Vdac2 Vdac6","Vdac2","Q60930","1.161","Mus musculus (Mouse)","10090","Voltage-dependent anion-selective channel protein 2 (VDAC-2) (mVDAC2) (Outer mitochondrial membrane protein porin 2) (Voltage-dependent anion-selective channel protein 6) (VDAC-6) (mVDAC6)","false","reviewed","1_10"
"8647","Plasma Membrane","0.974","6","Rtn4 Kiaa0886 Nogo","Rtn4","Q99P72","0.95","Mus musculus (Mouse)","10090","Reticulon-4 (Neurite outgrowth inhibitor) (Nogo protein)","false","reviewed","6_3"
"8648","Synaptic Vesicle","1.088","2","Ap1b1 Adtb1","Ap1b1","O35643","0.978","Mus musculus (Mouse)","10090","AP-1 complex subunit beta-1 (Adaptor protein complex AP-1 subunit beta-1) (Adaptor-related protein complex 1 subunit beta-1) (Beta-1-adaptin) (Beta-adaptin 1) (Clathrin assembly protein complex 1 beta large chain) (Golgi adaptor HA1/AP1 adaptin beta subunit)","false","reviewed","2_3"
"8649","Synaptic Vesicle","1.09","2","Syngr3","Syngr3","Q8R191","0.962","Mus musculus (Mouse)","10090","Synaptogyrin-3","false","reviewed","2_6"
"8650","Cytoskeleton","1.117","1","Actr1a Ctrn1","Actr1a","P61164","0.99","Mus musculus (Mouse)","10090","Alpha-centractin (Centractin) (ARP1) (Actin-RPV) (Centrosome-associated actin homolog)","false","reviewed","1_10"
"8651","Synaptic Vesicle","0.711","1","Syngr1","Syngr1","O55100","0.901","Mus musculus (Mouse)","10090","Synaptogyrin-1","false","reviewed","1_1"
"8652","Signaling Cascade","0.97","1","Brsk1 Gm1100 Sadb","Brsk1","Q5RJI5","1.078","Mus musculus (Mouse)","10090","Serine/threonine-protein kinase BRSK1 (EC 2.7.11.1) (EC 2.7.11.26) (Brain-specific serine/threonine-protein kinase 1) (BR serine/threonine-protein kinase 1) (Serine/threonine-protein kinase SAD-B)","false","reviewed","1_4"
"8653","Synaptic Vesicle","0.997","2","Dnm3 Kiaa0820","Dnm3","Q8BZ98","0.887","Mus musculus (Mouse)","10090","Dynamin-3 (EC 3.6.5.5)","false","reviewed","2_2"
"8654","Signaling Cascade","0.999","2","Pacsin1 Pacsin","Pacsin1","Q61644","0.939","Mus musculus (Mouse)","10090","Protein kinase C and casein kinase substrate in neurons protein 1 (Syndapin-1)","false","reviewed","2_2"
"8655","Cytoplasm","0.972","4","Fasn","Fasn","P19096","0.981","Mus musculus (Mouse)","10090","Fatty acid synthase (EC 2.3.1.85) [Includes: [Acyl-carrier-protein] S-acetyltransferase (EC 2.3.1.38); [Acyl-carrier-protein] S-malonyltransferase (EC 2.3.1.39); 3-oxoacyl-[acyl-carrier-protein] synthase (EC 2.3.1.41); 3-oxoacyl-[acyl-carrier-protein] reductase (EC 1.1.1.100); 3-hydroxyacyl-[acyl-carrier-protein] dehydratase (EC 4.2.1.59); Enoyl-[acyl-carrier-protein] reductase (EC 1.3.1.39); Oleoyl-[acyl-carrier-protein] hydrolase (EC 3.1.2.14)]","false","reviewed","4_4"
"8656","Signaling Cascade","1.009","1","Canx","Canx","P35564","1.094","Mus musculus (Mouse)","10090","Calnexin","false","reviewed","1_2"
"8657","Mitochondrion","1.069","5","Carkd","Carkd","Q9CZ42","1.125","Mus musculus (Mouse)","10090","ATP-dependent (S)-NAD(P)H-hydrate dehydratase (EC 4.2.1.93) (ATP-dependent NAD(P)HX dehydratase) (Carbohydrate kinase domain-containing protein)","false","reviewed","5_2"
"8658","Plasma Membrane","0.878","2","Alcam","Alcam","Q61490","1.028","Mus musculus (Mouse)","10090","CD166 antigen (Activated leukocyte cell adhesion molecule) (Protein DM-GRASP) (CD antigen CD166)","false","reviewed","2_6"
"8659","Synaptic Vesicle","0.936","1","Syt1","Syt1","P46096","1.078","Mus musculus (Mouse)","10090","Synaptotagmin-1 (Synaptotagmin I) (SytI) (p65)","false","reviewed","1_3"
"8660","Mitochondrion","1.086","4","Pdk3","Pdk3","Q922H2","1.149","Mus musculus (Mouse)","10090","[Pyruvate dehydrogenase (acetyl-transferring)] kinase isozyme 3, mitochondrial (EC 2.7.11.2) (Pyruvate dehydrogenase kinase isoform 3)","false","reviewed","4_1"
"8661","Cytoskeleton","0.993","2","Kif2a Kif2 Kns2","Kif2a","P28740","1.024","Mus musculus (Mouse)","10090","Kinesin-like protein KIF2A (Kinesin-2)","false","reviewed","2_2"
"8662","Plasma Membrane","0.966","1","Napg Snapg","Napg","Q9CWZ7","0.921","Mus musculus (Mouse)","10090","Gamma-soluble NSF attachment protein (SNAP-gamma) (N-ethylmaleimide-sensitive factor attachment protein gamma)","false","reviewed","1_3"
"8663","Mitochondrion","1.057","6","Timm44 Mimt44 Tim44","Timm44","O35857","1.069","Mus musculus (Mouse)","10090","Mitochondrial import inner membrane translocase subunit TIM44","false","reviewed","6_4"
"8664","Mitochondrion","1.046","6","Timm50 Tim50","Timm50","Q9D880","1.091","Mus musculus (Mouse)","10090","Mitochondrial import inner membrane translocase subunit TIM50","false","reviewed","6_4"
"8665","Plasma Membrane","0.944","2","Itgav","Itgav","P43406","1.053","Mus musculus (Mouse)","10090","Integrin alpha-V (Vitronectin receptor subunit alpha) (CD antigen CD51) [Cleaved into: Integrin alpha-V heavy chain; Integrin alpha-V light chain]","false","reviewed","2_5"
"8666","Cytoskeleton","1.047","2","Tln2","Tln2","Q71LX4","1.017","Mus musculus (Mouse)","10090","Talin-2","false","reviewed","2_5"
"8667","Mitochondrion","1.124","1","Slc25a4 Anc1 Ant1","Slc25a4","P48962","1.14","Mus musculus (Mouse)","10090","ADP/ATP translocase 1 (ADP,ATP carrier protein 1) (ADP,ATP carrier protein, heart/skeletal muscle isoform T1) (Adenine nucleotide translocator 1) (ANT 1) (Solute carrier family 25 member 4) (mANC1)","false","reviewed","1_5"
"8668","Plasma Membrane","1.015","4","Pygb","Pygb","Q8CI94","1.084","Mus musculus (Mouse)","10090","Glycogen phosphorylase, brain form (EC 2.4.1.1)","false","reviewed","4_2"
"8669","Synaptic Vesicle","0.994","2","Scamp1","Scamp1","Q8K021","0.99","Mus musculus (Mouse)","10090","Secretory carrier-associated membrane protein 1 (Secretory carrier membrane protein 1)","false","reviewed","2_6"
"8670","Synaptic Vesicle","0.955","1","Rala Ral Ral-a","Rala","P63321","0.925","Mus musculus (Mouse)","10090","Ras-related protein Ral-A","false","reviewed","1_1"
"8671","Cytoplasm","1.027","6","Hspa4l Apg1 Hsp4l Osp94","Hspa4l","P48722","1.025","Mus musculus (Mouse)","10090","Heat shock 70 kDa protein 4L (Heat shock 70-related protein APG-1) (Osmotic stress protein 94)","false","reviewed","6_3"
"8672","Mitochondrion","0.763","3","Atpif1 Atpi If1","Atpif1","O35143","1.074","Mus musculus (Mouse)","10090","ATPase inhibitor, mitochondrial (Inhibitor of F(1)F(o)-ATPase) (IF(1)) (IF1)","false","reviewed","3_2"
"8673","Plasma Membrane","0.895","1","Rhog Arhg Sid10750","Rhog","P84096","0.955","Mus musculus (Mouse)","10090","Rho-related GTP-binding protein RhoG (Sid 10750)","false","reviewed","1_6"
"8674","Cytoskeleton","0.894","1","Marcks Macs","Marcks","P26645","0.613","Mus musculus (Mouse)","10090","Myristoylated alanine-rich C-kinase substrate (MARCKS)","false","reviewed","1_1"
"8675","Cytoskeleton","1.001","7","Sept4 Pnutl2","Sept4","P28661","0.916","Mus musculus (Mouse)","10090","Septin-4 (Brain protein H5) (Peanut-like protein 2)","false","reviewed","7"
"8676","Cytoskeleton","0.971","7","Sept2 Nedd-5 Nedd5","Sept2","P42208","0.95","Mus musculus (Mouse)","10090","Septin-2 (Neural precursor cell expressed developmentally down-regulated protein 5) (NEDD-5)","false","reviewed","7"
"8677","Plasma Membrane","1.001","1","Mpp2 Dlgh2","Mpp2","Q9WV34","0.964","Mus musculus (Mouse)","10090","MAGUK p55 subfamily member 2 (Discs large homolog 2) (Protein MPP2)","false","reviewed","1_1"
"8678","Signaling Cascade","1.1","7","Sept5 Pnutl1","Sept5","Q9Z2Q6","0.912","Mus musculus (Mouse)","10090","Septin-5 (Cell division control-related protein 1) (CDCrel-1) (Peanut-like protein 1)","false","reviewed","7"
"8679","Mitochondrion","1.069","2","Letm1","Letm1","Q9Z2I0","1.141","Mus musculus (Mouse)","10090","LETM1 and EF-hand domain-containing protein 1, mitochondrial (Leucine zipper-EF-hand-containing transmembrane protein 1)","false","reviewed","2_1"
"8680","Cytoskeleton","0.831","1","Cfl1","Cfl1","P18760","0.835","Mus musculus (Mouse)","10090","Cofilin-1 (Cofilin, non-muscle isoform)","false","reviewed","1_8"
"8681","Plasma Membrane","1.009","1","Cap1 Cap","Cap1","P40124","0.925","Mus musculus (Mouse)","10090","Adenylyl cyclase-associated protein 1 (CAP 1)","false","reviewed","1_8"
"8682","Cytoplasm","0.991","2","Crym","Crym","O54983","0.995","Mus musculus (Mouse)","10090","Ketimine reductase mu-crystallin (EC 1.5.1.25) (NADP-regulated thyroid-hormone-binding protein)","false","reviewed","2_1"
"8683","Cytoskeleton","0.93","2","Sirt2 Sir2l2","Sirt2","Q8VDQ8","0.866","Mus musculus (Mouse)","10090","NAD-dependent protein deacetylase sirtuin-2 (EC 3.5.1.-) (Regulatory protein SIR2 homolog 2) (SIR2-like protein 2) (mSIR2L2)","false","reviewed","2_1"
"8684","Cytoskeleton","0.994","1","Nefl Nf68 Nfl","Nefl","P08551","0.743","Mus musculus (Mouse)","10090","Neurofilament light polypeptide (NF-L) (68 kDa neurofilament protein) (Neurofilament triplet L protein)","false","reviewed","1_4"
"8685","Mitochondrion","1.073","5","Apoa1bp Aibp","Apoa1bp","Q8K4Z3","1.048","Mus musculus (Mouse)","10090","NAD(P)H-hydrate epimerase (EC 5.1.99.6) (Apolipoprotein A-I-binding protein) (AI-BP) (NAD(P)HX epimerase)","false","reviewed","5_2"
"8686","Cytoskeleton","0.962","1","Nefm Nef3 Nfm","Nefm","P08553","0.805","Mus musculus (Mouse)","10090","Neurofilament medium polypeptide (NF-M) (160 kDa neurofilament protein) (Neurofilament 3) (Neurofilament triplet M protein)","false","reviewed","1_4"
"8687","Cytoplasm","0.983","6","Hsph1 Hsp105 Hsp110 Kiaa0201","Hsph1","Q61699","0.929","Mus musculus (Mouse)","10090","Heat shock protein 105 kDa (42 degrees C-HSP) (Heat shock 110 kDa protein) (Heat shock-related 100 kDa protein E7I) (HSP-E7I)","false","reviewed","6_2"
"8688","Plasma Membrane","0.92","1","Cntn1","Cntn1","P12960","1.078","Mus musculus (Mouse)","10090","Contactin-1 (Neural cell surface protein F3)","false","reviewed","1_2"
"8689","Cytoskeleton","0.98","1","Map6 Mtap6","Map6","Q7TSJ2","0.989","Mus musculus (Mouse)","10090","Microtubule-associated protein 6 (MAP-6) (Stable tubule-only polypeptide) (STOP)","false","reviewed","1_3"
"8690","Plasma Membrane","0.916","1","Ncam2 Ocam Rncam","Ncam2","O35136","0.942","Mus musculus (Mouse)","10090","Neural cell adhesion molecule 2 (N-CAM-2) (NCAM-2) (Neural cell adhesion molecule RB-8) (R4B12)","false","reviewed","1_2"
"8691","Synaptic Vesicle","0.999","7","Sept7 Cdc10","Sept7","O55131","0.952","Mus musculus (Mouse)","10090","Septin-7 (CDC10 protein homolog)","false","reviewed","7"
"8692","Synaptic Vesicle","0.948","1","Vapa Vap33","Vapa","Q9WV55","1.042","Mus musculus (Mouse)","10090","Vesicle-associated membrane protein-associated protein A (VAMP-A) (VAMP-associated protein A) (VAP-A) (33 kDa VAMP-associated protein) (VAP-33)","false","reviewed","1_3"
"8693","Cytoskeleton","1.034","2","Cyfip1 Kiaa0068 Shyc Sra1","Cyfip1","Q7TMB8","0.981","Mus musculus (Mouse)","10090","Cytoplasmic FMR1-interacting protein 1 (Specifically Rac1-associated protein 1) (Sra-1)","false","reviewed","2_1"
"8694","Synaptic Vesicle","1.117","2","Dnajc6 Kiaa0473","Dnajc6","Q80TZ3","0.987","Mus musculus (Mouse)","10090","Putative tyrosine-protein phosphatase auxilin (EC 3.1.3.48) (DnaJ homolog subfamily C member 6)","false","reviewed","2_3"
"8695","Signaling Cascade","1.029","1","Pak1 Paka","Pak1","O88643","0.986","Mus musculus (Mouse)","10090","Serine/threonine-protein kinase PAK 1 (EC 2.7.11.1) (Alpha-PAK) (CDC42/RAC effector kinase PAK-A) (p21-activated kinase 1) (PAK-1) (p65-PAK)","false","reviewed","1_6"
"8696","Mitochondrion","1.086","6","Iars2","Iars2","Q8BIJ6","1.201","Mus musculus (Mouse)","10090","Isoleucine--tRNA ligase, mitochondrial (EC 6.1.1.5) (Isoleucyl-tRNA synthetase) (IleRS)","false","reviewed","6_1"
"8697","Signaling Cascade","0.944","1","Lrpap1","Lrpap1","P55302","1.001","Mus musculus (Mouse)","10090","Alpha-2-macroglobulin receptor-associated protein (Alpha-2-MRAP) (Heparin-binding protein 44) (HBP-44) (Low density lipoprotein receptor-related protein-associated protein 1) (RAP)","false","reviewed","1_2"
"8698","Plasma Membrane","0.801","1","Basp1 Nap22","Basp1","Q91XV3","0.636","Mus musculus (Mouse)","10090","Brain acid soluble protein 1 (22 kDa neuronal tissue-enriched acidic protein) (Neuronal axonal membrane protein NAP-22)","false","reviewed","1_1"
"8699","Cytoplasm","1.059","1","Cbr1 Cbr","Cbr1","P48758","0.935","Mus musculus (Mouse)","10090","Carbonyl reductase [NADPH] 1 (EC 1.1.1.184) (15-hydroxyprostaglandin dehydrogenase [NADP(+)]) (EC 1.1.1.197) (NADPH-dependent carbonyl reductase 1) (Prostaglandin 9-ketoreductase) (Prostaglandin-E(2) 9-reductase) (EC 1.1.1.189)","false","reviewed","1_4"
"8700","Plasma Membrane","0.913","1","Adam22","Adam22","Q9R1V6","0.983","Mus musculus (Mouse)","10090","Disintegrin and metalloproteinase domain-containing protein 22 (ADAM 22)","false","reviewed","1_1"
"8701","Plasma Membrane","1.013","1","Gja1 Cxn-43","Gja1","P23242","1.006","Mus musculus (Mouse)","10090","Gap junction alpha-1 protein (Connexin-43) (Cx43) (Gap junction 43 kDa heart protein)","false","reviewed","1_5"
"8702","Synaptic Vesicle","0.979","1","Vapb","Vapb","Q9QY76","1.024","Mus musculus (Mouse)","10090","Vesicle-associated membrane protein-associated protein B (VAMP-B) (VAMP-associated protein B) (VAP-B) (VAMP-associated protein 33b)","false","reviewed","1_3"
"8703","Cytoskeleton","1.003","1","Actn4","Actn4","P57780","1.024","Mus musculus (Mouse)","10090","Alpha-actinin-4 (Non-muscle alpha-actinin 4)","false","reviewed","1_2"
"8704","Signaling Cascade","1.046","6","Ppid","Ppid","Q9CR16","0.912","Mus musculus (Mouse)","10090","Peptidyl-prolyl cis-trans isomerase D (PPIase D) (EC 5.2.1.8) (40 kDa peptidyl-prolyl cis-trans isomerase) (Cyclophilin-40) (CYP-40) (Rotamase D)","false","reviewed","6_2"
"8705","Synaptic Vesicle","0.919","1","Rims1 Kiaa0340 Rab3ip1 Rim1","Rims1","Q99NE5","0.996","Mus musculus (Mouse)","10090","Regulating synaptic membrane exocytosis protein 1 (Rab-3-interacting molecule 1) (RIM 1) (Rab-3-interacting protein 1)","false","reviewed","1_12"
"8706","Cytoplasm","1.007","1","Pdxk Pkh","Pdxk","Q8K183","0.952","Mus musculus (Mouse)","10090","Pyridoxal kinase (EC 2.7.1.35) (Pyridoxine kinase)","false","reviewed","1_7"
"8707","Signaling Cascade","0.928","1","Camk2a","Camk2a","P11798","1.09","Mus musculus (Mouse)","10090","Calcium/calmodulin-dependent protein kinase type II subunit alpha (CaM kinase II subunit alpha) (CaMK-II subunit alpha) (EC 2.7.11.17)","false","reviewed","1_1"
"8708","Synaptic Vesicle","0.8","1","Anxa5 Anx5","Anxa5","P48036","0.916","Mus musculus (Mouse)","10090","Annexin A5 (Anchorin CII) (Annexin V) (Annexin-5) (Calphobindin I) (CBP-I) (Endonexin II) (Lipocortin V) (Placental anticoagulant protein 4) (PP4) (Placental anticoagulant protein I) (PAP-I) (Thromboplastin inhibitor) (Vascular anticoagulant-alpha) (VAC-alpha)","false","reviewed","1_10"
"8709","Plasma Membrane","0.874","6","Lingo1 Lern1 Lrrn6a","Lingo1","Q9D1T0","1.037","Mus musculus (Mouse)","10090","Leucine-rich repeat and immunoglobulin-like domain-containing nogo receptor-interacting protein 1 (Leucine-rich repeat neuronal protein 1) (Leucine-rich repeat neuronal protein 6A)","false","reviewed","6_3"
"8710","Cytoplasm","1.006","1","Hspa4 Apg2 Hsp110","Hspa4","Q61316","0.929","Mus musculus (Mouse)","10090","Heat shock 70 kDa protein 4 (Heat shock 70-related protein APG-2)","false","reviewed","1_4"
"8711","Plasma Membrane","1.047","2","Flot1","Flot1","O08917","1.013","Mus musculus (Mouse)","10090","Flotillin-1","false","reviewed","2_7"
"8712","Plasma Membrane","0.936","2","Flot2 Esa1 M17s1","Flot2","Q60634","1.072","Mus musculus (Mouse)","10090","Flotillin-2 (Epidermal surface antigen) (ESA) (Membrane component chromosome 17 surface marker 1 homolog)","false","reviewed","2_7"
"8713","Plasma Membrane","0.877","6","Nptn Sdfr1 Sdr1","Nptn","P97300","1.075","Mus musculus (Mouse)","10090","Neuroplastin (Stromal cell-derived receptor 1) (SDR-1)","false","reviewed","6_3"
"8714","Cytoskeleton","0.971","2","Sept8 Kiaa0202","Sept8","Q8CHH9","0.939","Mus musculus (Mouse)","10090","Septin-8","false","reviewed","2_1"
"8715","Mitochondrion","1.109","3","Slc25a11","Slc25a11","Q9CR62","1.118","Mus musculus (Mouse)","10090","Mitochondrial 2-oxoglutarate/malate carrier protein (OGCP) (Solute carrier family 25 member 11)","false","reviewed","3_3"
"8716","Cytoskeleton","1.059","1","Map1lc3a","Map1lc3a","Q91VR7","0.927","Mus musculus (Mouse)","10090","Microtubule-associated proteins 1A/1B light chain 3A (Autophagy-related protein LC3 A) (Autophagy-related ubiquitin-like modifier LC3 A) (MAP1 light chain 3-like protein 1) (MAP1A/MAP1B light chain 3 A) (MAP1A/MAP1B LC3 A) (Microtubule-associated protein 1 light chain 3 alpha)","false","reviewed","1_7"
"8717","Cytoskeleton","0.955","1","Pkp4 Armrp","Pkp4","Q68FH0","1.101","Mus musculus (Mouse)","10090","Plakophilin-4 (Armadillo-related protein)","false","reviewed","1_5"
"8718","Cytoskeleton","0.934","1","Tubb2a Tubb2","Tubb2a","Q7TMM9","1.024","Mus musculus (Mouse)","10090","Tubulin beta-2A chain","false","reviewed","1_3"
"8719","Signaling Cascade","1.058","2","Psd3 Efa6d Kiaa0942","Psd3","Q2PFD7","1.038","Mus musculus (Mouse)","10090","PH and SEC7 domain-containing protein 3 (Exchange factor for ADP-ribosylation factor guanine nucleotide factor 6) (Pleckstrin homology and SEC7 domain-containing protein 3)","false","reviewed","2_7"
"8720","Cytoplasm","1.102","1","Ak5","Ak5","Q920P5","1.137","Mus musculus (Mouse)","10090","Adenylate kinase isoenzyme 5 (AK 5) (EC 2.7.4.3) (EC 2.7.4.6) (ATP-AMP transphosphorylase 5)","false","reviewed","1_4"
"8721","Cytoskeleton","0.96","1","Myl12b Mrlc2 Mylc2b","Myl12b","Q3THE2","0.942","Mus musculus (Mouse)","10090","Myosin regulatory light chain 12B (Myosin regulatory light chain 2-B, smooth muscle isoform) (Myosin regulatory light chain 20 kDa) (MLC20) (Myosin regulatory light chain MRLC2)","false","reviewed","1_10"
"8722","Signaling Cascade","0.949","1","Ppp2r5e Kiaa4006","Ppp2r5e","Q61151","0.989","Mus musculus (Mouse)","10090","Serine/threonine-protein phosphatase 2A 56 kDa regulatory subunit epsilon isoform (PP2A B subunit isoform B'-epsilon) (PP2A B subunit isoform B56-epsilon) (PP2A B subunit isoform PR61-epsilon) (PP2A B subunit isoform R5-epsilon)","false","reviewed","1_7"
"8723","Mitochondrion","1.144","5","Cbr4","Cbr4","Q91VT4","1.17","Mus musculus (Mouse)","10090","Carbonyl reductase family member 4 (EC 1.-.-.-) (3-oxoacyl-[acyl-carrier-protein] reductase) (EC 1.1.1.-) (Quinone reductase CBR4)","false","reviewed","5_1"
"8724","Mitochondrion","0.971","3","Usmg5 Dapit","Usmg5","Q78IK2","0.954","Mus musculus (Mouse)","10090","Up-regulated during skeletal muscle growth protein 5 (Diabetes-associated protein in insulin-sensitive tissues)","false","reviewed","3_3"
"8725","Cytoskeleton","1.006","2","Actr1b","Actr1b","Q8R5C5","0.964","Mus musculus (Mouse)","10090","Beta-centractin (Actin-related protein 1B) (ARP1B)","false","reviewed","2_1"
"8726","Plasma Membrane","1.0","1","Aplp1","Aplp1","Q03157","1.0","Mus musculus (Mouse)","10090","Amyloid-like protein 1 (APLP) (APLP-1) [Cleaved into: C30]","false","reviewed","1_2"
"8727","Mitochondrion","1.131","6","Lonp1 Prss15","Lonp1","Q8CGK3","1.191","Mus musculus (Mouse)","10090","Lon protease homolog, mitochondrial (EC 3.4.21.-) (Lon protease-like protein) (LONP) (Mitochondrial ATP-dependent protease Lon) (Serine protease 15)","false","reviewed","6_1"
"8728","Cytoplasm","1.037","4","Gpd1l Kiaa0089","Gpd1l","Q3ULJ0","0.942","Mus musculus (Mouse)","10090","Glycerol-3-phosphate dehydrogenase 1-like protein (EC 1.1.1.8)","false","reviewed","4_4"
"8729","Cytoplasm","0.99","1","Pafah1b2 Pafahb","Pafah1b2","Q61206","0.903","Mus musculus (Mouse)","10090","Platelet-activating factor acetylhydrolase IB subunit beta (EC 3.1.1.47) (PAF acetylhydrolase 30 kDa subunit) (PAF-AH 30 kDa subunit) (PAF-AH subunit beta) (PAFAH subunit beta)","false","reviewed","1_7"
"8730","Mitochondrion","1.012","4","Tomm40 Mom35 Tom40","Tomm40","Q9QYA2","1.071","Mus musculus (Mouse)","10090","Mitochondrial import receptor subunit TOM40 homolog (Mitochondrial outer membrane protein of 35 kDa) (MOM35) (Protein Haymaker) (Translocase of outer membrane 40 kDa subunit homolog)","false","reviewed","4_6"
"8731","Plasma Membrane","0.923","1","Igsf8 Ewi2 Kct4 Pgrl","Igsf8","Q8R366","1.026","Mus musculus (Mouse)","10090","Immunoglobulin superfamily member 8 (IgSF8) (CD81 partner 3) (Glu-Trp-Ile EWI motif-containing protein 2) (EWI-2) (Keratinocyte-associated transmembrane protein 4) (KCT-4) (Prostaglandin regulatory-like protein) (PGRL) (CD antigen CD316)","false","reviewed","1_2"
"8732","Plasma Membrane","0.958","1","Syngap1","Syngap1","F6SEU4","1.065","Mus musculus (Mouse)","10090","Ras/Rap GTPase-activating protein SynGAP (Neuronal RasGAP) (Synaptic Ras GTPase-activating protein 1) (Synaptic Ras-GAP 1)","false","reviewed","1_1"
"8733","Signaling Cascade","0.974","1","Fam49b","Fam49b","Q921M7","0.968","Mus musculus (Mouse)","10090","Protein FAM49B","false","reviewed","1_10"
"8734","Mitochondrion","1.061","1","Slc25a12 Aralar1","Slc25a12","Q8BH59","1.18","Mus musculus (Mouse)","10090","Calcium-binding mitochondrial carrier protein Aralar1 (Mitochondrial aspartate glutamate carrier 1) (Solute carrier family 25 member 12)","false","reviewed","1_1"
"8735","Cytoskeleton","0.993","2","Clasp2 Kiaa0627","Clasp2","Q8BRT1","1.055","Mus musculus (Mouse)","10090","CLIP-associating protein 2 (Cytoplasmic linker-associated protein 2)","false","reviewed","2_2"
"8736","Cytoskeleton","1.139","1","Vim","Vim","P20152","0.935","Mus musculus (Mouse)","10090","Vimentin","false","reviewed","1_5"
"8737","Mitochondrion","1.07","6","Tomm70a D16Wsu109e","Tomm70a","Q9CZW5","1.074","Mus musculus (Mouse)","10090","Mitochondrial import receptor subunit TOM70 (Mitochondrial precursor proteins import receptor) (Translocase of outer membrane 70 kDa subunit)","false","reviewed","6_1"
"8738","Signaling Cascade","0.978","1","Nrxn3","Nrxn3","Q6P9K9","1.024","Mus musculus (Mouse)","10090","Neurexin-3 (Neurexin III-alpha) (Neurexin-3-alpha)","false","reviewed","1_9"
"8739","Synaptic Vesicle","1.026","1","Ykt6","Ykt6","Q9CQW1","0.964","Mus musculus (Mouse)","10090","Synaptobrevin homolog YKT6 (EC 2.3.1.-)","false","reviewed","1_10"
"8740","Signaling Cascade","0.958","1","Rheb","Rheb","Q921J2","0.961","Mus musculus (Mouse)","10090","GTP-binding protein Rheb (Ras homolog enriched in brain)","false","reviewed","1_4"
"8741","Cytoskeleton","1.007","1","Tubb3","Tubb3","Q9ERD7","1.014","Mus musculus (Mouse)","10090","Tubulin beta-3 chain","false","reviewed","1_5"
"8742","Plasma Membrane","0.877","2","Slc1a2 Eaat2 Glt1","Slc1a2","P43006","1.051","Mus musculus (Mouse)","10090","Excitatory amino acid transporter 2 (GLT-1) (Sodium-dependent glutamate/aspartate transporter 2) (Solute carrier family 1 member 2)","false","reviewed","2_6"
"8743","Mitochondrion","1.102","2","Bdh1 Bdh","Bdh1","Q80XN0","1.141","Mus musculus (Mouse)","10090","D-beta-hydroxybutyrate dehydrogenase, mitochondrial (BDH) (EC 1.1.1.30) (3-hydroxybutyrate dehydrogenase)","false","reviewed","2_1"
"8744","Signaling Cascade","1.07","1","Ddah1","Ddah1","Q9CWS0","1.078","Mus musculus (Mouse)","10090","N(G),N(G)-dimethylarginine dimethylaminohydrolase 1 (DDAH-1) (Dimethylarginine dimethylaminohydrolase 1) (EC 3.5.3.18) (DDAHI) (Dimethylargininase-1)","false","reviewed","1_10"
"8745","Synaptic Vesicle","0.916","6","Rtn1 Nsp","Rtn1","Q8K0T0","0.884","Mus musculus (Mouse)","10090","Reticulon-1 (Neuroendocrine-specific protein)","false","reviewed","6_3"
"8746","Cytoskeleton","0.864","1","Gsn Gsb","Gsn","P13020","0.95","Mus musculus (Mouse)","10090","Gelsolin (Actin-depolymerizing factor) (ADF) (Brevin)","false","reviewed","1_4"
"8747","Plasma Membrane","0.923","6","Cntn2 Tax","Cntn2","Q61330","1.0","Mus musculus (Mouse)","10090","Contactin-2 (Axonal glycoprotein TAG-1) (Axonin-1) (Transient axonal glycoprotein 1) (TAX-1)","false","reviewed","6_3"
"8748","Signaling Cascade","0.877","1","Ppp3r1 Cnb","Ppp3r1","Q63810","0.893","Mus musculus (Mouse)","10090","Calcineurin subunit B type 1 (Protein phosphatase 2B regulatory subunit 1) (Protein phosphatase 3 regulatory subunit B alpha isoform 1)","false","reviewed","1_11"
"8749","Plasma Membrane","0.875","1","Gria3 Glur3 Kiaa4184","Gria3","Q9Z2W9","1.092","Mus musculus (Mouse)","10090","Glutamate receptor 3 (GluR-3) (AMPA-selective glutamate receptor 3) (GluR-C) (GluR-K3) (Glutamate receptor ionotropic, AMPA 3) (GluA3)","false","reviewed","1_3"
"8750","Cytoplasm","1.005","6","Ckb Ckbb","Ckb","Q04447","0.984","Mus musculus (Mouse)","10090","Creatine kinase B-type (EC 2.7.3.2) (B-CK) (Creatine kinase B chain)","false","reviewed","6_2"
"8751","Plasma Membrane","0.826","1","Palm","Palm","Q9Z0P4","0.971","Mus musculus (Mouse)","10090","Paralemmin-1 (Paralemmin)","false","reviewed","1_3"
"8752","Signaling Cascade","0.878","1","Efhd2 Sws1","Efhd2","Q9D8Y0","0.86","Mus musculus (Mouse)","10090","EF-hand domain-containing protein D2 (Swiprosin-1)","false","reviewed","1_2"
"8753","Plasma Membrane","0.993","1","Cap2","Cap2","Q9CYT6","0.957","Mus musculus (Mouse)","10090","Adenylyl cyclase-associated protein 2 (CAP 2)","false","reviewed","1_8"
"8754","Mitochondrion","0.948","4","Hagh Glo2","Hagh","Q99KB8","0.955","Mus musculus (Mouse)","10090","Hydroxyacylglutathione hydrolase, mitochondrial (EC 3.1.2.6) (Glyoxalase II) (Glx II)","false","reviewed","4_5"
"8755","Mitochondrion","1.143","2","Synj2bp Arip2 Omp25","Synj2bp","Q9D6K5","1.044","Mus musculus (Mouse)","10090","Synaptojanin-2-binding protein (Activin receptor-interacting protein 2) (Activin receptor-interacting protein 4) (Mitochondrial outer membrane protein 25)","false","reviewed","2_2"
"8756","Cytoskeleton","1.075","1","Myh14","Myh14","Q6URW6","1.043","Mus musculus (Mouse)","10090","Myosin-14 (Myosin heavy chain 14) (Myosin heavy chain, non-muscle IIc) (Non-muscle myosin heavy chain IIc) (NMHC II-C)","false","reviewed","1_1"
"8757","Plasma Membrane","0.947","1","Adam23 Mdc3","Adam23","Q9R1V7","1.003","Mus musculus (Mouse)","10090","Disintegrin and metalloproteinase domain-containing protein 23 (ADAM 23) (Metalloproteinase-like, disintegrin-like, and cysteine-rich protein 3) (MDC-3)","false","reviewed","1_2"
"8758","Synaptic Vesicle","1.002","6","Rtn3","Rtn3","Q9ES97","0.956","Mus musculus (Mouse)","10090","Reticulon-3","false","reviewed","6_3"
"8759","Cytoskeleton","0.899","1","Akap5 Akap150","Akap5","D3YVF0","0.916","Mus musculus (Mouse)","10090","A-kinase anchor protein 5 (AKAP-5) (A-kinase anchor protein 150 kDa) (AKAP 150) (P150) (cAMP-dependent protein kinase regulatory subunit II high affinity-binding protein)","false","reviewed","1_1"
"8760","Plasma Membrane","0.938","1","Nrcam Kiaa0343","Nrcam","Q810U4","1.055","Mus musculus (Mouse)","10090","Neuronal cell adhesion molecule (Nr-CAM) (Neuronal surface protein Bravo) (mBravo) (NgCAM-related cell adhesion molecule) (Ng-CAM-related)","false","reviewed","1_2"
"8761","Signaling Cascade","1.031","1","Kalrn","Kalrn","A2CG49","1.066","Mus musculus (Mouse)","10090","Kalirin (EC 2.7.11.1) (Protein Duo) (Serine/threonine-protein kinase with Dbl- and pleckstrin homology domain)","false","reviewed","1_1"
"8762","Synaptic Vesicle","0.982","1","Rab2a Rab2","Rab2a","P53994","0.958","Mus musculus (Mouse)","10090","Ras-related protein Rab-2A","false","reviewed","1_6"
"8763","Cytoskeleton","1.009","1","Coro1a Coro1","Coro1a","O89053","1.018","Mus musculus (Mouse)","10090","Coronin-1A (Coronin-like protein A) (Clipin-A) (Coronin-like protein p57) (Tryptophan aspartate-containing coat protein) (TACO)","false","reviewed","1_5"
"8764","Signaling Cascade","0.984","1","Lgi1","Lgi1","Q9JIA1","0.977","Mus musculus (Mouse)","10090","Leucine-rich glioma-inactivated protein 1","false","reviewed","1_1"
"8765","Mitochondrion","0.991","3","Cisd1 D10Ertd214e Zcd1","Cisd1","Q91WS0","1.047","Mus musculus (Mouse)","10090","CDGSH iron-sulfur domain-containing protein 1 (MitoNEET)","false","reviewed","3_1"
"8766","Synaptic Vesicle","0.954","1","Stxbp5 Kiaa4253 Llgl3","Stxbp5","Q8K400","0.989","Mus musculus (Mouse)","10090","Syntaxin-binding protein 5 (Lethal(2) giant larvae protein homolog 3) (Tomosyn-1)","false","reviewed","1_3"
"8767","Synaptic Vesicle","0.843","1","Sncb","Sncb","Q91ZZ3","0.636","Mus musculus (Mouse)","10090","Beta-synuclein","false","reviewed","1_2"
"8768","Plasma Membrane","0.923","1","Gpc1","Gpc1","Q9QZF2","1.015","Mus musculus (Mouse)","10090","Glypican-1 [Cleaved into: Secreted glypican-1]","false","reviewed","1_2"
"8769","Signaling Cascade","1.095","1","Srgap3 Arhgap14 Kiaa0411 Srgap2","Srgap3","Q812A2","1.043","Mus musculus (Mouse)","10090","SLIT-ROBO Rho GTPase-activating protein 3 (srGAP3) (Rho GTPase-activating protein 14) (WAVE-associated Rac GTPase-activating protein) (WRP)","false","reviewed","1_4"
"8770","Signaling Cascade","1.02","2","Ncdn Kiaa0607 Sfap75","Ncdn","Q9Z0E0","0.925","Mus musculus (Mouse)","10090","Neurochondrin (M-Sema F-associating protein of 75 kDa) (Norbin)","false","reviewed","2_1"
"8771","Mitochondrion","0.908","2","Oxr1 C7 Gm1238","Oxr1","Q4KMM3","1.011","Mus musculus (Mouse)","10090","Oxidation resistance protein 1 (Protein C7)","false","reviewed","2_1"
"8772","Plasma Membrane","0.933","2","Necap1","Necap1","Q9CR95","0.957","Mus musculus (Mouse)","10090","Adaptin ear-binding coat-associated protein 1 (NECAP endocytosis-associated protein 1) (NECAP-1)","false","reviewed","2_3"
"8773","Signaling Cascade","1.053","1","Csnk2a1 Ckiia","Csnk2a1","Q60737","1.008","Mus musculus (Mouse)","10090","Casein kinase II subunit alpha (CK II alpha) (EC 2.7.11.1)","false","reviewed","1_10"
"8774","Synaptic Vesicle","1.064","1","Ptprn2","Ptprn2","P80560","0.97","Mus musculus (Mouse)","10090","Receptor-type tyrosine-protein phosphatase N2 (R-PTP-N2) (EC 3.1.3.48) (PTP IA-2beta) (Protein tyrosine phosphatase-NP) (PTP-NP)","false","reviewed","1_5"
"8775","Plasma Membrane","0.901","1","Gpm6a M6a","Gpm6a","P35802","0.834","Mus musculus (Mouse)","10090","Neuronal membrane glycoprotein M6-a (M6a)","false","reviewed","1_3"
"8776","Signaling Cascade","1.064","1","Rapgef4 Cgef2 Epac2","Rapgef4","Q9EQZ6","1.012","Mus musculus (Mouse)","10090","Rap guanine nucleotide exchange factor 4 (Exchange factor directly activated by cAMP 2) (Exchange protein directly activated by cAMP 2) (EPAC 2) (cAMP-dependent Rap1 guanine-nucleotide exchange factor) (cAMP-regulated guanine nucleotide exchange factor II) (cAMP-GEFII)","false","reviewed","1_12"
"8777","Cytoplasm","1.009","1","Cryab Crya2","Cryab","P23927","0.918","Mus musculus (Mouse)","10090","Alpha-crystallin B chain (Alpha(B)-crystallin) (P23)","false","reviewed","1_5"
"8778","Synaptic Vesicle","0.932","1","Pclo Acz","Pclo","Q9QYX7","1.053","Mus musculus (Mouse)","10090","Protein piccolo (Aczonin) (Brain-derived HLMN protein) (Multidomain presynaptic cytomatrix protein)","false","reviewed","1_12"
"8779","Plasma Membrane","0.929","1","Epha4 Sek Sek1","Epha4","Q03137","1.059","Mus musculus (Mouse)","10090","Ephrin type-A receptor 4 (EC 2.7.10.1) (Tyrosine-protein kinase receptor MPK-3) (Tyrosine-protein kinase receptor SEK-1)","false","reviewed","1_5"
"8780","Cytoskeleton","0.806","1","Tpm1 Tpm-1 Tpma","Tpm1","P58771","0.867","Mus musculus (Mouse)","10090","Tropomyosin alpha-1 chain (Alpha-tropomyosin) (Tropomyosin-1)","false","reviewed","1_5"
"8781","Plasma Membrane","0.901","1","Cacng8","Cacng8","Q8VHW2","1.075","Mus musculus (Mouse)","10090","Voltage-dependent calcium channel gamma-8 subunit (Neuronal voltage-gated calcium channel gamma-8 subunit) (Transmembrane AMPAR regulatory protein gamma-8) (TARP gamma-8)","false","reviewed","1_3"
"8782","Synaptic Vesicle","1.056","2","Ap3d1 Ap3d","Ap3d1","O54774","1.0","Mus musculus (Mouse)","10090","AP-3 complex subunit delta-1 (AP-3 complex subunit delta) (Adaptor-related protein complex 3 subunit delta-1) (Delta-adaptin) (mBLVR1)","false","reviewed","2_3"
"8783","Plasma Membrane","1.064","3","Cyb5r1 Nqo3a2","Cyb5r1","Q9DB73","1.044","Mus musculus (Mouse)","10090","NADH-cytochrome b5 reductase 1 (b5R.1) (EC 1.6.2.2) (NAD(P)H:quinone oxidoreductase type 3 polypeptide A2)","false","reviewed","3_2"
"8784","Cytoskeleton","1.008","1","Wdr1","Wdr1","O88342","0.967","Mus musculus (Mouse)","10090","WD repeat-containing protein 1 (Actin-interacting protein 1) (AIP1)","false","reviewed","1_8"
"8785","Cytoplasm","0.833","4","Dstn Dsn Sid23","Dstn","Q9R0P5","0.972","Mus musculus (Mouse)","10090","Destrin (Actin-depolymerizing factor) (ADF) (Sid 23)","false","reviewed","4_2"
"8786","Plasma Membrane","1.004","1","Adam11 Mdc","Adam11","Q9R1V4","1.068","Mus musculus (Mouse)","10090","Disintegrin and metalloproteinase domain-containing protein 11 (ADAM 11) (Metalloproteinase-like, disintegrin-like, and cysteine-rich protein) (MDC)","false","reviewed","1_1"
"8787","Synaptic Vesicle","1.065","1","Cpe","Cpe","Q00493","0.967","Mus musculus (Mouse)","10090","Carboxypeptidase E (CPE) (EC 3.4.17.10) (Carboxypeptidase H) (CPH) (Enkephalin convertase) (Prohormone-processing carboxypeptidase)","false","reviewed","1_2"
