# Supplementary material for: APP Is a Context-Sensitive Regulator of the Hippocampal Presynaptic Active Zone
Source: PLOS journal article supplement (doi:10.1371/journal.pcbi.1004832), 2016-04-19
Supplement: S6 (10.1371/journal.pcbi.1004832.s006) [file journal.pcbi.1004832.s006.cys › CytoscapeSession-2016_01_22-10_07/tables/12178-Core+Network+Localization/SHARED_ATTRS-org.cytoscape.model.CyEdge-12178+shared+edge.cytable]

CyCSV-Version	1
SUID	shared interaction	shared name
java.lang.Long	java.lang.String	java.lang.String
12178 shared edge
16208	pp	Q00493 (pp) P12023
16207	pp	Q9R1V4 (pp) Q9JIA1
16206	pp	O88342 (pp) P18760
16205	pp	O88342 (pp) P47757
16204	pp	O88342 (pp) Q9CVB6
16203	pp	Q9DB73 (pp) Q91VR2
16202	pp	O54774 (pp) Q68FD5
16201	pp	Q8VHW2 (pp) P23819
16200	pp	P58771 (pp) P16054
16199	pp	Q03137 (pp) P39688
16198	pp	Q9QYX7 (pp) Q9EQZ6
16197	pp	P23927 (pp) P16054
16196	pp	P80560 (pp) P18052
16195	pp	Q9CR95 (pp) P17427
16194	pp	Q4KMM3 (pp) P50516
16193	pp	Q9QZF2 (pp) P12023
16192	pp	Q91WS0 (pp) Q9CQH3
16191	pp	Q9JIA1 (pp) Q01097
16190	pp	P53994 (pp) Q61598
16189	pp	D3YVF0 (pp) P48453
16188	pp	D3YVF0 (pp) P35438
16187	pp	Q9ES97 (pp) Q99P72
16186	pp	Q9ES97 (pp) Q8K0T0
16185	pp	Q9R1V7 (pp) Q9JIA1
16184	pp	Q9R1V7 (pp) P04925
16183	pp	Q9D6K5 (pp) Q8CHC4
16182	pp	Q9CYT6 (pp) P40124
16181	pp	Q04447 (pp) P63017
16180	pp	Q9Z2W9 (pp) P23819
16179	pp	Q63810 (pp) P48453
16178	pp	Q61330 (pp) B9EKR1
16177	pp	Q8K0T0 (pp) P50516
16176	pp	Q8K0T0 (pp) Q01097
16175	pp	Q9ERD7 (pp) P47757
16174	pp	Q921J2 (pp) P63101
16173	pp	Q9CQW1 (pp) P46460
16172	pp	Q6P9K9 (pp) Q8BYM5
16171	pp	Q6P9K9 (pp) O70589
16170	pp	Q9CZW5 (pp) P63038
16169	pp	Q9CZW5 (pp) Q6PB66
16168	pp	P20152 (pp) P16054
16167	pp	Q8BRT1 (pp) P28740
16166	pp	Q921M7 (pp) P68510
16165	pp	Q8R366 (pp) P04925
16164	pp	Q61206 (pp) P63005
16163	pp	Q03157 (pp) P12023
16162	pp	Q03157 (pp) Q9Z268
16161	pp	Q03157 (pp) Q9QXJ1
16160	pp	Q03157 (pp) P04925
16159	pp	Q8R5C5 (pp) P50516
16158	pp	Q91VT4 (pp) Q8QZT1
16157	pp	Q91VT4 (pp) Q9CR68
16156	pp	Q91VT4 (pp) Q99LC5
16155	pp	Q3THE2 (pp) Q01097
16154	pp	Q3THE2 (pp) P68510
16153	pp	Q920P5 (pp) P63101
16152	pp	Q2PFD7 (pp) P63101
16151	pp	Q7TMM9 (pp) P60879
16150	pp	Q7TMM9 (pp) P63101
16149	pp	Q91VR7 (pp) P14873
16148	pp	Q9CR62 (pp) Q9DC69
16147	pp	Q9CR62 (pp) Q9CZ13
16146	pp	Q8CHH9 (pp) P50516
16145	pp	P97300 (pp) Q99P72
16144	pp	O08917 (pp) Q60634
16143	pp	Q61316 (pp) Q60864
16142	pp	Q9D1T0 (pp) P12023
16141	pp	P11798 (pp) P35438
16140	pp	P11798 (pp) P63101
16139	pp	P11798 (pp) Q01097
16138	pp	P11798 (pp) P35436
16137	pp	P11798 (pp) P28652
16136	pp	P11798 (pp) O88935
16135	pp	P11798 (pp) Q9WU78
16134	pp	Q8K183 (pp) P63330
16133	pp	Q99NE5 (pp) Q9EQZ6
16132	pp	P57780 (pp) P09103
16131	pp	P57780 (pp) P50516
16130	pp	Q9QY76 (pp) O35526
16129	pp	Q9QY76 (pp) O08788
16128	pp	Q9QY76 (pp) P61264
16127	pp	Q9R1V6 (pp) Q9JIA1
16126	pp	Q9R1V6 (pp) Q01097
16125	pp	P48758 (pp) P62259
16124	pp	Q91XV3 (pp) P06837
16123	pp	Q91XV3 (pp) P60761
16122	pp	Q91XV3 (pp) P26645
16121	pp	Q91XV3 (pp) P68510
16120	pp	P55302 (pp) Q91ZX7
16119	pp	O88643 (pp) P60766
16118	pp	O88643 (pp) Q68FF6
16117	pp	O88643 (pp) Q61735
16116	pp	O88643 (pp) P63001
16115	pp	Q80TZ3 (pp) P50516
16114	pp	Q80TZ3 (pp) O08585
16113	pp	Q7TMB8 (pp) Q9JJV2
16112	pp	Q7TMB8 (pp) P28660
16111	pp	Q9WV55 (pp) Q62442
16110	pp	Q9WV55 (pp) Q9QY76
16109	pp	Q9WV55 (pp) P60879
16108	pp	Q9WV55 (pp) P63044
16107	pp	O55131 (pp) P42208
16106	pp	O35136 (pp) P11627
16105	pp	P12960 (pp) P04925
16104	pp	P12960 (pp) P11627
16103	pp	P12960 (pp) B9EKR1
16102	pp	Q61699 (pp) P68369
16101	pp	P08553 (pp) P46660
16100	pp	P08553 (pp) P19246
16099	pp	Q8K4Z3 (pp) Q9CZ42
16098	pp	Q8K4Z3 (pp) Q9Z1P6
16097	pp	P08551 (pp) P19246
16096	pp	P08551 (pp) P63101
16095	pp	Q8VDQ8 (pp) Q9DC69
16094	pp	O54983 (pp) Q8VDQ8
16093	pp	P18760 (pp) P40124
16092	pp	Q9Z2Q6 (pp) O55131
16091	pp	Q9Z2Q6 (pp) P42208
16090	pp	Q9WV34 (pp) Q01097
16089	pp	P28661 (pp) P42208
16088	pp	P26645 (pp) P63318
16087	pp	P84096 (pp) Q5FWK3
16086	pp	O35143 (pp) Q91VR2
16085	pp	O35143 (pp) Q9D3D9
16084	pp	P63321 (pp) P35438
16083	pp	Q8K021 (pp) Q62277
16082	pp	Q8CI94 (pp) Q9D0F9
16081	pp	Q8CI94 (pp) Q91ZJ5
16080	pp	Q8CI94 (pp) P50516
16079	pp	P48962 (pp) Q60931
16078	pp	P43406 (pp) Q71LX4
16077	pp	O35857 (pp) P17156
16076	pp	O35857 (pp) P62073
16075	pp	O35857 (pp) O35129
16074	pp	O35857 (pp) P38647
16073	pp	O35857 (pp) Q9D880
16072	pp	Q61490 (pp) P01831
16071	pp	Q9CZ42 (pp) P61922
16070	pp	P35564 (pp) P09103
16069	pp	P19096 (pp) Q9DCD0
16068	pp	P19096 (pp) Q64521
16067	pp	P19096 (pp) Q05920
16066	pp	Q61644 (pp) P39053
16065	pp	Q61644 (pp) Q8CHC4
16064	pp	Q61644 (pp) P10637
16063	pp	Q8BZ98 (pp) Q60631
16062	pp	Q8BZ98 (pp) Q60598
16061	pp	Q8BZ98 (pp) Q61644
16060	pp	Q5RJI5 (pp) P62259
16059	pp	P61164 (pp) P62259
16058	pp	Q8R191 (pp) Q62277
16057	pp	Q8R191 (pp) P50516
16056	pp	O35643 (pp) O08585
16055	pp	O35643 (pp) Q80TZ3
16054	pp	O35643 (pp) Q60631
16053	pp	Q99P72 (pp) Q9D1T0
16052	pp	Q99P72 (pp) P48722
16051	pp	Q60930 (pp) P48962
16050	pp	Q60930 (pp) Q9WUM5
16049	pp	Q60930 (pp) Q01097
16048	pp	Q60930 (pp) Q9CR68
16047	pp	P20444 (pp) P26645
16046	pp	Q9QXS1 (pp) P63101
16045	pp	Q9QXS1 (pp) Q64010
16044	pp	O08599 (pp) P16546
16043	pp	O08599 (pp) P61264
16042	pp	Q8BW75 (pp) Q9CZS1
16041	pp	Q8BW75 (pp) Q9DBF1
16040	pp	O35239 (pp) P46460
16039	pp	Q9EPJ9 (pp) P62331
16038	pp	P00405 (pp) Q6PB66
16037	pp	P00405 (pp) P03930
16036	pp	P56564 (pp) P28661
16035	pp	P56564 (pp) P63101
16034	pp	P63318 (pp) P35438
16033	pp	P58281 (pp) Q8K1M6
16032	pp	Q8R3V5 (pp) Q8CHC4
16031	pp	P67871 (pp) Q60737
16030	pp	Q810U3 (pp) Q8C8R3
16029	pp	P62743 (pp) O08585
16028	pp	Q60605 (pp) Q01097
16027	pp	P35279 (pp) Q61598
16026	pp	Q9CRB9 (pp) P16054
16025	pp	Q9CQI6 (pp) P60710
16024	pp	P50396 (pp) P63011
16023	pp	P50396 (pp) Q99PT1
16022	pp	P50396 (pp) P07901
16021	pp	P50396 (pp) P62821
16020	pp	Q9WU78 (pp) Q62419
16019	pp	Q9WU78 (pp) Q60631
16018	pp	Q9WU78 (pp) P05480
16017	pp	Q9WU78 (pp) Q62420
16016	pp	P0C0A3 (pp) Q9D8B3
16015	pp	P0C0A3 (pp) Q9WU78
16014	pp	Q9R0P9 (pp) O55042
16013	pp	Q9R0P9 (pp) Q99LX0
16012	pp	Q9R0P9 (pp) P68369
16011	pp	Q80UU9 (pp) P68510
16010	pp	Q60875 (pp) P84096
16009	pp	Q60875 (pp) Q8BG51
16008	pp	Q61411 (pp) P63038
16007	pp	Q61411 (pp) P35438
16006	pp	Q8CHC4 (pp) P50516
16005	pp	Q8CHC4 (pp) Q62420
16004	pp	Q91VZ6 (pp) Q68FD5
16003	pp	Q9WUB3 (pp) P47857
16002	pp	Q9WUB3 (pp) Q9D0F9
16001	pp	Q9WUB3 (pp) Q91ZJ5
16000	pp	Q9D0F9 (pp) Q91ZJ5
15999	pp	Q9D0F9 (pp) P17710
15998	pp	Q6PIC6 (pp) P04925
15997	pp	Q6PIC6 (pp) Q01097
15996	pp	Q80VP1 (pp) Q9Z0R4
15995	pp	P68181 (pp) P63101
15994	pp	P68181 (pp) P35438
15993	pp	P68181 (pp) P12367
15992	pp	P28663 (pp) P46460
15991	pp	P41216 (pp) Q99JY0
15990	pp	Q9D6F9 (pp) P50516
15989	pp	Q99MR8 (pp) Q99MN9
15988	pp	Q8BH04 (pp) P17182
15987	pp	Q8BH04 (pp) Q05920
15986	pp	Q8BWF0 (pp) Q05920
15985	pp	Q8BWF0 (pp) P61922
15984	pp	Q8BWF0 (pp) P70404
15983	pp	Q8BWF0 (pp) Q60597
15982	pp	Q91WC3 (pp) P50516
15981	pp	Q3UVX5 (pp) P35438
15980	pp	Q3UVX5 (pp) P62204
15979	pp	Q3UVX5 (pp) P04925
15978	pp	P20357 (pp) P14873
15977	pp	P20357 (pp) P12367
15976	pp	P20357 (pp) O88935
15975	pp	P20357 (pp) Q9ERD7
15974	pp	P20357 (pp) P11798
15973	pp	P20357 (pp) Q6PHZ2
15972	pp	P20357 (pp) P35438
15971	pp	Q9D8B3 (pp) Q9WU78
15970	pp	O55042 (pp) O35526
15969	pp	P63328 (pp) P63137
15968	pp	P63328 (pp) Q63810
15967	pp	P63328 (pp) O35465
15966	pp	P63328 (pp) P35438
15965	pp	P63328 (pp) P22723
15964	pp	Q62419 (pp) Q9D8B3
15963	pp	Q62419 (pp) P39053
15962	pp	Q62419 (pp) Q7TQF7
15961	pp	P45376 (pp) P16054
15960	pp	O54991 (pp) Q99P72
15959	pp	B9EKR1 (pp) O54991
15958	pp	Q9QYR6 (pp) Q91VR7
15957	pp	O08585 (pp) Q80VP1
15956	pp	O08585 (pp) Q91VR2
15955	pp	Q60932 (pp) P48962
15954	pp	Q60932 (pp) Q01097
15953	pp	Q60932 (pp) P16054
15952	pp	Q60932 (pp) P17710
15951	pp	Q60932 (pp) Q99LX0
15950	pp	Q3UHL1 (pp) P60761
15949	pp	Q3UHL1 (pp) P63101
15948	pp	Q9CPQ1 (pp) P56391
15947	pp	Q9CPQ1 (pp) P00405
15946	pp	Q9CPQ1 (pp) Q9D855
15945	pp	Q9CPQ1 (pp) Q9DB20
15944	pp	Q9CPQ1 (pp) Q9CQZ5
15943	pp	Q9CPQ1 (pp) P43024
15942	pp	Q9CPQ1 (pp) P56379
15941	pp	Q9CPQ1 (pp) Q9CQH3
15940	pp	Q9CPQ1 (pp) Q9CQQ7
15939	pp	Q9CPQ1 (pp) Q9CQZ6
15938	pp	Q9CPQ1 (pp) Q9D3D9
15937	pp	Q9CPQ1 (pp) Q99LY9
15936	pp	Q9CPQ1 (pp) P97450
15935	pp	Q9CPQ1 (pp) Q9CQJ8
15934	pp	Q9CPQ1 (pp) Q9DB77
15933	pp	Q9CPQ1 (pp) P17665
15932	pp	Q9CPQ1 (pp) P48771
15931	pp	Q9CPQ1 (pp) Q9CPP6
15930	pp	Q9CPQ1 (pp) Q9CQ69
15929	pp	Q9CPQ1 (pp) Q9DCX2
15928	pp	Q9CPQ1 (pp) Q9D6J6
15927	pp	Q9CPQ1 (pp) Q03265
15926	pp	Q9CPQ1 (pp) P19783
15925	pp	Q9CPQ1 (pp) Q06185
15924	pp	Q9CPQ1 (pp) Q91VR2
15923	pp	Q9CPQ1 (pp) Q9ERS2
15922	pp	Q5SQX6 (pp) P28660
15921	pp	Q80Y14 (pp) Q99KI0
15920	pp	Q80Y14 (pp) Q99KB8
15919	pp	Q80Y14 (pp) Q9DCB8
15918	pp	Q80Y14 (pp) P99029
15917	pp	Q9Z0R4 (pp) P50516
15916	pp	Q9Z0R4 (pp) P39053
15915	pp	P00493 (pp) P04925
15914	pp	P00493 (pp) Q9R0Y5
15913	pp	P00493 (pp) P06151
15912	pp	P00493 (pp) P17742
15911	pp	P00493 (pp) P52480
15910	pp	P00493 (pp) Q9R111
15909	pp	P00493 (pp) Q99LC5
15908	pp	P60761 (pp) P06837
15907	pp	Q64332 (pp) P46460
15906	pp	Q64332 (pp) Q9JJV2
15905	pp	Q64332 (pp) P62259
15904	pp	Q64332 (pp) P60761
15903	pp	O70318 (pp) O70589
15902	pp	O70318 (pp) P63001
15901	pp	O08539 (pp) Q8BZ98
15900	pp	O08539 (pp) Q8R3V5
15899	pp	O08539 (pp) P10637
15898	pp	Q9CS84 (pp) O70589
15897	pp	Q9CS84 (pp) O88952
15896	pp	Q9CS84 (pp) Q8BYM5
15895	pp	Q9JIS5 (pp) Q68FF6
15894	pp	Q4ACU6 (pp) Q60631
15893	pp	Q4ACU6 (pp) Q8BYM5
15892	pp	P48453 (pp) P63328
15891	pp	P48453 (pp) P62204
15890	pp	P48453 (pp) P63101
15889	pp	Q925I1 (pp) O35658
15888	pp	Q62261 (pp) P13595
15887	pp	Q62261 (pp) Q810U4
15886	pp	Q62261 (pp) P16546
15885	pp	Q62261 (pp) Q01097
15884	pp	Q62261 (pp) P35438
15883	pp	Q62261 (pp) P63101
15882	pp	Q9R0N7 (pp) Q9Z0P4
15881	pp	Q9R0N7 (pp) P60879
15880	pp	P30999 (pp) Q60598
15879	pp	P30999 (pp) P35438
15878	pp	P30999 (pp) Q02248
15877	pp	Q68FF6 (pp) P62204
15876	pp	Q68FF6 (pp) B9EKR1
15875	pp	Q68FF6 (pp) P63101
15874	pp	P23818 (pp) P23819
15873	pp	P23818 (pp) Q3UVX5
15872	pp	P23818 (pp) P35438
15871	pp	P23818 (pp) P35436
15870	pp	Q9DBJ1 (pp) P52480
15869	pp	Q9DBJ1 (pp) P17182
15868	pp	Q9DBJ1 (pp) P17751
15867	pp	Q9DBJ1 (pp) Q99K85
15866	pp	Q9DBJ1 (pp) P06745
15865	pp	Q9DBJ1 (pp) P09411
15864	pp	Q9DBJ1 (pp) Q93092
15863	pp	P68254 (pp) P10637
15862	pp	P62204 (pp) P63101
15861	pp	P62204 (pp) O70589
15860	pp	P62204 (pp) P63328
15859	pp	P62204 (pp) P35438
15858	pp	Q99K85 (pp) O88712
15857	pp	Q99K85 (pp) Q91Z53
15856	pp	P28652 (pp) Q01097
15855	pp	P28652 (pp) Q6PHZ2
15854	pp	P28652 (pp) P35436
15853	pp	P28652 (pp) P23819
15852	pp	Q6PIE5 (pp) P70414
15851	pp	P47802 (pp) O88441
15850	pp	Q9R0Y5 (pp) Q9DCD0
15849	pp	Q9QXJ1 (pp) P12023
15848	pp	Q9QXJ1 (pp) P04925
15847	pp	P84091 (pp) Q9DBG3
15846	pp	P84091 (pp) Q6IRU5
15845	pp	P84091 (pp) P62743
15844	pp	P84091 (pp) Q80VP1
15843	pp	P84091 (pp) O08585
15842	pp	P84091 (pp) Q68FD5
15841	pp	P84091 (pp) P50516
15840	pp	P84091 (pp) P17426
15839	pp	P99024 (pp) P60879
15838	pp	P99024 (pp) Q6PER3
15837	pp	P99024 (pp) O70589
15836	pp	P03995 (pp) P63101
15835	pp	P03995 (pp) Q9QXS1
15834	pp	O70589 (pp) O88935
15833	pp	O70589 (pp) O08599
15832	pp	O70589 (pp) P60469
15831	pp	O70589 (pp) P16330
15830	pp	Q8BKX1 (pp) P28660
15829	pp	Q8BKX1 (pp) P62259
15828	pp	P13595 (pp) P16546
15827	pp	P13595 (pp) P04925
15826	pp	P13595 (pp) Q9CQV8
15825	pp	P11627 (pp) P13595
15824	pp	P62746 (pp) P63330
15823	pp	P62746 (pp) Q5FWK3
15822	pp	P62746 (pp) Q8BG51
15821	pp	Q8VD37 (pp) P17426
15820	pp	Q8VD37 (pp) P35564
15819	pp	Q8VD37 (pp) Q62420
15818	pp	Q8QZT1 (pp) Q99LC5
15817	pp	Q8QZT1 (pp) Q8BMF4
15816	pp	Q8QZT1 (pp) Q8BWT1
15815	pp	Q8QZT1 (pp) Q9DBL1
15814	pp	Q8QZT1 (pp) Q9D0K2
15813	pp	Q8QZT1 (pp) O08756
15812	pp	Q8QZT1 (pp) Q99JY0
15811	pp	Q8QZT1 (pp) Q9WUM5
15810	pp	Q8QZT1 (pp) Q9D2G2
15809	pp	Q8QZT1 (pp) Q8BMS1
15808	pp	Q60931 (pp) Q9CQH3
15807	pp	Q60931 (pp) Q9D6J6
15806	pp	Q9JLZ3 (pp) Q99MR8
15805	pp	Q9JLZ3 (pp) Q8BH95
15804	pp	Q9JLZ3 (pp) Q9JLJ2
15803	pp	Q9JLZ3 (pp) Q61425
15802	pp	Q9JLZ3 (pp) Q3ULD5
15801	pp	Q8VDP6 (pp) O55023
15800	pp	Q8VDP6 (pp) P63082
15799	pp	Q8VDP6 (pp) Q9Z1B3
15798	pp	Q8VDP6 (pp) Q99L43
15797	pp	Q9Z0X1 (pp) P17742
15796	pp	Q9Z0X1 (pp) Q8K1M6
15795	pp	Q60598 (pp) Q9JM76
15794	pp	Q60598 (pp) Q5FWK3
15793	pp	Q60598 (pp) P23819
15792	pp	Q60598 (pp) P59999
15791	pp	Q60598 (pp) P63085
15790	pp	Q60598 (pp) Q01097
15789	pp	Q60598 (pp) P35438
15788	pp	Q60598 (pp) Q9CVB6
15787	pp	Q60598 (pp) Q80Z38
15786	pp	Q60598 (pp) P05480
15785	pp	Q60598 (pp) P61161
15784	pp	P63011 (pp) P47708
15783	pp	P63011 (pp) P35438
15782	pp	P63011 (pp) Q99NE5
15781	pp	P38647 (pp) Q60864
15780	pp	P38647 (pp) Q8JZQ2
15779	pp	P38647 (pp) P63038
15778	pp	P38647 (pp) Q9QYJ0
15777	pp	P38647 (pp) P63101
15776	pp	Q62425 (pp) Q9CQH3
15775	pp	Q62425 (pp) Q99LX0
15774	pp	Q62425 (pp) Q9CQ69
15773	pp	Q62425 (pp) P68510
15772	pp	Q62425 (pp) Q3UIU2
15771	pp	Q62425 (pp) P16054
15770	pp	Q62425 (pp) O09111
15769	pp	Q62425 (pp) Q9Z1P6
15768	pp	Q62425 (pp) Q9DCJ5
15767	pp	Q62425 (pp) Q9CQ54
15766	pp	Q62425 (pp) Q9DCS9
15765	pp	Q8BMF3 (pp) Q05920
15764	pp	Q8BMF3 (pp) P52480
15763	pp	Q8BMF3 (pp) P06151
15762	pp	Q9DCB8 (pp) Q9D6J6
15761	pp	Q9DCB8 (pp) Q99KI0
15760	pp	Q9DCB8 (pp) Q9Z1J3
15759	pp	O88712 (pp) Q62420
15758	pp	Q8BHL5 (pp) Q60631
15757	pp	Q9QXS6 (pp) P62259
15756	pp	P17183 (pp) P06745
15755	pp	P17183 (pp) P56480
15754	pp	P17183 (pp) Q93092
15753	pp	P17183 (pp) P52480
15752	pp	P17183 (pp) P09411
15751	pp	P17183 (pp) Q8BH04
15750	pp	P17183 (pp) P17751
15749	pp	P17183 (pp) P05063
15748	pp	P17183 (pp) Q9DBJ1
15747	pp	P17183 (pp) P05064
15746	pp	P17183 (pp) P40142
15745	pp	Q6IRU5 (pp) Q61548
15744	pp	Q6IRU5 (pp) P17426
15743	pp	Q6IRU5 (pp) P62743
15742	pp	Q9DBG3 (pp) Q80VP1
15741	pp	Q9DBG3 (pp) P60879
15740	pp	Q9DBG3 (pp) P62743
15739	pp	Q9DBG3 (pp) P63101
15738	pp	Q9DBG3 (pp) P17426
15737	pp	Q9DBG3 (pp) Q68FD5
15736	pp	Q9DBG3 (pp) O70161
15735	pp	Q9DBG3 (pp) O08585
15734	pp	Q9DBG3 (pp) Q6IRU5
15733	pp	P10637 (pp) Q99LX0
15732	pp	P10637 (pp) Q9D8Y0
15731	pp	P10637 (pp) Q9QXJ1
15730	pp	P10637 (pp) O55042
15729	pp	P10637 (pp) P04925
15728	pp	P10637 (pp) P12023
15727	pp	Q922R8 (pp) P12023
15726	pp	P47857 (pp) Q9R0Y5
15725	pp	P47857 (pp) P05063
15724	pp	P47857 (pp) P05064
15723	pp	P47857 (pp) P63101
15722	pp	Q62048 (pp) P63085
15721	pp	Q99104 (pp) P35438
15720	pp	Q99104 (pp) P63101
15719	pp	Q99104 (pp) P08551
15718	pp	Q99104 (pp) P03995
15717	pp	Q99104 (pp) Q01097
15716	pp	P60766 (pp) Q8BG51
15715	pp	P60766 (pp) Q5FWK3
15714	pp	P60766 (pp) Q99PT1
15713	pp	P60766 (pp) P63005
15712	pp	Q6R891 (pp) P63101
15711	pp	Q6R891 (pp) Q60875
15710	pp	Q6R891 (pp) Q62277
15709	pp	P62835 (pp) P35438
15708	pp	Q8BLK3 (pp) P04925
15707	pp	Q91ZX7 (pp) Q9D6K5
15706	pp	Q91ZX7 (pp) P12023
15705	pp	P08226 (pp) P20357
15704	pp	P08226 (pp) P10637
15703	pp	P08226 (pp) P12023
15702	pp	P08226 (pp) P04925
15701	pp	P08226 (pp) Q91ZX7
15700	pp	Q8R0S4 (pp) Q9D6F9
15699	pp	Q61290 (pp) Q8R0S4
15698	pp	P42125 (pp) Q99JY0
15697	pp	P42125 (pp) Q8K1Z0
15696	pp	P42125 (pp) Q8BH95
15695	pp	P42125 (pp) Q91YT0
15694	pp	P42125 (pp) Q9CQ62
15693	pp	P42125 (pp) O08756
15692	pp	P42125 (pp) Q9DCJ5
15691	pp	P42125 (pp) Q99LC5
15690	pp	P42125 (pp) P51174
15689	pp	P42125 (pp) Q61425
15688	pp	P42125 (pp) O09111
15687	pp	P42125 (pp) Q8BMS1
15686	pp	P42125 (pp) Q9JHI5
15685	pp	P42125 (pp) Q9Z1P6
15684	pp	Q8BGD5 (pp) P50544
15683	pp	Q9Z268 (pp) Q06335
15682	pp	P17182 (pp) Q9DCD0
15681	pp	P17182 (pp) Q9WUA3
15680	pp	P17182 (pp) P63101
15679	pp	Q9CPW4 (pp) Q9JM76
15678	pp	Q9CPW4 (pp) P59999
15677	pp	Q8BKZ9 (pp) P97807
15676	pp	Q8BKZ9 (pp) Q60597
15675	pp	Q8BKZ9 (pp) Q9D051
15674	pp	Q8BKZ9 (pp) Q922H2
15673	pp	Q8BKZ9 (pp) P35486
15672	pp	Q8BKZ9 (pp) Q8BMF4
15671	pp	P05063 (pp) P17182
15670	pp	P05063 (pp) Q91VR2
15669	pp	P05063 (pp) P17710
15668	pp	P05063 (pp) Q9WUA3
15667	pp	Q9WUA3 (pp) P63101
15666	pp	P61982 (pp) P35438
15665	pp	P61982 (pp) P10637
15664	pp	P61982 (pp) Q9DC28
15663	pp	P61982 (pp) P62259
15662	pp	P61982 (pp) P63101
15661	pp	P07901 (pp) Q61699
15660	pp	P07901 (pp) Q60864
15659	pp	P07901 (pp) Q9DC28
15658	pp	P07901 (pp) Q99KJ8
15657	pp	P07901 (pp) P63038
15656	pp	P07901 (pp) Q9CR16
15655	pp	P07901 (pp) P62259
15654	pp	P07901 (pp) P63037
15653	pp	P07901 (pp) P11499
15652	pp	P07901 (pp) P61982
15651	pp	P06837 (pp) P62204
15650	pp	P15116 (pp) P30999
15649	pp	P15116 (pp) P23242
15648	pp	P15116 (pp) P35438
15647	pp	P15116 (pp) Q02248
15646	pp	Q7TQF7 (pp) Q62420
15645	pp	Q7TQF7 (pp) Q8BZ98
15644	pp	Q7TQF7 (pp) Q9DBG3
15643	pp	Q7TQF7 (pp) P39053
15642	pp	Q7TQF7 (pp) Q8CHC4
15641	pp	Q7TQF7 (pp) Q9EP69
15640	pp	Q7TQF7 (pp) Q68FD5
15639	pp	Q7TQF7 (pp) P17427
15638	pp	Q99L47 (pp) P63038
15637	pp	P29758 (pp) P15105
15636	pp	P29758 (pp) P12023
15635	pp	Q8CHT0 (pp) P15105
15634	pp	Q8CHT0 (pp) Q9DBF1
15633	pp	Q8CHT0 (pp) P29758
15632	pp	P97772 (pp) P35438
15631	pp	P97772 (pp) Q3UHD9
15630	pp	P31324 (pp) P68181
15629	pp	P31324 (pp) P35438
15628	pp	P31324 (pp) P63101
15627	pp	P31324 (pp) P20357
15626	pp	P31324 (pp) P12367
15625	pp	P31324 (pp) Q8BR92
15624	pp	Q6PB66 (pp) P68510
15623	pp	P39053 (pp) Q8CHC4
15622	pp	P39053 (pp) Q9CQ92
15621	pp	P39053 (pp) O08539
15620	pp	P39053 (pp) P35438
15619	pp	P39053 (pp) P28740
15618	pp	P39053 (pp) P17426
15617	pp	P39053 (pp) Q68FD5
15616	pp	P39053 (pp) P04925
15615	pp	Q6PH08 (pp) Q99NE5
15614	pp	Q6PH08 (pp) P62259
15613	pp	O88737 (pp) Q99NE5
15612	pp	O88737 (pp) Q6PH08
15611	pp	Q9CQC7 (pp) Q9D6J6
15610	pp	Q9CQC7 (pp) Q9CQQ7
15609	pp	Q9CQC7 (pp) Q91YT0
15608	pp	Q9CQC7 (pp) Q9DCS9
15607	pp	Q9CQC7 (pp) Q3UIU2
15606	pp	Q9CQC7 (pp) Q99LC3
15605	pp	Q9CQC7 (pp) Q62425
15604	pp	Q9CQC7 (pp) Q99LY9
15603	pp	Q9CQC7 (pp) Q9D6J5
15602	pp	Q9CQC7 (pp) Q8K3J1
15601	pp	Q9CQC7 (pp) Q9CQH3
15600	pp	Q9CQC7 (pp) Q9DCJ5
15599	pp	Q9CQC7 (pp) Q9CQZ6
15598	pp	Q9CQC7 (pp) Q9DC69
15597	pp	Q9CQC7 (pp) Q9Z1P6
15596	pp	Q9CQC7 (pp) Q06185
15595	pp	Q9CQC7 (pp) Q9CQ54
15594	pp	Q9CVB6 (pp) P59999
15593	pp	Q9CVB6 (pp) P47757
15592	pp	Q9CVB6 (pp) Q9D898
15591	pp	Q9CVB6 (pp) Q99JY9
15590	pp	Q9CVB6 (pp) P60710
15589	pp	Q9CVB6 (pp) Q9R0Q6
15588	pp	Q9CVB6 (pp) P67871
15587	pp	Q9CVB6 (pp) Q9CPW4
15586	pp	Q9CVB6 (pp) Q9JM76
15585	pp	Q5FWK3 (pp) Q9QUI0
15584	pp	Q5FWK3 (pp) P63005
15583	pp	Q9WTT4 (pp) P63082
15582	pp	Q9WTT4 (pp) P50516
15581	pp	Q00612 (pp) P06745
15580	pp	Q00612 (pp) Q9DCD0
15579	pp	Q00612 (pp) P17751
15578	pp	Q00612 (pp) P97807
15577	pp	Q00612 (pp) P09671
15576	pp	Q00612 (pp) P40142
15575	pp	Q00612 (pp) Q93092
15574	pp	Q9D6J5 (pp) Q9CPQ8
15573	pp	Q9D6J5 (pp) Q91YT0
15572	pp	Q9D6J5 (pp) Q9DC69
15571	pp	Q9D6J5 (pp) Q9D3D9
15570	pp	Q9D6J5 (pp) Q9CQQ7
15569	pp	Q9D6J5 (pp) Q9CQZ6
15568	pp	Q9D6J5 (pp) O09111
15567	pp	Q9D6J5 (pp) Q9ERS2
15566	pp	Q9D6J5 (pp) Q9DCJ5
15565	pp	Q9D6J5 (pp) Q9CQ69
15564	pp	Q9D6J5 (pp) Q9DB77
15563	pp	Q9D6J5 (pp) Q99LC3
15562	pp	Q9D6J5 (pp) Q9DCS9
15561	pp	Q9D6J5 (pp) Q3UIU2
15560	pp	Q9D6J5 (pp) Q06185
15559	pp	Q9D6J5 (pp) Q9CZ13
15558	pp	Q9D6J5 (pp) Q9D6J6
15557	pp	Q9D6J5 (pp) Q8K3J1
15556	pp	Q9D6J5 (pp) Q99LX0
15555	pp	Q9D6J5 (pp) Q9CQH3
15554	pp	Q9D6J5 (pp) Q9Z1P6
15553	pp	Q9D6J5 (pp) Q9CQ54
15552	pp	Q9D6J5 (pp) Q91VD9
15551	pp	Q9D6J5 (pp) Q91VR2
15550	pp	P23506 (pp) Q9CQH3
15549	pp	Q6PCP5 (pp) P23506
15548	pp	Q8VDN2 (pp) P35438
15547	pp	Q8VDN2 (pp) P14094
15546	pp	Q8VDN2 (pp) Q01097
15545	pp	Q8VDN2 (pp) P63044
15544	pp	Q8VDN2 (pp) P70414
15543	pp	Q8VDN2 (pp) P60879
15542	pp	Q8VDN2 (pp) P23819
15541	pp	Q9QWI6 (pp) Q68FF6
15540	pp	Q9QWI6 (pp) P05480
15539	pp	Q9QWI6 (pp) Q8R001
15538	pp	P63101 (pp) Q64332
15537	pp	P63101 (pp) P10637
15536	pp	P63101 (pp) P20357
15535	pp	P63101 (pp) P08553
15534	pp	P63101 (pp) Q80U28
15533	pp	P63101 (pp) P17156
15532	pp	P63101 (pp) P47757
15531	pp	P63101 (pp) Q8BPN8
15530	pp	P63101 (pp) P16546
15529	pp	P63101 (pp) P13020
15528	pp	P63101 (pp) F6SEU4
15527	pp	P63101 (pp) Q60875
15526	pp	P63101 (pp) Q920I9
15525	pp	P63101 (pp) Q9R0K7
15524	pp	P63101 (pp) P30999
15523	pp	P63101 (pp) P60469
15522	pp	P63101 (pp) P12367
15521	pp	P63101 (pp) P16330
15520	pp	P63101 (pp) P28652
15519	pp	P63101 (pp) Q7TSJ2
15518	pp	P63101 (pp) Q925I1
15517	pp	P63101 (pp) P28740
15516	pp	P63101 (pp) P46660
15515	pp	P63101 (pp) O88935
15514	pp	P63101 (pp) Q62465
15513	pp	P63101 (pp) P63328
15512	pp	P63101 (pp) P62482
15511	pp	Q61879 (pp) P35438
15510	pp	Q61879 (pp) P63101
15509	pp	Q91ZA3 (pp) Q99JY0
15508	pp	Q91ZA3 (pp) Q9EQ20
15507	pp	Q3UMR5 (pp) P50516
15506	pp	P56382 (pp) Q03265
15505	pp	P56382 (pp) Q91VM9
15504	pp	P56382 (pp) Q91VR2
15503	pp	P56382 (pp) P56480
15502	pp	P56382 (pp) Q9D3D9
15501	pp	P56382 (pp) Q9CQZ5
15500	pp	P56382 (pp) P03930
15499	pp	P56382 (pp) Q9CQQ7
15498	pp	P56382 (pp) Q9DB20
15497	pp	P56382 (pp) Q99LX0
15496	pp	P56382 (pp) Q9DCX2
15495	pp	P56382 (pp) Q06185
15494	pp	P56382 (pp) P97450
15493	pp	P09103 (pp) Q922R8
15492	pp	P09103 (pp) P04925
15491	pp	P09103 (pp) P63038
15490	pp	P14873 (pp) Q9QYR6
15489	pp	P14873 (pp) P63005
15488	pp	P14873 (pp) P62259
15487	pp	P43024 (pp) Q9ERS2
15486	pp	P43024 (pp) P56391
15485	pp	P43024 (pp) Q9DCX2
15484	pp	P43024 (pp) Q9D3D9
15483	pp	P43024 (pp) P00405
15482	pp	P43024 (pp) Q91VR2
15481	pp	P43024 (pp) Q9CQ69
15480	pp	Q62420 (pp) P39053
15479	pp	Q62420 (pp) O08585
15478	pp	Q9EP69 (pp) Q8CHC4
15477	pp	Q9EP69 (pp) Q68FD5
15476	pp	Q9EP69 (pp) Q62420
15475	pp	P26040 (pp) P11627
15474	pp	P70441 (pp) P26040
15473	pp	P61264 (pp) P63044
15472	pp	Q7TPR4 (pp) Q2PFD7
15471	pp	Q3UTJ2 (pp) O08917
15470	pp	Q3UTJ2 (pp) Q7TPR4
15469	pp	P06745 (pp) P17710
15468	pp	P06745 (pp) P05063
15467	pp	P06745 (pp) P09411
15466	pp	P06745 (pp) P16858
15465	pp	P06745 (pp) P06151
15464	pp	P06745 (pp) Q9D0F9
15463	pp	P06745 (pp) Q9DCD0
15462	pp	P06745 (pp) P17182
15461	pp	P06745 (pp) O55023
15460	pp	P06745 (pp) P47857
15459	pp	P06745 (pp) Q05920
15458	pp	P06745 (pp) Q9WUM5
15457	pp	P06745 (pp) Q9WUA3
15456	pp	P06745 (pp) P05064
15455	pp	Q920I9 (pp) Q8BPN8
15454	pp	Q923T9 (pp) P63101
15453	pp	Q923T9 (pp) P35436
15452	pp	P63040 (pp) P63044
15451	pp	Q61831 (pp) Q01097
15450	pp	Q61831 (pp) P35438
15449	pp	P50544 (pp) Q8BMS1
15448	pp	P50544 (pp) Q91WC3
15447	pp	P50544 (pp) P41216
15446	pp	Q9Z2I9 (pp) Q99LC5
15445	pp	Q9Z2I9 (pp) P97807
15444	pp	Q9Z2I9 (pp) Q9D023
15443	pp	Q9Z2I9 (pp) Q9D2G2
15442	pp	Q9Z2I9 (pp) P50516
15441	pp	Q9Z2I9 (pp) Q8R4N0
15440	pp	Q9Z2I9 (pp) Q03265
15439	pp	Q9Z2I9 (pp) Q8CAQ8
15438	pp	Q9Z2I9 (pp) Q91VD9
15437	pp	Q9Z2I9 (pp) P23506
15436	pp	Q9Z2I9 (pp) Q9WUM5
15435	pp	Q9Z2I9 (pp) Q60597
15434	pp	Q61301 (pp) P15116
15433	pp	Q9DB05 (pp) P46460
15432	pp	P52480 (pp) P17710
15431	pp	P52480 (pp) P06745
15430	pp	P52480 (pp) P05064
15429	pp	P52480 (pp) Q05920
15428	pp	P52480 (pp) Q9WUB3
15427	pp	P52480 (pp) P06151
15426	pp	P52480 (pp) Q9DCD0
15425	pp	P52480 (pp) P09411
15424	pp	P52480 (pp) P05063
15423	pp	P52480 (pp) Q8BH04
15422	pp	P52480 (pp) Q9WUA3
15421	pp	P52480 (pp) P47857
15420	pp	P52480 (pp) Q9R0Y5
15419	pp	P52480 (pp) P17182
15418	pp	P52480 (pp) P54071
15417	pp	Q93092 (pp) P97807
15416	pp	Q93092 (pp) P05063
15415	pp	Q93092 (pp) P05064
15414	pp	Q93092 (pp) P06745
15413	pp	Q93092 (pp) Q9D0F9
15412	pp	Q93092 (pp) P17710
15411	pp	Q93092 (pp) Q9WUA3
15410	pp	Q93092 (pp) P17182
15409	pp	Q93092 (pp) Q9DCD0
15408	pp	Q93092 (pp) P06151
15407	pp	Q93092 (pp) P47857
15406	pp	Q93092 (pp) P52480
15405	pp	Q9JHI5 (pp) Q99LC5
15404	pp	Q9JHI5 (pp) Q61425
15403	pp	Q9JHI5 (pp) Q99MR8
15402	pp	Q9JHI5 (pp) Q8BMS1
15401	pp	P53395 (pp) Q9DBL1
15400	pp	P53395 (pp) Q3ULD5
15399	pp	P53395 (pp) Q9D051
15398	pp	P53395 (pp) Q99MN9
15397	pp	P53395 (pp) Q60597
15396	pp	P53395 (pp) Q8K2B3
15395	pp	P53395 (pp) P35486
15394	pp	P53395 (pp) Q9WUM5
15393	pp	P53395 (pp) O08749
15392	pp	P53395 (pp) Q9JHI5
15391	pp	Q9DBL1 (pp) Q8BMS1
15390	pp	Q9CQ92 (pp) Q8BZ98
15389	pp	Q9CQ92 (pp) Q6PCP5
15388	pp	Q9CQ92 (pp) Q8K1M6
15387	pp	Q8BPN8 (pp) Q5SQX6
15386	pp	Q8BPN8 (pp) P12382
15385	pp	Q8BPN8 (pp) Q9Z1G3
15384	pp	Q8BPN8 (pp) P63318
15383	pp	Q8BPN8 (pp) Q9WUA3
15382	pp	Q8BPN8 (pp) P28660
15381	pp	Q8BPN8 (pp) P70404
15380	pp	P18572 (pp) O35465
15379	pp	P09671 (pp) Q99KI0
15378	pp	P09671 (pp) Q9WUM5
15377	pp	P09671 (pp) Q03265
15376	pp	P09671 (pp) Q9QUH0
15375	pp	P09671 (pp) Q9CQA3
15374	pp	P09671 (pp) Q9CR68
15373	pp	P09671 (pp) P20108
15372	pp	P09671 (pp) Q9DCJ5
15371	pp	P09671 (pp) P97807
15370	pp	P09671 (pp) Q8K3J1
15369	pp	P09671 (pp) P17751
15368	pp	P09671 (pp) Q9D6J5
15367	pp	P09671 (pp) Q80Y14
15366	pp	P09671 (pp) Q64521
15365	pp	P09671 (pp) Q9D0M3
15364	pp	P09671 (pp) Q99LX0
15363	pp	P09671 (pp) P52503
15362	pp	P09671 (pp) Q91YT0
15361	pp	P09671 (pp) Q9DCD0
15360	pp	P09671 (pp) Q9DC69
15359	pp	P09671 (pp) P08249
15358	pp	P09671 (pp) Q9DC70
15357	pp	P09671 (pp) P63038
15356	pp	P09671 (pp) Q9CXZ1
15355	pp	P09671 (pp) O70325
15354	pp	P09671 (pp) Q9CQQ7
15353	pp	P09671 (pp) P99029
15352	pp	P09671 (pp) P06745
15351	pp	P09671 (pp) Q9D2G2
15350	pp	P09671 (pp) Q9CPP6
15349	pp	P09671 (pp) Q9D6J6
15348	pp	P09671 (pp) Q91VD9
15347	pp	P09671 (pp) P09411
15346	pp	P09671 (pp) Q9CQH3
15345	pp	P16054 (pp) P05480
15344	pp	P16054 (pp) P67778
15343	pp	P16054 (pp) P17182
15342	pp	P16054 (pp) Q9CQA3
15341	pp	P16054 (pp) Q9CQ62
15340	pp	P16054 (pp) Q9CQR4
15339	pp	P16054 (pp) P35438
15338	pp	P16054 (pp) Q99JY0
15337	pp	P16054 (pp) Q9CR62
15336	pp	P16054 (pp) P23242
15335	pp	P16054 (pp) P63038
15334	pp	P16054 (pp) P48962
15333	pp	P16054 (pp) O35643
15332	pp	P16054 (pp) Q8BMS1
15331	pp	P16054 (pp) P16858
15330	pp	P16054 (pp) P47757
15329	pp	P62962 (pp) P60710
15328	pp	P62962 (pp) P99024
15327	pp	P62962 (pp) P39053
15326	pp	P62962 (pp) P59999
15325	pp	P62962 (pp) Q9JJV2
15324	pp	P22315 (pp) Q9Z1J3
15323	pp	P22315 (pp) P63038
15322	pp	P22315 (pp) Q61102
15321	pp	P35486 (pp) Q8BMF4
15320	pp	P35486 (pp) Q05920
15319	pp	P35486 (pp) P06151
15318	pp	P35486 (pp) P09411
15317	pp	P35486 (pp) Q9D2G2
15316	pp	P35486 (pp) Q922H2
15315	pp	P35486 (pp) Q9DC69
15314	pp	P35486 (pp) P52480
15313	pp	P35486 (pp) P06745
15312	pp	P35486 (pp) Q9WUM5
15311	pp	P47754 (pp) P62259
15310	pp	P47754 (pp) P47757
15309	pp	P47754 (pp) P63101
15308	pp	P47754 (pp) P16054
15307	pp	P14094 (pp) P04925
15306	pp	Q99JY9 (pp) Q9JM76
15305	pp	Q99JY9 (pp) P59999
15304	pp	Q99JY9 (pp) Q60598
15303	pp	Q99JY9 (pp) Q8VDN2
15302	pp	Q99JY9 (pp) P14094
15301	pp	Q99MN9 (pp) Q05920
15300	pp	Q99MN9 (pp) Q99JY0
15299	pp	Q99MN9 (pp) Q8BWT1
15298	pp	Q99MN9 (pp) Q9WUM5
15297	pp	Q99MN9 (pp) Q91ZA3
15296	pp	Q99MN9 (pp) Q9EQ20
15295	pp	Q99PT1 (pp) P84096
15294	pp	Q99PT1 (pp) P26040
15293	pp	Q99PT1 (pp) P62746
15292	pp	Q99PT1 (pp) P63001
15291	pp	Q99PT1 (pp) O35465
15290	pp	Q99PT1 (pp) P56480
15289	pp	O88935 (pp) P39053
15288	pp	P97450 (pp) Q9Z1P6
15287	pp	P97450 (pp) P48771
15286	pp	P97450 (pp) P19783
15285	pp	P97450 (pp) Q8K3J1
15284	pp	P97450 (pp) Q9CQQ7
15283	pp	P97450 (pp) Q99LX0
15282	pp	P97450 (pp) Q9DC69
15281	pp	P97450 (pp) Q9DB20
15280	pp	P97450 (pp) P56391
15279	pp	P97450 (pp) Q9DCJ5
15278	pp	P97450 (pp) Q9D023
15277	pp	P97450 (pp) Q91VD9
15276	pp	P97450 (pp) P56480
15275	pp	P97450 (pp) Q9CPP6
15274	pp	P97450 (pp) Q9CQ54
15273	pp	P97450 (pp) O09111
15272	pp	P97450 (pp) Q9CQ69
15271	pp	P97450 (pp) Q9CQH3
15270	pp	P97450 (pp) P19536
15269	pp	P97450 (pp) Q8VEM8
15268	pp	P97450 (pp) Q9CPQ8
15267	pp	P97450 (pp) Q9CR68
15266	pp	P97450 (pp) Q91YT0
15265	pp	P97450 (pp) Q3UIU2
15264	pp	P97450 (pp) Q9D6J5
15263	pp	P97450 (pp) Q99LC5
15262	pp	P97450 (pp) O88441
15261	pp	P97450 (pp) Q9WUM5
15260	pp	P97450 (pp) Q9D3D9
15259	pp	P97450 (pp) Q60931
15258	pp	P97450 (pp) Q9D6J6
15257	pp	P97450 (pp) O35658
15256	pp	P97450 (pp) Q91VR2
15255	pp	P97450 (pp) Q9DCX2
15254	pp	P97450 (pp) Q06185
15253	pp	P97450 (pp) Q9DB77
15252	pp	P97450 (pp) Q9ERS2
15251	pp	P97450 (pp) P03930
15250	pp	P97450 (pp) Q9CQZ6
15249	pp	P97450 (pp) Q03265
15248	pp	P97450 (pp) Q99LY9
15247	pp	P97450 (pp) Q9DCS9
15246	pp	P97450 (pp) Q91VM9
15245	pp	Q64010 (pp) P68510
15244	pp	Q64010 (pp) P68254
15243	pp	Q64010 (pp) P61982
15242	pp	Q64010 (pp) P62259
15241	pp	Q64010 (pp) P63101
15240	pp	Q64010 (pp) P05480
15239	pp	P20108 (pp) P63038
15238	pp	P20108 (pp) Q9WUM5
15237	pp	P20108 (pp) Q99LC5
15236	pp	P20108 (pp) Q9DB77
15235	pp	Q9QUH0 (pp) O70325
15234	pp	Q9QUH0 (pp) P99029
15233	pp	Q9QUH0 (pp) P20108
15232	pp	Q64521 (pp) Q3ULJ0
15231	pp	Q64521 (pp) Q64516
15230	pp	P13707 (pp) P17751
15229	pp	P13707 (pp) Q64516
15228	pp	P13707 (pp) Q64521
15227	pp	Q9R0K7 (pp) P04925
15226	pp	Q9R0K7 (pp) P12023
15225	pp	Q9D898 (pp) P59999
15224	pp	P63017 (pp) Q61699
15223	pp	P63017 (pp) Q9QYJ0
15222	pp	P63017 (pp) P10637
15221	pp	P63017 (pp) P07901
15220	pp	P63017 (pp) P62259
15219	pp	P63017 (pp) P11499
15218	pp	P63017 (pp) P63038
15217	pp	P63017 (pp) Q60864
15216	pp	P63017 (pp) P63037
15215	pp	Q61548 (pp) P17427
15214	pp	P12367 (pp) D3YVF0
15213	pp	P12367 (pp) Q8BR92
15212	pp	Q9D023 (pp) Q9CQH3
15211	pp	Q9D023 (pp) Q9D6J6
15210	pp	Q9D023 (pp) Q99LC5
15209	pp	P56379 (pp) Q9DB20
15208	pp	P56379 (pp) Q9CPQ8
15207	pp	P56379 (pp) Q9CQZ6
15206	pp	P56379 (pp) P97450
15205	pp	P56379 (pp) Q9D855
15204	pp	P56379 (pp) P52503
15203	pp	P56379 (pp) Q9CQZ5
15202	pp	P56379 (pp) P48771
15201	pp	P56379 (pp) Q9CQ69
15200	pp	P56379 (pp) Q9Z1P6
15199	pp	P56379 (pp) Q06185
15198	pp	P56379 (pp) Q9CQH3
15197	pp	P18052 (pp) P05480
15196	pp	P18052 (pp) P43406
15195	pp	P70232 (pp) P18052
15194	pp	Q9CZS1 (pp) P61922
15193	pp	Q9CZS1 (pp) Q8CHT0
15192	pp	Q9CZS1 (pp) Q9EQ20
15191	pp	O35129 (pp) O35658
15190	pp	O35129 (pp) P63038
15189	pp	O35129 (pp) Q9D0M3
15188	pp	O35129 (pp) Q99LX0
15187	pp	O35129 (pp) P67778
15186	pp	O35129 (pp) Q9DCT2
15185	pp	O35129 (pp) Q9CZ13
15184	pp	O35129 (pp) Q8BGH2
15183	pp	O35129 (pp) P62073
15182	pp	O88696 (pp) Q9CQA3
15181	pp	O88696 (pp) Q8K3J1
15180	pp	O88696 (pp) P97807
15179	pp	O88696 (pp) P56480
15178	pp	O88696 (pp) Q9CZ13
15177	pp	O88696 (pp) Q99LX0
15176	pp	O88696 (pp) Q9Z1P6
15175	pp	O88696 (pp) P67778
15174	pp	O88696 (pp) Q9DCT2
15173	pp	O88696 (pp) Q8CGK3
15172	pp	O88696 (pp) P17751
15171	pp	O88696 (pp) Q91Z53
15170	pp	O88696 (pp) P52503
15169	pp	O88696 (pp) O08756
15168	pp	O88696 (pp) Q91YT0
15167	pp	O88696 (pp) P42125
15166	pp	O88696 (pp) Q8BGH2
15165	pp	O88696 (pp) Q9DC70
15164	pp	O88696 (pp) Q9D3D9
15163	pp	O88696 (pp) Q9D6J6
15162	pp	O88696 (pp) P63038
15161	pp	O88696 (pp) Q9DB20
15160	pp	O88696 (pp) Q9D0M3
15159	pp	O88696 (pp) O35129
15158	pp	Q9CQQ7 (pp) Q9D3D9
15157	pp	Q9CQQ7 (pp) Q9ERS2
15156	pp	Q9CQQ7 (pp) Q9D6J6
15155	pp	Q9CQQ7 (pp) Q3UIU2
15154	pp	Q9CQQ7 (pp) Q91VR2
15153	pp	Q9CQQ7 (pp) Q99LY9
15152	pp	Q9CQQ7 (pp) Q9CQH3
15151	pp	Q9JJV2 (pp) O88935
15150	pp	Q9JJV2 (pp) P39053
15149	pp	Q9JJV2 (pp) Q9QXS6
15148	pp	Q9JJV2 (pp) P60710
15147	pp	Q9DC69 (pp) Q9ERS2
15146	pp	Q9DC69 (pp) Q99LX0
15145	pp	Q9DC69 (pp) Q9CQH3
15144	pp	Q9DC69 (pp) Q9DCX2
15143	pp	Q9DC69 (pp) Q9D6J6
15142	pp	Q9DC69 (pp) P99029
15141	pp	Q9DC69 (pp) Q9D3D9
15140	pp	Q9DC69 (pp) Q9CQQ7
15139	pp	Q9DC69 (pp) O09111
15138	pp	Q9DC69 (pp) Q91VR2
15137	pp	Q91VM9 (pp) Q99LC5
15136	pp	Q91VM9 (pp) P63082
15135	pp	Q91VM9 (pp) Q9CQQ7
15134	pp	Q9DB77 (pp) P00405
15133	pp	Q9DB77 (pp) Q8VEM8
15132	pp	Q9DB77 (pp) Q9D6J6
15131	pp	Q9DB77 (pp) Q9ERS2
15130	pp	Q9DB77 (pp) Q99LY9
15129	pp	Q9DB77 (pp) Q9DCX2
15128	pp	Q9DB77 (pp) Q9CQQ7
15127	pp	Q9DB77 (pp) Q9DCS9
15126	pp	Q9DB77 (pp) Q9DCJ5
15125	pp	Q9DB77 (pp) Q9CR68
15124	pp	Q9DB77 (pp) O09111
15123	pp	Q9DB77 (pp) Q99P72
15122	pp	Q9DB77 (pp) Q3UIU2
15121	pp	Q9DB77 (pp) Q99JY0
15120	pp	Q9DB77 (pp) Q91VR2
15119	pp	Q9DB77 (pp) Q99LC5
15118	pp	Q9DB77 (pp) P19783
15117	pp	Q9DB77 (pp) P68510
15116	pp	Q9DB77 (pp) Q9CQ69
15115	pp	Q9DB77 (pp) Q9WUM5
15114	pp	Q9DB77 (pp) Q9DC69
15113	pp	Q9DB77 (pp) Q91YT0
15112	pp	Q9DB77 (pp) Q9CQH3
15111	pp	Q8K3J1 (pp) Q91VR2
15110	pp	Q8K3J1 (pp) Q9D6J6
15109	pp	Q8K3J1 (pp) Q9DC69
15108	pp	Q8K3J1 (pp) P56391
15107	pp	Q8K3J1 (pp) Q9DCX2
15106	pp	Q8K3J1 (pp) Q9CQH3
15105	pp	Q8K3J1 (pp) Q9CQQ7
15104	pp	Q8K3J1 (pp) Q9ERS2
15103	pp	Q8K3J1 (pp) Q9D3D9
15102	pp	Q8K3J1 (pp) O09111
15101	pp	Q8K3J1 (pp) Q99LX0
15100	pp	Q8K3J1 (pp) Q3UIU2
15099	pp	Q9D855 (pp) Q9CQH3
15098	pp	Q9D855 (pp) Q03265
15097	pp	Q9D855 (pp) P43024
15096	pp	Q9D855 (pp) Q91YT0
15095	pp	Q9D855 (pp) Q8K2B3
15094	pp	Q9D855 (pp) Q9ERS2
15093	pp	Q9D855 (pp) Q9CQQ7
15092	pp	Q9D855 (pp) Q9CZ13
15091	pp	Q9D855 (pp) P97450
15090	pp	Q9D855 (pp) Q9D0M3
15089	pp	Q9D855 (pp) Q91VD9
15088	pp	Q9D855 (pp) Q9DCJ5
15087	pp	Q9D855 (pp) Q99LY9
15086	pp	Q9D855 (pp) Q9CR68
15085	pp	Q9D855 (pp) Q9DB20
15084	pp	Q9D855 (pp) Q9DC69
15083	pp	Q9D855 (pp) Q9DB77
15082	pp	Q9D855 (pp) Q9CPP6
15081	pp	Q9D855 (pp) P56391
15080	pp	Q9D855 (pp) Q06185
15079	pp	Q9D855 (pp) Q9CQZ6
15078	pp	Q9D855 (pp) Q9D023
15077	pp	Q9D855 (pp) Q9DCS9
15076	pp	Q9D855 (pp) P97807
15075	pp	Q9D855 (pp) P52503
15074	pp	Q9D855 (pp) Q3UIU2
15073	pp	Q9D855 (pp) Q9CQ69
15072	pp	Q9D855 (pp) Q9D6J6
15071	pp	Q9D855 (pp) Q9CQJ8
15070	pp	Q9D855 (pp) Q9D3D9
15069	pp	Q9D855 (pp) Q9CQZ5
15068	pp	Q9D855 (pp) Q91VR2
15067	pp	Q9D855 (pp) Q9DCX2
15066	pp	Q9D855 (pp) Q8K3J1
15065	pp	Q9JHU4 (pp) Q8BPN8
15064	pp	Q9JHU4 (pp) P63005
15063	pp	Q9JHU4 (pp) P07901
15062	pp	Q9JHU4 (pp) O08788
15061	pp	Q9JHU4 (pp) P68369
15060	pp	Q9JHU4 (pp) P63101
15059	pp	Q9JHU4 (pp) P68368
15058	pp	Q9JHU4 (pp) Q9DC28
15057	pp	Q9JHU4 (pp) Q99KJ8
15056	pp	Q9JHU4 (pp) Q60996
15055	pp	P46660 (pp) P19246
15054	pp	P46660 (pp) P35438
15053	pp	P63044 (pp) P35802
15052	pp	P63044 (pp) P51863
15051	pp	P63044 (pp) P18872
15050	pp	P63044 (pp) Q6PIE5
15049	pp	P63044 (pp) O35526
15048	pp	P63044 (pp) P62874
15047	pp	P63044 (pp) Q99LX0
15046	pp	P63044 (pp) P39053
15045	pp	P63044 (pp) Q6PIC6
15044	pp	P63044 (pp) P28663
15043	pp	P63044 (pp) O55042
15042	pp	P63044 (pp) P60766
15041	pp	Q62351 (pp) Q68FD5
15040	pp	Q62351 (pp) Q91VZ6
15039	pp	P63001 (pp) P35438
15038	pp	P63001 (pp) P60766
15037	pp	P63001 (pp) Q5FWK3
15036	pp	Q8BG51 (pp) P84096
15035	pp	Q8BG51 (pp) Q5FWK3
15034	pp	Q8BG51 (pp) P63001
15033	pp	Q9CXZ1 (pp) Q9D6J6
15032	pp	Q9CXZ1 (pp) Q91VD9
15031	pp	Q9CXZ1 (pp) Q9DC69
15030	pp	Q9CXZ1 (pp) Q9DCS9
15029	pp	Q9CXZ1 (pp) Q9CQ69
15028	pp	Q9CXZ1 (pp) Q8K3J1
15027	pp	Q9CXZ1 (pp) Q9ERS2
15026	pp	Q9CXZ1 (pp) Q3UIU2
15025	pp	Q9CXZ1 (pp) O09111
15024	pp	Q9CXZ1 (pp) Q9D0M3
15023	pp	Q9CXZ1 (pp) Q9Z1P6
15022	pp	Q9CXZ1 (pp) Q9CQJ8
15021	pp	Q9CXZ1 (pp) Q62425
15020	pp	Q9CXZ1 (pp) Q91YT0
15019	pp	Q9CXZ1 (pp) Q9CR68
15018	pp	Q9CXZ1 (pp) Q99LY9
15017	pp	Q9CXZ1 (pp) Q9DCJ5
15016	pp	Q9CXZ1 (pp) Q9CQQ7
15015	pp	Q9CXZ1 (pp) Q9CQH3
15014	pp	Q9CXZ1 (pp) Q9D6J5
15013	pp	Q9CXZ1 (pp) P97450
15012	pp	Q9CXZ1 (pp) Q9DB77
15011	pp	Q9CXZ1 (pp) Q9CQZ6
15010	pp	Q9CXZ1 (pp) Q9CQ54
15009	pp	Q9CXZ1 (pp) Q99LC3
15008	pp	Q9CXZ1 (pp) Q9CQC7
15007	pp	Q9CXZ1 (pp) Q9CQZ5
15006	pp	Q9CXZ1 (pp) Q9CPP6
15005	pp	Q60676 (pp) P35438
15004	pp	Q60676 (pp) P63330
15003	pp	Q8JZN5 (pp) Q61425
15002	pp	Q8JZN5 (pp) Q8BMS1
15001	pp	Q8JZN5 (pp) Q99LC5
15000	pp	Q8JZQ2 (pp) P63038
14999	pp	Q8JZQ2 (pp) P00493
14998	pp	Q8JZQ2 (pp) Q68FF6
14997	pp	P51174 (pp) Q99LC5
14996	pp	P51174 (pp) Q8BMS1
14995	pp	P51174 (pp) Q91WC3
14994	pp	P51174 (pp) Q8BWT1
14993	pp	P51174 (pp) Q921G7
14992	pp	P51174 (pp) P41216
14991	pp	P51174 (pp) Q61425
14990	pp	P51174 (pp) Q8BGD5
14989	pp	P51174 (pp) Q99JY0
14988	pp	Q8VDD5 (pp) P35438
14987	pp	Q8VDD5 (pp) P63101
14986	pp	Q8VDD5 (pp) Q01097
14985	pp	P18872 (pp) P12023
14984	pp	P18872 (pp) P62874
14983	pp	P18872 (pp) P06151
14982	pp	Q9CQ75 (pp) Q9CPP6
14981	pp	Q9CQ75 (pp) Q91VD9
14980	pp	Q9CQ75 (pp) Q9CQJ8
14979	pp	Q9CQ75 (pp) Q8K3J1
14978	pp	Q9CQ75 (pp) Q9CQZ5
14977	pp	Q9CQ75 (pp) Q9DC69
14976	pp	Q9CQ75 (pp) Q9CPQ1
14975	pp	Q9CQ75 (pp) Q9D3D9
14974	pp	Q9CQ75 (pp) Q9D6J6
14973	pp	Q9CQ75 (pp) Q9CXZ1
14972	pp	Q9CQ75 (pp) Q7TMF3
14971	pp	Q9CQ75 (pp) Q9D6J5
14970	pp	Q9CQ75 (pp) Q99LC3
14969	pp	Q9CQ75 (pp) Q3UIU2
14968	pp	Q9CQ75 (pp) Q9CR68
14967	pp	Q9CQ75 (pp) Q9ERS2
14966	pp	Q9CQ75 (pp) P43024
14965	pp	Q9CQ75 (pp) Q62425
14964	pp	Q9CQ75 (pp) Q9CQH3
14963	pp	Q9CQ75 (pp) Q9D0M3
14962	pp	Q9CQ75 (pp) Q9Z1P6
14961	pp	Q9CQ75 (pp) P56391
14960	pp	Q9CQ75 (pp) Q9CQ69
14959	pp	Q9CQ75 (pp) Q9DCX2
14958	pp	Q9CQ75 (pp) Q9CQZ6
14957	pp	Q9CQ75 (pp) Q99LY9
14956	pp	Q9CQ75 (pp) Q9DCJ5
14955	pp	Q9CQ75 (pp) Q9CQ54
14954	pp	Q9CQ75 (pp) Q9CQC7
14953	pp	Q9CQ75 (pp) O09111
14952	pp	Q9CQ75 (pp) Q9DCS9
14951	pp	Q9CQ75 (pp) P97450
14950	pp	Q9CQ75 (pp) Q9D855
14949	pp	Q9CQ75 (pp) Q9DB20
14948	pp	Q9CQ75 (pp) Q91YT0
14947	pp	Q9CQ75 (pp) P52503
14946	pp	Q9CQ75 (pp) Q9DC70
14945	pp	P03930 (pp) Q9CQQ7
14944	pp	P03930 (pp) Q91VR2
14943	pp	P03930 (pp) Q9D3D9
14942	pp	P49615 (pp) P19246
14941	pp	P39688 (pp) Q60631
14940	pp	P39688 (pp) P30999
14939	pp	P39688 (pp) P18052
14938	pp	P39688 (pp) P49615
14937	pp	P04925 (pp) P62259
14936	pp	P04925 (pp) O35136
14935	pp	P04925 (pp) P11627
14934	pp	P04925 (pp) O08599
14933	pp	P04925 (pp) P63101
14932	pp	P04925 (pp) O88935
14931	pp	P04925 (pp) Q99PJ0
14930	pp	P04925 (pp) Q99N28
14929	pp	P04925 (pp) Q9Z218
14928	pp	P04925 (pp) Q8VDN2
14927	pp	Q99JY0 (pp) Q8BMS1
14926	pp	Q99JY0 (pp) Q9DBL1
14925	pp	O08756 (pp) Q8BMS1
14924	pp	O08756 (pp) Q9CQH3
14923	pp	O08756 (pp) O09111
14922	pp	O08756 (pp) Q99JY0
14921	pp	P28660 (pp) Q9JJV2
14920	pp	P60879 (pp) P63017
14919	pp	P60879 (pp) O55042
14918	pp	P60879 (pp) Q8K400
14917	pp	P60879 (pp) P63040
14916	pp	P60879 (pp) P61264
14915	pp	P60879 (pp) O08599
14914	pp	P60879 (pp) Q7TSJ2
14913	pp	P60879 (pp) P68368
14912	pp	P60879 (pp) P16858
14911	pp	P60879 (pp) Q9QWI6
14910	pp	P60879 (pp) P46096
14909	pp	P60879 (pp) P17426
14908	pp	P60879 (pp) Q62442
14907	pp	P60879 (pp) P47708
14906	pp	P60879 (pp) P63044
14905	pp	P60879 (pp) P51863
14904	pp	P60879 (pp) P06837
14903	pp	P60879 (pp) P28660
14902	pp	Q9DCJ5 (pp) O09111
14901	pp	Q9DCJ5 (pp) P56391
14900	pp	Q9DCJ5 (pp) Q99LY9
14899	pp	Q9DCJ5 (pp) Q91VR2
14898	pp	Q9DCJ5 (pp) Q9D6J6
14897	pp	Q9DCJ5 (pp) P99029
14896	pp	Q9DCJ5 (pp) O08756
14895	pp	Q9DCJ5 (pp) Q99LX0
14894	pp	Q9DCJ5 (pp) P67778
14893	pp	Q9DCJ5 (pp) Q9DCX2
14892	pp	Q9DCJ5 (pp) Q9CQH3
14891	pp	Q9DCJ5 (pp) Q9CPQ8
14890	pp	Q9DCJ5 (pp) Q9ERS2
14889	pp	Q9DCJ5 (pp) Q9CQQ7
14888	pp	Q9DCJ5 (pp) Q9DC69
14887	pp	Q9DCJ5 (pp) Q9D3D9
14886	pp	Q9DCJ5 (pp) Q3UIU2
14885	pp	Q9DCJ5 (pp) Q8K3J1
14884	pp	Q9DCJ5 (pp) P50516
14883	pp	Q91YT0 (pp) Q9WUM5
14882	pp	Q91YT0 (pp) Q8CAQ8
14881	pp	Q91YT0 (pp) Q9DCJ5
14880	pp	Q91YT0 (pp) Q99LX0
14879	pp	Q91YT0 (pp) Q9CQ69
14878	pp	Q91YT0 (pp) O09111
14877	pp	Q91YT0 (pp) Q8K3J1
14876	pp	Q91YT0 (pp) Q91VR2
14875	pp	Q91YT0 (pp) Q3UIU2
14874	pp	Q91YT0 (pp) Q9D2G2
14873	pp	Q91YT0 (pp) Q9DCS9
14872	pp	Q91YT0 (pp) Q9D3D9
14871	pp	Q91YT0 (pp) Q9ERS2
14870	pp	Q91YT0 (pp) Q60597
14869	pp	Q91YT0 (pp) Q9CR68
14868	pp	Q91YT0 (pp) Q9CQQ7
14867	pp	Q91YT0 (pp) Q9DCX2
14866	pp	Q91YT0 (pp) Q9DC69
14865	pp	Q91YT0 (pp) P70404
14864	pp	Q91YT0 (pp) Q9D6J6
14863	pp	Q91YT0 (pp) Q9CQH3
14862	pp	Q91YT0 (pp) Q06185
14861	pp	Q9JM76 (pp) P59999
14860	pp	Q9JM76 (pp) P68510
14859	pp	Q9JM76 (pp) Q9D898
14858	pp	Q9R0Q6 (pp) Q9CPW4
14857	pp	Q9R0Q6 (pp) P59999
14856	pp	Q9R0Q6 (pp) Q9JM76
14855	pp	Q68FD5 (pp) P17426
14854	pp	Q68FD5 (pp) Q62420
14853	pp	Q68FD5 (pp) P62962
14852	pp	Q68FD5 (pp) P35438
14851	pp	Q68FD5 (pp) Q6IRU5
14850	pp	Q68FD5 (pp) P63101
14849	pp	Q68FD5 (pp) Q80VP1
14848	pp	Q68FD5 (pp) O35643
14847	pp	Q68FD5 (pp) Q80TZ3
14846	pp	Q68FD5 (pp) Q9Z0R4
14845	pp	Q68FD5 (pp) O70589
14844	pp	Q68FD5 (pp) O08585
14843	pp	Q68FD5 (pp) P62743
14842	pp	Q68FD5 (pp) Q8CHC4
14841	pp	Q68FD5 (pp) Q01097
14840	pp	Q68FD5 (pp) Q8CHU3
14839	pp	Q68FD5 (pp) Q61548
14838	pp	Q68FD5 (pp) P62259
14837	pp	Q60864 (pp) P63038
14836	pp	Q60864 (pp) P04925
14835	pp	Q60864 (pp) Q9CR16
14834	pp	Q60864 (pp) P48722
14833	pp	Q60864 (pp) Q61699
14832	pp	Q60864 (pp) P63037
14831	pp	Q60864 (pp) P17156
14830	pp	Q60864 (pp) Q9QYJ0
14829	pp	P19536 (pp) P00405
14828	pp	P19536 (pp) Q91VR2
14827	pp	P19536 (pp) Q9CQH3
14826	pp	P19536 (pp) Q9CQ69
14825	pp	P19536 (pp) P56391
14824	pp	P19536 (pp) Q9D3D9
14823	pp	P19536 (pp) Q9CR68
14822	pp	Q9JLB0 (pp) O70318
14821	pp	Q9JLB0 (pp) Q8R5M8
14820	pp	Q9JLB0 (pp) Q99N28
14819	pp	Q8BVE3 (pp) Q9DC69
14818	pp	Q8BVE3 (pp) P50516
14817	pp	Q8BVE3 (pp) P63082
14816	pp	Q8BVE3 (pp) Q9Z1G4
14815	pp	Q8BVE3 (pp) P45878
14814	pp	P50518 (pp) P50516
14813	pp	P50518 (pp) Q9Z1G3
14812	pp	P50518 (pp) Q9WTT4
14811	pp	P50518 (pp) P57746
14810	pp	P50518 (pp) P63082
14809	pp	P50518 (pp) Q9Z1G4
14808	pp	P50518 (pp) Q8BVE3
14807	pp	Q61735 (pp) P97797
14806	pp	Q9DCX2 (pp) Q99LY9
14805	pp	Q9DCX2 (pp) Q9D3D9
14804	pp	Q9DCX2 (pp) Q9CQH3
14803	pp	Q9DCX2 (pp) Q9D6J6
14802	pp	Q9DCX2 (pp) Q9CQQ7
14801	pp	Q9DCX2 (pp) Q91VR2
14800	pp	Q9DCX2 (pp) Q99LX0
14799	pp	Q9DCX2 (pp) Q9ERS2
14798	pp	Q7TMF3 (pp) Q99LC3
14797	pp	Q7TMF3 (pp) Q91VD9
14796	pp	Q7TMF3 (pp) Q91YT0
14795	pp	Q7TMF3 (pp) Q9CQ69
14794	pp	Q7TMF3 (pp) Q9D6J6
14793	pp	Q7TMF3 (pp) Q9D3D9
14792	pp	Q7TMF3 (pp) Q9CQH3
14791	pp	Q7TMF3 (pp) Q9CQC7
14790	pp	Q7TMF3 (pp) Q8K3J1
14789	pp	Q7TMF3 (pp) Q99LY9
14788	pp	Q7TMF3 (pp) Q9D6J5
14787	pp	Q7TMF3 (pp) Q9CQJ8
14786	pp	Q7TMF3 (pp) Q9ERS2
14785	pp	Q7TMF3 (pp) Q3UIU2
14784	pp	Q7TMF3 (pp) Q9CQZ6
14783	pp	Q7TMF3 (pp) Q9DCJ5
14782	pp	Q7TMF3 (pp) Q9Z1P6
14781	pp	Q7TMF3 (pp) Q9CQQ7
14780	pp	Q7TMF3 (pp) Q9CQZ5
14779	pp	Q7TMF3 (pp) Q9DCS9
14778	pp	Q7TMF3 (pp) Q9DC70
14777	pp	Q7TMF3 (pp) Q9D855
14776	pp	Q7TMF3 (pp) P52503
14775	pp	Q7TMF3 (pp) P97450
14774	pp	Q7TMF3 (pp) Q9D0M3
14773	pp	Q7TMF3 (pp) Q62425
14772	pp	Q7TMF3 (pp) Q9DC69
14771	pp	Q7TMF3 (pp) Q9CQ54
14770	pp	Q7TMF3 (pp) Q9CR68
14769	pp	Q7TMF3 (pp) O09111
14768	pp	Q7TMF3 (pp) Q9CXZ1
14767	pp	Q7TMF3 (pp) Q9DCX2
14766	pp	O35658 (pp) Q9CQQ7
14765	pp	O35658 (pp) P40630
14764	pp	Q99KR7 (pp) P56480
14763	pp	Q99KR7 (pp) O35658
14762	pp	P62874 (pp) P04925
14761	pp	P63213 (pp) P18872
14760	pp	P63213 (pp) P62874
14759	pp	P40142 (pp) P05063
14758	pp	P40142 (pp) Q9D0F9
14757	pp	P40142 (pp) P35486
14756	pp	P40142 (pp) P17182
14755	pp	P40142 (pp) P06151
14754	pp	P40142 (pp) P05064
14753	pp	P40142 (pp) P17751
14752	pp	P40142 (pp) P52480
14751	pp	P40142 (pp) Q60597
14750	pp	P40142 (pp) P16858
14749	pp	P40142 (pp) Q93092
14748	pp	P40142 (pp) P06745
14747	pp	P40142 (pp) Q9DCD0
14746	pp	P40142 (pp) P09411
14745	pp	Q9CQR4 (pp) Q61425
14744	pp	Q9CQR4 (pp) Q99LC5
14743	pp	Q9CQR4 (pp) Q9DCJ5
14742	pp	Q9CQR4 (pp) Q9CQZ5
14741	pp	Q9CQR4 (pp) Q9CQZ6
14740	pp	Q9CQR4 (pp) Q9DCD0
14739	pp	Q9CQR4 (pp) Q9D6J6
14738	pp	Q9CQR4 (pp) P97450
14737	pp	Q9CQR4 (pp) Q9CQH3
14736	pp	Q9CQV8 (pp) P10637
14735	pp	Q9CQV8 (pp) Q64010
14734	pp	Q9CQV8 (pp) P16054
14733	pp	Q9CQV8 (pp) P63101
14732	pp	Q9CQV8 (pp) P62259
14731	pp	P99029 (pp) Q9D6J6
14730	pp	P62073 (pp) Q9CQH3
14729	pp	P62073 (pp) Q9D6J6
14728	pp	P62073 (pp) P67778
14727	pp	P62073 (pp) Q9DCS9
14726	pp	P62073 (pp) Q9D3D9
14725	pp	P62073 (pp) Q9CR68
14724	pp	P62073 (pp) O35658
14723	pp	P62073 (pp) P56391
14722	pp	P62073 (pp) Q9DCJ5
14721	pp	P62073 (pp) Q925I1
14720	pp	P62073 (pp) Q9ERS2
14719	pp	P62073 (pp) O08756
14718	pp	P62073 (pp) P99029
14717	pp	Q62277 (pp) P43006
14716	pp	Q62277 (pp) P01831
14715	pp	Q62277 (pp) P63044
14714	pp	Q62277 (pp) P46096
14713	pp	Q62277 (pp) P62204
14712	pp	Q62277 (pp) P60879
14711	pp	Q60631 (pp) Q68FD5
14710	pp	Q60631 (pp) P39053
14709	pp	Q60631 (pp) Q8CHC4
14708	pp	Q60631 (pp) P05480
14707	pp	Q60631 (pp) O08585
14706	pp	Q60631 (pp) P12023
14705	pp	Q60631 (pp) P20444
14704	pp	Q60631 (pp) P04925
14703	pp	Q60631 (pp) P18052
14702	pp	Q60631 (pp) Q62420
14701	pp	Q60631 (pp) Q62277
14700	pp	P52503 (pp) Q9Z1P6
14699	pp	P52503 (pp) Q9CQ69
14698	pp	P52503 (pp) O09111
14697	pp	P52503 (pp) O08756
14696	pp	P52503 (pp) Q9D3D9
14695	pp	P52503 (pp) Q9DCS9
14694	pp	P52503 (pp) Q99LY9
14693	pp	P52503 (pp) Q9CPP6
14692	pp	P52503 (pp) P17665
14691	pp	P52503 (pp) Q9CQ54
14690	pp	P52503 (pp) Q06185
14689	pp	P52503 (pp) Q9ERS2
14688	pp	P52503 (pp) P99029
14687	pp	P52503 (pp) Q9D6J5
14686	pp	P52503 (pp) Q9CQC7
14685	pp	P52503 (pp) Q9D0M3
14684	pp	P52503 (pp) Q9CXZ1
14683	pp	P52503 (pp) Q9DCJ5
14682	pp	P52503 (pp) Q99LX0
14681	pp	P52503 (pp) P97450
14680	pp	P52503 (pp) Q99LC3
14679	pp	P52503 (pp) Q9DB20
14678	pp	P52503 (pp) P56391
14677	pp	P52503 (pp) Q9CR68
14676	pp	P52503 (pp) Q9CQH3
14675	pp	P52503 (pp) Q9CQJ8
14674	pp	P52503 (pp) Q9CQQ7
14673	pp	P52503 (pp) Q8K3J1
14672	pp	P52503 (pp) Q9DC69
14671	pp	P52503 (pp) P62073
14670	pp	P52503 (pp) P43024
14669	pp	P52503 (pp) P42125
14668	pp	P52503 (pp) Q9CQZ5
14667	pp	P52503 (pp) Q91VD9
14666	pp	P52503 (pp) Q9CZ13
14665	pp	P52503 (pp) Q91YT0
14664	pp	P52503 (pp) Q9CQZ6
14663	pp	P52503 (pp) P48771
14662	pp	P52503 (pp) Q9D6J6
14661	pp	Q8R4N0 (pp) Q99LC5
14660	pp	Q8R4N0 (pp) Q9WUM5
14659	pp	Q8R4N0 (pp) P05480
14658	pp	Q8R4N0 (pp) Q99MR8
14657	pp	Q8R4N0 (pp) Q91ZA3
14656	pp	Q3ULD5 (pp) Q05920
14655	pp	Q3ULD5 (pp) Q9D0K2
14654	pp	Q3ULD5 (pp) Q99MR8
14653	pp	Q3ULD5 (pp) Q91ZA3
14652	pp	Q3ULD5 (pp) Q8BH95
14651	pp	Q3ULD5 (pp) Q8BMS1
14650	pp	Q3ULD5 (pp) Q921G7
14649	pp	Q3ULD5 (pp) Q9JHI5
14648	pp	Q3ULD5 (pp) Q99MN9
14647	pp	Q3ULD5 (pp) Q8R4N0
14646	pp	Q8VEM8 (pp) Q9D3D9
14645	pp	Q8VEM8 (pp) Q9CQQ7
14644	pp	Q8VEM8 (pp) Q9CQH3
14643	pp	Q8VEM8 (pp) Q9D6J6
14642	pp	P68369 (pp) P60879
14641	pp	P68369 (pp) P35438
14640	pp	P68369 (pp) P63101
14639	pp	P68369 (pp) P27546
14638	pp	P68369 (pp) P39053
14637	pp	Q8K2B3 (pp) Q99JY0
14636	pp	Q8K2B3 (pp) P58281
14635	pp	Q8K2B3 (pp) P17751
14634	pp	Q8K2B3 (pp) Q91VD9
14633	pp	Q8K2B3 (pp) Q9D6R2
14632	pp	Q8K2B3 (pp) P63038
14631	pp	Q8K2B3 (pp) Q8K3J1
14630	pp	Q8K2B3 (pp) P35486
14629	pp	Q8K2B3 (pp) Q9DB77
14628	pp	Q8K2B3 (pp) Q9D6J6
14627	pp	Q8K2B3 (pp) Q9DC69
14626	pp	Q8K2B3 (pp) Q9CZ13
14625	pp	Q8K2B3 (pp) Q9CR68
14624	pp	Q8K2B3 (pp) Q99LC5
14623	pp	Q8K2B3 (pp) Q9WUM5
14622	pp	Q8K2B3 (pp) P56480
14621	pp	Q8K2B3 (pp) Q60597
14620	pp	Q8K2B3 (pp) P00493
14619	pp	Q8K2B3 (pp) Q9Z2I9
14618	pp	Q8K2B3 (pp) Q91YT0
14617	pp	Q8K2B3 (pp) P09411
14616	pp	Q8K2B3 (pp) Q99KI0
14615	pp	Q8K2B3 (pp) Q9CQQ7
14614	pp	Q8K2B3 (pp) Q9CPP6
14613	pp	Q8K2B3 (pp) P52196
14612	pp	Q8K2B3 (pp) Q03265
14611	pp	Q8K2B3 (pp) Q9D051
14610	pp	Q8K2B3 (pp) Q9Z0X1
14609	pp	Q8K2B3 (pp) Q9D2G2
14608	pp	Q8K2B3 (pp) Q91VR2
14607	pp	Q8K2B3 (pp) Q9D0M3
14606	pp	Q8K2B3 (pp) Q8VEM8
14605	pp	Q8K2B3 (pp) Q8JZQ2
14604	pp	Q8K2B3 (pp) P97807
14603	pp	Q91WD5 (pp) Q9CPP6
14602	pp	Q91WD5 (pp) Q99LY9
14601	pp	Q91WD5 (pp) Q91YT0
14600	pp	Q91WD5 (pp) Q9DC69
14599	pp	Q91WD5 (pp) Q9WUM5
14598	pp	Q91WD5 (pp) P35486
14597	pp	Q91WD5 (pp) Q91VD9
14596	pp	Q91WD5 (pp) P09411
14595	pp	Q91WD5 (pp) Q9DB20
14594	pp	Q91WD5 (pp) Q9CZ13
14593	pp	Q91WD5 (pp) Q99LC5
14592	pp	Q91WD5 (pp) Q8BH95
14591	pp	Q91WD5 (pp) P17751
14590	pp	Q91WD5 (pp) P52503
14589	pp	Q91WD5 (pp) Q8K1Z0
14588	pp	Q91WD5 (pp) Q9ERS2
14587	pp	Q91WD5 (pp) Q9CQ75
14586	pp	Q91WD5 (pp) Q9D6J5
14585	pp	Q91WD5 (pp) Q8K3J1
14584	pp	Q91WD5 (pp) P56480
14583	pp	Q91WD5 (pp) Q6PB66
14582	pp	Q91WD5 (pp) Q8CAQ8
14581	pp	Q91WD5 (pp) Q7TMF3
14580	pp	Q91WD5 (pp) Q03265
14579	pp	Q91WD5 (pp) Q8BGH2
14578	pp	Q91WD5 (pp) P20108
14577	pp	Q91WD5 (pp) Q3ULD5
14576	pp	Q91WD5 (pp) Q9CR68
14575	pp	Q91WD5 (pp) Q9DCS9
14574	pp	Q91WD5 (pp) Q9D6J6
14573	pp	Q91WD5 (pp) Q9CXZ1
14572	pp	Q91WD5 (pp) Q9DB77
14571	pp	Q91WD5 (pp) Q9CQJ8
14570	pp	Q91WD5 (pp) Q9CQC7
14569	pp	Q91WD5 (pp) P97450
14568	pp	Q91WD5 (pp) Q9CQZ5
14567	pp	Q91WD5 (pp) Q99LC3
14566	pp	Q91WD5 (pp) Q99LX0
14565	pp	Q91WD5 (pp) Q9CQQ7
14564	pp	Q91WD5 (pp) P97807
14563	pp	Q91WD5 (pp) Q9DC70
14562	pp	Q91WD5 (pp) Q9CQH3
14561	pp	Q91WD5 (pp) Q9D855
14560	pp	Q91WD5 (pp) Q9CQ69
14559	pp	Q91WD5 (pp) Q91VR2
14558	pp	Q91WD5 (pp) Q99JY0
14557	pp	Q91WD5 (pp) Q99KI0
14556	pp	Q91WD5 (pp) Q9D0M3
14555	pp	Q91WD5 (pp) Q8VEM8
14554	pp	Q91WD5 (pp) P70404
14553	pp	Q91WD5 (pp) P08249
14552	pp	Q91WD5 (pp) Q9DCJ5
14551	pp	Q91WD5 (pp) Q99MN9
14550	pp	Q91WD5 (pp) Q9CQZ6
14549	pp	Q91WD5 (pp) Q8K2B3
14548	pp	P51881 (pp) P16054
14547	pp	P51881 (pp) P62259
14546	pp	P05480 (pp) P23242
14545	pp	P05480 (pp) P30999
14544	pp	P05480 (pp) P39053
14543	pp	P05480 (pp) P35438
14542	pp	P05480 (pp) P35436
14541	pp	Q02248 (pp) P63001
14540	pp	Q02248 (pp) Q01097
14539	pp	Q02248 (pp) O88712
14538	pp	Q02248 (pp) Q68FH0
14537	pp	Q02248 (pp) P68510
14536	pp	Q02248 (pp) P39688
14535	pp	Q02248 (pp) P35438
14534	pp	Q02248 (pp) Q61301
14533	pp	Q02248 (pp) P05480
14532	pp	P60710 (pp) O70589
14531	pp	P60710 (pp) Q9JM76
14530	pp	P60710 (pp) Q9CPW4
14529	pp	P60710 (pp) P16054
14528	pp	P60710 (pp) P35438
14527	pp	P60710 (pp) Q9D898
14526	pp	P60710 (pp) P59999
14525	pp	P60710 (pp) Q9R0Q6
14524	pp	Q6PHZ2 (pp) P68369
14523	pp	Q6PHZ2 (pp) P63101
14522	pp	Q6PHZ2 (pp) P35436
14521	pp	Q6PHZ2 (pp) P99024
14520	pp	Q6PHZ2 (pp) P60710
14519	pp	P97807 (pp) P05202
14518	pp	P97807 (pp) Q60931
14517	pp	P97807 (pp) Q9CQH3
14516	pp	P97807 (pp) Q921G7
14515	pp	P97807 (pp) Q9CR68
14514	pp	P97807 (pp) Q61425
14513	pp	P97807 (pp) Q8BMF4
14512	pp	P97807 (pp) P06745
14511	pp	P97807 (pp) Q9D6J6
14510	pp	P97807 (pp) Q9WUM5
14509	pp	P97807 (pp) P06151
14508	pp	P97807 (pp) Q8K3J1
14507	pp	P97807 (pp) Q91YT0
14506	pp	P97807 (pp) Q91VR2
14505	pp	P97807 (pp) Q05920
14504	pp	P97807 (pp) Q60597
14503	pp	P97807 (pp) Q9DC69
14502	pp	P97807 (pp) Q99LC5
14501	pp	P97807 (pp) Q9DCS9
14500	pp	P97807 (pp) Q9DCJ5
14499	pp	P97807 (pp) Q9DCD0
14498	pp	P97807 (pp) O08756
14497	pp	P97807 (pp) P48771
14496	pp	P97807 (pp) Q9CQQ7
14495	pp	P97807 (pp) Q9D6R2
14494	pp	P97807 (pp) Q9D2G2
14493	pp	P97807 (pp) Q99LX0
14492	pp	P97807 (pp) P54071
14491	pp	P97807 (pp) Q06185
14490	pp	Q9ERS2 (pp) Q9CQH3
14489	pp	Q9ERS2 (pp) Q9D6J6
14488	pp	Q9ERS2 (pp) O09111
14487	pp	Q9ERS2 (pp) Q91VR2
14486	pp	Q9ERS2 (pp) P50516
14485	pp	Q99KI0 (pp) Q9D6J6
14484	pp	Q99KI0 (pp) P05064
14483	pp	Q99KI0 (pp) P56480
14482	pp	Q99KI0 (pp) P97807
14481	pp	Q99KI0 (pp) Q01097
14480	pp	Q99KI0 (pp) Q03265
14479	pp	Q99KI0 (pp) Q9Z1J3
14478	pp	Q99KI0 (pp) P35486
14477	pp	Q99KI0 (pp) Q99LX0
14476	pp	Q99KI0 (pp) Q60597
14475	pp	Q99KI0 (pp) Q9WUM5
14474	pp	Q99KI0 (pp) P68510
14473	pp	Q99KI0 (pp) Q8K1M6
14472	pp	Q99KI0 (pp) Q9CPP6
14471	pp	Q99KI0 (pp) Q9D0M3
14470	pp	Q99KI0 (pp) Q9DCJ5
14469	pp	Q99KI0 (pp) Q9DB20
14468	pp	Q99KI0 (pp) P06745
14467	pp	Q99KI0 (pp) Q9CR68
14466	pp	Q99KI0 (pp) Q91YT0
14465	pp	Q99KI0 (pp) Q9ERS2
14464	pp	Q99KI0 (pp) Q9D6R2
14463	pp	Q99KI0 (pp) O09111
14462	pp	Q99KI0 (pp) P70404
14461	pp	Q99KI0 (pp) Q9D3D9
14460	pp	Q99KI0 (pp) Q05920
14459	pp	Q99KI0 (pp) P52480
14458	pp	Q99KI0 (pp) P47857
14457	pp	Q99KI0 (pp) P54071
14456	pp	Q99KI0 (pp) P63038
14455	pp	Q99KI0 (pp) Q9CZ13
14454	pp	Q99KI0 (pp) Q9DB77
14453	pp	Q99KI0 (pp) Q9DC69
14452	pp	Q99KI0 (pp) P17751
14451	pp	Q99KI0 (pp) Q9CQH3
14450	pp	Q99KI0 (pp) Q91VR2
14449	pp	Q99KI0 (pp) Q62351
14448	pp	Q99KI0 (pp) Q9D2G2
14447	pp	O08788 (pp) O35465
14446	pp	Q99KJ8 (pp) P28667
14445	pp	Q99KJ8 (pp) O08788
14444	pp	Q91Z53 (pp) P45376
14443	pp	P26443 (pp) Q9DCD0
14442	pp	P26443 (pp) P54071
14441	pp	P26443 (pp) P48320
14440	pp	P26443 (pp) Q99KI0
14439	pp	P26443 (pp) P63038
14438	pp	P26443 (pp) P56480
14437	pp	P26443 (pp) P70404
14436	pp	P26443 (pp) Q60597
14435	pp	P26443 (pp) P17751
14434	pp	P26443 (pp) P61922
14433	pp	P26443 (pp) Q05920
14432	pp	P26443 (pp) P05063
14431	pp	P26443 (pp) P29758
14430	pp	P26443 (pp) Q8CHT0
14429	pp	P26443 (pp) Q8BH04
14428	pp	P26443 (pp) Q9D6R2
14427	pp	P26443 (pp) P15105
14426	pp	P26443 (pp) P05202
14425	pp	P26443 (pp) P97807
14424	pp	P26443 (pp) Q61425
14423	pp	P26443 (pp) Q91Z53
14422	pp	Q62442 (pp) P61264
14421	pp	Q9D172 (pp) Q9DC70
14420	pp	Q9D172 (pp) P42125
14419	pp	Q9D172 (pp) Q9DCJ5
14418	pp	Q9D172 (pp) Q8BH95
14417	pp	Q9D172 (pp) Q91WD5
14416	pp	Q9D172 (pp) Q9CZ13
14415	pp	Q9D172 (pp) Q9DCT2
14414	pp	Q9D172 (pp) Q9CQZ5
14413	pp	Q9D172 (pp) Q91YT0
14412	pp	Q9D172 (pp) P97807
14411	pp	Q9D172 (pp) Q9CQH3
14410	pp	P56391 (pp) Q9DCX2
14409	pp	P56391 (pp) P17665
14408	pp	P56391 (pp) P00405
14407	pp	P56391 (pp) Q9ERS2
14406	pp	P56391 (pp) Q9D3D9
14405	pp	P56391 (pp) O09111
14404	pp	Q9WV18 (pp) Q80T41
14403	pp	O35526 (pp) O08599
14402	pp	O35526 (pp) P60879
14401	pp	O35526 (pp) P63040
14400	pp	O35526 (pp) Q62442
14399	pp	Q8R5M8 (pp) O70589
14398	pp	Q9WV92 (pp) P12023
14397	pp	Q9WV92 (pp) Q8R5M8
14396	pp	P62814 (pp) Q9Z1G4
14395	pp	P62814 (pp) Q9WTT4
14394	pp	P62814 (pp) P50518
14393	pp	P62814 (pp) Q91VM9
14392	pp	P62814 (pp) P63082
14391	pp	P62814 (pp) Q9Z1G3
14390	pp	P62814 (pp) Q9DC69
14389	pp	P62814 (pp) P57746
14388	pp	P62814 (pp) Q8BVE3
14387	pp	P62814 (pp) P50516
14386	pp	P62814 (pp) P51863
14385	pp	P12023 (pp) P61264
14384	pp	P12023 (pp) P63017
14383	pp	P12023 (pp) P11627
14382	pp	P12023 (pp) Q61316
14381	pp	P12023 (pp) Q9CQV8
14380	pp	P12023 (pp) Q9Z1G4
14379	pp	P12023 (pp) Q68FD5
14378	pp	P12023 (pp) P01831
14377	pp	P12023 (pp) Q62420
14376	pp	P12023 (pp) P97300
14375	pp	P12023 (pp) O55042
14374	pp	P12023 (pp) P60879
14373	pp	P12023 (pp) P46660
14372	pp	P12023 (pp) Q812A2
14371	pp	P12023 (pp) O54991
14370	pp	P12023 (pp) P28652
14369	pp	P12023 (pp) Q91ZZ3
14368	pp	P12023 (pp) P57780
14367	pp	P12023 (pp) P46096
14366	pp	P12023 (pp) P62821
14365	pp	P12023 (pp) P08551
14364	pp	P12023 (pp) P12960
14363	pp	P12023 (pp) P39053
14362	pp	P12023 (pp) O08599
14361	pp	P12023 (pp) P68510
14360	pp	P12023 (pp) P60710
14359	pp	P12023 (pp) P63101
14358	pp	P12023 (pp) Q9JIS5
14357	pp	P12023 (pp) P13595
14356	pp	P12023 (pp) O88737
14355	pp	P12023 (pp) P61982
14354	pp	P12023 (pp) P07901
14353	pp	P12023 (pp) O88935
14352	pp	P12023 (pp) Q64332
14351	pp	P12023 (pp) P56564
14350	pp	P12023 (pp) P35564
14349	pp	P12023 (pp) Q60932
14348	pp	P12023 (pp) Q61548
14347	pp	P12023 (pp) Q9D6F9
14346	pp	P12023 (pp) P62259
14345	pp	P12023 (pp) Q810U3
14344	pp	P12023 (pp) Q9Z1G3
14343	pp	P12023 (pp) Q62277
14342	pp	P12023 (pp) Q9JHU4
14341	pp	P12023 (pp) Q8VDN2
14340	pp	P12023 (pp) P68254
14339	pp	P12023 (pp) O08756
14338	pp	P12023 (pp) O35526
14337	pp	P12023 (pp) P63011
14336	pp	P12023 (pp) P06837
14335	pp	P12023 (pp) Q9CZT8
14334	pp	P12023 (pp) P62823
14333	pp	P12023 (pp) P63044
14332	pp	P12023 (pp) P04925
14331	pp	P12023 (pp) Q9WV18
14330	pp	P12023 (pp) P46460
14329	pp	P61922 (pp) Q9EQ20
14328	pp	P61922 (pp) P15105
14327	pp	P61922 (pp) Q9DBF1
14326	pp	P48320 (pp) P15105
14325	pp	P48320 (pp) P61922
14324	pp	P17710 (pp) Q9WUA3
14323	pp	P05064 (pp) P05063
14322	pp	P05064 (pp) Q61735
14321	pp	P05064 (pp) P17182
14320	pp	P05064 (pp) Q9WUA3
14319	pp	P05064 (pp) P17710
14318	pp	P11499 (pp) Q9CR16
14317	pp	P11499 (pp) P60710
14316	pp	P11499 (pp) P63037
14315	pp	P11499 (pp) P63038
14314	pp	P11499 (pp) Q60864
14313	pp	P11499 (pp) P62259
14312	pp	Q8K1Z0 (pp) Q9ERS2
14311	pp	Q8K1Z0 (pp) Q9D6J6
14310	pp	Q8K1Z0 (pp) Q9WUM5
14309	pp	Q8K1Z0 (pp) Q9DCJ5
14308	pp	P62331 (pp) O70161
14307	pp	Q99LX0 (pp) Q9CQH3
14306	pp	Q99LX0 (pp) Q91VR2
14305	pp	Q99LX0 (pp) O08756
14304	pp	Q99LX0 (pp) O55042
14303	pp	Q99LX0 (pp) Q9D6J6
14302	pp	Q99LX0 (pp) O09111
14301	pp	Q99LX0 (pp) Q62277
14300	pp	Q8BGH2 (pp) Q91YT0
14299	pp	Q8BGH2 (pp) Q9WUM5
14298	pp	Q8BGH2 (pp) Q9DCJ5
14297	pp	Q8BGH2 (pp) Q9CRB9
14296	pp	Q8BGH2 (pp) P97807
14295	pp	Q8BGH2 (pp) O88441
14294	pp	Q8BGH2 (pp) Q9QYA2
14293	pp	Q8BGH2 (pp) Q9DC69
14292	pp	Q8BGH2 (pp) Q9CZ13
14291	pp	Q8BGH2 (pp) Q8CAQ8
14290	pp	Q8BGH2 (pp) Q8BH95
14289	pp	Q8BGH2 (pp) Q99LX0
14288	pp	Q99LC5 (pp) Q9DC69
14287	pp	Q99LC5 (pp) O88441
14286	pp	Q99LC5 (pp) Q9CR68
14285	pp	Q99LC5 (pp) Q9WUM5
14284	pp	Q99LC5 (pp) Q8BWT1
14283	pp	Q99LC5 (pp) Q9Z0X1
14282	pp	Q99LC5 (pp) Q91YT0
14281	pp	Q99LC5 (pp) O08756
14280	pp	Q99LC5 (pp) Q99JY0
14279	pp	Q99LC5 (pp) Q9DBL1
14278	pp	Q99LC5 (pp) Q91VR2
14277	pp	Q99LC5 (pp) Q80U28
14276	pp	Q99LC5 (pp) Q9CQH3
14275	pp	Q99LC5 (pp) Q91ZJ5
14274	pp	Q99LC5 (pp) Q6PB66
14273	pp	Q99LC5 (pp) Q9DCJ5
14272	pp	Q99LC5 (pp) Q9D6J6
14271	pp	Q99LC5 (pp) P50544
14270	pp	Q99LC5 (pp) O09111
14269	pp	Q61425 (pp) Q9EQ20
14268	pp	Q61425 (pp) Q8QZT1
14267	pp	Q61425 (pp) P47738
14266	pp	Q61425 (pp) O08756
14265	pp	Q61425 (pp) Q99JY0
14264	pp	Q61425 (pp) Q8BWT1
14263	pp	Q61425 (pp) Q9CQ62
14262	pp	Q61425 (pp) Q8BMS1
14261	pp	Q61425 (pp) Q9CZS1
14260	pp	Q61425 (pp) Q9D0K2
14259	pp	Q61425 (pp) Q9DBL1
14258	pp	Q61425 (pp) Q9WUM5
14257	pp	Q61425 (pp) Q99LC5
14256	pp	P12787 (pp) P56480
14255	pp	P12787 (pp) Q06185
14254	pp	P12787 (pp) Q9CXZ1
14253	pp	P12787 (pp) Q9CQZ6
14252	pp	P12787 (pp) P19536
14251	pp	P12787 (pp) P43024
14250	pp	P12787 (pp) Q9DB77
14249	pp	P12787 (pp) Q9CQA3
14248	pp	P12787 (pp) Q9D855
14247	pp	P12787 (pp) Q03265
14246	pp	P12787 (pp) P09671
14245	pp	P12787 (pp) Q9CQH3
14244	pp	P12787 (pp) Q9DCX2
14243	pp	P12787 (pp) Q99LC3
14242	pp	P12787 (pp) Q91VR2
14241	pp	P12787 (pp) Q9CQ54
14240	pp	P12787 (pp) Q9DC70
14239	pp	P12787 (pp) Q9CPQ1
14238	pp	P12787 (pp) Q9CQJ8
14237	pp	P12787 (pp) Q9CQ69
14236	pp	P12787 (pp) Q9D6J5
14235	pp	P12787 (pp) Q9D0M3
14234	pp	P12787 (pp) Q9DCJ5
14233	pp	P12787 (pp) Q9CQZ5
14232	pp	P12787 (pp) P00405
14231	pp	P12787 (pp) Q9DB20
14230	pp	P12787 (pp) Q9D6J6
14229	pp	P12787 (pp) Q9CQQ7
14228	pp	P12787 (pp) P19783
14227	pp	P12787 (pp) Q9ERS2
14226	pp	P12787 (pp) P56391
14225	pp	P12787 (pp) Q9DCT2
14224	pp	P12787 (pp) P97450
14223	pp	P12787 (pp) Q9DCW4
14222	pp	P12787 (pp) Q9DC69
14221	pp	P12787 (pp) P17665
14220	pp	P12787 (pp) Q8VEM8
14219	pp	P12787 (pp) Q7TMF3
14218	pp	P12787 (pp) Q8K3J1
14217	pp	P12787 (pp) Q9D3D9
14216	pp	P12787 (pp) Q99LC5
14215	pp	P12787 (pp) Q9DCS9
14214	pp	P12787 (pp) Q9D6R2
14213	pp	P12787 (pp) P52503
[truncated: 1,394 more rows]
