# Supplementary material for: APP Is a Context-Sensitive Regulator of the Hippocampal Presynaptic Active Zone
Source: PLOS journal article supplement (doi:10.1371/journal.pcbi.1004832), 2016-04-19
Supplement: S6 (10.1371/journal.pcbi.1004832.s006) [file journal.pcbi.1004832.s006.cys › CytoscapeSession-2016_01_22-10_07/tables/12178-Core+Network+Localization/SHARED_ATTRS-org.cytoscape.model.CyNode-12178+shared+node.cytable]

CyCSV-Version	1
SUID	shared name
java.lang.Long	java.lang.String
12178 shared node
12818	Q00493
12817	Q9R1V4
12816	Q9R0P5
12815	O88342
12814	Q9DB73
12813	O54774
12812	Q8VHW2
12811	P58771
12810	Q03137
12809	Q9QYX7
12808	P23927
12807	Q9EQZ6
12806	P35802
12805	P80560
12804	Q60737
12803	Q9CR95
12802	Q4KMM3
12801	Q9Z0E0
12800	Q812A2
12799	Q9QZF2
12798	Q91ZZ3
12797	Q8K400
12796	Q91WS0
12795	Q9JIA1
12794	O89053
12793	P53994
12792	A2CG49
12791	Q810U4
12790	D3YVF0
12789	Q9ES97
12788	Q9R1V7
12787	Q6URW6
12786	Q9D6K5
12785	Q99KB8
12784	Q9CYT6
12783	Q9D8Y0
12782	Q9Z0P4
12781	Q04447
12780	Q9Z2W9
12779	Q63810
12778	Q61330
12777	P13020
12776	Q8K0T0
12775	Q9CWS0
12774	Q80XN0
12773	P43006
12772	Q9ERD7
12771	Q921J2
12770	Q9CQW1
12769	Q6P9K9
12768	Q9CZW5
12767	P20152
12766	Q8BRT1
12765	Q8BH59
12764	Q921M7
12763	F6SEU4
12762	Q8R366
12761	Q9QYA2
12760	Q61206
12759	Q3ULJ0
12758	Q8CGK3
12757	Q03157
12756	Q8R5C5
12755	Q78IK2
12754	Q91VT4
12753	Q61151
12752	Q3THE2
12751	Q920P5
12750	Q2PFD7
12749	Q7TMM9
12748	Q68FH0
12747	Q91VR7
12746	Q9CR62
12745	Q8CHH9
12744	P97300
12743	Q60634
12742	O08917
12741	Q61316
12740	Q9D1T0
12739	P48036
12738	P11798
12737	Q8K183
12736	Q99NE5
12735	Q9CR16
12734	P57780
12733	Q9QY76
12732	P23242
12731	Q9R1V6
12730	P48758
12729	Q91XV3
12728	P55302
12727	Q8BIJ6
12726	O88643
12725	Q80TZ3
12724	Q7TMB8
12723	Q9WV55
12722	O55131
12721	O35136
12720	Q7TSJ2
12719	P12960
12718	Q61699
12717	P08553
12716	Q8K4Z3
12715	P08551
12714	Q8VDQ8
12713	O54983
12712	P40124
12711	P18760
12710	Q9Z2I0
12709	Q9Z2Q6
12708	Q9WV34
12707	P42208
12706	P28661
12705	P26645
12704	P84096
12703	O35143
12702	P48722
12701	P63321
12700	Q8K021
12699	Q8CI94
12698	P48962
12697	Q71LX4
12696	P43406
12695	Q9D880
12694	O35857
12693	Q9CWZ7
12692	P28740
12691	Q922H2
12690	P46096
12689	Q61490
12688	Q9CZ42
12687	P35564
12686	P19096
12685	Q61644
12684	Q8BZ98
12683	Q5RJI5
12682	O55100
12681	P61164
12680	Q8R191
12679	O35643
12678	Q99P72
12677	Q60930
12676	P20444
12675	Q9QXS1
12674	O08599
12673	Q8BW75
12672	O35239
12671	Q5DQR4
12670	Q9EPJ9
12669	P00405
12668	P56564
12667	P70296
12666	P63318
12665	P27546
12664	P58281
12663	Q8R3V5
12662	P67871
12661	Q810U3
12660	Q61553
12659	Q80U28
12658	P19246
12657	P62743
12656	P22723
12655	Q60605
12654	P47708
12653	Q8VBV7
12652	Q9DC28
12651	P35279
12650	Q9CRB9
12649	Q9CQI6
12648	P62821
12647	P50396
12646	Q9WU78
12645	P0C0A3
12644	Q9R0P9
12643	Q80UU9
12642	O55023
12641	Q60875
12640	Q61411
12639	Q8CHC4
12638	Q91VZ6
12637	Q9WUB3
12636	Q62465
12635	Q9D0F9
12634	Q9R111
12633	Q6PIC6
12632	Q80VP1
12631	P68181
12630	P28663
12629	Q6P1F6
12628	P41216
12627	Q9D6F9
12626	Q99PJ0
12625	Q99MR8
12624	Q8BH04
12623	Q8BWF0
12622	Q91WC3
12621	Q3UVX5
12620	P20357
12619	P01831
12618	Q9D8B3
12617	P28667
12616	O55042
12615	P63328
12614	Q91ZJ5
12613	P60469
12612	Q62419
12611	P45376
12610	O54991
12609	B9EKR1
12608	Q9QYR6
12607	O08585
12606	Q60932
12605	Q3UHL1
12604	Q9CPQ1
12603	Q5SQX6
12602	Q80Y14
12601	Q9Z0R4
12600	P00493
12599	P60761
12598	Q64332
12597	O70318
12596	O08539
12595	Q9CS84
12594	P40630
12593	Q9JIS5
12592	Q8BYM5
12591	Q4ACU6
12590	P48453
12589	Q925I1
12588	Q62261
12587	Q9R0N7
12586	Q60996
12585	P62482
12584	P30999
12583	Q68FF6
12582	P23818
12581	Q9DBJ1
12580	P68254
12579	P62204
12578	P17156
12577	Q99K85
12576	P28652
12575	P70414
12574	Q6PIE5
12573	P47802
12572	Q9R0Y5
12571	P68033
12570	Q9QXJ1
12569	P84091
12568	Q9Z218
12567	P99024
12566	P03995
12565	P16330
12564	O70589
12563	Q8BKX1
12562	P13595
12561	P11627
12560	P62746
12559	P16858
12558	Q8VD37
12557	Q8QZT1
12556	Q60931
12555	P17665
12554	Q9JLZ3
12553	Q8CAQ8
12552	Q99L43
12551	Q8VDP6
12550	Q9Z0X1
12549	P61161
12548	Q60598
12547	P63011
12546	P38647
12545	Q62425
12544	Q8BMF3
12543	Q9Z1J3
12542	Q9DCB8
12541	O88712
12540	Q8BHL5
12539	Q9QXS6
12538	P17183
12537	Q6IRU5
12536	Q9DBG3
12535	P55088
12534	P10637
12533	Q922R8
12532	P68368
12531	P47857
12530	Q9D6M3
12529	Q62048
12528	Q99104
12527	P60766
12526	Q6R891
12525	P62835
12524	Q8BLK3
12523	Q91ZX7
12522	P08226
12521	Q8R0S4
12520	Q61290
12519	P42125
12518	Q8BGD5
12517	Q9Z268
12516	Q8BMS1
12515	P17182
12514	Q9CPW4
12513	Q8BKZ9
12512	P05063
12511	Q60597
12510	Q9WUA3
12509	P61982
12508	P07901
12507	P06837
12506	P15116
12505	Q7TQF7
12504	Q99L47
12503	P29758
12502	Q8CHT0
12501	P97772
12500	Q8BR92
12499	P31324
12498	Q6PB66
12497	P39053
12496	Q6PH08
12495	O88737
12494	Q9CQC7
12493	Q9CVB6
12492	P59999
12491	Q8CHU3
12490	Q5FWK3
12489	Q9WTT4
12488	Q00612
12487	Q9D6J5
12486	P23506
12485	Q6PCP5
12484	Q8VDN2
12483	Q64516
12482	Q9DBF1
12481	Q8R001
12480	Q9QWI6
12479	P63101
12478	Q61879
12477	Q91ZA3
12476	Q3UMR5
12475	P56382
12474	P09103
12473	P14873
12472	P43024
12471	Q62420
12470	Q9EP69
12469	P26040
12468	P70441
12467	P61264
12466	Q7TPR4
12465	Q3UTJ2
12464	P06745
12463	Q920I9
12462	Q923T9
12461	P63040
12460	Q61831
12459	P50544
12458	Q9Z2I9
12457	Q61301
12456	Q9DB05
12455	P52480
12454	Q93092
12453	Q9JHI5
12452	P53395
12451	Q9DBL1
12450	Q8K1M6
12449	Q9CQ92
12448	P63082
12447	Q8BPN8
12446	O35465
12445	P18572
12444	P09671
12443	P16054
12442	P62962
12441	Q61102
12440	P22315
12439	P35486
12438	Q9CZT8
12437	P47754
12436	P14094
12435	Q99JY9
12434	Q99MN9
12433	Q99PT1
12432	P62823
12431	O88935
12430	P97450
12429	Q64010
12428	Q9JLM8
12427	P20108
12426	Q9QUH0
12425	Q64521
12424	P13707
12423	Q9R0K7
12422	Q80T41
12421	Q9D898
12420	P63017
12419	P45878
12418	Q61548
12417	P12367
12416	Q9D023
12415	P56379
12414	P18052
12413	P70232
12412	Q9CZS1
12411	O35129
12410	O88696
12409	Q9CQQ7
12408	Q9JJV2
12407	Q9DC69
12406	Q91VM9
12405	Q9DB77
12404	Q8K3J1
12403	Q9D855
12402	Q9JHU4
12401	P46660
12400	P63044
12399	Q62351
12398	P63001
12397	Q8BG51
12396	Q9CXZ1
12395	Q60676
12394	Q8JZN5
12393	Q8JZQ2
12392	P51174
12391	Q8VDD5
12390	P18872
12389	Q9CQ75
12388	P03930
12387	P49615
12386	P39688
12385	P04925
12384	Q99JY0
12383	O08756
12382	P28660
12381	P60879
12380	Q9DCJ5
12379	Q91YT0
12378	Q9JM76
12377	Q9R0Q6
12376	Q68FD5
12375	Q9QYJ0
12374	Q60864
12373	P19536
12372	Q99N28
12371	Q9JLB0
12370	Q8BVE3
12369	P50518
12368	P97797
12367	Q61735
12366	Q9DCX2
12365	Q7TMF3
12364	O35658
12363	Q99KR7
12362	Q9EQ20
12361	P62874
12360	P63213
12359	P40142
12358	Q9CQR4
12357	Q9CQV8
12356	P99029
12355	P62073
12354	Q62277
12353	Q60631
12352	P52503
12351	Q8R4N0
12350	Q3ULD5
12349	Q8VEM8
12348	P68369
12347	Q8K2B3
12346	Q91WD5
12345	P51881
12344	P05480
12343	Q02248
12342	P60710
12341	Q6PHZ2
12340	P97807
12339	Q9ERS2
12338	Q99KI0
12337	O08788
12336	Q99KJ8
12335	Q91Z53
12334	P26443
12333	Q62442
12332	Q9D172
12331	P56391
12330	Q9WV18
12329	O35526
12328	Q8R5M8
12327	Q9WV92
12326	P62814
12325	P12023
12324	P61922
12323	P48320
12322	P17710
12321	P05064
12320	P11499
12319	Q8K1Z0
12318	P62331
12317	Q99LX0
12316	Q8BGH2
12315	Q99LC5
12314	Q61425
12313	P12787
12312	Q9CQA3
12311	Q8BWT1
12310	Q921G7
12309	Q9Z1B3
12308	O70161
12307	Q6PER3
12306	P63005
12305	P47738
12304	Q64133
12303	P48771
12302	O70325
12301	P62812
12300	P63137
12299	Q9Z1P6
12298	P09411
12297	P17751
12296	Q7TQI3
12295	O88441
12294	P70404
12293	P50516
12292	P57746
12291	P17426
12290	P17427
12289	P31938
12288	Q3UIU2
12287	Q9D2G2
12286	P62897
12285	Q9CQ62
12284	Q08331
12283	P46460
12282	P15105
12281	Q9CPP6
12280	Q9DCW4
12279	P63037
12278	Q9CQN1
12277	Q9D0K2
12276	Q9WUM5
12275	Q9Z1G4
12274	Q9D1K2
12273	Q9D0S9
12272	Q9DC70
12271	Q06185
12270	Q9CQJ8
12269	P05132
12268	P52196
12267	Q9CR68
12266	Q9DCS9
12265	Q91VD9
12264	Q9CPQ8
12263	Q91VR2
12262	Q9JLJ2
12261	P67778
12260	P68404
12259	P17742
12258	P56480
12257	Q61598
12256	P61027
12255	P63085
12254	Q05920
12253	Q8BMF4
12252	Q99LY9
12251	Q99LC3
12250	Q9D0M3
12249	Q9CZ13
12248	Q8BH95
12247	P63038
12246	Q8BK64
12245	P19783
12244	O88952
12243	Q6P9K8
12242	Q9Z2H5
12241	Q3UHD9
12240	Q9CQH3
12239	Q9DB20
12238	P06151
12237	P54071
12236	Q9D6R2
12235	P08249
12234	Q9CQ69
12233	Q9DCT2
12232	Q9CQ54
12231	Q9CQZ6
12230	Q76MZ3
12229	P63330
12228	P16546
12227	Q8C8R3
12226	P47757
12225	P62259
12224	Q9Z1G3
12223	P51863
12222	Q9DCD0
12221	Q9CZU6
12220	P35436
12219	P23819
12218	Q06335
12217	Q9QUI0
12216	P05202
12215	P35438
12214	P12382
12213	P68510
12212	Q03265
12211	O09111
12210	Q9D3D9
12209	Q9D051
12208	O08749
12207	Q9D6J6
12206	Q9CQZ5
12205	Q80Z38
12204	Q01097
