# Supplementary material for: APP Is a Context-Sensitive Regulator of the Hippocampal Presynaptic Active Zone
Source: PLOS journal article supplement (doi:10.1371/journal.pcbi.1004832), 2016-04-19
Supplement: S6 (10.1371/journal.pcbi.1004832.s006) [file journal.pcbi.1004832.s006.cys › CytoscapeSession-2016_01_22-10_07/tables/12194-Localization/HIDDEN-org.cytoscape.model.CyEdge-12194+hidden+edge.cytable]

"CyCSV-Version","1"
"SUID"
"java.lang.Long"
""
"12194 hidden edge",""
"16208"
"16207"
"16206"
"16205"
"16204"
"16203"
"16202"
"16201"
"16200"
"16199"
"16198"
"16197"
"16196"
"16195"
"16194"
"16193"
"16192"
"16191"
"16190"
"16189"
"16188"
"16187"
"16186"
"16185"
"16184"
"16183"
"16182"
"16181"
"16180"
"16179"
"16178"
"16177"
"16176"
"16175"
"16174"
"16173"
"16172"
"16171"
"16170"
"16169"
"16168"
"16167"
"16166"
"16165"
"16164"
"16163"
"16162"
"16161"
"16160"
"16159"
"16158"
"16157"
"16156"
"16155"
"16154"
"16153"
"16152"
"16151"
"16150"
"16149"
"16148"
"16147"
"16146"
"16145"
"16144"
"16143"
"16142"
"16141"
"16140"
"16139"
"16138"
"16137"
"16136"
"16135"
"16134"
"16133"
"16132"
"16131"
"16130"
"16129"
"16128"
"16127"
"16126"
"16125"
"16124"
"16123"
"16122"
"16121"
"16120"
"16119"
"16118"
"16117"
"16116"
"16115"
"16114"
"16113"
"16112"
"16111"
"16110"
"16109"
"16108"
"16107"
"16106"
"16105"
"16104"
"16103"
"16102"
"16101"
"16100"
"16099"
"16098"
"16097"
"16096"
"16095"
"16094"
"16093"
"16092"
"16091"
"16090"
"16089"
"16088"
"16087"
"16086"
"16085"
"16084"
"16083"
"16082"
"16081"
"16080"
"16079"
"16078"
"16077"
"16076"
"16075"
"16074"
"16073"
"16072"
"16071"
"16070"
"16069"
"16068"
"16067"
"16066"
"16065"
"16064"
"16063"
"16062"
"16061"
"16060"
"16059"
"16058"
"16057"
"16056"
"16055"
"16054"
"16053"
"16052"
"16051"
"16050"
"16049"
"16048"
"16047"
"16046"
"16045"
"16044"
"16043"
"16042"
"16041"
"16040"
"16039"
"16038"
"16037"
"16036"
"16035"
"16034"
"16033"
"16032"
"16031"
"16030"
"16029"
"16028"
"16027"
"16026"
"16025"
"16024"
"16023"
"16022"
"16021"
"16020"
"16019"
"16018"
"16017"
"16016"
"16015"
"16014"
"16013"
"16012"
"16011"
"16010"
"16009"
"16008"
"16007"
"16006"
"16005"
"16004"
"16003"
"16002"
"16001"
"16000"
"15999"
"15998"
"15997"
"15996"
"15995"
"15994"
"15993"
"15992"
"15991"
"15990"
"15989"
"15988"
"15987"
"15986"
"15985"
"15984"
"15983"
"15982"
"15981"
"15980"
"15979"
"15978"
"15977"
"15976"
"15975"
"15974"
"15973"
"15972"
"15971"
"15970"
"15969"
"15968"
"15967"
"15966"
"15965"
"15964"
"15963"
"15962"
"15961"
"15960"
"15959"
"15958"
"15957"
"15956"
"15955"
"15954"
"15953"
"15952"
"15951"
"15950"
"15949"
"15948"
"15947"
"15946"
"15945"
"15944"
"15943"
"15942"
"15941"
"15940"
"15939"
"15938"
"15937"
"15936"
"15935"
"15934"
"15933"
"15932"
"15931"
"15930"
"15929"
"15928"
"15927"
"15926"
"15925"
"15924"
"15923"
"15922"
"15921"
"15920"
"15919"
"15918"
"15917"
"15916"
"15915"
"15914"
"15913"
"15912"
"15911"
"15910"
"15909"
"15908"
"15907"
"15906"
"15905"
"15904"
"15903"
"15902"
"15901"
"15900"
"15899"
"15898"
"15897"
"15896"
"15895"
"15894"
"15893"
"15892"
"15891"
"15890"
"15889"
"15888"
"15887"
"15886"
"15885"
"15884"
"15883"
"15882"
"15881"
"15880"
"15879"
"15878"
"15877"
"15876"
"15875"
"15874"
"15873"
"15872"
"15871"
"15870"
"15869"
"15868"
"15867"
"15866"
"15865"
"15864"
"15863"
"15862"
"15861"
"15860"
"15859"
"15858"
"15857"
"15856"
"15855"
"15854"
"15853"
"15852"
"15851"
"15850"
"15849"
"15848"
"15847"
"15846"
"15845"
"15844"
"15843"
"15842"
"15841"
"15840"
"15839"
"15838"
"15837"
"15836"
"15835"
"15834"
"15833"
"15832"
"15831"
"15830"
"15829"
"15828"
"15827"
"15826"
"15825"
"15824"
"15823"
"15822"
"15821"
"15820"
"15819"
"15818"
"15817"
"15816"
"15815"
"15814"
"15813"
"15812"
"15811"
"15810"
"15809"
"15808"
"15807"
"15806"
"15805"
"15804"
"15803"
"15802"
"15801"
"15800"
"15799"
"15798"
"15797"
"15796"
"15795"
"15794"
"15793"
"15792"
"15791"
"15790"
"15789"
"15788"
"15787"
"15786"
"15785"
"15784"
"15783"
"15782"
"15781"
"15780"
"15779"
"15778"
"15777"
"15776"
"15775"
"15774"
"15773"
"15772"
"15771"
"15770"
"15769"
"15768"
"15767"
"15766"
"15765"
"15764"
"15763"
"15762"
"15761"
"15760"
"15759"
"15758"
"15757"
"15756"
"15755"
"15754"
"15753"
"15752"
"15751"
"15750"
"15749"
"15748"
"15747"
"15746"
"15745"
"15744"
"15743"
"15742"
"15741"
"15740"
"15739"
"15738"
"15737"
"15736"
"15735"
"15734"
"15733"
"15732"
"15731"
"15730"
"15729"
"15728"
"15727"
"15726"
"15725"
"15724"
"15723"
"15722"
"15721"
"15720"
"15719"
"15718"
"15717"
"15716"
"15715"
"15714"
"15713"
"15712"
"15711"
"15710"
"15709"
"15708"
"15707"
"15706"
"15705"
"15704"
"15703"
"15702"
"15701"
"15700"
"15699"
"15698"
"15697"
"15696"
"15695"
"15694"
"15693"
"15692"
"15691"
"15690"
"15689"
"15688"
"15687"
"15686"
"15685"
"15684"
"15683"
"15682"
"15681"
"15680"
"15679"
"15678"
"15677"
"15676"
"15675"
"15674"
"15673"
"15672"
"15671"
"15670"
"15669"
"15668"
"15667"
"15666"
"15665"
"15664"
"15663"
"15662"
"15661"
"15660"
"15659"
"15658"
"15657"
"15656"
"15655"
"15654"
"15653"
"15652"
"15651"
"15650"
"15649"
"15648"
"15647"
"15646"
"15645"
"15644"
"15643"
"15642"
"15641"
"15640"
"15639"
"15638"
"15637"
"15636"
"15635"
"15634"
"15633"
"15632"
"15631"
"15630"
"15629"
"15628"
"15627"
"15626"
"15625"
"15624"
"15623"
"15622"
"15621"
"15620"
"15619"
"15618"
"15617"
"15616"
"15615"
"15614"
"15613"
"15612"
"15611"
"15610"
"15609"
"15608"
"15607"
"15606"
"15605"
"15604"
"15603"
"15602"
"15601"
"15600"
"15599"
"15598"
"15597"
"15596"
"15595"
"15594"
"15593"
"15592"
"15591"
"15590"
"15589"
"15588"
"15587"
"15586"
"15585"
"15584"
"15583"
"15582"
"15581"
"15580"
"15579"
"15578"
"15577"
"15576"
"15575"
"15574"
"15573"
"15572"
"15571"
"15570"
"15569"
"15568"
"15567"
"15566"
"15565"
"15564"
"15563"
"15562"
"15561"
"15560"
"15559"
"15558"
"15557"
"15556"
"15555"
"15554"
"15553"
"15552"
"15551"
"15550"
"15549"
"15548"
"15547"
"15546"
"15545"
"15544"
"15543"
"15542"
"15541"
"15540"
"15539"
"15538"
"15537"
"15536"
"15535"
"15534"
"15533"
"15532"
"15531"
"15530"
"15529"
"15528"
"15527"
"15526"
"15525"
"15524"
"15523"
"15522"
"15521"
"15520"
"15519"
"15518"
"15517"
"15516"
"15515"
"15514"
"15513"
"15512"
"15511"
"15510"
"15509"
"15508"
"15507"
"15506"
"15505"
"15504"
"15503"
"15502"
"15501"
"15500"
"15499"
"15498"
"15497"
"15496"
"15495"
"15494"
"15493"
"15492"
"15491"
"15490"
"15489"
"15488"
"15487"
"15486"
"15485"
"15484"
"15483"
"15482"
"15481"
"15480"
"15479"
"15478"
"15477"
"15476"
"15475"
"15474"
"15473"
"15472"
"15471"
"15470"
"15469"
"15468"
"15467"
"15466"
"15465"
"15464"
"15463"
"15462"
"15461"
"15460"
"15459"
"15458"
"15457"
"15456"
"15455"
"15454"
"15453"
"15452"
"15451"
"15450"
"15449"
"15448"
"15447"
"15446"
"15445"
"15444"
"15443"
"15442"
"15441"
"15440"
"15439"
"15438"
"15437"
"15436"
"15435"
"15434"
"15433"
"15432"
"15431"
"15430"
"15429"
"15428"
"15427"
"15426"
"15425"
"15424"
"15423"
"15422"
"15421"
"15420"
"15419"
"15418"
"15417"
"15416"
"15415"
"15414"
"15413"
"15412"
"15411"
"15410"
"15409"
"15408"
"15407"
"15406"
"15405"
"15404"
"15403"
"15402"
"15401"
"15400"
"15399"
"15398"
"15397"
"15396"
"15395"
"15394"
"15393"
"15392"
"15391"
"15390"
"15389"
"15388"
"15387"
"15386"
"15385"
"15384"
"15383"
"15382"
"15381"
"15380"
"15379"
"15378"
"15377"
"15376"
"15375"
"15374"
"15373"
"15372"
"15371"
"15370"
"15369"
"15368"
"15367"
"15366"
"15365"
"15364"
"15363"
"15362"
"15361"
"15360"
"15359"
"15358"
"15357"
"15356"
"15355"
"15354"
"15353"
"15352"
"15351"
"15350"
"15349"
"15348"
"15347"
"15346"
"15345"
"15344"
"15343"
"15342"
"15341"
"15340"
"15339"
"15338"
"15337"
"15336"
"15335"
"15334"
"15333"
"15332"
"15331"
"15330"
"15329"
"15328"
"15327"
"15326"
"15325"
"15324"
"15323"
"15322"
"15321"
"15320"
"15319"
"15318"
"15317"
"15316"
"15315"
"15314"
"15313"
"15312"
"15311"
"15310"
"15309"
"15308"
"15307"
"15306"
"15305"
"15304"
"15303"
"15302"
"15301"
"15300"
"15299"
"15298"
"15297"
"15296"
"15295"
"15294"
"15293"
"15292"
"15291"
"15290"
"15289"
"15288"
"15287"
"15286"
"15285"
"15284"
"15283"
"15282"
"15281"
"15280"
"15279"
"15278"
"15277"
"15276"
"15275"
"15274"
"15273"
"15272"
"15271"
"15270"
"15269"
"15268"
"15267"
"15266"
"15265"
"15264"
"15263"
"15262"
"15261"
"15260"
"15259"
"15258"
"15257"
"15256"
"15255"
"15254"
"15253"
"15252"
"15251"
"15250"
"15249"
"15248"
"15247"
"15246"
"15245"
"15244"
"15243"
"15242"
"15241"
"15240"
"15239"
"15238"
"15237"
"15236"
"15235"
"15234"
"15233"
"15232"
"15231"
"15230"
"15229"
"15228"
"15227"
"15226"
"15225"
"15224"
"15223"
"15222"
"15221"
"15220"
"15219"
"15218"
"15217"
"15216"
"15215"
"15214"
"15213"
"15212"
"15211"
"15210"
"15209"
"15208"
"15207"
"15206"
"15205"
"15204"
"15203"
"15202"
"15201"
"15200"
"15199"
"15198"
"15197"
"15196"
"15195"
"15194"
"15193"
"15192"
"15191"
"15190"
"15189"
"15188"
"15187"
"15186"
"15185"
"15184"
"15183"
"15182"
"15181"
"15180"
"15179"
"15178"
"15177"
"15176"
"15175"
"15174"
"15173"
"15172"
"15171"
"15170"
"15169"
"15168"
"15167"
"15166"
"15165"
"15164"
"15163"
"15162"
"15161"
"15160"
"15159"
"15158"
"15157"
"15156"
"15155"
"15154"
"15153"
"15152"
"15151"
"15150"
"15149"
"15148"
"15147"
"15146"
"15145"
"15144"
"15143"
"15142"
"15141"
"15140"
"15139"
"15138"
"15137"
"15136"
"15135"
"15134"
"15133"
"15132"
"15131"
"15130"
"15129"
"15128"
"15127"
"15126"
"15125"
"15124"
"15123"
"15122"
"15121"
"15120"
"15119"
"15118"
"15117"
"15116"
"15115"
"15114"
"15113"
"15112"
"15111"
"15110"
"15109"
"15108"
"15107"
"15106"
"15105"
"15104"
"15103"
"15102"
"15101"
"15100"
"15099"
"15098"
"15097"
"15096"
"15095"
"15094"
"15093"
"15092"
"15091"
"15090"
"15089"
"15088"
"15087"
"15086"
"15085"
"15084"
"15083"
"15082"
"15081"
"15080"
"15079"
"15078"
"15077"
"15076"
"15075"
"15074"
"15073"
"15072"
"15071"
"15070"
"15069"
"15068"
"15067"
"15066"
"15065"
"15064"
"15063"
"15062"
"15061"
"15060"
"15059"
"15058"
"15057"
"15056"
"15055"
"15054"
"15053"
"15052"
"15051"
"15050"
"15049"
"15048"
"15047"
"15046"
"15045"
"15044"
"15043"
"15042"
"15041"
"15040"
"15039"
"15038"
"15037"
"15036"
"15035"
"15034"
"15033"
"15032"
"15031"
"15030"
"15029"
"15028"
"15027"
"15026"
"15025"
"15024"
"15023"
"15022"
"15021"
"15020"
"15019"
"15018"
"15017"
"15016"
"15015"
"15014"
"15013"
"15012"
"15011"
"15010"
"15009"
"15008"
"15007"
"15006"
"15005"
"15004"
"15003"
"15002"
"15001"
"15000"
"14999"
"14998"
"14997"
"14996"
"14995"
"14994"
"14993"
"14992"
"14991"
"14990"
"14989"
"14988"
"14987"
"14986"
"14985"
"14984"
"14983"
"14982"
"14981"
"14980"
"14979"
"14978"
"14977"
"14976"
"14975"
"14974"
"14973"
"14972"
"14971"
"14970"
"14969"
"14968"
"14967"
"14966"
"14965"
"14964"
"14963"
"14962"
"14961"
"14960"
"14959"
"14958"
"14957"
"14956"
"14955"
"14954"
"14953"
"14952"
"14951"
"14950"
"14949"
"14948"
"14947"
"14946"
"14945"
"14944"
"14943"
"14942"
"14941"
"14940"
"14939"
"14938"
"14937"
"14936"
"14935"
"14934"
"14933"
"14932"
"14931"
"14930"
"14929"
"14928"
"14927"
"14926"
"14925"
"14924"
"14923"
"14922"
"14921"
"14920"
"14919"
"14918"
"14917"
"14916"
"14915"
"14914"
"14913"
"14912"
"14911"
"14910"
"14909"
"14908"
"14907"
"14906"
"14905"
"14904"
"14903"
"14902"
"14901"
"14900"
"14899"
"14898"
"14897"
"14896"
"14895"
"14894"
"14893"
"14892"
"14891"
"14890"
"14889"
"14888"
"14887"
"14886"
"14885"
"14884"
"14883"
"14882"
"14881"
"14880"
"14879"
"14878"
"14877"
"14876"
"14875"
"14874"
"14873"
"14872"
"14871"
"14870"
"14869"
"14868"
"14867"
"14866"
"14865"
"14864"
"14863"
"14862"
"14861"
"14860"
"14859"
"14858"
"14857"
"14856"
"14855"
"14854"
"14853"
"14852"
"14851"
"14850"
"14849"
"14848"
"14847"
"14846"
"14845"
"14844"
"14843"
"14842"
"14841"
"14840"
"14839"
"14838"
"14837"
"14836"
"14835"
"14834"
"14833"
"14832"
"14831"
"14830"
"14829"
"14828"
"14827"
"14826"
"14825"
"14824"
"14823"
"14822"
"14821"
"14820"
"14819"
"14818"
"14817"
"14816"
"14815"
"14814"
"14813"
"14812"
"14811"
"14810"
"14809"
"14808"
"14807"
"14806"
"14805"
"14804"
"14803"
"14802"
"14801"
"14800"
"14799"
"14798"
"14797"
"14796"
"14795"
"14794"
"14793"
"14792"
"14791"
"14790"
"14789"
"14788"
"14787"
"14786"
"14785"
"14784"
"14783"
"14782"
"14781"
"14780"
"14779"
"14778"
"14777"
"14776"
"14775"
"14774"
"14773"
"14772"
"14771"
"14770"
"14769"
"14768"
"14767"
"14766"
"14765"
"14764"
"14763"
"14762"
"14761"
"14760"
"14759"
"14758"
"14757"
"14756"
"14755"
"14754"
"14753"
"14752"
"14751"
"14750"
"14749"
"14748"
"14747"
"14746"
"14745"
"14744"
"14743"
"14742"
"14741"
"14740"
"14739"
"14738"
"14737"
"14736"
"14735"
"14734"
"14733"
"14732"
"14731"
"14730"
"14729"
"14728"
"14727"
"14726"
"14725"
"14724"
"14723"
"14722"
"14721"
"14720"
"14719"
"14718"
"14717"
"14716"
"14715"
"14714"
"14713"
"14712"
"14711"
"14710"
"14709"
"14708"
"14707"
"14706"
"14705"
"14704"
"14703"
"14702"
"14701"
"14700"
"14699"
"14698"
"14697"
"14696"
"14695"
"14694"
"14693"
"14692"
"14691"
"14690"
"14689"
"14688"
"14687"
"14686"
"14685"
"14684"
"14683"
"14682"
"14681"
"14680"
"14679"
"14678"
"14677"
"14676"
"14675"
"14674"
"14673"
"14672"
"14671"
"14670"
"14669"
"14668"
"14667"
"14666"
"14665"
"14664"
"14663"
"14662"
"14661"
"14660"
"14659"
"14658"
"14657"
"14656"
"14655"
"14654"
"14653"
"14652"
"14651"
"14650"
"14649"
"14648"
"14647"
"14646"
"14645"
"14644"
"14643"
"14642"
"14641"
"14640"
"14639"
"14638"
"14637"
"14636"
"14635"
"14634"
"14633"
"14632"
"14631"
"14630"
"14629"
"14628"
"14627"
"14626"
"14625"
"14624"
"14623"
"14622"
"14621"
"14620"
"14619"
"14618"
"14617"
"14616"
"14615"
"14614"
"14613"
"14612"
"14611"
"14610"
"14609"
"14608"
"14607"
"14606"
"14605"
"14604"
"14603"
"14602"
"14601"
"14600"
"14599"
"14598"
"14597"
"14596"
"14595"
"14594"
"14593"
"14592"
"14591"
"14590"
"14589"
"14588"
"14587"
"14586"
"14585"
"14584"
"14583"
"14582"
"14581"
"14580"
"14579"
"14578"
"14577"
"14576"
"14575"
"14574"
"14573"
"14572"
"14571"
"14570"
"14569"
"14568"
"14567"
"14566"
"14565"
"14564"
"14563"
"14562"
"14561"
"14560"
"14559"
"14558"
"14557"
"14556"
"14555"
"14554"
"14553"
"14552"
"14551"
"14550"
"14549"
"14548"
"14547"
"14546"
"14545"
"14544"
"14543"
"14542"
"14541"
"14540"
"14539"
"14538"
"14537"
"14536"
"14535"
"14534"
"14533"
"14532"
"14531"
"14530"
"14529"
"14528"
"14527"
"14526"
"14525"
"14524"
"14523"
"14522"
"14521"
"14520"
"14519"
"14518"
"14517"
"14516"
"14515"
"14514"
"14513"
"14512"
"14511"
"14510"
"14509"
"14508"
"14507"
"14506"
"14505"
"14504"
"14503"
"14502"
"14501"
"14500"
"14499"
"14498"
"14497"
"14496"
"14495"
"14494"
"14493"
"14492"
"14491"
"14490"
"14489"
"14488"
"14487"
"14486"
"14485"
"14484"
"14483"
"14482"
"14481"
"14480"
"14479"
"14478"
"14477"
"14476"
"14475"
"14474"
"14473"
"14472"
"14471"
"14470"
"14469"
"14468"
"14467"
"14466"
"14465"
"14464"
"14463"
"14462"
"14461"
"14460"
"14459"
"14458"
"14457"
"14456"
"14455"
"14454"
"14453"
"14452"
"14451"
"14450"
"14449"
"14448"
"14447"
"14446"
"14445"
"14444"
"14443"
"14442"
"14441"
"14440"
"14439"
"14438"
"14437"
"14436"
"14435"
"14434"
"14433"
"14432"
"14431"
"14430"
"14429"
"14428"
"14427"
"14426"
"14425"
"14424"
"14423"
"14422"
"14421"
"14420"
"14419"
"14418"
"14417"
"14416"
"14415"
"14414"
"14413"
"14412"
"14411"
"14410"
"14409"
"14408"
"14407"
"14406"
"14405"
"14404"
"14403"
"14402"
"14401"
"14400"
"14399"
"14398"
"14397"
"14396"
"14395"
"14394"
"14393"
"14392"
"14391"
"14390"
"14389"
"14388"
"14387"
"14386"
"14385"
"14384"
"14383"
"14382"
"14381"
"14380"
"14379"
"14378"
"14377"
"14376"
"14375"
"14374"
"14373"
"14372"
"14371"
"14370"
"14369"
"14368"
"14367"
"14366"
"14365"
"14364"
"14363"
"14362"
"14361"
"14360"
"14359"
"14358"
"14357"
"14356"
"14355"
"14354"
"14353"
"14352"
"14351"
"14350"
"14349"
"14348"
"14347"
"14346"
"14345"
"14344"
"14343"
"14342"
"14341"
"14340"
"14339"
"14338"
"14337"
"14336"
"14335"
"14334"
"14333"
"14332"
"14331"
"14330"
"14329"
"14328"
"14327"
"14326"
"14325"
"14324"
"14323"
"14322"
"14321"
"14320"
"14319"
"14318"
"14317"
"14316"
"14315"
"14314"
"14313"
"14312"
"14311"
"14310"
"14309"
"14308"
"14307"
"14306"
"14305"
"14304"
"14303"
"14302"
"14301"
"14300"
"14299"
"14298"
"14297"
"14296"
"14295"
"14294"
"14293"
"14292"
"14291"
"14290"
"14289"
"14288"
"14287"
"14286"
"14285"
"14284"
"14283"
"14282"
"14281"
"14280"
"14279"
"14278"
"14277"
"14276"
"14275"
"14274"
"14273"
"14272"
"14271"
"14270"
"14269"
"14268"
"14267"
"14266"
"14265"
"14264"
"14263"
"14262"
"14261"
"14260"
"14259"
"14258"
"14257"
"14256"
"14255"
"14254"
"14253"
"14252"
"14251"
"14250"
"14249"
"14248"
"14247"
"14246"
"14245"
"14244"
"14243"
"14242"
"14241"
"14240"
"14239"
"14238"
"14237"
"14236"
"14235"
"14234"
"14233"
"14232"
"14231"
"14230"
"14229"
"14228"
"14227"
"14226"
"14225"
"14224"
"14223"
"14222"
"14221"
"14220"
"14219"
"14218"
"14217"
"14216"
"14215"
"14214"
"14213"
"14212"
"14211"
"14210"
"14209"
"14208"
"14207"
"14206"
"14205"
"14204"
"14203"
"14202"
"14201"
"14200"
"14199"
"14198"
"14197"
"14196"
"14195"
"14194"
"14193"
"14192"
"14191"
"14190"
"14189"
"14188"
"14187"
"14186"
"14185"
"14184"
"14183"
"14182"
"14181"
"14180"
"14179"
"14178"
"14177"
"14176"
"14175"
"14174"
"14173"
"14172"
"14171"
"14170"
"14169"
"14168"
"14167"
"14166"
"14165"
"14164"
"14163"
"14162"
"14161"
"14160"
"14159"
"14158"
"14157"
"14156"
"14155"
"14154"
"14153"
"14152"
"14151"
"14150"
"14149"
"14148"
"14147"
"14146"
"14145"
"14144"
"14143"
"14142"
"14141"
"14140"
"14139"
"14138"
"14137"
"14136"
"14135"
"14134"
"14133"
"14132"
"14131"
"14130"
"14129"
"14128"
"14127"
"14126"
"14125"
"14124"
"14123"
"14122"
"14121"
"14120"
"14119"
"14118"
"14117"
"14116"
"14115"
"14114"
"14113"
"14112"
"14111"
"14110"
"14109"
"14108"
"14107"
"14106"
"14105"
"14104"
"14103"
"14102"
"14101"
"14100"
"14099"
"14098"
"14097"
"14096"
"14095"
"14094"
"14093"
"14092"
"14091"
"14090"
"14089"
"14088"
"14087"
"14086"
"14085"
"14084"
"14083"
"14082"
"14081"
"14080"
"14079"
"14078"
"14077"
"14076"
"14075"
"14074"
"14073"
"14072"
"14071"
"14070"
"14069"
"14068"
"14067"
"14066"
"14065"
"14064"
"14063"
"14062"
"14061"
"14060"
"14059"
"14058"
"14057"
"14056"
"14055"
"14054"
"14053"
"14052"
"14051"
"14050"
"14049"
"14048"
"14047"
"14046"
"14045"
"14044"
"14043"
"14042"
"14041"
"14040"
"14039"
"14038"
"14037"
"14036"
"14035"
"14034"
"14033"
"14032"
"14031"
"14030"
"14029"
"14028"
"14027"
"14026"
"14025"
"14024"
"14023"
"14022"
"14021"
"14020"
"14019"
"14018"
"14017"
"14016"
"14015"
"14014"
"14013"
"14012"
"14011"
"14010"
"14009"
"14008"
"14007"
"14006"
"14005"
"14004"
"14003"
"14002"
"14001"
"14000"
"13999"
"13998"
"13997"
"13996"
"13995"
"13994"
"13993"
"13992"
"13991"
"13990"
"13989"
"13988"
"13987"
"13986"
"13985"
"13984"
"13983"
"13982"
"13981"
"13980"
"13979"
"13978"
"13977"
"13976"
"13975"
"13974"
"13973"
"13972"
"13971"
"13970"
"13969"
"13968"
"13967"
"13966"
"13965"
"13964"
"13963"
"13962"
"13961"
"13960"
"13959"
"13958"
"13957"
"13956"
"13955"
"13954"
"13953"
"13952"
"13951"
"13950"
"13949"
"13948"
"13947"
"13946"
"13945"
"13944"
"13943"
"13942"
"13941"
"13940"
"13939"
"13938"
"13937"
"13936"
"13935"
"13934"
"13933"
"13932"
"13931"
"13930"
"13929"
"13928"
"13927"
"13926"
"13925"
"13924"
"13923"
"13922"
"13921"
"13920"
"13919"
"13918"
"13917"
"13916"
"13915"
"13914"
"13913"
"13912"
"13911"
"13910"
"13909"
"13908"
"13907"
"13906"
"13905"
"13904"
"13903"
"13902"
"13901"
"13900"
"13899"
"13898"
"13897"
"13896"
"13895"
"13894"
"13893"
"13892"
"13891"
"13890"
"13889"
"13888"
"13887"
"13886"
"13885"
"13884"
"13883"
"13882"
"13881"
"13880"
"13879"
"13878"
"13877"
"13876"
"13875"
"13874"
"13873"
"13872"
"13871"
"13870"
"13869"
"13868"
"13867"
"13866"
"13865"
"13864"
"13863"
"13862"
"13861"
"13860"
"13859"
"13858"
"13857"
"13856"
"13855"
"13854"
"13853"
"13852"
"13851"
"13850"
"13849"
"13848"
"13847"
"13846"
"13845"
"13844"
"13843"
"13842"
"13841"
"13840"
"13839"
"13838"
"13837"
"13836"
"13835"
"13834"
"13833"
"13832"
"13831"
"13830"
"13829"
"13828"
"13827"
"13826"
"13825"
"13824"
"13823"
"13822"
"13821"
"13820"
"13819"
"13818"
"13817"
"13816"
"13815"
"13814"
"13813"
"13812"
"13811"
"13810"
"13809"
"13808"
"13807"
"13806"
"13805"
"13804"
"13803"
"13802"
"13801"
"13800"
"13799"
"13798"
"13797"
"13796"
"13795"
"13794"
"13793"
"13792"
"13791"
"13790"
"13789"
"13788"
"13787"
"13786"
"13785"
"13784"
"13783"
"13782"
"13781"
"13780"
"13779"
"13778"
"13777"
"13776"
"13775"
"13774"
"13773"
"13772"
"13771"
"13770"
"13769"
"13768"
"13767"
"13766"
"13765"
"13764"
"13763"
"13762"
"13761"
"13760"
"13759"
"13758"
"13757"
"13756"
"13755"
"13754"
"13753"
"13752"
"13751"
"13750"
"13749"
"13748"
"13747"
"13746"
"13745"
"13744"
"13743"
"13742"
"13741"
"13740"
"13739"
"13738"
"13737"
"13736"
"13735"
"13734"
"13733"
"13732"
"13731"
"13730"
"13729"
"13728"
"13727"
"13726"
"13725"
"13724"
"13723"
"13722"
"13721"
"13720"
"13719"
"13718"
"13717"
"13716"
"13715"
"13714"
"13713"
"13712"
"13711"
"13710"
"13709"
"13708"
"13707"
"13706"
"13705"
"13704"
"13703"
"13702"
"13701"
"13700"
"13699"
"13698"
"13697"
"13696"
"13695"
"13694"
"13693"
"13692"
"13691"
"13690"
"13689"
"13688"
"13687"
"13686"
"13685"
"13684"
"13683"
"13682"
"13681"
"13680"
"13679"
"13678"
"13677"
"13676"
"13675"
"13674"
"13673"
"13672"
"13671"
"13670"
"13669"
"13668"
"13667"
"13666"
"13665"
"13664"
"13663"
"13662"
"13661"
"13660"
"13659"
"13658"
"13657"
"13656"
"13655"
"13654"
"13653"
"13652"
"13651"
"13650"
"13649"
"13648"
"13647"
"13646"
"13645"
"13644"
"13643"
"13642"
"13641"
"13640"
"13639"
"13638"
"13637"
"13636"
"13635"
"13634"
"13633"
"13632"
"13631"
"13630"
"13629"
"13628"
"13627"
"13626"
"13625"
"13624"
"13623"
"13622"
"13621"
"13620"
"13619"
"13618"
"13617"
"13616"
"13615"
"13614"
"13613"
"13612"
"13611"
"13610"
"13609"
"13608"
"13607"
"13606"
"13605"
"13604"
"13603"
"13602"
"13601"
"13600"
"13599"
"13598"
"13597"
"13596"
"13595"
"13594"
"13593"
"13592"
"13591"
"13590"
"13589"
"13588"
"13587"
"13586"
"13585"
"13584"
"13583"
"13582"
"13581"
"13580"
"13579"
"13578"
"13577"
"13576"
"13575"
"13574"
"13573"
"13572"
"13571"
"13570"
"13569"
"13568"
"13567"
"13566"
"13565"
"13564"
"13563"
"13562"
"13561"
"13560"
"13559"
"13558"
"13557"
"13556"
"13555"
"13554"
"13553"
"13552"
"13551"
"13550"
"13549"
"13548"
"13547"
"13546"
"13545"
"13544"
"13543"
"13542"
"13541"
"13540"
"13539"
"13538"
"13537"
"13536"
"13535"
"13534"
"13533"
"13532"
"13531"
"13530"
"13529"
"13528"
"13527"
"13526"
"13525"
"13524"
"13523"
"13522"
"13521"
"13520"
"13519"
"13518"
"13517"
"13516"
"13515"
"13514"
"13513"
"13512"
"13511"
"13510"
"13509"
"13508"
"13507"
"13506"
"13505"
"13504"
"13503"
"13502"
"13501"
"13500"
"13499"
"13498"
"13497"
"13496"
"13495"
"13494"
"13493"
"13492"
"13491"
"13490"
"13489"
"13488"
"13487"
"13486"
"13485"
"13484"
"13483"
"13482"
"13481"
"13480"
"13479"
"13478"
"13477"
"13476"
"13475"
"13474"
"13473"
"13472"
"13471"
"13470"
"13469"
"13468"
"13467"
"13466"
"13465"
"13464"
"13463"
"13462"
"13461"
"13460"
"13459"
"13458"
"13457"
"13456"
"13455"
"13454"
"13453"
"13452"
"13451"
"13450"
"13449"
"13448"
"13447"
"13446"
"13445"
"13444"
"13443"
"13442"
"13441"
"13440"
"13439"
"13438"
"13437"
"13436"
"13435"
"13434"
"13433"
"13432"
"13431"
"13430"
"13429"
"13428"
"13427"
"13426"
"13425"
"13424"
"13423"
"13422"
"13421"
"13420"
"13419"
"13418"
"13417"
"13416"
"13415"
"13414"
"13413"
"13412"
"13411"
"13410"
"13409"
"13408"
"13407"
"13406"
"13405"
"13404"
"13403"
"13402"
"13401"
"13400"
"13399"
"13398"
"13397"
"13396"
"13395"
"13394"
"13393"
"13392"
"13391"
"13390"
"13389"
"13388"
"13387"
"13386"
"13385"
"13384"
"13383"
"13382"
"13381"
"13380"
"13379"
"13378"
"13377"
"13376"
"13375"
"13374"
"13373"
"13372"
"13371"
"13370"
"13369"
"13368"
"13367"
"13366"
"13365"
"13364"
"13363"
"13362"
"13361"
"13360"
"13359"
"13358"
"13357"
"13356"
"13355"
"13354"
"13353"
"13352"
"13351"
"13350"
"13349"
"13348"
"13347"
"13346"
"13345"
"13344"
"13343"
"13342"
"13341"
"13340"
"13339"
"13338"
"13337"
"13336"
"13335"
"13334"
"13333"
"13332"
"13331"
"13330"
"13329"
"13328"
"13327"
"13326"
"13325"
"13324"
"13323"
"13322"
"13321"
"13320"
"13319"
"13318"
"13317"
"13316"
"13315"
"13314"
"13313"
"13312"
"13311"
"13310"
"13309"
"13308"
"13307"
"13306"
"13305"
"13304"
"13303"
"13302"
"13301"
"13300"
"13299"
"13298"
"13297"
"13296"
"13295"
"13294"
"13293"
"13292"
"13291"
"13290"
"13289"
"13288"
"13287"
"13286"
"13285"
"13284"
"13283"
"13282"
"13281"
"13280"
"13279"
"13278"
"13277"
"13276"
"13275"
"13274"
"13273"
"13272"
"13271"
"13270"
"13269"
"13268"
"13267"
"13266"
"13265"
"13264"
"13263"
"13262"
"13261"
"13260"
"13259"
"13258"
"13257"
"13256"
"13255"
"13254"
"13253"
"13252"
"13251"
"13250"
"13249"
"13248"
"13247"
"13246"
"13245"
"13244"
"13243"
"13242"
"13241"
"13240"
"13239"
"13238"
"13237"
"13236"
"13235"
"13234"
"13233"
"13232"
"13231"
"13230"
"13229"
"13228"
"13227"
"13226"
"13225"
"13224"
"13223"
"13222"
"13221"
"13220"
"13219"
"13218"
"13217"
"13216"
"13215"
"13214"
"13213"
"13212"
"13211"
"13210"
"13209"
"13208"
"13207"
"13206"
"13205"
"13204"
"13203"
"13202"
"13201"
"13200"
"13199"
"13198"
"13197"
"13196"
"13195"
"13194"
"13193"
"13192"
"13191"
"13190"
"13189"
"13188"
"13187"
"13186"
"13185"
"13184"
"13183"
"13182"
"13181"
"13180"
"13179"
"13178"
"13177"
"13176"
"13175"
"13174"
"13173"
"13172"
"13171"
"13170"
"13169"
"13168"
"13167"
"13166"
"13165"
"13164"
"13163"
"13162"
"13161"
"13160"
"13159"
"13158"
"13157"
"13156"
"13155"
"13154"
"13153"
"13152"
"13151"
"13150"
"13149"
"13148"
"13147"
"13146"
"13145"
"13144"
"13143"
"13142"
"13141"
"13140"
"13139"
"13138"
"13137"
"13136"
"13135"
"13134"
"13133"
"13132"
"13131"
"13130"
"13129"
"13128"
"13127"
"13126"
"13125"
"13124"
"13123"
"13122"
"13121"
"13120"
"13119"
"13118"
"13117"
"13116"
"13115"
"13114"
"13113"
"13112"
"13111"
"13110"
"13109"
"13108"
"13107"
"13106"
"13105"
"13104"
"13103"
"13102"
"13101"
"13100"
"13099"
"13098"
"13097"
"13096"
"13095"
"13094"
"13093"
"13092"
"13091"
"13090"
"13089"
"13088"
"13087"
"13086"
"13085"
"13084"
"13083"
"13082"
"13081"
"13080"
"13079"
"13078"
"13077"
"13076"
"13075"
"13074"
"13073"
"13072"
"13071"
"13070"
"13069"
"13068"
"13067"
"13066"
"13065"
"13064"
"13063"
"13062"
"13061"
"13060"
"13059"
"13058"
"13057"
"13056"
"13055"
"13054"
"13053"
"13052"
"13051"
"13050"
"13049"
"13048"
"13047"
"13046"
"13045"
"13044"
"13043"
"13042"
"13041"
"13040"
"13039"
"13038"
"13037"
"13036"
"13035"
"13034"
"13033"
"13032"
"13031"
"13030"
"13029"
"13028"
"13027"
"13026"
"13025"
"13024"
"13023"
"13022"
"13021"
"13020"
"13019"
"13018"
"13017"
"13016"
"13015"
"13014"
"13013"
"13012"
"13011"
"13010"
"13009"
"13008"
"13007"
"13006"
"13005"
"13004"
"13003"
"13002"
"13001"
"13000"
"12999"
"12998"
"12997"
"12996"
"12995"
"12994"
"12993"
"12992"
"12991"
"12990"
"12989"
"12988"
"12987"
"12986"
"12985"
"12984"
"12983"
"12982"
"12981"
"12980"
"12979"
"12978"
"12977"
"12976"
"12975"
"12974"
"12973"
"12972"
"12971"
"12970"
"12969"
"12968"
"12967"
"12966"
"12965"
"12964"
"12963"
"12962"
"12961"
"12960"
"12959"
"12958"
"12957"
"12956"
"12955"
"12954"
"12953"
"12952"
"12951"
"12950"
"12949"
"12948"
"12947"
"12946"
"12945"
"12944"
"12943"
"12942"
"12941"
"12940"
"12939"
"12938"
"12937"
"12936"
"12935"
"12934"
"12933"
"12932"
"12931"
"12930"
"12929"
"12928"
"12927"
"12926"
"12925"
"12924"
"12923"
"12922"
"12921"
"12920"
"12919"
"12918"
"12917"
"12916"
"12915"
"12914"
"12913"
"12912"
"12911"
"12910"
"12909"
"12908"
"12907"
"12906"
"12905"
"12904"
"12903"
"12902"
"12901"
"12900"
"12899"
"12898"
"12897"
"12896"
"12895"
"12894"
"12893"
"12892"
"12891"
"12890"
"12889"
"12888"
"12887"
"12886"
"12885"
"12884"
"12883"
"12882"
"12881"
"12880"
"12879"
"12878"
"12877"
"12876"
"12875"
"12874"
"12873"
"12872"
"12871"
"12870"
"12869"
"12868"
"12867"
"12866"
"12865"
"12864"
"12863"
"12862"
"12861"
"12860"
"12859"
"12858"
"12857"
"12856"
"12855"
"12854"
"12853"
"12852"
"12851"
"12850"
"12849"
"12848"
"12847"
"12846"
"12845"
"12844"
"12843"
"12842"
"12841"
"12840"
"12839"
"12838"
"12837"
"12836"
"12835"
"12834"
"12833"
"12832"
"12831"
"12830"
"12829"
"12828"
"12827"
"12826"
"12825"
"12824"
"12823"
"12822"
"12821"
"12820"
"12819"
