# Supplementary material for: APP Is a Context-Sensitive Regulator of the Hippocampal Presynaptic Active Zone
Source: PLOS journal article supplement (doi:10.1371/journal.pcbi.1004832), 2016-04-19
Supplement: S6 (10.1371/journal.pcbi.1004832.s006) [file journal.pcbi.1004832.s006.cys › CytoscapeSession-2016_01_22-10_07/tables/12194-Localization/HIDDEN-org.cytoscape.model.CyNode-12194+hidden+node.cytable]

"CyCSV-Version","1"
"SUID"
"java.lang.Long"
""
"12194 hidden node",""
"12818"
"12817"
"12816"
"12815"
"12814"
"12813"
"12812"
"12811"
"12810"
"12809"
"12808"
"12807"
"12806"
"12805"
"12804"
"12803"
"12802"
"12801"
"12800"
"12799"
"12798"
"12797"
"12796"
"12795"
"12794"
"12793"
"12792"
"12791"
"12790"
"12789"
"12788"
"12787"
"12786"
"12785"
"12784"
"12783"
"12782"
"12781"
"12780"
"12779"
"12778"
"12777"
"12776"
"12775"
"12774"
"12773"
"12772"
"12771"
"12770"
"12769"
"12768"
"12767"
"12766"
"12765"
"12764"
"12763"
"12762"
"12761"
"12760"
"12759"
"12758"
"12757"
"12756"
"12755"
"12754"
"12753"
"12752"
"12751"
"12750"
"12749"
"12748"
"12747"
"12746"
"12745"
"12744"
"12743"
"12742"
"12741"
"12740"
"12739"
"12738"
"12737"
"12736"
"12735"
"12734"
"12733"
"12732"
"12731"
"12730"
"12729"
"12728"
"12727"
"12726"
"12725"
"12724"
"12723"
"12722"
"12721"
"12720"
"12719"
"12718"
"12717"
"12716"
"12715"
"12714"
"12713"
"12712"
"12711"
"12710"
"12709"
"12708"
"12707"
"12706"
"12705"
"12704"
"12703"
"12702"
"12701"
"12700"
"12699"
"12698"
"12697"
"12696"
"12695"
"12694"
"12693"
"12692"
"12691"
"12690"
"12689"
"12688"
"12687"
"12686"
"12685"
"12684"
"12683"
"12682"
"12681"
"12680"
"12679"
"12678"
"12677"
"12676"
"12675"
"12674"
"12673"
"12672"
"12671"
"12670"
"12669"
"12668"
"12667"
"12666"
"12665"
"12664"
"12663"
"12662"
"12661"
"12660"
"12659"
"12658"
"12657"
"12656"
"12655"
"12654"
"12653"
"12652"
"12651"
"12650"
"12649"
"12648"
"12647"
"12646"
"12645"
"12644"
"12643"
"12642"
"12641"
"12640"
"12639"
"12638"
"12637"
"12636"
"12635"
"12634"
"12633"
"12632"
"12631"
"12630"
"12629"
"12628"
"12627"
"12626"
"12625"
"12624"
"12623"
"12622"
"12621"
"12620"
"12619"
"12618"
"12617"
"12616"
"12615"
"12614"
"12613"
"12612"
"12611"
"12610"
"12609"
"12608"
"12607"
"12606"
"12605"
"12604"
"12603"
"12602"
"12601"
"12600"
"12599"
"12598"
"12597"
"12596"
"12595"
"12594"
"12593"
"12592"
"12591"
"12590"
"12589"
"12588"
"12587"
"12586"
"12585"
"12584"
"12583"
"12582"
"12581"
"12580"
"12579"
"12578"
"12577"
"12576"
"12575"
"12574"
"12573"
"12572"
"12571"
"12570"
"12569"
"12568"
"12567"
"12566"
"12565"
"12564"
"12563"
"12562"
"12561"
"12560"
"12559"
"12558"
"12557"
"12556"
"12555"
"12554"
"12553"
"12552"
"12551"
"12550"
"12549"
"12548"
"12547"
"12546"
"12545"
"12544"
"12543"
"12542"
"12541"
"12540"
"12539"
"12538"
"12537"
"12536"
"12535"
"12534"
"12533"
"12532"
"12531"
"12530"
"12529"
"12528"
"12527"
"12526"
"12525"
"12524"
"12523"
"12522"
"12521"
"12520"
"12519"
"12518"
"12517"
"12516"
"12515"
"12514"
"12513"
"12512"
"12511"
"12510"
"12509"
"12508"
"12507"
"12506"
"12505"
"12504"
"12503"
"12502"
"12501"
"12500"
"12499"
"12498"
"12497"
"12496"
"12495"
"12494"
"12493"
"12492"
"12491"
"12490"
"12489"
"12488"
"12487"
"12486"
"12485"
"12484"
"12483"
"12482"
"12481"
"12480"
"12479"
"12478"
"12477"
"12476"
"12475"
"12474"
"12473"
"12472"
"12471"
"12470"
"12469"
"12468"
"12467"
"12466"
"12465"
"12464"
"12463"
"12462"
"12461"
"12460"
"12459"
"12458"
"12457"
"12456"
"12455"
"12454"
"12453"
"12452"
"12451"
"12450"
"12449"
"12448"
"12447"
"12446"
"12445"
"12444"
"12443"
"12442"
"12441"
"12440"
"12439"
"12438"
"12437"
"12436"
"12435"
"12434"
"12433"
"12432"
"12431"
"12430"
"12429"
"12428"
"12427"
"12426"
"12425"
"12424"
"12423"
"12422"
"12421"
"12420"
"12419"
"12418"
"12417"
"12416"
"12415"
"12414"
"12413"
"12412"
"12411"
"12410"
"12409"
"12408"
"12407"
"12406"
"12405"
"12404"
"12403"
"12402"
"12401"
"12400"
"12399"
"12398"
"12397"
"12396"
"12395"
"12394"
"12393"
"12392"
"12391"
"12390"
"12389"
"12388"
"12387"
"12386"
"12385"
"12384"
"12383"
"12382"
"12381"
"12380"
"12379"
"12378"
"12377"
"12376"
"12375"
"12374"
"12373"
"12372"
"12371"
"12370"
"12369"
"12368"
"12367"
"12366"
"12365"
"12364"
"12363"
"12362"
"12361"
"12360"
"12359"
"12358"
"12357"
"12356"
"12355"
"12354"
"12353"
"12352"
"12351"
"12350"
"12349"
"12348"
"12347"
"12346"
"12345"
"12344"
"12343"
"12342"
"12341"
"12340"
"12339"
"12338"
"12337"
"12336"
"12335"
"12334"
"12333"
"12332"
"12331"
"12330"
"12329"
"12328"
"12327"
"12326"
"12325"
"12324"
"12323"
"12322"
"12321"
"12320"
"12319"
"12318"
"12317"
"12316"
"12315"
"12314"
"12313"
"12312"
"12311"
"12310"
"12309"
"12308"
"12307"
"12306"
"12305"
"12304"
"12303"
"12302"
"12301"
"12300"
"12299"
"12298"
"12297"
"12296"
"12295"
"12294"
"12293"
"12292"
"12291"
"12290"
"12289"
"12288"
"12287"
"12286"
"12285"
"12284"
"12283"
"12282"
"12281"
"12280"
"12279"
"12278"
"12277"
"12276"
"12275"
"12274"
"12273"
"12272"
"12271"
"12270"
"12269"
"12268"
"12267"
"12266"
"12265"
"12264"
"12263"
"12262"
"12261"
"12260"
"12259"
"12258"
"12257"
"12256"
"12255"
"12254"
"12253"
"12252"
"12251"
"12250"
"12249"
"12248"
"12247"
"12246"
"12245"
"12244"
"12243"
"12242"
"12241"
"12240"
"12239"
"12238"
"12237"
"12236"
"12235"
"12234"
"12233"
"12232"
"12231"
"12230"
"12229"
"12228"
"12227"
"12226"
"12225"
"12224"
"12223"
"12222"
"12221"
"12220"
"12219"
"12218"
"12217"
"12216"
"12215"
"12214"
"12213"
"12212"
"12211"
"12210"
"12209"
"12208"
"12207"
"12206"
"12205"
"12204"
