# Supplementary material for: APP Is a Context-Sensitive Regulator of the Hippocampal Presynaptic Active Zone
Source: PLOS journal article supplement (doi:10.1371/journal.pcbi.1004832), 2016-04-19
Supplement: S6 (10.1371/journal.pcbi.1004832.s006) [file journal.pcbi.1004832.s006.cys › CytoscapeSession-2016_01_22-10_07/tables/12194-Localization/LOCAL_ATTRS-org.cytoscape.model.CyEdge-Localization+default+edge.cytable]

CyCSV-Version	1
SUID	BEND_MAP_ID	interaction	name	selected
java.lang.Long	java.lang.Long	java.lang.String	java.lang.String	java.lang.Boolean
	mutable
Localization default edge
12819	12151	pp	Q01097 (pp) Q80Z38	false
12820	12150	pp	Q01097 (pp) P05132	false
12821	12149	pp	Q01097 (pp) P15105	false
12822	12148	pp	Q01097 (pp) O35526	false
12823	12147	pp	Q01097 (pp) P51881	false
12824	12146	pp	Q01097 (pp) P68510	false
12825	12145	pp	Q01097 (pp) Q60676	false
12826	12144	pp	Q01097 (pp) P12367	false
12827	12143	pp	Q01097 (pp) P63085	false
12828	12142	pp	Q01097 (pp) P47754	false
12829	12141	pp	Q01097 (pp) Q03265	false
12830	12140	pp	Q01097 (pp) P62835	false
12831	12139	pp	Q01097 (pp) Q6PHZ2	false
12832	12138	pp	Q01097 (pp) Q9D6M3	false
12833	12137	pp	Q01097 (pp) P63101	false
12834	12136	pp	Q01097 (pp) P17426	false
12835	12135	pp	Q01097 (pp) P68033	false
12836	12134	pp	Q01097 (pp) P68369	false
12837	12133	pp	Q01097 (pp) P47757	false
12838	12132	pp	Q01097 (pp) P05063	false
12839	12131	pp	Q01097 (pp) P20357	false
12840	12130	pp	Q01097 (pp) P31938	false
12841	12129	pp	Q01097 (pp) P16054	false
12842	12128	pp	Q01097 (pp) P51863	false
12843	12127	pp	Q01097 (pp) P16858	false
12844	12126	pp	Q01097 (pp) P06151	false
12845	12125	pp	Q01097 (pp) P60879	false
12846	12124	pp	Q01097 (pp) O88952	false
12847	12123	pp	Q01097 (pp) P05480	false
12848	12122	pp	Q01097 (pp) P50516	false
12849	12121	pp	Q01097 (pp) P63318	false
12850	12120	pp	Q01097 (pp) P97772	false
12851	12119	pp	Q01097 (pp) P68404	false
12852	12118	pp	Q01097 (pp) O55100	false
12853	12117	pp	Q01097 (pp) Q91VR2	false
12854	12116	pp	Q01097 (pp) P35279	false
12855	12115	pp	Q01097 (pp) P63321	false
12856	12114	pp	Q01097 (pp) P61982	false
12857	12113	pp	Q01097 (pp) P60710	false
12858	12112	pp	Q01097 (pp) P08553	false
12859	12111	pp	Q01097 (pp) P62204	false
12860	12110	pp	Q01097 (pp) Q61411	false
12861	12109	pp	Q01097 (pp) P62259	false
12862	12108	pp	Q01097 (pp) P48962	false
12863	12107	pp	Q01097 (pp) O08599	false
12864	12106	pp	Q01097 (pp) Q923T9	false
12865	12105	pp	Q01097 (pp) Q9JM76	false
12866	12104	pp	Q01097 (pp) P46096	false
12867	12103	pp	Q01097 (pp) P63328	false
12868	12102	pp	Q01097 (pp) P63001	false
12869	12101	pp	Q01097 (pp) P59999	false
12870	12100	pp	Q01097 (pp) F6SEU4	false
12871	12099	pp	Q01097 (pp) P63011	false
12872	12098	pp	Q01097 (pp) Q8BH59	false
12873	12097	pp	Q01097 (pp) P17751	false
12874	12096	pp	Q01097 (pp) O88737	false
12875	12095	pp	Q01097 (pp) P06837	false
12876	12094	pp	Q01097 (pp) P43006	false
12877	12093	pp	Q01097 (pp) Q9CVB6	false
12878	12092	pp	Q01097 (pp) P08551	false
12879	12091	pp	Q01097 (pp) P11627	false
12880	12090	pp	Q01097 (pp) P13020	false
12881	12089	pp	Q01097 (pp) P05202	false
12882	12088	pp	Q01097 (pp) P62874	false
12883	12087	pp	Q01097 (pp) P35438	false
12884	12086	pp	Q01097 (pp) P30999	false
12885	12085	pp	Q01097 (pp) D3YVF0	false
12886	12084	pp	Q01097 (pp) Q9QXS6	false
12887	12083	pp	Q01097 (pp) P39053	false
12888	12082	pp	Q01097 (pp) P63330	false
12889	12081	pp	Q01097 (pp) P46660	false
12890	12080	pp	Q01097 (pp) P53994	false
12891	12079	pp	Q01097 (pp) P35436	false
12892	12078	pp	Q01097 (pp) O35129	false
12893	12077	pp	Q01097 (pp) P68181	false
12894	12076	pp	Q01097 (pp) Q61879	false
12895	12075	pp	Q01097 (pp) P31324	false
12896	12074	pp	Q01097 (pp) P57780	false
12897	12073	pp	Q01097 (pp) P15116	false
12898	12072	pp	Q01097 (pp) A2CG49	false
12899	12071	pp	Q01097 (pp) P12382	false
12900	12070	pp	Q80Z38 (pp) Q8BYM5	false
12901	12069	pp	Q80Z38 (pp) P35438	false
12902	12068	pp	Q9CQZ5 (pp) Q9D6J6	false
12903	12067	pp	Q9CQZ5 (pp) P48771	false
12904	12066	pp	Q9CQZ5 (pp) Q91VR2	false
12905	12065	pp	Q9CQZ5 (pp) Q91VD9	false
12906	12064	pp	Q9CQZ5 (pp) Q9CPP6	false
12907	12063	pp	Q9CQZ5 (pp) Q9CQZ6	false
12908	12062	pp	Q9CQZ5 (pp) P19536	false
12909	12061	pp	Q9CQZ5 (pp) O09111	false
12910	12060	pp	Q9CQZ5 (pp) P97450	false
12911	12059	pp	Q9CQZ5 (pp) Q91YT0	false
12912	12058	pp	Q9CQZ5 (pp) Q9CQ69	false
12913	12057	pp	Q9CQZ5 (pp) Q99LC5	false
12914	12056	pp	Q9CQZ5 (pp) P99029	false
12915	12055	pp	Q9CQZ5 (pp) Q9CPQ8	false
12916	12054	pp	Q9CQZ5 (pp) Q9CQC7	false
12917	12053	pp	Q9CQZ5 (pp) Q3UIU2	false
12918	12052	pp	Q9CQZ5 (pp) Q9CQQ7	false
12919	12051	pp	Q9CQZ5 (pp) Q62425	false
12920	12050	pp	Q9CQZ5 (pp) Q9CR68	false
12921	12049	pp	Q9CQZ5 (pp) Q9CZ13	false
12922	12048	pp	Q9CQZ5 (pp) Q9DC69	false
12923	12047	pp	Q9CQZ5 (pp) Q9D0S9	false
12924	12046	pp	Q9CQZ5 (pp) Q99LC3	false
12925	12045	pp	Q9CQZ5 (pp) Q9D6J5	false
12926	12044	pp	Q9CQZ5 (pp) Q9DCS9	false
12927	12043	pp	Q9CQZ5 (pp) Q06185	false
12928	12042	pp	Q9CQZ5 (pp) Q9DCX2	false
12929	12041	pp	Q9CQZ5 (pp) Q9DB20	false
12930	12040	pp	Q9CQZ5 (pp) Q9CQ54	false
12931	12039	pp	Q9CQZ5 (pp) Q9D3D9	false
12932	12038	pp	Q9CQZ5 (pp) Q9ERS2	false
12933	12037	pp	Q9CQZ5 (pp) Q9WUM5	false
12934	12036	pp	Q9CQZ5 (pp) Q9DCJ5	false
12935	12035	pp	Q9CQZ5 (pp) Q8K3J1	false
12936	12034	pp	Q9CQZ5 (pp) Q9D0M3	false
12937	12033	pp	Q9CQZ5 (pp) Q99LX0	false
12938	12032	pp	Q9CQZ5 (pp) Q9CQH3	false
12939	12031	pp	Q9CQZ5 (pp) Q9DB77	false
12940	12030	pp	Q9CQZ5 (pp) Q9Z1P6	false
12941	12029	pp	Q9D6J6 (pp) Q01097	false
12942	12028	pp	O08749 (pp) Q9D051	false
12943	12027	pp	O08749 (pp) P97807	false
12944	12026	pp	O08749 (pp) Q91YT0	false
12945	12025	pp	O08749 (pp) Q03265	false
12946	12024	pp	O08749 (pp) Q99LC5	false
12947	12023	pp	O08749 (pp) Q6PB66	false
12948	12022	pp	O08749 (pp) Q60931	false
12949	12021	pp	O08749 (pp) Q99KI0	false
12950	12020	pp	O08749 (pp) Q9Z2I9	false
12951	12019	pp	O08749 (pp) Q9WUM5	false
12952	12018	pp	O08749 (pp) Q60597	false
12953	12017	pp	O08749 (pp) Q9D6J6	false
12954	12016	pp	O08749 (pp) Q8BKZ9	false
12955	12015	pp	O08749 (pp) Q8BMF4	false
12956	12014	pp	O08749 (pp) P63038	false
12957	12013	pp	O08749 (pp) P99029	false
12958	12012	pp	O08749 (pp) O88441	false
12959	12011	pp	O08749 (pp) Q91VD9	false
12960	12010	pp	O08749 (pp) Q9CQH3	false
12961	12009	pp	O08749 (pp) P09671	false
12962	12008	pp	O08749 (pp) Q91VR2	false
12963	12007	pp	O08749 (pp) Q8K2B3	false
12964	12006	pp	O08749 (pp) Q9CZU6	false
12965	12005	pp	O08749 (pp) Q9CQA3	false
12966	12004	pp	O08749 (pp) P52480	false
12967	12003	pp	O08749 (pp) Q9DB77	false
12968	12002	pp	O08749 (pp) P08249	false
12969	12001	pp	O08749 (pp) Q9D2G2	false
12970	12000	pp	O08749 (pp) Q9D6R2	false
12971	11999	pp	O08749 (pp) P35486	false
12972	11998	pp	O08749 (pp) Q91ZJ5	false
12973	11997	pp	O08749 (pp) Q9DC69	false
12974	11996	pp	O08749 (pp) P56480	false
12975	11995	pp	Q9D051 (pp) Q03265	false
12976	11994	pp	Q9D051 (pp) Q91VD9	false
12977	11993	pp	Q9D051 (pp) Q8BMF4	false
12978	11992	pp	Q9D051 (pp) Q9DB77	false
12979	11991	pp	Q9D051 (pp) P63101	false
12980	11990	pp	Q9D051 (pp) Q9CQQ7	false
12981	11989	pp	Q9D051 (pp) P52480	false
12982	11988	pp	Q9D051 (pp) Q9D6R2	false
12983	11987	pp	Q9D051 (pp) P40142	false
12984	11986	pp	Q9D051 (pp) P16054	false
12985	11985	pp	Q9D051 (pp) P06151	false
12986	11984	pp	Q9D051 (pp) P97450	false
12987	11983	pp	Q9D051 (pp) Q8BMF3	false
12988	11982	pp	Q9D051 (pp) P97807	false
12989	11981	pp	Q9D051 (pp) Q9CQH3	false
12990	11980	pp	Q9D051 (pp) Q9D0M3	false
12991	11979	pp	Q9D051 (pp) Q9D2G2	false
12992	11978	pp	Q9D051 (pp) Q9CR68	false
12993	11977	pp	Q9D051 (pp) Q05920	false
12994	11976	pp	Q9D051 (pp) Q9DCJ5	false
12995	11975	pp	Q9D051 (pp) Q99LC5	false
12996	11974	pp	Q9D051 (pp) P35486	false
12997	11973	pp	Q9D051 (pp) Q93092	false
12998	11972	pp	Q9D051 (pp) P06745	false
12999	11971	pp	Q9D3D9 (pp) O09111	false
13000	11970	pp	Q9D3D9 (pp) Q9ERS2	false
13001	11969	pp	Q9D3D9 (pp) Q9CQH3	false
13002	11968	pp	Q9D3D9 (pp) Q91VR2	false
13003	11967	pp	Q9D3D9 (pp) Q99LY9	false
13004	11966	pp	Q9D3D9 (pp) Q9D6J6	false
13005	11965	pp	O09111 (pp) Q9CQH3	false
13006	11964	pp	O09111 (pp) Q9D6J6	false
13007	11963	pp	Q03265 (pp) P68510	false
13008	11962	pp	Q03265 (pp) Q91VM9	false
13009	11961	pp	Q03265 (pp) Q9DC69	false
13010	11960	pp	Q03265 (pp) Q9CR68	false
13011	11959	pp	Q03265 (pp) Q9DCX2	false
13012	11958	pp	Q03265 (pp) Q91VD9	false
13013	11957	pp	Q03265 (pp) Q9CZ13	false
13014	11956	pp	Q03265 (pp) P97807	false
13015	11955	pp	Q03265 (pp) P16054	false
13016	11954	pp	Q03265 (pp) P09411	false
13017	11953	pp	Q03265 (pp) Q8K3J1	false
13018	11952	pp	Q03265 (pp) Q99LC5	false
13019	11951	pp	Q03265 (pp) Q9R0Y5	false
13020	11950	pp	Q03265 (pp) Q91VR2	false
13021	11949	pp	Q03265 (pp) Q91YT0	false
13022	11948	pp	Q03265 (pp) Q9WUM5	false
13023	11947	pp	Q03265 (pp) Q06185	false
13024	11946	pp	Q03265 (pp) Q9DB77	false
13025	11945	pp	Q03265 (pp) P63038	false
13026	11944	pp	Q03265 (pp) Q60931	false
13027	11943	pp	Q03265 (pp) Q8VEM8	false
13028	11942	pp	Q03265 (pp) Q9D2G2	false
13029	11941	pp	Q03265 (pp) Q9D3D9	false
13030	11940	pp	Q03265 (pp) P48962	false
13031	11939	pp	Q03265 (pp) P19536	false
13032	11938	pp	Q03265 (pp) P03930	false
13033	11937	pp	Q03265 (pp) Q9CQQ7	false
13034	11936	pp	Q03265 (pp) O35143	false
13035	11935	pp	Q03265 (pp) Q9D6J6	false
13036	11934	pp	Q03265 (pp) Q9CQH3	false
13037	11933	pp	Q03265 (pp) P43024	false
13038	11932	pp	P68510 (pp) P05202	false
13039	11931	pp	P68510 (pp) P17751	false
13040	11930	pp	P68510 (pp) Q99PT1	false
13041	11929	pp	P68510 (pp) P68368	false
13042	11928	pp	P68510 (pp) Q9D8B3	false
13043	11927	pp	P68510 (pp) Q9CQ92	false
13044	11926	pp	P68510 (pp) Q91VZ6	false
13045	11925	pp	P68510 (pp) Q8VBV7	false
13046	11924	pp	P68510 (pp) P08249	false
13047	11923	pp	P68510 (pp) Q61553	false
13048	11922	pp	P68510 (pp) P67871	false
13049	11921	pp	P68510 (pp) O55042	false
13050	11920	pp	P68510 (pp) P10637	false
13051	11919	pp	P68510 (pp) P61164	false
13052	11918	pp	P68510 (pp) Q9R0Q6	false
13053	11917	pp	P68510 (pp) P63101	false
13054	11916	pp	P68510 (pp) P48036	false
13055	11915	pp	P68510 (pp) P50518	false
13056	11914	pp	P68510 (pp) P12787	false
13057	11913	pp	P68510 (pp) Q9CWS0	false
13058	11912	pp	P68510 (pp) Q68FD5	false
13059	11911	pp	P68510 (pp) P54071	false
13060	11910	pp	P68510 (pp) Q9ERS2	false
13061	11909	pp	P68510 (pp) P42208	false
13062	11908	pp	P68510 (pp) P46460	false
13063	11907	pp	P68510 (pp) Q60930	false
13064	11906	pp	P68510 (pp) Q9DCW4	false
13065	11905	pp	P68510 (pp) Q9WV55	false
13066	11904	pp	P68510 (pp) P11499	false
13067	11903	pp	P68510 (pp) Q9D051	false
13068	11902	pp	P68510 (pp) P56480	false
13069	11901	pp	P68510 (pp) Q9CQW1	false
13070	11900	pp	P68510 (pp) Q9DCJ5	false
13071	11899	pp	P68510 (pp) P62259	false
13072	11898	pp	P12382 (pp) P35438	false
13073	11897	pp	P12382 (pp) P17710	false
13074	11896	pp	P12382 (pp) P05063	false
13075	11895	pp	P12382 (pp) P05064	false
13076	11894	pp	P12382 (pp) Q93092	false
13077	11893	pp	P12382 (pp) P63101	false
13078	11892	pp	P12382 (pp) P06745	false
13079	11891	pp	P12382 (pp) P52480	false
13080	11890	pp	P12382 (pp) P47857	false
13081	11889	pp	P12382 (pp) P17751	false
13082	11888	pp	P35438 (pp) P28652	false
13083	11887	pp	P35438 (pp) Q6PIC6	false
13084	11886	pp	P35438 (pp) Q60631	false
13085	11885	pp	P35438 (pp) P68033	false
13086	11884	pp	P35438 (pp) P06837	false
13087	11883	pp	P35438 (pp) P68368	false
13088	11882	pp	P35438 (pp) P62259	false
13089	11881	pp	P35438 (pp) O55100	false
13090	11880	pp	P35438 (pp) P57780	false
13091	11879	pp	P35438 (pp) Q8BMF4	false
13092	11878	pp	P35438 (pp) Q6URW6	false
13093	11877	pp	P35438 (pp) O88737	false
13094	11876	pp	P35438 (pp) A2CG49	false
13095	11875	pp	P35438 (pp) P63017	false
13096	11874	pp	P35438 (pp) P12367	false
13097	11873	pp	P35438 (pp) O35526	false
13098	11872	pp	P35438 (pp) F6SEU4	false
13099	11871	pp	P35438 (pp) P11627	false
13100	11870	pp	P05202 (pp) P54071	false
13101	11869	pp	P05202 (pp) Q9D6R2	false
13102	11868	pp	P05202 (pp) Q60597	false
13103	11867	pp	P05202 (pp) Q05920	false
13104	11866	pp	P05202 (pp) Q8BH04	false
13105	11865	pp	P05202 (pp) P06151	false
13106	11864	pp	P05202 (pp) P70404	false
13107	11863	pp	Q9QUI0 (pp) Q06335	false
13108	11862	pp	Q9QUI0 (pp) Q99PT1	false
13109	11861	pp	Q9QUI0 (pp) P30999	false
13110	11860	pp	Q9QUI0 (pp) P63001	false
13111	11859	pp	Q9QUI0 (pp) O88643	false
13112	11858	pp	Q06335 (pp) Q9QXJ1	false
13113	11857	pp	Q06335 (pp) P63330	false
13114	11856	pp	Q06335 (pp) P04925	false
13115	11855	pp	Q06335 (pp) P12023	false
13116	11854	pp	Q06335 (pp) P63001	false
13117	11853	pp	Q06335 (pp) Q03157	false
13118	11852	pp	P23819 (pp) P35436	false
13119	11851	pp	P23819 (pp) P68369	false
13120	11850	pp	P23819 (pp) P99024	false
13121	11849	pp	P23819 (pp) O08599	false
13122	11848	pp	P23819 (pp) P38647	false
13123	11847	pp	P23819 (pp) P16330	false
13124	11846	pp	P35436 (pp) P35438	false
13125	11845	pp	Q9CZU6 (pp) Q9DCD0	false
13126	11844	pp	Q9CZU6 (pp) Q91VD9	false
13127	11843	pp	Q9CZU6 (pp) P05202	false
13128	11842	pp	Q9CZU6 (pp) Q8BKZ9	false
13129	11841	pp	Q9CZU6 (pp) Q8BMF3	false
13130	11840	pp	Q9CZU6 (pp) P26443	false
13131	11839	pp	Q9CZU6 (pp) P08249	false
13132	11838	pp	Q9CZU6 (pp) Q91VR2	false
13133	11837	pp	Q9CZU6 (pp) P97807	false
13134	11836	pp	Q9CZU6 (pp) P06151	false
13135	11835	pp	Q9CZU6 (pp) Q8K2B3	false
13136	11834	pp	Q9CZU6 (pp) Q99KI0	false
13137	11833	pp	Q9CZU6 (pp) Q8BWT1	false
13138	11832	pp	Q9CZU6 (pp) Q91WD5	false
13139	11831	pp	Q9CZU6 (pp) Q91YT0	false
13140	11830	pp	Q9CZU6 (pp) Q03265	false
13141	11829	pp	Q9CZU6 (pp) P52480	false
13142	11828	pp	Q9CZU6 (pp) P09671	false
13143	11827	pp	Q9CZU6 (pp) Q9D0M3	false
13144	11826	pp	Q9CZU6 (pp) Q9CQA3	false
13145	11825	pp	Q9CZU6 (pp) Q99JY0	false
13146	11824	pp	Q9CZU6 (pp) Q8BMF4	false
13147	11823	pp	Q9CZU6 (pp) Q8BH04	false
13148	11822	pp	Q9CZU6 (pp) P35486	false
13149	11821	pp	Q9CZU6 (pp) Q8BGH2	false
13150	11820	pp	Q9CZU6 (pp) Q60597	false
13151	11819	pp	Q9CZU6 (pp) Q9DB20	false
13152	11818	pp	Q9CZU6 (pp) Q9D6R2	false
13153	11817	pp	Q9CZU6 (pp) P70404	false
13154	11816	pp	Q9CZU6 (pp) Q9WUM5	false
13155	11815	pp	Q9CZU6 (pp) Q8QZT1	false
13156	11814	pp	Q9CZU6 (pp) P56480	false
13157	11813	pp	Q9CZU6 (pp) Q9D2G2	false
13158	11812	pp	Q9CZU6 (pp) Q05920	false
13159	11811	pp	Q9CZU6 (pp) Q9D6J6	false
13160	11810	pp	Q9CZU6 (pp) Q9CZ13	false
13161	11809	pp	Q9CZU6 (pp) Q9CR68	false
13162	11808	pp	Q9CZU6 (pp) P19096	false
13163	11807	pp	Q9DCD0 (pp) Q9D0F9	false
13164	11806	pp	Q9DCD0 (pp) Q8BMS1	false
13165	11805	pp	Q9DCD0 (pp) Q91ZJ5	false
13166	11804	pp	Q9DCD0 (pp) P06151	false
13167	11803	pp	Q9DCD0 (pp) Q8CAQ8	false
13168	11802	pp	P51863 (pp) Q9Z1G3	false
13169	11801	pp	P51863 (pp) P63082	false
13170	11800	pp	P51863 (pp) Q8BVE3	false
13171	11799	pp	P51863 (pp) P50516	false
13172	11798	pp	P51863 (pp) P57746	false
13173	11797	pp	P51863 (pp) Q9Z1G4	false
13174	11796	pp	P51863 (pp) Q9EPJ9	false
13175	11795	pp	P51863 (pp) P50518	false
13176	11794	pp	P51863 (pp) Q9WTT4	false
13177	11793	pp	Q9Z1G3 (pp) P62331	false
13178	11792	pp	Q9Z1G3 (pp) Q9WTT4	false
13179	11791	pp	Q9Z1G3 (pp) Q9Z1G4	false
13180	11790	pp	Q9Z1G3 (pp) P50516	false
13181	11789	pp	Q9Z1G3 (pp) Q91VM9	false
13182	11788	pp	Q9Z1G3 (pp) Q8BVE3	false
13183	11787	pp	Q9Z1G3 (pp) P63082	false
13184	11786	pp	Q9Z1G3 (pp) P23506	false
13185	11785	pp	P62259 (pp) P47757	false
13186	11784	pp	P62259 (pp) P46660	false
13187	11783	pp	P62259 (pp) Q9JLM8	false
13188	11782	pp	P62259 (pp) O88935	false
13189	11781	pp	P62259 (pp) P10637	false
13190	11780	pp	P62259 (pp) P63101	false
13191	11779	pp	P62259 (pp) Q9QWI6	false
13192	11778	pp	P62259 (pp) P16858	false
13193	11777	pp	P62259 (pp) Q9DC28	false
13194	11776	pp	P62259 (pp) Q03265	false
13195	11775	pp	P62259 (pp) P30999	false
13196	11774	pp	P62259 (pp) Q61316	false
13197	11773	pp	P62259 (pp) Q68FF6	false
13198	11772	pp	P62259 (pp) Q3UTJ2	false
13199	11771	pp	P62259 (pp) Q812A2	false
13200	11770	pp	P47757 (pp) O89053	false
13201	11769	pp	Q8C8R3 (pp) P16546	false
13202	11768	pp	Q8C8R3 (pp) P11627	false
13203	11767	pp	P16546 (pp) Q9CQV8	false
13204	11766	pp	P16546 (pp) O08788	false
13205	11765	pp	P63330 (pp) Q76MZ3	false
13206	11764	pp	P63330 (pp) Q60996	false
13207	11763	pp	P63330 (pp) Q61151	false
13208	11762	pp	P63330 (pp) P35438	false
13209	11761	pp	P63330 (pp) Q6P1F6	false
13210	11760	pp	Q76MZ3 (pp) Q6P1F6	false
13211	11759	pp	Q76MZ3 (pp) O08788	false
13212	11758	pp	Q76MZ3 (pp) P63101	false
13213	11757	pp	Q76MZ3 (pp) P35438	false
13214	11756	pp	Q76MZ3 (pp) Q99KJ8	false
13215	11755	pp	Q76MZ3 (pp) Q60996	false
13216	11754	pp	Q76MZ3 (pp) P50396	false
13217	11753	pp	Q76MZ3 (pp) P62259	false
13218	11752	pp	Q76MZ3 (pp) P61982	false
13219	11751	pp	Q76MZ3 (pp) P18052	false
13220	11750	pp	Q76MZ3 (pp) Q61151	false
13221	11749	pp	Q76MZ3 (pp) Q9DC28	false
13222	11748	pp	Q9CQZ6 (pp) Q9CQ54	false
13223	11747	pp	Q9CQZ6 (pp) Q99LC3	false
13224	11746	pp	Q9CQZ6 (pp) Q3UIU2	false
13225	11745	pp	Q9CQZ6 (pp) Q9CQH3	false
13226	11744	pp	Q9CQZ6 (pp) Q9CR68	false
13227	11743	pp	Q9CQZ6 (pp) Q9DCS9	false
13228	11742	pp	Q9CQZ6 (pp) Q06185	false
13229	11741	pp	Q9CQZ6 (pp) Q9D6J6	false
13230	11740	pp	Q9CQZ6 (pp) Q9WUM5	false
13231	11739	pp	Q9CQZ6 (pp) Q62425	false
13232	11738	pp	Q9CQZ6 (pp) Q9ERS2	false
13233	11737	pp	Q9CQZ6 (pp) Q8K3J1	false
13234	11736	pp	Q9CQZ6 (pp) Q91YT0	false
13235	11735	pp	Q9CQZ6 (pp) Q91VR2	false
13236	11734	pp	Q9CQZ6 (pp) Q99LY9	false
13237	11733	pp	Q9CQZ6 (pp) Q9DCX2	false
13238	11732	pp	Q9CQZ6 (pp) Q9DB77	false
13239	11731	pp	Q9CQZ6 (pp) P56391	false
13240	11730	pp	Q9CQZ6 (pp) Q9DC69	false
13241	11729	pp	Q9CQZ6 (pp) Q9Z1P6	false
13242	11728	pp	Q9CQZ6 (pp) Q9CPQ8	false
13243	11727	pp	Q9CQZ6 (pp) Q99LC5	false
13244	11726	pp	Q9CQZ6 (pp) Q9DCJ5	false
13245	11725	pp	Q9CQZ6 (pp) P48771	false
13246	11724	pp	Q9CQZ6 (pp) Q9CQQ7	false
13247	11723	pp	Q9CQZ6 (pp) Q99LX0	false
13248	11722	pp	Q9CQZ6 (pp) Q9CQ69	false
13249	11721	pp	Q9CQ54 (pp) Q91YT0	false
13250	11720	pp	Q9CQ54 (pp) O09111	false
13251	11719	pp	Q9CQ54 (pp) Q9DC69	false
13252	11718	pp	Q9CQ54 (pp) Q9CQQ7	false
13253	11717	pp	Q9CQ54 (pp) Q9DCJ5	false
13254	11716	pp	Q9CQ54 (pp) Q06185	false
13255	11715	pp	Q9CQ54 (pp) Q8K3J1	false
13256	11714	pp	Q9CQ54 (pp) Q9CQ69	false
13257	11713	pp	Q9CQ54 (pp) Q9D6J6	false
13258	11712	pp	Q9CQ54 (pp) Q9DCS9	false
13259	11711	pp	Q9CQ54 (pp) Q99LY9	false
13260	11710	pp	Q9CQ54 (pp) Q9CQH3	false
13261	11709	pp	Q9CQ54 (pp) Q9Z1P6	false
13262	11708	pp	Q9CQ54 (pp) Q3UIU2	false
13263	11707	pp	Q9DCT2 (pp) Q9CQ69	false
13264	11706	pp	Q9DCT2 (pp) P19783	false
13265	11705	pp	Q9DCT2 (pp) Q99LC3	false
13266	11704	pp	Q9DCT2 (pp) O70325	false
13267	11703	pp	Q9DCT2 (pp) Q9CQA3	false
13268	11702	pp	Q9DCT2 (pp) Q8K1Z0	false
13269	11701	pp	Q9DCT2 (pp) P19536	false
13270	11700	pp	Q9DCT2 (pp) Q9DC70	false
13271	11699	pp	Q9DCT2 (pp) Q3UIU2	false
13272	11698	pp	Q9DCT2 (pp) Q9DB77	false
13273	11697	pp	Q9DCT2 (pp) Q9CQQ7	false
13274	11696	pp	Q9DCT2 (pp) Q9D6J6	false
13275	11695	pp	Q9DCT2 (pp) Q9DCS9	false
13276	11694	pp	Q9DCT2 (pp) Q9D3D9	false
13277	11693	pp	Q9DCT2 (pp) P48771	false
13278	11692	pp	Q9DCT2 (pp) P17751	false
13279	11691	pp	Q9DCT2 (pp) Q8K3J1	false
13280	11690	pp	Q9DCT2 (pp) Q91WD5	false
13281	11689	pp	Q9DCT2 (pp) Q9D6J5	false
13282	11688	pp	Q9DCT2 (pp) P56391	false
13283	11687	pp	Q9DCT2 (pp) Q9ERS2	false
13284	11686	pp	Q9DCT2 (pp) Q03265	false
13285	11685	pp	Q9DCT2 (pp) Q8BGH2	false
13286	11684	pp	Q9DCT2 (pp) Q9CQC7	false
13287	11683	pp	Q9DCT2 (pp) Q9WUM5	false
13288	11682	pp	Q9DCT2 (pp) Q9CQJ8	false
13289	11681	pp	Q9DCT2 (pp) Q9CXZ1	false
13290	11680	pp	Q9DCT2 (pp) Q99LC5	false
13291	11679	pp	Q9DCT2 (pp) Q99LY9	false
13292	11678	pp	Q9DCT2 (pp) Q7TMF3	false
13293	11677	pp	Q9DCT2 (pp) Q9CR68	false
13294	11676	pp	Q9DCT2 (pp) P42125	false
13295	11675	pp	Q9DCT2 (pp) Q9CQZ6	false
13296	11674	pp	Q9DCT2 (pp) P99029	false
13297	11673	pp	Q9DCT2 (pp) Q9D051	false
13298	11672	pp	Q9DCT2 (pp) Q9DC69	false
13299	11671	pp	Q9DCT2 (pp) Q9D855	false
13300	11670	pp	Q9DCT2 (pp) Q9DCX2	false
13301	11669	pp	Q9DCT2 (pp) Q9CQR4	false
13302	11668	pp	Q9DCT2 (pp) Q9DCJ5	false
13303	11667	pp	Q9DCT2 (pp) P09671	false
13304	11666	pp	Q9DCT2 (pp) P56480	false
13305	11665	pp	Q9DCT2 (pp) Q8K2B3	false
13306	11664	pp	Q9DCT2 (pp) Q9CQ75	false
13307	11663	pp	Q9DCT2 (pp) P52503	false
13308	11662	pp	Q9DCT2 (pp) Q91VD9	false
13309	11661	pp	Q9DCT2 (pp) Q8BH95	false
13310	11660	pp	Q9DCT2 (pp) Q91YT0	false
13311	11659	pp	Q9DCT2 (pp) P56379	false
13312	11658	pp	Q9DCT2 (pp) Q9CZ13	false
13313	11657	pp	Q9DCT2 (pp) Q9DB20	false
13314	11656	pp	Q9DCT2 (pp) Q8VEM8	false
13315	11655	pp	Q9DCT2 (pp) Q9CPP6	false
13316	11654	pp	Q9DCT2 (pp) Q9CQ54	false
13317	11653	pp	Q9DCT2 (pp) Q9D0M3	false
13318	11652	pp	Q9DCT2 (pp) Q99KI0	false
13319	11651	pp	Q9DCT2 (pp) Q91VR2	false
13320	11650	pp	Q9DCT2 (pp) O88441	false
13321	11649	pp	Q9DCT2 (pp) Q9CQH3	false
13322	11648	pp	Q9DCT2 (pp) Q62425	false
13323	11647	pp	Q9DCT2 (pp) O09111	false
13324	11646	pp	Q9DCT2 (pp) P68510	false
13325	11645	pp	Q9DCT2 (pp) P62073	false
13326	11644	pp	Q9DCT2 (pp) P08249	false
13327	11643	pp	Q9DCT2 (pp) Q9CPQ1	false
13328	11642	pp	Q9DCT2 (pp) Q9D0S9	false
13329	11641	pp	Q9DCT2 (pp) P50516	false
13330	11640	pp	Q9DCT2 (pp) P97807	false
13331	11639	pp	Q9DCT2 (pp) Q9Z1P6	false
13332	11638	pp	Q9DCT2 (pp) Q9CR62	false
13333	11637	pp	Q9DCT2 (pp) Q9CZU6	false
13334	11636	pp	Q9DCT2 (pp) Q80Y14	false
13335	11635	pp	Q9DCT2 (pp) Q9CQZ5	false
13336	11634	pp	Q9DCT2 (pp) P70404	false
13337	11633	pp	Q9DCT2 (pp) Q06185	false
13338	11632	pp	Q9DCT2 (pp) Q99LX0	false
13339	11631	pp	Q9DCT2 (pp) P97450	false
13340	11630	pp	Q9CQ69 (pp) P56391	false
13341	11629	pp	Q9CQ69 (pp) Q8K3J1	false
13342	11628	pp	Q9CQ69 (pp) Q99LY9	false
13343	11627	pp	Q9CQ69 (pp) Q9D6J6	false
13344	11626	pp	Q9CQ69 (pp) Q9DCJ5	false
13345	11625	pp	Q9CQ69 (pp) Q9CQH3	false
13346	11624	pp	Q9CQ69 (pp) Q9DC69	false
13347	11623	pp	Q9CQ69 (pp) Q9ERS2	false
13348	11622	pp	Q9CQ69 (pp) Q9D3D9	false
13349	11621	pp	Q9CQ69 (pp) P00405	false
13350	11620	pp	Q9CQ69 (pp) Q91VR2	false
13351	11619	pp	Q9CQ69 (pp) Q3UIU2	false
13352	11618	pp	Q9CQ69 (pp) P17665	false
13353	11617	pp	Q9CQ69 (pp) O09111	false
13354	11616	pp	Q9CQ69 (pp) Q9CQQ7	false
13355	11615	pp	Q9CQ69 (pp) Q99LX0	false
13356	11614	pp	P08249 (pp) Q9D6R2	false
13357	11613	pp	P08249 (pp) Q06185	false
13358	11612	pp	P08249 (pp) Q91VR2	false
13359	11611	pp	P08249 (pp) P70404	false
13360	11610	pp	P08249 (pp) O35658	false
13361	11609	pp	P08249 (pp) P17751	false
13362	11608	pp	P08249 (pp) Q9DCD0	false
13363	11607	pp	P08249 (pp) P56480	false
13364	11606	pp	P08249 (pp) Q9D3D9	false
13365	11605	pp	P08249 (pp) P97807	false
13366	11604	pp	P08249 (pp) Q64521	false
13367	11603	pp	P08249 (pp) Q60931	false
13368	11602	pp	P08249 (pp) Q8BGH2	false
13369	11601	pp	P08249 (pp) Q9D051	false
13370	11600	pp	P08249 (pp) Q9D855	false
13371	11599	pp	P08249 (pp) Q8K2B3	false
13372	11598	pp	P08249 (pp) P05202	false
13373	11597	pp	P08249 (pp) Q9DC70	false
13374	11596	pp	P08249 (pp) Q8BH04	false
13375	11595	pp	P08249 (pp) P63038	false
13376	11594	pp	P08249 (pp) Q9D6J6	false
13377	11593	pp	P08249 (pp) Q9CQC7	false
13378	11592	pp	P08249 (pp) Q9CR68	false
13379	11591	pp	P08249 (pp) Q9DB77	false
13380	11590	pp	P08249 (pp) P09411	false
13381	11589	pp	P08249 (pp) Q9DC69	false
13382	11588	pp	P08249 (pp) Q8K3J1	false
13383	11587	pp	P08249 (pp) Q8BMF3	false
13384	11586	pp	P08249 (pp) Q8BMF4	false
13385	11585	pp	P08249 (pp) Q9CQJ8	false
13386	11584	pp	P08249 (pp) Q8VEM8	false
13387	11583	pp	P08249 (pp) Q99KI0	false
13388	11582	pp	P08249 (pp) O09111	false
13389	11581	pp	P08249 (pp) Q99LX0	false
13390	11580	pp	P08249 (pp) Q9DCX2	false
13391	11579	pp	P08249 (pp) Q05920	false
13392	11578	pp	P08249 (pp) Q91YT0	false
13393	11577	pp	P08249 (pp) Q9Z2I9	false
13394	11576	pp	P08249 (pp) P19783	false
13395	11575	pp	P08249 (pp) Q91VD9	false
13396	11574	pp	P08249 (pp) Q9DB20	false
13397	11573	pp	P08249 (pp) P54071	false
13398	11572	pp	P08249 (pp) P52480	false
13399	11571	pp	P08249 (pp) Q9D2G2	false
13400	11570	pp	P08249 (pp) Q9DCJ5	false
13401	11569	pp	P08249 (pp) P97450	false
13402	11568	pp	P08249 (pp) Q9WUM5	false
13403	11567	pp	P08249 (pp) P26443	false
13404	11566	pp	P08249 (pp) Q9CQZ5	false
13405	11565	pp	P08249 (pp) Q9CZ13	false
13406	11564	pp	P08249 (pp) Q9D0M3	false
13407	11563	pp	P08249 (pp) P06745	false
13408	11562	pp	P08249 (pp) P48962	false
13409	11561	pp	P08249 (pp) Q03265	false
13410	11560	pp	P08249 (pp) Q9CQH3	false
13411	11559	pp	P08249 (pp) Q9CQQ7	false
13412	11558	pp	P08249 (pp) Q9DCS9	false
13413	11557	pp	Q9D6R2 (pp) P70404	false
13414	11556	pp	Q9D6R2 (pp) P16054	false
13415	11555	pp	Q9D6R2 (pp) Q8BWF0	false
13416	11554	pp	Q9D6R2 (pp) Q91VR2	false
13417	11553	pp	Q9D6R2 (pp) Q8K3J1	false
13418	11552	pp	Q9D6R2 (pp) Q60597	false
13419	11551	pp	Q9D6R2 (pp) P54071	false
13420	11550	pp	Q9D6R2 (pp) Q9D2G2	false
13421	11549	pp	Q9D6R2 (pp) Q9WUM5	false
13422	11548	pp	P54071 (pp) P06151	false
13423	11547	pp	P54071 (pp) Q60597	false
13424	11546	pp	P54071 (pp) P70404	false
13425	11545	pp	Q9DB20 (pp) Q9CQH3	false
13426	11544	pp	Q9DB20 (pp) P67778	false
13427	11543	pp	Q9DB20 (pp) Q9DCX2	false
13428	11542	pp	Q9DB20 (pp) O09111	false
13429	11541	pp	Q9DB20 (pp) Q9D6J5	false
13430	11540	pp	Q9DB20 (pp) Q99LX0	false
13431	11539	pp	Q9DB20 (pp) Q9DCJ5	false
13432	11538	pp	Q9DB20 (pp) Q9CPP6	false
13433	11537	pp	Q9DB20 (pp) P99029	false
13434	11536	pp	Q9DB20 (pp) Q9CQ69	false
13435	11535	pp	Q9DB20 (pp) Q9CR68	false
13436	11534	pp	Q9DB20 (pp) P97807	false
13437	11533	pp	Q9DB20 (pp) Q9CZ13	false
13438	11532	pp	Q9DB20 (pp) Q9D6J6	false
13439	11531	pp	Q9DB20 (pp) P19783	false
13440	11530	pp	Q9DB20 (pp) P56391	false
13441	11529	pp	Q9DB20 (pp) Q3UIU2	false
13442	11528	pp	Q9DB20 (pp) Q9DC69	false
13443	11527	pp	Q9DB20 (pp) Q9CQQ7	false
13444	11526	pp	Q9DB20 (pp) P62073	false
13445	11525	pp	Q9DB20 (pp) Q9ERS2	false
13446	11524	pp	Q9DB20 (pp) Q9D3D9	false
13447	11523	pp	Q9DB20 (pp) Q91YT0	false
13448	11522	pp	Q9DB20 (pp) Q9WUM5	false
13449	11521	pp	Q9DB20 (pp) P17751	false
13450	11520	pp	Q9DB20 (pp) Q78IK2	false
13451	11519	pp	Q9DB20 (pp) Q8K3J1	false
13452	11518	pp	Q9DB20 (pp) Q06185	false
13453	11517	pp	Q9DB20 (pp) Q91VM9	false
13454	11516	pp	Q9DB20 (pp) Q9DCS9	false
13455	11515	pp	Q9DB20 (pp) P43024	false
13456	11514	pp	Q9DB20 (pp) P56480	false
13457	11513	pp	Q9DB20 (pp) Q03265	false
13458	11512	pp	Q9DB20 (pp) Q9Z1P6	false
13459	11511	pp	Q9DB20 (pp) Q9CPQ8	false
13460	11510	pp	Q9DB20 (pp) Q91VR2	false
13461	11509	pp	Q9DB20 (pp) Q9DB77	false
13462	11508	pp	Q9CQH3 (pp) Q9D6J6	false
13463	11507	pp	Q3UHD9 (pp) Q9Z2H5	false
13464	11506	pp	Q9Z2H5 (pp) Q99N28	false
13465	11505	pp	Q6P9K8 (pp) O88952	false
13466	11504	pp	Q6P9K8 (pp) O70589	false
13467	11503	pp	O88952 (pp) P60469	false
13468	11502	pp	O88952 (pp) O70589	false
13469	11501	pp	P19783 (pp) Q9CQH3	false
13470	11500	pp	P19783 (pp) Q9CQ69	false
13471	11499	pp	P19783 (pp) Q9CR68	false
13472	11498	pp	P19783 (pp) P19536	false
13473	11497	pp	P19783 (pp) Q9D3D9	false
13474	11496	pp	P19783 (pp) Q91YT0	false
13475	11495	pp	P19783 (pp) Q06185	false
13476	11494	pp	P19783 (pp) Q91VR2	false
13477	11493	pp	P19783 (pp) Q9ERS2	false
13478	11492	pp	P19783 (pp) P17665	false
13479	11491	pp	P19783 (pp) Q9DCX2	false
13480	11490	pp	P19783 (pp) Q99LX0	false
13481	11489	pp	P19783 (pp) Q9CQQ7	false
13482	11488	pp	P19783 (pp) P56391	false
13483	11487	pp	P19783 (pp) P43024	false
13484	11486	pp	P19783 (pp) P00405	false
13485	11485	pp	P19783 (pp) Q9DCJ5	false
13486	11484	pp	P19783 (pp) P48771	false
13487	11483	pp	P19783 (pp) Q9DC69	false
13488	11482	pp	Q8BK64 (pp) P63038	false
13489	11481	pp	Q8BK64 (pp) Q60864	false
13490	11480	pp	Q8BK64 (pp) P07901	false
13491	11479	pp	Q8BK64 (pp) Q61699	false
13492	11478	pp	Q8BK64 (pp) P11499	false
13493	11477	pp	P63038 (pp) P52196	false
13494	11476	pp	P63038 (pp) P09411	false
13495	11475	pp	P63038 (pp) Q99LC5	false
13496	11474	pp	P63038 (pp) P52480	false
13497	11473	pp	P63038 (pp) P15105	false
13498	11472	pp	P63038 (pp) Q9WUM5	false
13499	11471	pp	P63038 (pp) Q9Z0X1	false
13500	11470	pp	P63038 (pp) Q6PB66	false
13501	11469	pp	P63038 (pp) Q8BIJ6	false
13502	11468	pp	P63038 (pp) P63037	false
13503	11467	pp	P63038 (pp) Q925I1	false
13504	11466	pp	P63038 (pp) Q8CGK3	false
13505	11465	pp	P63038 (pp) Q921G7	false
13506	11464	pp	P63038 (pp) Q91VR2	false
13507	11463	pp	P63038 (pp) Q61699	false
13508	11462	pp	P63038 (pp) P17156	false
13509	11461	pp	P63038 (pp) O35658	false
13510	11460	pp	P63038 (pp) P67778	false
13511	11459	pp	P63038 (pp) P97807	false
13512	11458	pp	Q8BH95 (pp) Q9CZ13	false
13513	11457	pp	Q8BH95 (pp) Q8BWT1	false
13514	11456	pp	Q8BH95 (pp) Q8QZT1	false
13515	11455	pp	Q8BH95 (pp) P51174	false
13516	11454	pp	Q8BH95 (pp) P50544	false
13517	11453	pp	Q8BH95 (pp) Q9JHI5	false
13518	11452	pp	Q8BH95 (pp) Q8BMS1	false
13519	11451	pp	Q8BH95 (pp) Q99MN9	false
13520	11450	pp	Q8BH95 (pp) O08756	false
13521	11449	pp	Q8BH95 (pp) Q61425	false
13522	11448	pp	Q8BH95 (pp) Q99JY0	false
13523	11447	pp	Q8BH95 (pp) Q99MR8	false
13524	11446	pp	Q8BH95 (pp) Q9DCJ5	false
13525	11445	pp	Q8BH95 (pp) Q9WUM5	false
13526	11444	pp	Q8BH95 (pp) Q9CQ62	false
13527	11443	pp	Q8BH95 (pp) Q99LC5	false
13528	11442	pp	Q8BH95 (pp) Q9DC69	false
13529	11441	pp	Q8BH95 (pp) Q9DBL1	false
13530	11440	pp	Q9CZ13 (pp) Q9ERS2	false
13531	11439	pp	Q9CZ13 (pp) Q9DCS9	false
13532	11438	pp	Q9CZ13 (pp) P97807	false
13533	11437	pp	Q9CZ13 (pp) P67778	false
13534	11436	pp	Q9CZ13 (pp) Q91VD9	false
13535	11435	pp	Q9CZ13 (pp) Q9D3D9	false
13536	11434	pp	Q9CZ13 (pp) Q91YT0	false
13537	11433	pp	Q9CZ13 (pp) O09111	false
13538	11432	pp	Q9CZ13 (pp) Q8K1Z0	false
13539	11431	pp	Q9CZ13 (pp) Q60597	false
13540	11430	pp	Q9CZ13 (pp) Q9CQ69	false
13541	11429	pp	Q9CZ13 (pp) Q9DCJ5	false
13542	11428	pp	Q9CZ13 (pp) Q9Z1P6	false
13543	11427	pp	Q9CZ13 (pp) Q9WUM5	false
13544	11426	pp	Q9CZ13 (pp) P19783	false
13545	11425	pp	Q9CZ13 (pp) Q9D6J6	false
13546	11424	pp	Q9CZ13 (pp) Q91VR2	false
13547	11423	pp	Q9CZ13 (pp) Q8K3J1	false
13548	11422	pp	Q9CZ13 (pp) Q9CQH3	false
13549	11421	pp	Q9CZ13 (pp) Q99P72	false
13550	11420	pp	Q9CZ13 (pp) Q9DC69	false
13551	11419	pp	Q9CZ13 (pp) Q9DB77	false
13552	11418	pp	Q9CZ13 (pp) Q9CR68	false
13553	11417	pp	Q9CZ13 (pp) Q99LY9	false
13554	11416	pp	Q9D0M3 (pp) Q9DB20	false
13555	11415	pp	Q9D0M3 (pp) P62897	false
13556	11414	pp	Q9D0M3 (pp) P70404	false
13557	11413	pp	Q9D0M3 (pp) O09111	false
13558	11412	pp	Q9D0M3 (pp) P97807	false
13559	11411	pp	Q9D0M3 (pp) Q9D3D9	false
13560	11410	pp	Q9D0M3 (pp) Q9ERS2	false
13561	11409	pp	Q9D0M3 (pp) Q9CQZ6	false
13562	11408	pp	Q9D0M3 (pp) Q9CQ69	false
13563	11407	pp	Q9D0M3 (pp) P97450	false
13564	11406	pp	Q9D0M3 (pp) Q06185	false
13565	11405	pp	Q9D0M3 (pp) Q9WUM5	false
13566	11404	pp	Q9D0M3 (pp) Q91VD9	false
13567	11403	pp	Q9D0M3 (pp) P17751	false
13568	11402	pp	Q9D0M3 (pp) Q9DB77	false
13569	11401	pp	Q9D0M3 (pp) P19536	false
13570	11400	pp	Q9D0M3 (pp) Q91VR2	false
13571	11399	pp	Q9D0M3 (pp) P50516	false
13572	11398	pp	Q9D0M3 (pp) Q9DCX2	false
13573	11397	pp	Q9D0M3 (pp) Q9CR68	false
13574	11396	pp	Q9D0M3 (pp) Q91YT0	false
13575	11395	pp	Q9D0M3 (pp) Q9D6J6	false
13576	11394	pp	Q9D0M3 (pp) P62073	false
13577	11393	pp	Q9D0M3 (pp) Q8K3J1	false
13578	11392	pp	Q9D0M3 (pp) Q64521	false
13579	11391	pp	Q9D0M3 (pp) P56391	false
13580	11390	pp	Q9D0M3 (pp) Q8VEM8	false
13581	11389	pp	Q9D0M3 (pp) P42125	false
13582	11388	pp	Q9D0M3 (pp) Q99LC3	false
13583	11387	pp	Q9D0M3 (pp) Q99LX0	false
13584	11386	pp	Q9D0M3 (pp) P43024	false
13585	11385	pp	Q9D0M3 (pp) Q9DC69	false
13586	11384	pp	Q9D0M3 (pp) Q9CQQ7	false
13587	11383	pp	Q9D0M3 (pp) Q9D2G2	false
13588	11382	pp	Q9D0M3 (pp) Q9DCJ5	false
13589	11381	pp	Q9D0M3 (pp) P48771	false
13590	11380	pp	Q9D0M3 (pp) Q9CZ13	false
13591	11379	pp	Q9D0M3 (pp) Q9CQH3	false
13592	11378	pp	Q9D0M3 (pp) Q9Z1P6	false
13593	11377	pp	Q9D0M3 (pp) P00405	false
13594	11376	pp	Q9D0M3 (pp) P19783	false
13595	11375	pp	Q9D0M3 (pp) Q9CPP6	false
13596	11374	pp	Q9D0M3 (pp) Q03265	false
13597	11373	pp	Q9D0M3 (pp) O35658	false
13598	11372	pp	Q9D0M3 (pp) P56480	false
13599	11371	pp	Q99LC3 (pp) Q99LY9	false
13600	11370	pp	Q99LC3 (pp) Q9Z1P6	false
13601	11369	pp	Q99LC3 (pp) Q9DCJ5	false
13602	11368	pp	Q99LC3 (pp) P50516	false
13603	11367	pp	Q99LC3 (pp) O09111	false
13604	11366	pp	Q99LC3 (pp) Q9D6J6	false
13605	11365	pp	Q99LC3 (pp) Q9CQH3	false
13606	11364	pp	Q99LC3 (pp) Q9DB77	false
13607	11363	pp	Q99LC3 (pp) Q91YT0	false
13608	11362	pp	Q99LC3 (pp) Q9CQ54	false
13609	11361	pp	Q99LC3 (pp) Q9DCS9	false
13610	11360	pp	Q99LC3 (pp) Q9CQ69	false
13611	11359	pp	Q99LC3 (pp) Q9DC69	false
13612	11358	pp	Q99LC3 (pp) Q9D3D9	false
13613	11357	pp	Q99LC3 (pp) Q8K3J1	false
13614	11356	pp	Q99LY9 (pp) Q9ERS2	false
13615	11355	pp	Q99LY9 (pp) Q9CQH3	false
13616	11354	pp	Q99LY9 (pp) Q9D6J6	false
13617	11353	pp	Q8BMF4 (pp) Q05920	false
13618	11352	pp	Q8BMF4 (pp) Q8BWT1	false
13619	11351	pp	Q8BMF4 (pp) Q9D2G2	false
13620	11350	pp	Q8BMF4 (pp) P63101	false
13621	11349	pp	Q8BMF4 (pp) Q9WUM5	false
13622	11348	pp	Q8BMF4 (pp) Q99JY0	false
13623	11347	pp	Q8BMF4 (pp) Q922H2	false
13624	11346	pp	Q05920 (pp) P06151	false
13625	11345	pp	Q05920 (pp) P15105	false
13626	11344	pp	P63085 (pp) P35438	false
13627	11343	pp	P63085 (pp) Q64010	false
13628	11342	pp	P63085 (pp) P07901	false
13629	11341	pp	P61027 (pp) Q61598	false
13630	11340	pp	Q61598 (pp) Q91VR2	false
13631	11339	pp	Q61598 (pp) P63011	false
13632	11338	pp	Q61598 (pp) Q99PT1	false
13633	11337	pp	Q61598 (pp) P62821	false
13634	11336	pp	P56480 (pp) P17742	false
13635	11335	pp	P56480 (pp) Q9D2G2	false
13636	11334	pp	P56480 (pp) P63038	false
13637	11333	pp	P56480 (pp) P50516	false
13638	11332	pp	P56480 (pp) P09103	false
13639	11331	pp	P56480 (pp) Q9D3D9	false
13640	11330	pp	P56480 (pp) Q60864	false
13641	11329	pp	P56480 (pp) P03930	false
13642	11328	pp	P56480 (pp) Q06185	false
13643	11327	pp	P56480 (pp) Q99LX0	false
13644	11326	pp	P56480 (pp) Q9WUM5	false
13645	11325	pp	P56480 (pp) P17156	false
13646	11324	pp	P56480 (pp) Q9CZ13	false
13647	11323	pp	P56480 (pp) P19783	false
13648	11322	pp	P56480 (pp) P62259	false
13649	11321	pp	P56480 (pp) P00405	false
13650	11320	pp	P56480 (pp) P56391	false
13651	11319	pp	P56480 (pp) P15105	false
13652	11318	pp	P56480 (pp) O35143	false
13653	11317	pp	P56480 (pp) Q99LC3	false
13654	11316	pp	P56480 (pp) Q8K3J1	false
13655	11315	pp	P56480 (pp) P17182	false
13656	11314	pp	P56480 (pp) Q9DCX2	false
13657	11313	pp	P56480 (pp) Q8VEM8	false
13658	11312	pp	P56480 (pp) Q91VR2	false
13659	11311	pp	P56480 (pp) P16054	false
13660	11310	pp	P56480 (pp) Q91VD9	false
13661	11309	pp	P56480 (pp) Q9D6J6	false
13662	11308	pp	P56480 (pp) Q9CQQ7	false
13663	11307	pp	P56480 (pp) Q91YT0	false
13664	11306	pp	P56480 (pp) Q9CR68	false
13665	11305	pp	P56480 (pp) P97807	false
13666	11304	pp	P56480 (pp) Q03265	false
13667	11303	pp	P68404 (pp) P35438	false
13668	11302	pp	P68404 (pp) P26645	false
13669	11301	pp	P67778 (pp) P50516	false
13670	11300	pp	Q9JLJ2 (pp) Q91VR2	false
13671	11299	pp	Q9JLJ2 (pp) Q9EQ20	false
13672	11298	pp	Q9JLJ2 (pp) Q61425	false
13673	11297	pp	Q9JLJ2 (pp) Q8CHT0	false
13674	11296	pp	Q9JLJ2 (pp) Q8BW75	false
13675	11295	pp	Q9JLJ2 (pp) P61922	false
13676	11294	pp	Q91VR2 (pp) O09111	false
13677	11293	pp	Q91VR2 (pp) Q9CQH3	false
13678	11292	pp	Q91VR2 (pp) Q9D6J6	false
13679	11291	pp	Q9CPQ8 (pp) Q9CQH3	false
13680	11290	pp	Q9CPQ8 (pp) Q9D6J6	false
13681	11289	pp	Q91VD9 (pp) Q9ERS2	false
13682	11288	pp	Q91VD9 (pp) Q9DC69	false
13683	11287	pp	Q91VD9 (pp) Q91YT0	false
13684	11286	pp	Q91VD9 (pp) Q99LY9	false
13685	11285	pp	Q91VD9 (pp) Q3UIU2	false
13686	11284	pp	Q91VD9 (pp) Q99LC5	false
13687	11283	pp	Q91VD9 (pp) Q8K3J1	false
13688	11282	pp	Q91VD9 (pp) Q9Z1P6	false
13689	11281	pp	Q91VD9 (pp) Q8BMF4	false
13690	11280	pp	Q91VD9 (pp) Q9DCJ5	false
13691	11279	pp	Q91VD9 (pp) Q9CQ54	false
13692	11278	pp	Q91VD9 (pp) Q9CQQ7	false
13693	11277	pp	Q91VD9 (pp) P97807	false
13694	11276	pp	Q91VD9 (pp) Q9DB77	false
13695	11275	pp	Q91VD9 (pp) Q99LC3	false
13696	11274	pp	Q91VD9 (pp) Q6PB66	false
13697	11273	pp	Q91VD9 (pp) Q9DCS9	false
13698	11272	pp	Q91VD9 (pp) Q9WUM5	false
13699	11271	pp	Q91VD9 (pp) Q9CR68	false
13700	11270	pp	Q91VD9 (pp) Q9CQH3	false
13701	11269	pp	Q91VD9 (pp) Q91VR2	false
13702	11268	pp	Q91VD9 (pp) Q9CQ69	false
13703	11267	pp	Q91VD9 (pp) O09111	false
13704	11266	pp	Q91VD9 (pp) Q9D2G2	false
13705	11265	pp	Q91VD9 (pp) Q9CQZ6	false
13706	11264	pp	Q91VD9 (pp) Q9D6J6	false
13707	11263	pp	Q9DCS9 (pp) Q9CR68	false
13708	11262	pp	Q9DCS9 (pp) Q9DC69	false
13709	11261	pp	Q9DCS9 (pp) Q9CQQ7	false
13710	11260	pp	Q9DCS9 (pp) Q06185	false
13711	11259	pp	Q9DCS9 (pp) Q9CPQ8	false
13712	11258	pp	Q9DCS9 (pp) Q9D3D9	false
13713	11257	pp	Q9DCS9 (pp) Q9DCX2	false
13714	11256	pp	Q9DCS9 (pp) Q9D6J6	false
13715	11255	pp	Q9DCS9 (pp) Q9ERS2	false
13716	11254	pp	Q9DCS9 (pp) Q9CQ69	false
13717	11253	pp	Q9DCS9 (pp) Q8K3J1	false
13718	11252	pp	Q9DCS9 (pp) Q9DCJ5	false
13719	11251	pp	Q9DCS9 (pp) Q9CQH3	false
13720	11250	pp	Q9DCS9 (pp) O09111	false
13721	11249	pp	Q9CR68 (pp) P43024	false
13722	11248	pp	Q9CR68 (pp) Q9D2G2	false
13723	11247	pp	Q9CR68 (pp) Q06185	false
13724	11246	pp	Q9CR68 (pp) Q9CQQ7	false
13725	11245	pp	Q9CR68 (pp) Q8K3J1	false
13726	11244	pp	Q9CR68 (pp) Q9DCJ5	false
13727	11243	pp	Q9CR68 (pp) Q9WUM5	false
13728	11242	pp	Q9CR68 (pp) Q9ERS2	false
13729	11241	pp	Q9CR68 (pp) Q9D3D9	false
13730	11240	pp	Q9CR68 (pp) P00405	false
13731	11239	pp	Q9CR68 (pp) P56391	false
13732	11238	pp	Q9CR68 (pp) Q9CQ69	false
13733	11237	pp	Q9CR68 (pp) O88441	false
13734	11236	pp	Q9CR68 (pp) P62897	false
13735	11235	pp	Q9CR68 (pp) Q9D6J6	false
13736	11234	pp	Q9CR68 (pp) Q9DC69	false
13737	11233	pp	Q9CR68 (pp) O09111	false
13738	11232	pp	Q9CR68 (pp) Q9DCX2	false
13739	11231	pp	Q9CR68 (pp) Q8VEM8	false
13740	11230	pp	Q9CR68 (pp) Q91VR2	false
13741	11229	pp	Q9CR68 (pp) Q9CQH3	false
13742	11228	pp	Q9CR68 (pp) O35658	false
13743	11227	pp	P05132 (pp) P12367	false
13744	11226	pp	P05132 (pp) P31324	false
13745	11225	pp	P05132 (pp) P35438	false
13746	11224	pp	Q9CQJ8 (pp) Q06185	false
13747	11223	pp	Q9CQJ8 (pp) P19783	false
13748	11222	pp	Q9CQJ8 (pp) Q9DB77	false
13749	11221	pp	Q9CQJ8 (pp) Q9Z1P6	false
13750	11220	pp	Q9CQJ8 (pp) Q9DC69	false
13751	11219	pp	Q9CQJ8 (pp) O09111	false
13752	11218	pp	Q9CQJ8 (pp) Q9DB20	false
13753	11217	pp	Q9CQJ8 (pp) Q9CQ69	false
13754	11216	pp	Q9CQJ8 (pp) Q9DCJ5	false
13755	11215	pp	Q9CQJ8 (pp) P48771	false
13756	11214	pp	Q9CQJ8 (pp) Q9D0M3	false
13757	11213	pp	Q9CQJ8 (pp) Q9D6J6	false
13758	11212	pp	Q9CQJ8 (pp) Q9CQ54	false
13759	11211	pp	Q9CQJ8 (pp) P97450	false
13760	11210	pp	Q9CQJ8 (pp) Q9CZ13	false
13761	11209	pp	Q9CQJ8 (pp) P97807	false
13762	11208	pp	Q9CQJ8 (pp) Q9D023	false
13763	11207	pp	Q9CQJ8 (pp) Q9CQZ6	false
13764	11206	pp	Q9CQJ8 (pp) Q9ERS2	false
13765	11205	pp	Q9CQJ8 (pp) Q99KI0	false
13766	11204	pp	Q9CQJ8 (pp) Q91YT0	false
13767	11203	pp	Q9CQJ8 (pp) Q99LC3	false
13768	11202	pp	Q9CQJ8 (pp) Q9CPP6	false
13769	11201	pp	Q9CQJ8 (pp) Q9CPQ8	false
13770	11200	pp	Q9CQJ8 (pp) P43024	false
13771	11199	pp	Q9CQJ8 (pp) Q9CQC7	false
13772	11198	pp	Q9CQJ8 (pp) Q8K1Z0	false
13773	11197	pp	Q9CQJ8 (pp) Q9CQZ5	false
13774	11196	pp	Q9CQJ8 (pp) Q99LC5	false
13775	11195	pp	Q9CQJ8 (pp) Q8VEM8	false
13776	11194	pp	Q9CQJ8 (pp) Q03265	false
13777	11193	pp	Q9CQJ8 (pp) Q62425	false
13778	11192	pp	Q9CQJ8 (pp) Q9CR68	false
13779	11191	pp	Q9CQJ8 (pp) Q9CQH3	false
13780	11190	pp	Q9CQJ8 (pp) Q99LY9	false
13781	11189	pp	Q9CQJ8 (pp) Q8K3J1	false
13782	11188	pp	Q9CQJ8 (pp) Q9DCX2	false
13783	11187	pp	Q9CQJ8 (pp) Q91VR2	false
13784	11186	pp	Q9CQJ8 (pp) Q9D6J5	false
13785	11185	pp	Q9CQJ8 (pp) Q91VD9	false
13786	11184	pp	Q9CQJ8 (pp) Q9D3D9	false
13787	11183	pp	Q9CQJ8 (pp) P99029	false
13788	11182	pp	Q9CQJ8 (pp) P62073	false
13789	11181	pp	Q9CQJ8 (pp) Q9DCS9	false
13790	11180	pp	Q9CQJ8 (pp) Q9CQQ7	false
13791	11179	pp	Q06185 (pp) Q99LY9	false
13792	11178	pp	Q06185 (pp) Q9D6J6	false
13793	11177	pp	Q06185 (pp) Q9CQH3	false
13794	11176	pp	Q06185 (pp) P56391	false
13795	11175	pp	Q06185 (pp) Q9DCJ5	false
13796	11174	pp	Q06185 (pp) Q9CQ69	false
13797	11173	pp	Q06185 (pp) O09111	false
13798	11172	pp	Q06185 (pp) Q8K3J1	false
13799	11171	pp	Q06185 (pp) Q91VR2	false
13800	11170	pp	Q06185 (pp) Q9D3D9	false
13801	11169	pp	Q06185 (pp) Q9ERS2	false
13802	11168	pp	Q06185 (pp) Q9CQQ7	false
13803	11167	pp	Q06185 (pp) Q9DCX2	false
13804	11166	pp	Q06185 (pp) P03930	false
13805	11165	pp	Q9DC70 (pp) Q9D0S9	false
13806	11164	pp	Q9DC70 (pp) Q03265	false
13807	11163	pp	Q9DC70 (pp) Q9CQZ5	false
13808	11162	pp	Q9DC70 (pp) Q8K2B3	false
13809	11161	pp	Q9DC70 (pp) P62073	false
13810	11160	pp	Q9DC70 (pp) Q9Z1P6	false
13811	11159	pp	Q9DC70 (pp) P42125	false
13812	11158	pp	Q9DC70 (pp) Q9CQH3	false
13813	11157	pp	Q9DC70 (pp) P56391	false
13814	11156	pp	Q9DC70 (pp) P52503	false
13815	11155	pp	Q9DC70 (pp) P97450	false
13816	11154	pp	Q9DC70 (pp) Q99LC3	false
13817	11153	pp	Q9DC70 (pp) Q99KI0	false
13818	11152	pp	Q9DC70 (pp) P17751	false
13819	11151	pp	Q9DC70 (pp) Q9D0M3	false
13820	11150	pp	Q9DC70 (pp) Q9DCJ5	false
13821	11149	pp	Q9DC70 (pp) Q9DCX2	false
13822	11148	pp	Q9DC70 (pp) Q9D855	false
13823	11147	pp	Q9DC70 (pp) Q9DB20	false
13824	11146	pp	Q9DC70 (pp) Q3UIU2	false
13825	11145	pp	Q9DC70 (pp) Q9CR68	false
13826	11144	pp	Q9DC70 (pp) Q91YT0	false
13827	11143	pp	Q9DC70 (pp) Q9CPP6	false
13828	11142	pp	Q9DC70 (pp) P56480	false
13829	11141	pp	Q9DC70 (pp) P70404	false
13830	11140	pp	Q9DC70 (pp) Q9ERS2	false
13831	11139	pp	Q9DC70 (pp) Q9CQJ8	false
13832	11138	pp	Q9DC70 (pp) Q8K3J1	false
13833	11137	pp	Q9DC70 (pp) Q9CQ69	false
13834	11136	pp	Q9DC70 (pp) O09111	false
13835	11135	pp	Q9DC70 (pp) O08756	false
13836	11134	pp	Q9DC70 (pp) Q9D3D9	false
13837	11133	pp	Q9DC70 (pp) Q9DCS9	false
13838	11132	pp	Q9DC70 (pp) Q91VR2	false
13839	11131	pp	Q9DC70 (pp) Q91Z53	false
13840	11130	pp	Q9DC70 (pp) P19783	false
13841	11129	pp	Q9DC70 (pp) Q91VD9	false
13842	11128	pp	Q9DC70 (pp) Q91VT4	false
13843	11127	pp	Q9DC70 (pp) Q9CZ13	false
13844	11126	pp	Q9DC70 (pp) Q9D6J6	false
13845	11125	pp	Q9DC70 (pp) Q06185	false
13846	11124	pp	Q9DC70 (pp) Q9CXZ1	false
13847	11123	pp	Q9DC70 (pp) Q9DC69	false
13848	11122	pp	Q9D0S9 (pp) Q91Z53	false
13849	11121	pp	Q9D0S9 (pp) O08756	false
13850	11120	pp	Q9D1K2 (pp) Q9Z1G4	false
13851	11119	pp	Q9D1K2 (pp) P62814	false
13852	11118	pp	Q9D1K2 (pp) P63082	false
13853	11117	pp	Q9D1K2 (pp) Q8K3J1	false
13854	11116	pp	Q9D1K2 (pp) Q9Z1G3	false
13855	11115	pp	Q9D1K2 (pp) Q9WTT4	false
13856	11114	pp	Q9D1K2 (pp) Q9CQZ5	false
13857	11113	pp	Q9D1K2 (pp) P51863	false
13858	11112	pp	Q9D1K2 (pp) Q9CQ75	false
13859	11111	pp	Q9D1K2 (pp) P50516	false
13860	11110	pp	Q9D1K2 (pp) Q91VM9	false
13861	11109	pp	Q9D1K2 (pp) Q9Z1P6	false
13862	11108	pp	Q9D1K2 (pp) Q8BVE3	false
13863	11107	pp	Q9D1K2 (pp) P57746	false
13864	11106	pp	Q9D1K2 (pp) P50518	false
13865	11105	pp	Q9Z1G4 (pp) P50516	false
13866	11104	pp	Q9Z1G4 (pp) Q9WTT4	false
13867	11103	pp	Q9Z1G4 (pp) P63082	false
13868	11102	pp	Q9Z1G4 (pp) Q62277	false
13869	11101	pp	Q9WUM5 (pp) Q9D0K2	false
13870	11100	pp	Q9WUM5 (pp) Q9DC69	false
13871	11099	pp	Q9WUM5 (pp) Q9CQQ7	false
13872	11098	pp	Q9WUM5 (pp) Q9DCJ5	false
13873	11097	pp	Q9WUM5 (pp) P06151	false
13874	11096	pp	Q9WUM5 (pp) Q9D6J6	false
13875	11095	pp	Q9WUM5 (pp) Q91VR2	false
13876	11094	pp	Q9WUM5 (pp) Q99JY0	false
13877	11093	pp	Q9WUM5 (pp) Q60597	false
13878	11092	pp	Q9WUM5 (pp) Q99LX0	false
13879	11091	pp	Q9WUM5 (pp) Q9ERS2	false
13880	11090	pp	Q9WUM5 (pp) Q9CQH3	false
13881	11089	pp	Q9WUM5 (pp) Q60931	false
13882	11088	pp	Q9WUM5 (pp) Q8VEM8	false
13883	11087	pp	Q9CQN1 (pp) P63037	false
13884	11086	pp	Q9CQN1 (pp) Q8K3J1	false
13885	11085	pp	Q9CQN1 (pp) Q91YT0	false
13886	11084	pp	Q9CQN1 (pp) P63038	false
13887	11083	pp	P63037 (pp) Q91VR2	false
13888	11082	pp	P63037 (pp) Q61699	false
13889	11081	pp	Q9DCW4 (pp) Q9CPP6	false
13890	11080	pp	Q9DCW4 (pp) Q9DCJ5	false
13891	11079	pp	Q9DCW4 (pp) P56391	false
13892	11078	pp	Q9DCW4 (pp) P51174	false
13893	11077	pp	Q9DCW4 (pp) Q9DB20	false
13894	11076	pp	Q9DCW4 (pp) Q9D3D9	false
13895	11075	pp	Q9DCW4 (pp) Q8JZN5	false
13896	11074	pp	Q9DCW4 (pp) Q9CQA3	false
13897	11073	pp	Q9DCW4 (pp) Q9Z2I9	false
13898	11072	pp	Q9DCW4 (pp) Q06185	false
13899	11071	pp	Q9DCW4 (pp) O09111	false
13900	11070	pp	Q9DCW4 (pp) Q9D6J5	false
13901	11069	pp	Q9DCW4 (pp) Q91YT0	false
13902	11068	pp	Q9DCW4 (pp) Q9ERS2	false
13903	11067	pp	Q9DCW4 (pp) Q8BMS1	false
13904	11066	pp	Q9DCW4 (pp) Q8K3J1	false
13905	11065	pp	Q9DCW4 (pp) P08249	false
13906	11064	pp	Q9DCW4 (pp) P17751	false
13907	11063	pp	Q9DCW4 (pp) Q91Z53	false
13908	11062	pp	Q9DCW4 (pp) Q9WUM5	false
13909	11061	pp	Q9DCW4 (pp) P42125	false
13910	11060	pp	Q9DCW4 (pp) Q9DBL1	false
13911	11059	pp	Q9DCW4 (pp) Q921G7	false
13912	11058	pp	Q9DCW4 (pp) Q99LC3	false
13913	11057	pp	Q9DCW4 (pp) Q80U28	false
13914	11056	pp	Q9DCW4 (pp) P19783	false
13915	11055	pp	Q9DCW4 (pp) Q9DC69	false
13916	11054	pp	Q9DCW4 (pp) Q99LC5	false
13917	11053	pp	Q9DCW4 (pp) P52503	false
13918	11052	pp	Q9DCW4 (pp) Q9CQJ8	false
13919	11051	pp	Q9DCW4 (pp) Q8BH95	false
13920	11050	pp	Q9DCW4 (pp) Q9DCT2	false
13921	11049	pp	Q9DCW4 (pp) Q9JHI5	false
13922	11048	pp	Q9DCW4 (pp) O08756	false
13923	11047	pp	Q9DCW4 (pp) Q8BWT1	false
13924	11046	pp	Q9DCW4 (pp) Q9DCS9	false
13925	11045	pp	Q9DCW4 (pp) Q61425	false
13926	11044	pp	Q9DCW4 (pp) Q9Z1P6	false
13927	11043	pp	Q9DCW4 (pp) Q9D6J6	false
13928	11042	pp	Q9DCW4 (pp) Q9D0S9	false
13929	11041	pp	Q9DCW4 (pp) Q8QZT1	false
13930	11040	pp	Q9DCW4 (pp) Q9DC70	false
13931	11039	pp	Q9DCW4 (pp) Q8R4N0	false
13932	11038	pp	Q9DCW4 (pp) P50544	false
13933	11037	pp	Q9CPP6 (pp) Q9D6J6	false
13934	11036	pp	Q9CPP6 (pp) Q9DB77	false
13935	11035	pp	Q9CPP6 (pp) Q9DCX2	false
13936	11034	pp	Q9CPP6 (pp) P48771	false
13937	11033	pp	Q9CPP6 (pp) Q9DCJ5	false
13938	11032	pp	Q9CPP6 (pp) Q99LY9	false
13939	11031	pp	Q9CPP6 (pp) Q9ERS2	false
13940	11030	pp	Q9CPP6 (pp) Q9CQZ6	false
13941	11029	pp	Q9CPP6 (pp) Q91VD9	false
13942	11028	pp	Q9CPP6 (pp) Q8K3J1	false
13943	11027	pp	Q9CPP6 (pp) Q9CQ69	false
13944	11026	pp	Q9CPP6 (pp) Q99LC5	false
13945	11025	pp	Q9CPP6 (pp) Q9D6J5	false
13946	11024	pp	Q9CPP6 (pp) Q9CQH3	false
13947	11023	pp	Q9CPP6 (pp) Q9WUM5	false
13948	11022	pp	Q9CPP6 (pp) Q9Z1P6	false
13949	11021	pp	Q9CPP6 (pp) P56391	false
13950	11020	pp	Q9CPP6 (pp) P43024	false
13951	11019	pp	Q9CPP6 (pp) Q91YT0	false
13952	11018	pp	P46460 (pp) Q01097	false
13953	11017	pp	P46460 (pp) Q9CWZ7	false
13954	11016	pp	P46460 (pp) Q62442	false
13955	11015	pp	P46460 (pp) O08599	false
13956	11014	pp	P46460 (pp) O35526	false
13957	11013	pp	P46460 (pp) P35438	false
13958	11012	pp	P46460 (pp) P23819	false
13959	11011	pp	P46460 (pp) P63101	false
13960	11010	pp	Q08331 (pp) Q9CQ62	false
13961	11009	pp	Q08331 (pp) Q01097	false
13962	11008	pp	Q9CQ62 (pp) Q99JY0	false
13963	11007	pp	Q9CQ62 (pp) Q8BWT1	false
13964	11006	pp	Q9CQ62 (pp) Q99LC5	false
13965	11005	pp	Q9CQ62 (pp) P19096	false
13966	11004	pp	Q9CQ62 (pp) P41216	false
13967	11003	pp	Q9D2G2 (pp) Q91VR2	false
13968	11002	pp	Q9D2G2 (pp) Q9WUM5	false
13969	11001	pp	Q9D2G2 (pp) Q60597	false
13970	11000	pp	Q9D2G2 (pp) Q9D3D9	false
13971	10999	pp	Q3UIU2 (pp) Q9D6J6	false
13972	10998	pp	Q3UIU2 (pp) Q9CQH3	false
13973	10997	pp	P31938 (pp) P63085	false
13974	10996	pp	P31938 (pp) P35438	false
13975	10995	pp	P31938 (pp) P16054	false
13976	10994	pp	P17427 (pp) P17426	false
13977	10993	pp	P17427 (pp) Q68FD5	false
13978	10992	pp	P17427 (pp) O08585	false
13979	10991	pp	P17427 (pp) Q80VP1	false
13980	10990	pp	P17427 (pp) P62743	false
13981	10989	pp	P17427 (pp) P39053	false
13982	10988	pp	P17427 (pp) Q8CHC4	false
13983	10987	pp	P17427 (pp) Q6IRU5	false
13984	10986	pp	P17427 (pp) P84091	false
13985	10985	pp	P17427 (pp) Q9DBG3	false
13986	10984	pp	P17426 (pp) P62743	false
13987	10983	pp	P17426 (pp) O08585	false
13988	10982	pp	P17426 (pp) Q80VP1	false
13989	10981	pp	P17426 (pp) Q8CHC4	false
13990	10980	pp	P57746 (pp) P50516	false
13991	10979	pp	P57746 (pp) Q8BVE3	false
13992	10978	pp	P57746 (pp) Q9Z1G4	false
13993	10977	pp	P57746 (pp) Q9CQZ6	false
13994	10976	pp	P57746 (pp) P97450	false
13995	10975	pp	P57746 (pp) Q9Z1G3	false
13996	10974	pp	P57746 (pp) Q9WTT4	false
13997	10973	pp	P57746 (pp) P23506	false
13998	10972	pp	P57746 (pp) P63082	false
13999	10971	pp	P57746 (pp) Q9CQH3	false
14000	10970	pp	P50516 (pp) Q9JHU4	false
14001	10969	pp	P50516 (pp) Q9R0K7	false
14002	10968	pp	P50516 (pp) Q8BPN8	false
14003	10967	pp	P50516 (pp) P60710	false
14004	10966	pp	P50516 (pp) Q7TPR4	false
14005	10965	pp	P50516 (pp) P39053	false
14006	10964	pp	P50516 (pp) Q7TQF7	false
14007	10963	pp	P50516 (pp) P53395	false
14008	10962	pp	P50516 (pp) P55088	false
14009	10961	pp	P50516 (pp) Q9D6J6	false
14010	10960	pp	P50516 (pp) P46460	false
14011	10959	pp	P50516 (pp) P46660	false
14012	10958	pp	P50516 (pp) Q9QYR6	false
14013	10957	pp	P50516 (pp) P01831	false
14014	10956	pp	P50516 (pp) P28660	false
14015	10955	pp	P50516 (pp) Q9D6R2	false
14016	10954	pp	P50516 (pp) P47754	false
14017	10953	pp	P50516 (pp) Q5SQX6	false
14018	10952	pp	P50516 (pp) Q5DQR4	false
14019	10951	pp	P50516 (pp) O35643	false
14020	10950	pp	P50516 (pp) Q9Z2I0	false
14021	10949	pp	P50516 (pp) Q62425	false
14022	10948	pp	P50516 (pp) P63082	false
14023	10947	pp	P50516 (pp) O08539	false
14024	10946	pp	P50516 (pp) Q9JLM8	false
14025	10945	pp	P50516 (pp) Q8VD37	false
14026	10944	pp	P50516 (pp) P17427	false
14027	10943	pp	P50516 (pp) Q99LX0	false
14028	10942	pp	P50516 (pp) Q80XN0	false
14029	10941	pp	P50516 (pp) O54983	false
14030	10940	pp	P50516 (pp) P17426	false
14031	10939	pp	P50516 (pp) Q9Z0E0	false
14032	10938	pp	P50516 (pp) Q9Z1J3	false
14033	10937	pp	P50516 (pp) Q3UHL1	false
14034	10936	pp	P50516 (pp) Q91VR2	false
14035	10935	pp	P50516 (pp) P12382	false
14036	10934	pp	P50516 (pp) P08553	false
14037	10933	pp	P70404 (pp) Q91VR2	false
14038	10932	pp	P70404 (pp) Q9WUM5	false
14039	10931	pp	P70404 (pp) Q9DC69	false
14040	10930	pp	P70404 (pp) Q60597	false
14041	10929	pp	P70404 (pp) Q9D2G2	false
14042	10928	pp	O88441 (pp) Q9D6J6	false
14043	10927	pp	O88441 (pp) Q9CQH3	false
14044	10926	pp	O88441 (pp) Q6PB66	false
14045	10925	pp	Q7TQI3 (pp) P68510	false
14046	10924	pp	P17751 (pp) P06745	false
14047	10923	pp	P17751 (pp) P05063	false
14048	10922	pp	P17751 (pp) P17182	false
14049	10921	pp	P17751 (pp) Q99LX0	false
14050	10920	pp	P17751 (pp) P09411	false
14051	10919	pp	P17751 (pp) Q93092	false
14052	10918	pp	P17751 (pp) Q9CZ13	false
14053	10917	pp	P17751 (pp) Q9D6J6	false
14054	10916	pp	P17751 (pp) P56480	false
14055	10915	pp	P17751 (pp) Q91VD9	false
14056	10914	pp	P17751 (pp) P70296	false
14057	10913	pp	P17751 (pp) Q9D2G2	false
14058	10912	pp	P17751 (pp) Q64521	false
14059	10911	pp	P17751 (pp) P47857	false
14060	10910	pp	P17751 (pp) P16858	false
14061	10909	pp	P17751 (pp) Q9WUM5	false
14062	10908	pp	P17751 (pp) P23506	false
14063	10907	pp	P17751 (pp) P99029	false
14064	10906	pp	P17751 (pp) Q8K3J1	false
14065	10905	pp	P17751 (pp) P97807	false
14066	10904	pp	P17751 (pp) Q03265	false
14067	10903	pp	P17751 (pp) P05064	false
14068	10902	pp	P17751 (pp) Q9CR68	false
14069	10901	pp	P17751 (pp) Q9WUA3	false
14070	10900	pp	P17751 (pp) Q91VR2	false
14071	10899	pp	P17751 (pp) P63101	false
14072	10898	pp	P17751 (pp) P52480	false
14073	10897	pp	P17751 (pp) P06151	false
14074	10896	pp	P17751 (pp) Q9R0P5	false
14075	10895	pp	P17751 (pp) Q91YT0	false
14076	10894	pp	P09411 (pp) Q9DCD0	false
14077	10893	pp	P09411 (pp) P17182	false
14078	10892	pp	P09411 (pp) P17742	false
14079	10891	pp	P09411 (pp) P16858	false
14080	10890	pp	P09411 (pp) P06151	false
14081	10889	pp	Q9Z1P6 (pp) Q9D6J6	false
14082	10888	pp	Q9Z1P6 (pp) Q9ERS2	false
14083	10887	pp	Q9Z1P6 (pp) P56391	false
14084	10886	pp	Q9Z1P6 (pp) Q3UIU2	false
14085	10885	pp	Q9Z1P6 (pp) Q9D3D9	false
14086	10884	pp	Q9Z1P6 (pp) Q9DC69	false
14087	10883	pp	Q9Z1P6 (pp) Q9CPQ8	false
14088	10882	pp	Q9Z1P6 (pp) Q99LX0	false
14089	10881	pp	Q9Z1P6 (pp) Q9CQ69	false
14090	10880	pp	Q9Z1P6 (pp) Q9CQH3	false
14091	10879	pp	Q9Z1P6 (pp) Q9DCJ5	false
14092	10878	pp	Q9Z1P6 (pp) Q8K3J1	false
14093	10877	pp	Q9Z1P6 (pp) Q06185	false
14094	10876	pp	Q9Z1P6 (pp) O08756	false
14095	10875	pp	Q9Z1P6 (pp) Q9DCS9	false
14096	10874	pp	Q9Z1P6 (pp) Q91YT0	false
14097	10873	pp	Q9Z1P6 (pp) Q9DCX2	false
14098	10872	pp	Q9Z1P6 (pp) O09111	false
14099	10871	pp	P63137 (pp) P62812	false
14100	10870	pp	P62812 (pp) P63328	false
14101	10869	pp	P62812 (pp) P22723	false
14102	10868	pp	O70325 (pp) Q99LX0	false
14103	10867	pp	O70325 (pp) Q9D3D9	false
14104	10866	pp	O70325 (pp) Q9ERS2	false
14105	10865	pp	O70325 (pp) P99029	false
14106	10864	pp	P48771 (pp) Q9DC69	false
14107	10863	pp	P48771 (pp) Q91VR2	false
14108	10862	pp	P48771 (pp) P56391	false
14109	10861	pp	P48771 (pp) Q99LX0	false
14110	10860	pp	P48771 (pp) Q06185	false
14111	10859	pp	P48771 (pp) Q9D6J6	false
14112	10858	pp	P48771 (pp) Q9CQH3	false
14113	10857	pp	P48771 (pp) Q9CQ69	false
14114	10856	pp	P48771 (pp) P43024	false
14115	10855	pp	Q64133 (pp) P47738	false
14116	10854	pp	Q64133 (pp) Q9JLJ2	false
14117	10853	pp	Q64133 (pp) Q9CZS1	false
14118	10852	pp	Q64133 (pp) Q9DBF1	false
14119	10851	pp	P47738 (pp) P61922	false
14120	10850	pp	P47738 (pp) Q8CHT0	false
14121	10849	pp	P47738 (pp) Q9EQ20	false
14122	10848	pp	P47738 (pp) Q8BW75	false
14123	10847	pp	P63005 (pp) Q6PER3	false
14124	10846	pp	P63005 (pp) O08788	false
14125	10845	pp	P63005 (pp) Q99KJ8	false
14126	10844	pp	P63005 (pp) P20357	false
14127	10843	pp	Q6PER3 (pp) O08788	false
14128	10842	pp	O70161 (pp) Q9Z1B3	false
14129	10841	pp	O70161 (pp) P17426	false
14130	10840	pp	O70161 (pp) Q71LX4	false
14131	10839	pp	Q9Z1B3 (pp) Q01097	false
14132	10838	pp	Q9Z1B3 (pp) P35438	false
14133	10837	pp	Q921G7 (pp) Q8BWT1	false
14134	10836	pp	Q921G7 (pp) Q61425	false
14135	10835	pp	Q921G7 (pp) Q8BMS1	false
14136	10834	pp	Q921G7 (pp) Q9D6J6	false
14137	10833	pp	Q921G7 (pp) Q99JY0	false
14138	10832	pp	Q921G7 (pp) Q9WUM5	false
14139	10831	pp	Q921G7 (pp) Q80U28	false
14140	10830	pp	Q921G7 (pp) Q9CQ62	false
14141	10829	pp	Q921G7 (pp) Q99LC5	false
14142	10828	pp	Q8BWT1 (pp) Q9D0K2	false
14143	10827	pp	Q8BWT1 (pp) Q9DBL1	false
14144	10826	pp	Q8BWT1 (pp) Q9EQ20	false
14145	10825	pp	Q8BWT1 (pp) Q99JY0	false
14146	10824	pp	Q8BWT1 (pp) Q8BMS1	false
14147	10823	pp	Q8BWT1 (pp) Q9WUM5	false
14148	10822	pp	Q8BWT1 (pp) O08756	false
14149	10821	pp	Q8BWT1 (pp) Q91ZA3	false
14150	10820	pp	Q9CQA3 (pp) Q9D0M3	false
14151	10819	pp	Q9CQA3 (pp) Q9CZ13	false
14152	10818	pp	Q9CQA3 (pp) Q06185	false
14153	10817	pp	Q9CQA3 (pp) Q8K3J1	false
14154	10816	pp	Q9CQA3 (pp) Q9Z2I9	false
14155	10815	pp	Q9CQA3 (pp) Q9Z1P6	false
14156	10814	pp	Q9CQA3 (pp) Q9DCS9	false
14157	10813	pp	Q9CQA3 (pp) Q9CQZ6	false
14158	10812	pp	Q9CQA3 (pp) Q9D2G2	false
14159	10811	pp	Q9CQA3 (pp) Q9DCJ5	false
14160	10810	pp	Q9CQA3 (pp) P54071	false
14161	10809	pp	Q9CQA3 (pp) Q99KI0	false
14162	10808	pp	Q9CQA3 (pp) Q9CQ62	false
14163	10807	pp	Q9CQA3 (pp) Q9DB20	false
14164	10806	pp	Q9CQA3 (pp) Q9D855	false
14165	10805	pp	Q9CQA3 (pp) P97807	false
14166	10804	pp	Q9CQA3 (pp) P70404	false
14167	10803	pp	Q9CQA3 (pp) Q9CPQ1	false
14168	10802	pp	Q9CQA3 (pp) Q9CQH3	false
14169	10801	pp	Q9CQA3 (pp) P52503	false
14170	10800	pp	Q9CQA3 (pp) Q9DC69	false
14171	10799	pp	Q9CQA3 (pp) Q9WUM5	false
14172	10798	pp	Q9CQA3 (pp) Q9D6J5	false
14173	10797	pp	Q9CQA3 (pp) P56391	false
14174	10796	pp	Q9CQA3 (pp) Q9DB77	false
14175	10795	pp	Q9CQA3 (pp) Q9CQ75	false
14176	10794	pp	Q9CQA3 (pp) Q8K2B3	false
14177	10793	pp	Q9CQA3 (pp) Q9CR68	false
14178	10792	pp	Q9CQA3 (pp) Q91VD9	false
14179	10791	pp	Q9CQA3 (pp) Q9D6J6	false
14180	10790	pp	Q9CQA3 (pp) P20108	false
14181	10789	pp	Q9CQA3 (pp) Q9CQZ5	false
14182	10788	pp	Q9CQA3 (pp) Q99LC5	false
14183	10787	pp	Q9CQA3 (pp) Q9CQQ7	false
14184	10786	pp	Q9CQA3 (pp) Q7TMF3	false
14185	10785	pp	Q9CQA3 (pp) Q03265	false
14186	10784	pp	Q9CQA3 (pp) Q91VR2	false
14187	10783	pp	Q9CQA3 (pp) Q61425	false
14188	10782	pp	Q9CQA3 (pp) Q64521	false
14189	10781	pp	Q9CQA3 (pp) Q8VEM8	false
14190	10780	pp	Q9CQA3 (pp) Q91YT0	false
14191	10779	pp	Q9CQA3 (pp) Q9DCX2	false
14192	10778	pp	Q9CQA3 (pp) P56480	false
14193	10777	pp	Q9CQA3 (pp) P97450	false
14194	10776	pp	Q9CQA3 (pp) Q9DCD0	false
14195	10775	pp	Q9CQA3 (pp) Q9CPP6	false
14196	10774	pp	Q9CQA3 (pp) Q91WD5	false
14197	10773	pp	Q9CQA3 (pp) P19783	false
14198	10772	pp	Q9CQA3 (pp) Q9D6R2	false
14199	10771	pp	Q9CQA3 (pp) Q9DC70	false
14200	10770	pp	Q9CQA3 (pp) Q9CQ69	false
14201	10769	pp	Q9CQA3 (pp) P17751	false
14202	10768	pp	Q9CQA3 (pp) P43024	false
14203	10767	pp	Q9CQA3 (pp) O09111	false
14204	10766	pp	Q9CQA3 (pp) Q9D3D9	false
14205	10765	pp	Q9CQA3 (pp) Q99LX0	false
14206	10764	pp	Q9CQA3 (pp) P19536	false
14207	10763	pp	Q9CQA3 (pp) P99029	false
14208	10762	pp	Q9CQA3 (pp) Q9ERS2	false
14209	10761	pp	Q9CQA3 (pp) Q9CQJ8	false
14210	10760	pp	Q9CQA3 (pp) P08249	false
14211	10759	pp	Q9CQA3 (pp) Q60597	false
14212	10758	pp	P12787 (pp) Q9CR68	false
14213	10757	pp	P12787 (pp) P52503	false
14214	10756	pp	P12787 (pp) Q9D6R2	false
14215	10755	pp	P12787 (pp) Q9DCS9	false
14216	10754	pp	P12787 (pp) Q99LC5	false
14217	10753	pp	P12787 (pp) Q9D3D9	false
14218	10752	pp	P12787 (pp) Q8K3J1	false
14219	10751	pp	P12787 (pp) Q7TMF3	false
14220	10750	pp	P12787 (pp) Q8VEM8	false
14221	10749	pp	P12787 (pp) P17665	false
14222	10748	pp	P12787 (pp) Q9DC69	false
14223	10747	pp	P12787 (pp) Q9DCW4	false
14224	10746	pp	P12787 (pp) P97450	false
14225	10745	pp	P12787 (pp) Q9DCT2	false
14226	10744	pp	P12787 (pp) P56391	false
14227	10743	pp	P12787 (pp) Q9ERS2	false
14228	10742	pp	P12787 (pp) P19783	false
14229	10741	pp	P12787 (pp) Q9CQQ7	false
14230	10740	pp	P12787 (pp) Q9D6J6	false
14231	10739	pp	P12787 (pp) Q9DB20	false
14232	10738	pp	P12787 (pp) P00405	false
14233	10737	pp	P12787 (pp) Q9CQZ5	false
14234	10736	pp	P12787 (pp) Q9DCJ5	false
14235	10735	pp	P12787 (pp) Q9D0M3	false
14236	10734	pp	P12787 (pp) Q9D6J5	false
14237	10733	pp	P12787 (pp) Q9CQ69	false
14238	10732	pp	P12787 (pp) Q9CQJ8	false
14239	10731	pp	P12787 (pp) Q9CPQ1	false
14240	10730	pp	P12787 (pp) Q9DC70	false
14241	10729	pp	P12787 (pp) Q9CQ54	false
14242	10728	pp	P12787 (pp) Q91VR2	false
14243	10727	pp	P12787 (pp) Q99LC3	false
14244	10726	pp	P12787 (pp) Q9DCX2	false
14245	10725	pp	P12787 (pp) Q9CQH3	false
14246	10724	pp	P12787 (pp) P09671	false
14247	10723	pp	P12787 (pp) Q03265	false
14248	10722	pp	P12787 (pp) Q9D855	false
14249	10721	pp	P12787 (pp) Q9CQA3	false
14250	10720	pp	P12787 (pp) Q9DB77	false
14251	10719	pp	P12787 (pp) P43024	false
14252	10718	pp	P12787 (pp) P19536	false
14253	10717	pp	P12787 (pp) Q9CQZ6	false
14254	10716	pp	P12787 (pp) Q9CXZ1	false
14255	10715	pp	P12787 (pp) Q06185	false
14256	10714	pp	P12787 (pp) P56480	false
14257	10713	pp	Q61425 (pp) Q99LC5	false
14258	10712	pp	Q61425 (pp) Q9WUM5	false
14259	10711	pp	Q61425 (pp) Q9DBL1	false
14260	10710	pp	Q61425 (pp) Q9D0K2	false
14261	10709	pp	Q61425 (pp) Q9CZS1	false
14262	10708	pp	Q61425 (pp) Q8BMS1	false
14263	10707	pp	Q61425 (pp) Q9CQ62	false
14264	10706	pp	Q61425 (pp) Q8BWT1	false
14265	10705	pp	Q61425 (pp) Q99JY0	false
14266	10704	pp	Q61425 (pp) O08756	false
14267	10703	pp	Q61425 (pp) P47738	false
14268	10702	pp	Q61425 (pp) Q8QZT1	false
14269	10701	pp	Q61425 (pp) Q9EQ20	false
14270	10700	pp	Q99LC5 (pp) O09111	false
14271	10699	pp	Q99LC5 (pp) P50544	false
14272	10698	pp	Q99LC5 (pp) Q9D6J6	false
14273	10697	pp	Q99LC5 (pp) Q9DCJ5	false
14274	10696	pp	Q99LC5 (pp) Q6PB66	false
14275	10695	pp	Q99LC5 (pp) Q91ZJ5	false
14276	10694	pp	Q99LC5 (pp) Q9CQH3	false
14277	10693	pp	Q99LC5 (pp) Q80U28	false
14278	10692	pp	Q99LC5 (pp) Q91VR2	false
14279	10691	pp	Q99LC5 (pp) Q9DBL1	false
14280	10690	pp	Q99LC5 (pp) Q99JY0	false
14281	10689	pp	Q99LC5 (pp) O08756	false
14282	10688	pp	Q99LC5 (pp) Q91YT0	false
14283	10687	pp	Q99LC5 (pp) Q9Z0X1	false
14284	10686	pp	Q99LC5 (pp) Q8BWT1	false
14285	10685	pp	Q99LC5 (pp) Q9WUM5	false
14286	10684	pp	Q99LC5 (pp) Q9CR68	false
14287	10683	pp	Q99LC5 (pp) O88441	false
14288	10682	pp	Q99LC5 (pp) Q9DC69	false
14289	10681	pp	Q8BGH2 (pp) Q99LX0	false
14290	10680	pp	Q8BGH2 (pp) Q8BH95	false
14291	10679	pp	Q8BGH2 (pp) Q8CAQ8	false
14292	10678	pp	Q8BGH2 (pp) Q9CZ13	false
14293	10677	pp	Q8BGH2 (pp) Q9DC69	false
14294	10676	pp	Q8BGH2 (pp) Q9QYA2	false
14295	10675	pp	Q8BGH2 (pp) O88441	false
14296	10674	pp	Q8BGH2 (pp) P97807	false
14297	10673	pp	Q8BGH2 (pp) Q9CRB9	false
14298	10672	pp	Q8BGH2 (pp) Q9DCJ5	false
14299	10671	pp	Q8BGH2 (pp) Q9WUM5	false
14300	10670	pp	Q8BGH2 (pp) Q91YT0	false
14301	10669	pp	Q99LX0 (pp) Q62277	false
14302	10668	pp	Q99LX0 (pp) O09111	false
14303	10667	pp	Q99LX0 (pp) Q9D6J6	false
14304	10666	pp	Q99LX0 (pp) O55042	false
14305	10665	pp	Q99LX0 (pp) O08756	false
14306	10664	pp	Q99LX0 (pp) Q91VR2	false
14307	10663	pp	Q99LX0 (pp) Q9CQH3	false
14308	10662	pp	P62331 (pp) O70161	false
14309	10661	pp	Q8K1Z0 (pp) Q9DCJ5	false
14310	10660	pp	Q8K1Z0 (pp) Q9WUM5	false
14311	10659	pp	Q8K1Z0 (pp) Q9D6J6	false
14312	10658	pp	Q8K1Z0 (pp) Q9ERS2	false
14313	10657	pp	P11499 (pp) P62259	false
14314	10656	pp	P11499 (pp) Q60864	false
14315	10655	pp	P11499 (pp) P63038	false
14316	10654	pp	P11499 (pp) P63037	false
14317	10653	pp	P11499 (pp) P60710	false
14318	10652	pp	P11499 (pp) Q9CR16	false
14319	10651	pp	P05064 (pp) P17710	false
14320	10650	pp	P05064 (pp) Q9WUA3	false
14321	10649	pp	P05064 (pp) P17182	false
14322	10648	pp	P05064 (pp) Q61735	false
14323	10647	pp	P05064 (pp) P05063	false
14324	10646	pp	P17710 (pp) Q9WUA3	false
14325	10645	pp	P48320 (pp) P61922	false
14326	10644	pp	P48320 (pp) P15105	false
14327	10643	pp	P61922 (pp) Q9DBF1	false
14328	10642	pp	P61922 (pp) P15105	false
14329	10641	pp	P61922 (pp) Q9EQ20	false
14330	10640	pp	P12023 (pp) P46460	false
14331	10639	pp	P12023 (pp) Q9WV18	false
14332	10638	pp	P12023 (pp) P04925	false
14333	10637	pp	P12023 (pp) P63044	false
14334	10636	pp	P12023 (pp) P62823	false
14335	10635	pp	P12023 (pp) Q9CZT8	false
14336	10634	pp	P12023 (pp) P06837	false
14337	10633	pp	P12023 (pp) P63011	false
14338	10632	pp	P12023 (pp) O35526	false
14339	10631	pp	P12023 (pp) O08756	false
14340	10630	pp	P12023 (pp) P68254	false
14341	10629	pp	P12023 (pp) Q8VDN2	false
14342	10628	pp	P12023 (pp) Q9JHU4	false
14343	10627	pp	P12023 (pp) Q62277	false
14344	10626	pp	P12023 (pp) Q9Z1G3	false
14345	10625	pp	P12023 (pp) Q810U3	false
14346	10624	pp	P12023 (pp) P62259	false
14347	10623	pp	P12023 (pp) Q9D6F9	false
14348	10622	pp	P12023 (pp) Q61548	false
14349	10621	pp	P12023 (pp) Q60932	false
14350	10620	pp	P12023 (pp) P35564	false
14351	10619	pp	P12023 (pp) P56564	false
14352	10618	pp	P12023 (pp) Q64332	false
14353	10617	pp	P12023 (pp) O88935	false
14354	10616	pp	P12023 (pp) P07901	false
14355	10615	pp	P12023 (pp) P61982	false
14356	10614	pp	P12023 (pp) O88737	false
14357	10613	pp	P12023 (pp) P13595	false
14358	10612	pp	P12023 (pp) Q9JIS5	false
14359	10611	pp	P12023 (pp) P63101	false
14360	10610	pp	P12023 (pp) P60710	false
14361	10609	pp	P12023 (pp) P68510	false
14362	10608	pp	P12023 (pp) O08599	false
14363	10607	pp	P12023 (pp) P39053	false
14364	10606	pp	P12023 (pp) P12960	false
14365	10605	pp	P12023 (pp) P08551	false
14366	10604	pp	P12023 (pp) P62821	false
14367	10603	pp	P12023 (pp) P46096	false
14368	10602	pp	P12023 (pp) P57780	false
14369	10601	pp	P12023 (pp) Q91ZZ3	false
14370	10600	pp	P12023 (pp) P28652	false
14371	10599	pp	P12023 (pp) O54991	false
14372	10598	pp	P12023 (pp) Q812A2	false
14373	10597	pp	P12023 (pp) P46660	false
14374	10596	pp	P12023 (pp) P60879	false
14375	10595	pp	P12023 (pp) O55042	false
14376	10594	pp	P12023 (pp) P97300	false
14377	10593	pp	P12023 (pp) Q62420	false
14378	10592	pp	P12023 (pp) P01831	false
14379	10591	pp	P12023 (pp) Q68FD5	false
14380	10590	pp	P12023 (pp) Q9Z1G4	false
14381	10589	pp	P12023 (pp) Q9CQV8	false
14382	10588	pp	P12023 (pp) Q61316	false
14383	10587	pp	P12023 (pp) P11627	false
14384	10586	pp	P12023 (pp) P63017	false
14385	10585	pp	P12023 (pp) P61264	false
14386	10584	pp	P62814 (pp) P51863	false
14387	10583	pp	P62814 (pp) P50516	false
14388	10582	pp	P62814 (pp) Q8BVE3	false
14389	10581	pp	P62814 (pp) P57746	false
14390	10580	pp	P62814 (pp) Q9DC69	false
14391	10579	pp	P62814 (pp) Q9Z1G3	false
14392	10578	pp	P62814 (pp) P63082	false
14393	10577	pp	P62814 (pp) Q91VM9	false
14394	10576	pp	P62814 (pp) P50518	false
14395	10575	pp	P62814 (pp) Q9WTT4	false
14396	10574	pp	P62814 (pp) Q9Z1G4	false
14397	10573	pp	Q9WV92 (pp) Q8R5M8	false
14398	10572	pp	Q9WV92 (pp) P12023	false
14399	10571	pp	Q8R5M8 (pp) O70589	false
14400	10570	pp	O35526 (pp) Q62442	false
14401	10569	pp	O35526 (pp) P63040	false
14402	10568	pp	O35526 (pp) P60879	false
14403	10567	pp	O35526 (pp) O08599	false
14404	10566	pp	Q9WV18 (pp) Q80T41	false
14405	10565	pp	P56391 (pp) O09111	false
14406	10564	pp	P56391 (pp) Q9D3D9	false
14407	10563	pp	P56391 (pp) Q9ERS2	false
14408	10562	pp	P56391 (pp) P00405	false
14409	10561	pp	P56391 (pp) P17665	false
14410	10560	pp	P56391 (pp) Q9DCX2	false
14411	10559	pp	Q9D172 (pp) Q9CQH3	false
14412	10558	pp	Q9D172 (pp) P97807	false
14413	10557	pp	Q9D172 (pp) Q91YT0	false
14414	10556	pp	Q9D172 (pp) Q9CQZ5	false
14415	10555	pp	Q9D172 (pp) Q9DCT2	false
14416	10554	pp	Q9D172 (pp) Q9CZ13	false
14417	10553	pp	Q9D172 (pp) Q91WD5	false
14418	10552	pp	Q9D172 (pp) Q8BH95	false
14419	10551	pp	Q9D172 (pp) Q9DCJ5	false
14420	10550	pp	Q9D172 (pp) P42125	false
14421	10549	pp	Q9D172 (pp) Q9DC70	false
14422	10548	pp	Q62442 (pp) P61264	false
14423	10547	pp	P26443 (pp) Q91Z53	false
14424	10546	pp	P26443 (pp) Q61425	false
14425	10545	pp	P26443 (pp) P97807	false
14426	10544	pp	P26443 (pp) P05202	false
14427	10543	pp	P26443 (pp) P15105	false
14428	10542	pp	P26443 (pp) Q9D6R2	false
14429	10541	pp	P26443 (pp) Q8BH04	false
14430	10540	pp	P26443 (pp) Q8CHT0	false
14431	10539	pp	P26443 (pp) P29758	false
14432	10538	pp	P26443 (pp) P05063	false
14433	10537	pp	P26443 (pp) Q05920	false
14434	10536	pp	P26443 (pp) P61922	false
14435	10535	pp	P26443 (pp) P17751	false
14436	10534	pp	P26443 (pp) Q60597	false
14437	10533	pp	P26443 (pp) P70404	false
14438	10532	pp	P26443 (pp) P56480	false
14439	10531	pp	P26443 (pp) P63038	false
14440	10530	pp	P26443 (pp) Q99KI0	false
14441	10529	pp	P26443 (pp) P48320	false
14442	10528	pp	P26443 (pp) P54071	false
14443	10527	pp	P26443 (pp) Q9DCD0	false
14444	10526	pp	Q91Z53 (pp) P45376	false
14445	10525	pp	Q99KJ8 (pp) O08788	false
14446	10524	pp	Q99KJ8 (pp) P28667	false
14447	10523	pp	O08788 (pp) O35465	false
14448	10522	pp	Q99KI0 (pp) Q9D2G2	false
14449	10521	pp	Q99KI0 (pp) Q62351	false
14450	10520	pp	Q99KI0 (pp) Q91VR2	false
14451	10519	pp	Q99KI0 (pp) Q9CQH3	false
14452	10518	pp	Q99KI0 (pp) P17751	false
14453	10517	pp	Q99KI0 (pp) Q9DC69	false
14454	10516	pp	Q99KI0 (pp) Q9DB77	false
14455	10515	pp	Q99KI0 (pp) Q9CZ13	false
14456	10514	pp	Q99KI0 (pp) P63038	false
14457	10513	pp	Q99KI0 (pp) P54071	false
14458	10512	pp	Q99KI0 (pp) P47857	false
14459	10511	pp	Q99KI0 (pp) P52480	false
14460	10510	pp	Q99KI0 (pp) Q05920	false
14461	10509	pp	Q99KI0 (pp) Q9D3D9	false
14462	10508	pp	Q99KI0 (pp) P70404	false
14463	10507	pp	Q99KI0 (pp) O09111	false
14464	10506	pp	Q99KI0 (pp) Q9D6R2	false
14465	10505	pp	Q99KI0 (pp) Q9ERS2	false
14466	10504	pp	Q99KI0 (pp) Q91YT0	false
14467	10503	pp	Q99KI0 (pp) Q9CR68	false
14468	10502	pp	Q99KI0 (pp) P06745	false
14469	10501	pp	Q99KI0 (pp) Q9DB20	false
14470	10500	pp	Q99KI0 (pp) Q9DCJ5	false
14471	10499	pp	Q99KI0 (pp) Q9D0M3	false
14472	10498	pp	Q99KI0 (pp) Q9CPP6	false
14473	10497	pp	Q99KI0 (pp) Q8K1M6	false
14474	10496	pp	Q99KI0 (pp) P68510	false
14475	10495	pp	Q99KI0 (pp) Q9WUM5	false
14476	10494	pp	Q99KI0 (pp) Q60597	false
14477	10493	pp	Q99KI0 (pp) Q99LX0	false
14478	10492	pp	Q99KI0 (pp) P35486	false
14479	10491	pp	Q99KI0 (pp) Q9Z1J3	false
14480	10490	pp	Q99KI0 (pp) Q03265	false
14481	10489	pp	Q99KI0 (pp) Q01097	false
14482	10488	pp	Q99KI0 (pp) P97807	false
14483	10487	pp	Q99KI0 (pp) P56480	false
14484	10486	pp	Q99KI0 (pp) P05064	false
14485	10485	pp	Q99KI0 (pp) Q9D6J6	false
14486	10484	pp	Q9ERS2 (pp) P50516	false
14487	10483	pp	Q9ERS2 (pp) Q91VR2	false
14488	10482	pp	Q9ERS2 (pp) O09111	false
14489	10481	pp	Q9ERS2 (pp) Q9D6J6	false
14490	10480	pp	Q9ERS2 (pp) Q9CQH3	false
14491	10479	pp	P97807 (pp) Q06185	false
14492	10478	pp	P97807 (pp) P54071	false
14493	10477	pp	P97807 (pp) Q99LX0	false
14494	10476	pp	P97807 (pp) Q9D2G2	false
14495	10475	pp	P97807 (pp) Q9D6R2	false
14496	10474	pp	P97807 (pp) Q9CQQ7	false
14497	10473	pp	P97807 (pp) P48771	false
14498	10472	pp	P97807 (pp) O08756	false
14499	10471	pp	P97807 (pp) Q9DCD0	false
14500	10470	pp	P97807 (pp) Q9DCJ5	false
14501	10469	pp	P97807 (pp) Q9DCS9	false
14502	10468	pp	P97807 (pp) Q99LC5	false
14503	10467	pp	P97807 (pp) Q9DC69	false
14504	10466	pp	P97807 (pp) Q60597	false
14505	10465	pp	P97807 (pp) Q05920	false
14506	10464	pp	P97807 (pp) Q91VR2	false
14507	10463	pp	P97807 (pp) Q91YT0	false
14508	10462	pp	P97807 (pp) Q8K3J1	false
14509	10461	pp	P97807 (pp) P06151	false
14510	10460	pp	P97807 (pp) Q9WUM5	false
14511	10459	pp	P97807 (pp) Q9D6J6	false
14512	10458	pp	P97807 (pp) P06745	false
14513	10457	pp	P97807 (pp) Q8BMF4	false
14514	10456	pp	P97807 (pp) Q61425	false
14515	10455	pp	P97807 (pp) Q9CR68	false
14516	10454	pp	P97807 (pp) Q921G7	false
14517	10453	pp	P97807 (pp) Q9CQH3	false
14518	10452	pp	P97807 (pp) Q60931	false
14519	10451	pp	P97807 (pp) P05202	false
14520	10450	pp	Q6PHZ2 (pp) P60710	false
14521	10449	pp	Q6PHZ2 (pp) P99024	false
14522	10448	pp	Q6PHZ2 (pp) P35436	false
14523	10447	pp	Q6PHZ2 (pp) P63101	false
14524	10446	pp	Q6PHZ2 (pp) P68369	false
14525	10445	pp	P60710 (pp) Q9R0Q6	false
14526	10444	pp	P60710 (pp) P59999	false
14527	10443	pp	P60710 (pp) Q9D898	false
14528	10442	pp	P60710 (pp) P35438	false
14529	10441	pp	P60710 (pp) P16054	false
14530	10440	pp	P60710 (pp) Q9CPW4	false
14531	10439	pp	P60710 (pp) Q9JM76	false
14532	10438	pp	P60710 (pp) O70589	false
14533	10437	pp	Q02248 (pp) P05480	false
14534	10436	pp	Q02248 (pp) Q61301	false
14535	10435	pp	Q02248 (pp) P35438	false
14536	10434	pp	Q02248 (pp) P39688	false
14537	10433	pp	Q02248 (pp) P68510	false
14538	10432	pp	Q02248 (pp) Q68FH0	false
14539	10431	pp	Q02248 (pp) O88712	false
14540	10430	pp	Q02248 (pp) Q01097	false
14541	10429	pp	Q02248 (pp) P63001	false
14542	10428	pp	P05480 (pp) P35436	false
14543	10427	pp	P05480 (pp) P35438	false
14544	10426	pp	P05480 (pp) P39053	false
14545	10425	pp	P05480 (pp) P30999	false
14546	10424	pp	P05480 (pp) P23242	false
14547	10423	pp	P51881 (pp) P62259	false
14548	10422	pp	P51881 (pp) P16054	false
14549	10421	pp	Q91WD5 (pp) Q8K2B3	false
14550	10420	pp	Q91WD5 (pp) Q9CQZ6	false
14551	10419	pp	Q91WD5 (pp) Q99MN9	false
14552	10418	pp	Q91WD5 (pp) Q9DCJ5	false
14553	10417	pp	Q91WD5 (pp) P08249	false
14554	10416	pp	Q91WD5 (pp) P70404	false
14555	10415	pp	Q91WD5 (pp) Q8VEM8	false
14556	10414	pp	Q91WD5 (pp) Q9D0M3	false
14557	10413	pp	Q91WD5 (pp) Q99KI0	false
14558	10412	pp	Q91WD5 (pp) Q99JY0	false
14559	10411	pp	Q91WD5 (pp) Q91VR2	false
14560	10410	pp	Q91WD5 (pp) Q9CQ69	false
14561	10409	pp	Q91WD5 (pp) Q9D855	false
14562	10408	pp	Q91WD5 (pp) Q9CQH3	false
14563	10407	pp	Q91WD5 (pp) Q9DC70	false
14564	10406	pp	Q91WD5 (pp) P97807	false
14565	10405	pp	Q91WD5 (pp) Q9CQQ7	false
14566	10404	pp	Q91WD5 (pp) Q99LX0	false
14567	10403	pp	Q91WD5 (pp) Q99LC3	false
14568	10402	pp	Q91WD5 (pp) Q9CQZ5	false
14569	10401	pp	Q91WD5 (pp) P97450	false
14570	10400	pp	Q91WD5 (pp) Q9CQC7	false
14571	10399	pp	Q91WD5 (pp) Q9CQJ8	false
14572	10398	pp	Q91WD5 (pp) Q9DB77	false
14573	10397	pp	Q91WD5 (pp) Q9CXZ1	false
14574	10396	pp	Q91WD5 (pp) Q9D6J6	false
14575	10395	pp	Q91WD5 (pp) Q9DCS9	false
14576	10394	pp	Q91WD5 (pp) Q9CR68	false
14577	10393	pp	Q91WD5 (pp) Q3ULD5	false
14578	10392	pp	Q91WD5 (pp) P20108	false
14579	10391	pp	Q91WD5 (pp) Q8BGH2	false
14580	10390	pp	Q91WD5 (pp) Q03265	false
14581	10389	pp	Q91WD5 (pp) Q7TMF3	false
14582	10388	pp	Q91WD5 (pp) Q8CAQ8	false
14583	10387	pp	Q91WD5 (pp) Q6PB66	false
14584	10386	pp	Q91WD5 (pp) P56480	false
14585	10385	pp	Q91WD5 (pp) Q8K3J1	false
14586	10384	pp	Q91WD5 (pp) Q9D6J5	false
14587	10383	pp	Q91WD5 (pp) Q9CQ75	false
14588	10382	pp	Q91WD5 (pp) Q9ERS2	false
14589	10381	pp	Q91WD5 (pp) Q8K1Z0	false
14590	10380	pp	Q91WD5 (pp) P52503	false
14591	10379	pp	Q91WD5 (pp) P17751	false
14592	10378	pp	Q91WD5 (pp) Q8BH95	false
14593	10377	pp	Q91WD5 (pp) Q99LC5	false
14594	10376	pp	Q91WD5 (pp) Q9CZ13	false
14595	10375	pp	Q91WD5 (pp) Q9DB20	false
14596	10374	pp	Q91WD5 (pp) P09411	false
14597	10373	pp	Q91WD5 (pp) Q91VD9	false
14598	10372	pp	Q91WD5 (pp) P35486	false
14599	10371	pp	Q91WD5 (pp) Q9WUM5	false
14600	10370	pp	Q91WD5 (pp) Q9DC69	false
14601	10369	pp	Q91WD5 (pp) Q91YT0	false
14602	10368	pp	Q91WD5 (pp) Q99LY9	false
14603	10367	pp	Q91WD5 (pp) Q9CPP6	false
14604	10366	pp	Q8K2B3 (pp) P97807	false
14605	10365	pp	Q8K2B3 (pp) Q8JZQ2	false
14606	10364	pp	Q8K2B3 (pp) Q8VEM8	false
14607	10363	pp	Q8K2B3 (pp) Q9D0M3	false
14608	10362	pp	Q8K2B3 (pp) Q91VR2	false
14609	10361	pp	Q8K2B3 (pp) Q9D2G2	false
14610	10360	pp	Q8K2B3 (pp) Q9Z0X1	false
14611	10359	pp	Q8K2B3 (pp) Q9D051	false
14612	10358	pp	Q8K2B3 (pp) Q03265	false
14613	10357	pp	Q8K2B3 (pp) P52196	false
14614	10356	pp	Q8K2B3 (pp) Q9CPP6	false
14615	10355	pp	Q8K2B3 (pp) Q9CQQ7	false
14616	10354	pp	Q8K2B3 (pp) Q99KI0	false
14617	10353	pp	Q8K2B3 (pp) P09411	false
14618	10352	pp	Q8K2B3 (pp) Q91YT0	false
14619	10351	pp	Q8K2B3 (pp) Q9Z2I9	false
14620	10350	pp	Q8K2B3 (pp) P00493	false
14621	10349	pp	Q8K2B3 (pp) Q60597	false
14622	10348	pp	Q8K2B3 (pp) P56480	false
14623	10347	pp	Q8K2B3 (pp) Q9WUM5	false
14624	10346	pp	Q8K2B3 (pp) Q99LC5	false
14625	10345	pp	Q8K2B3 (pp) Q9CR68	false
14626	10344	pp	Q8K2B3 (pp) Q9CZ13	false
14627	10343	pp	Q8K2B3 (pp) Q9DC69	false
14628	10342	pp	Q8K2B3 (pp) Q9D6J6	false
14629	10341	pp	Q8K2B3 (pp) Q9DB77	false
14630	10340	pp	Q8K2B3 (pp) P35486	false
14631	10339	pp	Q8K2B3 (pp) Q8K3J1	false
14632	10338	pp	Q8K2B3 (pp) P63038	false
14633	10337	pp	Q8K2B3 (pp) Q9D6R2	false
14634	10336	pp	Q8K2B3 (pp) Q91VD9	false
14635	10335	pp	Q8K2B3 (pp) P17751	false
14636	10334	pp	Q8K2B3 (pp) P58281	false
14637	10333	pp	Q8K2B3 (pp) Q99JY0	false
14638	10332	pp	P68369 (pp) P39053	false
14639	10331	pp	P68369 (pp) P27546	false
14640	10330	pp	P68369 (pp) P63101	false
14641	10329	pp	P68369 (pp) P35438	false
14642	10328	pp	P68369 (pp) P60879	false
14643	10327	pp	Q8VEM8 (pp) Q9D6J6	false
14644	10326	pp	Q8VEM8 (pp) Q9CQH3	false
14645	10325	pp	Q8VEM8 (pp) Q9CQQ7	false
14646	10324	pp	Q8VEM8 (pp) Q9D3D9	false
14647	10323	pp	Q3ULD5 (pp) Q8R4N0	false
14648	10322	pp	Q3ULD5 (pp) Q99MN9	false
14649	10321	pp	Q3ULD5 (pp) Q9JHI5	false
14650	10320	pp	Q3ULD5 (pp) Q921G7	false
14651	10319	pp	Q3ULD5 (pp) Q8BMS1	false
14652	10318	pp	Q3ULD5 (pp) Q8BH95	false
14653	10317	pp	Q3ULD5 (pp) Q91ZA3	false
14654	10316	pp	Q3ULD5 (pp) Q99MR8	false
14655	10315	pp	Q3ULD5 (pp) Q9D0K2	false
14656	10314	pp	Q3ULD5 (pp) Q05920	false
14657	10313	pp	Q8R4N0 (pp) Q91ZA3	false
14658	10312	pp	Q8R4N0 (pp) Q99MR8	false
14659	10311	pp	Q8R4N0 (pp) P05480	false
14660	10310	pp	Q8R4N0 (pp) Q9WUM5	false
14661	10309	pp	Q8R4N0 (pp) Q99LC5	false
14662	10308	pp	P52503 (pp) Q9D6J6	false
14663	10307	pp	P52503 (pp) P48771	false
14664	10306	pp	P52503 (pp) Q9CQZ6	false
14665	10305	pp	P52503 (pp) Q91YT0	false
14666	10304	pp	P52503 (pp) Q9CZ13	false
14667	10303	pp	P52503 (pp) Q91VD9	false
14668	10302	pp	P52503 (pp) Q9CQZ5	false
14669	10301	pp	P52503 (pp) P42125	false
14670	10300	pp	P52503 (pp) P43024	false
14671	10299	pp	P52503 (pp) P62073	false
14672	10298	pp	P52503 (pp) Q9DC69	false
14673	10297	pp	P52503 (pp) Q8K3J1	false
14674	10296	pp	P52503 (pp) Q9CQQ7	false
14675	10295	pp	P52503 (pp) Q9CQJ8	false
14676	10294	pp	P52503 (pp) Q9CQH3	false
14677	10293	pp	P52503 (pp) Q9CR68	false
14678	10292	pp	P52503 (pp) P56391	false
14679	10291	pp	P52503 (pp) Q9DB20	false
14680	10290	pp	P52503 (pp) Q99LC3	false
14681	10289	pp	P52503 (pp) P97450	false
14682	10288	pp	P52503 (pp) Q99LX0	false
14683	10287	pp	P52503 (pp) Q9DCJ5	false
14684	10286	pp	P52503 (pp) Q9CXZ1	false
14685	10285	pp	P52503 (pp) Q9D0M3	false
14686	10284	pp	P52503 (pp) Q9CQC7	false
14687	10283	pp	P52503 (pp) Q9D6J5	false
14688	10282	pp	P52503 (pp) P99029	false
14689	10281	pp	P52503 (pp) Q9ERS2	false
14690	10280	pp	P52503 (pp) Q06185	false
14691	10279	pp	P52503 (pp) Q9CQ54	false
14692	10278	pp	P52503 (pp) P17665	false
14693	10277	pp	P52503 (pp) Q9CPP6	false
14694	10276	pp	P52503 (pp) Q99LY9	false
14695	10275	pp	P52503 (pp) Q9DCS9	false
14696	10274	pp	P52503 (pp) Q9D3D9	false
14697	10273	pp	P52503 (pp) O08756	false
14698	10272	pp	P52503 (pp) O09111	false
14699	10271	pp	P52503 (pp) Q9CQ69	false
14700	10270	pp	P52503 (pp) Q9Z1P6	false
14701	10269	pp	Q60631 (pp) Q62277	false
14702	10268	pp	Q60631 (pp) Q62420	false
14703	10267	pp	Q60631 (pp) P18052	false
14704	10266	pp	Q60631 (pp) P04925	false
14705	10265	pp	Q60631 (pp) P20444	false
14706	10264	pp	Q60631 (pp) P12023	false
14707	10263	pp	Q60631 (pp) O08585	false
14708	10262	pp	Q60631 (pp) P05480	false
14709	10261	pp	Q60631 (pp) Q8CHC4	false
14710	10260	pp	Q60631 (pp) P39053	false
14711	10259	pp	Q60631 (pp) Q68FD5	false
14712	10258	pp	Q62277 (pp) P60879	false
14713	10257	pp	Q62277 (pp) P62204	false
14714	10256	pp	Q62277 (pp) P46096	false
14715	10255	pp	Q62277 (pp) P63044	false
14716	10254	pp	Q62277 (pp) P01831	false
14717	10253	pp	Q62277 (pp) P43006	false
14718	10252	pp	P62073 (pp) P99029	false
14719	10251	pp	P62073 (pp) O08756	false
14720	10250	pp	P62073 (pp) Q9ERS2	false
14721	10249	pp	P62073 (pp) Q925I1	false
14722	10248	pp	P62073 (pp) Q9DCJ5	false
14723	10247	pp	P62073 (pp) P56391	false
14724	10246	pp	P62073 (pp) O35658	false
14725	10245	pp	P62073 (pp) Q9CR68	false
14726	10244	pp	P62073 (pp) Q9D3D9	false
14727	10243	pp	P62073 (pp) Q9DCS9	false
14728	10242	pp	P62073 (pp) P67778	false
14729	10241	pp	P62073 (pp) Q9D6J6	false
14730	10240	pp	P62073 (pp) Q9CQH3	false
14731	10239	pp	P99029 (pp) Q9D6J6	false
14732	10238	pp	Q9CQV8 (pp) P62259	false
14733	10237	pp	Q9CQV8 (pp) P63101	false
14734	10236	pp	Q9CQV8 (pp) P16054	false
14735	10235	pp	Q9CQV8 (pp) Q64010	false
14736	10234	pp	Q9CQV8 (pp) P10637	false
14737	10233	pp	Q9CQR4 (pp) Q9CQH3	false
14738	10232	pp	Q9CQR4 (pp) P97450	false
14739	10231	pp	Q9CQR4 (pp) Q9D6J6	false
14740	10230	pp	Q9CQR4 (pp) Q9DCD0	false
14741	10229	pp	Q9CQR4 (pp) Q9CQZ6	false
14742	10228	pp	Q9CQR4 (pp) Q9CQZ5	false
14743	10227	pp	Q9CQR4 (pp) Q9DCJ5	false
14744	10226	pp	Q9CQR4 (pp) Q99LC5	false
14745	10225	pp	Q9CQR4 (pp) Q61425	false
14746	10224	pp	P40142 (pp) P09411	false
14747	10223	pp	P40142 (pp) Q9DCD0	false
14748	10222	pp	P40142 (pp) P06745	false
14749	10221	pp	P40142 (pp) Q93092	false
14750	10220	pp	P40142 (pp) P16858	false
14751	10219	pp	P40142 (pp) Q60597	false
14752	10218	pp	P40142 (pp) P52480	false
14753	10217	pp	P40142 (pp) P17751	false
14754	10216	pp	P40142 (pp) P05064	false
14755	10215	pp	P40142 (pp) P06151	false
14756	10214	pp	P40142 (pp) P17182	false
14757	10213	pp	P40142 (pp) P35486	false
14758	10212	pp	P40142 (pp) Q9D0F9	false
14759	10211	pp	P40142 (pp) P05063	false
14760	10210	pp	P63213 (pp) P62874	false
14761	10209	pp	P63213 (pp) P18872	false
14762	10208	pp	P62874 (pp) P04925	false
14763	10207	pp	Q99KR7 (pp) O35658	false
14764	10206	pp	Q99KR7 (pp) P56480	false
14765	10205	pp	O35658 (pp) P40630	false
14766	10204	pp	O35658 (pp) Q9CQQ7	false
14767	10203	pp	Q7TMF3 (pp) Q9DCX2	false
14768	10202	pp	Q7TMF3 (pp) Q9CXZ1	false
14769	10201	pp	Q7TMF3 (pp) O09111	false
14770	10200	pp	Q7TMF3 (pp) Q9CR68	false
14771	10199	pp	Q7TMF3 (pp) Q9CQ54	false
14772	10198	pp	Q7TMF3 (pp) Q9DC69	false
14773	10197	pp	Q7TMF3 (pp) Q62425	false
14774	10196	pp	Q7TMF3 (pp) Q9D0M3	false
14775	10195	pp	Q7TMF3 (pp) P97450	false
14776	10194	pp	Q7TMF3 (pp) P52503	false
14777	10193	pp	Q7TMF3 (pp) Q9D855	false
14778	10192	pp	Q7TMF3 (pp) Q9DC70	false
14779	10191	pp	Q7TMF3 (pp) Q9DCS9	false
14780	10190	pp	Q7TMF3 (pp) Q9CQZ5	false
14781	10189	pp	Q7TMF3 (pp) Q9CQQ7	false
14782	10188	pp	Q7TMF3 (pp) Q9Z1P6	false
14783	10187	pp	Q7TMF3 (pp) Q9DCJ5	false
14784	10186	pp	Q7TMF3 (pp) Q9CQZ6	false
14785	10185	pp	Q7TMF3 (pp) Q3UIU2	false
14786	10184	pp	Q7TMF3 (pp) Q9ERS2	false
14787	10183	pp	Q7TMF3 (pp) Q9CQJ8	false
14788	10182	pp	Q7TMF3 (pp) Q9D6J5	false
14789	10181	pp	Q7TMF3 (pp) Q99LY9	false
14790	10180	pp	Q7TMF3 (pp) Q8K3J1	false
14791	10179	pp	Q7TMF3 (pp) Q9CQC7	false
14792	10178	pp	Q7TMF3 (pp) Q9CQH3	false
14793	10177	pp	Q7TMF3 (pp) Q9D3D9	false
14794	10176	pp	Q7TMF3 (pp) Q9D6J6	false
14795	10175	pp	Q7TMF3 (pp) Q9CQ69	false
14796	10174	pp	Q7TMF3 (pp) Q91YT0	false
14797	10173	pp	Q7TMF3 (pp) Q91VD9	false
14798	10172	pp	Q7TMF3 (pp) Q99LC3	false
14799	10171	pp	Q9DCX2 (pp) Q9ERS2	false
14800	10170	pp	Q9DCX2 (pp) Q99LX0	false
14801	10169	pp	Q9DCX2 (pp) Q91VR2	false
14802	10168	pp	Q9DCX2 (pp) Q9CQQ7	false
14803	10167	pp	Q9DCX2 (pp) Q9D6J6	false
14804	10166	pp	Q9DCX2 (pp) Q9CQH3	false
14805	10165	pp	Q9DCX2 (pp) Q9D3D9	false
14806	10164	pp	Q9DCX2 (pp) Q99LY9	false
14807	10163	pp	Q61735 (pp) P97797	false
14808	10162	pp	P50518 (pp) Q8BVE3	false
14809	10161	pp	P50518 (pp) Q9Z1G4	false
14810	10160	pp	P50518 (pp) P63082	false
14811	10159	pp	P50518 (pp) P57746	false
14812	10158	pp	P50518 (pp) Q9WTT4	false
14813	10157	pp	P50518 (pp) Q9Z1G3	false
[truncated: 1,395 more rows]
