# Supplementary material for: APP Is a Context-Sensitive Regulator of the Hippocampal Presynaptic Active Zone
Source: PLOS journal article supplement (doi:10.1371/journal.pcbi.1004832), 2016-04-19
Supplement: S6 (10.1371/journal.pcbi.1004832.s006) [file journal.pcbi.1004832.s006.cys › CytoscapeSession-2016_01_22-10_07/tables/cytables.xml]

<?xml version="1.0" encoding="UTF-8" standalone="yes"?>
<cyTables>
    <virtualColumns>
        <virtualColumn immutable="false" targetJoinKey="SUID" targetTable="12194-Localization/LOCAL_ATTRS-org.cytoscape.model.CyNetwork-Localization+default+network.cytable" sourceJoinKey="SUID" sourceTable="12178-Core+Network+Localization/SHARED_ATTRS-org.cytoscape.model.CyNetwork-12178+shared+network.cytable" sourceColumn="shared name" name="shared name"/>
        <virtualColumn immutable="false" targetJoinKey="SUID" targetTable="36-Basic+Network/LOCAL_ATTRS-org.cytoscape.model.CyEdge-36+default+edge.cytable" sourceJoinKey="SUID" sourceTable="36-Basic+Network/SHARED_ATTRS-org.cytoscape.model.CyEdge-36+shared+edge.cytable" sourceColumn="shared name" name="shared name"/>
        <virtualColumn immutable="false" targetJoinKey="SUID" targetTable="36-Basic+Network/LOCAL_ATTRS-org.cytoscape.model.CyEdge-36+default+edge.cytable" sourceJoinKey="SUID" sourceTable="36-Basic+Network/SHARED_ATTRS-org.cytoscape.model.CyEdge-36+shared+edge.cytable" sourceColumn="shared interaction" name="shared interaction"/>
        <virtualColumn immutable="false" targetJoinKey="SUID" targetTable="4077-Cytoskeleton+Subnetwork/LOCAL_ATTRS-org.cytoscape.model.CyNode-Cytoskeleton+Subnetwork+default+node.cytable" sourceJoinKey="SUID" sourceTable="36-Basic+Network/SHARED_ATTRS-org.cytoscape.model.CyNode-36+shared+node.cytable" sourceColumn="shared name" name="shared name"/>
        <virtualColumn immutable="false" targetJoinKey="SUID" targetTable="12178-Core+Network+Localization/LOCAL_ATTRS-org.cytoscape.model.CyNetwork-12178+default+network.cytable" sourceJoinKey="SUID" sourceTable="12178-Core+Network+Localization/SHARED_ATTRS-org.cytoscape.model.CyNetwork-12178+shared+network.cytable" sourceColumn="shared name" name="shared name"/>
        <virtualColumn immutable="false" targetJoinKey="SUID" targetTable="4105-Calcium+Homeostasis+Subnetwork/LOCAL_ATTRS-org.cytoscape.model.CyEdge-Calcium+Homeostasis+Subnetwork+default+edge.cytable" sourceJoinKey="SUID" sourceTable="36-Basic+Network/SHARED_ATTRS-org.cytoscape.model.CyEdge-36+shared+edge.cytable" sourceColumn="shared name" name="shared name"/>
        <virtualColumn immutable="false" targetJoinKey="SUID" targetTable="4105-Calcium+Homeostasis+Subnetwork/LOCAL_ATTRS-org.cytoscape.model.CyEdge-Calcium+Homeostasis+Subnetwork+default+edge.cytable" sourceJoinKey="SUID" sourceTable="36-Basic+Network/SHARED_ATTRS-org.cytoscape.model.CyEdge-36+shared+edge.cytable" sourceColumn="shared interaction" name="shared interaction"/>
        <virtualColumn immutable="false" targetJoinKey="SUID" targetTable="12194-Localization/LOCAL_ATTRS-org.cytoscape.model.CyNode-Localization+default+node.cytable" sourceJoinKey="SUID" sourceTable="12178-Core+Network+Localization/SHARED_ATTRS-org.cytoscape.model.CyNode-12178+shared+node.cytable" sourceColumn="shared name" name="shared name"/>
        <virtualColumn immutable="false" targetJoinKey="SUID" targetTable="8163-Communities/LOCAL_ATTRS-org.cytoscape.model.CyEdge-Communities+default+edge.cytable" sourceJoinKey="SUID" sourceTable="8147-Core+Network+Communities/SHARED_ATTRS-org.cytoscape.model.CyEdge-8147+shared+edge.cytable" sourceColumn="shared name" name="shared name"/>
        <virtualColumn immutable="false" targetJoinKey="SUID" targetTable="8163-Communities/LOCAL_ATTRS-org.cytoscape.model.CyEdge-Communities+default+edge.cytable" sourceJoinKey="SUID" sourceTable="8147-Core+Network+Communities/SHARED_ATTRS-org.cytoscape.model.CyEdge-8147+shared+edge.cytable" sourceColumn="shared interaction" name="shared interaction"/>
        <virtualColumn immutable="false" targetJoinKey="SUID" targetTable="52-52/LOCAL_ATTRS-org.cytoscape.model.CyNetwork-52+default+network.cytable" sourceJoinKey="SUID" sourceTable="36-Basic+Network/SHARED_ATTRS-org.cytoscape.model.CyNetwork-36+shared+network.cytable" sourceColumn="shared name" name="shared name"/>
        <virtualColumn immutable="false" targetJoinKey="SUID" targetTable="8163-Communities/LOCAL_ATTRS-org.cytoscape.model.CyNode-Communities+default+node.cytable" sourceJoinKey="SUID" sourceTable="8147-Core+Network+Communities/SHARED_ATTRS-org.cytoscape.model.CyNode-8147+shared+node.cytable" sourceColumn="shared name" name="shared name"/>
        <virtualColumn immutable="false" targetJoinKey="SUID" targetTable="62-Core+Network+PAZ/LOCAL_ATTRS-org.cytoscape.model.CyNetwork-Core+Network+PAZ+default+network.cytable" sourceJoinKey="SUID" sourceTable="36-Basic+Network/SHARED_ATTRS-org.cytoscape.model.CyNetwork-36+shared+network.cytable" sourceColumn="shared name" name="shared name"/>
        <virtualColumn immutable="false" targetJoinKey="SUID" targetTable="8147-Core+Network+Communities/LOCAL_ATTRS-org.cytoscape.model.CyNode-8147+default+node.cytable" sourceJoinKey="SUID" sourceTable="8147-Core+Network+Communities/SHARED_ATTRS-org.cytoscape.model.CyNode-8147+shared+node.cytable" sourceColumn="shared name" name="shared name"/>
        <virtualColumn immutable="false" targetJoinKey="SUID" targetTable="4077-Cytoskeleton+Subnetwork/LOCAL_ATTRS-org.cytoscape.model.CyEdge-Cytoskeleton+Subnetwork+default+edge.cytable" sourceJoinKey="SUID" sourceTable="36-Basic+Network/SHARED_ATTRS-org.cytoscape.model.CyEdge-36+shared+edge.cytable" sourceColumn="shared name" name="shared name"/>
        <virtualColumn immutable="false" targetJoinKey="SUID" targetTable="4077-Cytoskeleton+Subnetwork/LOCAL_ATTRS-org.cytoscape.model.CyEdge-Cytoskeleton+Subnetwork+default+edge.cytable" sourceJoinKey="SUID" sourceTable="36-Basic+Network/SHARED_ATTRS-org.cytoscape.model.CyEdge-36+shared+edge.cytable" sourceColumn="shared interaction" name="shared interaction"/>
        <virtualColumn immutable="false" targetJoinKey="SUID" targetTable="4095-Synaptic+Vesicle+Cycle+Subnetwork/LOCAL_ATTRS-org.cytoscape.model.CyNode-Synaptic+Vesicle+Cycle+Subnetwork+default+node.cytable" sourceJoinKey="SUID" sourceTable="36-Basic+Network/SHARED_ATTRS-org.cytoscape.model.CyNode-36+shared+node.cytable" sourceColumn="shared name" name="shared name"/>
        <virtualColumn immutable="false" targetJoinKey="SUID" targetTable="8147-Core+Network+Communities/LOCAL_ATTRS-org.cytoscape.model.CyEdge-8147+default+edge.cytable" sourceJoinKey="SUID" sourceTable="8147-Core+Network+Communities/SHARED_ATTRS-org.cytoscape.model.CyEdge-8147+shared+edge.cytable" sourceColumn="shared name" name="shared name"/>
        <virtualColumn immutable="false" targetJoinKey="SUID" targetTable="8147-Core+Network+Communities/LOCAL_ATTRS-org.cytoscape.model.CyEdge-8147+default+edge.cytable" sourceJoinKey="SUID" sourceTable="8147-Core+Network+Communities/SHARED_ATTRS-org.cytoscape.model.CyEdge-8147+shared+edge.cytable" sourceColumn="shared interaction" name="shared interaction"/>
        <virtualColumn immutable="false" targetJoinKey="SUID" targetTable="4116-Core+Network+Subcommunities/LOCAL_ATTRS-org.cytoscape.model.CyNetwork-4116+default+network.cytable" sourceJoinKey="SUID" sourceTable="4116-Core+Network+Subcommunities/SHARED_ATTRS-org.cytoscape.model.CyNetwork-4116+shared+network.cytable" sourceColumn="shared name" name="shared name"/>
        <virtualColumn immutable="false" targetJoinKey="SUID" targetTable="4105-Calcium+Homeostasis+Subnetwork/LOCAL_ATTRS-org.cytoscape.model.CyNetwork-Calcium+Homeostasis+Subnetwork+default+network.cytable" sourceJoinKey="SUID" sourceTable="36-Basic+Network/SHARED_ATTRS-org.cytoscape.model.CyNetwork-36+shared+network.cytable" sourceColumn="shared name" name="shared name"/>
        <virtualColumn immutable="false" targetJoinKey="SUID" targetTable="4105-Calcium+Homeostasis+Subnetwork/LOCAL_ATTRS-org.cytoscape.model.CyNode-Calcium+Homeostasis+Subnetwork+default+node.cytable" sourceJoinKey="SUID" sourceTable="36-Basic+Network/SHARED_ATTRS-org.cytoscape.model.CyNode-36+shared+node.cytable" sourceColumn="shared name" name="shared name"/>
        <virtualColumn immutable="false" targetJoinKey="SUID" targetTable="4095-Synaptic+Vesicle+Cycle+Subnetwork/LOCAL_ATTRS-org.cytoscape.model.CyNetwork-Synaptic+Vesicle+Cycle+Subnetwork+default+network.cytable" sourceJoinKey="SUID" sourceTable="36-Basic+Network/SHARED_ATTRS-org.cytoscape.model.CyNetwork-36+shared+network.cytable" sourceColumn="shared name" name="shared name"/>
        <virtualColumn immutable="false" targetJoinKey="SUID" targetTable="52-52/LOCAL_ATTRS-org.cytoscape.model.CyEdge-52+default+edge.cytable" sourceJoinKey="SUID" sourceTable="36-Basic+Network/SHARED_ATTRS-org.cytoscape.model.CyEdge-36+shared+edge.cytable" sourceColumn="shared name" name="shared name"/>
        <virtualColumn immutable="false" targetJoinKey="SUID" targetTable="52-52/LOCAL_ATTRS-org.cytoscape.model.CyEdge-52+default+edge.cytable" sourceJoinKey="SUID" sourceTable="36-Basic+Network/SHARED_ATTRS-org.cytoscape.model.CyEdge-36+shared+edge.cytable" sourceColumn="shared interaction" name="shared interaction"/>
        <virtualColumn immutable="false" targetJoinKey="SUID" targetTable="4116-Core+Network+Subcommunities/LOCAL_ATTRS-org.cytoscape.model.CyNode-4116+default+node.cytable" sourceJoinKey="SUID" sourceTable="4116-Core+Network+Subcommunities/SHARED_ATTRS-org.cytoscape.model.CyNode-4116+shared+node.cytable" sourceColumn="shared name" name="shared name"/>
        <virtualColumn immutable="false" targetJoinKey="SUID" targetTable="52-52/LOCAL_ATTRS-org.cytoscape.model.CyNode-52+default+node.cytable" sourceJoinKey="SUID" sourceTable="36-Basic+Network/SHARED_ATTRS-org.cytoscape.model.CyNode-36+shared+node.cytable" sourceColumn="shared name" name="shared name"/>
        <virtualColumn immutable="false" targetJoinKey="SUID" targetTable="8147-Core+Network+Communities/LOCAL_ATTRS-org.cytoscape.model.CyNetwork-8147+default+network.cytable" sourceJoinKey="SUID" sourceTable="8147-Core+Network+Communities/SHARED_ATTRS-org.cytoscape.model.CyNetwork-8147+shared+network.cytable" sourceColumn="shared name" name="shared name"/>
        <virtualColumn immutable="false" targetJoinKey="SUID" targetTable="4116-Core+Network+Subcommunities/LOCAL_ATTRS-org.cytoscape.model.CyEdge-4116+default+edge.cytable" sourceJoinKey="SUID" sourceTable="4116-Core+Network+Subcommunities/SHARED_ATTRS-org.cytoscape.model.CyEdge-4116+shared+edge.cytable" sourceColumn="shared name" name="shared name"/>
        <virtualColumn immutable="false" targetJoinKey="SUID" targetTable="4116-Core+Network+Subcommunities/LOCAL_ATTRS-org.cytoscape.model.CyEdge-4116+default+edge.cytable" sourceJoinKey="SUID" sourceTable="4116-Core+Network+Subcommunities/SHARED_ATTRS-org.cytoscape.model.CyEdge-4116+shared+edge.cytable" sourceColumn="shared interaction" name="shared interaction"/>
        <virtualColumn immutable="false" targetJoinKey="SUID" targetTable="62-Core+Network+PAZ/LOCAL_ATTRS-org.cytoscape.model.CyEdge-Core+Network+PAZ+default+edge.cytable" sourceJoinKey="SUID" sourceTable="36-Basic+Network/SHARED_ATTRS-org.cytoscape.model.CyEdge-36+shared+edge.cytable" sourceColumn="shared name" name="shared name"/>
        <virtualColumn immutable="false" targetJoinKey="SUID" targetTable="62-Core+Network+PAZ/LOCAL_ATTRS-org.cytoscape.model.CyEdge-Core+Network+PAZ+default+edge.cytable" sourceJoinKey="SUID" sourceTable="36-Basic+Network/SHARED_ATTRS-org.cytoscape.model.CyEdge-36+shared+edge.cytable" sourceColumn="shared interaction" name="shared interaction"/>
        <virtualColumn immutable="false" targetJoinKey="SUID" targetTable="36-Basic+Network/LOCAL_ATTRS-org.cytoscape.model.CyNetwork-36+default+network.cytable" sourceJoinKey="SUID" sourceTable="36-Basic+Network/SHARED_ATTRS-org.cytoscape.model.CyNetwork-36+shared+network.cytable" sourceColumn="shared name" name="shared name"/>
        <virtualColumn immutable="false" targetJoinKey="SUID" targetTable="4095-Synaptic+Vesicle+Cycle+Subnetwork/LOCAL_ATTRS-org.cytoscape.model.CyEdge-Synaptic+Vesicle+Cycle+Subnetwork+default+edge.cytable" sourceJoinKey="SUID" sourceTable="36-Basic+Network/SHARED_ATTRS-org.cytoscape.model.CyEdge-36+shared+edge.cytable" sourceColumn="shared name" name="shared name"/>
        <virtualColumn immutable="false" targetJoinKey="SUID" targetTable="4095-Synaptic+Vesicle+Cycle+Subnetwork/LOCAL_ATTRS-org.cytoscape.model.CyEdge-Synaptic+Vesicle+Cycle+Subnetwork+default+edge.cytable" sourceJoinKey="SUID" sourceTable="36-Basic+Network/SHARED_ATTRS-org.cytoscape.model.CyEdge-36+shared+edge.cytable" sourceColumn="shared interaction" name="shared interaction"/>
        <virtualColumn immutable="false" targetJoinKey="SUID" targetTable="4132-Subcommunities/LOCAL_ATTRS-org.cytoscape.model.CyEdge-Subcommunities+default+edge.cytable" sourceJoinKey="SUID" sourceTable="4116-Core+Network+Subcommunities/SHARED_ATTRS-org.cytoscape.model.CyEdge-4116+shared+edge.cytable" sourceColumn="shared name" name="shared name"/>
        <virtualColumn immutable="false" targetJoinKey="SUID" targetTable="4132-Subcommunities/LOCAL_ATTRS-org.cytoscape.model.CyEdge-Subcommunities+default+edge.cytable" sourceJoinKey="SUID" sourceTable="4116-Core+Network+Subcommunities/SHARED_ATTRS-org.cytoscape.model.CyEdge-4116+shared+edge.cytable" sourceColumn="shared interaction" name="shared interaction"/>
        <virtualColumn immutable="false" targetJoinKey="SUID" targetTable="4132-Subcommunities/LOCAL_ATTRS-org.cytoscape.model.CyNetwork-Subcommunities+default+network.cytable" sourceJoinKey="SUID" sourceTable="4116-Core+Network+Subcommunities/SHARED_ATTRS-org.cytoscape.model.CyNetwork-4116+shared+network.cytable" sourceColumn="shared name" name="shared name"/>
        <virtualColumn immutable="false" targetJoinKey="SUID" targetTable="4132-Subcommunities/LOCAL_ATTRS-org.cytoscape.model.CyNode-Subcommunities+default+node.cytable" sourceJoinKey="SUID" sourceTable="4116-Core+Network+Subcommunities/SHARED_ATTRS-org.cytoscape.model.CyNode-4116+shared+node.cytable" sourceColumn="shared name" name="shared name"/>
        <virtualColumn immutable="false" targetJoinKey="SUID" targetTable="36-Basic+Network/LOCAL_ATTRS-org.cytoscape.model.CyNode-36+default+node.cytable" sourceJoinKey="SUID" sourceTable="36-Basic+Network/SHARED_ATTRS-org.cytoscape.model.CyNode-36+shared+node.cytable" sourceColumn="shared name" name="shared name"/>
        <virtualColumn immutable="false" targetJoinKey="SUID" targetTable="12194-Localization/LOCAL_ATTRS-org.cytoscape.model.CyEdge-Localization+default+edge.cytable" sourceJoinKey="SUID" sourceTable="12178-Core+Network+Localization/SHARED_ATTRS-org.cytoscape.model.CyEdge-12178+shared+edge.cytable" sourceColumn="shared name" name="shared name"/>
        <virtualColumn immutable="false" targetJoinKey="SUID" targetTable="12194-Localization/LOCAL_ATTRS-org.cytoscape.model.CyEdge-Localization+default+edge.cytable" sourceJoinKey="SUID" sourceTable="12178-Core+Network+Localization/SHARED_ATTRS-org.cytoscape.model.CyEdge-12178+shared+edge.cytable" sourceColumn="shared interaction" name="shared interaction"/>
        <virtualColumn immutable="false" targetJoinKey="SUID" targetTable="8163-Communities/LOCAL_ATTRS-org.cytoscape.model.CyNetwork-Communities+default+network.cytable" sourceJoinKey="SUID" sourceTable="8147-Core+Network+Communities/SHARED_ATTRS-org.cytoscape.model.CyNetwork-8147+shared+network.cytable" sourceColumn="shared name" name="shared name"/>
        <virtualColumn immutable="false" targetJoinKey="SUID" targetTable="4077-Cytoskeleton+Subnetwork/LOCAL_ATTRS-org.cytoscape.model.CyNetwork-Cytoskeleton+Subnetwork+default+network.cytable" sourceJoinKey="SUID" sourceTable="36-Basic+Network/SHARED_ATTRS-org.cytoscape.model.CyNetwork-36+shared+network.cytable" sourceColumn="shared name" name="shared name"/>
        <virtualColumn immutable="false" targetJoinKey="SUID" targetTable="62-Core+Network+PAZ/LOCAL_ATTRS-org.cytoscape.model.CyNode-Core+Network+PAZ+default+node.cytable" sourceJoinKey="SUID" sourceTable="36-Basic+Network/SHARED_ATTRS-org.cytoscape.model.CyNode-36+shared+node.cytable" sourceColumn="shared name" name="shared name"/>
        <virtualColumn immutable="false" targetJoinKey="SUID" targetTable="12178-Core+Network+Localization/LOCAL_ATTRS-org.cytoscape.model.CyEdge-12178+default+edge.cytable" sourceJoinKey="SUID" sourceTable="12178-Core+Network+Localization/SHARED_ATTRS-org.cytoscape.model.CyEdge-12178+shared+edge.cytable" sourceColumn="shared name" name="shared name"/>
        <virtualColumn immutable="false" targetJoinKey="SUID" targetTable="12178-Core+Network+Localization/LOCAL_ATTRS-org.cytoscape.model.CyEdge-12178+default+edge.cytable" sourceJoinKey="SUID" sourceTable="12178-Core+Network+Localization/SHARED_ATTRS-org.cytoscape.model.CyEdge-12178+shared+edge.cytable" sourceColumn="shared interaction" name="shared interaction"/>
        <virtualColumn immutable="false" targetJoinKey="SUID" targetTable="12178-Core+Network+Localization/LOCAL_ATTRS-org.cytoscape.model.CyNode-12178+default+node.cytable" sourceJoinKey="SUID" sourceTable="12178-Core+Network+Localization/SHARED_ATTRS-org.cytoscape.model.CyNode-12178+shared+node.cytable" sourceColumn="shared name" name="shared name"/>
    </virtualColumns>
</cyTables>
