# Supplementary material for: APP Is a Context-Sensitive Regulator of the Hippocampal Presynaptic Active Zone
Source: PLOS journal article supplement (doi:10.1371/journal.pcbi.1004832), 2016-04-19
Supplement: S6 (10.1371/journal.pcbi.1004832.s006) [file journal.pcbi.1004832.s006.cys › CytoscapeSession-2016_01_22-10_07/views/62-28547-Core+Network+PAZ.xgmml]

<?xml version="1.0" encoding="UTF-8" standalone="yes"?>
<graph id="28547" label="Core Network PAZ" cy:view="1" cy:networkId="62" cy:visualStyle="Localization" cy:rendererId="org.cytoscape.ding" cy:documentVersion="3.0" xmlns:dc="http://purl.org/dc/elements/1.1/" xmlns:xlink="http://www.w3.org/1999/xlink" xmlns:rdf="http://www.w3.org/1999/02/22-rdf-syntax-ns#" xmlns:cy="http://www.cytoscape.org" xmlns="http://www.cs.rpi.edu/XGMML">
  <graphics>
    <att name="NETWORK_NODE_SELECTION" value="true" type="string"/>
    <att name="NETWORK_CENTER_X_LOCATION" value="1413.25" type="string"/>
    <att name="NETWORK_WIDTH" value="606.0" type="string"/>
    <att name="NETWORK_CENTER_Z_LOCATION" value="0.0" type="string"/>
    <att name="NETWORK_CENTER_Y_LOCATION" value="1598.0" type="string"/>
    <att name="NETWORK_TITLE" value="Core Network PAZ" type="string"/>
    <att name="NETWORK_EDGE_SELECTION" value="true" type="string"/>
    <att name="NETWORK_DEPTH" value="0.0" type="string"/>
    <att name="NETWORK_SCALE_FACTOR" value="0.17877557346559206" type="string"/>
    <att name="NETWORK_HEIGHT" value="710.0" type="string"/>
  </graphics>
  <node id="29163" label="Q00493" cy:nodeId="72">
    <graphics x="1575.0" z="0.0" y="2281.0"/>
  </node>
  <node id="29162" label="Q9R1V4" cy:nodeId="73">
    <graphics x="2366.0" z="0.0" y="1079.0"/>
  </node>
  <node id="29161" label="Q9R0P5" cy:nodeId="74">
    <graphics x="1087.595658789267" z="0.0" y="987.5452248629992"/>
  </node>
  <node id="29160" label="O88342" cy:nodeId="75">
    <graphics x="1512.0" z="0.0" y="2191.0"/>
  </node>
  <node id="29159" label="Q9DB73" cy:nodeId="76">
    <graphics x="681.0" z="0.0" y="1308.0"/>
  </node>
  <node id="29158" label="O54774" cy:nodeId="77">
    <graphics x="963.0" z="0.0" y="2451.0"/>
  </node>
  <node id="29157" label="Q8VHW2" cy:nodeId="78">
    <graphics x="2182.0" z="0.0" y="1895.0"/>
  </node>
  <node id="29156" label="P58771" cy:nodeId="79">
    <graphics x="1571.0" z="0.0" y="1041.0"/>
  </node>
  <node id="29155" label="Q03137" cy:nodeId="80">
    <graphics x="1845.0" z="0.0" y="2365.0"/>
  </node>
  <node id="29154" label="Q9QYX7" cy:nodeId="81">
    <graphics x="2826.0" z="0.0" y="790.0"/>
  </node>
  <node id="29153" label="P23927" cy:nodeId="82">
    <graphics x="1181.0" z="0.0" y="1222.0"/>
  </node>
  <node id="29152" label="Q9EQZ6" cy:nodeId="83">
    <graphics x="2574.0" z="0.0" y="898.0"/>
  </node>
  <node id="29151" label="P35802" cy:nodeId="84">
    <graphics x="1281.8483903341526" z="0.0" y="1521.029837399405"/>
  </node>
  <node id="29150" label="P80560" cy:nodeId="85">
    <graphics x="1803.0" z="0.0" y="2199.0"/>
  </node>
  <node id="29149" label="Q60737" cy:nodeId="86">
    <graphics x="1066.940188377585" z="0.0" y="1828.405386857132"/>
  </node>
  <node id="29148" label="Q9CR95" cy:nodeId="87">
    <graphics x="782.0" z="0.0" y="2370.0"/>
  </node>
  <node id="29147" label="Q4KMM3" cy:nodeId="88">
    <graphics x="430.0" z="0.0" y="1817.0"/>
  </node>
  <node id="29146" label="Q9Z0E0" cy:nodeId="89">
    <graphics x="774.3268837295072" z="0.0" y="1666.3217835756318"/>
  </node>
  <node id="29145" label="Q812A2" cy:nodeId="90">
    <graphics x="1674.0" z="0.0" y="1306.0"/>
  </node>
  <node id="29144" label="Q9QZF2" cy:nodeId="91">
    <graphics x="1482.0" z="0.0" y="2297.0"/>
  </node>
  <node id="29143" label="Q91ZZ3" cy:nodeId="92">
    <graphics x="1478.203452218783" z="0.0" y="1661.7307776773202"/>
  </node>
  <node id="29142" label="Q8K400" cy:nodeId="93">
    <graphics x="1268.348111040842" z="0.0" y="1668.0647046246256"/>
  </node>
  <node id="29141" label="Q91WS0" cy:nodeId="94">
    <graphics x="321.0" z="0.0" y="1020.0"/>
  </node>
  <node id="29140" label="Q9JIA1" cy:nodeId="95">
    <graphics x="2081.0" z="0.0" y="1220.0"/>
  </node>
  <node id="29139" label="O89053" cy:nodeId="96">
    <graphics x="1403.8554457328542" z="0.0" y="1733.154257891814"/>
  </node>
  <node id="29138" label="P53994" cy:nodeId="97">
    <graphics x="1705.0" z="0.0" y="1044.0"/>
  </node>
  <node id="29137" label="A2CG49" cy:nodeId="98">
    <graphics x="1836.0" z="0.0" y="1305.0"/>
  </node>
  <node id="29136" label="Q810U4" cy:nodeId="99">
    <graphics x="2089.1915928046246" z="0.0" y="1288.110293666763"/>
  </node>
  <node id="29135" label="D3YVF0" cy:nodeId="100">
    <graphics x="1958.0" z="0.0" y="1452.0"/>
  </node>
  <node id="29134" label="Q9ES97" cy:nodeId="101">
    <graphics x="1321.0" z="0.0" y="1234.0"/>
  </node>
  <node id="29133" label="Q9R1V7" cy:nodeId="102">
    <graphics x="2163.0" z="0.0" y="1470.0"/>
  </node>
  <node id="29132" label="Q6URW6" cy:nodeId="103">
    <graphics x="1582.1345373578956" z="0.0" y="1434.8575207091876"/>
  </node>
  <node id="29131" label="Q9D6K5" cy:nodeId="104">
    <graphics x="1375.0" z="0.0" y="2427.0"/>
  </node>
  <node id="29130" label="Q99KB8" cy:nodeId="105">
    <graphics x="538.9361735427156" z="0.0" y="688.1764042048485"/>
  </node>
  <node id="29129" label="Q9CYT6" cy:nodeId="106">
    <graphics x="1596.0" z="0.0" y="3196.0"/>
  </node>
  <node id="29128" label="Q9D8Y0" cy:nodeId="107">
    <graphics x="1075.025545449018" z="0.0" y="1753.690775792015"/>
  </node>
  <node id="29127" label="Q9Z0P4" cy:nodeId="108">
    <graphics x="1190.7354085845918" z="0.0" y="2144.8594230347953"/>
  </node>
  <node id="29126" label="Q04447" cy:nodeId="109">
    <graphics x="1894.0" z="0.0" y="1013.0"/>
  </node>
  <node id="29125" label="Q9Z2W9" cy:nodeId="110">
    <graphics x="2161.0" z="0.0" y="1927.0"/>
  </node>
  <node id="29124" label="Q63810" cy:nodeId="111">
    <graphics x="2355.0" z="0.0" y="1660.0"/>
  </node>
  <node id="29123" label="Q61330" cy:nodeId="112">
    <graphics x="2561.0" z="0.0" y="1119.0"/>
  </node>
  <node id="29122" label="P13020" cy:nodeId="113">
    <graphics x="1796.0" z="0.0" y="1173.0"/>
  </node>
  <node id="29121" label="Q8K0T0" cy:nodeId="114">
    <graphics x="1235.0" z="0.0" y="1394.0"/>
  </node>
  <node id="29120" label="Q9CWS0" cy:nodeId="115">
    <graphics x="1184.7184064516532" z="0.0" y="1348.7011108187933"/>
  </node>
  <node id="29119" label="Q80XN0" cy:nodeId="116">
    <graphics x="727.8189880621981" z="0.0" y="1630.4873884224908"/>
  </node>
  <node id="29118" label="P43006" cy:nodeId="117">
    <graphics x="1303.0" z="0.0" y="1549.0"/>
  </node>
  <node id="29117" label="Q9ERD7" cy:nodeId="118">
    <graphics x="1832.0" z="0.0" y="1869.0"/>
  </node>
  <node id="29116" label="Q921J2" cy:nodeId="119">
    <graphics x="2021.0" z="0.0" y="1087.0"/>
  </node>
  <node id="29115" label="Q9CQW1" cy:nodeId="120">
    <graphics x="1329.0" z="0.0" y="1642.0"/>
  </node>
  <node id="29114" label="Q6P9K9" cy:nodeId="121">
    <graphics x="2045.0" z="0.0" y="2243.0"/>
  </node>
  <node id="29113" label="Q9CZW5" cy:nodeId="122">
    <graphics x="1086.0" z="0.0" y="744.0"/>
  </node>
  <node id="29112" label="P20152" cy:nodeId="123">
    <graphics x="1078.0" z="0.0" y="1256.0"/>
  </node>
  <node id="29111" label="Q8BRT1" cy:nodeId="124">
    <graphics x="1641.0" z="0.0" y="2322.0"/>
  </node>
  <node id="29110" label="Q8BH59" cy:nodeId="125">
    <graphics x="1591.424525603962" z="0.0" y="1304.38802697123"/>
  </node>
  <node id="29109" label="Q921M7" cy:nodeId="126">
    <graphics x="783.0" z="0.0" y="1597.0"/>
  </node>
  <node id="29108" label="F6SEU4" cy:nodeId="127">
    <graphics x="1935.0" z="0.0" y="1277.0"/>
  </node>
  <node id="29107" label="Q8R366" cy:nodeId="128">
    <graphics x="2075.0" z="0.0" y="1964.0"/>
  </node>
  <node id="29106" label="Q9QYA2" cy:nodeId="129">
    <graphics x="686.1648139507092" z="0.0" y="721.7533697029617"/>
  </node>
  <node id="29105" label="Q61206" cy:nodeId="130">
    <graphics x="2442.0" z="0.0" y="1788.0"/>
  </node>
  <node id="29104" label="Q3ULJ0" cy:nodeId="131">
    <graphics x="749.4756925982929" z="0.0" y="551.9140578732522"/>
  </node>
  <node id="29103" label="Q8CGK3" cy:nodeId="132">
    <graphics x="1031.0" z="0.0" y="763.0"/>
  </node>
  <node id="29102" label="Q03157" cy:nodeId="133">
    <graphics x="2196.0" z="0.0" y="1825.0"/>
  </node>
  <node id="29101" label="Q8R5C5" cy:nodeId="134">
    <graphics x="462.0" z="0.0" y="1853.0"/>
  </node>
  <node id="29100" label="Q78IK2" cy:nodeId="135">
    <graphics x="697.16715970612" z="0.0" y="1235.8235723083203"/>
  </node>
  <node id="29099" label="Q91VT4" cy:nodeId="136">
    <graphics x="596.0" z="0.0" y="693.0"/>
  </node>
  <node id="29098" label="Q61151" cy:nodeId="137">
    <graphics x="2256.0" z="0.0" y="1538.0"/>
  </node>
  <node id="29097" label="Q3THE2" cy:nodeId="138">
    <graphics x="1361.0" z="0.0" y="1286.0"/>
  </node>
  <node id="29096" label="Q920P5" cy:nodeId="139">
    <graphics x="2051.0" z="0.0" y="1125.0"/>
  </node>
  <node id="29095" label="Q2PFD7" cy:nodeId="140">
    <graphics x="1291.0" z="0.0" y="1795.0"/>
  </node>
  <node id="29094" label="Q7TMM9" cy:nodeId="141">
    <graphics x="1629.0" z="0.0" y="1737.0"/>
  </node>
  <node id="29093" label="Q68FH0" cy:nodeId="142">
    <graphics x="1653.8492088978214" z="0.0" y="1651.3881632927048"/>
  </node>
  <node id="29092" label="Q91VR7" cy:nodeId="143">
    <graphics x="1860.0" z="0.0" y="2013.0"/>
  </node>
  <node id="29091" label="Q9CR62" cy:nodeId="144">
    <graphics x="910.0" z="0.0" y="1158.0"/>
  </node>
  <node id="29090" label="Q8CHH9" cy:nodeId="145">
    <graphics x="495.0" z="0.0" y="1899.0"/>
  </node>
  <node id="29089" label="P97300" cy:nodeId="146">
    <graphics x="1680.0" z="0.0" y="1070.0"/>
  </node>
  <node id="29088" label="Q60634" cy:nodeId="147">
    <graphics x="1060.315170256903" z="0.0" y="1650.6322404440336"/>
  </node>
  <node id="29087" label="O08917" cy:nodeId="148">
    <graphics x="1129.9075851284515" z="0.0" y="1694.5661202220167"/>
  </node>
  <node id="29086" label="Q61316" cy:nodeId="149">
    <graphics x="1721.0" z="0.0" y="1169.0"/>
  </node>
  <node id="29085" label="Q9D1T0" cy:nodeId="150">
    <graphics x="1630.0" z="0.0" y="1014.0"/>
  </node>
  <node id="29084" label="P48036" cy:nodeId="151">
    <graphics x="1115.7346337397062" z="0.0" y="1443.3855253546676"/>
  </node>
  <node id="29083" label="P11798" cy:nodeId="152">
    <graphics x="1659.0" z="0.0" y="1714.0"/>
  </node>
  <node id="29082" label="Q8K183" cy:nodeId="153">
    <graphics x="2447.0" z="0.0" y="1406.0"/>
  </node>
  <node id="29081" label="Q99NE5" cy:nodeId="154">
    <graphics x="2236.0" z="0.0" y="1037.0"/>
  </node>
  <node id="29080" label="Q9CR16" cy:nodeId="155">
    <graphics x="1764.0" z="0.0" y="959.0"/>
  </node>
  <node id="29079" label="P57780" cy:nodeId="156">
    <graphics x="1464.0" z="0.0" y="1358.0"/>
  </node>
  <node id="29078" label="Q9QY76" cy:nodeId="157">
    <graphics x="1804.0" z="0.0" y="1896.0"/>
  </node>
  <node id="29077" label="P23242" cy:nodeId="158">
    <graphics x="1557.0" z="0.0" y="1311.0"/>
  </node>
  <node id="29076" label="Q9R1V6" cy:nodeId="159">
    <graphics x="1893.0" z="0.0" y="1188.0"/>
  </node>
  <node id="29075" label="P48758" cy:nodeId="160">
    <graphics x="1729.0" z="0.0" y="1337.0"/>
  </node>
  <node id="29074" label="Q91XV3" cy:nodeId="161">
    <graphics x="1368.0" z="0.0" y="1799.0"/>
  </node>
  <node id="29073" label="P55302" cy:nodeId="162">
    <graphics x="1756.0" z="0.0" y="2663.0"/>
  </node>
  <node id="29072" label="Q8BIJ6" cy:nodeId="163">
    <graphics x="1311.50928249165" z="0.0" y="889.9603975695181"/>
  </node>
  <node id="29071" label="O88643" cy:nodeId="164">
    <graphics x="2058.0" z="0.0" y="1189.0"/>
  </node>
  <node id="29070" label="Q80TZ3" cy:nodeId="165">
    <graphics x="877.0" z="0.0" y="1820.0"/>
  </node>
  <node id="29069" label="Q7TMB8" cy:nodeId="166">
    <graphics x="1235.0" z="0.0" y="1988.0"/>
  </node>
  <node id="29068" label="Q9WV55" cy:nodeId="167">
    <graphics x="1471.0" z="0.0" y="1784.0"/>
  </node>
  <node id="29067" label="O55131" cy:nodeId="168">
    <graphics x="738.0" z="0.0" y="1979.0"/>
  </node>
  <node id="29066" label="O35136" cy:nodeId="169">
    <graphics x="2184.0" z="0.0" y="1669.0"/>
  </node>
  <node id="29065" label="Q7TSJ2" cy:nodeId="170">
    <graphics x="1590.0" z="0.0" y="1709.0"/>
  </node>
  <node id="29064" label="P12960" cy:nodeId="171">
    <graphics x="2203.0" z="0.0" y="1431.0"/>
  </node>
  <node id="29063" label="Q61699" cy:nodeId="172">
    <graphics x="1628.0" z="0.0" y="986.0"/>
  </node>
  <node id="29062" label="P08553" cy:nodeId="173">
    <graphics x="1548.0" z="0.0" y="1718.0"/>
  </node>
  <node id="29061" label="Q8K4Z3" cy:nodeId="174">
    <graphics x="540.0" z="0.0" y="575.0"/>
  </node>
  <node id="29060" label="P08551" cy:nodeId="175">
    <graphics x="1814.0" z="0.0" y="1639.0"/>
  </node>
  <node id="29059" label="Q8VDQ8" cy:nodeId="176">
    <graphics x="384.0" z="0.0" y="1200.0"/>
  </node>
  <node id="29058" label="O54983" cy:nodeId="177">
    <graphics x="348.0" z="0.0" y="1435.0"/>
  </node>
  <node id="29057" label="P40124" cy:nodeId="178">
    <graphics x="1577.0" z="0.0" y="2936.0"/>
  </node>
  <node id="29056" label="P18760" cy:nodeId="179">
    <graphics x="1552.0" z="0.0" y="2597.0"/>
  </node>
  <node id="29055" label="Q9Z2I0" cy:nodeId="180">
    <graphics x="831.5763424903462" z="0.0" y="1662.6393320769553"/>
  </node>
  <node id="29054" label="Q9Z2Q6" cy:nodeId="181">
    <graphics x="561.0" z="0.0" y="2018.0"/>
  </node>
  <node id="29053" label="Q9WV34" cy:nodeId="182">
    <graphics x="1855.0" z="0.0" y="1119.0"/>
  </node>
  <node id="29052" label="P42208" cy:nodeId="183">
    <graphics x="749.0" z="0.0" y="1801.0"/>
  </node>
  <node id="29051" label="P28661" cy:nodeId="184">
    <graphics x="960.0" z="0.0" y="1852.0"/>
  </node>
  <node id="29050" label="P26645" cy:nodeId="185">
    <graphics x="1532.0" z="0.0" y="1912.0"/>
  </node>
  <node id="29049" label="P84096" cy:nodeId="186">
    <graphics x="2123.0" z="0.0" y="1290.0"/>
  </node>
  <node id="29048" label="O35143" cy:nodeId="187">
    <graphics x="794.0" z="0.0" y="1258.0"/>
  </node>
  <node id="29047" label="P48722" cy:nodeId="188">
    <graphics x="1678.0" z="0.0" y="964.0"/>
  </node>
  <node id="29046" label="P63321" cy:nodeId="189">
    <graphics x="1838.0" z="0.0" y="1452.0"/>
  </node>
  <node id="29045" label="Q8K021" cy:nodeId="190">
    <graphics x="1113.0" z="0.0" y="1830.0"/>
  </node>
  <node id="29044" label="Q8CI94" cy:nodeId="191">
    <graphics x="1208.0" z="0.0" y="646.0"/>
  </node>
  <node id="29043" label="P48962" cy:nodeId="192">
    <graphics x="1162.0" z="0.0" y="1089.0"/>
  </node>
  <node id="29042" label="Q71LX4" cy:nodeId="193">
    <graphics x="1163.0" z="0.0" y="2221.0"/>
  </node>
  <node id="29041" label="P43406" cy:nodeId="194">
    <graphics x="1461.0" z="0.0" y="2194.0"/>
  </node>
  <node id="29040" label="Q9D880" cy:nodeId="195">
    <graphics x="1209.1373138628887" z="0.0" y="1239.976117112821"/>
  </node>
  <node id="29039" label="O35857" cy:nodeId="196">
    <graphics x="1177.5" z="0.0" y="1164.0"/>
  </node>
  <node id="29038" label="Q9CWZ7" cy:nodeId="197">
    <graphics x="1395.4924027717057" z="0.0" y="1935.7403542266054"/>
  </node>
  <node id="29037" label="P28740" cy:nodeId="198">
    <graphics x="1576.0" z="0.0" y="2012.0"/>
  </node>
  <node id="29036" label="Q922H2" cy:nodeId="199">
    <graphics x="1205.0" z="0.0" y="501.0"/>
  </node>
  <node id="29035" label="P46096" cy:nodeId="200">
    <graphics x="1284.0" z="0.0" y="1648.0"/>
  </node>
  <node id="29034" label="Q61490" cy:nodeId="201">
    <graphics x="684.0" z="0.0" y="2118.0"/>
  </node>
  <node id="29033" label="Q9CZ42" cy:nodeId="202">
    <graphics x="772.0" z="0.0" y="286.0"/>
  </node>
  <node id="29032" label="P35564" cy:nodeId="203">
    <graphics x="1073.0" z="0.0" y="1669.0"/>
  </node>
  <node id="29031" label="P19096" cy:nodeId="204">
    <graphics x="1044.0" z="0.0" y="442.0"/>
  </node>
  <node id="29030" label="Q61644" cy:nodeId="205">
    <graphics x="1201.0" z="0.0" y="2268.0"/>
  </node>
  <node id="29029" label="Q8BZ98" cy:nodeId="206">
    <graphics x="1159.0" z="0.0" y="2071.0"/>
  </node>
  <node id="29028" label="Q5RJI5" cy:nodeId="207">
    <graphics x="1365.0" z="0.0" y="1523.0"/>
  </node>
  <node id="29027" label="O55100" cy:nodeId="208">
    <graphics x="1847.0" z="0.0" y="1352.0"/>
  </node>
  <node id="29026" label="P61164" cy:nodeId="209">
    <graphics x="1294.0" z="0.0" y="1432.0"/>
  </node>
  <node id="29025" label="Q8R191" cy:nodeId="210">
    <graphics x="932.0" z="0.0" y="1785.0"/>
  </node>
  <node id="29024" label="O35643" cy:nodeId="211">
    <graphics x="1141.0" z="0.0" y="1587.0"/>
  </node>
  <node id="29023" label="Q99P72" cy:nodeId="212">
    <graphics x="1456.0" z="0.0" y="1160.0"/>
  </node>
  <node id="29022" label="Q60930" cy:nodeId="213">
    <graphics x="1133.0" z="0.0" y="1064.0"/>
  </node>
  <node id="29021" label="P20444" cy:nodeId="214">
    <graphics x="1438.0" z="0.0" y="2146.0"/>
  </node>
  <node id="29020" label="Q9QXS1" cy:nodeId="215">
    <graphics x="2029.0" z="0.0" y="1413.0"/>
  </node>
  <node id="29019" label="O08599" cy:nodeId="216">
    <graphics x="1761.0" z="0.0" y="1797.0"/>
  </node>
  <node id="29018" label="Q8BW75" cy:nodeId="217">
    <graphics x="960.0" z="0.0" y="63.0"/>
  </node>
  <node id="29017" label="O35239" cy:nodeId="218">
    <graphics x="1425.0" z="0.0" y="2573.0"/>
  </node>
  <node id="29016" label="Q5DQR4" cy:nodeId="219">
    <graphics x="716.7832348888792" z="0.0" y="1574.1910907702766"/>
  </node>
  <node id="29015" label="Q9EPJ9" cy:nodeId="220">
    <graphics x="621.0" z="0.0" y="1755.0"/>
  </node>
  <node id="29014" label="P00405" cy:nodeId="221">
    <graphics x="632.0" z="0.0" y="1217.0"/>
  </node>
  <node id="29013" label="P56564" cy:nodeId="222">
    <graphics x="1167.0" z="0.0" y="1724.0"/>
  </node>
  <node id="29012" label="P70296" cy:nodeId="223">
    <graphics x="1122.106578309209" z="0.0" y="826.6053583860112"/>
  </node>
  <node id="29011" label="P63318" cy:nodeId="224">
    <graphics x="1452.0" z="0.0" y="1589.0"/>
  </node>
  <node id="29010" label="P27546" cy:nodeId="225">
    <graphics x="1500.8237949700472" z="0.0" y="1459.4864667377674"/>
  </node>
  <node id="29009" label="P58281" cy:nodeId="226">
    <graphics x="824.0" z="0.0" y="1162.0"/>
  </node>
  <node id="29008" label="Q8R3V5" cy:nodeId="227">
    <graphics x="1018.0" z="0.0" y="2411.0"/>
  </node>
  <node id="29007" label="P67871" cy:nodeId="228">
    <graphics x="1133.5" z="0.0" y="1780.0"/>
  </node>
  <node id="29006" label="Q810U3" cy:nodeId="229">
    <graphics x="2239.0" z="0.0" y="1730.0"/>
  </node>
  <node id="29005" label="Q61553" cy:nodeId="230">
    <graphics x="1090.555618441596" z="0.0" y="1280.724339522398"/>
  </node>
  <node id="29004" label="Q80U28" cy:nodeId="231">
    <graphics x="1063.0" z="0.0" y="935.0"/>
  </node>
  <node id="29003" label="P19246" cy:nodeId="232">
    <graphics x="1758.0" z="0.0" y="1935.0"/>
  </node>
  <node id="29002" label="P62743" cy:nodeId="233">
    <graphics x="847.0" z="0.0" y="2071.0"/>
  </node>
  <node id="29001" label="P22723" cy:nodeId="234">
    <graphics x="2493.0" z="0.0" y="1704.0"/>
  </node>
  <node id="29000" label="Q60605" cy:nodeId="235">
    <graphics x="1820.0" z="0.0" y="1095.0"/>
  </node>
  <node id="28999" label="P47708" cy:nodeId="236">
    <graphics x="1668.0" z="0.0" y="1400.0"/>
  </node>
  <node id="28998" label="Q8VBV7" cy:nodeId="237">
    <graphics x="1022.1686328678684" z="0.0" y="1374.5896274932352"/>
  </node>
  <node id="28997" label="Q9DC28" cy:nodeId="238">
    <graphics x="1802.0" z="0.0" y="1359.0"/>
  </node>
  <node id="28996" label="P35279" cy:nodeId="239">
    <graphics x="1674.0" z="0.0" y="1037.0"/>
  </node>
  <node id="28995" label="Q9CRB9" cy:nodeId="240">
    <graphics x="1029.0" z="0.0" y="933.0"/>
  </node>
  <node id="28994" label="Q9CQI6" cy:nodeId="241">
    <graphics x="1463.0" z="0.0" y="1987.0"/>
  </node>
  <node id="28993" label="P62821" cy:nodeId="242">
    <graphics x="1867.0" z="0.0" y="940.0"/>
  </node>
  <node id="28992" label="P50396" cy:nodeId="243">
    <graphics x="1995.0" z="0.0" y="1178.0"/>
  </node>
  <node id="28991" label="Q9WU78" cy:nodeId="244">
    <graphics x="1325.0" z="0.0" y="1897.0"/>
  </node>
  <node id="28990" label="P0C0A3" cy:nodeId="245">
    <graphics x="1182.0" z="0.0" y="2111.0"/>
  </node>
  <node id="28989" label="Q9R0P9" cy:nodeId="246">
    <graphics x="1087.0" z="0.0" y="1406.0"/>
  </node>
  <node id="28988" label="Q80UU9" cy:nodeId="247">
    <graphics x="784.0" z="0.0" y="1558.0"/>
  </node>
  <node id="28987" label="O55023" cy:nodeId="248">
    <graphics x="1065.0" z="0.0" y="1082.0"/>
  </node>
  <node id="28986" label="Q60875" cy:nodeId="249">
    <graphics x="1983.0" z="0.0" y="1494.0"/>
  </node>
  <node id="28985" label="Q61411" cy:nodeId="250">
    <graphics x="1585.0" z="0.0" y="1104.0"/>
  </node>
  <node id="28984" label="Q8CHC4" cy:nodeId="251">
    <graphics x="1127.0" z="0.0" y="2200.0"/>
  </node>
  <node id="28983" label="Q91VZ6" cy:nodeId="252">
    <graphics x="832.0" z="0.0" y="1670.0"/>
  </node>
  <node id="28982" label="Q9WUB3" cy:nodeId="253">
    <graphics x="1367.0" z="0.0" y="427.0"/>
  </node>
  <node id="28981" label="Q62465" cy:nodeId="254">
    <graphics x="1601.761170409258" z="0.0" y="1381.527813857665"/>
  </node>
  <node id="28980" label="Q9D0F9" cy:nodeId="255">
    <graphics x="1327.0" z="0.0" y="423.0"/>
  </node>
  <node id="28979" label="Q9R111" cy:nodeId="256">
    <graphics x="1278.6234367859552" z="0.0" y="1125.6563650090295"/>
  </node>
  <node id="28978" label="Q6PIC6" cy:nodeId="257">
    <graphics x="1642.0" z="0.0" y="1621.0"/>
  </node>
  <node id="28977" label="Q80VP1" cy:nodeId="258">
    <graphics x="876.0" z="0.0" y="2082.0"/>
  </node>
  <node id="28976" label="P68181" cy:nodeId="259">
    <graphics x="1897.0" z="0.0" y="1301.0"/>
  </node>
  <node id="28975" label="P28663" cy:nodeId="260">
    <graphics x="1240.0" z="0.0" y="1906.0"/>
  </node>
  <node id="28974" label="Q6P1F6" cy:nodeId="261">
    <graphics x="2247.0" z="0.0" y="1569.0"/>
  </node>
  <node id="28973" label="P41216" cy:nodeId="262">
    <graphics x="824.0" z="0.0" y="400.0"/>
  </node>
  <node id="28972" label="Q9D6F9" cy:nodeId="263">
    <graphics x="1604.0" z="0.0" y="824.0"/>
  </node>
  <node id="28971" label="Q99PJ0" cy:nodeId="264">
    <graphics x="1895.3939366919894" z="0.0" y="1704.1202029122962"/>
  </node>
  <node id="28970" label="Q99MR8" cy:nodeId="265">
    <graphics x="891.0" z="0.0" y="442.0"/>
  </node>
  <node id="28969" label="Q8BH04" cy:nodeId="266">
    <graphics x="1180.0" z="0.0" y="614.0"/>
  </node>
  <node id="28968" label="Q8BWF0" cy:nodeId="267">
    <graphics x="993.0" z="0.0" y="536.0"/>
  </node>
  <node id="28967" label="Q91WC3" cy:nodeId="268">
    <graphics x="501.0" z="0.0" y="715.0"/>
  </node>
  <node id="28966" label="Q3UVX5" cy:nodeId="269">
    <graphics x="1982.0" z="0.0" y="1695.0"/>
  </node>
  <node id="28965" label="P20357" cy:nodeId="270">
    <graphics x="1898.0" z="0.0" y="1688.0"/>
  </node>
  <node id="28964" label="P01831" cy:nodeId="271">
    <graphics x="894.0" z="0.0" y="1892.0"/>
  </node>
  <node id="28963" label="Q9D8B3" cy:nodeId="272">
    <graphics x="1142.0" z="0.0" y="1875.0"/>
  </node>
  <node id="28962" label="P28667" cy:nodeId="273">
    <graphics x="2099.4578551430077" z="0.0" y="1333.5938324960434"/>
  </node>
  <node id="28961" label="O55042" cy:nodeId="274">
    <graphics x="1201.0" z="0.0" y="1519.0"/>
  </node>
  <node id="28960" label="P63328" cy:nodeId="275">
    <graphics x="2162.0" z="0.0" y="1615.0"/>
  </node>
  <node id="28959" label="Q91ZJ5" cy:nodeId="276">
    <graphics x="1085.0" z="0.0" y="473.0"/>
  </node>
  <node id="28958" label="P60469" cy:nodeId="277">
    <graphics x="2002.0" z="0.0" y="1791.0"/>
  </node>
  <node id="28957" label="Q62419" cy:nodeId="278">
    <graphics x="1160.0" z="0.0" y="2140.0"/>
  </node>
  <node id="28956" label="P45376" cy:nodeId="279">
    <graphics x="1156.0" z="0.0" y="830.0"/>
  </node>
  <node id="28955" label="O54991" cy:nodeId="280">
    <graphics x="1904.0" z="0.0" y="1078.0"/>
  </node>
  <node id="28954" label="B9EKR1" cy:nodeId="281">
    <graphics x="2225.0" z="0.0" y="1145.0"/>
  </node>
  <node id="28953" label="Q9QYR6" cy:nodeId="282">
    <graphics x="1628.0" z="0.0" y="1963.0"/>
  </node>
  <node id="28952" label="O08585" cy:nodeId="283">
    <graphics x="999.0" z="0.0" y="1735.0"/>
  </node>
  <node id="28951" label="Q60932" cy:nodeId="284">
    <graphics x="1277.0" z="0.0" y="1007.0"/>
  </node>
  <node id="28950" label="Q3UHL1" cy:nodeId="285">
    <graphics x="1416.0" z="0.0" y="1836.0"/>
  </node>
  <node id="28949" label="Q9CPQ1" cy:nodeId="286">
    <graphics x="519.0" z="0.0" y="1207.0"/>
  </node>
  <node id="28948" label="Q5SQX6" cy:nodeId="287">
    <graphics x="1511.0" z="0.0" y="1531.0"/>
  </node>
  <node id="28947" label="Q80Y14" cy:nodeId="288">
    <graphics x="597.5" z="0.0" y="746.0"/>
  </node>
  <node id="28946" label="Q9Z0R4" cy:nodeId="289">
    <graphics x="1010.0" z="0.0" y="2082.0"/>
  </node>
  <node id="28945" label="P00493" cy:nodeId="290">
    <graphics x="1345.0" z="0.0" y="1077.0"/>
  </node>
  <node id="28944" label="P60761" cy:nodeId="291">
    <graphics x="1534.0" z="0.0" y="2026.0"/>
  </node>
  <node id="28943" label="Q64332" cy:nodeId="292">
    <graphics x="1533.0" z="0.0" y="1787.0"/>
  </node>
  <node id="28942" label="O70318" cy:nodeId="293">
    <graphics x="2236.0" z="0.0" y="1878.0"/>
  </node>
  <node id="28941" label="O08539" cy:nodeId="294">
    <graphics x="1059.0" z="0.0" y="2159.0"/>
  </node>
  <node id="28940" label="Q9CS84" cy:nodeId="295">
    <graphics x="2092.0" z="0.0" y="2158.0"/>
  </node>
  <node id="28939" label="P40630" cy:nodeId="296">
    <graphics x="938.3805737829621" z="0.0" y="1049.2191584701268"/>
  </node>
  <node id="28938" label="Q9JIS5" cy:nodeId="297">
    <graphics x="2027.0" z="0.0" y="1145.0"/>
  </node>
  <node id="28937" label="Q8BYM5" cy:nodeId="298">
    <graphics x="1926.0" z="0.0" y="2163.0"/>
  </node>
  <node id="28936" label="Q4ACU6" cy:nodeId="299">
    <graphics x="1634.0" z="0.0" y="2149.0"/>
  </node>
  <node id="28935" label="P48453" cy:nodeId="300">
    <graphics x="2066.0" z="0.0" y="1605.0"/>
  </node>
  <node id="28934" label="Q925I1" cy:nodeId="301">
    <graphics x="1100.0" z="0.0" y="1167.0"/>
  </node>
  <node id="28933" label="Q62261" cy:nodeId="302">
    <graphics x="2173.0" z="0.0" y="1212.5"/>
  </node>
  <node id="28932" label="Q9R0N7" cy:nodeId="303">
    <graphics x="1266.5" z="0.0" y="2177.0"/>
  </node>
  <node id="28931" label="Q60996" cy:nodeId="304">
    <graphics x="2150.0" z="0.0" y="1536.0"/>
  </node>
  <node id="28930" label="P62482" cy:nodeId="305">
    <graphics x="1504.9932139046537" z="0.0" y="1460.0113767145322"/>
  </node>
  <node id="28929" label="P30999" cy:nodeId="306">
    <graphics x="1752.0" z="0.0" y="1649.0"/>
  </node>
  <node id="28928" label="Q68FF6" cy:nodeId="307">
    <graphics x="1818.0" z="0.0" y="1245.0"/>
  </node>
  <node id="28927" label="P23818" cy:nodeId="308">
    <graphics x="2051.0" z="0.0" y="1643.0"/>
  </node>
  <node id="28926" label="Q9DBJ1" cy:nodeId="309">
    <graphics x="1337.0" z="0.0" y="673.0"/>
  </node>
  <node id="28925" label="P68254" cy:nodeId="310">
    <graphics x="1907.0" z="0.0" y="1807.0"/>
  </node>
  <node id="28924" label="P62204" cy:nodeId="311">
    <graphics x="1734.0" z="0.0" y="1625.0"/>
  </node>
  <node id="28923" label="P17156" cy:nodeId="312">
    <graphics x="1348.0" z="0.0" y="1036.0"/>
  </node>
  <node id="28922" label="Q99K85" cy:nodeId="313">
    <graphics x="1173.0" z="0.0" y="1031.0"/>
  </node>
  <node id="28921" label="P28652" cy:nodeId="314">
    <graphics x="1855.0" z="0.0" y="1610.0"/>
  </node>
  <node id="28920" label="P70414" cy:nodeId="315">
    <graphics x="1691.0" z="0.0" y="2116.0"/>
  </node>
  <node id="28919" label="Q6PIE5" cy:nodeId="316">
    <graphics x="1538.0" z="0.0" y="1945.0"/>
  </node>
  <node id="28918" label="P47802" cy:nodeId="317">
    <graphics x="368.0" z="0.0" y="605.0"/>
  </node>
  <node id="28917" label="Q9R0Y5" cy:nodeId="318">
    <graphics x="1183.0" z="0.0" y="778.0"/>
  </node>
  <node id="28916" label="P68033" cy:nodeId="319">
    <graphics x="1804.0" z="0.0" y="1298.0"/>
  </node>
  <node id="28915" label="Q9QXJ1" cy:nodeId="320">
    <graphics x="2080.0" z="0.0" y="1883.0"/>
  </node>
  <node id="28914" label="P84091" cy:nodeId="321">
    <graphics x="815.0" z="0.0" y="2043.0"/>
  </node>
  <node id="28913" label="Q9Z218" cy:nodeId="322">
    <graphics x="1745.9066662015578" z="0.0" y="1635.2275316833247"/>
  </node>
  <node id="28912" label="P99024" cy:nodeId="323">
    <graphics x="1811.0" z="0.0" y="1958.0"/>
  </node>
  <node id="28911" label="P03995" cy:nodeId="324">
    <graphics x="2159.0" z="0.0" y="1299.0"/>
  </node>
  <node id="28910" label="P16330" cy:nodeId="325">
    <graphics x="1972.0" z="0.0" y="1807.0"/>
  </node>
  <node id="28909" label="O70589" cy:nodeId="326">
    <graphics x="1889.0" z="0.0" y="1977.0"/>
  </node>
  <node id="28908" label="Q8BKX1" cy:nodeId="327">
    <graphics x="1495.0" z="0.0" y="1634.0"/>
  </node>
  <node id="28907" label="P13595" cy:nodeId="328">
    <graphics x="2062.0" z="0.0" y="1527.0"/>
  </node>
  <node id="28906" label="P11627" cy:nodeId="329">
    <graphics x="2082.0" z="0.0" y="1465.0"/>
  </node>
  <node id="28905" label="P62746" cy:nodeId="330">
    <graphics x="2150.0" z="0.0" y="1248.0"/>
  </node>
  <node id="28904" label="P16858" cy:nodeId="331">
    <graphics x="1323.0" z="0.0" y="1083.0"/>
  </node>
  <node id="28903" label="Q8VD37" cy:nodeId="332">
    <graphics x="903.0" z="0.0" y="1940.0"/>
  </node>
  <node id="28902" label="Q8QZT1" cy:nodeId="333">
    <graphics x="804.0" z="0.0" y="577.0"/>
  </node>
  <node id="28901" label="Q60931" cy:nodeId="334">
    <graphics x="847.0" z="0.0" y="988.0"/>
  </node>
  <node id="28900" label="P17665" cy:nodeId="335">
    <graphics x="306.0" z="0.0" y="1149.0"/>
  </node>
  <node id="28899" label="Q9JLZ3" cy:nodeId="336">
    <graphics x="752.0" z="0.0" y="314.0"/>
  </node>
  <node id="28898" label="Q8CAQ8" cy:nodeId="337">
    <graphics x="773.0" z="0.0" y="635.0"/>
  </node>
  <node id="28897" label="Q99L43" cy:nodeId="338">
    <graphics x="771.6793606432097" z="0.0" y="1518.622428907514"/>
  </node>
  <node id="28896" label="Q8VDP6" cy:nodeId="339">
    <graphics x="839.5" z="0.0" y="1472.0"/>
  </node>
  <node id="28895" label="Q9Z0X1" cy:nodeId="340">
    <graphics x="999.0" z="0.0" y="1003.0"/>
  </node>
  <node id="28894" label="P61161" cy:nodeId="341">
    <graphics x="1656.703584731759" z="0.0" y="1814.2774196102619"/>
  </node>
  <node id="28893" label="Q60598" cy:nodeId="342">
    <graphics x="1732.0" z="0.0" y="1847.5"/>
  </node>
  <node id="28892" label="P63011" cy:nodeId="343">
    <graphics x="1871.0" z="0.0" y="1132.0"/>
  </node>
  <node id="28891" label="P38647" cy:nodeId="344">
    <graphics x="1649.0" z="0.0" y="1271.0"/>
  </node>
  <node id="28890" label="Q62425" cy:nodeId="345">
    <graphics x="723.0" z="0.0" y="1108.0"/>
  </node>
  <node id="28889" label="Q8BMF3" cy:nodeId="346">
    <graphics x="1136.0" z="0.0" y="603.0"/>
  </node>
  <node id="28888" label="Q9Z1J3" cy:nodeId="347">
    <graphics x="1008.0" z="0.0" y="738.0"/>
  </node>
  <node id="28887" label="Q9DCB8" cy:nodeId="348">
    <graphics x="754.0" z="0.0" y="749.0"/>
  </node>
  <node id="28886" label="O88712" cy:nodeId="349">
    <graphics x="1160.0" z="0.0" y="1524.0"/>
  </node>
  <node id="28885" label="Q8BHL5" cy:nodeId="350">
    <graphics x="1339.0" z="0.0" y="2213.0"/>
  </node>
  <node id="28884" label="Q9QXS6" cy:nodeId="351">
    <graphics x="1437.0" z="0.0" y="1688.0"/>
  </node>
  <node id="28883" label="P17183" cy:nodeId="352">
    <graphics x="1296.0" z="0.0" y="719.0"/>
  </node>
  <node id="28882" label="Q6IRU5" cy:nodeId="353">
    <graphics x="881.0" z="0.0" y="2203.0"/>
  </node>
  <node id="28881" label="Q9DBG3" cy:nodeId="354">
    <graphics x="1055.0" z="0.0" y="1949.0"/>
  </node>
  <node id="28880" label="P55088" cy:nodeId="355">
    <graphics x="872.511456149256" z="0.0" y="1622.4475736284721"/>
  </node>
  <node id="28879" label="P10637" cy:nodeId="356">
    <graphics x="1084.0" z="0.0" y="1835.5"/>
  </node>
  <node id="28878" label="Q922R8" cy:nodeId="357">
    <graphics x="1147.0" z="0.0" y="1474.0"/>
  </node>
  <node id="28877" label="P68368" cy:nodeId="358">
    <graphics x="1493.0" z="0.0" y="1472.0"/>
  </node>
  <node id="28876" label="P47857" cy:nodeId="359">
    <graphics x="1366.0" z="0.0" y="771.0"/>
  </node>
  <node id="28875" label="Q9D6M3" cy:nodeId="360">
    <graphics x="1496.9872428554377" z="0.0" y="1439.1999100335843"/>
  </node>
  <node id="28874" label="Q62048" cy:nodeId="361">
    <graphics x="2228.0" z="0.0" y="1211.0"/>
  </node>
  <node id="28873" label="Q99104" cy:nodeId="362">
    <graphics x="1922.0" z="0.0" y="1422.0"/>
  </node>
  <node id="28872" label="P60766" cy:nodeId="363">
    <graphics x="1931.0" z="0.0" y="1480.0"/>
  </node>
  <node id="28871" label="Q6R891" cy:nodeId="364">
    <graphics x="1587.0" z="0.0" y="1584.0"/>
  </node>
  <node id="28870" label="P62835" cy:nodeId="365">
    <graphics x="1783.0" z="0.0" y="1263.0"/>
  </node>
  <node id="28869" label="Q8BLK3" cy:nodeId="366">
    <graphics x="2108.0" z="0.0" y="1926.0"/>
  </node>
  <node id="28868" label="Q91ZX7" cy:nodeId="367">
    <graphics x="1685.0" z="0.0" y="2376.0"/>
  </node>
  <node id="28867" label="P08226" cy:nodeId="368">
    <graphics x="1848.0" z="0.0" y="2053.0"/>
  </node>
  <node id="28866" label="Q8R0S4" cy:nodeId="369">
    <graphics x="1851.0" z="0.0" y="533.0"/>
  </node>
  <node id="28865" label="Q61290" cy:nodeId="370">
    <graphics x="2016.0" z="0.0" y="296.0"/>
  </node>
  <node id="28864" label="P42125" cy:nodeId="371">
    <graphics x="647.0" z="0.0" y="709.0"/>
  </node>
  <node id="28863" label="Q8BGD5" cy:nodeId="372">
    <graphics x="498.0" z="0.0" y="293.0"/>
  </node>
  <node id="28862" label="Q9Z268" cy:nodeId="373">
    <graphics x="2435.0" z="0.0" y="1851.0"/>
  </node>
  <node id="28861" label="Q8BMS1" cy:nodeId="374">
    <graphics x="895.0" z="0.0" y="619.0"/>
  </node>
  <node id="28860" label="P17182" cy:nodeId="375">
    <graphics x="1322.0" z="0.0" y="808.0"/>
  </node>
  <node id="28859" label="Q9CPW4" cy:nodeId="376">
    <graphics x="1358.0" z="0.0" y="2012.0"/>
  </node>
  <node id="28858" label="Q8BKZ9" cy:nodeId="377">
    <graphics x="1019.0" z="0.0" y="596.0"/>
  </node>
  <node id="28857" label="P05063" cy:nodeId="378">
    <graphics x="1351.0" z="0.0" y="838.0"/>
  </node>
  <node id="28856" label="Q60597" cy:nodeId="379">
    <graphics x="968.0" z="0.0" y="697.0"/>
  </node>
  <node id="28855" label="Q9WUA3" cy:nodeId="380">
    <graphics x="1430.0" z="0.0" y="866.0"/>
  </node>
  <node id="28854" label="P61982" cy:nodeId="381">
    <graphics x="1779.0" z="0.0" y="1417.0"/>
  </node>
  <node id="28853" label="P07901" cy:nodeId="382">
    <graphics x="1760.0" z="0.0" y="1141.0"/>
  </node>
  <node id="28852" label="P06837" cy:nodeId="383">
    <graphics x="1652.0" z="0.0" y="1787.0"/>
  </node>
  <node id="28851" label="P15116" cy:nodeId="384">
    <graphics x="1861.0" z="0.0" y="1528.0"/>
  </node>
  <node id="28850" label="Q7TQF7" cy:nodeId="385">
    <graphics x="1008.0" z="0.0" y="2166.0"/>
  </node>
  <node id="28849" label="Q99L47" cy:nodeId="386">
    <graphics x="1797.0" z="0.0" y="709.0"/>
  </node>
  <node id="28848" label="P29758" cy:nodeId="387">
    <graphics x="1372.0" z="0.0" y="545.0"/>
  </node>
  <node id="28847" label="Q8CHT0" cy:nodeId="388">
    <graphics x="1173.0" z="0.0" y="296.0"/>
  </node>
  <node id="28846" label="P97772" cy:nodeId="389">
    <graphics x="2027.0" z="0.0" y="1565.0"/>
  </node>
  <node id="28845" label="Q8BR92" cy:nodeId="390">
    <graphics x="2256.0" z="0.0" y="1354.0"/>
  </node>
  <node id="28844" label="P31324" cy:nodeId="391">
    <graphics x="1986.0" z="0.0" y="1422.0"/>
  </node>
  <node id="28843" label="Q6PB66" cy:nodeId="392">
    <graphics x="880.0" z="0.0" y="962.0"/>
  </node>
  <node id="28842" label="P39053" cy:nodeId="393">
    <graphics x="1294.0" z="0.0" y="1897.0"/>
  </node>
  <node id="28841" label="Q6PH08" cy:nodeId="394">
    <graphics x="1917.0" z="0.0" y="1164.0"/>
  </node>
  <node id="28840" label="O88737" cy:nodeId="395">
    <graphics x="1962.0" z="0.0" y="1209.0"/>
  </node>
  <node id="28839" label="Q9CQC7" cy:nodeId="396">
    <graphics x="490.0" z="0.0" y="897.0"/>
  </node>
  <node id="28838" label="Q9CVB6" cy:nodeId="397">
    <graphics x="1446.0" z="0.0" y="1922.0"/>
  </node>
  <node id="28837" label="P59999" cy:nodeId="398">
    <graphics x="1487.0" z="0.0" y="1906.0"/>
  </node>
  <node id="28836" label="Q8CHU3" cy:nodeId="399">
    <graphics x="1055.8618482678366" z="0.0" y="1943.1878989705713"/>
  </node>
  <node id="28835" label="Q5FWK3" cy:nodeId="400">
    <graphics x="2250.0" z="0.0" y="1493.0"/>
  </node>
  <node id="28834" label="Q9WTT4" cy:nodeId="401">
    <graphics x="495.0" z="0.0" y="1635.0"/>
  </node>
  <node id="28833" label="Q00612" cy:nodeId="402">
    <graphics x="1090.0" z="0.0" y="555.0"/>
  </node>
  <node id="28832" label="Q9D6J5" cy:nodeId="403">
    <graphics x="550.0" z="0.0" y="997.0"/>
  </node>
  <node id="28831" label="P23506" cy:nodeId="404">
    <graphics x="731.0" z="0.0" y="1239.0"/>
  </node>
  <node id="28830" label="Q6PCP5" cy:nodeId="405">
    <graphics x="736.0" z="0.0" y="1548.0"/>
  </node>
  <node id="28829" label="Q8VDN2" cy:nodeId="406">
    <graphics x="1666.0" z="0.0" y="1837.0"/>
  </node>
  <node id="28828" label="Q64516" cy:nodeId="407">
    <graphics x="894.0" z="0.0" y="282.0"/>
  </node>
  <node id="28827" label="Q9DBF1" cy:nodeId="408">
    <graphics x="1103.0" z="0.0" y="0.0"/>
  </node>
  <node id="28826" label="Q8R001" cy:nodeId="409">
    <graphics x="1743.4893959875646" z="0.0" y="1591.6388719506272"/>
  </node>
  <node id="28825" label="Q9QWI6" cy:nodeId="410">
    <graphics x="1672.5" z="0.0" y="1550.0"/>
  </node>
  <node id="28824" label="P63101" cy:nodeId="411">
    <graphics x="1519.5" z="0.0" y="1379.0"/>
  </node>
  <node id="28823" label="Q61879" cy:nodeId="412">
    <graphics x="1875.0" z="0.0" y="1240.0"/>
  </node>
  <node id="28822" label="Q91ZA3" cy:nodeId="413">
    <graphics x="985.0" z="0.0" y="418.0"/>
  </node>
  <node id="28821" label="Q3UMR5" cy:nodeId="414">
    <graphics x="407.0" z="0.0" y="1768.0"/>
  </node>
  <node id="28820" label="P56382" cy:nodeId="415">
    <graphics x="664.0" z="0.0" y="1259.0"/>
  </node>
  <node id="28819" label="P09103" cy:nodeId="416">
    <graphics x="1302.0" z="0.0" y="1361.0"/>
  </node>
  <node id="28818" label="P14873" cy:nodeId="417">
    <graphics x="1807.0" z="0.0" y="1731.0"/>
  </node>
  <node id="28817" label="P43024" cy:nodeId="418">
    <graphics x="509.0" z="0.0" y="1173.0"/>
  </node>
  <node id="28816" label="Q62420" cy:nodeId="419">
    <graphics x="1083.0" z="0.0" y="1977.0"/>
  </node>
  <node id="28815" label="Q9EP69" cy:nodeId="420">
    <graphics x="961.0" z="0.0" y="2296.0"/>
  </node>
  <node id="28814" label="P26040" cy:nodeId="421">
    <graphics x="2173.0" z="0.0" y="1169.0"/>
  </node>
  <node id="28813" label="P70441" cy:nodeId="422">
    <graphics x="2492.0" z="0.0" y="1092.0"/>
  </node>
  <node id="28812" label="P61264" cy:nodeId="423">
    <graphics x="1587.0" z="0.0" y="1924.0"/>
  </node>
  <node id="28811" label="Q7TPR4" cy:nodeId="424">
    <graphics x="1115.0" z="0.0" y="2005.0"/>
  </node>
  <node id="28810" label="Q3UTJ2" cy:nodeId="425">
    <graphics x="1199.5" z="0.0" y="1738.5"/>
  </node>
  <node id="28809" label="P06745" cy:nodeId="426">
    <graphics x="1222.0" z="0.0" y="728.0"/>
  </node>
  <node id="28808" label="Q920I9" cy:nodeId="427">
    <graphics x="1457.0" z="0.0" y="1143.0"/>
  </node>
  <node id="28807" label="Q923T9" cy:nodeId="428">
    <graphics x="1934.0" z="0.0" y="1378.0"/>
  </node>
  <node id="28806" label="P63040" cy:nodeId="429">
    <graphics x="1362.0" z="0.0" y="1934.0"/>
  </node>
  <node id="28805" label="Q61831" cy:nodeId="430">
    <graphics x="1846.0" z="0.0" y="1400.0"/>
  </node>
  <node id="28804" label="P50544" cy:nodeId="431">
    <graphics x="621.0" z="0.0" y="492.0"/>
  </node>
  <node id="28803" label="Q9Z2I9" cy:nodeId="432">
    <graphics x="758.0" z="0.0" y="856.0"/>
  </node>
  <node id="28802" label="Q61301" cy:nodeId="433">
    <graphics x="2102.0" z="0.0" y="1717.0"/>
  </node>
  <node id="28801" label="Q9DB05" cy:nodeId="434">
    <graphics x="1486.0" z="0.0" y="2571.0"/>
  </node>
  <node id="28800" label="P52480" cy:nodeId="435">
    <graphics x="1260.0" z="0.0" y="665.0"/>
  </node>
  <node id="28799" label="Q93092" cy:nodeId="436">
    <graphics x="1301.0" z="0.0" y="626.0"/>
  </node>
  <node id="28798" label="Q9JHI5" cy:nodeId="437">
    <graphics x="664.0" z="0.0" y="468.0"/>
  </node>
  <node id="28797" label="P53395" cy:nodeId="438">
    <graphics x="837.0" z="0.0" y="647.0"/>
  </node>
  <node id="28796" label="Q9DBL1" cy:nodeId="439">
    <graphics x="857.0" z="0.0" y="427.0"/>
  </node>
  <node id="28795" label="Q8K1M6" cy:nodeId="440">
    <graphics x="926.0" z="0.0" y="1320.0"/>
  </node>
  <node id="28794" label="Q9CQ92" cy:nodeId="441">
    <graphics x="991.0" z="0.0" y="1714.0"/>
  </node>
  <node id="28793" label="P63082" cy:nodeId="442">
    <graphics x="517.0" z="0.0" y="1572.0"/>
  </node>
  <node id="28792" label="Q8BPN8" cy:nodeId="443">
    <graphics x="1275.0" z="0.0" y="1295.0"/>
  </node>
  <node id="28791" label="O35465" cy:nodeId="444">
    <graphics x="2162.0" z="0.0" y="1369.0"/>
  </node>
  <node id="28790" label="P18572" cy:nodeId="445">
    <graphics x="2475.0" z="0.0" y="1310.0"/>
  </node>
  <node id="28789" label="P09671" cy:nodeId="446">
    <graphics x="819.0" z="0.0" y="822.0"/>
  </node>
  <node id="28788" label="P16054" cy:nodeId="447">
    <graphics x="1241.0" z="0.0" y="1121.0"/>
  </node>
  <node id="28787" label="P62962" cy:nodeId="448">
    <graphics x="1522.0" z="0.0" y="2073.0"/>
  </node>
  <node id="28786" label="Q61102" cy:nodeId="449">
    <graphics x="1300.8154960061802" z="0.0" y="567.897176152477"/>
  </node>
  <node id="28785" label="P22315" cy:nodeId="450">
    <graphics x="1239.5" z="0.0" y="513.0"/>
  </node>
  <node id="28784" label="P35486" cy:nodeId="451">
    <graphics x="998.0" z="0.0" y="677.0"/>
  </node>
  <node id="28783" label="Q9CZT8" cy:nodeId="452">
    <graphics x="1444.8495392431594" z="0.0" y="1709.7189669217823"/>
  </node>
  <node id="28782" label="P47754" cy:nodeId="453">
    <graphics x="1386.0" z="0.0" y="1363.0"/>
  </node>
  <node id="28781" label="P14094" cy:nodeId="454">
    <graphics x="1821.0" z="0.0" y="2085.0"/>
  </node>
  <node id="28780" label="Q99JY9" cy:nodeId="455">
    <graphics x="1588.0" z="0.0" y="2117.0"/>
  </node>
  <node id="28779" label="Q99MN9" cy:nodeId="456">
    <graphics x="798.0" z="0.0" y="485.0"/>
  </node>
  <node id="28778" label="Q99PT1" cy:nodeId="457">
    <graphics x="1727.0" z="0.0" y="1233.0"/>
  </node>
  <node id="28777" label="P62823" cy:nodeId="458">
    <graphics x="1483.420195086037" z="0.0" y="1605.4360648808333"/>
  </node>
  <node id="28776" label="O88935" cy:nodeId="459">
    <graphics x="1622.0" z="0.0" y="1807.0"/>
  </node>
  <node id="28775" label="P97450" cy:nodeId="460">
    <graphics x="671.0" z="0.0" y="1109.0"/>
  </node>
  <node id="28774" label="Q64010" cy:nodeId="461">
    <graphics x="1718.0" z="0.0" y="1517.0"/>
  </node>
  <node id="28773" label="Q9JLM8" cy:nodeId="462">
    <graphics x="1289.0" z="0.0" y="1487.0"/>
  </node>
  <node id="28772" label="P20108" cy:nodeId="463">
    <graphics x="868.0" z="0.0" y="726.0"/>
  </node>
  <node id="28771" label="Q9QUH0" cy:nodeId="464">
    <graphics x="575.0" z="0.0" y="645.0"/>
  </node>
  <node id="28770" label="Q64521" cy:nodeId="465">
    <graphics x="803.5" z="0.0" y="614.0"/>
  </node>
  <node id="28769" label="P13707" cy:nodeId="466">
    <graphics x="1084.0" z="0.0" y="402.0"/>
  </node>
  <node id="28768" label="Q9R0K7" cy:nodeId="467">
    <graphics x="1501.0" z="0.0" y="1739.0"/>
  </node>
  <node id="28767" label="Q80T41" cy:nodeId="468">
    <graphics x="1409.8731433551407" z="0.0" y="1814.9651551520562"/>
  </node>
  <node id="28766" label="Q9D898" cy:nodeId="469">
    <graphics x="1418.0" z="0.0" y="2043.0"/>
  </node>
  <node id="28765" label="P63017" cy:nodeId="470">
    <graphics x="1630.0" z="0.0" y="1221.0"/>
  </node>
  <node id="28764" label="P45878" cy:nodeId="471">
    <graphics x="20.8220389163489" z="0.0" y="1763.7484813042258"/>
  </node>
  <node id="28763" label="Q61548" cy:nodeId="472">
    <graphics x="1025.0" z="0.0" y="2268.0"/>
  </node>
  <node id="28762" label="P12367" cy:nodeId="473">
    <graphics x="2011.0" z="0.0" y="1381.0"/>
  </node>
  <node id="28761" label="Q9D023" cy:nodeId="474">
    <graphics x="522.0" z="0.0" y="856.0"/>
  </node>
  <node id="28760" label="P56379" cy:nodeId="475">
    <graphics x="381.0" z="0.0" y="1112.0"/>
  </node>
  <node id="28759" label="P18052" cy:nodeId="476">
    <graphics x="1672.0" z="0.0" y="1907.0"/>
  </node>
  <node id="28758" label="P70232" cy:nodeId="477">
    <graphics x="1764.0" z="0.0" y="2213.0"/>
  </node>
  <node id="28757" label="Q9CZS1" cy:nodeId="478">
    <graphics x="931.0" z="0.0" y="133.0"/>
  </node>
  <node id="28756" label="O35129" cy:nodeId="479">
    <graphics x="1011.0" z="0.0" y="1126.0"/>
  </node>
  <node id="28755" label="O88696" cy:nodeId="480">
    <graphics x="814.0" z="0.0" y="918.0"/>
  </node>
  <node id="28754" label="Q9CQQ7" cy:nodeId="481">
    <graphics x="659.0" z="0.0" y="1022.0"/>
  </node>
  <node id="28753" label="Q9JJV2" cy:nodeId="482">
    <graphics x="1406.0" z="0.0" y="1952.0"/>
  </node>
  <node id="28752" label="Q9DC69" cy:nodeId="483">
    <graphics x="694.0" z="0.0" y="1023.0"/>
  </node>
  <node id="28751" label="Q91VM9" cy:nodeId="484">
    <graphics x="594.0" z="0.0" y="1247.0"/>
  </node>
  <node id="28750" label="Q9DB77" cy:nodeId="485">
    <graphics x="818.0" z="0.0" y="1067.0"/>
  </node>
  <node id="28749" label="Q8K3J1" cy:nodeId="486">
    <graphics x="707.0" z="0.0" y="1076.0"/>
  </node>
  <node id="28748" label="Q9D855" cy:nodeId="487">
    <graphics x="593.0" z="0.0" y="1003.0"/>
  </node>
  <node id="28747" label="Q9JHU4" cy:nodeId="488">
    <graphics x="1778.0" z="0.0" y="1474.0"/>
  </node>
  <node id="28746" label="P46660" cy:nodeId="489">
    <graphics x="1584.0" z="0.0" y="1655.0"/>
  </node>
  <node id="28745" label="P63044" cy:nodeId="490">
    <graphics x="1313.5" z="0.0" y="1597.0"/>
  </node>
  <node id="28744" label="Q62351" cy:nodeId="491">
    <graphics x="899.0" z="0.0" y="1398.0"/>
  </node>
  <node id="28743" label="P63001" cy:nodeId="492">
    <graphics x="2049.0" z="0.0" y="1494.0"/>
  </node>
  <node id="28742" label="Q8BG51" cy:nodeId="493">
    <graphics x="2286.0" z="0.0" y="1412.0"/>
  </node>
  <node id="28741" label="Q9CXZ1" cy:nodeId="494">
    <graphics x="487.0" z="0.0" y="950.0"/>
  </node>
  <node id="28740" label="Q60676" cy:nodeId="495">
    <graphics x="1974.0" z="0.0" y="1329.0"/>
  </node>
  <node id="28739" label="Q8JZN5" cy:nodeId="496">
    <graphics x="660.0" z="0.0" y="532.0"/>
  </node>
  <node id="28738" label="Q8JZQ2" cy:nodeId="497">
    <graphics x="1413.0" z="0.0" y="1061.0"/>
  </node>
  <node id="28737" label="P51174" cy:nodeId="498">
    <graphics x="669.0" z="0.0" y="492.0"/>
  </node>
  <node id="28736" label="Q8VDD5" cy:nodeId="499">
    <graphics x="1842.0" z="0.0" y="1200.0"/>
  </node>
  <node id="28735" label="P18872" cy:nodeId="500">
    <graphics x="1469.0" z="0.0" y="1178.0"/>
  </node>
  <node id="28734" label="Q9CQ75" cy:nodeId="501">
    <graphics x="473.0" z="0.0" y="1071.0"/>
  </node>
  <node id="28733" label="P03930" cy:nodeId="502">
    <graphics x="703.0" z="0.0" y="1260.0"/>
  </node>
  <node id="28732" label="P49615" cy:nodeId="503">
    <graphics x="1866.0" z="0.0" y="2212.0"/>
  </node>
  <node id="28731" label="P39688" cy:nodeId="504">
    <graphics x="1726.0" z="0.0" y="2074.0"/>
  </node>
  <node id="28730" label="P04925" cy:nodeId="505">
    <graphics x="1820.5" z="0.0" y="1670.0"/>
  </node>
  <node id="28729" label="Q99JY0" cy:nodeId="506">
    <graphics x="937.0" z="0.0" y="658.0"/>
  </node>
  <node id="28728" label="O08756" cy:nodeId="507">
    <graphics x="702.0" z="0.0" y="789.0"/>
  </node>
  <node id="28727" label="P28660" cy:nodeId="508">
    <graphics x="1282.0" z="0.0" y="1696.0"/>
  </node>
  <node id="28726" label="P60879" cy:nodeId="509">
    <graphics x="1350.5" z="0.0" y="1673.0"/>
  </node>
  <node id="28725" label="Q9DCJ5" cy:nodeId="510">
    <graphics x="684.0" z="0.0" y="986.0"/>
  </node>
  <node id="28724" label="Q91YT0" cy:nodeId="511">
    <graphics x="735.0" z="0.0" y="958.0"/>
  </node>
  <node id="28723" label="Q9JM76" cy:nodeId="512">
    <graphics x="1383.0" z="0.0" y="1830.0"/>
  </node>
  <node id="28722" label="Q9R0Q6" cy:nodeId="513">
    <graphics x="1243.0" z="0.0" y="1844.0"/>
  </node>
  <node id="28721" label="Q68FD5" cy:nodeId="514">
    <graphics x="1133.0" z="0.0" y="1914.5"/>
  </node>
  <node id="28720" label="Q9QYJ0" cy:nodeId="515">
    <graphics x="1810.0" z="0.0" y="1019.0"/>
  </node>
  <node id="28719" label="Q60864" cy:nodeId="516">
    <graphics x="1535.0" z="0.0" y="1103.0"/>
  </node>
  <node id="28718" label="P19536" cy:nodeId="517">
    <graphics x="567.0" z="0.0" y="1203.0"/>
  </node>
  <node id="28717" label="Q99N28" cy:nodeId="518">
    <graphics x="2297.0" z="0.0" y="1944.0"/>
  </node>
  <node id="28716" label="Q9JLB0" cy:nodeId="519">
    <graphics x="2433.0" z="0.0" y="2131.0"/>
  </node>
  <node id="28715" label="Q8BVE3" cy:nodeId="520">
    <graphics x="1169.563122109241" z="0.0" y="1369.7224003516967"/>
  </node>
  <node id="28714" label="P50518" cy:nodeId="521">
    <graphics x="592.0" z="0.0" y="1591.0"/>
  </node>
  <node id="28713" label="P97797" cy:nodeId="522">
    <graphics x="1816.955594554381" z="0.0" y="779.4767307148734"/>
  </node>
  <node id="28712" label="Q61735" cy:nodeId="523">
    <graphics x="1768.5" z="0.0" y="846.0"/>
  </node>
  <node id="28711" label="Q9DCX2" cy:nodeId="524">
    <graphics x="643.0" z="0.0" y="1173.0"/>
  </node>
  <node id="28710" label="Q7TMF3" cy:nodeId="525">
    <graphics x="836.0" z="0.0" y="845.0"/>
  </node>
  <node id="28709" label="O35658" cy:nodeId="526">
    <graphics x="857.5" z="0.0" y="1034.0"/>
  </node>
  <node id="28708" label="Q99KR7" cy:nodeId="527">
    <graphics x="1012.0" z="0.0" y="848.0"/>
  </node>
  <node id="28707" label="Q9EQ20" cy:nodeId="528">
    <graphics x="872.0" z="0.0" y="225.0"/>
  </node>
  <node id="28706" label="P62874" cy:nodeId="529">
    <graphics x="1604.0" z="0.0" y="1410.0"/>
  </node>
  <node id="28705" label="P63213" cy:nodeId="530">
    <graphics x="1657.0" z="0.0" y="1167.0"/>
  </node>
  <node id="28704" label="P40142" cy:nodeId="531">
    <graphics x="1262.0" z="0.0" y="630.0"/>
  </node>
  <node id="28703" label="Q9CQR4" cy:nodeId="532">
    <graphics x="844.0" z="0.0" y="883.0"/>
  </node>
  <node id="28702" label="Q9CQV8" cy:nodeId="533">
    <graphics x="1690.0" z="0.0" y="1381.0"/>
  </node>
  <node id="28701" label="P99029" cy:nodeId="534">
    <graphics x="625.0" z="0.0" y="854.0"/>
  </node>
  <node id="28700" label="P62073" cy:nodeId="535">
    <graphics x="763.0" z="0.0" y="1128.0"/>
  </node>
  <node id="28699" label="Q62277" cy:nodeId="536">
    <graphics x="1165.0" z="0.0" y="1628.0"/>
  </node>
  <node id="28698" label="Q60631" cy:nodeId="537">
    <graphics x="1380.0" z="0.0" y="1894.0"/>
  </node>
  <node id="28697" label="P52503" cy:nodeId="538">
    <graphics x="523.0" z="0.0" y="1014.0"/>
  </node>
  <node id="28696" label="Q8R4N0" cy:nodeId="539">
    <graphics x="1090.0" z="0.0" y="860.0"/>
  </node>
  <node id="28695" label="Q3ULD5" cy:nodeId="540">
    <graphics x="876.0" z="0.0" y="487.0"/>
  </node>
  <node id="28694" label="Q8VEM8" cy:nodeId="541">
    <graphics x="668.0" z="0.0" y="914.0"/>
  </node>
  <node id="28693" label="P68369" cy:nodeId="542">
    <graphics x="1525.5" z="0.0" y="1538.0"/>
  </node>
  <node id="28692" label="Q8K2B3" cy:nodeId="543">
    <graphics x="939.0" z="0.0" y="925.0"/>
  </node>
  <node id="28691" label="Q91WD5" cy:nodeId="544">
    <graphics x="743.0" z="0.0" y="878.0"/>
  </node>
  <node id="28690" label="P51881" cy:nodeId="545">
    <graphics x="1499.0" z="0.0" y="1142.0"/>
  </node>
  <node id="28689" label="P05480" cy:nodeId="546">
    <graphics x="1435.0" z="0.0" y="1487.0"/>
  </node>
  <node id="28688" label="Q02248" cy:nodeId="547">
    <graphics x="1703.0" z="0.0" y="1753.0"/>
  </node>
  <node id="28687" label="P60710" cy:nodeId="548">
    <graphics x="1478.0" z="0.0" y="1690.0"/>
  </node>
  <node id="28686" label="Q6PHZ2" cy:nodeId="549">
    <graphics x="1754.0" z="0.0" y="1713.0"/>
  </node>
  <node id="28685" label="P97807" cy:nodeId="550">
    <graphics x="907.0" z="0.0" y="867.0"/>
  </node>
  <node id="28684" label="Q9ERS2" cy:nodeId="551">
    <graphics x="633.0" z="0.0" y="1128.0"/>
  </node>
  <node id="28683" label="Q99KI0" cy:nodeId="552">
    <graphics x="974.0" z="0.0" y="967.0"/>
  </node>
  <node id="28682" label="O08788" cy:nodeId="553">
    <graphics x="2087.0" z="0.0" y="1684.0"/>
  </node>
  <node id="28681" label="Q99KJ8" cy:nodeId="554">
    <graphics x="2042.5" z="0.0" y="1393.0"/>
  </node>
  <node id="28680" label="Q91Z53" cy:nodeId="555">
    <graphics x="895.0" z="0.0" y="744.0"/>
  </node>
  <node id="28679" label="P26443" cy:nodeId="556">
    <graphics x="1125.0" z="0.0" y="637.0"/>
  </node>
  <node id="28678" label="Q62442" cy:nodeId="557">
    <graphics x="1497.0" z="0.0" y="2006.0"/>
  </node>
  <node id="28677" label="Q9D172" cy:nodeId="558">
    <graphics x="584.0" z="0.0" y="809.0"/>
  </node>
  <node id="28676" label="P56391" cy:nodeId="559">
    <graphics x="493.0" z="0.0" y="1109.0"/>
  </node>
  <node id="28675" label="Q9WV18" cy:nodeId="560">
    <graphics x="1393.9030667668067" z="0.0" y="1734.229496030682"/>
  </node>
  <node id="28674" label="O35526" cy:nodeId="561">
    <graphics x="1571.0" z="0.0" y="1785.0"/>
  </node>
  <node id="28673" label="Q8R5M8" cy:nodeId="562">
    <graphics x="2197.0" z="0.0" y="2211.0"/>
  </node>
  <node id="28672" label="Q9WV92" cy:nodeId="563">
    <graphics x="2011.0" z="0.0" y="2129.0"/>
  </node>
  <node id="28671" label="P62814" cy:nodeId="564">
    <graphics x="516.0" z="0.0" y="1462.0"/>
  </node>
  <node id="28670" label="P12023" cy:nodeId="565">
    <graphics x="1372.0" z="0.0" y="1623.5"/>
  </node>
  <node id="28669" label="P61922" cy:nodeId="566">
    <graphics x="1087.0" z="0.0" y="282.0"/>
  </node>
  <node id="28668" label="P48320" cy:nodeId="567">
    <graphics x="1265.0" z="0.0" y="353.0"/>
  </node>
  <node id="28667" label="P17710" cy:nodeId="568">
    <graphics x="1460.0" z="0.0" y="644.0"/>
  </node>
  <node id="28666" label="P05064" cy:nodeId="569">
    <graphics x="1407.0" z="0.0" y="715.0"/>
  </node>
  <node id="28665" label="P11499" cy:nodeId="570">
    <graphics x="1518.0" z="0.0" y="1213.0"/>
  </node>
  <node id="28664" label="Q8K1Z0" cy:nodeId="571">
    <graphics x="567.0" z="0.0" y="851.0"/>
  </node>
  <node id="28663" label="P62331" cy:nodeId="572">
    <graphics x="664.0" z="0.0" y="1856.0"/>
  </node>
  <node id="28662" label="Q99LX0" cy:nodeId="573">
    <graphics x="855.0" z="0.0" y="1184.0"/>
  </node>
  <node id="28661" label="Q8BGH2" cy:nodeId="574">
    <graphics x="719.5" z="0.0" y="797.0"/>
  </node>
  <node id="28660" label="Q99LC5" cy:nodeId="575">
    <graphics x="804.0" z="0.0" y="789.0"/>
  </node>
  <node id="28659" label="Q61425" cy:nodeId="576">
    <graphics x="825.0" z="0.0" y="511.0"/>
  </node>
  <node id="28658" label="P12787" cy:nodeId="577">
    <graphics x="640.0" z="0.0" y="1089.0"/>
  </node>
  <node id="28657" label="Q9CQA3" cy:nodeId="578">
    <graphics x="804.0" z="0.0" y="965.0"/>
  </node>
  <node id="28656" label="Q8BWT1" cy:nodeId="579">
    <graphics x="900.0" z="0.0" y="524.0"/>
  </node>
  <node id="28655" label="Q921G7" cy:nodeId="580">
    <graphics x="876.0" z="0.0" y="677.0"/>
  </node>
  <node id="28654" label="Q9Z1B3" cy:nodeId="581">
    <graphics x="1257.0" z="0.0" y="1622.0"/>
  </node>
  <node id="28653" label="O70161" cy:nodeId="582">
    <graphics x="982.0" z="0.0" y="1949.0"/>
  </node>
  <node id="28652" label="Q6PER3" cy:nodeId="583">
    <graphics x="2157.0" z="0.0" y="1967.0"/>
  </node>
  <node id="28651" label="P63005" cy:nodeId="584">
    <graphics x="2143.0" z="0.0" y="1688.0"/>
  </node>
  <node id="28650" label="P47738" cy:nodeId="585">
    <graphics x="1020.0" z="0.0" y="115.0"/>
  </node>
  <node id="28649" label="Q64133" cy:nodeId="586">
    <graphics x="921.0" z="0.0" y="64.0"/>
  </node>
  <node id="28648" label="P48771" cy:nodeId="587">
    <graphics x="518.0" z="0.0" y="1126.0"/>
  </node>
  <node id="28647" label="O70325" cy:nodeId="588">
    <graphics x="550.0" z="0.0" y="918.0"/>
  </node>
  <node id="28646" label="P62812" cy:nodeId="589">
    <graphics x="2663.0" z="0.0" y="1833.0"/>
  </node>
  <node id="28645" label="P63137" cy:nodeId="590">
    <graphics x="2528.0" z="0.0" y="1743.0"/>
  </node>
  <node id="28644" label="Q9Z1P6" cy:nodeId="591">
    <graphics x="514.0" z="0.0" y="980.0"/>
  </node>
  <node id="28643" label="P09411" cy:nodeId="592">
    <graphics x="1114.0" z="0.0" y="768.0"/>
  </node>
  <node id="28642" label="P17751" cy:nodeId="593">
    <graphics x="1104.5" z="0.0" y="907.0"/>
  </node>
  <node id="28641" label="Q7TQI3" cy:nodeId="594">
    <graphics x="819.0" z="0.0" y="1617.0"/>
  </node>
  <node id="28640" label="O88441" cy:nodeId="595">
    <graphics x="627.0" z="0.0" y="797.0"/>
  </node>
  <node id="28639" label="P70404" cy:nodeId="596">
    <graphics x="981.0" z="0.0" y="897.0"/>
  </node>
  <node id="28638" label="P50516" cy:nodeId="597">
    <graphics x="798.0" z="0.0" y="1587.5"/>
  </node>
  <node id="28637" label="P57746" cy:nodeId="598">
    <graphics x="541.0" z="0.0" y="1415.0"/>
  </node>
  <node id="28636" label="P17426" cy:nodeId="599">
    <graphics x="1077.0" z="0.0" y="1916.0"/>
  </node>
  <node id="28635" label="P17427" cy:nodeId="600">
    <graphics x="944.0" z="0.0" y="2111.0"/>
  </node>
  <node id="28634" label="P31938" cy:nodeId="601">
    <graphics x="1653.0" z="0.0" y="1206.0"/>
  </node>
  <node id="28633" label="Q3UIU2" cy:nodeId="602">
    <graphics x="461.0" z="0.0" y="1023.0"/>
  </node>
  <node id="28632" label="Q9D2G2" cy:nodeId="603">
    <graphics x="877.0" z="0.0" y="806.0"/>
  </node>
  <node id="28631" label="P62897" cy:nodeId="604">
    <graphics x="498.0" z="0.0" y="924.0"/>
  </node>
  <node id="28630" label="Q9CQ62" cy:nodeId="605">
    <graphics x="1051.0" z="0.0" y="694.0"/>
  </node>
  <node id="28629" label="Q08331" cy:nodeId="606">
    <graphics x="1569.0" z="0.0" y="905.0"/>
  </node>
  <node id="28628" label="P46460" cy:nodeId="607">
    <graphics x="1432.0" z="0.0" y="2009.5"/>
  </node>
  <node id="28627" label="P15105" cy:nodeId="608">
    <graphics x="1284.0" z="0.0" y="689.0"/>
  </node>
  <node id="28626" label="Q9CPP6" cy:nodeId="609">
    <graphics x="573.0" z="0.0" y="948.0"/>
  </node>
  <node id="28625" label="Q9DCW4" cy:nodeId="610">
    <graphics x="707.0" z="0.0" y="821.0"/>
  </node>
  <node id="28624" label="P63037" cy:nodeId="611">
    <graphics x="1391.0" z="0.0" y="1033.0"/>
  </node>
  <node id="28623" label="Q9CQN1" cy:nodeId="612">
    <graphics x="1039.0" z="0.0" y="997.0"/>
  </node>
  <node id="28622" label="Q9D0K2" cy:nodeId="613">
    <graphics x="730.0" z="0.0" y="479.0"/>
  </node>
  <node id="28621" label="Q9WUM5" cy:nodeId="614">
    <graphics x="877.0" z="0.0" y="847.0"/>
  </node>
  <node id="28620" label="Q9Z1G4" cy:nodeId="615">
    <graphics x="683.0" z="0.0" y="1643.0"/>
  </node>
  <node id="28619" label="Q9D1K2" cy:nodeId="616">
    <graphics x="498.0" z="0.0" y="1383.0"/>
  </node>
  <node id="28618" label="Q9D0S9" cy:nodeId="617">
    <graphics x="545.0" z="0.0" y="760.0"/>
  </node>
  <node id="28617" label="Q9DC70" cy:nodeId="618">
    <graphics x="688.0" z="0.0" y="943.0"/>
  </node>
  <node id="28616" label="Q06185" cy:nodeId="619">
    <graphics x="592.0" z="0.0" y="1112.0"/>
  </node>
  <node id="28615" label="Q9CQJ8" cy:nodeId="620">
    <graphics x="614.0" z="0.0" y="1032.0"/>
  </node>
  <node id="28614" label="P05132" cy:nodeId="621">
    <graphics x="1962.0" z="0.0" y="1288.0"/>
  </node>
  <node id="28613" label="P52196" cy:nodeId="622">
    <graphics x="1152.0" z="0.0" y="707.0"/>
  </node>
  <node id="28612" label="Q9CR68" cy:nodeId="623">
    <graphics x="747.0" z="0.0" y="1002.0"/>
  </node>
  <node id="28611" label="Q9DCS9" cy:nodeId="624">
    <graphics x="603.0" z="0.0" y="912.0"/>
  </node>
  <node id="28610" label="Q91VD9" cy:nodeId="625">
    <graphics x="736.0" z="0.0" y="923.0"/>
  </node>
  <node id="28609" label="Q9CPQ8" cy:nodeId="626">
    <graphics x="397.0" z="0.0" y="1051.0"/>
  </node>
  <node id="28608" label="Q91VR2" cy:nodeId="627">
    <graphics x="904.0" z="0.0" y="1094.0"/>
  </node>
  <node id="28607" label="Q9JLJ2" cy:nodeId="628">
    <graphics x="947.0" z="0.0" y="453.0"/>
  </node>
  <node id="28606" label="P67778" cy:nodeId="629">
    <graphics x="960.0" z="0.0" y="1070.0"/>
  </node>
  <node id="28605" label="P68404" cy:nodeId="630">
    <graphics x="1713.0" z="0.0" y="1715.0"/>
  </node>
  <node id="28604" label="P17742" cy:nodeId="631">
    <graphics x="1184.0" z="0.0" y="844.0"/>
  </node>
  <node id="28603" label="P56480" cy:nodeId="632">
    <graphics x="1010.0" z="0.0" y="1075.0"/>
  </node>
  <node id="28602" label="Q61598" cy:nodeId="633">
    <graphics x="1503.0" z="0.0" y="1003.0"/>
  </node>
  <node id="28601" label="P61027" cy:nodeId="634">
    <graphics x="1676.0" z="0.0" y="736.0"/>
  </node>
  <node id="28600" label="P63085" cy:nodeId="635">
    <graphics x="1920.0" z="0.0" y="1335.0"/>
  </node>
  <node id="28599" label="Q05920" cy:nodeId="636">
    <graphics x="1114.0" z="0.0" y="590.0"/>
  </node>
  <node id="28598" label="Q8BMF4" cy:nodeId="637">
    <graphics x="1158.0" z="0.0" y="879.0"/>
  </node>
  <node id="28597" label="Q99LY9" cy:nodeId="638">
    <graphics x="474.0" z="0.0" y="998.0"/>
  </node>
  <node id="28596" label="Q99LC3" cy:nodeId="639">
    <graphics x="535.0" z="0.0" y="1046.0"/>
  </node>
  <node id="28595" label="Q9D0M3" cy:nodeId="640">
    <graphics x="759.0" z="0.0" y="1045.0"/>
  </node>
  <node id="28594" label="Q9CZ13" cy:nodeId="641">
    <graphics x="828.0" z="0.0" y="1020.0"/>
  </node>
  <node id="28593" label="Q8BH95" cy:nodeId="642">
    <graphics x="723.0" z="0.0" y="633.0"/>
  </node>
  <node id="28592" label="P63038" cy:nodeId="643">
    <graphics x="1232.5" z="0.0" y="913.0"/>
  </node>
  <node id="28591" label="Q8BK64" cy:nodeId="644">
    <graphics x="1615.0" z="0.0" y="921.0"/>
  </node>
  <node id="28590" label="P19783" cy:nodeId="645">
    <graphics x="600.0" z="0.0" y="1161.0"/>
  </node>
  <node id="28589" label="O88952" cy:nodeId="646">
    <graphics x="1919.0" z="0.0" y="1861.0"/>
  </node>
  <node id="28588" label="Q6P9K8" cy:nodeId="647">
    <graphics x="2076.0" z="0.0" y="2090.0"/>
  </node>
  <node id="28587" label="Q9Z2H5" cy:nodeId="648">
    <graphics x="2541.0" z="0.0" y="1922.0"/>
  </node>
  <node id="28586" label="Q3UHD9" cy:nodeId="649">
    <graphics x="2371.0" z="0.0" y="1722.0"/>
  </node>
  <node id="28585" label="Q9CQH3" cy:nodeId="650">
    <graphics x="664.0" z="0.0" y="1059.0"/>
  </node>
  <node id="28584" label="Q9DB20" cy:nodeId="651">
    <graphics x="673.5" z="0.0" y="1157.0"/>
  </node>
  <node id="28583" label="P06151" cy:nodeId="652">
    <graphics x="1269.0" z="0.0" y="812.0"/>
  </node>
  <node id="28582" label="P54071" cy:nodeId="653">
    <graphics x="1099.0" z="0.0" y="814.0"/>
  </node>
  <node id="28581" label="Q9D6R2" cy:nodeId="654">
    <graphics x="972.0" z="0.0" y="846.0"/>
  </node>
  <node id="28580" label="P08249" cy:nodeId="655">
    <graphics x="907.0" z="0.0" y="918.0"/>
  </node>
  <node id="28579" label="Q9CQ69" cy:nodeId="656">
    <graphics x="548.0" z="0.0" y="1144.0"/>
  </node>
  <node id="28578" label="Q9DCT2" cy:nodeId="657">
    <graphics x="734.0" z="0.0" y="1031.0"/>
  </node>
  <node id="28577" label="Q9CQ54" cy:nodeId="658">
    <graphics x="451.0" z="0.0" y="953.0"/>
  </node>
  <node id="28576" label="Q9CQZ6" cy:nodeId="659">
    <graphics x="556.0" z="0.0" y="1082.0"/>
  </node>
  <node id="28575" label="Q76MZ3" cy:nodeId="660">
    <graphics x="1937.0" z="0.0" y="1545.0"/>
  </node>
  <node id="28574" label="P63330" cy:nodeId="661">
    <graphics x="2126.0" z="0.0" y="1430.0"/>
  </node>
  <node id="28573" label="P16546" cy:nodeId="662">
    <graphics x="2012.0" z="0.0" y="1597.0"/>
  </node>
  <node id="28572" label="Q8C8R3" cy:nodeId="663">
    <graphics x="2352.0" z="0.0" y="1590.0"/>
  </node>
  <node id="28571" label="P47757" cy:nodeId="664">
    <graphics x="1432.5" z="0.0" y="1656.0"/>
  </node>
  <node id="28570" label="P62259" cy:nodeId="665">
    <graphics x="1498.0" z="0.0" y="1399.0"/>
  </node>
  <node id="28569" label="Q9Z1G3" cy:nodeId="666">
    <graphics x="735.0" z="0.0" y="1506.0"/>
  </node>
  <node id="28568" label="P51863" cy:nodeId="667">
    <graphics x="863.0" z="0.0" y="1568.0"/>
  </node>
  <node id="28567" label="Q9DCD0" cy:nodeId="668">
    <graphics x="1074.0" z="0.0" y="612.0"/>
  </node>
  <node id="28566" label="Q9CZU6" cy:nodeId="669">
    <graphics x="969.0" z="0.0" y="783.0"/>
  </node>
  <node id="28565" label="P35436" cy:nodeId="670">
    <graphics x="1807.0" z="0.0" y="1578.0"/>
  </node>
  <node id="28564" label="P23819" cy:nodeId="671">
    <graphics x="1910.0" z="0.0" y="1729.0"/>
  </node>
  <node id="28563" label="Q06335" cy:nodeId="672">
    <graphics x="2227.0" z="0.0" y="1678.0"/>
  </node>
  <node id="28562" label="Q9QUI0" cy:nodeId="673">
    <graphics x="2072.0" z="0.0" y="1434.0"/>
  </node>
  <node id="28561" label="P05202" cy:nodeId="674">
    <graphics x="1190.0" z="0.0" y="895.0"/>
  </node>
  <node id="28560" label="P35438" cy:nodeId="675">
    <graphics x="1660.5" z="0.0" y="1460.0"/>
  </node>
  <node id="28559" label="P12382" cy:nodeId="676">
    <graphics x="1468.0" z="0.0" y="954.0"/>
  </node>
  <node id="28558" label="P68510" cy:nodeId="677">
    <graphics x="1103.5" z="0.0" y="1362.0"/>
  </node>
  <node id="28557" label="Q03265" cy:nodeId="678">
    <graphics x="936.0" z="0.0" y="1097.0"/>
  </node>
  <node id="28556" label="O09111" cy:nodeId="679">
    <graphics x="612.0" z="0.0" y="955.0"/>
  </node>
  <node id="28555" label="Q9D3D9" cy:nodeId="680">
    <graphics x="681.0" z="0.0" y="1143.0"/>
  </node>
  <node id="28554" label="Q9D051" cy:nodeId="681">
    <graphics x="1026.0" z="0.0" y="885.0"/>
  </node>
  <node id="28553" label="O08749" cy:nodeId="682">
    <graphics x="923.0" z="0.0" y="794.0"/>
  </node>
  <node id="28552" label="Q9D6J6" cy:nodeId="683">
    <graphics x="780.0" z="0.0" y="1070.0"/>
  </node>
  <node id="28551" label="Q9CQZ5" cy:nodeId="684">
    <graphics x="585.0" z="0.0" y="1061.0"/>
  </node>
  <node id="28550" label="Q80Z38" cy:nodeId="685">
    <graphics x="1825.0" z="0.0" y="1797.0"/>
  </node>
  <node id="28549" label="Q01097" cy:nodeId="686">
    <graphics x="1544.5" z="0.0" y="1372.0"/>
  </node>
</graph>
