# Supplementary material for: APP Is a Context-Sensitive Regulator of the Hippocampal Presynaptic Active Zone
Source: PLOS journal article supplement (doi:10.1371/journal.pcbi.1004832), 2016-04-19
Supplement: S6 (10.1371/journal.pcbi.1004832.s006) [file journal.pcbi.1004832.s006.cys › CytoscapeSession-2016_01_22-10_07/views/4132-16293-Subcommunities.xgmml]

<?xml version="1.0" encoding="UTF-8" standalone="yes"?>
<graph id="16293" label="Subcommunities" cy:view="1" cy:networkId="4132" cy:visualStyle="Localization" cy:rendererId="org.cytoscape.ding" cy:documentVersion="3.0" xmlns:dc="http://purl.org/dc/elements/1.1/" xmlns:xlink="http://www.w3.org/1999/xlink" xmlns:rdf="http://www.w3.org/1999/02/22-rdf-syntax-ns#" xmlns:cy="http://www.cytoscape.org" xmlns="http://www.cs.rpi.edu/XGMML">
  <graphics>
    <att name="NETWORK_NODE_SELECTION" value="true" type="string"/>
    <att name="NETWORK_CENTER_X_LOCATION" value="1609.2002621574707" type="string"/>
    <att name="NETWORK_WIDTH" value="606.0" type="string"/>
    <att name="NETWORK_CENTER_Z_LOCATION" value="0.0" type="string"/>
    <att name="NETWORK_CENTER_Y_LOCATION" value="-1329.3756081089236" type="string"/>
    <att name="NETWORK_TITLE" value="Subcommunities" type="string"/>
    <att name="NETWORK_EDGE_SELECTION" value="true" type="string"/>
    <att name="NETWORK_DEPTH" value="0.0" type="string"/>
    <att name="NETWORK_SCALE_FACTOR" value="0.08130258532583245" type="string"/>
    <att name="NETWORK_HEIGHT" value="702.0" type="string"/>
  </graphics>
  <node id="16909" label="Q01097" cy:nodeId="4142">
    <graphics x="-1238.343017578125" z="0.0" y="-1064.7491455078125"/>
  </node>
  <node id="16908" label="Q80Z38" cy:nodeId="4143">
    <graphics x="-1241.4013671875" z="0.0" y="-1019.060546875"/>
  </node>
  <node id="16907" label="Q9CQZ5" cy:nodeId="4144">
    <graphics x="4980.53857421875" z="0.0" y="-2418.941307740575"/>
  </node>
  <node id="16906" label="Q9D6J6" cy:nodeId="4145">
    <graphics x="4975.34765625" z="0.0" y="-2364.5831534437"/>
  </node>
  <node id="16905" label="O08749" cy:nodeId="4146">
    <graphics x="1973.0115217311504" z="0.0" y="-2033.886962890625"/>
  </node>
  <node id="16904" label="Q9D051" cy:nodeId="4147">
    <graphics x="1965.6030744655254" z="0.0" y="-1972.87353515625"/>
  </node>
  <node id="16903" label="Q9D3D9" cy:nodeId="4148">
    <graphics x="5242.2890625" z="0.0" y="-1614.4172598890127"/>
  </node>
  <node id="16902" label="O09111" cy:nodeId="4149">
    <graphics x="4959.9638671875" z="0.0" y="-2312.1895987562"/>
  </node>
  <node id="16901" label="Q03265" cy:nodeId="4150">
    <graphics x="5236.3046875" z="0.0" y="-1557.4782950452627"/>
  </node>
  <node id="16900" label="P68510" cy:nodeId="4151">
    <graphics x="-1738.22368101226" z="0.0" y="-1555.1782708560102"/>
  </node>
  <node id="16899" label="P12382" cy:nodeId="4152">
    <graphics x="1810.7026838405254" z="0.0" y="-2754.09033203125"/>
  </node>
  <node id="16898" label="P35438" cy:nodeId="4153">
    <graphics x="-1250.522216796875" z="0.0" y="-974.1873779296875"/>
  </node>
  <node id="16897" label="P05202" cy:nodeId="4154">
    <graphics x="1943.8083967311504" z="0.0" y="-1915.405517578125"/>
  </node>
  <node id="16896" label="Q9QUI0" cy:nodeId="4155">
    <graphics x="-735.1395832107328" z="0.0" y="-2155.7992069107704"/>
  </node>
  <node id="16895" label="Q06335" cy:nodeId="4156">
    <graphics x="-2175.4691204025485" z="0.0" y="-1728.8858726410344"/>
  </node>
  <node id="16894" label="P23819" cy:nodeId="4157">
    <graphics x="-1035.9132038162015" z="0.0" y="-3165.6259765625"/>
  </node>
  <node id="16893" label="P35436" cy:nodeId="4158">
    <graphics x="-1265.542724609375" z="0.0" y="-930.9302978515625"/>
  </node>
  <node id="16892" label="Q9CZU6" cy:nodeId="4159">
    <graphics x="1908.893968020213" z="0.0" y="-1864.823486328125"/>
  </node>
  <node id="16891" label="Q9DCD0" cy:nodeId="4160">
    <graphics x="1802.8484357936504" z="0.0" y="-2691.91796875"/>
  </node>
  <node id="16890" label="P51863" cy:nodeId="4161">
    <graphics x="1717.6167249125747" z="0.0" y="-4891.90547045635"/>
  </node>
  <node id="16889" label="Q9Z1G3" cy:nodeId="4162">
    <graphics x="1696.9670667094497" z="0.0" y="-4808.1266618626"/>
  </node>
  <node id="16888" label="P62259" cy:nodeId="4163">
    <graphics x="-1755.9606194888224" z="0.0" y="-3017.2053191238"/>
  </node>
  <node id="16887" label="P47757" cy:nodeId="4164">
    <graphics x="-1170.7236328125" z="0.0" y="-1722.559326171875"/>
  </node>
  <node id="16886" label="Q8C8R3" cy:nodeId="4165">
    <graphics x="-2179.5125774337985" z="0.0" y="-1678.7974937347844"/>
  </node>
  <node id="16885" label="P16546" cy:nodeId="4166">
    <graphics x="-2191.5384563400485" z="0.0" y="-1630.0062339691594"/>
  </node>
  <node id="16884" label="P63330" cy:nodeId="4167">
    <graphics x="-1684.4807254654581" z="0.0" y="-2079.0140422775485"/>
  </node>
  <node id="16883" label="Q76MZ3" cy:nodeId="4168">
    <graphics x="-1696.2895633560831" z="0.0" y="-2008.2471965744235"/>
  </node>
  <node id="16882" label="Q9CQZ6" cy:nodeId="4169">
    <graphics x="4934.94189453125" z="0.0" y="-2263.65395422495"/>
  </node>
  <node id="16881" label="Q9CQ54" cy:nodeId="4170">
    <graphics x="4901.18701171875" z="0.0" y="-2220.73110266245"/>
  </node>
  <node id="16880" label="Q9DCT2" cy:nodeId="4171">
    <graphics x="4573.3515625" z="0.0" y="-1830.3702628187002"/>
  </node>
  <node id="16879" label="Q9CQ69" cy:nodeId="4172">
    <graphics x="4859.9189453125" z="0.0" y="-2184.97231359995"/>
  </node>
  <node id="16878" label="P08249" cy:nodeId="4173">
    <graphics x="1862.8894514186504" z="0.0" y="-1824.066650390625"/>
  </node>
  <node id="16877" label="Q9D6R2" cy:nodeId="4174">
    <graphics x="1808.4675764186504" z="0.0" y="-1795.503662109375"/>
  </node>
  <node id="16876" label="P54071" cy:nodeId="4175">
    <graphics x="1748.7917951686504" z="0.0" y="-1780.795166015625"/>
  </node>
  <node id="16875" label="P06151" cy:nodeId="4176">
    <graphics x="1218.3042463405254" z="0.0" y="-2460.227294921875"/>
  </node>
  <node id="16874" label="Q9DB20" cy:nodeId="4177">
    <graphics x="4561.54296875" z="0.0" y="-1759.6036612562002"/>
  </node>
  <node id="16873" label="Q9CQH3" cy:nodeId="4178">
    <graphics x="4812.62890625" z="0.0" y="-2157.669335084325"/>
  </node>
  <node id="16872" label="Q3UHD9" cy:nodeId="4179">
    <graphics x="-1459.4367450491575" z="0.0" y="-2549.842481097115"/>
  </node>
  <node id="16871" label="Q9Z2H5" cy:nodeId="4180">
    <graphics x="-1476.1784442679075" z="0.0" y="-2471.078320940865"/>
  </node>
  <node id="16870" label="Q6P9K8" cy:nodeId="4181">
    <graphics x="-1523.5092548147825" z="0.0" y="-2405.93305726899"/>
  </node>
  <node id="16869" label="O88952" cy:nodeId="4182">
    <graphics x="-1593.2450946585325" z="0.0" y="-2365.671094378365"/>
  </node>
  <node id="16868" label="P19783" cy:nodeId="4183">
    <graphics x="5218.61279296875" z="0.0" y="-1503.0278555921377"/>
  </node>
  <node id="16867" label="Q8BK64" cy:nodeId="4184">
    <graphics x="508.6176383069815" z="0.0" y="555.40283203125"/>
  </node>
  <node id="16866" label="P63038" cy:nodeId="4185">
    <graphics x="988.0477530530752" z="0.0" y="600.967529296875"/>
  </node>
  <node id="16865" label="Q8BH95" cy:nodeId="4186">
    <graphics x="3472.918576968625" z="0.0" y="171.9325540194069"/>
  </node>
  <node id="16864" label="Q9CZ13" cy:nodeId="4187">
    <graphics x="4527.39599609375" z="0.0" y="-1696.5057608655752"/>
  </node>
  <node id="16863" label="Q9D0M3" cy:nodeId="4188">
    <graphics x="5189.986328125" z="0.0" y="-1453.4454581312002"/>
  </node>
  <node id="16862" label="Q99LC3" cy:nodeId="4189">
    <graphics x="4761.02685546875" z="0.0" y="-2139.809471803075"/>
  </node>
  <node id="16861" label="Q99LY9" cy:nodeId="4190">
    <graphics x="4706.97705078125" z="0.0" y="-2132.038475709325"/>
  </node>
  <node id="16860" label="Q8BMF4" cy:nodeId="4191">
    <graphics x="1687.3298811061504" z="0.0" y="-1780.795166015625"/>
  </node>
  <node id="16859" label="Q05920" cy:nodeId="4192">
    <graphics x="1627.6538557155254" z="0.0" y="-1795.503662109375"/>
  </node>
  <node id="16858" label="P63085" cy:nodeId="4193">
    <graphics x="-1286.195068359375" z="0.0" y="-890.0612182617188"/>
  </node>
  <node id="16857" label="P61027" cy:nodeId="4194">
    <graphics x="-744.031734089639" z="0.0" y="-2091.1043826920204"/>
  </node>
  <node id="16856" label="Q61598" cy:nodeId="4195">
    <graphics x="-770.0486408279203" z="0.0" y="-2031.2076541763954"/>
  </node>
  <node id="16855" label="P56480" cy:nodeId="4196">
    <graphics x="5151.6767578125" z="0.0" y="-1410.8989493421377"/>
  </node>
  <node id="16854" label="P17742" cy:nodeId="4197">
    <graphics x="1168.4966291530254" z="0.0" y="-2356.80029296875"/>
  </node>
  <node id="16853" label="P68404" cy:nodeId="4198">
    <graphics x="-1312.1103515625" z="0.0" y="-852.3094482421875"/>
  </node>
  <node id="16852" label="P67778" cy:nodeId="4199">
    <graphics x="4474.611328125" z="0.0" y="-1647.9138419202627"/>
  </node>
  <node id="16851" label="Q9JLJ2" cy:nodeId="4200">
    <graphics x="2879.276975406125" z="0.0" y="623.9528787264381"/>
  </node>
  <node id="16850" label="Q91VR2" cy:nodeId="4201">
    <graphics x="5105.3583984375" z="0.0" y="-1377.2463614515127"/>
  </node>
  <node id="16849" label="Q9CPQ8" cy:nodeId="4202">
    <graphics x="4652.43310546875" z="0.0" y="-2134.636620240575"/>
  </node>
  <node id="16848" label="Q91VD9" cy:nodeId="4203">
    <graphics x="4599.3671875" z="0.0" y="-2147.510155396825"/>
  </node>
  <node id="16847" label="Q9DCS9" cy:nodeId="4204">
    <graphics x="4549.6962890625" z="0.0" y="-2170.1944815687"/>
  </node>
  <node id="16846" label="Q9CR68" cy:nodeId="4205">
    <graphics x="5053.0556640625" z="0.0" y="-1353.9597403577627"/>
  </node>
  <node id="16845" label="P52196" cy:nodeId="4206">
    <graphics x="961.7225577405752" z="0.0" y="690.62255859375"/>
  </node>
  <node id="16844" label="P05132" cy:nodeId="4207">
    <graphics x="-1342.82568359375" z="0.0" y="-818.3486938476562"/>
  </node>
  <node id="16843" label="Q9CQJ8" cy:nodeId="4208">
    <graphics x="4505.2158203125" z="0.0" y="-2201.868553834325"/>
  </node>
  <node id="16842" label="Q06185" cy:nodeId="4209">
    <graphics x="4997.05419921875" z="0.0" y="-1342.0561759046377"/>
  </node>
  <node id="16841" label="Q9DC70" cy:nodeId="4210">
    <graphics x="4467.53369140625" z="0.0" y="-2241.388573365575"/>
  </node>
  <node id="16840" label="Q9D0S9" cy:nodeId="4211">
    <graphics x="2847.717893374875" z="0.0" y="261.2484719881569"/>
  </node>
  <node id="16839" label="Q9D1K2" cy:nodeId="4212">
    <graphics x="1639.7485608500747" z="0.0" y="-4743.54023608135"/>
  </node>
  <node id="16838" label="Q9Z1G4" cy:nodeId="4213">
    <graphics x="1559.0693616313247" z="0.0" y="-4712.94257983135"/>
  </node>
  <node id="16837" label="Q9WUM5" cy:nodeId="4214">
    <graphics x="1573.2319807155254" z="0.0" y="-1824.066650390625"/>
  </node>
  <node id="16836" label="Q9D0K2" cy:nodeId="4215">
    <graphics x="3373.319455874875" z="0.0" y="625.1284158358131"/>
  </node>
  <node id="16835" label="Q9CQN1" cy:nodeId="4216">
    <graphics x="891.1051871351065" z="0.0" y="751.8130493164062"/>
  </node>
  <node id="16834" label="P63037" cy:nodeId="4217">
    <graphics x="473.5241324476065" z="0.0" y="651.82080078125"/>
  </node>
  <node id="16833" label="Q9DCW4" cy:nodeId="4218">
    <graphics x="3359.398069156125" z="0.0" y="699.6000955233131"/>
  </node>
  <node id="16832" label="Q9CPP6" cy:nodeId="4219">
    <graphics x="4438.01171875" z="0.0" y="-2287.32582922495"/>
  </node>
  <node id="16831" label="P15105" cy:nodeId="4220">
    <graphics x="2860.749631656125" z="0.0" y="705.1249978670631"/>
  </node>
  <node id="16830" label="P46460" cy:nodeId="4221">
    <graphics x="-1040.6671100662015" z="0.0" y="-3112.80810546875"/>
  </node>
  <node id="16829" label="Q08331" cy:nodeId="4222">
    <graphics x="3319.514768374875" z="0.0" y="764.0141580233131"/>
  </node>
  <node id="16828" label="Q9CQ62" cy:nodeId="4223">
    <graphics x="3259.055295718625" z="0.0" y="809.6708963045631"/>
  </node>
  <node id="16827" label="P62897" cy:nodeId="4224">
    <graphics x="4939.80126953125" z="0.0" y="-1342.0561759046377"/>
  </node>
  <node id="16826" label="Q9D2G2" cy:nodeId="4225">
    <graphics x="1527.227219973338" z="0.0" y="-1864.823486328125"/>
  </node>
  <node id="16825" label="Q3UIU2" cy:nodeId="4226">
    <graphics x="4417.716796875" z="0.0" y="-2338.019921021825"/>
  </node>
  <node id="16824" label="P31938" cy:nodeId="4227">
    <graphics x="-1377.7945556640625" z="0.0" y="-788.784912109375"/>
  </node>
  <node id="16823" label="P17427" cy:nodeId="4228">
    <graphics x="878.2145032328872" z="0.0" y="-4902.9088884251"/>
  </node>
  <node id="16822" label="P17426" cy:nodeId="4229">
    <graphics x="865.4214124125747" z="0.0" y="-4830.35566576885"/>
  </node>
  <node id="16821" label="P57746" cy:nodeId="4230">
    <graphics x="1473.4121350688247" z="0.0" y="-4723.34297045635"/>
  </node>
  <node id="16820" label="P50516" cy:nodeId="4231">
    <graphics x="1745.5296887797622" z="0.0" y="-4232.9518571751"/>
  </node>
  <node id="16819" label="P70404" cy:nodeId="4232">
    <graphics x="1492.312913332713" z="0.0" y="-1915.405517578125"/>
  </node>
  <node id="16818" label="O88441" cy:nodeId="4233">
    <graphics x="3139.673459781125" z="0.0" y="318.8236673006569"/>
  </node>
  <node id="16817" label="Q7TQI3" cy:nodeId="4234">
    <graphics x="-1754.9655023013224" z="0.0" y="-1476.4141106997602"/>
  </node>
  <node id="16816" label="P17751" cy:nodeId="4235">
    <graphics x="1779.7793439967754" z="0.0" y="-2633.652099609375"/>
  </node>
  <node id="16815" label="P09411" cy:nodeId="4236">
    <graphics x="1742.9446271999004" z="0.0" y="-2582.95361328125"/>
  </node>
  <node id="16814" label="Q9Z1P6" cy:nodeId="4237">
    <graphics x="4407.3828125" z="0.0" y="-2391.638573365575"/>
  </node>
  <node id="16813" label="P63137" cy:nodeId="4238">
    <graphics x="-2070.623779296875" z="0.0" y="-1133.1953863705526"/>
  </node>
  <node id="16812" label="P62812" cy:nodeId="4239">
    <graphics x="-2131.861083984375" z="0.0" y="-1027.12934633149"/>
  </node>
  <node id="16811" label="O70325" cy:nodeId="4240">
    <graphics x="4408.9091796875" z="0.0" y="-1619.0942618421377"/>
  </node>
  <node id="16810" label="P48771" cy:nodeId="4241">
    <graphics x="4337.4091796875" z="0.0" y="-1613.1694571546377"/>
  </node>
  <node id="16809" label="Q64133" cy:nodeId="4242">
    <graphics x="2808.838987124875" z="0.0" y="770.2202127108131"/>
  </node>
  <node id="16808" label="P47738" cy:nodeId="4243">
    <graphics x="2733.823850406125" z="0.0" y="806.3452127108131"/>
  </node>
  <node id="16807" label="P63005" cy:nodeId="4244">
    <graphics x="-1730.4365360123331" z="0.0" y="-1945.149906535361"/>
  </node>
  <node id="16806" label="Q6PER3" cy:nodeId="4245">
    <graphics x="-1783.2210819107706" z="0.0" y="-1896.5582317306735"/>
  </node>
  <node id="16805" label="O70161" cy:nodeId="4246">
    <graphics x="1283.3541516703872" z="0.0" y="-3787.9193864719746"/>
  </node>
  <node id="16804" label="Q9Z1B3" cy:nodeId="4247">
    <graphics x="1248.2610120219497" z="0.0" y="-3691.5009294407246"/>
  </node>
  <node id="16803" label="Q921G7" cy:nodeId="4248">
    <graphics x="3186.185666812375" z="0.0" y="830.4042947420631"/>
  </node>
  <node id="16802" label="Q8BWT1" cy:nodeId="4249">
    <graphics x="3110.747190249875" z="0.0" y="823.4138162264381"/>
  </node>
  <node id="16801" label="Q9CQA3" cy:nodeId="4250">
    <graphics x="4883.7998046875" z="0.0" y="-1353.9597403577627"/>
  </node>
  <node id="16800" label="P12787" cy:nodeId="4251">
    <graphics x="4831.4970703125" z="0.0" y="-1377.2463614515127"/>
  </node>
  <node id="16799" label="Q61425" cy:nodeId="4252">
    <graphics x="3042.927854312375" z="0.0" y="789.6437966951881"/>
  </node>
  <node id="16798" label="Q99LC5" cy:nodeId="4253">
    <graphics x="2991.887326968625" z="0.0" y="733.6550271639381"/>
  </node>
  <node id="16797" label="Q8BGH2" cy:nodeId="4254">
    <graphics x="2037.4451154811504" z="0.0" y="-2469.15478515625"/>
  </node>
  <node id="16796" label="Q99LX0" cy:nodeId="4255">
    <graphics x="4267.859375" z="0.0" y="-1630.7820059827627"/>
  </node>
  <node id="16795" label="P62331" cy:nodeId="4256">
    <graphics x="1159.4010266703872" z="0.0" y="-3640.1981950657246"/>
  </node>
  <node id="16794" label="Q8K1Z0" cy:nodeId="4257">
    <graphics x="4407.3828125" z="0.0" y="-2446.244042115575"/>
  </node>
  <node id="16793" label="P11499" cy:nodeId="4258">
    <graphics x="384.66481848276277" z="0.0" y="703.1240234375"/>
  </node>
  <node id="16792" label="P05064" cy:nodeId="4259">
    <graphics x="1694.6592268092754" z="0.0" y="-2543.0087890625"/>
  </node>
  <node id="16791" label="P17710" cy:nodeId="4260">
    <graphics x="1637.956712160838" z="0.0" y="-2516.326171875"/>
  </node>
  <node id="16790" label="P48320" cy:nodeId="4261">
    <graphics x="2650.564084781125" z="0.0" y="806.3452127108131"/>
  </node>
  <node id="16789" label="P61922" cy:nodeId="4262">
    <graphics x="2575.549924624875" z="0.0" y="770.2202127108131"/>
  </node>
  <node id="16788" label="P12023" cy:nodeId="4263">
    <graphics x="-2211.2359661056735" z="0.0" y="-1583.776131430097"/>
  </node>
  <node id="16787" label="P62814" cy:nodeId="4264">
    <graphics x="1402.3998059672622" z="0.0" y="-4772.35957201885"/>
  </node>
  <node id="16786" label="Q9WV92" cy:nodeId="4265">
    <graphics x="-1673.3276141897825" z="0.0" y="-2357.254102190865"/>
  </node>
  <node id="16785" label="Q8R5M8" cy:nodeId="4266">
    <graphics x="-1749.9103778616575" z="0.0" y="-2382.137402972115"/>
  </node>
  <node id="16784" label="O35526" cy:nodeId="4267">
    <graphics x="-1054.7752643630765" z="0.0" y="-3061.687744140625"/>
  </node>
  <node id="16783" label="Q9WV18" cy:nodeId="4268">
    <graphics x="-2238.0936321212985" z="0.0" y="-1541.304207601972"/>
  </node>
  <node id="16782" label="P56391" cy:nodeId="4269">
    <graphics x="4785.1787109375" z="0.0" y="-1410.8989493421377"/>
  </node>
  <node id="16781" label="Q9D172" cy:nodeId="4270">
    <graphics x="4417.716796875" z="0.0" y="-2499.86293859995"/>
  </node>
  <node id="16780" label="Q62442" cy:nodeId="4271">
    <graphics x="-1077.7847858474515" z="0.0" y="-3013.908203125"/>
  </node>
  <node id="16779" label="P26443" cy:nodeId="4272">
    <graphics x="1470.518235598338" z="0.0" y="-1972.87353515625"/>
  </node>
  <node id="16778" label="Q91Z53" cy:nodeId="4273">
    <graphics x="2770.463010562375" z="0.0" y="367.5797708162819"/>
  </node>
  <node id="16777" label="Q99KJ8" cy:nodeId="4274">
    <graphics x="-1848.9232303482706" z="0.0" y="-1867.738529582236"/>
  </node>
  <node id="16776" label="O08788" cy:nodeId="4275">
    <graphics x="-1920.4229862076456" z="0.0" y="-1861.813969035361"/>
  </node>
  <node id="16775" label="Q99KI0" cy:nodeId="4276">
    <graphics x="1463.109788332713" z="0.0" y="-2033.886962890625"/>
  </node>
  <node id="16774" label="Q9ERS2" cy:nodeId="4277">
    <graphics x="4438.01171875" z="0.0" y="-2550.557030396825"/>
  </node>
  <node id="16773" label="P97807" cy:nodeId="4278">
    <graphics x="1470.518235598338" z="0.0" y="-2094.901123046875"/>
  </node>
  <node id="16772" label="Q6PHZ2" cy:nodeId="4279">
    <graphics x="-1416.391357421875" z="0.0" y="-764.145751953125"/>
  </node>
  <node id="16771" label="P60710" cy:nodeId="4280">
    <graphics x="-2283.597764058761" z="0.0" y="-2387.894014445647"/>
  </node>
  <node id="16770" label="Q02248" cy:nodeId="4281">
    <graphics x="-1179.070068359375" z="0.0" y="-1659.1619873046875"/>
  </node>
  <node id="16769" label="P05480" cy:nodeId="4282">
    <graphics x="-1203.54052734375" z="0.0" y="-1600.0859375"/>
  </node>
  <node id="16768" label="P51881" cy:nodeId="4283">
    <graphics x="-1242.46728515625" z="0.0" y="-1549.354248046875"/>
  </node>
  <node id="16767" label="Q91WD5" cy:nodeId="4284">
    <graphics x="4467.53369140625" z="0.0" y="-2596.494042115575"/>
  </node>
  <node id="16766" label="Q8K2B3" cy:nodeId="4285">
    <graphics x="1492.312913332713" z="0.0" y="-2152.368408203125"/>
  </node>
  <node id="16765" label="P68369" cy:nodeId="4286">
    <graphics x="-1108.9556842849515" z="0.0" y="-2971.005126953125"/>
  </node>
  <node id="16764" label="Q8VEM8" cy:nodeId="4287">
    <graphics x="4746.869140625" z="0.0" y="-1453.4454581312002"/>
  </node>
  <node id="16763" label="Q3ULD5" cy:nodeId="4288">
    <graphics x="3431.497190249875" z="0.0" y="271.9323098787819"/>
  </node>
  <node id="16762" label="Q8R4N0" cy:nodeId="4289">
    <graphics x="3331.497190249875" z="0.0" y="313.3539407381569"/>
  </node>
  <node id="16761" label="P52503" cy:nodeId="4290">
    <graphics x="4207.796875" z="0.0" y="-1670.0227286390127"/>
  </node>
  <node id="16760" label="Q60631" cy:nodeId="4291">
    <graphics x="1006.8775891703872" z="0.0" y="-4248.0866228001"/>
  </node>
  <node id="16759" label="Q62277" cy:nodeId="4292">
    <graphics x="1218.1556653422622" z="0.0" y="-4614.3610368626"/>
  </node>
  <node id="16758" label="P62073" cy:nodeId="4293">
    <graphics x="4163.72998046875" z="0.0" y="-1726.6397940687002"/>
  </node>
  <node id="16757" label="P99029" cy:nodeId="4294">
    <graphics x="4140.4345703125" z="0.0" y="-1794.4977042249502"/>
  </node>
  <node id="16756" label="Q9CQV8" cy:nodeId="4295">
    <graphics x="-2271.4163860275485" z="0.0" y="-1503.690438070722"/>
  </node>
  <node id="16755" label="Q9CQR4" cy:nodeId="4296">
    <graphics x="4505.2158203125" z="0.0" y="-2636.014061646825"/>
  </node>
  <node id="16754" label="P40142" cy:nodeId="4297">
    <graphics x="1576.4001936061504" z="0.0" y="-2504.58349609375"/>
  </node>
  <node id="16753" label="P63213" cy:nodeId="4298">
    <graphics x="-1147.2864948318265" z="0.0" y="-2934.357177734375"/>
  </node>
  <node id="16752" label="P62874" cy:nodeId="4299">
    <graphics x="-1191.5450397537015" z="0.0" y="-2905.142333984375"/>
  </node>
  <node id="16751" label="Q9EQ20" cy:nodeId="4300">
    <graphics x="2523.638791812375" z="0.0" y="705.1249978670631"/>
  </node>
  <node id="16750" label="Q99KR7" cy:nodeId="4301">
    <graphics x="4718.24267578125" z="0.0" y="-1503.0278555921377"/>
  </node>
  <node id="16749" label="O35658" cy:nodeId="4302">
    <graphics x="4700.55078125" z="0.0" y="-1557.4782950452627"/>
  </node>
  <node id="16748" label="Q7TMF3" cy:nodeId="4303">
    <graphics x="4549.6962890625" z="0.0" y="-2667.688378053075"/>
  </node>
  <node id="16747" label="Q9DCX2" cy:nodeId="4304">
    <graphics x="4694.56640625" z="0.0" y="-1614.4172598890127"/>
  </node>
  <node id="16746" label="Q61735" cy:nodeId="4305">
    <graphics x="-811.260737995889" z="0.0" y="-1980.5514041763954"/>
  </node>
  <node id="16745" label="P97797" cy:nodeId="4306">
    <graphics x="-864.6115070388578" z="0.0" y="-1942.8922244888954"/>
  </node>
  <node id="16744" label="P50518" cy:nodeId="4307">
    <graphics x="1362.3004407328872" z="0.0" y="-4848.7624040501"/>
  </node>
  <node id="16743" label="Q8BVE3" cy:nodeId="4308">
    <graphics x="1362.3004407328872" z="0.0" y="-4935.04902514385"/>
  </node>
  <node id="16742" label="Q9JLB0" cy:nodeId="4309">
    <graphics x="-1809.751564385095" z="0.0" y="-2436.018262347115"/>
  </node>
  <node id="16741" label="Q99N28" cy:nodeId="4310">
    <graphics x="-1842.503517510095" z="0.0" y="-2509.580762347115"/>
  </node>
  <node id="16740" label="P19536" cy:nodeId="4311">
    <graphics x="4700.55078125" z="0.0" y="-1671.3562247327627"/>
  </node>
  <node id="16739" label="Q60864" cy:nodeId="4312">
    <graphics x="283.61769934213777" z="0.0" y="685.306396484375"/>
  </node>
  <node id="16738" label="Q9QYJ0" cy:nodeId="4313">
    <graphics x="931.7733389905752" z="0.0" y="157.752197265625"/>
  </node>
  <node id="16737" label="Q68FD5" cy:nodeId="4314">
    <graphics x="828.5853528422622" z="0.0" y="-4766.55293139385"/>
  </node>
  <node id="16736" label="Q9R0Q6" cy:nodeId="4315">
    <graphics x="-2297.518906636886" z="0.0" y="-2313.422334758147"/>
  </node>
  <node id="16735" label="Q9JM76" cy:nodeId="4316">
    <graphics x="-2337.402451558761" z="0.0" y="-2249.008272258147"/>
  </node>
  <node id="16734" label="Q91YT0" cy:nodeId="4317">
    <graphics x="4599.3671875" z="0.0" y="-2690.3722159437"/>
  </node>
  <node id="16733" label="Q9DCJ5" cy:nodeId="4318">
    <graphics x="4652.43310546875" z="0.0" y="-2703.245995240575"/>
  </node>
  <node id="16732" label="P60879" cy:nodeId="4319">
    <graphics x="-1240.308833699014" z="0.0" y="-2884.299560546875"/>
  </node>
  <node id="16731" label="P28660" cy:nodeId="4320">
    <graphics x="1736.6375989360122" z="0.0" y="-4168.2575212376"/>
  </node>
  <node id="16730" label="O08756" cy:nodeId="4321">
    <graphics x="2964.518674624875" z="0.0" y="663.0092752108131"/>
  </node>
  <node id="16729" label="Q99JY0" cy:nodeId="4322">
    <graphics x="2964.518674624875" z="0.0" y="587.2473123201881"/>
  </node>
  <node id="16728" label="P04925" cy:nodeId="4323">
    <graphics x="-2310.3411907150485" z="0.0" y="-1471.909188070722"/>
  </node>
  <node id="16727" label="P39688" cy:nodeId="4324">
    <graphics x="-1293.1981201171875" z="0.0" y="-1510.42822265625"/>
  </node>
  <node id="16726" label="P49615" cy:nodeId="4325">
    <graphics x="-1352.275146484375" z="0.0" y="-1485.957763671875"/>
  </node>
  <node id="16725" label="P03930" cy:nodeId="4326">
    <graphics x="4718.24267578125" z="0.0" y="-1725.8066641858877"/>
  </node>
  <node id="16724" label="Q9CQ75" cy:nodeId="4327">
    <graphics x="4706.97705078125" z="0.0" y="-2705.844139771825"/>
  </node>
  <node id="16723" label="P18872" cy:nodeId="4328">
    <graphics x="-1292.010493855264" z="0.0" y="-2872.4990234375"/>
  </node>
  <node id="16722" label="Q8VDD5" cy:nodeId="4329">
    <graphics x="-1457.9276123046875" z="0.0" y="-744.870849609375"/>
  </node>
  <node id="16721" label="P51174" cy:nodeId="4330">
    <graphics x="2955.942502749875" z="0.0" y="-85.64271377234115"/>
  </node>
  <node id="16720" label="Q8JZQ2" cy:nodeId="4331">
    <graphics x="870.535973267919" z="0.0" y="263.81805419921875"/>
  </node>
  <node id="16719" label="Q8JZN5" cy:nodeId="4332">
    <graphics x="2991.887326968625" z="0.0" y="516.6015603670631"/>
  </node>
  <node id="16718" label="Q60676" cy:nodeId="4333">
    <graphics x="-1501.66259765625" z="0.0" y="-731.30419921875"/>
  </node>
  <node id="16717" label="Q9CXZ1" cy:nodeId="4334">
    <graphics x="4761.02685546875" z="0.0" y="-2698.073143678075"/>
  </node>
  <node id="16716" label="Q8BG51" cy:nodeId="4335">
    <graphics x="-926.1442218826078" z="0.0" y="-1921.0235721451454"/>
  </node>
  <node id="16715" label="P63001" cy:nodeId="4336">
    <graphics x="-991.2952228591703" z="0.0" y="-1916.567151246708"/>
  </node>
  <node id="16714" label="Q62351" cy:nodeId="4337">
    <graphics x="772.1488294047622" z="0.0" y="-4719.1969743626"/>
  </node>
  <node id="16713" label="P63044" cy:nodeId="4338">
    <graphics x="-1344.9883991287015" z="0.0" y="-2870.119873046875"/>
  </node>
  <node id="16712" label="P46660" cy:nodeId="4339">
    <graphics x="-1761.9449944888224" z="0.0" y="-2960.26635428005"/>
  </node>
  <node id="16711" label="Q9JHU4" cy:nodeId="4340">
    <graphics x="-1989.9730350357706" z="0.0" y="-1879.426273722861"/>
  </node>
  <node id="16710" label="Q9D855" cy:nodeId="4341">
    <graphics x="4746.869140625" z="0.0" y="-1775.3890616468252"/>
  </node>
  <node id="16709" label="Q8K3J1" cy:nodeId="4342">
    <graphics x="4812.62890625" z="0.0" y="-2680.213280396825"/>
  </node>
  <node id="16708" label="Q9DB77" cy:nodeId="4343">
    <graphics x="4785.1787109375" z="0.0" y="-1817.9356925062002"/>
  </node>
  <node id="16707" label="Q91VM9" cy:nodeId="4344">
    <graphics x="1402.3998059672622" z="0.0" y="-5011.4518571751"/>
  </node>
  <node id="16706" label="Q9DC69" cy:nodeId="4345">
    <graphics x="4140.4345703125" z="0.0" y="-1866.2423331312002"/>
  </node>
  <node id="16705" label="Q9JJV2" cy:nodeId="4346">
    <graphics x="-1779.6373773013224" z="0.0" y="-2905.815914826925"/>
  </node>
  <node id="16704" label="Q9CQQ7" cy:nodeId="4347">
    <graphics x="4831.4970703125" z="0.0" y="-1851.5880362562002"/>
  </node>
  <node id="16703" label="O88696" cy:nodeId="4348">
    <graphics x="4163.72998046875" z="0.0" y="-1934.1014639905752"/>
  </node>
  <node id="16702" label="O35129" cy:nodeId="4349">
    <graphics x="4207.796875" z="0.0" y="-1990.7180411390127"/>
  </node>
  <node id="16701" label="Q9CZS1" cy:nodeId="4350">
    <graphics x="2505.110959781125" z="0.0" y="623.9528787264381"/>
  </node>
  <node id="16700" label="P70232" cy:nodeId="4351">
    <graphics x="-1415.672607421875" z="0.0" y="-1477.611083984375"/>
  </node>
  <node id="16699" label="P18052" cy:nodeId="4352">
    <graphics x="-1479.070068359375" z="0.0" y="-1485.957763671875"/>
  </node>
  <node id="16698" label="P56379" cy:nodeId="4353">
    <graphics x="4267.859375" z="0.0" y="-2029.9591300062002"/>
  </node>
  <node id="16697" label="Q9D023" cy:nodeId="4354">
    <graphics x="4859.9189453125" z="0.0" y="-2652.910546021825"/>
  </node>
  <node id="16696" label="P12367" cy:nodeId="4355">
    <graphics x="-1546.8155517578125" z="0.0" y="-723.6878051757812"/>
  </node>
  <node id="16695" label="Q61548" cy:nodeId="4356">
    <graphics x="702.9189710063247" z="0.0" y="-4693.9997087376"/>
  </node>
  <node id="16694" label="P45878" cy:nodeId="4357">
    <graphics x="1473.4121350688247" z="0.0" y="-5060.4684587376"/>
  </node>
  <node id="16693" label="P63017" cy:nodeId="4358">
    <graphics x="217.66359777963777" z="0.0" y="606.70556640625"/>
  </node>
  <node id="16692" label="Q9D898" cy:nodeId="4359">
    <graphics x="-2397.861680074386" z="0.0" y="-2203.351533976897"/>
  </node>
  <node id="16691" label="Q80T41" cy:nodeId="4360">
    <graphics x="-2353.8602336837985" z="0.0" y="-1446.783455648847"/>
  </node>
  <node id="16690" label="Q9R0K7" cy:nodeId="4361">
    <graphics x="-2400.8460735275485" z="0.0" y="-1428.964119711347"/>
  </node>
  <node id="16689" label="P13707" cy:nodeId="4362">
    <graphics x="1230.1099104030254" z="0.0" y="-2024.641845703125"/>
  </node>
  <node id="16688" label="Q64521" cy:nodeId="4363">
    <graphics x="1152.8557600124004" z="0.0" y="-1918.310302734375"/>
  </node>
  <node id="16687" label="Q9QUH0" cy:nodeId="4364">
    <graphics x="4337.4091796875" z="0.0" y="-2047.5714346937002"/>
  </node>
  <node id="16686" label="P20108" cy:nodeId="4365">
    <graphics x="4408.9091796875" z="0.0" y="-2041.6468741468252"/>
  </node>
  <node id="16685" label="Q9JLM8" cy:nodeId="4366">
    <graphics x="1710.6208753031997" z="0.0" y="-4108.360304440725"/>
  </node>
  <node id="16684" label="Q64010" cy:nodeId="4367">
    <graphics x="-1808.2633538638224" z="0.0" y="-2856.2336394363"/>
  </node>
  <node id="16683" label="P97450" cy:nodeId="4368">
    <graphics x="4883.7998046875" z="0.0" y="-1874.8746573499502"/>
  </node>
  <node id="16682" label="O88935" cy:nodeId="4369">
    <graphics x="-1846.5729241763224" z="0.0" y="-2813.6867644363"/>
  </node>
  <node id="16681" label="P62823" cy:nodeId="4370">
    <graphics x="-2450.0816692306735" z="0.0" y="-1418.912606039472"/>
  </node>
  <node id="16680" label="Q99PT1" cy:nodeId="4371">
    <graphics x="-1055.2325397537015" z="0.0" y="-1929.8534061295204"/>
  </node>
  <node id="16679" label="Q99MN9" cy:nodeId="4372">
    <graphics x="3231.497190249875" z="0.0" y="271.9323098787819"/>
  </node>
  <node id="16678" label="Q99JY9" cy:nodeId="4373">
    <graphics x="-2470.731308980636" z="0.0" y="-2182.618379680022"/>
  </node>
  <node id="16677" label="P14094" cy:nodeId="4374">
    <graphics x="-2546.170029683761" z="0.0" y="-2189.608858195647"/>
  </node>
  <node id="16676" label="P47754" cy:nodeId="4375">
    <graphics x="-1538.1470947265625" z="0.0" y="-1510.42822265625"/>
  </node>
  <node id="16675" label="Q9CZT8" cy:nodeId="4376">
    <graphics x="-2500.2921184494235" z="0.0" y="-1416.889168539472"/>
  </node>
  <node id="16674" label="P35486" cy:nodeId="4377">
    <graphics x="1527.227219973338" z="0.0" y="-2202.950439453125"/>
  </node>
  <node id="16673" label="P22315" cy:nodeId="4378">
    <graphics x="798.6162344983877" z="0.0" y="765.1109008789062"/>
  </node>
  <node id="16672" label="Q61102" cy:nodeId="4379">
    <graphics x="713.6201407483877" z="0.0" y="726.294677734375"/>
  </node>
  <node id="16671" label="P62962" cy:nodeId="4380">
    <graphics x="-2613.989121480636" z="0.0" y="-2223.378633586272"/>
  </node>
  <node id="16670" label="P16054" cy:nodeId="4381">
    <graphics x="-1588.877685546875" z="0.0" y="-1549.354248046875"/>
  </node>
  <node id="16669" label="P09671" cy:nodeId="4382">
    <graphics x="4474.611328125" z="0.0" y="-2012.8270499280752"/>
  </node>
  <node id="16668" label="P18572" cy:nodeId="4383">
    <graphics x="-2050.0355350357704" z="0.0" y="-1918.6671184494235"/>
  </node>
  <node id="16667" label="O35465" cy:nodeId="4384">
    <graphics x="-2094.1016971451454" z="0.0" y="-1975.2840618087985"/>
  </node>
  <node id="16666" label="Q8BPN8" cy:nodeId="4385">
    <graphics x="1669.4087171000747" z="0.0" y="-4057.7038103000996"/>
  </node>
  <node id="16665" label="P63082" cy:nodeId="4386">
    <graphics x="1559.0693616313247" z="0.0" y="-5070.8688493626"/>
  </node>
  <node id="16664" label="Q9CQ92" cy:nodeId="4387">
    <graphics x="997.3775891703872" z="0.0" y="-4182.0133806126"/>
  </node>
  <node id="16663" label="Q8K1M6" cy:nodeId="4388">
    <graphics x="1056.580003176463" z="0.0" y="-2331.256103515625"/>
  </node>
  <node id="16662" label="Q9DBL1" cy:nodeId="4389">
    <graphics x="3042.927854312375" z="0.0" y="460.61279083581314"/>
  </node>
  <node id="16661" label="P53395" cy:nodeId="4390">
    <graphics x="1573.2319807155254" z="0.0" y="-2243.70751953125"/>
  </node>
  <node id="16660" label="Q9JHI5" cy:nodeId="4391">
    <graphics x="3190.075803531125" z="0.0" y="171.9325540194069"/>
  </node>
  <node id="16659" label="Q93092" cy:nodeId="4392">
    <graphics x="1513.8572248561504" z="0.0" y="-2508.518310546875"/>
  </node>
  <node id="16658" label="P52480" cy:nodeId="4393">
    <graphics x="1454.257737551463" z="0.0" y="-2527.8837890625"/>
  </node>
  <node id="16657" label="Q9DB05" cy:nodeId="4394">
    <graphics x="-1397.5399128005765" z="0.0" y="-2877.23828125"/>
  </node>
  <node id="16656" label="Q61301" cy:nodeId="4395">
    <graphics x="-1627.8046875" z="0.0" y="-1600.0859375"/>
  </node>
  <node id="16655" label="Q9Z2I9" cy:nodeId="4396">
    <graphics x="1627.6538557155254" z="0.0" y="-2272.2705078125"/>
  </node>
  <node id="16654" label="P50544" cy:nodeId="4397">
    <graphics x="2878.688596499875" z="0.0" y="20.688710940793612"/>
  </node>
  <node id="16653" label="Q61831" cy:nodeId="4398">
    <graphics x="-1592.5806884765625" z="0.0" y="-722.15771484375"/>
  </node>
  <node id="16652" label="P63040" cy:nodeId="4399">
    <graphics x="-1447.9757038162015" z="0.0" y="-2893.6259765625"/>
  </node>
  <node id="16651" label="Q923T9" cy:nodeId="4400">
    <graphics x="-1638.141357421875" z="0.0" y="-726.7412109375"/>
  </node>
  <node id="16650" label="Q920I9" cy:nodeId="4401">
    <graphics x="1616.0578870219497" z="0.0" y="-4020.0446306125996"/>
  </node>
  <node id="16649" label="P06745" cy:nodeId="4402">
    <graphics x="1401.3464826686504" z="0.0" y="-2561.46240234375"/>
  </node>
  <node id="16648" label="Q3UTJ2" cy:nodeId="4403">
    <graphics x="855.4469251078872" z="0.0" y="-3678.1686540500996"/>
  </node>
  <node id="16647" label="Q7TPR4" cy:nodeId="4404">
    <graphics x="778.1926526469497" z="0.0" y="-3571.8371110813496"/>
  </node>
  <node id="16646" label="P61264" cy:nodeId="4405">
    <graphics x="-1494.6749225662015" z="0.0" y="-2918.755859375"/>
  </node>
  <node id="16645" label="P70441" cy:nodeId="4406">
    <graphics x="-1113.214351277139" z="0.0" y="-1959.897229371708"/>
  </node>
  <node id="16644" label="P26040" cy:nodeId="4407">
    <graphics x="-1160.9403034255765" z="0.0" y="-2004.469739137333"/>
  </node>
  <node id="16643" label="Q9EP69" cy:nodeId="4408">
    <graphics x="969.6480969828872" z="0.0" y="-4121.29414233135"/>
  </node>
  <node id="16642" label="Q62420" cy:nodeId="4409">
    <graphics x="925.9352063578872" z="0.0" y="-4070.8466325657246"/>
  </node>
  <node id="16641" label="P43024" cy:nodeId="4410">
    <graphics x="4939.80126953125" z="0.0" y="-1886.7784659437002"/>
  </node>
  <node id="16640" label="P14873" cy:nodeId="4411">
    <graphics x="-2117.3978397232704" z="0.0" y="-2043.1417278244235"/>
  </node>
  <node id="16639" label="P09103" cy:nodeId="4412">
    <graphics x="-2550.1771282150485" z="0.0" y="-1422.946297445722"/>
  </node>
  <node id="16638" label="P56382" cy:nodeId="4413">
    <graphics x="4997.05419921875" z="0.0" y="-1886.7784659437002"/>
  </node>
  <node id="16637" label="Q3UMR5" cy:nodeId="4414">
    <graphics x="1554.5251721781997" z="0.0" y="-3998.1759782688496"/>
  </node>
  <node id="16636" label="Q91ZA3" cy:nodeId="4415">
    <graphics x="3231.497190249875" z="0.0" y="71.93256927819596"/>
  </node>
  <node id="16635" label="Q61879" cy:nodeId="4416">
    <graphics x="-1682.6846923828125" z="0.0" y="-737.3563842773438"/>
  </node>
  <node id="16634" label="P63101" cy:nodeId="4417">
    <graphics x="-1892.8912835513224" z="0.0" y="-2780.0344206863"/>
  </node>
  <node id="16633" label="Q9QWI6" cy:nodeId="4418">
    <graphics x="-1945.1940179263224" z="0.0" y="-2756.74779959255"/>
  </node>
  <node id="16632" label="Q8R001" cy:nodeId="4419">
    <graphics x="-2001.1957269106974" z="0.0" y="-2744.844235139425"/>
  </node>
  <node id="16631" label="Q9DBF1" cy:nodeId="4420">
    <graphics x="2523.638791812375" z="0.0" y="542.7810037264381"/>
  </node>
  <node id="16630" label="Q64516" cy:nodeId="4421">
    <graphics x="1027.855637942088" z="0.0" y="-1958.925048828125"/>
  </node>
  <node id="16629" label="Q8VDN2" cy:nodeId="4422">
    <graphics x="-1536.1363483474515" z="0.0" y="-2951.8203125"/>
  </node>
  <node id="16628" label="Q6PCP5" cy:nodeId="4423">
    <graphics x="869.7799329203872" z="0.0" y="-4034.7580095188496"/>
  </node>
  <node id="16627" label="P23506" cy:nodeId="4424">
    <graphics x="1639.7485608500747" z="0.0" y="-5040.2711931126"/>
  </node>
  <node id="16626" label="Q9D6J5" cy:nodeId="4425">
    <graphics x="4901.18701171875" z="0.0" y="-2617.1515128187"/>
  </node>
  <node id="16625" label="Q00612" cy:nodeId="4426">
    <graphics x="1358.448167238963" z="0.0" y="-2607.14404296875"/>
  </node>
  <node id="16624" label="Q9WTT4" cy:nodeId="4427">
    <graphics x="1696.9670667094497" z="0.0" y="-4975.6852556126"/>
  </node>
  <node id="16623" label="Q5FWK3" cy:nodeId="4428">
    <graphics x="-1194.8707233474515" z="0.0" y="-2060.2664920670204"/>
  </node>
  <node id="16622" label="Q8CHU3" cy:nodeId="4429">
    <graphics x="629.2462415141372" z="0.0" y="-4693.9997087376"/>
  </node>
  <node id="16621" label="P59999" cy:nodeId="4430">
    <graphics x="-2665.029648824386" z="0.0" y="-2279.367403117522"/>
  </node>
  <node id="16620" label="Q9CVB6" cy:nodeId="4431">
    <graphics x="-2692.397812886886" z="0.0" y="-2350.013643351897"/>
  </node>
  <node id="16619" label="Q9CQC7" cy:nodeId="4432">
    <graphics x="4934.94189453125" z="0.0" y="-2574.2286612562"/>
  </node>
  <node id="16618" label="O88737" cy:nodeId="4433">
    <graphics x="-1142.1556396484375" z="0.0" y="-2632.30659242524"/>
  </node>
  <node id="16617" label="Q6PH08" cy:nodeId="4434">
    <graphics x="-1219.409912109375" z="0.0" y="-2525.975293597115"/>
  </node>
  <node id="16616" label="P39053" cy:nodeId="4435">
    <graphics x="805.7318372172622" z="0.0" y="-4015.9521013157246"/>
  </node>
  <node id="16615" label="Q6PB66" cy:nodeId="4436">
    <graphics x="663.1025626233877" z="0.0" y="647.6875"/>
  </node>
  <node id="16614" label="P31324" cy:nodeId="4437">
    <graphics x="-1725.415771484375" z="0.0" y="-753.8139038085938"/>
  </node>
  <node id="16613" label="Q8BR92" cy:nodeId="4438">
    <graphics x="-1765.5718994140625" z="0.0" y="-775.8201293945312"/>
  </node>
  <node id="16612" label="P97772" cy:nodeId="4439">
    <graphics x="-1802.4366455078125" z="0.0" y="-802.9822387695312"/>
  </node>
  <node id="16611" label="Q8CHT0" cy:nodeId="4440">
    <graphics x="2575.549924624875" z="0.0" y="477.68603302331314"/>
  </node>
  <node id="16610" label="P29758" cy:nodeId="4441">
    <graphics x="2650.564084781125" z="0.0" y="441.56103302331314"/>
  </node>
  <node id="16609" label="Q99L47" cy:nodeId="4442">
    <graphics x="663.1025626233877" z="0.0" y="554.24755859375"/>
  </node>
  <node id="16608" label="Q7TQF7" cy:nodeId="4443">
    <graphics x="738.9803723735122" z="0.0" y="-4015.9521013157246"/>
  </node>
  <node id="16607" label="P15116" cy:nodeId="4444">
    <graphics x="-1652.275146484375" z="0.0" y="-1659.1619873046875"/>
  </node>
  <node id="16606" label="P06837" cy:nodeId="4445">
    <graphics x="-1835.35205078125" z="0.0" y="-834.8156127929688"/>
  </node>
  <node id="16605" label="P07901" cy:nodeId="4446">
    <graphics x="217.66359777963777" z="0.0" y="504.09954833984375"/>
  </node>
  <node id="16604" label="P61982" cy:nodeId="4447">
    <graphics x="-2058.44829038726" z="0.0" y="-2744.844235139425"/>
  </node>
  <node id="16603" label="Q9WUA3" cy:nodeId="4448">
    <graphics x="1328.2583479030254" z="0.0" y="-2662.059326171875"/>
  </node>
  <node id="16602" label="Q60597" cy:nodeId="4449">
    <graphics x="1687.3298811061504" z="0.0" y="-2286.978759765625"/>
  </node>
  <node id="16601" label="P05063" cy:nodeId="4450">
    <graphics x="1312.673753176463" z="0.0" y="-2722.757080078125"/>
  </node>
  <node id="16600" label="Q8BKZ9" cy:nodeId="4451">
    <graphics x="1748.7917951686504" z="0.0" y="-2286.978759765625"/>
  </node>
  <node id="16599" label="Q9CPW4" cy:nodeId="4452">
    <graphics x="-2692.397812886886" z="0.0" y="-2425.774873820647"/>
  </node>
  <node id="16598" label="P17182" cy:nodeId="4453">
    <graphics x="1312.673753176463" z="0.0" y="-2785.423828125"/>
  </node>
  <node id="16597" label="Q8BMS1" cy:nodeId="4454">
    <graphics x="3110.747190249875" z="0.0" y="426.84301544518814"/>
  </node>
  <node id="16596" label="Q9Z268" cy:nodeId="4455">
    <graphics x="-2598.4447063400485" z="0.0" y="-1436.9271324066594"/>
  </node>
  <node id="16595" label="Q8BGD5" cy:nodeId="4456">
    <graphics x="2753.688596499875" z="0.0" y="-19.926279293581388"/>
  </node>
  <node id="16594" label="P42125" cy:nodeId="4457">
    <graphics x="3186.185666812375" z="0.0" y="419.85253692956314"/>
  </node>
  <node id="16593" label="Q61290" cy:nodeId="4458">
    <graphics x="1489.3742932719497" z="0.0" y="-3993.7194353000996"/>
  </node>
  <node id="16592" label="Q8R0S4" cy:nodeId="4459">
    <graphics x="1425.4369153422622" z="0.0" y="-4007.0058122532246"/>
  </node>
  <node id="16591" label="P08226" cy:nodeId="4460">
    <graphics x="-2643.8441204025485" z="0.0" y="-1458.469490805097"/>
  </node>
  <node id="16590" label="Q91ZX7" cy:nodeId="4461">
    <graphics x="-2685.2003215744235" z="0.0" y="-1487.0155113129094"/>
  </node>
  <node id="16589" label="Q8BLK3" cy:nodeId="4462">
    <graphics x="-2721.4417766525485" z="0.0" y="-1521.825936117597"/>
  </node>
  <node id="16588" label="P62835" cy:nodeId="4463">
    <graphics x="-1863.7308349609375" z="0.0" y="-870.7521362304688"/>
  </node>
  <node id="16587" label="Q6R891" cy:nodeId="4464">
    <graphics x="-1212.4893756912015" z="0.0" y="-2123.1478397232704"/>
  </node>
  <node id="16586" label="P60766" cy:nodeId="4465">
    <graphics x="-1212.4893756912015" z="0.0" y="-2188.4508182388954"/>
  </node>
  <node id="16585" label="Q99104" cy:nodeId="4466">
    <graphics x="-2114.449511090385" z="0.0" y="-2756.74779959255"/>
  </node>
  <node id="16584" label="Q62048" cy:nodeId="4467">
    <graphics x="-1887.066650390625" z="0.0" y="-910.1505126953125"/>
  </node>
  <node id="16583" label="Q9D6M3" cy:nodeId="4468">
    <graphics x="-1904.94287109375" z="0.0" y="-952.3077392578125"/>
  </node>
  <node id="16582" label="P47857" cy:nodeId="4469">
    <graphics x="1328.2583479030254" z="0.0" y="-2846.12158203125"/>
  </node>
  <node id="16581" label="P68368" cy:nodeId="4470">
    <graphics x="-1802.296190777885" z="0.0" y="-1411.2689690981977"/>
  </node>
  <node id="16580" label="Q922R8" cy:nodeId="4471">
    <graphics x="-2751.6297649337985" z="0.0" y="-1561.9989097504094"/>
  </node>
  <node id="16579" label="P10637" cy:nodeId="4472">
    <graphics x="-2774.9827922775485" z="0.0" y="-1606.4942710785344"/>
  </node>
  <node id="16578" label="P55088" cy:nodeId="4473">
    <graphics x="1367.4552258891372" z="0.0" y="-4037.0495134250996"/>
  </node>
  <node id="16577" label="Q9DBG3" cy:nodeId="4474">
    <graphics x="560.0165662211684" z="0.0" y="-4719.1969743626"/>
  </node>
  <node id="16576" label="Q6IRU5" cy:nodeId="4475">
    <graphics x="503.58004278366843" z="0.0" y="-4766.55293139385"/>
  </node>
  <node id="16575" label="P17183" cy:nodeId="4476">
    <graphics x="1358.448167238963" z="0.0" y="-2901.03662109375"/>
  </node>
  <node id="16574" label="Q9QXS6" cy:nodeId="4477">
    <graphics x="-2166.752245465385" z="0.0" y="-2780.0344206863"/>
  </node>
  <node id="16573" label="Q8BHL5" cy:nodeId="4478">
    <graphics x="674.9326428813247" z="0.0" y="-4034.7580095188496"/>
  </node>
  <node id="16572" label="O88712" cy:nodeId="4479">
    <graphics x="2645.463498843625" z="0.0" y="326.9647805819069"/>
  </node>
  <node id="16571" label="Q9DCB8" cy:nodeId="4480">
    <graphics x="2288.4045881374004" z="0.0" y="-2208.86083984375"/>
  </node>
  <node id="16570" label="Q9Z1J3" cy:nodeId="4481">
    <graphics x="2188.4048322780254" z="0.0" y="-2108.860595703125"/>
  </node>
  <node id="16569" label="Q8BMF3" cy:nodeId="4482">
    <graphics x="1808.4675764186504" z="0.0" y="-2272.2705078125"/>
  </node>
  <node id="16568" label="Q62425" cy:nodeId="4483">
    <graphics x="4959.9638671875" z="0.0" y="-2525.693260865575"/>
  </node>
  <node id="16567" label="P38647" cy:nodeId="4484">
    <graphics x="748.0617911390127" z="0.0" y="263.81805419921875"/>
  </node>
  <node id="16566" label="P63011" cy:nodeId="4485">
    <graphics x="-1194.8707233474515" z="0.0" y="-2251.3324100357704"/>
  </node>
  <node id="16565" label="Q60598" cy:nodeId="4486">
    <graphics x="-2665.029648824386" z="0.0" y="-2496.420869914397"/>
  </node>
  <node id="16564" label="P61161" cy:nodeId="4487">
    <graphics x="-2613.989121480636" z="0.0" y="-2552.409395305022"/>
  </node>
  <node id="16563" label="Q9Z0X1" cy:nodeId="4488">
    <graphics x="966.8297590358379" z="0.0" y="-2402.829833984375"/>
  </node>
  <node id="16562" label="Q8VDP6" cy:nodeId="4489">
    <graphics x="1058.354090635231" z="0.0" y="-3658.0155778782246"/>
  </node>
  <node id="16561" label="Q99L43" cy:nodeId="4490">
    <graphics x="992.3999280375747" z="0.0" y="-3736.6164079563496"/>
  </node>
  <node id="16560" label="Q8CAQ8" cy:nodeId="4491">
    <graphics x="1937.4451154811504" z="0.0" y="-2369.154541015625"/>
  </node>
  <node id="16559" label="Q9JLZ3" cy:nodeId="4492">
    <graphics x="3331.497190249875" z="0.0" y="30.51121307702408"/>
  </node>
  <node id="16558" label="P17665" cy:nodeId="4493">
    <graphics x="5053.0556640625" z="0.0" y="-1874.8746573499502"/>
  </node>
  <node id="16557" label="Q60931" cy:nodeId="4494">
    <graphics x="1862.8894514186504" z="0.0" y="-2243.70751953125"/>
  </node>
  <node id="16556" label="Q8QZT1" cy:nodeId="4495">
    <graphics x="3259.055295718625" z="0.0" y="440.58569122643814"/>
  </node>
  <node id="16555" label="Q8VD37" cy:nodeId="4496">
    <graphics x="1319.7289075297622" z="0.0" y="-4081.6225114719746"/>
  </node>
  <node id="16554" label="P16858" cy:nodeId="4497">
    <graphics x="1401.3464826686504" z="0.0" y="-2946.71875"/>
  </node>
  <node id="16553" label="P62746" cy:nodeId="4498">
    <graphics x="-1160.9403034255765" z="0.0" y="-2307.1287967545204"/>
  </node>
  <node id="16552" label="P11627" cy:nodeId="4499">
    <graphics x="-2790.8956340744235" z="0.0" y="-1654.1595542816594"/>
  </node>
  <node id="16551" label="P13595" cy:nodeId="4500">
    <graphics x="-2798.9566692306735" z="0.0" y="-1703.7601402191594"/>
  </node>
  <node id="16550" label="Q8BKX1" cy:nodeId="4501">
    <graphics x="1285.7984876078872" z="0.0" y="-4137.41914233135"/>
  </node>
  <node id="16549" label="O70589" cy:nodeId="4502">
    <graphics x="-1842.503517510095" z="0.0" y="-2590.102735003365"/>
  </node>
  <node id="16548" label="P16330" cy:nodeId="4503">
    <graphics x="-1809.751564385095" z="0.0" y="-2663.666699847115"/>
  </node>
  <node id="16547" label="P03995" cy:nodeId="4504">
    <graphics x="-2213.070604840385" z="0.0" y="-2813.6867644363"/>
  </node>
  <node id="16546" label="P99024" cy:nodeId="4505">
    <graphics x="-1571.0277057693265" z="0.0" y="-2991.7568359375"/>
  </node>
  <node id="16545" label="Q9Z218" cy:nodeId="4506">
    <graphics x="-2798.9566692306735" z="0.0" y="-1754.011482992597"/>
  </node>
  <node id="16544" label="P84091" cy:nodeId="4507">
    <graphics x="466.74361700241843" z="0.0" y="-4830.35566576885"/>
  </node>
  <node id="16543" label="Q9QXJ1" cy:nodeId="4508">
    <graphics x="-2790.8956340744235" z="0.0" y="-1803.612068930097"/>
  </node>
  <node id="16542" label="P68033" cy:nodeId="4509">
    <graphics x="-1917.04052734375" z="0.0" y="-996.471435546875"/>
  </node>
  <node id="16541" label="Q9R0Y5" cy:nodeId="4510">
    <graphics x="1454.257737551463" z="0.0" y="-2980.297119140625"/>
  </node>
  <node id="16540" label="P47802" cy:nodeId="4511">
    <graphics x="2939.672971499875" z="0.0" y="318.8236673006569"/>
  </node>
  <node id="16539" label="Q6PIE5" cy:nodeId="4512">
    <graphics x="-1598.2274128005765" z="0.0" y="-3037.281494140625"/>
  </node>
  <node id="16538" label="P70414" cy:nodeId="4513">
    <graphics x="-1616.861323933389" z="0.0" y="-3086.93115234375"/>
  </node>
  <node id="16537" label="P28652" cy:nodeId="4514">
    <graphics x="-1923.143798828125" z="0.0" y="-1041.853759765625"/>
  </node>
  <node id="16536" label="Q99K85" cy:nodeId="4515">
    <graphics x="2645.463498843625" z="0.0" y="195.5319192537819"/>
  </node>
  <node id="16535" label="P17156" cy:nodeId="4516">
    <graphics x="686.8244864515127" z="0.0" y="157.752197265625"/>
  </node>
  <node id="16534" label="P62204" cy:nodeId="4517">
    <graphics x="-1923.143798828125" z="0.0" y="-1087.64453125"/>
  </node>
  <node id="16533" label="P68254" cy:nodeId="4518">
    <graphics x="-2774.9827922775485" z="0.0" y="-1851.277840414472"/>
  </node>
  <node id="16532" label="Q9DBJ1" cy:nodeId="4519">
    <graphics x="1513.8572248561504" z="0.0" y="-2999.662353515625"/>
  </node>
  <node id="16531" label="P23818" cy:nodeId="4520">
    <graphics x="-1917.04052734375" z="0.0" y="-1133.026611328125"/>
  </node>
  <node id="16530" label="Q68FF6" cy:nodeId="4521">
    <graphics x="-2251.380175152885" z="0.0" y="-2856.2336394363"/>
  </node>
  <node id="16529" label="P30999" cy:nodeId="4522">
    <graphics x="-1660.62158203125" z="0.0" y="-1722.559326171875"/>
  </node>
  <node id="16528" label="P62482" cy:nodeId="4523">
    <graphics x="-2280.00590757476" z="0.0" y="-2905.815914826925"/>
  </node>
  <node id="16527" label="Q60996" cy:nodeId="4524">
    <graphics x="-2117.3978397232704" z="0.0" y="-2114.8866008712985"/>
  </node>
  <node id="16526" label="Q9R0N7" cy:nodeId="4525">
    <graphics x="-1626.330318074014" z="0.0" y="-3139.1103515625"/>
  </node>
  <node id="16525" label="Q62261" cy:nodeId="4526">
    <graphics x="-2751.6297649337985" z="0.0" y="-1895.773201742597"/>
  </node>
  <node id="16524" label="Q925I1" cy:nodeId="4527">
    <graphics x="713.6201407483877" z="0.0" y="475.64056396484375"/>
  </node>
  <node id="16523" label="P48453" cy:nodeId="4528">
    <graphics x="-2254.33544921875" z="0.0" y="-1027.12934633149"/>
  </node>
  <node id="16522" label="Q4ACU6" cy:nodeId="4529">
    <graphics x="618.7777356547622" z="0.0" y="-4070.8466325657246"/>
  </node>
  <node id="16521" label="Q8BYM5" cy:nodeId="4530">
    <graphics x="-1749.9103778616575" z="0.0" y="-2717.547559222115"/>
  </node>
  <node id="16520" label="Q9JIS5" cy:nodeId="4531">
    <graphics x="-2297.69829038726" z="0.0" y="-2960.26635428005"/>
  </node>
  <node id="16519" label="P40630" cy:nodeId="4532">
    <graphics x="5105.3583984375" z="0.0" y="-1851.5880362562002"/>
  </node>
  <node id="16518" label="Q9CS84" cy:nodeId="4533">
    <graphics x="-1673.3276141897825" z="0.0" y="-2742.430860003365"/>
  </node>
  <node id="16517" label="O08539" cy:nodeId="4534">
    <graphics x="575.0645398539809" z="0.0" y="-4121.29414233135"/>
  </node>
  <node id="16516" label="O70318" cy:nodeId="4535">
    <graphics x="-1593.2450946585325" z="0.0" y="-2734.013867815865"/>
  </node>
  <node id="16515" label="Q64332" cy:nodeId="4536">
    <graphics x="-2303.68266538726" z="0.0" y="-3017.2053191238"/>
  </node>
  <node id="16514" label="P60761" cy:nodeId="4537">
    <graphics x="-2297.69829038726" z="0.0" y="-3074.144039826925"/>
  </node>
  <node id="16513" label="P00493" cy:nodeId="4538">
    <graphics x="966.8297590358379" z="0.0" y="-2517.62451171875"/>
  </node>
  <node id="16512" label="Q9Z0R4" cy:nodeId="4539">
    <graphics x="453.95052618210593" z="0.0" y="-4902.9088884251"/>
  </node>
  <node id="16511" label="Q80Y14" cy:nodeId="4540">
    <graphics x="2088.4048322780254" z="0.0" y="-2208.86083984375"/>
  </node>
  <node id="16510" label="Q5SQX6" cy:nodeId="4541">
    <graphics x="1268.1799573344497" z="0.0" y="-4200.3004899876"/>
  </node>
  <node id="16509" label="Q9CPQ1" cy:nodeId="4542">
    <graphics x="5151.6767578125" z="0.0" y="-1817.9356925062002"/>
  </node>
  <node id="16508" label="Q3UHL1" cy:nodeId="4543">
    <graphics x="-2280.00590757476" z="0.0" y="-3128.594723420675"/>
  </node>
  <node id="16507" label="Q60932" cy:nodeId="4544">
    <graphics x="-1652.275146484375" z="0.0" y="-1785.956787109375"/>
  </node>
  <node id="16506" label="O08585" cy:nodeId="4545">
    <graphics x="466.74361700241843" z="0.0" y="-4975.4625993626"/>
  </node>
  <node id="16505" label="Q9QYR6" cy:nodeId="4546">
    <graphics x="-2094.1016971451454" z="0.0" y="-2182.7442668869235"/>
  </node>
  <node id="16504" label="B9EKR1" cy:nodeId="4547">
    <graphics x="514.8354117444815" z="0.0" y="119.31082153320312"/>
  </node>
  <node id="16503" label="O54991" cy:nodeId="4548">
    <graphics x="479.7419058851065" z="0.0" y="215.72891235351562"/>
  </node>
  <node id="16502" label="P45376" cy:nodeId="4549">
    <graphics x="2770.463010562375" z="0.0" y="154.9171731600319"/>
  </node>
  <node id="16501" label="Q62419" cy:nodeId="4550">
    <graphics x="547.3350476664809" z="0.0" y="-4182.0133806126"/>
  </node>
  <node id="16500" label="P60469" cy:nodeId="4551">
    <graphics x="-1523.5092548147825" z="0.0" y="-2693.75190492524"/>
  </node>
  <node id="16499" label="Q91ZJ5" cy:nodeId="4552">
    <graphics x="1576.4001936061504" z="0.0" y="-3003.59716796875"/>
  </node>
  <node id="16498" label="P63328" cy:nodeId="4553">
    <graphics x="-2315.572509765625" z="0.0" y="-1133.1953863705526"/>
  </node>
  <node id="16497" label="O55042" cy:nodeId="4554">
    <graphics x="-1626.330318074014" z="0.0" y="-3192.1416015625"/>
  </node>
  <node id="16496" label="P28667" cy:nodeId="4555">
    <graphics x="-2050.0355350357704" z="0.0" y="-2239.3609661056735"/>
  </node>
  <node id="16495" label="Q9D8B3" cy:nodeId="4556">
    <graphics x="537.8353528422622" z="0.0" y="-4248.0866228001"/>
  </node>
  <node id="16494" label="P01831" cy:nodeId="4557">
    <graphics x="1156.9183606547622" z="0.0" y="-4508.2946306126"/>
  </node>
  <node id="16493" label="P20357" cy:nodeId="4558">
    <graphics x="-1904.94287109375" z="0.0" y="-1177.1904296875"/>
  </node>
  <node id="16492" label="Q3UVX5" cy:nodeId="4559">
    <graphics x="-1887.066650390625" z="0.0" y="-1219.34765625"/>
  </node>
  <node id="16491" label="Q91WC3" cy:nodeId="4560">
    <graphics x="2753.688596499875" z="0.0" y="-151.3592626920189"/>
  </node>
  <node id="16490" label="Q8BWF0" cy:nodeId="4561">
    <graphics x="1908.893968020213" z="0.0" y="-2202.950439453125"/>
  </node>
  <node id="16489" label="Q8BH04" cy:nodeId="4562">
    <graphics x="1943.8083967311504" z="0.0" y="-2152.368408203125"/>
  </node>
  <node id="16488" label="Q99MR8" cy:nodeId="4563">
    <graphics x="3431.497190249875" z="0.0" y="71.93256927819596"/>
  </node>
  <node id="16487" label="Q99PJ0" cy:nodeId="4564">
    <graphics x="-2721.4417766525485" z="0.0" y="-1935.945565023847"/>
  </node>
  <node id="16486" label="Q9D6F9" cy:nodeId="4565">
    <graphics x="1268.1799573344497" z="0.0" y="-4265.6042009251"/>
  </node>
  <node id="16485" label="P41216" cy:nodeId="4566">
    <graphics x="2878.688596499875" z="0.0" y="-191.97401641516342"/>
  </node>
  <node id="16484" label="Q6P1F6" cy:nodeId="4567">
    <graphics x="-1989.9730350357706" z="0.0" y="-2278.6021770431735"/>
  </node>
  <node id="16483" label="P28663" cy:nodeId="4568">
    <graphics x="-1616.861323933389" z="0.0" y="-3244.32080078125"/>
  </node>
  <node id="16482" label="P68181" cy:nodeId="4569">
    <graphics x="-1863.7308349609375" z="0.0" y="-1258.74609375"/>
  </node>
  <node id="16481" label="Q80VP1" cy:nodeId="4570">
    <graphics x="503.58004278366843" z="0.0" y="-5039.26484545635"/>
  </node>
  <node id="16480" label="Q6PIC6" cy:nodeId="4571">
    <graphics x="-1835.35205078125" z="0.0" y="-1294.6827392578125"/>
  </node>
  <node id="16479" label="Q9R111" cy:nodeId="4572">
    <graphics x="1056.580003176463" z="0.0" y="-2589.1982421875"/>
  </node>
  <node id="16478" label="Q9D0F9" cy:nodeId="4573">
    <graphics x="1637.956712160838" z="0.0" y="-2991.8544921875"/>
  </node>
  <node id="16477" label="Q62465" cy:nodeId="4574">
    <graphics x="-2251.380175152885" z="0.0" y="-3178.176754670675"/>
  </node>
  <node id="16476" label="Q9WUB3" cy:nodeId="4575">
    <graphics x="1694.6592268092754" z="0.0" y="-2965.17236328125"/>
  </node>
  <node id="16475" label="Q91VZ6" cy:nodeId="4576">
    <graphics x="560.0165662211684" z="0.0" y="-5086.6208024876"/>
  </node>
  <node id="16474" label="Q8CHC4" cy:nodeId="4577">
    <graphics x="547.3350476664809" z="0.0" y="-4314.1579118626"/>
  </node>
  <node id="16473" label="Q61411" cy:nodeId="4578">
    <graphics x="-1802.4366455078125" z="0.0" y="-1326.5159912109375"/>
  </node>
  <node id="16472" label="Q60875" cy:nodeId="4579">
    <graphics x="-1113.214351277139" z="0.0" y="-2351.7015506607704"/>
  </node>
  <node id="16471" label="O55023" cy:nodeId="4580">
    <graphics x="992.3999280375747" z="0.0" y="-3839.2223649875996"/>
  </node>
  <node id="16470" label="Q80UU9" cy:nodeId="4581">
    <graphics x="-1872.0319085513224" z="0.0" y="-1371.0070062075727"/>
  </node>
  <node id="16469" label="Q9R0P9" cy:nodeId="4582">
    <graphics x="-1598.2274128005765" z="0.0" y="-3293.970458984375"/>
  </node>
  <node id="16468" label="P0C0A3" cy:nodeId="4583">
    <graphics x="575.0645398539809" z="0.0" y="-4374.8776384251"/>
  </node>
  <node id="16467" label="Q9WU78" cy:nodeId="4584">
    <graphics x="618.7777356547622" z="0.0" y="-4425.32539233135"/>
  </node>
  <node id="16466" label="P50396" cy:nodeId="4585">
    <graphics x="-1055.2325397537015" z="0.0" y="-2381.7454959732704"/>
  </node>
  <node id="16465" label="P62821" cy:nodeId="4586">
    <graphics x="-991.2952228591703" z="0.0" y="-2395.0316287857704"/>
  </node>
  <node id="16464" label="Q9CQI6" cy:nodeId="4587">
    <graphics x="-2546.170029683761" z="0.0" y="-2586.179658976897"/>
  </node>
  <node id="16463" label="Q9CRB9" cy:nodeId="4588">
    <graphics x="1837.4453596217754" z="0.0" y="-2469.15478515625"/>
  </node>
  <node id="16462" label="P35279" cy:nodeId="4589">
    <graphics x="-926.1442218826078" z="0.0" y="-2390.5755740982704"/>
  </node>
  <node id="16461" label="Q9DC28" cy:nodeId="4590">
    <graphics x="-1920.4229862076456" z="0.0" y="-2296.2142375900485"/>
  </node>
  <node id="16460" label="Q8VBV7" cy:nodeId="4591">
    <graphics x="-1952.1146722231974" z="0.0" y="-1362.5900140200727"/>
  </node>
  <node id="16459" label="P47708" cy:nodeId="4592">
    <graphics x="-864.6115070388578" z="0.0" y="-2368.7066776138954"/>
  </node>
  <node id="16458" label="Q60605" cy:nodeId="4593">
    <graphics x="-1765.5718994140625" z="0.0" y="-1353.67822265625"/>
  </node>
  <node id="16457" label="P22723" cy:nodeId="4594">
    <graphics x="-2254.33544921875" z="0.0" y="-1239.2613043393026"/>
  </node>
  <node id="16456" label="P62743" cy:nodeId="4595">
    <graphics x="629.2462415141372" z="0.0" y="-5111.81855639385"/>
  </node>
  <node id="16455" label="P19246" cy:nodeId="4596">
    <graphics x="-2213.070604840385" z="0.0" y="-3220.7238738113"/>
  </node>
  <node id="16454" label="Q80U28" cy:nodeId="4597">
    <graphics x="3319.514768374875" z="0.0" y="486.24242950768814"/>
  </node>
  <node id="16453" label="Q61553" cy:nodeId="4598">
    <graphics x="-2028.69731382476" z="0.0" y="-1387.4733148013227"/>
  </node>
  <node id="16452" label="Q810U3" cy:nodeId="4599">
    <graphics x="-2685.2003215744235" z="0.0" y="-1970.7559898285344"/>
  </node>
  <node id="16451" label="P67871" cy:nodeId="4600">
    <graphics x="-2088.53813413726" z="0.0" y="-1441.3541741763227"/>
  </node>
  <node id="16450" label="Q8R3V5" cy:nodeId="4601">
    <graphics x="674.9326428813247" z="0.0" y="-4461.4137712376"/>
  </node>
  <node id="16449" label="P58281" cy:nodeId="4602">
    <graphics x="1168.4966291530254" z="0.0" y="-2563.654296875"/>
  </node>
  <node id="16448" label="P27546" cy:nodeId="4603">
    <graphics x="-1571.0277057693265" z="0.0" y="-3339.4951171875"/>
  </node>
  <node id="16447" label="P63318" cy:nodeId="4604">
    <graphics x="-1725.415771484375" z="0.0" y="-1375.6844482421875"/>
  </node>
  <node id="16446" label="P70296" cy:nodeId="4605">
    <graphics x="1742.9446271999004" z="0.0" y="-2925.227294921875"/>
  </node>
  <node id="16445" label="P56564" cy:nodeId="4606">
    <graphics x="-1568.8419938938496" z="0.0" y="-4182.00830078125"/>
  </node>
  <node id="16444" label="P00405" cy:nodeId="4607">
    <graphics x="5189.986328125" z="0.0" y="-1775.3890616468252"/>
  </node>
  <node id="16443" label="Q9EPJ9" cy:nodeId="4608">
    <graphics x="1058.354090635231" z="0.0" y="-3917.8229509250996"/>
  </node>
  <node id="16442" label="Q5DQR4" cy:nodeId="4609">
    <graphics x="1285.7984876078872" z="0.0" y="-4328.4860368626"/>
  </node>
  <node id="16441" label="O35239" cy:nodeId="4610">
    <graphics x="-1536.1363483474515" z="0.0" y="-3379.431640625"/>
  </node>
  <node id="16440" label="Q8BW75" cy:nodeId="4611">
    <graphics x="2733.823850406125" z="0.0" y="441.56103302331314"/>
  </node>
  <node id="16439" label="O08599" cy:nodeId="4612">
    <graphics x="-1494.6749225662015" z="0.0" y="-3412.49609375"/>
  </node>
  <node id="16438" label="Q9QXS1" cy:nodeId="4613">
    <graphics x="-2166.752245465385" z="0.0" y="-3254.375973420675"/>
  </node>
  <node id="16437" label="P20444" cy:nodeId="4614">
    <graphics x="738.9803723735122" z="0.0" y="-4480.21992358135"/>
  </node>
  <node id="16436" label="Q60930" cy:nodeId="4615">
    <graphics x="-2121.29008726226" z="0.0" y="-1514.9165521060102"/>
  </node>
  <node id="16435" label="Q99P72" cy:nodeId="4616">
    <graphics x="390.88259192026277" z="0.0" y="267.03192138671875"/>
  </node>
  <node id="16434" label="O35643" cy:nodeId="4617">
    <graphics x="702.9189710063247" z="0.0" y="-5111.81855639385"/>
  </node>
  <node id="16433" label="Q8R191" cy:nodeId="4618">
    <graphics x="1034.4438733500747" z="0.0" y="-4508.2946306126"/>
  </node>
  <node id="16432" label="P61164" cy:nodeId="4619">
    <graphics x="-2121.29008726226" z="0.0" y="-1595.4404778872602"/>
  </node>
  <node id="16431" label="O55100" cy:nodeId="4620">
    <graphics x="-1682.6846923828125" z="0.0" y="-1392.1419677734375"/>
  </node>
  <node id="16430" label="Q5RJI5" cy:nodeId="4621">
    <graphics x="-2114.449511090385" z="0.0" y="-3277.66283865505"/>
  </node>
  <node id="16429" label="Q8BZ98" cy:nodeId="4622">
    <graphics x="805.7318372172622" z="0.0" y="-4480.21992358135"/>
  </node>
  <node id="16428" label="Q61644" cy:nodeId="4623">
    <graphics x="869.7799329203872" z="0.0" y="-4461.4137712376"/>
  </node>
  <node id="16427" label="P19096" cy:nodeId="4624">
    <graphics x="1027.855637942088" z="0.0" y="-2090.357666015625"/>
  </node>
  <node id="16426" label="P35564" cy:nodeId="4625">
    <graphics x="-2643.8441204025485" z="0.0" y="-1999.302010336347"/>
  </node>
  <node id="16425" label="Q9CZ42" cy:nodeId="4626">
    <graphics x="2808.838987124875" z="0.0" y="477.68603302331314"/>
  </node>
  <node id="16424" label="Q61490" cy:nodeId="4627">
    <graphics x="973.2066907328872" z="0.0" y="-4614.3610368626"/>
  </node>
  <node id="16423" label="P46096" cy:nodeId="4628">
    <graphics x="-1447.9757038162015" z="0.0" y="-3437.6259765625"/>
  </node>
  <node id="16422" label="Q922H2" cy:nodeId="4629">
    <graphics x="1965.6030744655254" z="0.0" y="-2094.901123046875"/>
  </node>
  <node id="16421" label="P28740" cy:nodeId="4630">
    <graphics x="925.9352063578872" z="0.0" y="-4425.32539233135"/>
  </node>
  <node id="16420" label="Q9CWZ7" cy:nodeId="4631">
    <graphics x="-1397.5399128005765" z="0.0" y="-3454.013671875"/>
  </node>
  <node id="16419" label="O35857" cy:nodeId="4632">
    <graphics x="748.0617911390127" z="0.0" y="51.68577194213867"/>
  </node>
  <node id="16418" label="Q9D880" cy:nodeId="4633">
    <graphics x="870.535973267919" z="0.0" y="51.68577194213867"/>
  </node>
  <node id="16417" label="P43406" cy:nodeId="4634">
    <graphics x="1159.4010266703872" z="0.0" y="-3935.6403337375996"/>
  </node>
  <node id="16416" label="Q71LX4" cy:nodeId="4635">
    <graphics x="1248.2610120219497" z="0.0" y="-3884.3373552219746"/>
  </node>
  <node id="16415" label="P48962" cy:nodeId="4636">
    <graphics x="-1627.8046875" z="0.0" y="-1845.0338134765625"/>
  </node>
  <node id="16414" label="Q8CI94" cy:nodeId="4637">
    <graphics x="1779.7793439967754" z="0.0" y="-2874.52880859375"/>
  </node>
  <node id="16413" label="Q8K021" cy:nodeId="4638">
    <graphics x="1034.4438733500747" z="0.0" y="-4720.42695483135"/>
  </node>
  <node id="16412" label="P63321" cy:nodeId="4639">
    <graphics x="-1638.141357421875" z="0.0" y="-1402.7572021484375"/>
  </node>
  <node id="16411" label="P48722" cy:nodeId="4640">
    <graphics x="289.83547277963777" z="0.0" y="249.2145233154297"/>
  </node>
  <node id="16410" label="O35143" cy:nodeId="4641">
    <graphics x="5218.61279296875" z="0.0" y="-1725.8066641858877"/>
  </node>
  <node id="16409" label="P84096" cy:nodeId="4642">
    <graphics x="-811.260737995889" z="0.0" y="-2331.0474979263954"/>
  </node>
  <node id="16408" label="P26645" cy:nodeId="4643">
    <graphics x="-1592.5806884765625" z="0.0" y="-1407.340576171875"/>
  </node>
  <node id="16407" label="P28661" cy:nodeId="4644">
    <graphics x="-1646.0959001438496" z="0.0" y="-4075.67724609375"/>
  </node>
  <node id="16406" label="P42208" cy:nodeId="4645">
    <graphics x="-1771.0961442844746" z="0.0" y="-4116.29248046875"/>
  </node>
  <node id="16405" label="Q9WV34" cy:nodeId="4646">
    <graphics x="-1546.8155517578125" z="0.0" y="-1405.810546875"/>
  </node>
  <node id="16404" label="Q9Z2Q6" cy:nodeId="4647">
    <graphics x="-1771.0961442844746" z="0.0" y="-4247.72509765625"/>
  </node>
  <node id="16403" label="Q9Z2I0" cy:nodeId="4648">
    <graphics x="1319.7289075297622" z="0.0" y="-4384.28242358135"/>
  </node>
  <node id="16402" label="P18760" cy:nodeId="4649">
    <graphics x="-2470.731308980636" z="0.0" y="-2593.170381633147"/>
  </node>
  <node id="16401" label="P40124" cy:nodeId="4650">
    <graphics x="-2397.861680074386" z="0.0" y="-2572.436739055022"/>
  </node>
  <node id="16400" label="O54983" cy:nodeId="4651">
    <graphics x="1367.4552258891372" z="0.0" y="-4428.8551774876"/>
  </node>
  <node id="16399" label="Q8VDQ8" cy:nodeId="4652">
    <graphics x="1425.4369153422622" z="0.0" y="-4458.8991228001"/>
  </node>
  <node id="16398" label="P08551" cy:nodeId="4653">
    <graphics x="-2058.44829038726" z="0.0" y="-3289.56615896755"/>
  </node>
  <node id="16397" label="Q8K4Z3" cy:nodeId="4654">
    <graphics x="2860.749631656125" z="0.0" y="542.7810037264381"/>
  </node>
  <node id="16396" label="P08553" cy:nodeId="4655">
    <graphics x="-2001.1957269106974" z="0.0" y="-3289.56615896755"/>
  </node>
  <node id="16395" label="Q61699" cy:nodeId="4656">
    <graphics x="283.61769934213777" z="0.0" y="425.4990234375"/>
  </node>
  <node id="16394" label="P12960" cy:nodeId="4657">
    <graphics x="-2598.4447063400485" z="0.0" y="-2020.844490805097"/>
  </node>
  <node id="16393" label="Q7TSJ2" cy:nodeId="4658">
    <graphics x="-1344.9883991287015" z="0.0" y="-3461.132080078125"/>
  </node>
  <node id="16392" label="O35136" cy:nodeId="4659">
    <graphics x="-2550.1771282150485" z="0.0" y="-2034.825203695722"/>
  </node>
  <node id="16391" label="O55131" cy:nodeId="4660">
    <graphics x="-1646.0959001438496" z="0.0" y="-4288.3408203125"/>
  </node>
  <node id="16390" label="Q9WV55" cy:nodeId="4661">
    <graphics x="-1292.010493855264" z="0.0" y="-3458.7529296875"/>
  </node>
  <node id="16389" label="Q7TMB8" cy:nodeId="4662">
    <graphics x="1489.3742932719497" z="0.0" y="-4472.1852556126"/>
  </node>
  <node id="16388" label="Q80TZ3" cy:nodeId="4663">
    <graphics x="772.1488294047622" z="0.0" y="-5086.6208024876"/>
  </node>
  <node id="16387" label="O88643" cy:nodeId="4664">
    <graphics x="-770.0486408279203" z="0.0" y="-2280.3914920670204"/>
  </node>
  <node id="16386" label="Q8BIJ6" cy:nodeId="4665">
    <graphics x="798.6162344983877" z="0.0" y="436.82415771484375"/>
  </node>
  <node id="16385" label="P55302" cy:nodeId="4666">
    <graphics x="-2500.2921184494235" z="0.0" y="-2040.882332601972"/>
  </node>
  <node id="16384" label="Q91XV3" cy:nodeId="4667">
    <graphics x="-1501.66259765625" z="0.0" y="-1398.1942138671875"/>
  </node>
  <node id="16383" label="P48758" cy:nodeId="4668">
    <graphics x="-1945.1940179263224" z="0.0" y="-3277.66283865505"/>
  </node>
  <node id="16382" label="Q9R1V6" cy:nodeId="4669">
    <graphics x="-1457.9276123046875" z="0.0" y="-1384.6275634765625"/>
  </node>
  <node id="16381" label="P23242" cy:nodeId="4670">
    <graphics x="-1588.877685546875" z="0.0" y="-1895.7645263671875"/>
  </node>
  <node id="16380" label="Q9QY76" cy:nodeId="4671">
    <graphics x="-1240.308833699014" z="0.0" y="-3446.952392578125"/>
  </node>
  <node id="16379" label="P57780" cy:nodeId="4672">
    <graphics x="-2450.0816692306735" z="0.0" y="-2038.859383383222"/>
  </node>
  <node id="16378" label="Q9CR16" cy:nodeId="4673">
    <graphics x="384.66481848276277" z="0.0" y="407.68157958984375"/>
  </node>
  <node id="16377" label="Q99NE5" cy:nodeId="4674">
    <graphics x="-1344.4100341796875" z="0.0" y="-2566.58979555024"/>
  </node>
  <node id="16376" label="Q8K183" cy:nodeId="4675">
    <graphics x="-1848.9232303482706" z="0.0" y="-2290.2901653244235"/>
  </node>
  <node id="16375" label="P11798" cy:nodeId="4676">
    <graphics x="-1416.391357421875" z="0.0" y="-1365.3526611328125"/>
  </node>
  <node id="16374" label="P48036" cy:nodeId="4677">
    <graphics x="-2088.53813413726" z="0.0" y="-1669.0024896060102"/>
  </node>
  <node id="16373" label="Q9D1T0" cy:nodeId="4678">
    <graphics x="223.88137121713777" z="0.0" y="170.61376953125"/>
  </node>
  <node id="16372" label="Q61316" cy:nodeId="4679">
    <graphics x="-1892.8912835513224" z="0.0" y="-3254.375973420675"/>
  </node>
  <node id="16371" label="O08917" cy:nodeId="4680">
    <graphics x="653.1926526469497" z="0.0" y="-3612.4521013157246"/>
  </node>
  <node id="16370" label="Q60634" cy:nodeId="4681">
    <graphics x="653.1926526469497" z="0.0" y="-3743.8849626438496"/>
  </node>
  <node id="16369" label="P97300" cy:nodeId="4682">
    <graphics x="223.88137121713777" z="0.0" y="68.00791931152344"/>
  </node>
  <node id="16368" label="Q8CHH9" cy:nodeId="4683">
    <graphics x="1554.5251721781997" z="0.0" y="-4467.72871264385"/>
  </node>
  <node id="16367" label="Q9CR62" cy:nodeId="4684">
    <graphics x="4527.39599609375" z="0.0" y="-1964.2354971937002"/>
  </node>
  <node id="16366" label="Q91VR7" cy:nodeId="4685">
    <graphics x="-1783.2210819107706" z="0.0" y="-2261.4698528244235"/>
  </node>
  <node id="16365" label="Q68FH0" cy:nodeId="4686">
    <graphics x="-1538.1470947265625" z="0.0" y="-1934.69287109375"/>
  </node>
  <node id="16364" label="Q7TMM9" cy:nodeId="4687">
    <graphics x="-1191.5450397537015" z="0.0" y="-3426.109619140625"/>
  </node>
  <node id="16363" label="Q2PFD7" cy:nodeId="4688">
    <graphics x="778.1926526469497" z="0.0" y="-3784.4994645969746"/>
  </node>
  <node id="16362" label="Q920P5" cy:nodeId="4689">
    <graphics x="-1846.5729241763224" z="0.0" y="-3220.7238738113"/>
  </node>
  <node id="16361" label="Q3THE2" cy:nodeId="4690">
    <graphics x="-2028.69731382476" z="0.0" y="-1722.8834710513227"/>
  </node>
  <node id="16360" label="Q61151" cy:nodeId="4691">
    <graphics x="-1730.4365360123331" z="0.0" y="-2212.8785442306735"/>
  </node>
  <node id="16359" label="Q91VT4" cy:nodeId="4692">
    <graphics x="3359.398069156125" z="0.0" y="550.6564920076881"/>
  </node>
  <node id="16358" label="Q78IK2" cy:nodeId="4693">
    <graphics x="4561.54296875" z="0.0" y="-1901.1371085218252"/>
  </node>
  <node id="16357" label="Q8R5C5" cy:nodeId="4694">
    <graphics x="1616.0578870219497" z="0.0" y="-4445.8600603001"/>
  </node>
  <node id="16356" label="Q03157" cy:nodeId="4695">
    <graphics x="-2400.8460735275485" z="0.0" y="-2028.807381430097"/>
  </node>
  <node id="16355" label="Q8CGK3" cy:nodeId="4696">
    <graphics x="891.1051871351065" z="0.0" y="450.12200927734375"/>
  </node>
  <node id="16354" label="Q3ULJ0" cy:nodeId="4697">
    <graphics x="1152.8557600124004" z="0.0" y="-2130.972900390625"/>
  </node>
  <node id="16353" label="Q61206" cy:nodeId="4698">
    <graphics x="-1696.2895633560831" z="0.0" y="-2149.7806438400485"/>
  </node>
  <node id="16352" label="Q9QYA2" cy:nodeId="4699">
    <graphics x="1937.4451154811504" z="0.0" y="-2569.1552734375"/>
  </node>
  <node id="16351" label="Q8R366" cy:nodeId="4700">
    <graphics x="-2353.8602336837985" z="0.0" y="-2010.988045492597"/>
  </node>
  <node id="16350" label="F6SEU4" cy:nodeId="4701">
    <graphics x="-1377.7945556640625" z="0.0" y="-1340.71337890625"/>
  </node>
  <node id="16349" label="Q921M7" cy:nodeId="4702">
    <graphics x="-1952.1146722231974" z="0.0" y="-1747.7666497622602"/>
  </node>
  <node id="16348" label="Q8BH59" cy:nodeId="4703">
    <graphics x="-1342.82568359375" z="0.0" y="-1311.149658203125"/>
  </node>
  <node id="16347" label="Q8BRT1" cy:nodeId="4704">
    <graphics x="969.6480969828872" z="0.0" y="-4374.8776384251"/>
  </node>
  <node id="16346" label="P20152" cy:nodeId="4705">
    <graphics x="-1479.070068359375" z="0.0" y="-1959.1619873046875"/>
  </node>
  <node id="16345" label="Q9CZW5" cy:nodeId="4706">
    <graphics x="961.7225577405752" z="0.0" y="511.31219482421875"/>
  </node>
  <node id="16344" label="Q6P9K9" cy:nodeId="4707">
    <graphics x="-1476.1784442679075" z="0.0" y="-2628.605176409615"/>
  </node>
  <node id="16343" label="Q9CQW1" cy:nodeId="4708">
    <graphics x="-1872.0319085513224" z="0.0" y="-1739.3499017153852"/>
  </node>
  <node id="16342" label="Q921J2" cy:nodeId="4709">
    <graphics x="-1808.2633538638224" z="0.0" y="-3178.176754670675"/>
  </node>
  <node id="16341" label="Q9ERD7" cy:nodeId="4710">
    <graphics x="-1415.672607421875" z="0.0" y="-1967.5084228515625"/>
  </node>
  <node id="16340" label="P43006" cy:nodeId="4711">
    <graphics x="1156.9183606547622" z="0.0" y="-4720.42695483135"/>
  </node>
  <node id="16339" label="Q80XN0" cy:nodeId="4712">
    <graphics x="1669.4087171000747" z="0.0" y="-4408.2008806126"/>
  </node>
  <node id="16338" label="Q9CWS0" cy:nodeId="4713">
    <graphics x="-1802.296190777885" z="0.0" y="-1699.0879388247602"/>
  </node>
  <node id="16337" label="Q8K0T0" cy:nodeId="4714">
    <graphics x="289.83547277963777" z="0.0" y="-10.593049049377441"/>
  </node>
  <node id="16336" label="P13020" cy:nodeId="4715">
    <graphics x="-1779.6373773013224" z="0.0" y="-3128.594723420675"/>
  </node>
  <node id="16335" label="Q61330" cy:nodeId="4716">
    <graphics x="390.88259192026277" z="0.0" y="-28.410444259643555"/>
  </node>
  <node id="16334" label="Q63810" cy:nodeId="4717">
    <graphics x="-2131.861083984375" z="0.0" y="-1239.2613043393026"/>
  </node>
  <node id="16333" label="Q9Z2W9" cy:nodeId="4718">
    <graphics x="-1147.2864948318265" z="0.0" y="-3396.894775390625"/>
  </node>
  <node id="16332" label="Q04447" cy:nodeId="4719">
    <graphics x="473.5241324476065" z="0.0" y="458.98431396484375"/>
  </node>
  <node id="16331" label="Q9Z0P4" cy:nodeId="4720">
    <graphics x="-1108.9556842849515" z="0.0" y="-3360.246826171875"/>
  </node>
  <node id="16330" label="Q9D8Y0" cy:nodeId="4721">
    <graphics x="-2310.3411907150485" z="0.0" y="-1985.8624351410344"/>
  </node>
  <node id="16329" label="Q9CYT6" cy:nodeId="4722">
    <graphics x="-2337.402451558761" z="0.0" y="-2526.780244914397"/>
  </node>
  <node id="16328" label="Q99KB8" cy:nodeId="4723">
    <graphics x="2188.4048322780254" z="0.0" y="-2308.860595703125"/>
  </node>
  <node id="16327" label="Q9D6K5" cy:nodeId="4724">
    <graphics x="997.3775891703872" z="0.0" y="-4314.1579118626"/>
  </node>
  <node id="16326" label="Q6URW6" cy:nodeId="4725">
    <graphics x="-1312.1103515625" z="0.0" y="-1277.1888427734375"/>
  </node>
  <node id="16325" label="Q9R1V7" cy:nodeId="4726">
    <graphics x="-2271.4163860275485" z="0.0" y="-1954.080818930097"/>
  </node>
  <node id="16324" label="Q9ES97" cy:nodeId="4727">
    <graphics x="479.7419058851065" z="0.0" y="22.892559051513672"/>
  </node>
  <node id="16323" label="D3YVF0" cy:nodeId="4728">
    <graphics x="-1286.195068359375" z="0.0" y="-1239.43701171875"/>
  </node>
  <node id="16322" label="Q810U4" cy:nodeId="4729">
    <graphics x="-2238.0936321212985" z="0.0" y="-1916.467293539472"/>
  </node>
  <node id="16321" label="A2CG49" cy:nodeId="4730">
    <graphics x="-1265.542724609375" z="0.0" y="-1198.56787109375"/>
  </node>
  <node id="16320" label="P53994" cy:nodeId="4731">
    <graphics x="-744.031734089639" z="0.0" y="-2220.4930545670204"/>
  </node>
  <node id="16319" label="O89053" cy:nodeId="4732">
    <graphics x="-1352.275146484375" z="0.0" y="-1959.1619873046875"/>
  </node>
  <node id="16318" label="Q9JIA1" cy:nodeId="4733">
    <graphics x="-1250.522216796875" z="0.0" y="-1155.310791015625"/>
  </node>
  <node id="16317" label="Q91WS0" cy:nodeId="4734">
    <graphics x="4975.34765625" z="0.0" y="-2473.299706178075"/>
  </node>
  <node id="16316" label="Q8K400" cy:nodeId="4735">
    <graphics x="-1077.7847858474515" z="0.0" y="-3317.34375"/>
  </node>
  <node id="16315" label="Q91ZZ3" cy:nodeId="4736">
    <graphics x="-2211.2359661056735" z="0.0" y="-1873.996102133222"/>
  </node>
  <node id="16314" label="Q9QZF2" cy:nodeId="4737">
    <graphics x="-2191.5384563400485" z="0.0" y="-1827.765389242597"/>
  </node>
  <node id="16313" label="Q812A2" cy:nodeId="4738">
    <graphics x="-1761.9449944888224" z="0.0" y="-3074.144039826925"/>
  </node>
  <node id="16312" label="Q9Z0E0" cy:nodeId="4739">
    <graphics x="1710.6208753031997" z="0.0" y="-4357.54414233135"/>
  </node>
  <node id="16311" label="Q4KMM3" cy:nodeId="4740">
    <graphics x="1736.6375989360122" z="0.0" y="-4297.64765795635"/>
  </node>
  <node id="16310" label="Q9CR95" cy:nodeId="4741">
    <graphics x="828.5853528422622" z="0.0" y="-5039.26484545635"/>
  </node>
  <node id="16309" label="Q60737" cy:nodeId="4742">
    <graphics x="-1754.9655023013224" z="0.0" y="-1633.9425530825727"/>
  </node>
  <node id="16308" label="P80560" cy:nodeId="4743">
    <graphics x="-1293.1981201171875" z="0.0" y="-1934.69287109375"/>
  </node>
  <node id="16307" label="P35802" cy:nodeId="4744">
    <graphics x="-1054.7752643630765" z="0.0" y="-3269.564208984375"/>
  </node>
  <node id="16306" label="Q9EQZ6" cy:nodeId="4745">
    <graphics x="-1344.4100341796875" z="0.0" y="-2698.02290101899"/>
  </node>
  <node id="16305" label="P23927" cy:nodeId="4746">
    <graphics x="-1242.46728515625" z="0.0" y="-1895.7645263671875"/>
  </node>
  <node id="16304" label="Q9QYX7" cy:nodeId="4747">
    <graphics x="-1219.409912109375" z="0.0" y="-2738.637891253365"/>
  </node>
  <node id="16303" label="Q03137" cy:nodeId="4748">
    <graphics x="-1203.54052734375" z="0.0" y="-1845.0338134765625"/>
  </node>
  <node id="16302" label="P58771" cy:nodeId="4749">
    <graphics x="-1179.070068359375" z="0.0" y="-1785.956787109375"/>
  </node>
  <node id="16301" label="Q8VHW2" cy:nodeId="4750">
    <graphics x="-1040.6671100662015" z="0.0" y="-3218.44384765625"/>
  </node>
  <node id="16300" label="O54774" cy:nodeId="4751">
    <graphics x="865.4214124125747" z="0.0" y="-4975.4625993626"/>
  </node>
  <node id="16299" label="Q9DB73" cy:nodeId="4752">
    <graphics x="5236.3046875" z="0.0" y="-1671.3562247327627"/>
  </node>
  <node id="16298" label="O88342" cy:nodeId="4753">
    <graphics x="-2297.518906636886" z="0.0" y="-2462.365938273772"/>
  </node>
  <node id="16297" label="Q9R0P5" cy:nodeId="4754">
    <graphics x="1802.8484357936504" z="0.0" y="-2816.262939453125"/>
  </node>
  <node id="16296" label="Q9R1V4" cy:nodeId="4755">
    <graphics x="-1241.4013671875" z="0.0" y="-1110.4376220703125"/>
  </node>
  <node id="16295" label="Q00493" cy:nodeId="4756">
    <graphics x="-2179.5125774337985" z="0.0" y="-1778.9742515472844"/>
  </node>
</graph>
