# Supplementary material for: APP Is a Context-Sensitive Regulator of the Hippocampal Presynaptic Active Zone
Source: PLOS journal article supplement (doi:10.1371/journal.pcbi.1004832), 2016-04-19
Supplement: S6 (10.1371/journal.pcbi.1004832.s006) [file journal.pcbi.1004832.s006.cys › CytoscapeSession-2016_01_22-10_07/views/8163-24540-Communities.xgmml]

<?xml version="1.0" encoding="UTF-8" standalone="yes"?>
<graph id="24540" label="Communities" cy:view="1" cy:networkId="8163" cy:visualStyle="Localization" cy:rendererId="org.cytoscape.ding" cy:documentVersion="3.0" xmlns:dc="http://purl.org/dc/elements/1.1/" xmlns:xlink="http://www.w3.org/1999/xlink" xmlns:rdf="http://www.w3.org/1999/02/22-rdf-syntax-ns#" xmlns:cy="http://www.cytoscape.org" xmlns="http://www.cs.rpi.edu/XGMML">
  <graphics>
    <att name="NETWORK_NODE_SELECTION" value="true" type="string"/>
    <att name="NETWORK_CENTER_X_LOCATION" value="4357.081913818057" type="string"/>
    <att name="NETWORK_WIDTH" value="606.0" type="string"/>
    <att name="NETWORK_CENTER_Z_LOCATION" value="0.0" type="string"/>
    <att name="NETWORK_CENTER_Y_LOCATION" value="4311.062802347341" type="string"/>
    <att name="NETWORK_TITLE" value="Communities" type="string"/>
    <att name="NETWORK_EDGE_SELECTION" value="true" type="string"/>
    <att name="NETWORK_DEPTH" value="0.0" type="string"/>
    <att name="NETWORK_SCALE_FACTOR" value="0.11930644965562721" type="string"/>
    <att name="NETWORK_HEIGHT" value="702.0" type="string"/>
  </graphics>
  <node id="25154" label="Q9CQZ5" cy:nodeId="8175">
    <graphics x="6654.73095703125" z="0.0" y="4279.696896152064"/>
  </node>
  <node id="25153" label="Q9D6J6" cy:nodeId="8176">
    <graphics x="6634.89794921875" z="0.0" y="4251.503536777064"/>
  </node>
  <node id="25152" label="O08749" cy:nodeId="8177">
    <graphics x="4744.129025058314" z="0.0" y="4311.166444502093"/>
  </node>
  <node id="25151" label="Q9D051" cy:nodeId="8178">
    <graphics x="4708.742306308314" z="0.0" y="4311.166444502093"/>
  </node>
  <node id="25150" label="Q9D3D9" cy:nodeId="8179">
    <graphics x="6612.96533203125" z="0.0" y="4224.905880527064"/>
  </node>
  <node id="25149" label="O09111" cy:nodeId="8180">
    <graphics x="6589.06103515625" z="0.0" y="4200.069943027064"/>
  </node>
  <node id="25148" label="Q03265" cy:nodeId="8181">
    <graphics x="6563.32568359375" z="0.0" y="4177.131954745814"/>
  </node>
  <node id="25147" label="P68510" cy:nodeId="8182">
    <graphics x="2076.929568538062" z="0.0" y="4806.722659146861"/>
  </node>
  <node id="25146" label="P12382" cy:nodeId="8183">
    <graphics x="5057.168087558314" z="0.0" y="4935.756776533343"/>
  </node>
  <node id="25145" label="P35438" cy:nodeId="8184">
    <graphics x="2621.950609330042" z="0.0" y="3714.01378191777"/>
  </node>
  <node id="25144" label="P05202" cy:nodeId="8185">
    <graphics x="4673.493771152064" z="0.0" y="4314.294374189593"/>
  </node>
  <node id="25143" label="Q9QUI0" cy:nodeId="8186">
    <graphics x="2084.332078609851" z="0.0" y="4823.434530820543"/>
  </node>
  <node id="25142" label="Q06335" cy:nodeId="8187">
    <graphics x="2604.246885360579" z="0.0" y="3718.559325649124"/>
  </node>
  <node id="25141" label="P23819" cy:nodeId="8188">
    <graphics x="2586.6516294203225" z="0.0" y="3723.5081415274362"/>
  </node>
  <node id="25140" label="P35436" cy:nodeId="8189">
    <graphics x="2569.174026337624" z="0.0" y="3728.8576462413557"/>
  </node>
  <node id="25139" label="Q9CZU6" cy:nodeId="8190">
    <graphics x="4638.660275058314" z="0.0" y="4320.524842939593"/>
  </node>
  <node id="25138" label="Q9DCD0" cy:nodeId="8191">
    <graphics x="5075.757931308314" z="0.0" y="4905.645936689593"/>
  </node>
  <node id="25137" label="P51863" cy:nodeId="8192">
    <graphics x="4252.369021816686" z="0.0" y="3450.00244140625"/>
  </node>
  <node id="25136" label="Q9Z1G3" cy:nodeId="8193">
    <graphics x="4272.498904629186" z="0.0" y="3471.49462890625"/>
  </node>
  <node id="25135" label="P62259" cy:nodeId="8194">
    <graphics x="2092.1144553352506" z="0.0" y="4839.972923206278"/>
  </node>
  <node id="25134" label="P47757" cy:nodeId="8195">
    <graphics x="3611.398274973403" z="0.0" y="4523.081123262853"/>
  </node>
  <node id="25133" label="Q8C8R3" cy:nodeId="8196">
    <graphics x="2551.823199525346" z="0.0" y="3734.605047317574"/>
  </node>
  <node id="25132" label="P16546" cy:nodeId="8197">
    <graphics x="3611.920221318537" z="0.0" y="4504.8106174621535"/>
  </node>
  <node id="25131" label="P63330" cy:nodeId="8198">
    <graphics x="2100.2726362672784" z="0.0" y="4856.32920316478"/>
  </node>
  <node id="25130" label="Q76MZ3" cy:nodeId="8199">
    <graphics x="2108.802362786918" z="0.0" y="4872.494832620534"/>
  </node>
  <node id="25129" label="Q9CQZ6" cy:nodeId="8200">
    <graphics x="6535.90966796875" z="0.0" y="4156.234005527064"/>
  </node>
  <node id="25128" label="Q9CQ54" cy:nodeId="8201">
    <graphics x="6506.974609375" z="0.0" y="4137.495724277064"/>
  </node>
  <node id="25127" label="Q9DCT2" cy:nodeId="8202">
    <graphics x="6476.6904296875" z="0.0" y="4121.030880527064"/>
  </node>
  <node id="25126" label="Q9CQ69" cy:nodeId="8203">
    <graphics x="6445.23388671875" z="0.0" y="4106.925900058314"/>
  </node>
  <node id="25125" label="P08249" cy:nodeId="8204">
    <graphics x="4604.513302402064" z="0.0" y="4329.809510908343"/>
  </node>
  <node id="25124" label="Q9D6R2" cy:nodeId="8205">
    <graphics x="4571.320431308314" z="0.0" y="4342.075624189593"/>
  </node>
  <node id="25123" label="P54071" cy:nodeId="8206">
    <graphics x="4539.341915683314" z="0.0" y="4357.227479658343"/>
  </node>
  <node id="25122" label="P06151" cy:nodeId="8207">
    <graphics x="5091.613400058314" z="0.0" y="4874.010194502093"/>
  </node>
  <node id="25121" label="Q9DB20" cy:nodeId="8208">
    <graphics x="6412.79052734375" z="0.0" y="4095.2735563083143"/>
  </node>
  <node id="25120" label="Q9CQH3" cy:nodeId="8209">
    <graphics x="6379.55029296875" z="0.0" y="4086.1392789645643"/>
  </node>
  <node id="25119" label="Q3UHD9" cy:nodeId="8210">
    <graphics x="2117.6991823261455" z="0.0" y="4888.461373018723"/>
  </node>
  <node id="25118" label="Q9Z2H5" cy:nodeId="8211">
    <graphics x="3612.024624212386" z="0.0" y="4486.532955953187"/>
  </node>
  <node id="25117" label="Q6P9K8" cy:nodeId="8212">
    <graphics x="2993.2350888340775" z="0.0" y="5270.312053972901"/>
  </node>
  <node id="25116" label="O88952" cy:nodeId="8213">
    <graphics x="2534.608206218381" z="0.0" y="3740.7473445785126"/>
  </node>
  <node id="25115" label="P19783" cy:nodeId="8214">
    <graphics x="6345.70849609375" z="0.0" y="4079.5758024020643"/>
  </node>
  <node id="25114" label="Q8BK64" cy:nodeId="8215">
    <graphics x="4084.666015625" z="0.0" y="6008.639767245814"/>
  </node>
  <node id="25113" label="P63038" cy:nodeId="8216">
    <graphics x="4022.95068359375" z="0.0" y="5553.036739902064"/>
  </node>
  <node id="25112" label="Q8BH95" cy:nodeId="8217">
    <graphics x="5313.724978847936" z="0.0" y="5428.368711747907"/>
  </node>
  <node id="25111" label="Q9CZ13" cy:nodeId="8218">
    <graphics x="6311.46337890625" z="0.0" y="4075.6221891208143"/>
  </node>
  <node id="25110" label="Q9D0M3" cy:nodeId="8219">
    <graphics x="6277.0166015625" z="0.0" y="4074.3018766208143"/>
  </node>
  <node id="25109" label="Q99LC3" cy:nodeId="8220">
    <graphics x="6242.5693359375" z="0.0" y="4075.6221891208143"/>
  </node>
  <node id="25108" label="Q99LY9" cy:nodeId="8221">
    <graphics x="6208.32421875" z="0.0" y="4079.5758024020643"/>
  </node>
  <node id="25107" label="Q8BMF4" cy:nodeId="8222">
    <graphics x="4508.827267245814" z="0.0" y="4375.146424970843"/>
  </node>
  <node id="25106" label="Q05920" cy:nodeId="8223">
    <graphics x="4480.015743808314" z="0.0" y="4395.692323408343"/>
  </node>
  <node id="25105" label="P63085" cy:nodeId="8224">
    <graphics x="2126.9584506921947" z="0.0" y="4904.220489730204"/>
  </node>
  <node id="25104" label="P61027" cy:nodeId="8225">
    <graphics x="2757.245531254869" z="0.0" y="5289.223952906276"/>
  </node>
  <node id="25103" label="Q61598" cy:nodeId="8226">
    <graphics x="2136.575334491854" z="0.0" y="4919.763956402232"/>
  </node>
  <node id="25102" label="P56480" cy:nodeId="8227">
    <graphics x="6174.482421875" z="0.0" y="4086.1392789645643"/>
  </node>
  <node id="25101" label="P17742" cy:nodeId="8228">
    <graphics x="4348.259884433314" z="0.0" y="4841.096620283343"/>
  </node>
  <node id="25100" label="P68404" cy:nodeId="8229">
    <graphics x="2146.544813654526" z="0.0" y="4935.083659252667"/>
  </node>
  <node id="25099" label="P67778" cy:nodeId="8230">
    <graphics x="6141.2421875" z="0.0" y="4095.2735563083143"/>
  </node>
  <node id="25098" label="Q9JLJ2" cy:nodeId="8231">
    <graphics x="5586.445681972936" z="0.0" y="6072.696836747907"/>
  </node>
  <node id="25097" label="Q91VR2" cy:nodeId="8232">
    <graphics x="6108.798828125" z="0.0" y="4106.925900058314"/>
  </node>
  <node id="25096" label="Q9CPQ8" cy:nodeId="8233">
    <graphics x="6077.34228515625" z="0.0" y="4121.030880527064"/>
  </node>
  <node id="25095" label="Q91VD9" cy:nodeId="8234">
    <graphics x="6047.05810546875" z="0.0" y="4137.495724277064"/>
  </node>
  <node id="25094" label="Q9DCS9" cy:nodeId="8235">
    <graphics x="6018.123046875" z="0.0" y="4156.234005527064"/>
  </node>
  <node id="25093" label="Q9CR68" cy:nodeId="8236">
    <graphics x="5990.70703125" z="0.0" y="4177.131954745814"/>
  </node>
  <node id="25092" label="P52196" cy:nodeId="8237">
    <graphics x="3978.85107421875" z="0.0" y="5545.034298495814"/>
  </node>
  <node id="25091" label="P05132" cy:nodeId="8238">
    <graphics x="2156.8616840527357" z="0.0" y="4950.171601305416"/>
  </node>
  <node id="25090" label="Q9CQJ8" cy:nodeId="8239">
    <graphics x="5964.9716796875" z="0.0" y="4200.067501620814"/>
  </node>
  <node id="25089" label="Q06185" cy:nodeId="8240">
    <graphics x="5941.0673828125" z="0.0" y="4224.905880527064"/>
  </node>
  <node id="25088" label="Q9DC70" cy:nodeId="8241">
    <graphics x="5919.134765625" z="0.0" y="4251.503536777064"/>
  </node>
  <node id="25087" label="Q9D0S9" cy:nodeId="8242">
    <graphics x="5275.759646816686" z="0.0" y="5448.755430497907"/>
  </node>
  <node id="25086" label="Q9D1K2" cy:nodeId="8243">
    <graphics x="4293.991092129186" z="0.0" y="3491.62451171875"/>
  </node>
  <node id="25085" label="Q9Z1G4" cy:nodeId="8244">
    <graphics x="4316.754275722936" z="0.0" y="3510.3056640625"/>
  </node>
  <node id="25084" label="Q9WUM5" cy:nodeId="8245">
    <graphics x="4453.133419589564" z="0.0" y="4418.703553877093"/>
  </node>
  <node id="25083" label="Q9D0K2" cy:nodeId="8246">
    <graphics x="5240.587771816686" z="0.0" y="5473.653379716657"/>
  </node>
  <node id="25082" label="Q9CQN1" cy:nodeId="8247">
    <graphics x="3934.03125" z="0.0" y="5545.034298495814"/>
  </node>
  <node id="25081" label="P63037" cy:nodeId="8248">
    <graphics x="4120.92578125" z="0.0" y="5982.295528964564"/>
  </node>
  <node id="25080" label="Q9DCW4" cy:nodeId="8249">
    <graphics x="5208.742068691686" z="0.0" y="5502.684629716657"/>
  </node>
  <node id="25079" label="Q9CPP6" cy:nodeId="8250">
    <graphics x="5899.3017578125" z="0.0" y="4279.696896152064"/>
  </node>
  <node id="25078" label="P15105" cy:nodeId="8251">
    <graphics x="5374.641482754186" z="0.0" y="6085.760801591657"/>
  </node>
  <node id="25077" label="P46460" cy:nodeId="8252">
    <graphics x="2775.493681485927" z="0.0" y="5290.267419889618"/>
  </node>
  <node id="25076" label="Q08331" cy:nodeId="8253">
    <graphics x="5417.000369472936" z="0.0" y="6093.678770341657"/>
  </node>
  <node id="25075" label="Q9CQ62" cy:nodeId="8254">
    <graphics x="5180.704959316686" z="0.0" y="5535.409727372907"/>
  </node>
  <node id="25074" label="P62897" cy:nodeId="8255">
    <graphics x="5881.68603515625" z="0.0" y="4309.328732089564"/>
  </node>
  <node id="25073" label="Q9D2G2" cy:nodeId="8256">
    <graphics x="4428.389278964564" z="0.0" y="4444.001405439593"/>
  </node>
  <node id="25072" label="Q3UIU2" cy:nodeId="8257">
    <graphics x="5866.3896484375" z="0.0" y="4340.221798495814"/>
  </node>
  <node id="25071" label="P31938" cy:nodeId="8258">
    <graphics x="2167.5205602187143" z="0.0" y="4965.019906564903"/>
  </node>
  <node id="25070" label="P17427" cy:nodeId="8259">
    <graphics x="4340.690310879186" z="0.0" y="3527.4580078125"/>
  </node>
  <node id="25069" label="P17426" cy:nodeId="8260">
    <graphics x="4365.696658535436" z="0.0" y="3543.008544921875"/>
  </node>
  <node id="25068" label="P57746" cy:nodeId="8261">
    <graphics x="4391.666873379186" z="0.0" y="3556.889404296875"/>
  </node>
  <node id="25067" label="P50516" cy:nodeId="8262">
    <graphics x="4418.489139004186" z="0.0" y="3569.042724609375"/>
  </node>
  <node id="25066" label="P70404" cy:nodeId="8263">
    <graphics x="4405.978146152064" z="0.0" y="4471.386659345843"/>
  </node>
  <node id="25065" label="O88441" cy:nodeId="8264">
    <graphics x="5156.902224941686" z="0.0" y="5571.331602372907"/>
  </node>
  <node id="25064" label="Q7TQI3" cy:nodeId="8265">
    <graphics x="3010.98958462535" z="0.0" y="5265.969049321939"/>
  </node>
  <node id="25063" label="P17751" cy:nodeId="8266">
    <graphics x="4587.781368808314" z="0.0" y="5085.976991377093"/>
  </node>
  <node id="25062" label="P09411" cy:nodeId="8267">
    <graphics x="4621.484005527064" z="0.0" y="5096.763124189593"/>
  </node>
  <node id="25061" label="Q9Z1P6" cy:nodeId="8268">
    <graphics x="5853.50341796875" z="0.0" y="4372.194943027064"/>
  </node>
  <node id="25060" label="P63137" cy:nodeId="8269">
    <graphics x="2517.5380327457237" z="0.0" y="3747.281331708433"/>
  </node>
  <node id="25059" label="P62812" cy:nodeId="8270">
    <graphics x="2500.621589839553" z="0.0" y="3754.203597927154"/>
  </node>
  <node id="25058" label="O70325" cy:nodeId="8271">
    <graphics x="5843.10205078125" z="0.0" y="4405.060665683314"/>
  </node>
  <node id="25057" label="P48771" cy:nodeId="8272">
    <graphics x="5835.24755859375" z="0.0" y="4438.628536777064"/>
  </node>
  <node id="25056" label="Q64133" cy:nodeId="8273">
    <graphics x="5137.694217129186" z="0.0" y="5609.906797685407"/>
  </node>
  <node id="25055" label="P47738" cy:nodeId="8274">
    <graphics x="5123.371951504186" z="0.0" y="5650.549375810407"/>
  </node>
  <node id="25054" label="P63005" cy:nodeId="8275">
    <graphics x="3611.7114291560174" z="0.0" y="4468.2576797840775"/>
  </node>
  <node id="25053" label="Q6PER3" cy:nodeId="8276">
    <graphics x="3610.980799639115" z="0.0" y="4449.9943287577835"/>
  </node>
  <node id="25052" label="O70161" cy:nodeId="8277">
    <graphics x="4316.754275722936" z="0.0" y="2796.28759765625"/>
  </node>
  <node id="25051" label="Q9Z1B3" cy:nodeId="8278">
    <graphics x="4707.165408535436" z="0.0" y="2718.630126953125"/>
  </node>
  <node id="25050" label="Q921G7" cy:nodeId="8279">
    <graphics x="5114.153201504186" z="0.0" y="5692.644590654157"/>
  </node>
  <node id="25049" label="Q8BWT1" cy:nodeId="8280">
    <graphics x="5110.177127285436" z="0.0" y="5735.553282060407"/>
  </node>
  <node id="25048" label="Q9CQA3" cy:nodeId="8281">
    <graphics x="5829.9853515625" z="0.0" y="4472.694943027064"/>
  </node>
  <node id="25047" label="P12787" cy:nodeId="8282">
    <graphics x="5827.3466796875" z="0.0" y="4507.066036777064"/>
  </node>
  <node id="25046" label="Q61425" cy:nodeId="8283">
    <graphics x="5111.504275722936" z="0.0" y="5778.625547685407"/>
  </node>
  <node id="25045" label="Q99LC5" cy:nodeId="8284">
    <graphics x="5118.114139004186" z="0.0" y="5821.208067216657"/>
  </node>
  <node id="25044" label="Q8BGH2" cy:nodeId="8285">
    <graphics x="4386.074825839564" z="0.0" y="4500.645448408343"/>
  </node>
  <node id="25043" label="Q99LX0" cy:nodeId="8286">
    <graphics x="6208.32421875" z="0.0" y="4969.028439120814"/>
  </node>
  <node id="25042" label="P62331" cy:nodeId="8287">
    <graphics x="4293.991092129186" z="0.0" y="2814.96875"/>
  </node>
  <node id="25041" label="Q8K1Z0" cy:nodeId="8288">
    <graphics x="5827.3466796875" z="0.0" y="4541.538693027064"/>
  </node>
  <node id="25040" label="P11499" cy:nodeId="8289">
    <graphics x="3791.95654296875" z="0.0" y="5982.295528964564"/>
  </node>
  <node id="25039" label="P05064" cy:nodeId="8290">
    <graphics x="4656.007931308314" z="0.0" y="5104.528260908343"/>
  </node>
  <node id="25038" label="P17710" cy:nodeId="8291">
    <graphics x="4691.083614902064" z="0.0" y="5109.211854658343"/>
  </node>
  <node id="25037" label="P48320" cy:nodeId="8292">
    <graphics x="5625.593631191686" z="0.0" y="6054.686094560407"/>
  </node>
  <node id="25036" label="P61922" cy:nodeId="8293">
    <graphics x="5129.907107754186" z="0.0" y="5862.655821122907"/>
  </node>
  <node id="25035" label="P12023" cy:nodeId="8294">
    <graphics x="2483.8677079837767" z="0.0" y="3761.510529770498"/>
  </node>
  <node id="25034" label="P62814" cy:nodeId="8295">
    <graphics x="4446.049197597936" z="0.0" y="3579.415283203125"/>
  </node>
  <node id="25033" label="Q9WV92" cy:nodeId="8296">
    <graphics x="3609.833117054637" z="0.0" y="4431.752436452272"/>
  </node>
  <node id="25032" label="Q8R5M8" cy:nodeId="8297">
    <graphics x="2467.285132804467" z="0.0" y="3769.1983129765417"/>
  </node>
  <node id="25031" label="O35526" cy:nodeId="8298">
    <graphics x="2450.882520504591" z="0.0" y="3777.262934476683"/>
  </node>
  <node id="25030" label="Q9WV18" cy:nodeId="8299">
    <graphics x="2434.6684333454205" z="0.0" y="3785.7001844904853"/>
  </node>
  <node id="25029" label="P56391" cy:nodeId="8300">
    <graphics x="5829.9853515625" z="0.0" y="4575.910275058314"/>
  </node>
  <node id="25028" label="Q9D172" cy:nodeId="8301">
    <graphics x="5835.24755859375" z="0.0" y="4609.978634433314"/>
  </node>
  <node id="25027" label="Q62442" cy:nodeId="8302">
    <graphics x="2793.7609078991063" z="0.0" y="5290.893718037659"/>
  </node>
  <node id="25026" label="P26443" cy:nodeId="8303">
    <graphics x="4368.835568027064" z="0.0" y="4531.548768720843"/>
  </node>
  <node id="25025" label="Q91Z53" cy:nodeId="8304">
    <graphics x="5662.231814785436" z="0.0" y="6032.000547685407"/>
  </node>
  <node id="25024" label="Q99KJ8" cy:nodeId="8305">
    <graphics x="3608.2689804997244" z="0.0" y="4413.541525243929"/>
  </node>
  <node id="25023" label="O08788" cy:nodeId="8306">
    <graphics x="3606.289206462972" z="0.0" y="4395.371101336821"/>
  </node>
  <node id="25022" label="Q99KI0" cy:nodeId="8307">
    <graphics x="4354.394650058314" z="0.0" y="4563.854921064593"/>
  </node>
  <node id="25021" label="Q9ERS2" cy:nodeId="8308">
    <graphics x="5843.10205078125" z="0.0" y="4643.544064120814"/>
  </node>
  <node id="25020" label="P97807" cy:nodeId="8309">
    <graphics x="4342.865841464564" z="0.0" y="4597.310975752093"/>
  </node>
  <node id="25019" label="Q6PHZ2" cy:nodeId="8310">
    <graphics x="2178.5158781556456" z="0.0" y="4979.620824127384"/>
  </node>
  <node id="25018" label="P60710" cy:nodeId="8311">
    <graphics x="3603.894828398212" z="0.0" y="4377.250649800406"/>
  </node>
  <node id="25017" label="Q02248" cy:nodeId="8312">
    <graphics x="2189.8418982421076" z="0.0" y="4993.966732226967"/>
  </node>
  <node id="25016" label="P05480" cy:nodeId="8313">
    <graphics x="2201.4927082281856" z="0.0" y="5008.050142214213"/>
  </node>
  <node id="25015" label="P51881" cy:nodeId="8314">
    <graphics x="3543.4922557259524" z="0.0" y="4167.10530410511"/>
  </node>
  <node id="25014" label="Q91WD5" cy:nodeId="8315">
    <graphics x="5853.50341796875" z="0.0" y="4676.409786777064"/>
  </node>
  <node id="25013" label="Q8K2B3" cy:nodeId="8316">
    <graphics x="4334.338497714564" z="0.0" y="4631.655214033343"/>
  </node>
  <node id="25012" label="P68369" cy:nodeId="8317">
    <graphics x="3601.08709618505" z="0.0" y="4359.189629618264"/>
  </node>
  <node id="25011" label="Q8VEM8" cy:nodeId="8318">
    <graphics x="5866.3896484375" z="0.0" y="4708.383419589564"/>
  </node>
  <node id="25010" label="Q3ULD5" cy:nodeId="8319">
    <graphics x="5146.703982754186" z="0.0" y="5902.339903154157"/>
  </node>
  <node id="25009" label="Q8R4N0" cy:nodeId="8320">
    <graphics x="5168.250369472936" z="0.0" y="5939.659239091657"/>
  </node>
  <node id="25008" label="P52503" cy:nodeId="8321">
    <graphics x="5881.68603515625" z="0.0" y="4739.276485995814"/>
  </node>
  <node id="25007" label="Q60631" cy:nodeId="8322">
    <graphics x="4272.498904629186" z="0.0" y="2835.0986328125"/>
  </node>
  <node id="25006" label="Q62277" cy:nodeId="8323">
    <graphics x="4474.228396816686" z="0.0" y="3587.963623046875"/>
  </node>
  <node id="25005" label="P62073" cy:nodeId="8324">
    <graphics x="5899.3017578125" z="0.0" y="4768.907833652064"/>
  </node>
  <node id="25004" label="P99029" cy:nodeId="8325">
    <graphics x="5919.134765625" z="0.0" y="4797.103634433314"/>
  </node>
  <node id="25003" label="Q9CQV8" cy:nodeId="8326">
    <graphics x="2213.4622263217047" z="0.0" y="5021.863702465267"/>
  </node>
  <node id="25002" label="Q9CQR4" cy:nodeId="8327">
    <graphics x="6242.5693359375" z="0.0" y="4972.982052402064"/>
  </node>
  <node id="25001" label="P40142" cy:nodeId="8328">
    <graphics x="4361.257443027064" z="0.0" y="4874.010194502093"/>
  </node>
  <node id="25000" label="P63213" cy:nodeId="8329">
    <graphics x="2225.7442043629603" z="0.0" y="5035.400202219439"/>
  </node>
  <node id="24999" label="P62874" cy:nodeId="8330">
    <graphics x="2238.332231086295" z="0.0" y="5048.652575343269"/>
  </node>
  <node id="24998" label="Q9EQ20" cy:nodeId="8331">
    <graphics x="5194.219119472936" z="0.0" y="5974.047910966657"/>
  </node>
  <node id="24997" label="Q99KR7" cy:nodeId="8332">
    <graphics x="5941.0673828125" z="0.0" y="4823.698849277064"/>
  </node>
  <node id="24996" label="O35658" cy:nodeId="8333">
    <graphics x="5964.9716796875" z="0.0" y="4848.537228183314"/>
  </node>
  <node id="24995" label="Q7TMF3" cy:nodeId="8334">
    <graphics x="5990.70703125" z="0.0" y="4871.472286777064"/>
  </node>
  <node id="24994" label="Q9DCX2" cy:nodeId="8335">
    <graphics x="6018.123046875" z="0.0" y="4892.370724277064"/>
  </node>
  <node id="24993" label="Q61735" cy:nodeId="8336">
    <graphics x="2418.6513351769827" z="0.0" y="3794.5056587232125"/>
  </node>
  <node id="24992" label="P97797" cy:nodeId="8337">
    <graphics x="2402.8395870198788" z="0.0" y="3803.674760664891"/>
  </node>
  <node id="24991" label="P50518" cy:nodeId="8338">
    <graphics x="4502.906131191686" z="0.0" y="3594.6494140625"/>
  </node>
  <node id="24990" label="Q8BVE3" cy:nodeId="8339">
    <graphics x="4531.959842129186" z="0.0" y="3599.4462890625"/>
  </node>
  <node id="24989" label="Q9JLB0" cy:nodeId="8340">
    <graphics x="2387.24144270078" z="0.0" y="3813.2027039897202"/>
  </node>
  <node id="24988" label="Q99N28" cy:nodeId="8341">
    <graphics x="2371.8650445438843" z="0.0" y="3823.08451505456"/>
  </node>
  <node id="24987" label="P19536" cy:nodeId="8342">
    <graphics x="6047.05810546875" z="0.0" y="4911.108517245814"/>
  </node>
  <node id="24986" label="Q60864" cy:nodeId="8343">
    <graphics x="3828.21630859375" z="0.0" y="6008.639767245814"/>
  </node>
  <node id="24985" label="Q9QYJ0" cy:nodeId="8344">
    <graphics x="3712.70947265625" z="0.0" y="5738.397579745814"/>
  </node>
  <node id="24984" label="Q68FD5" cy:nodeId="8345">
    <graphics x="4561.265506191686" z="0.0" y="3602.33251953125"/>
  </node>
  <node id="24983" label="Q9R0Q6" cy:nodeId="8346">
    <graphics x="3597.867475476417" z="0.0" y="4341.197468750454"/>
  </node>
  <node id="24982" label="Q9JM76" cy:nodeId="8347">
    <graphics x="3594.23764693349" z="0.0" y="4323.283559212066"/>
  </node>
  <node id="24981" label="Q91YT0" cy:nodeId="8348">
    <graphics x="6077.34228515625" z="0.0" y="4927.576778964564"/>
  </node>
  <node id="24980" label="Q9DCJ5" cy:nodeId="8349">
    <graphics x="6108.798828125" z="0.0" y="4941.678341464564"/>
  </node>
  <node id="24979" label="P60879" cy:nodeId="8350">
    <graphics x="2356.7184191205715" z="0.0" y="3833.3150354952045"/>
  </node>
  <node id="24978" label="P28660" cy:nodeId="8351">
    <graphics x="4252.369021816686" z="0.0" y="2856.591064453125"/>
  </node>
  <node id="24977" label="O08756" cy:nodeId="8352">
    <graphics x="5224.217654629186" z="0.0" y="6004.984922685407"/>
  </node>
  <node id="24976" label="Q99JY0" cy:nodeId="8353">
    <graphics x="5257.790408535436" z="0.0" y="6032.000547685407"/>
  </node>
  <node id="24975" label="P04925" cy:nodeId="8354">
    <graphics x="2251.219735466817" z="0.0" y="5061.613904019088"/>
  </node>
  <node id="24974" label="P39688" cy:nodeId="8355">
    <graphics x="2264.399990150515" z="0.0" y="5074.277422356163"/>
  </node>
  <node id="24973" label="P49615" cy:nodeId="8356">
    <graphics x="2341.8094730594876" z="0.0" y="3843.888924919076"/>
  </node>
  <node id="24972" label="P03930" cy:nodeId="8357">
    <graphics x="6311.46337890625" z="0.0" y="4972.982052402064"/>
  </node>
  <node id="24971" label="Q9CQ75" cy:nodeId="8358">
    <graphics x="6345.70849609375" z="0.0" y="4969.028439120814"/>
  </node>
  <node id="24970" label="P18872" cy:nodeId="8359">
    <graphics x="2327.1459889192356" z="0.0" y="3854.8006636929454"/>
  </node>
  <node id="24969" label="Q8VDD5" cy:nodeId="8360">
    <graphics x="3028.640226335294" z="0.0" y="5261.221559729769"/>
  </node>
  <node id="24968" label="P51174" cy:nodeId="8361">
    <graphics x="5695.804568691686" z="0.0" y="6004.984922685407"/>
  </node>
  <node id="24967" label="Q8JZQ2" cy:nodeId="8362">
    <graphics x="4151.89892578125" z="0.0" y="5949.900021152064"/>
  </node>
  <node id="24966" label="Q8JZN5" cy:nodeId="8363">
    <graphics x="5725.802615566686" z="0.0" y="5974.047910966657"/>
  </node>
  <node id="24965" label="Q60676" cy:nodeId="8364">
    <graphics x="2312.7356211258348" z="0.0" y="3866.044555824209"/>
  </node>
  <node id="24964" label="Q9CXZ1" cy:nodeId="8365">
    <graphics x="6379.55029296875" z="0.0" y="4962.465450839564"/>
  </node>
  <node id="24963" label="Q8BG51" cy:nodeId="8366">
    <graphics x="3590.199505348379" z="0.0" y="4305.457252170529"/>
  </node>
  <node id="24962" label="P63001" cy:nodeId="8367">
    <graphics x="3535.8993168662814" z="0.0" y="4150.479087166976"/>
  </node>
  <node id="24961" label="Q62351" cy:nodeId="8368">
    <graphics x="5032.050174160436" z="0.0" y="3065.506103515625"/>
  </node>
  <node id="24960" label="P63044" cy:nodeId="8369">
    <graphics x="2277.8661149659756" z="0.0" y="5086.636519922531"/>
  </node>
  <node id="24959" label="P46660" cy:nodeId="8370">
    <graphics x="3046.177800223856" z="0.0" y="5256.0720634142235"/>
  </node>
  <node id="24958" label="Q9JHU4" cy:nodeId="8371">
    <graphics x="3063.5931515730563" z="0.0" y="5250.523248443035"/>
  </node>
  <node id="24957" label="Q9D855" cy:nodeId="8372">
    <graphics x="6412.79052734375" z="0.0" y="4953.330685214564"/>
  </node>
  <node id="24956" label="Q8K3J1" cy:nodeId="8373">
    <graphics x="6445.23388671875" z="0.0" y="4941.678341464564"/>
  </node>
  <node id="24955" label="Q9DB77" cy:nodeId="8374">
    <graphics x="6476.6904296875" z="0.0" y="4927.576778964564"/>
  </node>
  <node id="24954" label="Q91VM9" cy:nodeId="8375">
    <graphics x="5006.442752285436" z="0.0" y="3325.50390625"/>
  </node>
  <node id="24953" label="Q9DC69" cy:nodeId="8376">
    <graphics x="6506.974609375" z="0.0" y="4911.108517245814"/>
  </node>
  <node id="24952" label="Q9JJV2" cy:nodeId="8377">
    <graphics x="3080.8771894658103" z="0.0" y="5244.578011330654"/>
  </node>
  <node id="24951" label="Q9CQQ7" cy:nodeId="8378">
    <graphics x="6535.90966796875" z="0.0" y="4892.370724277064"/>
  </node>
  <node id="24950" label="O88696" cy:nodeId="8379">
    <graphics x="6563.32568359375" z="0.0" y="4871.472286777064"/>
  </node>
  <node id="24949" label="O35129" cy:nodeId="8380">
    <graphics x="6174.482421875" z="0.0" y="4962.465450839564"/>
  </node>
  <node id="24948" label="Q9CZS1" cy:nodeId="8381">
    <graphics x="5751.771853847936" z="0.0" y="5939.659239091657"/>
  </node>
  <node id="24947" label="P70232" cy:nodeId="8382">
    <graphics x="3527.928517920035" z="0.0" y="4134.03067768888"/>
  </node>
  <node id="24946" label="P18052" cy:nodeId="8383">
    <graphics x="3519.5840196917175" z="0.0" y="4117.768661838495"/>
  </node>
  <node id="24945" label="P56379" cy:nodeId="8384">
    <graphics x="6589.06103515625" z="0.0" y="4848.537228183314"/>
  </node>
  <node id="24944" label="Q9D023" cy:nodeId="8385">
    <graphics x="6612.96533203125" z="0.0" y="4823.698849277064"/>
  </node>
  <node id="24943" label="P12367" cy:nodeId="8386">
    <graphics x="2298.5858919770644" z="0.0" y="3877.614731934236"/>
  </node>
  <node id="24942" label="Q61548" cy:nodeId="8387">
    <graphics x="4233.687869472936" z="0.0" y="2879.35400390625"/>
  </node>
  <node id="24941" label="P45878" cy:nodeId="8388">
    <graphics x="4678.487185879186" z="0.0" y="2711.943359375"/>
  </node>
  <node id="24940" label="P63017" cy:nodeId="8389">
    <graphics x="3706.69287109375" z="0.0" y="5782.811642245814"/>
  </node>
  <node id="24939" label="Q9D898" cy:nodeId="8390">
    <graphics x="3098.0208915314374" z="0.0" y="5238.239455526247"/>
  </node>
  <node id="24938" label="Q80T41" cy:nodeId="8391">
    <graphics x="3510.870178059081" z="0.0" y="4101.701528484909"/>
  </node>
  <node id="24937" label="Q9R0K7" cy:nodeId="8392">
    <graphics x="3501.791541699336" z="0.0" y="4085.8376647673877"/>
  </node>
  <node id="24936" label="P13707" cy:nodeId="8393">
    <graphics x="4726.435665683314" z="0.0" y="5110.776796064593"/>
  </node>
  <node id="24935" label="Q64521" cy:nodeId="8394">
    <graphics x="5104.610958652064" z="0.0" y="4841.096620283343"/>
  </node>
  <node id="24934" label="Q9QUH0" cy:nodeId="8395">
    <graphics x="6277.0166015625" z="0.0" y="4974.302364902064"/>
  </node>
  <node id="24933" label="P20108" cy:nodeId="8396">
    <graphics x="6634.89794921875" z="0.0" y="4797.103634433314"/>
  </node>
  <node id="24932" label="Q9JLM8" cy:nodeId="8397">
    <graphics x="4649.433474941686" z="0.0" y="2707.146484375"/>
  </node>
  <node id="24931" label="Q64010" cy:nodeId="8398">
    <graphics x="2284.704187715781" z="0.0" y="3889.5051523222132"/>
  </node>
  <node id="24930" label="P97450" cy:nodeId="8399">
    <graphics x="6654.73095703125" z="0.0" y="4768.907833652064"/>
  </node>
  <node id="24929" label="O88935" cy:nodeId="8400">
    <graphics x="2291.611080515876" z="0.0" y="5098.684745195684"/>
  </node>
  <node id="24928" label="P62823" cy:nodeId="8401">
    <graphics x="2305.6277118463695" z="0.0" y="5110.4158089303"/>
  </node>
  <node id="24927" label="Q99PT1" cy:nodeId="8402">
    <graphics x="2271.09775467425" z="0.0" y="3901.7096101179104"/>
  </node>
  <node id="24926" label="Q99MN9" cy:nodeId="8403">
    <graphics x="5773.318240566686" z="0.0" y="5902.339903154157"/>
  </node>
  <node id="24925" label="Q99JY9" cy:nodeId="8404">
    <graphics x="3115.0153086553964" z="0.0" y="5231.51088979368"/>
  </node>
  <node id="24924" label="P14094" cy:nodeId="8405">
    <graphics x="3492.3528497147113" z="0.0" y="4070.1853517172353"/>
  </node>
  <node id="24923" label="P47754" cy:nodeId="8406">
    <graphics x="3131.851569650773" z="0.0" y="5224.395826484324"/>
  </node>
  <node id="24922" label="Q9CZT8" cy:nodeId="8407">
    <graphics x="2319.9086921924536" z="0.0" y="5121.823587441269"/>
  </node>
  <node id="24921" label="P35486" cy:nodeId="8408">
    <graphics x="5114.648556308314" z="0.0" y="4807.164003095843"/>
  </node>
  <node id="24920" label="P22315" cy:nodeId="8409">
    <graphics x="4176.59033203125" z="0.0" y="5912.494747714564"/>
  </node>
  <node id="24919" label="Q61102" cy:nodeId="8410">
    <graphics x="4194.20556640625" z="0.0" y="5871.281857089564"/>
  </node>
  <node id="24918" label="P62962" cy:nodeId="8411">
    <graphics x="3148.5208858890937" z="0.0" y="5216.8979797035845"/>
  </node>
  <node id="24917" label="P16054" cy:nodeId="8412">
    <graphics x="2257.773695491527" z="0.0" y="3914.2217345216986"/>
  </node>
  <node id="24916" label="P09671" cy:nodeId="8413">
    <graphics x="6672.3466796875" z="0.0" y="4739.276485995814"/>
  </node>
  <node id="24915" label="P18572" cy:nodeId="8414">
    <graphics x="3482.559029158615" z="0.0" y="4054.75275993505"/>
  </node>
  <node id="24914" label="O35465" cy:nodeId="8415">
    <graphics x="3585.7551586550317" z="0.0" y="4287.727853064244"/>
  </node>
  <node id="24913" label="Q8BPN8" cy:nodeId="8416">
    <graphics x="4216.535525722936" z="0.0" y="2903.2900390625"/>
  </node>
  <node id="24912" label="P63082" cy:nodeId="8417">
    <graphics x="4200.985232754186" z="0.0" y="2928.296630859375"/>
  </node>
  <node id="24911" label="Q9CQ92" cy:nodeId="8418">
    <graphics x="5016.815310879186" z="0.0" y="3297.9443359375"/>
  </node>
  <node id="24910" label="Q8K1M6" cy:nodeId="8419">
    <graphics x="4377.113400058314" z="0.0" y="4905.645936689593"/>
  </node>
  <node id="24909" label="Q9DBL1" cy:nodeId="8420">
    <graphics x="5790.115115566686" z="0.0" y="5862.655821122907"/>
  </node>
  <node id="24908" label="P53395" cy:nodeId="8421">
    <graphics x="5121.648556308314" z="0.0" y="4772.475526533343"/>
  </node>
  <node id="24907" label="Q9JHI5" cy:nodeId="8422">
    <graphics x="5801.908084316686" z="0.0" y="5821.208067216657"/>
  </node>
  <node id="24906" label="Q93092" cy:nodeId="8423">
    <graphics x="4761.787716464564" z="0.0" y="5109.211854658343"/>
  </node>
  <node id="24905" label="P52480" cy:nodeId="8424">
    <graphics x="4395.702755527064" z="0.0" y="4935.756776533343"/>
  </node>
  <node id="24904" label="Q9DB05" cy:nodeId="8425">
    <graphics x="3472.4151924636853" z="0.0" y="4039.547945325619"/>
  </node>
  <node id="24903" label="Q61301" cy:nodeId="8426">
    <graphics x="3165.014555888043" z="0.0" y="5209.02126337212"/>
  </node>
  <node id="24902" label="Q9Z2I9" cy:nodeId="8427">
    <graphics x="5125.554806308314" z="0.0" y="4737.305604658343"/>
  </node>
  <node id="24901" label="P50544" cy:nodeId="8428">
    <graphics x="5808.517947597936" z="0.0" y="5778.625547685407"/>
  </node>
  <node id="24900" label="Q61831" cy:nodeId="8429">
    <graphics x="2244.738965405829" z="0.0" y="3927.0349941301497"/>
  </node>
  <node id="24899" label="P63040" cy:nodeId="8430">
    <graphics x="2334.446566797368" z="0.0" y="5132.902125800294"/>
  </node>
  <node id="24898" label="Q923T9" cy:nodeId="8431">
    <graphics x="2232.0003686238606" z="0.0" y="3940.1427003454646"/>
  </node>
  <node id="24897" label="Q920I9" cy:nodeId="8432">
    <graphics x="4620.128299160436" z="0.0" y="2704.26025390625"/>
  </node>
  <node id="24896" label="P06745" cy:nodeId="8433">
    <graphics x="4416.880978183314" z="0.0" y="4964.106385908343"/>
  </node>
  <node id="24895" label="Q3UTJ2" cy:nodeId="8434">
    <graphics x="4590.696658535436" z="0.0" y="2703.296630859375"/>
  </node>
  <node id="24894" label="Q7TPR4" cy:nodeId="8435">
    <graphics x="4815.696658535436" z="0.0" y="3543.008544921875"/>
  </node>
  <node id="24893" label="P61264" cy:nodeId="8436">
    <graphics x="3461.926634773067" z="0.0" y="4024.5788448926887"/>
  </node>
  <node id="24892" label="P70441" cy:nodeId="8437">
    <graphics x="2219.5645547689815" z="0.0" y="3953.5380108669638"/>
  </node>
  <node id="24891" label="P26040" cy:nodeId="8438">
    <graphics x="3181.323969853687" z="0.0" y="5200.76978918275"/>
  </node>
  <node id="24890" label="Q9EP69" cy:nodeId="8439">
    <graphics x="4561.265506191686" z="0.0" y="2704.26025390625"/>
  </node>
  <node id="24889" label="Q62420" cy:nodeId="8440">
    <graphics x="4187.103885097936" z="0.0" y="2954.266845703125"/>
  </node>
  <node id="24888" label="P43024" cy:nodeId="8441">
    <graphics x="6687.64306640625" z="0.0" y="4708.383419589564"/>
  </node>
  <node id="24887" label="P14873" cy:nodeId="8442">
    <graphics x="3197.440614174838" z="0.0" y="5192.147864454125"/>
  </node>
  <node id="24886" label="P09103" cy:nodeId="8443">
    <graphics x="2207.4380154100595" z="0.0" y="3967.2139332628058"/>
  </node>
  <node id="24885" label="P56382" cy:nodeId="8444">
    <graphics x="6700.529296875" z="0.0" y="4676.409786777064"/>
  </node>
  <node id="24884" label="Q3UMR5" cy:nodeId="8445">
    <graphics x="5025.363162441686" z="0.0" y="3269.76513671875"/>
  </node>
  <node id="24883" label="Q91ZA3" cy:nodeId="8446">
    <graphics x="5809.845096035436" z="0.0" y="5735.553282060407"/>
  </node>
  <node id="24882" label="Q61879" cy:nodeId="8447">
    <graphics x="3213.356075867212" z="0.0" y="5183.159989882282"/>
  </node>
  <node id="24881" label="P63101" cy:nodeId="8448">
    <graphics x="2195.6270806728344" z="0.0" y="3981.1633286200827"/>
  </node>
  <node id="24880" label="Q9QWI6" cy:nodeId="8449">
    <graphics x="2184.1379159355556" z="0.0" y="3995.3789152713694"/>
  </node>
  <node id="24879" label="Q8R001" cy:nodeId="8450">
    <graphics x="3229.062046965053" z="0.0" y="5173.81085719126"/>
  </node>
  <node id="24878" label="Q9DBF1" cy:nodeId="8451">
    <graphics x="5294.428103847936" z="0.0" y="6054.686094560407"/>
  </node>
  <node id="24877" label="Q64516" cy:nodeId="8452">
    <graphics x="5126.337521152064" z="0.0" y="4701.926698408343"/>
  </node>
  <node id="24876" label="Q8VDN2" cy:nodeId="8453">
    <graphics x="3451.0988311763167" z="0.0" y="4009.853272595803"/>
  </node>
  <node id="24875" label="Q6PCP5" cy:nodeId="8454">
    <graphics x="5032.050174160436" z="0.0" y="3241.08740234375"/>
  </node>
  <node id="24874" label="P23506" cy:nodeId="8455">
    <graphics x="4590.696658535436" z="0.0" y="3603.29638671875"/>
  </node>
  <node id="24873" label="Q9D6J5" cy:nodeId="8456">
    <graphics x="6710.9306640625" z="0.0" y="4643.544064120814"/>
  </node>
  <node id="24872" label="Q00612" cy:nodeId="8457">
    <graphics x="4440.481564120814" z="0.0" y="4990.473573408343"/>
  </node>
  <node id="24871" label="Q9WTT4" cy:nodeId="8458">
    <graphics x="4174.951053066686" z="0.0" y="2981.089111328125"/>
  </node>
  <node id="24870" label="Q5FWK3" cy:nodeId="8459">
    <graphics x="2172.976518610615" z="0.0" y="4009.8532725958034"/>
  </node>
  <node id="24869" label="Q8CHU3" cy:nodeId="8460">
    <graphics x="4620.128299160436" z="0.0" y="3602.33251953125"/>
  </node>
  <node id="24868" label="P59999" cy:nodeId="8461">
    <graphics x="3244.550328857944" z="0.0" y="5164.1053466839785"/>
  </node>
  <node id="24867" label="Q9CVB6" cy:nodeId="8462">
    <graphics x="3259.812836570528" z="0.0" y="5154.048524694707"/>
  </node>
  <node id="24866" label="Q9CQC7" cy:nodeId="8463">
    <graphics x="6718.78515625" z="0.0" y="4609.978634433314"/>
  </node>
  <node id="24865" label="O88737" cy:nodeId="8464">
    <graphics x="3274.8416029829145" z="0.0" y="5143.645640944395"/>
  </node>
  <node id="24864" label="Q6PH08" cy:nodeId="8465">
    <graphics x="3439.937433851376" z="0.0" y="3995.3789152713694"/>
  </node>
  <node id="24863" label="P39053" cy:nodeId="8466">
    <graphics x="4164.578006191686" z="0.0" y="3008.64892578125"/>
  </node>
  <node id="24862" label="Q6PB66" cy:nodeId="8467">
    <graphics x="4204.1787109375" z="0.0" y="5827.586056308314"/>
  </node>
  <node id="24861" label="P31324" cy:nodeId="8468">
    <graphics x="2162.1487150138655" z="0.0" y="4024.5788448926887"/>
  </node>
  <node id="24860" label="Q8BR92" cy:nodeId="8469">
    <graphics x="3428.4482691140975" z="0.0" y="3981.163328620082"/>
  </node>
  <node id="24859" label="P97772" cy:nodeId="8470">
    <graphics x="3416.637334376873" z="0.0" y="3967.213933262806"/>
  </node>
  <node id="24858" label="Q8CHT0" cy:nodeId="8471">
    <graphics x="5805.869021816686" z="0.0" y="5692.644590654157"/>
  </node>
  <node id="24857" label="P29758" cy:nodeId="8472">
    <graphics x="5796.650271816686" z="0.0" y="5650.549375810407"/>
  </node>
  <node id="24856" label="Q99L47" cy:nodeId="8473">
    <graphics x="3708.70361328125" z="0.0" y="5827.586056308314"/>
  </node>
  <node id="24855" label="Q7TQF7" cy:nodeId="8474">
    <graphics x="4156.030154629186" z="0.0" y="3036.828125"/>
  </node>
  <node id="24854" label="P15116" cy:nodeId="8475">
    <graphics x="3404.510795017951" z="0.0" y="3953.5380108669638"/>
  </node>
  <node id="24853" label="P06837" cy:nodeId="8476">
    <graphics x="3392.0749811630717" z="0.0" y="3940.142700345465"/>
  </node>
  <node id="24852" label="P07901" cy:nodeId="8477">
    <graphics x="3718.67724609375" z="0.0" y="5871.281857089564"/>
  </node>
  <node id="24851" label="P61982" cy:nodeId="8478">
    <graphics x="2151.660157323247" z="0.0" y="4039.547945325619"/>
  </node>
  <node id="24850" label="Q9WUA3" cy:nodeId="8479">
    <graphics x="4796.862911777064" z="0.0" y="5104.528260908343"/>
  </node>
  <node id="24849" label="Q60597" cy:nodeId="8480">
    <graphics x="5123.990841464564" z="0.0" y="4666.618104658343"/>
  </node>
  <node id="24848" label="P05063" cy:nodeId="8481">
    <graphics x="4466.319943027064" z="0.0" y="5014.651796064593"/>
  </node>
  <node id="24847" label="Q8BKZ9" cy:nodeId="8482">
    <graphics x="5118.532345370814" z="0.0" y="4631.655214033343"/>
  </node>
  <node id="24846" label="Q9CPW4" cy:nodeId="8483">
    <graphics x="3289.6287829895637" z="0.0" y="5132.902125800294"/>
  </node>
  <node id="24845" label="P17182" cy:nodeId="8484">
    <graphics x="4494.194454745814" z="0.0" y="5036.451600752093"/>
  </node>
  <node id="24844" label="Q8BMS1" cy:nodeId="8485">
    <graphics x="5782.328006191686" z="0.0" y="5609.906797685407"/>
  </node>
  <node id="24843" label="Q9Z268" cy:nodeId="8486">
    <graphics x="2141.516320628317" z="0.0" y="4054.75275993505"/>
  </node>
  <node id="24842" label="Q8BGD5" cy:nodeId="8487">
    <graphics x="5763.119998379186" z="0.0" y="5571.331602372907"/>
  </node>
  <node id="24841" label="P42125" cy:nodeId="8488">
    <graphics x="5739.317264004186" z="0.0" y="5535.409727372907"/>
  </node>
  <node id="24840" label="Q61290" cy:nodeId="8489">
    <graphics x="5025.363162441686" z="0.0" y="3036.828125"/>
  </node>
  <node id="24839" label="Q8R0S4" cy:nodeId="8490">
    <graphics x="5016.815310879186" z="0.0" y="3008.64892578125"/>
  </node>
  <node id="24838" label="P08226" cy:nodeId="8491">
    <graphics x="3379.3363843811035" z="0.0" y="3927.0349941301497"/>
  </node>
  <node id="24837" label="Q91ZX7" cy:nodeId="8492">
    <graphics x="3366.3016542954047" z="0.0" y="3914.2217345216986"/>
  </node>
  <node id="24836" label="Q8BLK3" cy:nodeId="8493">
    <graphics x="3352.9775951126817" z="0.0" y="3901.7096101179104"/>
  </node>
  <node id="24835" label="P62835" cy:nodeId="8494">
    <graphics x="3339.3711620711515" z="0.0" y="3889.5051523222132"/>
  </node>
  <node id="24834" label="Q6R891" cy:nodeId="8495">
    <graphics x="2131.7225000722206" z="0.0" y="4070.1853517172353"/>
  </node>
  <node id="24833" label="P60766" cy:nodeId="8496">
    <graphics x="2122.283808087596" z="0.0" y="4085.8376647673877"/>
  </node>
  <node id="24832" label="Q99104" cy:nodeId="8497">
    <graphics x="3304.166657594478" z="0.0" y="5121.823587441269"/>
  </node>
  <node id="24831" label="Q62048" cy:nodeId="8498">
    <graphics x="2113.205171727851" z="0.0" y="4101.701528484909"/>
  </node>
  <node id="24830" label="Q9D6M3" cy:nodeId="8499">
    <graphics x="3580.9069268288818" z="0.0" y="4270.104616745098"/>
  </node>
  <node id="24829" label="P47857" cy:nodeId="8500">
    <graphics x="4831.387325839564" z="0.0" y="5096.763124189593"/>
  </node>
  <node id="24828" label="P68368" cy:nodeId="8501">
    <graphics x="3318.4476379405623" z="0.0" y="5110.4158089303"/>
  </node>
  <node id="24827" label="Q922R8" cy:nodeId="8502">
    <graphics x="2104.491330095215" z="0.0" y="4117.768661838495"/>
  </node>
  <node id="24826" label="P10637" cy:nodeId="8503">
    <graphics x="3332.4642692710554" z="0.0" y="5098.684745195684"/>
  </node>
  <node id="24825" label="P55088" cy:nodeId="8504">
    <graphics x="5006.442752285436" z="0.0" y="2981.089111328125"/>
  </node>
  <node id="24824" label="Q9DBG3" cy:nodeId="8505">
    <graphics x="4149.343142910436" z="0.0" y="3065.506103515625"/>
  </node>
  <node id="24823" label="Q6IRU5" cy:nodeId="8506">
    <graphics x="4144.546756191686" z="0.0" y="3094.559814453125"/>
  </node>
  <node id="24822" label="P17183" cy:nodeId="8507">
    <graphics x="4523.886349277064" z="0.0" y="5055.702577314593"/>
  </node>
  <node id="24821" label="Q9QXS6" cy:nodeId="8508">
    <graphics x="3346.209234820956" z="0.0" y="5086.636519922532"/>
  </node>
  <node id="24820" label="Q8BHL5" cy:nodeId="8509">
    <graphics x="4649.433474941686" z="0.0" y="3599.4462890625"/>
  </node>
  <node id="24819" label="O88712" cy:nodeId="8510">
    <graphics x="5460.011111660436" z="0.0" y="6096.331602372907"/>
  </node>
  <node id="24818" label="Q9DCB8" cy:nodeId="8511">
    <graphics x="5110.005489902064" z="0.0" y="4597.310975752093"/>
  </node>
  <node id="24817" label="Q9Z1J3" cy:nodeId="8512">
    <graphics x="5098.476193027064" z="0.0" y="4563.854921064593"/>
  </node>
  <node id="24816" label="Q8BMF3" cy:nodeId="8513">
    <graphics x="5084.035763339564" z="0.0" y="4531.548768720843"/>
  </node>
  <node id="24815" label="Q62425" cy:nodeId="8514">
    <graphics x="6724.04736328125" z="0.0" y="4575.910275058314"/>
  </node>
  <node id="24814" label="P38647" cy:nodeId="8515">
    <graphics x="4206.189453125" z="0.0" y="5782.811642245814"/>
  </node>
  <node id="24813" label="P63011" cy:nodeId="8516">
    <graphics x="2349.2337468040173" z="0.0" y="5143.645640944395"/>
  </node>
  <node id="24812" label="Q60598" cy:nodeId="8517">
    <graphics x="3359.675359636417" z="0.0" y="5074.277422356163"/>
  </node>
  <node id="24811" label="P61161" cy:nodeId="8518">
    <graphics x="3372.855614320115" z="0.0" y="5061.613904019088"/>
  </node>
  <node id="24810" label="Q9Z0X1" cy:nodeId="8519">
    <graphics x="5066.796017245814" z="0.0" y="4500.645448408343"/>
  </node>
  <node id="24809" label="Q8VDP6" cy:nodeId="8520">
    <graphics x="4531.959842129186" z="0.0" y="2707.146484375"/>
  </node>
  <node id="24808" label="Q99L43" cy:nodeId="8521">
    <graphics x="5036.847049160436" z="0.0" y="3212.033447265625"/>
  </node>
  <node id="24807" label="Q8CAQ8" cy:nodeId="8522">
    <graphics x="5046.892696933314" z="0.0" y="4471.386659345843"/>
  </node>
  <node id="24806" label="Q9JLZ3" cy:nodeId="8523">
    <graphics x="5711.280154629186" z="0.0" y="5502.684629716657"/>
  </node>
  <node id="24805" label="P17665" cy:nodeId="8524">
    <graphics x="6726.68603515625" z="0.0" y="4541.538693027064"/>
  </node>
  <node id="24804" label="Q60931" cy:nodeId="8525">
    <graphics x="5024.481564120814" z="0.0" y="4444.001405439593"/>
  </node>
  <node id="24803" label="Q8QZT1" cy:nodeId="8526">
    <graphics x="5679.434451504186" z="0.0" y="5473.653379716657"/>
  </node>
  <node id="24802" label="Q8VD37" cy:nodeId="8527">
    <graphics x="4994.289431972936" z="0.0" y="2954.266845703125"/>
  </node>
  <node id="24801" label="P16858" cy:nodeId="8528">
    <graphics x="4865.089962558314" z="0.0" y="5085.976991377093"/>
  </node>
  <node id="24800" label="P62746" cy:nodeId="8529">
    <graphics x="3385.743118700637" z="0.0" y="5048.652575343269"/>
  </node>
  <node id="24799" label="P11627" cy:nodeId="8530">
    <graphics x="3325.4894578098674" z="0.0" y="3877.614731934236"/>
  </node>
  <node id="24798" label="P13595" cy:nodeId="8531">
    <graphics x="3311.339728661097" z="0.0" y="3866.044555824209"/>
  </node>
  <node id="24797" label="Q8BKX1" cy:nodeId="8532">
    <graphics x="4840.703494472936" z="0.0" y="3527.4580078125"/>
  </node>
  <node id="24796" label="O70589" cy:nodeId="8533">
    <graphics x="3296.9293608676967" z="0.0" y="3854.8006636929454"/>
  </node>
  <node id="24795" label="P16330" cy:nodeId="8534">
    <graphics x="2096.1468318668967" z="0.0" y="4134.03067768888"/>
  </node>
  <node id="24794" label="P03995" cy:nodeId="8535">
    <graphics x="2812.037674893466" z="0.0" y="5291.102520419034"/>
  </node>
  <node id="24793" label="P99024" cy:nodeId="8536">
    <graphics x="3398.3311454239715" z="0.0" y="5035.40020221944"/>
  </node>
  <node id="24792" label="Q9Z218" cy:nodeId="8537">
    <graphics x="3282.2658767274443" z="0.0" y="3843.888924919076"/>
  </node>
  <node id="24791" label="P84091" cy:nodeId="8538">
    <graphics x="4141.660037441686" z="0.0" y="3123.865234375"/>
  </node>
  <node id="24790" label="Q9QXJ1" cy:nodeId="8539">
    <graphics x="2088.1760329206504" z="0.0" y="4150.479087166976"/>
  </node>
  <node id="24789" label="P68033" cy:nodeId="8540">
    <graphics x="3410.613123465227" z="0.0" y="5021.863702465267"/>
  </node>
  <node id="24788" label="Q9R0Y5" cy:nodeId="8541">
    <graphics x="4328.880489902064" z="0.0" y="4666.618104658343"/>
  </node>
  <node id="24787" label="P47802" cy:nodeId="8542">
    <graphics x="5644.262576504186" z="0.0" y="5448.755430497907"/>
  </node>
  <node id="24786" label="Q6PIE5" cy:nodeId="8543">
    <graphics x="3267.3569306663603" z="0.0" y="3833.3150354952045"/>
  </node>
  <node id="24785" label="P70414" cy:nodeId="8544">
    <graphics x="3252.2103052430475" z="0.0" y="3823.08451505456"/>
  </node>
  <node id="24784" label="P28652" cy:nodeId="8545">
    <graphics x="2080.58309406098" z="0.0" y="4167.105304105109"/>
  </node>
  <node id="24783" label="Q99K85" cy:nodeId="8546">
    <graphics x="5503.021853847936" z="0.0" y="6093.678770341657"/>
  </node>
  <node id="24782" label="P17156" cy:nodeId="8547">
    <graphics x="3736.29345703125" z="0.0" y="5912.494747714564"/>
  </node>
  <node id="24781" label="P62204" cy:nodeId="8548">
    <graphics x="2073.3719788471735" z="0.0" y="4183.900649519057"/>
  </node>
  <node id="24780" label="P68254" cy:nodeId="8549">
    <graphics x="2066.5464515243043" z="0.0" y="4200.856356138521"/>
  </node>
  <node id="24779" label="Q9DBJ1" cy:nodeId="8550">
    <graphics x="4555.163693027064" z="0.0" y="5072.254335127093"/>
  </node>
  <node id="24778" label="P23818" cy:nodeId="8551">
    <graphics x="3236.833907086152" z="0.0" y="3813.2027039897202"/>
  </node>
  <node id="24777" label="Q68FF6" cy:nodeId="8552">
    <graphics x="2060.1100750582696" z="0.0" y="4217.963572983703"/>
  </node>
  <node id="24776" label="P30999" cy:nodeId="8553">
    <graphics x="2054.066209275904" z="0.0" y="4235.213369985561"/>
  </node>
  <node id="24775" label="P62482" cy:nodeId="8554">
    <graphics x="3221.2357627670535" z="0.0" y="3803.674760664891"/>
  </node>
  <node id="24774" label="Q60996" cy:nodeId="8555">
    <graphics x="2048.4180091111266" z="0.0" y="4252.596742647367"/>
  </node>
  <node id="24773" label="Q9R0N7" cy:nodeId="8556">
    <graphics x="2364.262513216404" z="0.0" y="5154.048524694707"/>
  </node>
  <node id="24772" label="Q62261" cy:nodeId="8557">
    <graphics x="3422.582641558746" z="0.0" y="5008.050142214213"/>
  </node>
  <node id="24771" label="Q925I1" cy:nodeId="8558">
    <graphics x="4200.17333984375" z="0.0" y="5738.397579745814"/>
  </node>
  <node id="24770" label="P48453" cy:nodeId="8559">
    <graphics x="2043.16842295805" z="0.0" y="4270.104616745099"/>
  </node>
  <node id="24769" label="Q4ACU6" cy:nodeId="8560">
    <graphics x="4678.487185879186" z="0.0" y="3594.6494140625"/>
  </node>
  <node id="24768" label="Q8BYM5" cy:nodeId="8561">
    <graphics x="3205.424014609949" z="0.0" y="3794.5056587232125"/>
  </node>
  <node id="24767" label="Q9JIS5" cy:nodeId="8562">
    <graphics x="2379.525020928988" z="0.0" y="5164.1053466839785"/>
  </node>
  <node id="24766" label="P40630" cy:nodeId="8563">
    <graphics x="6726.68603515625" z="0.0" y="4507.066036777064"/>
  </node>
  <node id="24765" label="Q9CS84" cy:nodeId="8564">
    <graphics x="2038.3201911319002" z="0.0" y="4287.727853064245"/>
  </node>
  <node id="24764" label="O08539" cy:nodeId="8565">
    <graphics x="4140.696658535436" z="0.0" y="3153.296630859375"/>
  </node>
  <node id="24763" label="O70318" cy:nodeId="8566">
    <graphics x="3434.233451544824" z="0.0" y="4993.966732226967"/>
  </node>
  <node id="24762" label="Q64332" cy:nodeId="8567">
    <graphics x="2395.013302821879" z="0.0" y="5173.81085719126"/>
  </node>
  <node id="24761" label="P60761" cy:nodeId="8568">
    <graphics x="2033.875844438553" z="0.0" y="4305.457252170529"/>
  </node>
  <node id="24760" label="P00493" cy:nodeId="8569">
    <graphics x="4897.707638339564" z="0.0" y="5072.254335127093"/>
  </node>
  <node id="24759" label="Q9Z0R4" cy:nodeId="8570">
    <graphics x="4980.408084316686" z="0.0" y="2928.296630859375"/>
  </node>
  <node id="24758" label="Q80Y14" cy:nodeId="8571">
    <graphics x="4999.737911777064" z="0.0" y="4418.703553877093"/>
  </node>
  <node id="24757" label="Q5SQX6" cy:nodeId="8572">
    <graphics x="4502.906131191686" z="0.0" y="2711.943359375"/>
  </node>
  <node id="24756" label="Q9CPQ1" cy:nodeId="8573">
    <graphics x="6724.04736328125" z="0.0" y="4472.694943027064"/>
  </node>
  <node id="24755" label="Q3UHL1" cy:nodeId="8574">
    <graphics x="2410.71927391972" z="0.0" y="5183.159989882282"/>
  </node>
  <node id="24754" label="Q60932" cy:nodeId="8575">
    <graphics x="3575.6573406758052" z="0.0" y="4252.596742647366"/>
  </node>
  <node id="24753" label="O08585" cy:nodeId="8576">
    <graphics x="4141.660037441686" z="0.0" y="3182.72802734375"/>
  </node>
  <node id="24752" label="Q9QYR6" cy:nodeId="8577">
    <graphics x="3445.559471631286" z="0.0" y="4979.620824127384"/>
  </node>
  <node id="24751" label="B9EKR1" cy:nodeId="8578">
    <graphics x="3889.9326171875" z="0.0" y="5553.036739902064"/>
  </node>
  <node id="24750" label="O54991" cy:nodeId="8579">
    <graphics x="3847.97021484375" z="0.0" y="5568.785275058314"/>
  </node>
  <node id="24749" label="P45376" cy:nodeId="8580">
    <graphics x="5545.380740566686" z="0.0" y="6085.760801591657"/>
  </node>
  <node id="24748" label="Q62419" cy:nodeId="8581">
    <graphics x="4144.546756191686" z="0.0" y="3212.033447265625"/>
  </node>
  <node id="24747" label="P60469" cy:nodeId="8582">
    <graphics x="3189.4069164415114" z="0.0" y="3785.7001844904853"/>
  </node>
  <node id="24746" label="Q91ZJ5" cy:nodeId="8583">
    <graphics x="4928.984493808314" z="0.0" y="5055.702577314593"/>
  </node>
  <node id="24745" label="P63328" cy:nodeId="8584">
    <graphics x="2029.837702853442" z="0.0" y="4323.283559212066"/>
  </node>
  <node id="24744" label="O55042" cy:nodeId="8585">
    <graphics x="2426.6347356120937" z="0.0" y="5192.147864454125"/>
  </node>
  <node id="24743" label="P28667" cy:nodeId="8586">
    <graphics x="2026.2078743105149" z="0.0" y="4341.197468750454"/>
  </node>
  <node id="24742" label="Q9D8B3" cy:nodeId="8587">
    <graphics x="4964.858279629186" z="0.0" y="2903.2900390625"/>
  </node>
  <node id="24741" label="P01831" cy:nodeId="8588">
    <graphics x="4947.705935879186" z="0.0" y="2879.35400390625"/>
  </node>
  <node id="24740" label="P20357" cy:nodeId="8589">
    <graphics x="3456.5547895682175" z="0.0" y="4965.019906564903"/>
  </node>
  <node id="24739" label="Q3UVX5" cy:nodeId="8590">
    <graphics x="3173.1928292823413" z="0.0" y="3777.262934476683"/>
  </node>
  <node id="24738" label="Q91WC3" cy:nodeId="8591">
    <graphics x="5606.297244472936" z="0.0" y="5428.368711747907"/>
  </node>
  <node id="24737" label="Q8BWF0" cy:nodeId="8592">
    <graphics x="4972.855099277064" z="0.0" y="4395.692323408343"/>
  </node>
  <node id="24736" label="Q8BH04" cy:nodeId="8593">
    <graphics x="4944.043575839564" z="0.0" y="4375.146424970843"/>
  </node>
  <node id="24735" label="Q99MR8" cy:nodeId="8594">
    <graphics x="5566.114627285436" z="0.0" y="5412.801817216657"/>
  </node>
  <node id="24734" label="Q99PJ0" cy:nodeId="8595">
    <graphics x="3156.790216982465" z="0.0" y="3769.1983129765417"/>
  </node>
  <node id="24733" label="Q9D6F9" cy:nodeId="8596">
    <graphics x="4864.639529629186" z="0.0" y="3510.3056640625"/>
  </node>
  <node id="24732" label="P41216" cy:nodeId="8597">
    <graphics x="5524.323611660436" z="0.0" y="5402.291075029157"/>
  </node>
  <node id="24731" label="Q6P1F6" cy:nodeId="8598">
    <graphics x="2022.9882536018818" z="0.0" y="4359.189629618264"/>
  </node>
  <node id="24730" label="P28663" cy:nodeId="8599">
    <graphics x="3140.2076418031556" z="0.0" y="3761.510529770498"/>
  </node>
  <node id="24729" label="P68181" cy:nodeId="8600">
    <graphics x="2020.1805213887196" z="0.0" y="4377.250649800406"/>
  </node>
  <node id="24728" label="Q80VP1" cy:nodeId="8601">
    <graphics x="4929.024783535436" z="0.0" y="2856.591064453125"/>
  </node>
  <node id="24727" label="Q6PIC6" cy:nodeId="8602">
    <graphics x="3123.4537599473792" z="0.0" y="3754.203597927154"/>
  </node>
  <node id="24726" label="Q9R111" cy:nodeId="8603">
    <graphics x="4338.222286777064" z="0.0" y="4807.164003095843"/>
  </node>
  <node id="24725" label="Q9D0F9" cy:nodeId="8604">
    <graphics x="4958.676876620814" z="0.0" y="5036.451600752093"/>
  </node>
  <node id="24724" label="Q62465" cy:nodeId="8605">
    <graphics x="3570.0091405110284" z="0.0" y="4235.213369985561"/>
  </node>
  <node id="24723" label="Q9WUB3" cy:nodeId="8606">
    <graphics x="4326.533321933314" z="0.0" y="4701.926698408343"/>
  </node>
  <node id="24722" label="Q91VZ6" cy:nodeId="8607">
    <graphics x="4908.894900722936" z="0.0" y="2835.0986328125"/>
  </node>
  <node id="24721" label="Q8CHC4" cy:nodeId="8608">
    <graphics x="4707.165408535436" z="0.0" y="3587.963623046875"/>
  </node>
  <node id="24720" label="Q61411" cy:nodeId="8609">
    <graphics x="3106.5373170412086" z="0.0" y="3747.281331708433"/>
  </node>
  <node id="24719" label="Q60875" cy:nodeId="8610">
    <graphics x="2017.78614332396" z="0.0" y="4395.371101336821"/>
  </node>
  <node id="24718" label="O55023" cy:nodeId="8611">
    <graphics x="4735.344607754186" z="0.0" y="3579.415283203125"/>
  </node>
  <node id="24717" label="Q80UU9" cy:nodeId="8612">
    <graphics x="3089.467143568551" z="0.0" y="3740.7473445785126"/>
  </node>
  <node id="24716" label="Q9R0P9" cy:nodeId="8613">
    <graphics x="2830.3144418878255" z="0.0" y="5290.893718037659"/>
  </node>
  <node id="24715" label="P0C0A3" cy:nodeId="8614">
    <graphics x="4887.402224941686" z="0.0" y="2814.96875"/>
  </node>
  <node id="24714" label="Q9WU78" cy:nodeId="8615">
    <graphics x="4474.228396816686" z="0.0" y="2718.630126953125"/>
  </node>
  <node id="24713" label="P50396" cy:nodeId="8616">
    <graphics x="2015.8063692872074" z="0.0" y="4413.541525243929"/>
  </node>
  <node id="24712" label="P62821" cy:nodeId="8617">
    <graphics x="2442.751379933245" z="0.0" y="5200.76978918275"/>
  </node>
  <node id="24711" label="Q9CQI6" cy:nodeId="8618">
    <graphics x="3467.213665734196" z="0.0" y="4950.171601305416"/>
  </node>
  <node id="24710" label="Q9CRB9" cy:nodeId="8619">
    <graphics x="4913.529415683314" z="0.0" y="4357.227479658343"/>
  </node>
  <node id="24709" label="P35279" cy:nodeId="8620">
    <graphics x="2459.0607938988887" z="0.0" y="5209.02126337212"/>
  </node>
  <node id="24708" label="Q9DC28" cy:nodeId="8621">
    <graphics x="2014.242232732295" z="0.0" y="4431.752436452272"/>
  </node>
  <node id="24707" label="Q8VBV7" cy:nodeId="8622">
    <graphics x="2013.0945501478168" z="0.0" y="4449.9943287577835"/>
  </node>
  <node id="24706" label="P47708" cy:nodeId="8623">
    <graphics x="2475.5544638978376" z="0.0" y="5216.8979797035845"/>
  </node>
  <node id="24705" label="Q60605" cy:nodeId="8624">
    <graphics x="3477.530536132406" z="0.0" y="4935.083659252667"/>
  </node>
  <node id="24704" label="P22723" cy:nodeId="8625">
    <graphics x="3072.252150261586" z="0.0" y="3734.605047317574"/>
  </node>
  <node id="24703" label="P62743" cy:nodeId="8626">
    <graphics x="4149.343142910436" z="0.0" y="3241.08740234375"/>
  </node>
  <node id="24702" label="P19246" cy:nodeId="8627">
    <graphics x="3487.500015295078" z="0.0" y="4919.763956402231"/>
  </node>
  <node id="24701" label="Q80U28" cy:nodeId="8628">
    <graphics x="5333.576541347936" z="0.0" y="6072.696836747907"/>
  </node>
  <node id="24700" label="Q61553" cy:nodeId="8629">
    <graphics x="3497.116899094737" z="0.0" y="4904.220489730204"/>
  </node>
  <node id="24699" label="Q810U3" cy:nodeId="8630">
    <graphics x="3054.9013234493077" z="0.0" y="3728.8576462413557"/>
  </node>
  <node id="24698" label="P67871" cy:nodeId="8631">
    <graphics x="2012.3639206309144" z="0.0" y="4468.257679784077"/>
  </node>
  <node id="24697" label="Q8R3V5" cy:nodeId="8632">
    <graphics x="4762.904178066686" z="0.0" y="3569.042724609375"/>
  </node>
  <node id="24696" label="P58281" cy:nodeId="8633">
    <graphics x="4881.550411777064" z="0.0" y="4342.075624189593"/>
  </node>
  <node id="24695" label="P27546" cy:nodeId="8634">
    <graphics x="3506.3761674607863" z="0.0" y="4888.461373018723"/>
  </node>
  <node id="24694" label="P63318" cy:nodeId="8635">
    <graphics x="2012.0507255745458" z="0.0" y="4486.532955953187"/>
  </node>
  <node id="24693" label="P70296" cy:nodeId="8636">
    <graphics x="4327.316036777064" z="0.0" y="4737.305604658343"/>
  </node>
  <node id="24692" label="P56564" cy:nodeId="8637">
    <graphics x="2919.1774304964574" z="0.0" y="3269.1340929410426"/>
  </node>
  <node id="24691" label="P00405" cy:nodeId="8638">
    <graphics x="6718.78515625" z="0.0" y="4438.628536777064"/>
  </node>
  <node id="24690" label="Q9EPJ9" cy:nodeId="8639">
    <graphics x="4446.049197597936" z="0.0" y="2727.17822265625"/>
  </node>
  <node id="24689" label="Q5DQR4" cy:nodeId="8640">
    <graphics x="4156.030154629186" z="0.0" y="3269.76513671875"/>
  </node>
  <node id="24688" label="O35239" cy:nodeId="8641">
    <graphics x="2848.5816683010044" z="0.0" y="5290.267419889618"/>
  </node>
  <node id="24687" label="Q8BW75" cy:nodeId="8642">
    <graphics x="5481.557498379186" z="0.0" y="5396.995664872907"/>
  </node>
  <node id="24686" label="O08599" cy:nodeId="8643">
    <graphics x="2492.223780136159" z="0.0" y="5224.395826484324"/>
  </node>
  <node id="24685" label="Q9QXS1" cy:nodeId="8644">
    <graphics x="3515.272987000014" z="0.0" y="4872.494832620534"/>
  </node>
  <node id="24684" label="P20444" cy:nodeId="8645">
    <graphics x="4418.489139004186" z="0.0" y="2737.55078125"/>
  </node>
  <node id="24683" label="Q60930" cy:nodeId="8646">
    <graphics x="3563.9652747286623" z="0.0" y="4217.963572983703"/>
  </node>
  <node id="24682" label="Q99P72" cy:nodeId="8647">
    <graphics x="3809.4951171875" z="0.0" y="5591.773556308314"/>
  </node>
  <node id="24681" label="O35643" cy:nodeId="8648">
    <graphics x="4164.578006191686" z="0.0" y="3297.9443359375"/>
  </node>
  <node id="24680" label="Q8R191" cy:nodeId="8649">
    <graphics x="4174.951053066686" z="0.0" y="3325.50390625"/>
  </node>
  <node id="24679" label="P61164" cy:nodeId="8650">
    <graphics x="3523.8027135196535" z="0.0" y="4856.32920316478"/>
  </node>
  <node id="24678" label="O55100" cy:nodeId="8651">
    <graphics x="2509.0600411315354" z="0.0" y="5231.51088979368"/>
  </node>
  <node id="24677" label="Q5RJI5" cy:nodeId="8652">
    <graphics x="2012.1551284683947" z="0.0" y="4504.8106174621535"/>
  </node>
  <node id="24676" label="Q8BZ98" cy:nodeId="8653">
    <graphics x="4187.103885097936" z="0.0" y="3352.32666015625"/>
  </node>
  <node id="24675" label="Q61644" cy:nodeId="8654">
    <graphics x="4391.666873379186" z="0.0" y="2749.703857421875"/>
  </node>
  <node id="24674" label="P19096" cy:nodeId="8655">
    <graphics x="4986.550900058314" z="0.0" y="5014.651796064593"/>
  </node>
  <node id="24673" label="P35564" cy:nodeId="8656">
    <graphics x="2012.6770748135286" z="0.0" y="4523.081123262852"/>
  </node>
  <node id="24672" label="Q9CZ42" cy:nodeId="8657">
    <graphics x="5438.464724941686" z="0.0" y="5396.995664872907"/>
  </node>
  <node id="24671" label="Q61490" cy:nodeId="8658">
    <graphics x="4864.639529629186" z="0.0" y="2796.28759765625"/>
  </node>
  <node id="24670" label="P46096" cy:nodeId="8659">
    <graphics x="2526.054458255494" z="0.0" y="5238.239455526246"/>
  </node>
  <node id="24669" label="Q922H2" cy:nodeId="8660">
    <graphics x="4848.358028964564" z="0.0" y="4329.809510908343"/>
  </node>
  <node id="24668" label="P28740" cy:nodeId="8661">
    <graphics x="4887.402224941686" z="0.0" y="3491.62451171875"/>
  </node>
  <node id="24667" label="Q9CWZ7" cy:nodeId="8662">
    <graphics x="3037.42372036661" z="0.0" y="3723.5081415274362"/>
  </node>
  <node id="24666" label="O35857" cy:nodeId="8663">
    <graphics x="4186.3232421875" z="0.0" y="5695.771603183314"/>
  </node>
  <node id="24665" label="Q9D880" cy:nodeId="8664">
    <graphics x="4165.08447265625" z="0.0" y="5656.303341464564"/>
  </node>
  <node id="24664" label="P43406" cy:nodeId="8665">
    <graphics x="4840.703494472936" z="0.0" y="2779.13525390625"/>
  </node>
  <node id="24663" label="Q71LX4" cy:nodeId="8666">
    <graphics x="4908.894900722936" z="0.0" y="3471.49462890625"/>
  </node>
  <node id="24662" label="P48962" cy:nodeId="8667">
    <graphics x="3557.528898262628" z="0.0" y="4200.856356138522"/>
  </node>
  <node id="24661" label="Q8CI94" cy:nodeId="8668">
    <graphics x="4331.222775058314" z="0.0" y="4772.475526533343"/>
  </node>
  <node id="24660" label="Q8K021" cy:nodeId="8669">
    <graphics x="4200.985232754186" z="0.0" y="3378.296875"/>
  </node>
  <node id="24659" label="P63321" cy:nodeId="8670">
    <graphics x="2543.1981603211216" z="0.0" y="5244.578011330654"/>
  </node>
  <node id="24658" label="P48722" cy:nodeId="8671">
    <graphics x="3956.44140625" z="0.0" y="6044.027462558314"/>
  </node>
  <node id="24657" label="O35143" cy:nodeId="8672">
    <graphics x="6710.9306640625" z="0.0" y="4405.060665683314"/>
  </node>
  <node id="24656" label="P84096" cy:nodeId="8673">
    <graphics x="3019.8284644263526" z="0.0" y="3718.559325649124"/>
  </node>
  <node id="24655" label="P26645" cy:nodeId="8674">
    <graphics x="3531.9608944516813" z="0.0" y="4839.972923206278"/>
  </node>
  <node id="24654" label="P28661" cy:nodeId="8675">
    <graphics x="2841.9230359652074" z="0.0" y="3375.4656359097926"/>
  </node>
  <node id="24653" label="P42208" cy:nodeId="8676">
    <graphics x="2716.9230359652074" z="0.0" y="3334.8504015347926"/>
  </node>
  <node id="24652" label="Q9WV34" cy:nodeId="8677">
    <graphics x="3002.12474045689" z="0.0" y="3714.01378191777"/>
  </node>
  <node id="24651" label="Q9Z2Q6" cy:nodeId="8678">
    <graphics x="2716.9230359652074" z="0.0" y="3203.4177843472926"/>
  </node>
  <node id="24650" label="Q9Z2I0" cy:nodeId="8679">
    <graphics x="5039.733279629186" z="0.0" y="3182.72802734375"/>
  </node>
  <node id="24649" label="P18760" cy:nodeId="8680">
    <graphics x="3539.7432711770807" z="0.0" y="4823.434530820543"/>
  </node>
  <node id="24648" label="P40124" cy:nodeId="8681">
    <graphics x="2984.3217899075316" z="0.0" y="3709.8738831342635"/>
  </node>
  <node id="24647" label="O54983" cy:nodeId="8682">
    <graphics x="4789.726443691686" z="0.0" y="3556.889404296875"/>
  </node>
  <node id="24646" label="Q8VDQ8" cy:nodeId="8683">
    <graphics x="4929.024783535436" z="0.0" y="3450.00244140625"/>
  </node>
  <node id="24645" label="P08551" cy:nodeId="8684">
    <graphics x="3547.1457812488698" z="0.0" y="4806.722659146861"/>
  </node>
  <node id="24644" label="Q8K4Z3" cy:nodeId="8685">
    <graphics x="5395.698611660436" z="0.0" y="5402.291075029157"/>
  </node>
  <node id="24643" label="P08553" cy:nodeId="8686">
    <graphics x="3554.1645605127205" z="0.0" y="4789.846031881736"/>
  </node>
  <node id="24642" label="Q61699" cy:nodeId="8687">
    <graphics x="4001.08056640625" z="0.0" y="6040.009884433314"/>
  </node>
  <node id="24641" label="P12960" cy:nodeId="8688">
    <graphics x="2966.4289060244528" z="0.0" y="3706.141790350416"/>
  </node>
  <node id="24640" label="Q7TSJ2" cy:nodeId="8689">
    <graphics x="3560.7959451240713" z="0.0" y="4772.813458725078"/>
  </node>
  <node id="24639" label="O35136" cy:nodeId="8690">
    <graphics x="2948.455428999565" z="0.0" y="3702.8194517408797"/>
  </node>
  <node id="24638" label="O55131" cy:nodeId="8691">
    <graphics x="2841.9230359652074" z="0.0" y="3162.8030382535426"/>
  </node>
  <node id="24637" label="Q9WV55" cy:nodeId="8692">
    <graphics x="2560.482198213875" z="0.0" y="5250.523248443035"/>
  </node>
  <node id="24636" label="Q7TMB8" cy:nodeId="8693">
    <graphics x="4947.705935879186" z="0.0" y="3427.2392578125"/>
  </node>
  <node id="24635" label="Q80TZ3" cy:nodeId="8694">
    <graphics x="4216.535525722936" z="0.0" y="3403.30322265625"/>
  </node>
  <node id="24634" label="O88643" cy:nodeId="8695">
    <graphics x="2013.6162921508487" z="0.0" y="4541.3349360424845"/>
  </node>
  <node id="24633" label="Q8BIJ6" cy:nodeId="8696">
    <graphics x="4137.14013671875" z="0.0" y="5621.261837558314"/>
  </node>
  <node id="24632" label="P55302" cy:nodeId="8697">
    <graphics x="2014.9722902033127" z="0.0" y="4559.562527202105"/>
  </node>
  <node id="24631" label="Q91XV3" cy:nodeId="8698">
    <graphics x="2930.410741094879" z="0.0" y="3699.9086015861885"/>
  </node>
  <node id="24630" label="P48758" cy:nodeId="8699">
    <graphics x="2866.8298185320627" z="0.0" y="5289.223952906276"/>
  </node>
  <node id="24629" label="Q9R1V6" cy:nodeId="8700">
    <graphics x="2912.3042617449096" z="0.0" y="3697.4107593674516"/>
  </node>
  <node id="24628" label="P23242" cy:nodeId="8701">
    <graphics x="2894.145442639672" z="0.0" y="3695.3272289731794"/>
  </node>
  <node id="24627" label="Q9QY76" cy:nodeId="8702">
    <graphics x="2577.8975495630757" z="0.0" y="5256.0720634142235"/>
  </node>
  <node id="24626" label="P57780" cy:nodeId="8703">
    <graphics x="3567.0364734606756" z="0.0" y="4755.633830781475"/>
  </node>
  <node id="24625" label="Q9CR16" cy:nodeId="8704">
    <graphics x="3760.984375" z="0.0" y="5949.900021152064"/>
  </node>
  <node id="24624" label="Q99NE5" cy:nodeId="8705">
    <graphics x="2595.435123451637" z="0.0" y="5261.221559729769"/>
  </node>
  <node id="24623" label="Q8K183" cy:nodeId="8706">
    <graphics x="2885.0493669379393" z="0.0" y="5287.763861783608"/>
  </node>
  <node id="24622" label="P11798" cy:nodeId="8707">
    <graphics x="2016.744361131865" z="0.0" y="4577.754381830614"/>
  </node>
  <node id="24621" label="P48036" cy:nodeId="8708">
    <graphics x="2613.0857651615815" z="0.0" y="5265.969049321939"/>
  </node>
  <node id="24620" label="Q9D1T0" cy:nodeId="8709">
    <graphics x="3775.74365234375" z="0.0" y="5621.261837558314"/>
  </node>
  <node id="24619" label="Q61316" cy:nodeId="8710">
    <graphics x="2903.2308028058983" z="0.0" y="5285.887908697874"/>
  </node>
  <node id="24618" label="O08917" cy:nodeId="8711">
    <graphics x="4815.696658535436" z="0.0" y="2763.585205078125"/>
  </node>
  <node id="24617" label="Q60634" cy:nodeId="8712">
    <graphics x="4789.726443691686" z="0.0" y="2749.703857421875"/>
  </node>
  <node id="24616" label="P97300" cy:nodeId="8713">
    <graphics x="3747.798828125" z="0.0" y="5656.303341464564"/>
  </node>
  <node id="24615" label="Q8CHH9" cy:nodeId="8714">
    <graphics x="4964.858279629186" z="0.0" y="3403.30322265625"/>
  </node>
  <node id="24614" label="Q9CR62" cy:nodeId="8715">
    <graphics x="6700.529296875" z="0.0" y="4372.194943027064"/>
  </node>
  <node id="24613" label="Q91VR7" cy:nodeId="8716">
    <graphics x="3572.882887929589" z="0.0" y="4738.316115918992"/>
  </node>
  <node id="24612" label="Q68FH0" cy:nodeId="8717">
    <graphics x="3578.332136667652" z="0.0" y="4720.869354087887"/>
  </node>
  <node id="24611" label="Q7TMM9" cy:nodeId="8718">
    <graphics x="3583.3813751345824" z="0.0" y="4703.302652601705"/>
  </node>
  <node id="24610" label="Q2PFD7" cy:nodeId="8719">
    <graphics x="4365.696658535436" z="0.0" y="2763.585205078125"/>
  </node>
  <node id="24609" label="Q920P5" cy:nodeId="8720">
    <graphics x="2921.3646353181744" z="0.0" y="5283.597072907753"/>
  </node>
  <node id="24608" label="Q3THE2" cy:nodeId="8721">
    <graphics x="3588.0279675978395" z="0.0" y="4685.625181383202"/>
  </node>
  <node id="24607" label="Q61151" cy:nodeId="8722">
    <graphics x="2018.9315799049302" z="0.0" y="4595.901003671588"/>
  </node>
  <node id="24606" label="Q91VT4" cy:nodeId="8723">
    <graphics x="5353.907596035436" z="0.0" y="5412.801817216657"/>
  </node>
  <node id="24605" label="Q78IK2" cy:nodeId="8724">
    <graphics x="6687.64306640625" z="0.0" y="4340.221798495814"/>
  </node>
  <node id="24604" label="Q8R5C5" cy:nodeId="8725">
    <graphics x="4980.408084316686" z="0.0" y="3378.296875"/>
  </node>
  <node id="24603" label="Q03157" cy:nodeId="8726">
    <graphics x="2875.943762790848" z="0.0" y="3693.659098018641"/>
  </node>
  <node id="24602" label="Q8CGK3" cy:nodeId="8727">
    <graphics x="4103.3876953125" z="0.0" y="5591.773556308314"/>
  </node>
  <node id="24601" label="Q3ULJ0" cy:nodeId="8728">
    <graphics x="5012.389767245814" z="0.0" y="4990.473573408343"/>
  </node>
  <node id="24600" label="Q61206" cy:nodeId="8729">
    <graphics x="2939.4413985062374" z="0.0" y="5280.892550243165"/>
  </node>
  <node id="24599" label="Q9QYA2" cy:nodeId="8730">
    <graphics x="4814.211056308314" z="0.0" y="4320.524842939593"/>
  </node>
  <node id="24598" label="Q8R366" cy:nodeId="8731">
    <graphics x="2857.7087235836802" z="0.0" y="3692.4072372781256"/>
  </node>
  <node id="24597" label="F6SEU4" cy:nodeId="8732">
    <graphics x="2839.449843817197" z="0.0" y="3691.572300230393"/>
  </node>
  <node id="24596" label="Q921M7" cy:nodeId="8733">
    <graphics x="2021.532804781288" z="0.0" y="4613.992920080394"/>
  </node>
  <node id="24595" label="Q8BH59" cy:nodeId="8734">
    <graphics x="3550.7033709397583" z="0.0" y="4183.900649519057"/>
  </node>
  <node id="24594" label="Q8BRT1" cy:nodeId="8735">
    <graphics x="4994.289431972936" z="0.0" y="3352.32666015625"/>
  </node>
  <node id="24593" label="P20152" cy:nodeId="8736">
    <graphics x="3592.2694885084948" z="0.0" y="4667.846168177597"/>
  </node>
  <node id="24592" label="Q9CZW5" cy:nodeId="8737">
    <graphics x="4064.912109375" z="0.0" y="5568.785275058314"/>
  </node>
  <node id="24591" label="Q6P9K9" cy:nodeId="8738">
    <graphics x="2024.5466779060662" z="0.0" y="4632.0206869689555"/>
  </node>
  <node id="24590" label="Q9CQW1" cy:nodeId="8739">
    <graphics x="2630.840260952854" z="0.0" y="5270.312053972901"/>
  </node>
  <node id="24589" label="Q921J2" cy:nodeId="8740">
    <graphics x="2027.9716260195512" z="0.0" y="4649.974893735631"/>
  </node>
  <node id="24588" label="Q9ERD7" cy:nodeId="8741">
    <graphics x="3596.103723767381" z="0.0" y="4649.974893735631"/>
  </node>
  <node id="24587" label="P43006" cy:nodeId="8742">
    <graphics x="4762.904178066686" z="0.0" y="2737.55078125"/>
  </node>
  <node id="24586" label="Q80XN0" cy:nodeId="8743">
    <graphics x="5040.696658535436" z="0.0" y="3153.296630859375"/>
  </node>
  <node id="24585" label="Q9CWS0" cy:nodeId="8744">
    <graphics x="2031.805861278437" z="0.0" y="4667.846168177597"/>
  </node>
  <node id="24584" label="Q8K0T0" cy:nodeId="8745">
    <graphics x="3868.59814453125" z="0.0" y="6028.086544589564"/>
  </node>
  <node id="24583" label="P13020" cy:nodeId="8746">
    <graphics x="3599.5286718808657" z="0.0" y="4632.0206869689555"/>
  </node>
  <node id="24582" label="Q61330" cy:nodeId="8747">
    <graphics x="3726.55908203125" z="0.0" y="5695.771603183314"/>
  </node>
  <node id="24581" label="Q63810" cy:nodeId="8748">
    <graphics x="2036.0473821890923" z="0.0" y="4685.625181383202"/>
  </node>
  <node id="24580" label="Q9Z2W9" cy:nodeId="8749">
    <graphics x="2821.176654735338" z="0.0" y="3691.154722717553"/>
  </node>
  <node id="24579" label="Q04447" cy:nodeId="8750">
    <graphics x="4044.28515625" z="0.0" y="6028.086544589564"/>
  </node>
  <node id="24578" label="Q9Z0P4" cy:nodeId="8751">
    <graphics x="2802.8986950515937" z="0.0" y="3691.154722717553"/>
  </node>
  <node id="24577" label="Q9D8Y0" cy:nodeId="8752">
    <graphics x="2040.6939746523494" z="0.0" y="4703.302652601705"/>
  </node>
  <node id="24576" label="Q9CYT6" cy:nodeId="8753">
    <graphics x="2784.6255059697355" z="0.0" y="3691.572300230393"/>
  </node>
  <node id="24575" label="Q99KB8" cy:nodeId="8754">
    <graphics x="4779.377071933314" z="0.0" y="4314.294374189593"/>
  </node>
  <node id="24574" label="Q9D6K5" cy:nodeId="8755">
    <graphics x="5039.733279629186" z="0.0" y="3123.865234375"/>
  </node>
  <node id="24573" label="Q6URW6" cy:nodeId="8756">
    <graphics x="3602.5425450056437" z="0.0" y="4613.992920080394"/>
  </node>
  <node id="24572" label="Q9R1V7" cy:nodeId="8757">
    <graphics x="2766.3666262032516" z="0.0" y="3692.4072372781256"/>
  </node>
  <node id="24571" label="Q9ES97" cy:nodeId="8758">
    <graphics x="3911.80224609375" z="0.0" y="6040.009884433314"/>
  </node>
  <node id="24570" label="D3YVF0" cy:nodeId="8759">
    <graphics x="3605.143769882002" z="0.0" y="4595.901003671588"/>
  </node>
  <node id="24569" label="Q810U4" cy:nodeId="8760">
    <graphics x="2748.131586996084" z="0.0" y="3693.659098018641"/>
  </node>
  <node id="24568" label="A2CG49" cy:nodeId="8761">
    <graphics x="2045.7432131192797" z="0.0" y="4720.869354087887"/>
  </node>
  <node id="24567" label="P53994" cy:nodeId="8762">
    <graphics x="2648.689342872952" z="0.0" y="5274.248306608371"/>
  </node>
  <node id="24566" label="O89053" cy:nodeId="8763">
    <graphics x="3607.330988655067" z="0.0" y="4577.754381830614"/>
  </node>
  <node id="24565" label="Q9JIA1" cy:nodeId="8764">
    <graphics x="2051.192461857343" z="0.0" y="4738.316115918992"/>
  </node>
  <node id="24564" label="Q91WS0" cy:nodeId="8765">
    <graphics x="6672.3466796875" z="0.0" y="4309.328732089564"/>
  </node>
  <node id="24563" label="Q8K400" cy:nodeId="8766">
    <graphics x="2666.6236935948473" z="0.0" y="5277.775752481041"/>
  </node>
  <node id="24562" label="Q91ZZ3" cy:nodeId="8767">
    <graphics x="2684.6339512806944" z="0.0" y="5280.892550243165"/>
  </node>
  <node id="24561" label="Q9QZF2" cy:nodeId="8768">
    <graphics x="2729.9299071472597" z="0.0" y="3695.3272289731794"/>
  </node>
  <node id="24560" label="Q812A2" cy:nodeId="8769">
    <graphics x="2057.0388763262563" z="0.0" y="4755.633830781475"/>
  </node>
  <node id="24559" label="Q9Z0E0" cy:nodeId="8770">
    <graphics x="4340.690310879186" z="0.0" y="2779.13525390625"/>
  </node>
  <node id="24558" label="Q4KMM3" cy:nodeId="8771">
    <graphics x="5036.847049160436" z="0.0" y="3094.559814453125"/>
  </node>
  <node id="24557" label="Q9CR95" cy:nodeId="8772">
    <graphics x="4735.344607754186" z="0.0" y="2727.17822265625"/>
  </node>
  <node id="24556" label="Q60737" cy:nodeId="8773">
    <graphics x="2063.2794046628605" z="0.0" y="4772.813458725078"/>
  </node>
  <node id="24555" label="P80560" cy:nodeId="8774">
    <graphics x="2702.7107144687575" z="0.0" y="5283.597072907753"/>
  </node>
  <node id="24554" label="P35802" cy:nodeId="8775">
    <graphics x="2711.7710880420227" z="0.0" y="3697.4107593674516"/>
  </node>
  <node id="24553" label="Q9EQZ6" cy:nodeId="8776">
    <graphics x="2069.9107892742113" z="0.0" y="4789.846031881736"/>
  </node>
  <node id="24552" label="P23927" cy:nodeId="8777">
    <graphics x="2957.4516561920846" z="0.0" y="5277.775752481041"/>
  </node>
  <node id="24551" label="Q9QYX7" cy:nodeId="8778">
    <graphics x="2720.8445469810335" z="0.0" y="5285.887908697874"/>
  </node>
  <node id="24550" label="Q03137" cy:nodeId="8779">
    <graphics x="2693.6646086920528" z="0.0" y="3699.9086015861885"/>
  </node>
  <node id="24549" label="P58771" cy:nodeId="8780">
    <graphics x="3609.103059583619" z="0.0" y="4559.562527202106"/>
  </node>
  <node id="24548" label="Q8VHW2" cy:nodeId="8781">
    <graphics x="2675.619920787367" z="0.0" y="3702.8194517408797"/>
  </node>
  <node id="24547" label="O54774" cy:nodeId="8782">
    <graphics x="4233.687869472936" z="0.0" y="3427.2392578125"/>
  </node>
  <node id="24546" label="Q9DB73" cy:nodeId="8783">
    <graphics x="6141.2421875" z="0.0" y="4953.330685214564"/>
  </node>
  <node id="24545" label="O88342" cy:nodeId="8784">
    <graphics x="3610.4590576360833" z="0.0" y="4541.334936042485"/>
  </node>
  <node id="24544" label="Q9R0P5" cy:nodeId="8785">
    <graphics x="5035.990353183314" z="0.0" y="4964.106385908343"/>
  </node>
  <node id="24543" label="Q9R1V4" cy:nodeId="8786">
    <graphics x="2657.646443762479" z="0.0" y="3706.1417903504157"/>
  </node>
  <node id="24542" label="Q00493" cy:nodeId="8787">
    <graphics x="2739.0259828489925" z="0.0" y="5287.763861783608"/>
  </node>
  <node id="25156" label="Q01097" cy:nodeId="8173">
    <graphics x="2639.7535598794007" z="0.0" y="3709.873883134263"/>
  </node>
  <node id="25155" label="Q80Z38" cy:nodeId="8174">
    <graphics x="2975.3860069139805" z="0.0" y="5274.248306608371"/>
  </node>
</graph>
