# Supplementary material for: APP Is a Context-Sensitive Regulator of the Hippocampal Presynaptic Active Zone
Source: PLOS journal article supplement (doi:10.1371/journal.pcbi.1004832), 2016-04-19
Supplement: S6 (10.1371/journal.pcbi.1004832.s006) [file journal.pcbi.1004832.s006.cys › CytoscapeSession-2016_01_22-10_07/views/12194-20533-Localization.xgmml]

<?xml version="1.0" encoding="UTF-8" standalone="yes"?>
<graph id="20533" label="Localization" cy:view="1" cy:networkId="12194" cy:visualStyle="Localization" cy:rendererId="org.cytoscape.ding" cy:documentVersion="3.0" xmlns:dc="http://purl.org/dc/elements/1.1/" xmlns:xlink="http://www.w3.org/1999/xlink" xmlns:rdf="http://www.w3.org/1999/02/22-rdf-syntax-ns#" xmlns:cy="http://www.cytoscape.org" xmlns="http://www.cs.rpi.edu/XGMML">
  <graphics>
    <att name="NETWORK_NODE_SELECTION" value="true" type="string"/>
    <att name="NETWORK_CENTER_X_LOCATION" value="4261.376037597656" type="string"/>
    <att name="NETWORK_WIDTH" value="606.0" type="string"/>
    <att name="NETWORK_CENTER_Z_LOCATION" value="0.0" type="string"/>
    <att name="NETWORK_CENTER_Y_LOCATION" value="4888.253662109375" type="string"/>
    <att name="NETWORK_TITLE" value="Localization" type="string"/>
    <att name="NETWORK_EDGE_SELECTION" value="true" type="string"/>
    <att name="NETWORK_DEPTH" value="0.0" type="string"/>
    <att name="NETWORK_SCALE_FACTOR" value="0.1618092724604975" type="string"/>
    <att name="NETWORK_HEIGHT" value="702.0" type="string"/>
  </graphics>
  <node id="21082" label="Q06185" cy:nodeId="12271">
    <graphics x="4950.169460563892" z="0.0" y="3509.1395872332314"/>
  </node>
  <node id="21081" label="Q9DC70" cy:nodeId="12272">
    <graphics x="4928.403252903027" z="0.0" y="3501.9868047239725"/>
  </node>
  <node id="21080" label="Q9D0S9" cy:nodeId="12273">
    <graphics x="4906.410190218887" z="0.0" y="3495.5653339164287"/>
  </node>
  <node id="21079" label="Q9D1K2" cy:nodeId="12274">
    <graphics x="5689.25390625" z="0.0" y="5988.661708628486"/>
  </node>
  <node id="21078" label="Q9Z1G4" cy:nodeId="12275">
    <graphics x="5677.318359375" z="0.0" y="5955.868251597236"/>
  </node>
  <node id="21077" label="Q9WUM5" cy:nodeId="12276">
    <graphics x="4884.214835959243" z="0.0" y="3489.882346775008"/>
  </node>
  <node id="21076" label="Q9D0K2" cy:nodeId="12277">
    <graphics x="4861.841979505771" z="0.0" y="3484.9441904719906"/>
  </node>
  <node id="21075" label="Q9CQN1" cy:nodeId="12278">
    <graphics x="4839.316608487476" z="0.0" y="3480.7563802985474"/>
  </node>
  <node id="21074" label="P63037" cy:nodeId="12279">
    <graphics x="3296.9708412673076" z="0.0" y="3883.123553619832"/>
  </node>
  <node id="21073" label="Q9DCW4" cy:nodeId="12280">
    <graphics x="4816.663880872688" z="0.0" y="3477.3235935048615"/>
  </node>
  <node id="21072" label="Q9CPP6" cy:nodeId="12281">
    <graphics x="4793.909096870826" z="0.0" y="3474.649664076236"/>
  </node>
  <node id="21071" label="P15105" cy:nodeId="12282">
    <graphics x="4326.6622338369" z="0.0" y="5601.974521840265"/>
  </node>
  <node id="21070" label="P46460" cy:nodeId="12283">
    <graphics x="5662.876953125" z="0.0" y="5924.098720347236"/>
  </node>
  <node id="21069" label="Q08331" cy:nodeId="12284">
    <graphics x="4307.73791743065" z="0.0" y="5579.279209340265"/>
  </node>
  <node id="21068" label="Q9CQ62" cy:nodeId="12285">
    <graphics x="4771.077670675283" z="0.0" y="3472.737578451024"/>
  </node>
  <node id="21067" label="P62897" cy:nodeId="12286">
    <graphics x="4748.195102079015" z="0.0" y="3471.589472185152"/>
  </node>
  <node id="21066" label="Q9D2G2" cy:nodeId="12287">
    <graphics x="4725.286947994519" z="0.0" y="3471.2066275669813"/>
  </node>
  <node id="21065" label="Q3UIU2" cy:nodeId="12288">
    <graphics x="4702.378793910024" z="0.0" y="3471.5894721851528"/>
  </node>
  <node id="21064" label="P31938" cy:nodeId="12289">
    <graphics x="4287.58166743065" z="0.0" y="5557.671299184015"/>
  </node>
  <node id="21063" label="P17427" cy:nodeId="12290">
    <graphics x="5646.017578125" z="0.0" y="5893.543544565986"/>
  </node>
  <node id="21062" label="P17426" cy:nodeId="12291">
    <graphics x="5626.8408203125" z="0.0" y="5864.386806284736"/>
  </node>
  <node id="21061" label="P57746" cy:nodeId="12292">
    <graphics x="5605.46240234375" z="0.0" y="5836.803798472236"/>
  </node>
  <node id="21060" label="P50516" cy:nodeId="12293">
    <graphics x="5582.0107421875" z="0.0" y="5810.960536753486"/>
  </node>
  <node id="21059" label="P70404" cy:nodeId="12294">
    <graphics x="4679.496225313755" z="0.0" y="3472.7375784510255"/>
  </node>
  <node id="21058" label="O88441" cy:nodeId="12295">
    <graphics x="4656.664799118213" z="0.0" y="3474.6496640762384"/>
  </node>
  <node id="21057" label="Q7TQI3" cy:nodeId="12296">
    <graphics x="3254.5182045485576" z="0.0" y="3864.683856354207"/>
  </node>
  <node id="21056" label="P17751" cy:nodeId="12297">
    <graphics x="5556.626953125" z="0.0" y="5787.012294565986"/>
  </node>
  <node id="21055" label="P09411" cy:nodeId="12298">
    <graphics x="5529.4638671875" z="0.0" y="5765.103114878486"/>
  </node>
  <node id="21054" label="Q9Z1P6" cy:nodeId="12299">
    <graphics x="4633.91001511635" z="0.0" y="3477.323593504864"/>
  </node>
  <node id="21053" label="P63137" cy:nodeId="12300">
    <graphics x="6425.328087575174" z="0.0" y="4811.559558617242"/>
  </node>
  <node id="21052" label="P62812" cy:nodeId="12301">
    <graphics x="6410.982872731424" z="0.0" y="4784.954578148492"/>
  </node>
  <node id="21051" label="O70325" cy:nodeId="12302">
    <graphics x="4611.257287501563" z="0.0" y="3480.756380298551"/>
  </node>
  <node id="21050" label="P48771" cy:nodeId="12303">
    <graphics x="4588.731916483268" z="0.0" y="3484.944190471995"/>
  </node>
  <node id="21049" label="Q64133" cy:nodeId="12304">
    <graphics x="4566.359060029796" z="0.0" y="3489.882346775013"/>
  </node>
  <node id="21048" label="P47738" cy:nodeId="12305">
    <graphics x="4544.163705770152" z="0.0" y="3495.5653339164346"/>
  </node>
  <node id="21047" label="P63005" cy:nodeId="12306">
    <graphics x="3280.0907327777645" z="0.0" y="5057.35302734375"/>
  </node>
  <node id="21046" label="Q6PER3" cy:nodeId="12307">
    <graphics x="3267.7118265277645" z="0.0" y="5024.255859375"/>
  </node>
  <node id="21045" label="O70161" cy:nodeId="12308">
    <graphics x="4266.25549555565" z="0.0" y="5537.216709340265"/>
  </node>
  <node id="21044" label="Q9Z1B3" cy:nodeId="12309">
    <graphics x="6395.114708668924" z="0.0" y="4759.228992210992"/>
  </node>
  <node id="21043" label="Q921G7" cy:nodeId="12310">
    <graphics x="4522.170643086012" z="0.0" y="3501.9868047239793"/>
  </node>
  <node id="21042" label="Q8BWT1" cy:nodeId="12311">
    <graphics x="4500.404435425147" z="0.0" y="3509.1395872332387"/>
  </node>
  <node id="21041" label="Q9CQA3" cy:nodeId="12312">
    <graphics x="4478.889392867182" z="0.0" y="3517.015692697847"/>
  </node>
  <node id="21040" label="P12787" cy:nodeId="12313">
    <graphics x="4457.649544972337" z="0.0" y="3525.6063245118935"/>
  </node>
  <node id="21039" label="Q61425" cy:nodeId="12314">
    <graphics x="4436.708613943469" z="0.0" y="3534.9018880346075"/>
  </node>
  <node id="21038" label="Q99LC5" cy:nodeId="12315">
    <graphics x="4416.089988131393" z="0.0" y="3544.8920013063516"/>
  </node>
  <node id="21037" label="Q8BGH2" cy:nodeId="12316">
    <graphics x="4395.816695913083" z="0.0" y="3555.5655066439467"/>
  </node>
  <node id="21036" label="Q99LX0" cy:nodeId="12317">
    <graphics x="4243.82580805565" z="0.0" y="5517.978428090265"/>
  </node>
  <node id="21035" label="P62331" cy:nodeId="12318">
    <graphics x="4220.3614525869" z="0.0" y="5500.017002309015"/>
  </node>
  <node id="21034" label="Q8K1Z0" cy:nodeId="12319">
    <graphics x="4375.911379971902" z="0.0" y="3566.9104831023806"/>
  </node>
  <node id="21033" label="P11499" cy:nodeId="12320">
    <graphics x="4195.93518305565" z="0.0" y="5483.387119496515"/>
  </node>
  <node id="21032" label="P05064" cy:nodeId="12321">
    <graphics x="5500.6845703125" z="0.0" y="5745.364345347236"/>
  </node>
  <node id="21031" label="P17710" cy:nodeId="12322">
    <graphics x="5470.4619140625" z="0.0" y="5727.915614878486"/>
  </node>
  <node id="21030" label="P48320" cy:nodeId="12323">
    <graphics x="3209.9503334548076" z="0.0" y="3852.196551666707"/>
  </node>
  <node id="21029" label="P61922" cy:nodeId="12324">
    <graphics x="4356.396272008613" z="0.0" y="3578.9142597889854"/>
  </node>
  <node id="21028" label="P12023" cy:nodeId="12325">
    <graphics x="6377.778282887674" z="0.0" y="4734.469714867242"/>
  </node>
  <node id="21027" label="P62814" cy:nodeId="12326">
    <graphics x="5438.97802734375" z="0.0" y="5712.860927378486"/>
  </node>
  <node id="21026" label="Q9WV92" cy:nodeId="12327">
    <graphics x="3252.7425882465145" z="0.0" y="4992.2470703125"/>
  </node>
  <node id="21025" label="Q8R5M8" cy:nodeId="12328">
    <graphics x="6359.031212575174" z="0.0" y="4710.760242210992"/>
  </node>
  <node id="21024" label="O35526" cy:nodeId="12329">
    <graphics x="6338.936974293924" z="0.0" y="4688.180652367242"/>
  </node>
  <node id="21023" label="Q9WV18" cy:nodeId="12330">
    <graphics x="6317.564415700174" z="0.0" y="4666.808093773492"/>
  </node>
  <node id="21022" label="P56391" cy:nodeId="12331">
    <graphics x="4337.293167911408" z="0.0" y="3591.56343001521"/>
  </node>
  <node id="21021" label="Q9D172" cy:nodeId="12332">
    <graphics x="4318.623403412672" z="0.0" y="3604.843866270182"/>
  </node>
  <node id="21020" label="Q62442" cy:nodeId="12333">
    <graphics x="5406.4228515625" z="0.0" y="5700.291591440986"/>
  </node>
  <node id="21019" label="P26443" cy:nodeId="12334">
    <graphics x="4300.40783025969" z="0.0" y="3618.7407359993344"/>
  </node>
  <node id="21018" label="Q91Z53" cy:nodeId="12335">
    <graphics x="3164.0973061110576" z="0.0" y="3845.894061432332"/>
  </node>
  <node id="21017" label="Q99KJ8" cy:nodeId="12336">
    <graphics x="3235.2777444965145" z="0.0" y="4961.5283203125"/>
  </node>
  <node id="21016" label="O08788" cy:nodeId="12337">
    <graphics x="3215.4269144183895" z="0.0" y="4932.29443359375"/>
  </node>
  <node id="21015" label="Q99KI0" cy:nodeId="12338">
    <graphics x="4282.666792925909" z="0.0" y="3633.238518170483"/>
  </node>
  <node id="21014" label="Q9ERS2" cy:nodeId="12339">
    <graphics x="4265.42010588875" z="0.0" y="3648.321020608837"/>
  </node>
  <node id="21013" label="P97807" cy:nodeId="12340">
    <graphics x="4248.687031499361" z="0.0" y="3663.971398081596"/>
  </node>
  <node id="21012" label="Q6PHZ2" cy:nodeId="12341">
    <graphics x="4170.62268305565" z="0.0" y="5468.140537465265"/>
  </node>
  <node id="21011" label="P60710" cy:nodeId="12342">
    <graphics x="3193.3170511371395" z="0.0" y="4904.72998046875"/>
  </node>
  <node id="21010" label="Q02248" cy:nodeId="12343">
    <graphics x="4144.50158930565" z="0.0" y="5454.324131215265"/>
  </node>
  <node id="21009" label="P05480" cy:nodeId="12344">
    <graphics x="4117.6534447744" z="0.0" y="5441.980869496515"/>
  </node>
  <node id="21008" label="P51881" cy:nodeId="12345">
    <graphics x="4232.486258469029" z="0.0" y="3680.172171111928"/>
  </node>
  <node id="21007" label="Q91WD5" cy:nodeId="12346">
    <graphics x="4216.835880996271" z="0.0" y="3696.9052455013175"/>
  </node>
  <node id="21006" label="Q8K2B3" cy:nodeId="12347">
    <graphics x="4201.753378557917" z="0.0" y="3714.151932538477"/>
  </node>
  <node id="21005" label="P68369" cy:nodeId="12348">
    <graphics x="3169.0868265277645" z="0.0" y="4879.00927734375"/>
  </node>
  <node id="21004" label="Q8VEM8" cy:nodeId="12349">
    <graphics x="4187.255596386769" z="0.0" y="3731.8929698722577"/>
  </node>
  <node id="21003" label="Q3ULD5" cy:nodeId="12350">
    <graphics x="4173.358726657617" z="0.0" y="3750.1085430252397"/>
  </node>
  <node id="21002" label="Q8R4N0" cy:nodeId="12351">
    <graphics x="4160.0782904026455" z="0.0" y="3768.7783075239768"/>
  </node>
  <node id="21001" label="P52503" cy:nodeId="12352">
    <graphics x="4147.429120176421" z="0.0" y="3787.881411621182"/>
  </node>
  <node id="21000" label="Q60631" cy:nodeId="12353">
    <graphics x="4090.1607689931498" z="0.0" y="5431.148838246515"/>
  </node>
  <node id="20999" label="Q62277" cy:nodeId="12354">
    <graphics x="5372.99072265625" z="0.0" y="5690.282802378486"/>
  </node>
  <node id="20998" label="P62073" cy:nodeId="12355">
    <graphics x="4135.425343489816" z="0.0" y="3807.3965195844703"/>
  </node>
  <node id="20997" label="P99029" cy:nodeId="12356">
    <graphics x="4124.0803670313835" z="0.0" y="3827.3018355256518"/>
  </node>
  <node id="20996" label="Q9CQV8" cy:nodeId="12357">
    <graphics x="4062.1085228993998" z="0.0" y="5421.861240590265"/>
  </node>
  <node id="20995" label="Q9CQR4" cy:nodeId="12358">
    <graphics x="4033.5831322743998" z="0.0" y="5414.146885121515"/>
  </node>
  <node id="20994" label="P40142" cy:nodeId="12359">
    <graphics x="4004.6737084462748" z="0.0" y="5408.030185902765"/>
  </node>
  <node id="20993" label="P63213" cy:nodeId="12360">
    <graphics x="3975.4686303212748" z="0.0" y="5403.529209340265"/>
  </node>
  <node id="20992" label="P62874" cy:nodeId="12361">
    <graphics x="3946.0587182118998" z="0.0" y="5400.658115590265"/>
  </node>
  <node id="20991" label="Q9EQ20" cy:nodeId="12362">
    <graphics x="4113.406861693789" z="0.0" y="3847.5751277439626"/>
  </node>
  <node id="20990" label="Q99KR7" cy:nodeId="12363">
    <graphics x="4103.416748422045" z="0.0" y="3868.1937535560382"/>
  </node>
  <node id="20989" label="O35658" cy:nodeId="12364">
    <graphics x="4094.1211848993316" z="0.0" y="3889.1346845849075"/>
  </node>
  <node id="20988" label="Q7TMF3" cy:nodeId="12365">
    <graphics x="4085.530553085286" z="0.0" y="3910.374532479753"/>
  </node>
  <node id="20987" label="Q9DCX2" cy:nodeId="12366">
    <graphics x="4077.6544476206777" z="0.0" y="3931.8895750377173"/>
  </node>
  <node id="20986" label="Q61735" cy:nodeId="12367">
    <graphics x="6294.984825856424" z="0.0" y="4646.713855492242"/>
  </node>
  <node id="20985" label="P97797" cy:nodeId="12368">
    <graphics x="6271.275353200174" z="0.0" y="4627.966785179742"/>
  </node>
  <node id="20984" label="P50518" cy:nodeId="12369">
    <graphics x="5338.8837890625" z="0.0" y="5682.894618784736"/>
  </node>
  <node id="20983" label="Q8BVE3" cy:nodeId="12370">
    <graphics x="5304.30712890625" z="0.0" y="5678.171962534736"/>
  </node>
  <node id="20982" label="Q9JLB0" cy:nodeId="12371">
    <graphics x="6246.516075856424" z="0.0" y="4610.630359398492"/>
  </node>
  <node id="20981" label="Q99N28" cy:nodeId="12372">
    <graphics x="6220.790489918924" z="0.0" y="4594.762195335992"/>
  </node>
  <node id="20980" label="P19536" cy:nodeId="12373">
    <graphics x="4070.5016651114192" z="0.0" y="3953.6557826985827"/>
  </node>
  <node id="20979" label="Q60864" cy:nodeId="12374">
    <graphics x="3916.5345482900248" z="0.0" y="5399.426181996515"/>
  </node>
  <node id="20978" label="Q9QYJ0" cy:nodeId="12375">
    <graphics x="6194.185509450174" z="0.0" y="4580.417468773492"/>
  </node>
  <node id="20977" label="Q68FD5" cy:nodeId="12376">
    <graphics x="5269.46826171875" z="0.0" y="5676.143153940986"/>
  </node>
  <node id="20976" label="Q9R0Q6" cy:nodeId="12377">
    <graphics x="3142.8895609027645" z="0.0" y="4855.29541015625"/>
  </node>
  <node id="20975" label="Q9JM76" cy:nodeId="12378">
    <graphics x="3114.8907816058895" z="0.0" y="4833.7373046875"/>
  </node>
  <node id="20974" label="Q91YT0" cy:nodeId="12379">
    <graphics x="4064.080194303875" z="0.0" y="3975.648845382723"/>
  </node>
  <node id="20973" label="Q9DCJ5" cy:nodeId="12380">
    <graphics x="4058.397207162454" z="0.0" y="3997.844199642367"/>
  </node>
  <node id="20972" label="P60879" cy:nodeId="12381">
    <graphics x="6166.791954762674" z="0.0" y="4567.643542992242"/>
  </node>
  <node id="20971" label="P28660" cy:nodeId="12382">
    <graphics x="3886.9876732900248" z="0.0" y="5399.837314809015"/>
  </node>
  <node id="20970" label="O08756" cy:nodeId="12383">
    <graphics x="4053.4590508594365" z="0.0" y="4020.2170560958384"/>
  </node>
  <node id="20969" label="Q99JY0" cy:nodeId="12384">
    <graphics x="4049.271240685993" z="0.0" y="4042.7424271141335"/>
  </node>
  <node id="20968" label="P04925" cy:nodeId="12385">
    <graphics x="3857.5091576650248" z="0.0" y="5401.889560902765"/>
  </node>
  <node id="20967" label="P39688" cy:nodeId="12386">
    <graphics x="3828.1903100087748" z="0.0" y="5405.576572621515"/>
  </node>
  <node id="20966" label="P49615" cy:nodeId="12387">
    <graphics x="3799.1217064931498" z="0.0" y="5410.887607777765"/>
  </node>
  <node id="20965" label="P03930" cy:nodeId="12388">
    <graphics x="4045.8384538923065" z="0.0" y="4065.395154728921"/>
  </node>
  <node id="20964" label="Q9CQ75" cy:nodeId="12389">
    <graphics x="4043.1645244636816" z="0.0" y="4088.149938730783"/>
  </node>
  <node id="20963" label="P18872" cy:nodeId="12390">
    <graphics x="3770.3931908681498" z="0.0" y="5417.805576527765"/>
  </node>
  <node id="20962" label="Q8VDD5" cy:nodeId="12391">
    <graphics x="3085.2677347308895" z="0.0" y="4814.47216796875"/>
  </node>
  <node id="20961" label="P51174" cy:nodeId="12392">
    <graphics x="4041.252438838469" z="0.0" y="4110.981364926326"/>
  </node>
  <node id="20960" label="Q8JZQ2" cy:nodeId="12393">
    <graphics x="4040.104332572597" z="0.0" y="4133.863933522594"/>
  </node>
  <node id="20959" label="Q8JZN5" cy:nodeId="12394">
    <graphics x="4039.721487954426" z="0.0" y="4156.772087607091"/>
  </node>
  <node id="20958" label="Q60676" cy:nodeId="12395">
    <graphics x="3742.0933861806498" z="0.0" y="5426.309971059015"/>
  </node>
  <node id="20957" label="Q9CXZ1" cy:nodeId="12396">
    <graphics x="4040.104332572597" z="0.0" y="4179.680241691586"/>
  </node>
  <node id="20956" label="Q8BG51" cy:nodeId="12397">
    <graphics x="4041.2524388384695" z="0.0" y="4202.5628102878545"/>
  </node>
  <node id="20955" label="P63001" cy:nodeId="12398">
    <graphics x="6138.701622731424" z="0.0" y="4556.483875023492"/>
  </node>
  <node id="20954" label="Q62351" cy:nodeId="12399">
    <graphics x="6110.010216481424" z="0.0" y="4546.976550804742"/>
  </node>
  <node id="20953" label="P63044" cy:nodeId="12400">
    <graphics x="5234.5771484375" z="0.0" y="5676.819423472236"/>
  </node>
  <node id="20952" label="P46660" cy:nodeId="12401">
    <graphics x="3054.2084085590145" z="0.0" y="4797.62158203125"/>
  </node>
  <node id="20951" label="Q9JHU4" cy:nodeId="12402">
    <graphics x="3021.9081155902645" z="0.0" y="4783.29150390625"/>
  </node>
  <node id="20950" label="Q9D855" cy:nodeId="12403">
    <graphics x="4043.1645244636825" z="0.0" y="4225.394236483397"/>
  </node>
  <node id="20949" label="Q8K3J1" cy:nodeId="12404">
    <graphics x="4045.838453892308" z="0.0" y="4248.14902048526"/>
  </node>
  <node id="20948" label="Q9DB77" cy:nodeId="12405">
    <graphics x="4049.2712406859946" z="0.0" y="4270.801748100047"/>
  </node>
  <node id="20947" label="Q91VM9" cy:nodeId="12406">
    <graphics x="4053.4590508594383" z="0.0" y="4293.327119118342"/>
  </node>
  <node id="20946" label="Q9DC69" cy:nodeId="12407">
    <graphics x="4058.397207162456" z="0.0" y="4315.699975571813"/>
  </node>
  <node id="20945" label="Q9JJV2" cy:nodeId="12408">
    <graphics x="2988.5709573871395" z="0.0" y="4771.5732421875"/>
  </node>
  <node id="20944" label="Q9CQQ7" cy:nodeId="12409">
    <graphics x="4064.0801943038773" z="0.0" y="4337.895329831457"/>
  </node>
  <node id="20943" label="O88696" cy:nodeId="12410">
    <graphics x="4070.501665111422" z="0.0" y="4359.888392515598"/>
  </node>
  <node id="20942" label="O35129" cy:nodeId="12411">
    <graphics x="3714.3101830556498" z="0.0" y="5436.373447621515"/>
  </node>
  <node id="20941" label="Q9CZS1" cy:nodeId="12412">
    <graphics x="4077.654447620681" z="0.0" y="4381.654600176463"/>
  </node>
  <node id="20940" label="P70232" cy:nodeId="12413">
    <graphics x="6080.814415700174" z="0.0" y="4539.153308617242"/>
  </node>
  <node id="20939" label="P18052" cy:nodeId="12414">
    <graphics x="6051.212853200174" z="0.0" y="4533.041492210992"/>
  </node>
  <node id="20938" label="P56379" cy:nodeId="12415">
    <graphics x="4085.5305530852893" z="0.0" y="4403.169642734428"/>
  </node>
  <node id="20937" label="Q9D023" cy:nodeId="12416">
    <graphics x="4094.1211848993353" z="0.0" y="4424.409490629273"/>
  </node>
  <node id="20936" label="P12367" cy:nodeId="12417">
    <graphics x="3687.1290307118998" z="0.0" y="5447.965732777765"/>
  </node>
  <node id="20935" label="Q61548" cy:nodeId="12418">
    <graphics x="5199.84326171875" z="0.0" y="5680.198329722236"/>
  </node>
  <node id="20934" label="P45878" cy:nodeId="12419">
    <graphics x="3660.6344018056498" z="0.0" y="5461.050693715265"/>
  </node>
  <node id="20933" label="P63017" cy:nodeId="12420">
    <graphics x="3634.9075951650248" z="0.0" y="5475.587803090265"/>
  </node>
  <node id="20932" label="Q9D898" cy:nodeId="12421">
    <graphics x="2954.4088480121395" z="0.0" y="4762.541015625"/>
  </node>
  <node id="20931" label="Q80T41" cy:nodeId="12422">
    <graphics x="6021.306603200174" z="0.0" y="4528.660632835992"/>
  </node>
  <node id="20930" label="Q9R0K7" cy:nodeId="12423">
    <graphics x="5991.195763356424" z="0.0" y="4526.026355492242"/>
  </node>
  <node id="20929" label="P13707" cy:nodeId="12424">
    <graphics x="3117.8128822829326" z="0.0" y="3845.894061432332"/>
  </node>
  <node id="20928" label="Q64521" cy:nodeId="12425">
    <graphics x="4103.416748422049" z="0.0" y="4445.350421658142"/>
  </node>
  <node id="20927" label="Q9QUH0" cy:nodeId="12426">
    <graphics x="3071.9598549391826" z="0.0" y="3852.196551666707"/>
  </node>
  <node id="20926" label="P20108" cy:nodeId="12427">
    <graphics x="4113.406861693793" z="0.0" y="4465.969047470217"/>
  </node>
  <node id="20925" label="Q9JLM8" cy:nodeId="12428">
    <graphics x="3610.0284447743998" z="0.0" y="5491.532139027765"/>
  </node>
  <node id="20924" label="Q64010" cy:nodeId="12429">
    <graphics x="3586.0740990712748" z="0.0" y="5508.834873402765"/>
  </node>
  <node id="20923" label="P97450" cy:nodeId="12430">
    <graphics x="4124.080367031388" z="0.0" y="4486.242339688528"/>
  </node>
  <node id="20922" label="O88935" cy:nodeId="12431">
    <graphics x="5165.4755859375" z="0.0" y="5686.257900034736"/>
  </node>
  <node id="20921" label="P62823" cy:nodeId="12432">
    <graphics x="5131.6806640625" z="0.0" y="5694.962978159736"/>
  </node>
  <node id="20920" label="Q99PT1" cy:nodeId="12433">
    <graphics x="3563.1180443837748" z="0.0" y="5527.441806996515"/>
  </node>
  <node id="20919" label="Q99MN9" cy:nodeId="12434">
    <graphics x="4135.425343489822" z="0.0" y="4506.147655629709"/>
  </node>
  <node id="20918" label="Q99JY9" cy:nodeId="12435">
    <graphics x="2919.6368753558895" z="0.0" y="4756.2509765625"/>
  </node>
  <node id="20917" label="P14094" cy:nodeId="12436">
    <graphics x="5960.982872731424" z="0.0" y="4525.146960960992"/>
  </node>
  <node id="20916" label="P47754" cy:nodeId="12437">
    <graphics x="2884.4747659808895" z="0.0" y="4752.74365234375"/>
  </node>
  <node id="20915" label="Q9CZT8" cy:nodeId="12438">
    <graphics x="5098.66259765625" z="0.0" y="5706.260829722236"/>
  </node>
  <node id="20914" label="P35486" cy:nodeId="12439">
    <graphics x="4147.429120176426" z="0.0" y="4525.662763592997"/>
  </node>
  <node id="20913" label="P22315" cy:nodeId="12440">
    <graphics x="4160.078290402651" z="0.0" y="4544.765867690203"/>
  </node>
  <node id="20912" label="Q61102" cy:nodeId="12441">
    <graphics x="4173.358726657622" z="0.0" y="4563.435632188939"/>
  </node>
  <node id="20911" label="P62962" cy:nodeId="12442">
    <graphics x="2849.1449319965145" z="0.0" y="4752.041015625"/>
  </node>
  <node id="20910" label="P16054" cy:nodeId="12443">
    <graphics x="3541.2318139150248" z="0.0" y="5547.295810902765"/>
  </node>
  <node id="20909" label="P09671" cy:nodeId="12444">
    <graphics x="4187.255596386774" z="0.0" y="4581.651205341921"/>
  </node>
  <node id="20908" label="P18572" cy:nodeId="12445">
    <graphics x="5930.769982106424" z="0.0" y="4526.026355492242"/>
  </node>
  <node id="20907" label="O35465" cy:nodeId="12446">
    <graphics x="4201.7533785579235" z="0.0" y="4599.392242675702"/>
  </node>
  <node id="20906" label="Q8BPN8" cy:nodeId="12447">
    <graphics x="5066.61865234375" z="0.0" y="5720.083095347236"/>
  </node>
  <node id="20905" label="P63082" cy:nodeId="12448">
    <graphics x="5035.74267578125" z="0.0" y="5736.346767222236"/>
  </node>
  <node id="20904" label="Q9CQ92" cy:nodeId="12449">
    <graphics x="4216.835880996277" z="0.0" y="4616.638929712861"/>
  </node>
  <node id="20903" label="Q8K1M6" cy:nodeId="12450">
    <graphics x="5006.2197265625" z="0.0" y="5754.954677378486"/>
  </node>
  <node id="20902" label="Q9DBL1" cy:nodeId="12451">
    <graphics x="4232.486258469036" z="0.0" y="4633.37200410225"/>
  </node>
  <node id="20901" label="P53395" cy:nodeId="12452">
    <graphics x="4248.6870314993685" z="0.0" y="4649.572777132582"/>
  </node>
  <node id="20900" label="Q9JHI5" cy:nodeId="12453">
    <graphics x="4265.4201058887575" z="0.0" y="4665.223154605341"/>
  </node>
  <node id="20899" label="Q93092" cy:nodeId="12454">
    <graphics x="3027.3919838454326" z="0.0" y="3864.683856354207"/>
  </node>
  <node id="20898" label="P52480" cy:nodeId="12455">
    <graphics x="4978.22705078125" z="0.0" y="5775.794032847236"/>
  </node>
  <node id="20897" label="Q9DB05" cy:nodeId="12456">
    <graphics x="5900.659142262674" z="0.0" y="4528.660632835992"/>
  </node>
  <node id="20896" label="Q61301" cy:nodeId="12457">
    <graphics x="2813.8714944965145" z="0.0" y="4754.14794921875"/>
  </node>
  <node id="20895" label="Q9Z2I9" cy:nodeId="12458">
    <graphics x="4282.6667929259165" z="0.0" y="4680.305657043695"/>
  </node>
  <node id="20894" label="P50544" cy:nodeId="12459">
    <graphics x="4300.407830259697" z="0.0" y="4694.803439214842"/>
  </node>
  <node id="20893" label="Q61831" cy:nodeId="12460">
    <graphics x="3520.4825463368998" z="0.0" y="5568.335361684015"/>
  </node>
  <node id="20892" label="P63040" cy:nodeId="12461">
    <graphics x="4951.93408203125" z="0.0" y="5798.740321909736"/>
  </node>
  <node id="20891" label="Q923T9" cy:nodeId="12462">
    <graphics x="3500.9349389150248" z="0.0" y="5590.495517934015"/>
  </node>
  <node id="20890" label="Q920I9" cy:nodeId="12463">
    <graphics x="3482.6488061025248" z="0.0" y="5613.707920277765"/>
  </node>
  <node id="20889" label="P06745" cy:nodeId="12464">
    <graphics x="4927.49755859375" z="0.0" y="5823.654872690986"/>
  </node>
  <node id="20888" label="Q3UTJ2" cy:nodeId="12465">
    <graphics x="3465.6810326650248" z="0.0" y="5637.900303090265"/>
  </node>
  <node id="20887" label="Q7TPR4" cy:nodeId="12466">
    <graphics x="2778.8773538715145" z="0.0" y="4759.05029296875"/>
  </node>
  <node id="20886" label="P61264" cy:nodeId="12467">
    <graphics x="5870.752403981424" z="0.0" y="4533.041492210992"/>
  </node>
  <node id="20885" label="P70441" cy:nodeId="12468">
    <graphics x="3450.0841088368998" z="0.0" y="5662.998447621515"/>
  </node>
  <node id="20884" label="P26040" cy:nodeId="12469">
    <graphics x="2744.3827249652645" z="0.0" y="4766.71728515625"/>
  </node>
  <node id="20883" label="Q9EP69" cy:nodeId="12470">
    <graphics x="3435.9058861806498" z="0.0" y="5688.925205434015"/>
  </node>
  <node id="20882" label="Q62420" cy:nodeId="12471">
    <graphics x="4905.06591796875" z="0.0" y="5850.388271128486"/>
  </node>
  <node id="20881" label="P43024" cy:nodeId="12472">
    <graphics x="4318.623403412679" z="0.0" y="4708.700308943995"/>
  </node>
  <node id="20880" label="P14873" cy:nodeId="12473">
    <graphics x="2710.6068460590145" z="0.0" y="4777.10107421875"/>
  </node>
  <node id="20879" label="P09103" cy:nodeId="12474">
    <graphics x="3423.1905541493998" z="0.0" y="5715.599033559015"/>
  </node>
  <node id="20878" label="P56382" cy:nodeId="12475">
    <graphics x="4337.293167911415" z="0.0" y="4721.980745198966"/>
  </node>
  <node id="20877" label="Q3UMR5" cy:nodeId="12476">
    <graphics x="4356.396272008621" z="0.0" y="4734.629915425191"/>
  </node>
  <node id="20876" label="Q91ZA3" cy:nodeId="12477">
    <graphics x="4375.911379971909" z="0.0" y="4746.633692111795"/>
  </node>
  <node id="20875" label="Q61879" cy:nodeId="12478">
    <graphics x="2677.7621194965145" z="0.0" y="4790.13525390625"/>
  </node>
  <node id="20874" label="P63101" cy:nodeId="12479">
    <graphics x="3411.9771752431498" z="0.0" y="5742.938877309015"/>
  </node>
  <node id="20873" label="Q9QWI6" cy:nodeId="12480">
    <graphics x="3402.3006615712748" z="0.0" y="5770.859287465265"/>
  </node>
  <node id="20872" label="Q8R001" cy:nodeId="12481">
    <graphics x="2646.0570413715145" z="0.0" y="4805.73779296875"/>
  </node>
  <node id="20871" label="Q9DBF1" cy:nodeId="12482">
    <graphics x="3394.1907982900248" z="0.0" y="5799.274326527765"/>
  </node>
  <node id="20870" label="Q64516" cy:nodeId="12483">
    <graphics x="4395.81669591309" z="0.0" y="4757.978668570229"/>
  </node>
  <node id="20869" label="Q8VDN2" cy:nodeId="12484">
    <graphics x="5841.151329762674" z="0.0" y="4539.153308617242"/>
  </node>
  <node id="20868" label="Q6PCP5" cy:nodeId="12485">
    <graphics x="4416.089988131401" z="0.0" y="4768.652173907823"/>
  </node>
  <node id="20867" label="P23506" cy:nodeId="12486">
    <graphics x="2984.9393471266826" z="0.0" y="3883.123553619832"/>
  </node>
  <node id="20866" label="Q9D6J5" cy:nodeId="12487">
    <graphics x="4436.708613943476" z="0.0" y="4778.642287179568"/>
  </node>
  <node id="20865" label="Q00612" cy:nodeId="12488">
    <graphics x="4884.77294921875" z="0.0" y="5878.779384409736"/>
  </node>
  <node id="20864" label="Q9WTT4" cy:nodeId="12489">
    <graphics x="4866.7412109375" z="0.0" y="5908.657802378486"/>
  </node>
  <node id="20863" label="Q5FWK3" cy:nodeId="12490">
    <graphics x="3387.6724877431498" z="0.0" y="5828.096592152765"/>
  </node>
  <node id="20862" label="Q8CHU3" cy:nodeId="12491">
    <graphics x="2945.3932045485576" z="0.0" y="3907.172137604207"/>
  </node>
  <node id="20861" label="P59999" cy:nodeId="12492">
    <graphics x="2615.6918069965145" z="0.0" y="4823.81005859375"/>
  </node>
  <node id="20860" label="Q9CVB6" cy:nodeId="12493">
    <graphics x="2586.8583109027645" z="0.0" y="4844.23779296875"/>
  </node>
  <node id="20859" label="Q9CQC7" cy:nodeId="12494">
    <graphics x="4457.649544972346" z="0.0" y="4787.937850702281"/>
  </node>
  <node id="20858" label="O88737" cy:nodeId="12495">
    <graphics x="2559.7386819965145" z="0.0" y="4866.8916015625"/>
  </node>
  <node id="20857" label="Q6PH08" cy:nodeId="12496">
    <graphics x="5811.955528981424" z="0.0" y="4546.976550804742"/>
  </node>
  <node id="20856" label="P39053" cy:nodeId="12497">
    <graphics x="4851.0791015625" z="0.0" y="5939.843349253486"/>
  </node>
  <node id="20855" label="Q6PB66" cy:nodeId="12498">
    <graphics x="4478.889392867191" z="0.0" y="4796.528482516327"/>
  </node>
  <node id="20854" label="P31324" cy:nodeId="12499">
    <graphics x="3382.7662377431498" z="0.0" y="5857.236240590265"/>
  </node>
  <node id="20853" label="Q8BR92" cy:nodeId="12500">
    <graphics x="5783.263634450174" z="0.0" y="4556.483875023492"/>
  </node>
  <node id="20852" label="P97772" cy:nodeId="12501">
    <graphics x="5755.173790700174" z="0.0" y="4567.643542992242"/>
  </node>
  <node id="20851" label="Q8CHT0" cy:nodeId="12502">
    <graphics x="4500.404435425156" z="0.0" y="4804.404587980936"/>
  </node>
  <node id="20850" label="P29758" cy:nodeId="12503">
    <graphics x="4522.170643086021" z="0.0" y="4811.557370490195"/>
  </node>
  <node id="20849" label="Q99L47" cy:nodeId="12504">
    <graphics x="3379.4869408681498" z="0.0" y="5886.603428090265"/>
  </node>
  <node id="20848" label="Q7TQF7" cy:nodeId="12505">
    <graphics x="4837.880859375" z="0.0" y="5972.149501597236"/>
  </node>
  <node id="20847" label="P15116" cy:nodeId="12506">
    <graphics x="5727.779747731424" z="0.0" y="4580.417468773492"/>
  </node>
  <node id="20846" label="P06837" cy:nodeId="12507">
    <graphics x="5701.175255543924" z="0.0" y="4594.762195335992"/>
  </node>
  <node id="20845" label="P07901" cy:nodeId="12508">
    <graphics x="3377.8446068837748" z="0.0" y="5916.107334340265"/>
  </node>
  <node id="20844" label="P61982" cy:nodeId="12509">
    <graphics x="3377.8446068837748" z="0.0" y="5945.657139027765"/>
  </node>
  <node id="20843" label="Q9WUA3" cy:nodeId="12510">
    <graphics x="2909.4901283766826" z="0.0" y="3936.381610260457"/>
  </node>
  <node id="20842" label="Q60597" cy:nodeId="12511">
    <graphics x="4544.163705770161" z="0.0" y="4817.97884129774"/>
  </node>
  <node id="20841" label="P05063" cy:nodeId="12512">
    <graphics x="4827.2255859375" z="0.0" y="6005.380458628486"/>
  </node>
  <node id="20840" label="Q8BKZ9" cy:nodeId="12513">
    <graphics x="4566.359060029806" z="0.0" y="4823.661828439161"/>
  </node>
  <node id="20839" label="Q9CPW4" cy:nodeId="12514">
    <graphics x="2534.5052835590145" z="0.0" y="4891.62890625"/>
  </node>
  <node id="20838" label="P17182" cy:nodeId="12515">
    <graphics x="4819.177734375" z="0.0" y="6039.337978159736"/>
  </node>
  <node id="20837" label="Q8BMS1" cy:nodeId="12516">
    <graphics x="4588.731916483277" z="0.0" y="4828.599984742179"/>
  </node>
  <node id="20836" label="Q9Z268" cy:nodeId="12517">
    <graphics x="3379.4869408681498" z="0.0" y="5975.161533559015"/>
  </node>
  <node id="20835" label="Q8BGD5" cy:nodeId="12518">
    <graphics x="4611.257287501572" z="0.0" y="4832.787794915623"/>
  </node>
  <node id="20834" label="P42125" cy:nodeId="12519">
    <graphics x="4633.91001511636" z="0.0" y="4836.220581709309"/>
  </node>
  <node id="20833" label="Q61290" cy:nodeId="12520">
    <graphics x="5675.449669606424" z="0.0" y="4610.630359398492"/>
  </node>
  <node id="20832" label="Q8R0S4" cy:nodeId="12521">
    <graphics x="5650.689903981424" z="0.0" y="4627.966785179742"/>
  </node>
  <node id="20831" label="P08226" cy:nodeId="12522">
    <graphics x="5626.980431325174" z="0.0" y="4646.713855492242"/>
  </node>
  <node id="20830" label="Q91ZX7" cy:nodeId="12523">
    <graphics x="5604.401329762674" z="0.0" y="4666.808093773492"/>
  </node>
  <node id="20829" label="Q8BLK3" cy:nodeId="12524">
    <graphics x="5583.028282887674" z="0.0" y="4688.180652367242"/>
  </node>
  <node id="20828" label="P62835" cy:nodeId="12525">
    <graphics x="5562.934532887674" z="0.0" y="4710.760242210992"/>
  </node>
  <node id="20827" label="Q6R891" cy:nodeId="12526">
    <graphics x="3382.7662377431498" z="0.0" y="6004.528721059015"/>
  </node>
  <node id="20826" label="P60766" cy:nodeId="12527">
    <graphics x="3387.6724877431498" z="0.0" y="6033.668369496515"/>
  </node>
  <node id="20825" label="Q99104" cy:nodeId="12528">
    <graphics x="2511.3163187152645" z="0.0" y="4918.29248046875"/>
  </node>
  <node id="20824" label="Q62048" cy:nodeId="12529">
    <graphics x="3394.1907982900248" z="0.0" y="6062.490146840265"/>
  </node>
  <node id="20823" label="Q9D6M3" cy:nodeId="12530">
    <graphics x="4656.664799118223" z="0.0" y="4838.894511137934"/>
  </node>
  <node id="20822" label="P47857" cy:nodeId="12531">
    <graphics x="2877.8985756423076" z="0.0" y="3970.207782135457"/>
  </node>
  <node id="20821" label="P68368" cy:nodeId="12532">
    <graphics x="2490.3202249652645" z="0.0" y="4946.7138671875"/>
  </node>
  <node id="20820" label="Q922R8" cy:nodeId="12533">
    <graphics x="3402.3006615712748" z="0.0" y="6090.905185902765"/>
  </node>
  <node id="20819" label="P10637" cy:nodeId="12534">
    <graphics x="2471.6473734027645" z="0.0" y="4976.7138671875"/>
  </node>
  <node id="20818" label="P55088" cy:nodeId="12535">
    <graphics x="5544.187462575174" z="0.0" y="4734.469714867242"/>
  </node>
  <node id="20817" label="Q9DBG3" cy:nodeId="12536">
    <graphics x="4813.78515625" z="0.0" y="6073.816493784736"/>
  </node>
  <node id="20816" label="Q6IRU5" cy:nodeId="12537">
    <graphics x="4811.0810546875" z="0.0" y="6108.609462534736"/>
  </node>
  <node id="20815" label="P17183" cy:nodeId="12538">
    <graphics x="4811.0810546875" z="0.0" y="6143.507411753486"/>
  </node>
  <node id="20814" label="Q9QXS6" cy:nodeId="12539">
    <graphics x="2455.4178812152645" z="0.0" y="5008.1025390625"/>
  </node>
  <node id="20813" label="Q8BHL5" cy:nodeId="12540">
    <graphics x="2851.2074135329326" z="0.0" y="4008.020526276082"/>
  </node>
  <node id="20812" label="O88712" cy:nodeId="12541">
    <graphics x="2829.9134682204326" z="0.0" y="4049.115496979207"/>
  </node>
  <node id="20811" label="Q9DCB8" cy:nodeId="12542">
    <graphics x="4679.4962253137655" z="0.0" y="4840.806596763146"/>
  </node>
  <node id="20810" label="Q9Z1J3" cy:nodeId="12543">
    <graphics x="4702.378793910034" z="0.0" y="4841.95470302902"/>
  </node>
  <node id="20809" label="Q8BMF3" cy:nodeId="12544">
    <graphics x="4725.286947994529" z="0.0" y="4842.33754764719"/>
  </node>
  <node id="20808" label="Q62425" cy:nodeId="12545">
    <graphics x="4748.195102079026" z="0.0" y="4841.95470302902"/>
  </node>
  <node id="20807" label="P38647" cy:nodeId="12546">
    <graphics x="4771.077670675295" z="0.0" y="4840.806596763146"/>
  </node>
  <node id="20806" label="P63011" cy:nodeId="12547">
    <graphics x="4813.78515625" z="0.0" y="6178.300380503486"/>
  </node>
  <node id="20805" label="Q60598" cy:nodeId="12548">
    <graphics x="2441.7323343402645" z="0.0" y="5040.6875"/>
  </node>
  <node id="20804" label="P61161" cy:nodeId="12549">
    <graphics x="2430.6791116840145" z="0.0" y="5074.24462890625"/>
  </node>
  <node id="20803" label="Q9Z0X1" cy:nodeId="12550">
    <graphics x="4793.909096870837" z="0.0" y="4838.894511137934"/>
  </node>
  <node id="20802" label="Q8VDP6" cy:nodeId="12551">
    <graphics x="3411.9771752431498" z="0.0" y="6118.826084340265"/>
  </node>
  <node id="20801" label="Q99L43" cy:nodeId="12552">
    <graphics x="4816.6638808727" z="0.0" y="4836.220581709309"/>
  </node>
  <node id="20800" label="Q8CAQ8" cy:nodeId="12553">
    <graphics x="4839.316608487487" z="0.0" y="4832.787794915623"/>
  </node>
  <node id="20799" label="Q9JLZ3" cy:nodeId="12554">
    <graphics x="4861.8419795057835" z="0.0" y="4828.599984742179"/>
  </node>
  <node id="20798" label="P17665" cy:nodeId="12555">
    <graphics x="4884.214835959254" z="0.0" y="4823.661828439161"/>
  </node>
  <node id="20797" label="Q60931" cy:nodeId="12556">
    <graphics x="4906.410190218899" z="0.0" y="4817.97884129774"/>
  </node>
  <node id="20796" label="Q8QZT1" cy:nodeId="12557">
    <graphics x="4928.403252903039" z="0.0" y="4811.557370490195"/>
  </node>
  <node id="20795" label="Q8VD37" cy:nodeId="12558">
    <graphics x="5526.850548512674" z="0.0" y="4759.228992210992"/>
  </node>
  <node id="20794" label="P16858" cy:nodeId="12559">
    <graphics x="2814.4139565016826" z="0.0" y="4092.727313385457"/>
  </node>
  <node id="20793" label="P62746" cy:nodeId="12560">
    <graphics x="2422.3280374652645" z="0.0" y="5108.580078125"/>
  </node>
  <node id="20792" label="P11627" cy:nodeId="12561">
    <graphics x="5510.982872731424" z="0.0" y="4784.954578148492"/>
  </node>
  <node id="20791" label="P13595" cy:nodeId="12562">
    <graphics x="5496.637657887674" z="0.0" y="4811.559558617242"/>
  </node>
  <node id="20790" label="Q8BKX1" cy:nodeId="12563">
    <graphics x="2416.7303812152645" z="0.0" y="5143.47021484375"/>
  </node>
  <node id="20789" label="O70589" cy:nodeId="12564">
    <graphics x="5483.863732106424" z="0.0" y="4838.953113304742"/>
  </node>
  <node id="20788" label="P16330" cy:nodeId="12565">
    <graphics x="3423.1905541493998" z="0.0" y="6146.165439809015"/>
  </node>
  <node id="20787" label="P03995" cy:nodeId="12566">
    <graphics x="2804.9972084548076" z="0.0" y="4138.043719635457"/>
  </node>
  <node id="20786" label="P99024" cy:nodeId="12567">
    <graphics x="2413.9232523090145" z="0.0" y="5178.69482421875"/>
  </node>
  <node id="20785" label="Q9Z218" cy:nodeId="12568">
    <graphics x="5472.704064137674" z="0.0" y="4867.043445335992"/>
  </node>
  <node id="20784" label="P84091" cy:nodeId="12569">
    <graphics x="4819.177734375" z="0.0" y="6212.778896128486"/>
  </node>
  <node id="20783" label="Q9QXJ1" cy:nodeId="12570">
    <graphics x="3435.9058861806498" z="0.0" y="6172.839756215265"/>
  </node>
  <node id="20782" label="P68033" cy:nodeId="12571">
    <graphics x="2413.9232523090145" z="0.0" y="5214.03125"/>
  </node>
  <node id="20781" label="Q9R0Y5" cy:nodeId="12572">
    <graphics x="5463.196739918924" z="0.0" y="4895.734851585992"/>
  </node>
  <node id="20780" label="P47802" cy:nodeId="12573">
    <graphics x="4950.169460563904" z="0.0" y="4804.404587980936"/>
  </node>
  <node id="20779" label="Q6PIE5" cy:nodeId="12574">
    <graphics x="5455.373986012674" z="0.0" y="4924.930652367242"/>
  </node>
  <node id="20778" label="P70414" cy:nodeId="12575">
    <graphics x="5449.261681325174" z="0.0" y="4954.532214867242"/>
  </node>
  <node id="20777" label="P28652" cy:nodeId="12576">
    <graphics x="3450.0841088368998" z="0.0" y="6198.766025746515"/>
  </node>
  <node id="20776" label="Q99K85" cy:nodeId="12577">
    <graphics x="2801.8385170485576" z="0.0" y="4184.219989166707"/>
  </node>
  <node id="20775" label="P17156" cy:nodeId="12578">
    <graphics x="3465.6810326650248" z="0.0" y="6223.864170277765"/>
  </node>
  <node id="20774" label="P62204" cy:nodeId="12579">
    <graphics x="3482.6488061025248" z="0.0" y="6248.057041371515"/>
  </node>
  <node id="20773" label="P68254" cy:nodeId="12580">
    <graphics x="3500.9349389150248" z="0.0" y="6271.269443715265"/>
  </node>
  <node id="20772" label="Q9DBJ1" cy:nodeId="12581">
    <graphics x="4827.2255859375" z="0.0" y="6246.735927378486"/>
  </node>
  <node id="20771" label="P23818" cy:nodeId="12582">
    <graphics x="5444.880821950174" z="0.0" y="4984.438953148492"/>
  </node>
  <node id="20770" label="Q68FF6" cy:nodeId="12583">
    <graphics x="3520.4825463368998" z="0.0" y="6293.429599965265"/>
  </node>
  <node id="20769" label="P30999" cy:nodeId="12584">
    <graphics x="3541.2318139150248" z="0.0" y="6314.469150746515"/>
  </node>
  <node id="20768" label="P62482" cy:nodeId="12585">
    <graphics x="5442.246544606424" z="0.0" y="5014.549304710992"/>
  </node>
  <node id="20767" label="Q60996" cy:nodeId="12586">
    <graphics x="3563.1180443837748" z="0.0" y="6334.323154652765"/>
  </node>
  <node id="20766" label="Q9R0N7" cy:nodeId="12587">
    <graphics x="4837.880859375" z="0.0" y="6279.967372690986"/>
  </node>
  <node id="20765" label="Q62261" cy:nodeId="12588">
    <graphics x="2416.7303812152645" z="0.0" y="5249.255859375"/>
  </node>
  <node id="20764" label="Q925I1" cy:nodeId="12589">
    <graphics x="4971.684503121869" z="0.0" y="4796.528482516328"/>
  </node>
  <node id="20763" label="P48453" cy:nodeId="12590">
    <graphics x="3586.0740990712748" z="0.0" y="6352.930088246515"/>
  </node>
  <node id="20762" label="Q4ACU6" cy:nodeId="12591">
    <graphics x="2804.9972084548076" z="0.0" y="4230.396258697957"/>
  </node>
  <node id="20761" label="Q8BYM5" cy:nodeId="12592">
    <graphics x="5441.367638356424" z="0.0" y="5044.762195335992"/>
  </node>
  <node id="20760" label="Q9JIS5" cy:nodeId="12593">
    <graphics x="4851.0791015625" z="0.0" y="6312.273036753486"/>
  </node>
  <node id="20759" label="P40630" cy:nodeId="12594">
    <graphics x="4992.924351016714" z="0.0" y="4787.937850702281"/>
  </node>
  <node id="20758" label="Q9CS84" cy:nodeId="12595">
    <graphics x="3610.0284447743998" z="0.0" y="6370.232334340265"/>
  </node>
  <node id="20757" label="O08539" cy:nodeId="12596">
    <graphics x="4866.7412109375" z="0.0" y="6343.459071909736"/>
  </node>
  <node id="20756" label="O70318" cy:nodeId="12597">
    <graphics x="2422.3280374652645" z="0.0" y="5284.14599609375"/>
  </node>
  <node id="20755" label="Q64332" cy:nodeId="12598">
    <graphics x="4884.77294921875" z="0.0" y="6373.337489878486"/>
  </node>
  <node id="20754" label="P60761" cy:nodeId="12599">
    <graphics x="3634.9075951650248" z="0.0" y="6386.176670277765"/>
  </node>
  <node id="20753" label="P00493" cy:nodeId="12600">
    <graphics x="2814.4139565016826" z="0.0" y="4275.712664947957"/>
  </node>
  <node id="20752" label="Q9Z0R4" cy:nodeId="12601">
    <graphics x="5442.246544606424" z="0.0" y="5074.975574242242"/>
  </node>
  <node id="20751" label="Q80Y14" cy:nodeId="12602">
    <graphics x="5013.865282045584" z="0.0" y="4778.642287179568"/>
  </node>
  <node id="20750" label="Q5SQX6" cy:nodeId="12603">
    <graphics x="3660.6344018056498" z="0.0" y="6400.713779652765"/>
  </node>
  <node id="20749" label="Q9CPQ1" cy:nodeId="12604">
    <graphics x="5034.483907857659" z="0.0" y="4768.652173907823"/>
  </node>
  <node id="20748" label="Q3UHL1" cy:nodeId="12605">
    <graphics x="4905.06591796875" z="0.0" y="6401.728603159736"/>
  </node>
  <node id="20747" label="Q60932" cy:nodeId="12606">
    <graphics x="5054.75720007597" z="0.0" y="4757.978668570229"/>
  </node>
  <node id="20746" label="O08585" cy:nodeId="12607">
    <graphics x="4927.49755859375" z="0.0" y="6428.462001597236"/>
  </node>
  <node id="20745" label="Q9QYR6" cy:nodeId="12608">
    <graphics x="2430.6791116840145" z="0.0" y="5318.4814453125"/>
  </node>
  <node id="20744" label="B9EKR1" cy:nodeId="12609">
    <graphics x="5444.880821950174" z="0.0" y="5105.085925804742"/>
  </node>
  <node id="20743" label="O54991" cy:nodeId="12610">
    <graphics x="5449.261681325174" z="0.0" y="5134.992664085992"/>
  </node>
  <node id="20742" label="P45376" cy:nodeId="12611">
    <graphics x="2829.9134682204326" z="0.0" y="4319.324481354207"/>
  </node>
  <node id="20741" label="Q62419" cy:nodeId="12612">
    <graphics x="4951.93408203125" z="0.0" y="6453.376552378486"/>
  </node>
  <node id="20740" label="P60469" cy:nodeId="12613">
    <graphics x="5455.373986012674" z="0.0" y="5164.593738304742"/>
  </node>
  <node id="20739" label="Q91ZJ5" cy:nodeId="12614">
    <graphics x="2851.2074135329326" z="0.0" y="4360.419696197957"/>
  </node>
  <node id="20738" label="P63328" cy:nodeId="12615">
    <graphics x="3687.1290307118998" z="0.0" y="6413.798740590265"/>
  </node>
  <node id="20737" label="O55042" cy:nodeId="12616">
    <graphics x="4978.22705078125" z="0.0" y="6476.322353159736"/>
  </node>
  <node id="20736" label="P28667" cy:nodeId="12617">
    <graphics x="3714.3101830556498" z="0.0" y="6425.391025746515"/>
  </node>
  <node id="20735" label="Q9D8B3" cy:nodeId="12618">
    <graphics x="5463.196739918924" z="0.0" y="5193.789539085992"/>
  </node>
  <node id="20734" label="P01831" cy:nodeId="12619">
    <graphics x="5472.704064137674" z="0.0" y="5222.480945335992"/>
  </node>
  <node id="20733" label="P20357" cy:nodeId="12620">
    <graphics x="2441.7323343402645" z="0.0" y="5352.04443359375"/>
  </node>
  <node id="20732" label="Q3UVX5" cy:nodeId="12621">
    <graphics x="5483.863732106424" z="0.0" y="5250.571277367242"/>
  </node>
  <node id="20731" label="Q91WC3" cy:nodeId="12622">
    <graphics x="5074.662516017152" z="0.0" y="4746.633692111795"/>
  </node>
  <node id="20730" label="Q8BWF0" cy:nodeId="12623">
    <graphics x="5094.177623980439" z="0.0" y="4734.629915425191"/>
  </node>
  <node id="20729" label="Q8BH04" cy:nodeId="12624">
    <graphics x="5113.280728077645" z="0.0" y="4721.980745198966"/>
  </node>
  <node id="20728" label="Q99MR8" cy:nodeId="12625">
    <graphics x="5131.950492576382" z="0.0" y="4708.700308943995"/>
  </node>
  <node id="20727" label="Q99PJ0" cy:nodeId="12626">
    <graphics x="5496.637657887674" z="0.0" y="5277.965320335992"/>
  </node>
  <node id="20726" label="Q9D6F9" cy:nodeId="12627">
    <graphics x="2455.4178812152645" z="0.0" y="5384.62353515625"/>
  </node>
  <node id="20725" label="P41216" cy:nodeId="12628">
    <graphics x="5150.166065729364" z="0.0" y="4694.803439214842"/>
  </node>
  <node id="20724" label="Q6P1F6" cy:nodeId="12629">
    <graphics x="3742.0933861806498" z="0.0" y="6435.454990590265"/>
  </node>
  <node id="20723" label="P28663" cy:nodeId="12630">
    <graphics x="5510.982872731424" z="0.0" y="5304.569812523492"/>
  </node>
  <node id="20722" label="P68181" cy:nodeId="12631">
    <graphics x="3770.3931908681498" z="0.0" y="6443.958896840265"/>
  </node>
  <node id="20721" label="Q80VP1" cy:nodeId="12632">
    <graphics x="5526.850548512674" z="0.0" y="5330.295398460992"/>
  </node>
  <node id="20720" label="Q6PIC6" cy:nodeId="12633">
    <graphics x="5544.187462575174" z="0.0" y="5355.055164085992"/>
  </node>
  <node id="20719" label="Q9R111" cy:nodeId="12634">
    <graphics x="3799.1217064931498" z="0.0" y="6450.877353871515"/>
  </node>
  <node id="20718" label="Q9D0F9" cy:nodeId="12635">
    <graphics x="2877.8985756423076" z="0.0" y="4398.232684479207"/>
  </node>
  <node id="20717" label="Q62465" cy:nodeId="12636">
    <graphics x="5167.907103063145" z="0.0" y="4680.305657043694"/>
  </node>
  <node id="20716" label="Q9WUB3" cy:nodeId="12637">
    <graphics x="5562.934532887674" z="0.0" y="5378.764636742242"/>
  </node>
  <node id="20715" label="Q91VZ6" cy:nodeId="12638">
    <graphics x="5583.028282887674" z="0.0" y="5401.343738304742"/>
  </node>
  <node id="20714" label="Q8CHC4" cy:nodeId="12639">
    <graphics x="2909.4901283766826" z="0.0" y="4432.058856354207"/>
  </node>
  <node id="20713" label="Q61411" cy:nodeId="12640">
    <graphics x="5604.401329762674" z="0.0" y="5422.716785179742"/>
  </node>
  <node id="20712" label="Q60875" cy:nodeId="12641">
    <graphics x="3828.1903100087748" z="0.0" y="6456.187900746515"/>
  </node>
  <node id="20711" label="O55023" cy:nodeId="12642">
    <graphics x="2945.3932045485576" z="0.0" y="4461.268329010457"/>
  </node>
  <node id="20710" label="Q80UU9" cy:nodeId="12643">
    <graphics x="5626.980431325174" z="0.0" y="5442.810535179742"/>
  </node>
  <node id="20709" label="Q9R0P9" cy:nodeId="12644">
    <graphics x="2984.9393471266826" z="0.0" y="4485.316668854207"/>
  </node>
  <node id="20708" label="P0C0A3" cy:nodeId="12645">
    <graphics x="5650.689903981424" z="0.0" y="5461.557605492242"/>
  </node>
  <node id="20707" label="Q9WU78" cy:nodeId="12646">
    <graphics x="3857.5091576650248" z="0.0" y="6459.875400746515"/>
  </node>
  <node id="20706" label="P50396" cy:nodeId="12647">
    <graphics x="3886.9876732900248" z="0.0" y="6461.927646840265"/>
  </node>
  <node id="20705" label="P62821" cy:nodeId="12648">
    <graphics x="5006.2197265625" z="0.0" y="6497.162196909736"/>
  </node>
  <node id="20704" label="Q9CQI6" cy:nodeId="12649">
    <graphics x="2471.6473734027645" z="0.0" y="5416.01220703125"/>
  </node>
  <node id="20703" label="Q9CRB9" cy:nodeId="12650">
    <graphics x="5185.153790100305" z="0.0" y="4665.22315460534"/>
  </node>
  <node id="20702" label="P35279" cy:nodeId="12651">
    <graphics x="5035.74267578125" z="0.0" y="6515.769618784736"/>
  </node>
  <node id="20701" label="Q9DC28" cy:nodeId="12652">
    <graphics x="3916.5345482900248" z="0.0" y="6462.338291371515"/>
  </node>
  <node id="20700" label="Q8VBV7" cy:nodeId="12653">
    <graphics x="3946.0587182118998" z="0.0" y="6461.106357777765"/>
  </node>
  <node id="20699" label="P47708" cy:nodeId="12654">
    <graphics x="5066.61865234375" z="0.0" y="6532.033778940986"/>
  </node>
  <node id="20698" label="Q60605" cy:nodeId="12655">
    <graphics x="2490.3202249652645" z="0.0" y="5446.01220703125"/>
  </node>
  <node id="20697" label="P22723" cy:nodeId="12656">
    <graphics x="5675.449669606424" z="0.0" y="5478.894519554742"/>
  </node>
  <node id="20696" label="P62743" cy:nodeId="12657">
    <graphics x="5098.66259765625" z="0.0" y="6545.856044565986"/>
  </node>
  <node id="20695" label="P19246" cy:nodeId="12658">
    <graphics x="2511.3163187152645" z="0.0" y="5474.43359375"/>
  </node>
  <node id="20694" label="Q80U28" cy:nodeId="12659">
    <graphics x="3975.4686303212748" z="0.0" y="6458.235264027765"/>
  </node>
  <node id="20693" label="Q61553" cy:nodeId="12660">
    <graphics x="2534.5052835590145" z="0.0" y="5501.09716796875"/>
  </node>
  <node id="20692" label="Q810U3" cy:nodeId="12661">
    <graphics x="5701.175255543924" z="0.0" y="5494.762195335992"/>
  </node>
  <node id="20691" label="P67871" cy:nodeId="12662">
    <graphics x="4004.6737084462748" z="0.0" y="6453.734775746515"/>
  </node>
  <node id="20690" label="Q8R3V5" cy:nodeId="12663">
    <graphics x="3027.3919838454326" z="0.0" y="4503.756610260457"/>
  </node>
  <node id="20689" label="P58281" cy:nodeId="12664">
    <graphics x="5201.886864489694" z="0.0" y="4649.572777132581"/>
  </node>
  <node id="20688" label="P27546" cy:nodeId="12665">
    <graphics x="2559.7386819965145" z="0.0" y="5525.833984375"/>
  </node>
  <node id="20687" label="P63318" cy:nodeId="12666">
    <graphics x="4033.5831322743998" z="0.0" y="6447.617588246515"/>
  </node>
  <node id="20686" label="P70296" cy:nodeId="12667">
    <graphics x="5727.779747731424" z="0.0" y="5509.107410179742"/>
  </node>
  <node id="20685" label="P56564" cy:nodeId="12668">
    <graphics x="5755.173790700174" z="0.0" y="5521.881335960992"/>
  </node>
  <node id="20684" label="P00405" cy:nodeId="12669">
    <graphics x="5218.087637520026" z="0.0" y="4633.372004102249"/>
  </node>
  <node id="20683" label="Q9EPJ9" cy:nodeId="12670">
    <graphics x="4062.1085228993998" z="0.0" y="6439.903721059015"/>
  </node>
  <node id="20682" label="Q5DQR4" cy:nodeId="12671">
    <graphics x="5131.6806640625" z="0.0" y="6557.153407847236"/>
  </node>
  <node id="20681" label="O35239" cy:nodeId="12672">
    <graphics x="3071.9598549391826" z="0.0" y="4516.243914947957"/>
  </node>
  <node id="20680" label="Q8BW75" cy:nodeId="12673">
    <graphics x="5233.738014992785" z="0.0" y="4616.63892971286"/>
  </node>
  <node id="20679" label="O08599" cy:nodeId="12674">
    <graphics x="5165.4755859375" z="0.0" y="6565.858485972236"/>
  </node>
  <node id="20678" label="Q9QXS1" cy:nodeId="12675">
    <graphics x="2586.8583109027645" z="0.0" y="5548.48828125"/>
  </node>
  <node id="20677" label="P20444" cy:nodeId="12676">
    <graphics x="4090.1607689931498" z="0.0" y="6430.616123402765"/>
  </node>
  <node id="20676" label="Q60930" cy:nodeId="12677">
    <graphics x="5248.820517431138" z="0.0" y="4599.3922426757"/>
  </node>
  <node id="20675" label="Q99P72" cy:nodeId="12678">
    <graphics x="5783.263634450174" z="0.0" y="5533.041003929742"/>
  </node>
  <node id="20674" label="O35643" cy:nodeId="12679">
    <graphics x="5199.84326171875" z="0.0" y="6571.918544565986"/>
  </node>
  <node id="20673" label="Q8R191" cy:nodeId="12680">
    <graphics x="5234.5771484375" z="0.0" y="6575.296962534736"/>
  </node>
  <node id="20672" label="P61164" cy:nodeId="12681">
    <graphics x="2615.6918069965145" z="0.0" y="5568.916015625"/>
  </node>
  <node id="20671" label="O55100" cy:nodeId="12682">
    <graphics x="5269.46826171875" z="0.0" y="6575.973720347236"/>
  </node>
  <node id="20670" label="Q5RJI5" cy:nodeId="12683">
    <graphics x="4117.6534447744" z="0.0" y="6419.783603871515"/>
  </node>
  <node id="20669" label="Q8BZ98" cy:nodeId="12684">
    <graphics x="5304.30712890625" z="0.0" y="6573.944423472236"/>
  </node>
  <node id="20668" label="Q61644" cy:nodeId="12685">
    <graphics x="4144.50158930565" z="0.0" y="6407.440342152765"/>
  </node>
  <node id="20667" label="P19096" cy:nodeId="12686">
    <graphics x="3117.8128822829326" z="0.0" y="4522.546161041707"/>
  </node>
  <node id="20666" label="P35564" cy:nodeId="12687">
    <graphics x="4170.62268305565" z="0.0" y="6393.623935902765"/>
  </node>
  <node id="20665" label="Q9CZ42" cy:nodeId="12688">
    <graphics x="5263.318299602286" z="0.0" y="4581.651205341919"/>
  </node>
  <node id="20664" label="Q61490" cy:nodeId="12689">
    <graphics x="5811.955528981424" z="0.0" y="5542.548328148492"/>
  </node>
  <node id="20663" label="P46096" cy:nodeId="12690">
    <graphics x="5338.8837890625" z="0.0" y="6569.221767222236"/>
  </node>
  <node id="20662" label="Q922H2" cy:nodeId="12691">
    <graphics x="5277.215169331439" z="0.0" y="4563.435632188938"/>
  </node>
  <node id="20661" label="P28740" cy:nodeId="12692">
    <graphics x="2646.0570413715145" z="0.0" y="5586.98828125"/>
  </node>
  <node id="20660" label="Q9CWZ7" cy:nodeId="12693">
    <graphics x="5841.151329762674" z="0.0" y="5550.371082054742"/>
  </node>
  <node id="20659" label="O35857" cy:nodeId="12694">
    <graphics x="5290.49560558641" z="0.0" y="4544.765867690201"/>
  </node>
  <node id="20658" label="Q9D880" cy:nodeId="12695">
    <graphics x="5303.144775812635" z="0.0" y="4525.662763592995"/>
  </node>
  <node id="20657" label="P43406" cy:nodeId="12696">
    <graphics x="5870.752403981424" z="0.0" y="5556.483386742242"/>
  </node>
  <node id="20656" label="Q71LX4" cy:nodeId="12697">
    <graphics x="2677.7621194965145" z="0.0" y="5602.5908203125"/>
  </node>
  <node id="20655" label="P48962" cy:nodeId="12698">
    <graphics x="5315.14855249924" z="0.0" y="4506.1476556297075"/>
  </node>
  <node id="20654" label="Q8CI94" cy:nodeId="12699">
    <graphics x="5900.659142262674" z="0.0" y="5560.864246117242"/>
  </node>
  <node id="20653" label="Q8K021" cy:nodeId="12700">
    <graphics x="5372.99072265625" z="0.0" y="6561.833583628486"/>
  </node>
  <node id="20652" label="P63321" cy:nodeId="12701">
    <graphics x="5406.4228515625" z="0.0" y="6551.824794565986"/>
  </node>
  <node id="20651" label="P48722" cy:nodeId="12702">
    <graphics x="3164.0973061110576" z="0.0" y="4522.546161041707"/>
  </node>
  <node id="20650" label="O35143" cy:nodeId="12703">
    <graphics x="5326.493528957673" z="0.0" y="4486.242339688525"/>
  </node>
  <node id="20649" label="P84096" cy:nodeId="12704">
    <graphics x="5930.769982106424" z="0.0" y="5563.498523460992"/>
  </node>
  <node id="20648" label="P26645" cy:nodeId="12705">
    <graphics x="2710.6068460590145" z="0.0" y="5615.625"/>
  </node>
  <node id="20647" label="P28661" cy:nodeId="12706">
    <graphics x="2744.3827249652645" z="0.0" y="5626.0087890625"/>
  </node>
  <node id="20646" label="P42208" cy:nodeId="12707">
    <graphics x="2778.8773538715145" z="0.0" y="5633.67578125"/>
  </node>
  <node id="20645" label="Q9WV34" cy:nodeId="12708">
    <graphics x="5960.982872731424" z="0.0" y="5564.377429710992"/>
  </node>
  <node id="20644" label="Q9Z2Q6" cy:nodeId="12709">
    <graphics x="4195.93518305565" z="0.0" y="6378.377353871515"/>
  </node>
  <node id="20643" label="Q9Z2I0" cy:nodeId="12710">
    <graphics x="5337.1670342952675" z="0.0" y="4465.969047470215"/>
  </node>
  <node id="20642" label="P18760" cy:nodeId="12711">
    <graphics x="2813.8714944965145" z="0.0" y="5638.578125"/>
  </node>
  <node id="20641" label="P40124" cy:nodeId="12712">
    <graphics x="5991.195763356424" z="0.0" y="5563.498523460992"/>
  </node>
  <node id="20640" label="O54983" cy:nodeId="12713">
    <graphics x="3209.9503334548076" z="0.0" y="4516.243914947957"/>
  </node>
  <node id="20639" label="Q8VDQ8" cy:nodeId="12714">
    <graphics x="2849.1449319965145" z="0.0" y="5640.6845703125"/>
  </node>
  <node id="20638" label="P08551" cy:nodeId="12715">
    <graphics x="2884.4747659808895" z="0.0" y="5639.982421875"/>
  </node>
  <node id="20637" label="Q8K4Z3" cy:nodeId="12716">
    <graphics x="5347.157147567012" z="0.0" y="4445.35042165814"/>
  </node>
  <node id="20636" label="P08553" cy:nodeId="12717">
    <graphics x="2919.6368753558895" z="0.0" y="5636.47509765625"/>
  </node>
  <node id="20635" label="Q61699" cy:nodeId="12718">
    <graphics x="3254.5182045485576" z="0.0" y="4503.756610260457"/>
  </node>
  <node id="20634" label="P12960" cy:nodeId="12719">
    <graphics x="6021.306603200174" z="0.0" y="5560.864246117242"/>
  </node>
  <node id="20633" label="Q7TSJ2" cy:nodeId="12720">
    <graphics x="2954.4088480121395" z="0.0" y="5630.18505859375"/>
  </node>
  <node id="20632" label="O35136" cy:nodeId="12721">
    <graphics x="6051.212853200174" z="0.0" y="5556.483386742242"/>
  </node>
  <node id="20631" label="O55131" cy:nodeId="12722">
    <graphics x="5438.97802734375" z="0.0" y="6539.255458628486"/>
  </node>
  <node id="20630" label="Q9WV55" cy:nodeId="12723">
    <graphics x="5470.4619140625" z="0.0" y="6524.201259409736"/>
  </node>
  <node id="20629" label="Q7TMB8" cy:nodeId="12724">
    <graphics x="2988.5709573871395" z="0.0" y="5621.15283203125"/>
  </node>
  <node id="20628" label="Q80TZ3" cy:nodeId="12725">
    <graphics x="5500.6845703125" z="0.0" y="6506.752040659736"/>
  </node>
  <node id="20627" label="O88643" cy:nodeId="12726">
    <graphics x="4220.3614525869" z="0.0" y="6361.747471059015"/>
  </node>
  <node id="20626" label="Q8BIJ6" cy:nodeId="12727">
    <graphics x="5356.452711089726" z="0.0" y="4424.40949062927"/>
  </node>
  <node id="20625" label="P55302" cy:nodeId="12728">
    <graphics x="4243.82580805565" z="0.0" y="6343.786045277765"/>
  </node>
  <node id="20624" label="Q91XV3" cy:nodeId="12729">
    <graphics x="6080.814415700174" z="0.0" y="5550.371082054742"/>
  </node>
  <node id="20623" label="P48758" cy:nodeId="12730">
    <graphics x="3296.9708412673076" z="0.0" y="4485.316668854207"/>
  </node>
  <node id="20622" label="Q9R1V6" cy:nodeId="12731">
    <graphics x="6110.010216481424" z="0.0" y="5542.548328148492"/>
  </node>
  <node id="20621" label="P23242" cy:nodeId="12732">
    <graphics x="6138.701622731424" z="0.0" y="5533.041003929742"/>
  </node>
  <node id="20620" label="Q9QY76" cy:nodeId="12733">
    <graphics x="5529.4638671875" z="0.0" y="6487.013759409736"/>
  </node>
  <node id="20619" label="P57780" cy:nodeId="12734">
    <graphics x="3021.9081155902645" z="0.0" y="5609.4345703125"/>
  </node>
  <node id="20618" label="Q9CR16" cy:nodeId="12735">
    <graphics x="4266.25549555565" z="0.0" y="6324.548252309015"/>
  </node>
  <node id="20617" label="Q99NE5" cy:nodeId="12736">
    <graphics x="5556.626953125" z="0.0" y="6465.104579722236"/>
  </node>
  <node id="20616" label="Q8K183" cy:nodeId="12737">
    <graphics x="3336.5169838454326" z="0.0" y="4461.268329010457"/>
  </node>
  <node id="20615" label="P11798" cy:nodeId="12738">
    <graphics x="4287.58166743065" z="0.0" y="6304.093662465265"/>
  </node>
  <node id="20614" label="P48036" cy:nodeId="12739">
    <graphics x="5582.0107421875" z="0.0" y="6441.156337534736"/>
  </node>
  <node id="20613" label="Q9D1T0" cy:nodeId="12740">
    <graphics x="6166.791954762674" z="0.0" y="5521.881335960992"/>
  </node>
  <node id="20612" label="Q61316" cy:nodeId="12741">
    <graphics x="3372.4200600173076" z="0.0" y="4432.058856354207"/>
  </node>
  <node id="20611" label="O08917" cy:nodeId="12742">
    <graphics x="6194.185509450174" z="0.0" y="5509.107410179742"/>
  </node>
  <node id="20610" label="Q60634" cy:nodeId="12743">
    <graphics x="6220.790489918924" z="0.0" y="5494.762195335992"/>
  </node>
  <node id="20609" label="P97300" cy:nodeId="12744">
    <graphics x="6246.516075856424" z="0.0" y="5478.894519554742"/>
  </node>
  <node id="20608" label="Q8CHH9" cy:nodeId="12745">
    <graphics x="3054.2084085590145" z="0.0" y="5595.1044921875"/>
  </node>
  <node id="20607" label="Q9CR62" cy:nodeId="12746">
    <graphics x="5365.043342903772" z="0.0" y="4403.169642734425"/>
  </node>
  <node id="20606" label="Q91VR7" cy:nodeId="12747">
    <graphics x="3085.2677347308895" z="0.0" y="5578.25390625"/>
  </node>
  <node id="20605" label="Q68FH0" cy:nodeId="12748">
    <graphics x="3114.8907816058895" z="0.0" y="5558.98876953125"/>
  </node>
  <node id="20604" label="Q7TMM9" cy:nodeId="12749">
    <graphics x="3142.8895609027645" z="0.0" y="5537.4306640625"/>
  </node>
  <node id="20603" label="Q2PFD7" cy:nodeId="12750">
    <graphics x="4307.73791743065" z="0.0" y="6282.485264027765"/>
  </node>
  <node id="20602" label="Q920P5" cy:nodeId="12751">
    <graphics x="3404.0116127516826" z="0.0" y="4398.232684479207"/>
  </node>
  <node id="20601" label="Q3THE2" cy:nodeId="12752">
    <graphics x="3169.0868265277645" z="0.0" y="5513.716796875"/>
  </node>
  <node id="20600" label="Q61151" cy:nodeId="12753">
    <graphics x="4326.6622338369" z="0.0" y="6259.790439809015"/>
  </node>
  <node id="20599" label="Q91VT4" cy:nodeId="12754">
    <graphics x="5372.9194483683805" z="0.0" y="4381.65460017646"/>
  </node>
  <node id="20598" label="Q78IK2" cy:nodeId="12755">
    <graphics x="5380.07223087764" z="0.0" y="4359.888392515595"/>
  </node>
  <node id="20597" label="Q8R5C5" cy:nodeId="12756">
    <graphics x="3193.3170511371395" z="0.0" y="5487.99609375"/>
  </node>
  <node id="20596" label="Q03157" cy:nodeId="12757">
    <graphics x="6271.275353200174" z="0.0" y="5461.557605492242"/>
  </node>
  <node id="20595" label="Q8CGK3" cy:nodeId="12758">
    <graphics x="5386.493701685184" z="0.0" y="4337.895329831455"/>
  </node>
  <node id="20594" label="Q3ULJ0" cy:nodeId="12759">
    <graphics x="3430.7027748610576" z="0.0" y="4360.419696197957"/>
  </node>
  <node id="20593" label="Q61206" cy:nodeId="12760">
    <graphics x="3451.9967201735576" z="0.0" y="4319.324481354207"/>
  </node>
  <node id="20592" label="Q9QYA2" cy:nodeId="12761">
    <graphics x="5392.176688826605" z="0.0" y="4315.69997557181"/>
  </node>
  <node id="20591" label="Q8R366" cy:nodeId="12762">
    <graphics x="6294.984825856424" z="0.0" y="5442.810535179742"/>
  </node>
  <node id="20590" label="F6SEU4" cy:nodeId="12763">
    <graphics x="6317.564415700174" z="0.0" y="5422.716785179742"/>
  </node>
  <node id="20589" label="Q921M7" cy:nodeId="12764">
    <graphics x="4344.2960228994" z="0.0" y="6236.078525746515"/>
  </node>
  <node id="20588" label="Q8BH59" cy:nodeId="12765">
    <graphics x="5397.114845129623" z="0.0" y="4293.3271191183385"/>
  </node>
  <node id="20587" label="Q8BRT1" cy:nodeId="12766">
    <graphics x="3215.4269144183895" z="0.0" y="5460.431640625"/>
  </node>
  <node id="20586" label="P20152" cy:nodeId="12767">
    <graphics x="3235.2777444965145" z="0.0" y="5431.19775390625"/>
  </node>
  <node id="20585" label="Q9CZW5" cy:nodeId="12768">
    <graphics x="5401.302655303067" z="0.0" y="4270.8017481000425"/>
  </node>
  <node id="20584" label="Q6P9K9" cy:nodeId="12769">
    <graphics x="4360.58459711815" z="0.0" y="6211.423740590265"/>
  </node>
  <node id="20583" label="Q9CQW1" cy:nodeId="12770">
    <graphics x="5605.46240234375" z="0.0" y="6415.312587534736"/>
  </node>
  <node id="20582" label="Q921J2" cy:nodeId="12771">
    <graphics x="4375.4776635244" z="0.0" y="6185.901279652765"/>
  </node>
  <node id="20581" label="Q9ERD7" cy:nodeId="12772">
    <graphics x="3252.7425882465145" z="0.0" y="5400.47900390625"/>
  </node>
  <node id="20580" label="P43006" cy:nodeId="12773">
    <graphics x="6338.936974293924" z="0.0" y="5401.343738304742"/>
  </node>
  <node id="20579" label="Q80XN0" cy:nodeId="12774">
    <graphics x="5404.735442096753" z="0.0" y="4248.149020485255"/>
  </node>
  <node id="20578" label="Q9CWS0" cy:nodeId="12775">
    <graphics x="4388.9298119619" z="0.0" y="6159.591221059015"/>
  </node>
  <node id="20577" label="Q8K0T0" cy:nodeId="12776">
    <graphics x="5626.8408203125" z="0.0" y="6387.729579722236"/>
  </node>
  <node id="20576" label="P13020" cy:nodeId="12777">
    <graphics x="3267.7118265277645" z="0.0" y="5368.47021484375"/>
  </node>
  <node id="20575" label="Q61330" cy:nodeId="12778">
    <graphics x="6359.031212575174" z="0.0" y="5378.764636742242"/>
  </node>
  <node id="20574" label="Q63810" cy:nodeId="12779">
    <graphics x="4400.8985619619" z="0.0" y="6132.573642934015"/>
  </node>
  <node id="20573" label="Q9Z2W9" cy:nodeId="12780">
    <graphics x="6377.778282887674" z="0.0" y="5355.055164085992"/>
  </node>
  <node id="20572" label="Q04447" cy:nodeId="12781">
    <graphics x="3467.4962318923076" z="0.0" y="4275.712664947957"/>
  </node>
  <node id="20571" label="Q9Z0P4" cy:nodeId="12782">
    <graphics x="6395.114708668924" z="0.0" y="5330.295398460992"/>
  </node>
  <node id="20570" label="Q9D8Y0" cy:nodeId="12783">
    <graphics x="4411.3477807119" z="0.0" y="6104.933017934015"/>
  </node>
  <node id="20569" label="Q9CYT6" cy:nodeId="12784">
    <graphics x="6410.982872731424" z="0.0" y="5304.569812523492"/>
  </node>
  <node id="20568" label="Q99KB8" cy:nodeId="12785">
    <graphics x="5407.409371525378" z="0.0" y="4225.394236483393"/>
  </node>
  <node id="20567" label="Q9D6K5" cy:nodeId="12786">
    <graphics x="5409.321457150591" z="0.0" y="4202.56281028785"/>
  </node>
  <node id="20566" label="Q6URW6" cy:nodeId="12787">
    <graphics x="3280.0907327777645" z="0.0" y="5335.373046875"/>
  </node>
  <node id="20565" label="Q9R1V7" cy:nodeId="12788">
    <graphics x="6425.328087575174" z="0.0" y="5277.965320335992"/>
  </node>
  <node id="20564" label="Q9ES97" cy:nodeId="12789">
    <graphics x="5646.017578125" z="0.0" y="6358.572841440986"/>
  </node>
  <node id="20563" label="D3YVF0" cy:nodeId="12790">
    <graphics x="3289.8006937152645" z="0.0" y="5301.39697265625"/>
  </node>
  <node id="20562" label="Q810U4" cy:nodeId="12791">
    <graphics x="6438.102013356424" z="0.0" y="5250.571277367242"/>
  </node>
  <node id="20561" label="A2CG49" cy:nodeId="12792">
    <graphics x="4420.2442650869" z="0.0" y="6076.754306996515"/>
  </node>
  <node id="20560" label="P53994" cy:nodeId="12793">
    <graphics x="5662.876953125" z="0.0" y="6328.018153940986"/>
  </node>
  <node id="20559" label="O89053" cy:nodeId="12794">
    <graphics x="3296.7806741840145" z="0.0" y="5266.7568359375"/>
  </node>
  <node id="20558" label="Q9JIA1" cy:nodeId="12795">
    <graphics x="4427.56115961815" z="0.0" y="6048.124424184015"/>
  </node>
  <node id="20557" label="Q91WS0" cy:nodeId="12796">
    <graphics x="5410.469563416464" z="0.0" y="4179.680241691582"/>
  </node>
  <node id="20556" label="Q8K400" cy:nodeId="12797">
    <graphics x="5677.318359375" z="0.0" y="6296.248134409736"/>
  </node>
  <node id="20555" label="Q91ZZ3" cy:nodeId="12798">
    <graphics x="5689.25390625" z="0.0" y="6263.455165659736"/>
  </node>
  <node id="20554" label="Q9QZF2" cy:nodeId="12799">
    <graphics x="6449.261193043924" z="0.0" y="5222.480945335992"/>
  </node>
  <node id="20553" label="Q812A2" cy:nodeId="12800">
    <graphics x="4433.2755150869" z="0.0" y="6019.132724965265"/>
  </node>
  <node id="20552" label="Q9Z0E0" cy:nodeId="12801">
    <graphics x="4437.3702416494" z="0.0" y="5989.867588246515"/>
  </node>
  <node id="20551" label="Q4KMM3" cy:nodeId="12802">
    <graphics x="5410.852408034634" z="0.0" y="4156.772087607085"/>
  </node>
  <node id="20550" label="Q9CR95" cy:nodeId="12803">
    <graphics x="6458.768517262674" z="0.0" y="5193.789539085992"/>
  </node>
  <node id="20549" label="Q60737" cy:nodeId="12804">
    <graphics x="4439.8321557119" z="0.0" y="5960.420810902765"/>
  </node>
  <node id="20548" label="P80560" cy:nodeId="12805">
    <graphics x="5698.6123046875" z="0.0" y="6229.835536753486"/>
  </node>
  <node id="20547" label="P35802" cy:nodeId="12806">
    <graphics x="6466.591759450174" z="0.0" y="5164.593738304742"/>
  </node>
  <node id="20546" label="Q9EQZ6" cy:nodeId="12807">
    <graphics x="4440.6534447744" z="0.0" y="5930.882236684015"/>
  </node>
  <node id="20545" label="P23927" cy:nodeId="12808">
    <graphics x="3476.9129799391826" z="0.0" y="4230.396258697957"/>
  </node>
  <node id="20544" label="Q9QYX7" cy:nodeId="12809">
    <graphics x="5705.337890625" z="0.0" y="6195.591884409736"/>
  </node>
  <node id="20543" label="Q03137" cy:nodeId="12810">
    <graphics x="6472.704064137674" z="0.0" y="5134.992664085992"/>
  </node>
  <node id="20542" label="P58771" cy:nodeId="12811">
    <graphics x="3300.9862405902645" z="0.0" y="5231.67138671875"/>
  </node>
  <node id="20541" label="Q8VHW2" cy:nodeId="12812">
    <graphics x="6477.084435231424" z="0.0" y="5105.085925804742"/>
  </node>
  <node id="20540" label="O54774" cy:nodeId="12813">
    <graphics x="5709.38916015625" z="0.0" y="6160.929775034736"/>
  </node>
  <node id="20539" label="Q9DB73" cy:nodeId="12814">
    <graphics x="6479.718712575174" z="0.0" y="5074.975574242242"/>
  </node>
  <node id="20538" label="O88342" cy:nodeId="12815">
    <graphics x="3302.3910257465145" z="0.0" y="5196.36328125"/>
  </node>
  <node id="20537" label="Q9R0P5" cy:nodeId="12816">
    <graphics x="3480.0716713454326" z="0.0" y="4184.219989166707"/>
  </node>
  <node id="20536" label="Q9R1V4" cy:nodeId="12817">
    <graphics x="6480.598107106424" z="0.0" y="5044.762195335992"/>
  </node>
  <node id="20535" label="Q00493" cy:nodeId="12818">
    <graphics x="5710.7421875" z="0.0" y="6126.058193003486"/>
  </node>
  <node id="21149" label="Q01097" cy:nodeId="12204">
    <graphics x="6479.718712575174" z="0.0" y="5014.549304710992"/>
  </node>
  <node id="21148" label="Q80Z38" cy:nodeId="12205">
    <graphics x="3476.9129799391826" z="0.0" y="4138.043719635457"/>
  </node>
  <node id="21147" label="Q9CQZ5" cy:nodeId="12206">
    <graphics x="5410.469563416463" z="0.0" y="4133.863933522573"/>
  </node>
  <node id="21146" label="Q9D6J6" cy:nodeId="12207">
    <graphics x="5409.3214571505905" z="0.0" y="4110.981364926303"/>
  </node>
  <node id="21145" label="O08749" cy:nodeId="12208">
    <graphics x="5407.409371525377" z="0.0" y="4088.1499387307613"/>
  </node>
  <node id="21144" label="Q9D051" cy:nodeId="12209">
    <graphics x="5404.735442096751" z="0.0" y="4065.395154728899"/>
  </node>
  <node id="21143" label="Q9D3D9" cy:nodeId="12210">
    <graphics x="5401.302655303064" z="0.0" y="4042.7424271141117"/>
  </node>
  <node id="21142" label="O09111" cy:nodeId="12211">
    <graphics x="5397.114845129619" z="0.0" y="4020.2170560958166"/>
  </node>
  <node id="21141" label="Q03265" cy:nodeId="12212">
    <graphics x="5392.176688826601" z="0.0" y="3997.8441996423453"/>
  </node>
  <node id="21140" label="P68510" cy:nodeId="12213">
    <graphics x="4439.8321557119" z="0.0" y="5901.344150746515"/>
  </node>
  <node id="21139" label="P12382" cy:nodeId="12214">
    <graphics x="3467.4962318923076" z="0.0" y="4092.727313385457"/>
  </node>
  <node id="21138" label="P35438" cy:nodeId="12215">
    <graphics x="6477.084435231424" z="0.0" y="4984.438953148492"/>
  </node>
  <node id="21137" label="P05202" cy:nodeId="12216">
    <graphics x="5386.49370168518" z="0.0" y="3975.6488453827014"/>
  </node>
  <node id="21136" label="Q9QUI0" cy:nodeId="12217">
    <graphics x="4437.3702416494" z="0.0" y="5871.896885121515"/>
  </node>
  <node id="21135" label="Q06335" cy:nodeId="12218">
    <graphics x="6472.704064137674" z="0.0" y="4954.532214867242"/>
  </node>
  <node id="21134" label="P23819" cy:nodeId="12219">
    <graphics x="6466.591759450174" z="0.0" y="4924.930652367242"/>
  </node>
  <node id="21133" label="P35436" cy:nodeId="12220">
    <graphics x="6458.768517262674" z="0.0" y="4895.734851585992"/>
  </node>
  <node id="21132" label="Q9CZU6" cy:nodeId="12221">
    <graphics x="5380.072230877635" z="0.0" y="3953.655782698561"/>
  </node>
  <node id="21131" label="Q9DCD0" cy:nodeId="12222">
    <graphics x="3451.9967201735576" z="0.0" y="4049.115496979207"/>
  </node>
  <node id="21130" label="P51863" cy:nodeId="12223">
    <graphics x="5709.38916015625" z="0.0" y="6091.186610972236"/>
  </node>
  <node id="21129" label="Q9Z1G3" cy:nodeId="12224">
    <graphics x="5705.337890625" z="0.0" y="6056.524989878486"/>
  </node>
  <node id="21128" label="P62259" cy:nodeId="12225">
    <graphics x="4433.2755150869" z="0.0" y="5842.632236684015"/>
  </node>
  <node id="21127" label="P47757" cy:nodeId="12226">
    <graphics x="3300.9862405902645" z="0.0" y="5161.0546875"/>
  </node>
  <node id="21126" label="Q8C8R3" cy:nodeId="12227">
    <graphics x="6449.261193043924" z="0.0" y="4867.043445335992"/>
  </node>
  <node id="21125" label="P16546" cy:nodeId="12228">
    <graphics x="3296.7806741840145" z="0.0" y="5125.96923828125"/>
  </node>
  <node id="21124" label="P63330" cy:nodeId="12229">
    <graphics x="4427.56115961815" z="0.0" y="5813.640049184015"/>
  </node>
  <node id="21123" label="Q76MZ3" cy:nodeId="12230">
    <graphics x="4420.2442650869" z="0.0" y="5785.010654652765"/>
  </node>
  <node id="21122" label="Q9CQZ6" cy:nodeId="12231">
    <graphics x="5372.919448368375" z="0.0" y="3931.889575037696"/>
  </node>
  <node id="21121" label="Q9CQ54" cy:nodeId="12232">
    <graphics x="5365.043342903767" z="0.0" y="3910.374532479732"/>
  </node>
  <node id="21120" label="Q9DCT2" cy:nodeId="12233">
    <graphics x="5356.45271108972" z="0.0" y="3889.1346845848866"/>
  </node>
  <node id="21119" label="Q9CQ69" cy:nodeId="12234">
    <graphics x="5347.157147567005" z="0.0" y="3868.193753556018"/>
  </node>
  <node id="21118" label="P08249" cy:nodeId="12235">
    <graphics x="5337.167034295261" z="0.0" y="3847.575127743942"/>
  </node>
  <node id="21117" label="Q9D6R2" cy:nodeId="12236">
    <graphics x="5326.493528957666" z="0.0" y="3827.301835525632"/>
  </node>
  <node id="21116" label="P54071" cy:nodeId="12237">
    <graphics x="5315.148552499232" z="0.0" y="3807.396519584451"/>
  </node>
  <node id="21115" label="P06151" cy:nodeId="12238">
    <graphics x="3430.7027748610576" z="0.0" y="4008.020526276082"/>
  </node>
  <node id="21114" label="Q9DB20" cy:nodeId="12239">
    <graphics x="5303.144775812627" z="0.0" y="3787.8814116211634"/>
  </node>
  <node id="21113" label="Q9CQH3" cy:nodeId="12240">
    <graphics x="5290.495605586402" z="0.0" y="3768.778307523958"/>
  </node>
  <node id="21112" label="Q3UHD9" cy:nodeId="12241">
    <graphics x="4411.3477807119" z="0.0" y="5756.831943715265"/>
  </node>
  <node id="21111" label="Q9Z2H5" cy:nodeId="12242">
    <graphics x="3289.8006937152645" z="0.0" y="5091.3291015625"/>
  </node>
  <node id="21110" label="Q6P9K8" cy:nodeId="12243">
    <graphics x="3404.0116127516826" z="0.0" y="3970.207782135457"/>
  </node>
  <node id="21109" label="O88952" cy:nodeId="12244">
    <graphics x="6438.102013356424" z="0.0" y="4838.953113304742"/>
  </node>
  <node id="21108" label="P19783" cy:nodeId="12245">
    <graphics x="5277.21516933143" z="0.0" y="3750.1085430252215"/>
  </node>
  <node id="21107" label="Q8BK64" cy:nodeId="12246">
    <graphics x="3372.4200600173076" z="0.0" y="3936.381610260457"/>
  </node>
  <node id="21106" label="P63038" cy:nodeId="12247">
    <graphics x="5263.318299602277" z="0.0" y="3731.89296987224"/>
  </node>
  <node id="21105" label="Q8BH95" cy:nodeId="12248">
    <graphics x="5248.820517431129" z="0.0" y="3714.1519325384597"/>
  </node>
  <node id="21104" label="Q9CZ13" cy:nodeId="12249">
    <graphics x="5233.738014992774" z="0.0" y="3696.9052455013007"/>
  </node>
  <node id="21103" label="Q9D0M3" cy:nodeId="12250">
    <graphics x="5218.087637520015" z="0.0" y="3680.172171111912"/>
  </node>
  <node id="21102" label="Q99LC3" cy:nodeId="12251">
    <graphics x="5201.886864489683" z="0.0" y="3663.9713980815804"/>
  </node>
  <node id="21101" label="Q99LY9" cy:nodeId="12252">
    <graphics x="5185.153790100294" z="0.0" y="3648.321020608822"/>
  </node>
  <node id="21100" label="Q8BMF4" cy:nodeId="12253">
    <graphics x="5167.907103063134" z="0.0" y="3633.2385181704685"/>
  </node>
  <node id="21099" label="Q05920" cy:nodeId="12254">
    <graphics x="5150.166065729353" z="0.0" y="3618.740735999321"/>
  </node>
  <node id="21098" label="P63085" cy:nodeId="12255">
    <graphics x="4400.8985619619" z="0.0" y="5729.190830434015"/>
  </node>
  <node id="21097" label="P61027" cy:nodeId="12256">
    <graphics x="5698.6123046875" z="0.0" y="6022.281337534736"/>
  </node>
  <node id="21096" label="Q61598" cy:nodeId="12257">
    <graphics x="4388.9298119619" z="0.0" y="5702.173740590265"/>
  </node>
  <node id="21095" label="P56480" cy:nodeId="12258">
    <graphics x="5131.950492576371" z="0.0" y="3604.8438662701683"/>
  </node>
  <node id="21094" label="P17742" cy:nodeId="12259">
    <graphics x="4375.4776635244" z="0.0" y="5675.863193715265"/>
  </node>
  <node id="21093" label="P68404" cy:nodeId="12260">
    <graphics x="4360.58459711815" z="0.0" y="5650.341221059015"/>
  </node>
  <node id="21092" label="P67778" cy:nodeId="12261">
    <graphics x="5113.280728077634" z="0.0" y="3591.563430015198"/>
  </node>
  <node id="21091" label="Q9JLJ2" cy:nodeId="12262">
    <graphics x="3336.5169838454326" z="0.0" y="3907.172137604207"/>
  </node>
  <node id="21090" label="Q91VR2" cy:nodeId="12263">
    <graphics x="5094.1776239804285" z="0.0" y="3578.914259788973"/>
  </node>
  <node id="21089" label="Q9CPQ8" cy:nodeId="12264">
    <graphics x="5074.662516017141" z="0.0" y="3566.910483102369"/>
  </node>
  <node id="21088" label="Q91VD9" cy:nodeId="12265">
    <graphics x="5054.757200075958" z="0.0" y="3555.565506643936"/>
  </node>
  <node id="21087" label="Q9DCS9" cy:nodeId="12266">
    <graphics x="5034.483907857648" z="0.0" y="3544.892001306342"/>
  </node>
  <node id="21086" label="Q9CR68" cy:nodeId="12267">
    <graphics x="5013.865282045572" z="0.0" y="3534.9018880345984"/>
  </node>
  <node id="21085" label="P52196" cy:nodeId="12268">
    <graphics x="4992.9243510167025" z="0.0" y="3525.606324511885"/>
  </node>
  <node id="21084" label="P05132" cy:nodeId="12269">
    <graphics x="4344.2960228994" z="0.0" y="5625.685947621515"/>
  </node>
  <node id="21083" label="Q9CQJ8" cy:nodeId="12270">
    <graphics x="4971.684503121857" z="0.0" y="3517.0156926978393"/>
  </node>
</graph>
